# Supplementary material for: Understanding nitrate formation in a world with less sulfate
Source: Copernicus journal article supplement (doi:10.5194/acp-18-12765-2018), 2018-09-05
Supplement: Supplementary file 2 [file acp-18-12765-2018-supplement.zip]

Archive with 33 entries (31 files):
- acp-18-12765-2018-supplement-title-page.pdf
- DATA/
- DATA/Weber_Vasilakos_comparison.xlsx
- DATA/average2001PH
- DATA/average2011PH
- DATA/average_entire2011.csv
- DATA/average_entire2001.csv
- DATA/ORGANIC PH.xlsx
- DATA/RAW DATA FOR DIURNALS/
- DATA/RAW DATA FOR DIURNALS/data_extract_JST_nov_mod2011.csv
- DATA/RAW DATA FOR DIURNALS/data_extract_YRK_dec_mod2011.csv
- DATA/RAW DATA FOR DIURNALS/data_extract_SOAS_jul_mod2011.csv
- DATA/RAW DATA FOR DIURNALS/data_extract_JST_may_mod2011.csv
- DATA/RAW DATA FOR DIURNALS/data_extract_YRK_jul_mod2011.csv
- DATA/RAW DATA FOR DIURNALS/SOAS.csv
- DATA/RAW DATA FOR DIURNALS/data_extract_YRK_dec_mod.csv
- DATA/RAW DATA FOR DIURNALS/data_extract_SOAS_aug_mod2011.csv
- DATA/RAW DATA FOR DIURNALS/SCAPe.csv
- DATA/RAW DATA FOR DIURNALS/data_extract_YRK_jul_mod.csv
- DATA/RAW DATA FOR DIURNALS/data_extract_JST_sep_mod2011.csv
- DATA/RAW DATA FOR DIURNALS/data_extract_SOAS_mod2011.csv
- DATA/RAW DATA FOR DIURNALS/data_extract_SOAS_jun_mod2011.csv
- DATA/RAW DATA FOR DIURNALS/data_extract_JST_aug_mod.csv
- DATA/RAW DATA FOR DIURNALS/data_extract_JST_aug_mod2011.csv
- DATA/RAW DATA FOR DIURNALS/data_extract_JST_may_mod.csv
- DATA/RAW DATA FOR DIURNALS/data_extract_SOAS_jun_mod.csv
- DATA/RAW DATA FOR DIURNALS/data_extract_SOAS_mod.csv
- DATA/RAW DATA FOR DIURNALS/data_extract_SOAS_jul_mod.csv
- DATA/RAW DATA FOR DIURNALS/data_extract_JST_sep_mod.csv
- DATA/RAW DATA FOR DIURNALS/data_extract_SOAS_aug_mod.csv
- DATA/RAW DATA FOR DIURNALS/data_extract_JST_nov_mod.csv
- DATA/acp-2018-406-supplement-version1.pdf
- DATA/Readme.txt.txt
