# Supplementary material for: Understanding nitrate formation in a world with less sulfate
Source: Copernicus journal article supplement (doi:10.5194/acp-18-12765-2018), 2018-09-05
Supplement: Supplementary file 2 [file acp-18-12765-2018-supplement.zip › acp-18-12765-2018-supplement-title-page.pdf]

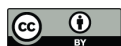

## *Supplement of*

# **Understanding nitrate formation in a world with less sulfate**

**Petros Vasilakos et al.**

*Correspondence to:* Athanasios Nenes (athanasios.nenes@epfl.ch)

- acp-18-12765-2018-supplement-title-page.pdf
- DATA
  - ORGANIC PH.xlsx
  - RAW DATA FOR DIURNALS
    - \* SCAPe.csv
    - \* SOAS.csv
    - \* data\_extract\_JST\_aug\_mod.csv
    - \* data\_extract\_JST\_aug\_mod2011.csv
    - \* data\_extract\_JST\_may\_mod.csv
    - \* data\_extract\_JST\_may\_mod2011.csv
    - \* data\_extract\_JST\_nov\_mod.csv
    - \* data\_extract\_JST\_nov\_mod2011.csv
    - \* data\_extract\_JST\_sep\_mod.csv
    - \* data\_extract\_JST\_sep\_mod2011.csv
    - \* data\_extract\_SOAS\_aug\_mod.csv
    - \* data\_extract\_SOAS\_aug\_mod2011.csv
    - \* data\_extract\_SOAS\_jul\_mod.csv
    - \* data\_extract\_SOAS\_jul\_mod2011.csv
    - \* data\_extract\_SOAS\_jun\_mod.csv
    - \* data\_extract\_SOAS\_jun\_mod2011.csv
    - \* data\_extract\_SOAS\_mod.csv
    - \* data\_extract\_SOAS\_mod2011.csv
    - \* data\_extract\_YRK\_dec\_mod.csv
    - \* data\_extract\_YRK\_dec\_mod2011.csv
    - \* data\_extract\_YRK\_jul\_mod.csv
    - \* data\_extract\_YRK\_jul\_mod2011.csv
  - Readme.txt.txt
  - Weber\_Vasilakos\_comparison.xlsx

- acp-2018-406-supplement-version1.pdf
- average2001PH
- average2011PH
- average\_entire2001.csv
- average\_entire2011.csv

The copyright of individual parts of the supplement might differ from the CC BY 4.0 License.
