# Supplementary material for: Understanding nitrate formation in a world with less sulfate
Source: Copernicus journal article supplement (doi:10.5194/acp-18-12765-2018), 2018-09-05
Supplement: Supplementary file 2 [file acp-18-12765-2018-supplement.zip › DATA/average_entire2001.csv]

Date	Hour	COL_NUM	ROW_NUM	SO2	HNO3	NH3	NA	CL	K	MG	CA	SO4	NO3	NH4	T	RH
EST	1-24hr	umol/m3	umol/m3	umol/m3	umol/m3	umol/m3	umol/m3	umol/m3	umol/m3	umol/m3	umol/m3	umol/m3	K
2011001	10000	1	1	0	0.003	0	0.002	0.001	0	0	0	0.007	0	0.003	292.939	0.823
2011001	10000	1	2	0	0.004	0	0.002	0.001	0	0	0	0.007	0	0.004	292.775	0.822
2011001	10000	1	3	0	0.004	0	0.002	0.001	0	0	0	0.006	0	0.004	292.529	0.821
2011001	10000	1	4	0	0.004	0	0.002	0.001	0	0	0	0.006	0	0.004	292.332	0.822
2011001	10000	1	5	0	0.004	0	0.002	0.001	0	0	0	0.006	0	0.004	292.169	0.821
2011001	10000	1	6	0	0.004	0	0.002	0.001	0	0	0	0.006	0	0.004	292	0.82
2011001	10000	1	7	0	0.004	0	0.002	0.001	0	0	0	0.006	0	0.004	291.816	0.82
2011001	10000	1	8	0	0.004	0	0.002	0.001	0	0	0	0.006	0	0.004	291.657	0.817
2011001	10000	1	9	0	0.004	0	0.002	0.001	0	0	0	0.006	0	0.004	291.541	0.817
2011001	10000	1	10	0	0.004	0	0.002	0.001	0	0	0	0.006	0	0.004	291.431	0.814
2011001	10000	1	11	0	0.004	0	0.002	0.001	0	0	0	0.006	0	0.004	291.318	0.816
2011001	10000	1	12	0	0.005	0	0.002	0.001	0	0	0	0.006	0	0.004	291.167	0.815
2011001	10000	1	13	0	0.005	0	0.002	0.001	0	0	0	0.007	0	0.004	291.055	0.816
2011001	10000	1	14	0	0.006	0	0.002	0.001	0	0	0	0.007	0	0.004	290.911	0.82
2011001	10000	1	15	0	0.006	0	0.002	0.001	0	0	0	0.007	0	0.004	290.749	0.827
2011001	10000	1	16	0	0.006	0	0.002	0.001	0	0	0	0.007	0	0.005	290.583	0.831
2011001	10000	1	17	0	0.006	0	0.002	0.001	0	0	0	0.007	0	0.005	290.4	0.836
2011001	10000	1	18	0	0.006	0	0.002	0.001	0	0	0	0.007	0	0.005	290.248	0.839
2011001	10000	1	19	0	0.006	0	0.002	0.001	0	0	0	0.007	0	0.005	290.053	0.841
2011001	10000	1	20	0.001	0.006	0	0.002	0.001	0	0	0	0.008	0	0.005	289.909	0.844
2011001	10000	1	21	0.001	0.007	0	0.003	0.001	0	0	0	0.008	0	0.005	289.725	0.846
2011001	10000	1	22	0.001	0.007	0	0.003	0.001	0	0	0	0.008	0	0.005	289.575	0.848
2011001	10000	1	23	0.001	0.008	0	0.003	0.001	0	0	0	0.008	0	0.006	289.477	0.845
2011001	10000	1	24	0.001	0.008	0	0.003	0.001	0	0	0	0.008	0	0.006	289.301	0.848
2011001	10000	1	25	0.001	0.008	0	0.003	0.001	0	0	0	0.008	0	0.006	289.205	0.85
2011001	10000	1	26	0.001	0.008	0	0.003	0.001	0	0	0	0.008	0	0.006	289.122	0.851
2011001	10000	1	27	0.001	0.008	0	0.003	0.001	0	0	0	0.009	0	0.006	289.068	0.85
2011001	10000	1	28	0.001	0.008	0	0.003	0.001	0	0	0	0.009	0	0.006	288.961	0.854
2011001	10000	1	29	0.001	0.008	0	0.003	0.001	0	0	0	0.009	0	0.007	288.821	0.862
2011001	10000	1	30	0.001	0.009	0	0.003	0.001	0	0	0	0.01	0	0.007	288.776	0.863
2011001	10000	1	31	0.002	0.009	0	0.003	0.001	0	0	0	0.01	0	0.007	288.675	0.866
2011001	10000	1	32	0.001	0.009	0	0.003	0.001	0	0	0	0.01	0	0.007	288.631	0.868
2011001	10000	1	33	0.001	0.009	0	0.003	0.001	0	0	0	0.01	0	0.007	288.563	0.869
2011001	10000	1	34	0.001	0.009	0	0.003	0.001	0	0	0	0.01	0	0.007	288.488	0.872
2011001	10000	1	35	0.002	0.009	0	0.003	0.001	0	0	0	0.01	0	0.007	288.441	0.872
2011001	10000	1	36	0.001	0.009	0	0.003	0.001	0	0	0	0.011	0	0.007	288.34	0.874
2011001	10000	1	37	0.001	0.009	0	0.003	0.001	0	0	0	0.011	0	0.007	288.283	0.877
2011001	10000	1	38	0.002	0.01	0	0.003	0.001	0	0	0	0.012	0	0.008	288.218	0.876
2011001	10000	1	39	0.002	0.011	0	0.003	0.001	0	0	0	0.012	0	0.008	288.173	0.873
2011001	10000	1	40	0.002	0.011	0	0.003	0.001	0	0	0	0.012	0	0.008	288.138	0.872
2011001	10000	1	41	0.002	0.011	0	0.003	0.001	0	0	0	0.012	0	0.007	288.042	0.875
2011001	10000	1	42	0.002	0.01	0	0.003	0.001	0	0	0	0.012	0	0.007	287.942	0.881
2011001	10000	1	43	0.002	0.01	0	0.003	0.001	0	0	0	0.012	0	0.007	287.776	0.887
2011001	10000	1	44	0.003	0.01	0	0.003	0.001	0	0	0	0.013	0	0.007	287.639	0.891
2011001	10000	1	45	0.005	0.01	0	0.003	0.001	0	0	0	0.014	0	0.007	287.544	0.892
2011001	10000	1	46	0.005	0.01	0	0.003	0.001	0	0	0	0.013	0	0.007	287.408	0.893
2011001	10000	1	47	0.002	0.009	0	0.003	0.001	0	0	0	0.012	0	0.007	287.287	0.893
2011001	10000	1	48	0.002	0.01	0	0.003	0.001	0	0	0	0.012	0	0.007	287.153	0.892
2011001	10000	1	49	0.002	0.01	0	0.003	0.001	0	0	0	0.012	0	0.007	286.996	0.891
2011001	10000	1	50	0.002	0.01	0	0.003	0.001	0	0	0	0.012	0	0.007	286.855	0.892
2011001	10000	1	51	0.002	0.011	0	0.003	0.001	0	0	0	0.013	0	0.007	286.655	0.894
2011001	10000	1	52	0.003	0.011	0	0.003	0.001	0	0	0	0.013	0	0.007	286.495	0.894
2011001	10000	1	53	0.004	0.011	0	0.003	0.001	0	0	0	0.013	0	0.007	286.346	0.895
2011001	10000	1	54	0.006	0.011	0	0.003	0.001	0	0	0	0.013	0	0.007	286.282	0.892
2011001	10000	1	55	0.003	0.01	0	0.003	0.001	0	0	0	0.011	0	0.007	286.157	0.893
2011001	10000	1	56	0.002	0.009	0	0.003	0.001	0	0	0	0.01	0	0.007	285.923	0.896
2011001	10000	1	57	0.002	0.008	0	0.003	0.001	0	0	0	0.01	0	0.007	285.784	0.897
2011001	10000	1	58	0.002	0.008	0	0.003	0.001	0	0	0	0.01	0	0.007	285.677	0.896
2011001	10000	1	59	0.002	0.008	0	0.002	0.001	0	0	0	0.01	0	0.006	285.479	0.901
2011001	10000	1	60	0.001	0.008	0	0.002	0.001	0	0	0	0.011	0	0.006	285.377	0.902
2011001	10000	1	61	0.002	0.009	0	0.002	0.001	0	0	0	0.011	0	0.007	285.399	0.899
2011001	10000	1	62	0.001	0.009	0	0.002	0.001	0	0	0	0.011	0	0.006	285.092	0.904
2011001	10000	1	63	0.001	0.009	0	0.002	0.001	0	0	0	0.011	0	0.007	285.005	0.905
2011001	10000	1	64	0.002	0.009	0	0.002	0.001	0	0	0	0.012	0	0.007	284.865	0.906
2011001	10000	1	65	0.002	0.009	0	0.002	0.001	0	0	0	0.012	0	0.007	284.786	0.907
2011001	10000	1	66	0.004	0.01	0	0.002	0.001	0	0	0	0.014	0	0.007	284.696	0.908
2011001	10000	1	67	0.002	0.01	0	0.002	0.001	0	0	0	0.012	0	0.007	284.579	0.91
2011001	10000	1	68	0.002	0.01	0	0.001	0	0	0	0	0.012	0	0.008	284.485	0.908
2011001	10000	1	69	0.002	0.01	0	0.001	0	0	0	0	0.012	0	0.008	284.494	0.903
2011001	10000	1	70	0.002	0.011	0	0.001	0	0	0	0	0.012	0	0.008	284.405	0.899
2011001	10000	1	71	0.002	0.011	0	0.001	0	0	0	0	0.012	0	0.008	284.301	0.9
2011001	10000	1	72	0.003	0.011	0	0.001	0	0	0	0	0.012	0	0.008	284.231	0.901
2011001	10000	1	73	0.003	0.011	0	0.001	0	0	0	0	0.012	0	0.009	284.094	0.903
2011001	10000	1	74	0.003	0.012	0	0.001	0	0	0	0	0.013	0	0.009	284.039	0.9
2011001	10000	1	75	0.003	0.012	0	0.001	0	0	0	0	0.013	0	0.009	283.912	0.904
2011001	10000	1	76	0.003	0.012	0	0.001	0	0	0	0	0.012	0	0.009	283.815	0.903
2011001	10000	1	77	0.004	0.012	0	0.001	0	0	0	0	0.012	0	0.009	283.813	0.902
2011001	10000	1	78	0.004	0.012	0	0.001	0	0	0	0	0.013	0	0.009	283.699	0.905
2011001	10000	1	79	0.004	0.013	0	0.001	0	0	0	0	0.013	0	0.009	283.61	0.908
2011001	10000	1	80	0.004	0.012	0	0.001	0	0	0	0	0.013	0	0.009	283.493	0.911
2011001	10000	1	81	0.004	0.012	0	0.001	0	0	0	0	0.013	0	0.009	283.38	0.912
2011001	10000	1	82	0.004	0.012	0	0.001	0	0	0	0	0.013	0	0.009	283.311	0.913
2011001	10000	1	83	0.004	0.013	0	0.001	0	0	0	0	0.013	0	0.009	283.212	0.914
2011001	10000	1	84	0.004	0.012	0	0.001	0	0	0	0	0.013	0	0.009	283.085	0.914
2011001	10000	1	85	0.004	0.013	0	0.001	0	0	0	0	0.013	0	0.009	282.972	0.914
2011001	10000	1	86	0.004	0.013	0	0.001	0	0	0	0	0.013	0	0.009	282.838	0.915
2011001	10000	1	87	0.004	0.013	0	0.001	0	0	0	0	0.013	0	0.009	282.671	0.916
2011001	10000	1	88	0.005	0.013	0	0.001	0	0	0	0	0.013	0	0.009	282.541	0.917
2011001	10000	1	89	0.005	0.013	0	0.001	0	0	0	0	0.012	0	0.009	282.374	0.918
2011001	10000	1	90	0.005	0.012	0	0.002	0	0	0	0	0.012	0	0.009	282.218	0.92
2011001	10000	1	91	0.005	0.012	0	0.001	0	0	0	0	0.012	0	0.009	282.022	0.923
2011001	10000	1	92	0.004	0.012	0	0.001	0	0	0	0	0.013	0	0.009	281.793	0.925
2011001	10000	1	93	0.004	0.012	0	0.001	0	0	0	0	0.013	0	0.009	281.678	0.924
2011001	10000	1	94	0.004	0.012	0	0.001	0	0	0	0	0.013	0	0.009	281.573	0.919
2011001	10000	1	95	0.004	0.012	0	0.001	0	0	0	0	0.013	0	0.009	281.408	0.918
2011001	10000	1	96	0.005	0.012	0	0.001	0	0	0	0	0.012	0	0.009	281.32	0.911
2011001	10000	1	97	0.004	0.011	0	0.002	0	0	0	0	0.012	0	0.009	281.135	0.911
2011001	10000	1	98	0.004	0.011	0	0.002	0.001	0	0	0	0.012	0	0.008	280.965	0.91
2011001	10000	1	99	0.005	0.012	0	0.002	0.001	0	0	0	0.013	0	0.008	280.846	0.91
2011001	10000	1	100	0.009	0.012	0	0.002	0.001	0	0	0	0.014	0	0.008	280.659	0.911
2011001	10000	1	101	0.01	0.012	0	0.002	0.001	0	0	0	0.015	0	0.008	280.49	0.909
2011001	10000	1	102	0.006	0.012	0	0.002	0.001	0	0	0	0.014	0	0.008	280.458	0.901
2011001	10000	1	103	0.004	0.012	0	0.002	0.001	0	0	0	0.013	0	0.008	280.298	0.897
2011001	10000	1	104	0.004	0.011	0	0.002	0.001	0	0	0	0.013	0	0.008	280.175	0.892
2011001	10000	1	105	0.005	0.011	0	0.002	0.001	0	0	0	0.013	0	0.008	280.05	0.893
2011001	10000	1	106	0.005	0.011	0	0.002	0.001	0	0	0	0.013	0	0.008	279.933	0.894
2011001	10000	1	107	0.005	0.011	0	0.002	0.001	0	0	0	0.013	0	0.008	279.788	0.895
2011001	10000	1	108	0.004	0.011	0	0.002	0.001	0	0	0	0.012	0	0.008	279.684	0.893
2011001	10000	1	109	0.004	0.011	0	0.002	0.001	0	0	0	0.012	0	0.008	279.578	0.891
2011001	10000	1	110	0.005	0.011	0	0.002	0.001	0	0	0	0.012	0	0.008	279.485	0.888
2011001	10000	1	111	0.005	0.011	0	0.002	0.001	0	0	0	0.012	0	0.008	279.371	0.887
2011001	10000	1	112	0.006	0.01	0	0.001	0	0	0	0	0.011	0	0.008	279.219	0.886
2011001	10000	2	1	0	0.003	0	0.002	0.001	0	0	0	0.006	0	0.003	292.835	0.827
2011001	10000	2	2	0	0.003	0	0.002	0.001	0	0	0	0.006	0	0.003	292.635	0.822
2011001	10000	2	3	0	0.004	0	0.002	0.001	0	0	0	0.006	0	0.003	292.45	0.822
2011001	10000	2	4	0	0.004	0	0.002	0.001	0	0	0	0.006	0	0.003	292.246	0.821
2011001	10000	2	5	0	0.004	0	0.002	0.001	0	0	0	0.006	0	0.004	292.108	0.818
2011001	10000	2	6	0	0.004	0	0.002	0.001	0	0	0	0.006	0	0.004	291.906	0.818
2011001	10000	2	7	0	0.003	0	0.002	0.001	0	0	0	0.006	0	0.004	291.703	0.82
2011001	10000	2	8	0	0.004	0	0.002	0.001	0	0	0	0.006	0	0.004	291.611	0.816
2011001	10000	2	9	0	0.004	0	0.002	0.001	0	0	0	0.006	0	0.004	291.443	0.817
2011001	10000	2	10	0	0.004	0	0.002	0.001	0	0	0	0.006	0	0.004	291.328	0.815
2011001	10000	2	11	0	0.004	0	0.002	0.001	0	0	0	0.006	0	0.004	291.192	0.816
2011001	10000	2	12	0	0.005	0	0.002	0.001	0	0	0	0.006	0	0.004	291.078	0.816
2011001	10000	2	13	0	0.005	0	0.002	0.001	0	0	0	0.006	0	0.004	290.955	0.817
2011001	10000	2	14	0	0.005	0	0.002	0.001	0	0	0	0.007	0	0.004	290.828	0.819
2011001	10000	2	15	0	0.005	0	0.002	0.001	0	0	0	0.007	0	0.004	290.66	0.828
2011001	10000	2	16	0	0.005	0	0.002	0.001	0	0	0	0.007	0	0.004	290.478	0.833
2011001	10000	2	17	0	0.006	0	0.002	0.001	0	0	0	0.007	0	0.004	290.337	0.838
2011001	10000	2	18	0	0.006	0	0.002	0.001	0	0	0	0.007	0	0.005	290.138	0.842
2011001	10000	2	19	0	0.006	0	0.002	0.001	0	0	0	0.007	0	0.005	289.993	0.843
2011001	10000	2	20	0	0.006	0	0.002	0.001	0	0	0	0.007	0	0.005	289.804	0.847
2011001	10000	2	21	0	0.006	0	0.003	0.001	0	0	0	0.008	0	0.005	289.692	0.845
2011001	10000	2	22	0.001	0.007	0	0.003	0.001	0	0	0	0.008	0	0.005	289.511	0.849
2011001	10000	2	23	0.001	0.007	0	0.003	0.001	0	0	0	0.008	0	0.006	289.39	0.846
2011001	10000	2	24	0.001	0.007	0	0.003	0.001	0	0	0	0.008	0	0.006	289.269	0.848
2011001	10000	2	25	0.001	0.007	0	0.003	0.001	0	0	0	0.008	0	0.006	289.154	0.852
2011001	10000	2	26	0.001	0.007	0	0.003	0.001	0	0	0	0.008	0	0.006	289.064	0.853
2011001	10000	2	27	0.001	0.008	0	0.003	0.001	0	0	0	0.009	0	0.006	288.952	0.854
2011001	10000	2	28	0.001	0.008	0	0.003	0.001	0	0	0	0.009	0	0.006	288.874	0.857
2011001	10000	2	29	0.001	0.008	0	0.003	0.001	0	0	0	0.009	0	0.007	288.752	0.865
2011001	10000	2	30	0.001	0.008	0	0.003	0.001	0	0	0	0.01	0	0.007	288.671	0.867
2011001	10000	2	31	0.001	0.008	0	0.004	0.001	0	0	0	0.01	0	0.007	288.583	0.871
2011001	10000	2	32	0.001	0.008	0	0.004	0.001	0	0	0	0.01	0	0.007	288.513	0.873
2011001	10000	2	33	0.001	0.008	0	0.004	0.001	0	0	0	0.01	0	0.007	288.467	0.873
2011001	10000	2	34	0.001	0.008	0	0.004	0.001	0	0	0	0.01	0	0.007	288.412	0.873
2011001	10000	2	35	0.001	0.008	0	0.004	0.001	0	0	0	0.01	0	0.007	288.326	0.875
2011001	10000	2	36	0.001	0.008	0	0.004	0.001	0	0	0	0.011	0	0.007	288.264	0.877
2011001	10000	2	37	0.001	0.009	0	0.004	0.001	0	0	0	0.011	0	0.007	288.215	0.877
2011001	10000	2	38	0.001	0.01	0	0.004	0.001	0	0	0	0.011	0	0.007	288.165	0.874
2011001	10000	2	39	0.001	0.01	0	0.004	0.001	0	0	0	0.012	0	0.007	288.125	0.872
2011001	10000	2	40	0.001	0.01	0	0.003	0.001	0	0	0	0.012	0	0.007	288.041	0.873
2011001	10000	2	41	0.001	0.009	0	0.003	0.001	0	0	0	0.011	0	0.007	287.922	0.879
2011001	10000	2	42	0.001	0.01	0	0.003	0.001	0	0	0	0.012	0	0.007	287.841	0.883
2011001	10000	2	43	0.002	0.01	0	0.004	0.001	0	0	0	0.012	0	0.007	287.689	0.888
2011001	10000	2	44	0.003	0.01	0	0.004	0.001	0	0	0	0.013	0	0.007	287.568	0.891
2011001	10000	2	45	0.005	0.01	0	0.004	0.001	0	0	0	0.014	0	0.007	287.41	0.894
2011001	10000	2	46	0.005	0.009	0	0.004	0.001	0	0	0	0.013	0	0.007	287.273	0.896
2011001	10000	2	47	0.002	0.009	0	0.004	0.001	0	0	0	0.012	0	0.007	287.134	0.894
2011001	10000	2	48	0.001	0.009	0	0.004	0.001	0	0	0	0.012	0	0.007	286.998	0.893
2011001	10000	2	49	0.001	0.01	0	0.004	0.001	0	0	0	0.012	0	0.007	286.86	0.892
2011001	10000	2	50	0.001	0.009	0	0.004	0.001	0	0	0	0.012	0	0.007	286.71	0.891
2011001	10000	2	51	0.002	0.01	0	0.004	0.001	0	0	0	0.013	0	0.007	286.576	0.893
2011001	10000	2	52	0.003	0.01	0	0.004	0.001	0	0	0	0.013	0	0.007	286.459	0.893
2011001	10000	2	53	0.005	0.01	0	0.003	0.001	0	0	0	0.013	0	0.007	286.247	0.895
2011001	10000	2	54	0.004	0.009	0	0.003	0.001	0	0	0	0.012	0	0.007	286.143	0.895
2011001	10000	2	55	0.001	0.008	0	0.003	0.001	0	0	0	0.01	0	0.007	286.005	0.896
2011001	10000	2	56	0.001	0.008	0	0.003	0.001	0	0	0	0.01	0	0.007	285.866	0.896
2011001	10000	2	57	0.001	0.007	0	0.003	0.001	0	0	0	0.01	0	0.006	285.711	0.897
2011001	10000	2	58	0.001	0.006	0	0.003	0.001	0	0	0	0.01	0	0.006	285.524	0.899
2011001	10000	2	59	0.001	0.006	0	0.003	0.001	0	0	0	0.01	0	0.006	285.406	0.9
2011001	10000	2	60	0.001	0.006	0	0.003	0.001	0	0	0	0.01	0	0.006	285.231	0.902
2011001	10000	2	61	0.001	0.007	0	0.003	0.001	0	0	0	0.01	0	0.006	285.131	0.904
2011001	10000	2	62	0.001	0.007	0	0.002	0.001	0	0	0	0.01	0	0.006	285.016	0.904
2011001	10000	2	63	0.001	0.007	0	0.002	0.001	0	0	0	0.011	0	0.006	284.921	0.902
2011001	10000	2	64	0.001	0.007	0	0.002	0.001	0	0	0	0.011	0	0.006	284.796	0.904
2011001	10000	2	65	0.003	0.007	0	0.002	0.001	0	0	0	0.012	0	0.006	284.675	0.908
2011001	10000	2	66	0.003	0.007	0	0.002	0.001	0	0	0	0.013	0	0.006	284.519	0.911
2011001	10000	2	67	0.001	0.007	0	0.002	0.001	0	0	0	0.012	0	0.007	284.422	0.914
2011001	10000	2	68	0	0.008	0	0.002	0.001	0	0	0	0.011	0	0.007	284.369	0.912
2011001	10000	2	69	0.001	0.008	0	0.002	0.001	0	0	0	0.011	0	0.007	284.245	0.911
2011001	10000	2	70	0.001	0.008	0	0.002	0.001	0	0	0	0.011	0	0.007	284.195	0.907
2011001	10000	2	71	0.001	0.008	0	0.001	0.001	0	0	0	0.011	0	0.008	284.112	0.907
2011001	10000	2	72	0.001	0.008	0	0.001	0	0	0	0	0.011	0	0.008	283.958	0.908
2011001	10000	2	73	0.001	0.009	0	0.001	0	0	0	0	0.012	0	0.008	283.897	0.908
2011001	10000	2	74	0.001	0.009	0	0.001	0	0	0	0	0.012	0	0.008	283.837	0.904
2011001	10000	2	75	0.002	0.009	0	0.001	0	0	0	0	0.012	0	0.008	283.673	0.907
2011001	10000	2	76	0.002	0.009	0	0.001	0	0	0	0	0.013	0	0.008	283.624	0.908
2011001	10000	2	77	0.002	0.009	0	0.001	0	0	0	0	0.012	0	0.008	283.5	0.908
2011001	10000	2	78	0.002	0.009	0	0.001	0	0	0	0	0.012	0	0.008	283.398	0.911
2011001	10000	2	79	0.002	0.009	0	0.001	0.001	0	0	0	0.012	0	0.008	283.375	0.91
2011001	10000	2	80	0.002	0.01	0	0.002	0.001	0	0	0	0.013	0	0.008	283.279	0.909
2011001	10000	2	81	0.002	0.009	0	0.002	0.001	0	0	0	0.013	0	0.008	283.233	0.911
2011001	10000	2	82	0.002	0.009	0	0.002	0.001	0	0	0	0.013	0	0.008	283.133	0.913
2011001	10000	2	83	0.002	0.009	0	0.002	0.001	0	0	0	0.013	0	0.008	283.025	0.914
2011001	10000	2	84	0.002	0.009	0	0.002	0.001	0	0	0	0.013	0	0.009	282.996	0.912
2011001	10000	2	85	0.003	0.009	0	0.002	0.001	0	0	0	0.013	0	0.009	282.846	0.913
2011001	10000	2	86	0.002	0.009	0	0.002	0.001	0	0	0	0.013	0	0.009	282.695	0.913
2011001	10000	2	87	0.002	0.009	0	0.002	0.001	0	0	0	0.012	0	0.009	282.559	0.916
2011001	10000	2	88	0.002	0.009	0	0.002	0.001	0	0	0	0.012	0	0.009	282.39	0.92
2011001	10000	2	89	0.003	0.009	0	0.002	0.001	0	0	0	0.012	0	0.009	282.272	0.92
2011001	10000	2	90	0.003	0.009	0	0.002	0.001	0	0	0	0.012	0	0.009	282.106	0.921
2011001	10000	2	91	0.003	0.009	0	0.002	0.001	0	0	0	0.012	0	0.009	281.963	0.92
2011001	10000	2	92	0.002	0.009	0	0.002	0.001	0	0	0	0.012	0	0.009	281.773	0.925
2011001	10000	2	93	0.003	0.009	0	0.002	0.001	0	0	0	0.013	0	0.009	281.714	0.918
2011001	10000	2	94	0.003	0.009	0	0.002	0.001	0	0	0	0.013	0	0.009	281.532	0.917
2011001	10000	2	95	0.002	0.008	0	0.002	0.001	0	0	0	0.012	0	0.008	281.368	0.912
2011001	10000	2	96	0.002	0.008	0	0.002	0.001	0	0	0	0.012	0	0.008	281.244	0.91
2011001	10000	2	97	0.002	0.008	0	0.002	0.001	0	0	0	0.012	0	0.008	281.102	0.908
2011001	10000	2	98	0.003	0.008	0	0.003	0.001	0	0	0	0.012	0	0.008	280.993	0.908
2011001	10000	2	99	0.004	0.009	0	0.003	0.001	0	0	0	0.013	0	0.008	280.804	0.91
2011001	10000	2	100	0.012	0.009	0	0.003	0.001	0	0	0	0.015	0	0.008	280.687	0.911
2011001	10000	2	101	0.006	0.009	0	0.003	0.001	0	0	0	0.015	0	0.008	280.572	0.906
2011001	10000	2	102	0.004	0.009	0	0.003	0.001	0	0	0	0.014	0	0.008	280.42	0.903
2011001	10000	2	103	0.003	0.008	0	0.003	0.001	0	0	0	0.013	0	0.007	280.315	0.899
2011001	10000	2	104	0.003	0.008	0	0.003	0.001	0	0	0	0.013	0	0.007	280.198	0.895
2011001	10000	2	105	0.003	0.008	0	0.003	0.001	0	0	0	0.013	0	0.007	280.047	0.896
2011001	10000	2	106	0.003	0.008	0	0.003	0.001	0	0	0	0.013	0	0.007	279.929	0.897
2011001	10000	2	107	0.003	0.008	0	0.002	0.001	0	0	0	0.013	0	0.007	279.842	0.897
2011001	10000	2	108	0.002	0.008	0	0.003	0.001	0	0	0	0.012	0	0.007	279.705	0.894
2011001	10000	2	109	0.003	0.008	0	0.003	0.001	0	0	0	0.012	0	0.008	279.594	0.893
2011001	10000	2	110	0.003	0.008	0	0.002	0.001	0	0	0	0.012	0	0.008	279.52	0.889
2011001	10000	2	111	0.003	0.008	0	0.002	0.001	0	0	0	0.011	0	0.008	279.396	0.886
2011001	10000	2	112	0.004	0.007	0	0.002	0.001	0	0	0	0.011	0	0.007	279.252	0.886
2011001	10000	3	1	0	0.003	0	0.002	0.001	0	0	0	0.006	0	0.003	292.691	0.829
2011001	10000	3	2	0	0.003	0	0.002	0.001	0	0	0	0.006	0	0.003	292.553	0.826
2011001	10000	3	3	0	0.003	0	0.002	0.001	0	0	0	0.006	0	0.003	292.366	0.821
2011001	10000	3	4	0	0.003	0	0.002	0.001	0	0	0	0.006	0	0.003	292.15	0.822
2011001	10000	3	5	0	0.003	0	0.002	0.001	0	0	0	0.006	0	0.003	291.941	0.823
2011001	10000	3	6	0	0.003	0	0.002	0.001	0	0	0	0.006	0	0.003	291.805	0.819
2011001	10000	3	7	0	0.003	0	0.002	0.001	0	0	0	0.006	0	0.004	291.623	0.822
2011001	10000	3	8	0	0.003	0	0.002	0.001	0	0	0	0.006	0	0.004	291.461	0.819
2011001	10000	3	9	0	0.004	0	0.002	0.001	0	0	0	0.006	0	0.004	291.36	0.816
2011001	10000	3	10	0	0.004	0	0.002	0.001	0	0	0	0.006	0	0.004	291.2	0.817
2011001	10000	3	11	0	0.004	0	0.002	0.001	0	0	0	0.006	0	0.004	291.096	0.819
2011001	10000	3	12	0	0.005	0	0.002	0.001	0	0	0	0.006	0	0.004	290.963	0.819
2011001	10000	3	13	0	0.005	0	0.002	0.001	0	0	0	0.006	0	0.004	290.844	0.82
2011001	10000	3	14	0	0.005	0	0.002	0.001	0	0	0	0.006	0	0.004	290.727	0.823
2011001	10000	3	15	0	0.005	0	0.002	0.001	0	0	0	0.007	0	0.004	290.592	0.828
2011001	10000	3	16	0	0.005	0	0.002	0.001	0	0	0	0.006	0	0.004	290.409	0.834
2011001	10000	3	17	0	0.006	0	0.002	0.001	0	0	0	0.007	0	0.004	290.23	0.84
2011001	10000	3	18	0	0.006	0	0.002	0.001	0	0	0	0.007	0	0.004	290.057	0.843
2011001	10000	3	19	0	0.006	0	0.002	0.001	0	0	0	0.007	0	0.005	289.918	0.844
2011001	10000	3	20	0	0.006	0	0.002	0.001	0	0	0	0.007	0	0.005	289.74	0.849
2011001	10000	3	21	0	0.007	0	0.002	0.001	0	0	0	0.007	0	0.005	289.599	0.846
2011001	10000	3	22	0	0.007	0	0.002	0.001	0	0	0	0.007	0	0.005	289.447	0.849
2011001	10000	3	23	0.001	0.008	0	0.003	0.001	0	0	0	0.008	0	0.005	289.33	0.849
2011001	10000	3	24	0.001	0.007	0	0.003	0.001	0	0	0	0.008	0	0.005	289.19	0.851
2011001	10000	3	25	0.001	0.007	0	0.003	0.001	0	0	0	0.008	0	0.005	289.07	0.855
2011001	10000	3	26	0.001	0.007	0	0.003	0.001	0	0	0	0.008	0	0.006	288.974	0.856
2011001	10000	3	27	0.001	0.007	0	0.003	0.001	0	0	0	0.008	0	0.006	288.878	0.857
2011001	10000	3	28	0.001	0.007	0	0.003	0.001	0	0	0	0.009	0	0.006	288.78	0.862
2011001	10000	3	29	0.001	0.008	0	0.003	0.001	0	0	0	0.009	0	0.006	288.678	0.866
2011001	10000	3	30	0	0.008	0	0.004	0.001	0	0	0	0.01	0	0.006	288.575	0.871
2011001	10000	3	31	0.001	0.008	0	0.004	0.001	0	0	0	0.01	0	0.006	288.513	0.873
2011001	10000	3	32	0.001	0.008	0	0.004	0.001	0	0	0	0.01	0	0.007	288.423	0.876
2011001	10000	3	33	0.001	0.008	0	0.004	0.001	0	0	0	0.01	0	0.006	288.366	0.877
2011001	10000	3	34	0.001	0.007	0	0.004	0.001	0	0	0	0.01	0	0.006	288.269	0.882
2011001	10000	3	35	0.001	0.007	0	0.004	0.001	0	0	0	0.01	0	0.006	288.216	0.882
2011001	10000	3	36	0.001	0.008	0	0.004	0.001	0	0	0	0.011	0	0.007	288.133	0.881
2011001	10000	3	37	0.001	0.008	0	0.004	0.001	0	0.001	0	0.011	0	0.007	288.086	0.88
2011001	10000	3	38	0.001	0.009	0	0.004	0.001	0	0.001	0	0.011	0	0.007	288.055	0.877
2011001	10000	3	39	0.001	0.01	0	0.004	0.001	0	0.001	0	0.012	0	0.007	287.991	0.878
2011001	10000	3	40	0.001	0.01	0	0.004	0.001	0	0	0	0.011	0	0.007	287.934	0.877
2011001	10000	3	41	0.001	0.009	0	0.004	0.001	0	0	0	0.011	0	0.006	287.813	0.885
2011001	10000	3	42	0.001	0.009	0	0.004	0.001	0	0	0	0.012	0	0.007	287.708	0.887
2011001	10000	3	43	0.002	0.01	0	0.004	0.001	0	0	0	0.012	0	0.007	287.599	0.89
2011001	10000	3	44	0.003	0.01	0	0.004	0.001	0	0	0	0.013	0	0.007	287.434	0.893
2011001	10000	3	45	0.005	0.01	0	0.004	0.001	0	0.001	0	0.014	0	0.007	287.336	0.894
2011001	10000	3	46	0.003	0.009	0	0.004	0.001	0	0.001	0	0.013	0	0.007	287.142	0.895
2011001	10000	3	47	0.002	0.009	0	0.004	0.001	0	0.001	0	0.012	0	0.007	286.997	0.896
2011001	10000	3	48	0.002	0.009	0	0.004	0.001	0	0.001	0	0.012	0	0.007	286.897	0.895
2011001	10000	3	49	0.002	0.009	0	0.004	0.001	0	0.001	0	0.012	0	0.006	286.681	0.896
2011001	10000	3	50	0.001	0.009	0	0.004	0.001	0	0.001	0	0.012	0	0.006	286.55	0.896
2011001	10000	3	51	0.002	0.009	0	0.004	0.001	0	0.001	0	0.012	0	0.006	286.45	0.895
2011001	10000	3	52	0.004	0.009	0	0.004	0.001	0	0	0	0.013	0	0.006	286.274	0.896
2011001	10000	3	53	0.006	0.009	0	0.004	0.001	0	0	0	0.013	0	0.006	286.13	0.897
2011001	10000	3	54	0.002	0.008	0	0.004	0.001	0	0	0	0.011	0	0.006	286.021	0.898
2011001	10000	3	55	0.001	0.008	0	0.004	0.001	0	0	0	0.01	0	0.006	285.86	0.901
2011001	10000	3	56	0.001	0.007	0	0.004	0.001	0	0	0	0.01	0	0.006	285.718	0.901
2011001	10000	3	57	0.001	0.006	0	0.004	0.001	0	0	0	0.01	0	0.006	285.498	0.902
2011001	10000	3	58	0.001	0.006	0	0.004	0.001	0	0	0	0.01	0	0.006	285.417	0.902
2011001	10000	3	59	0.001	0.005	0	0.004	0.001	0	0	0	0.01	0	0.005	285.257	0.905
2011001	10000	3	60	0.001	0.005	0	0.003	0.001	0	0	0	0.01	0	0.005	285.129	0.908
2011001	10000	3	61	0	0.005	0	0.003	0.001	0	0	0	0.01	0	0.005	285.062	0.909
2011001	10000	3	62	0	0.006	0	0.003	0.001	0	0	0	0.01	0	0.006	284.937	0.909
2011001	10000	3	63	0.001	0.006	0	0.003	0.001	0	0	0	0.01	0	0.006	284.812	0.909
2011001	10000	3	64	0.001	0.006	0	0.002	0.001	0	0	0	0.01	0	0.006	284.736	0.908
2011001	10000	3	65	0.003	0.006	0	0.002	0.001	0	0	0	0.011	0	0.006	284.595	0.91
2011001	10000	3	66	0.001	0.006	0	0.002	0.001	0	0	0	0.011	0	0.006	284.466	0.916
2011001	10000	3	67	0	0.006	0	0.002	0.001	0	0	0	0.011	0	0.006	284.371	0.916
2011001	10000	3	68	0	0.006	0	0.002	0.001	0	0	0	0.011	0	0.006	284.226	0.916
2011001	10000	3	69	0	0.006	0	0.002	0.001	0	0	0	0.011	0	0.007	284.133	0.914
2011001	10000	3	70	0.001	0.006	0	0.002	0.001	0	0	0	0.01	0	0.007	284.055	0.913
2011001	10000	3	71	0.001	0.006	0	0.002	0.001	0	0	0	0.01	0	0.007	283.871	0.914
2011001	10000	3	72	0.001	0.007	0	0.002	0.001	0	0	0	0.011	0	0.007	283.793	0.915
2011001	10000	3	73	0.001	0.007	0	0.002	0.001	0	0	0	0.011	0	0.007	283.701	0.913
2011001	10000	3	74	0.002	0.007	0	0.002	0.001	0	0	0	0.011	0	0.007	283.59	0.911
2011001	10000	3	75	0.002	0.007	0	0.002	0.001	0	0	0	0.012	0	0.007	283.555	0.91
2011001	10000	3	76	0.001	0.007	0	0.002	0.001	0	0	0	0.012	0	0.007	283.441	0.912
2011001	10000	3	77	0.001	0.007	0	0.002	0.001	0	0	0	0.011	0	0.007	283.338	0.913
2011001	10000	3	78	0.001	0.008	0	0.002	0.001	0	0	0	0.012	0	0.007	283.31	0.912
2011001	10000	3	79	0.001	0.008	0	0.002	0.001	0	0	0	0.012	0	0.008	283.226	0.91
2011001	10000	3	80	0.001	0.007	0	0.002	0.001	0	0	0	0.012	0	0.008	283.116	0.91
2011001	10000	3	81	0.001	0.007	0	0.002	0.001	0	0	0	0.012	0	0.008	283.038	0.913
2011001	10000	3	82	0.001	0.007	0	0.002	0.001	0	0	0	0.012	0	0.008	282.91	0.915
2011001	10000	3	83	0.001	0.007	0	0.002	0.001	0	0	0	0.012	0	0.008	282.917	0.911
2011001	10000	3	84	0.001	0.007	0	0.003	0.001	0	0	0	0.012	0	0.008	282.805	0.913
2011001	10000	3	85	0.002	0.007	0	0.003	0.001	0	0	0	0.012	0	0.008	282.675	0.915
2011001	10000	3	86	0.002	0.007	0	0.003	0.001	0	0	0	0.012	0	0.008	282.599	0.913
2011001	10000	3	87	0.001	0.007	0	0.003	0.001	0	0	0	0.012	0	0.008	282.404	0.917
2011001	10000	3	88	0.001	0.006	0	0.003	0.001	0	0	0	0.012	0	0.008	282.314	0.917
2011001	10000	3	89	0.001	0.006	0	0.003	0.001	0	0	0	0.012	0	0.008	282.2	0.918
2011001	10000	3	90	0.002	0.006	0	0.003	0.001	0	0	0	0.012	0	0.008	282.044	0.919
2011001	10000	3	91	0.002	0.006	0	0.003	0.001	0	0	0	0.011	0	0.008	281.909	0.92
2011001	10000	3	92	0.002	0.007	0	0.003	0.001	0	0	0	0.012	0	0.008	281.806	0.919
2011001	10000	3	93	0.002	0.006	0	0.003	0.001	0	0	0	0.012	0	0.008	281.607	0.914
2011001	10000	3	94	0.002	0.006	0	0.003	0.001	0	0	0	0.012	0	0.008	281.481	0.911
2011001	10000	3	95	0.002	0.006	0	0.003	0.001	0	0	0	0.011	0	0.007	281.312	0.912
2011001	10000	3	96	0.002	0.006	0	0.003	0.001	0	0	0	0.011	0	0.007	281.181	0.911
2011001	10000	3	97	0.002	0.007	0	0.003	0.001	0	0	0	0.012	0	0.007	281.063	0.912
2011001	10000	3	98	0.002	0.007	0	0.003	0.001	0	0	0	0.012	0	0.007	280.935	0.913
2011001	10000	3	99	0.006	0.007	0	0.003	0.001	0	0	0	0.013	0	0.007	280.822	0.912
2011001	10000	3	100	0.011	0.007	0	0.003	0.001	0	0	0	0.015	0	0.007	280.708	0.908
2011001	10000	3	101	0.005	0.007	0	0.003	0.001	0	0	0	0.014	0	0.007	280.568	0.904
2011001	10000	3	102	0.003	0.007	0	0.003	0.001	0	0	0	0.014	0	0.007	280.417	0.902
2011001	10000	3	103	0.002	0.007	0	0.003	0.001	0	0	0	0.013	0	0.007	280.288	0.901
2011001	10000	3	104	0.002	0.007	0	0.003	0.001	0	0	0	0.013	0	0.007	280.145	0.898
2011001	10000	3	105	0.002	0.007	0	0.003	0.001	0	0	0	0.012	0	0.007	280.061	0.896
2011001	10000	3	106	0.002	0.007	0	0.003	0.001	0	0	0	0.013	0	0.007	279.937	0.898
2011001	10000	3	107	0.002	0.007	0	0.003	0.001	0	0	0	0.013	0	0.007	279.8	0.896
2011001	10000	3	108	0.002	0.007	0	0.003	0.001	0	0	0	0.012	0	0.007	279.732	0.894
2011001	10000	3	109	0.002	0.006	0	0.003	0.001	0	0	0	0.012	0	0.007	279.639	0.891
2011001	10000	3	110	0.002	0.006	0	0.003	0.001	0	0	0	0.011	0	0.007	279.51	0.887
2011001	10000	3	111	0.003	0.006	0	0.003	0.001	0	0	0	0.011	0	0.007	279.4	0.884
2011001	10000	3	112	0.004	0.006	0	0.003	0.001	0	0	0	0.011	0	0.007	279.327	0.879
2011001	10000	4	1	0	0.003	0	0.002	0.001	0	0	0	0.006	0	0.003	292.556	0.832
2011001	10000	4	2	0	0.003	0	0.002	0.001	0	0	0	0.006	0	0.003	292.396	0.828
2011001	10000	4	3	0	0.003	0	0.002	0.001	0	0	0	0.006	0	0.003	292.219	0.827
2011001	10000	4	4	0	0.003	0	0.002	0.001	0	0	0	0.006	0	0.003	292.042	0.824
2011001	10000	4	5	0	0.003	0	0.002	0.001	0	0	0	0.005	0	0.003	291.854	0.822
2011001	10000	4	6	0	0.003	0	0.002	0.001	0	0	0	0.005	0	0.003	291.703	0.822
2011001	10000	4	7	0	0.003	0	0.002	0.001	0	0	0	0.005	0	0.003	291.495	0.825
2011001	10000	4	8	0	0.003	0	0.002	0.001	0	0	0	0.006	0	0.004	291.376	0.824
2011001	10000	4	9	0	0.004	0	0.002	0.001	0	0	0	0.006	0	0.004	291.239	0.821
2011001	10000	4	10	0	0.004	0	0.002	0.001	0	0	0	0.006	0	0.004	291.109	0.822
2011001	10000	4	11	0	0.004	0	0.002	0.001	0	0	0	0.006	0	0.004	290.951	0.823
2011001	10000	4	12	0	0.005	0	0.002	0.001	0	0	0	0.006	0	0.004	290.839	0.824
2011001	10000	4	13	0	0.005	0	0.002	0.001	0	0	0	0.006	0	0.004	290.726	0.824
2011001	10000	4	14	0	0.005	0	0.002	0.001	0	0	0	0.006	0	0.004	290.609	0.827
2011001	10000	4	15	0	0.006	0	0.002	0.001	0	0	0	0.006	0	0.004	290.494	0.829
2011001	10000	4	16	0	0.006	0	0.002	0.001	0	0	0	0.006	0	0.004	290.265	0.839
2011001	10000	4	17	0	0.006	0	0.002	0.001	0	0	0	0.007	0	0.004	290.143	0.84
2011001	10000	4	18	0	0.006	0	0.002	0.001	0	0	0	0.007	0	0.004	289.982	0.844
2011001	10000	4	19	0	0.007	0	0.002	0.001	0	0	0	0.007	0	0.005	289.805	0.845
2011001	10000	4	20	0	0.006	0	0.002	0.001	0	0	0	0.007	0	0.005	289.659	0.848
2011001	10000	4	21	0	0.007	0	0.002	0.001	0	0	0	0.007	0	0.005	289.524	0.847
2011001	10000	4	22	0	0.007	0	0.002	0.001	0	0	0	0.007	0	0.005	289.363	0.852
2011001	10000	4	23	0	0.007	0	0.002	0.001	0	0	0	0.007	0	0.005	289.223	0.854
2011001	10000	4	24	0	0.007	0	0.003	0.001	0	0	0	0.008	0	0.005	289.104	0.856
2011001	10000	4	25	0.001	0.007	0	0.003	0.001	0	0	0	0.008	0	0.005	289	0.857
2011001	10000	4	26	0.001	0.007	0	0.003	0.001	0	0	0	0.008	0	0.005	288.911	0.858
2011001	10000	4	27	0.001	0.007	0	0.003	0.001	0	0	0	0.009	0	0.006	288.789	0.859
2011001	10000	4	28	0	0.007	0	0.003	0.001	0	0	0	0.009	0	0.006	288.69	0.862
2011001	10000	4	29	0	0.007	0	0.003	0.001	0	0	0	0.009	0	0.006	288.594	0.868
2011001	10000	4	30	0	0.008	0	0.004	0.001	0	0	0	0.009	0	0.006	288.523	0.872
2011001	10000	4	31	0	0.008	0	0.004	0.001	0	0	0	0.01	0	0.006	288.419	0.878
2011001	10000	4	32	0.001	0.007	0	0.004	0.001	0	0	0	0.01	0	0.006	288.319	0.884
2011001	10000	4	33	0.001	0.007	0	0.004	0.001	0	0.001	0	0.01	0	0.006	288.229	0.887
2011001	10000	4	34	0	0.007	0	0.004	0.001	0	0.001	0	0.01	0	0.006	288.228	0.882
2011001	10000	4	35	0.001	0.007	0	0.004	0.001	0	0.001	0	0.01	0	0.006	288.119	0.883
2011001	10000	4	36	0.001	0.008	0	0.004	0.001	0	0.001	0	0.011	0	0.007	288.063	0.882
2011001	10000	4	37	0.001	0.008	0	0.004	0.001	0	0.001	0.001	0.011	0	0.007	288.014	0.88
2011001	10000	4	38	0.001	0.009	0	0.004	0.001	0	0.001	0.001	0.011	0	0.007	287.909	0.884
2011001	10000	4	39	0.001	0.01	0	0.004	0.002	0	0.001	0	0.011	0	0.007	287.897	0.882
2011001	10000	4	40	0.001	0.01	0	0.004	0.001	0	0.001	0	0.011	0	0.007	287.796	0.885
2011001	10000	4	41	0.001	0.009	0	0.004	0.001	0	0.001	0	0.011	0	0.006	287.668	0.89
2011001	10000	4	42	0.001	0.01	0	0.004	0.001	0	0.001	0	0.012	0	0.006	287.572	0.891
2011001	10000	4	43	0.001	0.01	0	0.004	0.001	0	0.001	0	0.012	0	0.006	287.458	0.893
2011001	10000	4	44	0.003	0.01	0	0.004	0.001	0	0.001	0	0.013	0	0.007	287.358	0.894
2011001	10000	4	45	0.005	0.01	0	0.004	0.001	0	0.001	0	0.014	0	0.007	287.189	0.897
2011001	10000	4	46	0.003	0.01	0	0.004	0.001	0	0.001	0	0.013	0	0.007	287.027	0.898
2011001	10000	4	47	0.001	0.009	0	0.004	0.001	0	0.001	0	0.012	0	0.007	286.93	0.898
2011001	10000	4	48	0.002	0.01	0	0.004	0.001	0	0.001	0	0.012	0	0.007	286.737	0.899
2011001	10000	4	49	0.002	0.01	0	0.004	0.001	0	0.001	0	0.013	0	0.007	286.63	0.9
2011001	10000	4	50	0.002	0.009	0	0.004	0.002	0	0.001	0	0.012	0	0.006	286.49	0.899
2011001	10000	4	51	0.003	0.009	0	0.004	0.002	0	0.001	0	0.012	0	0.006	286.306	0.901
2011001	10000	4	52	0.005	0.009	0	0.004	0.001	0	0.001	0	0.012	0	0.006	286.202	0.9
2011001	10000	4	53	0.005	0.009	0	0.004	0.001	0	0.001	0	0.012	0.001	0.006	286.056	0.901
2011001	10000	4	54	0.001	0.008	0	0.004	0.001	0	0.001	0	0.01	0	0.006	285.863	0.905
2011001	10000	4	55	0.001	0.008	0	0.004	0.001	0	0.001	0	0.01	0	0.006	285.737	0.906
2011001	10000	4	56	0.001	0.008	0	0.004	0.001	0	0.001	0	0.01	0	0.006	285.637	0.905
2011001	10000	4	57	0	0.007	0	0.004	0.001	0	0	0	0.009	0	0.006	285.447	0.908
2011001	10000	4	58	0	0.006	0	0.004	0.001	0	0	0	0.009	0	0.005	285.279	0.909
2011001	10000	4	59	0	0.005	0	0.004	0.001	0	0	0	0.009	0	0.005	285.161	0.91
2011001	10000	4	60	0	0.005	0	0.004	0.001	0	0	0	0.009	0	0.005	285.092	0.911
2011001	10000	4	61	0	0.005	0	0.003	0.001	0	0	0	0.009	0	0.005	284.963	0.913
2011001	10000	4	62	0	0.005	0	0.003	0.001	0	0	0	0.009	0	0.005	284.858	0.914
2011001	10000	4	63	0.001	0.005	0	0.003	0.001	0	0	0	0.009	0	0.005	284.764	0.914
2011001	10000	4	64	0.002	0.005	0	0.003	0.001	0	0	0	0.009	0	0.005	284.633	0.915
2011001	10000	4	65	0.002	0.005	0	0.003	0.001	0	0	0	0.01	0	0.005	284.542	0.916
2011001	10000	4	66	0.001	0.006	0	0.002	0.001	0	0	0	0.01	0	0.005	284.412	0.919
2011001	10000	4	67	0	0.005	0	0.002	0.001	0	0	0	0.01	0	0.006	284.25	0.92
2011001	10000	4	68	0	0.005	0	0.002	0.001	0	0	0	0.01	0	0.006	284.165	0.918
2011001	10000	4	69	0	0.005	0	0.002	0.001	0	0	0	0.01	0	0.006	284.04	0.918
2011001	10000	4	70	0	0.005	0	0.002	0.001	0	0	0	0.01	0	0.006	283.887	0.916
2011001	10000	4	71	0.001	0.006	0	0.002	0.001	0	0	0	0.01	0	0.006	283.794	0.916
2011001	10000	4	72	0.001	0.005	0	0.002	0.001	0	0	0	0.01	0	0.006	283.628	0.916
2011001	10000	4	73	0.001	0.005	0	0.002	0.001	0	0	0	0.01	0	0.006	283.486	0.918
2011001	10000	4	74	0.001	0.006	0	0.002	0.001	0	0	0	0.011	0	0.007	283.495	0.915
2011001	10000	4	75	0.001	0.006	0	0.002	0.001	0	0	0	0.011	0	0.007	283.351	0.917
2011001	10000	4	76	0.001	0.006	0	0.002	0.001	0	0	0	0.011	0	0.007	283.278	0.915
2011001	10000	4	77	0.001	0.006	0	0.002	0.001	0	0	0	0.011	0	0.007	283.265	0.914
2011001	10000	4	78	0.001	0.006	0	0.002	0.001	0	0	0	0.011	0	0.007	283.155	0.914
2011001	10000	4	79	0.001	0.006	0	0.002	0.001	0	0	0	0.011	0	0.007	283.088	0.914
2011001	10000	4	80	0.001	0.007	0	0.002	0.001	0	0	0	0.012	0	0.007	283.038	0.912
2011001	10000	4	81	0.001	0.006	0	0.002	0.001	0	0	0	0.012	0	0.007	282.864	0.915
2011001	10000	4	82	0.001	0.006	0	0.002	0.001	0	0	0	0.012	0	0.007	282.771	0.914
2011001	10000	4	83	0.001	0.006	0	0.003	0.001	0	0	0	0.011	0	0.007	282.691	0.915
2011001	10000	4	84	0.001	0.006	0	0.003	0.001	0	0	0	0.011	0	0.007	282.616	0.914
2011001	10000	4	85	0.001	0.006	0	0.003	0.001	0	0	0	0.012	0	0.007	282.506	0.914
2011001	10000	4	86	0.001	0.006	0	0.003	0.001	0	0	0	0.012	0	0.007	282.427	0.913
2011001	10000	4	87	0.001	0.005	0	0.003	0.001	0	0	0	0.011	0	0.007	282.307	0.914
2011001	10000	4	88	0.001	0.005	0	0.003	0.001	0	0	0	0.011	0	0.007	282.2	0.915
2011001	10000	4	89	0.001	0.005	0	0.003	0.001	0	0	0	0.011	0	0.007	282.055	0.917
2011001	10000	4	90	0.001	0.005	0	0.003	0.001	0	0	0	0.011	0	0.007	281.986	0.916
2011001	10000	4	91	0.001	0.005	0	0.003	0.001	0	0	0	0.011	0	0.007	281.876	0.917
2011001	10000	4	92	0.001	0.005	0	0.003	0.001	0	0	0	0.011	0	0.007	281.73	0.918
2011001	10000	4	93	0.001	0.005	0	0.003	0.001	0	0	0	0.011	0	0.007	281.59	0.914
2011001	10000	4	94	0.001	0.005	0	0.003	0.001	0	0	0	0.011	0	0.007	281.436	0.912
2011001	10000	4	95	0.001	0.005	0	0.003	0.001	0	0	0	0.011	0	0.007	281.281	0.912
2011001	10000	4	96	0.001	0.005	0	0.003	0.001	0	0	0	0.011	0	0.007	281.168	0.915
2011001	10000	4	97	0.001	0.006	0	0.003	0.001	0	0	0	0.011	0	0.007	281.035	0.915
2011001	10000	4	98	0.003	0.006	0	0.003	0.001	0	0	0	0.012	0	0.007	280.905	0.914
2011001	10000	4	99	0.01	0.006	0	0.004	0.001	0	0	0	0.013	0	0.007	280.81	0.912
2011001	10000	4	100	0.008	0.006	0	0.004	0.001	0	0	0	0.014	0	0.006	280.658	0.911
2011001	10000	4	101	0.004	0.006	0	0.004	0.001	0	0	0	0.014	0	0.006	280.519	0.909
2011001	10000	4	102	0.002	0.006	0	0.004	0.001	0	0	0	0.013	0	0.006	280.389	0.907
2011001	10000	4	103	0.002	0.006	0	0.004	0.001	0	0	0	0.013	0	0.006	280.259	0.902
2011001	10000	4	104	0.002	0.006	0	0.003	0.001	0	0	0	0.012	0	0.006	280.146	0.898
2011001	10000	4	105	0.002	0.006	0	0.003	0.001	0	0	0	0.012	0	0.006	280.065	0.896
2011001	10000	4	106	0.001	0.006	0	0.003	0.001	0	0	0	0.012	0	0.006	279.937	0.896
2011001	10000	4	107	0.001	0.006	0	0.003	0.001	0	0	0	0.012	0	0.006	279.844	0.894
2011001	10000	4	108	0.001	0.005	0	0.003	0.001	0	0	0	0.012	0	0.006	279.738	0.891
2011001	10000	4	109	0.001	0.005	0	0.003	0.001	0	0	0	0.011	0	0.006	279.633	0.889
2011001	10000	4	110	0.002	0.005	0	0.003	0.001	0	0	0	0.011	0	0.006	279.55	0.885
2011001	10000	4	111	0.002	0.005	0	0.003	0.001	0	0	0	0.011	0	0.006	279.413	0.882
2011001	10000	4	112	0.003	0.004	0	0.003	0.001	0	0	0	0.01	0	0.006	279.288	0.877
2011001	10000	5	1	0	0.003	0	0.002	0.001	0	0	0	0.006	0	0.003	292.47	0.833
2011001	10000	5	2	0	0.003	0	0.002	0.001	0	0	0	0.006	0	0.003	292.284	0.83
2011001	10000	5	3	0	0.003	0	0.002	0.001	0	0	0	0.006	0	0.003	292.117	0.827
2011001	10000	5	4	0	0.003	0	0.002	0.001	0	0	0	0.006	0	0.003	291.892	0.827
2011001	10000	5	5	0	0.003	0	0.002	0.001	0	0	0	0.006	0	0.003	291.747	0.824
2011001	10000	5	6	0	0.003	0	0.002	0.001	0	0	0	0.005	0	0.003	291.589	0.824
2011001	10000	5	7	0	0.003	0	0.002	0.001	0	0	0	0.005	0	0.003	291.391	0.827
2011001	10000	5	8	0	0.003	0	0.002	0.001	0	0	0	0.006	0	0.003	291.243	0.827
2011001	10000	5	9	0	0.004	0	0.002	0.001	0	0	0	0.006	0	0.004	291.104	0.826
2011001	10000	5	10	0	0.004	0	0.002	0.001	0	0	0	0.006	0	0.004	290.989	0.826
2011001	10000	5	11	0	0.004	0	0.002	0.001	0	0	0	0.006	0	0.004	290.849	0.827
2011001	10000	5	12	0	0.005	0	0.002	0.001	0	0	0	0.006	0	0.004	290.747	0.827
2011001	10000	5	13	0	0.005	0	0.002	0.001	0	0	0	0.006	0	0.004	290.602	0.828
2011001	10000	5	14	0	0.006	0	0.002	0.001	0	0	0	0.006	0	0.004	290.51	0.828
2011001	10000	5	15	0	0.006	0	0.002	0.001	0	0	0	0.006	0	0.004	290.403	0.83
2011001	10000	5	16	0	0.006	0	0.002	0.001	0	0	0	0.006	0	0.004	290.209	0.837
2011001	10000	5	17	0	0.006	0	0.002	0.001	0	0	0	0.007	0	0.004	290.038	0.84
2011001	10000	5	18	0	0.006	0	0.002	0.001	0	0	0	0.007	0	0.004	289.876	0.845
2011001	10000	5	19	0	0.006	0	0.002	0.001	0	0	0	0.007	0	0.004	289.712	0.849
2011001	10000	5	20	0	0.006	0	0.002	0.001	0	0	0	0.007	0	0.004	289.556	0.853
2011001	10000	5	21	0	0.006	0	0.002	0.001	0	0	0	0.007	0	0.004	289.404	0.855
2011001	10000	5	22	0	0.006	0	0.002	0.001	0	0	0	0.007	0	0.005	289.26	0.855
2011001	10000	5	23	0	0.006	0	0.002	0.001	0	0	0	0.007	0	0.005	289.094	0.86
2011001	10000	5	24	0	0.006	0	0.002	0.001	0	0	0	0.007	0	0.005	288.988	0.862
2011001	10000	5	25	0	0.006	0	0.003	0.001	0	0	0	0.007	0	0.005	288.878	0.862
2011001	10000	5	26	0	0.006	0	0.003	0.001	0	0	0	0.008	0	0.005	288.805	0.862
2011001	10000	5	27	0.001	0.006	0	0.003	0.001	0	0	0	0.008	0	0.005	288.674	0.865
2011001	10000	5	28	0	0.007	0	0.003	0.001	0	0	0	0.009	0	0.006	288.602	0.867
2011001	10000	5	29	0	0.007	0	0.003	0.001	0	0	0	0.009	0	0.006	288.505	0.867
2011001	10000	5	30	0	0.007	0	0.004	0.001	0	0	0	0.009	0	0.006	288.401	0.874
2011001	10000	5	31	0	0.007	0	0.004	0.001	0	0	0	0.009	0	0.006	288.306	0.881
2011001	10000	5	32	0	0.007	0	0.004	0.001	0	0.001	0	0.01	0	0.006	288.209	0.887
2011001	10000	5	33	0.001	0.006	0	0.004	0.001	0	0.001	0	0.01	0	0.006	288.136	0.889
2011001	10000	5	34	0	0.006	0	0.004	0.001	0	0.001	0	0.01	0	0.006	288.093	0.887
2011001	10000	5	35	0	0.007	0	0.004	0.001	0	0.001	0	0.01	0	0.006	288.057	0.884
2011001	10000	5	36	0	0.007	0	0.004	0.001	0	0.001	0.001	0.011	0	0.006	287.979	0.885
2011001	10000	5	37	0.001	0.008	0	0.004	0.001	0	0.001	0.001	0.011	0	0.007	287.889	0.887
2011001	10000	5	38	0.001	0.009	0	0.004	0.002	0	0.001	0.001	0.011	0	0.007	287.847	0.888
2011001	10000	5	39	0.001	0.01	0	0.004	0.002	0	0.001	0.001	0.012	0	0.007	287.773	0.889
2011001	10000	5	40	0.001	0.01	0	0.004	0.002	0	0.001	0.001	0.012	0	0.007	287.701	0.889
2011001	10000	5	41	0.001	0.009	0	0.004	0.002	0	0.001	0	0.012	0	0.006	287.604	0.892
2011001	10000	5	42	0.001	0.011	0	0.004	0.002	0	0.001	0	0.012	0	0.007	287.486	0.894
2011001	10000	5	43	0.001	0.01	0	0.004	0.002	0	0.001	0	0.013	0	0.006	287.377	0.896
2011001	10000	5	44	0.003	0.011	0	0.004	0.001	0	0.001	0	0.013	0	0.007	287.234	0.898
2011001	10000	5	45	0.005	0.011	0	0.004	0.001	0	0.001	0	0.014	0	0.007	287.094	0.9
2011001	10000	5	46	0.002	0.01	0	0.004	0.001	0	0.001	0	0.012	0	0.007	286.975	0.901
2011001	10000	5	47	0.001	0.01	0	0.005	0.001	0	0.001	0	0.012	0	0.007	286.801	0.904
2011001	10000	5	48	0.001	0.011	0	0.005	0.002	0	0.001	0	0.012	0	0.007	286.679	0.905
2011001	10000	5	49	0.002	0.011	0	0.005	0.001	0	0.001	0	0.013	0	0.007	286.529	0.906
2011001	10000	5	50	0.003	0.011	0	0.005	0.001	0	0.001	0	0.013	0	0.007	286.367	0.906
2011001	10000	5	51	0.004	0.012	0	0.005	0.001	0	0.001	0	0.013	0	0.006	286.282	0.904
2011001	10000	5	52	0.006	0.01	0	0.005	0.001	0	0.001	0	0.012	0	0.006	286.072	0.907
2011001	10000	5	53	0.004	0.009	0	0.005	0.001	0	0.001	0	0.011	0.001	0.006	285.87	0.91
2011001	10000	5	54	0.001	0.009	0	0.004	0.001	0	0.001	0	0.01	0.001	0.006	285.798	0.908
2011001	10000	5	55	0.001	0.009	0	0.004	0.001	0	0.001	0	0.01	0.001	0.006	285.613	0.91
2011001	10000	5	56	0.001	0.008	0	0.004	0.001	0	0.001	0	0.01	0	0.006	285.546	0.909
2011001	10000	5	57	0.001	0.007	0	0.004	0.001	0	0.001	0	0.009	0	0.006	285.356	0.91
2011001	10000	5	58	0	0.006	0	0.004	0.001	0	0.001	0	0.009	0	0.005	285.144	0.912
2011001	10000	5	59	0	0.005	0	0.004	0.001	0	0.001	0	0.009	0	0.005	285.086	0.913
2011001	10000	5	60	0	0.005	0	0.004	0.001	0	0	0	0.009	0	0.005	284.947	0.914
2011001	10000	5	61	0	0.005	0	0.004	0.001	0	0	0	0.009	0	0.005	284.847	0.916
2011001	10000	5	62	0.001	0.004	0	0.004	0.001	0	0	0	0.009	0	0.005	284.765	0.918
2011001	10000	5	63	0.001	0.005	0	0.003	0.001	0	0	0	0.009	0	0.005	284.634	0.918
2011001	10000	5	64	0.003	0.005	0	0.003	0.001	0	0	0	0.009	0	0.005	284.58	0.916
2011001	10000	5	65	0.001	0.005	0	0.003	0.001	0	0	0	0.009	0	0.005	284.439	0.919
2011001	10000	5	66	0	0.005	0	0.003	0.001	0	0	0	0.009	0	0.005	284.322	0.919
2011001	10000	5	67	0	0.005	0	0.003	0.001	0	0	0	0.009	0	0.005	284.249	0.919
2011001	10000	5	68	0	0.005	0	0.002	0.001	0	0	0	0.009	0	0.005	284.08	0.919
2011001	10000	5	69	0	0.005	0	0.002	0.001	0	0	0	0.009	0	0.006	283.941	0.919
2011001	10000	5	70	0	0.005	0	0.002	0.001	0	0	0	0.01	0	0.006	283.802	0.918
2011001	10000	5	71	0.001	0.005	0	0.002	0.001	0	0	0	0.01	0	0.006	283.637	0.917
2011001	10000	5	72	0.001	0.005	0	0.002	0.001	0	0	0	0.01	0	0.006	283.489	0.917
2011001	10000	5	73	0.001	0.005	0	0.002	0.001	0	0	0	0.01	0	0.006	283.433	0.915
2011001	10000	5	74	0.001	0.005	0	0.002	0.001	0	0	0	0.01	0	0.006	283.31	0.915
2011001	10000	5	75	0.001	0.005	0	0.002	0.001	0	0	0	0.01	0	0.006	283.216	0.917
2011001	10000	5	76	0.001	0.006	0	0.002	0.001	0	0	0	0.01	0	0.006	283.184	0.915
2011001	10000	5	77	0.001	0.006	0	0.002	0.001	0	0	0	0.01	0	0.007	283.069	0.917
2011001	10000	5	78	0.001	0.006	0	0.002	0.001	0	0	0	0.011	0	0.007	283.029	0.918
2011001	10000	5	79	0.001	0.006	0	0.002	0.001	0	0	0	0.011	0	0.007	282.985	0.916
2011001	10000	5	80	0.001	0.006	0	0.003	0.001	0	0	0	0.011	0	0.007	282.861	0.918
2011001	10000	5	81	0.001	0.006	0	0.003	0.001	0	0	0	0.011	0	0.007	282.794	0.917
2011001	10000	5	82	0.001	0.005	0	0.003	0.001	0	0	0	0.011	0	0.007	282.71	0.914
2011001	10000	5	83	0.001	0.005	0	0.003	0.001	0	0	0	0.011	0	0.007	282.585	0.916
2011001	10000	5	84	0.001	0.005	0	0.003	0.001	0	0	0	0.011	0	0.007	282.505	0.915
2011001	10000	5	85	0.001	0.005	0	0.003	0.001	0	0	0	0.011	0	0.007	282.421	0.913
2011001	10000	5	86	0.001	0.005	0	0.003	0.001	0	0	0	0.011	0	0.007	282.295	0.912
2011001	10000	5	87	0.001	0.005	0	0.003	0.001	0	0	0	0.011	0	0.007	282.215	0.913
2011001	10000	5	88	0.001	0.004	0	0.003	0.001	0	0	0	0.011	0	0.007	282.112	0.913
2011001	10000	5	89	0.001	0.004	0	0.003	0.001	0	0	0	0.011	0	0.007	281.965	0.915
2011001	10000	5	90	0.001	0.004	0	0.003	0.001	0	0	0	0.01	0	0.006	281.847	0.918
2011001	10000	5	91	0.001	0.004	0	0.003	0.001	0	0	0	0.01	0	0.006	281.734	0.918
2011001	10000	5	92	0.001	0.004	0	0.003	0.001	0	0	0	0.01	0	0.006	281.609	0.915
2011001	10000	5	93	0.001	0.004	0	0.004	0.001	0	0	0	0.011	0	0.007	281.523	0.915
2011001	10000	5	94	0.001	0.004	0	0.004	0.001	0	0	0	0.011	0	0.006	281.341	0.918
2011001	10000	5	95	0.001	0.005	0	0.003	0.001	0	0	0	0.01	0	0.006	281.241	0.918
2011001	10000	5	96	0.001	0.005	0	0.003	0.001	0	0	0	0.01	0	0.006	281.088	0.918
2011001	10000	5	97	0.001	0.005	0	0.004	0.001	0	0	0	0.011	0	0.006	280.892	0.918
2011001	10000	5	98	0.003	0.006	0	0.004	0.001	0	0	0	0.012	0	0.006	280.891	0.914
2011001	10000	5	99	0.008	0.006	0	0.004	0.001	0	0	0	0.013	0	0.006	280.739	0.912
2011001	10000	5	100	0.005	0.006	0	0.004	0.001	0	0	0	0.013	0	0.006	280.578	0.91
2011001	10000	5	101	0.003	0.006	0	0.004	0.001	0	0	0	0.013	0	0.006	280.503	0.907
2011001	10000	5	102	0.002	0.005	0	0.004	0.001	0	0	0	0.013	0	0.006	280.366	0.903
2011001	10000	5	103	0.002	0.005	0	0.004	0.001	0	0	0	0.012	0	0.006	280.229	0.898
2011001	10000	5	104	0.002	0.005	0	0.004	0.001	0	0	0	0.012	0	0.006	280.161	0.894
2011001	10000	5	105	0.001	0.005	0	0.004	0.001	0	0	0	0.012	0	0.006	280.032	0.891
2011001	10000	5	106	0.001	0.005	0	0.004	0.001	0	0	0	0.012	0	0.006	279.92	0.891
2011001	10000	5	107	0.001	0.005	0	0.004	0.001	0	0	0	0.012	0	0.006	279.847	0.889
2011001	10000	5	108	0.001	0.005	0	0.004	0.001	0	0	0	0.012	0	0.006	279.748	0.887
2011001	10000	5	109	0.001	0.004	0	0.004	0.001	0	0	0	0.011	0	0.006	279.647	0.886
2011001	10000	5	110	0.001	0.004	0	0.004	0.001	0	0	0	0.011	0	0.006	279.524	0.881
2011001	10000	5	111	0.002	0.004	0	0.004	0.001	0	0	0	0.011	0	0.006	279.442	0.875
2011001	10000	5	112	0.003	0.004	0	0.003	0.001	0	0	0	0.01	0	0.006	279.351	0.872
2011001	10000	6	1	0	0.003	0	0.002	0.001	0	0	0	0.006	0	0.003	292.357	0.833
2011001	10000	6	2	0	0.003	0	0.002	0.001	0	0	0	0.006	0	0.003	292.175	0.831
2011001	10000	6	3	0	0.003	0	0.002	0.001	0	0	0	0.006	0	0.003	291.976	0.828
2011001	10000	6	4	0	0.003	0	0.002	0.001	0	0	0	0.006	0	0.003	291.821	0.828
2011001	10000	6	5	0	0.003	0	0.002	0.001	0	0	0	0.006	0	0.003	291.625	0.827
2011001	10000	6	6	0	0.003	0	0.002	0.001	0	0	0	0.005	0	0.003	291.501	0.825
2011001	10000	6	7	0	0.003	0	0.002	0.001	0	0	0	0.005	0	0.003	291.301	0.828
2011001	10000	6	8	0	0.003	0	0.002	0.001	0	0	0	0.005	0	0.003	291.179	0.825
2011001	10000	6	9	0	0.004	0	0.002	0.001	0	0	0	0.006	0	0.004	291.021	0.828
2011001	10000	6	10	0	0.004	0	0.002	0.001	0	0	0	0.006	0	0.004	290.89	0.828
2011001	10000	6	11	0	0.005	0	0.002	0.001	0	0	0	0.006	0	0.004	290.763	0.829
2011001	10000	6	12	0	0.005	0	0.002	0.001	0	0	0	0.006	0	0.004	290.613	0.83
2011001	10000	6	13	0	0.006	0	0.002	0.001	0	0	0	0.006	0	0.004	290.523	0.83
2011001	10000	6	14	0	0.006	0	0.002	0.001	0	0	0	0.006	0	0.004	290.41	0.83
2011001	10000	6	15	0	0.006	0	0.002	0.001	0	0	0	0.006	0	0.004	290.289	0.832
2011001	10000	6	16	0	0.006	0	0.002	0.001	0	0	0	0.006	0	0.004	290.097	0.838
2011001	10000	6	17	0	0.006	0	0.002	0.001	0	0	0	0.007	0	0.004	289.945	0.842
2011001	10000	6	18	0	0.006	0	0.002	0.001	0	0	0	0.007	0	0.004	289.797	0.846
2011001	10000	6	19	0	0.006	0	0.002	0.001	0	0	0	0.007	0	0.004	289.624	0.85
2011001	10000	6	20	0	0.006	0	0.002	0.001	0	0	0	0.007	0	0.004	289.484	0.854
2011001	10000	6	21	0	0.006	0	0.002	0.001	0	0	0	0.007	0	0.005	289.313	0.856
2011001	10000	6	22	0	0.006	0	0.002	0.001	0	0	0	0.007	0	0.005	289.187	0.858
2011001	10000	6	23	0	0.006	0	0.002	0.001	0	0	0	0.007	0	0.005	289.04	0.863
2011001	10000	6	24	0	0.006	0	0.002	0.001	0	0	0	0.007	0	0.004	288.867	0.867
2011001	10000	6	25	0	0.005	0	0.003	0.001	0	0	0	0.007	0	0.005	288.782	0.868
2011001	10000	6	26	0	0.006	0	0.003	0.001	0	0	0	0.008	0	0.005	288.655	0.869
2011001	10000	6	27	0	0.006	0	0.003	0.001	0	0	0	0.008	0	0.005	288.589	0.871
2011001	10000	6	28	0	0.006	0	0.003	0.001	0	0	0	0.009	0	0.005	288.469	0.872
2011001	10000	6	29	0	0.006	0	0.003	0.001	0	0	0	0.009	0	0.006	288.38	0.874
2011001	10000	6	30	0	0.007	0	0.004	0.001	0	0	0	0.009	0	0.006	288.312	0.877
2011001	10000	6	31	0	0.006	0	0.004	0.001	0	0	0	0.009	0	0.006	288.177	0.884
2011001	10000	6	32	0	0.006	0	0.004	0.001	0	0.001	0	0.01	0	0.006	288.097	0.89
2011001	10000	6	33	0	0.006	0	0.004	0.001	0	0.001	0	0.01	0	0.006	288.035	0.892
2011001	10000	6	34	0	0.006	0	0.004	0.001	0	0.001	0	0.01	0	0.006	287.994	0.891
2011001	10000	6	35	0	0.007	0	0.004	0.001	0	0.001	0.001	0.01	0	0.006	287.934	0.892
2011001	10000	6	36	0	0.007	0	0.004	0.002	0	0.001	0.001	0.011	0	0.006	287.883	0.889
2011001	10000	6	37	0.001	0.008	0	0.005	0.002	0	0.001	0.001	0.011	0.001	0.006	287.844	0.889
2011001	10000	6	38	0.001	0.009	0	0.005	0.002	0	0.001	0.001	0.011	0.001	0.006	287.764	0.889
2011001	10000	6	39	0.001	0.01	0	0.005	0.002	0	0.001	0.001	0.012	0.001	0.007	287.696	0.891
2011001	10000	6	40	0.001	0.012	0	0.005	0.002	0	0.001	0.001	0.012	0.001	0.007	287.67	0.891
2011001	10000	6	41	0.001	0.012	0	0.005	0.002	0	0.001	0.001	0.012	0.001	0.007	287.518	0.895
2011001	10000	6	42	0.001	0.013	0	0.005	0.002	0	0.001	0.001	0.012	0.001	0.007	287.383	0.899
2011001	10000	6	43	0.001	0.012	0	0.005	0.002	0	0.001	0.001	0.013	0.001	0.007	287.275	0.9
2011001	10000	6	44	0.003	0.012	0	0.005	0.002	0	0.001	0.001	0.013	0.001	0.007	287.179	0.901
2011001	10000	6	45	0.005	0.012	0	0.005	0.002	0	0.001	0.001	0.014	0	0.007	287.064	0.903
2011001	10000	6	46	0.002	0.011	0	0.005	0.002	0	0.001	0.001	0.012	0	0.007	286.912	0.903
2011001	10000	6	47	0.001	0.01	0	0.005	0.001	0	0.001	0.001	0.011	0	0.006	286.745	0.909
2011001	10000	6	48	0.001	0.012	0	0.005	0.001	0	0.001	0.001	0.012	0.001	0.007	286.626	0.908
2011001	10000	6	49	0.001	0.012	0	0.005	0.001	0	0.001	0.001	0.012	0.001	0.007	286.443	0.909
2011001	10000	6	50	0.002	0.013	0	0.005	0.001	0	0.001	0.001	0.012	0.001	0.007	286.346	0.908
2011001	10000	6	51	0.003	0.013	0	0.005	0.001	0	0.001	0.001	0.012	0.001	0.006	286.147	0.909
2011001	10000	6	52	0.005	0.012	0	0.005	0.001	0	0.001	0.001	0.012	0.001	0.006	285.962	0.91
2011001	10000	6	53	0.002	0.011	0	0.005	0.001	0	0.001	0	0.01	0.001	0.006	285.852	0.911
2011001	10000	6	54	0.002	0.011	0	0.005	0.001	0	0.001	0	0.01	0.001	0.006	285.623	0.914
2011001	10000	6	55	0.001	0.011	0	0.004	0.001	0	0.001	0	0.01	0.001	0.006	285.492	0.914
2011001	10000	6	56	0.001	0.01	0	0.004	0.001	0	0.001	0	0.01	0.001	0.006	285.389	0.912
2011001	10000	6	57	0.001	0.009	0	0.004	0.001	0	0.001	0	0.009	0.001	0.006	285.255	0.912
2011001	10000	6	58	0.001	0.007	0	0.004	0.001	0	0.001	0	0.009	0	0.005	285.096	0.914
2011001	10000	6	59	0.001	0.006	0	0.004	0.001	0	0.001	0	0.009	0	0.005	284.925	0.916
2011001	10000	6	60	0.001	0.005	0	0.004	0.001	0	0.001	0	0.009	0	0.005	284.828	0.916
2011001	10000	6	61	0.001	0.005	0	0.004	0.001	0	0	0	0.009	0	0.005	284.768	0.917
2011001	10000	6	62	0.001	0.005	0	0.004	0.001	0	0	0	0.009	0	0.005	284.618	0.918
2011001	10000	6	63	0.002	0.005	0	0.004	0.001	0	0	0	0.009	0	0.005	284.556	0.919
2011001	10000	6	64	0.002	0.005	0	0.003	0.001	0	0	0	0.009	0	0.004	284.443	0.922
2011001	10000	6	65	0	0.005	0	0.003	0.001	0	0	0	0.009	0	0.004	284.313	0.922
2011001	10000	6	66	0	0.004	0	0.003	0.001	0	0	0	0.008	0	0.005	284.236	0.922
2011001	10000	6	67	0	0.004	0	0.003	0.001	0	0	0	0.009	0	0.005	284.119	0.922
2011001	10000	6	68	0	0.004	0	0.003	0.001	0	0	0	0.009	0	0.005	283.986	0.921
2011001	10000	6	69	0	0.004	0	0.003	0.001	0	0	0	0.009	0	0.005	283.875	0.922
2011001	10000	6	70	0.001	0.004	0	0.003	0.001	0	0	0	0.009	0	0.005	283.691	0.921
2011001	10000	6	71	0	0.004	0	0.002	0.001	0	0	0	0.009	0	0.005	283.529	0.919
2011001	10000	6	72	0	0.004	0	0.002	0.001	0	0	0	0.009	0	0.006	283.41	0.919
2011001	10000	6	73	0	0.004	0	0.002	0.001	0	0	0	0.009	0	0.006	283.305	0.917
2011001	10000	6	74	0	0.005	0	0.002	0.001	0	0	0	0.01	0	0.006	283.229	0.915
2011001	10000	6	75	0	0.005	0	0.002	0.001	0	0	0	0.01	0	0.006	283.173	0.916
2011001	10000	6	76	0	0.005	0	0.002	0.001	0	0	0	0.01	0	0.006	283.033	0.918
2011001	10000	6	77	0.001	0.005	0	0.002	0.001	0	0	0	0.01	0	0.006	282.986	0.917
2011001	10000	6	78	0.001	0.005	0	0.003	0.001	0	0	0	0.01	0	0.006	282.935	0.917
2011001	10000	6	79	0.001	0.005	0	0.003	0.001	0	0	0	0.01	0	0.007	282.842	0.917
2011001	10000	6	80	0.001	0.005	0	0.003	0.001	0	0	0	0.011	0	0.007	282.803	0.917
2011001	10000	6	81	0.001	0.005	0	0.003	0.001	0	0	0	0.011	0	0.007	282.697	0.917
2011001	10000	6	82	0.001	0.005	0	0.003	0.001	0	0	0	0.011	0	0.007	282.52	0.918
2011001	10000	6	83	0.001	0.004	0	0.003	0.001	0	0	0	0.011	0	0.007	282.464	0.918
2011001	10000	6	84	0.001	0.004	0	0.003	0.001	0	0	0	0.011	0	0.007	282.375	0.918
2011001	10000	6	85	0.001	0.004	0	0.003	0.001	0	0	0	0.011	0	0.007	282.268	0.916
2011001	10000	6	86	0.001	0.004	0	0.003	0.001	0	0	0	0.011	0	0.007	282.202	0.914
2011001	10000	6	87	0.001	0.004	0	0.004	0.001	0	0	0	0.011	0	0.006	282.1	0.914
2011001	10000	6	88	0.001	0.004	0	0.004	0.001	0	0	0	0.011	0	0.006	282.013	0.916
2011001	10000	6	89	0.001	0.004	0	0.004	0.001	0	0	0	0.011	0	0.006	281.962	0.914
2011001	10000	6	90	0.001	0.004	0	0.004	0.001	0	0	0	0.01	0	0.006	281.816	0.916
2011001	10000	6	91	0.001	0.004	0	0.004	0.001	0	0	0	0.01	0	0.006	281.656	0.918
2011001	10000	6	92	0.001	0.004	0	0.004	0.001	0	0	0	0.01	0	0.006	281.569	0.918
2011001	10000	6	93	0.001	0.004	0	0.004	0.001	0	0	0	0.01	0	0.006	281.453	0.919
2011001	10000	6	94	0.001	0.004	0	0.004	0.001	0	0	0	0.011	0	0.006	281.33	0.92
2011001	10000	6	95	0.001	0.004	0	0.004	0.001	0	0	0	0.01	0	0.006	281.215	0.921
2011001	10000	6	96	0.001	0.004	0	0.004	0.001	0	0	0	0.01	0	0.006	281.025	0.92
2011001	10000	6	97	0.002	0.005	0	0.004	0.001	0	0	0	0.011	0	0.006	280.974	0.917
2011001	10000	6	98	0.005	0.005	0	0.004	0.001	0	0.001	0	0.012	0	0.006	280.83	0.913
2011001	10000	6	99	0.006	0.005	0	0.004	0.001	0	0.001	0	0.013	0	0.006	280.69	0.909
2011001	10000	6	100	0.004	0.005	0	0.004	0.001	0	0.001	0	0.013	0	0.006	280.569	0.908
2011001	10000	6	101	0.003	0.005	0	0.004	0.001	0	0.001	0	0.012	0	0.006	280.421	0.904
2011001	10000	6	102	0.003	0.005	0	0.004	0.001	0	0.001	0	0.012	0	0.005	280.313	0.899
2011001	10000	6	103	0.002	0.005	0	0.004	0.001	0	0	0	0.012	0	0.005	280.225	0.896
2011001	10000	6	104	0.001	0.005	0	0.004	0.001	0	0	0	0.012	0	0.005	280.118	0.891
2011001	10000	6	105	0.001	0.004	0	0.004	0.001	0	0	0	0.012	0	0.006	279.993	0.888
2011001	10000	6	106	0.001	0.004	0	0.004	0.001	0	0	0	0.012	0	0.006	279.922	0.885
2011001	10000	6	107	0.001	0.004	0	0.004	0.001	0	0	0	0.012	0	0.006	279.829	0.883
2011001	10000	6	108	0.001	0.004	0	0.004	0.001	0	0	0	0.011	0	0.006	279.747	0.881
2011001	10000	6	109	0.001	0.004	0	0.004	0.001	0	0	0	0.011	0	0.006	279.655	0.879
2011001	10000	6	110	0.001	0.004	0	0.004	0.001	0	0	0	0.011	0	0.006	279.548	0.874
2011001	10000	6	111	0.002	0.003	0	0.004	0.001	0	0	0	0.011	0	0.006	279.444	0.871
2011001	10000	6	112	0.003	0.003	0	0.004	0.001	0	0	0	0.01	0	0.005	279.427	0.868
2011001	10000	7	1	0	0.003	0	0.002	0.001	0	0	0	0.006	0	0.003	292.268	0.831
2011001	10000	7	2	0	0.003	0	0.002	0.001	0	0	0	0.006	0	0.003	292.07	0.829
2011001	10000	7	3	0	0.003	0	0.002	0.001	0	0	0	0.006	0	0.003	291.88	0.829
2011001	10000	7	4	0	0.003	0	0.002	0.001	0	0	0	0.006	0	0.003	291.649	0.831
2011001	10000	7	5	0	0.003	0	0.002	0.001	0	0	0	0.006	0	0.003	291.501	0.83
2011001	10000	7	6	0	0.003	0	0.002	0.001	0	0	0	0.006	0	0.003	291.355	0.829
2011001	10000	7	7	0	0.003	0	0.002	0.001	0	0	0	0.005	0	0.003	291.209	0.829
2011001	10000	7	8	0	0.003	0	0.001	0.001	0	0	0	0.005	0	0.003	291.054	0.829
2011001	10000	7	9	0	0.004	0	0.001	0.001	0	0	0	0.006	0	0.004	290.894	0.829
2011001	10000	7	10	0	0.004	0	0.002	0.001	0	0	0	0.006	0	0.004	290.805	0.829
2011001	10000	7	11	0	0.004	0	0.002	0.001	0	0	0	0.006	0	0.004	290.665	0.831
2011001	10000	7	12	0	0.005	0	0.002	0.001	0	0	0	0.006	0	0.004	290.549	0.831
2011001	10000	7	13	0	0.006	0	0.002	0.001	0	0	0	0.006	0	0.004	290.424	0.832
2011001	10000	7	14	0	0.006	0	0.002	0.001	0	0	0	0.006	0	0.004	290.305	0.831
2011001	10000	7	15	0	0.006	0	0.002	0.001	0	0	0	0.006	0	0.004	290.186	0.833
2011001	10000	7	16	0	0.006	0	0.002	0.001	0	0	0	0.006	0	0.004	289.983	0.84
2011001	10000	7	17	0	0.006	0	0.002	0.001	0	0	0	0.006	0	0.004	289.873	0.843
2011001	10000	7	18	0	0.006	0	0.002	0.001	0	0	0	0.007	0	0.004	289.651	0.851
2011001	10000	7	19	0	0.006	0	0.002	0.001	0	0	0	0.007	0	0.004	289.522	0.854
2011001	10000	7	20	0	0.005	0	0.002	0.001	0	0	0	0.007	0	0.004	289.326	0.861
2011001	10000	7	21	0	0.006	0	0.002	0.001	0	0	0	0.007	0	0.005	289.226	0.861
2011001	10000	7	22	0	0.006	0	0.002	0.001	0	0	0	0.007	0	0.005	289.053	0.864
2011001	10000	7	23	0	0.006	0	0.002	0.001	0	0	0	0.007	0	0.005	288.907	0.867
2011001	10000	7	24	0	0.006	0	0.002	0.001	0	0	0	0.007	0	0.005	288.797	0.869
2011001	10000	7	25	0	0.006	0	0.003	0.001	0	0	0	0.007	0	0.005	288.622	0.874
2011001	10000	7	26	0	0.006	0	0.003	0.001	0	0	0	0.008	0	0.005	288.518	0.874
2011001	10000	7	27	0	0.006	0	0.003	0.001	0	0	0	0.008	0	0.005	288.425	0.877
2011001	10000	7	28	0	0.006	0	0.003	0.001	0	0	0	0.009	0	0.005	288.336	0.878
2011001	10000	7	29	0	0.006	0	0.003	0.001	0	0	0	0.009	0	0.005	288.262	0.881
2011001	10000	7	30	0	0.006	0	0.004	0.001	0	0	0	0.009	0	0.005	288.14	0.885
2011001	10000	7	31	0	0.005	0	0.004	0.001	0	0.001	0	0.009	0	0.005	288.08	0.889
2011001	10000	7	32	0	0.005	0	0.004	0.001	0	0.001	0	0.01	0	0.005	288.004	0.891
2011001	10000	7	33	0	0.006	0	0.004	0.001	0	0.001	0	0.01	0	0.006	287.931	0.892
2011001	10000	7	34	0.001	0.006	0	0.004	0.001	0	0.001	0.001	0.01	0	0.006	287.9	0.892
2011001	10000	7	35	0	0.007	0	0.005	0.002	0	0.001	0.001	0.011	0	0.006	287.819	0.893
2011001	10000	7	36	0	0.008	0	0.005	0.002	0	0.001	0.001	0.011	0.001	0.006	287.813	0.889
2011001	10000	7	37	0.001	0.008	0	0.005	0.002	0	0.001	0.001	0.011	0.001	0.006	287.741	0.89
2011001	10000	7	38	0.001	0.009	0	0.005	0.002	0	0.001	0.001	0.011	0.001	0.006	287.67	0.893
2011001	10000	7	39	0.001	0.011	0	0.005	0.002	0	0.001	0.001	0.012	0.001	0.007	287.665	0.892
2011001	10000	7	40	0.001	0.014	0	0.005	0.002	0	0.001	0.001	0.012	0.001	0.007	287.605	0.892
2011001	10000	7	41	0.001	0.015	0	0.005	0.002	0	0.001	0.001	0.012	0.001	0.007	287.508	0.896
2011001	10000	7	42	0.001	0.016	0	0.005	0.002	0	0.001	0.001	0.013	0.001	0.007	287.386	0.897
2011001	10000	7	43	0.002	0.013	0	0.005	0.002	0	0.001	0.001	0.013	0.001	0.006	287.236	0.9
2011001	10000	7	44	0.003	0.013	0	0.005	0.002	0	0.001	0.001	0.013	0.001	0.006	287.167	0.9
2011001	10000	7	45	0.005	0.012	0	0.005	0.002	0	0.001	0.001	0.013	0.001	0.006	286.97	0.904
2011001	10000	7	46	0.002	0.011	0	0.005	0.002	0	0.001	0.001	0.011	0.001	0.007	286.875	0.904
2011001	10000	7	47	0.001	0.012	0	0.005	0.002	0	0.001	0.001	0.011	0.001	0.007	286.701	0.907
2011001	10000	7	48	0.001	0.012	0	0.005	0.002	0	0.001	0.001	0.011	0.001	0.007	286.508	0.911
2011001	10000	7	49	0.002	0.014	0	0.005	0.002	0	0.001	0.001	0.012	0.001	0.007	286.424	0.91
2011001	10000	7	50	0.002	0.014	0	0.005	0.002	0	0.001	0.001	0.012	0.001	0.007	286.232	0.91
2011001	10000	7	51	0.003	0.014	0	0.005	0.002	0	0.001	0.001	0.011	0.001	0.007	286.048	0.911
2011001	10000	7	52	0.004	0.013	0	0.005	0.001	0	0.001	0.001	0.011	0.001	0.006	285.966	0.911
2011001	10000	7	53	0.002	0.012	0	0.005	0.001	0	0.001	0.001	0.01	0.001	0.006	285.741	0.914
2011001	10000	7	54	0.002	0.013	0	0.005	0.001	0	0.001	0.001	0.01	0.001	0.006	285.577	0.914
2011001	10000	7	55	0.002	0.014	0	0.005	0.001	0	0.001	0.001	0.01	0.001	0.007	285.429	0.913
2011001	10000	7	56	0.002	0.012	0	0.005	0.001	0	0.001	0	0.01	0.001	0.006	285.205	0.913
2011001	10000	7	57	0.001	0.01	0	0.005	0.001	0	0.001	0	0.01	0.001	0.006	285.145	0.912
2011001	10000	7	58	0.001	0.008	0	0.005	0.001	0	0.001	0	0.01	0	0.006	284.966	0.913
2011001	10000	7	59	0.001	0.006	0	0.004	0.001	0	0.001	0	0.009	0	0.005	284.869	0.915
2011001	10000	7	60	0.001	0.006	0	0.004	0.001	0	0.001	0	0.009	0	0.005	284.746	0.916
2011001	10000	7	61	0.001	0.005	0	0.004	0.001	0	0.001	0	0.009	0	0.005	284.601	0.918
2011001	10000	7	62	0.002	0.005	0	0.004	0.001	0	0	0	0.009	0	0.005	284.586	0.918
2011001	10000	7	63	0.003	0.006	0	0.004	0.001	0	0	0	0.009	0	0.004	284.463	0.92
2011001	10000	7	64	0.001	0.005	0	0.004	0.001	0	0	0	0.008	0	0.004	284.349	0.922
2011001	10000	7	65	0	0.004	0	0.003	0.001	0	0	0	0.008	0	0.004	284.277	0.92
2011001	10000	7	66	0	0.004	0	0.003	0.001	0	0	0	0.008	0	0.004	284.142	0.922
2011001	10000	7	67	0	0.004	0	0.003	0.001	0	0	0	0.008	0	0.004	284.002	0.922
2011001	10000	7	68	0.001	0.004	0	0.003	0.001	0	0	0	0.008	0	0.005	283.939	0.92
2011001	10000	7	69	0.001	0.004	0	0.003	0.001	0	0	0	0.008	0	0.005	283.7	0.921
2011001	10000	7	70	0	0.004	0	0.003	0.001	0	0	0	0.008	0	0.005	283.61	0.922
2011001	10000	7	71	0	0.004	0	0.003	0.001	0	0	0	0.008	0	0.005	283.457	0.92
2011001	10000	7	72	0	0.004	0	0.003	0.001	0	0	0	0.009	0	0.005	283.293	0.918
2011001	10000	7	73	0	0.004	0	0.003	0.001	0	0	0	0.009	0	0.006	283.247	0.916
2011001	10000	7	74	0	0.004	0	0.003	0.001	0	0	0	0.009	0	0.006	283.184	0.912
2011001	10000	7	75	0	0.004	0	0.003	0.001	0	0	0	0.01	0	0.006	283.072	0.912
2011001	10000	7	76	0	0.004	0	0.003	0.001	0	0	0	0.01	0	0.006	282.986	0.914
2011001	10000	7	77	0	0.005	0	0.003	0.001	0	0	0	0.01	0	0.006	282.936	0.914
2011001	10000	7	78	0	0.005	0	0.003	0.001	0	0	0	0.01	0	0.006	282.834	0.915
2011001	10000	7	79	0.001	0.005	0	0.003	0.001	0	0	0	0.01	0	0.006	282.781	0.914
2011001	10000	7	80	0.001	0.005	0	0.003	0.001	0	0	0	0.01	0	0.006	282.668	0.918
2011001	10000	7	81	0.001	0.005	0	0.003	0.001	0	0	0	0.01	0	0.006	282.552	0.92
2011001	10000	7	82	0.001	0.005	0	0.003	0.001	0	0	0	0.011	0	0.007	282.5	0.92
2011001	10000	7	83	0.001	0.004	0	0.003	0.001	0	0	0	0.011	0	0.007	282.357	0.919
2011001	10000	7	84	0.001	0.004	0	0.004	0.001	0	0	0	0.011	0	0.007	282.263	0.919
2011001	10000	7	85	0.001	0.004	0	0.004	0.001	0	0	0	0.01	0	0.006	282.197	0.919
2011001	10000	7	86	0.001	0.004	0	0.004	0.001	0	0	0	0.01	0	0.006	282.091	0.919
2011001	10000	7	87	0.001	0.004	0	0.004	0.001	0	0	0	0.011	0	0.006	282.015	0.918
2011001	10000	7	88	0.001	0.004	0	0.004	0.001	0	0	0	0.011	0	0.006	281.968	0.915
2011001	10000	7	89	0.001	0.003	0	0.004	0.001	0	0	0	0.01	0	0.006	281.851	0.916
2011001	10000	7	90	0.001	0.003	0	0.004	0.001	0	0	0	0.01	0	0.006	281.76	0.917
2011001	10000	7	91	0.001	0.003	0	0.004	0.001	0	0	0	0.01	0	0.006	281.663	0.918
2011001	10000	7	92	0.001	0.003	0	0.004	0.001	0	0	0	0.01	0	0.006	281.518	0.922
2011001	10000	7	93	0.001	0.003	0	0.004	0.001	0	0	0	0.01	0	0.006	281.424	0.923
2011001	10000	7	94	0.001	0.004	0	0.004	0.001	0	0	0	0.01	0	0.006	281.297	0.927
2011001	10000	7	95	0.001	0.004	0	0.004	0.001	0	0	0	0.01	0	0.006	281.125	0.923
2011001	10000	7	96	0.001	0.004	0	0.004	0.001	0	0.001	0	0.011	0	0.006	281.041	0.922
2011001	10000	7	97	0.002	0.005	0	0.004	0.001	0	0.001	0	0.011	0	0.006	280.951	0.917
2011001	10000	7	98	0.007	0.005	0	0.004	0.001	0	0.001	0	0.012	0	0.006	280.773	0.912
2011001	10000	7	99	0.005	0.005	0	0.004	0.001	0	0.001	0	0.012	0	0.006	280.669	0.908
2011001	10000	7	100	0.003	0.005	0	0.005	0.001	0	0.001	0	0.012	0	0.005	280.515	0.904
2011001	10000	7	101	0.003	0.005	0	0.004	0.001	0	0.001	0	0.012	0	0.005	280.41	0.899
2011001	10000	7	102	0.003	0.004	0	0.004	0.001	0	0.001	0	0.012	0	0.005	280.309	0.895
2011001	10000	7	103	0.002	0.004	0	0.004	0.001	0	0.001	0	0.012	0	0.005	280.196	0.892
2011001	10000	7	104	0.001	0.004	0	0.004	0.001	0	0.001	0	0.012	0	0.005	280.109	0.886
2011001	10000	7	105	0.001	0.004	0	0.004	0.001	0	0.001	0	0.011	0	0.005	280.014	0.883
2011001	10000	7	106	0.001	0.004	0	0.004	0.001	0	0.001	0	0.011	0	0.005	279.905	0.88
2011001	10000	7	107	0.001	0.004	0	0.004	0.001	0	0.001	0	0.011	0	0.005	279.808	0.878
2011001	10000	7	108	0.001	0.003	0	0.004	0.001	0	0.001	0	0.011	0	0.005	279.729	0.876
2011001	10000	7	109	0.001	0.003	0	0.004	0.001	0	0.001	0	0.011	0	0.006	279.608	0.873
2011001	10000	7	110	0.001	0.003	0	0.004	0.001	0	0.001	0	0.011	0	0.006	279.582	0.87
2011001	10000	7	111	0.002	0.003	0	0.004	0.001	0	0	0	0.01	0	0.005	279.581	0.869
2011001	10000	7	112	0.003	0.003	0	0.004	0.001	0	0	0	0.01	0	0.005	279.569	0.866
2011001	10000	8	1	0	0.003	0	0.002	0.001	0	0	0	0.006	0	0.003	292.123	0.835
2011001	10000	8	2	0	0.003	0	0.002	0.001	0	0	0	0.006	0	0.003	291.936	0.833
2011001	10000	8	3	0	0.003	0	0.002	0.001	0	0	0	0.006	0	0.003	291.73	0.831
2011001	10000	8	4	0	0.003	0	0.002	0.001	0	0	0	0.006	0	0.003	291.574	0.831
2011001	10000	8	5	0	0.003	0	0.002	0.001	0	0	0	0.006	0	0.003	291.418	0.83
2011001	10000	8	6	0	0.003	0	0.002	0.001	0	0	0	0.006	0	0.003	291.261	0.83
2011001	10000	8	7	0	0.003	0	0.002	0.001	0	0	0	0.006	0	0.003	291.1	0.83
2011001	10000	8	8	0	0.003	0	0.002	0.001	0	0	0	0.006	0	0.003	290.965	0.829
2011001	10000	8	9	0	0.003	0	0.002	0.001	0	0	0	0.006	0	0.003	290.83	0.831
2011001	10000	8	10	0	0.004	0	0.002	0.001	0	0	0	0.006	0	0.004	290.681	0.832
2011001	10000	8	11	0	0.004	0	0.002	0.001	0	0	0	0.006	0	0.004	290.578	0.832
2011001	10000	8	12	0	0.005	0	0.002	0.001	0	0	0	0.006	0	0.004	290.419	0.834
2011001	10000	8	13	0	0.005	0	0.002	0.001	0	0	0	0.006	0	0.004	290.318	0.835
2011001	10000	8	14	0	0.006	0	0.002	0.001	0	0	0	0.006	0	0.004	290.199	0.834
2011001	10000	8	15	0	0.006	0	0.002	0.001	0	0	0	0.006	0	0.004	290.036	0.837
2011001	10000	8	16	0	0.005	0	0.002	0.001	0	0	0	0.006	0	0.004	289.886	0.844
2011001	10000	8	17	0	0.005	0	0.002	0.001	0	0	0	0.006	0	0.004	289.693	0.851
2011001	10000	8	18	0	0.005	0	0.002	0.001	0	0	0	0.006	0	0.004	289.555	0.855
2011001	10000	8	19	0	0.005	0	0.002	0.001	0	0	0	0.006	0	0.004	289.326	0.863
2011001	10000	8	20	0	0.005	0	0.002	0.001	0	0	0	0.006	0	0.004	289.19	0.866
2011001	10000	8	21	0	0.005	0	0.002	0.001	0	0	0	0.007	0	0.004	289.059	0.869
2011001	10000	8	22	0	0.005	0	0.002	0.001	0	0	0	0.007	0	0.005	288.903	0.873
2011001	10000	8	23	0	0.005	0	0.002	0.001	0	0	0	0.007	0	0.005	288.81	0.872
2011001	10000	8	24	0	0.006	0	0.002	0.001	0	0	0	0.007	0	0.005	288.687	0.872
2011001	10000	8	25	0	0.006	0	0.002	0.001	0	0	0	0.007	0	0.005	288.565	0.874
2011001	10000	8	26	0	0.006	0	0.003	0.001	0	0	0	0.008	0	0.005	288.472	0.873
2011001	10000	8	27	0	0.006	0	0.003	0.001	0	0	0	0.008	0	0.005	288.356	0.875
2011001	10000	8	28	0	0.006	0	0.003	0.001	0	0	0	0.009	0	0.005	288.236	0.883
2011001	10000	8	29	0	0.006	0	0.003	0.001	0	0	0	0.009	0	0.005	288.127	0.884
2011001	10000	8	30	0	0.005	0	0.004	0.001	0	0	0	0.009	0	0.005	288.047	0.889
2011001	10000	8	31	0	0.005	0	0.004	0.001	0	0.001	0	0.009	0	0.005	287.916	0.893
2011001	10000	8	32	0	0.005	0	0.004	0.001	0	0.001	0.001	0.01	0	0.005	287.854	0.896
2011001	10000	8	33	0	0.005	0	0.004	0.001	0	0.001	0.001	0.01	0	0.006	287.828	0.895
2011001	10000	8	34	0	0.006	0	0.005	0.001	0	0.001	0.001	0.011	0	0.006	287.801	0.893
2011001	10000	8	35	0.001	0.007	0	0.005	0.002	0	0.001	0.001	0.011	0.001	0.006	287.745	0.894
2011001	10000	8	36	0	0.008	0	0.005	0.002	0	0.001	0.001	0.011	0.001	0.006	287.702	0.892
2011001	10000	8	37	0.001	0.009	0	0.005	0.002	0	0.001	0.001	0.012	0.001	0.006	287.653	0.894
2011001	10000	8	38	0.001	0.009	0	0.005	0.002	0	0.001	0.001	0.011	0.001	0.006	287.601	0.899
2011001	10000	8	39	0.001	0.013	0	0.005	0.002	0	0.001	0.001	0.012	0.001	0.007	287.575	0.896
2011001	10000	8	40	0.001	0.016	0	0.005	0.002	0	0.001	0.001	0.012	0.001	0.007	287.543	0.897
2011001	10000	8	41	0.001	0.018	0	0.005	0.002	0	0.001	0.001	0.012	0.001	0.007	287.482	0.896
2011001	10000	8	42	0.002	0.015	0	0.005	0.002	0	0.001	0.001	0.012	0.001	0.006	287.339	0.897
2011001	10000	8	43	0.002	0.015	0	0.005	0.002	0	0.001	0.001	0.012	0.001	0.006	287.211	0.901
2011001	10000	8	44	0.003	0.013	0	0.005	0.002	0	0.001	0.001	0.012	0.001	0.006	287.043	0.901
2011001	10000	8	45	0.004	0.013	0	0.005	0.002	0	0.001	0.001	0.012	0.001	0.006	286.951	0.901
2011001	10000	8	46	0.002	0.012	0	0.005	0.002	0	0.001	0.001	0.011	0.001	0.006	286.772	0.902
2011001	10000	8	47	0.001	0.013	0	0.005	0.002	0	0.001	0.001	0.011	0.001	0.006	286.6	0.906
2011001	10000	8	48	0.002	0.014	0	0.005	0.002	0	0.001	0.001	0.011	0.001	0.007	286.473	0.908
2011001	10000	8	49	0.002	0.014	0	0.005	0.002	0	0.001	0.001	0.011	0.001	0.007	286.261	0.912
2011001	10000	8	50	0.003	0.015	0	0.005	0.002	0	0.001	0.001	0.011	0.001	0.007	286.151	0.911
2011001	10000	8	51	0.004	0.014	0	0.005	0.002	0	0.001	0.001	0.011	0.001	0.007	286.02	0.913
2011001	10000	8	52	0.003	0.012	0	0.005	0.002	0	0.001	0.001	0.01	0.001	0.006	285.743	0.916
2011001	10000	8	53	0.002	0.012	0	0.005	0.001	0	0.001	0.001	0.01	0.001	0.006	285.622	0.918
2011001	10000	8	54	0.002	0.014	0	0.005	0.001	0	0.001	0.001	0.01	0.001	0.006	285.485	0.916
2011001	10000	8	55	0.002	0.017	0	0.005	0.001	0	0.001	0.001	0.01	0.001	0.007	285.249	0.916
2011001	10000	8	56	0.002	0.017	0	0.005	0.001	0	0.001	0.001	0.01	0.001	0.007	285.166	0.914
2011001	10000	8	57	0.002	0.015	0	0.005	0.001	0	0.001	0.001	0.01	0.001	0.006	284.965	0.914
2011001	10000	8	58	0.002	0.013	0	0.005	0.001	0	0.001	0	0.01	0.001	0.006	284.822	0.913
2011001	10000	8	59	0.002	0.009	0	0.004	0.001	0	0.001	0	0.009	0	0.005	284.777	0.912
2011001	10000	8	60	0.002	0.006	0	0.004	0.001	0	0.001	0	0.009	0	0.005	284.638	0.913
2011001	10000	8	61	0.002	0.006	0	0.004	0.001	0	0.001	0	0.008	0	0.004	284.564	0.915
2011001	10000	8	62	0.003	0.006	0	0.004	0.001	0	0.001	0	0.008	0	0.004	284.454	0.917
2011001	10000	8	63	0.002	0.005	0	0.004	0.001	0	0	0	0.008	0	0.004	284.382	0.918
2011001	10000	8	64	0.001	0.004	0	0.004	0.001	0	0	0	0.008	0	0.004	284.297	0.92
2011001	10000	8	65	0.001	0.004	0	0.004	0.001	0	0	0	0.008	0	0.004	284.164	0.922
2011001	10000	8	66	0.001	0.004	0	0.003	0.001	0	0	0	0.007	0	0.004	284.029	0.924
2011001	10000	8	67	0.001	0.004	0	0.003	0.001	0	0	0	0.007	0	0.004	283.915	0.923
2011001	10000	8	68	0.001	0.004	0	0.003	0.001	0	0	0	0.007	0	0.004	283.771	0.922
2011001	10000	8	69	0	0.004	0	0.003	0.001	0	0	0	0.008	0	0.004	283.636	0.924
2011001	10000	8	70	0	0.004	0	0.003	0.001	0	0	0	0.008	0	0.005	283.527	0.921
2011001	10000	8	71	0	0.004	0	0.003	0.001	0	0	0	0.008	0	0.005	283.355	0.919
2011001	10000	8	72	0	0.004	0	0.003	0.001	0	0	0	0.008	0	0.005	283.261	0.916
2011001	10000	8	73	0	0.004	0	0.003	0.001	0	0	0	0.009	0	0.005	283.191	0.913
2011001	10000	8	74	0	0.004	0	0.003	0.001	0	0	0	0.009	0	0.006	283.087	0.911
2011001	10000	8	75	0	0.004	0	0.003	0.001	0	0	0	0.009	0	0.006	283.023	0.911
2011001	10000	8	76	0	0.004	0	0.003	0.001	0	0	0	0.009	0	0.006	282.951	0.911
2011001	10000	8	77	0	0.005	0	0.003	0.001	0	0	0	0.01	0	0.006	282.875	0.91
2011001	10000	8	78	0	0.005	0	0.003	0.001	0	0	0	0.01	0	0.006	282.788	0.914
2011001	10000	8	79	0.001	0.005	0	0.003	0.001	0	0	0	0.01	0	0.006	282.683	0.915
2011001	10000	8	80	0.001	0.005	0	0.003	0.001	0	0	0	0.01	0	0.006	282.598	0.914
2011001	10000	8	81	0.001	0.004	0	0.003	0.001	0	0	0	0.01	0	0.006	282.529	0.917
2011001	10000	8	82	0.001	0.004	0	0.003	0.001	0	0	0	0.01	0	0.006	282.399	0.918
2011001	10000	8	83	0	0.004	0	0.004	0.001	0	0	0	0.01	0	0.006	282.303	0.919
2011001	10000	8	84	0	0.004	0	0.004	0.001	0	0	0	0.01	0	0.006	282.206	0.92
2011001	10000	8	85	0.001	0.004	0	0.004	0.001	0	0	0	0.01	0	0.006	282.099	0.919
2011001	10000	8	86	0.001	0.003	0	0.004	0.001	0	0	0	0.01	0	0.006	282.032	0.92
2011001	10000	8	87	0.001	0.003	0	0.004	0.001	0	0	0	0.011	0	0.006	281.95	0.919
2011001	10000	8	88	0.001	0.003	0	0.004	0.001	0	0	0	0.011	0	0.006	281.865	0.919
2011001	10000	8	89	0.001	0.003	0	0.004	0.001	0	0	0	0.01	0	0.006	281.807	0.917
2011001	10000	8	90	0.001	0.003	0	0.004	0.001	0	0	0	0.01	0	0.006	281.728	0.92
2011001	10000	8	91	0.001	0.003	0	0.004	0.001	0	0	0	0.01	0	0.006	281.575	0.924
2011001	10000	8	92	0.001	0.003	0	0.004	0.001	0	0	0	0.01	0	0.006	281.49	0.925
2011001	10000	8	93	0.001	0.003	0	0.004	0.001	0	0	0	0.01	0	0.005	281.388	0.926
2011001	10000	8	94	0.001	0.004	0	0.004	0.001	0	0.001	0	0.01	0	0.005	281.235	0.925
2011001	10000	8	95	0.001	0.004	0	0.004	0.001	0	0.001	0	0.01	0	0.005	281.121	0.922
2011001	10000	8	96	0.001	0.004	0	0.004	0.001	0	0.001	0	0.011	0	0.005	281.033	0.92
2011001	10000	8	97	0.003	0.005	0	0.004	0.001	0	0.001	0	0.011	0	0.006	280.856	0.915
2011001	10000	8	98	0.009	0.005	0	0.005	0.001	0	0.001	0	0.012	0	0.006	280.76	0.909
2011001	10000	8	99	0.004	0.005	0	0.005	0.001	0	0.001	0	0.012	0	0.006	280.648	0.905
2011001	10000	8	100	0.003	0.005	0	0.005	0.001	0	0.001	0	0.012	0	0.005	280.484	0.899
2011001	10000	8	101	0.003	0.004	0	0.005	0.001	0	0.001	0	0.011	0	0.005	280.4	0.895
2011001	10000	8	102	0.002	0.004	0	0.005	0.001	0	0.001	0	0.011	0	0.005	280.332	0.89
2011001	10000	8	103	0.002	0.004	0	0.005	0.001	0	0.001	0	0.011	0	0.005	280.204	0.886
2011001	10000	8	104	0.001	0.004	0	0.005	0.001	0	0.001	0	0.011	0	0.005	280.106	0.881
2011001	10000	8	105	0.001	0.004	0	0.005	0.001	0	0.001	0	0.011	0	0.005	280.015	0.877
2011001	10000	8	106	0.001	0.004	0	0.005	0.001	0	0.001	0	0.011	0	0.005	279.92	0.873
2011001	10000	8	107	0.001	0.003	0	0.005	0.001	0	0.001	0	0.011	0	0.005	279.81	0.873
2011001	10000	8	108	0.001	0.003	0	0.004	0.001	0	0.001	0	0.011	0	0.005	279.706	0.87
2011001	10000	8	109	0.001	0.003	0	0.005	0.001	0	0.001	0	0.011	0	0.005	279.625	0.868
2011001	10000	8	110	0.001	0.003	0	0.005	0.001	0	0.001	0	0.011	0	0.005	279.593	0.866
2011001	10000	8	111	0.002	0.003	0	0.004	0.001	0	0.001	0	0.01	0	0.005	279.665	0.862
2011001	10000	8	112	0.003	0.002	0	0.004	0.001	0	0.001	0	0.01	0	0.005	279.798	0.861
2011001	10000	9	1	0	0.003	0	0.002	0.001	0	0	0	0.006	0	0.003	292.064	0.833
2011001	10000	9	2	0	0.003	0	0.002	0.001	0	0	0	0.006	0	0.003	291.81	0.834
2011001	10000	9	3	0	0.003	0	0.002	0.001	0	0	0	0.006	0	0.003	291.636	0.835
2011001	10000	9	4	0	0.003	0	0.002	0.001	0	0	0	0.006	0	0.003	291.434	0.835
2011001	10000	9	5	0	0.003	0	0.002	0.001	0	0	0	0.006	0	0.003	291.291	0.831
2011001	10000	9	6	0	0.003	0	0.002	0.001	0	0	0	0.006	0	0.003	291.155	0.831
2011001	10000	9	7	0	0.003	0	0.002	0.001	0	0	0	0.005	0	0.003	291.003	0.832
2011001	10000	9	8	0	0.003	0	0.002	0.001	0	0	0	0.005	0	0.003	290.89	0.831
2011001	10000	9	9	0	0.003	0	0.001	0.001	0	0	0	0.006	0	0.003	290.716	0.832
2011001	10000	9	10	0	0.003	0	0.002	0.001	0	0	0	0.006	0	0.003	290.569	0.834
2011001	10000	9	11	0	0.004	0	0.002	0.001	0	0	0	0.006	0	0.004	290.412	0.839
2011001	10000	9	12	0	0.004	0	0.001	0.001	0	0	0	0.006	0	0.004	290.339	0.835
2011001	10000	9	13	0	0.005	0	0.001	0.001	0	0	0	0.006	0	0.004	290.184	0.839
2011001	10000	9	14	0	0.005	0	0.002	0.001	0	0	0	0.006	0	0.004	290.069	0.837
2011001	10000	9	15	0	0.005	0	0.002	0.001	0	0	0	0.006	0	0.004	289.946	0.841
2011001	10000	9	16	0	0.005	0	0.002	0.001	0	0	0	0.006	0	0.004	289.778	0.848
2011001	10000	9	17	0	0.005	0	0.002	0.001	0	0	0	0.006	0	0.004	289.603	0.854
2011001	10000	9	18	0	0.005	0	0.002	0.001	0	0	0	0.006	0	0.004	289.38	0.863
2011001	10000	9	19	0	0.005	0	0.002	0.001	0	0	0	0.006	0	0.004	289.211	0.868
2011001	10000	9	20	0	0.005	0	0.002	0.001	0	0	0	0.006	0	0.004	289.087	0.87
2011001	10000	9	21	0	0.005	0	0.002	0.001	0	0	0	0.006	0	0.004	288.951	0.872
2011001	10000	9	22	0	0.005	0	0.002	0.001	0	0	0	0.007	0	0.004	288.799	0.877
2011001	10000	9	23	0	0.005	0	0.002	0.001	0	0	0	0.007	0	0.005	288.651	0.877
2011001	10000	9	24	0	0.005	0	0.002	0.001	0	0	0	0.007	0	0.005	288.548	0.879
2011001	10000	9	25	0	0.005	0	0.002	0.001	0	0	0	0.007	0	0.005	288.423	0.879
2011001	10000	9	26	0	0.005	0	0.003	0.001	0	0	0	0.008	0	0.005	288.307	0.881
2011001	10000	9	27	0	0.006	0	0.003	0.001	0	0	0	0.008	0	0.005	288.217	0.884
2011001	10000	9	28	0	0.006	0	0.003	0.001	0	0	0	0.009	0	0.005	288.115	0.886
2011001	10000	9	29	0	0.006	0	0.003	0.001	0	0	0	0.009	0	0.005	288.043	0.887
2011001	10000	9	30	0	0.006	0	0.004	0.001	0	0	0	0.009	0	0.005	287.898	0.891
2011001	10000	9	31	0	0.005	0	0.004	0.001	0	0.001	0.001	0.01	0	0.005	287.792	0.896
2011001	10000	9	32	0	0.005	0	0.004	0.001	0	0.001	0.001	0.01	0	0.005	287.748	0.897
2011001	10000	9	33	0	0.006	0	0.004	0.001	0	0.001	0.001	0.01	0	0.005	287.678	0.899
2011001	10000	9	34	0	0.006	0	0.005	0.001	0	0.001	0.001	0.011	0.001	0.006	287.665	0.897
2011001	10000	9	35	0.001	0.007	0	0.005	0.002	0	0.001	0.001	0.011	0.001	0.006	287.613	0.898
2011001	10000	9	36	0	0.008	0	0.005	0.002	0	0.001	0.001	0.012	0.001	0.006	287.612	0.897
2011001	10000	9	37	0.001	0.01	0	0.005	0.002	0	0.001	0.001	0.012	0.001	0.007	287.579	0.899
2011001	10000	9	38	0.001	0.012	0	0.005	0.002	0	0.001	0.001	0.012	0.001	0.007	287.515	0.901
2011001	10000	9	39	0.001	0.014	0	0.005	0.002	0	0.001	0.001	0.012	0.001	0.007	287.511	0.901
2011001	10000	9	40	0.001	0.018	0	0.005	0.002	0	0.001	0.001	0.012	0.001	0.007	287.484	0.898
2011001	10000	9	41	0.002	0.016	0	0.005	0.002	0	0.001	0.001	0.011	0.001	0.006	287.342	0.901
2011001	10000	9	42	0.002	0.013	0	0.005	0.002	0	0.001	0.001	0.011	0.001	0.006	287.294	0.898
2011001	10000	9	43	0.002	0.013	0	0.005	0.002	0	0.001	0.001	0.011	0.001	0.006	287.065	0.9
2011001	10000	9	44	0.003	0.013	0	0.005	0.002	0	0.001	0.001	0.011	0.001	0.006	286.896	0.9
2011001	10000	9	45	0.004	0.013	0.001	0.005	0.002	0	0.001	0.001	0.011	0.001	0.006	286.832	0.898
2011001	10000	9	46	0.002	0.013	0.001	0.005	0.002	0	0.001	0.001	0.011	0.001	0.006	286.665	0.899
2011001	10000	9	47	0.002	0.014	0.001	0.005	0.002	0	0.001	0.001	0.011	0.001	0.006	286.559	0.9
2011001	10000	9	48	0.003	0.015	0.001	0.005	0.002	0	0.001	0.001	0.01	0.001	0.006	286.362	0.902
2011001	10000	9	49	0.003	0.015	0.001	0.005	0.002	0	0.001	0.001	0.011	0.001	0.006	286.224	0.907
2011001	10000	9	50	0.004	0.016	0	0.005	0.002	0	0.001	0.001	0.011	0.001	0.006	286.098	0.908
2011001	10000	9	51	0.005	0.015	0	0.005	0.002	0	0.001	0.001	0.011	0.001	0.006	285.901	0.911
2011001	10000	9	52	0.002	0.015	0	0.005	0.002	0	0.001	0.001	0.01	0.001	0.006	285.721	0.913
2011001	10000	9	53	0.002	0.016	0	0.005	0.002	0	0.001	0.001	0.01	0.001	0.006	285.572	0.914
2011001	10000	9	54	0.002	0.017	0	0.005	0.001	0	0.001	0.001	0.01	0.001	0.007	285.374	0.914
2011001	10000	9	55	0.002	0.02	0	0.005	0.001	0	0.001	0.001	0.01	0.001	0.007	285.292	0.91
2011001	10000	9	56	0.003	0.021	0	0.005	0.001	0	0.001	0.001	0.01	0.001	0.007	285.039	0.911
2011001	10000	9	57	0.002	0.018	0	0.005	0.001	0	0.001	0.001	0.01	0.001	0.007	284.872	0.913
2011001	10000	9	58	0.003	0.018	0	0.004	0.001	0	0.001	0.001	0.01	0.001	0.006	284.767	0.913
2011001	10000	9	59	0.003	0.014	0	0.004	0.001	0	0.001	0	0.009	0.001	0.006	284.607	0.914
2011001	10000	9	60	0.003	0.009	0	0.004	0.001	0	0.001	0	0.009	0	0.005	284.534	0.913
2011001	10000	9	61	0.003	0.007	0	0.004	0.001	0	0.001	0	0.008	0	0.005	284.473	0.914
2011001	10000	9	62	0.004	0.006	0	0.004	0.001	0	0.001	0	0.008	0	0.004	284.405	0.915
2011001	10000	9	63	0.001	0.006	0	0.004	0.001	0	0	0	0.008	0	0.004	284.375	0.916
2011001	10000	9	64	0.001	0.005	0	0.004	0.001	0	0	0	0.007	0	0.004	284.181	0.92
2011001	10000	9	65	0.001	0.004	0	0.004	0.001	0	0	0	0.007	0	0.004	284.007	0.921
2011001	10000	9	66	0.001	0.004	0	0.004	0.001	0	0	0	0.007	0	0.004	283.978	0.922
2011001	10000	9	67	0.001	0.004	0	0.003	0.001	0	0	0	0.007	0	0.004	283.906	0.921
2011001	10000	9	68	0.001	0.004	0	0.003	0.001	0	0	0	0.007	0	0.004	283.707	0.923
2011001	10000	9	69	0.001	0.004	0	0.003	0.001	0	0	0	0.007	0	0.004	283.516	0.925
2011001	10000	9	70	0.001	0.004	0	0.003	0.001	0	0	0	0.007	0	0.004	283.377	0.923
2011001	10000	9	71	0.001	0.004	0	0.003	0.001	0	0	0	0.008	0	0.005	283.313	0.92
2011001	10000	9	72	0	0.004	0	0.003	0.001	0	0	0	0.008	0	0.005	283.192	0.917
2011001	10000	9	73	0	0.004	0	0.003	0.001	0	0	0	0.009	0	0.005	283.075	0.915
2011001	10000	9	74	0.001	0.004	0	0.003	0.001	0	0	0	0.009	0	0.005	283.051	0.911
2011001	10000	9	75	0.001	0.004	0	0.003	0.001	0	0	0	0.009	0	0.005	282.995	0.906
2011001	10000	9	76	0.001	0.004	0	0.003	0.001	0	0	0	0.009	0	0.005	282.908	0.908
2011001	10000	9	77	0.001	0.004	0	0.003	0.001	0	0	0	0.009	0	0.006	282.847	0.908
2011001	10000	9	78	0.001	0.005	0	0.003	0.001	0	0	0	0.009	0	0.006	282.753	0.909
2011001	10000	9	79	0.001	0.005	0	0.003	0.001	0	0	0	0.01	0	0.006	282.644	0.91
2011001	10000	9	80	0.001	0.005	0	0.003	0.001	0	0	0	0.01	0	0.006	282.564	0.913
2011001	10000	9	81	0.001	0.004	0	0.003	0.001	0	0	0	0.01	0	0.006	282.474	0.915
2011001	10000	9	82	0.001	0.004	0	0.004	0.001	0	0	0	0.01	0	0.006	282.345	0.917
2011001	10000	9	83	0.001	0.004	0	0.004	0.001	0	0	0	0.01	0	0.006	282.258	0.918
2011001	10000	9	84	0	0.004	0	0.004	0.001	0	0	0	0.01	0	0.006	282.135	0.919
2011001	10000	9	85	0	0.004	0	0.004	0.001	0	0.001	0	0.01	0	0.006	282.06	0.919
2011001	10000	9	86	0.001	0.004	0	0.004	0.001	0	0.001	0	0.01	0	0.006	281.977	0.919
2011001	10000	9	87	0.001	0.003	0	0.004	0.001	0	0.001	0	0.01	0	0.006	281.865	0.921
2011001	10000	9	88	0.001	0.003	0	0.004	0.001	0	0.001	0	0.01	0	0.006	281.796	0.921
2011001	10000	9	89	0.001	0.003	0	0.004	0.001	0	0.001	0	0.01	0	0.006	281.685	0.925
2011001	10000	9	90	0.001	0.003	0	0.004	0.001	0	0	0	0.009	0	0.005	281.6	0.925
2011001	10000	9	91	0.001	0.003	0	0.004	0.001	0	0	0	0.01	0	0.005	281.528	0.926
2011001	10000	9	92	0.001	0.003	0	0.004	0.001	0	0	0	0.01	0	0.005	281.433	0.926
2011001	10000	9	93	0.001	0.003	0	0.004	0.001	0	0.001	0	0.01	0	0.005	281.32	0.925
2011001	10000	9	94	0.001	0.004	0	0.004	0.001	0	0.001	0	0.01	0	0.005	281.23	0.923
2011001	10000	9	95	0.001	0.004	0	0.004	0.001	0	0.001	0	0.01	0	0.005	281.028	0.922
2011001	10000	9	96	0.002	0.004	0	0.004	0.001	0	0.001	0	0.01	0	0.005	280.992	0.917
2011001	10000	9	97	0.005	0.005	0	0.005	0.001	0	0.001	0	0.011	0	0.005	280.904	0.912
2011001	10000	9	98	0.007	0.005	0	0.005	0.001	0	0.001	0	0.012	0	0.006	280.732	0.906
2011001	10000	9	99	0.004	0.005	0	0.005	0.001	0	0.001	0	0.012	0	0.006	280.594	0.901
2011001	10000	9	100	0.004	0.005	0	0.005	0.001	0	0.001	0	0.012	0	0.005	280.53	0.897
2011001	10000	9	101	0.003	0.005	0	0.005	0.001	0	0.001	0	0.011	0	0.005	280.392	0.89
2011001	10000	9	102	0.002	0.004	0	0.005	0.001	0	0.001	0	0.011	0	0.005	280.288	0.885
2011001	10000	9	103	0.001	0.004	0	0.005	0.001	0	0.001	0	0.011	0	0.005	280.2	0.882
2011001	10000	9	104	0.001	0.004	0	0.005	0.001	0	0.001	0	0.011	0	0.005	280.094	0.876
2011001	10000	9	105	0.001	0.003	0	0.005	0.001	0	0.001	0	0.011	0	0.005	279.996	0.872
2011001	10000	9	106	0.001	0.003	0	0.005	0.001	0	0.001	0	0.011	0	0.005	279.899	0.87
2011001	10000	9	107	0.001	0.003	0	0.005	0.001	0	0.001	0	0.011	0	0.005	279.805	0.866
2011001	10000	9	108	0.001	0.003	0	0.005	0.001	0	0.001	0	0.011	0	0.005	279.666	0.865
2011001	10000	9	109	0.001	0.003	0	0.005	0.001	0	0.001	0	0.011	0	0.005	279.57	0.863
2011001	10000	9	110	0.001	0.003	0	0.005	0.001	0	0.001	0	0.01	0	0.005	279.484	0.859
2011001	10000	9	111	0.002	0.002	0	0.005	0.001	0	0.001	0	0.01	0	0.005	279.642	0.858
2011001	10000	9	112	0.003	0.002	0	0.004	0.001	0	0.001	0	0.009	0	0.004	279.939	0.859
2011001	10000	10	1	0	0.002	0	0.002	0.001	0	0	0	0.007	0	0.003	291.921	0.837
2011001	10000	10	2	0	0.002	0	0.002	0.001	0	0	0	0.006	0	0.003	291.726	0.838
2011001	10000	10	3	0	0.003	0	0.002	0.001	0	0	0	0.006	0	0.003	291.501	0.836
2011001	10000	10	4	0	0.003	0	0.002	0.001	0	0	0	0.006	0	0.003	291.332	0.836
2011001	10000	10	5	0	0.003	0	0.002	0.001	0	0	0	0.006	0	0.003	291.167	0.836
2011001	10000	10	6	0	0.003	0	0.002	0.001	0	0	0	0.006	0	0.003	291.053	0.833
2011001	10000	10	7	0	0.003	0	0.002	0.001	0	0	0	0.005	0	0.003	290.917	0.831
2011001	10000	10	8	0	0.003	0	0.002	0.001	0	0	0	0.005	0	0.003	290.754	0.834
2011001	10000	10	9	0	0.003	0	0.001	0.001	0	0	0	0.006	0	0.003	290.586	0.835
2011001	10000	10	10	0	0.003	0	0.001	0.001	0	0	0	0.006	0	0.003	290.472	0.837
2011001	10000	10	11	0	0.004	0	0.001	0.001	0	0	0	0.006	0	0.004	290.321	0.84
2011001	10000	10	12	0	0.004	0	0.001	0.001	0	0	0	0.006	0	0.004	290.245	0.837
2011001	10000	10	13	0	0.004	0	0.001	0.001	0	0	0	0.006	0	0.004	290.034	0.846
2011001	10000	10	14	0	0.004	0	0.001	0.001	0	0	0	0.006	0	0.004	289.962	0.843
2011001	10000	10	15	0	0.004	0	0.002	0.001	0	0	0	0.006	0	0.004	289.831	0.847
2011001	10000	10	16	0	0.005	0	0.002	0.001	0	0	0	0.006	0	0.004	289.668	0.853
2011001	10000	10	17	0	0.005	0	0.002	0.001	0	0	0	0.006	0	0.004	289.493	0.857
2011001	10000	10	18	0	0.005	0	0.002	0.001	0	0	0	0.006	0	0.004	289.283	0.865
2011001	10000	10	19	0	0.005	0	0.002	0.001	0	0	0	0.006	0	0.004	289.13	0.87
2011001	10000	10	20	0	0.005	0	0.002	0.001	0	0	0	0.006	0	0.004	288.934	0.874
2011001	10000	10	21	0	0.005	0	0.002	0.001	0	0	0	0.006	0	0.004	288.821	0.876
2011001	10000	10	22	0	0.005	0	0.002	0.001	0	0	0	0.006	0	0.004	288.693	0.878
2011001	10000	10	23	0	0.005	0	0.002	0.001	0	0	0	0.007	0	0.004	288.58	0.879
2011001	10000	10	24	0	0.005	0	0.002	0.001	0	0	0	0.007	0	0.004	288.435	0.883
2011001	10000	10	25	0	0.005	0	0.002	0.001	0	0	0	0.007	0	0.005	288.253	0.888
2011001	10000	10	26	0	0.005	0	0.003	0.001	0	0	0	0.008	0	0.005	288.174	0.888
2011001	10000	10	27	0	0.005	0	0.003	0.001	0	0	0	0.008	0	0.005	288.083	0.888
2011001	10000	10	28	0	0.005	0	0.003	0.001	0	0	0	0.008	0	0.005	287.987	0.888
2011001	10000	10	29	0	0.005	0	0.003	0.001	0	0	0	0.009	0	0.005	287.854	0.891
2011001	10000	10	30	0	0.005	0	0.004	0.001	0	0	0	0.009	0	0.005	287.745	0.895
2011001	10000	10	31	0	0.005	0	0.004	0.001	0	0.001	0	0.009	0	0.005	287.702	0.897
2011001	10000	10	32	0	0.005	0	0.004	0.001	0	0.001	0	0.01	0	0.005	287.601	0.9
2011001	10000	10	33	0	0.006	0	0.004	0.001	0	0.001	0.001	0.01	0	0.005	287.573	0.903
2011001	10000	10	34	0	0.006	0	0.005	0.001	0	0.001	0.001	0.01	0.001	0.006	287.554	0.901
2011001	10000	10	35	0.001	0.007	0	0.005	0.002	0	0.001	0.001	0.011	0.001	0.006	287.537	0.903
2011001	10000	10	36	0.001	0.009	0	0.005	0.002	0	0.001	0.001	0.011	0.001	0.006	287.497	0.905
2011001	10000	10	37	0.001	0.011	0	0.005	0.002	0	0.001	0.001	0.012	0.001	0.007	287.438	0.908
2011001	10000	10	38	0.001	0.012	0	0.005	0.002	0	0.001	0.001	0.012	0.001	0.007	287.457	0.905
2011001	10000	10	39	0.001	0.014	0	0.005	0.002	0	0.001	0.001	0.011	0.001	0.006	287.396	0.905
2011001	10000	10	40	0.002	0.016	0	0.005	0.002	0	0.001	0.001	0.011	0.001	0.006	287.344	0.905
2011001	10000	10	41	0.002	0.013	0	0.005	0.002	0	0.001	0.001	0.011	0.001	0.006	287.252	0.905
2011001	10000	10	42	0.002	0.012	0	0.005	0.002	0	0.001	0.001	0.011	0.001	0.006	287.09	0.903
2011001	10000	10	43	0.003	0.012	0.001	0.005	0.002	0	0.001	0.001	0.011	0.001	0.006	286.937	0.902
2011001	10000	10	44	0.004	0.013	0.001	0.005	0.002	0	0.001	0.001	0.011	0.001	0.006	286.848	0.899
2011001	10000	10	45	0.004	0.014	0.001	0.005	0.002	0	0.001	0.001	0.011	0.001	0.006	286.716	0.897
2011001	10000	10	46	0.002	0.013	0.001	0.005	0.002	0	0.001	0.001	0.01	0.001	0.006	286.61	0.894
2011001	10000	10	47	0.003	0.015	0.001	0.005	0.002	0	0.001	0.001	0.01	0.001	0.006	286.423	0.895
2011001	10000	10	48	0.003	0.016	0.001	0.005	0.002	0	0.001	0.001	0.01	0.001	0.006	286.33	0.896
2011001	10000	10	49	0.004	0.018	0.001	0.005	0.002	0	0.001	0.001	0.011	0.001	0.007	286.178	0.898
2011001	10000	10	50	0.006	0.019	0.001	0.005	0.002	0	0.001	0.001	0.01	0.001	0.007	285.981	0.902
2011001	10000	10	51	0.005	0.018	0.001	0.005	0.002	0	0.001	0.001	0.01	0.001	0.007	285.883	0.905
2011001	10000	10	52	0.003	0.017	0.001	0.005	0.002	0	0.001	0.001	0.01	0.001	0.007	285.679	0.909
2011001	10000	10	53	0.003	0.018	0.001	0.005	0.002	0	0.001	0.001	0.01	0.001	0.007	285.522	0.909
2011001	10000	10	54	0.003	0.019	0.001	0.005	0.002	0	0.001	0.001	0.01	0.001	0.007	285.369	0.91
2011001	10000	10	55	0.003	0.022	0	0.005	0.001	0	0.001	0.001	0.01	0.001	0.007	285.173	0.909
2011001	10000	10	56	0.003	0.023	0	0.005	0.001	0	0.001	0.001	0.01	0.001	0.007	284.967	0.911
2011001	10000	10	57	0.003	0.023	0	0.004	0.001	0	0.001	0.001	0.01	0.001	0.007	284.849	0.911
2011001	10000	10	58	0.003	0.02	0	0.004	0.001	0	0.001	0.001	0.01	0.001	0.007	284.654	0.912
2011001	10000	10	59	0.004	0.016	0	0.004	0.001	0	0.001	0.001	0.009	0.001	0.006	284.539	0.913
2011001	10000	10	60	0.004	0.013	0	0.004	0.001	0	0.001	0	0.009	0.001	0.005	284.428	0.914
2011001	10000	10	61	0.005	0.01	0	0.004	0.001	0	0.001	0	0.009	0	0.005	284.393	0.914
2011001	10000	10	62	0.003	0.009	0	0.004	0.001	0	0.001	0	0.008	0	0.005	284.328	0.915
2011001	10000	10	63	0.002	0.008	0	0.004	0.001	0	0	0	0.008	0	0.005	284.23	0.915
2011001	10000	10	64	0.002	0.007	0	0.004	0.001	0	0	0	0.008	0	0.005	284.122	0.919
2011001	10000	10	65	0.002	0.007	0	0.003	0.001	0	0	0	0.008	0	0.005	284.033	0.919
2011001	10000	10	66	0.001	0.006	0	0.004	0.001	0	0	0	0.008	0	0.004	283.927	0.918
2011001	10000	10	67	0.001	0.006	0	0.003	0.001	0	0	0	0.008	0	0.004	283.853	0.92
2011001	10000	10	68	0.001	0.006	0	0.003	0.001	0	0	0	0.007	0	0.004	283.579	0.923
2011001	10000	10	69	0.001	0.005	0	0.003	0.001	0	0	0	0.007	0	0.004	283.456	0.924
2011001	10000	10	70	0.001	0.005	0	0.003	0.001	0	0	0	0.008	0	0.005	283.392	0.923
2011001	10000	10	71	0.001	0.005	0	0.003	0.001	0	0	0	0.007	0	0.005	283.177	0.921
2011001	10000	10	72	0.001	0.004	0	0.003	0.001	0	0	0	0.008	0	0.005	283.104	0.916
2011001	10000	10	73	0.001	0.004	0	0.003	0.001	0	0	0	0.008	0	0.005	283.116	0.912
2011001	10000	10	74	0.001	0.004	0	0.003	0.001	0	0	0	0.008	0	0.005	282.976	0.91
2011001	10000	10	75	0.001	0.004	0	0.003	0.001	0	0	0	0.009	0	0.005	282.936	0.907
2011001	10000	10	76	0.001	0.004	0	0.003	0.001	0	0	0	0.009	0	0.005	282.872	0.904
2011001	10000	10	77	0.001	0.004	0	0.003	0.001	0	0	0	0.009	0	0.005	282.763	0.906
2011001	10000	10	78	0.001	0.005	0	0.003	0.001	0	0	0	0.009	0	0.005	282.694	0.906
2011001	10000	10	79	0.001	0.005	0	0.003	0.001	0	0	0	0.009	0	0.006	282.613	0.908
2011001	10000	10	80	0.001	0.005	0	0.003	0.001	0	0	0	0.009	0	0.006	282.514	0.909
2011001	10000	10	81	0.001	0.005	0	0.003	0.001	0	0	0	0.009	0	0.006	282.417	0.911
2011001	10000	10	82	0.001	0.004	0	0.004	0.001	0	0	0	0.01	0	0.006	282.335	0.914
2011001	10000	10	83	0.001	0.004	0	0.004	0.001	0	0.001	0	0.01	0	0.006	282.229	0.914
2011001	10000	10	84	0.001	0.004	0	0.004	0.001	0	0.001	0	0.01	0	0.006	282.127	0.915
2011001	10000	10	85	0.001	0.004	0	0.004	0.001	0	0.001	0	0.01	0	0.006	282.056	0.916
2011001	10000	10	86	0.001	0.004	0	0.004	0.001	0	0.001	0	0.01	0	0.006	281.928	0.918
2011001	10000	10	87	0.001	0.004	0	0.004	0.001	0	0.001	0	0.01	0	0.006	281.842	0.92
2011001	10000	10	88	0.001	0.004	0	0.004	0.001	0	0.001	0	0.01	0	0.006	281.74	0.922
2011001	10000	10	89	0.001	0.003	0	0.004	0.001	0	0.001	0	0.01	0	0.006	281.588	0.923
2011001	10000	10	90	0.001	0.003	0	0.004	0.001	0	0.001	0	0.01	0	0.005	281.57	0.924
2011001	10000	10	91	0.001	0.003	0	0.004	0.001	0	0.001	0	0.009	0	0.005	281.418	0.925
2011001	10000	10	92	0.001	0.003	0	0.004	0.001	0	0.001	0	0.01	0	0.005	281.359	0.924
2011001	10000	10	93	0.001	0.004	0	0.004	0.001	0	0.001	0	0.01	0	0.005	281.275	0.923
2011001	10000	10	94	0.001	0.004	0	0.004	0.001	0	0.001	0	0.01	0	0.005	281.17	0.92
2011001	10000	10	95	0.002	0.004	0	0.004	0.001	0	0.001	0	0.01	0	0.005	280.979	0.921
2011001	10000	10	96	0.004	0.005	0	0.004	0.001	0	0.001	0	0.01	0	0.005	280.983	0.913
2011001	10000	10	97	0.009	0.005	0	0.005	0.001	0	0.001	0	0.011	0	0.005	280.837	0.907
2011001	10000	10	98	0.005	0.005	0	0.005	0.001	0	0.001	0	0.012	0	0.006	280.747	0.9
2011001	10000	10	99	0.004	0.005	0	0.005	0.001	0	0.001	0	0.012	0	0.006	280.609	0.899
2011001	10000	10	100	0.003	0.005	0	0.005	0.001	0	0.001	0	0.011	0	0.006	280.456	0.891
2011001	10000	10	101	0.002	0.005	0	0.005	0.001	0	0.001	0	0.011	0	0.005	280.325	0.886
2011001	10000	10	102	0.002	0.005	0	0.005	0.001	0	0.001	0	0.011	0	0.005	280.203	0.882
2011001	10000	10	103	0.001	0.004	0	0.005	0.001	0	0.001	0	0.011	0	0.005	280.051	0.879
2011001	10000	10	104	0.001	0.004	0	0.005	0.001	0	0.001	0	0.011	0	0.005	279.997	0.875
2011001	10000	10	105	0.001	0.003	0	0.005	0.002	0	0.001	0	0.011	0	0.005	279.97	0.869
2011001	10000	10	106	0.001	0.003	0	0.005	0.002	0	0.001	0	0.011	0	0.005	279.879	0.864
2011001	10000	10	107	0.001	0.003	0	0.005	0.001	0	0.001	0	0.011	0	0.005	279.784	0.861
2011001	10000	10	108	0.001	0.003	0	0.005	0.001	0	0.001	0	0.011	0	0.005	279.656	0.857
2011001	10000	10	109	0.001	0.002	0	0.005	0.001	0	0.001	0	0.01	0	0.005	279.44	0.853
2011001	10000	10	110	0.002	0.002	0	0.005	0.001	0	0.001	0	0.01	0	0.005	279.164	0.854
2011001	10000	10	111	0.002	0.002	0	0.004	0.001	0	0	0	0.009	0	0.004	278.883	0.862
2011001	10000	10	112	0.003	0.002	0	0.004	0.001	0	0	0	0.009	0	0.004	278.311	0.885
2011001	10000	11	1	0	0.002	0	0.002	0.001	0	0	0	0.007	0	0.003	291.801	0.838
2011001	10000	11	2	0	0.002	0	0.002	0.001	0	0	0	0.006	0	0.003	291.613	0.837
2011001	10000	11	3	0	0.003	0	0.002	0.001	0	0	0	0.006	0	0.003	291.396	0.84
2011001	10000	11	4	0	0.003	0	0.002	0.001	0	0	0	0.006	0	0.003	291.228	0.839
2011001	10000	11	5	0	0.003	0	0.002	0.001	0	0	0	0.006	0	0.003	291.017	0.841
2011001	10000	11	6	0	0.003	0	0.002	0.001	0	0	0	0.006	0	0.003	290.883	0.839
2011001	10000	11	7	0	0.003	0	0.002	0.001	0	0	0	0.006	0	0.003	290.725	0.838
2011001	10000	11	8	0	0.003	0	0.002	0.001	0	0	0	0.006	0	0.003	290.608	0.838
2011001	10000	11	9	0	0.003	0	0.002	0.001	0	0	0	0.006	0	0.003	290.438	0.84
2011001	10000	11	10	0	0.003	0	0.002	0.001	0	0	0	0.006	0	0.004	290.29	0.842
2011001	10000	11	11	0	0.004	0	0.001	0.001	0	0	0	0.006	0	0.004	290.191	0.843
2011001	10000	11	12	0	0.004	0	0.001	0.001	0	0	0	0.006	0	0.004	290.08	0.845
2011001	10000	11	13	0	0.004	0	0.001	0.001	0	0	0	0.006	0	0.004	289.994	0.846
2011001	10000	11	14	0	0.004	0	0.001	0.001	0	0	0	0.006	0	0.004	289.775	0.853
2011001	10000	11	15	0	0.004	0	0.001	0.001	0	0	0	0.006	0	0.004	289.677	0.855
2011001	10000	11	16	0	0.005	0	0.002	0.001	0	0	0	0.006	0	0.004	289.55	0.859
2011001	10000	11	17	0	0.005	0	0.002	0.001	0	0	0	0.006	0	0.004	289.388	0.864
2011001	10000	11	18	0	0.005	0	0.002	0.001	0	0	0	0.006	0	0.004	289.212	0.869
2011001	10000	11	19	0	0.005	0	0.002	0.001	0	0	0	0.006	0	0.004	289.013	0.874
2011001	10000	11	20	0	0.005	0	0.002	0.001	0	0	0	0.006	0	0.004	288.884	0.876
2011001	10000	11	21	0	0.005	0	0.002	0.001	0	0	0	0.006	0	0.004	288.73	0.879
2011001	10000	11	22	0	0.005	0	0.002	0.001	0	0	0	0.007	0	0.005	288.586	0.882
2011001	10000	11	23	0	0.005	0	0.002	0.001	0	0	0	0.007	0	0.005	288.413	0.885
2011001	10000	11	24	0	0.005	0	0.002	0.001	0	0	0	0.007	0	0.005	288.275	0.887
2011001	10000	11	25	0	0.005	0	0.002	0.001	0	0	0	0.007	0	0.005	288.18	0.887
2011001	10000	11	26	0	0.005	0	0.003	0.001	0	0	0	0.008	0	0.005	288.051	0.887
2011001	10000	11	27	0	0.005	0	0.003	0.001	0	0	0	0.008	0	0.005	287.955	0.889
2011001	10000	11	28	0	0.005	0	0.003	0.001	0	0	0	0.008	0	0.005	287.818	0.894
2011001	10000	11	29	0	0.005	0	0.003	0.001	0	0	0	0.008	0	0.005	287.72	0.896
2011001	10000	11	30	0	0.005	0	0.004	0.001	0	0	0	0.009	0	0.005	287.669	0.896
2011001	10000	11	31	0	0.005	0	0.004	0.001	0	0.001	0	0.009	0	0.005	287.558	0.899
2011001	10000	11	32	0	0.005	0	0.004	0.001	0	0.001	0	0.01	0	0.005	287.516	0.902
2011001	10000	11	33	0	0.006	0	0.004	0.001	0	0.001	0.001	0.01	0	0.005	287.45	0.904
2011001	10000	11	34	0	0.007	0	0.005	0.001	0	0.001	0.001	0.01	0.001	0.005	287.406	0.906
2011001	10000	11	35	0.001	0.008	0	0.005	0.002	0	0.001	0.001	0.011	0.001	0.006	287.406	0.91
2011001	10000	11	36	0.001	0.01	0	0.005	0.002	0	0.001	0.001	0.011	0.001	0.006	287.408	0.91
2011001	10000	11	37	0.001	0.011	0	0.005	0.002	0	0.001	0.001	0.011	0.001	0.006	287.414	0.91
2011001	10000	11	38	0.001	0.013	0	0.005	0.002	0	0.001	0.001	0.011	0.001	0.006	287.324	0.911
2011001	10000	11	39	0.002	0.015	0	0.006	0.002	0	0.001	0.001	0.011	0.001	0.006	287.28	0.909
2011001	10000	11	40	0.002	0.015	0	0.006	0.002	0	0.001	0.001	0.011	0.001	0.006	287.27	0.904
2011001	10000	11	41	0.002	0.013	0.001	0.006	0.002	0	0.001	0.001	0.011	0.001	0.006	287.096	0.905
2011001	10000	11	42	0.003	0.013	0.001	0.006	0.002	0	0.001	0.001	0.01	0.001	0.006	287.004	0.902
2011001	10000	11	43	0.003	0.013	0.001	0.006	0.002	0	0.001	0.001	0.011	0.001	0.006	286.918	0.899
2011001	10000	11	44	0.004	0.014	0.001	0.006	0.002	0	0.001	0.001	0.011	0.001	0.005	286.708	0.897
2011001	10000	11	45	0.005	0.015	0.001	0.006	0.003	0	0.001	0.001	0.011	0.001	0.006	286.595	0.896
2011001	10000	11	46	0.003	0.015	0.001	0.005	0.003	0	0.001	0.001	0.01	0.001	0.006	286.477	0.892
2011001	10000	11	47	0.003	0.016	0.001	0.005	0.002	0	0.001	0.001	0.01	0.001	0.006	286.37	0.891
2011001	10000	11	48	0.004	0.018	0.001	0.006	0.003	0.001	0.001	0.001	0.011	0.001	0.006	286.245	0.888
2011001	10000	11	49	0.005	0.02	0.001	0.005	0.002	0.001	0.001	0.001	0.011	0.002	0.007	286.064	0.893
2011001	10000	11	50	0.006	0.02	0.001	0.005	0.002	0.001	0.001	0.001	0.01	0.002	0.007	285.963	0.896
2011001	10000	11	51	0.004	0.02	0.001	0.005	0.002	0.001	0.001	0.001	0.01	0.002	0.007	285.768	0.901
2011001	10000	11	52	0.003	0.02	0.001	0.005	0.002	0.001	0.001	0.001	0.01	0.002	0.007	285.594	0.906
2011001	10000	11	53	0.004	0.021	0.001	0.005	0.002	0.001	0.001	0.001	0.009	0.002	0.007	285.454	0.908
2011001	10000	11	54	0.004	0.022	0.001	0.005	0.002	0.001	0.001	0.001	0.009	0.002	0.007	285.25	0.908
2011001	10000	11	55	0.004	0.026	0.001	0.004	0.001	0.001	0.001	0.001	0.009	0.002	0.007	285.065	0.911
2011001	10000	11	56	0.004	0.03	0.001	0.004	0.001	0.001	0.001	0.001	0.01	0.002	0.007	284.942	0.911
2011001	10000	11	57	0.005	0.031	0.001	0.004	0.001	0	0.001	0.001	0.01	0.002	0.007	284.745	0.914
2011001	10000	11	58	0.005	0.031	0.001	0.004	0.001	0	0.001	0.001	0.01	0.001	0.007	284.589	0.917
2011001	10000	11	59	0.006	0.027	0.001	0.004	0.001	0	0.001	0.001	0.01	0.001	0.006	284.457	0.918
2011001	10000	11	60	0.007	0.024	0.001	0.004	0.001	0	0.001	0.001	0.009	0.001	0.006	284.266	0.92
2011001	10000	11	61	0.008	0.021	0	0.004	0.001	0	0	0.001	0.009	0.001	0.005	284.176	0.921
2011001	10000	11	62	0.004	0.016	0	0.003	0.001	0	0	0.001	0.008	0.001	0.005	284.064	0.924
2011001	10000	11	63	0.003	0.013	0	0.003	0.001	0	0	0.001	0.008	0.001	0.005	284.043	0.925
2011001	10000	11	64	0.002	0.01	0	0.003	0.001	0	0	0	0.008	0	0.005	283.967	0.925
2011001	10000	11	65	0.002	0.01	0	0.003	0.001	0	0	0	0.007	0	0.005	283.867	0.927
2011001	10000	11	66	0.002	0.009	0	0.003	0.001	0	0	0	0.007	0	0.005	283.807	0.924
2011001	10000	11	67	0.002	0.008	0	0.003	0.001	0	0	0	0.008	0	0.005	283.701	0.923
2011001	10000	11	68	0.002	0.008	0	0.003	0.001	0	0	0	0.007	0	0.005	283.491	0.922
2011001	10000	11	69	0.001	0.007	0	0.003	0.001	0	0	0	0.007	0	0.004	283.342	0.922
2011001	10000	11	70	0.001	0.006	0	0.003	0.001	0	0	0	0.007	0	0.004	283.158	0.923
2011001	10000	11	71	0.001	0.005	0	0.003	0.001	0	0	0	0.007	0	0.004	283.095	0.92
2011001	10000	11	72	0.001	0.005	0	0.003	0.001	0	0	0	0.007	0	0.004	283.175	0.918
2011001	10000	11	73	0.001	0.005	0	0.003	0.001	0	0	0	0.008	0	0.004	283.151	0.915
2011001	10000	11	74	0.001	0.005	0	0.003	0.001	0	0	0.001	0.008	0	0.005	283.127	0.913
2011001	10000	11	75	0.001	0.005	0	0.003	0.001	0	0	0.001	0.008	0	0.005	283.057	0.91
2011001	10000	11	76	0.001	0.005	0	0.003	0.001	0	0	0.001	0.009	0	0.005	282.881	0.906
2011001	10000	11	77	0.001	0.005	0	0.003	0.001	0	0	0	0.009	0	0.005	282.723	0.905
2011001	10000	11	78	0.001	0.005	0	0.003	0.001	0	0	0	0.009	0	0.005	282.655	0.903
2011001	10000	11	79	0.001	0.005	0	0.003	0.001	0	0	0	0.009	0	0.005	282.538	0.905
2011001	10000	11	80	0.001	0.006	0	0.003	0.001	0	0	0	0.009	0	0.006	282.503	0.903
2011001	10000	11	81	0.001	0.006	0	0.003	0.001	0	0	0	0.009	0	0.005	282.414	0.906
2011001	10000	11	82	0.001	0.005	0	0.004	0.001	0	0	0	0.01	0	0.005	282.264	0.911
2011001	10000	11	83	0.001	0.005	0	0.004	0.001	0	0.001	0	0.01	0	0.006	282.209	0.912
2011001	10000	11	84	0.001	0.005	0	0.004	0.001	0	0.001	0	0.01	0	0.006	282.139	0.913
2011001	10000	11	85	0.001	0.004	0	0.004	0.001	0	0.001	0	0.01	0	0.006	282.002	0.915
2011001	10000	11	86	0.001	0.004	0	0.004	0.001	0	0.001	0	0.01	0	0.006	281.952	0.914
2011001	10000	11	87	0.001	0.004	0	0.004	0.001	0	0.001	0	0.01	0	0.006	281.814	0.916
2011001	10000	11	88	0.001	0.004	0	0.004	0.001	0	0.001	0	0.01	0	0.006	281.692	0.917
2011001	10000	11	89	0.001	0.004	0	0.004	0.001	0	0.001	0	0.01	0	0.006	281.63	0.92
2011001	10000	11	90	0.001	0.004	0	0.004	0.001	0	0.001	0	0.01	0	0.006	281.561	0.919
2011001	10000	11	91	0.001	0.004	0	0.004	0.001	0	0.001	0	0.01	0	0.005	281.426	0.921
2011001	10000	11	92	0.001	0.004	0	0.004	0.001	0	0.001	0	0.009	0	0.005	281.36	0.919
2011001	10000	11	93	0.001	0.004	0	0.004	0.001	0	0.001	0	0.01	0	0.005	281.21	0.92
2011001	10000	11	94	0.002	0.004	0	0.004	0.001	0	0.001	0	0.01	0	0.005	281.084	0.919
2011001	10000	11	95	0.003	0.005	0	0.004	0.001	0	0.001	0	0.01	0	0.005	281.044	0.915
2011001	10000	11	96	0.006	0.006	0	0.004	0.001	0	0.001	0	0.01	0	0.005	280.942	0.908
2011001	10000	11	97	0.007	0.006	0	0.005	0.001	0	0.001	0	0.011	0	0.005	280.813	0.905
2011001	10000	11	98	0.004	0.006	0	0.005	0.001	0	0.001	0	0.012	0	0.006	280.717	0.9
2011001	10000	11	99	0.004	0.006	0	0.005	0.001	0	0.001	0	0.012	0	0.006	280.587	0.893
2011001	10000	11	100	0.003	0.006	0	0.005	0.001	0	0.001	0	0.012	0	0.006	280.412	0.888
2011001	10000	11	101	0.002	0.006	0	0.005	0.001	0	0.001	0	0.011	0	0.005	280.175	0.888
2011001	10000	11	102	0.002	0.005	0	0.005	0.001	0	0.001	0	0.011	0	0.005	279.899	0.885
2011001	10000	11	103	0.001	0.004	0	0.005	0.001	0	0.001	0	0.011	0	0.005	279.742	0.883
2011001	10000	11	104	0.001	0.004	0	0.005	0.002	0	0.001	0	0.011	0	0.005	279.683	0.877
2011001	10000	11	105	0.001	0.003	0	0.005	0.002	0	0.001	0	0.011	0	0.005	279.725	0.869
2011001	10000	11	106	0.001	0.003	0	0.005	0.002	0	0.001	0	0.01	0	0.005	279.818	0.861
2011001	10000	11	107	0.001	0.003	0	0.005	0.002	0	0.001	0	0.01	0	0.005	279.749	0.856
2011001	10000	11	108	0.001	0.002	0	0.005	0.002	0	0.001	0	0.01	0	0.005	279.508	0.851
2011001	10000	11	109	0.001	0.002	0	0.005	0.001	0	0.001	0	0.01	0	0.004	279.176	0.852
2011001	10000	11	110	0.002	0.002	0	0.004	0.001	0	0	0	0.009	0	0.004	278.446	0.86
2011001	10000	11	111	0.001	0.001	0	0.003	0	0	0	0	0.009	0	0.004	275.546	0.927
2011001	10000	11	112	0.002	0.001	0	0.002	0	0	0	0	0.008	0	0.004	275.22	0.931
2011001	10000	12	1	0	0.002	0	0.002	0.001	0	0	0	0.007	0	0.003	291.752	0.841
2011001	10000	12	2	0	0.002	0	0.002	0.001	0	0	0	0.007	0	0.003	291.483	0.84
2011001	10000	12	3	0	0.003	0	0.002	0.001	0	0	0	0.006	0	0.003	291.345	0.839
2011001	10000	12	4	0	0.003	0	0.002	0.001	0	0	0	0.006	0	0.003	291.122	0.839
2011001	10000	12	5	0	0.003	0	0.002	0.001	0	0	0	0.006	0	0.003	290.96	0.841
2011001	10000	12	6	0	0.003	0	0.002	0.001	0	0	0	0.006	0	0.003	290.787	0.84
2011001	10000	12	7	0	0.003	0	0.002	0.001	0	0	0	0.006	0	0.003	290.626	0.843
2011001	10000	12	8	0	0.003	0	0.002	0.001	0	0	0	0.006	0	0.003	290.493	0.84
2011001	10000	12	9	0	0.003	0	0.002	0.001	0	0	0	0.006	0	0.003	290.327	0.841
2011001	10000	12	10	0	0.003	0	0.002	0.001	0	0	0	0.006	0	0.004	290.215	0.843
2011001	10000	12	11	0	0.004	0	0.001	0.001	0	0	0	0.006	0	0.004	290.103	0.845
2011001	10000	12	12	0	0.004	0	0.001	0.001	0	0	0	0.006	0	0.004	290.012	0.845
2011001	10000	12	13	0	0.004	0	0.001	0.001	0	0	0	0.006	0	0.004	289.8	0.855
2011001	10000	12	14	0	0.004	0	0.001	0.001	0	0	0	0.006	0	0.004	289.689	0.856
2011001	10000	12	15	0	0.004	0	0.002	0.001	0	0	0	0.006	0	0.004	289.537	0.862
2011001	10000	12	16	0	0.005	0	0.002	0.001	0	0	0	0.006	0	0.004	289.394	0.868
2011001	10000	12	17	0	0.005	0	0.002	0.001	0	0	0	0.006	0	0.004	289.187	0.877
2011001	10000	12	18	0	0.005	0	0.002	0.001	0	0	0	0.006	0	0.004	288.98	0.882
2011001	10000	12	19	0	0.005	0	0.002	0.001	0	0	0	0.006	0	0.004	288.861	0.883
2011001	10000	12	20	0	0.005	0	0.002	0.001	0	0	0	0.006	0	0.004	288.715	0.884
2011001	10000	12	21	0	0.005	0	0.002	0.001	0	0	0	0.006	0	0.004	288.563	0.888
2011001	10000	12	22	0	0.005	0	0.002	0.001	0	0	0	0.007	0	0.005	288.419	0.889
2011001	10000	12	23	0	0.005	0	0.002	0.001	0	0	0	0.007	0	0.005	288.264	0.891
2011001	10000	12	24	0	0.005	0	0.002	0.001	0	0	0	0.007	0	0.005	288.176	0.889
2011001	10000	12	25	0	0.005	0	0.002	0.001	0	0	0	0.007	0	0.005	288.036	0.89
2011001	10000	12	26	0	0.005	0	0.003	0.001	0	0	0	0.008	0	0.005	287.929	0.892
2011001	10000	12	27	0	0.005	0	0.003	0.001	0	0	0	0.008	0	0.005	287.829	0.893
2011001	10000	12	28	0	0.005	0	0.003	0.001	0	0	0	0.008	0	0.005	287.728	0.896
2011001	10000	12	29	0	0.005	0	0.003	0.001	0	0	0	0.008	0	0.005	287.629	0.898
2011001	10000	12	30	0	0.006	0	0.004	0.001	0	0	0	0.009	0	0.005	287.517	0.899
2011001	10000	12	31	0	0.005	0	0.004	0.001	0	0.001	0	0.009	0	0.005	287.465	0.902
2011001	10000	12	32	0	0.006	0	0.004	0.001	0	0.001	0.001	0.01	0	0.005	287.376	0.904
2011001	10000	12	33	0.001	0.006	0	0.005	0.001	0	0.001	0.001	0.01	0.001	0.005	287.346	0.906
2011001	10000	12	34	0.001	0.007	0	0.005	0.001	0	0.001	0.001	0.011	0.001	0.005	287.373	0.909
2011001	10000	12	35	0.001	0.008	0	0.005	0.002	0	0.001	0.001	0.011	0.001	0.006	287.358	0.911
2011001	10000	12	36	0.001	0.009	0	0.005	0.002	0	0.001	0.001	0.011	0.001	0.006	287.404	0.91
2011001	10000	12	37	0.001	0.011	0	0.005	0.002	0	0.001	0.001	0.011	0.001	0.006	287.302	0.912
2011001	10000	12	38	0.001	0.014	0	0.006	0.002	0	0.001	0.001	0.011	0.001	0.006	287.29	0.909
2011001	10000	12	39	0.002	0.015	0	0.006	0.002	0	0.001	0.001	0.011	0.001	0.006	287.202	0.91
2011001	10000	12	40	0.002	0.015	0	0.006	0.002	0	0.001	0.001	0.011	0.001	0.006	287.087	0.906
2011001	10000	12	41	0.003	0.015	0.001	0.006	0.002	0	0.001	0.001	0.011	0.001	0.006	287.057	0.902
2011001	10000	12	42	0.003	0.014	0.001	0.006	0.002	0	0.001	0.001	0.011	0.001	0.006	286.953	0.899
2011001	10000	12	43	0.004	0.014	0.001	0.006	0.002	0	0.001	0.001	0.011	0.001	0.006	286.762	0.899
2011001	10000	12	44	0.005	0.015	0.001	0.006	0.003	0	0.001	0.001	0.011	0.001	0.006	286.642	0.899
2011001	10000	12	45	0.005	0.016	0.001	0.006	0.003	0	0.001	0.001	0.01	0.001	0.006	286.519	0.895
2011001	10000	12	46	0.003	0.017	0.001	0.006	0.003	0.001	0.001	0.001	0.01	0.001	0.006	286.443	0.891
2011001	10000	12	47	0.004	0.019	0.001	0.005	0.003	0.001	0.001	0.001	0.01	0.001	0.006	286.276	0.885
2011001	10000	12	48	0.005	0.02	0.001	0.005	0.003	0.001	0.001	0.001	0.011	0.001	0.007	286.104	0.886
2011001	10000	12	49	0.006	0.022	0.001	0.005	0.003	0.001	0.001	0.001	0.011	0.002	0.007	286.039	0.883
2011001	10000	12	50	0.007	0.022	0.001	0.005	0.002	0.001	0.001	0.002	0.01	0.002	0.007	285.837	0.888
2011001	10000	12	51	0.004	0.022	0.001	0.005	0.002	0.001	0.001	0.002	0.01	0.003	0.008	285.694	0.892
2011001	10000	12	52	0.004	0.023	0.001	0.005	0.002	0.001	0.001	0.002	0.01	0.004	0.008	285.575	0.896
2011001	10000	12	53	0.005	0.024	0.001	0.004	0.002	0.001	0.001	0.002	0.009	0.004	0.008	285.377	0.9
2011001	10000	12	54	0.005	0.027	0.001	0.004	0.002	0.001	0.001	0.002	0.009	0.004	0.007	285.252	0.901
2011001	10000	12	55	0.005	0.028	0.001	0.004	0.002	0.001	0.001	0.002	0.009	0.005	0.007	285.113	0.902
2011001	10000	12	56	0.005	0.032	0.001	0.004	0.001	0.001	0.001	0.002	0.009	0.006	0.007	284.923	0.904
2011001	10000	12	57	0.006	0.038	0.001	0.003	0.001	0.001	0.001	0.002	0.009	0.006	0.008	284.72	0.912
2011001	10000	12	58	0.008	0.044	0.001	0.003	0.001	0.001	0.001	0.002	0.01	0.005	0.008	284.625	0.914
2011001	10000	12	59	0.01	0.042	0.001	0.003	0.001	0.001	0.001	0.002	0.01	0.005	0.008	284.415	0.918
2011001	10000	12	60	0.012	0.034	0.001	0.003	0.001	0.001	0	0.002	0.01	0.01	0.008	284.201	0.923
2011001	10000	12	61	0.009	0.029	0.001	0.003	0.001	0	0	0.001	0.009	0.006	0.007	284.043	0.925
2011001	10000	12	62	0.006	0.024	0.001	0.003	0.001	0	0	0.001	0.008	0.002	0.006	283.874	0.927
2011001	10000	12	63	0.004	0.019	0	0.003	0.001	0	0	0.001	0.008	0.002	0.006	283.895	0.93
2011001	10000	12	64	0.004	0.014	0	0.003	0.001	0	0	0.001	0.008	0.001	0.006	283.825	0.927
2011001	10000	12	65	0.004	0.013	0	0.003	0.001	0	0	0.001	0.008	0.001	0.006	283.767	0.926
2011001	10000	12	66	0.005	0.012	0	0.003	0.001	0	0	0.001	0.008	0.001	0.006	283.713	0.925
2011001	10000	12	67	0.005	0.012	0	0.003	0.001	0	0	0.001	0.008	0.001	0.006	283.576	0.92
2011001	10000	12	68	0.005	0.012	0	0.003	0.001	0	0	0.001	0.008	0.001	0.006	283.404	0.916
2011001	10000	12	69	0.005	0.012	0	0.003	0.001	0	0	0.001	0.008	0.001	0.005	283.214	0.912
2011001	10000	12	70	0.004	0.01	0	0.003	0.001	0	0	0.001	0.008	0	0.005	283.05	0.912
2011001	10000	12	71	0.003	0.008	0	0.003	0.001	0	0	0.001	0.008	0	0.005	283.027	0.913
2011001	10000	12	72	0.002	0.007	0	0.003	0.001	0	0	0.001	0.008	0	0.004	283.224	0.914
2011001	10000	12	73	0.002	0.006	0	0.003	0.001	0	0	0.001	0.008	0	0.004	283.428	0.91
2011001	10000	12	74	0.002	0.006	0	0.003	0.001	0	0	0.001	0.008	0	0.005	283.43	0.91
2011001	10000	12	75	0.002	0.006	0	0.003	0.001	0	0	0.001	0.008	0	0.005	283.364	0.908
2011001	10000	12	76	0.001	0.006	0	0.003	0.001	0	0	0.001	0.008	0	0.005	283.113	0.905
2011001	10000	12	77	0.001	0.006	0	0.003	0.001	0	0	0.001	0.009	0.001	0.005	282.806	0.899
2011001	10000	12	78	0.001	0.006	0	0.003	0.001	0	0	0.001	0.009	0.001	0.005	282.621	0.895
2011001	10000	12	79	0.001	0.007	0	0.003	0.001	0	0	0.001	0.009	0	0.006	282.568	0.896
2011001	10000	12	80	0.001	0.007	0	0.003	0.001	0	0	0.001	0.009	0	0.006	282.458	0.899
2011001	10000	12	81	0.001	0.006	0	0.004	0.001	0	0	0	0.009	0	0.005	282.372	0.901
2011001	10000	12	82	0.001	0.006	0	0.004	0.001	0	0.001	0.001	0.01	0.001	0.005	282.27	0.905
2011001	10000	12	83	0.001	0.006	0	0.004	0.001	0	0.001	0.001	0.01	0.001	0.005	282.147	0.909
2011001	10000	12	84	0.001	0.006	0	0.004	0.001	0	0.001	0.001	0.01	0	0.006	282.085	0.909
2011001	10000	12	85	0.001	0.006	0	0.004	0.001	0	0.001	0	0.01	0	0.006	282.019	0.91
2011001	10000	12	86	0.001	0.005	0	0.005	0.001	0	0.001	0	0.01	0	0.006	281.887	0.911
2011001	10000	12	87	0.001	0.005	0	0.005	0.001	0	0.001	0	0.01	0	0.006	281.741	0.914
2011001	10000	12	88	0.001	0.005	0	0.004	0.001	0	0.001	0	0.01	0	0.006	281.717	0.914
2011001	10000	12	89	0.001	0.005	0	0.004	0.001	0	0.001	0	0.01	0	0.006	281.539	0.916
2011001	10000	12	90	0.001	0.005	0	0.004	0.001	0	0.001	0	0.01	0	0.006	281.459	0.919
2011001	10000	12	91	0.001	0.005	0	0.004	0.001	0	0.001	0	0.01	0	0.005	281.354	0.918
2011001	10000	12	92	0.001	0.005	0	0.004	0.001	0	0.001	0	0.01	0	0.005	281.296	0.914
2011001	10000	12	93	0.002	0.006	0	0.004	0.001	0	0.001	0	0.01	0	0.005	281.196	0.914
2011001	10000	12	94	0.003	0.006	0	0.004	0.001	0	0.001	0	0.01	0	0.005	281.085	0.914
2011001	10000	12	95	0.004	0.006	0	0.005	0.001	0	0.001	0	0.01	0	0.005	281.018	0.908
2011001	10000	12	96	0.007	0.007	0	0.005	0.001	0	0.001	0	0.01	0	0.005	280.92	0.904
2011001	10000	12	97	0.005	0.006	0	0.004	0.001	0	0.001	0	0.011	0	0.005	280.783	0.903
2011001	10000	12	98	0.005	0.007	0	0.005	0.001	0	0.001	0	0.012	0	0.006	280.638	0.897
2011001	10000	12	99	0.003	0.007	0	0.005	0.001	0	0.001	0	0.012	0	0.006	280.466	0.893
2011001	10000	12	100	0.002	0.007	0	0.005	0.001	0	0.001	0	0.012	0	0.006	280.265	0.891
2011001	10000	12	101	0.002	0.007	0	0.005	0.001	0	0.001	0	0.011	0	0.005	279.931	0.89
2011001	10000	12	102	0.001	0.005	0	0.005	0.001	0	0.001	0	0.011	0	0.005	279.55	0.891
2011001	10000	12	103	0.001	0.005	0	0.005	0.001	0	0.001	0	0.01	0	0.005	279.293	0.889
2011001	10000	12	104	0.001	0.004	0	0.005	0.002	0	0.001	0	0.01	0	0.005	279.28	0.881
2011001	10000	12	105	0.001	0.003	0	0.005	0.002	0	0.001	0	0.01	0	0.005	279.458	0.872
2011001	10000	12	106	0.001	0.003	0	0.005	0.002	0	0.001	0	0.01	0	0.005	279.662	0.86
2011001	10000	12	107	0.001	0.003	0	0.005	0.002	0	0.001	0	0.01	0	0.004	279.759	0.849
2011001	10000	12	108	0.001	0.002	0	0.005	0.002	0	0.001	0	0.01	0	0.004	279.437	0.848
2011001	10000	12	109	0.002	0.002	0	0.004	0.002	0	0.001	0	0.009	0	0.004	279.014	0.847
2011001	10000	12	110	0.002	0.002	0	0.004	0.002	0	0	0	0.009	0	0.004	278.599	0.839
2011001	10000	12	111	0.003	0.002	0	0.004	0.001	0	0	0	0.009	0	0.004	277.629	0.844
2011001	10000	12	112	0.004	0.002	0	0.003	0.001	0	0	0	0.008	0	0.004	277.311	0.85
2011001	10000	13	1	0	0.002	0	0.002	0.001	0	0	0	0.007	0	0.003	291.601	0.845
2011001	10000	13	2	0	0.003	0	0.002	0.001	0	0	0	0.007	0	0.003	291.438	0.842
2011001	10000	13	3	0	0.003	0	0.002	0.001	0	0	0	0.007	0	0.003	291.235	0.84
2011001	10000	13	4	0	0.003	0	0.002	0.001	0	0	0	0.006	0	0.003	291.066	0.841
2011001	10000	13	5	0	0.003	0	0.002	0.001	0	0	0	0.006	0	0.003	290.828	0.844
2011001	10000	13	6	0	0.003	0	0.002	0.001	0	0	0	0.006	0	0.003	290.661	0.844
2011001	10000	13	7	0	0.003	0	0.002	0.001	0	0	0	0.006	0	0.003	290.494	0.845
2011001	10000	13	8	0	0.003	0	0.002	0.001	0	0	0	0.006	0	0.003	290.347	0.845
2011001	10000	13	9	0	0.003	0	0.002	0.001	0	0	0	0.006	0	0.003	290.223	0.847
2011001	10000	13	10	0	0.003	0	0.002	0.001	0	0	0	0.006	0	0.004	290.042	0.852
2011001	10000	13	11	0	0.004	0	0.001	0.001	0	0	0	0.006	0	0.004	289.998	0.851
2011001	10000	13	12	0	0.004	0	0.001	0.001	0	0	0	0.006	0	0.004	289.843	0.855
2011001	10000	13	13	0	0.004	0	0.001	0.001	0	0	0	0.006	0	0.004	289.736	0.858
2011001	10000	13	14	0	0.004	0	0.002	0.001	0	0	0	0.006	0	0.004	289.522	0.867
2011001	10000	13	15	0	0.004	0	0.002	0.001	0	0	0	0.006	0	0.004	289.377	0.87
2011001	10000	13	16	0	0.005	0	0.002	0.001	0	0	0	0.006	0	0.004	289.228	0.877
2011001	10000	13	17	0	0.005	0	0.002	0.001	0	0	0	0.006	0	0.004	289.057	0.882
2011001	10000	13	18	0	0.005	0	0.002	0.001	0	0	0	0.006	0	0.004	288.894	0.888
2011001	10000	13	19	0	0.005	0	0.002	0.001	0	0	0	0.006	0	0.004	288.709	0.888
2011001	10000	13	20	0	0.004	0	0.002	0.001	0	0	0	0.006	0	0.004	288.543	0.893
2011001	10000	13	21	0	0.005	0	0.002	0.001	0	0	0	0.006	0	0.004	288.411	0.893
2011001	10000	13	22	0	0.005	0	0.002	0.001	0	0	0	0.007	0	0.004	288.287	0.894
2011001	10000	13	23	0	0.005	0	0.002	0.001	0	0	0	0.007	0	0.005	288.155	0.894
2011001	10000	13	24	0	0.005	0	0.002	0.001	0	0	0	0.007	0	0.005	288.01	0.895
2011001	10000	13	25	0	0.006	0	0.003	0.001	0	0	0	0.008	0	0.005	287.91	0.896
2011001	10000	13	26	0	0.006	0	0.003	0.001	0	0	0	0.008	0	0.005	287.805	0.895
2011001	10000	13	27	0	0.006	0	0.003	0.001	0	0	0	0.008	0	0.005	287.709	0.894
2011001	10000	13	28	0	0.005	0	0.003	0.001	0	0	0	0.008	0	0.005	287.63	0.899
2011001	10000	13	29	0	0.005	0	0.003	0.001	0	0	0	0.008	0	0.005	287.492	0.902
2011001	10000	13	30	0	0.005	0	0.004	0.001	0	0	0	0.008	0	0.005	287.435	0.904
2011001	10000	13	31	0	0.005	0	0.004	0.001	0	0.001	0	0.009	0	0.005	287.304	0.906
2011001	10000	13	32	0	0.006	0	0.004	0.001	0	0.001	0.001	0.01	0	0.005	287.26	0.906
2011001	10000	13	33	0	0.007	0	0.005	0.001	0	0.001	0.001	0.01	0.001	0.005	287.245	0.91
2011001	10000	13	34	0.001	0.008	0	0.005	0.001	0	0.001	0.001	0.011	0.001	0.006	287.217	0.914
2011001	10000	13	35	0.001	0.009	0	0.005	0.002	0	0.001	0.001	0.011	0.001	0.006	287.209	0.917
2011001	10000	13	36	0.001	0.009	0	0.005	0.002	0	0.001	0.001	0.011	0.001	0.006	287.255	0.915
2011001	10000	13	37	0.001	0.011	0	0.006	0.002	0	0.001	0.001	0.011	0.001	0.006	287.239	0.913
2011001	10000	13	38	0.002	0.014	0	0.006	0.002	0	0.001	0.001	0.011	0.001	0.006	287.196	0.912
2011001	10000	13	39	0.002	0.016	0	0.006	0.002	0	0.001	0.001	0.011	0.001	0.006	287.091	0.91
2011001	10000	13	40	0.003	0.016	0	0.006	0.002	0	0.001	0.001	0.011	0.001	0.006	287.111	0.902
2011001	10000	13	41	0.003	0.015	0.001	0.006	0.002	0	0.001	0.001	0.011	0.001	0.006	286.971	0.9
2011001	10000	13	42	0.004	0.017	0.001	0.006	0.003	0	0.001	0.001	0.011	0.001	0.006	286.818	0.899
2011001	10000	13	43	0.005	0.016	0.001	0.006	0.003	0	0.001	0.001	0.011	0.001	0.006	286.748	0.897
2011001	10000	13	44	0.005	0.016	0.001	0.006	0.003	0	0.001	0.001	0.01	0.001	0.006	286.545	0.897
2011001	10000	13	45	0.005	0.016	0.001	0.006	0.003	0.001	0.001	0.001	0.01	0.001	0.006	286.426	0.893
2011001	10000	13	46	0.003	0.017	0.001	0.006	0.003	0.001	0.001	0.001	0.01	0.001	0.006	286.324	0.891
2011001	10000	13	47	0.004	0.02	0.001	0.006	0.003	0.001	0.001	0.001	0.01	0.001	0.006	286.148	0.886
2011001	10000	13	48	0.005	0.022	0.001	0.005	0.003	0.001	0.001	0.002	0.01	0.002	0.007	286.046	0.881
2011001	10000	13	49	0.007	0.024	0.001	0.005	0.003	0.001	0.001	0.002	0.011	0.002	0.007	285.803	0.881
2011001	10000	13	50	0.007	0.024	0.001	0.005	0.003	0.001	0.001	0.002	0.01	0.002	0.008	285.709	0.879
2011001	10000	13	51	0.005	0.025	0.001	0.004	0.002	0.001	0.001	0.002	0.01	0.004	0.008	285.613	0.882
2011001	10000	13	52	0.006	0.026	0.001	0.004	0.002	0.001	0.001	0.002	0.01	0.006	0.009	285.432	0.887
2011001	10000	13	53	0.007	0.028	0.001	0.004	0.002	0.001	0.001	0.002	0.01	0.007	0.009	285.349	0.893
2011001	10000	13	54	0.007	0.029	0.001	0.004	0.002	0.001	0.001	0.002	0.01	0.01	0.01	285.23	0.891
2011001	10000	13	55	0.008	0.033	0.002	0.003	0.002	0.001	0.001	0.002	0.009	0.01	0.01	285.098	0.886
2011001	10000	13	56	0.009	0.04	0.002	0.003	0.002	0.001	0.001	0.002	0.009	0.01	0.01	285.031	0.893
2011001	10000	13	57	0.01	0.043	0.002	0.003	0.002	0.001	0.001	0.003	0.01	0.015	0.011	284.926	0.899
2011001	10000	13	58	0.013	0.046	0.003	0.003	0.002	0.001	0.001	0.003	0.01	0.022	0.013	284.798	0.904
2011001	10000	13	59	0.017	0.041	0.002	0.003	0.002	0.001	0.001	0.003	0.01	0.028	0.015	284.628	0.904
2011001	10000	13	60	0.021	0.032	0.001	0.002	0.001	0.001	0	0.003	0.01	0.028	0.015	284.214	0.916
2011001	10000	13	61	0.015	0.029	0.001	0.002	0.001	0.001	0	0.002	0.01	0.018	0.011	283.857	0.926
2011001	10000	13	62	0.012	0.029	0.001	0.002	0.001	0	0	0.001	0.009	0.003	0.008	283.695	0.929
2011001	10000	13	63	0.01	0.024	0.001	0.002	0.001	0	0	0.001	0.009	0.003	0.009	283.797	0.923
2011001	10000	13	64	0.01	0.02	0.001	0.002	0.001	0	0	0.001	0.008	0.003	0.009	283.763	0.914
2011001	10000	13	65	0.009	0.018	0.001	0.002	0.001	0	0	0.001	0.009	0.002	0.009	283.767	0.9
2011001	10000	13	66	0.009	0.018	0.001	0.002	0.001	0	0	0.001	0.009	0.001	0.008	283.916	0.89
2011001	10000	13	67	0.008	0.019	0.001	0.002	0.001	0	0	0.001	0.008	0.002	0.008	284.027	0.888
2011001	10000	13	68	0.007	0.017	0.001	0.002	0.001	0	0	0.001	0.008	0.001	0.008	283.592	0.88
2011001	10000	13	69	0.007	0.015	0.002	0.002	0.001	0.001	0	0.001	0.008	0.001	0.008	283.608	0.856
2011001	10000	13	70	0.007	0.014	0.004	0.002	0.002	0.001	0	0.001	0.009	0.002	0.009	283.315	0.872
2011001	10000	13	71	0.007	0.012	0.001	0.002	0.001	0	0	0.001	0.009	0.001	0.006	283.092	0.895
2011001	10000	13	72	0.006	0.01	0.001	0.003	0.002	0	0	0.001	0.009	0.001	0.006	283.405	0.902
2011001	10000	13	73	0.004	0.009	0.001	0.003	0.002	0.001	0	0.001	0.009	0.001	0.005	283.68	0.902
2011001	10000	13	74	0.004	0.009	0	0.003	0.002	0.001	0	0.001	0.009	0.001	0.005	283.908	0.896
2011001	10000	13	75	0.003	0.009	0	0.003	0.002	0.001	0	0.001	0.009	0.001	0.005	283.736	0.902
2011001	10000	13	76	0.003	0.009	0	0.003	0.001	0.001	0	0.001	0.009	0.001	0.006	283.329	0.9
2011001	10000	13	77	0.002	0.009	0	0.003	0.001	0.001	0	0.001	0.009	0.001	0.006	282.974	0.882
2011001	10000	13	78	0.002	0.008	0	0.003	0.001	0	0	0.001	0.009	0.001	0.005	282.752	0.87
2011001	10000	13	79	0.002	0.008	0	0.003	0.001	0	0.001	0.001	0.009	0.001	0.005	282.588	0.875
2011001	10000	13	80	0.002	0.007	0	0.003	0.001	0	0.001	0.001	0.009	0.001	0.005	282.48	0.884
2011001	10000	13	81	0.002	0.007	0	0.004	0.001	0	0.001	0.001	0.009	0	0.005	282.39	0.893
2011001	10000	13	82	0.001	0.007	0	0.004	0.001	0	0.001	0.001	0.009	0.001	0.005	282.244	0.9
2011001	10000	13	83	0.001	0.007	0	0.004	0.001	0	0.001	0.001	0.01	0.001	0.005	282.167	0.902
2011001	10000	13	84	0.001	0.008	0	0.004	0.001	0	0.001	0.001	0.01	0.001	0.006	282.073	0.905
2011001	10000	13	85	0.001	0.008	0	0.004	0.001	0	0.001	0.001	0.01	0	0.006	281.923	0.909
2011001	10000	13	86	0.001	0.007	0	0.005	0.001	0	0.001	0	0.01	0	0.006	281.815	0.911
2011001	10000	13	87	0.001	0.006	0	0.005	0.001	0	0.001	0	0.01	0	0.006	281.743	0.91
2011001	10000	13	88	0.001	0.006	0	0.005	0.001	0	0.001	0	0.01	0	0.006	281.634	0.91
2011001	10000	13	89	0.001	0.006	0	0.005	0.001	0	0.001	0	0.01	0	0.006	281.531	0.913
2011001	10000	13	90	0.002	0.006	0	0.004	0.001	0	0.001	0	0.01	0	0.006	281.458	0.914
2011001	10000	13	91	0.002	0.006	0	0.004	0.001	0	0.001	0	0.01	0	0.006	281.328	0.913
2011001	10000	13	92	0.002	0.006	0	0.005	0.001	0	0.001	0	0.01	0	0.006	281.26	0.911
2011001	10000	13	93	0.004	0.007	0	0.005	0.001	0	0.001	0	0.01	0	0.005	281.156	0.911
2011001	10000	13	94	0.004	0.007	0	0.005	0.001	0	0.001	0	0.01	0	0.005	281.026	0.91
2011001	10000	13	95	0.004	0.007	0	0.005	0.001	0	0.001	0	0.01	0	0.005	280.969	0.906
2011001	10000	13	96	0.008	0.008	0	0.005	0.001	0	0.001	0	0.01	0	0.005	280.928	0.904
2011001	10000	13	97	0.005	0.007	0	0.004	0.001	0	0.001	0	0.011	0	0.005	280.746	0.901
2011001	10000	13	98	0.004	0.008	0	0.005	0.001	0	0.001	0	0.011	0	0.005	280.584	0.897
2011001	10000	13	99	0.003	0.008	0	0.005	0.001	0	0.001	0	0.012	0	0.005	280.388	0.894
2011001	10000	13	100	0.002	0.008	0	0.005	0.001	0	0.001	0	0.012	0	0.006	280.115	0.892
2011001	10000	13	101	0.002	0.007	0	0.005	0.001	0	0.001	0	0.011	0	0.005	279.732	0.894
2011001	10000	13	102	0.002	0.006	0	0.005	0.001	0	0.001	0	0.011	0	0.005	279.307	0.896
2011001	10000	13	103	0.001	0.005	0	0.005	0.002	0	0.001	0	0.01	0	0.005	279.005	0.894
2011001	10000	13	104	0.001	0.004	0	0.005	0.002	0	0.001	0	0.01	0	0.004	278.968	0.89
2011001	10000	13	105	0.002	0.003	0	0.005	0.002	0	0.001	0	0.01	0	0.004	279.249	0.874
2011001	10000	13	106	0.002	0.003	0	0.005	0.002	0	0.001	0	0.01	0	0.004	279.597	0.858
2011001	10000	13	107	0.002	0.003	0	0.005	0.002	0	0.001	0	0.01	0	0.004	279.759	0.849
2011001	10000	13	108	0.002	0.003	0	0.005	0.002	0	0.001	0	0.009	0	0.004	279.5	0.839
2011001	10000	13	109	0.002	0.003	0	0.005	0.002	0	0.001	0	0.009	0	0.004	279.234	0.828
2011001	10000	13	110	0.003	0.003	0	0.004	0.002	0	0.001	0	0.009	0	0.004	279.126	0.815
2011001	10000	13	111	0.004	0.002	0	0.004	0.002	0	0	0	0.008	0	0.004	279.043	0.808
2011001	10000	13	112	0.006	0.002	0	0.004	0.002	0	0	0	0.008	0	0.003	279.051	0.808
2011001	10000	14	1	0	0.002	0	0.002	0.001	0	0	0	0.007	0	0.003	291.602	0.843
2011001	10000	14	2	0	0.003	0	0.002	0.001	0	0	0	0.007	0	0.003	291.363	0.841
2011001	10000	14	3	0	0.003	0	0.002	0.001	0	0	0	0.007	0	0.003	291.163	0.842
2011001	10000	14	4	0	0.003	0	0.002	0.001	0	0	0	0.007	0	0.003	290.974	0.841
2011001	10000	14	5	0	0.003	0	0.002	0.001	0	0	0	0.006	0	0.003	290.788	0.842
2011001	10000	14	6	0	0.003	0	0.002	0.001	0	0	0	0.006	0	0.003	290.598	0.844
2011001	10000	14	7	0	0.003	0	0.002	0.001	0	0	0	0.006	0	0.003	290.406	0.847
2011001	10000	14	8	0	0.003	0	0.002	0.001	0	0	0	0.006	0	0.003	290.283	0.848
2011001	10000	14	9	0	0.003	0	0.002	0.001	0	0	0	0.006	0	0.003	290.102	0.851
2011001	10000	14	10	0	0.003	0	0.002	0.001	0	0	0	0.006	0	0.004	289.991	0.853
2011001	10000	14	11	0	0.004	0	0.002	0.001	0	0	0	0.006	0	0.004	289.858	0.855
2011001	10000	14	12	0	0.004	0	0.001	0.001	0	0	0	0.006	0	0.004	289.764	0.859
2011001	10000	14	13	0	0.004	0	0.001	0.001	0	0	0	0.006	0	0.004	289.579	0.865
2011001	10000	14	14	0	0.004	0	0.002	0.001	0	0	0	0.007	0	0.004	289.415	0.87
2011001	10000	14	15	0	0.004	0	0.002	0.001	0	0	0	0.006	0	0.004	289.202	0.882
2011001	10000	14	16	0	0.004	0	0.002	0.001	0	0	0	0.006	0	0.004	289.012	0.89
2011001	10000	14	17	0	0.004	0	0.002	0.001	0	0	0	0.006	0	0.004	288.912	0.89
2011001	10000	14	18	0	0.004	0	0.002	0.001	0	0	0	0.006	0	0.004	288.7	0.895
2011001	10000	14	19	0	0.004	0	0.002	0.001	0	0	0	0.006	0	0.004	288.573	0.896
2011001	10000	14	20	0	0.004	0	0.002	0.001	0	0	0	0.006	0	0.004	288.4	0.897
2011001	10000	14	21	0	0.005	0	0.002	0.001	0	0	0	0.006	0	0.004	288.236	0.899
2011001	10000	14	22	0	0.005	0	0.002	0.001	0	0	0	0.007	0	0.005	288.16	0.896
2011001	10000	14	23	0	0.006	0	0.002	0.001	0	0	0	0.007	0	0.005	288.012	0.897
2011001	10000	14	24	0	0.006	0	0.002	0.001	0	0	0	0.008	0	0.005	287.901	0.899
2011001	10000	14	25	0	0.006	0	0.002	0.001	0	0	0	0.008	0	0.005	287.777	0.9
2011001	10000	14	26	0	0.006	0	0.003	0.001	0	0	0	0.008	0	0.005	287.71	0.899
2011001	10000	14	27	0	0.006	0	0.003	0.001	0	0	0	0.008	0	0.005	287.635	0.9
2011001	10000	14	28	0	0.006	0	0.003	0.001	0	0	0	0.008	0	0.005	287.517	0.9
2011001	10000	14	29	0	0.006	0	0.003	0.001	0	0	0	0.008	0	0.005	287.454	0.9
2011001	10000	14	30	0	0.005	0	0.003	0.001	0	0	0	0.008	0	0.005	287.276	0.905
2011001	10000	14	31	0	0.006	0	0.004	0.001	0	0	0	0.009	0	0.005	287.2	0.906
2011001	10000	14	32	0	0.007	0	0.004	0.001	0	0.001	0.001	0.009	0	0.005	287.153	0.909
2011001	10000	14	33	0	0.008	0	0.004	0.001	0	0.001	0.001	0.01	0.001	0.006	287.138	0.912
2011001	10000	14	34	0.001	0.009	0	0.005	0.001	0	0.001	0.001	0.011	0.001	0.006	287.159	0.915
2011001	10000	14	35	0.001	0.011	0	0.005	0.002	0	0.001	0.001	0.012	0.001	0.006	287.155	0.917
2011001	10000	14	36	0.001	0.012	0	0.005	0.002	0	0.001	0.001	0.011	0.001	0.006	287.163	0.916
2011001	10000	14	37	0.001	0.012	0	0.006	0.002	0	0.001	0.001	0.011	0.001	0.006	287.137	0.915
2011001	10000	14	38	0.002	0.014	0	0.006	0.002	0	0.001	0.001	0.011	0.001	0.006	287.019	0.918
2011001	10000	14	39	0.002	0.017	0	0.006	0.002	0	0.001	0.001	0.011	0.001	0.006	287.072	0.908
2011001	10000	14	40	0.003	0.015	0	0.006	0.002	0.001	0.001	0.001	0.011	0.001	0.006	286.976	0.905
2011001	10000	14	41	0.003	0.018	0.001	0.006	0.002	0.001	0.001	0.001	0.011	0.001	0.006	286.859	0.902
2011001	10000	14	42	0.004	0.019	0.001	0.006	0.003	0.001	0.001	0.001	0.011	0.001	0.006	286.809	0.897
2011001	10000	14	43	0.005	0.018	0.001	0.006	0.003	0.001	0.001	0.001	0.01	0.001	0.006	286.625	0.896
2011001	10000	14	44	0.006	0.018	0.001	0.006	0.003	0.001	0.001	0.001	0.01	0.001	0.006	286.517	0.894
2011001	10000	14	45	0.005	0.019	0.001	0.005	0.003	0.001	0.001	0.001	0.01	0.001	0.006	286.354	0.894
2011001	10000	14	46	0.004	0.02	0.001	0.005	0.003	0.001	0.001	0.001	0.01	0.001	0.006	286.18	0.893
2011001	10000	14	47	0.005	0.023	0.001	0.005	0.003	0.001	0.001	0.002	0.01	0.002	0.007	286.025	0.893
2011001	10000	14	48	0.007	0.026	0.001	0.005	0.003	0.001	0.001	0.002	0.01	0.002	0.007	285.768	0.889
2011001	10000	14	49	0.009	0.028	0.001	0.005	0.003	0.001	0.001	0.002	0.01	0.002	0.008	285.573	0.887
2011001	10000	14	50	0.008	0.029	0.001	0.004	0.002	0.001	0.001	0.002	0.01	0.003	0.008	285.491	0.883
2011001	10000	14	51	0.007	0.031	0.001	0.004	0.002	0.001	0.001	0.002	0.01	0.003	0.009	285.433	0.88
2011001	10000	14	52	0.009	0.032	0.002	0.004	0.002	0.001	0.001	0.002	0.01	0.004	0.01	285.445	0.881
2011001	10000	14	53	0.01	0.034	0.002	0.003	0.002	0.001	0.001	0.002	0.01	0.005	0.011	285.298	0.883
2011001	10000	14	54	0.012	0.039	0.003	0.003	0.002	0.001	0.001	0.003	0.01	0.006	0.012	285.216	0.875
2011001	10000	14	55	0.015	0.043	0.003	0.003	0.002	0.001	0.001	0.003	0.01	0.01	0.013	285.172	0.865
2011001	10000	14	56	0.016	0.048	0.004	0.003	0.002	0.001	0.001	0.003	0.01	0.016	0.016	285.077	0.868
2011001	10000	14	57	0.018	0.05	0.004	0.002	0.003	0.001	0.001	0.004	0.01	0.024	0.02	285.134	0.879
2011001	10000	14	58	0.019	0.049	0.004	0.002	0.003	0.002	0.001	0.005	0.01	0.041	0.027	285.129	0.886
2011001	10000	14	59	0.024	0.044	0.003	0.002	0.003	0.002	0.001	0.006	0.01	0.051	0.033	284.866	0.88
2011001	10000	14	60	0.029	0.033	0.003	0.002	0.002	0.002	0.001	0.007	0.01	0.043	0.025	284.263	0.899
2011001	10000	14	61	0.016	0.032	0.002	0.002	0.001	0.001	0	0.003	0.009	0.028	0.019	283.609	0.925
2011001	10000	14	62	0.012	0.028	0.004	0.002	0.002	0.001	0	0.003	0.009	0.027	0.022	283.56	0.919
2011001	10000	14	63	0.007	0.023	0.006	0.001	0.002	0.001	0	0.002	0.008	0.016	0.02	283.729	0.892
2011001	10000	14	64	0.004	0.012	0.005	0.001	0.001	0.001	0	0.002	0.007	0.012	0.018	282.12	0.881
2011001	10000	14	65	0.005	0.009	0.008	0.001	0.001	0.001	0	0.001	0.007	0.008	0.016	282.424	0.83
2011001	10000	14	66	0.008	0.008	0.008	0.001	0.001	0.001	0	0.001	0.007	0.005	0.013	282.748	0.816
2011001	10000	14	67	0.003	0.013	0.004	0.001	0.001	0.001	0	0.001	0.007	0.003	0.01	283.38	0.746
2011001	10000	14	68	0.002	0.008	0.003	0.001	0.001	0.001	0	0.001	0.007	0.002	0.01	281.845	0.84
2011001	10000	14	69	0.002	0.008	0.008	0.001	0.001	0.001	0	0.001	0.007	0.002	0.011	281.536	0.8
2011001	10000	14	70	0.003	0.005	0.057	0.001	0.002	0.002	0.001	0.003	0.008	0.009	0.016	280.825	0.826
2011001	10000	14	71	0.004	0.01	0.015	0.001	0.002	0.001	0	0.002	0.008	0.004	0.012	283.405	0.836
2011001	10000	14	72	0.004	0.011	0.003	0.002	0.002	0.001	0	0.001	0.008	0.002	0.008	283.885	0.867
2011001	10000	14	73	0.005	0.011	0.005	0.002	0.002	0.001	0.001	0.002	0.009	0.002	0.007	284.225	0.87
2011001	10000	14	74	0.005	0.011	0.004	0.002	0.003	0.001	0.001	0.002	0.009	0.001	0.006	284.462	0.871
2011001	10000	14	75	0.006	0.011	0.002	0.002	0.002	0.001	0.001	0.002	0.009	0.001	0.006	284.287	0.875
2011001	10000	14	76	0.006	0.012	0.001	0.002	0.002	0.001	0.001	0.002	0.01	0.001	0.006	283.523	0.881
2011001	10000	14	77	0.006	0.012	0	0.002	0.002	0.001	0.001	0.002	0.009	0.001	0.006	283.116	0.844
2011001	10000	14	78	0.005	0.011	0	0.003	0.002	0.001	0.001	0.001	0.009	0.001	0.006	282.929	0.817
2011001	10000	14	79	0.003	0.01	0	0.003	0.001	0.001	0.001	0.001	0.009	0.001	0.005	282.734	0.83
2011001	10000	14	80	0.003	0.009	0	0.003	0.001	0.001	0.001	0.001	0.009	0.001	0.005	282.571	0.863
2011001	10000	14	81	0.002	0.009	0	0.004	0.001	0.001	0.001	0.001	0.009	0.001	0.005	282.443	0.884
2011001	10000	14	82	0.002	0.008	0	0.004	0.001	0	0.001	0.001	0.009	0.001	0.005	282.339	0.894
2011001	10000	14	83	0.002	0.008	0	0.004	0.001	0	0.001	0.001	0.01	0.001	0.005	282.21	0.898
2011001	10000	14	84	0.002	0.009	0	0.004	0.001	0	0.001	0.001	0.01	0.001	0.005	282.034	0.9
2011001	10000	14	85	0.001	0.009	0	0.004	0.001	0	0.001	0.001	0.01	0	0.006	281.901	0.904
2011001	10000	14	86	0.002	0.009	0	0.004	0.001	0	0.001	0.001	0.01	0	0.006	281.79	0.907
2011001	10000	14	87	0.002	0.008	0	0.005	0.001	0	0.001	0	0.01	0	0.006	281.651	0.908
2011001	10000	14	88	0.001	0.007	0	0.005	0.001	0	0.001	0	0.01	0	0.006	281.563	0.908
2011001	10000	14	89	0.002	0.007	0	0.005	0.001	0	0.001	0	0.01	0	0.006	281.507	0.908
2011001	10000	14	90	0.002	0.007	0	0.004	0.001	0	0.001	0	0.01	0	0.006	281.374	0.909
2011001	10000	14	91	0.003	0.007	0	0.004	0.001	0	0.001	0	0.01	0	0.006	281.322	0.907
2011001	10000	14	92	0.003	0.008	0	0.005	0.001	0	0.001	0	0.01	0	0.006	281.193	0.909
2011001	10000	14	93	0.004	0.008	0	0.005	0.001	0	0.001	0	0.01	0	0.006	281.074	0.906
2011001	10000	14	94	0.003	0.007	0	0.005	0.001	0	0.001	0	0.01	0	0.005	281.038	0.906
2011001	10000	14	95	0.006	0.008	0	0.005	0.001	0	0.001	0	0.01	0	0.005	281.016	0.905
2011001	10000	14	96	0.007	0.008	0	0.005	0.001	0	0.001	0	0.01	0	0.005	280.914	0.906
2011001	10000	14	97	0.006	0.008	0	0.004	0.001	0	0.001	0	0.011	0	0.005	280.83	0.902
2011001	10000	14	98	0.004	0.007	0	0.004	0.001	0	0.001	0	0.011	0	0.005	280.54	0.899
2011001	10000	14	99	0.002	0.008	0	0.004	0.001	0	0.001	0	0.011	0	0.005	280.295	0.895
2011001	10000	14	100	0.002	0.008	0	0.004	0.001	0	0.001	0	0.011	0	0.005	280.047	0.894
2011001	10000	14	101	0.002	0.007	0	0.004	0.001	0	0.001	0	0.011	0	0.005	279.627	0.895
2011001	10000	14	102	0.002	0.006	0	0.005	0.001	0	0.001	0	0.01	0	0.005	279.133	0.896
2011001	10000	14	103	0.002	0.005	0	0.005	0.002	0	0.001	0	0.01	0	0.004	278.84	0.898
2011001	10000	14	104	0.002	0.004	0	0.005	0.002	0	0.001	0	0.01	0	0.004	278.883	0.889
2011001	10000	14	105	0.002	0.004	0	0.005	0.002	0	0.001	0	0.01	0	0.004	279.217	0.872
2011001	10000	14	106	0.002	0.004	0	0.005	0.002	0	0.001	0	0.01	0	0.004	279.64	0.854
2011001	10000	14	107	0.003	0.003	0	0.005	0.002	0	0.001	0	0.009	0	0.004	279.783	0.839
2011001	10000	14	108	0.003	0.003	0	0.005	0.002	0	0.001	0	0.009	0	0.004	279.567	0.827
2011001	10000	14	109	0.005	0.003	0	0.005	0.002	0	0.001	0	0.008	0	0.004	279.289	0.821
2011001	10000	14	110	0.006	0.003	0	0.004	0.002	0	0.001	0	0.008	0	0.004	279.011	0.814
2011001	10000	14	111	0.007	0.003	0	0.004	0.002	0	0.001	0	0.008	0	0.003	278.861	0.813
2011001	10000	14	112	0.011	0.002	0	0.004	0.002	0	0	0	0.007	0	0.003	278.93	0.806
2011001	10000	15	1	0	0.003	0	0.002	0.001	0	0	0	0.007	0	0.003	291.495	0.843
2011001	10000	15	2	0	0.003	0	0.002	0.001	0	0	0	0.007	0	0.003	291.313	0.841
2011001	10000	15	3	0	0.003	0	0.002	0.001	0	0	0	0.007	0	0.003	291.11	0.844
2011001	10000	15	4	0	0.003	0	0.002	0.001	0	0	0	0.007	0	0.003	290.879	0.847
2011001	10000	15	5	0	0.003	0	0.002	0.001	0	0	0	0.007	0	0.003	290.688	0.845
2011001	10000	15	6	0	0.003	0	0.002	0.001	0	0	0	0.007	0	0.003	290.503	0.846
2011001	10000	15	7	0	0.003	0	0.002	0.001	0	0	0	0.006	0	0.003	290.313	0.849
2011001	10000	15	8	0	0.003	0	0.002	0.001	0	0	0	0.006	0	0.003	290.165	0.853
2011001	10000	15	9	0	0.003	0	0.002	0.001	0	0	0	0.006	0	0.004	290.03	0.855
2011001	10000	15	10	0	0.004	0	0.002	0.001	0	0	0	0.007	0	0.004	289.877	0.859
2011001	10000	15	11	0	0.004	0	0.002	0.001	0	0	0	0.007	0	0.004	289.743	0.86
2011001	10000	15	12	0	0.004	0	0.002	0.001	0	0	0	0.007	0	0.004	289.639	0.862
2011001	10000	15	13	0	0.004	0	0.001	0.001	0	0	0	0.006	0	0.004	289.446	0.874
2011001	10000	15	14	0	0.004	0	0.002	0.001	0	0	0	0.007	0	0.004	289.265	0.879
2011001	10000	15	15	0	0.004	0	0.002	0.001	0	0	0	0.006	0	0.004	289.055	0.892
2011001	10000	15	16	0	0.004	0	0.002	0.001	0	0	0	0.006	0	0.004	288.888	0.896
2011001	10000	15	17	0	0.004	0	0.002	0.001	0	0	0	0.006	0	0.004	288.79	0.893
2011001	10000	15	18	0	0.004	0	0.002	0.001	0	0	0	0.006	0	0.004	288.624	0.897
2011001	10000	15	19	0	0.004	0	0.002	0.001	0	0	0	0.006	0	0.004	288.467	0.898
2011001	10000	15	20	0	0.004	0	0.002	0.001	0	0	0	0.006	0	0.004	288.282	0.9
2011001	10000	15	21	0	0.005	0	0.002	0.001	0	0	0	0.007	0	0.004	288.185	0.901
2011001	10000	15	22	0	0.006	0	0.002	0.001	0	0	0	0.007	0	0.005	288.046	0.9
2011001	10000	15	23	0	0.006	0	0.002	0.001	0	0	0	0.007	0	0.005	287.951	0.9
2011001	10000	15	24	0	0.007	0	0.002	0.001	0	0	0	0.007	0	0.005	287.762	0.904
2011001	10000	15	25	0	0.006	0	0.002	0.001	0	0	0	0.007	0	0.005	287.673	0.903
2011001	10000	15	26	0	0.006	0	0.002	0.001	0	0	0	0.008	0	0.005	287.603	0.903
2011001	10000	15	27	0	0.005	0	0.003	0.001	0	0	0	0.008	0	0.005	287.492	0.904
2011001	10000	15	28	0	0.005	0	0.003	0.001	0	0	0	0.008	0	0.005	287.405	0.904
2011001	10000	15	29	0	0.006	0	0.003	0.001	0	0	0	0.008	0	0.005	287.307	0.907
2011001	10000	15	30	0	0.006	0	0.003	0.001	0	0	0	0.008	0	0.005	287.216	0.906
2011001	10000	15	31	0	0.007	0	0.004	0.001	0	0	0	0.009	0	0.005	287.139	0.908
2011001	10000	15	32	0	0.008	0	0.004	0.001	0	0.001	0.001	0.01	0.001	0.006	287.086	0.911
2011001	10000	15	33	0	0.009	0	0.005	0.001	0	0.001	0.001	0.011	0.001	0.006	287.12	0.914
2011001	10000	15	34	0.001	0.01	0	0.005	0.001	0	0.001	0.001	0.012	0.001	0.006	287.122	0.915
2011001	10000	15	35	0.002	0.012	0	0.005	0.002	0	0.001	0.001	0.012	0.001	0.006	287.139	0.914
2011001	10000	15	36	0.002	0.014	0	0.005	0.002	0	0.001	0.001	0.011	0.001	0.006	287.118	0.915
2011001	10000	15	37	0.002	0.014	0	0.006	0.002	0	0.001	0.001	0.011	0.001	0.006	287.074	0.915
2011001	10000	15	38	0.002	0.014	0	0.006	0.002	0.001	0.001	0.001	0.011	0.001	0.006	287.019	0.917
2011001	10000	15	39	0.002	0.016	0	0.006	0.002	0.001	0.001	0.001	0.01	0.001	0.006	286.954	0.911
2011001	10000	15	40	0.003	0.017	0.001	0.006	0.002	0.001	0.001	0.001	0.01	0.002	0.006	286.871	0.907
2011001	10000	15	41	0.004	0.02	0.001	0.006	0.002	0.001	0.001	0.001	0.011	0.002	0.006	286.851	0.902
2011001	10000	15	42	0.005	0.022	0.001	0.006	0.003	0.001	0.001	0.001	0.01	0.002	0.006	286.693	0.897
2011001	10000	15	43	0.006	0.022	0.001	0.006	0.003	0.001	0.001	0.001	0.01	0.002	0.006	286.546	0.892
2011001	10000	15	44	0.007	0.023	0.001	0.005	0.003	0.001	0.001	0.002	0.01	0.002	0.006	286.394	0.889
2011001	10000	15	45	0.006	0.023	0.001	0.005	0.003	0.001	0.001	0.002	0.01	0.002	0.007	286.233	0.889
2011001	10000	15	46	0.005	0.026	0.001	0.005	0.003	0.001	0.001	0.002	0.01	0.002	0.007	286.098	0.899
2011001	10000	15	47	0.007	0.029	0.001	0.005	0.002	0.001	0.001	0.002	0.01	0.002	0.007	285.86	0.904
2011001	10000	15	48	0.01	0.031	0.001	0.004	0.002	0.001	0.001	0.002	0.011	0.002	0.008	285.54	0.906
2011001	10000	15	49	0.013	0.033	0.001	0.004	0.002	0.001	0.001	0.002	0.011	0.002	0.009	285.306	0.9
2011001	10000	15	50	0.012	0.034	0.001	0.004	0.002	0.001	0.001	0.002	0.011	0.003	0.01	285.213	0.891
2011001	10000	15	51	0.015	0.035	0.002	0.003	0.003	0.001	0.001	0.003	0.01	0.005	0.011	285.297	0.885
2011001	10000	15	52	0.015	0.034	0.003	0.003	0.003	0.001	0.001	0.003	0.01	0.006	0.012	285.403	0.877
2011001	10000	15	53	0.013	0.036	0.004	0.003	0.003	0.001	0.001	0.003	0.01	0.007	0.013	285.466	0.865
2011001	10000	15	54	0.013	0.039	0.006	0.002	0.003	0.001	0.001	0.003	0.01	0.009	0.015	285.41	0.842
2011001	10000	15	55	0.013	0.043	0.006	0.002	0.003	0.001	0.001	0.004	0.01	0.014	0.018	284.86	0.828
2011001	10000	15	56	0.014	0.052	0.008	0.002	0.003	0.002	0.001	0.005	0.011	0.027	0.029	284.8	0.843
2011001	10000	15	57	0.014	0.059	0.008	0.002	0.004	0.002	0.001	0.007	0.011	0.039	0.038	285.24	0.854
2011001	10000	15	58	0.02	0.046	0.009	0.002	0.005	0.003	0.001	0.01	0.011	0.073	0.054	285.79	0.783
2011001	10000	15	59	0.029	0.03	0.016	0.002	0.005	0.004	0.001	0.016	0.013	0.088	0.068	285.668	0.754
2011001	10000	15	60	0.039	0.018	0.068	0.002	0.006	0.008	0.002	0.033	0.015	0.084	0.048	284.403	0.869
2011001	10000	15	61	0.026	0.012	0.027	0.002	0.004	0.004	0.001	0.011	0.011	0.06	0.055	281.77	0.916
2011001	10000	15	62	0.011	0.008	0.08	0.002	0.004	0.004	0.001	0.011	0.009	0.058	0.051	281.718	0.891
2011001	10000	15	63	0.005	0.009	0.032	0.001	0.002	0.002	0.001	0.003	0.007	0.029	0.034	281.638	0.858
2011001	10000	15	64	0.006	0.01	0.016	0.001	0.001	0.001	0	0.002	0.006	0.015	0.022	281.508	0.806
2011001	10000	15	65	0.006	0.008	0.02	0.001	0.001	0.001	0	0.001	0.006	0.008	0.016	281.041	0.802
2011001	10000	15	66	0.004	0.007	0.008	0	0.001	0	0	0.001	0.005	0.003	0.011	280.529	0.797
2011001	10000	15	67	0.002	0.007	0.003	0	0.001	0	0	0.001	0.006	0.001	0.009	280.211	0.768
2011001	10000	15	68	0.002	0.007	0.003	0	0	0	0	0	0.006	0.001	0.009	280.546	0.77
2011001	10000	15	69	0.002	0.007	0.005	0	0.001	0	0	0	0.006	0.001	0.01	279.458	0.758
2011001	10000	15	70	0.002	0.006	0.008	0.001	0.001	0	0	0.001	0.006	0.002	0.011	280.126	0.771
2011001	10000	15	71	0.002	0.005	0.009	0.001	0.001	0.001	0	0.001	0.006	0.002	0.01	280.69	0.791
2011001	10000	15	72	0.002	0.008	0.008	0.001	0.002	0.001	0	0.002	0.007	0.001	0.008	283.437	0.796
2011001	10000	15	73	0.004	0.006	0.031	0.001	0.003	0.001	0.001	0.004	0.007	0.004	0.008	284.342	0.815
2011001	10000	15	74	0.003	0.006	0.032	0.002	0.003	0.002	0.001	0.006	0.008	0.005	0.006	283.578	0.823
2011001	10000	15	75	0.003	0.007	0.008	0.002	0.003	0.002	0.001	0.005	0.008	0.003	0.005	283.475	0.825
2011001	10000	15	76	0.004	0.01	0.003	0.002	0.002	0.001	0.001	0.003	0.008	0.002	0.006	283.367	0.845
2011001	10000	15	77	0.007	0.011	0.002	0.002	0.002	0.001	0.001	0.003	0.009	0.002	0.006	282.989	0.787
2011001	10000	15	78	0.008	0.012	0.001	0.002	0.002	0.001	0.001	0.003	0.009	0.002	0.006	282.995	0.761
2011001	10000	15	79	0.008	0.013	0.001	0.003	0.002	0.001	0.001	0.002	0.009	0.001	0.006	282.871	0.783
2011001	10000	15	80	0.006	0.012	0	0.003	0.002	0.001	0.001	0.001	0.009	0.001	0.005	282.677	0.836
2011001	10000	15	81	0.004	0.011	0	0.003	0.001	0.001	0.001	0.001	0.009	0.001	0.005	282.542	0.877
2011001	10000	15	82	0.003	0.01	0	0.004	0.002	0.001	0.001	0.001	0.009	0.001	0.005	282.448	0.893
2011001	10000	15	83	0.002	0.009	0	0.004	0.001	0.001	0.001	0.001	0.01	0.001	0.005	282.285	0.9
2011001	10000	15	84	0.002	0.01	0	0.004	0.001	0	0.001	0.001	0.01	0.001	0.005	282.073	0.903
2011001	10000	15	85	0.002	0.01	0	0.004	0.001	0	0.001	0.001	0.01	0.001	0.006	281.904	0.904
2011001	10000	15	86	0.002	0.01	0	0.004	0.001	0	0.001	0.001	0.01	0.001	0.006	281.734	0.902
2011001	10000	15	87	0.002	0.01	0	0.004	0.001	0	0.001	0	0.01	0	0.006	281.6	0.904
2011001	10000	15	88	0.002	0.009	0	0.005	0.001	0	0.001	0	0.01	0	0.006	281.515	0.904
2011001	10000	15	89	0.002	0.008	0	0.004	0.001	0	0.001	0	0.01	0.001	0.006	281.394	0.906
2011001	10000	15	90	0.003	0.009	0	0.004	0.001	0	0.001	0	0.01	0.001	0.006	281.328	0.907
2011001	10000	15	91	0.004	0.009	0	0.004	0.001	0	0.001	0	0.01	0.001	0.006	281.24	0.907
2011001	10000	15	92	0.003	0.009	0	0.004	0.001	0	0.001	0	0.01	0.001	0.006	281.123	0.904
2011001	10000	15	93	0.003	0.008	0	0.005	0.001	0	0.001	0	0.01	0	0.006	281.102	0.906
2011001	10000	15	94	0.003	0.008	0	0.005	0.001	0	0.001	0	0.01	0	0.005	281.107	0.907
2011001	10000	15	95	0.007	0.008	0	0.005	0.001	0	0.001	0	0.01	0	0.005	281.146	0.909
2011001	10000	15	96	0.007	0.008	0	0.004	0.001	0	0.001	0	0.01	0	0.005	281.127	0.911
2011001	10000	15	97	0.005	0.008	0	0.004	0.001	0	0.001	0	0.01	0	0.005	280.843	0.909
2011001	10000	15	98	0.003	0.007	0	0.004	0.001	0	0.001	0	0.01	0	0.005	280.55	0.902
2011001	10000	15	99	0.003	0.007	0	0.004	0.001	0	0	0	0.01	0	0.005	280.39	0.894
2011001	10000	15	100	0.003	0.007	0	0.004	0.001	0	0	0	0.01	0	0.005	280.15	0.885
2011001	10000	15	101	0.004	0.007	0	0.004	0.001	0	0	0	0.009	0	0.005	279.766	0.88
2011001	10000	15	102	0.004	0.006	0	0.004	0.001	0	0	0	0.009	0	0.004	278.252	0.902
2011001	10000	15	103	0.004	0.006	0	0.004	0.001	0	0.001	0	0.009	0	0.004	278.576	0.893
2011001	10000	15	104	0.003	0.005	0	0.004	0.001	0	0.001	0	0.009	0	0.004	278.962	0.878
2011001	10000	15	105	0.003	0.004	0	0.004	0.002	0	0.001	0	0.009	0	0.004	279.442	0.858
2011001	10000	15	106	0.004	0.004	0	0.005	0.002	0	0.001	0	0.008	0	0.004	279.709	0.834
2011001	10000	15	107	0.004	0.003	0	0.004	0.002	0	0.001	0	0.008	0	0.004	279.787	0.823
2011001	10000	15	108	0.004	0.003	0	0.004	0.002	0	0.001	0	0.008	0	0.004	279.625	0.815
2011001	10000	15	109	0.004	0.003	0	0.004	0.002	0	0	0	0.007	0	0.003	279.14	0.808
2011001	10000	15	110	0.004	0.002	0	0.004	0.002	0	0	0	0.007	0	0.003	278.863	0.809
2011001	10000	15	111	0.008	0.002	0	0.004	0.002	0	0	0	0.006	0	0.003	277.121	0.84
2011001	10000	15	112	0.016	0.001	0	0.002	0.001	0	0	0	0.006	0	0.003	274.954	0.877
2011001	10000	16	1	0	0.003	0	0.002	0.001	0	0	0	0.008	0	0.003	291.523	0.841
2011001	10000	16	2	0	0.003	0	0.002	0.001	0	0	0	0.007	0	0.004	291.271	0.841
2011001	10000	16	3	0	0.003	0	0.002	0.001	0	0	0	0.007	0	0.004	291.07	0.843
2011001	10000	16	4	0	0.003	0	0.002	0.001	0	0	0	0.007	0	0.004	290.848	0.846
2011001	10000	16	5	0	0.003	0	0.002	0.001	0	0	0	0.007	0	0.004	290.581	0.849
2011001	10000	16	6	0	0.003	0	0.002	0.001	0	0	0	0.007	0	0.004	290.449	0.848
2011001	10000	16	7	0	0.004	0	0.002	0.001	0	0	0	0.007	0	0.004	290.282	0.85
2011001	10000	16	8	0	0.003	0	0.002	0.001	0	0	0	0.007	0	0.004	290.086	0.857
2011001	10000	16	9	0	0.003	0	0.002	0.001	0	0	0	0.007	0	0.004	289.915	0.861
2011001	10000	16	10	0	0.003	0	0.002	0.001	0	0	0	0.007	0	0.004	289.733	0.869
2011001	10000	16	11	0	0.004	0	0.002	0.001	0	0	0	0.007	0	0.004	289.667	0.867
2011001	10000	16	12	0	0.004	0	0.002	0.001	0	0	0	0.007	0	0.004	289.508	0.872
2011001	10000	16	13	0	0.004	0	0.002	0.001	0	0	0	0.007	0	0.004	289.34	0.878
2011001	10000	16	14	0	0.004	0	0.002	0.001	0	0	0	0.006	0	0.004	289.098	0.893
2011001	10000	16	15	0	0.004	0	0.002	0.001	0	0	0	0.006	0	0.004	288.978	0.898
2011001	10000	16	16	0	0.003	0	0.002	0.001	0	0	0	0.006	0	0.004	288.8	0.902
2011001	10000	16	17	0	0.004	0	0.002	0.001	0	0	0	0.006	0	0.004	288.657	0.902
2011001	10000	16	18	0	0.004	0	0.002	0.001	0	0	0	0.006	0	0.004	288.474	0.905
2011001	10000	16	19	0	0.005	0	0.002	0.001	0	0	0	0.007	0	0.004	288.343	0.903
2011001	10000	16	20	0	0.005	0	0.002	0.001	0	0	0	0.007	0	0.004	288.234	0.903
2011001	10000	16	21	0	0.006	0	0.002	0.001	0	0	0	0.007	0	0.005	288.058	0.903
2011001	10000	16	22	0	0.007	0	0.002	0.001	0	0	0	0.007	0	0.005	287.908	0.904
2011001	10000	16	23	0	0.007	0	0.002	0.001	0	0	0	0.007	0	0.005	287.8	0.905
2011001	10000	16	24	0	0.006	0	0.002	0.001	0	0	0	0.007	0	0.005	287.685	0.904
2011001	10000	16	25	0	0.006	0	0.002	0.001	0	0	0	0.007	0	0.005	287.573	0.907
2011001	10000	16	26	0	0.005	0	0.002	0.001	0	0	0	0.008	0	0.005	287.462	0.906
2011001	10000	16	27	0	0.005	0	0.002	0.001	0	0	0	0.008	0	0.005	287.38	0.91
2011001	10000	16	28	0	0.006	0	0.003	0.001	0	0	0	0.008	0	0.005	287.28	0.909
2011001	10000	16	29	0	0.006	0	0.003	0.001	0	0	0	0.008	0	0.005	287.204	0.908
2011001	10000	16	30	0	0.007	0	0.003	0.001	0	0	0	0.009	0	0.005	287.157	0.908
2011001	10000	16	31	0	0.008	0	0.004	0.001	0	0.001	0.001	0.009	0.001	0.005	287.083	0.909
2011001	10000	16	32	0	0.009	0	0.004	0.001	0	0.001	0.001	0.01	0.001	0.006	287.123	0.911
2011001	10000	16	33	0.001	0.01	0	0.005	0.001	0	0.001	0.001	0.011	0.001	0.006	287.162	0.911
2011001	10000	16	34	0.001	0.012	0	0.005	0.001	0	0.001	0.001	0.011	0.001	0.006	287.122	0.915
2011001	10000	16	35	0.002	0.013	0	0.005	0.002	0	0.001	0.001	0.011	0.001	0.006	287.15	0.913
2011001	10000	16	36	0.002	0.014	0	0.005	0.002	0	0.001	0.001	0.011	0.001	0.006	287.064	0.916
2011001	10000	16	37	0.002	0.015	0	0.006	0.002	0.001	0.001	0.001	0.011	0.001	0.006	287.085	0.912
2011001	10000	16	38	0.002	0.015	0	0.006	0.002	0.001	0.001	0.001	0.011	0.001	0.006	287.031	0.911
2011001	10000	16	39	0.003	0.017	0	0.006	0.002	0.001	0.001	0.001	0.01	0.001	0.006	286.939	0.909
2011001	10000	16	40	0.003	0.019	0.001	0.006	0.002	0.001	0.001	0.001	0.01	0.002	0.006	286.896	0.905
2011001	10000	16	41	0.004	0.022	0.001	0.006	0.002	0.001	0.001	0.001	0.01	0.002	0.006	286.757	0.901
2011001	10000	16	42	0.005	0.026	0.001	0.006	0.003	0.001	0.001	0.002	0.01	0.002	0.007	286.583	0.89
2011001	10000	16	43	0.007	0.03	0.001	0.005	0.003	0.001	0.001	0.002	0.011	0.002	0.007	286.322	0.877
2011001	10000	16	44	0.009	0.03	0.001	0.005	0.003	0.001	0.001	0.002	0.011	0.002	0.008	286.053	0.87
2011001	10000	16	45	0.008	0.029	0.001	0.005	0.003	0.001	0.001	0.002	0.011	0.002	0.008	285.974	0.876
2011001	10000	16	46	0.007	0.03	0.001	0.005	0.002	0.001	0.001	0.002	0.011	0.002	0.008	285.944	0.9
2011001	10000	16	47	0.012	0.033	0.001	0.004	0.002	0.001	0.001	0.002	0.011	0.002	0.008	285.825	0.912
2011001	10000	16	48	0.018	0.035	0.001	0.004	0.002	0.001	0.001	0.002	0.011	0.002	0.009	285.452	0.914
2011001	10000	16	49	0.022	0.036	0.002	0.003	0.002	0.001	0.001	0.002	0.011	0.003	0.009	285.146	0.904
2011001	10000	16	50	0.016	0.032	0.002	0.003	0.002	0.001	0.001	0.002	0.01	0.003	0.01	285.013	0.891
2011001	10000	16	51	0.014	0.031	0.003	0.003	0.002	0.001	0.001	0.002	0.009	0.004	0.01	285.292	0.88
2011001	10000	16	52	0.009	0.03	0.006	0.002	0.003	0.001	0.001	0.003	0.009	0.006	0.011	285.595	0.862
2011001	10000	16	53	0.006	0.032	0.01	0.002	0.002	0.001	0.001	0.003	0.008	0.006	0.011	285.583	0.819
2011001	10000	16	54	0.006	0.033	0.014	0.001	0.002	0.001	0.001	0.003	0.008	0.005	0.01	285.184	0.725
2011001	10000	16	55	0.005	0.021	0.013	0.001	0.002	0.001	0.001	0.003	0.008	0.013	0.017	282.84	0.689
2011001	10000	16	56	0.013	0.02	0.042	0.001	0.003	0.002	0.001	0.006	0.009	0.043	0.046	283.06	0.819
2011001	10000	16	57	0.017	0.03	0.053	0.002	0.004	0.004	0.001	0.012	0.01	0.074	0.056	285.653	0.745
2011001	10000	16	58	0.023	0.014	0.052	0.002	0.005	0.005	0.001	0.017	0.011	0.084	0.067	284.135	0.74
2011001	10000	16	59	0.061	0.006	0.125	0.002	0.005	0.007	0.002	0.026	0.012	0.092	0.061	283.992	0.735
2011001	10000	16	60	0.091	0.006	0.129	0.002	0.006	0.009	0.002	0.033	0.015	0.11	0.069	282.597	0.8
2011001	10000	16	61	0.124	0.008	0.12	0.002	0.007	0.008	0.002	0.025	0.015	0.093	0.069	281.645	0.851
2011001	10000	16	62	0.009	0.009	0.045	0.001	0.003	0.003	0.001	0.009	0.008	0.053	0.046	280.923	0.843
2011001	10000	16	63	0.005	0.008	0.038	0.001	0.002	0.001	0	0.002	0.007	0.024	0.03	280.787	0.779
2011001	10000	16	64	0.013	0.008	0.025	0.001	0.001	0.001	0	0.002	0.006	0.015	0.021	280.866	0.783
2011001	10000	16	65	0.002	0.008	0.003	0	0	0	0	0.001	0.005	0.004	0.01	279.775	0.773
2011001	10000	16	66	0.002	0.009	0.002	0	0	0	0	0.001	0.005	0.002	0.008	278.045	0.746
2011001	10000	16	67	0.002	0.008	0.002	0	0	0	0	0.001	0.005	0.001	0.008	279.748	0.759
2011001	10000	16	68	0.002	0.007	0.005	0	0.001	0	0	0	0.005	0.001	0.009	279.398	0.704
2011001	10000	16	69	0.002	0.005	0.012	0	0.001	0	0	0	0.005	0.003	0.011	278.709	0.751
2011001	10000	16	70	0.001	0.006	0.004	0	0.001	0	0	0	0.005	0.001	0.009	278.624	0.743
2011001	10000	16	71	0.002	0.006	0.001	0	0.001	0	0	0	0.005	0	0.008	277.954	0.75
2011001	10000	16	72	0.001	0.005	0.001	0	0.001	0	0	0	0.005	0	0.007	278.808	0.79
2011001	10000	16	73	0.001	0.005	0.001	0	0.001	0	0	0	0.006	0	0.007	279.462	0.813
2011001	10000	16	74	0.002	0.006	0.001	0	0.001	0.001	0	0.001	0.006	0	0.007	279.798	0.805
2011001	10000	16	75	0.002	0.005	0.001	0.001	0.001	0.001	0	0.001	0.006	0.001	0.007	279.724	0.795
2011001	10000	16	76	0.002	0.005	0.002	0.001	0.001	0.001	0	0.001	0.007	0	0.007	280.067	0.824
2011001	10000	16	77	0.004	0.005	0.008	0.001	0.002	0.002	0.001	0.004	0.008	0.003	0.007	280.828	0.766
2011001	10000	16	78	0.005	0.006	0.006	0.002	0.003	0.003	0.002	0.009	0.009	0.005	0.004	282.924	0.72
2011001	10000	16	79	0.004	0.011	0.002	0.002	0.003	0.002	0.001	0.004	0.009	0.002	0.005	282.758	0.743
2011001	10000	16	80	0.005	0.012	0.001	0.003	0.002	0.001	0.001	0.003	0.009	0.002	0.005	282.685	0.826
2011001	10000	16	81	0.005	0.013	0.001	0.003	0.002	0.001	0.001	0.002	0.01	0.001	0.005	282.621	0.873
2011001	10000	16	82	0.006	0.013	0.001	0.003	0.002	0.001	0.001	0.002	0.01	0.002	0.005	282.523	0.891
2011001	10000	16	83	0.006	0.013	0	0.004	0.001	0.001	0.001	0.001	0.01	0.001	0.006	282.381	0.901
2011001	10000	16	84	0.005	0.013	0	0.004	0.001	0.001	0.001	0.001	0.01	0.001	0.006	282.146	0.904
2011001	10000	16	85	0.003	0.011	0	0.004	0.001	0	0.001	0.001	0.01	0.001	0.006	281.864	0.906
2011001	10000	16	86	0.003	0.011	0.001	0.004	0.001	0	0.001	0	0.01	0.001	0.006	281.613	0.906
2011001	10000	16	87	0.003	0.012	0.001	0.004	0.001	0	0.001	0	0.01	0.001	0.006	281.58	0.899
2011001	10000	16	88	0.003	0.012	0	0.004	0.001	0	0.001	0	0.01	0.001	0.006	281.493	0.899
2011001	10000	16	89	0.004	0.011	0	0.004	0.001	0	0.001	0	0.01	0.001	0.006	281.394	0.905
2011001	10000	16	90	0.005	0.011	0	0.004	0.001	0	0.001	0	0.01	0.001	0.006	281.306	0.901
2011001	10000	16	91	0.004	0.011	0	0.004	0.001	0	0.001	0	0.01	0.001	0.006	281.154	0.902
2011001	10000	16	92	0.003	0.01	0	0.004	0.001	0	0.001	0	0.01	0.001	0.006	281.103	0.903
2011001	10000	16	93	0.003	0.009	0	0.004	0.001	0	0.001	0	0.01	0	0.006	281.104	0.901
2011001	10000	16	94	0.004	0.009	0	0.004	0.001	0	0.001	0	0.01	0	0.005	281.168	0.905
2011001	10000	16	95	0.008	0.009	0	0.004	0.001	0	0.001	0	0.01	0	0.005	281.401	0.911
2011001	10000	16	96	0.006	0.009	0	0.004	0.001	0	0	0	0.01	0	0.005	281.352	0.91
2011001	10000	16	97	0.004	0.009	0	0.004	0.001	0	0	0	0.01	0	0.005	281.163	0.905
2011001	10000	16	98	0.004	0.009	0	0.004	0.001	0	0	0	0.01	0	0.005	280.952	0.897
2011001	10000	16	99	0.004	0.008	0	0.003	0.001	0	0	0	0.009	0	0.005	280.58	0.878
2011001	10000	16	100	0.004	0.007	0	0.003	0.001	0	0	0	0.008	0	0.005	280.222	0.862
2011001	10000	16	101	0.004	0.004	0	0.003	0	0.001	0	0	0.008	0	0.005	277.36	0.927
2011001	10000	16	102	0.003	0.004	0	0.002	0	0	0	0	0.008	0	0.005	276.827	0.929
2011001	10000	16	103	0.007	0.006	0	0.003	0.001	0	0	0	0.008	0	0.004	279.039	0.856
2011001	10000	16	104	0.006	0.006	0	0.003	0.001	0	0	0	0.008	0	0.004	279.408	0.847
2011001	10000	16	105	0.005	0.005	0	0.003	0.001	0	0	0	0.007	0	0.004	279.709	0.83
2011001	10000	16	106	0.003	0.004	0	0.004	0.001	0	0	0	0.007	0	0.004	279.816	0.808
2011001	10000	16	107	0.003	0.003	0	0.004	0.001	0	0	0	0.007	0	0.003	279.775	0.803
2011001	10000	16	108	0.002	0.002	0	0.003	0.001	0	0	0	0.006	0	0.003	279.098	0.806
2011001	10000	16	109	0.003	0.002	0	0.003	0.001	0	0	0	0.006	0	0.003	278.782	0.794
2011001	10000	16	110	0.005	0.002	0	0.003	0.001	0	0	0	0.006	0	0.003	276.68	0.834
2011001	10000	16	111	0.012	0.001	0	0.002	0.001	0	0	0	0.005	0	0.003	273.768	0.877
2011001	10000	16	112	0.038	0.001	0	0.001	0	0	0	0	0.005	0	0.003	273.682	0.863
2011001	10000	17	1	0	0.003	0	0.002	0.001	0	0	0	0.008	0	0.004	291.505	0.843
2011001	10000	17	2	0	0.003	0	0.002	0.001	0	0	0	0.008	0	0.004	291.212	0.843
2011001	10000	17	3	0	0.003	0	0.002	0.001	0	0	0	0.008	0	0.004	290.989	0.845
2011001	10000	17	4	0	0.003	0	0.002	0.001	0	0	0	0.008	0	0.004	290.753	0.848
2011001	10000	17	5	0	0.003	0	0.002	0.001	0	0	0	0.007	0	0.004	290.571	0.852
2011001	10000	17	6	0	0.003	0	0.002	0.001	0	0	0	0.007	0	0.003	290.315	0.856
2011001	10000	17	7	0	0.003	0	0.002	0.001	0	0	0	0.007	0	0.003	290.165	0.86
2011001	10000	17	8	0	0.003	0	0.002	0.001	0	0	0	0.007	0	0.003	289.972	0.865
2011001	10000	17	9	0	0.003	0	0.002	0.001	0	0	0	0.007	0	0.004	289.826	0.867
2011001	10000	17	10	0	0.004	0	0.002	0.001	0	0	0	0.007	0	0.004	289.663	0.872
2011001	10000	17	11	0	0.004	0	0.002	0.001	0	0	0	0.007	0	0.004	289.524	0.872
2011001	10000	17	12	0	0.004	0	0.002	0.001	0	0	0	0.007	0	0.004	289.4	0.878
2011001	10000	17	13	0	0.004	0	0.002	0.001	0	0	0	0.007	0	0.004	289.188	0.887
2011001	10000	17	14	0	0.004	0	0.002	0.001	0	0	0	0.007	0	0.004	289.032	0.899
2011001	10000	17	15	0	0.004	0	0.002	0.001	0	0	0	0.006	0	0.004	288.863	0.902
2011001	10000	17	16	0	0.004	0	0.002	0.001	0	0	0	0.007	0	0.004	288.719	0.902
2011001	10000	17	17	0	0.004	0	0.002	0.001	0	0	0	0.007	0	0.004	288.613	0.902
2011001	10000	17	18	0	0.005	0	0.002	0.001	0	0	0	0.007	0	0.004	288.433	0.902
2011001	10000	17	19	0	0.005	0	0.002	0.001	0	0	0	0.007	0	0.004	288.288	0.905
2011001	10000	17	20	0	0.005	0	0.002	0.001	0	0	0	0.007	0	0.004	288.121	0.907
2011001	10000	17	21	0	0.005	0	0.002	0.001	0	0	0	0.007	0	0.004	287.977	0.908
2011001	10000	17	22	0	0.006	0	0.002	0.001	0	0	0	0.007	0	0.004	287.835	0.909
2011001	10000	17	23	0	0.006	0	0.002	0.001	0	0	0	0.007	0	0.004	287.697	0.909
2011001	10000	17	24	0	0.005	0	0.002	0.001	0	0	0	0.007	0	0.004	287.628	0.906
2011001	10000	17	25	0	0.005	0	0.002	0.001	0	0	0	0.008	0	0.004	287.501	0.907
2011001	10000	17	26	0	0.005	0	0.002	0.001	0	0	0	0.008	0	0.005	287.424	0.907
2011001	10000	17	27	0	0.006	0	0.002	0.001	0	0	0	0.008	0	0.005	287.278	0.909
2011001	10000	17	28	0	0.006	0	0.003	0.001	0	0	0	0.008	0	0.005	287.184	0.911
2011001	10000	17	29	0	0.006	0	0.003	0.001	0	0	0	0.008	0	0.005	287.146	0.909
2011001	10000	17	30	0	0.007	0	0.003	0.001	0	0	0.001	0.009	0	0.005	287.081	0.912
2011001	10000	17	31	0.001	0.008	0	0.004	0.001	0	0.001	0.001	0.01	0.001	0.006	287.086	0.911
2011001	10000	17	32	0.001	0.01	0	0.004	0.001	0	0.001	0.001	0.01	0.001	0.006	287.098	0.912
2011001	10000	17	33	0.001	0.012	0	0.004	0.001	0	0.001	0.001	0.011	0.001	0.006	287.102	0.913
2011001	10000	17	34	0.001	0.013	0	0.004	0.001	0	0.001	0.001	0.011	0.001	0.006	287.117	0.912
2011001	10000	17	35	0.002	0.014	0	0.005	0.002	0	0.001	0.001	0.011	0.001	0.006	287.058	0.914
2011001	10000	17	36	0.002	0.014	0	0.005	0.002	0	0.001	0.001	0.011	0.001	0.006	287.045	0.915
2011001	10000	17	37	0.003	0.016	0	0.005	0.002	0.001	0.001	0.001	0.011	0.001	0.006	287.067	0.911
2011001	10000	17	38	0.003	0.017	0	0.005	0.002	0.001	0.001	0.001	0.011	0.001	0.006	286.973	0.913
2011001	10000	17	39	0.004	0.02	0	0.006	0.002	0.001	0.001	0.001	0.01	0.002	0.006	286.965	0.904
2011001	10000	17	40	0.004	0.022	0.001	0.006	0.002	0.001	0.001	0.001	0.01	0.002	0.007	286.853	0.903
2011001	10000	17	41	0.005	0.028	0.001	0.005	0.002	0.001	0.001	0.001	0.01	0.002	0.007	286.69	0.892
2011001	10000	17	42	0.007	0.034	0.001	0.005	0.003	0.001	0.001	0.002	0.011	0.002	0.008	286.337	0.874
2011001	10000	17	43	0.009	0.038	0.001	0.005	0.003	0.001	0.001	0.002	0.011	0.003	0.009	285.845	0.851
2011001	10000	17	44	0.012	0.037	0.002	0.005	0.003	0.001	0.001	0.002	0.011	0.003	0.009	285.543	0.834
2011001	10000	17	45	0.012	0.034	0.002	0.005	0.003	0.001	0.001	0.002	0.011	0.002	0.008	285.579	0.85
2011001	10000	17	46	0.01	0.033	0.001	0.004	0.002	0.001	0.001	0.002	0.011	0.002	0.008	285.856	0.892
2011001	10000	17	47	0.013	0.038	0.001	0.004	0.002	0.001	0.001	0.002	0.011	0.002	0.009	286.089	0.918
2011001	10000	17	48	0.019	0.036	0.002	0.003	0.002	0.001	0.001	0.002	0.01	0.003	0.009	285.735	0.914
2011001	10000	17	49	0.016	0.031	0.004	0.003	0.002	0.001	0.001	0.002	0.009	0.004	0.009	285.403	0.877
2011001	10000	17	50	0.007	0.032	0.008	0.002	0.003	0.001	0.001	0.002	0.007	0.004	0.008	286.074	0.777
2011001	10000	17	51	0.007	0.03	0.01	0.002	0.003	0.001	0.001	0.003	0.007	0.006	0.009	285.785	0.826
2011001	10000	17	52	0.005	0.028	0.02	0.001	0.003	0.001	0.001	0.004	0.007	0.011	0.013	285.716	0.808
2011001	10000	17	53	0.003	0.021	0.018	0.001	0.002	0.001	0.001	0.003	0.007	0.012	0.015	283.645	0.744
2011001	10000	17	54	0.004	0.022	0.017	0.001	0.002	0.001	0	0.003	0.007	0.011	0.014	283.187	0.638
2011001	10000	17	55	0.005	0.023	0.025	0.001	0.002	0.001	0.001	0.004	0.007	0.02	0.022	282.172	0.629
2011001	10000	17	56	0.007	0.02	0.036	0.001	0.002	0.002	0.001	0.006	0.008	0.034	0.033	282.66	0.675
2011001	10000	17	57	0.01	0.014	0.081	0.002	0.004	0.005	0.002	0.015	0.009	0.074	0.055	283.878	0.722
2011001	10000	17	58	0.011	0.012	0.046	0.001	0.004	0.005	0.001	0.018	0.009	0.079	0.051	283.007	0.72
2011001	10000	17	59	0.018	0.014	0.057	0.002	0.004	0.005	0.001	0.02	0.01	0.08	0.053	282.692	0.665
2011001	10000	17	60	0.044	0.01	0.097	0.002	0.005	0.009	0.002	0.03	0.013	0.114	0.072	281.94	0.779
2011001	10000	17	61	0.052	0.013	0.107	0.002	0.006	0.009	0.002	0.025	0.012	0.092	0.058	280.735	0.855
2011001	10000	17	62	0.008	0.011	0.031	0.002	0.004	0.004	0.001	0.012	0.009	0.067	0.053	280.438	0.844
2011001	10000	17	63	0.003	0.012	0.011	0.001	0.002	0.002	0.001	0.004	0.007	0.031	0.028	280.616	0.825
2011001	10000	17	64	0.004	0.01	0.015	0.001	0.002	0.002	0.001	0.003	0.006	0.018	0.02	280.979	0.797
2011001	10000	17	65	0.002	0.01	0.01	0.001	0.001	0.001	0	0.002	0.006	0.007	0.013	281.413	0.768
2011001	10000	17	66	0.002	0.01	0.007	0.001	0.001	0.001	0	0.001	0.006	0.004	0.011	280.423	0.699
2011001	10000	17	67	0.002	0.008	0.009	0.001	0.001	0.001	0	0.001	0.006	0.004	0.01	281.946	0.724
2011001	10000	17	68	0.002	0.007	0.016	0.001	0.001	0.001	0	0.001	0.006	0.004	0.011	282.003	0.72
2011001	10000	17	69	0.002	0.005	0.029	0	0.001	0	0	0.001	0.005	0.005	0.013	279.407	0.749
2011001	10000	17	70	0.002	0.006	0.007	0	0.001	0	0	0	0.005	0.002	0.01	277.519	0.73
2011001	10000	17	71	0.002	0.006	0.002	0	0	0	0	0	0.005	0.001	0.008	276.05	0.729
2011001	10000	17	72	0.002	0.005	0.002	0	0	0	0	0	0.005	0.001	0.008	276.035	0.802
2011001	10000	17	73	0.001	0.005	0.003	0	0.001	0	0	0.001	0.005	0.001	0.008	276.239	0.803
2011001	10000	17	74	0.003	0.005	0.004	0.001	0.001	0.002	0	0.002	0.006	0.002	0.007	277.498	0.787
2011001	10000	17	75	0.003	0.005	0.004	0.001	0.002	0.002	0	0.002	0.007	0.003	0.007	277.234	0.812
2011001	10000	17	76	0.003	0.005	0.004	0.001	0.001	0.001	0	0.001	0.007	0.001	0.007	278.316	0.774
2011001	10000	17	77	0.003	0.005	0.005	0.001	0.001	0.001	0	0.002	0.007	0.001	0.007	280.321	0.776
2011001	10000	17	78	0.003	0.005	0.003	0.001	0.001	0.002	0.001	0.003	0.008	0.001	0.006	280.779	0.749
2011001	10000	17	79	0.002	0.005	0.002	0.002	0.002	0.003	0.001	0.005	0.008	0.004	0.006	280.248	0.793
2011001	10000	17	80	0.003	0.009	0.002	0.002	0.002	0.002	0.001	0.005	0.009	0.003	0.005	282.002	0.835
2011001	10000	17	81	0.003	0.012	0.002	0.003	0.003	0.002	0.001	0.003	0.009	0.003	0.005	282.523	0.865
2011001	10000	17	82	0.004	0.013	0.001	0.003	0.003	0.002	0.001	0.004	0.01	0.004	0.005	282.739	0.881
2011001	10000	17	83	0.005	0.016	0.001	0.003	0.002	0.001	0.001	0.002	0.01	0.003	0.006	282.49	0.898
2011001	10000	17	84	0.006	0.016	0.001	0.003	0.001	0.001	0.001	0.001	0.01	0.001	0.006	282.194	0.91
2011001	10000	17	85	0.007	0.014	0.001	0.004	0.001	0.001	0.001	0.001	0.011	0.001	0.006	281.87	0.906
2011001	10000	17	86	0.007	0.014	0.001	0.004	0.001	0	0.001	0.001	0.01	0.001	0.006	281.578	0.9
2011001	10000	17	87	0.007	0.015	0.001	0.004	0.001	0	0.001	0.001	0.01	0.001	0.006	281.419	0.897
2011001	10000	17	88	0.005	0.015	0.001	0.004	0.001	0	0.001	0	0.01	0.001	0.006	281.5	0.897
2011001	10000	17	89	0.006	0.013	0.001	0.004	0.001	0	0.001	0	0.01	0.001	0.006	281.439	0.901
2011001	10000	17	90	0.005	0.014	0	0.004	0.001	0	0.001	0	0.01	0.001	0.006	281.318	0.899
2011001	10000	17	91	0.004	0.013	0	0.004	0.001	0	0.001	0	0.009	0.001	0.006	281.156	0.901
2011001	10000	17	92	0.004	0.012	0	0.004	0.001	0	0.001	0	0.009	0.001	0.006	281.04	0.899
2011001	10000	17	93	0.004	0.011	0	0.004	0.001	0	0	0	0.01	0	0.006	281.015	0.901
2011001	10000	17	94	0.008	0.01	0	0.004	0.001	0	0	0	0.01	0	0.005	281.234	0.906
2011001	10000	17	95	0.009	0.011	0	0.003	0.001	0	0	0	0.01	0	0.005	281.396	0.908
2011001	10000	17	96	0.006	0.012	0	0.003	0.001	0	0	0	0.01	0	0.005	281.501	0.901
2011001	10000	17	97	0.004	0.01	0	0.003	0.001	0	0	0	0.009	0	0.005	281.463	0.88
2011001	10000	17	98	0.004	0.009	0	0.003	0.001	0	0	0	0.009	0	0.005	279.994	0.892
2011001	10000	17	99	0.003	0.006	0	0.002	0	0	0	0	0.008	0	0.005	278.437	0.917
2011001	10000	17	100	0.003	0.005	0	0.002	0	0	0	0	0.007	0	0.005	276.714	0.912
2011001	10000	17	101	0.011	0.005	0.001	0.004	0.001	0.002	0	0	0.009	0.001	0.007	276.301	0.896
2011001	10000	17	102	0.013	0.008	0	0.003	0.001	0.001	0	0	0.008	0	0.006	278.013	0.862
2011001	10000	17	103	0.007	0.007	0	0.002	0.001	0	0	0	0.007	0	0.005	279.648	0.824
2011001	10000	17	104	0.004	0.005	0	0.003	0.001	0	0	0	0.007	0	0.004	278.116	0.85
2011001	10000	17	105	0.003	0.004	0	0.003	0.001	0	0	0	0.007	0	0.004	278.336	0.835
2011001	10000	17	106	0.002	0.003	0	0.003	0.001	0	0	0	0.006	0	0.003	279.11	0.796
2011001	10000	17	107	0.002	0.002	0	0.003	0.001	0	0	0	0.006	0	0.003	278.41	0.801
2011001	10000	17	108	0.002	0.001	0	0.002	0.001	0	0	0	0.006	0	0.003	275.616	0.851
2011001	10000	17	109	0.003	0.001	0	0.001	0	0	0	0	0.005	0	0.003	274.117	0.869
2011001	10000	17	110	0.004	0.001	0	0.001	0	0	0	0	0.005	0	0.003	272.855	0.868
2011001	10000	17	111	0.02	0.001	0	0.001	0	0	0	0	0.005	0	0.003	272.9	0.859
2011001	10000	17	112	0.11	0.001	0	0.001	0	0	0	0	0.005	0	0.004	271.747	0.86
2011001	10000	18	1	0	0.003	0	0.002	0.001	0	0	0	0.008	0	0.004	291.495	0.844
2011001	10000	18	2	0	0.003	0	0.002	0.001	0	0	0	0.008	0	0.004	291.253	0.845
2011001	10000	18	3	0	0.003	0	0.002	0.001	0	0	0	0.008	0	0.004	290.936	0.847
2011001	10000	18	4	0	0.003	0	0.002	0.001	0	0	0	0.008	0	0.004	290.728	0.85
2011001	10000	18	5	0	0.003	0	0.002	0.001	0	0	0	0.008	0	0.004	290.47	0.852
2011001	10000	18	6	0	0.003	0	0.002	0.001	0	0	0	0.008	0	0.004	290.271	0.857
2011001	10000	18	7	0	0.003	0	0.002	0.001	0	0	0	0.007	0	0.004	290.104	0.863
2011001	10000	18	8	0	0.003	0	0.002	0.001	0	0	0	0.008	0	0.004	289.924	0.87
2011001	10000	18	9	0	0.004	0	0.002	0.001	0	0	0	0.008	0	0.004	289.746	0.871
2011001	10000	18	10	0	0.004	0	0.002	0.001	0	0	0	0.008	0	0.004	289.588	0.873
2011001	10000	18	11	0	0.004	0	0.002	0.001	0	0	0	0.008	0	0.004	289.477	0.876
2011001	10000	18	12	0	0.004	0	0.002	0.001	0	0	0	0.008	0	0.004	289.288	0.886
2011001	10000	18	13	0	0.004	0	0.002	0.001	0	0	0	0.007	0	0.004	289.075	0.898
2011001	10000	18	14	0	0.004	0	0.002	0.001	0	0	0	0.007	0	0.004	288.9	0.903
2011001	10000	18	15	0	0.003	0	0.002	0.001	0	0	0	0.007	0	0.004	288.773	0.906
2011001	10000	18	16	0	0.004	0	0.002	0.001	0	0	0	0.007	0	0.004	288.65	0.906
2011001	10000	18	17	0	0.004	0	0.002	0.001	0	0	0	0.007	0	0.004	288.524	0.906
2011001	10000	18	18	0	0.004	0	0.002	0.001	0	0	0	0.007	0	0.004	288.37	0.908
2011001	10000	18	19	0	0.004	0	0.002	0.001	0	0	0	0.007	0	0.004	288.196	0.91
2011001	10000	18	20	0	0.004	0	0.002	0.001	0	0	0	0.007	0	0.004	288.076	0.911
2011001	10000	18	21	0	0.005	0	0.002	0.001	0	0	0	0.007	0	0.004	287.905	0.91
2011001	10000	18	22	0	0.005	0	0.002	0.001	0	0	0	0.007	0	0.004	287.764	0.91
2011001	10000	18	23	0	0.005	0	0.002	0.001	0	0	0	0.007	0	0.004	287.644	0.91
2011001	10000	18	24	0	0.005	0	0.002	0.001	0	0	0	0.008	0	0.004	287.542	0.91
2011001	10000	18	25	0	0.005	0	0.002	0.001	0	0	0	0.008	0	0.004	287.462	0.909
2011001	10000	18	26	0	0.006	0	0.002	0.001	0	0	0	0.008	0	0.004	287.329	0.908
2011001	10000	18	27	0	0.006	0	0.002	0.001	0	0	0	0.008	0	0.005	287.217	0.909
2011001	10000	18	28	0	0.006	0	0.003	0.001	0	0	0	0.008	0	0.005	287.136	0.91
2011001	10000	18	29	0	0.007	0	0.003	0.001	0	0	0.001	0.009	0	0.005	287.042	0.912
2011001	10000	18	30	0.001	0.008	0	0.003	0.001	0	0	0.001	0.009	0.001	0.005	287.041	0.913
2011001	10000	18	31	0.001	0.01	0	0.004	0.001	0	0.001	0.001	0.01	0.001	0.006	287.074	0.913
2011001	10000	18	32	0.001	0.01	0	0.004	0.001	0	0.001	0.001	0.01	0.001	0.006	287.087	0.914
2011001	10000	18	33	0.001	0.012	0	0.004	0.001	0	0.001	0.001	0.011	0.001	0.006	287.122	0.913
2011001	10000	18	34	0.002	0.013	0	0.005	0.001	0	0.001	0.001	0.011	0.001	0.006	287.082	0.915
2011001	10000	18	35	0.002	0.014	0	0.005	0.002	0	0.001	0.001	0.011	0.001	0.006	287.049	0.915
2011001	10000	18	36	0.002	0.016	0	0.005	0.002	0.001	0.001	0.001	0.011	0.001	0.006	287.025	0.913
2011001	10000	18	37	0.003	0.018	0	0.005	0.002	0.001	0.001	0.001	0.011	0.001	0.006	287.029	0.91
2011001	10000	18	38	0.004	0.021	0	0.005	0.002	0.001	0.001	0.001	0.011	0.002	0.006	287.025	0.905
2011001	10000	18	39	0.005	0.021	0	0.005	0.002	0.001	0.001	0.001	0.01	0.002	0.006	286.929	0.903
2011001	10000	18	40	0.005	0.025	0.001	0.005	0.002	0.001	0.001	0.001	0.01	0.002	0.007	286.879	0.894
2011001	10000	18	41	0.007	0.033	0.001	0.005	0.003	0.001	0.001	0.002	0.011	0.002	0.008	286.6	0.879
2011001	10000	18	42	0.009	0.04	0.002	0.005	0.003	0.001	0.001	0.002	0.011	0.003	0.009	286.082	0.853
2011001	10000	18	43	0.011	0.044	0.002	0.004	0.003	0.001	0.001	0.002	0.011	0.003	0.01	285.42	0.821
2011001	10000	18	44	0.013	0.043	0.003	0.004	0.003	0.001	0.001	0.002	0.011	0.003	0.009	284.93	0.804
2011001	10000	18	45	0.014	0.039	0.002	0.004	0.003	0.001	0.001	0.002	0.011	0.002	0.009	285.255	0.823
2011001	10000	18	46	0.01	0.035	0.002	0.004	0.002	0.001	0.001	0.002	0.01	0.002	0.008	285.942	0.877
2011001	10000	18	47	0.012	0.036	0.002	0.003	0.002	0.001	0.001	0.002	0.01	0.002	0.009	286.552	0.906
2011001	10000	18	48	0.015	0.03	0.005	0.003	0.003	0.001	0.001	0.002	0.008	0.003	0.008	286.829	0.87
2011001	10000	18	49	0.01	0.026	0.016	0.002	0.003	0.001	0.001	0.003	0.007	0.004	0.007	287.477	0.721
2011001	10000	18	50	0.011	0.015	0.021	0.001	0.002	0.001	0.001	0.004	0.007	0.009	0.011	285.664	0.712
2011001	10000	18	51	0.011	0.018	0.029	0.001	0.003	0.002	0.001	0.004	0.007	0.014	0.016	284.605	0.712
2011001	10000	18	52	0.006	0.019	0.03	0.001	0.002	0.002	0.001	0.004	0.007	0.017	0.019	283.599	0.735
2011001	10000	18	53	0.005	0.021	0.036	0.001	0.002	0.002	0.001	0.004	0.007	0.027	0.028	282.924	0.678
2011001	10000	18	54	0.007	0.024	0.023	0.001	0.002	0.001	0.001	0.004	0.007	0.023	0.024	282.207	0.674
2011001	10000	18	55	0.004	0.029	0.018	0.001	0.001	0.001	0	0.003	0.007	0.023	0.025	281.193	0.682
2011001	10000	18	56	0.005	0.035	0.021	0.001	0.001	0.001	0.001	0.004	0.007	0.033	0.032	281.026	0.698
2011001	10000	18	57	0.006	0.025	0.051	0.001	0.003	0.003	0.001	0.008	0.008	0.072	0.066	281.773	0.724
2011001	10000	18	58	0.01	0.018	0.094	0.001	0.003	0.003	0.002	0.009	0.008	0.086	0.078	281.689	0.767
2011001	10000	18	59	0.024	0.012	0.145	0.002	0.004	0.005	0.002	0.012	0.009	0.098	0.089	281.537	0.76
2011001	10000	18	60	0.052	0.008	0.255	0.003	0.006	0.007	0.003	0.017	0.012	0.105	0.089	280.716	0.861
2011001	10000	18	61	0.017	0.011	0.152	0.002	0.006	0.007	0.002	0.015	0.01	0.088	0.07	280.311	0.87
2011001	10000	18	62	0.03	0.005	0.171	0.003	0.007	0.009	0.003	0.024	0.011	0.1	0.066	280.349	0.868
2011001	10000	18	63	0.009	0.01	0.054	0.002	0.005	0.005	0.001	0.01	0.008	0.073	0.059	280.731	0.867
2011001	10000	18	64	0.005	0.009	0.055	0.002	0.004	0.005	0.001	0.009	0.007	0.047	0.039	281.173	0.833
2011001	10000	18	65	0.008	0.01	0.056	0.001	0.003	0.003	0.001	0.005	0.007	0.026	0.025	282.389	0.786
2011001	10000	18	66	0.007	0.008	0.071	0.001	0.003	0.003	0.001	0.006	0.006	0.017	0.015	282.567	0.687
2011001	10000	18	67	0.005	0.009	0.06	0.001	0.003	0.003	0.001	0.005	0.006	0.012	0.012	283.022	0.663
2011001	10000	18	68	0.006	0.007	0.099	0.002	0.003	0.003	0.001	0.005	0.006	0.014	0.014	282.921	0.669
2011001	10000	18	69	0.003	0.007	0.028	0.001	0.001	0.001	0	0.001	0.006	0.007	0.014	280.822	0.71
2011001	10000	18	70	0.002	0.007	0.003	0	0.001	0	0	0.001	0.005	0.002	0.009	277.001	0.746
2011001	10000	18	71	0.003	0.006	0.009	0	0.001	0	0	0.001	0.005	0.003	0.01	275.325	0.767
2011001	10000	18	72	0.004	0.004	0.022	0	0.001	0.001	0	0.001	0.005	0.004	0.011	275.39	0.807
2011001	10000	18	73	0.002	0.004	0.005	0.001	0.001	0.001	0	0.001	0.006	0.002	0.008	275.819	0.79
2011001	10000	18	74	0.005	0.004	0.014	0.002	0.004	0.005	0.001	0.004	0.007	0.007	0.009	276.66	0.782
2011001	10000	18	75	0.004	0.004	0.007	0.001	0.003	0.004	0.001	0.003	0.007	0.005	0.009	276.865	0.809
2011001	10000	18	76	0.002	0.005	0.004	0.001	0.001	0.002	0	0.002	0.007	0.002	0.008	278.086	0.803
2011001	10000	18	77	0.005	0.005	0.012	0.002	0.003	0.004	0.001	0.004	0.008	0.007	0.01	279.369	0.801
2011001	10000	18	78	0.003	0.006	0.005	0.001	0.002	0.002	0.001	0.003	0.008	0.003	0.008	279.5	0.786
2011001	10000	18	79	0.002	0.006	0.002	0.001	0.001	0.002	0.001	0.003	0.008	0.004	0.008	278.994	0.852
2011001	10000	18	80	0.002	0.007	0.002	0.002	0.001	0.002	0.001	0.003	0.008	0.005	0.008	278.707	0.876
2011001	10000	18	81	0.003	0.007	0.002	0.003	0.002	0.002	0.001	0.005	0.01	0.009	0.009	280.024	0.891
2011001	10000	18	82	0.004	0.01	0.003	0.003	0.003	0.003	0.002	0.008	0.009	0.01	0.006	281.806	0.872
2011001	10000	18	83	0.004	0.015	0.002	0.003	0.002	0.002	0.001	0.004	0.009	0.006	0.007	282.091	0.898
2011001	10000	18	84	0.004	0.018	0.002	0.003	0.002	0.001	0.001	0.002	0.01	0.004	0.008	282.392	0.902
2011001	10000	18	85	0.005	0.017	0.002	0.003	0.001	0.001	0.001	0.002	0.01	0.003	0.007	281.816	0.905
2011001	10000	18	86	0.007	0.017	0.001	0.004	0.001	0.001	0.001	0.001	0.011	0.002	0.007	281.362	0.896
2011001	10000	18	87	0.011	0.019	0.001	0.004	0.001	0.001	0.001	0.001	0.011	0.001	0.007	281.42	0.892
2011001	10000	18	88	0.009	0.018	0.001	0.004	0.001	0.001	0.001	0.001	0.011	0.002	0.007	281.615	0.894
2011001	10000	18	89	0.009	0.018	0.001	0.004	0.001	0.001	0.001	0.001	0.01	0.002	0.007	281.713	0.898
2011001	10000	18	90	0.008	0.019	0.001	0.004	0.001	0	0.001	0	0.01	0.001	0.007	281.428	0.898
2011001	10000	18	91	0.007	0.018	0	0.004	0.001	0	0	0	0.01	0.001	0.007	281.194	0.897
2011001	10000	18	92	0.006	0.016	0	0.003	0.001	0	0	0	0.009	0.001	0.006	281.102	0.894
2011001	10000	18	93	0.008	0.016	0	0.003	0.001	0	0	0	0.01	0.001	0.007	281.031	0.896
2011001	10000	18	94	0.014	0.015	0	0.003	0.001	0	0	0	0.011	0.001	0.006	280.94	0.899
[truncated: 14,578 more rows]
