# Supplementary material for: Understanding nitrate formation in a world with less sulfate
Source: Copernicus journal article supplement (doi:10.5194/acp-18-12765-2018), 2018-09-05
Supplement: Supplementary file 2 [file acp-18-12765-2018-supplement.zip › DATA/average_entire2011.csv]

Date	Hour	COL_NUM	ROW_NUM	SO2	HNO3	NH3	NA	CL	K	MG	CA	SO4	NO3	NH4	T	RH
EST	1-24hr	umol/m3	umol/m3	umol/m3	umol/m3	umol/m3	umol/m3	umol/m3	umol/m3	umol/m3	umol/m3	umol/m3	K
2011001	10000	1	1	0	0.003	0	0.002	0.001	0	0	0	0.005	0	0.003	292.939	0.823
2011001	10000	1	2	0	0.003	0	0.002	0.001	0	0	0	0.005	0	0.003	292.775	0.822
2011001	10000	1	3	0	0.004	0	0.002	0.001	0	0	0	0.005	0	0.003	292.529	0.821
2011001	10000	1	4	0	0.004	0	0.002	0.001	0	0	0	0.005	0	0.003	292.332	0.822
2011001	10000	1	5	0	0.003	0	0.002	0.001	0	0	0	0.005	0	0.003	292.169	0.821
2011001	10000	1	6	0	0.003	0	0.002	0.001	0	0	0	0.005	0	0.003	292	0.82
2011001	10000	1	7	0	0.003	0	0.002	0.001	0	0	0	0.005	0	0.004	291.816	0.82
2011001	10000	1	8	0	0.003	0	0.002	0.001	0	0	0	0.005	0	0.004	291.657	0.817
2011001	10000	1	9	0	0.003	0	0.002	0.001	0	0	0	0.005	0	0.004	291.541	0.817
2011001	10000	1	10	0	0.004	0	0.002	0.001	0	0	0	0.005	0	0.004	291.431	0.814
2011001	10000	1	11	0	0.004	0	0.002	0.001	0	0	0	0.005	0	0.004	291.318	0.816
2011001	10000	1	12	0	0.004	0.001	0.002	0.001	0	0	0	0.005	0	0.004	291.167	0.815
2011001	10000	1	13	0	0.004	0.001	0.002	0.001	0	0	0	0.005	0	0.004	291.055	0.816
2011001	10000	1	14	0	0.005	0.001	0.002	0.001	0	0	0	0.005	0	0.004	290.911	0.82
2011001	10000	1	15	0	0.004	0.001	0.002	0.001	0	0	0	0.006	0	0.004	290.749	0.827
2011001	10000	1	16	0	0.004	0	0.002	0.001	0	0	0	0.006	0	0.004	290.583	0.831
2011001	10000	1	17	0	0.004	0	0.002	0.001	0	0	0	0.006	0	0.004	290.4	0.836
2011001	10000	1	18	0	0.005	0	0.002	0.001	0	0	0	0.006	0	0.004	290.248	0.839
2011001	10000	1	19	0	0.005	0	0.002	0.001	0	0	0	0.006	0	0.005	290.053	0.841
2011001	10000	1	20	0	0.005	0	0.003	0.001	0	0	0	0.006	0	0.005	289.909	0.844
2011001	10000	1	21	0	0.005	0.001	0.003	0.001	0	0	0	0.006	0	0.005	289.725	0.846
2011001	10000	1	22	0.001	0.006	0.001	0.003	0.001	0	0	0	0.007	0	0.005	289.575	0.848
2011001	10000	1	23	0.001	0.006	0.001	0.003	0.001	0	0	0	0.007	0	0.005	289.477	0.845
2011001	10000	1	24	0.001	0.006	0.001	0.003	0.001	0	0	0	0.007	0	0.005	289.301	0.848
2011001	10000	1	25	0.001	0.006	0.001	0.003	0.001	0	0	0	0.007	0	0.005	289.205	0.85
2011001	10000	1	26	0.001	0.006	0.001	0.003	0.001	0	0	0	0.007	0	0.005	289.122	0.851
2011001	10000	1	27	0.001	0.007	0.001	0.003	0.001	0	0	0	0.008	0	0.006	289.068	0.85
2011001	10000	1	28	0.001	0.007	0.001	0.003	0.001	0	0	0	0.008	0	0.006	288.961	0.854
2011001	10000	1	29	0.001	0.007	0.001	0.003	0.001	0	0	0	0.008	0	0.006	288.821	0.862
2011001	10000	1	30	0.001	0.007	0.001	0.003	0.001	0	0	0	0.009	0	0.006	288.776	0.863
2011001	10000	1	31	0.001	0.008	0.001	0.003	0.001	0	0	0	0.009	0	0.006	288.675	0.866
2011001	10000	1	32	0.001	0.008	0.001	0.003	0.001	0	0	0	0.009	0	0.006	288.631	0.868
2011001	10000	1	33	0.001	0.008	0.001	0.003	0.001	0	0	0	0.009	0	0.006	288.563	0.869
2011001	10000	1	34	0.001	0.008	0.001	0.003	0.001	0	0	0	0.009	0	0.006	288.488	0.872
2011001	10000	1	35	0.001	0.008	0	0.003	0.001	0	0	0	0.009	0	0.007	288.441	0.872
2011001	10000	1	36	0.001	0.008	0	0.003	0.001	0	0	0	0.009	0	0.007	288.34	0.874
2011001	10000	1	37	0.001	0.008	0	0.003	0.001	0	0	0	0.01	0	0.007	288.283	0.877
2011001	10000	1	38	0.001	0.009	0	0.003	0.001	0	0	0	0.01	0	0.007	288.218	0.876
2011001	10000	1	39	0.001	0.009	0	0.003	0.001	0	0	0	0.01	0	0.007	288.173	0.873
2011001	10000	1	40	0.001	0.01	0	0.003	0.001	0	0	0	0.01	0	0.007	288.138	0.872
2011001	10000	1	41	0.001	0.009	0	0.003	0.001	0	0	0	0.01	0	0.007	288.042	0.875
2011001	10000	1	42	0.001	0.009	0	0.003	0.001	0	0	0	0.01	0	0.007	287.942	0.881
2011001	10000	1	43	0.002	0.009	0	0.003	0.001	0	0	0	0.01	0	0.007	287.776	0.887
2011001	10000	1	44	0.002	0.009	0	0.003	0.001	0	0	0	0.01	0	0.007	287.639	0.891
2011001	10000	1	45	0.002	0.009	0	0.003	0.001	0	0	0	0.011	0	0.007	287.544	0.892
2011001	10000	1	46	0.003	0.009	0	0.003	0.001	0	0	0	0.011	0	0.007	287.408	0.893
2011001	10000	1	47	0.002	0.008	0	0.003	0.001	0	0	0	0.01	0	0.007	287.287	0.893
2011001	10000	1	48	0.002	0.009	0	0.003	0.001	0	0	0	0.01	0	0.007	287.153	0.892
2011001	10000	1	49	0.002	0.009	0	0.003	0.001	0	0	0	0.01	0	0.007	286.996	0.891
2011001	10000	1	50	0.002	0.009	0	0.003	0.001	0	0	0	0.01	0	0.007	286.855	0.892
2011001	10000	1	51	0.002	0.009	0	0.003	0.001	0	0	0	0.01	0	0.007	286.655	0.894
2011001	10000	1	52	0.002	0.009	0	0.003	0.001	0	0	0	0.01	0	0.007	286.495	0.894
2011001	10000	1	53	0.002	0.009	0	0.003	0.001	0	0	0	0.011	0	0.006	286.346	0.895
2011001	10000	1	54	0.003	0.009	0	0.003	0.001	0	0	0	0.011	0	0.007	286.282	0.892
2011001	10000	1	55	0.002	0.009	0	0.003	0.001	0	0	0	0.01	0	0.007	286.157	0.893
2011001	10000	1	56	0.002	0.008	0	0.003	0.001	0	0	0	0.01	0	0.007	285.923	0.896
2011001	10000	1	57	0.002	0.008	0	0.003	0.001	0	0	0	0.01	0	0.007	285.784	0.897
2011001	10000	1	58	0.002	0.008	0	0.003	0.001	0	0	0	0.01	0	0.007	285.677	0.896
2011001	10000	1	59	0.002	0.008	0	0.002	0.001	0	0	0	0.009	0	0.006	285.479	0.901
2011001	10000	1	60	0.001	0.008	0	0.002	0.001	0	0	0	0.01	0	0.006	285.377	0.902
2011001	10000	1	61	0.002	0.009	0	0.002	0.001	0	0	0	0.01	0	0.007	285.399	0.899
2011001	10000	1	62	0.001	0.008	0	0.002	0.001	0	0	0	0.01	0	0.006	285.092	0.904
2011001	10000	1	63	0.001	0.009	0	0.002	0.001	0	0	0	0.01	0	0.007	285.005	0.905
2011001	10000	1	64	0.001	0.009	0	0.002	0.001	0	0	0	0.011	0	0.007	284.865	0.906
2011001	10000	1	65	0.002	0.009	0	0.002	0.001	0	0	0	0.011	0	0.007	284.786	0.907
2011001	10000	1	66	0.002	0.01	0	0.002	0.001	0	0	0	0.012	0	0.007	284.696	0.908
2011001	10000	1	67	0.002	0.01	0	0.002	0.001	0	0	0	0.011	0	0.008	284.579	0.91
2011001	10000	1	68	0.001	0.01	0	0.001	0	0	0	0	0.012	0	0.008	284.485	0.908
2011001	10000	1	69	0.002	0.011	0	0.001	0	0	0	0	0.012	0	0.008	284.494	0.903
2011001	10000	1	70	0.002	0.011	0	0.001	0	0	0	0	0.012	0	0.008	284.405	0.899
2011001	10000	1	71	0.002	0.011	0	0.001	0	0	0	0	0.012	0	0.009	284.301	0.9
2011001	10000	1	72	0.002	0.011	0	0.001	0	0	0	0	0.012	0	0.009	284.231	0.901
2011001	10000	1	73	0.003	0.012	0	0.001	0	0	0	0	0.012	0	0.009	284.094	0.903
2011001	10000	1	74	0.003	0.012	0	0.001	0	0	0	0	0.012	0	0.009	284.039	0.9
2011001	10000	1	75	0.003	0.012	0	0.001	0	0	0	0	0.012	0	0.009	283.912	0.904
2011001	10000	1	76	0.003	0.012	0	0.001	0	0	0	0	0.012	0	0.009	283.815	0.903
2011001	10000	1	77	0.003	0.012	0	0.001	0	0	0	0	0.012	0	0.009	283.813	0.902
2011001	10000	1	78	0.004	0.012	0	0.001	0	0	0	0	0.012	0	0.009	283.699	0.905
2011001	10000	1	79	0.004	0.013	0	0.001	0	0	0	0	0.012	0	0.009	283.61	0.908
2011001	10000	1	80	0.004	0.012	0	0.001	0	0	0	0	0.012	0	0.009	283.493	0.911
2011001	10000	1	81	0.004	0.012	0	0.001	0	0	0	0	0.012	0	0.009	283.38	0.912
2011001	10000	1	82	0.004	0.013	0	0.001	0	0	0	0	0.012	0	0.009	283.311	0.913
2011001	10000	1	83	0.004	0.013	0	0.001	0	0	0	0	0.013	0	0.009	283.212	0.914
2011001	10000	1	84	0.004	0.013	0	0.001	0	0	0	0	0.012	0	0.009	283.085	0.914
2011001	10000	1	85	0.004	0.013	0	0.001	0	0	0	0	0.012	0	0.009	282.972	0.914
2011001	10000	1	86	0.004	0.013	0	0.001	0	0	0	0	0.013	0	0.01	282.838	0.915
2011001	10000	1	87	0.004	0.013	0	0.001	0	0	0	0	0.013	0	0.01	282.671	0.916
2011001	10000	1	88	0.004	0.013	0	0.001	0	0	0	0	0.013	0	0.01	282.541	0.917
2011001	10000	1	89	0.005	0.013	0	0.001	0	0	0	0	0.012	0	0.01	282.374	0.918
2011001	10000	1	90	0.005	0.012	0	0.002	0	0	0	0	0.012	0	0.009	282.218	0.92
2011001	10000	1	91	0.005	0.012	0	0.001	0	0	0	0	0.012	0	0.009	282.022	0.923
2011001	10000	1	92	0.004	0.012	0	0.001	0	0	0	0	0.012	0	0.009	281.793	0.925
2011001	10000	1	93	0.004	0.013	0	0.001	0	0	0	0	0.013	0	0.009	281.678	0.924
2011001	10000	1	94	0.004	0.012	0	0.001	0	0	0	0	0.013	0	0.009	281.573	0.919
2011001	10000	1	95	0.004	0.012	0	0.001	0	0	0	0	0.012	0	0.009	281.408	0.918
2011001	10000	1	96	0.004	0.012	0	0.002	0	0	0	0	0.012	0	0.009	281.32	0.911
2011001	10000	1	97	0.004	0.011	0	0.002	0.001	0	0	0	0.012	0	0.009	281.135	0.911
2011001	10000	1	98	0.004	0.011	0	0.002	0.001	0	0	0	0.012	0	0.009	280.965	0.91
2011001	10000	1	99	0.004	0.011	0	0.002	0.001	0	0	0	0.012	0	0.009	280.846	0.91
2011001	10000	1	100	0.006	0.011	0	0.002	0.001	0	0	0	0.013	0	0.008	280.659	0.911
2011001	10000	1	101	0.006	0.012	0	0.002	0.001	0	0	0	0.013	0	0.008	280.49	0.909
2011001	10000	1	102	0.004	0.012	0	0.002	0.001	0	0	0	0.013	0	0.008	280.458	0.901
2011001	10000	1	103	0.003	0.011	0	0.002	0.001	0	0	0	0.013	0	0.008	280.298	0.897
2011001	10000	1	104	0.004	0.011	0	0.002	0.001	0	0	0	0.012	0	0.008	280.175	0.892
2011001	10000	1	105	0.004	0.011	0	0.002	0.001	0	0	0	0.012	0	0.008	280.05	0.893
2011001	10000	1	106	0.004	0.011	0	0.002	0.001	0	0	0	0.012	0	0.008	279.933	0.894
2011001	10000	1	107	0.004	0.011	0	0.002	0.001	0	0	0	0.012	0	0.008	279.788	0.895
2011001	10000	1	108	0.004	0.011	0	0.002	0.001	0	0	0	0.012	0	0.008	279.684	0.893
2011001	10000	1	109	0.004	0.011	0	0.002	0.001	0	0	0	0.012	0	0.008	279.578	0.891
2011001	10000	1	110	0.005	0.011	0	0.002	0.001	0	0	0	0.011	0	0.008	279.485	0.888
2011001	10000	1	111	0.005	0.011	0	0.002	0.001	0	0	0	0.011	0	0.008	279.371	0.887
2011001	10000	1	112	0.006	0.01	0	0.001	0	0	0	0	0.011	0	0.008	279.219	0.886
2011001	10000	2	1	0	0.002	0	0.002	0.001	0	0	0	0.005	0	0.003	292.835	0.827
2011001	10000	2	2	0	0.003	0	0.002	0.001	0	0	0	0.005	0	0.003	292.635	0.822
2011001	10000	2	3	0	0.003	0	0.002	0.001	0	0	0	0.005	0	0.003	292.45	0.822
2011001	10000	2	4	0	0.003	0	0.002	0.001	0	0	0	0.005	0	0.003	292.246	0.821
2011001	10000	2	5	0	0.003	0	0.002	0.001	0	0	0	0.005	0	0.003	292.108	0.818
2011001	10000	2	6	0	0.003	0	0.002	0.001	0	0	0	0.005	0	0.003	291.906	0.818
2011001	10000	2	7	0	0.003	0	0.002	0.001	0	0	0	0.005	0	0.003	291.703	0.82
2011001	10000	2	8	0	0.003	0	0.002	0.001	0	0	0	0.005	0	0.004	291.611	0.816
2011001	10000	2	9	0	0.003	0	0.002	0.001	0	0	0	0.005	0	0.004	291.443	0.817
2011001	10000	2	10	0	0.003	0	0.002	0.001	0	0	0	0.005	0	0.004	291.328	0.815
2011001	10000	2	11	0	0.003	0.001	0.002	0.001	0	0	0	0.005	0	0.004	291.192	0.816
2011001	10000	2	12	0	0.004	0.001	0.002	0.001	0	0	0	0.005	0	0.004	291.078	0.816
2011001	10000	2	13	0	0.004	0.001	0.002	0.001	0	0	0	0.005	0	0.004	290.955	0.817
2011001	10000	2	14	0	0.004	0.001	0.002	0.001	0	0	0	0.005	0	0.004	290.828	0.819
2011001	10000	2	15	0	0.004	0.001	0.002	0.001	0	0	0	0.005	0	0.004	290.66	0.828
2011001	10000	2	16	0	0.004	0.001	0.002	0.001	0	0	0	0.005	0	0.004	290.478	0.833
2011001	10000	2	17	0	0.004	0.001	0.002	0.001	0	0	0	0.005	0	0.004	290.337	0.838
2011001	10000	2	18	0	0.004	0.001	0.002	0.001	0	0	0	0.006	0	0.004	290.138	0.842
2011001	10000	2	19	0	0.005	0.001	0.002	0.001	0	0	0	0.006	0	0.004	289.993	0.843
2011001	10000	2	20	0	0.005	0.001	0.003	0.001	0	0	0	0.006	0	0.004	289.804	0.847
2011001	10000	2	21	0	0.005	0.001	0.003	0.001	0	0	0	0.006	0	0.005	289.692	0.845
2011001	10000	2	22	0	0.005	0.001	0.003	0.001	0	0	0	0.007	0	0.005	289.511	0.849
2011001	10000	2	23	0	0.006	0.001	0.003	0.001	0	0	0	0.007	0	0.005	289.39	0.846
2011001	10000	2	24	0.001	0.006	0.001	0.003	0.001	0	0	0	0.007	0	0.005	289.269	0.848
2011001	10000	2	25	0.001	0.006	0.001	0.003	0.001	0	0	0	0.007	0	0.005	289.154	0.852
2011001	10000	2	26	0.001	0.006	0.001	0.003	0.001	0	0	0	0.007	0	0.005	289.064	0.853
2011001	10000	2	27	0.001	0.006	0.001	0.003	0.001	0	0	0	0.007	0	0.005	288.952	0.854
2011001	10000	2	28	0.001	0.006	0.001	0.003	0.001	0	0	0	0.008	0	0.006	288.874	0.857
2011001	10000	2	29	0.001	0.006	0.001	0.003	0.001	0	0	0	0.008	0	0.006	288.752	0.865
2011001	10000	2	30	0.001	0.007	0.001	0.004	0.001	0	0	0	0.008	0	0.006	288.671	0.867
2011001	10000	2	31	0.001	0.007	0.001	0.004	0.001	0	0	0	0.008	0	0.006	288.583	0.871
2011001	10000	2	32	0.001	0.007	0.001	0.004	0.001	0	0	0	0.008	0	0.006	288.513	0.873
2011001	10000	2	33	0.001	0.007	0.001	0.004	0.001	0	0	0	0.008	0	0.006	288.467	0.873
2011001	10000	2	34	0.001	0.007	0.001	0.004	0.001	0	0	0	0.008	0	0.006	288.412	0.873
2011001	10000	2	35	0.001	0.007	0	0.004	0.001	0	0	0	0.009	0	0.006	288.326	0.875
2011001	10000	2	36	0.001	0.007	0	0.004	0.001	0	0	0	0.009	0	0.006	288.264	0.877
2011001	10000	2	37	0.001	0.008	0	0.004	0.001	0	0	0	0.009	0	0.007	288.215	0.877
2011001	10000	2	38	0.001	0.008	0	0.004	0.001	0	0	0	0.009	0	0.007	288.165	0.874
2011001	10000	2	39	0.001	0.009	0	0.004	0.001	0	0	0	0.01	0	0.007	288.125	0.872
2011001	10000	2	40	0.001	0.009	0	0.003	0.001	0	0	0	0.01	0	0.007	288.041	0.873
2011001	10000	2	41	0.001	0.008	0	0.003	0.001	0	0	0	0.009	0	0.006	287.922	0.879
2011001	10000	2	42	0.001	0.008	0	0.003	0.001	0	0	0	0.01	0	0.006	287.841	0.883
2011001	10000	2	43	0.001	0.008	0	0.004	0.001	0	0	0	0.01	0	0.007	287.689	0.888
2011001	10000	2	44	0.001	0.008	0	0.004	0.001	0	0	0	0.01	0	0.007	287.568	0.891
2011001	10000	2	45	0.002	0.008	0	0.004	0.001	0	0	0	0.011	0	0.006	287.41	0.894
2011001	10000	2	46	0.002	0.008	0	0.004	0.001	0	0	0	0.011	0	0.006	287.273	0.896
2011001	10000	2	47	0.001	0.007	0	0.004	0.001	0	0	0	0.01	0	0.007	287.134	0.894
2011001	10000	2	48	0.001	0.008	0	0.004	0.001	0	0	0	0.01	0	0.007	286.998	0.893
2011001	10000	2	49	0.001	0.008	0	0.004	0.001	0	0	0	0.01	0.001	0.007	286.86	0.892
2011001	10000	2	50	0.001	0.008	0	0.004	0.001	0	0	0	0.01	0.001	0.007	286.71	0.891
2011001	10000	2	51	0.001	0.008	0	0.004	0.001	0	0	0	0.01	0.001	0.007	286.576	0.893
2011001	10000	2	52	0.002	0.008	0	0.004	0.001	0	0	0	0.01	0	0.007	286.459	0.893
2011001	10000	2	53	0.002	0.008	0	0.003	0.001	0	0	0	0.011	0	0.006	286.247	0.895
2011001	10000	2	54	0.002	0.008	0	0.003	0.001	0	0	0	0.01	0	0.006	286.143	0.895
2011001	10000	2	55	0.001	0.007	0	0.003	0.001	0	0	0	0.009	0	0.007	286.005	0.896
2011001	10000	2	56	0.001	0.007	0	0.003	0.001	0	0	0	0.009	0	0.007	285.866	0.896
2011001	10000	2	57	0.001	0.007	0	0.003	0.001	0	0	0	0.009	0	0.006	285.711	0.897
2011001	10000	2	58	0.001	0.006	0	0.003	0.001	0	0	0	0.009	0	0.006	285.524	0.899
2011001	10000	2	59	0.001	0.006	0	0.003	0.001	0	0	0	0.009	0	0.006	285.406	0.9
2011001	10000	2	60	0	0.006	0	0.003	0.001	0	0	0	0.009	0	0.006	285.231	0.902
2011001	10000	2	61	0	0.006	0	0.003	0.001	0	0	0	0.01	0	0.006	285.131	0.904
2011001	10000	2	62	0	0.006	0	0.002	0.001	0	0	0	0.01	0	0.006	285.016	0.904
2011001	10000	2	63	0.001	0.007	0	0.002	0.001	0	0	0	0.01	0	0.006	284.921	0.902
2011001	10000	2	64	0.001	0.007	0	0.002	0.001	0	0	0	0.01	0	0.006	284.796	0.904
2011001	10000	2	65	0.001	0.007	0	0.002	0.001	0	0	0	0.01	0	0.006	284.675	0.908
2011001	10000	2	66	0.001	0.007	0	0.002	0.001	0	0	0	0.011	0	0.007	284.519	0.911
2011001	10000	2	67	0	0.007	0	0.002	0.001	0	0	0	0.011	0	0.007	284.422	0.914
2011001	10000	2	68	0	0.008	0	0.002	0.001	0	0	0	0.011	0	0.007	284.369	0.912
2011001	10000	2	69	0	0.008	0	0.002	0.001	0	0	0	0.011	0	0.007	284.245	0.911
2011001	10000	2	70	0.001	0.008	0	0.002	0.001	0	0	0	0.011	0	0.008	284.195	0.907
2011001	10000	2	71	0.001	0.008	0	0.001	0.001	0	0	0	0.011	0	0.008	284.112	0.907
2011001	10000	2	72	0.001	0.009	0	0.001	0.001	0	0	0	0.011	0	0.008	283.958	0.908
2011001	10000	2	73	0.001	0.009	0	0.001	0	0	0	0	0.011	0	0.008	283.897	0.908
2011001	10000	2	74	0.001	0.009	0	0.001	0	0	0	0	0.012	0	0.008	283.837	0.904
2011001	10000	2	75	0.001	0.009	0	0.001	0	0	0	0	0.012	0	0.008	283.673	0.907
2011001	10000	2	76	0.002	0.01	0	0.001	0	0	0	0	0.012	0	0.008	283.624	0.908
2011001	10000	2	77	0.002	0.009	0	0.001	0	0	0	0	0.011	0	0.008	283.5	0.908
2011001	10000	2	78	0.002	0.009	0	0.001	0.001	0	0	0	0.012	0	0.008	283.398	0.911
2011001	10000	2	79	0.002	0.009	0	0.002	0.001	0	0	0	0.012	0	0.008	283.375	0.91
2011001	10000	2	80	0.002	0.01	0	0.002	0.001	0	0	0	0.012	0	0.008	283.279	0.909
2011001	10000	2	81	0.001	0.01	0	0.002	0.001	0	0	0	0.012	0	0.008	283.233	0.911
2011001	10000	2	82	0.002	0.009	0	0.002	0.001	0	0	0	0.012	0	0.009	283.133	0.913
2011001	10000	2	83	0.002	0.009	0	0.002	0.001	0	0	0	0.012	0	0.009	283.025	0.914
2011001	10000	2	84	0.002	0.009	0	0.002	0.001	0	0	0	0.012	0	0.009	282.996	0.912
2011001	10000	2	85	0.002	0.009	0	0.002	0.001	0	0	0	0.012	0	0.009	282.846	0.913
2011001	10000	2	86	0.002	0.009	0	0.002	0.001	0	0	0	0.012	0	0.009	282.695	0.913
2011001	10000	2	87	0.002	0.009	0	0.002	0.001	0	0	0	0.012	0	0.009	282.559	0.916
2011001	10000	2	88	0.002	0.009	0	0.002	0.001	0	0	0	0.012	0	0.009	282.39	0.92
2011001	10000	2	89	0.002	0.009	0	0.002	0.001	0	0	0	0.012	0	0.009	282.272	0.92
2011001	10000	2	90	0.003	0.009	0	0.002	0.001	0	0	0	0.012	0	0.009	282.106	0.921
2011001	10000	2	91	0.002	0.009	0	0.002	0.001	0	0	0	0.012	0	0.009	281.963	0.92
2011001	10000	2	92	0.002	0.009	0	0.002	0.001	0	0	0	0.012	0	0.009	281.773	0.925
2011001	10000	2	93	0.002	0.009	0	0.002	0.001	0	0	0	0.013	0	0.009	281.714	0.918
2011001	10000	2	94	0.002	0.008	0	0.002	0.001	0	0	0	0.012	0	0.009	281.532	0.917
2011001	10000	2	95	0.002	0.008	0	0.002	0.001	0	0	0	0.012	0	0.008	281.368	0.912
2011001	10000	2	96	0.002	0.008	0	0.002	0.001	0	0	0	0.012	0	0.008	281.244	0.91
2011001	10000	2	97	0.002	0.008	0	0.002	0.001	0	0	0	0.012	0	0.008	281.102	0.908
2011001	10000	2	98	0.002	0.008	0	0.003	0.001	0	0	0	0.012	0	0.008	280.993	0.908
2011001	10000	2	99	0.003	0.008	0	0.003	0.001	0	0	0	0.012	0	0.008	280.804	0.91
2011001	10000	2	100	0.006	0.008	0	0.003	0.001	0	0	0	0.013	0	0.008	280.687	0.911
2011001	10000	2	101	0.003	0.008	0	0.003	0.001	0	0	0	0.013	0	0.008	280.572	0.906
2011001	10000	2	102	0.002	0.008	0	0.003	0.001	0	0	0	0.013	0	0.008	280.42	0.903
2011001	10000	2	103	0.002	0.008	0	0.003	0.001	0	0	0	0.012	0	0.007	280.315	0.899
2011001	10000	2	104	0.002	0.008	0	0.003	0.001	0	0	0	0.012	0	0.007	280.198	0.895
2011001	10000	2	105	0.002	0.008	0	0.003	0.001	0	0	0	0.012	0	0.007	280.047	0.896
2011001	10000	2	106	0.002	0.008	0	0.003	0.001	0	0	0	0.012	0	0.007	279.929	0.897
2011001	10000	2	107	0.002	0.008	0	0.002	0.001	0	0	0	0.012	0	0.008	279.842	0.897
2011001	10000	2	108	0.002	0.008	0	0.003	0.001	0	0	0	0.012	0	0.008	279.705	0.894
2011001	10000	2	109	0.002	0.008	0	0.003	0.001	0	0	0	0.012	0	0.008	279.594	0.893
2011001	10000	2	110	0.003	0.008	0	0.002	0.001	0	0	0	0.011	0	0.008	279.52	0.889
2011001	10000	2	111	0.003	0.008	0	0.002	0.001	0	0	0	0.011	0	0.008	279.396	0.886
2011001	10000	2	112	0.004	0.007	0	0.002	0.001	0	0	0	0.011	0	0.007	279.252	0.886
2011001	10000	3	1	0	0.002	0	0.002	0.001	0	0	0	0.005	0	0.003	292.691	0.829
2011001	10000	3	2	0	0.003	0	0.002	0.001	0	0	0	0.005	0	0.003	292.553	0.826
2011001	10000	3	3	0	0.003	0	0.002	0.001	0	0	0	0.005	0	0.003	292.366	0.821
2011001	10000	3	4	0	0.003	0	0.002	0.001	0	0	0	0.004	0	0.003	292.15	0.822
2011001	10000	3	5	0	0.003	0	0.002	0.001	0	0	0	0.004	0	0.003	291.941	0.823
2011001	10000	3	6	0	0.003	0	0.002	0.001	0	0	0	0.004	0	0.003	291.805	0.819
2011001	10000	3	7	0	0.003	0	0.002	0.001	0	0	0	0.004	0	0.003	291.623	0.822
2011001	10000	3	8	0	0.003	0	0.002	0.001	0	0	0	0.004	0	0.003	291.461	0.819
2011001	10000	3	9	0	0.003	0	0.002	0.001	0	0	0	0.004	0	0.004	291.36	0.816
2011001	10000	3	10	0	0.003	0.001	0.002	0.001	0	0	0	0.004	0	0.004	291.2	0.817
2011001	10000	3	11	0	0.003	0.001	0.002	0.001	0	0	0	0.004	0	0.004	291.096	0.819
2011001	10000	3	12	0	0.003	0.001	0.002	0.001	0	0	0	0.005	0	0.004	290.963	0.819
2011001	10000	3	13	0	0.004	0.001	0.002	0.001	0	0	0	0.005	0	0.004	290.844	0.82
2011001	10000	3	14	0	0.004	0.001	0.002	0.001	0	0	0	0.005	0	0.004	290.727	0.823
2011001	10000	3	15	0	0.004	0.001	0.002	0.001	0	0	0	0.005	0	0.004	290.592	0.828
2011001	10000	3	16	0	0.004	0.001	0.002	0.001	0	0	0	0.005	0	0.004	290.409	0.834
2011001	10000	3	17	0	0.004	0.001	0.002	0.001	0	0	0	0.005	0	0.004	290.23	0.84
2011001	10000	3	18	0	0.005	0.001	0.002	0.001	0	0	0	0.005	0	0.004	290.057	0.843
2011001	10000	3	19	0	0.005	0.001	0.002	0.001	0	0	0	0.006	0	0.004	289.918	0.844
2011001	10000	3	20	0	0.005	0.001	0.002	0.001	0	0	0	0.006	0	0.004	289.74	0.849
2011001	10000	3	21	0	0.005	0.001	0.002	0.001	0	0	0	0.006	0	0.004	289.599	0.846
2011001	10000	3	22	0	0.005	0.001	0.003	0.001	0	0	0	0.006	0	0.005	289.447	0.849
2011001	10000	3	23	0	0.006	0.001	0.003	0.001	0	0	0	0.006	0	0.005	289.33	0.849
2011001	10000	3	24	0	0.006	0.001	0.003	0.001	0	0	0	0.007	0	0.005	289.19	0.851
2011001	10000	3	25	0	0.006	0.001	0.003	0.001	0	0	0	0.007	0	0.005	289.07	0.855
2011001	10000	3	26	0	0.006	0.001	0.003	0.001	0	0	0	0.007	0	0.005	288.974	0.856
2011001	10000	3	27	0	0.006	0.001	0.003	0.001	0	0	0	0.007	0	0.005	288.878	0.857
2011001	10000	3	28	0	0.006	0.001	0.003	0.001	0	0	0	0.008	0	0.005	288.78	0.862
2011001	10000	3	29	0	0.006	0.001	0.003	0.001	0	0	0	0.008	0	0.006	288.678	0.866
2011001	10000	3	30	0	0.006	0.001	0.004	0.001	0	0	0	0.008	0	0.006	288.575	0.871
2011001	10000	3	31	0	0.006	0.001	0.004	0.001	0	0	0	0.008	0	0.006	288.513	0.873
2011001	10000	3	32	0.001	0.006	0.001	0.004	0.001	0	0	0	0.008	0	0.006	288.423	0.876
2011001	10000	3	33	0.001	0.006	0.001	0.004	0.001	0	0	0	0.008	0	0.006	288.366	0.877
2011001	10000	3	34	0.001	0.006	0	0.004	0.001	0	0	0	0.008	0	0.006	288.269	0.882
2011001	10000	3	35	0.001	0.006	0	0.004	0.001	0	0	0	0.009	0	0.006	288.216	0.882
2011001	10000	3	36	0.001	0.007	0	0.004	0.001	0	0	0	0.009	0	0.006	288.133	0.881
2011001	10000	3	37	0.001	0.007	0	0.004	0.001	0	0.001	0	0.009	0	0.006	288.086	0.88
2011001	10000	3	38	0.001	0.008	0	0.004	0.001	0	0.001	0	0.009	0	0.006	288.055	0.877
2011001	10000	3	39	0.001	0.008	0	0.004	0.002	0	0	0	0.009	0	0.007	287.991	0.878
2011001	10000	3	40	0.001	0.008	0	0.004	0.002	0	0	0	0.009	0	0.006	287.934	0.877
2011001	10000	3	41	0.001	0.007	0	0.004	0.001	0	0	0	0.009	0	0.006	287.813	0.885
2011001	10000	3	42	0.001	0.008	0	0.004	0.001	0	0	0	0.01	0	0.006	287.708	0.887
2011001	10000	3	43	0.001	0.008	0	0.004	0.001	0	0	0	0.01	0	0.006	287.599	0.89
2011001	10000	3	44	0.001	0.008	0	0.004	0.001	0	0	0	0.01	0	0.006	287.434	0.893
2011001	10000	3	45	0.002	0.008	0	0.004	0.001	0	0	0	0.011	0	0.006	287.336	0.894
2011001	10000	3	46	0.002	0.007	0	0.004	0.001	0	0.001	0	0.01	0	0.006	287.142	0.895
2011001	10000	3	47	0.001	0.007	0	0.004	0.002	0	0.001	0	0.01	0	0.006	286.997	0.896
2011001	10000	3	48	0.001	0.007	0	0.004	0.002	0	0.001	0	0.01	0	0.007	286.897	0.895
2011001	10000	3	49	0.001	0.007	0	0.004	0.002	0	0.001	0	0.01	0	0.006	286.681	0.896
2011001	10000	3	50	0.001	0.007	0	0.004	0.002	0	0.001	0	0.01	0.001	0.006	286.55	0.896
2011001	10000	3	51	0.001	0.007	0	0.004	0.002	0	0.001	0	0.01	0.001	0.006	286.45	0.895
2011001	10000	3	52	0.002	0.007	0	0.004	0.001	0	0	0	0.01	0.001	0.006	286.274	0.896
2011001	10000	3	53	0.002	0.007	0	0.004	0.002	0	0	0	0.01	0	0.006	286.13	0.897
2011001	10000	3	54	0.001	0.007	0	0.004	0.002	0	0	0	0.009	0	0.006	286.021	0.898
2011001	10000	3	55	0.001	0.007	0	0.004	0.002	0	0	0	0.009	0	0.006	285.86	0.901
2011001	10000	3	56	0.001	0.006	0	0.004	0.001	0	0	0	0.009	0	0.006	285.718	0.901
2011001	10000	3	57	0	0.006	0	0.004	0.001	0	0	0	0.009	0	0.006	285.498	0.902
2011001	10000	3	58	0.001	0.005	0	0.004	0.001	0	0	0	0.009	0	0.006	285.417	0.902
2011001	10000	3	59	0.001	0.005	0	0.004	0.001	0	0	0	0.009	0	0.005	285.257	0.905
2011001	10000	3	60	0	0.005	0	0.003	0.001	0	0	0	0.009	0	0.005	285.129	0.908
2011001	10000	3	61	0	0.005	0	0.003	0.001	0	0	0	0.009	0	0.005	285.062	0.909
2011001	10000	3	62	0	0.005	0	0.003	0.001	0	0	0	0.009	0	0.006	284.937	0.909
2011001	10000	3	63	0	0.005	0	0.003	0.001	0	0	0	0.009	0	0.006	284.812	0.909
2011001	10000	3	64	0.001	0.006	0	0.002	0.001	0	0	0	0.009	0	0.006	284.736	0.908
2011001	10000	3	65	0.001	0.006	0	0.002	0.001	0	0	0	0.01	0	0.006	284.595	0.91
2011001	10000	3	66	0.001	0.006	0	0.002	0.001	0	0	0	0.01	0	0.006	284.466	0.916
2011001	10000	3	67	0	0.006	0	0.002	0.001	0	0	0	0.01	0	0.006	284.371	0.916
2011001	10000	3	68	0	0.006	0	0.002	0.001	0	0	0	0.01	0	0.007	284.226	0.916
2011001	10000	3	69	0	0.006	0	0.002	0.001	0	0	0	0.01	0	0.007	284.133	0.914
2011001	10000	3	70	0.001	0.007	0	0.002	0.001	0	0	0	0.01	0	0.007	284.055	0.913
2011001	10000	3	71	0.001	0.007	0	0.002	0.001	0	0	0	0.01	0	0.007	283.871	0.914
2011001	10000	3	72	0.001	0.007	0	0.002	0.001	0	0	0	0.01	0	0.007	283.793	0.915
2011001	10000	3	73	0.001	0.007	0	0.002	0.001	0	0	0	0.011	0	0.007	283.701	0.913
2011001	10000	3	74	0.001	0.007	0	0.002	0.001	0	0	0	0.011	0	0.007	283.59	0.911
2011001	10000	3	75	0.001	0.007	0	0.002	0.001	0	0	0	0.011	0	0.008	283.555	0.91
2011001	10000	3	76	0.001	0.008	0	0.002	0.001	0	0	0	0.011	0	0.008	283.441	0.912
2011001	10000	3	77	0.001	0.007	0	0.002	0.001	0	0	0	0.011	0	0.007	283.338	0.913
2011001	10000	3	78	0.001	0.008	0	0.002	0.001	0	0	0	0.011	0	0.008	283.31	0.912
2011001	10000	3	79	0.001	0.008	0	0.002	0.001	0	0	0	0.011	0	0.008	283.226	0.91
2011001	10000	3	80	0.001	0.008	0	0.002	0.001	0	0	0	0.011	0	0.008	283.116	0.91
2011001	10000	3	81	0.001	0.007	0	0.002	0.001	0	0	0	0.012	0	0.008	283.038	0.913
2011001	10000	3	82	0.001	0.007	0	0.002	0.001	0	0	0	0.011	0	0.008	282.91	0.915
2011001	10000	3	83	0.001	0.007	0	0.002	0.001	0	0	0	0.012	0	0.008	282.917	0.911
2011001	10000	3	84	0.001	0.007	0	0.003	0.001	0	0	0	0.012	0	0.008	282.805	0.913
2011001	10000	3	85	0.001	0.007	0	0.003	0.001	0	0	0	0.012	0	0.008	282.675	0.915
2011001	10000	3	86	0.001	0.007	0	0.003	0.001	0	0	0	0.012	0	0.008	282.599	0.913
2011001	10000	3	87	0.001	0.007	0	0.003	0.001	0	0	0	0.012	0	0.008	282.404	0.917
2011001	10000	3	88	0.001	0.007	0	0.003	0.001	0	0	0	0.012	0	0.008	282.314	0.917
2011001	10000	3	89	0.001	0.007	0	0.003	0.001	0	0	0	0.012	0	0.008	282.2	0.918
2011001	10000	3	90	0.001	0.006	0	0.003	0.001	0	0	0	0.011	0	0.008	282.044	0.919
2011001	10000	3	91	0.001	0.006	0	0.003	0.001	0	0	0	0.011	0	0.008	281.909	0.92
2011001	10000	3	92	0.001	0.007	0	0.003	0.001	0	0	0	0.012	0	0.008	281.806	0.919
2011001	10000	3	93	0.001	0.006	0	0.003	0.001	0	0	0	0.012	0	0.008	281.607	0.914
2011001	10000	3	94	0.001	0.006	0	0.003	0.001	0	0	0	0.011	0	0.008	281.481	0.911
2011001	10000	3	95	0.001	0.006	0	0.003	0.001	0	0	0	0.011	0	0.008	281.312	0.912
2011001	10000	3	96	0.001	0.006	0	0.003	0.001	0	0	0	0.011	0	0.008	281.181	0.911
2011001	10000	3	97	0.001	0.006	0	0.003	0.001	0	0	0	0.011	0	0.007	281.063	0.912
2011001	10000	3	98	0.002	0.007	0	0.003	0.001	0	0	0	0.012	0	0.008	280.935	0.913
2011001	10000	3	99	0.003	0.007	0	0.003	0.001	0	0	0	0.012	0	0.008	280.822	0.912
2011001	10000	3	100	0.005	0.007	0	0.003	0.001	0	0	0	0.013	0	0.007	280.708	0.908
2011001	10000	3	101	0.003	0.007	0	0.003	0.001	0	0	0	0.012	0	0.007	280.568	0.904
2011001	10000	3	102	0.002	0.007	0	0.003	0.001	0	0	0	0.012	0	0.007	280.417	0.902
2011001	10000	3	103	0.001	0.007	0	0.003	0.001	0	0	0	0.012	0	0.007	280.288	0.901
2011001	10000	3	104	0.001	0.006	0	0.003	0.001	0	0	0	0.011	0	0.007	280.145	0.898
2011001	10000	3	105	0.001	0.006	0	0.003	0.001	0	0	0	0.011	0	0.007	280.061	0.896
2011001	10000	3	106	0.001	0.006	0	0.003	0.001	0	0	0	0.012	0	0.007	279.937	0.898
2011001	10000	3	107	0.001	0.007	0	0.003	0.001	0	0	0	0.012	0	0.007	279.8	0.896
2011001	10000	3	108	0.001	0.006	0	0.003	0.001	0	0	0	0.011	0	0.007	279.732	0.894
2011001	10000	3	109	0.002	0.006	0	0.003	0.001	0	0	0	0.011	0	0.007	279.639	0.891
2011001	10000	3	110	0.002	0.006	0	0.003	0.001	0	0	0	0.011	0	0.007	279.51	0.887
2011001	10000	3	111	0.002	0.006	0	0.003	0.001	0	0	0	0.011	0	0.007	279.4	0.884
2011001	10000	3	112	0.003	0.006	0	0.003	0.001	0	0	0	0.011	0	0.007	279.327	0.879
2011001	10000	4	1	0	0.002	0	0.002	0.001	0	0	0	0.005	0	0.003	292.556	0.832
2011001	10000	4	2	0	0.002	0	0.002	0.001	0	0	0	0.005	0	0.003	292.396	0.828
2011001	10000	4	3	0	0.003	0	0.002	0.001	0	0	0	0.004	0	0.003	292.219	0.827
2011001	10000	4	4	0	0.003	0	0.002	0.001	0	0	0	0.004	0	0.003	292.042	0.824
2011001	10000	4	5	0	0.003	0	0.002	0.001	0	0	0	0.004	0	0.003	291.854	0.822
2011001	10000	4	6	0	0.003	0	0.002	0.001	0	0	0	0.004	0	0.003	291.703	0.822
2011001	10000	4	7	0	0.003	0	0.002	0.001	0	0	0	0.004	0	0.003	291.495	0.825
2011001	10000	4	8	0	0.003	0	0.002	0.001	0	0	0	0.004	0	0.003	291.376	0.824
2011001	10000	4	9	0	0.003	0	0.002	0.001	0	0	0	0.004	0	0.003	291.239	0.821
2011001	10000	4	10	0	0.003	0.001	0.002	0.001	0	0	0	0.004	0	0.004	291.109	0.822
2011001	10000	4	11	0	0.003	0.001	0.002	0.001	0	0	0	0.004	0	0.004	290.951	0.823
2011001	10000	4	12	0	0.003	0.001	0.002	0.001	0	0	0	0.005	0	0.004	290.839	0.824
2011001	10000	4	13	0	0.004	0.001	0.002	0.001	0	0	0	0.005	0	0.004	290.726	0.824
2011001	10000	4	14	0	0.004	0.001	0.002	0.001	0	0	0	0.005	0	0.004	290.609	0.827
2011001	10000	4	15	0	0.004	0.001	0.002	0.001	0	0	0	0.005	0	0.004	290.494	0.829
2011001	10000	4	16	0	0.004	0.001	0.002	0.001	0	0	0	0.005	0	0.004	290.265	0.839
2011001	10000	4	17	0	0.004	0.001	0.002	0.001	0	0	0	0.005	0	0.004	290.143	0.84
2011001	10000	4	18	0	0.005	0.001	0.002	0.001	0	0	0	0.005	0	0.004	289.982	0.844
2011001	10000	4	19	0	0.005	0.001	0.002	0.001	0	0	0	0.006	0	0.004	289.805	0.845
2011001	10000	4	20	0	0.005	0.001	0.002	0.001	0	0	0	0.006	0	0.004	289.659	0.848
2011001	10000	4	21	0	0.005	0.001	0.002	0.001	0	0	0	0.006	0	0.004	289.524	0.847
2011001	10000	4	22	0	0.005	0.001	0.002	0.001	0	0	0	0.006	0	0.004	289.363	0.852
2011001	10000	4	23	0	0.005	0.001	0.003	0.001	0	0	0	0.006	0	0.004	289.223	0.854
2011001	10000	4	24	0	0.005	0.001	0.003	0.001	0	0	0	0.006	0	0.004	289.104	0.856
2011001	10000	4	25	0	0.005	0.001	0.003	0.001	0	0	0	0.007	0	0.005	289	0.857
2011001	10000	4	26	0	0.005	0.001	0.003	0.001	0	0	0	0.007	0	0.005	288.911	0.858
2011001	10000	4	27	0	0.005	0.001	0.003	0.001	0	0	0	0.007	0	0.005	288.789	0.859
2011001	10000	4	28	0	0.006	0.001	0.003	0.001	0	0	0	0.008	0	0.005	288.69	0.862
2011001	10000	4	29	0	0.006	0.001	0.003	0.001	0	0	0	0.008	0	0.005	288.594	0.868
2011001	10000	4	30	0	0.006	0.001	0.004	0.001	0	0	0	0.008	0	0.006	288.523	0.872
2011001	10000	4	31	0	0.006	0.001	0.004	0.001	0	0	0	0.008	0	0.006	288.419	0.878
2011001	10000	4	32	0	0.006	0.001	0.004	0.001	0	0	0	0.008	0	0.006	288.319	0.884
2011001	10000	4	33	0	0.006	0	0.004	0.001	0	0	0	0.008	0	0.005	288.229	0.887
2011001	10000	4	34	0	0.006	0	0.004	0.001	0	0.001	0	0.008	0	0.006	288.228	0.882
2011001	10000	4	35	0	0.006	0	0.004	0.001	0	0.001	0	0.009	0	0.006	288.119	0.883
2011001	10000	4	36	0	0.006	0	0.004	0.002	0	0.001	0	0.009	0	0.006	288.063	0.882
2011001	10000	4	37	0.001	0.007	0	0.004	0.002	0	0.001	0	0.009	0	0.006	288.014	0.88
2011001	10000	4	38	0.001	0.007	0	0.004	0.002	0	0.001	0	0.009	0	0.006	287.909	0.884
2011001	10000	4	39	0.001	0.008	0	0.004	0.002	0	0.001	0	0.009	0	0.006	287.897	0.882
2011001	10000	4	40	0.001	0.008	0	0.004	0.002	0	0.001	0	0.009	0	0.006	287.796	0.885
2011001	10000	4	41	0.001	0.007	0	0.004	0.002	0	0.001	0	0.009	0	0.006	287.668	0.89
2011001	10000	4	42	0.001	0.008	0	0.004	0.002	0	0.001	0	0.01	0	0.006	287.572	0.891
2011001	10000	4	43	0.001	0.008	0	0.004	0.002	0	0.001	0	0.01	0	0.006	287.458	0.893
2011001	10000	4	44	0.001	0.008	0	0.004	0.002	0	0.001	0	0.01	0	0.006	287.358	0.894
2011001	10000	4	45	0.002	0.008	0	0.004	0.002	0	0.001	0	0.01	0	0.006	287.189	0.897
2011001	10000	4	46	0.001	0.007	0	0.004	0.002	0	0.001	0	0.01	0	0.006	287.027	0.898
2011001	10000	4	47	0.001	0.007	0	0.004	0.002	0	0.001	0	0.01	0	0.006	286.93	0.898
2011001	10000	4	48	0.001	0.007	0	0.004	0.002	0	0.001	0	0.01	0	0.006	286.737	0.899
2011001	10000	4	49	0.001	0.007	0	0.004	0.002	0	0.001	0	0.01	0	0.006	286.63	0.9
2011001	10000	4	50	0.001	0.007	0	0.004	0.002	0	0.001	0	0.01	0.001	0.006	286.49	0.899
2011001	10000	4	51	0.001	0.007	0	0.004	0.002	0	0.001	0	0.01	0.001	0.006	286.306	0.901
2011001	10000	4	52	0.002	0.007	0	0.004	0.002	0	0.001	0	0.01	0.001	0.006	286.202	0.9
2011001	10000	4	53	0.002	0.007	0	0.004	0.002	0	0.001	0	0.009	0.001	0.006	286.056	0.901
2011001	10000	4	54	0.001	0.006	0	0.004	0.002	0	0.001	0	0.009	0.001	0.006	285.863	0.905
2011001	10000	4	55	0.001	0.006	0	0.004	0.002	0	0.001	0	0.009	0.001	0.006	285.737	0.906
2011001	10000	4	56	0	0.006	0	0.004	0.002	0	0.001	0	0.008	0.001	0.006	285.637	0.905
2011001	10000	4	57	0	0.006	0	0.004	0.001	0	0	0	0.008	0	0.006	285.447	0.908
2011001	10000	4	58	0	0.005	0	0.004	0.001	0	0	0	0.008	0	0.005	285.279	0.909
2011001	10000	4	59	0	0.005	0	0.004	0.001	0	0	0	0.009	0	0.005	285.161	0.91
2011001	10000	4	60	0	0.005	0	0.004	0.001	0	0	0	0.008	0	0.005	285.092	0.911
2011001	10000	4	61	0	0.005	0	0.003	0.001	0	0	0	0.008	0	0.005	284.963	0.913
2011001	10000	4	62	0	0.005	0	0.003	0.001	0	0	0	0.008	0	0.005	284.858	0.914
2011001	10000	4	63	0	0.005	0	0.003	0.001	0	0	0	0.008	0	0.005	284.764	0.914
2011001	10000	4	64	0.001	0.005	0	0.003	0.001	0	0	0	0.009	0	0.005	284.633	0.915
2011001	10000	4	65	0.001	0.005	0	0.003	0.001	0	0	0	0.009	0	0.005	284.542	0.916
2011001	10000	4	66	0	0.005	0	0.002	0.001	0	0	0	0.009	0	0.005	284.412	0.919
2011001	10000	4	67	0	0.005	0	0.002	0.001	0	0	0	0.009	0	0.006	284.25	0.92
2011001	10000	4	68	0	0.005	0	0.002	0.001	0	0	0	0.009	0	0.006	284.165	0.918
2011001	10000	4	69	0	0.005	0	0.002	0.001	0	0	0	0.01	0	0.006	284.04	0.918
2011001	10000	4	70	0	0.006	0	0.002	0.001	0	0	0	0.01	0	0.006	283.887	0.916
2011001	10000	4	71	0.001	0.006	0	0.002	0.001	0	0	0	0.01	0	0.007	283.794	0.916
2011001	10000	4	72	0.001	0.006	0	0.002	0.001	0	0	0	0.01	0	0.007	283.628	0.916
2011001	10000	4	73	0.001	0.006	0	0.002	0.001	0	0	0	0.01	0	0.007	283.486	0.918
2011001	10000	4	74	0.001	0.006	0	0.002	0.001	0	0	0	0.01	0	0.007	283.495	0.915
2011001	10000	4	75	0.001	0.006	0	0.002	0.001	0	0	0	0.01	0	0.007	283.351	0.917
2011001	10000	4	76	0.001	0.007	0	0.002	0.001	0	0	0	0.01	0	0.007	283.278	0.915
2011001	10000	4	77	0.001	0.007	0	0.002	0.001	0	0	0	0.01	0	0.007	283.265	0.914
2011001	10000	4	78	0.001	0.007	0	0.002	0.001	0	0	0	0.011	0	0.007	283.155	0.914
2011001	10000	4	79	0.001	0.007	0	0.002	0.001	0	0	0	0.011	0	0.007	283.088	0.914
2011001	10000	4	80	0.001	0.007	0	0.002	0.001	0	0	0	0.011	0	0.008	283.038	0.912
2011001	10000	4	81	0.001	0.006	0	0.002	0.001	0	0	0	0.011	0	0.008	282.864	0.915
2011001	10000	4	82	0.001	0.006	0	0.003	0.001	0	0	0	0.011	0	0.007	282.771	0.914
2011001	10000	4	83	0.001	0.006	0	0.003	0.001	0	0	0	0.011	0	0.007	282.691	0.915
2011001	10000	4	84	0.001	0.006	0	0.003	0.001	0	0	0	0.011	0	0.007	282.616	0.914
2011001	10000	4	85	0.001	0.006	0	0.003	0.001	0	0	0	0.011	0	0.007	282.506	0.914
2011001	10000	4	86	0.001	0.006	0	0.003	0.001	0	0	0	0.011	0	0.007	282.427	0.913
2011001	10000	4	87	0.001	0.005	0	0.003	0.001	0	0	0	0.011	0	0.007	282.307	0.914
2011001	10000	4	88	0.001	0.005	0	0.003	0.001	0	0	0	0.011	0	0.007	282.2	0.915
2011001	10000	4	89	0.001	0.005	0	0.003	0.001	0	0	0	0.011	0	0.007	282.055	0.917
2011001	10000	4	90	0.001	0.005	0	0.003	0.001	0	0	0	0.011	0	0.007	281.986	0.916
2011001	10000	4	91	0.001	0.005	0	0.003	0.001	0	0	0	0.011	0	0.007	281.876	0.917
2011001	10000	4	92	0.001	0.005	0	0.003	0.001	0	0	0	0.011	0	0.008	281.73	0.918
2011001	10000	4	93	0.001	0.005	0	0.003	0.001	0	0	0	0.011	0	0.007	281.59	0.914
2011001	10000	4	94	0.001	0.005	0	0.003	0.001	0	0	0	0.011	0	0.007	281.436	0.912
2011001	10000	4	95	0.001	0.005	0	0.003	0.001	0	0	0	0.01	0	0.007	281.281	0.912
2011001	10000	4	96	0.001	0.005	0	0.003	0.001	0	0	0	0.01	0	0.007	281.168	0.915
2011001	10000	4	97	0.001	0.005	0	0.003	0.001	0	0	0	0.011	0	0.007	281.035	0.915
2011001	10000	4	98	0.001	0.006	0	0.003	0.001	0	0	0	0.011	0	0.007	280.905	0.914
2011001	10000	4	99	0.005	0.006	0	0.004	0.001	0	0	0	0.012	0	0.007	280.81	0.912
2011001	10000	4	100	0.003	0.006	0	0.004	0.001	0	0	0	0.012	0	0.007	280.658	0.911
2011001	10000	4	101	0.002	0.006	0	0.004	0.001	0	0	0	0.012	0	0.006	280.519	0.909
2011001	10000	4	102	0.001	0.006	0	0.004	0.001	0	0	0	0.012	0	0.006	280.389	0.907
2011001	10000	4	103	0.001	0.005	0	0.004	0.001	0	0	0	0.011	0	0.006	280.259	0.902
2011001	10000	4	104	0.001	0.005	0	0.003	0.001	0	0	0	0.011	0	0.006	280.146	0.898
2011001	10000	4	105	0.001	0.005	0	0.003	0.001	0	0	0	0.011	0	0.006	280.065	0.896
2011001	10000	4	106	0.001	0.005	0	0.003	0.001	0	0	0	0.011	0	0.006	279.937	0.896
2011001	10000	4	107	0.001	0.005	0	0.003	0.001	0	0	0	0.011	0	0.006	279.844	0.894
2011001	10000	4	108	0.001	0.005	0	0.004	0.001	0	0	0	0.011	0	0.007	279.738	0.891
2011001	10000	4	109	0.001	0.005	0	0.003	0.001	0	0	0	0.011	0	0.006	279.633	0.889
2011001	10000	4	110	0.002	0.005	0	0.003	0.001	0	0	0	0.011	0	0.006	279.55	0.885
2011001	10000	4	111	0.002	0.005	0	0.003	0.001	0	0	0	0.01	0	0.006	279.413	0.882
2011001	10000	4	112	0.003	0.004	0	0.003	0.001	0	0	0	0.01	0	0.006	279.288	0.877
2011001	10000	5	1	0	0.002	0	0.002	0.001	0	0	0	0.005	0	0.003	292.47	0.833
2011001	10000	5	2	0	0.002	0	0.002	0.001	0	0	0	0.005	0	0.003	292.284	0.83
2011001	10000	5	3	0	0.003	0	0.002	0.001	0	0	0	0.005	0	0.003	292.117	0.827
2011001	10000	5	4	0	0.003	0	0.002	0.001	0	0	0	0.004	0	0.003	291.892	0.827
2011001	10000	5	5	0	0.003	0	0.002	0.001	0	0	0	0.004	0	0.003	291.747	0.824
2011001	10000	5	6	0	0.003	0	0.002	0.001	0	0	0	0.004	0	0.003	291.589	0.824
2011001	10000	5	7	0	0.003	0	0.002	0.001	0	0	0	0.004	0	0.003	291.391	0.827
2011001	10000	5	8	0	0.003	0	0.002	0.001	0	0	0	0.004	0	0.003	291.243	0.827
2011001	10000	5	9	0	0.003	0	0.002	0.001	0	0	0	0.004	0	0.003	291.104	0.826
2011001	10000	5	10	0	0.003	0.001	0.002	0.001	0	0	0	0.004	0	0.004	290.989	0.826
2011001	10000	5	11	0	0.003	0.001	0.002	0.001	0	0	0	0.005	0	0.004	290.849	0.827
2011001	10000	5	12	0	0.004	0.001	0.002	0.001	0	0	0	0.005	0	0.004	290.747	0.827
2011001	10000	5	13	0	0.004	0.001	0.002	0.001	0	0	0	0.005	0	0.004	290.602	0.828
2011001	10000	5	14	0	0.004	0.001	0.002	0.001	0	0	0	0.005	0	0.004	290.51	0.828
2011001	10000	5	15	0	0.004	0.001	0.002	0.001	0	0	0	0.005	0	0.004	290.403	0.83
2011001	10000	5	16	0	0.004	0.001	0.002	0.001	0	0	0	0.005	0	0.004	290.209	0.837
2011001	10000	5	17	0	0.005	0.001	0.002	0.001	0	0	0	0.005	0	0.004	290.038	0.84
2011001	10000	5	18	0	0.005	0.001	0.002	0.001	0	0	0	0.005	0	0.004	289.876	0.845
2011001	10000	5	19	0	0.005	0.001	0.002	0.001	0	0	0	0.005	0	0.004	289.712	0.849
2011001	10000	5	20	0	0.004	0.001	0.002	0.001	0	0	0	0.006	0	0.004	289.556	0.853
2011001	10000	5	21	0	0.005	0.001	0.002	0.001	0	0	0	0.006	0	0.004	289.404	0.855
2011001	10000	5	22	0	0.005	0.001	0.002	0.001	0	0	0	0.006	0	0.004	289.26	0.855
2011001	10000	5	23	0	0.005	0.001	0.003	0.001	0	0	0	0.006	0	0.004	289.094	0.86
2011001	10000	5	24	0	0.005	0.001	0.003	0.001	0	0	0	0.006	0	0.004	288.988	0.862
2011001	10000	5	25	0	0.005	0.001	0.003	0.001	0	0	0	0.006	0	0.004	288.878	0.862
2011001	10000	5	26	0	0.005	0.001	0.003	0.001	0	0	0	0.007	0	0.005	288.805	0.862
2011001	10000	5	27	0	0.005	0.001	0.003	0.001	0	0	0	0.007	0	0.005	288.674	0.865
2011001	10000	5	28	0	0.005	0.001	0.003	0.001	0	0	0	0.007	0	0.005	288.602	0.867
2011001	10000	5	29	0	0.006	0.001	0.003	0.001	0	0	0	0.008	0	0.005	288.505	0.867
2011001	10000	5	30	0	0.006	0.001	0.004	0.001	0	0	0	0.008	0	0.005	288.401	0.874
2011001	10000	5	31	0	0.005	0.001	0.004	0.001	0	0	0	0.008	0	0.005	288.306	0.881
2011001	10000	5	32	0	0.005	0	0.004	0.001	0	0	0	0.008	0	0.005	288.209	0.887
2011001	10000	5	33	0	0.005	0	0.004	0.001	0	0.001	0	0.008	0	0.005	288.136	0.889
2011001	10000	5	34	0	0.005	0	0.004	0.002	0	0.001	0	0.008	0	0.005	288.093	0.887
2011001	10000	5	35	0	0.005	0	0.004	0.002	0	0.001	0	0.008	0	0.005	288.057	0.884
2011001	10000	5	36	0	0.006	0	0.004	0.002	0	0.001	0	0.009	0	0.006	287.979	0.885
2011001	10000	5	37	0	0.006	0	0.004	0.002	0	0.001	0	0.009	0	0.006	287.889	0.887
2011001	10000	5	38	0	0.007	0	0.004	0.002	0	0.001	0	0.009	0	0.006	287.847	0.888
2011001	10000	5	39	0	0.007	0	0.004	0.002	0	0.001	0	0.009	0	0.006	287.773	0.889
2011001	10000	5	40	0	0.008	0	0.004	0.002	0	0.001	0	0.009	0	0.006	287.701	0.889
2011001	10000	5	41	0	0.007	0	0.004	0.002	0	0.001	0	0.009	0	0.006	287.604	0.892
2011001	10000	5	42	0.001	0.008	0	0.004	0.002	0	0.001	0	0.01	0	0.006	287.486	0.894
2011001	10000	5	43	0.001	0.008	0	0.004	0.002	0	0.001	0	0.01	0	0.006	287.377	0.896
2011001	10000	5	44	0.001	0.008	0	0.004	0.002	0	0.001	0	0.01	0	0.006	287.234	0.898
2011001	10000	5	45	0.002	0.008	0	0.004	0.002	0	0.001	0	0.01	0	0.006	287.094	0.9
2011001	10000	5	46	0.001	0.007	0	0.004	0.002	0	0.001	0	0.01	0	0.006	286.975	0.901
2011001	10000	5	47	0.001	0.007	0	0.005	0.002	0	0.001	0	0.009	0.001	0.006	286.801	0.904
2011001	10000	5	48	0.001	0.008	0	0.005	0.002	0	0.001	0	0.01	0.001	0.006	286.679	0.905
2011001	10000	5	49	0.001	0.008	0	0.005	0.002	0	0.001	0	0.01	0.001	0.006	286.529	0.906
2011001	10000	5	50	0.001	0.008	0	0.005	0.002	0	0.001	0	0.01	0.001	0.006	286.367	0.906
2011001	10000	5	51	0.002	0.008	0	0.005	0.002	0	0.001	0	0.01	0.001	0.006	286.282	0.904
2011001	10000	5	52	0.002	0.007	0	0.005	0.002	0	0.001	0	0.01	0.001	0.006	286.072	0.907
2011001	10000	5	53	0.002	0.006	0	0.005	0.002	0	0.001	0	0.009	0.001	0.006	285.87	0.91
2011001	10000	5	54	0.001	0.007	0	0.004	0.002	0	0.001	0	0.008	0.001	0.006	285.798	0.908
2011001	10000	5	55	0	0.007	0	0.004	0.002	0	0.001	0	0.008	0.001	0.006	285.613	0.91
2011001	10000	5	56	0	0.006	0	0.004	0.002	0	0.001	0	0.008	0.001	0.006	285.546	0.909
2011001	10000	5	57	0	0.006	0	0.004	0.002	0	0.001	0	0.008	0.001	0.006	285.356	0.91
2011001	10000	5	58	0	0.005	0	0.004	0.001	0	0.001	0	0.008	0	0.005	285.144	0.912
2011001	10000	5	59	0	0.004	0	0.004	0.001	0	0	0	0.008	0	0.005	285.086	0.913
2011001	10000	5	60	0	0.004	0	0.004	0.001	0	0	0	0.008	0	0.005	284.947	0.914
2011001	10000	5	61	0	0.004	0	0.004	0.001	0	0	0	0.008	0	0.005	284.847	0.916
2011001	10000	5	62	0	0.004	0	0.004	0.001	0	0	0	0.008	0	0.005	284.765	0.918
2011001	10000	5	63	0	0.004	0	0.003	0.001	0	0	0	0.008	0	0.005	284.634	0.918
2011001	10000	5	64	0.001	0.005	0	0.003	0.001	0	0	0	0.008	0	0.005	284.58	0.916
2011001	10000	5	65	0	0.005	0	0.003	0.001	0	0	0	0.008	0	0.005	284.439	0.919
2011001	10000	5	66	0	0.005	0	0.003	0.001	0	0	0	0.008	0	0.005	284.322	0.919
2011001	10000	5	67	0	0.005	0	0.003	0.001	0	0	0	0.008	0	0.005	284.249	0.919
2011001	10000	5	68	0	0.005	0	0.002	0.001	0	0	0	0.008	0	0.005	284.08	0.919
2011001	10000	5	69	0	0.005	0	0.002	0.001	0	0	0	0.009	0	0.006	283.941	0.919
2011001	10000	5	70	0	0.005	0	0.002	0.001	0	0	0	0.009	0	0.006	283.802	0.918
2011001	10000	5	71	0	0.005	0	0.002	0.001	0	0	0	0.009	0	0.006	283.637	0.917
2011001	10000	5	72	0	0.005	0	0.002	0.001	0	0	0	0.009	0	0.006	283.489	0.917
2011001	10000	5	73	0	0.005	0	0.002	0.001	0	0	0	0.009	0	0.006	283.433	0.915
2011001	10000	5	74	0	0.005	0	0.002	0.001	0	0	0	0.009	0	0.006	283.31	0.915
2011001	10000	5	75	0	0.005	0	0.002	0.001	0	0	0	0.01	0	0.007	283.216	0.917
2011001	10000	5	76	0	0.006	0	0.002	0.001	0	0	0	0.01	0	0.007	283.184	0.915
2011001	10000	5	77	0	0.006	0	0.002	0.001	0	0	0	0.01	0	0.007	283.069	0.917
2011001	10000	5	78	0.001	0.006	0	0.002	0.001	0	0	0	0.01	0	0.007	283.029	0.918
2011001	10000	5	79	0.001	0.006	0	0.002	0.001	0	0	0	0.01	0	0.007	282.985	0.916
2011001	10000	5	80	0	0.006	0	0.003	0.001	0	0	0	0.011	0	0.007	282.861	0.918
2011001	10000	5	81	0	0.006	0	0.003	0.001	0	0	0	0.011	0	0.007	282.794	0.917
2011001	10000	5	82	0.001	0.005	0	0.003	0.001	0	0	0	0.011	0	0.007	282.71	0.914
2011001	10000	5	83	0.001	0.005	0	0.003	0.001	0	0	0	0.011	0	0.007	282.585	0.916
2011001	10000	5	84	0.001	0.005	0	0.003	0.001	0	0	0	0.011	0	0.007	282.505	0.915
2011001	10000	5	85	0.001	0.005	0	0.003	0.001	0	0	0	0.011	0	0.007	282.421	0.913
2011001	10000	5	86	0.001	0.005	0	0.003	0.001	0	0	0	0.011	0	0.007	282.295	0.912
2011001	10000	5	87	0.001	0.005	0	0.003	0.001	0	0	0	0.011	0	0.007	282.215	0.913
2011001	10000	5	88	0.001	0.004	0	0.003	0.001	0	0	0	0.01	0	0.007	282.112	0.913
2011001	10000	5	89	0.001	0.004	0	0.004	0.001	0	0	0	0.01	0	0.007	281.965	0.915
2011001	10000	5	90	0.001	0.004	0	0.003	0.001	0	0	0	0.01	0	0.007	281.847	0.918
2011001	10000	5	91	0.001	0.004	0	0.003	0.001	0	0	0	0.01	0	0.007	281.734	0.918
2011001	10000	5	92	0.001	0.004	0	0.003	0.001	0	0	0	0.01	0	0.007	281.609	0.915
2011001	10000	5	93	0.001	0.004	0	0.004	0.001	0	0	0	0.01	0	0.007	281.523	0.915
2011001	10000	5	94	0.001	0.004	0	0.004	0.001	0	0	0	0.01	0	0.007	281.341	0.918
2011001	10000	5	95	0.001	0.004	0	0.003	0.001	0	0	0	0.01	0	0.006	281.241	0.918
2011001	10000	5	96	0.001	0.004	0	0.003	0.001	0	0	0	0.01	0	0.006	281.088	0.918
2011001	10000	5	97	0.001	0.005	0	0.004	0.001	0	0	0	0.01	0	0.006	280.892	0.918
2011001	10000	5	98	0.002	0.005	0	0.004	0.001	0	0	0	0.011	0	0.007	280.891	0.914
2011001	10000	5	99	0.004	0.005	0	0.004	0.001	0	0	0	0.011	0	0.006	280.739	0.912
2011001	10000	5	100	0.002	0.005	0	0.004	0.001	0	0	0	0.011	0	0.006	280.578	0.91
2011001	10000	5	101	0.001	0.005	0	0.004	0.001	0	0	0	0.011	0	0.006	280.503	0.907
2011001	10000	5	102	0.001	0.005	0	0.004	0.001	0	0	0	0.011	0	0.006	280.366	0.903
2011001	10000	5	103	0.001	0.005	0	0.004	0.001	0	0	0	0.011	0	0.006	280.229	0.898
2011001	10000	5	104	0.001	0.005	0	0.004	0.001	0	0	0	0.011	0	0.006	280.161	0.894
2011001	10000	5	105	0.001	0.005	0	0.004	0.001	0	0	0	0.011	0	0.006	280.032	0.891
2011001	10000	5	106	0.001	0.005	0	0.004	0.001	0	0	0	0.011	0	0.006	279.92	0.891
2011001	10000	5	107	0.001	0.005	0	0.004	0.001	0	0	0	0.011	0	0.006	279.847	0.889
2011001	10000	5	108	0.001	0.004	0	0.004	0.001	0	0	0	0.011	0	0.006	279.748	0.887
2011001	10000	5	109	0.001	0.004	0	0.004	0.001	0	0	0	0.011	0	0.006	279.647	0.886
2011001	10000	5	110	0.001	0.004	0	0.004	0.001	0	0	0	0.011	0	0.006	279.524	0.881
2011001	10000	5	111	0.002	0.004	0	0.004	0.001	0	0	0	0.01	0	0.006	279.442	0.875
2011001	10000	5	112	0.003	0.004	0	0.003	0.001	0	0	0	0.01	0	0.006	279.351	0.872
2011001	10000	6	1	0	0.002	0	0.002	0.001	0	0	0	0.005	0	0.003	292.357	0.833
2011001	10000	6	2	0	0.002	0	0.002	0.001	0	0	0	0.005	0	0.003	292.175	0.831
2011001	10000	6	3	0	0.003	0	0.002	0.001	0	0	0	0.004	0	0.003	291.976	0.828
2011001	10000	6	4	0	0.003	0	0.002	0.001	0	0	0	0.004	0	0.003	291.821	0.828
2011001	10000	6	5	0	0.003	0	0.002	0.001	0	0	0	0.004	0	0.003	291.625	0.827
2011001	10000	6	6	0	0.003	0	0.002	0.001	0	0	0	0.004	0	0.003	291.501	0.825
2011001	10000	6	7	0	0.003	0	0.002	0.001	0	0	0	0.004	0	0.003	291.301	0.828
2011001	10000	6	8	0	0.003	0	0.002	0.001	0	0	0	0.004	0	0.003	291.179	0.825
2011001	10000	6	9	0	0.003	0	0.002	0.001	0	0	0	0.004	0	0.003	291.021	0.828
2011001	10000	6	10	0	0.003	0	0.002	0.001	0	0	0	0.004	0	0.004	290.89	0.828
2011001	10000	6	11	0	0.003	0.001	0.002	0.001	0	0	0	0.005	0	0.004	290.763	0.829
2011001	10000	6	12	0	0.004	0.001	0.002	0.001	0	0	0	0.005	0	0.004	290.613	0.83
2011001	10000	6	13	0	0.004	0.001	0.002	0.001	0	0	0	0.005	0	0.004	290.523	0.83
2011001	10000	6	14	0	0.004	0.001	0.002	0.001	0	0	0	0.005	0	0.004	290.41	0.83
2011001	10000	6	15	0	0.004	0.001	0.002	0.001	0	0	0	0.005	0	0.004	290.289	0.832
2011001	10000	6	16	0	0.004	0.001	0.002	0.001	0	0	0	0.005	0	0.004	290.097	0.838
2011001	10000	6	17	0	0.005	0.001	0.002	0.001	0	0	0	0.005	0	0.004	289.945	0.842
2011001	10000	6	18	0	0.005	0.001	0.002	0.001	0	0	0	0.005	0	0.004	289.797	0.846
2011001	10000	6	19	0	0.004	0.001	0.002	0.001	0	0	0	0.005	0	0.004	289.624	0.85
2011001	10000	6	20	0	0.004	0.001	0.002	0.001	0	0	0	0.006	0	0.004	289.484	0.854
2011001	10000	6	21	0	0.004	0.001	0.002	0.001	0	0	0	0.006	0	0.004	289.313	0.856
2011001	10000	6	22	0	0.004	0.001	0.002	0.001	0	0	0	0.006	0	0.004	289.187	0.858
2011001	10000	6	23	0	0.004	0.001	0.003	0.001	0	0	0	0.006	0	0.004	289.04	0.863
2011001	10000	6	24	0	0.004	0.001	0.003	0.001	0	0	0	0.006	0	0.004	288.867	0.867
2011001	10000	6	25	0	0.004	0.001	0.003	0.001	0	0	0	0.006	0	0.004	288.782	0.868
2011001	10000	6	26	0	0.004	0.001	0.003	0.001	0	0	0	0.006	0	0.004	288.655	0.869
2011001	10000	6	27	0	0.004	0.001	0.003	0.001	0	0	0	0.007	0	0.004	288.589	0.871
2011001	10000	6	28	0	0.005	0.001	0.003	0.001	0	0	0	0.007	0	0.005	288.469	0.872
2011001	10000	6	29	0	0.005	0.001	0.004	0.001	0	0	0	0.007	0	0.005	288.38	0.874
2011001	10000	6	30	0	0.005	0.001	0.004	0.001	0	0	0	0.008	0	0.005	288.312	0.877
2011001	10000	6	31	0	0.005	0	0.004	0.001	0	0	0	0.008	0	0.005	288.177	0.884
2011001	10000	6	32	0	0.005	0	0.004	0.001	0	0.001	0	0.008	0	0.005	288.097	0.89
2011001	10000	6	33	0	0.005	0	0.004	0.001	0	0.001	0	0.008	0	0.005	288.035	0.892
2011001	10000	6	34	0	0.005	0	0.004	0.002	0	0.001	0	0.008	0	0.005	287.994	0.891
2011001	10000	6	35	0	0.005	0	0.004	0.002	0	0.001	0	0.008	0	0.005	287.934	0.892
2011001	10000	6	36	0	0.006	0	0.004	0.002	0	0.001	0.001	0.009	0	0.005	287.883	0.889
2011001	10000	6	37	0	0.006	0	0.005	0.002	0	0.001	0.001	0.009	0	0.006	287.844	0.889
2011001	10000	6	38	0	0.007	0	0.005	0.002	0	0.001	0.001	0.009	0	0.006	287.764	0.889
2011001	10000	6	39	0	0.007	0	0.005	0.002	0	0.001	0.001	0.009	0.001	0.006	287.696	0.891
2011001	10000	6	40	0	0.008	0	0.005	0.002	0	0.001	0.001	0.009	0.001	0.006	287.67	0.891
2011001	10000	6	41	0	0.008	0	0.005	0.002	0	0.001	0.001	0.009	0.001	0.006	287.518	0.895
2011001	10000	6	42	0	0.008	0	0.005	0.002	0	0.001	0.001	0.01	0.001	0.006	287.383	0.899
2011001	10000	6	43	0.001	0.008	0	0.005	0.002	0	0.001	0.001	0.01	0.001	0.006	287.275	0.9
2011001	10000	6	44	0.001	0.008	0	0.005	0.002	0	0.001	0.001	0.01	0.001	0.006	287.179	0.901
2011001	10000	6	45	0.002	0.008	0	0.005	0.002	0	0.001	0.001	0.01	0.001	0.006	287.064	0.903
2011001	10000	6	46	0.001	0.008	0.001	0.005	0.002	0	0.001	0	0.009	0.001	0.006	286.912	0.903
2011001	10000	6	47	0	0.007	0	0.005	0.002	0	0.001	0	0.009	0.001	0.006	286.745	0.909
2011001	10000	6	48	0.001	0.008	0	0.005	0.002	0	0.001	0.001	0.009	0.001	0.006	286.626	0.908
2011001	10000	6	49	0.001	0.008	0	0.005	0.002	0	0.001	0.001	0.009	0.001	0.006	286.443	0.909
2011001	10000	6	50	0.001	0.008	0	0.005	0.002	0	0.001	0.001	0.009	0.001	0.006	286.346	0.908
2011001	10000	6	51	0.001	0.009	0	0.005	0.002	0	0.001	0	0.009	0.001	0.006	286.147	0.909
2011001	10000	6	52	0.002	0.008	0	0.005	0.002	0	0.001	0	0.009	0.001	0.006	285.962	0.91
2011001	10000	6	53	0.001	0.007	0.001	0.005	0.002	0	0.001	0	0.008	0.001	0.006	285.852	0.911
2011001	10000	6	54	0.001	0.007	0	0.005	0.002	0	0.001	0	0.008	0.001	0.006	285.623	0.914
2011001	10000	6	55	0.001	0.007	0	0.004	0.002	0	0.001	0	0.008	0.001	0.006	285.492	0.914
2011001	10000	6	56	0.001	0.007	0	0.004	0.002	0	0.001	0	0.008	0.001	0.006	285.389	0.912
2011001	10000	6	57	0	0.006	0	0.004	0.002	0	0.001	0	0.008	0.001	0.006	285.255	0.912
2011001	10000	6	58	0	0.005	0	0.004	0.002	0	0.001	0	0.008	0.001	0.005	285.096	0.914
2011001	10000	6	59	0	0.005	0	0.004	0.002	0	0.001	0	0.008	0	0.005	284.925	0.916
2011001	10000	6	60	0	0.004	0	0.004	0.001	0	0.001	0	0.008	0	0.005	284.828	0.916
2011001	10000	6	61	0	0.004	0	0.004	0.001	0	0	0	0.008	0	0.005	284.768	0.917
2011001	10000	6	62	0	0.004	0	0.004	0.001	0	0	0	0.008	0	0.005	284.618	0.918
2011001	10000	6	63	0.001	0.004	0	0.004	0.001	0	0	0	0.008	0	0.004	284.556	0.919
2011001	10000	6	64	0.001	0.004	0	0.003	0.001	0	0	0	0.008	0	0.004	284.443	0.922
2011001	10000	6	65	0	0.004	0	0.003	0.001	0	0	0	0.008	0	0.004	284.313	0.922
2011001	10000	6	66	0	0.004	0	0.003	0.001	0	0	0	0.007	0	0.004	284.236	0.922
2011001	10000	6	67	0	0.004	0	0.003	0.001	0	0	0	0.008	0	0.005	284.119	0.922
2011001	10000	6	68	0	0.004	0	0.003	0.001	0	0	0	0.008	0	0.005	283.986	0.921
2011001	10000	6	69	0	0.004	0	0.003	0.001	0	0	0	0.008	0	0.005	283.875	0.922
2011001	10000	6	70	0	0.004	0	0.003	0.001	0	0	0	0.008	0	0.005	283.691	0.921
2011001	10000	6	71	0	0.004	0	0.002	0.001	0	0	0	0.008	0	0.005	283.529	0.919
2011001	10000	6	72	0	0.004	0	0.002	0.001	0	0	0	0.008	0	0.006	283.41	0.919
2011001	10000	6	73	0	0.004	0	0.002	0.001	0	0	0	0.009	0	0.006	283.305	0.917
2011001	10000	6	74	0	0.005	0	0.003	0.001	0	0	0	0.009	0	0.006	283.229	0.915
2011001	10000	6	75	0	0.005	0	0.003	0.001	0	0	0	0.009	0	0.006	283.173	0.916
2011001	10000	6	76	0	0.005	0	0.003	0.001	0	0	0	0.009	0	0.006	283.033	0.918
2011001	10000	6	77	0	0.005	0	0.003	0.001	0	0	0	0.01	0	0.006	282.986	0.917
2011001	10000	6	78	0	0.005	0	0.003	0.001	0	0	0	0.01	0	0.007	282.935	0.917
2011001	10000	6	79	0.001	0.005	0	0.003	0.001	0	0	0	0.01	0	0.007	282.842	0.917
2011001	10000	6	80	0.001	0.005	0	0.003	0.001	0	0	0	0.01	0	0.007	282.803	0.917
2011001	10000	6	81	0	0.005	0	0.003	0.001	0	0	0	0.01	0	0.007	282.697	0.917
2011001	10000	6	82	0	0.005	0	0.003	0.001	0	0	0	0.01	0	0.007	282.52	0.918
2011001	10000	6	83	0.001	0.005	0	0.003	0.001	0	0	0	0.01	0	0.007	282.464	0.918
2011001	10000	6	84	0.001	0.004	0	0.003	0.001	0	0	0	0.01	0	0.007	282.375	0.918
2011001	10000	6	85	0.001	0.004	0	0.003	0.001	0	0	0	0.01	0	0.007	282.268	0.916
2011001	10000	6	86	0.001	0.004	0	0.003	0.001	0	0	0	0.01	0	0.007	282.202	0.914
2011001	10000	6	87	0.001	0.004	0	0.004	0.001	0	0	0	0.01	0	0.007	282.1	0.914
2011001	10000	6	88	0.001	0.004	0	0.004	0.001	0	0	0	0.01	0	0.007	282.013	0.916
2011001	10000	6	89	0.001	0.004	0	0.004	0.001	0	0	0	0.01	0	0.007	281.962	0.914
2011001	10000	6	90	0.001	0.004	0	0.004	0.001	0	0	0	0.01	0	0.006	281.816	0.916
2011001	10000	6	91	0.001	0.004	0	0.004	0.001	0	0	0	0.01	0	0.006	281.656	0.918
2011001	10000	6	92	0	0.004	0	0.004	0.001	0	0	0	0.01	0	0.006	281.569	0.918
2011001	10000	6	93	0.001	0.004	0	0.004	0.001	0	0	0	0.01	0	0.006	281.453	0.919
2011001	10000	6	94	0.001	0.004	0	0.004	0.001	0	0	0	0.01	0	0.006	281.33	0.92
2011001	10000	6	95	0.001	0.004	0	0.004	0.001	0	0	0	0.01	0	0.006	281.215	0.921
2011001	10000	6	96	0.001	0.004	0	0.004	0.001	0	0	0	0.01	0	0.006	281.025	0.92
2011001	10000	6	97	0.001	0.004	0	0.004	0.001	0	0	0	0.01	0	0.006	280.974	0.917
2011001	10000	6	98	0.002	0.004	0	0.004	0.001	0	0.001	0	0.01	0	0.006	280.83	0.913
2011001	10000	6	99	0.003	0.005	0	0.004	0.001	0	0.001	0	0.011	0	0.006	280.69	0.909
2011001	10000	6	100	0.002	0.005	0	0.004	0.001	0	0.001	0	0.011	0	0.006	280.569	0.908
2011001	10000	6	101	0.001	0.004	0	0.004	0.001	0	0.001	0	0.01	0	0.006	280.421	0.904
2011001	10000	6	102	0.001	0.004	0	0.004	0.001	0	0.001	0	0.011	0	0.006	280.313	0.899
2011001	10000	6	103	0.001	0.004	0	0.004	0.001	0	0.001	0	0.011	0	0.006	280.225	0.896
2011001	10000	6	104	0.001	0.004	0	0.004	0.001	0	0	0	0.01	0	0.006	280.118	0.891
2011001	10000	6	105	0.001	0.004	0	0.004	0.001	0	0	0	0.01	0	0.006	279.993	0.888
2011001	10000	6	106	0.001	0.004	0	0.004	0.001	0	0	0	0.01	0	0.006	279.922	0.885
2011001	10000	6	107	0.001	0.004	0	0.004	0.001	0	0	0	0.011	0	0.006	279.829	0.883
2011001	10000	6	108	0.001	0.004	0	0.004	0.001	0	0	0	0.011	0	0.006	279.747	0.881
2011001	10000	6	109	0.001	0.004	0	0.004	0.001	0	0	0	0.011	0	0.006	279.655	0.879
2011001	10000	6	110	0.001	0.004	0	0.004	0.001	0	0	0	0.01	0	0.006	279.548	0.874
2011001	10000	6	111	0.002	0.003	0	0.004	0.001	0	0	0	0.01	0	0.006	279.444	0.871
2011001	10000	6	112	0.003	0.003	0	0.004	0.001	0	0	0	0.009	0	0.005	279.427	0.868
2011001	10000	7	1	0	0.002	0	0.002	0.001	0	0	0	0.005	0	0.003	292.268	0.831
2011001	10000	7	2	0	0.002	0	0.002	0.001	0	0	0	0.005	0	0.003	292.07	0.829
2011001	10000	7	3	0	0.002	0	0.002	0.001	0	0	0	0.004	0	0.003	291.88	0.829
2011001	10000	7	4	0	0.002	0	0.002	0.001	0	0	0	0.004	0	0.003	291.649	0.831
2011001	10000	7	5	0	0.003	0	0.002	0.001	0	0	0	0.004	0	0.003	291.501	0.83
2011001	10000	7	6	0	0.003	0	0.002	0.001	0	0	0	0.004	0	0.003	291.355	0.829
2011001	10000	7	7	0	0.003	0	0.002	0.001	0	0	0	0.004	0	0.003	291.209	0.829
2011001	10000	7	8	0	0.003	0	0.002	0.001	0	0	0	0.004	0	0.003	291.054	0.829
2011001	10000	7	9	0	0.003	0	0.002	0.001	0	0	0	0.004	0	0.003	290.894	0.829
2011001	10000	7	10	0	0.003	0.001	0.002	0.001	0	0	0	0.004	0	0.003	290.805	0.829
2011001	10000	7	11	0	0.003	0.001	0.002	0.001	0	0	0	0.004	0	0.004	290.665	0.831
2011001	10000	7	12	0	0.004	0.001	0.002	0.001	0	0	0	0.005	0	0.004	290.549	0.831
2011001	10000	7	13	0	0.004	0.001	0.002	0.001	0	0	0	0.005	0	0.004	290.424	0.832
2011001	10000	7	14	0	0.004	0.001	0.002	0.001	0	0	0	0.005	0	0.004	290.305	0.831
2011001	10000	7	15	0	0.004	0.001	0.002	0.001	0	0	0	0.005	0	0.004	290.186	0.833
2011001	10000	7	16	0	0.004	0.001	0.002	0.001	0	0	0	0.005	0	0.004	289.983	0.84
2011001	10000	7	17	0	0.004	0.001	0.002	0.001	0	0	0	0.005	0	0.004	289.873	0.843
2011001	10000	7	18	0	0.004	0.001	0.002	0.001	0	0	0	0.005	0	0.004	289.651	0.851
2011001	10000	7	19	0	0.004	0.001	0.002	0.001	0	0	0	0.005	0	0.004	289.522	0.854
2011001	10000	7	20	0	0.004	0.001	0.002	0.001	0	0	0	0.005	0	0.004	289.326	0.861
2011001	10000	7	21	0	0.004	0.001	0.002	0.001	0	0	0	0.006	0	0.004	289.226	0.861
2011001	10000	7	22	0	0.004	0.001	0.002	0.001	0	0	0	0.006	0	0.004	289.053	0.864
2011001	10000	7	23	0	0.004	0.001	0.002	0.001	0	0	0	0.006	0	0.004	288.907	0.867
2011001	10000	7	24	0	0.004	0.001	0.003	0.001	0	0	0	0.006	0	0.004	288.797	0.869
2011001	10000	7	25	0	0.004	0.001	0.003	0.001	0	0	0	0.006	0	0.004	288.622	0.874
2011001	10000	7	26	0	0.004	0.001	0.003	0.001	0	0	0	0.006	0	0.004	288.518	0.874
2011001	10000	7	27	0	0.004	0.001	0.003	0.001	0	0	0	0.007	0	0.004	288.425	0.877
2011001	10000	7	28	0	0.004	0.001	0.003	0.001	0	0	0	0.007	0	0.005	288.336	0.878
2011001	10000	7	29	0	0.004	0.001	0.004	0.001	0	0	0	0.007	0	0.005	288.262	0.881
2011001	10000	7	30	0	0.004	0	0.004	0.001	0	0	0	0.007	0	0.005	288.14	0.885
2011001	10000	7	31	0	0.004	0	0.004	0.001	0	0.001	0	0.007	0	0.005	288.08	0.889
2011001	10000	7	32	0	0.004	0	0.004	0.001	0	0.001	0	0.008	0	0.005	288.004	0.891
2011001	10000	7	33	0	0.004	0	0.004	0.002	0	0.001	0	0.008	0	0.005	287.931	0.892
2011001	10000	7	34	0	0.005	0	0.004	0.002	0	0.001	0	0.008	0	0.005	287.9	0.892
2011001	10000	7	35	0	0.005	0	0.005	0.002	0	0.001	0.001	0.008	0	0.005	287.819	0.893
2011001	10000	7	36	0	0.006	0	0.005	0.002	0	0.001	0.001	0.009	0.001	0.005	287.813	0.889
2011001	10000	7	37	0	0.006	0	0.005	0.002	0	0.001	0.001	0.009	0.001	0.006	287.741	0.89
2011001	10000	7	38	0	0.006	0	0.005	0.002	0	0.001	0.001	0.009	0.001	0.006	287.67	0.893
2011001	10000	7	39	0	0.008	0.001	0.005	0.002	0	0.001	0.001	0.009	0.001	0.006	287.665	0.892
2011001	10000	7	40	0	0.009	0.001	0.005	0.002	0	0.001	0.001	0.01	0.001	0.006	287.605	0.892
2011001	10000	7	41	0	0.01	0.001	0.005	0.002	0	0.001	0.001	0.01	0.001	0.006	287.508	0.896
2011001	10000	7	42	0.001	0.01	0.001	0.005	0.002	0	0.001	0.001	0.01	0.001	0.006	287.386	0.897
2011001	10000	7	43	0.001	0.009	0.001	0.005	0.002	0	0.001	0.001	0.01	0.001	0.006	287.236	0.9
2011001	10000	7	44	0.001	0.008	0.001	0.005	0.002	0	0.001	0.001	0.01	0.001	0.006	287.167	0.9
2011001	10000	7	45	0.002	0.008	0.001	0.005	0.002	0	0.001	0.001	0.01	0.001	0.006	286.97	0.904
2011001	10000	7	46	0.001	0.007	0.001	0.005	0.002	0	0.001	0.001	0.009	0.001	0.006	286.875	0.904
2011001	10000	7	47	0.001	0.008	0.001	0.005	0.002	0	0.001	0.001	0.009	0.001	0.006	286.701	0.907
2011001	10000	7	48	0.001	0.008	0.001	0.005	0.002	0	0.001	0.001	0.009	0.001	0.006	286.508	0.911
2011001	10000	7	49	0.001	0.009	0.001	0.005	0.002	0	0.001	0.001	0.009	0.001	0.006	286.424	0.91
2011001	10000	7	50	0.001	0.009	0.001	0.005	0.002	0	0.001	0.001	0.009	0.001	0.006	286.232	0.91
2011001	10000	7	51	0.001	0.009	0.001	0.005	0.002	0	0.001	0.001	0.009	0.001	0.006	286.048	0.911
2011001	10000	7	52	0.002	0.008	0.001	0.005	0.002	0	0.001	0.001	0.009	0.001	0.006	285.966	0.911
2011001	10000	7	53	0.001	0.008	0.001	0.005	0.002	0	0.001	0.001	0.008	0.001	0.005	285.741	0.914
2011001	10000	7	54	0.001	0.008	0.001	0.005	0.002	0	0.001	0.001	0.008	0.001	0.006	285.577	0.914
2011001	10000	7	55	0.001	0.009	0.001	0.005	0.002	0	0.001	0.001	0.008	0.001	0.006	285.429	0.913
2011001	10000	7	56	0.001	0.008	0	0.005	0.002	0	0.001	0	0.008	0.001	0.006	285.205	0.913
2011001	10000	7	57	0.001	0.007	0	0.005	0.002	0	0.001	0	0.008	0.001	0.006	285.145	0.912
2011001	10000	7	58	0.001	0.006	0	0.005	0.002	0	0.001	0	0.008	0.001	0.006	284.966	0.913
2011001	10000	7	59	0	0.005	0	0.004	0.002	0	0.001	0	0.008	0	0.005	284.869	0.915
2011001	10000	7	60	0	0.005	0	0.004	0.002	0	0.001	0	0.008	0	0.005	284.746	0.916
2011001	10000	7	61	0	0.004	0	0.004	0.001	0	0.001	0	0.008	0	0.005	284.601	0.918
2011001	10000	7	62	0.001	0.005	0	0.004	0.001	0	0	0	0.008	0	0.005	284.586	0.918
2011001	10000	7	63	0.001	0.005	0	0.004	0.001	0	0	0	0.008	0	0.004	284.463	0.92
2011001	10000	7	64	0	0.004	0	0.004	0.001	0	0	0	0.007	0	0.004	284.349	0.922
2011001	10000	7	65	0	0.004	0	0.003	0.001	0	0	0	0.007	0	0.004	284.277	0.92
2011001	10000	7	66	0	0.004	0	0.003	0.001	0	0	0	0.007	0	0.004	284.142	0.922
2011001	10000	7	67	0	0.003	0	0.003	0.001	0	0	0	0.007	0	0.004	284.002	0.922
2011001	10000	7	68	0	0.004	0	0.003	0.001	0	0	0	0.007	0	0.004	283.939	0.92
2011001	10000	7	69	0	0.004	0	0.003	0.001	0	0	0	0.007	0	0.005	283.7	0.921
2011001	10000	7	70	0	0.004	0	0.003	0.001	0	0	0	0.007	0	0.005	283.61	0.922
2011001	10000	7	71	0	0.004	0	0.003	0.001	0	0	0	0.008	0	0.005	283.457	0.92
2011001	10000	7	72	0	0.004	0	0.003	0.001	0	0	0	0.008	0	0.005	283.293	0.918
2011001	10000	7	73	0	0.004	0	0.003	0.001	0	0	0	0.008	0	0.006	283.247	0.916
2011001	10000	7	74	0	0.004	0	0.003	0.001	0	0	0	0.009	0	0.006	283.184	0.912
2011001	10000	7	75	0	0.004	0	0.003	0.001	0	0	0	0.009	0	0.006	283.072	0.912
2011001	10000	7	76	0	0.005	0	0.003	0.001	0	0	0	0.009	0	0.006	282.986	0.914
2011001	10000	7	77	0	0.005	0	0.003	0.001	0	0	0	0.009	0	0.006	282.936	0.914
2011001	10000	7	78	0	0.005	0	0.003	0.001	0	0	0	0.009	0	0.006	282.834	0.915
2011001	10000	7	79	0	0.005	0	0.003	0.001	0	0	0	0.009	0	0.006	282.781	0.914
2011001	10000	7	80	0	0.005	0	0.003	0.001	0	0	0	0.009	0	0.006	282.668	0.918
2011001	10000	7	81	0	0.005	0	0.003	0.001	0	0	0	0.01	0	0.007	282.552	0.92
2011001	10000	7	82	0	0.005	0	0.003	0.001	0	0	0	0.01	0	0.007	282.5	0.92
2011001	10000	7	83	0	0.004	0	0.003	0.001	0	0	0	0.01	0	0.007	282.357	0.919
2011001	10000	7	84	0	0.004	0	0.004	0.001	0	0	0	0.01	0	0.007	282.263	0.919
2011001	10000	7	85	0	0.004	0	0.004	0.001	0	0	0	0.01	0	0.007	282.197	0.919
2011001	10000	7	86	0.001	0.004	0	0.004	0.001	0	0	0	0.01	0	0.006	282.091	0.919
2011001	10000	7	87	0.001	0.004	0	0.004	0.001	0	0	0	0.01	0	0.006	282.015	0.918
2011001	10000	7	88	0.001	0.004	0	0.004	0.001	0	0	0	0.01	0	0.006	281.968	0.915
2011001	10000	7	89	0	0.004	0	0.004	0.001	0	0	0	0.01	0	0.006	281.851	0.916
2011001	10000	7	90	0	0.003	0	0.004	0.001	0	0	0	0.009	0	0.006	281.76	0.917
2011001	10000	7	91	0	0.003	0	0.004	0.001	0	0	0	0.009	0	0.006	281.663	0.918
2011001	10000	7	92	0	0.003	0	0.004	0.001	0	0	0	0.009	0	0.006	281.518	0.922
2011001	10000	7	93	0.001	0.003	0	0.004	0.001	0	0	0	0.009	0	0.006	281.424	0.923
2011001	10000	7	94	0.001	0.003	0	0.004	0.001	0	0	0	0.009	0	0.006	281.297	0.927
2011001	10000	7	95	0.001	0.003	0	0.004	0.001	0	0	0	0.009	0	0.006	281.125	0.923
2011001	10000	7	96	0.001	0.004	0	0.004	0.001	0	0.001	0	0.01	0	0.006	281.041	0.922
2011001	10000	7	97	0.001	0.004	0	0.004	0.001	0	0.001	0	0.01	0	0.006	280.951	0.917
2011001	10000	7	98	0.003	0.004	0	0.004	0.001	0	0.001	0	0.01	0	0.006	280.773	0.912
2011001	10000	7	99	0.002	0.004	0	0.004	0.001	0	0.001	0	0.011	0	0.006	280.669	0.908
2011001	10000	7	100	0.001	0.004	0	0.005	0.001	0	0.001	0	0.01	0	0.006	280.515	0.904
2011001	10000	7	101	0.001	0.004	0	0.004	0.001	0	0.001	0	0.01	0	0.005	280.41	0.899
2011001	10000	7	102	0.001	0.004	0	0.004	0.001	0	0.001	0	0.01	0	0.005	280.309	0.895
2011001	10000	7	103	0.001	0.004	0	0.004	0.001	0	0.001	0	0.01	0	0.005	280.196	0.892
2011001	10000	7	104	0.001	0.004	0	0.004	0.001	0	0.001	0	0.01	0	0.005	280.109	0.886
2011001	10000	7	105	0.001	0.003	0	0.004	0.001	0	0.001	0	0.01	0	0.005	280.014	0.883
2011001	10000	7	106	0.001	0.003	0	0.004	0.001	0	0.001	0	0.01	0	0.005	279.905	0.88
2011001	10000	7	107	0.001	0.003	0	0.004	0.001	0	0.001	0	0.01	0	0.005	279.808	0.878
2011001	10000	7	108	0.001	0.003	0	0.004	0.001	0	0.001	0	0.01	0	0.005	279.729	0.876
2011001	10000	7	109	0.001	0.003	0	0.004	0.001	0	0.001	0	0.01	0	0.006	279.608	0.873
2011001	10000	7	110	0.001	0.003	0	0.004	0.001	0	0.001	0	0.01	0	0.006	279.582	0.87
2011001	10000	7	111	0.002	0.003	0	0.004	0.001	0	0.001	0	0.01	0	0.005	279.581	0.869
2011001	10000	7	112	0.003	0.002	0	0.004	0.001	0	0	0	0.009	0	0.005	279.569	0.866
2011001	10000	8	1	0	0.002	0	0.002	0.001	0	0	0	0.005	0	0.003	292.123	0.835
2011001	10000	8	2	0	0.002	0	0.002	0.001	0	0	0	0.005	0	0.003	291.936	0.833
2011001	10000	8	3	0	0.002	0	0.002	0.001	0	0	0	0.004	0	0.003	291.73	0.831
2011001	10000	8	4	0	0.003	0	0.002	0.001	0	0	0	0.004	0	0.003	291.574	0.831
2011001	10000	8	5	0	0.003	0	0.002	0.001	0	0	0	0.004	0	0.003	291.418	0.83
2011001	10000	8	6	0	0.003	0	0.002	0.001	0	0	0	0.004	0	0.003	291.261	0.83
2011001	10000	8	7	0	0.003	0	0.002	0.001	0	0	0	0.004	0	0.003	291.1	0.83
2011001	10000	8	8	0	0.003	0	0.002	0.001	0	0	0	0.004	0	0.003	290.965	0.829
2011001	10000	8	9	0	0.003	0	0.002	0.001	0	0	0	0.004	0	0.003	290.83	0.831
2011001	10000	8	10	0	0.003	0	0.002	0.001	0	0	0	0.004	0	0.003	290.681	0.832
2011001	10000	8	11	0	0.003	0.001	0.002	0.001	0	0	0	0.004	0	0.003	290.578	0.832
2011001	10000	8	12	0	0.003	0.001	0.002	0.001	0	0	0	0.004	0	0.004	290.419	0.834
2011001	10000	8	13	0	0.004	0.001	0.002	0.001	0	0	0	0.004	0	0.004	290.318	0.835
2011001	10000	8	14	0	0.004	0.001	0.002	0.001	0	0	0	0.005	0	0.004	290.199	0.834
2011001	10000	8	15	0	0.004	0.001	0.002	0.001	0	0	0	0.005	0	0.004	290.036	0.837
2011001	10000	8	16	0	0.004	0.001	0.002	0.001	0	0	0	0.005	0	0.004	289.886	0.844
2011001	10000	8	17	0	0.004	0.001	0.002	0.001	0	0	0	0.005	0	0.004	289.693	0.851
2011001	10000	8	18	0	0.004	0.001	0.002	0.001	0	0	0	0.005	0	0.004	289.555	0.855
2011001	10000	8	19	0	0.004	0	0.002	0.001	0	0	0	0.005	0	0.004	289.326	0.863
2011001	10000	8	20	0	0.004	0.001	0.002	0.001	0	0	0	0.005	0	0.004	289.19	0.866
2011001	10000	8	21	0	0.004	0.001	0.002	0.001	0	0	0	0.005	0	0.004	289.059	0.869
2011001	10000	8	22	0	0.004	0.001	0.002	0.001	0	0	0	0.006	0	0.004	288.903	0.873
2011001	10000	8	23	0	0.004	0.001	0.002	0.001	0	0	0	0.006	0	0.004	288.81	0.872
2011001	10000	8	24	0	0.004	0.001	0.003	0.001	0	0	0	0.006	0	0.004	288.687	0.872
2011001	10000	8	25	0	0.004	0.001	0.003	0.001	0	0	0	0.006	0	0.004	288.565	0.874
2011001	10000	8	26	0	0.004	0.001	0.003	0.001	0	0	0	0.006	0	0.004	288.472	0.873
2011001	10000	8	27	0	0.004	0.001	0.003	0.001	0	0	0	0.007	0	0.005	288.356	0.875
2011001	10000	8	28	0	0.004	0.001	0.003	0.001	0	0	0	0.007	0	0.005	288.236	0.883
2011001	10000	8	29	0	0.004	0	0.004	0.001	0	0	0	0.007	0	0.005	288.127	0.884
2011001	10000	8	30	0	0.004	0	0.004	0.001	0	0	0	0.007	0	0.005	288.047	0.889
2011001	10000	8	31	0	0.004	0	0.004	0.001	0	0.001	0	0.007	0	0.005	287.916	0.893
2011001	10000	8	32	0	0.004	0	0.004	0.001	0	0.001	0	0.008	0	0.005	287.854	0.896
2011001	10000	8	33	0	0.004	0	0.004	0.002	0	0.001	0	0.008	0	0.005	287.828	0.895
2011001	10000	8	34	0	0.005	0	0.005	0.002	0	0.001	0.001	0.008	0.001	0.005	287.801	0.893
2011001	10000	8	35	0	0.005	0	0.005	0.002	0	0.001	0.001	0.008	0.001	0.005	287.745	0.894
2011001	10000	8	36	0	0.006	0	0.005	0.002	0	0.001	0.001	0.009	0.001	0.005	287.702	0.892
2011001	10000	8	37	0	0.006	0	0.005	0.002	0	0.001	0.001	0.009	0.001	0.006	287.653	0.894
2011001	10000	8	38	0	0.006	0.001	0.005	0.002	0	0.001	0.001	0.009	0.001	0.006	287.601	0.899
2011001	10000	8	39	0	0.008	0.001	0.005	0.002	0	0.001	0.001	0.009	0.001	0.006	287.575	0.896
2011001	10000	8	40	0	0.01	0.001	0.005	0.002	0	0.001	0.001	0.009	0.001	0.006	287.543	0.897
2011001	10000	8	41	0.001	0.011	0.001	0.005	0.002	0	0.001	0.001	0.009	0.001	0.006	287.482	0.896
2011001	10000	8	42	0.001	0.01	0.001	0.005	0.002	0	0.001	0.001	0.009	0.001	0.006	287.339	0.897
2011001	10000	8	43	0.001	0.009	0.001	0.005	0.002	0	0.001	0.001	0.009	0.001	0.006	287.211	0.901
2011001	10000	8	44	0.001	0.008	0.001	0.005	0.002	0	0.001	0.001	0.009	0.001	0.005	287.043	0.901
2011001	10000	8	45	0.002	0.008	0.001	0.005	0.002	0	0.001	0.001	0.009	0.001	0.006	286.951	0.901
2011001	10000	8	46	0.001	0.008	0.001	0.005	0.002	0	0.001	0.001	0.009	0.001	0.006	286.772	0.902
2011001	10000	8	47	0.001	0.008	0.001	0.005	0.002	0	0.001	0.001	0.009	0.001	0.006	286.6	0.906
2011001	10000	8	48	0.001	0.008	0.001	0.005	0.002	0	0.001	0.001	0.009	0.001	0.006	286.473	0.908
2011001	10000	8	49	0.001	0.009	0.001	0.005	0.002	0	0.001	0.001	0.009	0.001	0.006	286.261	0.912
2011001	10000	8	50	0.001	0.009	0.001	0.005	0.002	0	0.001	0.001	0.009	0.001	0.006	286.151	0.911
2011001	10000	8	51	0.002	0.009	0.001	0.005	0.002	0	0.001	0.001	0.009	0.001	0.006	286.02	0.913
2011001	10000	8	52	0.001	0.008	0.001	0.005	0.002	0	0.001	0.001	0.008	0.001	0.005	285.743	0.916
2011001	10000	8	53	0.001	0.008	0.001	0.005	0.002	0	0.001	0.001	0.008	0.001	0.005	285.622	0.918
2011001	10000	8	54	0.001	0.009	0.001	0.005	0.002	0	0.001	0.001	0.008	0.001	0.006	285.485	0.916
2011001	10000	8	55	0.001	0.01	0.001	0.005	0.002	0	0.001	0.001	0.008	0.002	0.006	285.249	0.916
2011001	10000	8	56	0.001	0.01	0.001	0.005	0.001	0	0.001	0.001	0.008	0.001	0.006	285.166	0.914
2011001	10000	8	57	0.001	0.009	0	0.005	0.001	0	0.001	0	0.008	0.001	0.006	284.965	0.914
2011001	10000	8	58	0.001	0.008	0	0.005	0.002	0	0.001	0	0.008	0.001	0.006	284.822	0.913
2011001	10000	8	59	0.001	0.006	0	0.004	0.002	0	0.001	0	0.008	0.001	0.005	284.777	0.912
2011001	10000	8	60	0.001	0.005	0	0.004	0.001	0	0.001	0	0.007	0	0.004	284.638	0.913
2011001	10000	8	61	0.001	0.005	0	0.004	0.001	0	0.001	0	0.007	0	0.004	284.564	0.915
2011001	10000	8	62	0.001	0.005	0	0.004	0.001	0	0.001	0	0.007	0	0.004	284.454	0.917
2011001	10000	8	63	0.001	0.004	0	0.004	0.001	0	0	0	0.007	0	0.004	284.382	0.918
2011001	10000	8	64	0	0.004	0	0.004	0.001	0	0	0	0.007	0	0.004	284.297	0.92
2011001	10000	8	65	0	0.003	0	0.004	0.001	0	0	0	0.007	0	0.004	284.164	0.922
2011001	10000	8	66	0	0.003	0	0.003	0.001	0	0	0	0.006	0	0.004	284.029	0.924
2011001	10000	8	67	0	0.003	0	0.003	0.001	0	0	0	0.006	0	0.004	283.915	0.923
2011001	10000	8	68	0	0.003	0	0.003	0.001	0	0	0	0.007	0	0.004	283.771	0.922
2011001	10000	8	69	0	0.004	0	0.003	0.001	0	0	0	0.007	0	0.004	283.636	0.924
2011001	10000	8	70	0	0.004	0	0.003	0.001	0	0	0	0.007	0	0.004	283.527	0.921
2011001	10000	8	71	0	0.004	0	0.003	0.001	0	0	0	0.007	0	0.005	283.355	0.919
2011001	10000	8	72	0	0.004	0	0.003	0.001	0	0	0	0.007	0	0.005	283.261	0.916
2011001	10000	8	73	0	0.004	0	0.003	0.001	0	0	0	0.008	0	0.005	283.191	0.913
2011001	10000	8	74	0	0.004	0	0.003	0.001	0	0	0	0.008	0	0.005	283.087	0.911
2011001	10000	8	75	0	0.004	0	0.003	0.001	0	0	0	0.008	0	0.006	283.023	0.911
2011001	10000	8	76	0	0.004	0	0.003	0.001	0	0	0	0.009	0	0.006	282.951	0.911
2011001	10000	8	77	0	0.004	0	0.003	0.001	0	0	0	0.009	0	0.006	282.875	0.91
2011001	10000	8	78	0	0.005	0	0.003	0.001	0	0	0	0.009	0	0.006	282.788	0.914
2011001	10000	8	79	0	0.005	0	0.003	0.001	0	0	0	0.009	0	0.006	282.683	0.915
2011001	10000	8	80	0	0.005	0	0.003	0.001	0	0	0	0.009	0	0.006	282.598	0.914
2011001	10000	8	81	0	0.004	0	0.003	0.001	0	0	0	0.009	0	0.006	282.529	0.917
2011001	10000	8	82	0	0.004	0	0.003	0.001	0	0	0	0.009	0	0.006	282.399	0.918
2011001	10000	8	83	0	0.004	0	0.004	0.001	0	0	0	0.01	0	0.006	282.303	0.919
2011001	10000	8	84	0	0.004	0	0.004	0.001	0	0	0	0.01	0	0.006	282.206	0.92
2011001	10000	8	85	0	0.004	0	0.004	0.001	0	0	0	0.01	0	0.006	282.099	0.919
2011001	10000	8	86	0	0.003	0	0.004	0.001	0	0	0	0.01	0	0.006	282.032	0.92
2011001	10000	8	87	0.001	0.003	0	0.004	0.001	0	0	0	0.01	0	0.006	281.95	0.919
2011001	10000	8	88	0.001	0.003	0	0.004	0.001	0	0	0	0.01	0	0.006	281.865	0.919
2011001	10000	8	89	0	0.003	0	0.004	0.001	0	0	0	0.009	0	0.006	281.807	0.917
2011001	10000	8	90	0	0.003	0	0.004	0.001	0	0	0	0.009	0	0.006	281.728	0.92
2011001	10000	8	91	0	0.003	0	0.004	0.001	0	0	0	0.009	0	0.006	281.575	0.924
2011001	10000	8	92	0	0.003	0	0.004	0.001	0	0	0	0.009	0	0.006	281.49	0.925
2011001	10000	8	93	0.001	0.003	0	0.004	0.001	0	0	0	0.009	0	0.006	281.388	0.926
2011001	10000	8	94	0	0.003	0	0.004	0.001	0	0.001	0	0.009	0	0.006	281.235	0.925
2011001	10000	8	95	0	0.003	0	0.004	0.001	0	0.001	0	0.009	0	0.006	281.121	0.922
2011001	10000	8	96	0.001	0.003	0	0.004	0.001	0	0.001	0	0.01	0	0.006	281.033	0.92
2011001	10000	8	97	0.001	0.004	0	0.004	0.001	0	0.001	0	0.01	0	0.006	280.856	0.915
2011001	10000	8	98	0.004	0.004	0	0.005	0.001	0	0.001	0	0.011	0	0.006	280.76	0.909
2011001	10000	8	99	0.002	0.004	0	0.005	0.001	0	0.001	0	0.011	0	0.006	280.648	0.905
2011001	10000	8	100	0.001	0.004	0	0.005	0.001	0	0.001	0	0.01	0	0.006	280.484	0.899
2011001	10000	8	101	0.002	0.004	0	0.005	0.001	0	0.001	0	0.01	0	0.005	280.4	0.895
2011001	10000	8	102	0.001	0.004	0	0.005	0.001	0	0.001	0	0.01	0	0.005	280.332	0.89
2011001	10000	8	103	0.001	0.003	0	0.005	0.001	0	0.001	0	0.01	0	0.005	280.204	0.886
2011001	10000	8	104	0.001	0.003	0	0.005	0.001	0	0.001	0	0.01	0	0.005	280.106	0.881
2011001	10000	8	105	0.001	0.003	0	0.005	0.001	0	0.001	0	0.01	0	0.005	280.015	0.877
2011001	10000	8	106	0.001	0.003	0	0.005	0.001	0	0.001	0	0.01	0	0.005	279.92	0.873
2011001	10000	8	107	0.001	0.003	0	0.005	0.001	0	0.001	0	0.01	0	0.005	279.81	0.873
2011001	10000	8	108	0.001	0.003	0	0.004	0.001	0	0.001	0	0.01	0	0.005	279.706	0.87
2011001	10000	8	109	0.001	0.003	0	0.005	0.001	0	0.001	0	0.01	0	0.005	279.625	0.868
2011001	10000	8	110	0.001	0.003	0	0.005	0.001	0	0.001	0	0.01	0	0.005	279.593	0.866
2011001	10000	8	111	0.001	0.002	0	0.004	0.001	0	0.001	0	0.01	0	0.005	279.665	0.862
2011001	10000	8	112	0.002	0.002	0	0.004	0.001	0	0.001	0	0.009	0	0.005	279.798	0.861
2011001	10000	9	1	0	0.002	0	0.002	0.001	0	0	0	0.005	0	0.003	292.064	0.833
2011001	10000	9	2	0	0.002	0	0.002	0.001	0	0	0	0.005	0	0.003	291.81	0.834
2011001	10000	9	3	0	0.002	0	0.002	0.001	0	0	0	0.004	0	0.003	291.636	0.835
2011001	10000	9	4	0	0.002	0	0.002	0.001	0	0	0	0.004	0	0.003	291.434	0.835
2011001	10000	9	5	0	0.003	0	0.002	0.001	0	0	0	0.004	0	0.003	291.291	0.831
2011001	10000	9	6	0	0.002	0	0.002	0.001	0	0	0	0.004	0	0.003	291.155	0.831
2011001	10000	9	7	0	0.002	0	0.002	0.001	0	0	0	0.004	0	0.003	291.003	0.832
2011001	10000	9	8	0	0.002	0	0.002	0.001	0	0	0	0.004	0	0.003	290.89	0.831
2011001	10000	9	9	0	0.002	0	0.002	0.001	0	0	0	0.004	0	0.003	290.716	0.832
2011001	10000	9	10	0	0.003	0	0.002	0.001	0	0	0	0.004	0	0.003	290.569	0.834
2011001	10000	9	11	0	0.003	0	0.002	0.001	0	0	0	0.004	0	0.003	290.412	0.839
2011001	10000	9	12	0	0.003	0.001	0.002	0.001	0	0	0	0.004	0	0.003	290.339	0.835
2011001	10000	9	13	0	0.003	0.001	0.002	0.001	0	0	0	0.004	0	0.004	290.184	0.839
2011001	10000	9	14	0	0.004	0.001	0.002	0.001	0	0	0	0.004	0	0.004	290.069	0.837
2011001	10000	9	15	0	0.003	0.001	0.002	0.001	0	0	0	0.004	0	0.004	289.946	0.841
2011001	10000	9	16	0	0.004	0.001	0.002	0.001	0	0	0	0.005	0	0.004	289.778	0.848
2011001	10000	9	17	0	0.004	0.001	0.002	0.001	0	0	0	0.005	0	0.004	289.603	0.854
2011001	10000	9	18	0	0.004	0.001	0.002	0.001	0	0	0	0.005	0	0.004	289.38	0.863
2011001	10000	9	19	0	0.004	0.001	0.002	0.001	0	0	0	0.005	0	0.004	289.211	0.868
2011001	10000	9	20	0	0.004	0.001	0.002	0.001	0	0	0	0.005	0	0.004	289.087	0.87
2011001	10000	9	21	0	0.004	0.001	0.002	0.001	0	0	0	0.005	0	0.004	288.951	0.872
2011001	10000	9	22	0	0.004	0.001	0.002	0.001	0	0	0	0.005	0	0.004	288.799	0.877
2011001	10000	9	23	0	0.004	0.001	0.002	0.001	0	0	0	0.006	0	0.004	288.651	0.877
2011001	10000	9	24	0	0.004	0.001	0.002	0.001	0	0	0	0.006	0	0.004	288.548	0.879
2011001	10000	9	25	0	0.004	0.001	0.003	0.001	0	0	0	0.006	0	0.004	288.423	0.879
2011001	10000	9	26	0	0.004	0.001	0.003	0.001	0	0	0	0.006	0	0.004	288.307	0.881
2011001	10000	9	27	0	0.004	0.001	0.003	0.001	0	0	0	0.007	0	0.004	288.217	0.884
2011001	10000	9	28	0	0.004	0	0.003	0.001	0	0	0	0.007	0	0.005	288.115	0.886
2011001	10000	9	29	0	0.004	0	0.003	0.001	0	0	0	0.007	0	0.005	288.043	0.887
2011001	10000	9	30	0	0.004	0	0.004	0.001	0	0	0	0.007	0	0.005	287.898	0.891
2011001	10000	9	31	0	0.004	0	0.004	0.001	0	0.001	0	0.008	0	0.005	287.792	0.896
2011001	10000	9	32	0	0.004	0	0.004	0.001	0	0.001	0	0.008	0	0.005	287.748	0.897
2011001	10000	9	33	0	0.004	0	0.004	0.002	0	0.001	0	0.008	0	0.005	287.678	0.899
2011001	10000	9	34	0	0.005	0	0.005	0.002	0	0.001	0.001	0.008	0.001	0.005	287.665	0.897
2011001	10000	9	35	0	0.005	0	0.005	0.002	0	0.001	0.001	0.009	0.001	0.005	287.613	0.898
2011001	10000	9	36	0	0.006	0	0.005	0.002	0	0.001	0.001	0.009	0.001	0.005	287.612	0.897
2011001	10000	9	37	0	0.007	0	0.005	0.002	0	0.001	0.001	0.009	0.001	0.006	287.579	0.899
2011001	10000	9	38	0	0.007	0.001	0.005	0.002	0	0.001	0.001	0.009	0.001	0.006	287.515	0.901
2011001	10000	9	39	0	0.009	0.001	0.005	0.002	0	0.001	0.001	0.009	0.001	0.006	287.511	0.901
2011001	10000	9	40	0.001	0.011	0.001	0.005	0.002	0	0.001	0.001	0.009	0.001	0.006	287.484	0.898
2011001	10000	9	41	0.001	0.01	0.001	0.005	0.002	0	0.001	0.001	0.009	0.001	0.006	287.342	0.901
2011001	10000	9	42	0.001	0.008	0.001	0.005	0.002	0	0.001	0.001	0.009	0.001	0.005	287.294	0.898
2011001	10000	9	43	0.001	0.008	0.001	0.005	0.002	0	0.001	0.001	0.009	0.001	0.005	287.065	0.9
2011001	10000	9	44	0.001	0.008	0.001	0.005	0.002	0	0.001	0.001	0.009	0.001	0.005	286.896	0.9
2011001	10000	9	45	0.002	0.008	0.001	0.005	0.002	0	0.001	0.001	0.009	0.001	0.005	286.832	0.898
2011001	10000	9	46	0.001	0.008	0.001	0.005	0.002	0	0.001	0.001	0.008	0.001	0.005	286.665	0.899
2011001	10000	9	47	0.001	0.008	0.001	0.005	0.002	0	0.001	0.001	0.008	0.001	0.005	286.559	0.9
2011001	10000	9	48	0.001	0.009	0.001	0.005	0.002	0	0.001	0.001	0.008	0.001	0.005	286.362	0.902
2011001	10000	9	49	0.001	0.009	0.001	0.005	0.002	0	0.001	0.001	0.008	0.001	0.005	286.224	0.907
2011001	10000	9	50	0.002	0.01	0.001	0.005	0.002	0	0.001	0.001	0.009	0.001	0.006	286.098	0.908
2011001	10000	9	51	0.002	0.009	0.001	0.005	0.002	0	0.001	0.001	0.009	0.001	0.006	285.901	0.911
2011001	10000	9	52	0.001	0.009	0.001	0.005	0.002	0	0.001	0.001	0.008	0.001	0.006	285.721	0.913
2011001	10000	9	53	0.001	0.009	0.001	0.005	0.002	0	0.001	0.001	0.008	0.001	0.006	285.572	0.914
2011001	10000	9	54	0.001	0.011	0.001	0.005	0.002	0	0.001	0.001	0.008	0.002	0.006	285.374	0.914
2011001	10000	9	55	0.001	0.012	0.001	0.005	0.002	0	0.001	0.001	0.008	0.002	0.006	285.292	0.91
2011001	10000	9	56	0.001	0.013	0.001	0.005	0.002	0	0.001	0.001	0.008	0.002	0.006	285.039	0.911
2011001	10000	9	57	0.001	0.011	0.001	0.005	0.001	0	0.001	0.001	0.008	0.001	0.006	284.872	0.913
2011001	10000	9	58	0.001	0.011	0	0.004	0.001	0	0.001	0.001	0.008	0.001	0.006	284.767	0.913
2011001	10000	9	59	0.001	0.009	0	0.004	0.001	0	0.001	0	0.008	0.001	0.005	284.607	0.914
2011001	10000	9	60	0.001	0.006	0	0.004	0.001	0	0.001	0	0.007	0.001	0.005	284.534	0.913
2011001	10000	9	61	0.001	0.005	0	0.004	0.001	0	0.001	0	0.007	0	0.004	284.473	0.914
2011001	10000	9	62	0.002	0.005	0	0.004	0.001	0	0.001	0	0.007	0	0.004	284.405	0.915
2011001	10000	9	63	0.001	0.004	0	0.004	0.001	0	0	0	0.007	0	0.004	284.375	0.916
2011001	10000	9	64	0	0.004	0	0.004	0.001	0	0	0	0.006	0	0.004	284.181	0.92
2011001	10000	9	65	0	0.003	0	0.004	0.001	0	0	0	0.006	0	0.004	284.007	0.921
2011001	10000	9	66	0	0.004	0	0.004	0.001	0	0	0	0.006	0	0.004	283.978	0.922
2011001	10000	9	67	0	0.004	0	0.003	0.001	0	0	0	0.006	0	0.004	283.906	0.921
2011001	10000	9	68	0	0.004	0	0.003	0.001	0	0	0	0.006	0	0.004	283.707	0.923
2011001	10000	9	69	0	0.004	0	0.003	0.001	0	0	0	0.006	0	0.004	283.516	0.925
2011001	10000	9	70	0	0.004	0	0.003	0.001	0	0	0	0.006	0	0.004	283.377	0.923
2011001	10000	9	71	0	0.004	0	0.003	0.001	0	0	0	0.007	0	0.004	283.313	0.92
2011001	10000	9	72	0	0.004	0	0.003	0.001	0	0	0	0.007	0	0.005	283.192	0.917
2011001	10000	9	73	0	0.004	0	0.003	0.001	0	0	0	0.007	0	0.005	283.075	0.915
2011001	10000	9	74	0	0.004	0	0.003	0.001	0	0	0	0.008	0	0.005	283.051	0.911
2011001	10000	9	75	0	0.004	0	0.003	0.001	0	0	0	0.008	0	0.005	282.995	0.906
2011001	10000	9	76	0	0.004	0	0.003	0.001	0	0	0	0.008	0	0.005	282.908	0.908
2011001	10000	9	77	0	0.004	0	0.003	0.001	0	0	0	0.008	0	0.006	282.847	0.908
2011001	10000	9	78	0	0.004	0	0.003	0.001	0	0	0	0.009	0	0.006	282.753	0.909
2011001	10000	9	79	0	0.005	0	0.003	0.001	0	0	0	0.009	0	0.006	282.644	0.91
2011001	10000	9	80	0	0.005	0	0.003	0.001	0	0	0	0.009	0	0.006	282.564	0.913
2011001	10000	9	81	0	0.004	0	0.003	0.001	0	0	0	0.009	0	0.006	282.474	0.915
2011001	10000	9	82	0	0.004	0	0.004	0.001	0	0	0	0.009	0	0.006	282.345	0.917
2011001	10000	9	83	0	0.004	0	0.004	0.001	0	0	0	0.009	0	0.006	282.258	0.918
2011001	10000	9	84	0	0.004	0	0.004	0.001	0	0	0	0.009	0	0.006	282.135	0.919
2011001	10000	9	85	0	0.003	0	0.004	0.001	0	0	0	0.009	0	0.006	282.06	0.919
2011001	10000	9	86	0	0.003	0	0.004	0.001	0	0.001	0	0.009	0	0.006	281.977	0.919
2011001	10000	9	87	0	0.003	0	0.004	0.001	0	0.001	0	0.009	0	0.006	281.865	0.921
2011001	10000	9	88	0.001	0.003	0	0.004	0.001	0	0.001	0	0.009	0	0.006	281.796	0.921
2011001	10000	9	89	0	0.003	0	0.004	0.001	0	0.001	0	0.009	0	0.006	281.685	0.925
2011001	10000	9	90	0	0.003	0	0.004	0.001	0	0	0	0.009	0	0.006	281.6	0.925
2011001	10000	9	91	0	0.003	0	0.004	0.001	0	0	0	0.009	0	0.006	281.528	0.926
2011001	10000	9	92	0	0.003	0	0.004	0.001	0	0	0	0.009	0	0.005	281.433	0.926
2011001	10000	9	93	0	0.003	0	0.004	0.001	0	0.001	0	0.009	0	0.005	281.32	0.925
2011001	10000	9	94	0	0.003	0	0.004	0.001	0	0.001	0	0.009	0	0.005	281.23	0.923
2011001	10000	9	95	0	0.003	0	0.004	0.001	0	0.001	0	0.009	0	0.005	281.028	0.922
2011001	10000	9	96	0.001	0.004	0	0.004	0.001	0	0.001	0	0.009	0	0.005	280.992	0.917
2011001	10000	9	97	0.002	0.004	0	0.005	0.001	0	0.001	0	0.01	0	0.006	280.904	0.912
2011001	10000	9	98	0.003	0.004	0	0.005	0.001	0	0.001	0	0.01	0	0.006	280.732	0.906
2011001	10000	9	99	0.002	0.004	0	0.005	0.001	0	0.001	0	0.01	0	0.006	280.594	0.901
2011001	10000	9	100	0.002	0.004	0	0.005	0.001	0	0.001	0	0.01	0	0.006	280.53	0.897
2011001	10000	9	101	0.001	0.004	0	0.005	0.001	0	0.001	0	0.01	0	0.005	280.392	0.89
2011001	10000	9	102	0.001	0.003	0	0.005	0.001	0	0.001	0	0.01	0	0.005	280.288	0.885
2011001	10000	9	103	0.001	0.003	0	0.005	0.001	0	0.001	0	0.01	0	0.005	280.2	0.882
2011001	10000	9	104	0.001	0.003	0	0.005	0.001	0	0.001	0	0.01	0	0.005	280.094	0.876
2011001	10000	9	105	0.001	0.003	0	0.005	0.002	0	0.001	0	0.01	0	0.005	279.996	0.872
2011001	10000	9	106	0.001	0.003	0	0.005	0.001	0	0.001	0	0.01	0	0.005	279.899	0.87
2011001	10000	9	107	0.001	0.003	0	0.005	0.001	0	0.001	0	0.01	0	0.005	279.805	0.866
2011001	10000	9	108	0.001	0.002	0	0.005	0.001	0	0.001	0	0.01	0	0.005	279.666	0.865
2011001	10000	9	109	0.001	0.002	0	0.005	0.001	0	0.001	0	0.01	0	0.005	279.57	0.863
2011001	10000	9	110	0.001	0.002	0	0.005	0.001	0	0.001	0	0.01	0	0.005	279.484	0.859
2011001	10000	9	111	0.001	0.002	0	0.005	0.001	0	0.001	0	0.009	0	0.005	279.642	0.858
2011001	10000	9	112	0.002	0.002	0	0.005	0.001	0	0.001	0	0.009	0	0.004	279.939	0.859
2011001	10000	10	1	0	0.002	0	0.002	0.001	0	0	0	0.005	0	0.003	291.921	0.837
2011001	10000	10	2	0	0.002	0	0.002	0.001	0	0	0	0.005	0	0.003	291.726	0.838
2011001	10000	10	3	0	0.002	0	0.002	0.001	0	0	0	0.004	0	0.003	291.501	0.836
2011001	10000	10	4	0	0.002	0	0.002	0.001	0	0	0	0.004	0	0.003	291.332	0.836
2011001	10000	10	5	0	0.002	0	0.002	0.001	0	0	0	0.004	0	0.003	291.167	0.836
2011001	10000	10	6	0	0.003	0	0.002	0.001	0	0	0	0.004	0	0.003	291.053	0.833
2011001	10000	10	7	0	0.002	0	0.002	0.001	0	0	0	0.004	0	0.003	290.917	0.831
2011001	10000	10	8	0	0.002	0	0.002	0.001	0	0	0	0.004	0	0.003	290.754	0.834
2011001	10000	10	9	0	0.002	0	0.002	0.001	0	0	0	0.004	0	0.003	290.586	0.835
2011001	10000	10	10	0	0.003	0	0.002	0.001	0	0	0	0.004	0	0.003	290.472	0.837
2011001	10000	10	11	0	0.003	0	0.002	0.001	0	0	0	0.004	0	0.003	290.321	0.84
2011001	10000	10	12	0	0.003	0	0.002	0.001	0	0	0	0.004	0	0.003	290.245	0.837
2011001	10000	10	13	0	0.003	0.001	0.002	0.001	0	0	0	0.004	0	0.003	290.034	0.846
2011001	10000	10	14	0	0.003	0.001	0.002	0.001	0	0	0	0.004	0	0.003	289.962	0.843
2011001	10000	10	15	0	0.003	0.001	0.002	0.001	0	0	0	0.004	0	0.004	289.831	0.847
2011001	10000	10	16	0	0.003	0.001	0.002	0.001	0	0	0	0.005	0	0.004	289.668	0.853
2011001	10000	10	17	0	0.004	0.001	0.002	0.001	0	0	0	0.005	0	0.004	289.493	0.857
2011001	10000	10	18	0	0.004	0.001	0.002	0.001	0	0	0	0.005	0	0.004	289.283	0.865
2011001	10000	10	19	0	0.004	0.001	0.002	0.001	0	0	0	0.005	0	0.004	289.13	0.87
2011001	10000	10	20	0	0.004	0.001	0.002	0.001	0	0	0	0.005	0	0.004	288.934	0.874
2011001	10000	10	21	0	0.004	0.001	0.002	0.001	0	0	0	0.005	0	0.004	288.821	0.876
2011001	10000	10	22	0	0.004	0.001	0.002	0.001	0	0	0	0.005	0	0.004	288.693	0.878
2011001	10000	10	23	0	0.004	0.001	0.002	0.001	0	0	0	0.005	0	0.004	288.58	0.879
2011001	10000	10	24	0	0.004	0.001	0.002	0.001	0	0	0	0.006	0	0.004	288.435	0.883
2011001	10000	10	25	0	0.004	0.001	0.003	0.001	0	0	0	0.006	0	0.004	288.253	0.888
2011001	10000	10	26	0	0.004	0.001	0.003	0.001	0	0	0	0.006	0	0.004	288.174	0.888
2011001	10000	10	27	0	0.004	0	0.003	0.001	0	0	0	0.006	0	0.004	288.083	0.888
2011001	10000	10	28	0	0.004	0	0.003	0.001	0	0	0	0.007	0	0.004	287.987	0.888
2011001	10000	10	29	0	0.004	0	0.003	0.001	0	0	0	0.007	0	0.004	287.854	0.891
2011001	10000	10	30	0	0.004	0	0.004	0.001	0	0	0	0.007	0	0.004	287.745	0.895
2011001	10000	10	31	0	0.004	0	0.004	0.001	0	0.001	0	0.007	0	0.005	287.702	0.897
2011001	10000	10	32	0	0.004	0	0.004	0.001	0	0.001	0	0.008	0	0.005	287.601	0.9
2011001	10000	10	33	0	0.004	0	0.004	0.002	0	0.001	0	0.008	0.001	0.005	287.573	0.903
2011001	10000	10	34	0	0.004	0	0.005	0.002	0	0.001	0.001	0.008	0.001	0.005	287.554	0.901
2011001	10000	10	35	0	0.005	0	0.005	0.002	0	0.001	0.001	0.008	0.001	0.005	287.537	0.903
2011001	10000	10	36	0	0.006	0	0.005	0.002	0	0.001	0.001	0.009	0.001	0.005	287.497	0.905
2011001	10000	10	37	0	0.007	0	0.005	0.002	0	0.001	0.001	0.009	0.001	0.006	287.438	0.908
2011001	10000	10	38	0	0.008	0.001	0.005	0.002	0	0.001	0.001	0.009	0.001	0.006	287.457	0.905
2011001	10000	10	39	0.001	0.009	0.001	0.005	0.002	0	0.001	0.001	0.009	0.001	0.006	287.396	0.905
2011001	10000	10	40	0.001	0.01	0.001	0.005	0.002	0	0.001	0.001	0.009	0.001	0.005	287.344	0.905
2011001	10000	10	41	0.001	0.008	0.001	0.005	0.002	0	0.001	0.001	0.008	0.001	0.005	287.252	0.905
2011001	10000	10	42	0.001	0.007	0.001	0.005	0.002	0	0.001	0.001	0.008	0.001	0.005	287.09	0.903
2011001	10000	10	43	0.001	0.007	0.001	0.005	0.002	0	0.001	0.001	0.009	0.001	0.005	286.937	0.902
2011001	10000	10	44	0.002	0.008	0.001	0.005	0.003	0	0.001	0.001	0.009	0.001	0.005	286.848	0.899
2011001	10000	10	45	0.002	0.008	0.001	0.005	0.003	0	0.001	0.001	0.008	0.001	0.005	286.716	0.897
2011001	10000	10	46	0.001	0.008	0.001	0.005	0.003	0	0.001	0.001	0.008	0.001	0.005	286.61	0.894
2011001	10000	10	47	0.001	0.009	0.001	0.005	0.003	0	0.001	0.001	0.008	0.001	0.005	286.423	0.895
2011001	10000	10	48	0.001	0.01	0.001	0.005	0.002	0	0.001	0.001	0.008	0.001	0.005	286.33	0.896
2011001	10000	10	49	0.002	0.011	0.001	0.005	0.002	0	0.001	0.001	0.008	0.001	0.006	286.178	0.898
2011001	10000	10	50	0.002	0.011	0.001	0.005	0.002	0	0.001	0.001	0.008	0.002	0.006	285.981	0.902
2011001	10000	10	51	0.002	0.011	0.001	0.005	0.002	0	0.001	0.001	0.008	0.001	0.006	285.883	0.905
2011001	10000	10	52	0.001	0.01	0.001	0.005	0.002	0	0.001	0.001	0.008	0.002	0.006	285.679	0.909
2011001	10000	10	53	0.001	0.011	0.001	0.005	0.002	0	0.001	0.001	0.008	0.002	0.006	285.522	0.909
2011001	10000	10	54	0.001	0.012	0.001	0.005	0.002	0	0.001	0.001	0.008	0.002	0.006	285.369	0.91
2011001	10000	10	55	0.001	0.013	0.001	0.005	0.002	0	0.001	0.001	0.008	0.002	0.006	285.173	0.909
2011001	10000	10	56	0.001	0.014	0.001	0.005	0.002	0	0.001	0.001	0.008	0.002	0.007	284.967	0.911
2011001	10000	10	57	0.001	0.015	0.001	0.004	0.001	0	0.001	0.001	0.008	0.002	0.006	284.849	0.911
2011001	10000	10	58	0.001	0.013	0.001	0.004	0.001	0	0.001	0.001	0.008	0.001	0.006	284.654	0.912
2011001	10000	10	59	0.002	0.011	0	0.004	0.001	0	0.001	0	0.008	0.001	0.005	284.539	0.913
2011001	10000	10	60	0.002	0.009	0	0.004	0.001	0	0.001	0	0.007	0.001	0.005	284.428	0.914
2011001	10000	10	61	0.002	0.007	0	0.004	0.001	0	0.001	0	0.007	0.001	0.005	284.393	0.914
2011001	10000	10	62	0.001	0.006	0	0.004	0.001	0	0.001	0	0.007	0	0.004	284.328	0.915
2011001	10000	10	63	0.001	0.006	0	0.004	0.001	0	0	0	0.007	0	0.004	284.23	0.915
2011001	10000	10	64	0.001	0.005	0	0.004	0.001	0	0	0	0.007	0	0.004	284.122	0.919
2011001	10000	10	65	0.001	0.005	0	0.003	0.001	0	0	0	0.006	0	0.004	284.033	0.919
2011001	10000	10	66	0.001	0.005	0	0.004	0.001	0	0	0	0.006	0	0.004	283.927	0.918
2011001	10000	10	67	0.001	0.005	0	0.003	0.001	0	0	0	0.006	0	0.004	283.853	0.92
2011001	10000	10	68	0	0.004	0	0.003	0.001	0	0	0	0.006	0	0.004	283.579	0.923
2011001	10000	10	69	0	0.004	0	0.003	0.001	0	0	0	0.006	0	0.004	283.456	0.924
2011001	10000	10	70	0	0.004	0	0.003	0.001	0	0	0	0.006	0	0.004	283.392	0.923
2011001	10000	10	71	0	0.004	0	0.003	0.001	0	0	0	0.006	0	0.004	283.177	0.921
2011001	10000	10	72	0	0.004	0	0.003	0.001	0	0	0	0.007	0	0.004	283.104	0.916
2011001	10000	10	73	0	0.004	0	0.003	0.001	0	0	0	0.007	0	0.005	283.116	0.912
2011001	10000	10	74	0	0.004	0	0.003	0.001	0	0	0	0.007	0	0.005	282.976	0.91
2011001	10000	10	75	0	0.004	0	0.003	0.001	0	0	0	0.008	0	0.005	282.936	0.907
2011001	10000	10	76	0	0.004	0	0.003	0.001	0	0	0	0.008	0	0.005	282.872	0.904
2011001	10000	10	77	0	0.004	0	0.003	0.001	0	0	0	0.008	0	0.005	282.763	0.906
2011001	10000	10	78	0	0.004	0	0.003	0.001	0	0	0	0.008	0	0.005	282.694	0.906
2011001	10000	10	79	0	0.004	0	0.003	0.001	0	0	0	0.008	0	0.005	282.613	0.908
2011001	10000	10	80	0	0.004	0	0.003	0.001	0	0	0	0.008	0	0.005	282.514	0.909
2011001	10000	10	81	0	0.004	0	0.003	0.001	0	0	0	0.009	0	0.005	282.417	0.911
2011001	10000	10	82	0	0.004	0	0.004	0.001	0	0	0	0.009	0	0.005	282.335	0.914
2011001	10000	10	83	0	0.004	0	0.004	0.001	0	0.001	0	0.009	0	0.006	282.229	0.914
2011001	10000	10	84	0	0.004	0	0.004	0.001	0	0.001	0	0.009	0	0.006	282.127	0.915
2011001	10000	10	85	0	0.003	0	0.004	0.001	0	0.001	0	0.009	0	0.006	282.056	0.916
2011001	10000	10	86	0	0.003	0	0.004	0.001	0	0.001	0	0.009	0	0.006	281.928	0.918
2011001	10000	10	87	0	0.003	0	0.004	0.001	0	0.001	0	0.009	0	0.006	281.842	0.92
2011001	10000	10	88	0	0.003	0	0.004	0.001	0	0.001	0	0.009	0	0.006	281.74	0.922
2011001	10000	10	89	0	0.003	0	0.004	0.001	0	0.001	0	0.009	0	0.006	281.588	0.923
2011001	10000	10	90	0	0.003	0	0.004	0.001	0	0.001	0	0.009	0	0.006	281.57	0.924
2011001	10000	10	91	0	0.003	0	0.004	0.001	0	0.001	0	0.008	0	0.005	281.418	0.925
2011001	10000	10	92	0	0.003	0	0.004	0.001	0	0.001	0	0.009	0	0.005	281.359	0.924
2011001	10000	10	93	0.001	0.003	0	0.004	0.001	0	0.001	0	0.009	0	0.005	281.275	0.923
2011001	10000	10	94	0.001	0.003	0	0.004	0.001	0	0.001	0	0.009	0	0.005	281.17	0.92
2011001	10000	10	95	0.001	0.003	0	0.004	0.001	0	0.001	0	0.009	0	0.005	280.979	0.921
2011001	10000	10	96	0.002	0.004	0	0.005	0.001	0	0.001	0	0.009	0	0.005	280.983	0.913
2011001	10000	10	97	0.004	0.004	0	0.005	0.001	0	0.001	0	0.01	0	0.005	280.837	0.907
2011001	10000	10	98	0.002	0.004	0	0.005	0.001	0	0.001	0	0.01	0	0.006	280.747	0.9
2011001	10000	10	99	0.002	0.004	0	0.005	0.001	0	0.001	0	0.01	0	0.006	280.609	0.899
2011001	10000	10	100	0.001	0.004	0	0.005	0.001	0	0.001	0	0.01	0	0.006	280.456	0.891
2011001	10000	10	101	0.001	0.004	0	0.005	0.001	0	0.001	0	0.01	0	0.005	280.325	0.886
2011001	10000	10	102	0.001	0.004	0	0.005	0.001	0	0.001	0	0.009	0	0.005	280.203	0.882
2011001	10000	10	103	0.001	0.003	0	0.005	0.002	0	0.001	0	0.009	0	0.005	280.051	0.879
2011001	10000	10	104	0.001	0.003	0	0.005	0.002	0	0.001	0	0.009	0	0.005	279.997	0.875
2011001	10000	10	105	0.001	0.003	0	0.005	0.002	0	0.001	0	0.009	0	0.005	279.97	0.869
2011001	10000	10	106	0.001	0.003	0	0.005	0.002	0	0.001	0	0.009	0	0.005	279.879	0.864
2011001	10000	10	107	0.001	0.002	0	0.005	0.002	0	0.001	0	0.01	0	0.005	279.784	0.861
2011001	10000	10	108	0.001	0.002	0	0.005	0.001	0	0.001	0	0.009	0	0.005	279.656	0.857
2011001	10000	10	109	0.001	0.002	0	0.005	0.001	0	0.001	0	0.009	0	0.005	279.44	0.853
2011001	10000	10	110	0.001	0.002	0	0.005	0.001	0	0.001	0	0.009	0	0.005	279.164	0.854
2011001	10000	10	111	0.002	0.002	0	0.004	0.001	0	0	0	0.008	0	0.004	278.883	0.862
2011001	10000	10	112	0.002	0.002	0	0.004	0.001	0	0	0	0.008	0	0.004	278.311	0.885
2011001	10000	11	1	0	0.002	0	0.002	0.001	0	0	0	0.005	0	0.003	291.801	0.838
2011001	10000	11	2	0	0.002	0	0.002	0.001	0	0	0	0.005	0	0.003	291.613	0.837
2011001	10000	11	3	0	0.002	0	0.002	0.001	0	0	0	0.004	0	0.003	291.396	0.84
2011001	10000	11	4	0	0.002	0	0.002	0.001	0	0	0	0.004	0	0.003	291.228	0.839
2011001	10000	11	5	0	0.002	0	0.002	0.001	0	0	0	0.004	0	0.003	291.017	0.841
2011001	10000	11	6	0	0.002	0	0.002	0.001	0	0	0	0.004	0	0.003	290.883	0.839
2011001	10000	11	7	0	0.002	0	0.002	0.001	0	0	0	0.004	0	0.003	290.725	0.838
2011001	10000	11	8	0	0.002	0	0.002	0.001	0	0	0	0.004	0	0.003	290.608	0.838
2011001	10000	11	9	0	0.003	0	0.002	0.001	0	0	0	0.004	0	0.003	290.438	0.84
2011001	10000	11	10	0	0.003	0	0.002	0.001	0	0	0	0.004	0	0.003	290.29	0.842
2011001	10000	11	11	0	0.003	0	0.002	0.001	0	0	0	0.004	0	0.003	290.191	0.843
2011001	10000	11	12	0	0.003	0	0.002	0.001	0	0	0	0.004	0	0.003	290.08	0.845
2011001	10000	11	13	0	0.003	0	0.002	0.001	0	0	0	0.004	0	0.003	289.994	0.846
2011001	10000	11	14	0	0.003	0	0.002	0.001	0	0	0	0.004	0	0.003	289.775	0.853
2011001	10000	11	15	0	0.003	0	0.002	0.001	0	0	0	0.004	0	0.003	289.677	0.855
2011001	10000	11	16	0	0.003	0.001	0.002	0.001	0	0	0	0.004	0	0.004	289.55	0.859
2011001	10000	11	17	0	0.003	0.001	0.002	0.001	0	0	0	0.005	0	0.004	289.388	0.864
2011001	10000	11	18	0	0.004	0.001	0.002	0.001	0	0	0	0.005	0	0.004	289.212	0.869
2011001	10000	11	19	0	0.004	0.001	0.002	0.001	0	0	0	0.005	0	0.004	289.013	0.874
2011001	10000	11	20	0	0.004	0.001	0.002	0.001	0	0	0	0.005	0	0.004	288.884	0.876
2011001	10000	11	21	0	0.004	0.001	0.002	0.001	0	0	0	0.005	0	0.004	288.73	0.879
2011001	10000	11	22	0	0.004	0.001	0.002	0.001	0	0	0	0.005	0	0.004	288.586	0.882
2011001	10000	11	23	0	0.004	0.001	0.002	0.001	0	0	0	0.005	0	0.004	288.413	0.885
2011001	10000	11	24	0	0.004	0.001	0.002	0.001	0	0	0	0.006	0	0.004	288.275	0.887
2011001	10000	11	25	0	0.004	0.001	0.003	0.001	0	0	0	0.006	0	0.004	288.18	0.887
2011001	10000	11	26	0	0.004	0.001	0.003	0.001	0	0	0	0.006	0	0.004	288.051	0.887
2011001	10000	11	27	0	0.004	0	0.003	0.001	0	0	0	0.006	0	0.004	287.955	0.889
2011001	10000	11	28	0	0.004	0	0.003	0.001	0	0	0	0.007	0	0.004	287.818	0.894
2011001	10000	11	29	0	0.004	0	0.003	0.001	0	0	0	0.007	0	0.004	287.72	0.896
2011001	10000	11	30	0	0.004	0	0.004	0.001	0	0	0	0.007	0	0.004	287.669	0.896
2011001	10000	11	31	0	0.004	0	0.004	0.001	0	0.001	0	0.007	0	0.004	287.558	0.899
2011001	10000	11	32	0	0.004	0	0.004	0.001	0	0.001	0	0.007	0.001	0.004	287.516	0.902
2011001	10000	11	33	0	0.004	0	0.004	0.001	0	0.001	0	0.008	0.001	0.004	287.45	0.904
2011001	10000	11	34	0	0.005	0	0.005	0.002	0	0.001	0.001	0.008	0.001	0.005	287.406	0.906
2011001	10000	11	35	0	0.005	0	0.005	0.002	0	0.001	0.001	0.008	0.001	0.005	287.406	0.91
2011001	10000	11	36	0	0.006	0	0.005	0.002	0	0.001	0.001	0.009	0.001	0.005	287.408	0.91
2011001	10000	11	37	0	0.007	0.001	0.005	0.002	0	0.001	0.001	0.009	0.001	0.005	287.414	0.91
2011001	10000	11	38	0	0.008	0.001	0.006	0.002	0	0.001	0.001	0.009	0.001	0.006	287.324	0.911
2011001	10000	11	39	0.001	0.009	0.001	0.006	0.002	0	0.001	0.001	0.009	0.001	0.005	287.28	0.909
2011001	10000	11	40	0.001	0.009	0.001	0.006	0.002	0	0.001	0.001	0.008	0.001	0.005	287.27	0.904
2011001	10000	11	41	0.001	0.008	0.001	0.006	0.002	0	0.001	0.001	0.008	0.001	0.005	287.096	0.905
2011001	10000	11	42	0.001	0.008	0.001	0.006	0.003	0	0.001	0.001	0.008	0.001	0.005	287.004	0.902
2011001	10000	11	43	0.001	0.008	0.001	0.006	0.003	0	0.001	0.001	0.008	0.001	0.005	286.918	0.899
2011001	10000	11	44	0.002	0.008	0.001	0.006	0.003	0	0.001	0.001	0.008	0.001	0.005	286.708	0.897
2011001	10000	11	45	0.002	0.008	0.001	0.006	0.003	0	0.001	0.001	0.008	0.001	0.005	286.595	0.896
2011001	10000	11	46	0.001	0.009	0.001	0.005	0.003	0	0.001	0.001	0.008	0.001	0.005	286.477	0.892
2011001	10000	11	47	0.001	0.01	0.001	0.005	0.003	0	0.001	0.001	0.008	0.001	0.005	286.37	0.891
2011001	10000	11	48	0.002	0.011	0.001	0.006	0.003	0	0.001	0.001	0.008	0.001	0.005	286.245	0.888
2011001	10000	11	49	0.002	0.012	0.001	0.005	0.003	0	0.001	0.001	0.008	0.002	0.006	286.064	0.893
2011001	10000	11	50	0.003	0.012	0.001	0.005	0.003	0	0.001	0.001	0.008	0.002	0.006	285.963	0.896
2011001	10000	11	51	0.002	0.012	0.001	0.005	0.002	0	0.001	0.001	0.008	0.002	0.006	285.768	0.901
2011001	10000	11	52	0.001	0.012	0.001	0.005	0.002	0	0.001	0.001	0.008	0.002	0.006	285.594	0.906
2011001	10000	11	53	0.002	0.012	0.001	0.005	0.002	0	0.001	0.001	0.007	0.002	0.006	285.454	0.908
2011001	10000	11	54	0.002	0.013	0.001	0.005	0.002	0	0.001	0.001	0.007	0.002	0.006	285.25	0.908
2011001	10000	11	55	0.002	0.015	0.001	0.004	0.002	0	0.001	0.001	0.008	0.003	0.006	285.065	0.911
2011001	10000	11	56	0.002	0.018	0.001	0.004	0.002	0	0.001	0.001	0.008	0.003	0.007	284.942	0.911
2011001	10000	11	57	0.002	0.02	0.001	0.004	0.001	0	0.001	0.001	0.008	0.002	0.007	284.745	0.914
2011001	10000	11	58	0.002	0.02	0.001	0.004	0.001	0	0.001	0.001	0.008	0.002	0.007	284.589	0.917
2011001	10000	11	59	0.002	0.018	0.001	0.004	0.001	0	0.001	0.001	0.008	0.001	0.006	284.457	0.918
2011001	10000	11	60	0.003	0.016	0.001	0.004	0.001	0	0.001	0.001	0.007	0.001	0.005	284.266	0.92
2011001	10000	11	61	0.003	0.014	0.001	0.004	0.001	0	0	0.001	0.007	0.001	0.005	284.176	0.921
2011001	10000	11	62	0.002	0.01	0.001	0.003	0.001	0	0	0.001	0.006	0.001	0.005	284.064	0.924
2011001	10000	11	63	0.001	0.008	0.001	0.003	0.001	0	0	0	0.006	0.001	0.004	284.043	0.925
2011001	10000	11	64	0.001	0.007	0.001	0.003	0.001	0	0	0	0.006	0.001	0.004	283.967	0.925
2011001	10000	11	65	0.001	0.006	0	0.003	0.001	0	0	0	0.006	0.001	0.004	283.867	0.927
2011001	10000	11	66	0.001	0.006	0.001	0.003	0.001	0	0	0	0.006	0.001	0.004	283.807	0.924
2011001	10000	11	67	0.001	0.006	0.001	0.003	0.001	0	0	0	0.006	0	0.004	283.701	0.923
2011001	10000	11	68	0.001	0.006	0.001	0.003	0.001	0	0	0	0.006	0	0.004	283.491	0.922
2011001	10000	11	69	0.001	0.005	0.001	0.003	0.001	0	0	0	0.006	0	0.004	283.342	0.922
2011001	10000	11	70	0	0.005	0	0.003	0.001	0	0	0	0.006	0	0.004	283.158	0.923
2011001	10000	11	71	0	0.004	0	0.003	0.001	0	0	0	0.006	0	0.004	283.095	0.92
2011001	10000	11	72	0	0.004	0	0.003	0.001	0	0	0	0.006	0	0.004	283.175	0.918
2011001	10000	11	73	0	0.004	0	0.003	0.001	0	0	0	0.006	0	0.004	283.151	0.915
2011001	10000	11	74	0	0.004	0	0.003	0.001	0	0	0	0.007	0	0.004	283.127	0.913
2011001	10000	11	75	0	0.004	0	0.003	0.001	0	0	0	0.007	0	0.005	283.057	0.91
2011001	10000	11	76	0	0.004	0	0.003	0.001	0	0	0	0.007	0	0.005	282.881	0.906
2011001	10000	11	77	0	0.004	0	0.003	0.001	0	0	0	0.008	0	0.005	282.723	0.905
2011001	10000	11	78	0.001	0.004	0	0.003	0.001	0	0	0	0.008	0	0.005	282.655	0.903
2011001	10000	11	79	0.001	0.005	0	0.003	0.001	0	0	0	0.008	0	0.005	282.538	0.905
2011001	10000	11	80	0	0.005	0	0.003	0.001	0	0	0	0.008	0	0.005	282.503	0.903
2011001	10000	11	81	0	0.005	0	0.003	0.001	0	0	0	0.008	0	0.005	282.414	0.906
2011001	10000	11	82	0	0.004	0	0.004	0.001	0	0	0	0.008	0	0.005	282.264	0.911
2011001	10000	11	83	0	0.004	0	0.004	0.001	0	0.001	0	0.009	0	0.006	282.209	0.912
2011001	10000	11	84	0	0.004	0	0.004	0.001	0	0.001	0	0.009	0	0.006	282.139	0.913
2011001	10000	11	85	0	0.004	0	0.004	0.001	0	0.001	0	0.009	0	0.006	282.002	0.915
2011001	10000	11	86	0	0.004	0	0.004	0.001	0	0.001	0	0.009	0	0.006	281.952	0.914
2011001	10000	11	87	0	0.003	0	0.004	0.001	0	0.001	0	0.009	0	0.006	281.814	0.916
2011001	10000	11	88	0	0.003	0	0.004	0.001	0	0.001	0	0.009	0	0.006	281.692	0.917
2011001	10000	11	89	0	0.003	0	0.004	0.001	0	0.001	0	0.009	0	0.006	281.63	0.92
2011001	10000	11	90	0	0.003	0	0.004	0.001	0	0.001	0	0.009	0	0.006	281.561	0.919
2011001	10000	11	91	0	0.003	0	0.004	0.001	0	0.001	0	0.009	0	0.005	281.426	0.921
2011001	10000	11	92	0	0.003	0	0.004	0.001	0	0.001	0	0.009	0	0.005	281.36	0.919
2011001	10000	11	93	0.001	0.003	0	0.004	0.001	0	0.001	0	0.009	0	0.005	281.21	0.92
2011001	10000	11	94	0.001	0.004	0	0.004	0.001	0	0.001	0	0.009	0	0.005	281.084	0.919
2011001	10000	11	95	0.001	0.004	0	0.004	0.001	0	0.001	0	0.009	0	0.005	281.044	0.915
2011001	10000	11	96	0.002	0.004	0	0.004	0.001	0	0.001	0	0.009	0	0.005	280.942	0.908
2011001	10000	11	97	0.003	0.004	0	0.005	0.001	0	0.001	0	0.009	0	0.005	280.813	0.905
2011001	10000	11	98	0.002	0.004	0	0.005	0.001	0	0.001	0	0.01	0	0.006	280.717	0.9
2011001	10000	11	99	0.002	0.005	0	0.005	0.001	0	0.001	0	0.01	0	0.006	280.587	0.893
2011001	10000	11	100	0.001	0.004	0	0.005	0.001	0	0.001	0	0.01	0	0.006	280.412	0.888
2011001	10000	11	101	0.001	0.004	0	0.005	0.001	0	0.001	0	0.009	0	0.006	280.175	0.888
2011001	10000	11	102	0.001	0.004	0	0.005	0.001	0	0.001	0	0.009	0	0.005	279.899	0.885
2011001	10000	11	103	0.001	0.003	0	0.005	0.002	0	0.001	0	0.009	0	0.005	279.742	0.883
2011001	10000	11	104	0.001	0.003	0	0.005	0.002	0	0.001	0	0.009	0	0.005	279.683	0.877
2011001	10000	11	105	0.001	0.003	0	0.005	0.002	0	0.001	0	0.009	0	0.005	279.725	0.869
2011001	10000	11	106	0.001	0.002	0	0.005	0.002	0	0.001	0	0.009	0	0.005	279.818	0.861
2011001	10000	11	107	0.001	0.002	0	0.005	0.002	0	0.001	0	0.009	0	0.005	279.749	0.856
2011001	10000	11	108	0.001	0.002	0	0.005	0.002	0	0.001	0	0.009	0	0.004	279.508	0.851
2011001	10000	11	109	0.001	0.002	0	0.005	0.002	0	0.001	0	0.009	0	0.004	279.176	0.852
2011001	10000	11	110	0.001	0.002	0	0.004	0.001	0	0	0	0.008	0	0.004	278.446	0.86
2011001	10000	11	111	0.001	0.001	0	0.003	0	0	0	0	0.008	0	0.004	275.546	0.927
2011001	10000	11	112	0.002	0.001	0	0.002	0	0	0	0	0.007	0	0.004	275.22	0.931
2011001	10000	12	1	0	0.002	0	0.002	0.001	0	0	0	0.005	0	0.003	291.752	0.841
2011001	10000	12	2	0	0.002	0	0.002	0.001	0	0	0	0.005	0	0.003	291.483	0.84
2011001	10000	12	3	0	0.002	0	0.002	0.001	0	0	0	0.004	0	0.003	291.345	0.839
2011001	10000	12	4	0	0.002	0	0.002	0.001	0	0	0	0.004	0	0.003	291.122	0.839
2011001	10000	12	5	0	0.002	0	0.002	0.001	0	0	0	0.004	0	0.003	290.96	0.841
2011001	10000	12	6	0	0.002	0	0.002	0.001	0	0	0	0.004	0	0.003	290.787	0.84
2011001	10000	12	7	0	0.002	0	0.002	0.001	0	0	0	0.004	0	0.003	290.626	0.843
2011001	10000	12	8	0	0.002	0	0.002	0.001	0	0	0	0.004	0	0.003	290.493	0.84
2011001	10000	12	9	0	0.003	0	0.002	0.001	0	0	0	0.004	0	0.003	290.327	0.841
2011001	10000	12	10	0	0.003	0	0.002	0.001	0	0	0	0.004	0	0.003	290.215	0.843
2011001	10000	12	11	0	0.003	0	0.002	0.001	0	0	0	0.004	0	0.003	290.103	0.845
2011001	10000	12	12	0	0.003	0	0.002	0.001	0	0	0	0.004	0	0.003	290.012	0.845
2011001	10000	12	13	0	0.003	0	0.002	0.001	0	0	0	0.004	0	0.003	289.8	0.855
2011001	10000	12	14	0	0.003	0	0.002	0.001	0	0	0	0.004	0	0.003	289.689	0.856
2011001	10000	12	15	0	0.003	0	0.002	0.001	0	0	0	0.004	0	0.004	289.537	0.862
2011001	10000	12	16	0	0.003	0.001	0.002	0.001	0	0	0	0.004	0	0.004	289.394	0.868
2011001	10000	12	17	0	0.003	0.001	0.002	0.001	0	0	0	0.004	0	0.004	289.187	0.877
2011001	10000	12	18	0	0.003	0.001	0.002	0.001	0	0	0	0.005	0	0.004	288.98	0.882
2011001	10000	12	19	0	0.003	0.001	0.002	0.001	0	0	0	0.005	0	0.004	288.861	0.883
2011001	10000	12	20	0	0.004	0.001	0.002	0.001	0	0	0	0.005	0	0.004	288.715	0.884
2011001	10000	12	21	0	0.004	0.001	0.002	0.001	0	0	0	0.005	0	0.004	288.563	0.888
2011001	10000	12	22	0	0.004	0.001	0.002	0.001	0	0	0	0.005	0	0.004	288.419	0.889
2011001	10000	12	23	0	0.004	0.001	0.002	0.001	0	0	0	0.005	0	0.004	288.264	0.891
2011001	10000	12	24	0	0.004	0.001	0.002	0.001	0	0	0	0.006	0	0.004	288.176	0.889
2011001	10000	12	25	0	0.004	0.001	0.003	0.001	0	0	0	0.006	0	0.004	288.036	0.89
2011001	10000	12	26	0	0.004	0.001	0.003	0.001	0	0	0	0.006	0	0.004	287.929	0.892
2011001	10000	12	27	0	0.004	0.001	0.003	0.001	0	0	0	0.006	0	0.004	287.829	0.893
2011001	10000	12	28	0	0.004	0	0.003	0.001	0	0	0	0.007	0	0.004	287.728	0.896
2011001	10000	12	29	0	0.004	0	0.003	0.001	0	0	0	0.007	0	0.004	287.629	0.898
2011001	10000	12	30	0	0.004	0	0.004	0.001	0	0	0	0.007	0	0.004	287.517	0.899
2011001	10000	12	31	0	0.004	0	0.004	0.001	0	0.001	0	0.007	0	0.004	287.465	0.902
2011001	10000	12	32	0	0.004	0	0.004	0.001	0	0.001	0	0.008	0.001	0.004	287.376	0.904
2011001	10000	12	33	0	0.004	0	0.005	0.001	0	0.001	0.001	0.008	0.001	0.004	287.346	0.906
2011001	10000	12	34	0	0.005	0	0.005	0.002	0	0.001	0.001	0.008	0.001	0.005	287.373	0.909
2011001	10000	12	35	0	0.005	0	0.005	0.002	0	0.001	0.001	0.008	0.001	0.005	287.358	0.911
2011001	10000	12	36	0	0.006	0	0.005	0.002	0	0.001	0.001	0.009	0.001	0.005	287.404	0.91
2011001	10000	12	37	0	0.007	0	0.006	0.002	0	0.001	0.001	0.009	0.001	0.005	287.302	0.912
2011001	10000	12	38	0.001	0.008	0.001	0.006	0.002	0	0.001	0.001	0.009	0.001	0.005	287.29	0.909
2011001	10000	12	39	0.001	0.009	0.001	0.006	0.002	0	0.001	0.001	0.008	0.001	0.005	287.202	0.91
2011001	10000	12	40	0.001	0.009	0.001	0.006	0.002	0	0.001	0.001	0.008	0.001	0.005	287.087	0.906
2011001	10000	12	41	0.001	0.009	0.001	0.006	0.003	0	0.001	0.001	0.008	0.001	0.005	287.057	0.902
2011001	10000	12	42	0.001	0.008	0.001	0.006	0.003	0	0.001	0.001	0.008	0.001	0.005	286.953	0.899
2011001	10000	12	43	0.002	0.008	0.001	0.006	0.003	0	0.001	0.001	0.008	0.001	0.005	286.762	0.899
2011001	10000	12	44	0.002	0.009	0.001	0.006	0.003	0	0.001	0.001	0.008	0.001	0.005	286.642	0.899
2011001	10000	12	45	0.002	0.009	0.001	0.006	0.003	0	0.001	0.001	0.008	0.001	0.005	286.519	0.895
2011001	10000	12	46	0.001	0.01	0.001	0.006	0.003	0	0.001	0.001	0.008	0.001	0.005	286.443	0.891
2011001	10000	12	47	0.002	0.011	0.001	0.005	0.003	0	0.001	0.001	0.008	0.001	0.005	286.276	0.885
2011001	10000	12	48	0.002	0.012	0.001	0.005	0.003	0	0.001	0.001	0.008	0.002	0.005	286.104	0.886
2011001	10000	12	49	0.003	0.013	0.002	0.005	0.003	0.001	0.001	0.001	0.008	0.002	0.006	286.039	0.883
2011001	10000	12	50	0.003	0.013	0.002	0.005	0.003	0.001	0.001	0.001	0.008	0.002	0.006	285.837	0.888
2011001	10000	12	51	0.002	0.013	0.002	0.005	0.003	0.001	0.001	0.001	0.008	0.003	0.006	285.694	0.892
2011001	10000	12	52	0.002	0.014	0.002	0.005	0.002	0.001	0.001	0.001	0.008	0.003	0.007	285.575	0.896
2011001	10000	12	53	0.002	0.015	0.002	0.004	0.002	0.001	0.001	0.001	0.007	0.003	0.007	285.377	0.9
2011001	10000	12	54	0.002	0.016	0.002	0.004	0.002	0.001	0.001	0.001	0.007	0.004	0.007	285.252	0.901
2011001	10000	12	55	0.002	0.018	0.002	0.004	0.002	0.001	0.001	0.001	0.007	0.005	0.007	285.113	0.902
2011001	10000	12	56	0.002	0.02	0.002	0.004	0.002	0.001	0.001	0.001	0.007	0.005	0.007	284.923	0.904
2011001	10000	12	57	0.002	0.024	0.002	0.003	0.001	0.001	0.001	0.002	0.007	0.006	0.008	284.72	0.912
2011001	10000	12	58	0.003	0.03	0.002	0.003	0.001	0.001	0.001	0.002	0.007	0.005	0.008	284.625	0.914
2011001	10000	12	59	0.004	0.03	0.002	0.003	0.001	0.001	0	0.002	0.008	0.005	0.008	284.415	0.918
2011001	10000	12	60	0.005	0.025	0.001	0.003	0.001	0.001	0	0.001	0.007	0.011	0.009	284.201	0.923
2011001	10000	12	61	0.004	0.02	0.001	0.003	0.001	0	0	0.001	0.007	0.007	0.007	284.043	0.925
2011001	10000	12	62	0.002	0.016	0.001	0.003	0.001	0	0	0.001	0.006	0.002	0.006	283.874	0.927
2011001	10000	12	63	0.002	0.012	0.001	0.003	0.001	0	0	0.001	0.006	0.002	0.006	283.895	0.93
2011001	10000	12	64	0.002	0.009	0.001	0.003	0.001	0	0	0.001	0.006	0.001	0.005	283.825	0.927
2011001	10000	12	65	0.002	0.009	0.001	0.003	0.001	0	0	0.001	0.006	0.001	0.005	283.767	0.926
2011001	10000	12	66	0.002	0.008	0.001	0.003	0.001	0	0	0.001	0.006	0.001	0.005	283.713	0.925
2011001	10000	12	67	0.002	0.008	0.001	0.003	0.001	0	0	0.001	0.006	0.001	0.005	283.576	0.92
2011001	10000	12	68	0.002	0.008	0.001	0.003	0.001	0	0	0.001	0.006	0.001	0.005	283.404	0.916
2011001	10000	12	69	0.002	0.008	0.001	0.003	0.001	0	0	0.001	0.007	0.001	0.005	283.214	0.912
2011001	10000	12	70	0.001	0.007	0.001	0.003	0.001	0	0	0.001	0.006	0	0.004	283.05	0.912
2011001	10000	12	71	0.001	0.006	0.001	0.003	0.001	0	0	0.001	0.006	0	0.004	283.027	0.913
2011001	10000	12	72	0.001	0.005	0.001	0.003	0.001	0	0	0.001	0.006	0	0.004	283.224	0.914
2011001	10000	12	73	0.001	0.004	0.001	0.003	0.001	0	0	0.001	0.006	0	0.004	283.428	0.91
2011001	10000	12	74	0.001	0.004	0	0.003	0.001	0	0	0.001	0.006	0	0.004	283.43	0.91
2011001	10000	12	75	0.001	0.004	0	0.003	0.001	0	0	0.001	0.007	0	0.004	283.364	0.908
2011001	10000	12	76	0.001	0.004	0	0.003	0.001	0	0	0.001	0.007	0	0.004	283.113	0.905
2011001	10000	12	77	0.001	0.005	0	0.003	0.001	0	0	0.001	0.007	0	0.005	282.806	0.899
2011001	10000	12	78	0.001	0.005	0	0.003	0.001	0	0	0.001	0.008	0.001	0.005	282.621	0.895
2011001	10000	12	79	0.001	0.005	0	0.003	0.001	0	0	0.001	0.008	0.001	0.005	282.568	0.896
2011001	10000	12	80	0.001	0.005	0	0.003	0.001	0	0	0	0.008	0.001	0.005	282.458	0.899
2011001	10000	12	81	0.001	0.005	0	0.004	0.001	0	0	0	0.008	0.001	0.005	282.372	0.901
2011001	10000	12	82	0	0.005	0	0.004	0.001	0	0.001	0	0.008	0.001	0.005	282.27	0.905
2011001	10000	12	83	0	0.005	0	0.004	0.001	0	0.001	0	0.008	0.001	0.005	282.147	0.909
2011001	10000	12	84	0	0.005	0	0.004	0.001	0	0.001	0	0.009	0.001	0.006	282.085	0.909
2011001	10000	12	85	0	0.004	0	0.004	0.001	0	0.001	0	0.009	0	0.006	282.019	0.91
2011001	10000	12	86	0	0.004	0	0.005	0.001	0	0.001	0	0.009	0	0.006	281.887	0.911
2011001	10000	12	87	0	0.004	0	0.005	0.001	0	0.001	0	0.009	0	0.006	281.741	0.914
2011001	10000	12	88	0	0.004	0	0.004	0.001	0	0.001	0	0.009	0	0.006	281.717	0.914
2011001	10000	12	89	0.001	0.004	0	0.004	0.001	0	0.001	0	0.009	0	0.006	281.539	0.916
2011001	10000	12	90	0.001	0.004	0	0.004	0.001	0	0.001	0	0.009	0	0.006	281.459	0.919
2011001	10000	12	91	0.001	0.004	0	0.004	0.001	0	0.001	0	0.009	0	0.005	281.354	0.918
2011001	10000	12	92	0.001	0.004	0	0.005	0.001	0	0.001	0	0.009	0	0.005	281.296	0.914
2011001	10000	12	93	0.001	0.004	0	0.005	0.001	0	0.001	0	0.009	0	0.005	281.196	0.914
2011001	10000	12	94	0.001	0.004	0	0.005	0.001	0	0.001	0	0.009	0	0.005	281.085	0.914
2011001	10000	12	95	0.002	0.005	0	0.005	0.001	0	0.001	0	0.009	0	0.005	281.018	0.908
2011001	10000	12	96	0.003	0.005	0	0.005	0.001	0	0.001	0	0.009	0	0.005	280.92	0.904
2011001	10000	12	97	0.002	0.005	0	0.005	0.001	0	0.001	0	0.009	0	0.005	280.783	0.903
2011001	10000	12	98	0.002	0.005	0	0.005	0.001	0	0.001	0	0.01	0	0.006	280.638	0.897
2011001	10000	12	99	0.001	0.005	0	0.005	0.001	0	0.001	0	0.01	0	0.006	280.466	0.893
2011001	10000	12	100	0.001	0.005	0	0.005	0.001	0	0.001	0	0.01	0	0.006	280.265	0.891
2011001	10000	12	101	0.001	0.005	0	0.005	0.001	0	0.001	0	0.009	0	0.006	279.931	0.89
2011001	10000	12	102	0.001	0.004	0	0.005	0.001	0	0.001	0	0.009	0	0.005	279.55	0.891
2011001	10000	12	103	0.001	0.003	0	0.005	0.002	0	0.001	0	0.009	0	0.005	279.293	0.889
2011001	10000	12	104	0.001	0.003	0	0.005	0.002	0	0.001	0	0.008	0	0.005	279.28	0.881
2011001	10000	12	105	0.001	0.003	0	0.005	0.002	0	0.001	0	0.008	0	0.004	279.458	0.872
2011001	10000	12	106	0.001	0.002	0	0.005	0.002	0	0.001	0	0.008	0	0.004	279.662	0.86
2011001	10000	12	107	0.001	0.002	0	0.005	0.002	0	0.001	0	0.008	0	0.004	279.759	0.849
2011001	10000	12	108	0.001	0.002	0	0.005	0.002	0	0.001	0	0.008	0	0.004	279.437	0.848
2011001	10000	12	109	0.001	0.002	0	0.004	0.002	0	0.001	0	0.008	0	0.004	279.014	0.847
2011001	10000	12	110	0.001	0.002	0	0.004	0.002	0	0.001	0	0.008	0	0.004	278.599	0.839
2011001	10000	12	111	0.002	0.002	0	0.004	0.002	0	0	0	0.007	0	0.004	277.629	0.844
2011001	10000	12	112	0.003	0.002	0	0.003	0.001	0	0	0	0.007	0	0.004	277.311	0.85
2011001	10000	13	1	0	0.002	0	0.002	0.001	0	0	0	0.005	0	0.003	291.601	0.845
2011001	10000	13	2	0	0.002	0	0.002	0.001	0	0	0	0.004	0	0.003	291.438	0.842
2011001	10000	13	3	0	0.002	0	0.002	0.001	0	0	0	0.004	0	0.003	291.235	0.84
2011001	10000	13	4	0	0.002	0	0.002	0.001	0	0	0	0.004	0	0.003	291.066	0.841
2011001	10000	13	5	0	0.002	0	0.002	0.001	0	0	0	0.004	0	0.003	290.828	0.844
2011001	10000	13	6	0	0.002	0	0.002	0.001	0	0	0	0.004	0	0.003	290.661	0.844
2011001	10000	13	7	0	0.002	0	0.002	0.001	0	0	0	0.004	0	0.003	290.494	0.845
2011001	10000	13	8	0	0.002	0	0.002	0.001	0	0	0	0.004	0	0.003	290.347	0.845
2011001	10000	13	9	0	0.002	0	0.002	0.001	0	0	0	0.004	0	0.003	290.223	0.847
2011001	10000	13	10	0	0.003	0	0.002	0.001	0	0	0	0.004	0	0.003	290.042	0.852
2011001	10000	13	11	0	0.003	0	0.002	0.001	0	0	0	0.004	0	0.003	289.998	0.851
2011001	10000	13	12	0	0.003	0	0.002	0.001	0	0	0	0.004	0	0.003	289.843	0.855
2011001	10000	13	13	0	0.003	0	0.002	0.001	0	0	0	0.004	0	0.003	289.736	0.858
2011001	10000	13	14	0	0.003	0	0.002	0.001	0	0	0	0.004	0	0.003	289.522	0.867
2011001	10000	13	15	0	0.003	0	0.002	0.001	0	0	0	0.004	0	0.004	289.377	0.87
2011001	10000	13	16	0	0.003	0.001	0.002	0.001	0	0	0	0.004	0	0.004	289.228	0.877
2011001	10000	13	17	0	0.003	0.001	0.002	0.001	0	0	0	0.004	0	0.004	289.057	0.882
2011001	10000	13	18	0	0.003	0.001	0.002	0.001	0	0	0	0.004	0	0.004	288.894	0.888
2011001	10000	13	19	0	0.003	0.001	0.002	0.001	0	0	0	0.005	0	0.004	288.709	0.888
2011001	10000	13	20	0	0.003	0.001	0.002	0.001	0	0	0	0.005	0	0.004	288.543	0.893
2011001	10000	13	21	0	0.003	0.001	0.002	0.001	0	0	0	0.005	0	0.004	288.411	0.893
2011001	10000	13	22	0	0.003	0.001	0.002	0.001	0	0	0	0.005	0	0.004	288.287	0.894
2011001	10000	13	23	0	0.003	0.001	0.002	0.001	0	0	0	0.005	0	0.004	288.155	0.894
2011001	10000	13	24	0	0.004	0.001	0.003	0.001	0	0	0	0.006	0	0.004	288.01	0.895
2011001	10000	13	25	0	0.004	0.001	0.003	0.001	0	0	0	0.006	0	0.004	287.91	0.896
2011001	10000	13	26	0	0.004	0.001	0.003	0.001	0	0	0	0.006	0	0.004	287.805	0.895
2011001	10000	13	27	0	0.004	0.001	0.003	0.001	0	0	0	0.006	0	0.004	287.709	0.894
2011001	10000	13	28	0	0.004	0	0.003	0.001	0	0	0	0.006	0	0.004	287.63	0.899
2011001	10000	13	29	0	0.004	0	0.003	0.001	0	0	0	0.006	0	0.004	287.492	0.902
2011001	10000	13	30	0	0.004	0	0.004	0.001	0	0	0	0.007	0	0.004	287.435	0.904
2011001	10000	13	31	0	0.004	0	0.004	0.001	0	0.001	0	0.007	0	0.004	287.304	0.906
2011001	10000	13	32	0	0.004	0	0.004	0.001	0	0.001	0	0.007	0.001	0.004	287.26	0.906
2011001	10000	13	33	0	0.004	0	0.005	0.001	0	0.001	0.001	0.008	0.001	0.004	287.245	0.91
2011001	10000	13	34	0	0.005	0	0.005	0.002	0	0.001	0.001	0.008	0.001	0.005	287.217	0.914
2011001	10000	13	35	0	0.006	0	0.005	0.002	0	0.001	0.001	0.008	0.001	0.005	287.209	0.917
2011001	10000	13	36	0	0.006	0	0.005	0.002	0	0.001	0.001	0.008	0.001	0.005	287.255	0.915
2011001	10000	13	37	0.001	0.007	0.001	0.006	0.002	0	0.001	0.001	0.008	0.001	0.005	287.239	0.913
2011001	10000	13	38	0.001	0.008	0.001	0.006	0.002	0	0.001	0.001	0.008	0.001	0.005	287.196	0.912
2011001	10000	13	39	0.001	0.009	0.001	0.006	0.002	0	0.001	0.001	0.008	0.001	0.005	287.091	0.91
2011001	10000	13	40	0.001	0.01	0.001	0.006	0.003	0	0.001	0.001	0.008	0.002	0.005	287.111	0.902
2011001	10000	13	41	0.001	0.009	0.001	0.006	0.003	0	0.001	0.001	0.008	0.002	0.005	286.971	0.9
2011001	10000	13	42	0.002	0.01	0.001	0.006	0.003	0	0.001	0.001	0.008	0.002	0.005	286.818	0.899
2011001	10000	13	43	0.002	0.01	0.001	0.006	0.003	0	0.001	0.001	0.008	0.001	0.005	286.748	0.897
2011001	10000	13	44	0.002	0.009	0.001	0.006	0.003	0	0.001	0.001	0.008	0.001	0.005	286.545	0.897
2011001	10000	13	45	0.002	0.01	0.001	0.006	0.003	0	0.001	0.001	0.008	0.002	0.005	286.426	0.893
2011001	10000	13	46	0.001	0.01	0.001	0.006	0.003	0	0.001	0.001	0.008	0.002	0.005	286.324	0.891
2011001	10000	13	47	0.002	0.011	0.001	0.005	0.003	0.001	0.001	0.001	0.008	0.002	0.005	286.148	0.886
2011001	10000	13	48	0.002	0.013	0.001	0.005	0.003	0.001	0.001	0.001	0.008	0.002	0.005	286.046	0.881
2011001	10000	13	49	0.003	0.014	0.001	0.005	0.003	0.001	0.001	0.001	0.008	0.002	0.006	285.803	0.881
2011001	10000	13	50	0.003	0.015	0.002	0.005	0.003	0.001	0.001	0.002	0.008	0.002	0.006	285.709	0.879
2011001	10000	13	51	0.002	0.016	0.002	0.004	0.003	0.001	0.001	0.002	0.008	0.003	0.007	285.613	0.882
2011001	10000	13	52	0.002	0.017	0.002	0.004	0.003	0.001	0.001	0.002	0.008	0.004	0.007	285.432	0.887
2011001	10000	13	53	0.003	0.018	0.002	0.004	0.002	0.001	0.001	0.002	0.007	0.006	0.008	285.349	0.893
2011001	10000	13	54	0.003	0.019	0.002	0.004	0.002	0.001	0.001	0.002	0.007	0.007	0.009	285.23	0.891
2011001	10000	13	55	0.003	0.022	0.002	0.003	0.002	0.001	0.001	0.002	0.007	0.008	0.009	285.098	0.886
2011001	10000	13	56	0.003	0.026	0.003	0.003	0.002	0.001	0.001	0.002	0.007	0.009	0.01	285.031	0.893
2011001	10000	13	57	0.004	0.028	0.003	0.003	0.002	0.001	0.001	0.002	0.007	0.014	0.011	284.926	0.899
2011001	10000	13	58	0.005	0.032	0.003	0.003	0.002	0.001	0.001	0.003	0.007	0.02	0.015	284.798	0.904
2011001	10000	13	59	0.007	0.029	0.002	0.003	0.002	0.001	0	0.003	0.008	0.027	0.016	284.628	0.904
2011001	10000	13	60	0.008	0.024	0.001	0.002	0.001	0.001	0	0.002	0.008	0.03	0.016	284.214	0.916
2011001	10000	13	61	0.006	0.021	0.001	0.002	0.001	0.001	0	0.002	0.007	0.019	0.012	283.857	0.926
2011001	10000	13	62	0.004	0.019	0.001	0.002	0.001	0	0	0.001	0.007	0.004	0.008	283.695	0.929
2011001	10000	13	63	0.004	0.015	0.002	0.002	0.001	0	0	0.001	0.007	0.004	0.008	283.797	0.923
2011001	10000	13	64	0.004	0.013	0.002	0.002	0.001	0	0	0.001	0.006	0.003	0.008	283.763	0.914
2011001	10000	13	65	0.004	0.012	0.002	0.002	0.001	0	0	0.001	0.007	0.002	0.008	283.767	0.9
2011001	10000	13	66	0.004	0.012	0.002	0.002	0.001	0	0	0.001	0.007	0.001	0.007	283.916	0.89
2011001	10000	13	67	0.003	0.013	0.002	0.002	0.001	0	0	0.001	0.007	0.002	0.008	284.027	0.888
2011001	10000	13	68	0.003	0.011	0.002	0.002	0.001	0	0	0.001	0.007	0.002	0.008	283.592	0.88
2011001	10000	13	69	0.003	0.01	0.003	0.002	0.002	0	0	0.001	0.007	0.001	0.008	283.608	0.856
2011001	10000	13	70	0.003	0.009	0.006	0.002	0.002	0.001	0	0.001	0.007	0.002	0.008	283.315	0.872
2011001	10000	13	71	0.003	0.008	0.002	0.002	0.002	0	0	0.001	0.007	0.001	0.006	283.092	0.895
2011001	10000	13	72	0.002	0.007	0.001	0.003	0.002	0	0	0.001	0.007	0.001	0.005	283.405	0.902
2011001	10000	13	73	0.002	0.006	0.001	0.003	0.002	0	0	0.001	0.007	0.001	0.005	283.68	0.902
2011001	10000	13	74	0.001	0.006	0.001	0.003	0.002	0	0	0.001	0.007	0	0.005	283.908	0.896
2011001	10000	13	75	0.001	0.006	0.001	0.003	0.002	0.001	0	0.001	0.007	0	0.005	283.736	0.902
2011001	10000	13	76	0.001	0.006	0.001	0.003	0.001	0	0	0.001	0.007	0	0.005	283.329	0.9
2011001	10000	13	77	0.001	0.006	0	0.003	0.001	0	0	0.001	0.007	0.001	0.005	282.974	0.882
2011001	10000	13	78	0.001	0.006	0	0.003	0.001	0	0	0.001	0.007	0.001	0.005	282.752	0.87
2011001	10000	13	79	0.001	0.005	0	0.003	0.001	0	0	0.001	0.008	0.001	0.005	282.588	0.875
2011001	10000	13	80	0.001	0.005	0	0.003	0.001	0	0.001	0.001	0.008	0.001	0.005	282.48	0.884
2011001	10000	13	81	0.001	0.005	0	0.004	0.001	0	0.001	0.001	0.008	0.001	0.005	282.39	0.893
2011001	10000	13	82	0.001	0.005	0	0.004	0.001	0	0.001	0.001	0.008	0.001	0.005	282.244	0.9
2011001	10000	13	83	0.001	0.006	0	0.004	0.001	0	0.001	0.001	0.008	0.001	0.005	282.167	0.902
2011001	10000	13	84	0.001	0.006	0	0.004	0.001	0	0.001	0.001	0.009	0.001	0.005	282.073	0.905
2011001	10000	13	85	0	0.005	0	0.004	0.001	0	0.001	0.001	0.009	0.001	0.006	281.923	0.909
2011001	10000	13	86	0	0.005	0	0.005	0.001	0	0.001	0	0.009	0.001	0.006	281.815	0.911
2011001	10000	13	87	0.001	0.005	0	0.005	0.001	0	0.001	0	0.009	0.001	0.006	281.743	0.91
2011001	10000	13	88	0.001	0.004	0	0.005	0.001	0	0.001	0	0.009	0	0.006	281.634	0.91
2011001	10000	13	89	0.001	0.004	0	0.005	0.001	0	0.001	0	0.009	0	0.006	281.531	0.913
2011001	10000	13	90	0.001	0.004	0	0.004	0.001	0	0.001	0	0.009	0	0.006	281.458	0.914
2011001	10000	13	91	0.001	0.005	0	0.004	0.001	0	0.001	0	0.009	0.001	0.006	281.328	0.913
2011001	10000	13	92	0.001	0.005	0	0.005	0.001	0	0.001	0	0.009	0.001	0.006	281.26	0.911
2011001	10000	13	93	0.002	0.005	0	0.005	0.001	0	0.001	0	0.009	0.001	0.006	281.156	0.911
2011001	10000	13	94	0.001	0.005	0	0.005	0.001	0	0.001	0	0.009	0.001	0.006	281.026	0.91
2011001	10000	13	95	0.001	0.006	0	0.005	0.001	0	0.001	0	0.009	0.001	0.006	280.969	0.906
2011001	10000	13	96	0.003	0.006	0	0.005	0.001	0	0.001	0	0.009	0.001	0.006	280.928	0.904
2011001	10000	13	97	0.002	0.006	0	0.004	0.001	0	0.001	0	0.009	0	0.006	280.746	0.901
2011001	10000	13	98	0.002	0.006	0	0.005	0.001	0	0.001	0	0.009	0	0.006	280.584	0.897
2011001	10000	13	99	0.001	0.006	0	0.005	0.001	0	0.001	0	0.01	0	0.006	280.388	0.894
2011001	10000	13	100	0.001	0.006	0	0.005	0.001	0	0.001	0	0.009	0	0.006	280.115	0.892
2011001	10000	13	101	0.001	0.005	0	0.005	0.001	0	0.001	0	0.009	0	0.005	279.732	0.894
2011001	10000	13	102	0.001	0.004	0	0.005	0.002	0	0.001	0	0.009	0	0.005	279.307	0.896
2011001	10000	13	103	0.001	0.003	0	0.005	0.002	0	0.001	0	0.008	0	0.004	279.005	0.894
2011001	10000	13	104	0.001	0.003	0	0.005	0.002	0	0.001	0	0.008	0	0.004	278.968	0.89
2011001	10000	13	105	0.001	0.003	0	0.005	0.002	0	0.001	0	0.008	0	0.004	279.249	0.874
2011001	10000	13	106	0.001	0.002	0	0.005	0.002	0	0.001	0	0.008	0	0.004	279.597	0.858
2011001	10000	13	107	0.001	0.002	0	0.005	0.002	0	0.001	0	0.008	0	0.004	279.759	0.849
2011001	10000	13	108	0.001	0.002	0	0.005	0.002	0	0.001	0	0.008	0	0.004	279.5	0.839
2011001	10000	13	109	0.002	0.002	0	0.005	0.002	0	0.001	0	0.007	0	0.004	279.234	0.828
2011001	10000	13	110	0.002	0.002	0	0.004	0.002	0	0.001	0	0.007	0	0.004	279.126	0.815
2011001	10000	13	111	0.003	0.002	0	0.004	0.002	0	0.001	0	0.007	0	0.003	279.043	0.808
2011001	10000	13	112	0.004	0.002	0	0.004	0.002	0	0	0	0.007	0	0.003	279.051	0.808
2011001	10000	14	1	0	0.002	0	0.002	0.001	0	0	0	0.005	0	0.003	291.602	0.843
2011001	10000	14	2	0	0.002	0	0.002	0.001	0	0	0	0.005	0	0.003	291.363	0.841
2011001	10000	14	3	0	0.002	0	0.002	0.001	0	0	0	0.004	0	0.003	291.163	0.842
2011001	10000	14	4	0	0.003	0	0.002	0.001	0	0	0	0.004	0	0.003	290.974	0.841
2011001	10000	14	5	0	0.003	0	0.002	0.001	0	0	0	0.004	0	0.003	290.788	0.842
2011001	10000	14	6	0	0.002	0	0.002	0.001	0	0	0	0.004	0	0.003	290.598	0.844
2011001	10000	14	7	0	0.002	0	0.002	0.001	0	0	0	0.004	0	0.003	290.406	0.847
2011001	10000	14	8	0	0.002	0	0.002	0.001	0	0	0	0.004	0	0.003	290.283	0.848
2011001	10000	14	9	0	0.002	0	0.002	0.001	0	0	0	0.004	0	0.003	290.102	0.851
2011001	10000	14	10	0	0.003	0	0.002	0.001	0	0	0	0.004	0	0.003	289.991	0.853
2011001	10000	14	11	0	0.003	0	0.002	0.001	0	0	0	0.004	0	0.003	289.858	0.855
2011001	10000	14	12	0	0.003	0	0.002	0.001	0	0	0	0.004	0	0.003	289.764	0.859
2011001	10000	14	13	0	0.003	0	0.002	0.001	0	0	0	0.004	0	0.003	289.579	0.865
2011001	10000	14	14	0	0.003	0	0.002	0.001	0	0	0	0.004	0	0.003	289.415	0.87
2011001	10000	14	15	0	0.003	0	0.002	0.001	0	0	0	0.004	0	0.003	289.202	0.882
2011001	10000	14	16	0	0.003	0	0.002	0.001	0	0	0	0.004	0	0.003	289.012	0.89
2011001	10000	14	17	0	0.003	0.001	0.002	0.001	0	0	0	0.004	0	0.004	288.912	0.89
2011001	10000	14	18	0	0.003	0.001	0.002	0.001	0	0	0	0.004	0	0.004	288.7	0.895
2011001	10000	14	19	0	0.003	0.001	0.002	0.001	0	0	0	0.005	0	0.004	288.573	0.896
2011001	10000	14	20	0	0.003	0.001	0.002	0.001	0	0	0	0.005	0	0.004	288.4	0.897
2011001	10000	14	21	0	0.003	0.001	0.002	0.001	0	0	0	0.005	0	0.004	288.236	0.899
2011001	10000	14	22	0	0.003	0.001	0.002	0.001	0	0	0	0.005	0	0.004	288.16	0.896
2011001	10000	14	23	0	0.004	0.001	0.002	0.001	0	0	0	0.006	0	0.004	288.012	0.897
2011001	10000	14	24	0	0.004	0.001	0.003	0.001	0	0	0	0.006	0	0.004	287.901	0.899
2011001	10000	14	25	0	0.004	0.001	0.003	0.001	0	0	0	0.006	0	0.004	287.777	0.9
2011001	10000	14	26	0	0.004	0.001	0.003	0.001	0	0	0	0.006	0	0.004	287.71	0.899
2011001	10000	14	27	0	0.004	0	0.003	0.001	0	0	0	0.006	0	0.004	287.635	0.9
2011001	10000	14	28	0	0.004	0	0.003	0.001	0	0	0	0.006	0	0.004	287.517	0.9
2011001	10000	14	29	0	0.004	0	0.003	0.001	0	0	0	0.006	0	0.004	287.454	0.9
2011001	10000	14	30	0	0.004	0	0.003	0.001	0	0	0	0.006	0	0.004	287.276	0.905
2011001	10000	14	31	0	0.004	0	0.004	0.001	0	0	0	0.007	0.001	0.004	287.2	0.906
2011001	10000	14	32	0	0.004	0	0.004	0.001	0	0.001	0	0.007	0.001	0.004	287.153	0.909
2011001	10000	14	33	0	0.005	0	0.005	0.001	0	0.001	0.001	0.008	0.001	0.005	287.138	0.912
2011001	10000	14	34	0	0.006	0	0.005	0.002	0	0.001	0.001	0.008	0.001	0.005	287.159	0.915
2011001	10000	14	35	0	0.006	0	0.005	0.002	0	0.001	0.001	0.009	0.001	0.005	287.155	0.917
2011001	10000	14	36	0.001	0.007	0.001	0.006	0.002	0	0.001	0.001	0.008	0.001	0.005	287.163	0.916
2011001	10000	14	37	0.001	0.007	0.001	0.006	0.002	0	0.001	0.001	0.008	0.001	0.005	287.137	0.915
2011001	10000	14	38	0.001	0.008	0.001	0.006	0.002	0	0.001	0.001	0.008	0.001	0.005	287.019	0.918
2011001	10000	14	39	0.001	0.009	0.001	0.006	0.002	0	0.001	0.001	0.008	0.002	0.005	287.072	0.908
2011001	10000	14	40	0.001	0.009	0.001	0.006	0.003	0	0.001	0.001	0.008	0.002	0.005	286.976	0.905
2011001	10000	14	41	0.001	0.01	0.001	0.006	0.003	0	0.001	0.001	0.008	0.002	0.005	286.859	0.902
2011001	10000	14	42	0.002	0.011	0.001	0.006	0.003	0	0.001	0.001	0.008	0.002	0.005	286.809	0.897
2011001	10000	14	43	0.002	0.011	0.001	0.006	0.003	0	0.001	0.001	0.008	0.002	0.005	286.625	0.896
2011001	10000	14	44	0.002	0.011	0.001	0.006	0.003	0	0.001	0.001	0.008	0.001	0.005	286.517	0.894
2011001	10000	14	45	0.002	0.011	0.001	0.005	0.003	0	0.001	0.001	0.008	0.002	0.005	286.354	0.894
2011001	10000	14	46	0.002	0.011	0.001	0.005	0.003	0.001	0.001	0.001	0.008	0.002	0.005	286.18	0.893
2011001	10000	14	47	0.002	0.014	0.001	0.005	0.003	0.001	0.001	0.001	0.008	0.002	0.005	286.025	0.893
2011001	10000	14	48	0.003	0.016	0.001	0.005	0.003	0.001	0.001	0.002	0.008	0.002	0.006	285.768	0.889
2011001	10000	14	49	0.003	0.017	0.002	0.005	0.003	0.001	0.001	0.002	0.008	0.002	0.007	285.573	0.887
2011001	10000	14	50	0.003	0.018	0.002	0.004	0.003	0.001	0.001	0.002	0.008	0.003	0.007	285.491	0.883
2011001	10000	14	51	0.003	0.019	0.002	0.004	0.003	0.001	0.001	0.002	0.008	0.003	0.008	285.433	0.88
2011001	10000	14	52	0.003	0.021	0.003	0.004	0.003	0.001	0.001	0.002	0.008	0.004	0.009	285.445	0.881
2011001	10000	14	53	0.004	0.022	0.003	0.003	0.003	0.001	0.001	0.002	0.008	0.005	0.01	285.298	0.883
2011001	10000	14	54	0.005	0.026	0.004	0.003	0.003	0.001	0.001	0.002	0.008	0.007	0.011	285.216	0.875
2011001	10000	14	55	0.006	0.029	0.004	0.003	0.003	0.001	0.001	0.003	0.008	0.009	0.013	285.172	0.865
2011001	10000	14	56	0.006	0.033	0.005	0.003	0.003	0.001	0.001	0.003	0.008	0.014	0.016	285.077	0.868
2011001	10000	14	57	0.007	0.035	0.005	0.002	0.003	0.001	0.001	0.004	0.008	0.021	0.02	285.134	0.879
2011001	10000	14	58	0.008	0.035	0.005	0.002	0.003	0.001	0.001	0.004	0.008	0.036	0.028	285.129	0.886
2011001	10000	14	59	0.009	0.033	0.004	0.002	0.003	0.002	0.001	0.006	0.008	0.047	0.035	284.866	0.88
2011001	10000	14	60	0.011	0.024	0.004	0.002	0.002	0.002	0.001	0.006	0.008	0.045	0.027	284.263	0.899
2011001	10000	14	61	0.006	0.023	0.002	0.002	0.002	0.001	0	0.003	0.007	0.027	0.019	283.609	0.925
2011001	10000	14	62	0.004	0.019	0.006	0.002	0.002	0.001	0	0.003	0.007	0.025	0.023	283.56	0.919
2011001	10000	14	63	0.003	0.016	0.009	0.001	0.002	0.001	0	0.002	0.006	0.015	0.019	283.729	0.892
2011001	10000	14	64	0.002	0.008	0.007	0.001	0.001	0.001	0	0.002	0.006	0.01	0.016	282.12	0.881
2011001	10000	14	65	0.002	0.007	0.011	0.001	0.001	0.001	0	0.001	0.006	0.007	0.014	282.424	0.83
2011001	10000	14	66	0.003	0.006	0.01	0.001	0.001	0.001	0	0.001	0.006	0.004	0.012	282.748	0.816
2011001	10000	14	67	0.002	0.009	0.005	0.001	0.001	0	0	0.001	0.006	0.003	0.01	283.38	0.746
2011001	10000	14	68	0.001	0.006	0.004	0.001	0.001	0	0	0.001	0.006	0.002	0.009	281.845	0.84
2011001	10000	14	69	0.001	0.006	0.01	0.001	0.001	0.001	0	0.001	0.006	0.002	0.009	281.536	0.8
2011001	10000	14	70	0.002	0.004	0.069	0.001	0.002	0.002	0.001	0.003	0.007	0.007	0.012	280.825	0.826
2011001	10000	14	71	0.002	0.007	0.019	0.001	0.002	0.001	0	0.002	0.007	0.004	0.01	283.405	0.836
2011001	10000	14	72	0.002	0.008	0.004	0.002	0.002	0.001	0	0.001	0.007	0.001	0.007	283.885	0.867
2011001	10000	14	73	0.002	0.008	0.006	0.002	0.002	0.001	0.001	0.002	0.007	0.001	0.006	284.225	0.87
2011001	10000	14	74	0.002	0.007	0.006	0.002	0.003	0.001	0.001	0.002	0.007	0.001	0.006	284.462	0.871
2011001	10000	14	75	0.002	0.008	0.002	0.002	0.002	0.001	0.001	0.002	0.008	0.001	0.005	284.287	0.875
2011001	10000	14	76	0.002	0.008	0.001	0.002	0.002	0.001	0	0.001	0.008	0.001	0.005	283.523	0.881
2011001	10000	14	77	0.002	0.008	0.001	0.002	0.002	0.001	0	0.001	0.008	0.001	0.005	283.116	0.844
2011001	10000	14	78	0.002	0.007	0.001	0.003	0.002	0.001	0.001	0.001	0.008	0.002	0.005	282.929	0.817
2011001	10000	14	79	0.001	0.007	0	0.003	0.002	0.001	0	0.001	0.008	0.001	0.005	282.734	0.83
2011001	10000	14	80	0.001	0.006	0	0.003	0.002	0.001	0.001	0.001	0.008	0.001	0.005	282.571	0.863
2011001	10000	14	81	0.001	0.006	0	0.004	0.002	0	0.001	0.001	0.008	0.002	0.005	282.443	0.884
2011001	10000	14	82	0.001	0.005	0	0.004	0.002	0	0.001	0.001	0.008	0.002	0.005	282.339	0.894
2011001	10000	14	83	0.001	0.006	0	0.004	0.002	0	0.001	0.001	0.008	0.002	0.005	282.21	0.898
2011001	10000	14	84	0.001	0.007	0	0.004	0.001	0	0.001	0.001	0.008	0.001	0.005	282.034	0.9
2011001	10000	14	85	0.001	0.006	0	0.004	0.001	0	0.001	0.001	0.008	0.001	0.005	281.901	0.904
2011001	10000	14	86	0.001	0.006	0.001	0.005	0.001	0	0.001	0	0.009	0.001	0.006	281.79	0.907
2011001	10000	14	87	0.001	0.006	0.001	0.005	0.001	0	0.001	0	0.009	0.001	0.006	281.651	0.908
2011001	10000	14	88	0.001	0.005	0.001	0.005	0.001	0	0.001	0	0.009	0.001	0.006	281.563	0.908
2011001	10000	14	89	0.001	0.005	0	0.005	0.001	0	0.001	0	0.009	0.001	0.006	281.507	0.908
2011001	10000	14	90	0.001	0.005	0	0.004	0.001	0	0.001	0	0.009	0.001	0.006	281.374	0.909
2011001	10000	14	91	0.001	0.006	0	0.004	0.001	0	0.001	0	0.009	0.001	0.006	281.322	0.907
2011001	10000	14	92	0.001	0.006	0	0.005	0.001	0	0.001	0	0.009	0.001	0.006	281.193	0.909
2011001	10000	14	93	0.001	0.006	0	0.005	0.001	0	0.001	0	0.009	0.001	0.006	281.074	0.906
2011001	10000	14	94	0.001	0.006	0	0.005	0.001	0	0.001	0	0.009	0.001	0.006	281.038	0.906
2011001	10000	14	95	0.002	0.006	0	0.005	0.001	0	0.001	0	0.009	0.001	0.005	281.016	0.905
2011001	10000	14	96	0.003	0.006	0	0.005	0.001	0	0.001	0	0.009	0	0.005	280.914	0.906
2011001	10000	14	97	0.002	0.006	0	0.005	0.001	0	0.001	0	0.009	0	0.005	280.83	0.902
2011001	10000	14	98	0.002	0.005	0	0.005	0.001	0	0.001	0	0.009	0	0.005	280.54	0.899
2011001	10000	14	99	0.001	0.006	0	0.004	0.001	0	0.001	0	0.009	0	0.005	280.295	0.895
2011001	10000	14	100	0.001	0.005	0	0.004	0.001	0	0.001	0	0.009	0	0.005	280.047	0.894
2011001	10000	14	101	0.001	0.005	0	0.004	0.001	0	0.001	0	0.008	0	0.005	279.627	0.895
2011001	10000	14	102	0.001	0.004	0	0.005	0.002	0	0.001	0	0.008	0	0.005	279.133	0.896
2011001	10000	14	103	0.001	0.003	0	0.005	0.002	0	0.001	0	0.008	0	0.004	278.84	0.898
2011001	10000	14	104	0.001	0.003	0	0.005	0.002	0	0.001	0	0.008	0	0.004	278.883	0.889
2011001	10000	14	105	0.001	0.003	0	0.005	0.002	0	0.001	0	0.008	0	0.004	279.217	0.872
2011001	10000	14	106	0.001	0.003	0	0.005	0.002	0	0.001	0	0.008	0	0.004	279.64	0.854
2011001	10000	14	107	0.001	0.002	0	0.005	0.002	0	0.001	0	0.007	0	0.004	279.783	0.839
2011001	10000	14	108	0.002	0.002	0	0.005	0.002	0	0.001	0	0.007	0	0.004	279.567	0.827
2011001	10000	14	109	0.003	0.002	0	0.005	0.002	0	0.001	0	0.007	0	0.003	279.289	0.821
2011001	10000	14	110	0.003	0.002	0	0.004	0.002	0	0.001	0	0.007	0	0.003	279.011	0.814
2011001	10000	14	111	0.004	0.002	0	0.004	0.002	0	0.001	0	0.006	0	0.003	278.861	0.813
2011001	10000	14	112	0.006	0.002	0	0.004	0.002	0	0	0	0.006	0	0.003	278.93	0.806
2011001	10000	15	1	0	0.002	0	0.002	0.001	0	0	0	0.005	0	0.003	291.495	0.843
2011001	10000	15	2	0	0.002	0	0.002	0.001	0	0	0	0.005	0	0.003	291.313	0.841
2011001	10000	15	3	0	0.002	0	0.002	0.001	0	0	0	0.004	0	0.003	291.11	0.844
2011001	10000	15	4	0	0.002	0	0.002	0.001	0	0	0	0.004	0	0.003	290.879	0.847
2011001	10000	15	5	0	0.003	0	0.002	0.001	0	0	0	0.004	0	0.003	290.688	0.845
2011001	10000	15	6	0	0.003	0	0.002	0.001	0	0	0	0.004	0	0.003	290.503	0.846
2011001	10000	15	7	0	0.003	0	0.002	0.001	0	0	0	0.004	0	0.003	290.313	0.849
2011001	10000	15	8	0	0.002	0	0.002	0.001	0	0	0	0.004	0	0.003	290.165	0.853
2011001	10000	15	9	0	0.003	0	0.002	0.001	0	0	0	0.004	0	0.003	290.03	0.855
2011001	10000	15	10	0	0.003	0	0.002	0.001	0	0	0	0.004	0	0.003	289.877	0.859
2011001	10000	15	11	0	0.003	0	0.002	0.001	0	0	0	0.004	0	0.003	289.743	0.86
2011001	10000	15	12	0	0.003	0	0.002	0.001	0	0	0	0.004	0	0.003	289.639	0.862
2011001	10000	15	13	0	0.003	0	0.002	0.001	0	0	0	0.004	0	0.003	289.446	0.874
2011001	10000	15	14	0	0.003	0	0.002	0.001	0	0	0	0.004	0	0.003	289.265	0.879
2011001	10000	15	15	0	0.003	0	0.002	0.001	0	0	0	0.004	0	0.003	289.055	0.892
2011001	10000	15	16	0	0.003	0.001	0.002	0.001	0	0	0	0.004	0	0.003	288.888	0.896
2011001	10000	15	17	0	0.003	0.001	0.002	0.001	0	0	0	0.004	0	0.003	288.79	0.893
2011001	10000	15	18	0	0.003	0.001	0.002	0.001	0	0	0	0.004	0	0.003	288.624	0.897
2011001	10000	15	19	0	0.003	0.001	0.002	0.001	0	0	0	0.005	0	0.004	288.467	0.898
2011001	10000	15	20	0	0.003	0.001	0.002	0.001	0	0	0	0.005	0	0.004	288.282	0.9
2011001	10000	15	21	0	0.003	0.001	0.002	0.001	0	0	0	0.005	0	0.004	288.185	0.901
2011001	10000	15	22	0	0.004	0.001	0.002	0.001	0	0	0	0.005	0	0.004	288.046	0.9
2011001	10000	15	23	0	0.004	0.001	0.002	0.001	0	0	0	0.005	0	0.004	287.951	0.9
2011001	10000	15	24	0	0.004	0.001	0.002	0.001	0	0	0	0.006	0	0.004	287.762	0.904
2011001	10000	15	25	0	0.004	0	0.002	0.001	0	0	0	0.006	0	0.004	287.673	0.903
2011001	10000	15	26	0	0.004	0	0.003	0.001	0	0	0	0.006	0	0.004	287.603	0.903
2011001	10000	15	27	0	0.004	0	0.003	0.001	0	0	0	0.006	0	0.004	287.492	0.904
2011001	10000	15	28	0	0.004	0	0.003	0.001	0	0	0	0.006	0	0.004	287.405	0.904
2011001	10000	15	29	0	0.004	0	0.003	0.001	0	0	0	0.006	0	0.004	287.307	0.907
2011001	10000	15	30	0	0.004	0	0.003	0.001	0	0	0	0.006	0.001	0.004	287.216	0.906
2011001	10000	15	31	0	0.004	0.001	0.004	0.001	0	0	0	0.007	0.001	0.004	287.139	0.908
2011001	10000	15	32	0	0.005	0	0.004	0.001	0	0.001	0.001	0.007	0.001	0.005	287.086	0.911
2011001	10000	15	33	0	0.005	0	0.005	0.001	0	0.001	0.001	0.008	0.001	0.005	287.12	0.914
2011001	10000	15	34	0	0.006	0	0.005	0.002	0	0.001	0.001	0.008	0.001	0.005	287.122	0.915
2011001	10000	15	35	0.001	0.007	0.001	0.005	0.002	0	0.001	0.001	0.008	0.001	0.005	287.139	0.914
2011001	10000	15	36	0.001	0.008	0.001	0.005	0.002	0	0.001	0.001	0.008	0.001	0.005	287.118	0.915
2011001	10000	15	37	0.001	0.008	0.001	0.006	0.002	0	0.001	0.001	0.008	0.001	0.005	287.074	0.915
2011001	10000	15	38	0.001	0.008	0.001	0.006	0.002	0	0.001	0.001	0.008	0.001	0.005	287.019	0.917
2011001	10000	15	39	0.001	0.009	0.001	0.006	0.002	0	0.001	0.001	0.008	0.002	0.005	286.954	0.911
2011001	10000	15	40	0.001	0.01	0.001	0.006	0.003	0	0.001	0.001	0.008	0.002	0.005	286.871	0.907
2011001	10000	15	41	0.002	0.012	0.001	0.006	0.003	0.001	0.001	0.001	0.008	0.002	0.005	286.851	0.902
2011001	10000	15	42	0.002	0.013	0.001	0.006	0.003	0.001	0.001	0.001	0.008	0.002	0.005	286.693	0.897
2011001	10000	15	43	0.002	0.013	0.001	0.006	0.003	0.001	0.001	0.001	0.008	0.002	0.005	286.546	0.892
2011001	10000	15	44	0.003	0.014	0.001	0.005	0.003	0.001	0.001	0.001	0.008	0.002	0.005	286.394	0.889
2011001	10000	15	45	0.002	0.014	0.001	0.005	0.003	0.001	0.001	0.001	0.008	0.002	0.005	286.233	0.889
2011001	10000	15	46	0.002	0.015	0.002	0.005	0.003	0.001	0.001	0.001	0.008	0.002	0.006	286.098	0.899
2011001	10000	15	47	0.003	0.018	0.002	0.005	0.003	0.001	0.001	0.002	0.008	0.002	0.006	285.86	0.904
2011001	10000	15	48	0.004	0.019	0.002	0.004	0.003	0.001	0.001	0.002	0.008	0.002	0.007	285.54	0.906
2011001	10000	15	49	0.005	0.021	0.002	0.004	0.003	0.001	0.001	0.002	0.008	0.003	0.007	285.306	0.9
2011001	10000	15	50	0.005	0.021	0.002	0.004	0.003	0.001	0.001	0.002	0.008	0.003	0.008	285.213	0.891
2011001	10000	15	51	0.006	0.023	0.003	0.003	0.003	0.001	0.001	0.002	0.008	0.005	0.009	285.297	0.885
2011001	10000	15	52	0.006	0.023	0.005	0.003	0.003	0.001	0.001	0.002	0.008	0.005	0.01	285.403	0.877
2011001	10000	15	53	0.005	0.024	0.006	0.003	0.003	0.001	0.001	0.003	0.008	0.007	0.012	285.466	0.865
2011001	10000	15	54	0.005	0.027	0.008	0.002	0.003	0.001	0.001	0.003	0.008	0.009	0.014	285.41	0.842
2011001	10000	15	55	0.005	0.03	0.008	0.002	0.003	0.001	0.001	0.003	0.008	0.014	0.018	284.86	0.828
2011001	10000	15	56	0.005	0.037	0.011	0.002	0.004	0.001	0.001	0.005	0.009	0.026	0.029	284.8	0.843
2011001	10000	15	57	0.005	0.04	0.011	0.002	0.004	0.002	0.001	0.006	0.009	0.038	0.039	285.24	0.854
2011001	10000	15	58	0.008	0.033	0.013	0.002	0.004	0.003	0.001	0.009	0.009	0.065	0.055	285.79	0.783
2011001	10000	15	59	0.012	0.02	0.026	0.002	0.005	0.004	0.001	0.014	0.01	0.083	0.067	285.668	0.754
2011001	10000	15	60	0.016	0.011	0.081	0.002	0.005	0.007	0.002	0.029	0.012	0.084	0.05	284.403	0.869
2011001	10000	15	61	0.011	0.008	0.035	0.002	0.004	0.003	0.001	0.009	0.009	0.06	0.055	281.77	0.916
2011001	10000	15	62	0.005	0.005	0.099	0.002	0.004	0.004	0.001	0.01	0.008	0.053	0.046	281.718	0.891
2011001	10000	15	63	0.002	0.006	0.041	0.001	0.002	0.001	0	0.003	0.006	0.026	0.03	281.638	0.858
2011001	10000	15	64	0.003	0.007	0.021	0.001	0.001	0.001	0	0.001	0.005	0.013	0.019	281.508	0.806
2011001	10000	15	65	0.003	0.006	0.025	0.001	0.001	0.001	0	0.001	0.005	0.008	0.015	281.041	0.802
2011001	10000	15	66	0.002	0.006	0.01	0	0.001	0	0	0.001	0.005	0.003	0.01	280.529	0.797
2011001	10000	15	67	0.001	0.006	0.004	0	0.001	0	0	0.001	0.005	0.001	0.008	280.211	0.768
2011001	10000	15	68	0.001	0.005	0.004	0	0.001	0	0	0	0.005	0.001	0.008	280.546	0.77
2011001	10000	15	69	0.001	0.006	0.006	0	0.001	0	0	0	0.005	0.001	0.009	279.458	0.758
2011001	10000	15	70	0.001	0.005	0.01	0.001	0.001	0	0	0.001	0.005	0.002	0.01	280.126	0.771
2011001	10000	15	71	0.001	0.004	0.011	0.001	0.001	0.001	0	0.001	0.006	0.001	0.009	280.69	0.791
2011001	10000	15	72	0.001	0.006	0.011	0.001	0.002	0.001	0	0.001	0.006	0.001	0.007	283.437	0.796
2011001	10000	15	73	0.002	0.004	0.037	0.001	0.003	0.001	0.001	0.004	0.006	0.003	0.007	284.342	0.815
2011001	10000	15	74	0.002	0.004	0.038	0.002	0.004	0.002	0.001	0.005	0.007	0.004	0.006	283.578	0.823
2011001	10000	15	75	0.002	0.005	0.009	0.002	0.003	0.002	0.001	0.004	0.007	0.003	0.005	283.475	0.825
2011001	10000	15	76	0.002	0.007	0.004	0.002	0.002	0.001	0.001	0.003	0.007	0.001	0.005	283.367	0.845
2011001	10000	15	77	0.003	0.008	0.003	0.002	0.002	0.001	0.001	0.003	0.007	0.001	0.005	282.989	0.787
2011001	10000	15	78	0.003	0.008	0.002	0.002	0.002	0.001	0.001	0.003	0.008	0.002	0.005	282.995	0.761
2011001	10000	15	79	0.003	0.008	0.001	0.003	0.002	0.001	0.001	0.001	0.008	0.001	0.005	282.871	0.783
2011001	10000	15	80	0.002	0.008	0.001	0.003	0.002	0.001	0.001	0.001	0.008	0.002	0.005	282.677	0.836
2011001	10000	15	81	0.002	0.007	0	0.003	0.002	0.001	0.001	0.001	0.008	0.002	0.005	282.542	0.877
2011001	10000	15	82	0.001	0.006	0	0.004	0.002	0.001	0.001	0.001	0.008	0.003	0.005	282.448	0.893
2011001	10000	15	83	0.001	0.006	0.001	0.004	0.002	0.001	0.001	0.001	0.008	0.002	0.005	282.285	0.9
2011001	10000	15	84	0.001	0.007	0.001	0.004	0.001	0	0.001	0.001	0.008	0.001	0.005	282.073	0.903
2011001	10000	15	85	0.001	0.007	0.001	0.004	0.001	0	0.001	0.001	0.008	0.001	0.005	281.904	0.904
2011001	10000	15	86	0.001	0.007	0.001	0.004	0.001	0	0.001	0	0.009	0.001	0.006	281.734	0.902
2011001	10000	15	87	0.001	0.007	0.001	0.004	0.001	0	0.001	0	0.009	0.001	0.006	281.6	0.904
2011001	10000	15	88	0.001	0.007	0.001	0.005	0.001	0	0.001	0	0.009	0.001	0.006	281.515	0.904
2011001	10000	15	89	0.001	0.006	0.001	0.004	0.001	0	0.001	0	0.009	0.001	0.006	281.394	0.906
2011001	10000	15	90	0.001	0.006	0.001	0.004	0.001	0	0.001	0	0.009	0.001	0.006	281.328	0.907
2011001	10000	15	91	0.002	0.007	0	0.004	0.001	0	0.001	0	0.009	0.001	0.006	281.24	0.907
2011001	10000	15	92	0.001	0.007	0	0.005	0.001	0	0.001	0	0.009	0.001	0.006	281.123	0.904
2011001	10000	15	93	0.001	0.006	0	0.005	0.001	0	0.001	0	0.009	0.001	0.006	281.102	0.906
2011001	10000	15	94	0.001	0.006	0	0.005	0.001	0	0.001	0	0.009	0.001	0.006	281.107	0.907
2011001	10000	15	95	0.003	0.006	0	0.005	0.001	0	0.001	0	0.009	0	0.005	281.146	0.909
2011001	10000	15	96	0.003	0.006	0	0.004	0.001	0	0.001	0	0.008	0	0.005	281.127	0.911
2011001	10000	15	97	0.002	0.006	0	0.004	0.001	0	0.001	0	0.008	0	0.005	280.843	0.909
2011001	10000	15	98	0.001	0.005	0	0.004	0.001	0	0.001	0	0.008	0	0.005	280.55	0.902
2011001	10000	15	99	0.001	0.005	0	0.004	0.001	0	0	0	0.008	0	0.005	280.39	0.894
2011001	10000	15	100	0.001	0.005	0	0.004	0.001	0	0	0	0.008	0	0.004	280.15	0.885
2011001	10000	15	101	0.002	0.004	0	0.004	0.001	0	0	0	0.007	0	0.004	279.766	0.88
2011001	10000	15	102	0.002	0.004	0	0.004	0.001	0	0	0	0.007	0	0.004	278.252	0.902
2011001	10000	15	103	0.002	0.004	0	0.004	0.001	0	0.001	0	0.007	0	0.004	278.576	0.893
2011001	10000	15	104	0.001	0.004	0	0.004	0.002	0	0.001	0	0.007	0	0.004	278.962	0.878
2011001	10000	15	105	0.001	0.003	0	0.004	0.002	0	0.001	0	0.007	0	0.004	279.442	0.858
2011001	10000	15	106	0.002	0.003	0	0.005	0.002	0	0.001	0	0.007	0	0.004	279.709	0.834
2011001	10000	15	107	0.002	0.002	0	0.004	0.002	0	0.001	0	0.007	0	0.003	279.787	0.823
2011001	10000	15	108	0.002	0.002	0	0.004	0.002	0	0.001	0	0.006	0	0.003	279.625	0.815
2011001	10000	15	109	0.002	0.002	0	0.004	0.002	0	0	0	0.006	0	0.003	279.14	0.808
2011001	10000	15	110	0.002	0.002	0	0.004	0.002	0	0	0	0.006	0	0.003	278.863	0.809
2011001	10000	15	111	0.004	0.001	0	0.004	0.002	0	0	0	0.006	0	0.003	277.121	0.84
2011001	10000	15	112	0.007	0.001	0	0.002	0.001	0	0	0	0.005	0	0.003	274.954	0.877
2011001	10000	16	1	0	0.002	0	0.002	0.001	0	0	0	0.005	0	0.003	291.523	0.841
2011001	10000	16	2	0	0.002	0	0.002	0.001	0	0	0	0.005	0	0.003	291.271	0.841
2011001	10000	16	3	0	0.002	0	0.002	0.001	0	0	0	0.005	0	0.003	291.07	0.843
2011001	10000	16	4	0	0.002	0	0.002	0.001	0	0	0	0.004	0	0.003	290.848	0.846
2011001	10000	16	5	0	0.002	0	0.002	0.001	0	0	0	0.004	0	0.003	290.581	0.849
2011001	10000	16	6	0	0.003	0	0.002	0.001	0	0	0	0.004	0	0.003	290.449	0.848
2011001	10000	16	7	0	0.003	0	0.002	0.001	0	0	0	0.004	0	0.003	290.282	0.85
2011001	10000	16	8	0	0.003	0	0.002	0.001	0	0	0	0.004	0	0.003	290.086	0.857
2011001	10000	16	9	0	0.003	0	0.002	0.001	0	0	0	0.004	0	0.003	289.915	0.861
2011001	10000	16	10	0	0.003	0	0.002	0.001	0	0	0	0.004	0	0.003	289.733	0.869
2011001	10000	16	11	0	0.003	0	0.002	0.001	0	0	0	0.004	0	0.003	289.667	0.867
2011001	10000	16	12	0	0.003	0	0.002	0.001	0	0	0	0.004	0	0.003	289.508	0.872
2011001	10000	16	13	0	0.003	0	0.002	0.001	0	0	0	0.004	0	0.003	289.34	0.878
2011001	10000	16	14	0	0.003	0	0.002	0.001	0	0	0	0.004	0	0.003	289.098	0.893
2011001	10000	16	15	0	0.003	0	0.002	0.001	0	0	0	0.004	0	0.003	288.978	0.898
2011001	10000	16	16	0	0.003	0	0.002	0.001	0	0	0	0.004	0	0.003	288.8	0.902
2011001	10000	16	17	0	0.003	0	0.002	0.001	0	0	0	0.004	0	0.003	288.657	0.902
2011001	10000	16	18	0	0.003	0	0.002	0.001	0	0	0	0.004	0	0.003	288.474	0.905
2011001	10000	16	19	0	0.003	0.001	0.002	0.001	0	0	0	0.005	0	0.004	288.343	0.903
2011001	10000	16	20	0	0.004	0.001	0.002	0.001	0	0	0	0.005	0	0.004	288.234	0.903
2011001	10000	16	21	0	0.004	0.001	0.002	0.001	0	0	0	0.005	0	0.004	288.058	0.903
2011001	10000	16	22	0	0.004	0.001	0.002	0.001	0	0	0	0.005	0	0.004	287.908	0.904
2011001	10000	16	23	0	0.005	0.001	0.002	0.001	0	0	0	0.005	0	0.004	287.8	0.905
2011001	10000	16	24	0	0.004	0	0.002	0.001	0	0	0	0.005	0	0.004	287.685	0.904
2011001	10000	16	25	0	0.004	0	0.002	0.001	0	0	0	0.006	0	0.004	287.573	0.907
2011001	10000	16	26	0	0.004	0	0.002	0.001	0	0	0	0.006	0	0.004	287.462	0.906
2011001	10000	16	27	0	0.004	0	0.003	0.001	0	0	0	0.006	0	0.004	287.38	0.91
2011001	10000	16	28	0	0.004	0	0.003	0.001	0	0	0	0.006	0	0.004	287.28	0.909
2011001	10000	16	29	0	0.004	0	0.003	0.001	0	0	0	0.006	0.001	0.004	287.204	0.908
2011001	10000	16	30	0	0.004	0.001	0.003	0.001	0	0	0	0.006	0.001	0.004	287.157	0.908
2011001	10000	16	31	0	0.005	0.001	0.004	0.001	0	0.001	0.001	0.007	0.001	0.004	287.083	0.909
2011001	10000	16	32	0	0.005	0.001	0.004	0.001	0	0.001	0.001	0.007	0.001	0.005	287.123	0.911
2011001	10000	16	33	0	0.006	0.001	0.005	0.002	0	0.001	0.001	0.008	0.001	0.005	287.162	0.911
2011001	10000	16	34	0	0.007	0.001	0.005	0.002	0	0.001	0.001	0.008	0.001	0.005	287.122	0.915
2011001	10000	16	35	0.001	0.007	0.001	0.005	0.002	0	0.001	0.001	0.008	0.001	0.005	287.15	0.913
2011001	10000	16	36	0.001	0.008	0.001	0.005	0.002	0	0.001	0.001	0.008	0.001	0.005	287.064	0.916
2011001	10000	16	37	0.001	0.008	0.001	0.006	0.002	0	0.001	0.001	0.008	0.001	0.005	287.085	0.912
2011001	10000	16	38	0.001	0.008	0.001	0.006	0.002	0	0.001	0.001	0.008	0.001	0.004	287.031	0.911
2011001	10000	16	39	0.001	0.009	0.001	0.006	0.002	0.001	0.001	0.001	0.008	0.002	0.004	286.939	0.909
2011001	10000	16	40	0.001	0.011	0.001	0.006	0.003	0.001	0.001	0.001	0.008	0.002	0.005	286.896	0.905
2011001	10000	16	41	0.002	0.013	0.001	0.006	0.003	0.001	0.001	0.001	0.008	0.002	0.005	286.757	0.901
2011001	10000	16	42	0.002	0.015	0.001	0.006	0.003	0.001	0.001	0.001	0.008	0.002	0.005	286.583	0.89
2011001	10000	16	43	0.003	0.018	0.001	0.006	0.003	0.001	0.001	0.001	0.008	0.002	0.006	286.322	0.877
2011001	10000	16	44	0.004	0.019	0.002	0.005	0.003	0.001	0.001	0.001	0.008	0.002	0.006	286.053	0.87
2011001	10000	16	45	0.003	0.018	0.002	0.005	0.003	0.001	0.001	0.001	0.008	0.002	0.006	285.974	0.876
2011001	10000	16	46	0.003	0.019	0.002	0.005	0.003	0.001	0.001	0.001	0.008	0.002	0.006	285.944	0.9
2011001	10000	16	47	0.004	0.021	0.002	0.004	0.002	0.001	0.001	0.001	0.008	0.002	0.007	285.825	0.912
2011001	10000	16	48	0.006	0.023	0.002	0.004	0.002	0.001	0.001	0.002	0.008	0.002	0.007	285.452	0.914
2011001	10000	16	49	0.008	0.023	0.003	0.003	0.002	0.001	0.001	0.002	0.008	0.003	0.008	285.146	0.904
2011001	10000	16	50	0.006	0.02	0.004	0.003	0.002	0.001	0.001	0.002	0.007	0.003	0.008	285.013	0.891
2011001	10000	16	51	0.005	0.02	0.005	0.003	0.003	0.001	0.001	0.002	0.007	0.004	0.008	285.292	0.88
2011001	10000	16	52	0.004	0.018	0.009	0.002	0.003	0.001	0.001	0.002	0.007	0.005	0.009	285.595	0.862
2011001	10000	16	53	0.003	0.021	0.013	0.002	0.003	0.001	0.001	0.002	0.006	0.006	0.01	285.583	0.819
2011001	10000	16	54	0.002	0.022	0.017	0.001	0.002	0.001	0	0.003	0.006	0.006	0.009	285.184	0.725
2011001	10000	16	55	0.002	0.015	0.016	0.001	0.002	0.001	0	0.003	0.006	0.012	0.016	282.84	0.689
2011001	10000	16	56	0.005	0.013	0.055	0.001	0.003	0.002	0.001	0.006	0.007	0.04	0.042	283.06	0.819
2011001	10000	16	57	0.007	0.021	0.07	0.002	0.004	0.003	0.001	0.01	0.008	0.067	0.056	285.653	0.745
2011001	10000	16	58	0.01	0.01	0.068	0.002	0.004	0.004	0.001	0.014	0.009	0.08	0.063	284.135	0.74
2011001	10000	16	59	0.026	0.005	0.154	0.002	0.005	0.006	0.002	0.023	0.01	0.084	0.057	283.992	0.735
2011001	10000	16	60	0.04	0.004	0.157	0.002	0.005	0.007	0.002	0.029	0.012	0.103	0.066	282.597	0.8
2011001	10000	16	61	0.051	0.005	0.143	0.002	0.006	0.007	0.002	0.022	0.013	0.093	0.071	281.645	0.851
2011001	10000	16	62	0.004	0.006	0.059	0.001	0.003	0.003	0.001	0.008	0.007	0.044	0.039	280.923	0.843
2011001	10000	16	63	0.002	0.005	0.05	0.001	0.002	0.001	0	0.002	0.006	0.019	0.025	280.787	0.779
2011001	10000	16	64	0.005	0.005	0.032	0.001	0.001	0.001	0	0.002	0.005	0.012	0.018	280.866	0.783
2011001	10000	16	65	0.001	0.006	0.005	0	0.001	0	0	0.001	0.005	0.004	0.01	279.775	0.773
2011001	10000	16	66	0.001	0.006	0.003	0	0	0	0	0	0.004	0.003	0.009	278.045	0.746
2011001	10000	16	67	0.001	0.006	0.003	0	0	0	0	0	0.005	0.002	0.008	279.748	0.759
2011001	10000	16	68	0.001	0.006	0.006	0	0.001	0	0	0	0.005	0.001	0.008	279.398	0.704
2011001	10000	16	69	0.001	0.004	0.015	0	0.001	0	0	0	0.005	0.003	0.01	278.709	0.751
2011001	10000	16	70	0.001	0.005	0.005	0	0.001	0	0	0	0.005	0.001	0.008	278.624	0.743
2011001	10000	16	71	0.001	0.005	0.002	0	0.001	0	0	0	0.005	0	0.008	277.954	0.75
2011001	10000	16	72	0.001	0.004	0.001	0	0.001	0	0	0	0.005	0	0.007	278.808	0.79
2011001	10000	16	73	0.001	0.005	0.002	0	0.001	0	0	0	0.005	0	0.007	279.462	0.813
2011001	10000	16	74	0.001	0.005	0.002	0	0.001	0.001	0	0.001	0.005	0	0.006	279.798	0.805
2011001	10000	16	75	0.001	0.004	0.002	0.001	0.001	0.001	0	0.001	0.006	0.001	0.006	279.724	0.795
2011001	10000	16	76	0.001	0.004	0.002	0.001	0.001	0.001	0	0.001	0.006	0	0.006	280.067	0.824
2011001	10000	16	77	0.002	0.004	0.009	0.001	0.002	0.002	0.001	0.004	0.007	0.002	0.006	280.828	0.766
2011001	10000	16	78	0.002	0.004	0.006	0.002	0.003	0.003	0.002	0.008	0.008	0.004	0.003	282.924	0.72
2011001	10000	16	79	0.002	0.007	0.002	0.002	0.003	0.002	0.001	0.004	0.008	0.002	0.004	282.758	0.743
2011001	10000	16	80	0.002	0.008	0.001	0.003	0.002	0.001	0.001	0.002	0.008	0.002	0.005	282.685	0.826
2011001	10000	16	81	0.002	0.009	0.001	0.003	0.002	0.001	0.001	0.002	0.008	0.002	0.005	282.621	0.873
2011001	10000	16	82	0.002	0.008	0.001	0.003	0.002	0.001	0.001	0.002	0.008	0.003	0.005	282.523	0.891
2011001	10000	16	83	0.002	0.008	0.001	0.004	0.002	0.001	0.001	0.001	0.008	0.003	0.006	282.381	0.901
2011001	10000	16	84	0.002	0.009	0.001	0.004	0.001	0.001	0.001	0.001	0.008	0.002	0.005	282.146	0.904
2011001	10000	16	85	0.001	0.008	0.001	0.004	0.001	0	0.001	0.001	0.008	0.001	0.005	281.864	0.906
2011001	10000	16	86	0.001	0.008	0.001	0.004	0.001	0	0.001	0	0.008	0.001	0.005	281.613	0.906
2011001	10000	16	87	0.001	0.009	0.001	0.004	0.001	0	0.001	0	0.009	0.001	0.006	281.58	0.899
2011001	10000	16	88	0.001	0.009	0.001	0.004	0.001	0	0.001	0	0.009	0.001	0.006	281.493	0.899
2011001	10000	16	89	0.001	0.008	0.001	0.004	0.001	0	0.001	0	0.008	0.002	0.006	281.394	0.905
2011001	10000	16	90	0.002	0.008	0.001	0.004	0.001	0	0.001	0	0.009	0.002	0.007	281.306	0.901
2011001	10000	16	91	0.002	0.008	0	0.004	0.001	0	0.001	0	0.008	0.002	0.007	281.154	0.902
2011001	10000	16	92	0.001	0.008	0	0.004	0.001	0	0.001	0	0.008	0.001	0.006	281.103	0.903
2011001	10000	16	93	0.001	0.007	0	0.004	0.001	0	0.001	0	0.009	0.001	0.006	281.104	0.901
2011001	10000	16	94	0.002	0.007	0	0.004	0.001	0	0.001	0	0.008	0	0.005	281.168	0.905
2011001	10000	16	95	0.003	0.007	0	0.004	0.001	0	0.001	0	0.008	0	0.005	281.401	0.911
2011001	10000	16	96	0.002	0.007	0	0.004	0.001	0	0	0	0.008	0	0.005	281.352	0.91
2011001	10000	16	97	0.002	0.007	0	0.004	0.001	0	0	0	0.008	0	0.005	281.163	0.905
2011001	10000	16	98	0.001	0.006	0	0.004	0.001	0	0	0	0.008	0	0.005	280.952	0.897
2011001	10000	16	99	0.002	0.006	0	0.003	0.001	0	0	0	0.007	0	0.004	280.58	0.878
2011001	10000	16	100	0.002	0.005	0	0.003	0.001	0	0	0	0.007	0	0.004	280.222	0.862
2011001	10000	16	101	0.001	0.003	0	0.003	0	0	0	0	0.006	0	0.005	277.36	0.927
2011001	10000	16	102	0.001	0.002	0	0.002	0	0	0	0	0.006	0	0.004	276.827	0.929
2011001	10000	16	103	0.003	0.004	0	0.003	0.001	0	0	0	0.007	0	0.004	279.039	0.856
2011001	10000	16	104	0.002	0.004	0	0.003	0.001	0	0	0	0.006	0	0.004	279.408	0.847
2011001	10000	16	105	0.002	0.003	0	0.003	0.001	0	0	0	0.006	0	0.004	279.709	0.83
2011001	10000	16	106	0.001	0.003	0	0.004	0.002	0	0	0	0.006	0	0.003	279.816	0.808
2011001	10000	16	107	0.001	0.002	0	0.004	0.002	0	0	0	0.006	0	0.003	279.775	0.803
2011001	10000	16	108	0.001	0.002	0	0.003	0.002	0	0	0	0.005	0	0.003	279.098	0.806
2011001	10000	16	109	0.002	0.002	0	0.003	0.001	0	0	0	0.005	0	0.003	278.782	0.794
2011001	10000	16	110	0.002	0.001	0	0.003	0.002	0	0	0	0.005	0	0.003	276.68	0.834
2011001	10000	16	111	0.006	0.001	0	0.002	0.001	0	0	0	0.005	0	0.003	273.768	0.877
2011001	10000	16	112	0.017	0.001	0	0.001	0	0	0	0	0.005	0	0.003	273.682	0.863
2011001	10000	17	1	0	0.002	0	0.002	0.001	0	0	0	0.005	0	0.003	291.505	0.843
2011001	10000	17	2	0	0.002	0	0.002	0.001	0	0	0	0.005	0	0.003	291.212	0.843
2011001	10000	17	3	0	0.002	0	0.002	0.001	0	0	0	0.005	0	0.003	290.989	0.845
2011001	10000	17	4	0	0.002	0	0.002	0.001	0	0	0	0.005	0	0.003	290.753	0.848
2011001	10000	17	5	0	0.002	0	0.002	0.001	0	0	0	0.005	0	0.003	290.571	0.852
2011001	10000	17	6	0	0.002	0	0.002	0.001	0	0	0	0.005	0	0.003	290.315	0.856
2011001	10000	17	7	0	0.002	0	0.002	0.001	0	0	0	0.004	0	0.003	290.165	0.86
2011001	10000	17	8	0	0.002	0	0.002	0.001	0	0	0	0.004	0	0.003	289.972	0.865
2011001	10000	17	9	0	0.003	0	0.002	0.001	0	0	0	0.005	0	0.003	289.826	0.867
2011001	10000	17	10	0	0.003	0	0.002	0.001	0	0	0	0.005	0	0.003	289.663	0.872
2011001	10000	17	11	0	0.003	0	0.002	0.001	0	0	0	0.005	0	0.003	289.524	0.872
2011001	10000	17	12	0	0.003	0	0.002	0.001	0	0	0	0.005	0	0.003	289.4	0.878
2011001	10000	17	13	0	0.003	0	0.002	0.001	0	0	0	0.005	0	0.003	289.188	0.887
2011001	10000	17	14	0	0.003	0	0.002	0.001	0	0	0	0.004	0	0.003	289.032	0.899
2011001	10000	17	15	0	0.003	0	0.002	0.001	0	0	0	0.004	0	0.003	288.863	0.902
2011001	10000	17	16	0	0.003	0	0.002	0.001	0	0	0	0.004	0	0.003	288.719	0.902
2011001	10000	17	17	0	0.003	0.001	0.002	0.001	0	0	0	0.005	0	0.004	288.613	0.902
2011001	10000	17	18	0	0.004	0.001	0.002	0.001	0	0	0	0.005	0	0.004	288.433	0.902
2011001	10000	17	19	0	0.004	0	0.002	0.001	0	0	0	0.005	0	0.004	288.288	0.905
2011001	10000	17	20	0	0.003	0	0.002	0.001	0	0	0	0.005	0	0.004	288.121	0.907
2011001	10000	17	21	0	0.004	0	0.002	0.001	0	0	0	0.005	0	0.004	287.977	0.908
2011001	10000	17	22	0	0.004	0	0.002	0.001	0	0	0	0.005	0	0.004	287.835	0.909
2011001	10000	17	23	0	0.004	0	0.002	0.001	0	0	0	0.005	0	0.004	287.697	0.909
2011001	10000	17	24	0	0.003	0	0.002	0.001	0	0	0	0.005	0	0.004	287.628	0.906
2011001	10000	17	25	0	0.003	0	0.002	0.001	0	0	0	0.005	0	0.004	287.501	0.907
2011001	10000	17	26	0	0.004	0	0.002	0.001	0	0	0	0.006	0	0.004	287.424	0.907
2011001	10000	17	27	0	0.004	0	0.002	0.001	0	0	0	0.006	0	0.004	287.278	0.909
2011001	10000	17	28	0	0.004	0	0.003	0.001	0	0	0	0.006	0	0.004	287.184	0.911
2011001	10000	17	29	0	0.004	0.001	0.003	0.001	0	0	0	0.006	0.001	0.004	287.146	0.909
2011001	10000	17	30	0	0.004	0.001	0.003	0.001	0	0	0	0.006	0.001	0.004	287.081	0.912
2011001	10000	17	31	0	0.005	0.001	0.004	0.001	0	0.001	0.001	0.007	0.001	0.005	287.086	0.911
2011001	10000	17	32	0	0.006	0.001	0.004	0.001	0	0.001	0.001	0.007	0.001	0.005	287.098	0.912
2011001	10000	17	33	0	0.007	0.001	0.004	0.001	0	0.001	0.001	0.008	0.001	0.005	287.102	0.913
2011001	10000	17	34	0.001	0.007	0.001	0.005	0.002	0	0.001	0.001	0.008	0.001	0.005	287.117	0.912
2011001	10000	17	35	0.001	0.008	0.001	0.005	0.002	0	0.001	0.001	0.008	0.001	0.005	287.058	0.914
2011001	10000	17	36	0.001	0.008	0.001	0.005	0.002	0	0.001	0.001	0.008	0.001	0.005	287.045	0.915
2011001	10000	17	37	0.001	0.009	0.001	0.005	0.002	0	0.001	0.001	0.008	0.001	0.005	287.067	0.911
2011001	10000	17	38	0.001	0.009	0.001	0.006	0.002	0	0.001	0.001	0.008	0.001	0.005	286.973	0.913
2011001	10000	17	39	0.002	0.011	0.001	0.006	0.002	0.001	0.001	0.001	0.008	0.002	0.005	286.965	0.904
2011001	10000	17	40	0.002	0.013	0.001	0.006	0.002	0.001	0.001	0.001	0.008	0.002	0.005	286.853	0.903
2011001	10000	17	41	0.002	0.016	0.001	0.005	0.003	0.001	0.001	0.001	0.008	0.002	0.006	286.69	0.892
2011001	10000	17	42	0.003	0.021	0.002	0.005	0.003	0.001	0.001	0.001	0.008	0.003	0.006	286.337	0.874
2011001	10000	17	43	0.004	0.024	0.002	0.005	0.003	0.001	0.001	0.001	0.008	0.003	0.007	285.845	0.851
2011001	10000	17	44	0.005	0.024	0.003	0.005	0.003	0.001	0.001	0.001	0.008	0.003	0.007	285.543	0.834
2011001	10000	17	45	0.005	0.022	0.002	0.005	0.003	0.001	0.001	0.001	0.008	0.002	0.006	285.579	0.85
2011001	10000	17	46	0.004	0.021	0.002	0.004	0.003	0.001	0.001	0.001	0.008	0.002	0.007	285.856	0.892
2011001	10000	17	47	0.005	0.024	0.002	0.004	0.002	0.001	0.001	0.001	0.008	0.002	0.008	286.089	0.918
2011001	10000	17	48	0.007	0.023	0.003	0.003	0.002	0.001	0.001	0.002	0.008	0.003	0.008	285.735	0.914
2011001	10000	17	49	0.006	0.019	0.006	0.003	0.003	0.001	0.001	0.002	0.007	0.004	0.008	285.403	0.877
2011001	10000	17	50	0.003	0.019	0.012	0.002	0.003	0.001	0	0.002	0.006	0.004	0.007	286.074	0.777
2011001	10000	17	51	0.003	0.018	0.015	0.002	0.003	0.001	0.001	0.003	0.006	0.005	0.008	285.785	0.826
2011001	10000	17	52	0.002	0.017	0.027	0.001	0.003	0.001	0.001	0.004	0.006	0.009	0.011	285.716	0.808
2011001	10000	17	53	0.002	0.013	0.022	0.001	0.002	0.001	0.001	0.003	0.006	0.01	0.012	283.645	0.744
2011001	10000	17	54	0.002	0.014	0.022	0.001	0.002	0.001	0	0.002	0.006	0.009	0.012	283.187	0.638
2011001	10000	17	55	0.002	0.014	0.033	0.001	0.002	0.001	0.001	0.003	0.006	0.018	0.02	282.172	0.629
2011001	10000	17	56	0.003	0.013	0.047	0.001	0.002	0.002	0.001	0.005	0.006	0.03	0.029	282.66	0.675
2011001	10000	17	57	0.004	0.009	0.102	0.002	0.004	0.004	0.002	0.013	0.007	0.065	0.048	283.878	0.722
2011001	10000	17	58	0.005	0.009	0.062	0.001	0.004	0.004	0.001	0.016	0.007	0.066	0.043	283.007	0.72
2011001	10000	17	59	0.008	0.009	0.075	0.001	0.004	0.005	0.001	0.018	0.008	0.069	0.046	282.692	0.665
2011001	10000	17	60	0.018	0.007	0.12	0.002	0.005	0.008	0.002	0.026	0.01	0.106	0.069	281.94	0.779
2011001	10000	17	61	0.021	0.008	0.126	0.002	0.006	0.008	0.002	0.022	0.01	0.093	0.063	280.735	0.855
2011001	10000	17	62	0.003	0.007	0.04	0.001	0.004	0.004	0.001	0.01	0.007	0.062	0.051	280.438	0.844
2011001	10000	17	63	0.002	0.008	0.017	0.001	0.002	0.002	0.001	0.004	0.006	0.025	0.026	280.616	0.825
2011001	10000	17	64	0.002	0.006	0.021	0.001	0.002	0.002	0	0.003	0.005	0.016	0.018	280.979	0.797
2011001	10000	17	65	0.001	0.006	0.013	0.001	0.001	0.001	0	0.002	0.005	0.007	0.012	281.413	0.768
2011001	10000	17	66	0.001	0.007	0.009	0.001	0.001	0.001	0	0.001	0.005	0.005	0.011	280.423	0.699
2011001	10000	17	67	0.001	0.006	0.011	0.001	0.001	0.001	0	0.001	0.005	0.004	0.01	281.946	0.724
2011001	10000	17	68	0.001	0.005	0.019	0.001	0.001	0.001	0	0.001	0.005	0.004	0.01	282.003	0.72
2011001	10000	17	69	0.001	0.004	0.035	0	0.001	0	0	0.001	0.005	0.004	0.012	279.407	0.749
2011001	10000	17	70	0.001	0.005	0.009	0	0.001	0	0	0	0.005	0.002	0.009	277.519	0.73
2011001	10000	17	71	0.001	0.005	0.003	0	0.001	0	0	0	0.005	0.001	0.008	276.05	0.729
2011001	10000	17	72	0.001	0.004	0.003	0	0	0	0	0	0.004	0.001	0.007	276.035	0.802
2011001	10000	17	73	0.001	0.004	0.004	0	0.001	0	0	0	0.005	0.001	0.007	276.239	0.803
2011001	10000	17	74	0.002	0.004	0.005	0.001	0.001	0.001	0	0.002	0.005	0.001	0.006	277.498	0.787
2011001	10000	17	75	0.001	0.004	0.004	0.001	0.001	0.002	0	0.002	0.006	0.002	0.006	277.234	0.812
2011001	10000	17	76	0.001	0.004	0.004	0.001	0.001	0.001	0	0.001	0.006	0.001	0.006	278.316	0.774
2011001	10000	17	77	0.002	0.004	0.006	0.001	0.001	0.001	0	0.001	0.006	0.001	0.007	280.321	0.776
2011001	10000	17	78	0.001	0.004	0.004	0.001	0.002	0.002	0.001	0.003	0.007	0.001	0.006	280.779	0.749
2011001	10000	17	79	0.001	0.004	0.002	0.002	0.002	0.002	0.001	0.005	0.007	0.003	0.005	280.248	0.793
2011001	10000	17	80	0.001	0.006	0.003	0.002	0.003	0.002	0.001	0.004	0.007	0.003	0.004	282.002	0.835
2011001	10000	17	81	0.001	0.008	0.002	0.003	0.003	0.001	0.001	0.003	0.008	0.004	0.005	282.523	0.865
2011001	10000	17	82	0.001	0.008	0.001	0.003	0.003	0.001	0.001	0.003	0.008	0.005	0.005	282.739	0.881
2011001	10000	17	83	0.002	0.01	0.001	0.003	0.002	0.001	0.001	0.002	0.008	0.004	0.006	282.49	0.898
2011001	10000	17	84	0.002	0.011	0.001	0.003	0.001	0.001	0.001	0.001	0.008	0.002	0.006	282.194	0.91
2011001	10000	17	85	0.003	0.01	0.001	0.004	0.001	0.001	0.001	0.001	0.009	0.002	0.006	281.87	0.906
2011001	10000	17	86	0.003	0.01	0.001	0.004	0.001	0	0.001	0.001	0.009	0.001	0.005	281.578	0.9
2011001	10000	17	87	0.003	0.011	0.001	0.004	0.001	0	0.001	0	0.009	0.001	0.006	281.419	0.897
2011001	10000	17	88	0.002	0.011	0.001	0.004	0.001	0	0.001	0	0.009	0.002	0.006	281.5	0.897
2011001	10000	17	89	0.002	0.01	0.001	0.004	0.001	0	0.001	0	0.008	0.002	0.006	281.439	0.901
2011001	10000	17	90	0.002	0.01	0.001	0.004	0.001	0	0.001	0	0.008	0.002	0.007	281.318	0.899
2011001	10000	17	91	0.002	0.01	0.001	0.004	0.001	0	0.001	0	0.008	0.002	0.007	281.156	0.901
2011001	10000	17	92	0.001	0.009	0.001	0.004	0.001	0	0.001	0	0.008	0.001	0.006	281.04	0.899
2011001	10000	17	93	0.002	0.009	0	0.004	0.001	0	0	0	0.008	0.001	0.006	281.015	0.901
2011001	10000	17	94	0.003	0.008	0	0.004	0.001	0	0	0	0.008	0.001	0.005	281.234	0.906
2011001	10000	17	95	0.004	0.008	0	0.003	0.001	0	0	0	0.008	0.001	0.005	281.396	0.908
2011001	10000	17	96	0.002	0.009	0	0.003	0.001	0	0	0	0.008	0	0.005	281.501	0.901
2011001	10000	17	97	0.002	0.007	0	0.003	0.001	0	0	0	0.008	0	0.005	281.463	0.88
2011001	10000	17	98	0.002	0.006	0	0.003	0.001	0	0	0	0.007	0	0.005	279.994	0.892
2011001	10000	17	99	0.001	0.004	0	0.002	0	0	0	0	0.006	0	0.004	278.437	0.917
2011001	10000	17	100	0.001	0.004	0	0.002	0	0	0	0	0.006	0	0.005	276.714	0.912
2011001	10000	17	101	0.005	0.003	0.001	0.004	0.001	0.002	0	0	0.007	0.001	0.007	276.301	0.896
2011001	10000	17	102	0.005	0.006	0.001	0.003	0.001	0.001	0	0	0.007	0	0.006	278.013	0.862
2011001	10000	17	103	0.003	0.005	0	0.002	0.001	0	0	0	0.006	0	0.005	279.648	0.824
2011001	10000	17	104	0.002	0.003	0	0.002	0.001	0	0	0	0.006	0	0.004	278.116	0.85
2011001	10000	17	105	0.001	0.003	0	0.003	0.001	0	0	0	0.006	0	0.004	278.336	0.835
2011001	10000	17	106	0.001	0.002	0	0.003	0.001	0	0	0	0.005	0	0.003	279.11	0.796
2011001	10000	17	107	0.001	0.002	0	0.003	0.001	0	0	0	0.005	0	0.003	278.41	0.801
2011001	10000	17	108	0.001	0.001	0	0.002	0.001	0	0	0	0.005	0	0.003	275.616	0.851
2011001	10000	17	109	0.001	0.001	0	0.001	0	0	0	0	0.005	0	0.003	274.117	0.869
2011001	10000	17	110	0.002	0.001	0	0.001	0	0	0	0	0.004	0	0.003	272.855	0.868
2011001	10000	17	111	0.009	0.001	0	0.001	0	0	0	0	0.005	0	0.003	272.9	0.859
2011001	10000	17	112	0.046	0.001	0	0.001	0	0	0	0	0.005	0	0.004	271.747	0.86
2011001	10000	18	1	0	0.002	0	0.002	0.001	0	0	0	0.005	0	0.003	291.495	0.844
2011001	10000	18	2	0	0.002	0	0.002	0.001	0	0	0	0.005	0	0.004	291.253	0.845
2011001	10000	18	3	0	0.003	0	0.002	0.001	0	0	0	0.005	0	0.004	290.936	0.847
2011001	10000	18	4	0	0.002	0	0.002	0.001	0	0	0	0.005	0	0.004	290.728	0.85
2011001	10000	18	5	0	0.003	0	0.002	0.001	0	0	0	0.005	0	0.003	290.47	0.852
2011001	10000	18	6	0	0.002	0	0.002	0.001	0	0	0	0.005	0	0.003	290.271	0.857
2011001	10000	18	7	0	0.002	0	0.002	0.001	0	0	0	0.005	0	0.003	290.104	0.863
2011001	10000	18	8	0	0.003	0	0.002	0.001	0	0	0	0.005	0	0.003	289.924	0.87
2011001	10000	18	9	0	0.003	0	0.002	0.001	0	0	0	0.005	0	0.004	289.746	0.871
2011001	10000	18	10	0	0.003	0	0.002	0.001	0	0	0	0.005	0	0.004	289.588	0.873
2011001	10000	18	11	0	0.003	0	0.002	0.001	0	0	0	0.005	0	0.004	289.477	0.876
2011001	10000	18	12	0	0.003	0	0.002	0.001	0	0	0	0.005	0	0.003	289.288	0.886
2011001	10000	18	13	0	0.003	0	0.002	0.001	0	0	0	0.005	0	0.003	289.075	0.898
2011001	10000	18	14	0	0.003	0	0.002	0.001	0	0	0	0.005	0	0.003	288.9	0.903
2011001	10000	18	15	0	0.003	0	0.002	0.001	0	0	0	0.004	0	0.003	288.773	0.906
2011001	10000	18	16	0	0.003	0	0.002	0.001	0	0	0	0.004	0	0.003	288.65	0.906
2011001	10000	18	17	0	0.003	0	0.002	0.001	0	0	0	0.005	0	0.003	288.524	0.906
2011001	10000	18	18	0	0.003	0	0.002	0.001	0	0	0	0.004	0	0.003	288.37	0.908
2011001	10000	18	19	0	0.003	0	0.002	0.001	0	0	0	0.005	0	0.003	288.196	0.91
2011001	10000	18	20	0	0.003	0	0.002	0.001	0	0	0	0.005	0	0.004	288.076	0.911
2011001	10000	18	21	0	0.003	0	0.002	0.001	0	0	0	0.005	0	0.004	287.905	0.91
2011001	10000	18	22	0	0.003	0	0.002	0.001	0	0	0	0.005	0	0.004	287.764	0.91
2011001	10000	18	23	0	0.003	0	0.002	0.001	0	0	0	0.005	0	0.004	287.644	0.91
2011001	10000	18	24	0	0.003	0	0.002	0.001	0	0	0	0.005	0	0.004	287.542	0.91
2011001	10000	18	25	0	0.003	0	0.002	0.001	0	0	0	0.005	0	0.004	287.462	0.909
2011001	10000	18	26	0	0.004	0	0.002	0.001	0	0	0	0.006	0	0.004	287.329	0.908
2011001	10000	18	27	0	0.004	0	0.002	0.001	0	0	0	0.006	0	0.004	287.217	0.909
2011001	10000	18	28	0	0.004	0	0.003	0.001	0	0	0	0.006	0	0.004	287.136	0.91
2011001	10000	18	29	0	0.004	0.001	0.003	0.001	0	0	0	0.006	0.001	0.004	287.042	0.912
2011001	10000	18	30	0	0.005	0.001	0.003	0.001	0	0	0.001	0.007	0.001	0.004	287.041	0.913
2011001	10000	18	31	0	0.005	0	0.004	0.001	0	0.001	0.001	0.007	0.001	0.005	287.074	0.913
2011001	10000	18	32	0	0.006	0.001	0.004	0.001	0	0.001	0.001	0.007	0.001	0.005	287.087	0.914
2011001	10000	18	33	0.001	0.006	0.001	0.005	0.002	0	0.001	0.001	0.008	0.001	0.005	287.122	0.913
2011001	10000	18	34	0.001	0.007	0.001	0.005	0.002	0	0.001	0.001	0.008	0.001	0.005	287.082	0.915
2011001	10000	18	35	0.001	0.008	0.001	0.005	0.002	0	0.001	0.001	0.008	0.001	0.005	287.049	0.915
2011001	10000	18	36	0.001	0.009	0.001	0.005	0.002	0	0.001	0.001	0.008	0.001	0.005	287.025	0.913
2011001	10000	18	37	0.001	0.01	0.001	0.005	0.002	0.001	0.001	0.001	0.008	0.001	0.005	287.029	0.91
2011001	10000	18	38	0.002	0.011	0.001	0.005	0.002	0.001	0.001	0.001	0.008	0.002	0.005	287.025	0.905
2011001	10000	18	39	0.002	0.012	0.001	0.005	0.002	0.001	0.001	0.001	0.008	0.002	0.005	286.929	0.903
2011001	10000	18	40	0.002	0.014	0.001	0.005	0.002	0.001	0.001	0.001	0.008	0.002	0.005	286.879	0.894
2011001	10000	18	41	0.003	0.019	0.002	0.005	0.003	0.001	0.001	0.001	0.008	0.002	0.006	286.6	0.879
2011001	10000	18	42	0.004	0.025	0.003	0.005	0.003	0.001	0.001	0.001	0.008	0.003	0.007	286.082	0.853
2011001	10000	18	43	0.005	0.028	0.004	0.004	0.004	0.001	0.001	0.001	0.008	0.003	0.008	285.42	0.821
2011001	10000	18	44	0.005	0.028	0.004	0.004	0.004	0.001	0.001	0.002	0.008	0.003	0.008	284.93	0.804
2011001	10000	18	45	0.006	0.025	0.003	0.004	0.003	0.001	0.001	0.001	0.008	0.002	0.007	285.255	0.823
2011001	10000	18	46	0.004	0.023	0.003	0.004	0.003	0.001	0.001	0.001	0.008	0.002	0.007	285.942	0.877
2011001	10000	18	47	0.005	0.023	0.003	0.003	0.003	0.001	0.001	0.002	0.008	0.002	0.008	286.552	0.906
2011001	10000	18	48	0.006	0.019	0.007	0.003	0.003	0.001	0.001	0.002	0.007	0.003	0.007	286.829	0.87
2011001	10000	18	49	0.004	0.016	0.021	0.002	0.003	0.001	0.001	0.002	0.005	0.003	0.006	287.477	0.721
2011001	10000	18	50	0.005	0.01	0.028	0.001	0.002	0.001	0.001	0.003	0.005	0.007	0.009	285.664	0.712
2011001	10000	18	51	0.005	0.011	0.038	0.001	0.003	0.001	0.001	0.004	0.006	0.012	0.013	284.605	0.712
2011001	10000	18	52	0.003	0.012	0.039	0.001	0.002	0.001	0.001	0.003	0.005	0.015	0.016	283.599	0.735
2011001	10000	18	53	0.002	0.013	0.048	0.001	0.002	0.002	0.001	0.004	0.005	0.023	0.023	282.924	0.678
2011001	10000	18	54	0.003	0.014	0.031	0.001	0.002	0.001	0.001	0.003	0.006	0.021	0.022	282.207	0.674
2011001	10000	18	55	0.002	0.018	0.025	0.001	0.001	0.001	0	0.003	0.006	0.021	0.022	281.193	0.682
2011001	10000	18	56	0.002	0.021	0.03	0.001	0.001	0.001	0.001	0.003	0.006	0.028	0.028	281.026	0.698
2011001	10000	18	57	0.003	0.016	0.072	0.001	0.003	0.003	0.001	0.007	0.006	0.064	0.058	281.773	0.724
2011001	10000	18	58	0.004	0.011	0.126	0.001	0.003	0.003	0.001	0.008	0.006	0.074	0.067	281.689	0.767
2011001	10000	18	59	0.01	0.008	0.187	0.002	0.003	0.004	0.002	0.01	0.007	0.087	0.077	281.537	0.76
2011001	10000	18	60	0.021	0.004	0.309	0.002	0.006	0.006	0.002	0.015	0.01	0.1	0.084	280.716	0.861
2011001	10000	18	61	0.007	0.005	0.182	0.002	0.005	0.006	0.002	0.013	0.008	0.092	0.074	280.311	0.87
2011001	10000	18	62	0.012	0.003	0.201	0.002	0.006	0.008	0.003	0.021	0.009	0.102	0.071	280.349	0.868
2011001	10000	18	63	0.004	0.006	0.067	0.002	0.004	0.004	0.001	0.009	0.007	0.072	0.062	280.731	0.867
2011001	10000	18	64	0.002	0.006	0.068	0.002	0.004	0.004	0.001	0.008	0.006	0.045	0.038	281.173	0.833
2011001	10000	18	65	0.003	0.006	0.071	0.001	0.003	0.003	0.001	0.005	0.006	0.021	0.02	282.389	0.786
2011001	10000	18	66	0.003	0.006	0.086	0.001	0.003	0.003	0.001	0.005	0.006	0.014	0.013	282.567	0.687
2011001	10000	18	67	0.002	0.006	0.073	0.001	0.002	0.002	0.001	0.004	0.005	0.01	0.01	283.022	0.663
2011001	10000	18	68	0.003	0.005	0.118	0.001	0.003	0.003	0.001	0.004	0.006	0.012	0.011	282.921	0.669
2011001	10000	18	69	0.002	0.005	0.034	0.001	0.001	0.001	0	0.001	0.005	0.005	0.011	280.822	0.71
2011001	10000	18	70	0.001	0.005	0.005	0	0.001	0	0	0.001	0.005	0.002	0.008	277.001	0.746
2011001	10000	18	71	0.002	0.004	0.011	0	0.001	0	0	0.001	0.004	0.002	0.009	275.325	0.767
2011001	10000	18	72	0.002	0.003	0.026	0	0.001	0.001	0	0.001	0.005	0.003	0.009	275.39	0.807
2011001	10000	18	73	0.001	0.003	0.006	0.001	0.001	0.001	0	0.001	0.005	0.002	0.007	275.819	0.79
2011001	10000	18	74	0.002	0.003	0.017	0.002	0.004	0.004	0.001	0.003	0.006	0.005	0.008	276.66	0.782
2011001	10000	18	75	0.002	0.003	0.009	0.001	0.002	0.003	0.001	0.002	0.006	0.004	0.007	276.865	0.809
2011001	10000	18	76	0.001	0.004	0.005	0.001	0.001	0.002	0	0.002	0.006	0.002	0.007	278.086	0.803
2011001	10000	18	77	0.002	0.004	0.015	0.001	0.003	0.004	0.001	0.004	0.007	0.005	0.008	279.369	0.801
2011001	10000	18	78	0.001	0.004	0.006	0.001	0.002	0.002	0	0.002	0.007	0.002	0.007	279.5	0.786
2011001	10000	18	79	0.001	0.004	0.003	0.001	0.001	0.002	0.001	0.002	0.007	0.003	0.007	278.994	0.852
2011001	10000	18	80	0.001	0.004	0.002	0.002	0.002	0.002	0.001	0.003	0.007	0.004	0.007	278.707	0.876
2011001	10000	18	81	0.001	0.005	0.002	0.003	0.002	0.002	0.001	0.004	0.008	0.008	0.008	280.024	0.891
2011001	10000	18	82	0.002	0.007	0.003	0.003	0.003	0.003	0.001	0.007	0.008	0.009	0.006	281.806	0.872
2011001	10000	18	83	0.002	0.01	0.002	0.003	0.002	0.002	0.001	0.004	0.008	0.007	0.007	282.091	0.898
2011001	10000	18	84	0.002	0.011	0.002	0.003	0.002	0.001	0.001	0.002	0.008	0.006	0.008	282.392	0.902
2011001	10000	18	85	0.002	0.012	0.002	0.003	0.002	0.001	0.001	0.002	0.008	0.005	0.008	281.816	0.905
2011001	10000	18	86	0.003	0.012	0.002	0.004	0.001	0.001	0.001	0.001	0.009	0.002	0.006	281.362	0.896
2011001	10000	18	87	0.004	0.014	0.002	0.004	0.001	0.001	0.001	0.001	0.009	0.002	0.006	281.42	0.892
2011001	10000	18	88	0.004	0.013	0.002	0.004	0.001	0.001	0.001	0.001	0.009	0.002	0.007	281.615	0.894
2011001	10000	18	89	0.004	0.014	0.001	0.004	0.001	0.001	0.001	0.001	0.009	0.003	0.007	281.713	0.898
2011001	10000	18	90	0.003	0.014	0.001	0.004	0.001	0	0.001	0	0.008	0.002	0.007	281.428	0.898
2011001	10000	18	91	0.003	0.013	0.001	0.004	0.001	0	0	0	0.008	0.001	0.007	281.194	0.897
2011001	10000	18	92	0.002	0.012	0.001	0.003	0.001	0	0	0	0.008	0.001	0.007	281.102	0.894
2011001	10000	18	93	0.003	0.012	0.001	0.003	0.001	0	0	0	0.008	0.001	0.007	281.031	0.896
2011001	10000	18	94	0.005	0.011	0.001	0.003	0.001	0	0	0	0.008	0.001	0.006	280.94	0.899
[truncated: 14,578 more rows]
