# Supplementary material for: Understanding nitrate formation in a world with less sulfate
Source: Copernicus journal article supplement (doi:10.5194/acp-18-12765-2018), 2018-09-05
Supplement: Supplementary file 2 [file acp-18-12765-2018-supplement.zip › DATA/ORGANIC PH.xlsx]

## Sheet: INPUTS
Date	Hour	NH3	SO2	HNO3	CL	NA	MG	K	CA	NH4	NO3	SO4	T	RH		TOTNH4 for eaim	TOTSO4	TOTNO3	H+	TEST	MOLALITY H EAIM	pH EAIM	pH 25% OXALIC	pH 50% OXALIC	ISORROPIA PH
8162011	12.5	0.0265201	0.0729842	0.0563376	0	0	0	0	0	0.0483851	0.0014842	0.0458147	300.532	0.650296	JST AUG	0.0916293	0.0458147	0.0578218	0.0578218	0.0025704	0.1547	0.81051	0.821311	0.829738	-0.221604
5162011	12.5	0.0177687	0.106349	0.0620216	0	0	0	0	0	0.057875	0.0060977	0.0499382	294.006	0.661165	JST MAY	0.0998764	0.0499382	0.0681193	0.0681193	0.00793678	0.1207	0.918293	0.922269	0.90518	-0.298572
11157011	12.5	0.0243839	0.0674807	0.0218423	0	0	0	0	0	0.0281667	0.0150833	0.0243244	285.246	0.711705	JST NOV	0.0486488	0.0243244	0.0369256	0.0369256	0.00384226	0.04843	1.31489	1.3156	1.25329	0.554035
9157011	12.5	0.0235238	0.0645208	0.0487277	0	0	0	0	0	0.0562887	0.00488988	0.0462842	295.034	0.716555	JST SEP	0.0925685	0.0462842	0.0536176	0.0536176	0.0100045	0.1243	0.905529	0.90309	0.833274	-0.0368647
6157011	12.5	0.00665625	0.0312232	0.0128646	0	0	0	0	0	0.0293304	0.00046875	0.0264717	300.63	0.690435	SOAS JUNE	0.0529435	0.0264717	0.0133333	0.0133333	0.00285863	0.2827	0.548674	0.547447	0.546376	-0.0105711
7162011	12.5	0.0024727	0.0151925	0.00834195	0	0	0	0	0	0.0154468	9.62644e-05	0.0168046	300.742	0.789766	SOAS JUL	0.0336092	0.0168046	0.00843822	0.00843822	-0.00135776	0.4543	0.342657	0.343614	0.344573	0.066909
8162011	12.5	0.00285057	0.0565417	0.018569	0	0	0	0	0	0.0440144	0.000521552	0.0405345	301.27	0.688149	SOAS AUG	0.081069	0.0405345	0.0190905	0.0190905	0.00347989	0.2933	0.532688	0.529002	0.52491	0.140557
12162011	12.5	0.00486782	0.0769483	0.0344555	0	0	0	0	0	0.0268118	0.00894684	0.0268649	281.464	0.738438	YRK DEC	0.0537299	0.0268649	0.0434023	0.0434023	-5.31609e-05	0.1231	0.909742	0.71108	0.567351	-0.461947
7162011	12.5	0.0640374	0.0211983	0.0124195	0	0	0	0	0	0.0407457	0.00132615	0.0245259	299.308	0.801626	YRK JUL	0.0490517	0.0245259	0.0137457	0.0137457	0.0162198	0.09942	1.00253	1.09588	1.17836	1.48754
SUBSTITUTION TEST
Date	Hour	NH3	SO2	HNO3	CL	NA	MG	K	CA	NH4	NO3	SO4	T	RH	FACTOR	TOTNH4 for eaim	TOTSO4	TOTNO3	H+	TEST	MOLALITY H EAIM	pH EAIM	WATER	GAS OXALIC MOLES	GRAMS OXALIC AQ(grams	MOLES AQ OXALIC	PARTITIONING RATIO	WATER ug
8.27146e+06	12.5	0.0192312	0.0569376	0.03062	0	0	0	0	0	0.0385627	0.00432385	0.033507	295.359	0.71646	1	0.06	0.03	0.0349438	0.0349438	0.0050557	0.1524	0.817015	3.599e-06	2.403e-15	0	0	0	3.599
														10% substitution	0.9	0.054	0.027				0.1535	0.813892	3.264e-06	2.127e-15	1.798e-08	1.99114e-10	0.999989	3.264
														20% substitution	0.8	0.048	0.024				0.1546	0.810791	2.924e-06	5.3277e-09	3.272e-08	3.62348e-10	0.063681	2.924
														30% substitution	0.7	0.042	0.021				0.1557	0.807711	2.579e-06	8.1066e-09	4.396e-08	4.86822e-10	0.0566505	2.579
														40% substitution	0.6	0.036	0.018				0.1567	0.804931	2.229e-06	1.0965e-08	5.144e-08	5.69657e-10	0.0493865	2.229
														50% substitution	0.5	0.03	0.015				0.1576	0.802444	1.873e-06	1.3907e-08	5.489e-08	6.07863e-10	0.0418786	1.873
														60% substitution	0.4	0.024	0.012				0.1584	0.800245	1.511e-06	1.6935e-08	5.399e-08	5.97896e-10	0.0341014	1.511
														70% substitution	0.3	0.018	0.009				0.1592	0.798057	1.143e-06	2.0053e-08	4.844e-08	5.36434e-10	0.0260539	1.143
														80% substitution	0.2	0.012	0.006				0.1598	0.796423	7.689e-07	2.3266e-08	3.785e-08	4.19158e-10	0.0176971	0.7689
														90% substitution	0.1	0.006	0.003				0.1602	0.795337	3.881e-07	2.6579e-08	2.186e-08	2.42082e-10	0.00902581	0.3881
														100% substitution	0	0	0				NO LIQUID
																	OXALIC
														0	0		0
														0.1	0.1		0.003
														0.2	0.2		0.006
														0.3	0.3		0.009
														0.4	0.4		0.012
														0.5	0.5		0.015
														0.6	0.6		0.018
														0.7	0.7		0.021
														0.8	0.8		0.024
														0.9	0.9		0.027
															1		0.03
																1.0395e-07
																7.0292e-08

## Sheet: Results from ISORROPIA
Date	Hour	NH3	SO2	HNO3	NA	CL	K	MG	CA	NH4	NO3	SO4	T	RH	e_NO3	Water	H+	pH	THESE ARE IN UG/M3
8162011	12.5	0.0265201	0.0729842	0.0563376	0	0	0	0	0	0.0483851	0.0014842	0.0458147	300.532	0.650296	0.000734329	4.03533	0.00672176	-0.221604
5162011	12.5	0.0177687	0.106349	0.0620216	0	0	0	0	0	0.057875	0.0060977	0.0499382	294.006	0.661165	0.00077945	4.37278	0.0086962	-0.298572
1157011	12.5	0.0243839	0.0674807	0.0218423	0	0	0	0	0	0.0281667	0.0150833	0.0243244	285.246	0.711705	0.049006	2.98249	0.000832806	0.554035
9157011	12.5	0.0235238	0.0645208	0.0487277	0	0	0	0	0	0.0562887	0.00488988	0.0462842	295.034	0.716555	0.00336075	5.40918	0.00588839	-0.0368647
6157011	12.5	0.00665625	0.0312232	0.0128646	0	0	0	0	0	0.0293304	0.00046875	0.0264717	300.63	0.690435	0.000212192	2.66309	0.0027287	-0.0105711
7162011	12.5	0.0024727	0.0151925	0.00834195	0	0	0	0	0	0.0154468	9.62644e-05	0.0168046	300.742	0.789766	0.000167847	2.74588	0.00235382	0.066909
8162011	12.5	0.00285058	0.0565417	0.018569	0	0	0	0	0	0.0440144	0.000521552	0.0405345	301.27	0.688149	0.000159204	4.23922	0.00306711	0.140557
2162011	12.5	0.00486782	0.0769483	0.0344555	0	0	0	0	0	0.0268118	0.00894684	0.0268649	281.464	0.738438	0.000936985	3.4312	0.00994016	-0.461947
7162011	12.5	0.0640374	0.0211983	0.0124195	0	0	0	0	0	0.0407457	0.00132615	0.0245259	299.308	0.801626	0.0374848	4.22501	0.000137496	1.48754

## Sheet: CLEAN
ISORROPIA PH	pH EAIM	pH 25% OXALIC	pH 50% OXALIC
-0.221604	0.81051	0.821311	0.829738
-0.298572	0.918293	0.922269	0.90518
0.554035	1.31489	1.3156	1.25329
-0.0368647	0.905529	0.90309	0.833274
-0.0105711	0.548674	0.547447	0.546376
0.066909	0.342657	0.343614	0.344573
0.140557	0.532688	0.529002	0.52491
-0.461947	0.909742	0.71108	0.567351
1.48754	1.00253	1.09588	1.17836
