# Supplementary material for: Understanding nitrate formation in a world with less sulfate
Source: Copernicus journal article supplement (doi:10.5194/acp-18-12765-2018), 2018-09-05
Supplement: Supplementary file 2 [file acp-18-12765-2018-supplement.zip › DATA/RAW DATA FOR DIURNALS/data_extract_JST_aug_mod.csv]

Date	Hour	NH3	SO2	HNO3	CL	NA	MG	K	CA	NH4	NO3	SO4	T	RH	e_NO3	Water	H+	pH
08022011	01	0.072	0.035	0.180	0.000	0.001	0.001	0.002	0.004	0.029	0.010	0.016	298.603	0.846	NaN	14.65132	0.1016771	-0.8413466
08022011	02	0.064	0.031	0.154	0.000	0.001	0.001	0.002	0.004	0.031	0.012	0.016	298.337	0.864	NaN	14.98921	0.8311008E-01	-0.7438748
08022011	03	0.060	0.030	0.134	0.000	0.001	0.001	0.002	0.004	0.031	0.012	0.016	298.192	0.870	NaN	15.69200	0.6663969E-01	-0.6280546
08022011	04	0.063	0.032	0.121	0.000	0.001	0.001	0.002	0.004	0.031	0.011	0.016	298.088	0.873	NaN	16.20979	0.4950444E-01	-0.4848669
08022011	05	0.073	0.037	0.112	0.000	0.001	0.001	0.002	0.004	0.032	0.013	0.016	298.000	0.875	NaN	19.94812	0.3167800E-01	-0.2008558
08022011	06	0.091	0.046	0.097	0.001	0.001	0.002	0.002	0.004	0.038	0.020	0.016	297.946	0.879	0.1838393	7.493929	0.2468693E-04	2.482242
08022011	07	0.103	0.054	0.092	0.001	0.001	0.003	0.002	0.005	0.044	0.028	0.017	298.808	0.887	0.2643034	10.48352	0.2793398E-04	2.574374
08022011	08	0.101	0.053	0.126	0.001	0.001	0.003	0.003	0.007	0.037	0.024	0.018	301.167	0.822	0.5289996E-01	3.087748	0.1133064E-04	2.435387
08022011	09	0.083	0.041	0.164	0.000	0.001	0.003	0.002	0.006	0.025	0.009	0.018	302.240	0.773	NaN	9.609953	0.7359964E-01	-0.8841544
08022011	10	0.069	0.041	0.198	0.000	0.001	0.001	0.002	0.005	0.027	0.005	0.019	303.491	0.715	NaN	6.356667	0.1265550	-1.299050
08022011	11	0.045	0.047	0.223	0.000	0.000	0.001	0.002	0.005	0.034	0.003	0.023	303.992	0.687	NaN	4.591341	0.1778078	-1.588011
08022011	12	0.012	0.043	0.235	0.000	0.000	0.001	0.001	0.003	0.051	0.002	0.030	304.773	0.651	NaN	3.265837	0.2246582	-1.837528
08022011	13	0.005	0.055	0.279	0.000	0.000	0.001	0.001	0.003	0.063	0.001	0.040	306.196	0.605	0.2116799E-02	3.215810	0.7350989E-02	-0.3590553
08022011	14	0.002	0.067	0.289	0.000	0.000	0.001	0.001	0.004	0.059	0.000	0.052	307.381	0.549	0.8487701E-04	2.954670	0.3321290E-02	-0.5079780E-01
08022011	15	0.001	0.051	0.214	0.000	0.000	0.001	0.001	0.006	0.052	0.000	0.058	306.796	0.554	0.2735853E-04	3.352368	0.1881560E-02	0.2508336
08022011	16	0.002	0.048	0.293	0.000	0.000	0.002	0.001	0.005	0.076	0.000	0.063	306.557	0.554	0.1474619E-03	3.572020	0.4840900E-02	-0.1320123
08022011	17	0.002	0.051	0.342	0.000	0.000	0.002	0.002	0.006	0.078	0.000	0.070	306.728	0.552	0.1285672E-03	3.980145	0.3996640E-02	-0.1796132E-02
08022011	18	0.002	0.052	0.350	0.000	0.001	0.002	0.003	0.011	0.080	0.000	0.075	305.845	0.563	0.1720786E-03	4.095363	0.4827032E-02	-0.7138781E-01
08022011	19	0.001	0.047	0.315	0.000	0.001	0.002	0.002	0.008	0.079	0.000	0.076	304.383	0.571	0.1434684E-03	4.620101	0.3742968E-02	0.9143541E-01
08022011	20	0.001	0.051	0.257	0.000	0.001	0.002	0.001	0.005	0.081	0.000	0.076	302.438	0.635	0.2627969E-03	6.241727	0.4945061E-02	0.1011331
08022011	21	0.001	0.055	0.220	0.000	0.001	0.001	0.001	0.003	0.076	0.000	0.072	301.091	0.685	0.3290176E-03	7.308888	0.5900091E-02	0.9299254E-01
08022011	22	0.001	0.054	0.200	0.000	0.000	0.001	0.001	0.002	0.070	0.000	0.068	300.288	0.707	0.3299117E-03	7.612006	0.6277272E-02	0.8372821E-01
08022011	23	0.001	0.053	0.183	0.000	0.000	0.001	0.001	0.002	0.072	0.000	0.063	299.625	0.733	0.6089807E-03	7.460714	0.7001068E-02	0.2761615E-01
08022011	24	0.002	0.054	0.162	0.000	0.001	0.001	0.001	0.002	0.077	0.001	0.058	298.999	0.769	0.1778603E-02	7.829063	0.9185637E-02	-0.6939946E-01
08032011	01	0.003	0.058	0.141	0.000	0.001	0.001	0.001	0.002	0.081	0.001	0.052	298.394	0.812	0.7285357E-02	8.736798	0.7765841E-02	0.5116382E-01
08032011	02	0.004	0.068	0.124	0.000	0.001	0.001	0.001	0.002	0.083	0.002	0.047	297.963	0.841	0.2340508E-01	9.950784	0.7040026E-02	0.1502830
08032011	03	0.010	0.082	0.112	0.000	0.001	0.001	0.001	0.002	0.083	0.003	0.044	297.729	0.852	NaN	11.31213	0.8980539E-01	-0.8997580
08032011	04	0.019	0.102	0.107	0.000	0.001	0.001	0.001	0.002	0.082	0.005	0.043	297.566	0.859	NaN	13.46265	0.7384709E-01	-0.7392029
08032011	05	0.032	0.126	0.103	0.001	0.001	0.001	0.001	0.002	0.086	0.009	0.043	297.425	0.867	0.9719568E-01	12.27794	0.2567324E-03	1.679645
08032011	06	0.050	0.148	0.090	0.001	0.001	0.002	0.002	0.002	0.092	0.016	0.043	297.341	0.880	0.1877148	15.08810	0.1479330E-03	2.008569
08032011	07	0.067	0.158	0.075	0.002	0.001	0.003	0.002	0.003	0.094	0.021	0.043	298.328	0.877	0.2248684	15.20378	0.1034807E-03	2.167092
08032011	08	0.063	0.132	0.091	0.001	0.001	0.003	0.002	0.003	0.084	0.016	0.041	300.432	0.821	0.7630348E-01	8.191092	0.1158996E-03	1.849260
08032011	09	0.047	0.101	0.105	0.000	0.001	0.002	0.002	0.005	0.062	0.005	0.037	301.995	0.769	NaN	9.185215	0.4515077E-01	-0.6915758
08032011	10	0.028	0.122	0.117	0.000	0.001	0.002	0.003	0.009	0.051	0.002	0.038	304.642	0.650	NaN	4.267851	0.8435243E-01	-1.295888
08032011	11	0.000	0.333	0.117	0.000	0.000	0.001	0.001	0.005	0.037	0.000	0.062	306.866	0.553	0.3159046E-05	5.142435	0.1802291E-01	-0.5446562
08032011	12	0.000	0.360	0.120	0.000	0.000	0.000	0.001	0.004	0.027	0.000	0.075	308.303	0.494	0.1549721E-05	6.904554	0.4444723E-01	-0.8087091
08032011	13	0.000	0.287	0.104	0.000	0.000	0.000	0.001	0.004	0.031	0.000	0.071	309.630	0.444	0.5960464E-06	5.403064	0.3587669E-01	-0.8221722
08032011	14	0.000	0.213	0.086	0.000	0.001	0.000	0.001	0.004	0.034	0.000	0.065	310.115	0.431	0.3576279E-06	4.310439	0.2556516E-01	-0.7731271
08032011	15	0.000	0.166	0.077	0.000	0.001	0.000	0.001	0.004	0.038	0.000	0.060	309.803	0.439	0.2980232E-06	3.550695	0.1641162E-01	-0.6648380
08032011	16	0.000	0.122	0.070	0.000	0.001	0.001	0.001	0.004	0.042	0.000	0.059	309.165	0.453	0.4172325E-06	3.230033	0.9386396E-02	-0.4632920
08032011	17	0.000	0.103	0.067	0.000	0.001	0.001	0.001	0.004	0.047	0.000	0.062	308.346	0.467	0.7748604E-06	3.429716	0.7502408E-02	-0.3399425
08032011	18	0.001	0.094	0.065	0.000	0.001	0.001	0.002	0.006	0.059	0.000	0.062	307.414	0.489	0.2968311E-04	2.867281	0.1679524E-02	0.2322839
08032011	19	0.006	0.094	0.083	0.000	0.001	0.001	0.003	0.013	0.082	0.000	0.064	306.010	0.521	0.9572506E-03	3.229282	0.8364064E-02	-0.4133113
08032011	20	0.053	0.098	0.078	0.000	0.001	0.002	0.005	0.022	0.066	0.001	0.060	304.304	0.559	NaN	4.480143	0.1670660E-01	-0.5715963
08032011	21	0.081	0.099	0.062	0.000	0.002	0.002	0.006	0.025	0.039	0.001	0.050	303.076	0.594	NaN	4.231516	0.1500104E-03	1.450375
08032011	22	0.088	0.102	0.043	0.000	0.002	0.002	0.005	0.024	0.020	0.001	0.038	302.146	0.629	NaN	3.163098	0.3180984E-04	1.997551
08032011	23	0.083	0.105	0.031	0.000	0.001	0.002	0.005	0.021	0.012	0.001	0.031	301.403	0.669	NaN	2.684527	0.1956899E-04	2.137299
08032011	24	0.071	0.109	0.027	0.000	0.001	0.001	0.004	0.019	0.015	0.001	0.030	300.984	0.690	NaN	2.762933	0.3291810E-04	1.923936
08042011	01	0.060	0.105	0.026	0.000	0.001	0.001	0.004	0.017	0.021	0.001	0.031	300.272	0.739	NaN	3.766396	0.6440671E-04	1.766995
08042011	02	0.054	0.096	0.026	0.000	0.001	0.001	0.004	0.016	0.025	0.001	0.032	299.841	0.769	NaN	4.632656	0.9668365E-04	1.680477
08042011	03	0.050	0.093	0.026	0.000	0.001	0.001	0.004	0.016	0.027	0.001	0.033	299.469	0.793	NaN	5.288386	0.1238374E-03	1.630471
08042011	04	0.053	0.100	0.027	0.000	0.001	0.001	0.005	0.017	0.027	0.001	0.034	299.237	0.805	NaN	6.008644	0.1093787E-03	1.739844
08042011	05	0.067	0.119	0.028	0.000	0.002	0.002	0.005	0.020	0.023	0.002	0.035	298.998	0.820	NaN	6.307118	0.5417641E-04	2.066021
08042011	06	0.095	0.148	0.025	0.000	0.002	0.003	0.006	0.025	0.011	0.003	0.035	298.733	0.837	NaN	5.906725	0.1957009E-04	2.479754
08042011	07	0.108	0.173	0.024	0.000	0.002	0.004	0.008	0.031	0.003	0.002	0.034	299.075	0.845	NaN	4.386836	0.1525850E-04	2.458639
08042011	08	0.079	0.177	0.039	0.000	0.003	0.004	0.008	0.030	0.002	0.002	0.031	300.294	0.815	NaN	4.852787	0.6795510E-04	1.853769
08042011	09	0.044	0.196	0.048	0.000	0.002	0.002	0.005	0.017	0.008	0.002	0.025	301.468	0.772	NaN	5.059726	0.1937263E-02	0.4169383
08042011	10	0.030	0.227	0.069	0.000	0.002	0.001	0.003	0.013	0.015	0.001	0.024	302.672	0.733	NaN	3.451036	0.3584258E-01	-1.016450
08042011	11	0.017	0.275	0.085	0.000	0.001	0.001	0.003	0.010	0.028	0.001	0.026	303.435	0.710	NaN	3.095098	0.6411153E-01	-1.316262
08042011	12	0.010	0.243	0.095	0.000	0.001	0.001	0.002	0.009	0.036	0.000	0.029	303.855	0.698	NaN	3.006072	0.8190085E-01	-1.435289
08042011	13	0.005	0.176	0.075	0.000	0.001	0.001	0.002	0.008	0.036	0.000	0.028	304.108	0.692	0.9106040E-02	3.663871	0.6144680E-02	-0.2245591
08042011	14	0.003	0.129	0.058	0.000	0.001	0.001	0.002	0.007	0.037	0.000	0.032	303.850	0.699	0.1524091E-02	2.821012	0.4919902E-02	-0.2415515
08042011	15	0.002	0.108	0.054	0.000	0.001	0.001	0.002	0.007	0.042	0.000	0.041	302.768	0.718	0.5059838E-03	3.913071	0.4682165E-02	-0.7792903E-01
08042011	16	0.001	0.097	0.059	0.000	0.001	0.001	0.002	0.008	0.048	0.000	0.052	301.315	0.751	0.5081892E-03	5.928316	0.5132584E-02	0.6259529E-01
08042011	17	0.002	0.097	0.062	0.000	0.001	0.001	0.003	0.011	0.061	0.000	0.061	300.321	0.779	0.1296580E-02	7.465324	0.6868784E-02	0.3616878E-01
08042011	18	0.002	0.103	0.053	0.000	0.001	0.002	0.004	0.015	0.074	0.001	0.073	299.678	0.801	0.2586722E-02	9.455054	0.8059648E-02	0.6934796E-01
08042011	19	0.001	0.104	0.043	0.000	0.001	0.002	0.004	0.017	0.083	0.001	0.088	299.160	0.817	0.2703309E-02	13.12200	0.9953571E-02	0.1200210
08042011	20	0.001	0.058	0.030	0.000	0.001	0.001	0.004	0.015	0.084	0.001	0.088	297.857	0.877	0.6495595E-02	19.93079	0.1269639E-01	0.1958441
08042011	21	0.002	0.034	0.023	0.001	0.001	0.001	0.003	0.011	0.088	0.001	0.079	297.117	0.917	0.000000	26.88973	0.1104057E-01	0.3865950
08042011	22	0.002	0.041	0.022	0.001	0.001	0.001	0.003	0.008	0.092	0.001	0.080	296.802	0.932	0.000000	32.59571	0.1222516E-01	0.4259059
08042011	23	0.002	0.046	0.018	0.001	0.001	0.001	0.003	0.008	0.098	0.001	0.083	296.645	0.930	0.000000	33.85919	0.1233944E-01	0.4383811
08042011	24	0.002	0.049	0.016	0.001	0.001	0.001	0.003	0.008	0.101	0.001	0.081	296.477	0.936	0.000000	38.44048	0.1116665E-01	0.5368659
08052011	01	0.003	0.052	0.017	0.001	0.001	0.001	0.003	0.009	0.105	0.002	0.079	296.426	0.922	0.000000	27.59508	0.9191310E-02	0.4774542
08052011	02	0.004	0.053	0.017	0.001	0.001	0.001	0.003	0.009	0.108	0.002	0.074	296.270	0.925	0.000000	29.78332	0.7135130E-02	0.6205712
08052011	03	0.005	0.053	0.016	0.001	0.002	0.001	0.003	0.009	0.109	0.003	0.070	296.168	0.931	0.000000	28.37420	0.5730089E-02	0.6947623
08052011	04	0.011	0.054	0.015	0.001	0.002	0.001	0.004	0.010	0.108	0.004	0.066	296.152	0.932	0.1545200	26.41266	0.5743278E-03	1.662652
08052011	05	0.028	0.057	0.014	0.001	0.002	0.002	0.004	0.010	0.099	0.006	0.061	296.155	0.933	0.2805615	25.50374	0.2349762E-03	2.035580
08052011	06	0.051	0.063	0.012	0.002	0.002	0.003	0.004	0.011	0.089	0.008	0.057	296.212	0.933	0.3956264	24.25834	0.1186896E-03	2.310448
08052011	07	0.070	0.071	0.014	0.002	0.002	0.004	0.005	0.012	0.080	0.012	0.052	297.126	0.925	0.4266515	22.67493	0.7388931E-04	2.486964
08052011	08	0.063	0.066	0.036	0.001	0.002	0.004	0.005	0.016	0.064	0.013	0.048	298.905	0.872	0.1618071	9.581228	0.6484218E-04	2.169564
08052011	09	0.039	0.054	0.069	0.000	0.002	0.003	0.005	0.017	0.042	0.005	0.041	300.398	0.809	NaN	9.289029	0.1790636E-01	-0.2850370
08052011	10	0.023	0.052	0.107	0.000	0.001	0.002	0.004	0.014	0.038	0.002	0.036	302.635	0.713	NaN	4.282525	0.7855336E-01	-1.263465
08052011	11	0.005	0.073	0.145	0.000	0.001	0.001	0.003	0.010	0.041	0.000	0.035	304.826	0.628	0.4831016E-02	2.742239	0.5934479E-02	-0.3352773
08052011	12	0.001	0.117	0.163	0.000	0.001	0.001	0.002	0.008	0.035	0.000	0.038	306.219	0.582	0.9119511E-04	2.092200	0.2736141E-02	-0.1165352
08052011	13	0.001	0.129	0.154	0.000	0.001	0.001	0.002	0.008	0.032	0.000	0.042	307.601	0.537	0.2485514E-04	2.141005	0.1439710E-02	0.1723427
08052011	14	0.000	0.122	0.140	0.000	0.001	0.001	0.002	0.007	0.032	0.000	0.045	307.539	0.518	0.3218651E-05	2.421632	0.2072132E-02	0.6769065E-01
08052011	15	0.000	0.079	0.105	0.000	0.000	0.001	0.002	0.006	0.030	0.000	0.044	308.049	0.517	0.1609325E-05	2.646265	0.4610391E-02	-0.2411045
08052011	16	0.000	0.057	0.095	0.000	0.000	0.001	0.002	0.006	0.031	0.000	0.046	307.710	0.523	0.1668930E-05	2.837980	0.5593778E-02	-0.2946959
08052011	17	0.000	0.046	0.092	0.000	0.000	0.001	0.002	0.006	0.035	0.000	0.047	306.649	0.545	0.4947186E-05	2.946053	0.3145389E-02	-0.2843379E-01
08052011	18	0.003	0.038	0.099	0.000	0.001	0.001	0.003	0.011	0.049	0.000	0.047	305.701	0.575	0.2172589E-03	2.395325	0.5303875E-02	-0.3452288
08052011	19	0.014	0.028	0.088	0.000	0.001	0.002	0.003	0.014	0.051	0.001	0.043	302.725	0.660	0.1548898E-01	6.149647	0.8137999E-02	-0.1216675
08052011	20	0.029	0.029	0.063	0.000	0.001	0.002	0.004	0.014	0.041	0.001	0.038	301.269	0.702	NaN	4.628014	0.2527715E-01	-0.7373334
08052011	21	0.027	0.035	0.056	0.000	0.001	0.001	0.003	0.009	0.048	0.001	0.035	300.369	0.697	NaN	4.696141	0.2092571E-01	-0.6489391
08052011	22	0.043	0.040	0.058	0.000	0.001	0.001	0.003	0.007	0.047	0.001	0.034	299.583	0.720	NaN	6.002471	0.1062665E-01	-0.2480663
08052011	23	0.063	0.042	0.054	0.000	0.001	0.002	0.003	0.009	0.040	0.002	0.031	298.844	0.754	NaN	7.210154	0.2830000E-03	1.406158
08052011	24	0.078	0.043	0.044	0.000	0.001	0.002	0.004	0.010	0.032	0.003	0.029	298.237	0.784	NaN	7.147103	0.8666371E-04	1.916293
08062011	01	0.087	0.042	0.035	0.001	0.001	0.002	0.004	0.011	0.026	0.003	0.027	297.665	0.815	0.7847804E-01	3.411977	0.2343132E-04	2.163209
08062011	02	0.092	0.041	0.029	0.001	0.001	0.002	0.004	0.011	0.022	0.004	0.025	297.272	0.837	0.9555882E-01	3.406918	0.1694913E-04	2.303214
08062011	03	0.093	0.040	0.024	0.001	0.001	0.002	0.004	0.011	0.019	0.004	0.023	297.059	0.854	0.1004757	3.118932	0.1232400E-04	2.403254
08062011	04	0.094	0.039	0.020	0.001	0.001	0.002	0.004	0.011	0.017	0.004	0.022	296.922	0.869	0.1210079	3.327008	0.1048912E-04	2.501315
08062011	05	0.096	0.039	0.018	0.001	0.001	0.002	0.004	0.010	0.016	0.004	0.020	296.839	0.881	0.1348560	3.327633	0.8539931E-05	2.590681
08062011	06	0.097	0.043	0.018	0.001	0.001	0.002	0.004	0.010	0.018	0.004	0.021	296.830	0.892	0.1590770	4.034215	0.1030997E-04	2.592501
08062011	07	0.098	0.049	0.024	0.001	0.001	0.002	0.005	0.009	0.022	0.006	0.022	297.804	0.884	0.1351779	4.347948	0.1336575E-04	2.512291
08062011	08	0.079	0.049	0.047	0.001	0.001	0.002	0.005	0.009	0.030	0.008	0.025	299.493	0.849	0.6785107E-01	4.125456	0.2565759E-04	2.206256
08062011	09	0.041	0.039	0.072	0.000	0.001	0.002	0.004	0.006	0.044	0.005	0.030	300.522	0.828	NaN	10.46658	0.2033681E-01	-0.2884782
08062011	10	0.012	0.027	0.072	0.000	0.000	0.001	0.002	0.003	0.048	0.002	0.029	301.379	0.802	NaN	5.670541	0.5454875E-01	-0.9831603
08062011	11	0.002	0.022	0.072	0.000	0.000	0.001	0.001	0.002	0.046	0.000	0.034	302.304	0.770	0.1331568E-02	4.516825	0.5485259E-02	-0.8436395E-01
08062011	12	0.001	0.024	0.083	0.000	0.000	0.001	0.001	0.002	0.042	0.000	0.039	303.336	0.744	0.3665686E-03	4.754866	0.4339220E-02	0.3972658E-01
08062011	13	0.001	0.025	0.094	0.000	0.000	0.001	0.001	0.003	0.041	0.000	0.046	304.273	0.715	0.1376867E-03	5.260851	0.4549726E-02	0.6307074E-01
08062011	14	0.000	0.024	0.090	0.000	0.000	0.001	0.001	0.003	0.036	0.000	0.053	305.674	0.661	0.1978874E-04	5.893749	0.1296880E-01	-0.3425082
08062011	15	0.000	0.020	0.075	0.000	0.000	0.001	0.001	0.004	0.034	0.000	0.054	303.762	0.679	0.2944469E-04	6.452324	0.1526199E-01	-0.3738950
08062011	16	0.001	0.025	0.101	0.000	0.000	0.001	0.002	0.008	0.044	0.000	0.052	302.875	0.732	0.2465248E-03	5.536193	0.4492407E-02	0.9073220E-01
08062011	17	0.001	0.027	0.092	0.000	0.000	0.001	0.002	0.007	0.040	0.000	0.049	302.055	0.765	0.3290176E-03	6.321129	0.5527945E-02	0.5823096E-01
08062011	18	0.002	0.035	0.117	0.000	0.001	0.001	0.003	0.010	0.050	0.000	0.049	301.138	0.799	0.1644790E-02	6.317846	0.5993224E-02	0.2290851E-01
08062011	19	0.002	0.038	0.106	0.000	0.001	0.001	0.003	0.011	0.050	0.000	0.048	300.129	0.836	0.3386676E-02	7.391488	0.6080767E-02	0.8477353E-01
08062011	20	0.002	0.041	0.098	0.000	0.001	0.001	0.003	0.011	0.051	0.001	0.047	299.258	0.869	0.6522417E-02	8.861850	0.6095183E-02	0.1625376
08062011	21	0.003	0.043	0.107	0.000	0.001	0.002	0.003	0.012	0.054	0.001	0.048	298.434	0.897	0.1608539E-01	11.54909	0.6210128E-02	0.2694472
08062011	22	0.002	0.046	0.116	0.000	0.001	0.001	0.003	0.011	0.052	0.001	0.051	297.848	0.918	0.1203698E-01	15.68105	0.7685874E-02	0.3096818
08062011	23	0.002	0.049	0.109	0.000	0.001	0.001	0.003	0.011	0.056	0.002	0.054	297.488	0.929	0.1607072E-01	19.27024	0.8535363E-02	0.3536652
08062011	24	0.002	0.052	0.098	0.000	0.001	0.001	0.003	0.011	0.058	0.002	0.054	297.246	0.939	0.2280933E-01	22.57047	0.8737665E-02	0.4121453
08072011	01	0.002	0.052	0.086	0.000	0.001	0.001	0.003	0.010	0.059	0.003	0.052	297.068	0.949	0.3268057E-01	26.63464	0.8820845E-02	0.4799366
08072011	02	0.003	0.050	0.073	0.000	0.001	0.001	0.003	0.010	0.061	0.003	0.049	296.973	0.953	0.4440510E-01	25.17600	0.7691971E-02	0.5149491
08072011	03	0.003	0.050	0.064	0.000	0.001	0.001	0.003	0.010	0.061	0.004	0.043	296.937	0.952	0.6672353E-01	26.96995	0.7630548E-02	0.5483245
08072011	04	0.008	0.052	0.059	0.000	0.001	0.001	0.003	0.010	0.056	0.006	0.038	296.926	0.948	NaN	25.96393	0.3375695E-01	-0.1139926
08072011	05	0.015	0.057	0.056	0.001	0.001	0.001	0.003	0.011	0.051	0.008	0.036	296.926	0.945	0.1351513	20.60697	0.2688393E-03	1.884521
08072011	06	0.024	0.066	0.056	0.001	0.001	0.001	0.004	0.014	0.047	0.010	0.036	296.961	0.944	0.1629735	16.50834	0.1417934E-03	2.066047
08072011	07	0.035	0.078	0.053	0.001	0.001	0.002	0.005	0.017	0.042	0.012	0.036	297.994	0.925	0.1629801	12.61050	0.7222168E-04	2.242065
08072011	08	0.042	0.075	0.052	0.000	0.001	0.002	0.005	0.019	0.032	0.006	0.037	300.303	0.853	NaN	10.87422	0.5144083E-02	0.3250902
08072011	09	0.010	0.118	0.057	0.000	0.001	0.001	0.003	0.011	0.045	0.001	0.039	301.938	0.800	0.1906842E-01	6.547466	0.6351303E-02	0.1321043E-01
08072011	10	0.001	0.198	0.060	0.000	0.001	0.001	0.002	0.007	0.041	0.000	0.046	303.096	0.756	0.4356503E-03	5.523761	0.4680702E-02	0.7192381E-01
08072011	11	0.000	0.130	0.057	0.000	0.001	0.001	0.002	0.006	0.036	0.000	0.051	303.285	0.731	0.9632111E-04	6.245922	0.7933194E-02	-0.1038515
08072011	12	0.000	0.062	0.054	0.000	0.000	0.001	0.002	0.005	0.033	0.000	0.058	304.030	0.718	0.5298853E-04	8.022316	0.1882542E-01	-0.3704450
08072011	13	0.000	0.043	0.054	0.000	0.000	0.001	0.001	0.005	0.031	0.000	0.056	305.060	0.700	0.3308058E-04	7.349633	0.1937473E-01	-0.4209701
08072011	14	0.000	0.032	0.053	0.000	0.000	0.001	0.001	0.004	0.028	0.000	0.049	305.388	0.689	0.2533197E-04	6.214290	0.1600429E-01	-0.4108450
08072011	15	0.000	0.026	0.050	0.000	0.000	0.001	0.001	0.004	0.026	0.000	0.044	305.386	0.682	0.2056360E-04	5.246809	0.1274032E-01	-0.3852853
08072011	16	0.000	0.025	0.045	0.000	0.000	0.001	0.001	0.004	0.024	0.000	0.039	305.301	0.677	0.2002716E-04	4.473732	0.9623367E-02	-0.3326572
08072011	17	0.000	0.017	0.030	0.000	0.000	0.000	0.001	0.003	0.020	0.000	0.030	304.749	0.676	0.1412630E-04	3.319702	0.7338965E-02	-0.3445358
08072011	18	0.001	0.017	0.024	0.000	0.000	0.001	0.001	0.005	0.023	0.000	0.027	304.301	0.667	0.1112223E-03	2.186516	0.2199214E-02	-0.2514878E-02
08072011	19	0.010	0.031	0.029	0.000	0.001	0.001	0.003	0.010	0.030	0.000	0.030	303.424	0.673	0.1430953E-01	3.420647	0.5725848E-02	-0.2237315
08072011	20	0.030	0.052	0.027	0.000	0.001	0.002	0.004	0.016	0.027	0.001	0.034	302.337	0.698	NaN	3.643237	0.7345427E-03	0.6954704
08072011	21	0.026	0.061	0.019	0.001	0.001	0.002	0.004	0.014	0.031	0.001	0.033	301.480	0.725	0.1285589E-01	2.545272	0.7653832E-04	1.521855
08072011	22	0.022	0.077	0.015	0.001	0.001	0.002	0.003	0.011	0.031	0.001	0.030	301.074	0.718	0.1446962E-01	2.472940	0.7439968E-04	1.521643
08072011	23	0.021	0.082	0.014	0.001	0.001	0.001	0.003	0.010	0.030	0.001	0.028	300.484	0.749	0.1583755E-01	2.545755	0.8188513E-04	1.492612
08072011	24	0.019	0.079	0.014	0.001	0.001	0.001	0.003	0.011	0.030	0.001	0.029	299.886	0.788	0.1846248E-01	2.982853	0.9160560E-04	1.512710
08082011	01	0.017	0.077	0.014	0.001	0.001	0.001	0.003	0.012	0.032	0.001	0.030	299.428	0.814	0.2025020E-01	3.262943	0.9874348E-04	1.519101
08082011	02	0.017	0.079	0.015	0.001	0.001	0.001	0.003	0.013	0.035	0.001	0.033	299.035	0.831	0.2404094E-01	4.001685	0.1239870E-03	1.508867
08082011	03	0.017	0.089	0.017	0.001	0.001	0.001	0.004	0.014	0.039	0.001	0.036	298.706	0.837	0.2717930E-01	4.642551	0.1582904E-03	1.467302
08082011	04	0.024	0.106	0.018	0.000	0.001	0.001	0.004	0.015	0.040	0.001	0.039	298.413	0.837	NaN	7.328698	0.7021044E-03	1.018625
08082011	05	0.042	0.127	0.020	0.001	0.002	0.001	0.005	0.018	0.036	0.002	0.040	298.142	0.835	0.4815245E-01	4.751635	0.8558753E-04	1.744433
08082011	06	0.071	0.149	0.019	0.001	0.002	0.003	0.005	0.022	0.027	0.002	0.041	297.876	0.835	0.8527166E-01	4.306922	0.3030777E-04	2.152613
08082011	07	0.085	0.159	0.020	0.001	0.002	0.004	0.006	0.026	0.021	0.003	0.043	298.365	0.814	0.8277082E-01	3.393747	0.1639617E-04	2.315937
08082011	08	0.053	0.132	0.032	0.001	0.002	0.003	0.005	0.022	0.034	0.003	0.045	300.119	0.759	0.2688926E-01	3.525081	0.7220673E-04	1.688591
08082011	09	0.011	0.098	0.041	0.000	0.001	0.002	0.003	0.012	0.046	0.001	0.039	302.116	0.709	0.2191526E-01	6.012188	0.6999218E-02	-0.6601699E-01
08082011	10	0.001	0.109	0.048	0.000	0.001	0.001	0.002	0.006	0.035	0.000	0.034	304.176	0.653	0.2245307E-03	2.474894	0.3685497E-02	-0.1729395
08082011	11	0.001	0.110	0.052	0.000	0.001	0.000	0.001	0.004	0.029	0.000	0.032	305.711	0.612	0.4059076E-04	2.192338	0.1875853E-02	0.6770875E-01
08082011	12	0.001	0.080	0.045	0.000	0.000	0.000	0.001	0.003	0.026	0.000	0.029	306.890	0.583	0.1674891E-04	1.819200	0.1400626E-02	0.1135581
08082011	13	0.001	0.079	0.041	0.000	0.000	0.000	0.001	0.003	0.027	0.000	0.026	307.860	0.557	0.3182888E-04	1.441885	0.1794335E-02	-0.9497286E-01
08082011	14	0.002	0.085	0.040	0.000	0.000	0.000	0.001	0.003	0.028	0.000	0.023	308.048	0.543	0.5376339E-04	1.129800	0.3343985E-02	-0.4712627
08082011	15	0.003	0.093	0.039	0.000	0.000	0.000	0.001	0.003	0.027	0.000	0.021	307.234	0.556	0.1567006E-03	1.191495	0.4326180E-02	-0.5600123
08082011	16	0.004	0.094	0.038	0.000	0.000	0.000	0.001	0.003	0.027	0.000	0.021	306.007	0.595	0.3393888E-03	1.394037	0.4449505E-02	-0.5040373
08082011	17	0.004	0.101	0.039	0.000	0.000	0.001	0.001	0.004	0.029	0.000	0.022	304.419	0.649	0.6330967E-02	1.837691	0.4423937E-02	-0.3815364
08082011	18	0.005	0.097	0.034	0.000	0.000	0.001	0.001	0.006	0.031	0.000	0.024	302.795	0.703	0.1129001E-01	2.849424	0.4892362E-02	-0.2347616
08082011	19	0.015	0.113	0.036	0.000	0.001	0.001	0.002	0.010	0.035	0.001	0.029	301.155	0.752	NaN	3.921132	0.1419593E-01	-0.5587524
08082011	20	0.028	0.125	0.036	0.000	0.001	0.001	0.003	0.014	0.031	0.001	0.032	299.961	0.787	NaN	5.599236	0.4363125E-02	0.1083311
08082011	21	0.042	0.136	0.037	0.000	0.001	0.002	0.004	0.019	0.024	0.001	0.034	299.165	0.809	NaN	6.695650	0.3434127E-03	1.289976
08082011	22	0.053	0.142	0.036	0.000	0.001	0.002	0.005	0.024	0.014	0.002	0.035	298.574	0.829	NaN	6.875336	0.1207660E-03	1.755349
08082011	23	0.050	0.142	0.030	0.000	0.001	0.002	0.005	0.024	0.012	0.002	0.034	298.121	0.842	NaN	6.377908	0.9074305E-04	1.846865
08082011	24	0.048	0.127	0.021	0.001	0.001	0.001	0.005	0.022	0.009	0.002	0.030	297.752	0.853	0.3340560E-01	1.880339	0.1207765E-04	2.192254
08092011	01	0.041	0.110	0.016	0.001	0.001	0.001	0.005	0.020	0.007	0.002	0.026	297.429	0.861	0.3538632E-01	1.509457	0.5832692E-05	2.412952
08092011	02	0.031	0.104	0.016	0.001	0.001	0.001	0.004	0.018	0.008	0.001	0.025	297.130	0.871	0.2646804E-01	1.841111	0.1528115E-04	2.080924
08092011	03	0.024	0.104	0.018	0.000	0.001	0.001	0.004	0.016	0.011	0.001	0.024	296.938	0.877	NaN	5.753661	0.1874472E-03	1.487065
08092011	04	0.024	0.105	0.022	0.000	0.001	0.001	0.004	0.016	0.011	0.001	0.024	296.840	0.882	NaN	6.423395	0.3969965E-03	1.208978
08092011	05	0.034	0.105	0.025	0.000	0.001	0.001	0.004	0.018	0.010	0.002	0.026	296.791	0.887	NaN	8.076644	0.2250203E-03	1.555009
08092011	06	0.053	0.109	0.025	0.001	0.001	0.002	0.005	0.022	0.008	0.004	0.030	296.765	0.889	0.8777273E-01	2.907721	0.8551254E-05	2.531523
08092011	07	0.067	0.116	0.027	0.001	0.002	0.004	0.006	0.028	0.006	0.006	0.035	297.494	0.870	0.1368746	2.605366	0.2708065E-05	2.983210
08092011	08	0.048	0.116	0.047	0.001	0.002	0.003	0.006	0.025	0.011	0.005	0.035	299.338	0.809	0.3475016E-01	2.081543	0.8874170E-05	2.370258
08092011	09	0.013	0.146	0.049	0.000	0.001	0.001	0.003	0.012	0.026	0.001	0.027	301.055	0.758	NaN	3.367230	0.3029459E-01	-0.9540923
08092011	10	0.004	0.164	0.042	0.000	0.001	0.001	0.002	0.006	0.028	0.000	0.022	302.546	0.717	0.1166666E-01	3.298687	0.5012292E-02	-0.1816953
08092011	11	0.002	0.131	0.042	0.000	0.001	0.000	0.001	0.005	0.027	0.000	0.024	303.880	0.671	0.2952814E-03	1.798821	0.4040073E-02	-0.3514012
08092011	12	0.001	0.082	0.045	0.000	0.001	0.000	0.001	0.005	0.025	0.000	0.028	302.897	0.679	0.1043081E-03	2.314067	0.2440756E-02	-0.2314854E-01
08092011	13	0.002	0.064	0.063	0.000	0.001	0.001	0.002	0.009	0.030	0.000	0.032	303.958	0.672	0.3868341E-03	2.210246	0.4017419E-02	-0.2595065
08092011	14	0.001	0.068	0.057	0.000	0.001	0.001	0.001	0.006	0.023	0.000	0.030	305.936	0.610	0.5024672E-04	1.962850	0.1741415E-02	0.5198477E-01
08092011	15	0.000	0.065	0.039	0.000	0.000	0.000	0.001	0.004	0.018	0.000	0.023	305.377	0.590	0.6198883E-05	1.415197	0.1284006E-02	0.4224958E-01
08092011	16	0.001	0.065	0.036	0.000	0.000	0.000	0.001	0.004	0.017	0.000	0.020	304.719	0.593	0.2521276E-04	1.133673	0.1209836E-02	-0.2823857E-01
08092011	17	0.001	0.069	0.035	0.000	0.000	0.000	0.001	0.004	0.018	0.000	0.019	303.758	0.621	0.5275011E-04	1.155954	0.1797955E-02	-0.1918382
08092011	18	0.006	0.074	0.033	0.000	0.000	0.001	0.002	0.007	0.019	0.000	0.019	302.587	0.652	0.9252310E-02	2.217573	0.4483776E-02	-0.3057660
08092011	19	0.025	0.080	0.036	0.000	0.001	0.001	0.003	0.012	0.010	0.000	0.020	301.563	0.672	NaN	2.094038	0.7908640E-02	-0.5771172
08092011	20	0.048	0.091	0.034	0.000	0.001	0.002	0.005	0.023	0.001	0.000	0.021	300.550	0.705	NaN	2.012661	0.6652859E-04	1.480762
08092011	21	0.052	0.084	0.030	0.000	0.001	0.002	0.005	0.025	0.001	0.001	0.024	299.769	0.728	NaN	2.036452	0.4592404E-04	1.646834
08092011	22	0.049	0.065	0.022	0.001	0.001	0.002	0.004	0.021	0.001	0.001	0.024	299.121	0.752	0.2386278E-01	0.4583746	0.4113991E-06	3.046957
08092011	23	0.040	0.047	0.015	0.001	0.001	0.001	0.003	0.015	0.009	0.001	0.023	298.518	0.781	0.1297373E-01	1.301524	0.2358340E-04	1.741846
08092011	24	0.032	0.036	0.011	0.001	0.001	0.001	0.003	0.011	0.016	0.000	0.021	298.356	0.773	0.1224339E-01	1.542845	0.4196330E-04	1.565453
08102011	01	0.026	0.035	0.009	0.001	0.001	0.001	0.002	0.009	0.020	0.000	0.021	297.784	0.805	0.1889092E-01	2.194620	0.5780481E-04	1.579395
08102011	02	0.023	0.037	0.007	0.001	0.001	0.001	0.002	0.008	0.022	0.000	0.021	297.361	0.821	0.2443224E-01	2.490629	0.5895737E-04	1.625771
08102011	03	0.022	0.040	0.008	0.001	0.002	0.001	0.003	0.009	0.023	0.000	0.023	296.940	0.840	0.2708685E-01	2.979674	0.7227854E-04	1.615159
08102011	04	0.025	0.045	0.009	0.001	0.002	0.001	0.003	0.010	0.021	0.001	0.023	296.602	0.854	0.2967423E-01	2.944017	0.6246790E-04	1.673283
08102011	05	0.035	0.052	0.011	0.001	0.002	0.001	0.003	0.013	0.015	0.001	0.023	296.272	0.867	0.4420179E-01	2.641167	0.2802788E-04	1.974206
08102011	06	0.053	0.061	0.011	0.001	0.002	0.002	0.004	0.016	0.005	0.002	0.023	295.919	0.884	0.9590030E-01	2.175811	0.5106615E-05	2.629488
08102011	07	0.059	0.070	0.014	0.001	0.002	0.003	0.005	0.020	0.002	0.002	0.023	296.250	0.885	0.9326822E-01	1.187956	0.1002142E-05	3.073871
08102011	08	0.045	0.063	0.031	0.001	0.002	0.003	0.005	0.018	0.003	0.003	0.021	298.058	0.830	0.3063333E-01	0.6873001	0.8278468E-06	2.919196
08102011	09	0.020	0.049	0.047	0.000	0.001	0.001	0.003	0.010	0.016	0.001	0.021	300.150	0.743	NaN	2.899837	0.2421623E-01	-0.9217330
08102011	10	0.003	0.057	0.064	0.000	0.001	0.001	0.002	0.006	0.028	0.000	0.023	302.006	0.666	0.6912112E-02	2.272933	0.4275778E-02	-0.2744285
08102011	11	0.001	0.076	0.076	0.000	0.001	0.001	0.001	0.005	0.028	0.000	0.027	303.743	0.601	0.1264811E-03	1.643052	0.3184234E-02	-0.2873537
08102011	12	0.001	0.085	0.077	0.000	0.001	0.001	0.001	0.005	0.029	0.000	0.030	305.163	0.553	0.5978346E-04	1.595196	0.2213816E-02	-0.1423275
08102011	13	0.001	0.092	0.072	0.000	0.001	0.000	0.001	0.005	0.031	0.000	0.034	306.316	0.518	0.1955032E-04	1.626963	0.1319792E-02	0.9087227E-01
08102011	14	0.001	0.093	0.062	0.000	0.000	0.000	0.001	0.004	0.033	0.000	0.035	307.069	0.486	0.1162291E-04	1.539599	0.1036877E-02	0.1716805
08102011	15	0.001	0.083	0.051	0.000	0.000	0.000	0.001	0.004	0.035	0.000	0.031	306.942	0.474	0.2127886E-04	1.186510	0.1950996E-02	-0.2159850
08102011	16	0.003	0.072	0.042	0.000	0.000	0.000	0.001	0.004	0.035	0.000	0.026	306.356	0.475	0.1451373E-03	1.156413	0.5095824E-02	-0.6441013
08102011	17	0.005	0.068	0.038	0.000	0.000	0.000	0.001	0.004	0.034	0.000	0.024	305.558	0.485	0.4403949E-02	1.228726	0.4923662E-02	-0.6028333
08102011	18	0.015	0.077	0.042	0.000	0.000	0.001	0.002	0.007	0.032	0.000	0.025	304.571	0.504	NaN	1.496722	0.2362763E-01	-1.198279
08102011	19	0.054	0.092	0.062	0.000	0.001	0.002	0.004	0.018	0.013	0.000	0.027	303.075	0.534	NaN	2.145814	0.2064779E-02	0.1671851E-01
08102011	20	0.085	0.105	0.073	0.000	0.001	0.002	0.006	0.030	0.001	0.000	0.029	301.670	0.562	NaN	2.142055	0.4160204E-04	1.711716
08102011	21	0.091	0.103	0.074	0.000	0.001	0.002	0.006	0.029	0.001	0.000	0.029	300.625	0.586	NaN	2.496230	0.3670925E-04	1.832509
08102011	22	0.092	0.096	0.072	0.000	0.001	0.002	0.006	0.027	0.001	0.001	0.029	299.767	0.609	NaN	2.794571	0.2925497E-04	1.980116
08102011	23	0.089	0.084	0.069	0.000	0.001	0.002	0.005	0.024	0.002	0.002	0.028	298.991	0.639	NaN	3.388899	0.3278766E-04	2.014348
08102011	24	0.085	0.072	0.063	0.000	0.001	0.002	0.005	0.022	0.004	0.002	0.027	298.269	0.678	NaN	3.939895	0.3573492E-04	2.042392
08112011	01	0.077	0.061	0.051	0.000	0.001	0.001	0.005	0.020	0.007	0.002	0.027	297.703	0.722	NaN	4.190181	0.4309853E-04	1.987770
08112011	02	0.070	0.055	0.036	0.000	0.001	0.001	0.005	0.019	0.009	0.002	0.026	297.388	0.750	NaN	3.771240	0.2811893E-04	2.127485
08112011	03	0.064	0.054	0.027	0.000	0.001	0.001	0.005	0.018	0.011	0.001	0.026	297.246	0.764	NaN	3.340355	0.2395216E-04	2.144448
08112011	04	0.066	0.060	0.023	0.000	0.001	0.001	0.005	0.017	0.012	0.001	0.026	297.167	0.770	NaN	3.339644	0.2301235E-04	2.161739
08112011	05	0.074	0.069	0.022	0.000	0.001	0.001	0.004	0.017	0.013	0.001	0.026	297.113	0.773	NaN	3.269100	0.2002627E-04	2.212828
08112011	06	0.102	0.083	0.021	0.001	0.001	0.002	0.006	0.021	0.005	0.002	0.027	297.053	0.781	0.8849692E-01	1.179246	0.9212877E-06	3.107209
08112011	07	0.125	0.099	0.024	0.000	0.001	0.004	0.007	0.030	0.002	0.001	0.028	297.659	0.800	NaN	2.486304	0.1264610E-04	2.293597
08112011	08	0.112	0.105	0.044	0.000	0.002	0.004	0.009	0.038	0.002	0.002	0.029	300.182	0.721	NaN	2.870093	0.2111079E-04	2.133392
08112011	09	0.078	0.104	0.069	0.000	0.001	0.003	0.006	0.025	0.008	0.002	0.028	301.912	0.652	NaN	3.343569	0.6405726E-04	1.717642
08112011	10	0.032	0.191	0.080	0.000	0.001	0.001	0.003	0.012	0.035	0.001	0.032	303.564	0.599	NaN	2.899585	0.4326245E-01	-1.173775
08112011	11	0.005	0.190	0.086	0.000	0.000	0.001	0.002	0.007	0.043	0.000	0.033	304.610	0.570	0.4948795E-02	2.063968	0.5446313E-02	-0.4213996
08112011	12	0.002	0.155	0.084	0.000	0.000	0.001	0.002	0.006	0.035	0.000	0.031	305.528	0.544	0.1453161E-03	1.529040	0.4218699E-02	-0.4407597
08112011	13	0.001	0.127	0.072	0.000	0.000	0.000	0.001	0.005	0.031	0.000	0.030	306.598	0.505	0.2604723E-04	1.288383	0.1791444E-02	-0.1431582
08112011	14	0.001	0.092	0.053	0.000	0.000	0.000	0.001	0.004	0.027	0.000	0.029	306.778	0.493	0.1156330E-04	1.232222	0.9869853E-03	0.9637828E-01
08112011	15	0.000	0.059	0.043	0.000	0.000	0.000	0.001	0.003	0.025	0.000	0.030	306.114	0.510	0.1311302E-05	1.574145	0.1616092E-02	-0.1142128E-01
08112011	16	0.000	0.044	0.039	0.000	0.000	0.000	0.001	0.003	0.024	0.000	0.028	305.348	0.533	0.3099442E-05	1.493186	0.1088430E-02	0.1373134
08112011	17	0.001	0.040	0.037	0.000	0.000	0.001	0.001	0.004	0.025	0.000	0.026	304.293	0.568	0.6067753E-04	1.501032	0.1863824E-02	-0.9401508E-01
08112011	18	0.005	0.044	0.043	0.000	0.000	0.001	0.002	0.008	0.032	0.000	0.027	303.083	0.617	0.8335471E-02	2.299362	0.4941647E-02	-0.3322645
08112011	19	0.022	0.049	0.041	0.000	0.001	0.001	0.003	0.012	0.026	0.001	0.028	301.906	0.666	NaN	2.793087	0.1514525E-01	-0.7341920
08112011	20	0.038	0.058	0.025	0.000	0.001	0.001	0.004	0.018	0.014	0.001	0.028	301.051	0.698	NaN	2.640460	0.9885491E-04	1.426681
08112011	21	0.034	0.062	0.019	0.000	0.001	0.001	0.004	0.017	0.013	0.000	0.027	300.147	0.727	NaN	2.553028	0.8531548E-04	1.476028
08112011	22	0.033	0.058	0.018	0.000	0.001	0.001	0.003	0.015	0.015	0.000	0.025	299.399	0.749	NaN	2.731658	0.8604961E-04	1.501677
08112011	23	0.030	0.048	0.017	0.000	0.001	0.001	0.003	0.013	0.019	0.001	0.025	298.834	0.773	NaN	3.294807	0.1259565E-03	1.417609
08112011	24	0.027	0.040	0.016	0.000	0.001	0.001	0.003	0.012	0.023	0.001	0.025	298.403	0.787	NaN	3.707352	0.1440493E-03	1.410553
08122011	01	0.020	0.034	0.015	0.000	0.001	0.001	0.003	0.010	0.030	0.001	0.027	297.867	0.818	NaN	4.937598	0.3891598E-03	1.103388
08122011	02	0.015	0.032	0.015	0.000	0.001	0.000	0.003	0.010	0.039	0.001	0.031	297.661	0.813	NaN	5.133058	0.1274054E-02	0.6051885
08122011	03	0.012	0.035	0.016	0.000	0.001	0.000	0.003	0.010	0.050	0.001	0.037	297.270	0.832	NaN	6.623084	0.3027362E-02	0.3399959
08122011	04	0.016	0.041	0.017	0.000	0.001	0.001	0.003	0.011	0.057	0.001	0.042	297.024	0.835	NaN	8.380384	0.1654126E-02	0.7046954
08122011	05	0.031	0.050	0.019	0.000	0.001	0.001	0.004	0.014	0.058	0.002	0.046	296.731	0.845	NaN	10.03075	0.4268668E-03	1.371041
08122011	06	0.059	0.062	0.019	0.001	0.001	0.002	0.005	0.019	0.052	0.003	0.049	296.473	0.853	0.1320704	7.121255	0.7556606E-04	1.974230
08122011	07	0.091	0.074	0.021	0.001	0.001	0.004	0.007	0.026	0.038	0.005	0.050	297.018	0.852	0.1711777	6.062535	0.2663969E-04	2.357125
08122011	08	0.081	0.068	0.039	0.001	0.002	0.004	0.007	0.027	0.035	0.006	0.049	298.898	0.765	0.7703555E-01	3.760075	0.2709914E-04	2.142241
08122011	09	0.018	0.057	0.054	0.000	0.001	0.002	0.004	0.014	0.056	0.001	0.045	300.813	0.702	NaN	4.877153	0.2578391E-01	-0.7231824
08122011	10	0.003	0.084	0.071	0.000	0.001	0.001	0.003	0.009	0.055	0.000	0.044	302.716	0.639	0.1708865E-02	3.216199	0.5974520E-02	-0.2689601
08122011	11	0.001	0.093	0.088	0.000	0.001	0.001	0.002	0.007	0.049	0.000	0.044	304.318	0.578	0.1492500E-03	2.499293	0.4359610E-02	-0.2416305
08122011	12	0.001	0.085	0.080	0.000	0.000	0.001	0.002	0.006	0.041	0.000	0.043	305.695	0.524	0.4345179E-04	2.083067	0.1780663E-02	0.6812144E-01
08122011	13	0.001	0.068	0.064	0.000	0.000	0.000	0.001	0.005	0.033	0.000	0.038	305.791	0.484	0.6020069E-05	1.598637	0.8015171E-03	0.2998371
08122011	14	0.000	0.056	0.055	0.000	0.000	0.000	0.001	0.005	0.028	0.000	0.033	307.259	0.455	0.2563000E-05	1.259032	0.6352785E-03	0.2970728
08122011	15	0.000	0.040	0.050	0.000	0.000	0.000	0.001	0.004	0.024	0.000	0.029	306.457	0.450	0.7748604E-06	1.104421	0.6295072E-03	0.2441341
08122011	16	0.000	0.030	0.052	0.000	0.000	0.000	0.001	0.004	0.023	0.000	0.030	306.642	0.459	0.2384186E-06	1.342380	0.2258376E-02	-0.2259205
08122011	17	0.000	0.025	0.046	0.000	0.000	0.000	0.001	0.004	0.022	0.000	0.029	306.349	0.465	0.3576279E-06	1.342954	0.2276271E-02	-0.2291627
08122011	18	0.002	0.025	0.041	0.000	0.000	0.001	0.001	0.006	0.026	0.000	0.028	305.408	0.479	0.3284216E-04	1.068912	0.1890856E-02	-0.2477165
08122011	19	0.021	0.028	0.052	0.000	0.001	0.001	0.003	0.012	0.024	0.000	0.027	303.769	0.515	NaN	1.539953	0.2803045E-01	-1.260123
08122011	20	0.031	0.028	0.043	0.000	0.001	0.001	0.003	0.013	0.019	0.000	0.025	300.466	0.666	NaN	2.854637	0.7356760E-02	-0.4111356
08122011	21	0.021	0.023	0.033	0.000	0.001	0.001	0.002	0.006	0.030	0.000	0.022	299.433	0.670	NaN	2.894505	0.5831360E-02	-0.3041956
08122011	22	0.025	0.021	0.031	0.000	0.001	0.001	0.002	0.004	0.030	0.001	0.021	298.691	0.686	NaN	3.331439	0.3747875E-02	-0.5115326E-01
08122011	23	0.030	0.020	0.029	0.000	0.001	0.001	0.002	0.004	0.028	0.001	0.020	298.171	0.704	NaN	3.509523	0.7997981E-03	0.6422677
08122011	24	0.042	0.022	0.026	0.001	0.001	0.001	0.002	0.005	0.025	0.001	0.019	297.717	0.725	0.1799995E-01	1.885206	0.6240801E-04	1.480119
08132011	01	0.049	0.021	0.021	0.001	0.001	0.001	0.002	0.005	0.021	0.001	0.018	297.091	0.768	0.2635491E-01	2.043350	0.4496836E-04	1.657436
08132011	02	0.050	0.020	0.016	0.001	0.001	0.001	0.003	0.005	0.019	0.001	0.017	296.682	0.796	0.3482878E-01	2.138042	0.3281026E-04	1.814007
08132011	03	0.049	0.021	0.013	0.001	0.001	0.001	0.003	0.005	0.018	0.001	0.016	296.377	0.803	0.3488088E-01	1.957617	0.2784872E-04	1.846922
08132011	04	0.049	0.024	0.011	0.002	0.001	0.001	0.003	0.004	0.018	0.001	0.015	296.083	0.826	0.4532981E-01	2.270145	0.2613829E-04	1.938776
08132011	05	0.053	0.028	0.012	0.002	0.001	0.001	0.003	0.004	0.019	0.001	0.015	295.897	0.837	0.5606031E-01	2.426778	0.2312948E-04	2.020864
08132011	06	0.058	0.033	0.013	0.001	0.001	0.001	0.003	0.004	0.020	0.002	0.016	295.697	0.855	0.7905489E-01	3.046862	0.2379736E-04	2.107324
08132011	07	0.057	0.035	0.014	0.001	0.001	0.001	0.003	0.003	0.022	0.002	0.017	296.027	0.850	0.7186729E-01	3.295893	0.3283832E-04	2.001592
08132011	08	0.028	0.022	0.021	0.001	0.001	0.001	0.002	0.002	0.029	0.001	0.018	297.083	0.832	0.2785259E-01	3.259607	0.9012218E-04	1.558334
08132011	09	0.006	0.013	0.023	0.001	0.001	0.001	0.001	0.001	0.034	0.001	0.020	298.633	0.789	0.1739854E-01	3.168272	0.1614378E-03	1.292817
08132011	10	0.002	0.011	0.029	0.000	0.000	0.000	0.001	0.001	0.028	0.000	0.020	300.108	0.739	0.7221103E-03	2.341907	0.3949121E-02	-0.2269308
08132011	11	0.001	0.016	0.044	0.000	0.000	0.000	0.000	0.001	0.024	0.000	0.020	301.601	0.692	0.1277328E-03	1.927667	0.2725290E-02	-0.1503808
08132011	12	0.001	0.026	0.071	0.000	0.000	0.000	0.000	0.001	0.025	0.000	0.023	303.084	0.648	0.6085634E-04	1.965041	0.2045782E-02	-0.1748773E-01
08132011	13	0.001	0.039	0.101	0.000	0.000	0.000	0.000	0.001	0.027	0.000	0.027	304.412	0.612	0.2497435E-04	2.041028	0.1674044E-02	0.8608215E-01
08132011	14	0.001	0.052	0.119	0.000	0.000	0.000	0.000	0.001	0.029	0.000	0.030	305.241	0.578	0.1239777E-04	2.056728	0.1551812E-02	0.1223379
08132011	15	0.001	0.060	0.123	0.000	0.000	0.000	0.000	0.001	0.033	0.000	0.032	305.289	0.566	0.2163649E-04	2.095578	0.1527398E-02	0.1373518
08132011	16	0.001	0.040	0.108	0.000	0.000	0.001	0.000	0.001	0.037	0.000	0.035	304.502	0.583	0.5251169E-04	2.434491	0.1943513E-02	0.9782072E-01
08132011	17	0.001	0.020	0.070	0.000	0.000	0.001	0.000	0.001	0.035	0.000	0.030	303.989	0.573	0.6842613E-04	1.968125	0.2329781E-02	-0.7326250E-01
08132011	18	0.002	0.017	0.049	0.000	0.000	0.000	0.000	0.001	0.030	0.000	0.023	303.075	0.565	0.5018711E-04	1.337533	0.3358898E-02	-0.3998922
08132011	19	0.011	0.027	0.048	0.000	0.000	0.001	0.001	0.001	0.036	0.000	0.021	301.655	0.632	NaN	2.322380	0.3491408E-01	-1.177067
08132011	20	0.016	0.031	0.037	0.000	0.001	0.001	0.001	0.001	0.036	0.000	0.020	300.172	0.679	NaN	3.053284	0.1447684E-01	-0.6759067
08132011	21	0.007	0.027	0.024	0.000	0.000	0.001	0.001	0.001	0.036	0.000	0.020	299.535	0.688	NaN	2.607463	0.1224398E-01	-0.6717045
08132011	22	0.002	0.024	0.017	0.000	0.000	0.000	0.000	0.001	0.031	0.000	0.020	298.850	0.723	0.1171827E-02	2.227348	0.4069820E-02	-0.2617871
08132011	23	0.001	0.017	0.014	0.000	0.000	0.000	0.000	0.001	0.027	0.000	0.021	298.586	0.729	0.2968907E-03	2.349007	0.3889029E-02	-0.2189569
08132011	24	0.001	0.014	0.013	0.000	0.000	0.000	0.000	0.001	0.025	0.000	0.019	298.211	0.757	0.4354119E-03	2.387507	0.3710724E-02	-0.1915140
08142011	01	0.002	0.016	0.013	0.000	0.000	0.000	0.000	0.001	0.026	0.000	0.018	297.799	0.794	0.1357079E-02	2.632361	0.3639498E-02	-0.1406960
08142011	02	0.003	0.019	0.015	0.000	0.000	0.000	0.000	0.001	0.028	0.000	0.017	297.496	0.814	0.1090330E-01	2.852434	0.3189475E-02	-0.4850359E-01
08142011	03	0.004	0.024	0.016	0.000	0.000	0.000	0.001	0.001	0.028	0.000	0.016	297.172	0.834	NaN	3.306903	0.9201499E-02	-0.4444371
08142011	04	0.010	0.028	0.017	0.000	0.000	0.000	0.001	0.001	0.026	0.000	0.015	296.777	0.858	NaN	4.663877	0.4710778E-02	-0.4345512E-02
08142011	05	0.018	0.031	0.017	0.000	0.001	0.000	0.001	0.001	0.023	0.000	0.014	296.511	0.858	NaN	5.415051	0.9910323E-03	0.7375147
08142011	06	0.028	0.037	0.017	0.001	0.001	0.001	0.001	0.001	0.021	0.001	0.013	296.099	0.879	0.4042464E-01	3.423123	0.5930953E-04	1.761298
08142011	07	0.034	0.040	0.017	0.001	0.001	0.001	0.001	0.002	0.020	0.001	0.013	296.425	0.865	0.3949022E-01	2.932995	0.4438237E-04	1.820101
08142011	08	0.030	0.040	0.022	0.001	0.002	0.001	0.002	0.002	0.019	0.001	0.014	297.673	0.816	0.1969337E-01	2.347706	0.6028145E-04	1.590460
08142011	09	0.020	0.049	0.030	0.001	0.002	0.001	0.001	0.002	0.021	0.001	0.015	299.086	0.760	0.9041667E-02	1.958590	0.1057826E-03	1.267529
08142011	10	0.016	0.053	0.051	0.001	0.002	0.001	0.001	0.002	0.024	0.001	0.017	300.483	0.693	0.6220937E-02	1.777757	0.1309703E-03	1.132699
08142011	11	0.009	0.064	0.077	0.001	0.001	0.001	0.001	0.002	0.030	0.001	0.019	301.645	0.632	0.4655004E-02	1.656875	0.1526994E-03	1.035452
08142011	12	0.004	0.082	0.089	0.000	0.001	0.001	0.001	0.003	0.033	0.000	0.023	302.580	0.592	0.4981756E-02	1.893757	0.4522185E-02	-0.3780240
08142011	13	0.002	0.106	0.071	0.000	0.001	0.001	0.002	0.005	0.028	0.000	0.026	305.674	0.487	0.9584427E-04	1.120554	0.3745487E-02	-0.5240757
08142011	14	0.000	0.085	0.033	0.000	0.000	0.000	0.001	0.003	0.021	0.000	0.026	306.551	0.447	0.2384186E-06	1.090455	0.1272519E-02	-0.6705637E-01
08142011	15	0.000	0.058	0.023	0.000	0.000	0.000	0.001	0.002	0.019	0.000	0.027	306.151	0.443	0.1788139E-06	1.428527	0.5180920E-02	-0.5595185
08142011	16	0.000	0.046	0.019	0.000	0.000	0.000	0.001	0.002	0.019	0.000	0.029	305.505	0.452	0.1788139E-06	1.709334	0.7236598E-02	-0.6267076
08142011	17	0.000	0.040	0.016	0.000	0.000	0.000	0.001	0.002	0.022	0.000	0.028	304.489	0.472	0.4768372E-06	1.465204	0.3248233E-02	-0.3457491
08142011	18	0.001	0.040	0.015	0.000	0.000	0.000	0.001	0.003	0.028	0.000	0.026	303.280	0.498	0.2211332E-04	1.144526	0.1447076E-02	-0.1018655
08142011	19	0.012	0.039	0.015	0.001	0.001	0.001	0.002	0.006	0.032	0.000	0.024	301.926	0.541	0.8815467E-02	1.333184	0.5932422E-04	1.351658
08142011	20	0.035	0.038	0.012	0.001	0.001	0.001	0.002	0.009	0.021	0.000	0.022	300.605	0.578	0.8383989E-02	1.091214	0.4276328E-04	1.406839
08142011	21	0.035	0.034	0.008	0.001	0.001	0.001	0.002	0.007	0.014	0.000	0.017	299.669	0.598	0.8621454E-02	0.8989897	0.2785841E-04	1.508798
08142011	22	0.019	0.041	0.006	0.001	0.001	0.001	0.001	0.005	0.012	0.000	0.013	298.980	0.610	0.9207785E-02	0.7698612	0.2431364E-04	1.500562
08142011	23	0.013	0.030	0.006	0.001	0.001	0.001	0.001	0.005	0.013	0.000	0.013	298.367	0.624	0.9398818E-02	0.7917871	0.2454394E-04	1.508664
08142011	24	0.010	0.028	0.007	0.001	0.001	0.000	0.002	0.006	0.018	0.000	0.016	297.663	0.644	0.1121598E-01	0.9455445	0.4059965E-04	1.367160
08152011	01	0.005	0.033	0.010	0.001	0.001	0.000	0.002	0.006	0.032	0.000	0.023	296.908	0.669	0.1847321E-01	1.784240	0.9855827E-04	1.257760
08152011	02	0.004	0.039	0.012	0.001	0.001	0.000	0.002	0.007	0.044	0.000	0.032	296.139	0.695	0.2335906E-03	3.139745	0.3483948E-02	-0.4517734E-01
08152011	03	0.002	0.044	0.015	0.001	0.001	0.000	0.002	0.008	0.055	0.000	0.041	295.494	0.714	0.000000	3.797632	0.5169780E-02	-0.1339592
08152011	04	0.002	0.049	0.017	0.001	0.001	0.000	0.002	0.009	0.069	0.000	0.051	295.012	0.724	0.000000	4.945786	0.6870233E-02	-0.1427361
08152011	05	0.003	0.054	0.019	0.001	0.001	0.001	0.003	0.011	0.090	0.001	0.064	294.520	0.735	0.000000	6.956953	0.6164816E-02	0.5249895E-01
08152011	06	0.005	0.061	0.020	0.001	0.001	0.002	0.004	0.014	0.117	0.001	0.076	294.017	0.749	0.1573622E-02	10.66867	0.5310146E-02	0.3030038
08152011	07	0.005	0.066	0.026	0.001	0.001	0.002	0.004	0.015	0.131	0.001	0.086	293.730	0.772	0.1388371E-02	11.67465	0.5283385E-02	0.3443317
08152011	08	0.001	0.071	0.041	0.001	0.001	0.002	0.003	0.012	0.118	0.001	0.093	294.898	0.740	0.000000	9.987412	0.1496762E-01	-0.1756999
08152011	09	0.000	0.086	0.054	0.000	0.001	0.001	0.002	0.007	0.079	0.001	0.095	296.609	0.687	0.1881719E-03	10.01373	0.1232707E-01	-0.9026404E-01
08152011	10	0.000	0.082	0.062	0.000	0.001	0.001	0.002	0.006	0.060	0.001	0.094	298.405	0.630	0.3600121E-04	9.635521	0.2657572E-01	-0.4406098
08152011	11	0.000	0.072	0.073	0.000	0.001	0.001	0.002	0.005	0.056	0.001	0.094	300.175	0.580	0.1317263E-04	8.768999	0.3046633E-01	-0.5408702
08152011	12	0.000	0.075	0.080	0.000	0.001	0.001	0.002	0.005	0.056	0.000	0.095	301.672	0.538	0.6139278E-05	7.989768	0.3083422E-01	-0.5864989
08152011	13	0.000	0.060	0.063	0.000	0.000	0.000	0.002	0.005	0.049	0.000	0.081	302.217	0.504	0.2264977E-05	5.959796	0.2616592E-01	-0.6425045
08152011	14	0.000	0.044	0.049	0.000	0.000	0.000	0.001	0.004	0.045	0.000	0.070	303.597	0.480	0.1132488E-05	4.769443	0.2081137E-01	-0.6398330
08152011	15	0.000	0.037	0.048	0.000	0.000	0.001	0.001	0.004	0.049	0.000	0.066	302.133	0.486	0.1788139E-05	4.083593	0.1070081E-01	-0.4183744
08152011	16	0.001	0.033	0.053	0.000	0.001	0.001	0.002	0.007	0.061	0.000	0.064	301.360	0.499	0.4255772E-04	3.018670	0.1639696E-02	0.2650524
08152011	17	0.001	0.032	0.052	0.000	0.001	0.001	0.002	0.008	0.062	0.000	0.058	301.762	0.504	0.6717443E-04	2.569709	0.3168830E-02	-0.9101503E-01
08152011	18	0.001	0.031	0.036	0.000	0.000	0.001	0.002	0.005	0.055	0.000	0.056	300.893	0.517	0.4869699E-04	2.885360	0.1663024E-02	0.2393015
08152011	19	0.001	0.030	0.030	0.000	0.001	0.001	0.002	0.009	0.062	0.000	0.056	299.888	0.530	0.9727478E-04	2.652551	0.6760658E-02	-0.4063253
08152011	20	0.014	0.035	0.028	0.000	0.001	0.002	0.005	0.020	0.078	0.001	0.062	298.733	0.557	0.3722024E-01	5.992083	0.7111913E-02	-0.7440864E-01
08152011	21	0.029	0.036	0.026	0.000	0.001	0.002	0.006	0.025	0.079	0.001	0.069	297.773	0.588	NaN	4.517338	0.1174768E-02	0.5849305
08152011	22	0.012	0.036	0.023	0.000	0.001	0.002	0.006	0.025	0.106	0.001	0.077	297.084	0.613	0.6203765E-01	9.030920	0.7964406E-02	0.5457862E-01
08152011	23	0.006	0.036	0.019	0.001	0.001	0.002	0.005	0.021	0.115	0.001	0.083	296.544	0.635	0.8937120E-03	7.387088	0.5983079E-02	0.9154850E-01
08152011	24	0.003	0.038	0.016	0.001	0.001	0.001	0.005	0.017	0.112	0.001	0.086	296.024	0.658	0.000000	6.611702	0.1013274E-01	-0.1854138
08162011	01	0.002	0.040	0.014	0.001	0.001	0.001	0.005	0.016	0.108	0.001	0.085	295.510	0.686	0.000000	7.194554	0.1149878E-01	-0.2036479
08162011	02	0.002	0.042	0.012	0.001	0.001	0.001	0.004	0.015	0.105	0.001	0.082	295.072	0.706	0.000000	7.528988	0.1119746E-01	-0.1723830
08162011	03	0.002	0.044	0.010	0.001	0.001	0.001	0.004	0.015	0.105	0.001	0.079	294.671	0.723	0.000000	7.611898	0.8939330E-02	-0.6981207E-01
08162011	04	0.004	0.045	0.010	0.001	0.001	0.001	0.005	0.016	0.107	0.001	0.077	294.324	0.737	0.000000	8.119212	0.5432100E-02	0.1745462
08162011	05	0.006	0.045	0.011	0.001	0.001	0.001	0.005	0.018	0.112	0.001	0.075	293.916	0.757	0.3105640E-02	11.73799	0.5492220E-02	0.3298460
08162011	06	0.022	0.045	0.012	0.001	0.001	0.002	0.005	0.019	0.104	0.002	0.073	293.578	0.776	0.1212810	8.631817	0.3186222E-03	1.432826
08162011	07	0.042	0.049	0.013	0.001	0.001	0.003	0.006	0.024	0.088	0.003	0.072	293.608	0.796	0.1921619	8.599476	0.1487315E-03	1.762069
08162011	08	0.027	0.049	0.029	0.000	0.001	0.003	0.006	0.023	0.084	0.004	0.067	295.032	0.757	NaN	8.849693	0.1051237E-02	0.9252274
08162011	09	0.003	0.053	0.053	0.000	0.001	0.002	0.004	0.015	0.072	0.001	0.057	297.238	0.668	0.1967078E-01	4.527954	0.5084069E-02	-0.5030946E-01
08162011	10	0.001	0.065	0.071	0.000	0.001	0.001	0.003	0.010	0.053	0.000	0.050	299.362	0.578	0.1764297E-03	2.676809	0.6875955E-02	-0.4097157
08162011	11	0.001	0.072	0.087	0.000	0.001	0.001	0.002	0.008	0.048	0.000	0.049	301.003	0.517	0.6514788E-04	2.299543	0.2420249E-02	-0.2221847E-01
08162011	12	0.000	0.066	0.098	0.000	0.000	0.001	0.002	0.007	0.045	0.000	0.049	302.409	0.472	0.2294779E-04	1.985509	0.1061741E-02	0.2718533
08162011	13	0.001	0.061	0.112	0.000	0.000	0.001	0.002	0.007	0.047	0.000	0.050	303.757	0.431	0.1800060E-04	1.727622	0.1060124E-02	0.2120919
08162011	14	0.001	0.053	0.114	0.000	0.000	0.001	0.002	0.007	0.046	0.000	0.048	304.651	0.403	0.1406670E-04	1.452653	0.1046729E-02	0.1423278
08162011	15	0.001	0.043	0.106	0.000	0.000	0.001	0.002	0.006	0.044	0.000	0.045	304.605	0.399	0.1418591E-04	1.381173	0.1068664E-02	0.1114071
08162011	16	0.001	0.038	0.107	0.000	0.000	0.001	0.002	0.006	0.045	0.000	0.043	304.002	0.404	0.1847744E-04	1.292883	0.1539828E-02	-0.7591284E-01
08162011	17	0.001	0.035	0.110	0.000	0.000	0.001	0.002	0.007	0.048	0.000	0.042	303.485	0.410	0.2712011E-04	1.241303	0.3504668E-02	-0.4507690
08162011	18	0.002	0.035	0.106	0.000	0.000	0.001	0.002	0.008	0.052	0.000	0.042	302.724	0.418	0.1014471E-03	1.432470	0.7320095E-02	-0.7084311
08162011	19	0.015	0.042	0.103	0.000	0.001	0.001	0.003	0.014	0.054	0.000	0.044	301.600	0.426	0.9019732E-02	3.146246	0.7313441E-02	-0.3663290
08162011	20	0.066	0.063	0.111	0.000	0.001	0.002	0.006	0.026	0.028	0.001	0.046	300.171	0.452	NaN	2.186593	0.4350736E-01	-1.298795
08162011	21	0.093	0.077	0.124	0.000	0.001	0.003	0.007	0.033	0.016	0.001	0.047	298.939	0.484	NaN	2.748648	0.2578752E-01	-0.9722906
08162011	22	0.103	0.081	0.135	0.000	0.001	0.003	0.008	0.035	0.012	0.002	0.047	297.908	0.521	NaN	3.399505	0.2669257E-01	-0.8949747
08162011	23	0.106	0.076	0.131	0.000	0.001	0.003	0.008	0.035	0.010	0.003	0.046	297.021	0.564	NaN	4.069477	0.2067210E-01	-0.7058460
08162011	24	0.104	0.064	0.108	0.000	0.001	0.003	0.008	0.034	0.009	0.004	0.044	296.242	0.611	NaN	4.919801	0.2575675E-02	0.2810565
08172011	01	0.096	0.051	0.076	0.000	0.001	0.003	0.008	0.033	0.012	0.004	0.043	295.512	0.662	NaN	4.826987	0.3525187E-04	2.136494
08172011	02	0.081	0.042	0.048	0.000	0.001	0.002	0.008	0.030	0.015	0.004	0.042	295.010	0.703	NaN	4.361112	0.2773905E-04	2.196506
08172011	03	0.068	0.038	0.034	0.000	0.001	0.002	0.008	0.028	0.019	0.003	0.042	294.694	0.728	NaN	4.277824	0.3038991E-04	2.148494
08172011	04	0.061	0.039	0.027	0.000	0.002	0.002	0.008	0.028	0.021	0.003	0.043	294.443	0.751	NaN	4.336499	0.3179405E-04	2.134794
08172011	05	0.069	0.044	0.022	0.000	0.002	0.003	0.008	0.029	0.019	0.003	0.044	294.236	0.773	NaN	4.415042	0.2127212E-04	2.317124
08172011	06	0.089	0.054	0.017	0.001	0.002	0.004	0.010	0.033	0.014	0.004	0.046	294.163	0.787	0.2106878	2.676684	0.3640243E-05	2.866467
08172011	07	0.093	0.056	0.013	0.001	0.002	0.005	0.011	0.039	0.007	0.006	0.050	294.639	0.796	0.2805387	2.565500	0.1424980E-05	3.255363
08172011	08	0.058	0.047	0.025	0.001	0.003	0.005	0.011	0.038	0.015	0.005	0.054	296.150	0.763	0.1048201	2.763392	0.7408792E-05	2.571695
08172011	09	0.020	0.053	0.051	0.000	0.002	0.003	0.009	0.027	0.053	0.002	0.058	298.263	0.696	0.4180360E-01	10.24858	0.8174122E-02	0.9822259E-01
08172011	10	0.003	0.119	0.078	0.000	0.002	0.002	0.006	0.016	0.071	0.001	0.063	300.430	0.623	0.2391279E-02	4.069527	0.6691845E-02	-0.2160019
08172011	11	0.001	0.211	0.105	0.000	0.001	0.001	0.004	0.011	0.070	0.000	0.071	302.617	0.547	0.1133084E-03	3.694554	0.3213013E-02	0.6064948E-01
08172011	12	0.001	0.180	0.103	0.000	0.001	0.001	0.003	0.009	0.069	0.000	0.073	304.029	0.496	0.4673004E-04	3.360021	0.1873585E-02	0.2536686
08172011	13	0.001	0.141	0.090	0.000	0.001	0.001	0.003	0.007	0.067	0.000	0.070	305.493	0.451	0.2497435E-04	2.747707	0.1389187E-02	0.2962096
08172011	14	0.000	0.102	0.078	0.000	0.001	0.001	0.003	0.006	0.062	0.000	0.069	306.217	0.430	0.9715557E-05	2.582067	0.8887330E-03	0.4631962
08172011	15	0.000	0.073	0.075	0.000	0.001	0.001	0.002	0.006	0.059	0.000	0.082	306.037	0.430	0.4768372E-06	4.110532	0.1240550E-01	-0.4797161
08172011	16	0.000	0.057	0.073	0.000	0.001	0.001	0.002	0.006	0.056	0.000	0.093	305.462	0.436	0.7152557E-06	5.734836	0.2671713E-01	-0.6682689
08172011	17	0.000	0.048	0.069	0.000	0.001	0.001	0.002	0.006	0.055	0.000	0.101	304.499	0.445	0.1192093E-05	6.913789	0.3606338E-01	-0.7173503
08172011	18	0.000	0.048	0.061	0.000	0.001	0.001	0.003	0.008	0.060	0.000	0.106	303.457	0.460	0.1490116E-05	7.019065	0.3306857E-01	-0.6731362
08172011	19	0.000	0.052	0.051	0.000	0.001	0.001	0.004	0.015	0.086	0.000	0.113	302.146	0.489	0.4053116E-05	5.574042	0.6283217E-02	-0.5201178E-01
08172011	20	0.001	0.056	0.045	0.000	0.001	0.002	0.006	0.025	0.120	0.000	0.115	300.658	0.506	0.1685619E-03	4.663786	0.1000300E-01	-0.3313917
08172011	21	0.003	0.067	0.054	0.000	0.001	0.002	0.007	0.027	0.137	0.001	0.114	299.480	0.542	0.1249969E-02	5.549677	0.1437379E-01	-0.4133037
08172011	22	0.005	0.070	0.059	0.000	0.001	0.002	0.007	0.026	0.143	0.000	0.110	298.652	0.569	0.7358313E-02	6.338562	0.9192621E-02	-0.1614486
08172011	23	0.007	0.065	0.059	0.000	0.001	0.002	0.007	0.025	0.140	0.000	0.104	297.935	0.595	0.2973336E-01	6.944631	0.7551427E-02	-0.3637988E-01
08172011	24	0.007	0.058	0.053	0.000	0.001	0.002	0.007	0.023	0.134	0.000	0.099	297.330	0.620	0.3245825E-01	7.103174	0.7205836E-02	-0.6231954E-02
08182011	01	0.005	0.049	0.042	0.000	0.002	0.002	0.007	0.022	0.126	0.000	0.094	296.808	0.644	0.3657615E-01	6.982584	0.6653153E-02	0.2098867E-01
08182011	02	0.004	0.041	0.031	0.000	0.002	0.002	0.007	0.020	0.115	0.001	0.089	296.320	0.679	0.1546174E-01	7.415047	0.7198446E-02	0.1287515E-01
08182011	03	0.003	0.037	0.025	0.000	0.002	0.002	0.007	0.020	0.105	0.001	0.083	296.090	0.695	0.1810092E-01	7.264837	0.6543658E-02	0.4540525E-01
08182011	04	0.005	0.038	0.022	0.000	0.002	0.002	0.007	0.020	0.100	0.001	0.078	295.832	0.719	0.5394578E-01	7.807208	0.5802807E-02	0.1288576
08182011	05	0.018	0.044	0.021	0.001	0.003	0.002	0.008	0.022	0.095	0.001	0.074	295.615	0.744	0.2074361E-02	13.49475	0.6624722E-02	0.3089972
08182011	06	0.056	0.054	0.017	0.001	0.003	0.003	0.009	0.027	0.074	0.003	0.071	295.397	0.770	0.1417528	6.949852	0.1105915E-03	1.798254
08182011	07	0.091	0.067	0.016	0.001	0.003	0.005	0.011	0.034	0.052	0.005	0.069	295.833	0.789	0.2020756	6.301135	0.3784158E-04	2.221449
08182011	08	0.080	0.063	0.030	0.001	0.004	0.005	0.012	0.038	0.039	0.007	0.066	297.732	0.749	0.9955114E-01	4.376327	0.2798430E-04	2.194195
08182011	09	0.016	0.046	0.060	0.000	0.002	0.003	0.007	0.020	0.060	0.003	0.052	299.842	0.677	NaN	4.991532	0.2733472E-01	-0.7384808
08182011	10	0.004	0.115	0.074	0.000	0.001	0.001	0.003	0.010	0.047	0.001	0.040	301.841	0.606	0.2430081E-02	2.575666	0.5172855E-02	-0.3028408
08182011	11	0.001	0.123	0.097	0.000	0.001	0.001	0.002	0.007	0.041	0.000	0.042	303.605	0.541	0.7110834E-04	2.111507	0.2458866E-02	-0.6614225E-01
08182011	12	0.000	0.115	0.121	0.000	0.001	0.001	0.002	0.006	0.039	0.000	0.049	304.992	0.493	0.8702278E-05	2.307152	0.1010303E-02	0.3586248
08182011	13	0.000	0.081	0.116	0.000	0.001	0.001	0.002	0.006	0.039	0.000	0.052	305.975	0.447	0.8344650E-06	2.324184	0.2478509E-02	-0.2791991E-01
08182011	14	0.000	0.059	0.104	0.000	0.001	0.001	0.002	0.005	0.039	0.000	0.055	305.779	0.434	0.3576279E-06	2.618786	0.6283789E-02	-0.3801216
08182011	15	0.000	0.047	0.102	0.000	0.001	0.001	0.002	0.006	0.038	0.000	0.057	305.657	0.445	0.5960464E-06	2.986980	0.8358432E-02	-0.4468924
08182011	16	0.000	0.034	0.094	0.000	0.001	0.001	0.002	0.005	0.036	0.000	0.058	305.663	0.450	0.5364418E-06	3.370288	0.1240690E-01	-0.5659963
08182011	17	0.000	0.025	0.081	0.000	0.000	0.001	0.002	0.005	0.032	0.000	0.058	305.344	0.459	0.7748604E-06	3.835693	0.1753679E-01	-0.6601064
08182011	18	0.000	0.023	0.069	0.000	0.000	0.001	0.002	0.006	0.034	0.000	0.056	304.464	0.477	0.1072884E-05	3.524807	0.1251648E-01	-0.5503467
08182011	19	0.002	0.031	0.072	0.000	0.001	0.001	0.003	0.011	0.053	0.000	0.054	303.010	0.512	0.7671118E-04	2.266012	0.3366925E-02	-0.1719713
08182011	20	0.006	0.043	0.065	0.000	0.001	0.002	0.004	0.014	0.065	0.001	0.050	300.273	0.629	0.1695716E-01	4.942791	0.6577886E-02	-0.1241140
08182011	21	0.003	0.042	0.063	0.000	0.001	0.001	0.002	0.006	0.062	0.000	0.047	298.998	0.632	0.1017809E-02	3.506918	0.7707254E-02	-0.3419741
08182011	22	0.002	0.044	0.072	0.000	0.001	0.001	0.001	0.004	0.062	0.000	0.047	298.666	0.621	0.4366636E-03	3.403580	0.1011221E-01	-0.4729102
08182011	23	0.002	0.051	0.087	0.000	0.001	0.001	0.002	0.005	0.068	0.000	0.048	297.883	0.661	0.1754403E-02	4.119861	0.7354014E-02	-0.2516419
08182011	24	0.002	0.050	0.089	0.000	0.001	0.001	0.002	0.006	0.067	0.000	0.051	297.089	0.714	0.1671433E-02	5.017943	0.7854081E-02	-0.1945696
08192011	01	0.001	0.049	0.076	0.000	0.001	0.001	0.003	0.007	0.065	0.000	0.057	296.320	0.770	0.1638532E-02	7.061458	0.8199799E-02	-0.6490882E-01
08192011	02	0.001	0.045	0.059	0.000	0.001	0.001	0.003	0.008	0.066	0.001	0.063	295.709	0.815	0.2580106E-02	10.10182	0.9132049E-02	0.4383158E-01
08192011	03	0.001	0.047	0.046	0.000	0.001	0.001	0.003	0.007	0.064	0.001	0.066	295.399	0.829	0.2352118E-02	11.69702	0.1040615E-01	0.5078513E-01
08192011	04	0.001	0.050	0.038	0.000	0.001	0.001	0.003	0.006	0.066	0.001	0.068	295.163	0.841	0.2714038E-02	13.07473	0.1151523E-01	0.5516040E-01
08192011	05	0.001	0.044	0.033	0.000	0.001	0.001	0.003	0.007	0.081	0.001	0.075	295.064	0.848	0.4708290E-02	14.94524	0.1203443E-01	0.9407715E-01
08192011	06	0.002	0.048	0.030	0.001	0.001	0.002	0.003	0.007	0.106	0.001	0.082	294.981	0.854	0.000000	15.94808	0.1113303E-01	0.1560951
08192011	07	0.003	0.055	0.030	0.001	0.002	0.003	0.004	0.008	0.131	0.001	0.089	295.411	0.862	0.000000	18.95064	0.8445683E-02	0.3509891
08192011	08	0.004	0.058	0.046	0.002	0.002	0.004	0.004	0.008	0.145	0.003	0.089	297.429	0.821	0.5969405E-03	15.83695	0.6753077E-02	0.3701698
08192011	09	0.005	0.050	0.072	0.001	0.002	0.003	0.004	0.006	0.133	0.004	0.080	299.150	0.760	0.2664924E-03	11.44154	0.7128995E-02	0.2054560
08192011	10	0.004	0.050	0.106	0.000	0.002	0.002	0.003	0.005	0.100	0.002	0.064	300.855	0.691	0.8523524E-02	6.628086	0.7861149E-02	-0.7409795E-01
08192011	11	0.003	0.109	0.153	0.000	0.001	0.002	0.003	0.004	0.085	0.001	0.058	302.558	0.617	0.1559675E-02	4.620224	0.8205383E-02	-0.2494359
08192011	12	0.001	0.209	0.195	0.000	0.001	0.001	0.002	0.004	0.075	0.000	0.070	303.681	0.565	0.9942055E-04	4.288606	0.3046659E-02	0.1484924
08192011	13	0.001	0.194	0.251	0.000	0.001	0.002	0.003	0.006	0.080	0.000	0.080	304.816	0.521	0.7408857E-04	4.238241	0.2471362E-02	0.2342494
08192011	14	0.000	0.230	0.252	0.000	0.001	0.001	0.003	0.009	0.071	0.000	0.091	307.379	0.445	0.9536743E-06	4.133302	0.5601054E-02	-0.1319727
08192011	15	0.000	0.192	0.139	0.000	0.001	0.001	0.002	0.006	0.053	0.000	0.088	306.882	0.432	0.5364418E-06	5.229410	0.2458495E-01	-0.6722168
08192011	16	0.000	0.136	0.101	0.000	0.001	0.001	0.002	0.006	0.050	0.000	0.081	306.502	0.437	0.5960464E-06	4.788030	0.2054964E-01	-0.6326475
08192011	17	0.000	0.106	0.080	0.000	0.001	0.001	0.002	0.006	0.050	0.000	0.081	306.135	0.448	0.7748604E-06	4.927417	0.2060366E-01	-0.6213250
08192011	18	0.000	0.090	0.063	0.000	0.001	0.001	0.002	0.008	0.052	0.000	0.083	305.201	0.465	0.1132488E-05	5.065697	0.1869146E-01	-0.5670039
08192011	19	0.000	0.095	0.062	0.000	0.001	0.001	0.004	0.014	0.064	0.000	0.084	303.787	0.487	0.1299381E-04	3.721457	0.1362730E-02	0.4363031
08192011	20	0.005	0.103	0.064	0.000	0.001	0.002	0.006	0.025	0.092	0.000	0.086	302.052	0.538	0.9274483E-03	3.954658	0.9080738E-02	-0.3610122
08192011	21	0.008	0.100	0.062	0.000	0.001	0.003	0.007	0.029	0.109	0.001	0.088	300.646	0.600	0.2565664E-01	7.352757	0.8698893E-02	-0.7301379E-01
08192011	22	0.006	0.092	0.056	0.000	0.001	0.002	0.006	0.025	0.115	0.001	0.090	299.342	0.661	0.2724230E-01	7.124111	0.7462086E-02	-0.2012962E-01
08192011	23	0.003	0.085	0.049	0.000	0.001	0.002	0.004	0.015	0.115	0.001	0.090	298.539	0.694	0.2887011E-02	7.860633	0.1151898E-01	-0.1659566
08192011	24	0.002	0.085	0.044	0.001	0.001	0.002	0.003	0.009	0.111	0.001	0.086	297.984	0.721	0.000000	8.758957	0.1222409E-01	-0.1447642
08202011	01	0.002	0.084	0.041	0.001	0.001	0.001	0.003	0.008	0.109	0.001	0.078	297.528	0.750	0.000000	9.145821	0.1039184E-01	-0.5546989E-01
08202011	02	0.004	0.082	0.039	0.001	0.001	0.001	0.003	0.007	0.106	0.001	0.069	297.190	0.772	0.000000	9.162000	0.7071787E-02	0.1124611
08202011	03	0.005	0.078	0.038	0.001	0.001	0.001	0.003	0.006	0.100	0.002	0.061	296.974	0.783	0.3747344E-03	8.982655	0.5466911E-02	0.2156627
08202011	04	0.010	0.076	0.038	0.001	0.001	0.001	0.003	0.005	0.092	0.002	0.054	296.785	0.794	0.3701347E-01	8.064820	0.6296794E-03	1.107475
08202011	05	0.020	0.076	0.038	0.001	0.001	0.001	0.003	0.005	0.082	0.002	0.048	296.599	0.806	0.4804182E-01	7.855125	0.4127239E-03	1.279493
08202011	06	0.030	0.080	0.036	0.001	0.001	0.001	0.003	0.005	0.077	0.003	0.045	296.406	0.822	0.7329512E-01	7.839890	0.2474204E-03	1.500875
08202011	07	0.044	0.087	0.036	0.001	0.002	0.002	0.003	0.004	0.073	0.005	0.042	296.750	0.837	0.1148859	8.656673	0.1422214E-03	1.784386
08202011	08	0.053	0.089	0.066	0.001	0.002	0.002	0.003	0.004	0.073	0.008	0.040	298.971	0.785	0.7662052E-01	6.496532	0.1243620E-03	1.717994
08202011	09	0.039	0.071	0.098	0.000	0.002	0.002	0.003	0.005	0.064	0.005	0.038	299.989	0.756	NaN	8.444229	0.4556514E-01	-0.7320727
08202011	10	0.022	0.080	0.113	0.000	0.002	0.001	0.003	0.007	0.061	0.002	0.040	301.719	0.693	NaN	5.067373	0.8564921E-01	-1.227941
08202011	11	0.003	0.223	0.120	0.000	0.001	0.001	0.002	0.006	0.073	0.001	0.055	304.499	0.593	0.4311204E-03	3.574674	0.7707874E-02	-0.3336982
08202011	12	0.001	0.210	0.107	0.000	0.001	0.001	0.002	0.005	0.067	0.000	0.058	305.778	0.544	0.1010895E-03	3.130744	0.3781237E-02	-0.8198638E-01
08202011	13	0.001	0.148	0.088	0.000	0.001	0.001	0.002	0.005	0.055	0.000	0.055	306.561	0.522	0.4887581E-04	2.836196	0.2109859E-02	0.1284828
08202011	14	0.000	0.106	0.073	0.000	0.001	0.001	0.002	0.005	0.044	0.000	0.054	306.566	0.522	0.6318092E-05	2.974902	0.1842348E-02	0.2081009
08202011	15	0.000	0.088	0.062	0.000	0.001	0.001	0.002	0.005	0.039	0.000	0.053	305.833	0.537	0.3695488E-05	3.444529	0.4953408E-02	-0.1577742
08202011	16	0.000	0.076	0.054	0.000	0.001	0.001	0.002	0.004	0.035	0.000	0.050	304.913	0.564	0.4649162E-05	3.701077	0.6956717E-02	-0.2740763
08202011	17	0.000	0.047	0.042	0.000	0.000	0.001	0.001	0.004	0.030	0.000	0.049	303.538	0.602	0.7748604E-05	4.591736	0.1323780E-01	-0.4598390
08202011	18	0.000	0.030	0.034	0.000	0.000	0.001	0.002	0.005	0.030	0.000	0.049	302.018	0.648	0.2026558E-04	5.083376	0.1172813E-01	-0.3630764
08202011	19	0.000	0.041	0.034	0.000	0.001	0.001	0.002	0.008	0.036	0.000	0.050	300.614	0.692	0.8112192E-04	4.804827	0.4946570E-02	-0.1262640E-01
08202011	20	0.001	0.042	0.033	0.000	0.001	0.001	0.003	0.009	0.040	0.000	0.051	299.571	0.730	0.2955198E-03	5.313680	0.4397498E-02	0.8218972E-01
08202011	21	0.001	0.040	0.032	0.000	0.001	0.001	0.003	0.010	0.045	0.000	0.052	298.233	0.783	0.8462667E-03	6.453920	0.5736776E-02	0.5115569E-01
08202011	22	0.002	0.036	0.032	0.000	0.001	0.002	0.003	0.012	0.052	0.000	0.051	297.434	0.822	0.3893793E-02	7.019633	0.5885703E-02	0.7651606E-01
08202011	23	0.001	0.036	0.031	0.000	0.001	0.001	0.002	0.007	0.048	0.000	0.049	296.970	0.853	0.2579689E-02	9.277531	0.7248404E-02	0.1071900
08202011	24	0.001	0.038	0.025	0.000	0.001	0.001	0.002	0.004	0.044	0.000	0.045	296.659	0.875	0.3595054E-02	11.29391	0.7977875E-02	0.1509569
08212011	01	0.001	0.038	0.020	0.000	0.001	0.001	0.001	0.003	0.041	0.000	0.040	296.372	0.896	0.5154967E-02	12.04351	0.7589078E-02	0.2005640
08212011	02	0.001	0.036	0.017	0.001	0.001	0.001	0.001	0.002	0.039	0.000	0.037	296.254	0.882	0.000000	9.593265	0.6760651E-02	0.1519779
08212011	03	0.001	0.036	0.016	0.001	0.001	0.000	0.001	0.002	0.038	0.000	0.034	295.946	0.908	0.000000	11.46891	0.6664067E-02	0.2357829
08212011	04	0.001	0.038	0.016	0.001	0.001	0.000	0.001	0.001	0.039	0.000	0.032	295.840	0.906	0.000000	11.00595	0.6096670E-02	0.2565348
08212011	05	0.002	0.043	0.017	0.001	0.001	0.001	0.001	0.001	0.043	0.000	0.031	295.705	0.905	0.000000	10.52097	0.4795927E-02	0.3411833
08212011	06	0.004	0.050	0.019	0.001	0.001	0.001	0.001	0.001	0.050	0.001	0.030	295.532	0.914	0.1392961E-03	10.51845	0.3655639E-02	0.4589884
08212011	07	0.014	0.058	0.021	0.001	0.001	0.001	0.002	0.002	0.052	0.002	0.029	295.870	0.915	0.8296710E-01	11.31862	0.2391478E-03	1.675127
08212011	08	0.020	0.058	0.043	0.001	0.001	0.001	0.002	0.002	0.051	0.003	0.028	297.596	0.872	0.4232186E-01	6.883433	0.2071939E-03	1.521428
08212011	09	0.023	0.052	0.070	0.000	0.001	0.001	0.002	0.002	0.047	0.003	0.027	299.264	0.817	NaN	7.608383	0.3860201E-01	-0.7053176
08212011	10	0.015	0.061	0.095	0.000	0.001	0.001	0.002	0.003	0.041	0.001	0.026	300.897	0.757	NaN	4.539659	0.7714885E-01	-1.230306
08212011	11	0.007	0.170	0.129	0.000	0.001	0.001	0.002	0.005	0.047	0.001	0.034	303.850	0.633	0.5853415E-02	2.948619	0.5955491E-02	-0.3052989
08212011	12	0.001	0.231	0.119	0.000	0.001	0.001	0.002	0.004	0.047	0.000	0.041	305.343	0.578	0.1280904E-03	2.525736	0.3743999E-02	-0.1709478
08212011	13	0.001	0.149	0.084	0.000	0.000	0.001	0.001	0.004	0.035	0.000	0.036	306.405	0.546	0.4434586E-04	2.037333	0.1819829E-02	0.4903147E-01
08212011	14	0.000	0.084	0.057	0.000	0.000	0.000	0.001	0.003	0.029	0.000	0.038	306.512	0.543	0.1668930E-05	2.557096	0.5611128E-02	-0.3413032
08212011	15	0.000	0.062	0.046	0.000	0.000	0.000	0.001	0.003	0.028	0.000	0.039	305.800	0.560	0.2324581E-05	2.949457	0.7714183E-02	-0.4175478
08212011	16	0.000	0.047	0.043	0.000	0.000	0.000	0.001	0.003	0.027	0.000	0.043	304.844	0.583	0.3695488E-05	3.822434	0.1295133E-01	-0.5299742
08212011	17	0.000	0.030	0.036	0.000	0.000	0.000	0.001	0.004	0.024	0.000	0.044	303.489	0.625	0.8940697E-05	4.680097	0.1639581E-01	-0.5444781
08212011	18	0.000	0.034	0.039	0.000	0.001	0.001	0.002	0.006	0.030	0.000	0.045	302.199	0.676	0.4082918E-04	4.574600	0.6418065E-02	-0.1470510
08212011	19	0.001	0.048	0.055	0.000	0.001	0.001	0.003	0.011	0.042	0.000	0.047	301.024	0.724	0.4746318E-03	4.199583	0.4357028E-02	-0.1598417E-01
08212011	20	0.003	0.060	0.062	0.000	0.001	0.002	0.004	0.014	0.050	0.000	0.048	300.002	0.761	0.4893005E-02	4.840491	0.5250388E-02	-0.3530200E-01
08212011	21	0.005	0.065	0.066	0.000	0.001	0.002	0.004	0.015	0.053	0.000	0.048	299.328	0.786	0.1824850E-01	5.807375	0.5307201E-02	0.3911434E-01
08212011	22	0.005	0.062	0.059	0.000	0.001	0.002	0.003	0.014	0.053	0.000	0.045	298.782	0.811	0.2473825E-01	7.082780	0.5500028E-02	0.1098389
08212011	23	0.004	0.048	0.043	0.000	0.001	0.001	0.003	0.011	0.047	0.000	0.039	298.338	0.835	0.2496195E-01	6.341638	0.4722409E-02	0.1280378
08212011	24	0.008	0.035	0.027	0.000	0.001	0.001	0.002	0.010	0.035	0.000	0.028	298.016	0.848	NaN	5.733017	0.9206057E-02	-0.2056904
08222011	01	0.016	0.028	0.018	0.000	0.000	0.000	0.002	0.008	0.021	0.000	0.020	297.684	0.867	NaN	5.423379	0.1853780E-02	0.4662119
08222011	02	0.021	0.027	0.014	0.000	0.000	0.000	0.002	0.007	0.012	0.000	0.014	297.392	0.879	NaN	4.506899	0.1959213E-03	1.361796
08222011	03	0.028	0.030	0.013	0.000	0.001	0.000	0.002	0.007	0.006	0.000	0.012	297.176	0.883	NaN	3.843609	0.7589246E-04	1.704541
08222011	04	0.040	0.035	0.013	0.000	0.001	0.001	0.002	0.009	0.001	0.000	0.011	297.022	0.882	NaN	3.055710	0.2486340E-04	2.089552
08222011	05	0.054	0.043	0.015	0.000	0.001	0.001	0.003	0.012	0.000	0.000	0.010	296.907	0.878	NaN	2.904474	0.4195565E-04	1.840277
08222011	06	0.076	0.054	0.008	0.002	0.001	0.002	0.004	0.016	0.000	0.009	0.010	296.771	0.879	NaN	4.142729	0.3703871E-09	7.048631
08222011	07	0.096	0.068	0.000	0.004	0.001	0.003	0.005	0.021	0.000	0.022	0.011	297.188	0.870	NaN	5.247098	0.4742196E-09	7.043940
08222011	08	0.060	0.070	0.000	0.006	0.002	0.003	0.005	0.022	0.026	0.052	0.013	299.351	0.797	NaN	7.336022	0.4077386E-04	2.255079
08222011	09	0.050	0.054	0.060	0.001	0.001	0.002	0.004	0.015	0.007	0.008	0.015	301.261	0.724	0.000000	0.9976967E-09	0.1000002E-13	1.998998
08222011	10	0.016	0.063	0.065	0.000	0.001	0.001	0.002	0.007	0.018	0.001	0.017	303.393	0.641	NaN	1.817662	0.4545240E-01	-1.398044
08222011	11	0.003	0.071	0.069	0.000	0.000	0.000	0.001	0.004	0.025	0.000	0.019	305.442	0.552	0.9476542E-03	1.059018	0.4134458E-02	-0.5915154
08222011	12	0.002	0.053	0.055	0.000	0.000	0.000	0.001	0.003	0.025	0.000	0.020	306.878	0.493	0.4845858E-04	0.8503406	0.3631230E-02	-0.6304608
08222011	13	0.004	0.048	0.043	0.000	0.000	0.000	0.001	0.003	0.028	0.000	0.020	308.123	0.457	0.6206632E-03	0.9211580	0.4902571E-02	-0.7260898
08222011	14	0.009	0.045	0.039	0.000	0.000	0.000	0.001	0.003	0.034	0.000	0.020	308.482	0.439	NaN	1.051405	0.2611821E-01	-1.395173
08222011	15	0.011	0.036	0.035	0.000	0.000	0.000	0.001	0.003	0.037	0.000	0.022	308.000	0.434	NaN	1.133474	0.2055866E-01	-1.258583
08222011	16	0.012	0.028	0.029	0.000	0.000	0.000	0.001	0.003	0.037	0.000	0.022	307.386	0.434	NaN	1.146100	0.1356084E-01	-1.073064
08222011	17	0.019	0.022	0.023	0.000	0.000	0.000	0.001	0.003	0.032	0.000	0.020	306.476	0.438	NaN	1.160937	0.3449881E-02	-0.4729955
08222011	18	0.041	0.020	0.021	0.000	0.000	0.001	0.002	0.006	0.023	0.000	0.019	305.339	0.447	NaN	1.077171	0.6897132E-04	1.193616
08222011	19	0.064	0.025	0.018	0.000	0.001	0.001	0.003	0.012	0.010	0.000	0.019	303.753	0.474	NaN	0.7546138	0.8076034E-05	1.970527
08222011	20	0.071	0.027	0.012	0.001	0.001	0.001	0.004	0.017	0.001	0.000	0.019	302.308	0.496	0.3158033E-02	0.4081802E-01	0.2609306E-08	4.194327
08222011	21	0.056	0.021	0.009	0.001	0.001	0.001	0.003	0.015	0.002	0.000	0.018	301.216	0.514	0.1616156E-01	0.2115055	0.8649647E-07	3.388323
08222011	22	0.040	0.017	0.008	0.001	0.001	0.001	0.003	0.012	0.009	0.000	0.019	300.300	0.535	0.4635692E-02	0.5171947	0.1136504E-04	1.658083
08222011	23	0.024	0.016	0.008	0.001	0.001	0.001	0.002	0.010	0.015	0.000	0.019	299.377	0.565	0.7165074E-02	0.7243995	0.2370106E-04	1.485210
08222011	24	0.020	0.017	0.008	0.001	0.001	0.001	0.002	0.010	0.016	0.000	0.020	298.531	0.593	0.9270191E-02	0.8734078	0.3300129E-04	1.422686
08232011	01	0.019	0.018	0.008	0.001	0.001	0.000	0.003	0.010	0.015	0.000	0.019	297.596	0.636	0.9078205E-02	0.8306759	0.3431764E-04	1.383914
08232011	02	0.021	0.018	0.007	0.001	0.001	0.000	0.003	0.010	0.014	0.000	0.019	296.960	0.656	0.1065892E-01	0.8898701	0.3570517E-04	1.396595
08232011	03	0.026	0.019	0.008	0.001	0.001	0.000	0.003	0.010	0.010	0.000	0.018	296.476	0.663	0.9029686E-02	0.7873060	0.3429393E-04	1.360926
08232011	04	0.037	0.024	0.008	0.001	0.001	0.001	0.003	0.012	0.005	0.000	0.017	296.038	0.666	0.1021260E-01	0.5664006	0.6613116E-05	1.932718
08232011	05	0.057	0.035	0.009	0.001	0.001	0.001	0.004	0.015	0.001	0.001	0.017	295.877	0.647	0.1860487E-01	0.1372110	0.3883352E-07	3.548182
08232011	06	0.077	0.053	0.009	0.001	0.001	0.002	0.005	0.019	0.001	0.000	0.019	295.674	0.637	0.000000	0.4291263E-08	0.3130841E-18	7.136924
08232011	07	0.089	0.073	0.010	0.001	0.002	0.003	0.007	0.024	0.001	0.001	0.022	295.735	0.646	0.000000	0.4630472E-08	0.3410160E-18	7.132851
08232011	08	0.076	0.081	0.022	0.001	0.002	0.003	0.007	0.024	0.003	0.002	0.025	297.467	0.586	0.4148722E-02	0.4443595E-01	0.1106966E-07	3.603600
08232011	09	0.026	0.071	0.038	0.001	0.001	0.001	0.004	0.012	0.031	0.001	0.031	299.190	0.523	0.6255269E-02	1.282903	0.1216370E-03	1.023128
08232011	10	0.001	0.061	0.045	0.000	0.001	0.001	0.002	0.006	0.045	0.000	0.037	300.818	0.474	0.1045465E-03	1.511862	0.7733014E-02	-0.7088366
08232011	11	0.001	0.053	0.049	0.000	0.001	0.001	0.002	0.005	0.044	0.000	0.037	302.265	0.439	0.3838539E-04	1.324069	0.6643347E-02	-0.7004764
08232011	12	0.001	0.045	0.048	0.000	0.000	0.000	0.002	0.004	0.043	0.000	0.035	303.472	0.409	0.1633167E-04	1.044811	0.3021352E-02	-0.4611638
08232011	13	0.002	0.039	0.053	0.000	0.000	0.000	0.001	0.004	0.044	0.000	0.033	304.522	0.381	0.2080202E-04	0.9603512	0.8257846E-02	-0.9344367
08232011	14	0.004	0.034	0.058	0.000	0.000	0.000	0.002	0.005	0.044	0.000	0.031	305.088	0.365	0.4193783E-03	1.028358	0.5437021E-02	-0.7232168
08232011	15	0.006	0.029	0.060	0.000	0.000	0.001	0.002	0.005	0.043	0.000	0.028	304.968	0.362	NaN	1.031024	0.5268526E-01	-1.708420
08232011	16	0.013	0.026	0.060	0.000	0.000	0.001	0.002	0.005	0.040	0.000	0.026	304.505	0.364	NaN	1.021192	0.4441071E-01	-1.638380
08232011	17	0.023	0.025	0.056	0.000	0.000	0.001	0.002	0.005	0.038	0.000	0.025	303.693	0.370	NaN	1.117193	0.2879225E-01	-1.411147
08232011	18	0.037	0.027	0.048	0.000	0.000	0.001	0.002	0.006	0.036	0.000	0.026	302.764	0.377	NaN	1.289765	0.7813289E-02	-0.7823234
08232011	19	0.075	0.037	0.039	0.000	0.001	0.001	0.004	0.014	0.019	0.000	0.027	301.365	0.398	NaN	1.080584	0.1384808E-04	1.892269
08232011	20	0.122	0.047	0.037	0.000	0.001	0.002	0.006	0.025	0.003	0.000	0.028	299.723	0.419	NaN	0.5443743	0.3115311E-06	3.242396
08232011	21	0.142	0.048	0.034	0.000	0.001	0.002	0.006	0.026	0.004	0.001	0.028	298.493	0.431	NaN	0.5390224	0.2463635E-06	3.340030
08232011	22	0.147	0.046	0.027	0.000	0.001	0.002	0.006	0.023	0.004	0.001	0.029	297.441	0.460	NaN	0.8315281	0.7469072E-06	3.046610
08232011	23	0.138	0.047	0.023	0.001	0.001	0.002	0.006	0.022	0.007	0.001	0.031	296.600	0.496	0.2445042E-01	0.5905032	0.2899620E-05	2.308881
08232011	24	0.128	0.049	0.022	0.001	0.001	0.002	0.006	0.022	0.010	0.001	0.032	295.896	0.534	0.3170300E-01	0.7235504	0.4367113E-05	2.219275
08242011	01	0.116	0.053	0.021	0.001	0.001	0.002	0.006	0.022	0.013	0.002	0.033	295.221	0.575	0.4235202E-01	0.9090832	0.6086772E-05	2.174217
08242011	02	0.101	0.058	0.021	0.001	0.001	0.002	0.006	0.022	0.015	0.002	0.034	294.587	0.621	0.5603456E-01	1.172584	0.8298827E-05	2.150127
08242011	03	0.084	0.062	0.020	0.001	0.001	0.002	0.007	0.022	0.017	0.002	0.035	294.357	0.639	0.5785263E-01	1.328548	0.1026104E-04	2.112186
08242011	04	0.073	0.066	0.019	0.001	0.001	0.002	0.007	0.024	0.016	0.002	0.037	294.185	0.648	0.5450511E-01	1.368634	0.1174992E-04	2.066253
08242011	05	0.077	0.073	0.019	0.001	0.001	0.002	0.008	0.026	0.013	0.003	0.038	293.960	0.669	0.6623626E-01	1.359267	0.7487388E-05	2.258975
08242011	06	0.093	0.084	0.019	0.001	0.002	0.003	0.009	0.030	0.008	0.004	0.040	293.820	0.685	0.1366892	1.397671	0.1683474E-05	2.919199
08242011	07	0.106	0.098	0.023	0.001	0.002	0.005	0.011	0.037	0.007	0.004	0.042	294.110	0.694	0.7492948E-01	0.5286707	0.2017378E-06	3.418398
08242011	08	0.084	0.098	0.043	0.001	0.002	0.005	0.011	0.035	0.008	0.007	0.043	295.908	0.670	0.7387012E-01	0.9842920	0.8287900E-06	3.074679
08242011	09	0.047	0.102	0.073	0.000	0.001	0.003	0.007	0.021	0.031	0.004	0.041	298.196	0.630	NaN	4.059300	0.1879426E-01	-0.6655741
08242011	10	0.013	0.176	0.100	0.000	0.001	0.001	0.004	0.012	0.049	0.001	0.040	300.466	0.579	NaN	2.680299	0.8667616E-01	-1.509717
08242011	11	0.003	0.199	0.132	0.000	0.001	0.001	0.003	0.010	0.051	0.000	0.043	302.542	0.529	0.6588101E-03	2.131710	0.5871872E-02	-0.4400484
08242011	12	0.001	0.185	0.147	0.000	0.001	0.001	0.003	0.008	0.049	0.000	0.046	304.215	0.488	0.6455183E-04	1.850757	0.3445617E-02	-0.2699175
08242011	13	0.001	0.168	0.150	0.000	0.001	0.001	0.002	0.007	0.052	0.000	0.050	305.565	0.461	0.3743172E-04	1.921435	0.2242461E-02	-0.6709936E-01
08242011	14	0.001	0.150	0.154	0.000	0.001	0.001	0.002	0.007	0.052	0.000	0.052	306.248	0.448	0.2908707E-04	1.953462	0.1805738E-02	0.3415016E-01
08242011	15	0.001	0.124	0.155	0.000	0.001	0.001	0.002	0.008	0.051	0.000	0.052	306.112	0.444	0.2658367E-04	1.837871	0.1740790E-02	0.2356856E-01
08242011	16	0.001	0.101	0.150	0.000	0.001	0.001	0.002	0.008	0.051	0.000	0.050	305.569	0.446	0.3409386E-04	1.806553	0.2193340E-02	-0.8425514E-01
08242011	17	0.001	0.089	0.141	0.000	0.001	0.001	0.002	0.008	0.054	0.000	0.049	304.703	0.450	0.4291534E-04	1.732323	0.3320337E-02	-0.2825532
08242011	18	0.003	0.084	0.123	0.000	0.001	0.001	0.003	0.009	0.059	0.000	0.047	303.700	0.454	0.2896190E-03	1.871483	0.6865002E-02	-0.5644549
08242011	19	0.024	0.088	0.093	0.000	0.001	0.002	0.004	0.016	0.056	0.000	0.047	302.409	0.464	NaN	2.288053	0.6308088E-01	-1.440432
08242011	20	0.071	0.095	0.076	0.000	0.001	0.002	0.006	0.027	0.028	0.001	0.047	300.775	0.490	NaN	2.694434	0.3903052E-02	-0.1609368
08242011	21	0.082	0.091	0.081	0.000	0.001	0.003	0.007	0.029	0.021	0.001	0.045	299.558	0.522	NaN	3.100694	0.2155193E-03	1.157973
08242011	22	0.078	0.080	0.079	0.000	0.001	0.002	0.007	0.027	0.024	0.001	0.044	298.586	0.557	NaN	3.593109	0.6753606E-03	0.7259346
08242011	23	0.072	0.068	0.068	0.000	0.001	0.002	0.006	0.023	0.029	0.002	0.042	297.786	0.594	NaN	3.942927	0.2870306E-03	1.137890
08242011	24	0.068	0.058	0.050	0.000	0.001	0.002	0.006	0.022	0.029	0.002	0.040	297.071	0.636	NaN	3.975024	0.7106389E-04	1.747691
08252011	01	0.064	0.050	0.033	0.000	0.001	0.002	0.006	0.021	0.028	0.002	0.039	296.447	0.679	NaN	3.805963	0.4997334E-04	1.881726
08252011	02	0.056	0.050	0.023	0.000	0.001	0.002	0.006	0.020	0.029	0.001	0.039	295.980	0.712	NaN	3.767644	0.5405106E-04	1.843266
08252011	03	0.047	0.067	0.018	0.000	0.001	0.001	0.006	0.020	0.030	0.001	0.039	295.698	0.732	NaN	3.698723	0.7126565E-04	1.715172
08252011	04	0.048	0.104	0.017	0.000	0.001	0.002	0.006	0.021	0.028	0.001	0.040	295.428	0.762	NaN	4.191902	0.6178712E-04	1.831513
08252011	05	0.060	0.147	0.017	0.001	0.002	0.002	0.007	0.025	0.021	0.002	0.040	295.205	0.788	0.8316416E-01	2.656868	0.1857082E-04	2.155539
08252011	06	0.087	0.183	0.014	0.001	0.002	0.003	0.008	0.030	0.008	0.003	0.039	295.038	0.808	0.1845185	2.042277	0.1847818E-05	3.043456
08252011	07	0.103	0.207	0.016	0.001	0.002	0.005	0.010	0.037	0.003	0.002	0.038	295.332	0.826	0.3175277E-01	0.2512794	0.1186347E-06	3.325945
08252011	08	0.081	0.208	0.037	0.001	0.002	0.005	0.011	0.041	0.004	0.002	0.037	297.389	0.776	0.000000	0.1834649E-08	0.1000684E-13	2.263256
08252011	09	0.041	0.200	0.067	0.000	0.002	0.003	0.006	0.024	0.007	0.003	0.030	299.497	0.696	NaN	3.482402	0.1886224E-01	-0.7337143
08252011	10	0.023	0.148	0.092	0.000	0.001	0.001	0.004	0.014	0.013	0.001	0.025	301.769	0.608	NaN	1.750661	0.7142539E-01	-1.610651
08252011	11	0.005	0.101	0.113	0.000	0.001	0.001	0.003	0.010	0.027	0.000	0.025	303.740	0.533	0.4889071E-02	2.185025	0.5670138E-02	-0.4141372
08252011	12	0.002	0.084	0.132	0.000	0.001	0.001	0.002	0.008	0.033	0.000	0.031	305.329	0.483	0.1521707E-03	1.236502	0.4509467E-02	-0.5619304
08252011	13	0.001	0.065	0.136	0.000	0.001	0.001	0.002	0.007	0.036	0.000	0.034	306.826	0.441	0.3862381E-04	1.115691	0.3165397E-02	-0.4528843
08252011	14	0.001	0.057	0.131	0.000	0.001	0.001	0.002	0.007	0.037	0.000	0.035	307.622	0.418	0.3039837E-04	1.065317	0.2918613E-02	-0.4376977
08252011	15	0.001	0.044	0.109	0.000	0.001	0.001	0.002	0.006	0.037	0.000	0.036	307.425	0.420	0.2443790E-04	1.155934	0.2155506E-02	-0.2706163
08252011	16	0.001	0.032	0.089	0.000	0.001	0.001	0.002	0.006	0.039	0.000	0.036	306.979	0.425	0.3170967E-04	1.187734	0.2774470E-02	-0.3684610
08252011	17	0.002	0.027	0.074	0.000	0.000	0.001	0.002	0.006	0.042	0.000	0.036	306.068	0.437	0.5215406E-04	1.259059	0.4048027E-02	-0.5071973
08252011	18	0.006	0.032	0.063	0.000	0.001	0.001	0.002	0.008	0.048	0.000	0.037	304.928	0.456	0.5146801E-02	1.803439	0.5882005E-02	-0.5134239
08252011	19	0.040	0.051	0.057	0.000	0.001	0.002	0.004	0.016	0.036	0.000	0.038	303.359	0.486	NaN	2.263411	0.1065540E-01	-0.6728064
08252011	20	0.088	0.076	0.059	0.000	0.001	0.002	0.007	0.028	0.012	0.001	0.040	301.842	0.512	NaN	2.152357	0.1969612E-04	2.038534
08252011	21	0.106	0.085	0.070	0.000	0.001	0.003	0.008	0.030	0.006	0.001	0.040	300.776	0.533	NaN	2.524997	0.1239562E-04	2.308993
08252011	22	0.110	0.086	0.079	0.000	0.001	0.003	0.008	0.030	0.006	0.001	0.039	299.883	0.551	NaN	2.933214	0.1447912E-04	2.306602
08252011	23	0.110	0.081	0.082	0.000	0.001	0.002	0.008	0.029	0.007	0.001	0.039	299.100	0.578	NaN	3.456365	0.2419633E-04	2.154870
08252011	24	0.107	0.074	0.081	0.000	0.001	0.002	0.008	0.029	0.007	0.002	0.038	298.383	0.612	NaN	3.850475	0.2709857E-04	2.152568
08262011	01	0.101	0.065	0.072	0.000	0.001	0.002	0.008	0.029	0.008	0.002	0.038	297.749	0.648	NaN	4.190544	0.2789176E-04	2.176795
08262011	02	0.095	0.057	0.057	0.000	0.001	0.002	0.007	0.028	0.008	0.003	0.037	297.314	0.681	NaN	4.090505	0.2380449E-04	2.235118
08262011	03	0.095	0.056	0.041	0.000	0.001	0.002	0.008	0.028	0.008	0.003	0.037	297.019	0.710	NaN	3.726799	0.1458225E-04	2.407511
08262011	04	0.102	0.062	0.031	0.000	0.001	0.002	0.008	0.030	0.006	0.003	0.037	296.761	0.736	NaN	3.335052	0.8402430E-05	2.598698
08262011	05	0.118	0.073	0.025	0.001	0.002	0.003	0.009	0.033	0.004	0.004	0.038	296.579	0.752	0.7761955E-01	0.7797576	0.4175546E-06	3.271246
08262011	06	0.145	0.090	0.022	0.000	0.002	0.004	0.010	0.039	0.003	0.002	0.038	296.357	0.776	NaN	2.099136	0.6872150E-05	2.484948
08262011	07	0.166	0.109	0.019	0.000	0.002	0.006	0.013	0.048	0.003	0.002	0.039	296.558	0.797	NaN	2.088919	0.6367731E-05	2.515937
08262011	08	0.136	0.116	0.035	0.000	0.003	0.007	0.014	0.052	0.004	0.003	0.038	298.589	0.748	NaN	2.856695	0.1135956E-04	2.400502
08262011	09	0.093	0.157	0.068	0.000	0.002	0.004	0.010	0.035	0.007	0.005	0.038	300.566	0.678	NaN	3.968222	0.4314580E-04	1.963657
08262011	10	0.070	0.216	0.116	0.000	0.001	0.003	0.007	0.024	0.023	0.003	0.040	302.958	0.598	NaN	4.088720	0.3712935E-01	-0.9581301
08262011	11	0.048	0.272	0.162	0.000	0.001	0.002	0.005	0.016	0.056	0.001	0.048	305.291	0.522	NaN	3.415590	0.1087520	-1.502971
08262011	12	0.023	0.254	0.191	0.000	0.001	0.001	0.004	0.012	0.093	0.001	0.062	306.880	0.478	NaN	3.475476	0.1659201	-1.678885
08262011	13	0.008	0.203	0.175	0.000	0.001	0.001	0.003	0.010	0.107	0.000	0.070	308.363	0.440	0.4632115E-02	3.350641	0.1036198E-01	-0.4903149
08262011	14	0.002	0.135	0.143	0.000	0.001	0.001	0.003	0.009	0.102	0.000	0.080	307.589	0.444	0.7963181E-04	2.855124	0.6353773E-02	-0.3474066
08262011	15	0.002	0.079	0.132	0.000	0.001	0.001	0.003	0.010	0.103	0.000	0.089	307.274	0.447	0.6294250E-04	3.291248	0.4069886E-02	-0.9222164E-01
08262011	16	0.003	0.033	0.132	0.000	0.001	0.002	0.003	0.011	0.104	0.000	0.081	305.856	0.495	0.2596378E-03	3.772340	0.9186684E-02	-0.3865480
08262011	17	0.006	0.020	0.136	0.000	0.001	0.002	0.002	0.006	0.100	0.000	0.065	305.445	0.487	0.2100348E-02	3.616153	0.8908300E-02	-0.3915480
08262011	18	0.012	0.020	0.124	0.000	0.001	0.001	0.002	0.004	0.092	0.001	0.053	304.387	0.477	NaN	3.221942	0.1110222	-1.537292
08262011	19	0.033	0.026	0.102	0.000	0.001	0.002	0.002	0.004	0.081	0.001	0.047	302.062	0.576	NaN	4.707781	0.6041440E-01	-1.108324
08262011	20	0.035	0.027	0.066	0.000	0.001	0.001	0.001	0.003	0.070	0.001	0.040	300.452	0.607	NaN	4.615227	0.2496402E-01	-0.7331214
08262011	21	0.030	0.026	0.039	0.001	0.001	0.001	0.001	0.002	0.058	0.001	0.033	299.500	0.596	0.1265854E-01	2.719216	0.2630542E-03	1.014398
08262011	22	0.024	0.027	0.020	0.001	0.001	0.001	0.001	0.002	0.049	0.000	0.028	298.760	0.623	0.1709479E-01	2.428151	0.1813344E-03	1.126795
08262011	23	0.014	0.023	0.012	0.002	0.001	0.001	0.001	0.001	0.048	0.000	0.026	298.288	0.653	0.2235025E-01	2.551565	0.1388413E-03	1.264288
08262011	24	0.006	0.019	0.009	0.002	0.001	0.000	0.001	0.001	0.048	0.000	0.026	297.897	0.685	0.2837735E-01	2.824551	0.1353020E-03	1.319645
08272011	01	0.003	0.016	0.009	0.002	0.001	0.000	0.001	0.001	0.047	0.000	0.027	297.708	0.713	0.2079606E-03	3.140380	0.3770217E-02	-0.7938416E-01
08272011	02	0.004	0.014	0.009	0.001	0.001	0.000	0.001	0.001	0.045	0.000	0.026	297.607	0.720	0.3132135E-01	3.125681	0.1389197E-03	1.352181
08272011	03	0.004	0.013	0.010	0.001	0.001	0.000	0.001	0.001	0.044	0.000	0.025	297.494	0.726	0.2947176E-01	3.109744	0.1424582E-03	1.339037
08272011	04	0.004	0.013	0.009	0.001	0.001	0.000	0.001	0.001	0.042	0.000	0.025	296.897	0.777	0.2704859E-03	3.773123	0.3499202E-02	0.3273196E-01
08272011	05	0.004	0.014	0.010	0.001	0.001	0.000	0.001	0.001	0.045	0.000	0.027	296.404	0.799	0.000000	4.439067	0.3700493E-02	0.7903212E-01
08272011	06	0.003	0.020	0.013	0.002	0.001	0.001	0.001	0.001	0.056	0.000	0.034	295.911	0.817	0.000000	6.204376	0.4296476E-02	0.1595857
08272011	07	0.003	0.028	0.016	0.002	0.002	0.001	0.002	0.002	0.078	0.000	0.049	295.663	0.839	0.000000	9.766234	0.5629692E-02	0.2392425
08272011	08	0.004	0.038	0.023	0.002	0.002	0.001	0.002	0.002	0.112	0.001	0.069	297.478	0.766	0.000000	9.836404	0.8174763E-02	0.8036118E-01
08272011	09	0.003	0.055	0.035	0.003	0.002	0.001	0.003	0.003	0.141	0.002	0.088	298.815	0.715	0.000000	10.11925	0.1117609E-01	-0.4314141E-01
08272011	10	0.002	0.077	0.054	0.001	0.002	0.001	0.003	0.005	0.148	0.002	0.101	300.218	0.663	0.000000	8.814777	0.1538898E-01	-0.2419985
08272011	11	0.001	0.128	0.073	0.001	0.002	0.001	0.003	0.007	0.128	0.002	0.110	303.407	0.530	0.000000	5.868502	0.5175758E-02	0.5455327E-01
08272011	12	0.000	0.187	0.064	0.000	0.001	0.001	0.002	0.005	0.087	0.001	0.101	305.528	0.448	0.1370907E-05	4.667792	0.4840241E-02	-0.1575547E-01
08272011	13	0.000	0.141	0.043	0.000	0.001	0.001	0.002	0.004	0.073	0.000	0.081	306.744	0.406	0.2086163E-05	2.952876	0.8863438E-03	0.5226430
08272011	14	0.000	0.122	0.034	0.000	0.001	0.000	0.001	0.003	0.072	0.000	0.072	307.275	0.382	0.4112720E-05	2.251191	0.6589552E-03	0.5335564
08272011	15	0.001	0.114	0.031	0.000	0.001	0.000	0.001	0.003	0.076	0.000	0.067	307.030	0.370	0.1037121E-04	1.950720	0.1242245E-02	0.1959877
08272011	16	0.001	0.115	0.028	0.000	0.001	0.000	0.001	0.003	0.081	0.000	0.064	306.106	0.361	0.1406670E-04	1.742324	0.2231743E-02	-0.1075153
08272011	17	0.001	0.119	0.027	0.000	0.001	0.001	0.002	0.004	0.086	0.000	0.065	305.266	0.350	0.2086163E-04	1.685435	0.4234322E-02	-0.4000718
08272011	18	0.003	0.124	0.025	0.000	0.001	0.001	0.002	0.006	0.101	0.000	0.069	304.529	0.337	0.8922815E-04	2.014440	0.1264412E-01	-0.7977344
08272011	19	0.018	0.122	0.020	0.001	0.001	0.001	0.003	0.010	0.117	0.000	0.073	302.826	0.358	0.1586527E-01	2.632632	0.1916361E-03	1.137913
08272011	20	0.050	0.115	0.013	0.002	0.002	0.002	0.004	0.014	0.109	0.001	0.073	302.057	0.338	0.1755702E-01	2.342566	0.1522107E-03	1.187246
08272011	21	0.053	0.103	0.009	0.003	0.002	0.001	0.004	0.012	0.096	0.001	0.063	301.083	0.357	0.2011514E-01	2.134417	0.1343321E-03	1.201099
08272011	22	0.036	0.097	0.008	0.003	0.002	0.001	0.003	0.009	0.084	0.001	0.054	300.203	0.383	0.2124828E-01	2.032873	0.1312704E-03	1.189943
08272011	23	0.025	0.102	0.008	0.003	0.002	0.001	0.003	0.008	0.083	0.001	0.053	299.321	0.413	0.2443939E-01	2.237979	0.1520705E-03	1.167811
08272011	24	0.022	0.112	0.009	0.003	0.002	0.001	0.003	0.008	0.091	0.001	0.057	298.413	0.445	0.3027302E-01	2.748679	0.2116441E-03	1.113518
08282011	01	0.024	0.123	0.009	0.003	0.002	0.001	0.003	0.009	0.101	0.001	0.063	297.472	0.482	0.3676736E-01	3.306353	0.2520224E-03	1.117910
08282011	02	0.027	0.133	0.009	0.003	0.002	0.001	0.004	0.011	0.109	0.002	0.069	296.626	0.519	0.4348576E-01	3.959773	0.3257942E-03	1.084727
08282011	03	0.025	0.142	0.010	0.002	0.002	0.001	0.004	0.012	0.118	0.002	0.075	295.943	0.555	0.5174607E-01	4.823850	0.4079667E-03	1.072769
08282011	04	0.021	0.152	0.012	0.002	0.002	0.001	0.005	0.013	0.128	0.002	0.082	295.317	0.589	0.5779213E-01	5.740683	0.5204552E-03	1.042580
08282011	05	0.023	0.160	0.015	0.001	0.002	0.002	0.005	0.015	0.134	0.003	0.087	294.917	0.619	0.5863255E-01	6.615320	0.6370619E-03	1.016369
08282011	06	0.030	0.168	0.017	0.001	0.002	0.002	0.006	0.018	0.137	0.003	0.092	294.408	0.653	0.8618724E-01	7.455342	0.5191714E-03	1.157157
08282011	07	0.034	0.175	0.021	0.001	0.003	0.002	0.007	0.020	0.138	0.004	0.095	294.227	0.688	0.1189613	8.661273	0.4270265E-03	1.307127
08282011	08	0.027	0.175	0.032	0.001	0.003	0.002	0.007	0.020	0.146	0.005	0.098	295.784	0.661	0.6856769E-01	8.132627	0.6046834E-03	1.128703
08282011	09	0.004	0.180	0.063	0.001	0.002	0.002	0.006	0.016	0.149	0.002	0.104	298.253	0.584	0.000000	6.800446	0.1007571E-01	-0.1707381
08282011	10	0.001	0.185	0.091	0.000	0.002	0.002	0.005	0.013	0.124	0.001	0.106	300.730	0.502	0.1494884E-03	4.688200	0.1087295E-01	-0.3653413
08282011	11	0.001	0.185	0.102	0.000	0.002	0.002	0.005	0.012	0.115	0.001	0.104	302.895	0.434	0.6502867E-04	3.627627	0.3927096E-02	-0.3444884E-01
08282011	12	0.001	0.167	0.099	0.000	0.002	0.001	0.005	0.011	0.110	0.001	0.096	304.665	0.389	0.3767014E-04	2.791961	0.3549238E-02	-0.1042257
08282011	13	0.002	0.159	0.093	0.000	0.002	0.002	0.006	0.011	0.116	0.001	0.091	306.264	0.353	0.5918741E-04	2.420265	0.7989441E-02	-0.5186534
08282011	14	0.006	0.161	0.084	0.000	0.002	0.002	0.006	0.012	0.120	0.001	0.084	307.078	0.332	0.7382631E-03	2.555235	0.1002756E-01	-0.5937642
08282011	15	0.011	0.152	0.070	0.000	0.002	0.001	0.006	0.011	0.113	0.001	0.073	306.972	0.324	0.6944358E-02	2.927024	0.1062798E-01	-0.5600246
08282011	16	0.023	0.147	0.060	0.000	0.002	0.001	0.005	0.010	0.102	0.001	0.066	306.345	0.324	NaN	2.158414	0.3257944E-01	-1.178809
08282011	17	0.029	0.140	0.053	0.000	0.002	0.001	0.005	0.010	0.096	0.001	0.062	305.454	0.325	NaN	2.155215	0.1758160E-01	-0.9115679
08282011	18	0.035	0.137	0.048	0.000	0.002	0.001	0.005	0.010	0.091	0.001	0.060	304.448	0.326	NaN	2.114753	0.9772192E-02	-0.6647323
08282011	19	0.066	0.144	0.041	0.000	0.002	0.002	0.007	0.017	0.077	0.001	0.062	302.828	0.345	NaN	2.167491	0.2501213E-03	0.9378067
08282011	20	0.087	0.131	0.032	0.000	0.002	0.003	0.008	0.021	0.070	0.001	0.063	301.090	0.371	NaN	2.162129	0.1000182E-03	1.334803
08282011	21	0.055	0.097	0.026	0.001	0.002	0.002	0.007	0.016	0.090	0.001	0.068	299.837	0.403	0.1511657E-01	2.471284	0.2482931E-03	0.9979580
08282011	22	0.018	0.078	0.024	0.001	0.002	0.002	0.006	0.013	0.114	0.001	0.075	298.897	0.439	0.2371657E-01	3.357161	0.3875575E-03	0.9376360
08282011	23	0.004	0.066	0.023	0.001	0.002	0.001	0.005	0.011	0.115	0.001	0.079	298.111	0.476	0.000000	3.859898	0.8812825E-02	-0.3585393
08282011	24	0.001	0.055	0.023	0.001	0.002	0.001	0.005	0.012	0.099	0.001	0.080	297.381	0.515	0.000000	3.750570	0.2099743E-01	-0.7480689
08292011	01	0.001	0.046	0.020	0.001	0.002	0.001	0.005	0.013	0.094	0.001	0.080	296.654	0.556	0.000000	4.138165	0.2319744E-01	-0.7486323
08292011	02	0.002	0.040	0.017	0.000	0.002	0.001	0.005	0.015	0.097	0.001	0.077	296.031	0.590	0.1659453E-02	4.643926	0.1161609E-01	-0.3981747
08292011	03	0.004	0.037	0.015	0.001	0.002	0.001	0.005	0.016	0.099	0.001	0.073	295.689	0.604	0.000000	4.818574	0.5361351E-02	-0.4635565E-01
08292011	04	0.015	0.038	0.012	0.001	0.002	0.001	0.005	0.017	0.096	0.001	0.068	295.179	0.631	0.2090394E-02	8.152837	0.5965699E-02	0.1356474
08292011	05	0.040	0.042	0.012	0.001	0.002	0.002	0.006	0.020	0.081	0.001	0.065	294.768	0.656	0.7374120E-01	4.708030	0.2032530E-03	1.364802
08292011	06	0.068	0.050	0.010	0.001	0.002	0.003	0.007	0.024	0.066	0.002	0.063	294.473	0.672	0.1186542	4.307141	0.8739639E-04	1.692696
08292011	07	0.085	0.059	0.009	0.001	0.002	0.004	0.008	0.028	0.054	0.002	0.062	294.404	0.685	0.1490597	4.095071	0.4794459E-04	1.931522
08292011	08	0.073	0.058	0.019	0.001	0.002	0.003	0.008	0.028	0.054	0.003	0.061	295.926	0.644	0.7339954E-01	3.332239	0.6813011E-04	1.689397
08292011	09	0.028	0.069	0.040	0.000	0.002	0.002	0.006	0.017	0.077	0.002	0.060	298.238	0.569	NaN	4.339884	0.7479346E-02	-0.2363855
08292011	10	0.004	0.071	0.063	0.000	0.001	0.001	0.004	0.011	0.087	0.001	0.062	300.380	0.504	0.3042221E-02	3.140559	0.6859831E-02	-0.3393064
08292011	11	0.001	0.069	0.084	0.000	0.001	0.001	0.004	0.009	0.087	0.001	0.068	302.233	0.456	0.1137257E-03	2.648074	0.1341007E-01	-0.7045010
08292011	12	0.001	0.069	0.098	0.000	0.001	0.001	0.004	0.009	0.090	0.001	0.071	303.795	0.419	0.6133318E-04	2.350007	0.9608475E-02	-0.6115853
08292011	13	0.001	0.074	0.098	0.000	0.001	0.001	0.004	0.009	0.087	0.000	0.073	305.109	0.386	0.3468990E-04	2.077390	0.4079392E-02	-0.2930775
08292011	14	0.001	0.072	0.088	0.000	0.001	0.001	0.003	0.008	0.082	0.000	0.077	305.858	0.360	0.1531839E-04	2.034852	0.1498830E-02	0.1327805
08292011	15	0.001	0.066	0.078	0.000	0.001	0.001	0.003	0.008	0.082	0.000	0.078	305.773	0.346	0.1281500E-04	1.977111	0.1304582E-02	0.1805599
08292011	16	0.001	0.059	0.066	0.000	0.001	0.001	0.003	0.007	0.084	0.000	0.074	305.343	0.336	0.1442432E-04	1.789968	0.1841065E-02	-0.1222386E-01
08292011	17	0.001	0.050	0.052	0.000	0.001	0.001	0.003	0.007	0.085	0.000	0.067	304.625	0.327	0.1740456E-04	1.518397	0.4741630E-02	-0.4945424
08292011	18	0.004	0.045	0.041	0.000	0.001	0.001	0.003	0.008	0.086	0.000	0.060	303.803	0.319	0.2211332E-03	1.674765	0.8841207E-02	-0.7225578
08292011	19	0.042	0.057	0.039	0.000	0.001	0.002	0.005	0.018	0.069	0.000	0.057	302.237	0.321	NaN	1.681252	0.8553637E-03	0.2934821
08292011	20	0.081	0.062	0.032	0.000	0.002	0.002	0.007	0.026	0.045	0.000	0.054	300.411	0.342	NaN	1.346700	0.4514850E-04	1.474628
08292011	21	0.072	0.053	0.019	0.000	0.002	0.002	0.007	0.023	0.046	0.001	0.051	299.016	0.373	NaN	1.404603	0.6018615E-04	1.368057
08292011	22	0.054	0.044	0.015	0.001	0.002	0.002	0.006	0.019	0.052	0.001	0.050	298.046	0.406	0.1332057E-01	1.538377	0.1278043E-03	1.080517
08292011	23	0.036	0.032	0.013	0.001	0.002	0.001	0.006	0.017	0.057	0.001	0.050	297.304	0.439	0.1689744E-01	1.742746	0.1502746E-03	1.064349
08292011	24	0.024	0.026	0.012	0.001	0.001	0.001	0.005	0.015	0.061	0.001	0.050	296.642	0.472	0.2146989E-01	2.028531	0.1839375E-03	1.042511
08302011	01	0.021	0.025	0.011	0.001	0.001	0.001	0.005	0.014	0.064	0.001	0.050	296.001	0.506	0.2618933E-01	2.348610	0.2032964E-03	1.062681
08302011	02	0.027	0.030	0.009	0.001	0.001	0.001	0.005	0.014	0.066	0.001	0.051	295.537	0.540	0.3236294E-01	2.637019	0.2064710E-03	1.106254
08302011	03	0.046	0.038	0.009	0.001	0.002	0.001	0.005	0.016	0.067	0.001	0.054	295.386	0.570	0.4067278E-01	2.981310	0.1951318E-03	1.184079
08302011	04	0.062	0.053	0.011	0.001	0.002	0.001	0.006	0.018	0.074	0.002	0.059	295.366	0.603	0.6695867E-01	3.513060	0.1443680E-03	1.386215
08302011	05	0.078	0.076	0.013	0.002	0.002	0.002	0.007	0.020	0.083	0.002	0.066	295.217	0.642	0.1142545	4.541521	0.1117505E-03	1.608952
08302011	06	0.095	0.098	0.013	0.002	0.002	0.003	0.008	0.024	0.084	0.004	0.072	295.026	0.684	0.1719541	5.496375	0.8384432E-04	1.816603
08302011	07	0.100	0.107	0.014	0.002	0.002	0.004	0.009	0.028	0.078	0.005	0.073	295.092	0.725	0.2140011	6.251482	0.6093030E-04	2.011150
08302011	08	0.075	0.095	0.025	0.002	0.002	0.003	0.008	0.026	0.084	0.007	0.073	296.838	0.710	0.1102927	5.980610	0.1105653E-03	1.733127
08302011	09	0.033	0.065	0.042	0.001	0.002	0.002	0.006	0.016	0.097	0.004	0.068	298.880	0.667	0.3621906E-01	5.615834	0.3539068E-03	1.200525
08302011	10	0.005	0.042	0.054	0.000	0.001	0.001	0.004	0.009	0.090	0.001	0.059	300.513	0.629	0.1895571E-01	5.063948	0.6799984E-02	-0.1280187
08302011	11	0.002	0.035	0.058	0.000	0.001	0.001	0.003	0.007	0.079	0.001	0.061	302.071	0.593	0.4023910E-03	3.841334	0.8816713E-02	-0.3608247
08302011	12	0.001	0.036	0.061	0.000	0.001	0.001	0.003	0.007	0.078	0.000	0.062	303.349	0.562	0.2076030E-03	3.408803	0.7336047E-02	-0.3328602
08302011	13	0.001	0.039	0.061	0.000	0.001	0.001	0.003	0.007	0.079	0.000	0.067	304.353	0.536	0.1335144E-03	3.482776	0.4973258E-02	-0.1547154
08302011	14	0.001	0.046	0.058	0.000	0.001	0.001	0.003	0.007	0.080	0.000	0.078	304.792	0.520	0.7104874E-04	3.975670	0.2573746E-02	0.1888448
08302011	15	0.000	0.042	0.055	0.000	0.001	0.001	0.003	0.007	0.080	0.000	0.090	304.582	0.518	0.1990795E-04	4.799154	0.2048276E-02	0.3697761
08302011	16	0.000	0.036	0.052	0.000	0.001	0.001	0.003	0.007	0.081	0.000	0.093	304.013	0.528	0.1591444E-04	5.210987	0.2687611E-02	0.2875536
08302011	17	0.001	0.035	0.047	0.000	0.001	0.001	0.003	0.007	0.087	0.000	0.087	303.145	0.541	0.8141994E-04	4.853364	0.2652497E-02	0.2623879
08302011	18	0.002	0.040	0.039	0.000	0.001	0.001	0.003	0.009	0.103	0.000	0.081	302.113	0.555	0.2567768E-03	4.449052	0.1114149E-01	-0.3986757
08302011	19	0.019	0.050	0.031	0.000	0.002	0.001	0.004	0.014	0.118	0.001	0.077	300.989	0.570	NaN	5.489398	0.9231816E-02	-0.2257625
08302011	20	0.071	0.062	0.025	0.000	0.002	0.002	0.007	0.024	0.097	0.001	0.078	299.724	0.597	NaN	5.549063	0.2381691E-03	1.367334
08302011	21	0.091	0.062	0.028	0.000	0.002	0.002	0.007	0.027	0.093	0.002	0.079	298.876	0.630	NaN	6.106710	0.1447382E-03	1.625224
08302011	22	0.077	0.044	0.025	0.001	0.002	0.002	0.007	0.026	0.095	0.003	0.079	298.373	0.665	0.7462102E-01	5.745760	0.1681856E-03	1.533559
08302011	23	0.049	0.025	0.018	0.001	0.002	0.002	0.007	0.024	0.098	0.002	0.079	298.139	0.679	0.5206352E-01	6.089052	0.2773591E-03	1.341507
08302011	24	0.028	0.017	0.013	0.001	0.002	0.002	0.007	0.021	0.102	0.002	0.076	297.934	0.711	0.4981387E-01	6.699531	0.3289136E-03	1.308963
