# Supplementary material for: Understanding nitrate formation in a world with less sulfate
Source: Copernicus journal article supplement (doi:10.5194/acp-18-12765-2018), 2018-09-05
Supplement: Supplementary file 2 [file acp-18-12765-2018-supplement.zip › DATA/RAW DATA FOR DIURNALS/data_extract_JST_aug_mod2011.csv]

Date	Hour	NH3	SO2	HNO3	CL	NA	MG	K	CA	NH4	NO3	SO4	T	RH	e_NO3	Water	H+	pH
08022011	01	0.109	0.014	0.100	0.000	0.001	0.001	0.001	0.004	0.007	0.004	0.007	298.603	0.846	NaN	15.72418	0.6876850E-03	1.359178
08022011	02	0.101	0.013	0.083	0.000	0.001	0.001	0.001	0.004	0.008	0.005	0.007	298.337	0.864	NaN	14.69455	0.3487834E-03	1.624600
08022011	03	0.098	0.012	0.070	0.000	0.001	0.001	0.002	0.004	0.008	0.005	0.007	298.192	0.870	NaN	13.87674	0.2001349E-03	1.840965
08022011	04	0.100	0.013	0.063	0.000	0.001	0.001	0.002	0.004	0.007	0.004	0.007	298.088	0.873	NaN	12.48949	0.1343769E-03	1.968220
08022011	05	0.114	0.015	0.059	0.000	0.001	0.001	0.002	0.004	0.008	0.005	0.007	298.000	0.875	NaN	13.22213	0.9572463E-04	2.140278
08022011	06	0.142	0.019	0.054	0.001	0.001	0.002	0.002	0.004	0.010	0.008	0.007	297.946	0.879	0.1401694	2.535784	0.2989968E-05	2.928446
08022011	07	0.162	0.022	0.054	0.001	0.001	0.002	0.002	0.004	0.014	0.014	0.008	298.808	0.887	0.2247224	4.536202	0.5879822E-05	2.887328
08022011	08	0.150	0.021	0.084	0.000	0.001	0.003	0.002	0.006	0.012	0.012	0.008	301.167	0.822	NaN	11.37047	0.1108861E-03	2.010901
08022011	09	0.120	0.016	0.113	0.000	0.001	0.002	0.002	0.005	0.006	0.005	0.008	302.240	0.773	NaN	10.15776	0.6830218E-03	1.172363
08022011	10	0.109	0.016	0.127	0.000	0.000	0.001	0.002	0.004	0.006	0.003	0.008	303.491	0.715	NaN	7.447451	0.1686637E-01	-0.3550141
08022011	11	0.084	0.018	0.134	0.000	0.000	0.001	0.001	0.005	0.009	0.002	0.010	303.992	0.687	NaN	5.232603	0.4731708E-01	-0.9563002
08022011	12	0.050	0.015	0.131	0.000	0.000	0.001	0.001	0.003	0.018	0.001	0.012	304.773	0.651	NaN	3.299227	0.7685356E-01	-1.367252
08022011	13	0.039	0.019	0.156	0.000	0.000	0.001	0.001	0.002	0.027	0.001	0.017	306.196	0.605	NaN	2.812148	0.1166654	-1.617904
08022011	14	0.027	0.023	0.159	0.000	0.000	0.001	0.001	0.003	0.034	0.000	0.021	307.381	0.549	NaN	2.159896	0.1301442	-1.779992
08022011	15	0.023	0.017	0.121	0.000	0.000	0.001	0.001	0.005	0.035	0.000	0.023	306.796	0.554	NaN	2.075782	0.9461073E-01	-1.658759
08022011	16	0.044	0.017	0.185	0.000	0.000	0.002	0.001	0.004	0.039	0.001	0.026	306.557	0.554	NaN	2.966673	0.1402953	-1.674774
08022011	17	0.042	0.018	0.215	0.000	0.000	0.002	0.001	0.005	0.042	0.001	0.028	306.728	0.552	NaN	3.012959	0.1718263	-1.756096
08022011	18	0.046	0.018	0.221	0.000	0.001	0.002	0.002	0.010	0.037	0.001	0.031	305.845	0.563	NaN	3.113027	0.1729933	-1.744846
08022011	19	0.037	0.016	0.201	0.000	0.001	0.002	0.002	0.007	0.045	0.001	0.031	304.383	0.571	NaN	3.250106	0.1599198	-1.692005
08022011	20	0.037	0.018	0.162	0.000	0.001	0.001	0.001	0.004	0.049	0.001	0.031	302.438	0.635	NaN	4.197122	0.1247674	-1.473150
08022011	21	0.033	0.019	0.136	0.000	0.000	0.001	0.001	0.002	0.051	0.001	0.029	301.091	0.685	NaN	4.868978	0.1004473	-1.314501
08022011	22	0.029	0.018	0.124	0.000	0.000	0.001	0.001	0.002	0.050	0.001	0.028	300.288	0.707	NaN	4.963206	0.9124438E-01	-1.264444
08022011	23	0.034	0.019	0.113	0.000	0.000	0.001	0.001	0.001	0.048	0.001	0.026	299.625	0.733	NaN	5.582068	0.7371593E-01	-1.120766
08022011	24	0.040	0.019	0.096	0.000	0.000	0.001	0.001	0.001	0.044	0.002	0.024	298.999	0.769	NaN	6.874983	0.4968711E-01	-0.8589721
08032011	01	0.045	0.022	0.077	0.000	0.001	0.001	0.001	0.001	0.040	0.002	0.022	298.394	0.812	NaN	8.813030	0.2351816E-01	-0.4262781
08032011	02	0.050	0.026	0.061	0.000	0.001	0.001	0.001	0.001	0.037	0.003	0.020	297.963	0.841	NaN	11.02264	0.6174431E-02	0.2516886
08032011	03	0.055	0.032	0.051	0.000	0.001	0.001	0.001	0.001	0.034	0.003	0.018	297.729	0.852	NaN	11.45603	0.6445239E-03	1.249795
08032011	04	0.064	0.040	0.045	0.000	0.001	0.001	0.001	0.002	0.033	0.003	0.018	297.566	0.859	NaN	11.41462	0.1847365E-03	1.790909
08032011	05	0.081	0.050	0.043	0.001	0.001	0.001	0.001	0.002	0.034	0.004	0.018	297.425	0.867	0.1134948	5.034653	0.3226977E-04	2.193174
08032011	06	0.107	0.059	0.038	0.001	0.001	0.002	0.001	0.002	0.035	0.007	0.018	297.341	0.880	0.1828274	6.029206	0.2204321E-04	2.436985
08032011	07	0.127	0.063	0.035	0.001	0.001	0.003	0.001	0.002	0.035	0.008	0.019	298.328	0.877	0.1957743	6.357433	0.1958492E-04	2.511360
08032011	08	0.105	0.053	0.059	0.001	0.001	0.003	0.002	0.002	0.033	0.008	0.018	300.432	0.821	0.5882108E-01	3.582287	0.2236643E-04	2.204564
08032011	09	0.070	0.040	0.078	0.000	0.001	0.002	0.002	0.004	0.021	0.003	0.017	301.995	0.769	NaN	7.909957	0.5395625E-02	0.1661324
08032011	10	0.050	0.048	0.085	0.000	0.001	0.001	0.002	0.008	0.014	0.001	0.017	304.642	0.650	NaN	3.208793	0.3091994E-01	-0.9838968
08032011	11	0.005	0.132	0.068	0.000	0.000	0.001	0.001	0.005	0.031	0.000	0.025	306.866	0.553	0.1671731E-02	1.492028	0.5065477E-02	-0.5308433
08032011	12	0.001	0.145	0.065	0.000	0.000	0.000	0.001	0.003	0.028	0.000	0.030	308.303	0.494	0.8642673E-05	1.343856	0.9519506E-03	0.1497385
08032011	13	0.001	0.118	0.056	0.000	0.000	0.000	0.001	0.003	0.032	0.000	0.028	309.630	0.444	0.1394749E-04	0.9790772	0.1749189E-02	-0.2520197
08032011	14	0.003	0.088	0.046	0.000	0.000	0.000	0.001	0.003	0.035	0.000	0.026	310.115	0.431	0.5018711E-04	0.9706491	0.4680291E-02	-0.6832106
08032011	15	0.006	0.069	0.041	0.000	0.001	0.000	0.001	0.003	0.035	0.000	0.024	309.803	0.439	0.3226817E-02	1.238288	0.6397293E-02	-0.7131747
08032011	16	0.006	0.050	0.037	0.000	0.001	0.000	0.001	0.003	0.036	0.000	0.024	309.165	0.453	0.3973961E-02	1.387031	0.6513759E-02	-0.6717455
08032011	17	0.007	0.042	0.036	0.000	0.001	0.000	0.001	0.004	0.039	0.000	0.026	308.346	0.467	0.5416989E-02	1.766681	0.6960727E-02	-0.5954965
08032011	18	0.016	0.038	0.035	0.000	0.001	0.001	0.002	0.006	0.038	0.000	0.026	307.414	0.489	NaN	1.666607	0.1102509E-01	-0.8205491
08032011	19	0.053	0.038	0.047	0.000	0.001	0.001	0.003	0.012	0.026	0.000	0.027	306.010	0.521	NaN	2.155948	0.1782274E-03	1.082664
08032011	20	0.097	0.039	0.044	0.000	0.001	0.002	0.005	0.020	0.005	0.001	0.026	304.304	0.559	NaN	1.812042	0.7800063E-05	2.366070
08032011	21	0.106	0.040	0.032	0.000	0.001	0.002	0.005	0.022	0.000	0.001	0.022	303.076	0.594	NaN	1.113548	0.5581670E-05	2.299945
08032011	22	0.100	0.042	0.022	0.000	0.001	0.002	0.005	0.021	0.000	0.001	0.017	302.146	0.629	NaN	0.9321070	0.4918923E-05	2.277596
08032011	23	0.091	0.043	0.016	0.000	0.001	0.001	0.004	0.018	0.000	0.001	0.014	301.403	0.669	NaN	0.8298283	0.5117782E-05	2.209907
08032011	24	0.082	0.045	0.014	0.000	0.001	0.001	0.004	0.016	0.000	0.000	0.013	300.984	0.690	NaN	0.7519993	0.5292145E-05	2.152586
08042011	01	0.074	0.044	0.013	0.000	0.001	0.001	0.004	0.015	0.000	0.000	0.013	300.272	0.739	NaN	0.9015818	0.8205829E-05	2.040883
08042011	02	0.070	0.040	0.013	0.000	0.001	0.001	0.004	0.014	0.000	0.000	0.014	299.841	0.769	NaN	1.069033	0.1125481E-04	1.977653
08042011	03	0.068	0.039	0.013	0.000	0.001	0.001	0.004	0.014	0.000	0.001	0.014	299.469	0.793	NaN	1.303355	0.1499998E-04	1.938972
08042011	04	0.072	0.042	0.013	0.000	0.001	0.001	0.004	0.015	0.000	0.000	0.015	299.237	0.805	NaN	1.384302	0.1525056E-04	1.957945
08042011	05	0.086	0.049	0.014	0.000	0.001	0.001	0.005	0.018	0.000	0.000	0.016	298.998	0.820	NaN	1.602171	0.1304466E-04	2.089276
08042011	06	0.111	0.061	0.010	0.002	0.002	0.002	0.006	0.022	0.001	0.005	0.016	298.733	0.837	0.000000	0.1828188E-08	0.1000357E-13	2.261866
08042011	07	0.122	0.071	0.000	0.006	0.002	0.003	0.007	0.027	0.001	0.019	0.016	299.075	0.845	NaN	4.531224	0.4334123E-09	7.019314
08042011	08	0.085	0.072	0.000	0.007	0.002	0.003	0.007	0.026	0.007	0.038	0.015	300.294	0.815	NaN	6.784178	0.1178134E-04	2.760302
08042011	09	0.052	0.080	0.033	0.001	0.002	0.002	0.004	0.015	0.003	0.005	0.011	301.468	0.772	0.5348027E-01	0.2181783	0.7308498E-07	3.474983
08042011	10	0.044	0.094	0.044	0.000	0.002	0.001	0.003	0.011	0.000	0.000	0.011	302.672	0.733	NaN	2.804280	0.1374946E-02	0.3095357
08042011	11	0.042	0.114	0.047	0.000	0.001	0.001	0.002	0.008	0.002	0.001	0.011	303.435	0.710	NaN	2.940252	0.3901607E-02	-0.1228589
08042011	12	0.040	0.101	0.047	0.000	0.001	0.001	0.002	0.008	0.004	0.000	0.012	303.855	0.698	NaN	2.811719	0.4379352E-02	-0.1924380
08042011	13	0.033	0.073	0.035	0.000	0.001	0.001	0.002	0.007	0.006	0.000	0.011	304.108	0.692	NaN	2.320670	0.5031622E-03	0.6639054
08042011	14	0.027	0.053	0.027	0.000	0.001	0.001	0.002	0.006	0.010	0.000	0.013	303.850	0.699	NaN	2.306023	0.5536669E-03	0.6196151
08042011	15	0.024	0.043	0.027	0.000	0.001	0.001	0.002	0.006	0.019	0.000	0.017	302.768	0.718	NaN	2.926173	0.1170743E-02	0.3978384
08042011	16	0.027	0.038	0.031	0.000	0.001	0.001	0.002	0.007	0.028	0.000	0.022	301.315	0.751	NaN	4.165663	0.1339761E-02	0.4926568
08042011	17	0.039	0.038	0.034	0.000	0.001	0.001	0.003	0.010	0.029	0.001	0.026	300.321	0.779	NaN	5.510091	0.3841089E-03	1.156704
08042011	18	0.041	0.040	0.029	0.000	0.001	0.001	0.003	0.013	0.035	0.001	0.033	299.678	0.801	NaN	6.355687	0.2970879E-03	1.330277
08042011	19	0.033	0.039	0.024	0.000	0.001	0.001	0.004	0.015	0.049	0.001	0.041	299.160	0.817	NaN	7.657862	0.3733620E-03	1.311978
08042011	20	0.024	0.020	0.016	0.001	0.001	0.001	0.003	0.013	0.052	0.001	0.041	297.857	0.877	0.5226696E-01	7.751585	0.1932154E-03	1.603349
08042011	21	0.021	0.011	0.011	0.001	0.001	0.001	0.003	0.010	0.049	0.001	0.036	297.117	0.917	0.8829898E-01	10.70219	0.1623543E-03	1.819009
08042011	22	0.012	0.012	0.009	0.001	0.001	0.001	0.002	0.007	0.059	0.002	0.039	296.802	0.932	0.9519005E-01	14.87185	0.2898818E-03	1.710144
08042011	23	0.011	0.014	0.007	0.001	0.001	0.001	0.002	0.007	0.065	0.002	0.041	296.645	0.930	0.1113292	15.80642	0.2812849E-03	1.749687
08042011	24	0.013	0.016	0.007	0.001	0.001	0.001	0.003	0.007	0.064	0.002	0.041	296.477	0.936	0.1249218	18.45773	0.3044807E-03	1.782619
08052011	01	0.015	0.017	0.007	0.001	0.001	0.001	0.003	0.007	0.062	0.002	0.040	296.426	0.922	0.9922546E-01	13.40503	0.2596972E-03	1.712800
08052011	02	0.018	0.018	0.007	0.001	0.001	0.001	0.003	0.008	0.055	0.001	0.038	296.270	0.925	0.1141710	13.98208	0.2197480E-03	1.803647
08052011	03	0.024	0.019	0.007	0.001	0.001	0.001	0.003	0.008	0.049	0.002	0.035	296.168	0.931	0.1359431	12.79945	0.1496240E-03	1.932190
08052011	04	0.035	0.020	0.007	0.001	0.002	0.001	0.003	0.009	0.042	0.002	0.032	296.152	0.932	0.1781564	11.18186	0.8034270E-04	2.143568
08052011	05	0.053	0.022	0.007	0.001	0.002	0.002	0.003	0.009	0.035	0.003	0.029	296.155	0.933	0.2380560	10.07540	0.4222403E-04	2.377703
08052011	06	0.083	0.025	0.007	0.001	0.002	0.002	0.004	0.010	0.027	0.004	0.026	296.212	0.933	0.3088604	8.642184	0.1966737E-04	2.642877
08052011	07	0.112	0.028	0.009	0.002	0.002	0.003	0.004	0.011	0.020	0.006	0.024	297.126	0.925	0.3402886	7.948736	0.1106047E-04	2.856525
08052011	08	0.100	0.026	0.026	0.001	0.002	0.003	0.005	0.014	0.012	0.009	0.021	298.905	0.872	0.1510743	2.753920	0.2698183E-05	3.008880
08052011	09	0.064	0.021	0.047	0.000	0.001	0.003	0.004	0.015	0.003	0.003	0.018	300.398	0.809	NaN	5.834208	0.1457406E-03	1.602401
08052011	10	0.045	0.020	0.072	0.000	0.001	0.002	0.004	0.012	0.002	0.002	0.016	302.635	0.713	NaN	3.324312	0.2472100E-01	-0.8713643
08052011	11	0.032	0.029	0.093	0.000	0.001	0.001	0.003	0.009	0.006	0.000	0.014	304.826	0.628	NaN	1.873062	0.5809204E-01	-1.491564
08052011	12	0.020	0.047	0.090	0.000	0.001	0.001	0.002	0.007	0.012	0.000	0.015	306.219	0.582	NaN	1.363362	0.6844436E-01	-1.700727
08052011	13	0.015	0.053	0.078	0.000	0.001	0.001	0.002	0.007	0.016	0.000	0.016	307.601	0.537	NaN	1.164236	0.5919670E-01	-1.706256
08052011	14	0.016	0.050	0.070	0.000	0.000	0.001	0.002	0.006	0.018	0.000	0.017	307.539	0.518	NaN	1.151093	0.5284001E-01	-1.661852
08052011	15	0.014	0.032	0.054	0.000	0.000	0.001	0.001	0.005	0.020	0.000	0.017	308.049	0.517	NaN	1.168681	0.3907361E-01	-1.524188
08052011	16	0.011	0.023	0.049	0.000	0.000	0.001	0.001	0.005	0.024	0.000	0.018	307.710	0.523	NaN	1.212364	0.3471676E-01	-1.456906
08052011	17	0.016	0.018	0.049	0.000	0.000	0.001	0.001	0.005	0.024	0.000	0.019	306.649	0.545	NaN	1.497557	0.3099763E-01	-1.315945
08052011	18	0.037	0.015	0.056	0.000	0.001	0.001	0.002	0.010	0.014	0.000	0.019	305.701	0.575	NaN	1.912200	0.1409612E-01	-0.8675663
08052011	19	0.049	0.010	0.054	0.000	0.001	0.002	0.003	0.012	0.006	0.000	0.018	302.725	0.660	NaN	3.057323	0.1883531E-02	0.2103684
08052011	20	0.059	0.010	0.038	0.000	0.001	0.002	0.003	0.012	0.002	0.001	0.016	301.269	0.702	NaN	2.763544	0.3688881E-04	1.874572
08052011	21	0.064	0.012	0.031	0.000	0.001	0.001	0.002	0.007	0.010	0.001	0.015	300.369	0.697	NaN	2.785855	0.3776819E-04	1.867832
08052011	22	0.083	0.014	0.030	0.000	0.001	0.001	0.002	0.006	0.011	0.001	0.014	299.583	0.720	NaN	2.982649	0.2300018E-04	2.112871
08052011	23	0.103	0.016	0.027	0.000	0.001	0.001	0.003	0.008	0.006	0.001	0.013	298.844	0.754	NaN	2.786001	0.1012915E-04	2.439408
08052011	24	0.117	0.016	0.021	0.001	0.001	0.002	0.003	0.009	0.002	0.002	0.012	298.237	0.784	0.5428797E-01	0.6185819	0.3754904E-06	3.216798
08062011	01	0.124	0.016	0.018	0.001	0.001	0.002	0.004	0.010	0.001	0.001	0.011	297.665	0.815	0.2260756E-01	0.2189118	0.8529034E-07	3.409369
08062011	02	0.127	0.016	0.015	0.000	0.001	0.002	0.004	0.010	0.001	0.001	0.011	297.272	0.837	NaN	2.328580	0.6621721E-05	2.546120
08062011	03	0.127	0.016	0.014	0.001	0.001	0.002	0.004	0.010	0.001	0.001	0.010	297.059	0.854	0.000000	0.2290196E-08	0.2040622E-18	7.050110
08062011	04	0.126	0.015	0.012	0.001	0.001	0.002	0.004	0.009	0.001	0.001	0.009	296.922	0.869	0.000000	0.2264181E-08	0.1000227E-13	2.354813
08062011	05	0.128	0.016	0.011	0.001	0.001	0.002	0.004	0.009	0.001	0.001	0.009	296.839	0.881	0.000000	0.2320039E-08	0.2082043E-18	7.047006
08062011	06	0.131	0.017	0.012	0.001	0.001	0.002	0.004	0.008	0.001	0.001	0.009	296.830	0.892	0.5434036E-01	0.4396518	0.1904553E-06	3.363316
08062011	07	0.134	0.020	0.015	0.001	0.001	0.002	0.004	0.008	0.002	0.002	0.010	297.804	0.884	0.7708281E-01	0.7725728	0.3413136E-06	3.354786
08062011	08	0.114	0.020	0.031	0.001	0.001	0.002	0.004	0.008	0.004	0.004	0.011	299.493	0.849	0.5447167E-01	0.9360633	0.7115271E-06	3.119114
08062011	09	0.069	0.015	0.040	0.000	0.001	0.001	0.003	0.005	0.011	0.003	0.013	300.522	0.828	NaN	6.891378	0.1026938E-03	1.826762
08062011	10	0.042	0.010	0.037	0.000	0.000	0.001	0.002	0.003	0.017	0.001	0.012	301.379	0.802	NaN	5.257802	0.3274734E-03	1.205628
08062011	11	0.025	0.007	0.038	0.000	0.000	0.000	0.001	0.002	0.022	0.001	0.014	302.304	0.770	NaN	3.743951	0.1053622E-01	-0.4493549
08062011	12	0.018	0.008	0.043	0.000	0.000	0.000	0.001	0.002	0.027	0.000	0.016	303.336	0.744	NaN	3.105084	0.2023008E-01	-0.8139244
08062011	13	0.013	0.008	0.048	0.000	0.000	0.001	0.001	0.002	0.032	0.000	0.019	304.273	0.715	NaN	3.036929	0.2877039E-01	-0.9765112
08062011	14	0.006	0.007	0.046	0.000	0.000	0.001	0.001	0.003	0.034	0.000	0.022	305.674	0.661	NaN	2.226473	0.3725703E-01	-1.223591
08062011	15	0.007	0.007	0.040	0.000	0.000	0.001	0.001	0.004	0.032	0.000	0.022	303.762	0.679	NaN	2.318401	0.3021207E-01	-1.114992
08062011	16	0.025	0.009	0.057	0.000	0.000	0.001	0.002	0.007	0.025	0.000	0.021	302.875	0.732	NaN	3.549683	0.2564194E-01	-0.8587614
08062011	17	0.021	0.010	0.052	0.000	0.000	0.001	0.002	0.006	0.024	0.000	0.020	302.055	0.765	NaN	3.858568	0.2552235E-01	-0.8204945
08062011	18	0.037	0.014	0.069	0.000	0.001	0.001	0.002	0.009	0.018	0.001	0.020	301.138	0.799	NaN	5.696268	0.2645735E-01	-0.6669559
08062011	19	0.033	0.015	0.063	0.000	0.001	0.001	0.002	0.010	0.016	0.001	0.020	300.129	0.836	NaN	6.666667	0.2451918E-01	-0.5655973
08062011	20	0.032	0.016	0.054	0.000	0.001	0.001	0.003	0.010	0.016	0.001	0.019	299.258	0.869	NaN	8.558413	0.1400261E-01	-0.2138158
08062011	21	0.032	0.017	0.050	0.000	0.001	0.001	0.003	0.010	0.016	0.002	0.020	298.434	0.897	NaN	11.46518	0.1251006E-01	-0.3787859E-01
08062011	22	0.024	0.018	0.048	0.000	0.001	0.001	0.002	0.009	0.022	0.002	0.021	297.848	0.918	NaN	13.39221	0.1593328E-01	-0.7545291E-01
08062011	23	0.024	0.019	0.042	0.000	0.001	0.001	0.002	0.009	0.026	0.003	0.023	297.488	0.929	NaN	16.41541	0.1083127E-01	0.1805724
08062011	24	0.025	0.019	0.037	0.000	0.001	0.001	0.002	0.009	0.027	0.003	0.023	297.246	0.939	NaN	20.11768	0.5836040E-02	0.5374597
08072011	01	0.024	0.020	0.031	0.000	0.001	0.001	0.002	0.009	0.027	0.004	0.023	297.068	0.949	NaN	23.78493	0.3633587E-02	0.8159664
08072011	02	0.027	0.019	0.025	0.000	0.001	0.001	0.002	0.009	0.024	0.004	0.021	296.973	0.953	NaN	22.59092	0.7679891E-03	1.468579
08072011	03	0.031	0.020	0.022	0.001	0.001	0.001	0.002	0.009	0.018	0.003	0.018	296.937	0.952	0.1300778	7.542519	0.3509769E-04	2.332238
08072011	04	0.036	0.021	0.021	0.001	0.001	0.001	0.002	0.009	0.013	0.003	0.016	296.926	0.948	0.1293687	6.165237	0.2287040E-04	2.430676
08072011	05	0.043	0.023	0.021	0.001	0.001	0.001	0.003	0.010	0.010	0.004	0.015	296.926	0.945	0.1654123	5.451747	0.1233022E-04	2.645565
08072011	06	0.053	0.027	0.021	0.001	0.001	0.001	0.003	0.012	0.005	0.004	0.015	296.961	0.944	0.1572868	3.327906	0.4561005E-05	2.863111
08072011	07	0.063	0.032	0.024	0.000	0.001	0.002	0.004	0.014	0.002	0.002	0.015	297.994	0.925	NaN	10.17407	0.9254127E-04	2.041159
08072011	08	0.057	0.030	0.027	0.000	0.001	0.002	0.005	0.016	0.001	0.001	0.016	300.303	0.853	NaN	4.065449	0.1110229E-03	1.563696
08072011	09	0.032	0.048	0.029	0.000	0.001	0.001	0.003	0.010	0.010	0.001	0.017	301.938	0.800	NaN	4.106570	0.3803594E-03	1.033285
08072011	10	0.013	0.080	0.032	0.000	0.001	0.001	0.002	0.006	0.024	0.000	0.019	303.096	0.756	NaN	3.148514	0.1114764E-01	-0.5490773
08072011	11	0.006	0.052	0.031	0.000	0.000	0.001	0.002	0.005	0.029	0.000	0.021	303.285	0.731	NaN	2.553710	0.1931826E-01	-0.8787964
08072011	12	0.003	0.024	0.029	0.000	0.000	0.001	0.001	0.004	0.031	0.000	0.024	304.030	0.718	0.2124786E-02	2.458228	0.4451463E-02	-0.2578806
08072011	13	0.003	0.016	0.029	0.000	0.000	0.001	0.001	0.004	0.030	0.000	0.023	305.060	0.700	0.2450228E-02	2.206581	0.4538675E-02	-0.3132091
08072011	14	0.004	0.012	0.027	0.000	0.000	0.001	0.001	0.004	0.027	0.000	0.020	305.388	0.689	0.8845747E-02	2.306590	0.4948684E-02	-0.3315193
08072011	15	0.005	0.010	0.026	0.000	0.000	0.001	0.001	0.004	0.025	0.000	0.018	305.386	0.682	NaN	1.825143	0.1720254E-01	-0.9742957
08072011	16	0.005	0.010	0.023	0.000	0.000	0.001	0.001	0.004	0.023	0.000	0.016	305.301	0.677	NaN	1.706437	0.1239066E-01	-0.8610042
08072011	17	0.006	0.007	0.016	0.000	0.000	0.000	0.001	0.003	0.017	0.000	0.012	304.749	0.676	NaN	1.259081	0.7733598E-02	-0.7883278
08072011	18	0.016	0.006	0.013	0.000	0.000	0.001	0.001	0.004	0.011	0.000	0.011	304.301	0.667	NaN	1.374720	0.3267518E-03	0.6239961
08072011	19	0.036	0.012	0.018	0.000	0.001	0.001	0.002	0.009	0.004	0.000	0.012	303.424	0.673	NaN	1.243783	0.1976190E-04	1.798916
08072011	20	0.050	0.020	0.017	0.000	0.001	0.002	0.004	0.014	0.000	0.000	0.015	302.337	0.698	NaN	1.046331	0.1077830E-04	1.987119
08072011	21	0.048	0.024	0.011	0.001	0.001	0.002	0.003	0.012	0.001	0.000	0.015	301.480	0.725	0.2485180E-01	0.4474046	0.2613391E-06	3.233496
08072011	22	0.043	0.030	0.009	0.001	0.001	0.001	0.003	0.010	0.003	0.000	0.014	301.074	0.718	0.5795717E-02	0.5413787	0.3064204E-05	2.247184
08072011	23	0.040	0.032	0.008	0.001	0.001	0.001	0.003	0.009	0.003	0.000	0.013	300.484	0.749	0.7224917E-02	0.5988379	0.3222539E-05	2.269111
08072011	24	0.036	0.031	0.008	0.001	0.001	0.001	0.003	0.010	0.001	0.000	0.013	299.886	0.788	0.3543103E-01	0.5530159	0.3620504E-06	3.183969
08082011	01	0.033	0.031	0.008	0.001	0.001	0.001	0.003	0.010	0.002	0.000	0.013	299.428	0.814	0.3882194E-01	0.6016292	0.4196456E-06	3.156446
08082011	02	0.034	0.032	0.008	0.001	0.001	0.001	0.003	0.011	0.002	0.000	0.014	299.035	0.831	0.4452759E-01	0.6637814	0.4710803E-06	3.148930
08082011	03	0.038	0.036	0.009	0.001	0.001	0.001	0.003	0.012	0.003	0.000	0.016	298.706	0.837	0.2007812E-01	0.8795892	0.3179101E-05	2.441976
08082011	04	0.046	0.043	0.009	0.001	0.001	0.001	0.003	0.013	0.001	0.001	0.017	298.413	0.837	0.2293664E-01	0.8866069	0.2812252E-05	2.498677
08082011	05	0.062	0.052	0.011	0.001	0.001	0.001	0.004	0.016	0.001	0.001	0.017	298.142	0.835	0.1815444E-01	0.2198599	0.1009512E-06	3.338035
08082011	06	0.087	0.061	0.012	0.001	0.002	0.002	0.005	0.019	0.000	0.001	0.018	297.876	0.835	0.000000	0.1453699E-08	0.1000340E-13	2.162327
08082011	07	0.097	0.065	0.013	0.001	0.002	0.003	0.006	0.023	0.001	0.001	0.019	298.365	0.814	0.000000	0.1739293E-08	0.1577051E-18	7.042527
08082011	08	0.071	0.053	0.024	0.001	0.002	0.003	0.005	0.020	0.002	0.001	0.020	300.119	0.759	0.000000	0.1232851E-08	0.1161847E-18	7.025762
08082011	09	0.037	0.037	0.027	0.000	0.001	0.001	0.003	0.010	0.010	0.001	0.018	302.116	0.709	NaN	2.640020	0.1355672E-03	1.289453
08082011	10	0.017	0.041	0.028	0.000	0.001	0.001	0.001	0.005	0.017	0.000	0.015	304.176	0.653	NaN	1.846990	0.6822112E-02	-0.5674543
08082011	11	0.011	0.041	0.029	0.000	0.000	0.000	0.001	0.004	0.019	0.000	0.014	305.711	0.612	NaN	1.265172	0.1549487E-01	-1.088038
08082011	12	0.010	0.030	0.023	0.000	0.000	0.000	0.001	0.003	0.018	0.000	0.012	306.890	0.583	NaN	1.054582	0.9499352E-02	-0.9546134
08082011	13	0.013	0.031	0.020	0.000	0.000	0.000	0.001	0.003	0.014	0.000	0.011	307.860	0.557	NaN	0.9317467	0.5707127E-02	-0.7871196
08082011	14	0.016	0.034	0.020	0.000	0.000	0.000	0.001	0.003	0.012	0.000	0.009	308.048	0.543	NaN	0.8481386	0.1801401E-02	-0.3271435
08082011	15	0.019	0.038	0.020	0.000	0.000	0.000	0.001	0.003	0.010	0.000	0.009	307.234	0.556	NaN	0.9404756	0.1309640E-02	-0.1438044
08082011	16	0.021	0.039	0.020	0.000	0.000	0.000	0.001	0.003	0.009	0.000	0.008	306.007	0.595	NaN	1.076658	0.4051303E-03	0.4244832
08082011	17	0.024	0.042	0.020	0.000	0.000	0.000	0.001	0.004	0.008	0.000	0.009	304.419	0.649	NaN	1.338632	0.2516522E-03	0.7258604
08082011	18	0.027	0.040	0.018	0.000	0.000	0.000	0.001	0.005	0.007	0.000	0.010	302.795	0.703	NaN	1.564160	0.1351895E-03	1.063338
08082011	19	0.040	0.046	0.020	0.000	0.001	0.001	0.002	0.009	0.004	0.000	0.012	301.155	0.752	NaN	1.928564	0.2771310E-04	1.842549
08082011	20	0.050	0.051	0.018	0.000	0.001	0.001	0.003	0.012	0.001	0.001	0.014	299.961	0.787	NaN	2.077577	0.2106861E-04	1.993921
08082011	21	0.057	0.055	0.017	0.000	0.001	0.001	0.004	0.016	0.000	0.001	0.015	299.165	0.809	NaN	1.915607	0.3160234E-04	1.782587
08082011	22	0.060	0.058	0.016	0.000	0.001	0.002	0.005	0.021	0.001	0.001	0.016	298.574	0.829	NaN	2.097798	0.2881681E-04	1.862118
08082011	23	0.056	0.058	0.012	0.001	0.001	0.001	0.005	0.021	0.001	0.001	0.015	298.121	0.842	0.000000	0.9239421E-09	0.8520429E-19	7.035183
08082011	24	0.050	0.052	0.009	0.001	0.001	0.001	0.004	0.019	0.001	0.001	0.014	297.752	0.853	0.000000	0.8475293E-09	0.7749043E-19	7.038907
08092011	01	0.042	0.045	0.008	0.001	0.001	0.001	0.004	0.017	0.001	0.001	0.012	297.429	0.861	0.000000	0.7293994E-09	0.1000174E-13	1.862890
08092011	02	0.033	0.043	0.008	0.001	0.001	0.001	0.004	0.015	0.000	0.001	0.011	297.130	0.871	0.000000	0.5739490E-09	0.5178710E-19	7.044652
08092011	03	0.028	0.043	0.008	0.001	0.001	0.001	0.003	0.014	0.000	0.000	0.011	296.938	0.877	0.000000	0.5011359E-09	0.4504091E-19	7.046349
08092011	04	0.028	0.044	0.010	0.001	0.001	0.001	0.003	0.014	0.000	0.000	0.011	296.840	0.882	0.000000	0.5058634E-09	0.4542453E-19	7.046743
08092011	05	0.038	0.044	0.013	0.000	0.001	0.001	0.004	0.016	0.000	0.000	0.012	296.791	0.887	NaN	2.806606	0.6154502E-04	1.658989
08092011	06	0.059	0.046	0.015	0.000	0.001	0.002	0.005	0.020	0.000	0.001	0.015	296.765	0.889	NaN	3.461143	0.4412731E-04	1.894512
08092011	07	0.072	0.048	0.017	0.001	0.002	0.003	0.006	0.024	0.001	0.002	0.017	297.494	0.870	0.1115985	0.4411004	0.2789842E-06	3.198958
08092011	08	0.054	0.048	0.031	0.001	0.002	0.003	0.005	0.022	0.001	0.002	0.017	299.338	0.809	0.000000	0.8390647E-09	0.1000087E-13	1.923758
08092011	09	0.034	0.060	0.029	0.000	0.001	0.001	0.003	0.010	0.002	0.001	0.013	301.055	0.758	NaN	2.771582	0.1534700E-03	1.256704
08092011	10	0.027	0.067	0.022	0.000	0.001	0.001	0.001	0.005	0.006	0.000	0.010	302.546	0.717	NaN	2.030730	0.1818618E-03	1.047911
08092011	11	0.020	0.054	0.021	0.000	0.001	0.000	0.001	0.004	0.010	0.000	0.010	303.880	0.671	NaN	1.552557	0.1041790E-02	0.1732673
08092011	12	0.014	0.033	0.023	0.000	0.001	0.000	0.001	0.005	0.012	0.000	0.012	302.897	0.679	NaN	1.473550	0.6832936E-02	-0.6662425
08092011	13	0.021	0.025	0.036	0.000	0.001	0.001	0.002	0.008	0.008	0.000	0.013	303.958	0.672	NaN	1.746536	0.9547929E-02	-0.7377316
08092011	14	0.012	0.027	0.031	0.000	0.000	0.001	0.001	0.005	0.012	0.000	0.012	305.936	0.610	NaN	1.142117	0.1565766E-01	-1.137016
08092011	15	0.009	0.026	0.020	0.000	0.000	0.000	0.001	0.003	0.011	0.000	0.010	305.377	0.590	NaN	0.7949142	0.1147661E-01	-1.159493
08092011	16	0.013	0.026	0.019	0.000	0.000	0.000	0.001	0.003	0.008	0.000	0.008	304.719	0.593	NaN	0.7952937	0.5448488E-02	-0.8357484
08092011	17	0.016	0.028	0.019	0.000	0.000	0.000	0.001	0.004	0.006	0.000	0.007	303.758	0.621	NaN	0.8966589	0.1387081E-02	-0.1894746
08092011	18	0.026	0.030	0.019	0.000	0.000	0.001	0.001	0.006	0.001	0.000	0.008	302.587	0.652	NaN	1.086311	0.4741005E-04	1.360084
08092011	19	0.036	0.032	0.023	0.000	0.000	0.001	0.002	0.011	0.000	0.000	0.008	301.563	0.672	NaN	1.121097	0.3992658E-04	1.448381
08092011	20	0.051	0.036	0.003	0.005	0.001	0.002	0.004	0.020	0.000	0.022	0.009	300.550	0.705	NaN	3.297212	0.3042737E-09	7.034883
08092011	21	0.056	0.033	0.001	0.006	0.001	0.002	0.005	0.022	0.000	0.025	0.011	299.769	0.728	NaN	3.747702	0.3415525E-09	7.040308
08092011	22	0.051	0.025	0.006	0.004	0.001	0.001	0.004	0.018	0.000	0.013	0.011	299.121	0.752	NaN	2.645090	0.3083421E-05	2.933408
08092011	23	0.044	0.018	0.011	0.001	0.001	0.001	0.003	0.013	0.000	0.000	0.010	298.518	0.781	0.000000	0.8796063E-09	0.7812223E-19	7.051514
08092011	24	0.039	0.014	0.007	0.001	0.001	0.001	0.002	0.010	0.000	0.000	0.010	298.356	0.773	0.000000	0.8180003E-09	0.1000124E-13	1.912700
08102011	01	0.034	0.014	0.005	0.001	0.001	0.001	0.002	0.008	0.000	0.000	0.009	297.784	0.805	0.1610500E-01	0.1686943	0.6513417E-07	3.413291
08102011	02	0.031	0.015	0.004	0.001	0.001	0.001	0.002	0.007	0.001	0.000	0.009	297.361	0.821	0.4383194E-01	0.4152357	0.2807482E-06	3.169978
08102011	03	0.029	0.016	0.004	0.001	0.001	0.001	0.002	0.007	0.001	0.000	0.010	296.940	0.840	0.2150869E-01	0.6685119	0.1922482E-05	2.541247
08102011	04	0.031	0.018	0.005	0.001	0.001	0.001	0.002	0.009	0.000	0.000	0.010	296.602	0.854	0.2187639E-01	0.2200144	0.1046711E-06	3.322624
08102011	05	0.038	0.021	0.007	0.001	0.002	0.001	0.003	0.011	0.000	0.000	0.010	296.272	0.867	0.000000	0.7387021E-09	0.1000010E-13	1.868465
08102011	06	0.052	0.025	0.005	0.001	0.002	0.002	0.004	0.014	0.000	0.003	0.010	295.919	0.884	NaN	1.839666	0.1596219E-09	7.061646
08102011	07	0.059	0.028	0.000	0.003	0.002	0.003	0.004	0.018	0.000	0.013	0.010	296.250	0.885	NaN	3.618761	0.3182068E-09	7.055851
08102011	08	0.039	0.026	0.003	0.003	0.002	0.002	0.004	0.016	0.009	0.027	0.010	298.058	0.830	NaN	4.862489	0.2814077E-04	2.237523
08102011	09	0.033	0.020	0.034	0.000	0.001	0.001	0.002	0.009	0.001	0.001	0.009	300.150	0.743	NaN	2.311917	0.1685277E-02	0.1373010
08102011	10	0.023	0.023	0.040	0.000	0.001	0.001	0.001	0.005	0.006	0.000	0.010	302.006	0.666	NaN	1.716896	0.1493521E-01	-0.9394673
08102011	11	0.018	0.031	0.043	0.000	0.001	0.000	0.001	0.004	0.011	0.000	0.011	303.743	0.601	NaN	1.197298	0.2468919E-01	-1.314304
08102011	12	0.016	0.035	0.040	0.000	0.000	0.000	0.001	0.004	0.014	0.000	0.012	305.163	0.553	NaN	0.9910537	0.2361183E-01	-1.377033
08102011	13	0.015	0.038	0.037	0.000	0.000	0.000	0.001	0.004	0.017	0.000	0.014	306.316	0.518	NaN	0.9729521	0.2219789E-01	-1.358220
08102011	14	0.016	0.039	0.032	0.000	0.000	0.000	0.001	0.004	0.019	0.000	0.014	307.069	0.486	NaN	0.9334775	0.1342034E-01	-1.157660
08102011	15	0.022	0.034	0.027	0.000	0.000	0.000	0.001	0.003	0.016	0.000	0.012	306.942	0.474	NaN	0.8945162	0.3803134E-02	-0.6285535
08102011	16	0.027	0.029	0.022	0.000	0.000	0.000	0.001	0.003	0.013	0.000	0.011	306.356	0.475	NaN	0.8838778	0.2353420E-03	0.5746928
08102011	17	0.030	0.028	0.020	0.000	0.000	0.000	0.001	0.003	0.011	0.000	0.010	305.558	0.485	NaN	0.8257546	0.8521962E-04	0.9863114
08102011	18	0.044	0.031	0.024	0.000	0.000	0.001	0.002	0.006	0.005	0.000	0.010	304.571	0.504	NaN	0.7939433	0.9762400E-05	1.910233
08102011	19	0.061	0.037	0.025	0.002	0.001	0.001	0.003	0.015	0.007	0.014	0.012	303.075	0.534	0.000000	0.2720010E-08	0.2394347E-18	7.055383
08102011	20	0.070	0.042	0.000	0.007	0.001	0.002	0.006	0.026	0.020	0.051	0.013	301.670	0.562	NaN	3.366762	0.1054038E-04	2.504356
08102011	21	0.079	0.041	0.001	0.007	0.001	0.002	0.006	0.026	0.018	0.047	0.013	300.625	0.586	NaN	3.567321	0.8464999E-05	2.624715
08102011	22	0.084	0.038	0.002	0.006	0.001	0.002	0.005	0.024	0.016	0.041	0.013	299.767	0.609	NaN	3.345917	0.7486296E-05	2.650248
08102011	23	0.086	0.033	0.002	0.006	0.001	0.002	0.005	0.021	0.014	0.033	0.012	298.991	0.639	NaN	3.152844	0.5311847E-05	2.773457
08102011	24	0.086	0.028	0.001	0.006	0.001	0.001	0.004	0.019	0.011	0.028	0.012	298.269	0.678	0.3484547E-01	0.7580888E-01	0.1290455E-07	3.768977
08112011	01	0.090	0.024	0.020	0.001	0.001	0.001	0.004	0.017	0.001	0.003	0.012	297.703	0.722	0.000000	0.2492105E-08	0.1000002E-13	2.396565
08112011	02	0.083	0.021	0.016	0.000	0.001	0.001	0.004	0.016	0.000	0.001	0.011	297.388	0.750	NaN	1.269661	0.7385279E-05	2.235321
08112011	03	0.078	0.021	0.012	0.000	0.001	0.001	0.004	0.015	0.000	0.001	0.011	297.246	0.764	NaN	1.008029	0.6506901E-05	2.190099
08112011	04	0.081	0.024	0.011	0.000	0.001	0.001	0.004	0.015	0.000	0.000	0.011	297.167	0.770	NaN	0.9048875	0.5617040E-05	2.207087
08112011	05	0.094	0.027	0.011	0.000	0.001	0.001	0.004	0.014	0.000	0.000	0.011	297.113	0.773	NaN	0.9049622	0.4709296E-05	2.283674
08112011	06	0.119	0.033	0.003	0.003	0.001	0.002	0.005	0.019	0.000	0.009	0.012	297.053	0.781	NaN	2.012119	0.1714119E-09	7.069613
08112011	07	0.147	0.039	0.000	0.005	0.001	0.003	0.006	0.026	0.000	0.018	0.013	297.659	0.800	NaN	3.334796	0.2942392E-09	7.054369
08112011	08	0.136	0.042	0.000	0.007	0.002	0.004	0.008	0.033	0.004	0.048	0.013	300.182	0.721	NaN	6.230913	0.5736514E-09	7.035903
08112011	09	0.083	0.041	0.029	0.004	0.001	0.002	0.005	0.021	0.018	0.035	0.013	301.912	0.652	NaN	4.178797	0.2798864E-04	2.174070
08112011	10	0.064	0.076	0.053	0.000	0.001	0.001	0.003	0.010	0.004	0.001	0.013	303.564	0.599	NaN	2.183253	0.4273159E-04	1.708355
08112011	11	0.034	0.077	0.049	0.000	0.000	0.001	0.002	0.006	0.011	0.000	0.013	304.610	0.570	NaN	1.644608	0.1090414E-01	-0.8215290
08112011	12	0.024	0.064	0.042	0.000	0.000	0.000	0.001	0.005	0.012	0.000	0.012	305.528	0.544	NaN	1.095674	0.1691061E-01	-1.188478
08112011	13	0.019	0.052	0.035	0.000	0.000	0.000	0.001	0.004	0.013	0.000	0.011	306.598	0.505	NaN	0.8776209	0.1391402E-01	-1.200146
08112011	14	0.014	0.037	0.026	0.000	0.000	0.000	0.001	0.003	0.014	0.000	0.011	306.778	0.493	NaN	0.7462850	0.1098124E-01	-1.167747
08112011	15	0.010	0.023	0.022	0.000	0.000	0.000	0.001	0.003	0.017	0.000	0.012	306.114	0.510	NaN	0.8007306	0.1002759E-01	-1.097710
08112011	16	0.010	0.016	0.020	0.000	0.000	0.000	0.001	0.003	0.016	0.000	0.012	305.348	0.533	NaN	0.8334078	0.9126564E-02	-1.039450
08112011	17	0.015	0.015	0.020	0.000	0.000	0.000	0.001	0.003	0.013	0.000	0.011	304.293	0.568	NaN	0.9985744	0.5142953E-02	-0.7118321
08112011	18	0.033	0.016	0.026	0.000	0.000	0.001	0.002	0.007	0.006	0.000	0.012	303.083	0.617	NaN	1.478622	0.7921154E-04	1.271069
08112011	19	0.044	0.018	0.027	0.000	0.001	0.001	0.002	0.011	0.001	0.000	0.012	301.906	0.666	NaN	1.389437	0.2543320E-04	1.737438
08112011	20	0.048	0.022	0.017	0.000	0.001	0.001	0.003	0.015	0.000	0.000	0.013	301.051	0.698	NaN	0.9584848	0.1565123E-04	1.787037
08112011	21	0.044	0.023	0.013	0.001	0.001	0.001	0.003	0.015	0.000	0.000	0.012	300.147	0.727	0.000000	0.8512634E-09	0.7859559E-19	7.034666
08112011	22	0.043	0.021	0.012	0.001	0.001	0.001	0.003	0.013	0.000	0.000	0.011	299.399	0.749	0.000000	0.8346336E-09	0.7607585E-19	7.040249
08112011	23	0.042	0.018	0.011	0.001	0.001	0.001	0.003	0.011	0.000	0.000	0.011	298.834	0.773	0.000000	0.8768378E-09	0.1000076E-13	1.942886
08112011	24	0.041	0.015	0.009	0.001	0.001	0.001	0.002	0.010	0.000	0.000	0.011	298.403	0.787	0.1226687E-01	0.1539642	0.6632017E-07	3.365774
08122011	01	0.039	0.013	0.008	0.001	0.001	0.000	0.002	0.009	0.002	0.000	0.011	297.867	0.818	0.9042621E-02	0.3786886	0.1866241E-05	2.307315
08122011	02	0.040	0.012	0.008	0.000	0.001	0.000	0.002	0.008	0.006	0.000	0.013	297.661	0.813	NaN	1.738149	0.2312598E-04	1.875987
08122011	03	0.042	0.013	0.008	0.001	0.001	0.000	0.002	0.009	0.010	0.000	0.015	297.270	0.832	0.1552159E-01	1.195457	0.2057485E-04	1.764197
08122011	04	0.049	0.015	0.009	0.001	0.001	0.001	0.003	0.010	0.011	0.000	0.017	297.024	0.835	0.3045911E-01	1.521613	0.1150872E-04	2.121277
08122011	05	0.067	0.019	0.010	0.001	0.001	0.001	0.003	0.012	0.009	0.001	0.019	296.731	0.845	0.4684395E-01	1.646437	0.8760577E-05	2.274013
08122011	06	0.097	0.024	0.012	0.001	0.001	0.002	0.004	0.017	0.003	0.002	0.021	296.473	0.853	0.1293127	1.185614	0.6549189E-06	3.257756
08122011	07	0.124	0.028	0.016	0.000	0.001	0.003	0.006	0.023	0.001	0.001	0.022	297.018	0.852	NaN	2.476262	0.1284126E-04	2.285189
08122011	08	0.110	0.026	0.028	0.000	0.001	0.003	0.006	0.023	0.001	0.001	0.021	298.898	0.765	NaN	2.385671	0.1410213E-04	2.228326
08122011	09	0.056	0.022	0.033	0.000	0.001	0.001	0.003	0.012	0.009	0.001	0.019	300.813	0.702	NaN	2.766522	0.4502618E-04	1.788469
08122011	10	0.033	0.033	0.042	0.000	0.001	0.001	0.002	0.008	0.017	0.001	0.018	302.716	0.639	NaN	2.482692	0.5010801E-02	-0.3049842
08122011	11	0.024	0.036	0.048	0.000	0.000	0.001	0.002	0.006	0.021	0.000	0.018	304.318	0.578	NaN	1.795199	0.1923869E-01	-1.030063
08122011	12	0.016	0.033	0.040	0.000	0.000	0.001	0.002	0.005	0.022	0.000	0.017	305.695	0.524	NaN	1.266114	0.1875345E-01	-1.170608
08122011	13	0.012	0.026	0.032	0.000	0.000	0.000	0.001	0.004	0.020	0.000	0.015	305.791	0.484	NaN	0.8618087	0.1929172E-01	-1.349960
08122011	14	0.011	0.022	0.028	0.000	0.000	0.000	0.001	0.004	0.016	0.000	0.013	307.259	0.455	NaN	0.6692836	0.1637330E-01	-1.388526
08122011	15	0.009	0.016	0.026	0.000	0.000	0.000	0.001	0.003	0.015	0.000	0.012	306.457	0.450	NaN	0.5948986	0.1789549E-01	-1.478301
08122011	16	0.008	0.012	0.028	0.000	0.000	0.000	0.001	0.004	0.016	0.000	0.012	306.642	0.459	NaN	0.5947765	0.1786139E-01	-1.477561
08122011	17	0.007	0.009	0.024	0.000	0.000	0.000	0.001	0.004	0.015	0.000	0.012	306.349	0.465	NaN	0.5799457	0.1590114E-01	-1.438041
08122011	18	0.019	0.010	0.023	0.000	0.000	0.001	0.001	0.005	0.010	0.000	0.012	305.408	0.479	NaN	0.8070213	0.3045443E-02	-0.5767654
08122011	19	0.044	0.011	0.031	0.000	0.000	0.001	0.002	0.011	0.001	0.000	0.012	303.769	0.515	NaN	0.7733873	0.9496156E-05	1.910849
08122011	20	0.048	0.009	0.026	0.000	0.001	0.001	0.003	0.011	0.000	0.000	0.011	300.466	0.666	NaN	1.268394	0.2329459E-04	1.735999
08122011	21	0.043	0.006	0.019	0.000	0.000	0.001	0.001	0.005	0.007	0.000	0.010	299.433	0.670	NaN	1.502715	0.2388383E-04	1.798773
08122011	22	0.049	0.006	0.017	0.000	0.001	0.001	0.001	0.004	0.007	0.000	0.009	298.691	0.686	NaN	1.542463	0.1656673E-04	1.968978
08122011	23	0.058	0.006	0.015	0.001	0.001	0.001	0.001	0.004	0.006	0.000	0.008	298.171	0.704	0.8817971E-02	0.5397648	0.5956855E-05	1.957188
08122011	24	0.070	0.007	0.014	0.001	0.001	0.001	0.002	0.004	0.004	0.000	0.008	297.717	0.725	0.1542056E-01	0.5835163	0.2960667E-05	2.294663
08132011	01	0.076	0.008	0.011	0.001	0.001	0.001	0.002	0.004	0.002	0.001	0.008	297.091	0.768	0.2264678E-01	0.6719725	0.2664416E-05	2.401749
08132011	02	0.074	0.008	0.008	0.001	0.001	0.001	0.002	0.004	0.001	0.001	0.007	296.682	0.796	0.3913921E-01	0.5923193	0.8643244E-06	2.835879
08132011	03	0.070	0.008	0.007	0.002	0.001	0.001	0.002	0.004	0.001	0.001	0.007	296.377	0.803	0.3978229E-01	0.5923529	0.8818624E-06	2.827180
08132011	04	0.069	0.009	0.006	0.002	0.001	0.001	0.002	0.004	0.001	0.001	0.007	296.083	0.826	0.4994160E-01	0.6789857	0.9180553E-06	2.868992
08132011	05	0.073	0.011	0.007	0.002	0.001	0.001	0.002	0.003	0.002	0.001	0.007	295.897	0.837	0.4443854E-01	0.9218374	0.2618082E-05	2.546671
08132011	06	0.079	0.013	0.008	0.001	0.001	0.001	0.002	0.003	0.003	0.001	0.007	295.697	0.855	0.5991507E-01	1.057835	0.2438692E-05	2.637261
08132011	07	0.077	0.014	0.010	0.001	0.001	0.001	0.002	0.003	0.004	0.001	0.007	296.027	0.850	0.5071175E-01	0.9979616	0.2533305E-05	2.595426
08132011	08	0.045	0.007	0.015	0.001	0.001	0.001	0.002	0.002	0.009	0.001	0.008	297.083	0.832	0.2194268E-01	1.262909	0.1173980E-04	2.031711
08132011	09	0.023	0.004	0.017	0.001	0.001	0.001	0.001	0.001	0.012	0.000	0.008	298.633	0.789	0.7458866E-02	1.201059	0.4115892E-04	1.465100
08132011	10	0.014	0.003	0.019	0.000	0.000	0.000	0.001	0.001	0.013	0.000	0.008	300.108	0.739	NaN	1.868426	0.3371275E-02	-0.2563182
08132011	11	0.011	0.005	0.025	0.000	0.000	0.000	0.000	0.001	0.015	0.000	0.008	301.601	0.692	NaN	1.429307	0.1108291E-01	-0.8895282
08132011	12	0.011	0.009	0.039	0.000	0.000	0.000	0.000	0.001	0.017	0.000	0.009	303.084	0.648	NaN	1.327608	0.2571015E-01	-1.287035
08132011	13	0.011	0.014	0.053	0.000	0.000	0.000	0.000	0.001	0.019	0.000	0.011	304.412	0.612	NaN	1.252152	0.4226258E-01	-1.528299
08132011	14	0.012	0.020	0.061	0.000	0.000	0.000	0.000	0.001	0.021	0.000	0.012	305.241	0.578	NaN	1.244171	0.4931440E-01	-1.598094
08132011	15	0.014	0.023	0.063	0.000	0.000	0.000	0.000	0.001	0.022	0.000	0.012	305.289	0.566	NaN	1.295240	0.4816189E-01	-1.570353
08132011	16	0.016	0.015	0.058	0.000	0.000	0.000	0.000	0.001	0.024	0.000	0.014	304.502	0.583	NaN	1.502327	0.4267499E-01	-1.453409
08132011	17	0.017	0.007	0.041	0.000	0.000	0.000	0.000	0.001	0.022	0.000	0.012	303.989	0.573	NaN	1.386180	0.2187472E-01	-1.198123
08132011	18	0.018	0.006	0.030	0.000	0.000	0.000	0.000	0.001	0.016	0.000	0.010	303.075	0.565	NaN	1.154590	0.1204955E-01	-1.018543
08132011	19	0.034	0.010	0.031	0.000	0.000	0.001	0.001	0.001	0.013	0.000	0.009	301.655	0.632	NaN	2.023359	0.2794336E-03	0.8597941
08132011	20	0.037	0.010	0.024	0.000	0.000	0.001	0.001	0.001	0.013	0.000	0.009	300.172	0.679	NaN	2.140597	0.8303348E-04	1.411282
08132011	21	0.028	0.008	0.015	0.000	0.000	0.001	0.000	0.001	0.014	0.000	0.008	299.535	0.688	NaN	1.650528	0.6700651E-04	1.391506
08132011	22	0.018	0.006	0.010	0.000	0.000	0.000	0.000	0.001	0.015	0.000	0.008	298.850	0.723	NaN	1.479293	0.1339564E-03	1.043091
08132011	23	0.015	0.004	0.008	0.000	0.000	0.000	0.000	0.001	0.015	0.000	0.008	298.586	0.729	NaN	1.408207	0.1599066E-03	0.9448001
08132011	24	0.015	0.004	0.007	0.000	0.000	0.000	0.000	0.000	0.014	0.000	0.008	298.211	0.757	0.2896070E-02	1.157743	0.1783826E-03	0.8122594
08142011	01	0.017	0.005	0.008	0.000	0.000	0.000	0.000	0.001	0.013	0.000	0.007	297.799	0.794	NaN	1.702587	0.1128757E-03	1.178509
08142011	02	0.020	0.007	0.009	0.000	0.000	0.000	0.000	0.001	0.012	0.000	0.007	297.496	0.814	NaN	2.009801	0.1029258E-03	1.290629
08142011	03	0.023	0.009	0.010	0.000	0.000	0.000	0.000	0.001	0.011	0.000	0.007	297.172	0.834	NaN	2.398991	0.9611435E-04	1.397240
08142011	04	0.026	0.010	0.010	0.000	0.000	0.000	0.001	0.001	0.010	0.000	0.006	296.777	0.858	NaN	2.750041	0.5654365E-04	1.686955
08142011	05	0.032	0.012	0.010	0.000	0.001	0.000	0.001	0.001	0.008	0.000	0.006	296.511	0.858	NaN	2.769466	0.4116196E-04	1.827900
08142011	06	0.041	0.014	0.010	0.000	0.001	0.001	0.001	0.001	0.007	0.000	0.006	296.099	0.879	NaN	3.314096	0.2442814E-04	2.132475
08142011	07	0.047	0.016	0.011	0.001	0.001	0.001	0.001	0.002	0.006	0.000	0.006	296.425	0.865	0.2912474E-01	1.094821	0.5947412E-05	2.265015
08142011	08	0.041	0.016	0.015	0.001	0.001	0.001	0.001	0.002	0.005	0.001	0.006	297.673	0.816	0.1264143E-01	0.8204538	0.7692434E-05	2.027990
08142011	09	0.031	0.020	0.019	0.001	0.002	0.001	0.001	0.002	0.006	0.001	0.007	299.086	0.760	0.6350338E-02	0.8064013	0.1669207E-04	1.684041
08142011	10	0.027	0.021	0.033	0.001	0.002	0.001	0.001	0.002	0.007	0.001	0.007	300.483	0.693	0.3043473E-02	0.6508080	0.2130223E-04	1.485028
08142011	11	0.022	0.026	0.050	0.001	0.001	0.001	0.001	0.002	0.009	0.001	0.008	301.645	0.632	0.2015769E-02	0.6269122	0.3195574E-04	1.292658
08142011	12	0.020	0.034	0.052	0.000	0.001	0.001	0.001	0.003	0.010	0.000	0.009	302.580	0.592	NaN	1.303657	0.2878113E-01	-1.343945
08142011	13	0.016	0.043	0.038	0.000	0.001	0.001	0.001	0.004	0.009	0.000	0.010	305.674	0.487	NaN	0.7796588	0.1954772E-01	-1.399191
08142011	14	0.008	0.034	0.017	0.000	0.000	0.000	0.001	0.003	0.013	0.000	0.010	306.551	0.447	NaN	0.4990419	0.7560376E-02	-1.180406
08142011	15	0.004	0.023	0.012	0.000	0.000	0.000	0.001	0.002	0.016	0.000	0.011	306.151	0.443	NaN	0.5079384	0.7847375E-02	-1.188913
08142011	16	0.003	0.017	0.010	0.000	0.000	0.000	0.001	0.002	0.017	0.000	0.012	305.505	0.452	0.4553676E-02	0.6459900	0.3628388E-02	-0.7494879
08142011	17	0.004	0.014	0.009	0.000	0.000	0.000	0.001	0.002	0.018	0.000	0.012	304.489	0.472	NaN	0.6141056	0.5106524E-02	-0.9198823
08142011	18	0.013	0.014	0.008	0.000	0.000	0.000	0.001	0.003	0.015	0.000	0.011	303.280	0.498	NaN	0.6540602	0.2884188E-03	0.3555942
08142011	19	0.035	0.014	0.009	0.001	0.001	0.001	0.001	0.005	0.008	0.000	0.011	301.926	0.541	0.3829956E-02	0.4897223	0.1161068E-04	1.625092
08142011	20	0.052	0.014	0.007	0.001	0.001	0.001	0.002	0.008	0.001	0.000	0.010	300.605	0.578	0.1508868E-01	0.1729104	0.9821217E-07	3.245656
08142011	21	0.047	0.013	0.005	0.001	0.001	0.001	0.002	0.006	0.000	0.000	0.008	299.669	0.598	0.1947445E-01	0.1847834	0.1017334E-06	3.259199
08142011	22	0.026	0.016	0.004	0.001	0.001	0.001	0.001	0.004	0.000	0.000	0.006	298.980	0.610	0.2389300E-01	0.2445943	0.1807856E-06	3.131282
08142011	23	0.019	0.012	0.004	0.001	0.001	0.000	0.001	0.004	0.000	0.000	0.005	298.367	0.624	0.8616567E-02	0.9080816E-01	0.1803466E-06	2.702017
08142011	24	0.016	0.011	0.005	0.001	0.001	0.000	0.001	0.005	0.001	0.000	0.007	297.663	0.644	0.2431750E-02	0.1925247	0.5523631E-05	1.542262
08152011	01	0.015	0.013	0.006	0.001	0.001	0.000	0.001	0.006	0.005	0.000	0.009	296.908	0.669	0.3976822E-02	0.3190649	0.1170607E-04	1.435468
08152011	02	0.015	0.015	0.007	0.001	0.001	0.000	0.002	0.006	0.011	0.000	0.013	296.139	0.695	0.9804428E-02	0.8060228	0.3303201E-04	1.387412
08152011	03	0.016	0.017	0.008	0.001	0.001	0.000	0.002	0.007	0.019	0.000	0.017	295.494	0.714	0.1426542E-01	1.196846	0.5795834E-04	1.314922
08152011	04	0.021	0.018	0.009	0.001	0.001	0.000	0.002	0.008	0.027	0.000	0.023	295.012	0.724	0.2158773E-01	1.864373	0.1020515E-03	1.261713
08152011	05	0.031	0.020	0.010	0.001	0.001	0.001	0.003	0.010	0.035	0.001	0.029	294.520	0.735	0.3967285E-01	2.606894	0.9022376E-04	1.460802
08152011	06	0.048	0.023	0.011	0.001	0.001	0.001	0.003	0.013	0.041	0.001	0.036	294.017	0.749	0.7766271E-01	3.300107	0.7601852E-04	1.637609
08152011	07	0.049	0.025	0.014	0.001	0.001	0.002	0.003	0.013	0.050	0.002	0.041	293.730	0.772	0.1140310	4.443874	0.8141328E-04	1.737067
08152011	08	0.029	0.027	0.024	0.001	0.001	0.002	0.003	0.010	0.063	0.003	0.044	294.898	0.740	0.5803251E-01	4.741636	0.1940183E-03	1.388085
08152011	09	0.004	0.033	0.033	0.001	0.001	0.001	0.002	0.006	0.066	0.001	0.044	296.609	0.687	0.000000	4.311034	0.4419646E-02	-0.1080608E-01
08152011	10	0.001	0.030	0.038	0.000	0.001	0.001	0.002	0.005	0.057	0.001	0.044	298.405	0.630	0.5411506E-03	3.225144	0.8149163E-02	-0.4025639
08152011	11	0.001	0.025	0.044	0.000	0.001	0.000	0.002	0.005	0.055	0.000	0.044	300.175	0.580	0.1378655E-03	2.528624	0.9560819E-02	-0.5776109
08152011	12	0.001	0.027	0.045	0.000	0.001	0.000	0.002	0.004	0.056	0.000	0.044	301.672	0.538	0.8451939E-04	2.246083	0.7443661E-02	-0.5203607
08152011	13	0.002	0.022	0.034	0.000	0.000	0.000	0.001	0.004	0.050	0.000	0.037	302.217	0.504	0.8612871E-04	1.686718	0.8802975E-02	-0.7175870
08152011	14	0.003	0.017	0.027	0.000	0.000	0.000	0.001	0.004	0.045	0.000	0.031	303.597	0.480	0.3052354E-03	1.460180	0.5771636E-02	-0.5968925
08152011	15	0.006	0.014	0.027	0.000	0.000	0.000	0.001	0.004	0.047	0.000	0.029	302.133	0.486	NaN	1.619523	0.2069634E-01	-1.106507
08152011	16	0.022	0.013	0.032	0.000	0.001	0.001	0.002	0.006	0.041	0.001	0.028	301.360	0.499	NaN	1.959890	0.6309876E-02	-0.5077892
08152011	17	0.026	0.012	0.033	0.000	0.001	0.001	0.002	0.007	0.034	0.001	0.026	301.762	0.504	NaN	1.831917	0.4645703E-02	-0.4041456
08152011	18	0.016	0.012	0.020	0.000	0.000	0.000	0.001	0.005	0.037	0.000	0.024	300.893	0.517	NaN	1.632133	0.3332139E-02	-0.3099675
08152011	19	0.027	0.011	0.018	0.000	0.001	0.001	0.002	0.008	0.030	0.000	0.025	299.888	0.530	NaN	1.670721	0.2326953E-03	0.8561164
08152011	20	0.055	0.014	0.017	0.000	0.001	0.001	0.004	0.017	0.014	0.001	0.028	298.733	0.557	NaN	1.359774	0.2370282E-04	1.758667
08152011	21	0.058	0.014	0.015	0.000	0.001	0.002	0.005	0.022	0.010	0.001	0.032	297.773	0.588	NaN	1.413191	0.1387722E-04	2.007898
08152011	22	0.046	0.014	0.012	0.001	0.001	0.002	0.005	0.022	0.019	0.001	0.036	297.084	0.613	0.1437533E-01	1.287367	0.3578129E-04	1.556046
08152011	23	0.033	0.014	0.010	0.001	0.001	0.001	0.005	0.018	0.035	0.001	0.039	296.544	0.635	0.1999050E-01	2.017157	0.1053526E-03	1.282095
08152011	24	0.024	0.014	0.008	0.001	0.001	0.001	0.004	0.015	0.044	0.001	0.040	296.024	0.658	0.2898711E-01	2.579623	0.1329696E-03	1.287804
08162011	01	0.020	0.015	0.008	0.001	0.001	0.001	0.004	0.014	0.046	0.001	0.040	295.510	0.686	0.3335661E-01	2.956929	0.1501488E-03	1.294319
08162011	02	0.018	0.016	0.006	0.001	0.001	0.001	0.004	0.013	0.046	0.001	0.039	295.072	0.706	0.4047000E-01	3.162076	0.1406026E-03	1.351979
08162011	03	0.019	0.017	0.006	0.001	0.001	0.001	0.004	0.013	0.044	0.001	0.038	294.671	0.723	0.4076493E-01	3.148107	0.1407472E-03	1.349610
08162011	04	0.025	0.017	0.006	0.001	0.001	0.001	0.004	0.014	0.039	0.001	0.037	294.324	0.737	0.4015946E-01	3.114683	0.1340285E-03	1.366217
08162011	05	0.035	0.017	0.006	0.001	0.001	0.001	0.004	0.016	0.034	0.001	0.036	293.916	0.757	0.5557942E-01	2.938688	0.7960437E-04	1.567217
08162011	06	0.048	0.018	0.007	0.001	0.001	0.002	0.005	0.017	0.030	0.001	0.035	293.578	0.776	0.9244531E-01	2.948436	0.3567272E-04	1.917256
08162011	07	0.067	0.019	0.009	0.001	0.001	0.002	0.005	0.020	0.019	0.002	0.034	293.608	0.796	0.1132985	2.578884	0.1685771E-04	2.184633
08162011	08	0.057	0.019	0.018	0.001	0.001	0.002	0.005	0.020	0.016	0.002	0.032	295.032	0.757	0.5486399E-01	1.889938	0.1614904E-04	2.068301
08162011	09	0.032	0.020	0.031	0.000	0.001	0.001	0.004	0.013	0.022	0.001	0.026	297.238	0.668	NaN	2.916619	0.3327095E-03	0.9428145
08162011	10	0.022	0.025	0.045	0.000	0.001	0.001	0.003	0.009	0.024	0.001	0.023	299.362	0.578	NaN	1.922160	0.1900493E-01	-0.9950767
08162011	11	0.020	0.028	0.053	0.000	0.000	0.001	0.002	0.007	0.027	0.001	0.021	301.003	0.517	NaN	1.524574	0.2891885E-01	-1.278033
08162011	12	0.019	0.026	0.054	0.000	0.000	0.001	0.002	0.006	0.028	0.000	0.021	302.409	0.472	NaN	1.285811	0.3110756E-01	-1.383689
08162011	13	0.021	0.024	0.058	0.000	0.000	0.001	0.002	0.006	0.028	0.000	0.021	303.757	0.431	NaN	1.132068	0.3308583E-01	-1.465770
08162011	14	0.022	0.021	0.058	0.000	0.000	0.001	0.002	0.006	0.026	0.000	0.020	304.651	0.403	NaN	0.9661086	0.3233763E-01	-1.524682
08162011	15	0.022	0.017	0.054	0.000	0.000	0.001	0.002	0.005	0.025	0.000	0.019	304.605	0.399	NaN	0.9538972	0.2903323E-01	-1.483394
08162011	16	0.024	0.015	0.056	0.000	0.000	0.001	0.002	0.005	0.023	0.000	0.018	304.002	0.404	NaN	0.9306617	0.2933393E-01	-1.498578
08162011	17	0.028	0.014	0.056	0.000	0.000	0.001	0.002	0.006	0.022	0.000	0.018	303.485	0.410	NaN	0.9873034	0.2375507E-01	-1.381306
08162011	18	0.033	0.014	0.054	0.000	0.000	0.001	0.002	0.007	0.020	0.000	0.018	302.724	0.418	NaN	1.050515	0.1633728E-01	-1.191777
08162011	19	0.051	0.017	0.057	0.000	0.001	0.001	0.003	0.012	0.009	0.000	0.019	301.600	0.426	NaN	1.138096	0.3118003E-02	-0.4376977
08162011	20	0.084	0.025	0.065	0.000	0.001	0.002	0.005	0.023	0.000	0.000	0.020	300.171	0.452	NaN	1.080366	0.5163361E-05	2.320638
08162011	21	0.101	0.031	0.071	0.000	0.001	0.002	0.006	0.028	0.000	0.000	0.021	298.939	0.484	NaN	1.397282	0.4085046E-05	2.534087
08162011	22	0.111	0.033	0.077	0.000	0.001	0.003	0.007	0.030	0.000	0.000	0.021	297.908	0.521	NaN	1.863801	0.6381435E-05	2.465481
08162011	23	0.118	0.030	0.073	0.000	0.001	0.003	0.007	0.031	0.000	0.001	0.021	297.021	0.564	NaN	2.172436	0.6840319E-05	2.501871
08162011	24	0.118	0.026	0.059	0.000	0.001	0.002	0.007	0.030	0.001	0.002	0.020	296.242	0.611	NaN	2.256512	0.6489607E-05	2.541219
08172011	01	0.111	0.020	0.042	0.000	0.001	0.002	0.007	0.028	0.001	0.001	0.019	295.512	0.662	NaN	2.023290	0.5753957E-05	2.546092
08172011	02	0.100	0.017	0.027	0.000	0.001	0.002	0.007	0.026	0.001	0.001	0.019	295.010	0.703	NaN	1.579851	0.5049861E-05	2.495337
08172011	03	0.088	0.015	0.019	0.000	0.001	0.002	0.007	0.025	0.001	0.001	0.019	294.694	0.728	NaN	1.315463	0.4969329E-05	2.422781
08172011	04	0.080	0.016	0.015	0.000	0.001	0.002	0.007	0.024	0.001	0.001	0.020	294.443	0.751	NaN	1.172653	0.5012505E-05	2.369115
08172011	05	0.084	0.018	0.014	0.000	0.002	0.002	0.007	0.025	0.001	0.001	0.020	294.236	0.773	NaN	1.234137	0.5231995E-05	2.372696
08172011	06	0.099	0.022	0.012	0.000	0.002	0.003	0.008	0.029	0.001	0.001	0.021	294.163	0.787	NaN	1.211140	0.4464162E-05	2.433455
08172011	07	0.097	0.022	0.002	0.004	0.002	0.004	0.010	0.034	0.001	0.011	0.023	294.639	0.796	NaN	2.484976	0.1946504E-09	7.106067
08172011	08	0.062	0.019	0.017	0.001	0.002	0.004	0.010	0.033	0.001	0.005	0.025	296.150	0.763	0.000000	0.1749997E-08	0.1423320E-18	7.089735
08172011	09	0.044	0.021	0.030	0.001	0.002	0.003	0.008	0.023	0.004	0.002	0.026	298.263	0.696	0.1517045E-01	0.2929851	0.1655949E-06	3.247798
08172011	10	0.032	0.048	0.044	0.000	0.002	0.002	0.005	0.014	0.018	0.001	0.027	300.430	0.623	NaN	2.598213	0.6197100E-02	-0.3775137
08172011	11	0.022	0.086	0.058	0.000	0.001	0.001	0.004	0.010	0.033	0.001	0.030	302.617	0.547	NaN	2.090564	0.3333376E-01	-1.202621
08172011	12	0.017	0.074	0.051	0.000	0.001	0.001	0.003	0.007	0.040	0.001	0.030	304.029	0.496	NaN	1.858615	0.3120690E-01	-1.225061
08172011	13	0.017	0.058	0.044	0.000	0.001	0.001	0.003	0.007	0.039	0.000	0.028	305.493	0.451	NaN	1.503894	0.1959367E-01	-1.114899
08172011	14	0.012	0.040	0.038	0.000	0.001	0.001	0.002	0.006	0.043	0.000	0.029	306.217	0.430	NaN	1.433811	0.1976260E-01	-1.139352
08172011	15	0.005	0.027	0.037	0.000	0.001	0.001	0.002	0.005	0.050	0.000	0.035	306.037	0.430	0.5548179E-02	1.596756	0.6012628E-02	-0.5758259
08172011	16	0.002	0.020	0.037	0.000	0.001	0.001	0.002	0.005	0.052	0.000	0.040	305.462	0.436	0.9900331E-04	1.577845	0.6040024E-02	-0.5829742
08172011	17	0.002	0.017	0.036	0.000	0.001	0.001	0.002	0.006	0.055	0.000	0.043	304.499	0.445	0.1073480E-03	1.713279	0.6640622E-02	-0.5883806
08172011	18	0.004	0.017	0.033	0.000	0.001	0.001	0.002	0.007	0.061	0.000	0.045	303.457	0.460	0.5424619E-03	2.017487	0.6721134E-02	-0.5226318
08172011	19	0.022	0.019	0.030	0.000	0.001	0.001	0.004	0.013	0.064	0.001	0.047	302.146	0.489	NaN	2.597708	0.4387603E-02	-0.2276371
08172011	20	0.055	0.021	0.027	0.000	0.001	0.002	0.005	0.022	0.046	0.001	0.049	300.658	0.506	NaN	2.448241	0.1213040E-03	1.304979
08172011	21	0.073	0.025	0.030	0.000	0.001	0.002	0.006	0.023	0.042	0.001	0.049	299.480	0.542	NaN	2.705029	0.6725715E-04	1.604433
08172011	22	0.081	0.026	0.031	0.000	0.001	0.002	0.006	0.023	0.040	0.001	0.047	298.652	0.569	NaN	2.882547	0.4555576E-04	1.801233
08172011	23	0.079	0.024	0.029	0.000	0.001	0.002	0.006	0.022	0.039	0.001	0.045	297.935	0.595	NaN	3.051568	0.4382484E-04	1.842803
08172011	24	0.069	0.021	0.025	0.000	0.001	0.002	0.006	0.020	0.039	0.001	0.044	297.330	0.620	NaN	3.215287	0.5671107E-04	1.753552
08182011	01	0.056	0.018	0.020	0.000	0.001	0.002	0.006	0.019	0.039	0.001	0.042	296.808	0.644	NaN	3.142298	0.6475648E-04	1.685964
08182011	02	0.042	0.015	0.016	0.000	0.002	0.001	0.006	0.018	0.038	0.001	0.041	296.320	0.679	NaN	3.377938	0.1054907E-03	1.505438
08182011	03	0.036	0.014	0.013	0.001	0.002	0.001	0.006	0.017	0.035	0.001	0.039	296.090	0.695	0.2971953E-01	2.591212	0.9860030E-04	1.419625
08182011	04	0.041	0.015	0.011	0.001	0.002	0.001	0.006	0.018	0.029	0.001	0.037	295.832	0.719	0.3492534E-01	2.407341	0.6558666E-04	1.564722
08182011	05	0.060	0.017	0.011	0.001	0.002	0.002	0.007	0.019	0.020	0.001	0.035	295.615	0.744	0.5724025E-01	2.258332	0.2377303E-04	1.977703
08182011	06	0.093	0.022	0.010	0.001	0.003	0.003	0.008	0.024	0.007	0.002	0.033	295.397	0.770	0.1931518	1.681063	0.1147216E-05	3.165939
08182011	07	0.119	0.027	0.012	0.001	0.003	0.004	0.010	0.030	0.002	0.002	0.032	295.833	0.789	0.5261236E-01	0.3586514	0.1193400E-06	3.477887
08182011	08	0.096	0.025	0.025	0.001	0.003	0.005	0.010	0.033	0.002	0.002	0.030	297.732	0.749	0.000000	0.2320977E-08	0.1000289E-13	2.365545
08182011	09	0.047	0.019	0.038	0.001	0.002	0.002	0.006	0.017	0.005	0.002	0.023	299.842	0.677	0.3012288E-01	0.7894470	0.8507422E-06	2.967525
08182011	10	0.027	0.046	0.049	0.000	0.001	0.001	0.003	0.009	0.011	0.001	0.017	301.841	0.606	NaN	1.763874	0.1927348E-01	-1.038493
08182011	11	0.016	0.049	0.062	0.000	0.001	0.001	0.002	0.006	0.019	0.001	0.018	303.605	0.541	NaN	1.327157	0.4594091E-01	-1.539277
08182011	12	0.008	0.044	0.068	0.000	0.001	0.001	0.002	0.005	0.027	0.001	0.021	304.992	0.493	NaN	1.196344	0.6030955E-01	-1.702530
08182011	13	0.006	0.031	0.060	0.000	0.001	0.001	0.002	0.005	0.031	0.000	0.022	305.975	0.447	NaN	1.105298	0.5096767E-01	-1.663815
08182011	14	0.005	0.022	0.053	0.000	0.001	0.001	0.002	0.005	0.033	0.000	0.023	305.779	0.434	NaN	1.071672	0.4474459E-01	-1.620679
08182011	15	0.005	0.017	0.053	0.000	0.001	0.001	0.002	0.005	0.034	0.000	0.024	305.657	0.445	NaN	1.183032	0.4557184E-01	-1.585700
08182011	16	0.004	0.013	0.049	0.000	0.000	0.001	0.001	0.005	0.033	0.000	0.025	305.663	0.450	0.3520668E-02	1.141932	0.4805050E-02	-0.6240575
08182011	17	0.003	0.009	0.043	0.000	0.000	0.001	0.001	0.004	0.031	0.000	0.024	305.344	0.459	0.3060102E-03	1.082945	0.4527290E-02	-0.6212319
08182011	18	0.005	0.008	0.038	0.000	0.000	0.001	0.001	0.005	0.031	0.000	0.024	304.464	0.477	0.4923224E-02	1.308411	0.4679800E-02	-0.5534832
08182011	19	0.031	0.011	0.044	0.000	0.001	0.001	0.002	0.009	0.023	0.000	0.023	303.010	0.512	NaN	1.668671	0.9426076E-02	-0.7519603
08182011	20	0.051	0.015	0.040	0.000	0.001	0.001	0.003	0.012	0.013	0.000	0.022	300.273	0.629	NaN	2.573842	0.1015242E-03	1.404012
08182011	21	0.034	0.014	0.037	0.000	0.001	0.001	0.002	0.005	0.026	0.000	0.020	298.998	0.632	NaN	2.825547	0.1575683E-02	0.2536339
08182011	22	0.032	0.015	0.040	0.000	0.001	0.001	0.001	0.003	0.030	0.000	0.020	298.666	0.621	NaN	2.834313	0.5408322E-02	-0.2806148
08182011	23	0.038	0.018	0.047	0.000	0.001	0.001	0.002	0.004	0.030	0.001	0.021	297.883	0.661	NaN	3.592558	0.5829247E-02	-0.2102087
08182011	24	0.034	0.017	0.046	0.000	0.001	0.001	0.002	0.005	0.030	0.001	0.022	297.089	0.714	NaN	4.161898	0.7952441E-02	-0.2812090
08192011	01	0.025	0.016	0.038	0.000	0.001	0.001	0.002	0.006	0.033	0.001	0.024	296.320	0.770	NaN	4.950458	0.7705655E-02	-0.1921642
08192011	02	0.019	0.015	0.029	0.001	0.001	0.001	0.003	0.007	0.036	0.001	0.027	295.709	0.815	0.3066218E-01	3.862105	0.1535024E-03	1.400709
08192011	03	0.012	0.016	0.021	0.001	0.001	0.001	0.002	0.006	0.039	0.001	0.028	295.399	0.829	0.2775407E-01	4.411198	0.2385385E-03	1.266998
08192011	04	0.012	0.017	0.017	0.001	0.001	0.001	0.002	0.006	0.042	0.001	0.029	295.163	0.841	0.3376889E-01	4.876169	0.2345989E-03	1.317753
08192011	05	0.021	0.014	0.016	0.001	0.001	0.001	0.003	0.006	0.049	0.001	0.032	295.064	0.848	0.6247300E-01	5.914220	0.1678900E-03	1.546872
08192011	06	0.037	0.016	0.015	0.003	0.001	0.002	0.003	0.007	0.059	0.002	0.037	294.981	0.854	0.1289180	7.047502	0.1008749E-03	1.844252
08192011	07	0.053	0.019	0.014	0.007	0.001	0.003	0.003	0.007	0.070	0.004	0.042	295.411	0.862	0.2007737	9.063105	0.8134254E-04	2.046959
08192011	08	0.058	0.021	0.029	0.005	0.002	0.003	0.004	0.007	0.072	0.007	0.043	297.429	0.821	0.1182656	7.393738	0.8967711E-04	1.916183
08192011	09	0.046	0.019	0.056	0.002	0.002	0.003	0.003	0.006	0.062	0.005	0.039	299.150	0.760	0.4202116E-01	5.111242	0.1347673E-03	1.578942
08192011	10	0.031	0.019	0.081	0.000	0.001	0.002	0.003	0.004	0.049	0.003	0.031	300.855	0.691	NaN	4.971169	0.4245950E-01	-0.9315162
08192011	11	0.027	0.043	0.117	0.000	0.001	0.001	0.002	0.003	0.043	0.002	0.027	302.558	0.617	NaN	3.271803	0.8967979E-01	-1.437907
08192011	12	0.016	0.084	0.136	0.000	0.001	0.001	0.002	0.003	0.051	0.001	0.031	303.681	0.565	NaN	2.645462	0.1199667	-1.656559
08192011	13	0.022	0.078	0.159	0.000	0.001	0.001	0.002	0.005	0.053	0.001	0.035	304.816	0.521	NaN	2.561528	0.1390401	-1.734641
08192011	14	0.016	0.094	0.140	0.000	0.001	0.001	0.003	0.008	0.052	0.001	0.038	307.379	0.445	NaN	1.906780	0.1266178	-1.822194
08192011	15	0.005	0.080	0.072	0.000	0.001	0.001	0.002	0.005	0.049	0.000	0.035	306.882	0.432	0.1716554E-02	1.566393	0.6213945E-02	-0.5984668
08192011	16	0.006	0.056	0.053	0.000	0.001	0.001	0.002	0.005	0.046	0.000	0.033	306.502	0.437	0.4622221E-02	1.645361	0.6185922E-02	-0.5751433
08192011	17	0.005	0.043	0.042	0.000	0.001	0.001	0.002	0.005	0.046	0.000	0.034	306.135	0.448	0.1054764E-02	1.577748	0.5857118E-02	-0.5696462
08192011	18	0.006	0.036	0.034	0.000	0.001	0.001	0.002	0.007	0.048	0.000	0.035	305.201	0.465	0.7750928E-02	2.034408	0.6252274E-02	-0.4876001
08192011	19	0.026	0.038	0.035	0.000	0.001	0.001	0.003	0.012	0.042	0.000	0.036	303.787	0.487	NaN	2.033080	0.5761431E-02	-0.4523759
08192011	20	0.072	0.042	0.036	0.000	0.001	0.002	0.005	0.022	0.021	0.000	0.037	302.052	0.538	NaN	2.068832	0.3189474E-04	1.812006
08192011	21	0.084	0.039	0.034	0.000	0.001	0.002	0.006	0.025	0.016	0.001	0.038	300.646	0.600	NaN	2.372889	0.2007125E-04	2.072703
08192011	22	0.067	0.035	0.029	0.001	0.001	0.002	0.005	0.021	0.028	0.001	0.040	299.342	0.661	0.1936996E-01	2.033285	0.5139766E-04	1.597255
08192011	23	0.041	0.031	0.025	0.001	0.001	0.002	0.004	0.013	0.049	0.001	0.040	298.539	0.694	0.2607363E-01	3.153673	0.1291531E-03	1.387712
08192011	24	0.036	0.031	0.022	0.001	0.001	0.001	0.003	0.008	0.055	0.001	0.038	297.984	0.721	0.2674633E-01	3.795463	0.1989923E-03	1.280429
08202011	01	0.043	0.031	0.020	0.001	0.001	0.001	0.003	0.007	0.052	0.001	0.035	297.528	0.750	0.3866464E-01	3.974172	0.1375523E-03	1.460779
08202011	02	0.050	0.031	0.018	0.001	0.001	0.001	0.002	0.006	0.045	0.001	0.030	297.190	0.772	0.4590362E-01	3.714700	0.9648286E-04	1.585474
08202011	03	0.054	0.030	0.018	0.001	0.001	0.001	0.002	0.005	0.039	0.002	0.027	296.974	0.783	0.4973817E-01	3.569057	0.8215510E-04	1.637919
08202011	04	0.058	0.029	0.017	0.001	0.001	0.001	0.002	0.005	0.034	0.002	0.024	296.785	0.794	0.5281985E-01	3.237888	0.6041022E-04	1.729151
08202011	05	0.064	0.029	0.018	0.001	0.001	0.001	0.002	0.004	0.031	0.002	0.021	296.599	0.806	0.6335652E-01	3.218204	0.4441442E-04	1.860090
08202011	06	0.074	0.031	0.018	0.001	0.001	0.001	0.002	0.004	0.028	0.002	0.020	296.406	0.822	0.7628495E-01	3.224298	0.3481660E-04	1.966649
08202011	07	0.088	0.034	0.020	0.001	0.001	0.001	0.002	0.004	0.026	0.003	0.019	296.750	0.837	0.9300816E-01	3.468656	0.2660123E-04	2.115259
08202011	08	0.095	0.035	0.043	0.001	0.002	0.002	0.003	0.004	0.027	0.005	0.018	298.971	0.785	0.6417149E-01	2.674927	0.1819737E-04	2.167303
08202011	09	0.072	0.028	0.065	0.000	0.001	0.002	0.003	0.004	0.022	0.003	0.017	299.989	0.756	NaN	7.184468	0.3280695E-03	1.340429
08202011	10	0.052	0.032	0.074	0.000	0.001	0.001	0.003	0.006	0.019	0.002	0.018	301.719	0.693	NaN	4.232572	0.1785528E-01	-0.6251623
08202011	11	0.032	0.089	0.071	0.000	0.001	0.001	0.002	0.005	0.032	0.001	0.023	304.499	0.593	NaN	2.651085	0.3401878E-01	-1.108295
08202011	12	0.025	0.084	0.055	0.000	0.001	0.001	0.002	0.005	0.035	0.000	0.024	305.778	0.544	NaN	2.122726	0.2271299E-01	-1.029380
08202011	13	0.019	0.058	0.043	0.000	0.001	0.001	0.002	0.004	0.034	0.000	0.023	306.561	0.522	NaN	1.807174	0.1795527E-01	-0.9971920
08202011	14	0.011	0.041	0.036	0.000	0.001	0.001	0.001	0.004	0.034	0.000	0.023	306.566	0.522	NaN	1.611999	0.2089795E-01	-1.112739
08202011	15	0.006	0.034	0.031	0.000	0.001	0.001	0.001	0.004	0.033	0.000	0.022	305.833	0.537	NaN	1.537754	0.2048938E-01	-1.124642
08202011	16	0.005	0.029	0.027	0.000	0.001	0.001	0.001	0.004	0.031	0.000	0.021	304.913	0.564	NaN	1.528089	0.1773170E-01	-1.064602
08202011	17	0.004	0.018	0.022	0.000	0.000	0.001	0.001	0.004	0.027	0.000	0.020	303.538	0.602	0.8744955E-02	1.758423	0.4427734E-02	-0.4010581
08202011	18	0.005	0.012	0.018	0.000	0.000	0.001	0.001	0.004	0.027	0.000	0.020	302.018	0.648	0.1311892E-01	2.235306	0.4375664E-02	-0.2917070
08202011	19	0.014	0.017	0.019	0.000	0.001	0.001	0.002	0.007	0.025	0.000	0.021	300.614	0.692	NaN	2.423380	0.2053538E-02	0.7191875E-01
08202011	20	0.017	0.017	0.018	0.000	0.001	0.001	0.002	0.008	0.023	0.000	0.021	299.571	0.730	NaN	2.793702	0.7568698E-03	0.5671590
08202011	21	0.023	0.016	0.016	0.000	0.001	0.001	0.003	0.009	0.020	0.000	0.021	298.233	0.783	NaN	3.271513	0.1807089E-03	1.257769
08202011	22	0.028	0.012	0.015	0.000	0.001	0.001	0.003	0.010	0.017	0.001	0.021	297.434	0.822	NaN	3.892311	0.1172230E-03	1.521195
08202011	23	0.017	0.012	0.014	0.000	0.001	0.001	0.002	0.006	0.024	0.001	0.020	296.970	0.853	NaN	5.123217	0.5089534E-03	1.002865
08202011	24	0.013	0.013	0.012	0.000	0.001	0.001	0.002	0.004	0.027	0.001	0.019	296.659	0.875	NaN	6.289400	0.6279898E-03	1.000657
08212011	01	0.010	0.013	0.010	0.001	0.001	0.001	0.001	0.003	0.027	0.000	0.017	296.372	0.896	0.3511649E-01	4.579524	0.1077088E-03	1.628569
08212011	02	0.010	0.013	0.009	0.001	0.001	0.000	0.001	0.002	0.026	0.000	0.016	296.254	0.882	0.3328210E-01	3.855023	0.1048136E-03	1.565609
08212011	03	0.009	0.013	0.009	0.001	0.001	0.000	0.001	0.001	0.025	0.000	0.015	295.946	0.908	0.4120523E-01	5.085073	0.1172682E-03	1.637117
08212011	04	0.011	0.014	0.009	0.001	0.001	0.000	0.001	0.001	0.024	0.000	0.014	295.840	0.906	0.3849459E-01	4.721437	0.1098361E-03	1.633329
08212011	05	0.017	0.016	0.010	0.001	0.001	0.000	0.001	0.001	0.023	0.001	0.014	295.705	0.905	0.3562903E-01	4.723835	0.1215285E-03	1.589617
08212011	06	0.028	0.019	0.012	0.001	0.001	0.001	0.001	0.001	0.023	0.001	0.014	295.532	0.914	0.7021254E-01	4.905951	0.5880479E-04	1.921311
08212011	07	0.040	0.023	0.014	0.001	0.001	0.001	0.001	0.001	0.022	0.002	0.013	295.870	0.915	0.1049999	5.363549	0.3764396E-04	2.153757
08212011	08	0.044	0.023	0.030	0.001	0.001	0.001	0.001	0.001	0.021	0.003	0.013	297.596	0.872	0.4177231E-01	3.305326	0.4349555E-04	1.880769
08212011	09	0.042	0.021	0.053	0.000	0.001	0.001	0.001	0.002	0.019	0.002	0.012	299.264	0.817	NaN	7.024111	0.6486741E-02	0.3456484E-01
08212011	10	0.033	0.024	0.068	0.000	0.001	0.001	0.001	0.002	0.015	0.001	0.011	300.897	0.757	NaN	3.996513	0.3117256E-01	-0.8920912
08212011	11	0.030	0.069	0.081	0.000	0.001	0.001	0.002	0.004	0.017	0.001	0.014	303.850	0.633	NaN	2.278850	0.4772541E-01	-1.321034
08212011	12	0.024	0.096	0.063	0.000	0.001	0.001	0.001	0.004	0.022	0.000	0.016	305.343	0.578	NaN	1.868673	0.3394963E-01	-1.259302
08212011	13	0.015	0.063	0.042	0.000	0.000	0.000	0.001	0.003	0.019	0.000	0.014	306.405	0.546	NaN	1.157343	0.2708856E-01	-1.369324
08212011	14	0.005	0.035	0.028	0.000	0.000	0.000	0.001	0.003	0.023	0.000	0.015	306.512	0.543	NaN	0.9748232	0.2125214E-01	-1.338477
08212011	15	0.004	0.025	0.023	0.000	0.000	0.000	0.001	0.003	0.023	0.000	0.017	305.800	0.560	0.4625797E-02	1.047451	0.4117105E-02	-0.5944583
08212011	16	0.003	0.019	0.022	0.000	0.000	0.000	0.001	0.003	0.024	0.000	0.018	304.844	0.583	0.5607009E-03	1.127486	0.3970204E-02	-0.5467018
08212011	17	0.002	0.011	0.019	0.000	0.000	0.000	0.001	0.003	0.023	0.000	0.019	303.489	0.625	0.1677275E-03	1.289996	0.3550261E-02	-0.4396721
08212011	18	0.010	0.012	0.022	0.000	0.000	0.001	0.002	0.006	0.023	0.000	0.019	302.199	0.676	NaN	1.999071	0.7606752E-02	-0.5803710
08212011	19	0.029	0.018	0.032	0.000	0.001	0.001	0.003	0.009	0.016	0.000	0.020	301.024	0.724	NaN	3.155532	0.1834329E-02	0.2355954
08212011	20	0.044	0.023	0.034	0.000	0.001	0.002	0.003	0.012	0.009	0.000	0.020	300.002	0.761	NaN	3.860447	0.1219072E-03	1.500608
08212011	21	0.050	0.025	0.033	0.000	0.001	0.002	0.003	0.013	0.008	0.001	0.020	299.328	0.786	NaN	4.375705	0.7799351E-04	1.748990
08212011	22	0.045	0.023	0.028	0.000	0.001	0.001	0.003	0.012	0.010	0.001	0.020	298.782	0.811	NaN	4.527926	0.9338934E-04	1.685602
08212011	23	0.038	0.017	0.020	0.000	0.001	0.001	0.002	0.010	0.011	0.000	0.017	298.338	0.835	NaN	4.150418	0.6793314E-04	1.786010
08212011	24	0.034	0.013	0.014	0.000	0.000	0.001	0.002	0.009	0.006	0.000	0.013	298.016	0.848	NaN	2.924536	0.3704370E-04	1.897343
08222011	01	0.032	0.011	0.010	0.000	0.000	0.000	0.002	0.007	0.002	0.000	0.009	297.684	0.867	NaN	2.228734	0.2747005E-04	1.909199
08222011	02	0.031	0.010	0.008	0.000	0.000	0.000	0.002	0.006	0.000	0.000	0.007	297.392	0.879	NaN	1.796766	0.1923465E-04	1.970407
08222011	03	0.034	0.012	0.008	0.000	0.000	0.000	0.002	0.006	0.000	0.000	0.006	297.176	0.883	NaN	1.546657	0.3471461E-04	1.648882
08222011	04	0.043	0.014	0.004	0.001	0.001	0.000	0.002	0.008	0.000	0.004	0.005	297.022	0.882	NaN	1.730913	0.1565153E-09	7.043718
08222011	05	0.062	0.017	0.000	0.002	0.001	0.001	0.003	0.010	0.000	0.010	0.005	296.907	0.878	NaN	2.516680	0.2260540E-09	7.046616
08222011	06	0.090	0.022	0.000	0.003	0.001	0.002	0.003	0.014	0.000	0.013	0.005	296.771	0.879	NaN	3.350656	0.2995705E-09	7.048631
08222011	07	0.114	0.027	0.000	0.003	0.001	0.003	0.004	0.018	0.000	0.017	0.006	297.188	0.870	NaN	3.867626	0.3495463E-09	7.043940
08222011	08	0.088	0.028	0.000	0.005	0.002	0.003	0.005	0.019	0.012	0.042	0.007	299.351	0.797	NaN	6.314706	0.1097127E-04	2.760096
08222011	09	0.041	0.021	0.017	0.004	0.001	0.002	0.003	0.013	0.026	0.038	0.008	301.261	0.724	NaN	4.712565	0.8776702E-04	1.729926
08222011	10	0.035	0.024	0.045	0.000	0.001	0.001	0.002	0.006	0.003	0.000	0.008	303.393	0.641	NaN	1.814954	0.5978819E-02	-0.5177498
08222011	11	0.021	0.027	0.042	0.000	0.000	0.000	0.001	0.004	0.008	0.000	0.008	305.442	0.552	NaN	0.8903846	0.1884430E-01	-1.325602
08222011	12	0.018	0.021	0.029	0.000	0.000	0.000	0.001	0.003	0.010	0.000	0.009	306.878	0.493	NaN	0.7048994	0.1008550E-01	-1.155570
08222011	13	0.024	0.019	0.022	0.000	0.000	0.000	0.001	0.002	0.010	0.000	0.008	308.123	0.457	NaN	0.6942641	0.2757001E-03	0.4010877
08222011	14	0.035	0.018	0.020	0.000	0.000	0.000	0.001	0.002	0.011	0.000	0.009	308.482	0.439	NaN	0.6674542	0.4467524E-04	1.174355
08222011	15	0.041	0.014	0.018	0.000	0.000	0.000	0.001	0.002	0.013	0.000	0.010	308.000	0.434	NaN	0.6615952	0.3724187E-04	1.249561
08222011	16	0.042	0.010	0.016	0.000	0.000	0.000	0.001	0.002	0.013	0.000	0.010	307.386	0.434	NaN	0.6323214	0.3582691E-04	1.246729
08222011	17	0.046	0.008	0.013	0.000	0.000	0.000	0.001	0.003	0.010	0.000	0.009	306.476	0.438	NaN	0.5056320	0.1804535E-04	1.447469
08222011	18	0.066	0.008	0.012	0.000	0.000	0.001	0.001	0.005	0.004	0.000	0.008	305.339	0.447	NaN	0.3962505	0.2179046E-05	2.259703
08222011	19	0.078	0.010	0.009	0.001	0.001	0.001	0.002	0.010	0.000	0.004	0.008	303.753	0.474	0.000000	0.4438403E-08	0.3771143E-18	7.070754
08222011	20	0.076	0.011	0.000	0.003	0.001	0.001	0.003	0.014	0.000	0.011	0.008	302.308	0.496	NaN	0.9665548	0.7976825E-10	7.083396
08222011	21	0.062	0.008	0.004	0.002	0.001	0.001	0.003	0.013	0.000	0.005	0.008	301.216	0.514	NaN	0.7488768	0.6046769E-10	7.092887
08222011	22	0.049	0.007	0.006	0.001	0.001	0.001	0.003	0.010	0.000	0.000	0.008	300.300	0.535	0.5960464E-07	0.2690894E-08	0.1000276E-13	2.429777
08222011	23	0.036	0.006	0.005	0.001	0.001	0.001	0.002	0.009	0.000	0.000	0.009	299.377	0.565	0.000000	0.1970198E-08	0.1000139E-13	2.294450
08222011	24	0.031	0.006	0.005	0.001	0.001	0.000	0.002	0.009	0.000	0.000	0.009	298.531	0.593	0.000000	0.1665623E-08	0.1000149E-13	2.221512
08232011	01	0.029	0.007	0.005	0.001	0.001	0.000	0.002	0.008	0.000	0.000	0.009	297.596	0.636	0.6541371E-02	0.6131335E-01	0.1551383E-07	3.596836
08232011	02	0.028	0.007	0.005	0.001	0.001	0.000	0.002	0.008	0.000	0.000	0.009	296.960	0.656	0.7854581E-02	0.7074957E-01	0.2079606E-07	3.531743
08232011	03	0.030	0.007	0.005	0.001	0.001	0.000	0.002	0.009	0.000	0.000	0.008	296.476	0.663	0.000000	0.1342382E-08	0.1000179E-13	2.127798
08232011	04	0.037	0.009	0.005	0.001	0.001	0.001	0.003	0.010	0.000	0.000	0.008	296.038	0.666	0.000000	0.1660894E-08	0.1256620E-18	7.121138
08232011	05	0.056	0.014	0.002	0.003	0.001	0.001	0.004	0.013	0.000	0.005	0.008	295.877	0.647	NaN	0.9789988	0.7255310E-10	7.130126
08232011	06	0.079	0.021	0.000	0.004	0.001	0.002	0.005	0.017	0.000	0.008	0.009	295.674	0.637	NaN	1.168871	0.8527912E-10	7.136924
08232011	07	0.093	0.029	0.000	0.004	0.002	0.003	0.006	0.021	0.000	0.011	0.011	295.735	0.646	NaN	1.439476	0.1060118E-09	7.132850
08232011	08	0.079	0.033	0.008	0.004	0.002	0.003	0.006	0.021	0.001	0.017	0.013	297.467	0.586	NaN	2.245478	0.1683351E-09	7.125134
08232011	09	0.048	0.028	0.025	0.001	0.001	0.001	0.004	0.010	0.006	0.001	0.015	299.190	0.523	0.3478467E-02	0.3303105	0.3532872E-05	1.970795
08232011	10	0.025	0.024	0.027	0.000	0.001	0.001	0.002	0.005	0.019	0.000	0.016	300.818	0.474	NaN	1.155819	0.6179780E-03	0.2719169
08232011	11	0.024	0.021	0.027	0.000	0.001	0.000	0.002	0.004	0.022	0.000	0.016	302.265	0.439	NaN	1.004612	0.1516417E-02	-0.1788205
08232011	12	0.026	0.018	0.026	0.000	0.000	0.000	0.001	0.004	0.021	0.000	0.015	303.472	0.409	NaN	0.8408563	0.6661040E-03	0.1011797
08232011	13	0.029	0.016	0.028	0.000	0.000	0.000	0.001	0.004	0.020	0.000	0.015	304.522	0.381	NaN	0.7546218	0.5815168E-03	0.1131671
08232011	14	0.035	0.014	0.031	0.000	0.000	0.000	0.001	0.004	0.017	0.000	0.014	305.088	0.365	NaN	0.7137172	0.1931677E-03	0.5675917
08232011	15	0.041	0.012	0.032	0.000	0.000	0.000	0.001	0.004	0.015	0.000	0.013	304.968	0.362	NaN	0.6496735	0.4585910E-04	1.151270
08232011	16	0.048	0.011	0.032	0.000	0.000	0.001	0.001	0.004	0.013	0.000	0.012	304.505	0.364	NaN	0.6531963	0.1429322E-04	1.659914
08232011	17	0.058	0.011	0.031	0.000	0.000	0.001	0.001	0.005	0.011	0.000	0.012	303.693	0.370	NaN	0.6341993	0.6985747E-05	1.958013
08232011	18	0.072	0.011	0.027	0.000	0.000	0.001	0.002	0.005	0.010	0.000	0.012	302.764	0.377	NaN	0.6065144	0.4224048E-05	2.157112
08232011	19	0.101	0.015	0.024	0.000	0.001	0.001	0.003	0.012	0.001	0.000	0.013	301.365	0.398	NaN	0.3007933	0.1892630E-06	3.201202
08232011	20	0.128	0.019	0.002	0.004	0.001	0.002	0.005	0.022	0.003	0.022	0.013	299.723	0.419	NaN	1.456505	0.1005086E-09	7.161109
08232011	21	0.150	0.019	0.000	0.006	0.001	0.002	0.005	0.023	0.002	0.025	0.014	298.493	0.431	NaN	1.606386	0.3525483E-06	3.658631
08232011	22	0.161	0.019	0.017	0.001	0.001	0.002	0.005	0.020	0.001	0.003	0.014	297.441	0.460	0.5091107E-01	0.3465309E-01	0.7546759E-09	4.661982
08232011	23	0.159	0.019	0.015	0.001	0.001	0.002	0.005	0.019	0.000	0.001	0.014	296.600	0.496	0.000000	0.1919206E-07	0.1280526E-17	7.175733
08232011	24	0.149	0.020	0.014	0.001	0.001	0.002	0.005	0.019	0.000	0.001	0.015	295.896	0.534	0.5960464E-07	0.1587829E-07	0.1069832E-17	7.171488
08242011	01	0.138	0.022	0.012	0.001	0.001	0.002	0.005	0.019	0.001	0.001	0.015	295.221	0.575	0.000000	0.1238156E-07	0.1000416E-13	3.092595
08242011	02	0.125	0.024	0.011	0.001	0.001	0.002	0.006	0.019	0.001	0.001	0.016	294.587	0.621	0.000000	0.8980131E-08	0.6200393E-18	7.160863
08242011	03	0.107	0.025	0.010	0.001	0.001	0.002	0.006	0.019	0.001	0.001	0.016	294.357	0.639	0.000000	0.7073909E-08	0.1000130E-13	2.849603
08242011	04	0.090	0.027	0.009	0.001	0.001	0.002	0.006	0.020	0.001	0.001	0.017	294.185	0.648	0.000000	0.5766275E-08	0.4003210E-18	7.158487
08242011	05	0.088	0.030	0.010	0.001	0.001	0.002	0.007	0.023	0.001	0.001	0.018	293.960	0.669	0.000000	0.5193165E-08	0.3630905E-18	7.155417
08242011	06	0.098	0.034	0.005	0.002	0.001	0.003	0.008	0.026	0.001	0.007	0.019	293.820	0.685	0.8492762E-01	0.7890033E-01	0.8769678E-08	3.954095
08242011	07	0.112	0.040	0.000	0.005	0.002	0.004	0.009	0.032	0.001	0.016	0.020	294.110	0.694	NaN	2.203250	0.1578283E-09	7.144879
08242011	08	0.089	0.040	0.004	0.005	0.002	0.004	0.009	0.030	0.003	0.030	0.020	295.908	0.670	NaN	3.500139	0.2642806E-09	7.122020
08242011	09	0.068	0.041	0.043	0.000	0.001	0.002	0.006	0.018	0.002	0.002	0.019	298.196	0.630	NaN	1.878657	0.1517803E-04	2.092632
08242011	10	0.046	0.071	0.059	0.000	0.001	0.001	0.004	0.011	0.008	0.001	0.018	300.466	0.579	NaN	2.075357	0.1019536E-01	-0.6913098
08242011	11	0.033	0.080	0.082	0.000	0.001	0.001	0.003	0.009	0.014	0.001	0.019	302.542	0.529	NaN	1.551489	0.4874640E-01	-1.497194
08242011	12	0.027	0.075	0.084	0.000	0.001	0.001	0.002	0.007	0.021	0.000	0.020	304.215	0.488	NaN	1.403182	0.5584500E-01	-1.599870
08242011	13	0.031	0.069	0.079	0.000	0.001	0.001	0.002	0.006	0.024	0.000	0.020	305.565	0.461	NaN	1.393130	0.4473253E-01	-1.506632
08242011	14	0.031	0.062	0.079	0.000	0.001	0.001	0.002	0.006	0.025	0.000	0.021	306.248	0.448	NaN	1.376413	0.4549967E-01	-1.519259
08242011	15	0.032	0.052	0.080	0.000	0.001	0.001	0.002	0.007	0.024	0.000	0.020	306.112	0.444	NaN	1.276483	0.4259897E-01	-1.523384
08242011	16	0.033	0.042	0.078	0.000	0.001	0.001	0.002	0.007	0.023	0.000	0.020	305.569	0.446	NaN	1.331758	0.4056724E-01	-1.483750
08242011	17	0.038	0.037	0.074	0.000	0.001	0.001	0.002	0.007	0.021	0.000	0.019	304.703	0.450	NaN	1.359212	0.3113327E-01	-1.359937
08242011	18	0.047	0.035	0.066	0.000	0.001	0.001	0.002	0.008	0.017	0.000	0.019	303.700	0.454	NaN	1.419610	0.1545581E-01	-1.036923
08242011	19	0.073	0.037	0.052	0.000	0.001	0.001	0.004	0.014	0.006	0.000	0.019	302.409	0.464	NaN	1.187104	0.6737347E-05	2.246000
08242011	20	0.094	0.039	0.043	0.000	0.001	0.002	0.006	0.024	0.000	0.000	0.020	300.775	0.490	NaN	0.8926218	0.2411363E-05	2.568405
08242011	21	0.100	0.037	0.043	0.000	0.001	0.002	0.006	0.025	0.000	0.001	0.019	299.558	0.522	NaN	1.065050	0.2772169E-05	2.584550
08242011	22	0.102	0.033	0.041	0.000	0.001	0.002	0.006	0.023	0.000	0.001	0.019	298.586	0.557	NaN	1.233023	0.3233409E-05	2.581311
08242011	23	0.100	0.028	0.034	0.000	0.001	0.002	0.005	0.020	0.000	0.001	0.018	297.786	0.594	NaN	1.181123	0.3320202E-05	2.551131
08242011	24	0.096	0.023	0.025	0.000	0.001	0.002	0.005	0.019	0.000	0.001	0.018	297.071	0.636	NaN	1.103415	0.3550866E-05	2.492404
08252011	01	0.088	0.020	0.017	0.000	0.001	0.002	0.005	0.018	0.000	0.001	0.017	296.447	0.679	NaN	0.9214880	0.3339451E-05	2.440814
08252011	02	0.079	0.020	0.013	0.000	0.001	0.001	0.005	0.018	0.000	0.001	0.017	295.980	0.712	NaN	0.8301567	0.3558283E-05	2.367920
08252011	03	0.068	0.027	0.010	0.001	0.001	0.001	0.005	0.017	0.000	0.001	0.018	295.698	0.732	0.1550359E-01	0.1171170	0.4097561E-07	3.456095
08252011	04	0.067	0.041	0.010	0.000	0.001	0.001	0.006	0.019	0.000	0.001	0.018	295.428	0.762	NaN	0.8529845	0.5028942E-05	2.229465
08252011	05	0.074	0.059	0.010	0.000	0.001	0.002	0.006	0.021	0.000	0.001	0.018	295.205	0.788	NaN	1.024609	0.5949669E-05	2.236065
08252011	06	0.092	0.074	0.007	0.002	0.002	0.003	0.007	0.026	0.001	0.004	0.018	295.038	0.808	NaN	1.908412	0.1529802E-09	7.096037
08252011	07	0.112	0.083	0.000	0.007	0.002	0.004	0.009	0.032	0.001	0.014	0.018	295.332	0.826	NaN	3.595021	0.2947317E-09	7.086275
08252011	08	0.092	0.084	0.000	0.008	0.002	0.004	0.009	0.035	0.003	0.040	0.018	297.389	0.776	NaN	6.618489	0.5692692E-09	7.065441
08252011	09	0.042	0.081	0.037	0.003	0.002	0.002	0.006	0.021	0.009	0.018	0.014	299.497	0.696	NaN	4.195576	0.6615750E-04	1.802213
08252011	10	0.035	0.060	0.066	0.000	0.001	0.001	0.003	0.013	0.000	0.001	0.011	301.769	0.608	NaN	1.294746	0.3200301E-01	-1.393006
08252011	11	0.030	0.040	0.077	0.000	0.001	0.001	0.002	0.009	0.002	0.001	0.012	303.740	0.533	NaN	1.032242	0.4669097E-01	-1.655451
08252011	12	0.025	0.033	0.079	0.000	0.001	0.001	0.002	0.007	0.010	0.000	0.014	305.329	0.483	NaN	0.9660782	0.5255316E-01	-1.735587
08252011	13	0.025	0.026	0.072	0.000	0.001	0.001	0.002	0.006	0.013	0.000	0.015	306.826	0.441	NaN	0.9042289	0.4628827E-01	-1.709193
08252011	14	0.026	0.023	0.067	0.000	0.001	0.001	0.002	0.006	0.014	0.000	0.015	307.622	0.418	NaN	0.8570669	0.3884021E-01	-1.656267
08252011	15	0.026	0.018	0.056	0.000	0.000	0.001	0.002	0.006	0.015	0.000	0.015	307.425	0.420	NaN	0.8385193	0.2654203E-01	-1.500421
08252011	16	0.026	0.013	0.046	0.000	0.000	0.001	0.002	0.005	0.017	0.000	0.015	306.979	0.425	NaN	0.9290081	0.1555980E-01	-1.223985
08252011	17	0.031	0.010	0.038	0.000	0.000	0.001	0.002	0.005	0.018	0.000	0.015	306.068	0.437	NaN	1.060240	0.2562663E-02	-0.3832873
08252011	18	0.046	0.012	0.033	0.000	0.001	0.001	0.002	0.007	0.013	0.000	0.016	304.928	0.456	NaN	1.122171	0.4146801E-04	1.432346
08252011	19	0.078	0.021	0.032	0.000	0.001	0.001	0.004	0.014	0.002	0.000	0.016	303.359	0.486	NaN	0.7010715	0.1628211E-05	2.634052
08252011	20	0.105	0.031	0.033	0.000	0.001	0.002	0.006	0.024	0.000	0.001	0.017	301.842	0.512	NaN	0.7828219	0.2041813E-05	2.583647
08252011	21	0.108	0.035	0.003	0.005	0.001	0.002	0.007	0.026	0.011	0.034	0.017	300.776	0.533	NaN	2.225691	0.2950496E-05	2.877570
08252011	22	0.114	0.035	0.000	0.006	0.001	0.002	0.007	0.026	0.016	0.040	0.017	299.883	0.551	NaN	2.528742	0.3405290E-05	2.870750
08252011	23	0.116	0.033	0.000	0.006	0.001	0.002	0.007	0.026	0.017	0.040	0.017	299.100	0.578	NaN	2.756949	0.3532654E-05	2.892328
08252011	24	0.114	0.030	0.000	0.006	0.001	0.002	0.007	0.025	0.016	0.039	0.017	298.383	0.612	0.2662748E-01	0.5894901E-01	0.7886848E-08	3.873573
08262011	01	0.111	0.027	0.000	0.006	0.001	0.002	0.007	0.025	0.012	0.034	0.016	297.749	0.648	NaN	3.127631	0.3100519E-05	3.003781
08262011	02	0.111	0.023	0.000	0.006	0.001	0.002	0.007	0.025	0.006	0.028	0.016	297.314	0.681	NaN	3.114088	0.1523766E-05	3.310413
08262011	03	0.113	0.023	0.000	0.006	0.001	0.002	0.007	0.025	0.001	0.022	0.016	297.019	0.710	NaN	3.138761	0.2546156E-09	7.090873
08262011	04	0.119	0.025	0.000	0.006	0.001	0.002	0.007	0.026	0.000	0.019	0.016	296.761	0.736	NaN	3.044993	0.2490196E-09	7.087353
08262011	05	0.137	0.030	0.000	0.006	0.001	0.003	0.008	0.028	0.001	0.018	0.017	296.579	0.752	NaN	3.002351	0.2464596E-09	7.085716
08262011	06	0.170	0.037	0.000	0.007	0.002	0.004	0.009	0.034	0.001	0.020	0.017	296.357	0.776	NaN	3.715200	0.3071716E-09	7.082601
08262011	07	0.199	0.045	0.000	0.008	0.002	0.006	0.011	0.042	0.001	0.023	0.018	296.558	0.797	NaN	4.572967	0.3861467E-09	7.073446
08262011	08	0.174	0.047	0.000	0.010	0.002	0.006	0.012	0.045	0.001	0.051	0.018	298.589	0.748	NaN	7.361756	0.6398718E-09	7.060888
08262011	09	0.104	0.063	0.016	0.007	0.002	0.004	0.008	0.030	0.021	0.049	0.018	300.566	0.678	NaN	5.688847	0.1635336E-04	2.541417
08262011	10	0.101	0.088	0.076	0.000	0.001	0.002	0.006	0.021	0.002	0.002	0.018	302.958	0.598	NaN	2.754701	0.4196769E-04	1.817159
08262011	11	0.104	0.110	0.095	0.000	0.001	0.002	0.004	0.014	0.008	0.002	0.021	305.291	0.522	NaN	2.867628	0.6504374E-04	1.644317
08262011	12	0.101	0.104	0.101	0.000	0.001	0.001	0.003	0.011	0.023	0.001	0.025	306.880	0.478	NaN	2.831280	0.5720896E-03	0.6945187
08262011	13	0.083	0.083	0.089	0.000	0.001	0.001	0.003	0.009	0.032	0.000	0.027	308.363	0.440	NaN	2.296580	0.1573604E-02	0.1641860
08262011	14	0.055	0.054	0.073	0.000	0.001	0.001	0.002	0.008	0.044	0.000	0.032	307.589	0.444	NaN	2.194271	0.1011349E-01	-0.6636109
08262011	15	0.048	0.030	0.070	0.000	0.001	0.001	0.003	0.009	0.049	0.000	0.036	307.274	0.447	NaN	2.317065	0.1348651E-01	-0.7649615
08262011	16	0.056	0.011	0.076	0.000	0.001	0.002	0.003	0.010	0.041	0.000	0.033	305.856	0.495	NaN	2.829491	0.1019439E-01	-0.5566528
08262011	17	0.063	0.006	0.084	0.000	0.001	0.001	0.002	0.005	0.037	0.000	0.026	305.445	0.487	NaN	2.647526	0.1444734E-01	-0.7369477
08262011	18	0.070	0.006	0.078	0.000	0.001	0.001	0.001	0.004	0.031	0.000	0.021	304.387	0.477	NaN	2.473471	0.3841634E-02	-0.1912092
08262011	19	0.082	0.008	0.065	0.000	0.001	0.001	0.001	0.003	0.027	0.000	0.019	302.062	0.576	NaN	3.441399	0.1090200E-03	1.499229
08262011	20	0.079	0.009	0.039	0.000	0.001	0.001	0.001	0.003	0.024	0.000	0.016	300.452	0.607	NaN	2.650729	0.3562175E-04	1.871650
08262011	21	0.064	0.010	0.022	0.001	0.001	0.001	0.001	0.002	0.020	0.000	0.013	299.500	0.596	0.8266985E-02	1.008442	0.4308917E-04	1.369283
08262011	22	0.049	0.010	0.011	0.001	0.001	0.001	0.001	0.001	0.017	0.000	0.011	298.760	0.623	0.8787870E-02	0.9736052	0.4419039E-04	1.343055
08262011	23	0.034	0.009	0.007	0.002	0.001	0.000	0.001	0.001	0.017	0.000	0.011	298.288	0.653	0.1143038E-01	0.9943522	0.4426002E-04	1.351529
08262011	24	0.025	0.007	0.006	0.002	0.001	0.000	0.001	0.001	0.018	0.000	0.011	297.897	0.685	0.1364529E-01	1.131548	0.4313168E-04	1.418877
08272011	01	0.022	0.006	0.005	0.002	0.001	0.000	0.001	0.001	0.018	0.000	0.011	297.708	0.713	0.1570582E-01	1.210343	0.4074590E-04	1.472825
08272011	02	0.020	0.005	0.005	0.001	0.001	0.000	0.001	0.001	0.018	0.000	0.011	297.607	0.720	0.1655817E-01	1.253022	0.4039703E-04	1.491609
08272011	03	0.018	0.005	0.005	0.001	0.001	0.000	0.001	0.001	0.017	0.000	0.011	297.494	0.726	0.1708043E-01	1.298618	0.4100808E-04	1.500612
08272011	04	0.015	0.005	0.005	0.001	0.001	0.000	0.001	0.001	0.017	0.000	0.010	296.897	0.777	0.1832920E-01	1.418335	0.4121811E-04	1.536691
08272011	05	0.014	0.005	0.005	0.001	0.001	0.000	0.001	0.001	0.018	0.000	0.011	296.404	0.799	0.2230597E-01	1.720234	0.4920220E-04	1.543603
08272011	06	0.015	0.007	0.006	0.002	0.001	0.001	0.001	0.001	0.024	0.000	0.015	295.911	0.817	0.3040528E-01	2.690571	0.7582804E-04	1.550015
08272011	07	0.020	0.011	0.008	0.002	0.001	0.001	0.002	0.001	0.035	0.001	0.021	295.663	0.839	0.3917611E-01	4.243258	0.1380805E-03	1.487567
08272011	08	0.024	0.015	0.014	0.003	0.002	0.001	0.002	0.002	0.049	0.001	0.029	297.478	0.766	0.2945662E-01	4.130062	0.1901360E-03	1.336892
08272011	09	0.022	0.022	0.023	0.004	0.002	0.001	0.003	0.003	0.062	0.002	0.037	298.815	0.715	0.2441669E-01	4.302020	0.2820006E-03	1.183422
08272011	10	0.022	0.031	0.036	0.002	0.002	0.001	0.003	0.004	0.068	0.002	0.042	300.218	0.663	0.1715326E-01	3.947985	0.2969871E-03	1.123638
08272011	11	0.017	0.051	0.045	0.001	0.002	0.001	0.003	0.006	0.069	0.002	0.045	303.407	0.530	0.9640694E-02	2.764390	0.2081584E-03	1.123206
08272011	12	0.005	0.074	0.035	0.000	0.001	0.001	0.002	0.004	0.063	0.001	0.041	305.528	0.448	0.3364325E-02	2.053356	0.6616336E-02	-0.5081532
08272011	13	0.007	0.056	0.024	0.000	0.001	0.000	0.001	0.003	0.056	0.000	0.033	306.744	0.406	NaN	1.529725	0.1543449E-01	-1.003879
08272011	14	0.014	0.049	0.019	0.000	0.001	0.000	0.001	0.003	0.051	0.000	0.029	307.275	0.382	NaN	1.291854	0.3610366E-02	-0.4463377
08272011	15	0.020	0.047	0.017	0.000	0.001	0.000	0.001	0.003	0.047	0.000	0.027	307.030	0.370	NaN	1.178913	0.1113999E-02	0.2459690E-01
08272011	16	0.027	0.047	0.016	0.000	0.001	0.000	0.001	0.003	0.045	0.000	0.026	306.106	0.361	NaN	1.095757	0.4757200E-03	0.3623627
08272011	17	0.032	0.048	0.016	0.000	0.001	0.001	0.001	0.003	0.046	0.000	0.027	305.266	0.350	NaN	1.139813	0.3055690E-03	0.5717242
08272011	18	0.051	0.050	0.015	0.000	0.001	0.001	0.002	0.005	0.047	0.000	0.030	304.529	0.337	NaN	1.113341	0.1505487E-03	0.8689513
08272011	19	0.081	0.049	0.012	0.001	0.001	0.001	0.003	0.009	0.044	0.000	0.034	302.826	0.358	0.7950544E-02	1.051276	0.5170672E-04	1.308170
08272011	20	0.106	0.046	0.008	0.002	0.002	0.001	0.003	0.012	0.038	0.000	0.035	302.057	0.338	0.8888483E-02	0.9219358	0.4195433E-04	1.341924
08272011	21	0.104	0.041	0.006	0.003	0.002	0.001	0.003	0.010	0.034	0.000	0.030	301.083	0.357	0.9943187E-02	0.8616725	0.3671505E-04	1.370498
08272011	22	0.080	0.039	0.005	0.003	0.002	0.001	0.003	0.007	0.031	0.000	0.026	300.203	0.383	0.1152146E-01	0.8742280	0.3658798E-04	1.378286
08272011	23	0.066	0.041	0.005	0.003	0.002	0.001	0.002	0.007	0.031	0.000	0.025	299.321	0.413	0.1287585E-01	0.9301320	0.4247149E-04	1.340447
08272011	24	0.061	0.046	0.005	0.003	0.002	0.001	0.003	0.007	0.034	0.001	0.027	298.413	0.445	0.1532078E-01	1.136673	0.6001095E-04	1.277405
08282011	01	0.063	0.050	0.005	0.003	0.002	0.001	0.003	0.008	0.037	0.001	0.030	297.472	0.482	0.1865983E-01	1.362246	0.7250850E-04	1.273867
08282011	02	0.064	0.055	0.005	0.003	0.002	0.001	0.003	0.009	0.039	0.001	0.032	296.626	0.519	0.2270913E-01	1.596336	0.8950099E-04	1.251296
08282011	03	0.062	0.059	0.005	0.003	0.002	0.001	0.004	0.010	0.041	0.001	0.035	295.943	0.555	0.3101194E-01	1.922145	0.9364048E-04	1.312322
08282011	04	0.058	0.062	0.006	0.002	0.002	0.001	0.004	0.012	0.043	0.001	0.037	295.317	0.589	0.3916568E-01	2.102779	0.8931160E-04	1.371886
08282011	05	0.059	0.066	0.007	0.002	0.002	0.001	0.005	0.013	0.043	0.002	0.039	294.917	0.619	0.4991549E-01	2.379743	0.8398501E-04	1.452328
08282011	06	0.063	0.069	0.007	0.002	0.002	0.002	0.005	0.015	0.040	0.002	0.040	294.408	0.653	0.6926405E-01	2.588749	0.6008394E-04	1.634332
08282011	07	0.066	0.072	0.009	0.002	0.002	0.002	0.006	0.018	0.038	0.003	0.042	294.227	0.688	0.8752215E-01	2.836920	0.4698616E-04	1.780877
08282011	08	0.061	0.071	0.015	0.002	0.002	0.002	0.006	0.017	0.042	0.004	0.043	295.784	0.661	0.5402261E-01	2.773971	0.6717807E-04	1.615874
08282011	09	0.044	0.073	0.033	0.001	0.002	0.002	0.006	0.014	0.057	0.004	0.046	298.253	0.584	0.2082372E-01	2.639333	0.1547036E-03	1.231994
08282011	10	0.031	0.073	0.051	0.001	0.002	0.002	0.005	0.011	0.065	0.002	0.048	300.730	0.502	0.9320259E-02	2.420130	0.2453866E-03	0.9939879
08282011	11	0.031	0.073	0.057	0.000	0.002	0.001	0.005	0.010	0.065	0.002	0.047	302.895	0.434	NaN	2.374032	0.2254997E-01	-0.9776594
08282011	12	0.039	0.066	0.055	0.000	0.002	0.001	0.005	0.009	0.059	0.001	0.043	304.665	0.389	NaN	1.994284	0.1153271E-01	-0.7621444
08282011	13	0.061	0.063	0.052	0.000	0.002	0.001	0.005	0.010	0.052	0.001	0.040	306.264	0.353	NaN	1.646978	0.2375900E-03	0.8408595
08282011	14	0.083	0.065	0.047	0.000	0.002	0.001	0.005	0.010	0.044	0.001	0.037	307.078	0.332	NaN	1.359072	0.5164921E-04	1.420179
08282011	15	0.094	0.062	0.041	0.000	0.002	0.001	0.005	0.009	0.036	0.001	0.032	306.972	0.324	NaN	1.114040	0.2522114E-04	1.645136
08282011	16	0.101	0.060	0.036	0.000	0.001	0.001	0.005	0.009	0.031	0.001	0.029	306.345	0.324	NaN	0.9542192	0.1593052E-04	1.777418
08282011	17	0.103	0.058	0.032	0.000	0.001	0.001	0.004	0.008	0.030	0.001	0.027	305.454	0.325	NaN	0.9490315	0.1703565E-04	1.745922
08282011	18	0.105	0.056	0.028	0.000	0.001	0.001	0.004	0.009	0.027	0.000	0.026	304.448	0.326	NaN	0.8378677	0.1378471E-04	1.783778
08282011	19	0.129	0.059	0.024	0.000	0.002	0.002	0.006	0.015	0.014	0.000	0.027	302.828	0.345	NaN	0.7104960	0.3454892E-05	2.313127
08282011	20	0.142	0.053	0.019	0.000	0.002	0.002	0.007	0.018	0.007	0.001	0.028	301.090	0.371	NaN	0.6301227	0.1825719E-05	2.537991
08282011	21	0.106	0.039	0.015	0.001	0.002	0.002	0.006	0.014	0.021	0.001	0.030	299.837	0.403	0.7640064E-02	0.7776768	0.2564208E-04	1.481846
08282011	22	0.067	0.031	0.013	0.001	0.002	0.001	0.005	0.011	0.037	0.001	0.034	298.897	0.439	0.1123381E-01	1.224090	0.9412296E-04	1.114118
08282011	23	0.041	0.026	0.013	0.001	0.002	0.001	0.004	0.010	0.045	0.001	0.036	298.111	0.476	0.1433080E-01	1.583396	0.1202609E-03	1.119465
08282011	24	0.031	0.022	0.013	0.001	0.001	0.001	0.004	0.011	0.045	0.001	0.037	297.381	0.515	0.1619023E-01	1.760068	0.1299202E-03	1.131853
08292011	01	0.029	0.018	0.012	0.001	0.001	0.001	0.004	0.012	0.043	0.001	0.037	296.654	0.556	0.1864541E-01	1.902570	0.1379862E-03	1.139505
08292011	02	0.031	0.016	0.010	0.001	0.001	0.001	0.005	0.013	0.038	0.001	0.036	296.031	0.590	0.2025527E-01	1.892293	0.1201045E-03	1.197429
08292011	03	0.036	0.014	0.008	0.001	0.001	0.001	0.005	0.014	0.032	0.001	0.033	295.689	0.604	0.1901263E-01	1.607976	0.8833825E-04	1.260131
08292011	04	0.044	0.015	0.007	0.001	0.001	0.001	0.005	0.015	0.025	0.001	0.031	295.179	0.631	0.2400947E-01	1.490065	0.5447353E-04	1.437020
08292011	05	0.062	0.016	0.007	0.001	0.002	0.001	0.005	0.017	0.017	0.001	0.030	294.768	0.656	0.3716028E-01	1.361409	0.2446424E-04	1.745457
08292011	06	0.089	0.020	0.007	0.001	0.002	0.002	0.006	0.021	0.006	0.001	0.030	294.473	0.672	0.6707776E-01	1.048707	0.3525152E-05	2.473476
08292011	07	0.101	0.023	0.006	0.001	0.002	0.003	0.007	0.024	0.001	0.001	0.029	294.404	0.685	0.1321442	0.5840229	0.2555532E-06	3.358948
08292011	08	0.090	0.023	0.015	0.001	0.002	0.003	0.007	0.024	0.002	0.002	0.029	295.926	0.644	0.6076288E-01	0.4683289	0.3099627E-06	3.179241
08292011	09	0.060	0.028	0.024	0.001	0.002	0.002	0.005	0.015	0.018	0.002	0.028	298.238	0.569	0.1323414E-01	1.085107	0.2441081E-04	1.647890
08292011	10	0.041	0.028	0.037	0.000	0.001	0.001	0.004	0.010	0.032	0.001	0.029	300.380	0.504	NaN	2.023054	0.3486767E-03	0.7635845
08292011	11	0.036	0.027	0.048	0.000	0.001	0.001	0.003	0.008	0.044	0.001	0.033	302.233	0.456	NaN	2.066707	0.9107696E-02	-0.6441296
08292011	12	0.040	0.027	0.052	0.000	0.001	0.001	0.003	0.008	0.046	0.001	0.033	303.795	0.419	NaN	1.851194	0.7052962E-02	-0.5809196
08292011	13	0.036	0.029	0.050	0.000	0.001	0.001	0.003	0.007	0.047	0.001	0.034	305.109	0.386	NaN	1.646279	0.1106063E-01	-0.8272764
08292011	14	0.027	0.028	0.046	0.000	0.001	0.001	0.003	0.007	0.051	0.001	0.035	305.858	0.360	NaN	1.430529	0.1390628E-01	-0.9877144
08292011	15	0.024	0.025	0.042	0.000	0.001	0.001	0.003	0.007	0.053	0.001	0.035	305.773	0.346	NaN	1.363390	0.1130674E-01	-0.9187171
08292011	16	0.029	0.022	0.036	0.000	0.001	0.001	0.003	0.006	0.050	0.000	0.034	305.343	0.336	NaN	1.319292	0.4440715E-02	-0.5271121
08292011	17	0.035	0.019	0.029	0.000	0.001	0.001	0.003	0.006	0.044	0.000	0.030	304.625	0.327	NaN	1.116542	0.3119720E-03	0.5537595
08292011	18	0.045	0.017	0.024	0.000	0.001	0.001	0.003	0.007	0.037	0.000	0.027	303.803	0.319	NaN	0.8951052	0.8340694E-04	1.030672
08292011	19	0.087	0.022	0.024	0.000	0.001	0.001	0.005	0.016	0.014	0.000	0.026	302.237	0.321	NaN	0.5076207	0.3295695E-05	2.187592
08292011	20	0.114	0.024	0.019	0.000	0.001	0.002	0.006	0.023	0.000	0.000	0.025	300.411	0.342	NaN	0.1626967	0.7785117E-08	4.320114
08292011	21	0.105	0.021	0.011	0.001	0.001	0.002	0.006	0.020	0.001	0.001	0.024	299.016	0.373	0.1512223E-01	0.1084152	0.2805650E-07	3.587057
08292011	22	0.087	0.017	0.009	0.001	0.001	0.001	0.005	0.017	0.005	0.001	0.024	298.046	0.406	0.4474044E-02	0.3124574	0.5446140E-05	1.758702
08292011	23	0.067	0.013	0.008	0.001	0.001	0.001	0.005	0.015	0.009	0.001	0.023	297.304	0.439	0.5200028E-02	0.3968528	0.1004374E-04	1.596734
08292011	24	0.053	0.010	0.007	0.001	0.001	0.001	0.004	0.013	0.013	0.001	0.023	296.642	0.472	0.7050514E-02	0.5752292	0.2676539E-04	1.332267
08302011	01	0.050	0.010	0.006	0.001	0.001	0.001	0.004	0.012	0.016	0.001	0.023	296.001	0.506	0.9767175E-02	0.7153433	0.3279297E-04	1.338734
08302011	02	0.055	0.011	0.005	0.001	0.001	0.001	0.004	0.012	0.016	0.001	0.024	295.537	0.540	0.1414973E-01	0.8560882	0.3439356E-04	1.396041
08302011	03	0.072	0.015	0.005	0.001	0.001	0.001	0.005	0.014	0.014	0.001	0.025	295.386	0.570	0.2063912E-01	0.8401512	0.1800872E-04	1.668875
08302011	04	0.092	0.020	0.006	0.002	0.002	0.001	0.005	0.016	0.016	0.001	0.028	295.366	0.603	0.3486711E-01	1.034390	0.1537977E-04	1.827734
08302011	05	0.113	0.030	0.007	0.002	0.002	0.002	0.006	0.017	0.017	0.001	0.031	295.217	0.642	0.6594372E-01	1.431391	0.1096171E-04	2.115880
08302011	06	0.132	0.038	0.008	0.002	0.002	0.002	0.007	0.021	0.014	0.002	0.033	295.026	0.684	0.9416747E-01	1.420551	0.5109197E-05	2.444104
08302011	07	0.137	0.042	0.009	0.002	0.002	0.003	0.008	0.024	0.008	0.003	0.035	295.092	0.725	0.1527482	1.675255	0.2228315E-05	2.876104
08302011	08	0.111	0.037	0.017	0.002	0.002	0.003	0.007	0.022	0.012	0.004	0.034	296.838	0.710	0.7435215E-01	1.671918	0.4946071E-05	2.528955
08302011	09	0.072	0.025	0.025	0.002	0.002	0.002	0.005	0.014	0.028	0.003	0.031	298.880	0.667	0.2971941E-01	1.920989	0.3235817E-04	1.773541
08302011	10	0.045	0.015	0.030	0.001	0.001	0.001	0.003	0.008	0.032	0.001	0.026	300.513	0.629	0.8101702E-02	1.712276	0.1034058E-03	1.219029
08302011	11	0.031	0.013	0.030	0.000	0.001	0.001	0.003	0.006	0.037	0.001	0.026	302.071	0.593	NaN	2.675685	0.6616699E-03	0.6067937
08302011	12	0.030	0.013	0.030	0.000	0.001	0.001	0.003	0.006	0.037	0.001	0.026	303.349	0.562	NaN	2.394090	0.7915722E-03	0.4806499
08302011	13	0.027	0.014	0.030	0.000	0.001	0.001	0.003	0.006	0.041	0.001	0.029	304.353	0.536	NaN	2.366144	0.2262678E-02	0.1941845E-01
08302011	14	0.020	0.016	0.029	0.000	0.001	0.001	0.003	0.006	0.052	0.001	0.034	304.792	0.520	NaN	2.418460	0.5073984E-02	-0.3218101
08302011	15	0.010	0.014	0.028	0.000	0.001	0.001	0.003	0.006	0.063	0.001	0.039	304.582	0.518	NaN	2.553485	0.1122153E-01	-0.6429186
08302011	16	0.011	0.013	0.026	0.000	0.001	0.001	0.003	0.006	0.064	0.001	0.040	304.013	0.528	NaN	2.699636	0.9712636E-02	-0.5560319
08302011	17	0.023	0.013	0.024	0.000	0.001	0.001	0.002	0.006	0.058	0.001	0.037	303.145	0.541	NaN	2.818166	0.2215001E-02	0.1045925
08302011	18	0.051	0.015	0.020	0.000	0.001	0.001	0.003	0.007	0.049	0.001	0.034	302.113	0.555	NaN	2.681372	0.1770418E-03	1.180281
08302011	19	0.091	0.019	0.016	0.000	0.001	0.001	0.004	0.012	0.035	0.001	0.033	300.989	0.570	NaN	2.164888	0.4759910E-04	1.657837
08302011	20	0.130	0.024	0.013	0.001	0.002	0.002	0.006	0.021	0.015	0.001	0.033	299.724	0.597	0.2156216E-01	1.080716	0.8495203E-05	2.104538
08302011	21	0.146	0.025	0.014	0.001	0.002	0.002	0.006	0.023	0.010	0.001	0.033	298.876	0.630	0.3901953E-01	1.013738	0.3903689E-05	2.414450
08302011	22	0.125	0.018	0.012	0.001	0.002	0.002	0.006	0.023	0.012	0.001	0.034	298.373	0.665	0.4071558E-01	1.258209	0.6132527E-05	2.312113
08302011	23	0.083	0.010	0.009	0.001	0.002	0.002	0.006	0.021	0.016	0.001	0.033	298.139	0.679	0.2993655E-01	1.396317	0.1147935E-04	2.085067
08302011	24	0.056	0.007	0.007	0.002	0.002	0.002	0.006	0.019	0.019	0.001	0.033	297.934	0.711	0.2603477E-01	1.775711	0.2413915E-04	1.866650
