# Supplementary material for: Understanding nitrate formation in a world with less sulfate
Source: Copernicus journal article supplement (doi:10.5194/acp-18-12765-2018), 2018-09-05
Supplement: Supplementary file 2 [file acp-18-12765-2018-supplement.zip › DATA/RAW DATA FOR DIURNALS/data_extract_JST_may_mod.csv]

Date	Hour	NH3	SO2	HNO3	CL	NA	MG	K	CA	NH4	NO3	SO4	T	RH	e_NO3	Water	H+	pH
05022011	01	0.019	0.052	0.011	0.003	0.003	0.002	0.006	0.013	0.026	0.002	0.032	291.552	0.754	0.5637586E-01	2.784645	0.8077694E-04	1.537483
05022011	02	0.021	0.037	0.007	0.004	0.003	0.002	0.006	0.013	0.017	0.002	0.027	291.191	0.790	0.7355475E-01	2.440145	0.3474014E-04	1.846584
05022011	03	0.020	0.030	0.006	0.004	0.003	0.002	0.005	0.012	0.012	0.001	0.024	290.869	0.814	0.7124066E-01	2.294306	0.2998933E-04	1.883684
05022011	04	0.021	0.032	0.007	0.004	0.003	0.002	0.005	0.012	0.010	0.001	0.022	290.572	0.829	0.9645247E-01	2.173054	0.1592122E-04	2.135094
05022011	05	0.031	0.041	0.008	0.003	0.003	0.002	0.005	0.014	0.008	0.002	0.022	290.308	0.845	0.1795480	2.149053	0.5747092E-05	2.572799
05022011	06	0.043	0.055	0.010	0.004	0.003	0.002	0.005	0.016	0.005	0.005	0.022	290.020	0.864	0.2846422	2.295697	0.2594021E-05	2.946941
05022011	07	0.050	0.067	0.015	0.003	0.003	0.003	0.006	0.018	0.006	0.006	0.023	290.342	0.880	0.2935449	2.677908	0.3336772E-05	2.904469
05022011	08	0.038	0.061	0.022	0.003	0.003	0.003	0.006	0.018	0.005	0.006	0.023	292.748	0.803	0.9644651E-01	1.152834	0.1968270E-05	2.767682
05022011	09	0.019	0.059	0.034	0.002	0.002	0.002	0.004	0.010	0.016	0.003	0.021	294.820	0.745	0.2135479E-01	1.682989	0.3738204E-04	1.653418
05022011	10	0.014	0.052	0.052	0.001	0.002	0.001	0.003	0.007	0.022	0.002	0.021	296.585	0.701	0.7324934E-02	1.691139	0.1572225E-03	1.031664
05022011	11	0.010	0.028	0.063	0.000	0.002	0.001	0.002	0.006	0.027	0.001	0.022	297.378	0.665	NaN	2.298324	0.5177581E-01	-1.352716
05022011	12	0.005	0.018	0.067	0.000	0.001	0.001	0.002	0.005	0.033	0.001	0.024	299.582	0.611	0.9343505E-02	2.603083	0.4580618E-02	-0.2454360
05022011	13	0.004	0.015	0.069	0.000	0.001	0.001	0.002	0.005	0.035	0.001	0.025	300.031	0.583	0.8074105E-02	2.304806	0.4540307E-02	-0.2944508
05022011	14	0.006	0.016	0.063	0.000	0.001	0.001	0.002	0.005	0.034	0.001	0.024	301.057	0.559	NaN	1.693491	0.5609963E-01	-1.520177
05022011	15	0.012	0.017	0.049	0.000	0.001	0.001	0.002	0.005	0.031	0.001	0.023	299.264	0.569	NaN	1.821684	0.3633047E-01	-1.299798
05022011	16	0.018	0.021	0.035	0.001	0.001	0.001	0.002	0.007	0.028	0.001	0.023	299.979	0.575	0.6101549E-02	1.296100	0.1026361E-03	1.101339
05022011	17	0.014	0.023	0.034	0.001	0.001	0.001	0.002	0.006	0.032	0.001	0.025	298.824	0.578	0.8480370E-02	1.576651	0.1554803E-03	1.006060
05022011	18	0.019	0.026	0.027	0.001	0.002	0.001	0.003	0.009	0.029	0.001	0.027	297.828	0.604	0.9341598E-02	1.581973	0.1291226E-03	1.088197
05022011	19	0.028	0.039	0.022	0.001	0.002	0.002	0.004	0.013	0.022	0.001	0.028	296.900	0.629	0.1177019E-01	1.500284	0.6997397E-04	1.331237
05022011	20	0.036	0.052	0.016	0.002	0.002	0.002	0.005	0.018	0.011	0.001	0.029	295.460	0.656	0.1987803E-01	1.223494	0.2210694E-04	1.743073
05022011	21	0.036	0.061	0.015	0.002	0.002	0.003	0.006	0.019	0.007	0.001	0.029	294.810	0.652	0.3105342E-01	1.143942	0.7945830E-05	2.158265
05022011	22	0.031	0.066	0.013	0.002	0.003	0.002	0.006	0.018	0.009	0.002	0.029	294.259	0.672	0.2727938E-01	1.268792	0.1835005E-04	1.839753
05022011	23	0.024	0.065	0.013	0.002	0.003	0.002	0.006	0.016	0.011	0.002	0.027	293.444	0.712	0.3313303E-01	1.450090	0.2032842E-04	1.853291
05022011	24	0.020	0.053	0.012	0.002	0.003	0.002	0.005	0.014	0.011	0.002	0.025	292.926	0.737	0.3278351E-01	1.611842	0.2834536E-04	1.754840
05032011	01	0.019	0.040	0.010	0.002	0.003	0.002	0.005	0.014	0.010	0.001	0.024	292.494	0.750	0.3815383E-01	1.526918	0.2065731E-04	1.868742
05032011	02	0.021	0.032	0.009	0.002	0.003	0.002	0.005	0.014	0.009	0.001	0.024	292.048	0.765	0.4848820E-01	1.644615	0.1891919E-04	1.939162
05032011	03	0.025	0.029	0.009	0.002	0.003	0.002	0.006	0.015	0.007	0.002	0.024	291.792	0.762	0.6810689E-01	1.457829	0.8634125E-05	2.227489
05032011	04	0.031	0.031	0.009	0.002	0.003	0.002	0.006	0.016	0.005	0.002	0.025	291.372	0.801	0.1020784	1.741621	0.7577093E-05	2.361451
05032011	05	0.038	0.035	0.007	0.003	0.004	0.002	0.007	0.019	0.003	0.003	0.026	291.111	0.824	0.2307127	1.698652	0.1845166E-05	2.964069
05032011	06	0.049	0.043	0.007	0.002	0.004	0.003	0.009	0.023	0.003	0.003	0.026	290.901	0.839	0.1317417	0.7771481	0.4581389E-06	3.229507
05032011	07	0.058	0.051	0.011	0.002	0.004	0.005	0.009	0.027	0.002	0.002	0.027	291.329	0.855	0.000000	0.2172356E-08	0.1545261E-18	7.147929
05032011	08	0.044	0.051	0.018	0.003	0.004	0.004	0.009	0.026	0.003	0.003	0.026	293.898	0.786	0.000000	0.1542470E-08	0.1166094E-18	7.121483
05032011	09	0.025	0.062	0.028	0.002	0.003	0.003	0.006	0.016	0.008	0.004	0.024	295.908	0.722	0.4928505E-01	1.259082	0.3037259E-05	2.617572
05032011	10	0.006	0.086	0.043	0.001	0.002	0.001	0.003	0.008	0.023	0.002	0.022	297.828	0.660	0.5549192E-04	3.127472	0.3883223E-02	-0.9399886E-01
05032011	11	0.002	0.059	0.052	0.001	0.002	0.001	0.002	0.006	0.025	0.001	0.023	299.045	0.619	0.000000	1.576738	0.3049156E-02	-0.2864200
05032011	12	0.001	0.047	0.047	0.001	0.001	0.001	0.002	0.004	0.025	0.001	0.023	299.757	0.591	0.000000	1.397948	0.3643621E-02	-0.4160421
05032011	13	0.001	0.045	0.039	0.001	0.001	0.001	0.001	0.003	0.024	0.000	0.021	301.250	0.557	0.000000	1.207870	0.3534066E-02	-0.4662544
05032011	14	0.001	0.032	0.031	0.001	0.001	0.001	0.001	0.002	0.023	0.000	0.022	297.915	0.706	0.000000	2.280699	0.3068406E-02	-0.1288447
05032011	15	0.001	0.030	0.029	0.001	0.001	0.001	0.001	0.001	0.030	0.000	0.024	296.259	0.759	0.000000	3.118484	0.4229969E-02	-0.1323937
05032011	16	0.002	0.043	0.028	0.001	0.001	0.001	0.001	0.002	0.040	0.000	0.028	294.818	0.770	0.000000	3.815009	0.4214337E-02	-0.4323375E-01
05032011	17	0.003	0.062	0.029	0.001	0.001	0.001	0.001	0.003	0.054	0.000	0.034	291.956	0.813	0.000000	5.597437	0.3185513E-02	0.2448098
05032011	18	0.006	0.071	0.028	0.001	0.002	0.001	0.001	0.004	0.064	0.002	0.038	289.612	0.849	0.7224375E-01	7.785143	0.5926215E-03	1.118489
05032011	19	0.006	0.064	0.023	0.001	0.002	0.001	0.002	0.004	0.064	0.003	0.038	287.285	0.895	0.1607108	11.87886	0.4950144E-03	1.380157
05032011	20	0.004	0.048	0.017	0.001	0.002	0.001	0.001	0.003	0.044	0.002	0.026	285.759	0.919	0.1818477	10.22948	0.3117700E-03	1.516019
05032011	21	0.005	0.023	0.010	0.001	0.001	0.001	0.001	0.001	0.023	0.001	0.014	285.060	0.913	0.1275119	5.014228	0.1363140E-03	1.565663
05032011	22	0.006	0.015	0.007	0.000	0.001	0.000	0.000	0.001	0.013	0.001	0.008	284.535	0.915	NaN	4.659877	0.1195034E-02	0.5909939
05032011	23	0.006	0.017	0.006	0.000	0.001	0.000	0.000	0.000	0.007	0.001	0.004	284.066	0.914	0.6178355E-01	1.557576	0.3648250E-04	1.630365
05032011	24	0.005	0.017	0.007	0.000	0.001	0.000	0.000	0.000	0.006	0.001	0.004	283.604	0.909	0.4555804E-01	1.529181	0.5268718E-04	1.462754
05042011	01	0.005	0.017	0.010	0.000	0.001	0.000	0.000	0.000	0.010	0.001	0.006	283.137	0.906	0.6768334E-01	2.342771	0.8519695E-04	1.439306
05042011	02	0.003	0.018	0.014	0.000	0.001	0.000	0.001	0.000	0.020	0.002	0.011	282.632	0.912	NaN	4.813879	0.9846685E-02	-0.3107949
05042011	03	0.001	0.021	0.018	0.001	0.001	0.000	0.001	0.001	0.029	0.002	0.017	282.334	0.910	0.2020597E-03	5.812346	0.1236504E-02	0.6721560
05042011	04	0.001	0.031	0.022	0.001	0.002	0.000	0.001	0.003	0.038	0.000	0.026	282.253	0.894	0.000000	6.782208	0.2635117E-02	0.4105712
05042011	05	0.001	0.029	0.026	0.001	0.002	0.001	0.002	0.004	0.051	0.000	0.035	282.123	0.887	0.000000	9.169467	0.2780505E-02	0.5182204
05042011	06	0.000	0.034	0.031	0.001	0.002	0.001	0.002	0.005	0.061	0.001	0.048	282.013	0.881	0.000000	11.33348	0.9229462E-02	0.8918670E-01
05042011	07	0.000	0.049	0.037	0.000	0.002	0.001	0.003	0.007	0.068	0.001	0.057	281.946	0.871	0.2033430E-01	12.25290	0.1301430E-01	-0.2618191E-01
05042011	08	0.000	0.068	0.036	0.000	0.002	0.001	0.003	0.008	0.069	0.001	0.060	282.425	0.841	0.1163781E-01	10.48363	0.1565232E-01	-0.1740670
05042011	09	0.000	0.090	0.042	0.000	0.001	0.001	0.003	0.007	0.066	0.001	0.063	283.983	0.762	0.2607465E-02	7.769292	0.3006694E-01	-0.5877079
05042011	10	0.000	0.089	0.054	0.000	0.001	0.001	0.003	0.006	0.067	0.001	0.067	287.203	0.630	0.6280541E-03	5.140183	0.4625174E-01	-0.9541494
05042011	11	0.000	0.065	0.065	0.000	0.001	0.001	0.002	0.005	0.062	0.001	0.064	289.438	0.539	0.8255243E-04	3.637669	0.2966923E-02	0.8851699E-01
05042011	12	0.000	0.056	0.065	0.000	0.001	0.001	0.002	0.005	0.057	0.000	0.058	290.903	0.491	0.4786253E-04	2.713592	0.1902567E-02	0.1542046
05042011	13	0.000	0.053	0.064	0.000	0.001	0.001	0.002	0.005	0.056	0.000	0.054	292.216	0.446	0.3415346E-04	2.136709	0.2194951E-02	-0.1167945E-01
05042011	14	0.000	0.051	0.061	0.000	0.001	0.001	0.002	0.005	0.056	0.000	0.051	292.977	0.411	0.7057190E-04	1.697019	0.3078621E-01	-1.258669
05042011	15	0.000	0.046	0.052	0.000	0.001	0.001	0.002	0.005	0.054	0.000	0.044	292.650	0.409	0.1262426E-03	1.405863	0.1888241E-01	-1.128114
05042011	16	0.001	0.042	0.044	0.000	0.001	0.001	0.002	0.004	0.049	0.000	0.035	291.970	0.417	0.6290078E-03	1.388960	0.7215525E-02	-0.7155783
05042011	17	0.004	0.040	0.035	0.000	0.001	0.001	0.002	0.004	0.043	0.000	0.028	290.944	0.429	0.1741719E-01	1.701413	0.2989598E-02	-0.2448030
05042011	18	0.011	0.040	0.028	0.000	0.001	0.001	0.002	0.004	0.036	0.001	0.024	289.774	0.437	NaN	1.293324	0.1645221E-01	-1.104517
05042011	19	0.017	0.042	0.023	0.000	0.001	0.001	0.002	0.005	0.033	0.001	0.023	288.766	0.445	NaN	1.341273	0.4538641E-02	-0.5294088
05042011	20	0.034	0.049	0.018	0.000	0.001	0.001	0.003	0.008	0.028	0.001	0.024	287.490	0.468	NaN	1.303901	0.3675049E-04	1.549981
05042011	21	0.048	0.052	0.018	0.001	0.001	0.001	0.004	0.011	0.023	0.002	0.026	286.439	0.495	0.1227928	1.005150	0.2392961E-04	1.623295
05042011	22	0.045	0.049	0.018	0.001	0.002	0.001	0.004	0.012	0.028	0.003	0.028	285.514	0.522	0.1782877	1.187970	0.2169202E-04	1.738505
05042011	23	0.033	0.048	0.015	0.001	0.002	0.001	0.004	0.011	0.040	0.006	0.032	284.628	0.551	0.2263446	1.701850	0.3790693E-04	1.652203
05042011	24	0.022	0.049	0.013	0.001	0.002	0.001	0.004	0.011	0.053	0.006	0.037	283.806	0.578	0.2668145	2.281190	0.6138648E-04	1.570089
05052011	01	0.015	0.050	0.013	0.001	0.002	0.001	0.004	0.010	0.061	0.006	0.041	282.866	0.610	0.2781522	2.950454	0.1075124E-03	1.438430
05052011	02	0.011	0.050	0.013	0.001	0.002	0.001	0.004	0.009	0.066	0.006	0.043	282.125	0.639	0.2809682	3.528603	0.1575779E-03	1.350107
05052011	03	0.008	0.046	0.013	0.001	0.002	0.001	0.004	0.009	0.066	0.005	0.043	281.580	0.666	0.2775604	3.869637	0.1897036E-03	1.309595
05052011	04	0.009	0.039	0.011	0.001	0.002	0.001	0.004	0.009	0.065	0.006	0.042	281.166	0.691	0.3383062	4.068753	0.1504623E-03	1.432034
05052011	05	0.013	0.032	0.009	0.001	0.002	0.001	0.004	0.009	0.063	0.009	0.040	280.799	0.715	0.4541416	4.429331	0.9373238E-04	1.674448
05052011	06	0.021	0.029	0.008	0.001	0.002	0.001	0.004	0.010	0.060	0.014	0.037	280.474	0.740	0.6036147	4.616044	0.4385571E-04	2.022244
05052011	07	0.023	0.028	0.009	0.002	0.002	0.002	0.004	0.011	0.060	0.018	0.036	280.685	0.753	0.6483566	4.943396	0.3086158E-04	2.204607
05052011	08	0.013	0.027	0.017	0.001	0.001	0.001	0.004	0.010	0.060	0.016	0.036	282.575	0.697	0.3496935	3.710104	0.7160911E-04	1.714418
05052011	09	0.006	0.033	0.035	0.000	0.001	0.001	0.003	0.009	0.059	0.009	0.037	284.890	0.619	NaN	3.150476	0.2768266E-01	-0.9438315
05052011	10	0.005	0.034	0.048	0.000	0.001	0.001	0.003	0.008	0.057	0.004	0.037	287.067	0.547	NaN	2.446008	0.4139742E-01	-1.228515
05052011	11	0.002	0.033	0.064	0.000	0.001	0.001	0.003	0.008	0.057	0.000	0.037	288.974	0.495	0.2255237E-01	2.775540	0.3619483E-02	-0.1152990
05052011	12	0.008	0.034	0.080	0.000	0.001	0.001	0.003	0.008	0.053	0.002	0.037	290.821	0.445	NaN	1.768078	0.7288188E-01	-1.615118
05052011	13	0.003	0.031	0.093	0.000	0.001	0.001	0.003	0.008	0.054	0.000	0.035	292.356	0.408	NaN	1.451356	0.8398356E-01	-1.762420
05052011	14	0.003	0.031	0.108	0.000	0.001	0.001	0.003	0.007	0.053	0.000	0.035	293.344	0.388	0.9525418E-02	1.851605	0.3973848E-02	-0.3316630
05052011	15	0.003	0.034	0.124	0.000	0.001	0.001	0.003	0.008	0.056	0.000	0.037	293.293	0.396	0.9830177E-02	2.054357	0.4218566E-02	-0.3124889
05052011	16	0.003	0.039	0.132	0.000	0.001	0.001	0.003	0.008	0.057	0.000	0.039	292.972	0.410	0.9020567E-02	1.924547	0.3964287E-02	-0.3138365
05052011	17	0.002	0.047	0.124	0.000	0.001	0.001	0.003	0.007	0.056	0.000	0.040	292.272	0.430	0.3601491E-02	1.672648	0.4045088E-02	-0.3835235
05052011	18	0.001	0.059	0.108	0.000	0.001	0.001	0.003	0.007	0.056	0.000	0.043	291.391	0.452	0.7489920E-03	1.729394	0.8920964E-02	-0.7125179
05052011	19	0.000	0.069	0.086	0.000	0.001	0.001	0.003	0.008	0.061	0.000	0.051	290.347	0.476	0.3725290E-03	2.018133	0.1850981E-01	-0.9624521
05052011	20	0.002	0.089	0.063	0.000	0.001	0.002	0.004	0.013	0.081	0.000	0.063	288.930	0.512	0.4123628E-02	3.099376	0.7961714E-02	-0.4097323
05052011	21	0.002	0.114	0.076	0.000	0.002	0.002	0.005	0.018	0.099	0.001	0.076	287.607	0.557	0.1635432E-01	4.353273	0.5865680E-02	-0.1295025
05052011	22	0.001	0.143	0.111	0.000	0.002	0.002	0.006	0.019	0.108	0.001	0.089	286.548	0.606	0.5389094E-02	5.620484	0.1694384E-01	-0.4792382
05052011	23	0.000	0.172	0.155	0.000	0.002	0.002	0.006	0.019	0.108	0.001	0.100	285.773	0.647	0.2568245E-02	7.027149	0.3782483E-01	-0.7309979
05052011	24	0.000	0.194	0.201	0.000	0.002	0.002	0.006	0.020	0.106	0.001	0.106	285.044	0.692	0.2709210E-02	8.853783	0.4734303E-01	-0.7281272
05062011	01	0.000	0.204	0.237	0.000	0.002	0.002	0.006	0.020	0.105	0.001	0.107	284.322	0.749	0.4148185E-02	11.47373	0.4353815E-01	-0.5791653
05062011	02	0.000	0.202	0.255	0.000	0.002	0.002	0.006	0.022	0.105	0.002	0.106	283.834	0.791	0.6942928E-02	13.17171	0.3319437E-01	-0.4014221
05062011	03	0.000	0.196	0.268	0.000	0.002	0.002	0.007	0.023	0.107	0.003	0.104	283.547	0.814	0.1092875E-01	13.81246	0.2703081E-01	-0.2915881
05062011	04	0.000	0.192	0.279	0.000	0.002	0.002	0.007	0.026	0.115	0.008	0.101	283.343	0.829	0.2470082E-01	14.40839	0.1944648E-01	-0.1302256
05062011	05	0.000	0.195	0.275	0.000	0.002	0.003	0.008	0.029	0.134	0.021	0.099	283.174	0.842	0.6525695E-01	19.02268	0.1978047E-01	-0.1696487E-01
05062011	06	0.001	0.208	0.230	0.001	0.002	0.004	0.010	0.036	0.168	0.064	0.098	283.072	0.853	0.2284948	23.16039	0.1898239E-02	1.086395
05062011	07	0.002	0.221	0.159	0.001	0.003	0.006	0.012	0.044	0.202	0.116	0.100	283.828	0.851	0.4266832	29.47909	0.8709915E-03	1.529500
05062011	08	0.002	0.212	0.201	0.001	0.003	0.005	0.010	0.037	0.177	0.076	0.099	286.184	0.752	0.2615415	14.10317	0.5033552E-03	1.447442
05062011	09	0.001	0.247	0.222	0.000	0.002	0.003	0.007	0.023	0.123	0.008	0.092	288.655	0.642	0.2578557E-01	6.952322	0.7616962E-02	-0.3965193E-01
05062011	10	0.000	0.357	0.183	0.000	0.002	0.002	0.005	0.015	0.090	0.001	0.087	290.646	0.554	0.5033016E-03	4.434385	0.4042098E-01	-0.9597734
05062011	11	0.000	0.288	0.145	0.000	0.002	0.001	0.004	0.011	0.073	0.000	0.079	292.194	0.499	0.7122755E-04	3.580124	0.2601173E-02	0.1387288
05062011	12	0.000	0.199	0.125	0.000	0.002	0.001	0.003	0.009	0.065	0.000	0.071	293.315	0.451	0.3159046E-04	2.739409	0.1305983E-02	0.3217195
05062011	13	0.000	0.142	0.108	0.000	0.001	0.001	0.003	0.008	0.060	0.000	0.061	295.117	0.405	0.2264977E-04	1.959492	0.1335119E-02	0.1666235
05062011	14	0.000	0.095	0.077	0.000	0.001	0.001	0.003	0.007	0.051	0.000	0.046	295.714	0.382	0.4887581E-04	1.248238	0.2080058E-01	-1.221778
05062011	15	0.001	0.068	0.056	0.000	0.001	0.001	0.003	0.007	0.046	0.000	0.036	294.863	0.390	0.5097389E-03	1.199919	0.5638830E-02	-0.6720372
05062011	16	0.006	0.063	0.052	0.000	0.001	0.001	0.003	0.008	0.047	0.000	0.034	294.053	0.409	0.1360834E-01	1.973711	0.3946183E-02	-0.3008937
05062011	17	0.012	0.067	0.052	0.000	0.001	0.001	0.003	0.009	0.046	0.000	0.035	294.857	0.420	NaN	1.491760	0.3939946E-01	-1.421791
05062011	18	0.003	0.063	0.044	0.000	0.001	0.001	0.003	0.008	0.048	0.000	0.034	293.956	0.439	0.1426280E-01	1.948267	0.3699743E-02	-0.2785231
05062011	19	0.027	0.054	0.029	0.000	0.001	0.002	0.004	0.012	0.033	0.001	0.032	292.783	0.482	NaN	1.808150	0.1238520E-02	0.1643314
05062011	20	0.070	0.062	0.026	0.000	0.002	0.003	0.007	0.023	0.006	0.002	0.031	290.341	0.522	NaN	1.279753	0.2420926E-05	2.723145
05062011	21	0.079	0.070	0.034	0.000	0.002	0.003	0.007	0.025	0.003	0.002	0.029	288.957	0.549	NaN	1.167692	0.1274031E-05	2.962148
05062011	22	0.076	0.070	0.041	0.000	0.002	0.003	0.007	0.024	0.003	0.002	0.027	287.684	0.602	NaN	1.651946	0.2221332E-05	2.871382
05062011	23	0.071	0.068	0.043	0.000	0.002	0.003	0.007	0.023	0.004	0.004	0.026	286.710	0.645	NaN	2.281354	0.4411189E-05	2.713637
05062011	24	0.066	0.067	0.039	0.000	0.002	0.003	0.007	0.021	0.009	0.009	0.026	285.780	0.700	NaN	3.258947	0.7527426E-05	2.636431
05072011	01	0.059	0.069	0.033	0.001	0.002	0.002	0.006	0.020	0.015	0.014	0.025	284.916	0.763	0.4709998	2.489836	0.2924237E-05	2.930158
05072011	02	0.047	0.073	0.026	0.001	0.002	0.002	0.006	0.019	0.024	0.022	0.025	284.327	0.805	0.5912182	4.211919	0.5854690E-05	2.856976
05072011	03	0.036	0.077	0.022	0.001	0.002	0.002	0.006	0.017	0.033	0.027	0.025	283.973	0.825	0.6162062	5.428876	0.1009678E-04	2.730527
05072011	04	0.032	0.080	0.021	0.001	0.002	0.002	0.006	0.017	0.037	0.030	0.025	283.688	0.839	0.6445769	6.191910	0.1210723E-04	2.708780
05072011	05	0.032	0.082	0.019	0.002	0.002	0.002	0.006	0.017	0.041	0.034	0.025	283.490	0.851	0.6898960	7.331025	0.1402530E-04	2.718252
05072011	06	0.037	0.085	0.016	0.002	0.002	0.002	0.006	0.019	0.044	0.041	0.025	283.457	0.855	0.7577621	8.577304	0.1380193E-04	2.793411
05072011	07	0.042	0.090	0.016	0.003	0.002	0.003	0.007	0.022	0.052	0.050	0.026	284.383	0.856	0.7480984	9.128713	0.1582390E-04	2.761096
05072011	08	0.050	0.085	0.033	0.002	0.002	0.003	0.008	0.024	0.045	0.044	0.026	287.889	0.754	0.3234385	2.085071	0.2594143E-05	2.905127
05072011	09	0.041	0.078	0.059	0.000	0.002	0.002	0.005	0.015	0.020	0.011	0.024	290.863	0.630	NaN	3.103417	0.1353256E-01	-0.6395398
05072011	10	0.026	0.112	0.066	0.000	0.001	0.001	0.004	0.011	0.024	0.004	0.025	293.343	0.527	NaN	1.707901	0.4027276E-01	-1.372549
05072011	11	0.016	0.113	0.071	0.000	0.001	0.001	0.003	0.008	0.027	0.001	0.025	294.702	0.492	NaN	1.382239	0.5678725E-01	-1.613668
05072011	12	0.010	0.113	0.089	0.000	0.001	0.001	0.003	0.008	0.032	0.001	0.026	296.434	0.448	NaN	1.206539	0.7797550E-01	-1.810417
05072011	13	0.003	0.115	0.109	0.000	0.001	0.001	0.003	0.008	0.040	0.000	0.030	298.119	0.406	0.5598903E-02	1.580398	0.4295213E-02	-0.4342183
05072011	14	0.003	0.119	0.117	0.000	0.001	0.001	0.003	0.008	0.042	0.000	0.033	299.092	0.382	0.3900826E-02	1.212266	0.4012513E-02	-0.5198186
05072011	15	0.002	0.118	0.108	0.000	0.001	0.001	0.003	0.008	0.045	0.000	0.036	299.019	0.380	0.5871058E-03	1.171268	0.4752850E-02	-0.6082979
05072011	16	0.002	0.117	0.091	0.000	0.001	0.001	0.003	0.008	0.045	0.000	0.036	298.584	0.385	0.6965995E-03	1.211746	0.4661777E-02	-0.5851400
05072011	17	0.004	0.115	0.068	0.000	0.001	0.001	0.003	0.007	0.043	0.000	0.033	297.680	0.397	0.6147146E-02	1.340412	0.3797376E-02	-0.4522453
05072011	18	0.010	0.124	0.046	0.000	0.001	0.001	0.003	0.008	0.039	0.001	0.030	296.584	0.411	NaN	1.231239	0.3537728E-01	-1.458382
05072011	19	0.035	0.146	0.027	0.001	0.001	0.002	0.003	0.010	0.032	0.001	0.030	295.130	0.446	0.1210374E-01	1.172049	0.1156266E-03	1.005888
05072011	20	0.063	0.176	0.018	0.001	0.002	0.002	0.005	0.015	0.024	0.001	0.031	292.802	0.496	0.4219323E-01	1.085450	0.2706986E-04	1.603124
05072011	21	0.067	0.209	0.021	0.001	0.002	0.003	0.005	0.017	0.026	0.002	0.035	291.298	0.519	0.8119196E-01	1.373236	0.2250147E-04	1.785534
05072011	22	0.058	0.240	0.028	0.001	0.002	0.003	0.005	0.017	0.037	0.003	0.040	289.814	0.585	0.1495270	2.196189	0.3309499E-04	1.821907
05072011	23	0.044	0.262	0.039	0.001	0.002	0.002	0.005	0.016	0.050	0.005	0.045	288.848	0.626	0.1769507	3.101519	0.6483211E-04	1.679784
05072011	24	0.032	0.274	0.055	0.000	0.002	0.002	0.005	0.016	0.060	0.008	0.047	287.820	0.684	NaN	5.570083	0.1792809E-01	-0.5076724
05082011	01	0.022	0.275	0.070	0.000	0.002	0.002	0.005	0.016	0.068	0.012	0.049	286.901	0.757	NaN	7.576016	0.4143999E-01	-0.7379787
05082011	02	0.015	0.267	0.081	0.001	0.002	0.002	0.005	0.016	0.073	0.017	0.049	286.327	0.806	0.2404847	8.476254	0.2020145E-03	1.622821
05082011	03	0.012	0.255	0.089	0.001	0.002	0.002	0.005	0.016	0.075	0.021	0.048	286.110	0.820	0.2366179	9.044597	0.2221351E-03	1.609772
05082011	04	0.013	0.241	0.090	0.001	0.002	0.002	0.005	0.017	0.076	0.026	0.047	286.014	0.825	0.2720965	9.887273	0.1952825E-03	1.704413
05082011	05	0.017	0.223	0.076	0.001	0.002	0.002	0.006	0.018	0.076	0.034	0.044	285.943	0.833	0.3687331	10.21891	0.1147455E-03	1.949669
05082011	06	0.027	0.201	0.049	0.002	0.002	0.003	0.006	0.020	0.073	0.041	0.042	285.856	0.850	0.5496453	12.28177	0.6513202E-04	2.275466
05082011	07	0.038	0.183	0.027	0.003	0.003	0.003	0.007	0.022	0.059	0.038	0.039	286.895	0.870	0.6445943	12.00879	0.3177259E-04	2.577447
05082011	08	0.046	0.173	0.027	0.002	0.003	0.004	0.008	0.024	0.036	0.023	0.039	290.657	0.759	0.2506077	3.349361	0.9602682E-05	2.542569
05082011	09	0.011	0.257	0.060	0.001	0.004	0.003	0.006	0.017	0.064	0.006	0.052	293.558	0.690	0.4439920E-01	4.254600	0.2517085E-03	1.227961
05082011	10	0.003	0.260	0.091	0.000	0.003	0.002	0.005	0.014	0.087	0.003	0.065	295.898	0.638	0.1851273E-01	5.012481	0.5536455E-02	-0.4317901E-01
05082011	11	0.002	0.202	0.108	0.000	0.003	0.002	0.004	0.011	0.094	0.002	0.069	297.703	0.607	0.3616035E-02	4.938138	0.7933880E-02	-0.2059224
05082011	12	0.002	0.129	0.093	0.000	0.002	0.001	0.004	0.009	0.084	0.001	0.064	299.296	0.580	0.8167624E-03	3.948017	0.1017474E-01	-0.4111445
05082011	13	0.001	0.103	0.078	0.000	0.002	0.001	0.003	0.009	0.079	0.001	0.065	300.784	0.555	0.2223849E-03	3.503497	0.1098539E-01	-0.4963137
05082011	14	0.001	0.102	0.070	0.000	0.002	0.001	0.003	0.009	0.077	0.001	0.064	301.580	0.542	0.1662970E-03	3.190778	0.9691770E-02	-0.4825065
05082011	15	0.001	0.090	0.057	0.000	0.002	0.001	0.003	0.008	0.073	0.001	0.061	301.485	0.539	0.1489520E-03	3.057408	0.8794651E-02	-0.4588653
05082011	16	0.001	0.089	0.056	0.000	0.002	0.001	0.003	0.009	0.078	0.001	0.065	300.475	0.556	0.2006292E-03	3.471191	0.1137890E-01	-0.5156219
05082011	17	0.001	0.082	0.055	0.000	0.002	0.002	0.004	0.010	0.083	0.001	0.074	299.978	0.576	0.2733469E-03	4.364140	0.8122414E-02	-0.2697865
05082011	18	0.001	0.061	0.047	0.000	0.002	0.002	0.004	0.011	0.086	0.001	0.081	298.902	0.604	0.3083348E-03	5.193876	0.7836506E-02	-0.1786309
05082011	19	0.003	0.065	0.041	0.000	0.003	0.003	0.005	0.016	0.112	0.001	0.091	297.297	0.650	0.2669096E-02	6.967770	0.1137370E-01	-0.2128079
05082011	20	0.006	0.068	0.041	0.001	0.003	0.003	0.007	0.021	0.136	0.002	0.097	295.291	0.693	0.7566214E-03	10.07381	0.5982636E-02	0.2263012
05082011	21	0.004	0.065	0.048	0.001	0.003	0.003	0.006	0.019	0.136	0.002	0.099	293.808	0.738	0.000000	10.75176	0.6403924E-02	0.2250333
05082011	22	0.002	0.057	0.048	0.001	0.003	0.003	0.005	0.015	0.129	0.001	0.096	292.909	0.765	0.000000	11.90158	0.9682009E-02	0.8963905E-01
05082011	23	0.002	0.052	0.043	0.001	0.002	0.002	0.005	0.014	0.119	0.001	0.088	292.233	0.799	0.000000	12.35308	0.8831099E-02	0.1457606
05082011	24	0.003	0.051	0.036	0.001	0.002	0.002	0.004	0.013	0.104	0.002	0.075	291.497	0.848	0.000000	13.72931	0.5549489E-02	0.3933957
05092011	01	0.003	0.044	0.028	0.001	0.002	0.001	0.004	0.012	0.091	0.003	0.061	290.940	0.884	0.9948015E-03	15.68794	0.3938049E-02	0.6002848
05092011	02	0.007	0.039	0.025	0.002	0.002	0.001	0.004	0.012	0.076	0.003	0.050	290.572	0.900	0.1817449	13.48362	0.3326261E-03	1.607850
05092011	03	0.015	0.039	0.025	0.002	0.001	0.001	0.004	0.012	0.061	0.005	0.042	290.349	0.903	0.2351215	11.46123	0.1641548E-03	1.843978
05092011	04	0.023	0.042	0.027	0.003	0.001	0.001	0.004	0.013	0.054	0.008	0.038	290.232	0.900	0.3053757	10.83829	0.9270154E-04	2.067874
05092011	05	0.039	0.049	0.026	0.003	0.001	0.001	0.004	0.016	0.049	0.013	0.037	290.160	0.896	0.4235376	11.07339	0.5117157E-04	2.335252
05092011	06	0.071	0.060	0.020	0.004	0.002	0.002	0.005	0.020	0.042	0.017	0.036	290.146	0.894	0.5738387	9.792988	0.1884803E-04	2.715649
05092011	07	0.104	0.071	0.016	0.004	0.002	0.004	0.007	0.027	0.033	0.024	0.037	291.076	0.894	0.6562852	9.209741	0.8264935E-05	3.047008
05092011	08	0.097	0.065	0.038	0.002	0.002	0.005	0.009	0.033	0.019	0.018	0.037	294.907	0.801	0.9705019E-01	1.156995	0.8672845E-06	3.125170
05092011	09	0.052	0.050	0.052	0.001	0.002	0.004	0.007	0.027	0.016	0.006	0.037	297.234	0.710	0.5348575E-01	1.580300	0.3352893E-05	2.673320
05092011	10	0.005	0.057	0.075	0.000	0.001	0.002	0.004	0.011	0.047	0.001	0.038	298.973	0.641	0.1450312E-01	4.030403	0.5244029E-02	-0.1143166
05092011	11	0.003	0.055	0.100	0.000	0.001	0.001	0.003	0.009	0.045	0.001	0.038	300.682	0.581	0.1410186E-02	2.235049	0.4993190E-02	-0.3490911
05092011	12	0.001	0.061	0.112	0.000	0.001	0.001	0.002	0.007	0.041	0.000	0.040	302.244	0.529	0.7629395E-04	1.896611	0.3088010E-02	-0.2117004
05092011	13	0.001	0.061	0.113	0.000	0.001	0.001	0.002	0.006	0.042	0.001	0.044	303.481	0.488	0.3755093E-04	1.935974	0.1633318E-02	0.7382880E-01
05092011	14	0.000	0.052	0.101	0.000	0.001	0.001	0.002	0.006	0.043	0.001	0.050	303.969	0.470	0.1358986E-04	2.133981	0.9179458E-03	0.3663735
05092011	15	0.000	0.040	0.093	0.000	0.001	0.001	0.002	0.006	0.043	0.001	0.055	303.716	0.474	0.2145767E-05	2.560108	0.1851895E-02	0.1406419
05092011	16	0.000	0.029	0.086	0.000	0.001	0.001	0.002	0.006	0.043	0.000	0.058	303.198	0.489	0.1907349E-05	3.128968	0.4647104E-02	-0.1717813
05092011	17	0.000	0.026	0.078	0.000	0.001	0.001	0.002	0.006	0.044	0.000	0.059	302.161	0.513	0.3099442E-05	3.398443	0.4831402E-02	-0.1527932
05092011	18	0.001	0.030	0.070	0.000	0.001	0.001	0.003	0.008	0.054	0.000	0.063	301.006	0.541	0.4422665E-04	3.402295	0.1655268E-02	0.3129036
05092011	19	0.011	0.047	0.074	0.000	0.002	0.002	0.004	0.017	0.083	0.001	0.068	299.467	0.590	0.1616496E-01	4.661053	0.6487336E-02	-0.1435824
05092011	20	0.045	0.066	0.078	0.000	0.002	0.003	0.006	0.024	0.080	0.003	0.069	297.287	0.633	NaN	6.310369	0.2332805E-01	-0.5678236
05092011	21	0.049	0.072	0.073	0.000	0.002	0.003	0.006	0.024	0.081	0.004	0.069	295.633	0.677	NaN	7.801260	0.1532593E-01	-0.2932621
05092011	22	0.036	0.069	0.069	0.000	0.002	0.002	0.005	0.020	0.087	0.004	0.067	294.434	0.715	NaN	8.443034	0.2420462E-01	-0.4573997
05092011	23	0.025	0.068	0.065	0.000	0.002	0.002	0.004	0.017	0.090	0.004	0.065	293.457	0.753	NaN	8.899238	0.3075189E-01	-0.5385190
05092011	24	0.020	0.074	0.058	0.000	0.002	0.002	0.004	0.014	0.090	0.004	0.061	292.514	0.800	NaN	10.70849	0.2580629E-01	-0.3819972
05102011	01	0.018	0.093	0.049	0.001	0.002	0.001	0.004	0.012	0.089	0.006	0.058	291.658	0.854	0.1553030	11.42962	0.3521638E-03	1.511287
05102011	02	0.019	0.105	0.041	0.001	0.002	0.001	0.004	0.011	0.088	0.008	0.055	291.107	0.883	0.2307432	14.17972	0.2786839E-03	1.706556
05102011	03	0.018	0.122	0.039	0.001	0.002	0.001	0.004	0.011	0.088	0.010	0.054	290.819	0.892	0.2600624	15.48255	0.2672357E-03	1.762948
05102011	04	0.021	0.144	0.040	0.001	0.002	0.001	0.004	0.012	0.090	0.013	0.054	290.697	0.890	0.3112690	16.03428	0.2155472E-03	1.871507
05102011	05	0.030	0.168	0.039	0.002	0.002	0.002	0.004	0.014	0.095	0.021	0.055	290.610	0.888	0.4315141	17.89572	0.1431857E-03	2.096850
05102011	06	0.051	0.199	0.031	0.003	0.002	0.003	0.005	0.018	0.100	0.034	0.056	290.531	0.889	0.6146477	20.30995	0.7633029E-04	2.425012
05102011	07	0.068	0.239	0.029	0.004	0.002	0.004	0.006	0.023	0.109	0.053	0.057	291.437	0.890	0.6843070	22.84084	0.5614898E-04	2.609370
05102011	08	0.064	0.254	0.060	0.003	0.003	0.005	0.007	0.028	0.113	0.065	0.061	295.050	0.830	0.3722206	12.54829	0.4480667E-04	2.447242
05102011	09	0.022	0.332	0.132	0.000	0.002	0.003	0.005	0.019	0.094	0.016	0.066	297.992	0.725	NaN	8.532344	0.1042128	-1.086853
05102011	10	0.001	0.436	0.157	0.000	0.002	0.002	0.003	0.011	0.077	0.001	0.075	300.024	0.628	0.3455877E-03	5.343756	0.6064374E-02	-0.5493939E-01
05102011	11	0.000	0.419	0.154	0.000	0.002	0.001	0.002	0.007	0.059	0.001	0.078	301.755	0.562	0.1013279E-04	5.367664	0.7740775E-02	-0.1589991
05102011	12	0.000	0.318	0.149	0.000	0.001	0.001	0.002	0.006	0.051	0.000	0.074	303.267	0.509	0.2563000E-05	4.840379	0.1287321E-01	-0.4248074
05102011	13	0.000	0.255	0.139	0.000	0.001	0.001	0.002	0.006	0.047	0.000	0.075	304.631	0.468	0.1072884E-05	4.706032	0.1765942E-01	-0.5743215
05102011	14	0.000	0.220	0.122	0.000	0.001	0.001	0.002	0.006	0.047	0.000	0.074	305.263	0.452	0.6556511E-06	4.324522	0.1652642E-01	-0.5822405
05102011	15	0.000	0.184	0.100	0.000	0.001	0.001	0.002	0.006	0.047	0.000	0.069	304.999	0.459	0.8344650E-06	3.852393	0.1148756E-01	-0.4744973
05102011	16	0.000	0.149	0.082	0.000	0.001	0.001	0.002	0.006	0.048	0.000	0.063	304.271	0.481	0.1549721E-05	3.273625	0.4638669E-02	-0.1513644
05102011	17	0.000	0.095	0.058	0.000	0.001	0.001	0.002	0.005	0.046	0.000	0.059	303.228	0.508	0.3397465E-05	3.376953	0.3934863E-02	-0.6640460E-01
05102011	18	0.001	0.086	0.046	0.000	0.001	0.001	0.002	0.008	0.061	0.000	0.061	301.951	0.538	0.8177757E-04	3.199136	0.2629406E-02	0.8517513E-01
05102011	19	0.026	0.109	0.042	0.000	0.002	0.002	0.004	0.017	0.081	0.001	0.064	300.186	0.602	NaN	4.898880	0.1375354E-01	-0.4483178
05102011	20	0.054	0.121	0.036	0.001	0.002	0.003	0.006	0.023	0.076	0.002	0.067	298.374	0.634	0.3970128E-01	4.284558	0.1871042E-03	1.359823
05102011	21	0.050	0.125	0.030	0.001	0.002	0.003	0.006	0.023	0.084	0.002	0.070	297.131	0.661	0.5595863E-01	5.016043	0.1873587E-03	1.427687
05102011	22	0.034	0.120	0.028	0.001	0.002	0.002	0.005	0.020	0.095	0.002	0.073	295.838	0.723	0.6760252E-01	6.793215	0.3318435E-03	1.311142
05102011	23	0.008	0.109	0.029	0.001	0.002	0.002	0.005	0.016	0.113	0.001	0.074	294.751	0.753	0.1459122E-02	12.62390	0.6034242E-02	0.3205709
05102011	24	0.006	0.113	0.034	0.001	0.002	0.002	0.004	0.015	0.111	0.001	0.074	294.085	0.769	0.1045823E-02	11.69110	0.5373605E-02	0.3375895
05112011	01	0.004	0.129	0.041	0.001	0.002	0.001	0.005	0.015	0.108	0.003	0.074	293.040	0.820	0.7514954E-03	12.30243	0.4680487E-02	0.4196999
05112011	02	0.004	0.156	0.052	0.000	0.002	0.001	0.004	0.015	0.103	0.004	0.073	292.320	0.853	0.5580544E-01	12.95856	0.6358336E-02	0.3092133
05112011	03	0.003	0.171	0.063	0.000	0.002	0.001	0.004	0.015	0.100	0.004	0.070	291.878	0.868	0.6077987E-01	14.57078	0.6669518E-02	0.3393882
05112011	04	0.006	0.189	0.072	0.001	0.002	0.001	0.004	0.016	0.099	0.007	0.066	291.606	0.875	0.7913697E-01	20.92210	0.8882529E-02	0.3720687
05112011	05	0.020	0.220	0.072	0.001	0.003	0.002	0.005	0.018	0.096	0.018	0.061	291.419	0.883	0.2739390	16.52574	0.2400009E-03	1.837948
05112011	06	0.036	0.251	0.059	0.003	0.003	0.003	0.006	0.021	0.097	0.037	0.057	291.347	0.890	0.4712047	20.70191	0.1226542E-03	2.227328
05112011	07	0.049	0.275	0.052	0.004	0.003	0.004	0.007	0.025	0.096	0.055	0.053	292.319	0.893	0.5489838	21.43703	0.7508133E-04	2.455633
05112011	08	0.058	0.258	0.078	0.003	0.003	0.004	0.008	0.029	0.078	0.054	0.050	295.932	0.826	0.2485328	8.385551	0.2767462E-04	2.481450
05112011	09	0.026	0.232	0.119	0.000	0.003	0.002	0.005	0.018	0.055	0.011	0.046	298.705	0.704	NaN	5.462488	0.8866543E-01	-1.210364
05112011	10	0.002	0.183	0.105	0.000	0.002	0.001	0.003	0.009	0.047	0.001	0.043	300.422	0.608	0.4286170E-03	2.660682	0.6112725E-02	-0.3612418
05112011	11	0.001	0.159	0.095	0.000	0.001	0.001	0.002	0.006	0.040	0.001	0.043	301.861	0.552	0.6425381E-04	2.351754	0.1925288E-02	0.8689620E-01
05112011	12	0.000	0.157	0.102	0.000	0.001	0.001	0.002	0.006	0.038	0.000	0.045	303.298	0.504	0.1931190E-04	2.118689	0.1041780E-02	0.3082913
05112011	13	0.000	0.153	0.110	0.000	0.001	0.001	0.002	0.006	0.038	0.000	0.048	304.692	0.458	0.4172325E-05	2.000858	0.8114211E-03	0.3919699
05112011	14	0.000	0.158	0.122	0.000	0.001	0.001	0.002	0.006	0.040	0.000	0.053	305.263	0.441	0.6556511E-06	2.285164	0.2432543E-02	-0.2714308E-01
05112011	15	0.000	0.166	0.128	0.000	0.001	0.001	0.002	0.006	0.043	0.000	0.058	305.022	0.442	0.5960464E-06	2.642960	0.4360878E-02	-0.2174834
05112011	16	0.000	0.170	0.127	0.000	0.001	0.001	0.002	0.007	0.048	0.000	0.060	304.447	0.451	0.2384186E-05	2.483870	0.1177972E-02	0.3239938
05112011	17	0.000	0.160	0.118	0.000	0.001	0.001	0.002	0.007	0.052	0.000	0.061	303.562	0.463	0.9417534E-05	2.518774	0.8976532E-03	0.4480807
05112011	18	0.001	0.151	0.101	0.000	0.001	0.001	0.003	0.009	0.061	0.000	0.060	302.588	0.473	0.4845858E-04	2.345663	0.2378167E-02	-0.5976758E-02
05112011	19	0.020	0.154	0.094	0.000	0.001	0.002	0.004	0.016	0.073	0.001	0.061	300.936	0.510	0.1370943E-01	4.614044	0.7808627E-02	-0.2284930
05112011	20	0.070	0.165	0.096	0.000	0.002	0.003	0.006	0.026	0.058	0.002	0.061	298.806	0.535	NaN	4.528559	0.1929277E-01	-0.6294345
05112011	21	0.090	0.167	0.095	0.000	0.002	0.003	0.007	0.029	0.049	0.003	0.059	297.073	0.574	NaN	5.299344	0.2439241E-02	0.3369673
05112011	22	0.091	0.157	0.086	0.000	0.002	0.003	0.007	0.029	0.044	0.004	0.056	295.691	0.624	NaN	6.012614	0.2877526E-03	1.320044
05112011	23	0.084	0.144	0.071	0.000	0.002	0.003	0.007	0.027	0.042	0.005	0.052	294.549	0.679	NaN	6.728978	0.1289008E-03	1.717694
05112011	24	0.072	0.141	0.057	0.000	0.002	0.002	0.006	0.024	0.044	0.006	0.049	293.538	0.738	NaN	7.782429	0.1515058E-03	1.710686
05122011	01	0.059	0.150	0.048	0.001	0.002	0.002	0.006	0.022	0.050	0.008	0.048	292.624	0.802	0.2204131	5.744088	0.4425803E-04	2.113229
05122011	02	0.047	0.162	0.042	0.001	0.002	0.002	0.005	0.020	0.056	0.010	0.048	292.044	0.840	0.2641571	7.776216	0.6106627E-04	2.104967
05122011	03	0.043	0.169	0.038	0.001	0.002	0.002	0.005	0.020	0.060	0.011	0.049	291.719	0.855	0.3083636	9.338925	0.6688587E-04	2.144963
05122011	04	0.047	0.171	0.035	0.001	0.002	0.002	0.005	0.020	0.062	0.013	0.049	291.508	0.862	0.3481756	9.602506	0.5947352E-04	2.208061
05122011	05	0.061	0.169	0.030	0.001	0.002	0.002	0.006	0.022	0.063	0.016	0.051	291.359	0.866	0.4554090	11.10998	0.4605246E-04	2.382461
05122011	06	0.091	0.173	0.022	0.002	0.002	0.003	0.007	0.026	0.062	0.021	0.053	291.313	0.871	0.5853270	11.48001	0.2571112E-04	2.649821
05122011	07	0.118	0.183	0.020	0.003	0.003	0.005	0.008	0.032	0.062	0.032	0.056	292.295	0.875	0.6665766	13.70603	0.1833550E-04	2.873619
05122011	08	0.100	0.165	0.046	0.002	0.003	0.006	0.010	0.039	0.060	0.043	0.058	295.555	0.812	0.3134173	6.631391	0.1109956E-04	2.776299
05122011	09	0.026	0.184	0.123	0.000	0.002	0.004	0.007	0.025	0.081	0.012	0.067	298.216	0.707	NaN	7.625849	0.8601745E-01	-1.052298
05122011	10	0.002	0.307	0.177	0.000	0.002	0.002	0.005	0.016	0.083	0.002	0.082	300.352	0.610	0.3731251E-03	5.013378	0.7473146E-02	-0.1733730
05122011	11	0.000	0.403	0.195	0.000	0.002	0.001	0.003	0.011	0.064	0.000	0.093	302.206	0.533	0.5185604E-05	5.912689	0.1228480E-01	-0.3175830
05122011	12	0.000	0.313	0.185	0.000	0.002	0.001	0.003	0.008	0.056	0.000	0.086	303.780	0.476	0.1549721E-05	5.151165	0.1574461E-01	-0.4852265
05122011	13	0.000	0.216	0.159	0.000	0.002	0.001	0.003	0.007	0.051	0.000	0.076	304.867	0.438	0.5960464E-06	3.887370	0.1141797E-01	-0.4679332
05122011	14	0.000	0.161	0.126	0.000	0.001	0.001	0.003	0.006	0.046	0.000	0.066	304.719	0.424	0.3576279E-06	3.075042	0.8285824E-02	-0.4304847
05122011	15	0.000	0.138	0.104	0.000	0.001	0.001	0.002	0.006	0.045	0.000	0.065	305.115	0.420	0.3576279E-06	3.101778	0.9297268E-02	-0.4767446
05122011	16	0.000	0.119	0.086	0.000	0.001	0.001	0.002	0.005	0.046	0.000	0.065	304.673	0.420	0.3576279E-06	3.140674	0.9303208E-02	-0.4716099
05122011	17	0.000	0.107	0.072	0.000	0.001	0.001	0.002	0.005	0.051	0.000	0.067	303.464	0.430	0.5364418E-06	3.105207	0.6354997E-02	-0.3110248
05122011	18	0.001	0.113	0.060	0.000	0.001	0.001	0.003	0.007	0.068	0.001	0.067	302.460	0.439	0.3153086E-04	2.487378	0.1610617E-02	0.1887495
05122011	19	0.011	0.124	0.048	0.000	0.002	0.002	0.004	0.013	0.091	0.001	0.067	300.676	0.488	0.1661533E-01	3.937013	0.6990347E-02	-0.2493319
05122011	20	0.029	0.132	0.043	0.001	0.002	0.002	0.005	0.017	0.083	0.002	0.064	296.332	0.558	0.2467638E-01	3.654298	0.4116313E-03	0.9482955
05122011	21	0.023	0.146	0.035	0.001	0.002	0.002	0.005	0.017	0.079	0.001	0.061	294.855	0.578	0.3080028E-01	3.632406	0.3850488E-03	0.9746785
05122011	22	0.008	0.155	0.032	0.000	0.002	0.002	0.004	0.016	0.088	0.001	0.060	294.121	0.592	NaN	4.336392	0.1165658E-01	-0.4294425
05122011	23	0.005	0.162	0.032	0.000	0.001	0.002	0.004	0.015	0.085	0.001	0.060	292.942	0.657	0.4812932E-01	6.542846	0.5294779E-02	0.9191883E-01
05122011	24	0.004	0.151	0.030	0.000	0.001	0.001	0.004	0.014	0.083	0.001	0.060	292.206	0.713	0.4598451E-01	6.057130	0.4586997E-02	0.1207385
05132011	01	0.003	0.147	0.029	0.000	0.001	0.001	0.004	0.013	0.081	0.001	0.060	291.485	0.771	0.3077227E-01	7.024493	0.4862788E-02	0.1597297
05132011	02	0.002	0.159	0.030	0.000	0.001	0.001	0.003	0.012	0.078	0.001	0.060	290.995	0.811	0.1599604E-01	8.405985	0.6509602E-02	0.1110342
05132011	03	0.002	0.188	0.034	0.000	0.001	0.001	0.003	0.012	0.075	0.001	0.060	290.720	0.832	0.1435322E-01	9.250837	0.7159377E-02	0.1113058
05132011	04	0.002	0.233	0.042	0.000	0.001	0.001	0.004	0.013	0.077	0.002	0.059	290.523	0.847	0.3219771E-01	10.13373	0.5647569E-02	0.2539078
05132011	05	0.012	0.277	0.045	0.001	0.002	0.002	0.004	0.016	0.085	0.007	0.059	290.347	0.860	0.1779878	11.64610	0.3324426E-03	1.544464
05132011	06	0.040	0.320	0.036	0.003	0.002	0.003	0.006	0.022	0.084	0.020	0.059	290.270	0.875	0.4917458	15.69371	0.8700350E-04	2.256189
05132011	07	0.067	0.365	0.026	0.005	0.003	0.005	0.008	0.030	0.081	0.038	0.059	291.283	0.888	0.6555482	18.38400	0.3985348E-04	2.663974
05132011	08	0.069	0.327	0.046	0.003	0.003	0.006	0.009	0.036	0.061	0.038	0.058	294.887	0.800	0.2561391	6.188270	0.1676616E-04	2.567136
05132011	09	0.016	0.414	0.090	0.001	0.003	0.003	0.006	0.022	0.059	0.007	0.055	297.418	0.711	0.2325773E-03	9.929094	0.6484401E-02	0.1850398
05132011	10	0.001	0.413	0.100	0.000	0.002	0.002	0.004	0.012	0.054	0.001	0.056	299.702	0.618	0.3347397E-03	3.525047	0.5457005E-02	-0.1897895
05132011	11	0.000	0.288	0.105	0.000	0.002	0.001	0.003	0.009	0.047	0.001	0.060	301.325	0.544	0.2574921E-04	3.196815	0.1515970E-02	0.3240268
05132011	12	0.000	0.183	0.102	0.000	0.002	0.001	0.003	0.007	0.043	0.001	0.061	302.619	0.495	0.2503395E-05	3.353281	0.4741771E-02	-0.1504706
05132011	13	0.000	0.121	0.085	0.000	0.001	0.001	0.003	0.006	0.040	0.001	0.060	303.711	0.468	0.9536743E-06	3.327224	0.8454500E-02	-0.4050058
05132011	14	0.000	0.087	0.070	0.000	0.001	0.001	0.002	0.005	0.040	0.000	0.061	303.872	0.461	0.7748604E-06	3.532758	0.1146480E-01	-0.5112526
05132011	15	0.000	0.061	0.062	0.000	0.001	0.001	0.002	0.005	0.041	0.000	0.065	301.907	0.490	0.1788139E-05	4.297157	0.1472851E-01	-0.5349775
05132011	16	0.000	0.051	0.056	0.000	0.001	0.001	0.002	0.005	0.044	0.000	0.071	301.259	0.520	0.3397465E-05	5.259848	0.1807608E-01	-0.5361310
05132011	17	0.000	0.052	0.048	0.000	0.001	0.001	0.002	0.004	0.043	0.000	0.072	299.905	0.557	0.7629395E-05	6.266816	0.2163182E-01	-0.5380462
05132011	18	0.000	0.060	0.041	0.000	0.001	0.001	0.002	0.005	0.045	0.000	0.072	298.105	0.608	0.2038479E-04	6.903532	0.1935985E-01	-0.4478307
05132011	19	0.000	0.069	0.032	0.000	0.001	0.001	0.002	0.007	0.054	0.000	0.072	296.272	0.665	0.8988380E-04	7.177072	0.1060444E-01	-0.1695406
05132011	20	0.001	0.085	0.027	0.000	0.001	0.001	0.003	0.010	0.073	0.000	0.075	294.472	0.720	0.7264018E-03	7.675066	0.8934794E-02	-0.6600245E-01
05132011	21	0.002	0.096	0.031	0.000	0.002	0.002	0.004	0.015	0.091	0.001	0.076	293.108	0.761	0.6222427E-02	8.414049	0.9827130E-02	-0.6742169E-01
05132011	22	0.002	0.103	0.043	0.000	0.002	0.002	0.005	0.016	0.095	0.001	0.075	292.305	0.780	0.1695591E-01	9.075675	0.7216484E-02	0.9955329E-01
05132011	23	0.002	0.113	0.057	0.000	0.002	0.002	0.005	0.016	0.095	0.001	0.074	291.756	0.787	0.2161884E-01	9.376973	0.6876253E-02	0.1347108
05132011	24	0.002	0.126	0.070	0.000	0.002	0.002	0.004	0.014	0.095	0.002	0.072	291.304	0.804	0.2079099E-01	9.798495	0.7341260E-02	0.1253888
05142011	01	0.002	0.136	0.083	0.000	0.002	0.002	0.004	0.013	0.092	0.002	0.071	290.776	0.832	0.2061504E-01	11.30797	0.8177655E-02	0.1407561
05142011	02	0.002	0.141	0.091	0.000	0.002	0.002	0.004	0.012	0.089	0.002	0.068	290.446	0.856	0.2703804E-01	13.09463	0.8124374E-02	0.2073034
05142011	03	0.002	0.143	0.096	0.000	0.002	0.001	0.004	0.012	0.086	0.003	0.064	290.299	0.870	0.3127116E-01	13.08343	0.7629382E-02	0.2342321
05142011	04	0.001	0.108	0.084	0.000	0.001	0.001	0.003	0.009	0.072	0.002	0.062	290.274	0.872	0.1085049E-01	12.97306	0.1041904E-01	0.9521478E-01
05142011	05	0.000	0.066	0.055	0.000	0.001	0.001	0.002	0.005	0.057	0.001	0.060	290.073	0.896	0.8889616E-02	18.15900	0.1497727E-01	0.8365931E-01
05142011	06	0.001	0.055	0.037	0.001	0.001	0.001	0.002	0.003	0.057	0.001	0.054	290.027	0.909	0.000000	18.39465	0.1190974E-01	0.1887891
05142011	07	0.001	0.065	0.032	0.001	0.001	0.001	0.001	0.002	0.066	0.002	0.045	291.168	0.901	0.000000	13.62665	0.6153093E-02	0.3452958
05142011	08	0.000	0.094	0.018	0.000	0.001	0.000	0.001	0.001	0.029	0.000	0.031	292.604	0.875	0.2149343E-02	8.465845	0.8346872E-02	0.6146556E-02
05142011	09	0.000	0.068	0.019	0.000	0.000	0.000	0.001	0.001	0.027	0.000	0.032	293.536	0.819	0.5257130E-03	6.277856	0.8903179E-02	-0.1517337
05142011	10	0.000	0.066	0.031	0.000	0.000	0.000	0.000	0.001	0.020	0.000	0.035	294.549	0.768	0.1371503E-03	6.397349	0.1744194E-01	-0.4355948
05142011	11	0.000	0.062	0.045	0.000	0.000	0.000	0.000	0.001	0.020	0.000	0.039	295.433	0.715	0.6246567E-04	6.192875	0.2103602E-01	-0.5310713
05142011	12	0.000	0.059	0.050	0.000	0.001	0.000	0.001	0.001	0.020	0.000	0.043	296.083	0.667	0.3117323E-04	5.900753	0.2263752E-01	-0.5839214
05142011	13	0.000	0.059	0.049	0.000	0.001	0.000	0.001	0.002	0.021	0.000	0.045	297.026	0.606	0.1227856E-04	5.071318	0.2196142E-01	-0.6365396
05142011	14	0.000	0.057	0.045	0.000	0.001	0.000	0.001	0.003	0.021	0.000	0.045	298.141	0.533	0.3218651E-05	3.987450	0.2026484E-01	-0.7060480
05142011	15	0.000	0.048	0.038	0.000	0.001	0.000	0.001	0.003	0.022	0.000	0.042	297.082	0.544	0.3576279E-05	3.592640	0.1612143E-01	-0.6519899
05142011	16	0.000	0.048	0.032	0.000	0.001	0.000	0.001	0.003	0.023	0.000	0.038	297.624	0.530	0.2503395E-05	2.871788	0.1077725E-01	-0.5743556
05142011	17	0.000	0.044	0.026	0.000	0.001	0.000	0.001	0.002	0.024	0.000	0.030	296.356	0.543	0.3755093E-05	1.897839	0.2730974E-02	-0.1580580
05142011	18	0.001	0.043	0.020	0.000	0.001	0.000	0.001	0.003	0.027	0.000	0.024	295.497	0.548	0.8052588E-04	1.255388	0.1112222E-01	-0.9474134
05142011	19	0.011	0.049	0.014	0.001	0.001	0.001	0.001	0.004	0.026	0.000	0.018	294.334	0.563	0.1219428E-01	1.128438	0.1061549E-03	1.026538
05142011	20	0.023	0.033	0.010	0.001	0.001	0.001	0.002	0.005	0.016	0.000	0.015	293.153	0.587	0.1213598E-01	0.8739826	0.5823260E-04	1.176337
05142011	21	0.023	0.023	0.009	0.001	0.002	0.001	0.002	0.005	0.013	0.000	0.014	292.256	0.619	0.1697588E-01	0.8841859	0.4141152E-04	1.329422
05142011	22	0.020	0.019	0.009	0.001	0.002	0.001	0.002	0.005	0.013	0.000	0.014	291.407	0.652	0.2043724E-01	0.9662148	0.4282084E-04	1.353418
05142011	23	0.014	0.016	0.009	0.001	0.002	0.001	0.002	0.005	0.017	0.000	0.015	290.591	0.692	0.2520412E-01	1.205309	0.5683432E-04	1.326488
05142011	24	0.008	0.014	0.010	0.001	0.002	0.001	0.001	0.004	0.028	0.000	0.020	289.920	0.728	0.3048277E-01	2.151769	0.1799688E-03	1.077598
05152011	01	0.002	0.014	0.010	0.001	0.002	0.001	0.001	0.004	0.039	0.000	0.026	289.260	0.767	0.6533861E-03	3.990328	0.2282504E-02	0.2425969
05152011	02	0.000	0.017	0.013	0.000	0.001	0.000	0.001	0.003	0.036	0.000	0.032	288.723	0.793	0.1238108E-02	4.569462	0.8865931E-02	-0.2878592
05152011	03	0.000	0.015	0.015	0.000	0.001	0.000	0.001	0.003	0.029	0.000	0.035	288.350	0.803	0.6652474E-03	5.694208	0.9434829E-02	-0.2193007
05152011	04	0.000	0.014	0.016	0.000	0.001	0.000	0.001	0.003	0.026	0.000	0.036	288.050	0.807	0.6669760E-03	6.547960	0.1210565E-01	-0.2668822
05152011	05	0.000	0.016	0.017	0.000	0.001	0.000	0.001	0.004	0.028	0.000	0.038	287.788	0.808	0.7436275E-03	6.634372	0.1191134E-01	-0.2541608
05152011	06	0.000	0.021	0.019	0.000	0.001	0.001	0.002	0.005	0.033	0.000	0.040	287.568	0.809	0.1281798E-02	6.401386	0.9103966E-02	-0.1529566
05152011	07	0.000	0.025	0.021	0.000	0.001	0.001	0.002	0.005	0.036	0.000	0.040	288.307	0.769	0.8818507E-03	5.219986	0.8245777E-02	-0.1985623
05152011	08	0.000	0.030	0.023	0.000	0.001	0.001	0.001	0.004	0.033	0.000	0.039	288.977	0.735	0.3968477E-03	4.685233	0.6879283E-02	-0.1668120
05152011	09	0.000	0.041	0.028	0.000	0.001	0.001	0.001	0.003	0.031	0.000	0.038	289.068	0.722	0.2526045E-03	4.432318	0.6486743E-02	-0.1653958
05152011	10	0.000	0.053	0.031	0.000	0.001	0.001	0.001	0.003	0.033	0.000	0.035	289.649	0.698	0.3000498E-03	3.598542	0.5510707E-02	-0.1850807
05152011	11	0.000	0.056	0.040	0.000	0.001	0.001	0.001	0.003	0.032	0.000	0.035	290.234	0.676	0.2112389E-03	3.353568	0.4265823E-02	-0.1044958
05152011	12	0.000	0.051	0.042	0.000	0.001	0.001	0.001	0.003	0.031	0.000	0.036	290.887	0.645	0.1112819E-03	3.130347	0.3248293E-02	-0.1606266E-01
05152011	13	0.000	0.052	0.040	0.000	0.001	0.001	0.001	0.003	0.033	0.000	0.036	290.804	0.641	0.1336932E-03	2.983931	0.3204277E-02	-0.3094127E-01
05152011	14	0.000	0.060	0.033	0.001	0.002	0.001	0.002	0.004	0.036	0.000	0.035	290.773	0.638	0.000000	2.714810	0.1660066E-01	-0.7863861
05152011	15	0.000	0.050	0.030	0.001	0.002	0.001	0.002	0.004	0.040	0.000	0.035	290.422	0.646	0.000000	2.748111	0.1273102E-01	-0.6658289
05152011	16	0.001	0.045	0.027	0.001	0.002	0.001	0.002	0.005	0.044	0.000	0.034	290.000	0.658	0.000000	2.825582	0.5593098E-02	-0.2965445
05152011	17	0.002	0.042	0.022	0.001	0.002	0.001	0.002	0.006	0.048	0.000	0.033	289.658	0.665	0.3516674E-03	3.349046	0.2507788E-02	0.1256303
05152011	18	0.009	0.043	0.019	0.001	0.002	0.001	0.002	0.007	0.045	0.001	0.032	289.176	0.681	0.4098660E-01	2.818759	0.3159436E-03	0.9504484
05152011	19	0.010	0.046	0.016	0.001	0.002	0.001	0.002	0.007	0.043	0.001	0.031	288.659	0.707	0.5436146E-01	2.996824	0.2543172E-03	1.071285
05152011	20	0.009	0.044	0.014	0.001	0.002	0.001	0.002	0.006	0.043	0.001	0.030	288.114	0.725	0.6078076E-01	3.207492	0.2602907E-03	1.090707
05152011	21	0.005	0.040	0.015	0.001	0.002	0.001	0.002	0.006	0.046	0.001	0.031	288.002	0.741	0.4866076E-01	3.436422	0.3748259E-03	0.9622769
05152011	22	0.001	0.044	0.016	0.000	0.002	0.001	0.002	0.005	0.048	0.000	0.034	287.831	0.755	0.1893920E-01	4.182011	0.3344528E-02	0.9705030E-01
05152011	23	0.001	0.040	0.016	0.000	0.002	0.001	0.002	0.005	0.047	0.000	0.036	287.184	0.783	0.8261621E-02	4.715045	0.5343044E-02	-0.5430293E-01
05152011	24	0.001	0.033	0.014	0.001	0.002	0.001	0.002	0.007	0.045	0.000	0.036	286.809	0.810	0.000000	5.115703	0.4015313E-02	0.1051859
05162011	01	0.001	0.030	0.014	0.001	0.002	0.001	0.002	0.007	0.041	0.001	0.036	286.533	0.831	0.000000	5.567193	0.5336052E-02	0.1841616E-01
05162011	02	0.000	0.025	0.014	0.001	0.002	0.001	0.002	0.007	0.034	0.001	0.035	286.326	0.843	0.000000	5.736255	0.6783411E-02	-0.7281972E-01
05162011	03	0.000	0.019	0.013	0.001	0.002	0.001	0.002	0.007	0.028	0.000	0.036	286.215	0.846	0.000000	6.580912	0.8020687E-02	-0.8592550E-01
05162011	04	0.000	0.016	0.013	0.001	0.001	0.001	0.002	0.007	0.026	0.000	0.037	286.104	0.849	0.000000	7.168291	0.9470670E-02	-0.1209650
05162011	05	0.000	0.018	0.014	0.001	0.002	0.001	0.003	0.008	0.032	0.000	0.039	286.035	0.847	0.000000	6.935251	0.8027014E-02	-0.6349184E-01
05162011	06	0.006	0.024	0.013	0.001	0.002	0.002	0.004	0.012	0.046	0.002	0.039	286.028	0.847	0.1721323E-02	9.657152	0.2455145E-02	0.5947719
05162011	07	0.014	0.027	0.012	0.002	0.002	0.002	0.004	0.015	0.045	0.004	0.040	286.459	0.845	0.2620515	6.244585	0.1007333E-03	1.792330
05162011	08	0.001	0.027	0.018	0.001	0.002	0.002	0.003	0.011	0.044	0.001	0.041	286.871	0.849	0.000000	6.607412	0.3591658E-02	0.2647364
05162011	09	0.000	0.029	0.019	0.001	0.001	0.001	0.002	0.006	0.031	0.001	0.038	287.808	0.837	0.000000	6.855366	0.8340016E-02	-0.8513622E-01
05162011	10	0.000	0.025	0.018	0.001	0.001	0.001	0.001	0.003	0.025	0.001	0.032	288.509	0.799	0.000000	5.217155	0.7647093E-02	-0.1660626
05162011	11	0.000	0.022	0.019	0.000	0.001	0.001	0.001	0.002	0.020	0.000	0.028	289.377	0.782	0.3753304E-03	4.462947	0.7029790E-02	-0.1973206
05162011	12	0.000	0.021	0.023	0.000	0.001	0.000	0.001	0.002	0.018	0.000	0.025	289.850	0.756	0.1865029E-03	3.619886	0.6758987E-02	-0.2711866
05162011	13	0.000	0.023	0.034	0.001	0.001	0.000	0.001	0.002	0.021	0.000	0.025	289.541	0.752	0.000000	3.262714	0.5255071E-02	-0.2069996
05162011	14	0.000	0.025	0.040	0.000	0.001	0.001	0.001	0.002	0.026	0.000	0.027	290.509	0.718	0.3373027E-03	3.040658	0.4482914E-02	-0.1685928
05162011	15	0.000	0.027	0.037	0.000	0.001	0.001	0.001	0.003	0.022	0.000	0.028	290.394	0.676	0.1182556E-03	2.685813	0.3071279E-02	-0.5824358E-01
05162011	16	0.000	0.028	0.031	0.000	0.001	0.001	0.001	0.003	0.021	0.000	0.028	291.227	0.651	0.6550550E-04	2.491020	0.2777060E-02	-0.4720810E-01
05162011	17	0.000	0.027	0.029	0.000	0.001	0.000	0.001	0.003	0.021	0.000	0.028	289.357	0.690	0.7861853E-04	2.891245	0.5061667E-02	-0.2432087
05162011	18	0.000	0.029	0.023	0.000	0.001	0.001	0.001	0.004	0.026	0.000	0.029	288.953	0.705	0.3182888E-03	2.925808	0.5476710E-02	-0.2722740
05162011	19	0.000	0.031	0.021	0.000	0.001	0.001	0.001	0.005	0.030	0.000	0.030	288.346	0.715	0.6312728E-03	2.952786	0.1068254E-01	-0.5584424
05162011	20	0.000	0.034	0.024	0.001	0.001	0.001	0.001	0.005	0.033	0.000	0.031	287.954	0.721	0.000000	3.030210	0.1051531E-01	-0.5403494
05162011	21	0.000	0.033	0.026	0.001	0.001	0.001	0.002	0.005	0.037	0.000	0.033	287.198	0.750	0.000000	3.625037	0.8801739E-02	-0.3852560
05162011	22	0.001	0.029	0.024	0.001	0.001	0.001	0.002	0.005	0.043	0.000	0.033	286.659	0.773	0.000000	4.078866	0.4762233E-02	-0.6727122E-01
05162011	23	0.002	0.028	0.020	0.001	0.001	0.001	0.002	0.005	0.046	0.000	0.031	286.277	0.782	0.5800724E-03	4.440807	0.1994216E-02	0.3476896
05162011	24	0.005	0.026	0.016	0.001	0.002	0.001	0.002	0.005	0.041	0.001	0.027	286.006	0.785	0.8912992E-01	3.770258	0.2397422E-03	1.196627
05172011	01	0.009	0.024	0.015	0.001	0.002	0.000	0.002	0.004	0.030	0.001	0.021	285.747	0.788	0.8404702E-01	2.899226	0.1651547E-03	1.244391
05172011	02	0.009	0.021	0.016	0.001	0.002	0.000	0.001	0.004	0.026	0.001	0.018	285.456	0.790	0.8401430E-01	2.433040	0.1218735E-03	1.300240
05172011	03	0.008	0.020	0.017	0.001	0.002	0.000	0.001	0.004	0.028	0.002	0.019	285.126	0.789	0.8451557E-01	2.610065	0.1462288E-03	1.251618
05172011	04	0.009	0.020	0.018	0.001	0.002	0.000	0.001	0.004	0.035	0.003	0.022	284.898	0.780	0.1149185	3.040727	0.1509439E-03	1.304162
05172011	05	0.013	0.021	0.017	0.001	0.002	0.001	0.002	0.004	0.045	0.006	0.026	284.602	0.774	0.2319872	3.810251	0.9139303E-04	1.620041
05172011	06	0.019	0.023	0.014	0.001	0.002	0.001	0.002	0.005	0.055	0.009	0.031	284.364	0.768	0.3458071	4.634239	0.7770761E-04	1.775515
05172011	07	0.020	0.025	0.015	0.001	0.002	0.001	0.002	0.006	0.062	0.011	0.035	284.679	0.752	0.3422985	4.757311	0.8751775E-04	1.735265
05172011	08	0.010	0.037	0.030	0.001	0.002	0.001	0.002	0.005	0.066	0.009	0.036	286.004	0.707	0.1699439	4.189446	0.1815709E-03	1.363110
05172011	09	0.002	0.055	0.052	0.000	0.002	0.001	0.001	0.004	0.060	0.001	0.037	286.987	0.663	0.3119093E-01	3.674411	0.3278069E-02	0.4956955E-01
05172011	10	0.000	0.056	0.054	0.000	0.001	0.001	0.001	0.004	0.055	0.000	0.040	287.082	0.645	0.2054632E-02	3.241719	0.1121414E-01	-0.5389906
05172011	11	0.000	0.053	0.054	0.000	0.001	0.001	0.001	0.004	0.053	0.000	0.043	287.983	0.609	0.7107258E-03	2.953868	0.1942287E-01	-0.8179222
05172011	12	0.000	0.050	0.056	0.000	0.001	0.000	0.001	0.004	0.048	0.000	0.047	289.201	0.568	0.7688999E-04	2.889761	0.4324378E-02	-0.1750616
05172011	13	0.000	0.042	0.054	0.000	0.001	0.000	0.001	0.003	0.046	0.000	0.050	289.669	0.536	0.2306700E-04	2.905898	0.2272383E-02	0.1067988
05172011	14	0.000	0.034	0.051	0.000	0.001	0.000	0.001	0.003	0.049	0.000	0.050	290.022	0.524	0.3188848E-04	2.668928	0.1768370E-02	0.1787638
05172011	15	0.000	0.030	0.047	0.000	0.001	0.001	0.001	0.003	0.054	0.000	0.047	289.354	0.533	0.2598166E-03	2.562186	0.2921859E-01	-1.057049
05172011	16	0.000	0.029	0.040	0.000	0.001	0.001	0.001	0.004	0.060	0.000	0.045	288.845	0.545	0.7055402E-03	2.519682	0.1710044E-01	-0.8316617
05172011	17	0.000	0.031	0.035	0.000	0.001	0.001	0.002	0.004	0.063	0.000	0.044	288.297	0.562	0.1666665E-02	2.704942	0.1110668E-01	-0.6134262
05172011	18	0.001	0.035	0.030	0.000	0.001	0.001	0.002	0.005	0.060	0.000	0.042	287.843	0.574	0.3042936E-02	2.689182	0.7513622E-02	-0.4462292
05172011	19	0.001	0.031	0.023	0.001	0.001	0.001	0.002	0.006	0.058	0.000	0.041	287.386	0.586	0.000000	2.762291	0.5701498E-02	-0.3147196
05172011	20	0.001	0.029	0.023	0.000	0.001	0.001	0.002	0.006	0.060	0.000	0.043	286.922	0.606	0.4195273E-02	3.054736	0.7273351E-02	-0.3767609
05172011	21	0.000	0.031	0.024	0.000	0.001	0.001	0.002	0.006	0.062	0.000	0.046	285.937	0.642	0.2986372E-02	3.497604	0.1139207E-01	-0.5128322
05172011	22	0.000	0.037	0.025	0.000	0.001	0.001	0.003	0.007	0.064	0.000	0.048	285.143	0.679	0.5071044E-02	4.153415	0.9962881E-02	-0.3799796
05172011	23	0.001	0.042	0.026	0.001	0.002	0.001	0.003	0.009	0.067	0.001	0.049	284.482	0.716	0.000000	4.906397	0.4426799E-02	0.4467294E-01
05172011	24	0.002	0.049	0.033	0.001	0.002	0.001	0.004	0.009	0.069	0.001	0.049	283.843	0.754	0.000000	5.587266	0.2358724E-02	0.3745222
05182011	01	0.002	0.055	0.040	0.000	0.002	0.001	0.004	0.010	0.071	0.002	0.048	283.210	0.793	0.7817739E-01	7.906024	0.4375221E-02	0.2569582
05182011	02	0.002	0.061	0.042	0.001	0.002	0.001	0.004	0.011	0.076	0.007	0.049	282.760	0.819	0.1822531E-02	10.99008	0.2404664E-02	0.6599466
05182011	03	0.003	0.068	0.042	0.001	0.003	0.001	0.005	0.012	0.080	0.016	0.050	282.541	0.831	0.2423589	9.239213	0.4713072E-03	1.292331
05182011	04	0.004	0.074	0.042	0.001	0.003	0.001	0.005	0.014	0.086	0.023	0.051	282.445	0.836	0.3343152	10.66749	0.3375032E-03	1.499784
05182011	05	0.008	0.080	0.030	0.002	0.003	0.002	0.006	0.017	0.094	0.036	0.052	282.381	0.839	0.5395899	12.24784	0.1524398E-03	1.904961
05182011	06	0.020	0.090	0.016	0.003	0.004	0.003	0.007	0.022	0.101	0.051	0.054	282.417	0.841	0.7642165	13.97866	0.5765609E-04	2.384620
05182011	07	0.021	0.104	0.019	0.003	0.004	0.004	0.008	0.024	0.108	0.061	0.056	283.209	0.824	0.7426864	13.23281	0.5132437E-04	2.411329
05182011	08	0.004	0.148	0.074	0.001	0.003	0.002	0.006	0.017	0.102	0.029	0.061	285.214	0.744	0.2255340	7.583580	0.3077882E-03	1.391622
05182011	09	0.001	0.162	0.095	0.000	0.003	0.002	0.005	0.012	0.089	0.006	0.063	286.599	0.677	0.3434575E-01	5.678411	0.4920683E-02	0.6220140E-01
05182011	10	0.001	0.122	0.091	0.000	0.003	0.002	0.004	0.011	0.084	0.002	0.065	286.853	0.652	0.6989300E-02	5.111065	0.1037246E-01	-0.3073705
05182011	11	0.000	0.110	0.093	0.000	0.003	0.002	0.004	0.011	0.084	0.001	0.071	288.023	0.618	0.1853228E-02	4.770590	0.2183589E-01	-0.6605988
05182011	12	0.000	0.110	0.102	0.000	0.003	0.001	0.004	0.011	0.081	0.001	0.076	289.913	0.571	0.5409122E-03	4.289466	0.3772542E-01	-0.9442309
05182011	13	0.000	0.101	0.111	0.000	0.002	0.001	0.004	0.010	0.075	0.001	0.081	292.449	0.517	0.8386374E-04	4.034760	0.2730861E-02	0.1695181
05182011	14	0.000	0.091	0.111	0.000	0.002	0.001	0.003	0.009	0.070	0.001	0.084	293.028	0.494	0.1889467E-04	3.904480	0.1722802E-02	0.3553279
05182011	15	0.000	0.089	0.107	0.000	0.002	0.001	0.003	0.009	0.071	0.001	0.086	292.481	0.501	0.1746416E-04	4.195813	0.2336856E-02	0.2541843
05182011	16	0.000	0.086	0.101	0.000	0.002	0.001	0.003	0.009	0.072	0.001	0.091	291.644	0.517	0.1609325E-04	5.110671	0.5450323E-02	-0.2794433E-01
05182011	17	0.000	0.086	0.092	0.000	0.002	0.001	0.003	0.010	0.075	0.001	0.096	290.914	0.531	0.1978874E-04	5.606452	0.6731571E-02	-0.7942832E-01
05182011	18	0.000	0.091	0.077	0.000	0.002	0.002	0.004	0.011	0.080	0.001	0.099	290.402	0.542	0.5227327E-04	5.613838	0.3702341E-02	0.1807835
05182011	19	0.000	0.097	0.060	0.000	0.002	0.002	0.004	0.015	0.093	0.001	0.099	290.028	0.553	0.1778007E-03	5.331487	0.8112103E-02	-0.1822851
05182011	20	0.002	0.107	0.059	0.000	0.002	0.002	0.006	0.023	0.120	0.001	0.098	288.897	0.582	0.5656779E-02	5.587273	0.1407141E-01	-0.4011378
05182011	21	0.003	0.109	0.081	0.000	0.003	0.003	0.007	0.028	0.140	0.005	0.096	287.449	0.627	0.7090211E-01	10.79304	0.8315417E-02	0.1132597
05182011	22	0.007	0.103	0.102	0.000	0.003	0.003	0.008	0.028	0.139	0.012	0.093	286.410	0.667	NaN	8.607909	0.7639638E-01	-0.9481751
05182011	23	0.002	0.097	0.134	0.000	0.003	0.003	0.007	0.027	0.141	0.009	0.091	285.573	0.707	NaN	9.702836	0.1079561	-1.046348
05182011	24	0.001	0.092	0.165	0.000	0.003	0.002	0.007	0.026	0.137	0.011	0.090	284.878	0.750	0.7332850E-01	15.68184	0.1390819E-01	0.5212619E-01
05192011	01	0.001	0.087	0.188	0.000	0.002	0.002	0.007	0.026	0.134	0.015	0.090	284.270	0.796	0.7485825E-01	17.88699	0.1596500E-01	0.4936838E-01
05192011	02	0.001	0.081	0.200	0.000	0.002	0.002	0.007	0.025	0.131	0.017	0.089	283.904	0.825	0.7656181E-01	19.54605	0.1726120E-01	0.5398802E-01
05192011	03	0.001	0.074	0.197	0.000	0.002	0.002	0.007	0.024	0.131	0.018	0.088	283.756	0.835	0.8034790E-01	20.68883	0.1789129E-01	0.6309436E-01
05192011	04	0.001	0.071	0.181	0.000	0.002	0.002	0.007	0.024	0.136	0.023	0.087	283.676	0.840	0.9337646E-01	23.43145	0.1968251E-01	0.7571863E-01
05192011	05	0.002	0.072	0.144	0.001	0.002	0.002	0.007	0.026	0.150	0.045	0.087	283.627	0.845	0.2311681	19.61592	0.1473412E-02	1.124284
05192011	06	0.005	0.081	0.094	0.002	0.003	0.003	0.008	0.030	0.175	0.079	0.087	283.686	0.850	0.4581752	24.22560	0.6200209E-03	1.591868
05192011	07	0.010	0.091	0.054	0.003	0.003	0.005	0.009	0.036	0.198	0.115	0.087	284.978	0.852	0.6782373	28.37153	0.2394216E-03	2.073720
05192011	08	0.015	0.088	0.074	0.002	0.003	0.005	0.009	0.037	0.184	0.103	0.087	287.929	0.767	0.5312046	15.51871	0.1116746E-03	2.142901
05192011	09	0.002	0.069	0.155	0.000	0.002	0.003	0.006	0.020	0.126	0.010	0.085	290.387	0.664	0.3581852E-01	9.259150	0.8370414E-02	0.4382413E-01
05192011	10	0.001	0.115	0.140	0.000	0.002	0.002	0.004	0.014	0.101	0.001	0.085	292.352	0.599	0.1084208E-02	5.210872	0.2453247E-01	-0.6728310
05192011	11	0.000	0.179	0.139	0.000	0.002	0.001	0.003	0.011	0.085	0.001	0.085	294.249	0.547	0.1369715E-03	4.630814	0.5148360E-02	-0.4601152E-01
05192011	12	0.000	0.203	0.160	0.000	0.001	0.001	0.003	0.011	0.079	0.001	0.084	296.002	0.502	0.5894899E-04	3.838744	0.2018945E-02	0.2790647
05192011	13	0.000	0.202	0.175	0.000	0.001	0.001	0.003	0.010	0.071	0.000	0.080	297.843	0.455	0.2318621E-04	3.206097	0.1060825E-02	0.4803329
05192011	14	0.000	0.187	0.180	0.000	0.001	0.001	0.003	0.010	0.064	0.000	0.077	298.759	0.432	0.7808208E-05	2.757759	0.7064021E-03	0.5915043
05192011	15	0.000	0.177	0.186	0.000	0.001	0.001	0.003	0.009	0.063	0.000	0.079	298.960	0.423	0.1549721E-05	2.955884	0.1784629E-02	0.2191396
05192011	16	0.000	0.174	0.186	0.000	0.001	0.001	0.003	0.010	0.066	0.000	0.083	298.631	0.426	0.2145767E-05	3.192977	0.1927398E-02	0.2192244
05192011	17	0.000	0.176	0.177	0.000	0.001	0.001	0.003	0.010	0.069	0.000	0.085	298.056	0.430	0.2980232E-05	3.201075	0.1361931E-02	0.3711409
05192011	18	0.000	0.180	0.165	0.000	0.001	0.001	0.003	0.011	0.073	0.000	0.087	297.377	0.435	0.9477139E-05	3.248501	0.8823060E-03	0.5660638
05192011	19	0.000	0.185	0.144	0.000	0.001	0.002	0.004	0.015	0.088	0.000	0.087	296.486	0.436	0.5644560E-04	2.979905	0.4431074E-02	-0.1723066
05192011	20	0.004	0.192	0.150	0.000	0.002	0.003	0.006	0.023	0.119	0.002	0.087	294.288	0.465	0.1827735E-01	4.904887	0.6838713E-02	-0.1443453
05192011	21	0.030	0.184	0.170	0.000	0.002	0.003	0.007	0.027	0.108	0.006	0.084	292.366	0.512	NaN	4.726324	0.1359360	-1.458811
05192011	22	0.036	0.163	0.190	0.000	0.002	0.003	0.007	0.028	0.102	0.012	0.080	290.932	0.563	NaN	5.481208	0.1519865	-1.442929
05192011	23	0.032	0.141	0.195	0.000	0.002	0.003	0.007	0.028	0.099	0.018	0.075	289.822	0.617	NaN	6.383047	0.1598340	-1.398641
05192011	24	0.026	0.118	0.188	0.000	0.002	0.003	0.007	0.028	0.097	0.023	0.072	288.818	0.680	NaN	7.488957	0.1594172	-1.328114
05202011	01	0.018	0.093	0.160	0.001	0.002	0.002	0.007	0.026	0.096	0.025	0.068	287.868	0.755	0.1809472	8.702797	0.2850325E-03	1.484764
05202011	02	0.014	0.070	0.117	0.001	0.002	0.002	0.006	0.024	0.094	0.025	0.065	287.320	0.804	0.2086548	9.985597	0.3091316E-03	1.509231
05202011	03	0.014	0.051	0.079	0.001	0.002	0.002	0.006	0.022	0.091	0.022	0.062	287.091	0.823	0.2650393	10.62529	0.2478708E-03	1.632115
05202011	04	0.017	0.040	0.053	0.002	0.002	0.002	0.006	0.021	0.090	0.020	0.060	286.978	0.831	0.3554648	11.00691	0.1670054E-03	1.818935
05202011	05	0.027	0.039	0.038	0.003	0.002	0.002	0.006	0.021	0.090	0.024	0.059	286.922	0.835	0.4843045	12.16387	0.1073006E-03	2.054470
05202011	06	0.046	0.044	0.025	0.005	0.002	0.003	0.007	0.025	0.089	0.032	0.059	286.936	0.844	0.6559858	12.61389	0.4659726E-04	2.432489
05202011	07	0.061	0.049	0.019	0.006	0.002	0.005	0.008	0.031	0.081	0.039	0.059	288.282	0.849	0.6918963	12.78587	0.2683615E-04	2.678010
05202011	08	0.062	0.048	0.033	0.004	0.002	0.005	0.009	0.034	0.060	0.029	0.058	292.091	0.731	0.2611004	4.434947	0.1742321E-04	2.405760
05202011	09	0.024	0.041	0.077	0.001	0.002	0.003	0.006	0.020	0.071	0.007	0.058	294.996	0.615	0.3979826E-01	3.684345	0.2137907E-03	1.236371
05202011	10	0.004	0.092	0.135	0.000	0.001	0.002	0.004	0.015	0.089	0.003	0.066	297.361	0.521	0.1069432E-01	3.523124	0.5753824E-02	-0.2130286
05202011	11	0.001	0.170	0.184	0.000	0.001	0.002	0.004	0.013	0.087	0.001	0.082	299.441	0.451	0.6693602E-04	2.941460	0.5009174E-02	-0.2312032
05202011	12	0.000	0.194	0.178	0.000	0.001	0.002	0.004	0.011	0.082	0.001	0.096	301.168	0.404	0.1013279E-04	3.118136	0.6837233E-03	0.6590147
05202011	13	0.000	0.203	0.176	0.000	0.002	0.001	0.004	0.011	0.081	0.000	0.109	302.905	0.362	0.5960464E-07	3.730142	0.9203298E-02	-0.3922181
05202011	14	0.000	0.204	0.175	0.000	0.002	0.001	0.004	0.011	0.079	0.000	0.115	303.876	0.339	0.5960464E-07	4.164937	0.1719686E-01	-0.6158407
05202011	15	0.000	0.178	0.151	0.000	0.002	0.001	0.004	0.010	0.071	0.000	0.110	303.874	0.332	0.000000	4.188898	0.2121147E-01	-0.7044710
05202011	16	0.000	0.154	0.138	0.000	0.002	0.001	0.004	0.010	0.069	0.001	0.105	302.298	0.344	0.1192093E-06	3.990417	0.1821749E-01	-0.6594703
05202011	17	0.000	0.159	0.138	0.000	0.002	0.002	0.004	0.013	0.081	0.001	0.111	301.830	0.361	0.2384186E-06	3.716425	0.7228978E-02	-0.2889515
05202011	18	0.000	0.171	0.123	0.000	0.002	0.002	0.005	0.017	0.097	0.001	0.113	301.416	0.372	0.1275539E-04	3.075286	0.7335922E-03	0.6224309
05202011	19	0.003	0.176	0.105	0.000	0.002	0.003	0.007	0.026	0.124	0.001	0.112	299.737	0.423	0.2233386E-03	3.502482	0.2345090E-01	-0.8257836
05202011	20	0.019	0.195	0.125	0.000	0.003	0.004	0.009	0.035	0.145	0.002	0.111	297.318	0.435	0.2546930E-01	7.621029	0.1001487E-01	-0.1186317
05202011	21	0.044	0.203	0.142	0.000	0.003	0.004	0.010	0.037	0.129	0.004	0.110	295.294	0.462	NaN	5.076488	0.9422953E-01	-1.268624
05202011	22	0.054	0.185	0.154	0.000	0.003	0.005	0.010	0.039	0.124	0.007	0.108	293.586	0.518	NaN	6.353656	0.9308098E-01	-1.165837
05202011	23	0.056	0.148	0.152	0.000	0.003	0.005	0.011	0.039	0.120	0.013	0.104	292.332	0.580	NaN	7.652910	0.8874099E-01	-1.064298
05202011	24	0.050	0.105	0.138	0.000	0.003	0.004	0.010	0.034	0.120	0.018	0.096	291.362	0.642	NaN	8.955812	0.8156752E-01	-0.9594123
05212011	01	0.053	0.071	0.095	0.001	0.003	0.004	0.009	0.030	0.110	0.021	0.085	290.549	0.705	0.3020059	8.884010	0.1227566E-03	1.859564
05212011	02	0.060	0.050	0.053	0.001	0.002	0.004	0.009	0.028	0.096	0.020	0.075	289.991	0.750	0.4086319	8.890846	0.7136854E-04	2.095436
05212011	03	0.065	0.040	0.030	0.001	0.002	0.004	0.008	0.026	0.085	0.015	0.069	289.662	0.774	0.4590805	8.345101	0.5406695E-04	2.188500
05212011	04	0.067	0.036	0.020	0.002	0.002	0.003	0.008	0.023	0.080	0.012	0.065	289.443	0.792	0.4838722	8.471411	0.5270132E-04	2.206134
05212011	05	0.068	0.037	0.017	0.002	0.002	0.003	0.008	0.022	0.078	0.011	0.063	289.295	0.806	0.5233108	9.080896	0.4843407E-04	2.272978
05212011	06	0.071	0.040	0.015	0.002	0.002	0.003	0.008	0.022	0.076	0.011	0.062	289.301	0.817	0.5466107	9.339133	0.4421446E-04	2.324742
05212011	07	0.075	0.047	0.017	0.002	0.002	0.003	0.008	0.024	0.076	0.015	0.062	290.492	0.827	0.5144409	9.738589	0.4167576E-04	2.368613
05212011	08	0.076	0.048	0.028	0.002	0.003	0.004	0.010	0.028	0.068	0.016	0.063	294.453	0.738	0.2019404	5.483423	0.4150808E-04	2.120919
05212011	09	0.039	0.035	0.057	0.001	0.002	0.003	0.008	0.020	0.078	0.006	0.064	297.113	0.630	0.3892320E-01	4.283110	0.2005949E-03	1.329439
05212011	10	0.025	0.052	0.091	0.000	0.002	0.002	0.006	0.015	0.092	0.003	0.066	299.502	0.535	NaN	4.422592	0.6109584E-01	-1.140335
05212011	11	0.009	0.143	0.138	0.000	0.002	0.002	0.005	0.013	0.114	0.002	0.076	301.763	0.454	0.1056165E-01	4.425429	0.8666724E-02	-0.2918996
05212011	12	0.001	0.222	0.159	0.000	0.002	0.002	0.004	0.011	0.109	0.001	0.088	303.352	0.411	0.6395578E-04	2.827898	0.1099383E-01	-0.5896853
05212011	13	0.001	0.248	0.152	0.000	0.002	0.002	0.004	0.010	0.097	0.001	0.097	304.943	0.372	0.2050400E-04	2.762989	0.1421060E-02	0.2887667
05212011	14	0.000	0.250	0.137	0.000	0.002	0.002	0.004	0.009	0.088	0.001	0.097	305.807	0.352	0.7808208E-05	2.599087	0.6881350E-03	0.5771472
05212011	15	0.000	0.238	0.119	0.000	0.002	0.001	0.003	0.009	0.079	0.001	0.092	305.680	0.352	0.2086163E-05	2.415497	0.4461955E-03	0.7334814
05212011	16	0.000	0.223	0.104	0.000	0.002	0.001	0.003	0.008	0.075	0.001	0.086	305.121	0.362	0.3218651E-05	2.395530	0.4955663E-03	0.6842997
05212011	17	0.000	0.209	0.090	0.000	0.002	0.001	0.003	0.008	0.074	0.001	0.082	304.150	0.377	0.7390976E-05	2.474178	0.6603188E-03	0.5736774
05212011	18	0.001	0.204	0.072	0.000	0.002	0.002	0.003	0.009	0.081	0.001	0.081	302.946	0.397	0.2819300E-04	2.618258	0.1616237E-02	0.2095076
05212011	19	0.007	0.203	0.053	0.000	0.002	0.002	0.004	0.014	0.108	0.001	0.081	301.029	0.450	0.1389921E-02	3.501195	0.9346484E-02	-0.4264320
05212011	20	0.038	0.210	0.048	0.000	0.003	0.003	0.006	0.020	0.103	0.002	0.078	298.315	0.484	NaN	4.375034	0.7396518E-02	-0.2280458
05212011	21	0.045	0.218	0.041	0.000	0.002	0.003	0.006	0.019	0.095	0.002	0.073	296.465	0.522	NaN	4.744689	0.1346080E-02	0.5471367
05212011	22	0.046	0.219	0.034	0.000	0.002	0.003	0.005	0.018	0.090	0.002	0.068	295.100	0.565	NaN	4.967205	0.4584932E-03	1.034779
05212011	23	0.045	0.219	0.032	0.001	0.002	0.003	0.005	0.016	0.087	0.002	0.065	293.993	0.612	0.8544207E-01	4.552603	0.2010588E-03	1.354937
05212011	24	0.045	0.219	0.033	0.001	0.002	0.002	0.005	0.016	0.085	0.003	0.063	293.040	0.667	0.1218684	5.258901	0.1769442E-03	1.473059
05222011	01	0.041	0.229	0.036	0.001	0.002	0.002	0.005	0.016	0.086	0.004	0.062	292.184	0.731	0.1710129	6.476324	0.1580299E-03	1.612589
05222011	02	0.034	0.252	0.040	0.001	0.002	0.002	0.004	0.015	0.089	0.006	0.062	291.604	0.776	0.1960965	8.229104	0.1902853E-03	1.635947
05222011	03	0.029	0.278	0.046	0.001	0.002	0.002	0.004	0.015	0.092	0.008	0.062	291.297	0.796	0.2072563	9.218761	0.2059739E-03	1.650860
05222011	04	0.026	0.300	0.051	0.001	0.002	0.002	0.004	0.015	0.094	0.009	0.062	291.097	0.808	0.2120020	9.838939	0.2190061E-03	1.652492
05222011	05	0.028	0.315	0.054	0.001	0.002	0.002	0.005	0.016	0.095	0.011	0.062	290.948	0.819	0.2526513	10.59573	0.1826806E-03	1.763438
05222011	06	0.034	0.323	0.052	0.002	0.002	0.002	0.005	0.018	0.095	0.015	0.062	290.949	0.830	0.3106090	11.37566	0.1391856E-03	1.912382
05222011	07	0.042	0.322	0.052	0.002	0.002	0.003	0.006	0.021	0.095	0.022	0.063	292.196	0.838	0.3386720	12.28249	0.1016576E-03	2.082146
05222011	08	0.051	0.268	0.066	0.002	0.003	0.003	0.007	0.025	0.086	0.023	0.063	295.770	0.775	0.1556920	7.293225	0.7980272E-04	1.960902
05222011	09	0.012	0.249	0.084	0.000	0.002	0.002	0.005	0.016	0.082	0.005	0.061	298.955	0.676	0.2697295E-01	8.283544	0.7840561E-02	0.2386902E-01
05222011	10	0.001	0.333	0.101	0.000	0.002	0.002	0.003	0.011	0.068	0.002	0.064	301.010	0.579	0.2356768E-03	3.655268	0.6194107E-02	-0.2290595
05222011	11	0.000	0.411	0.103	0.000	0.002	0.001	0.002	0.007	0.048	0.001	0.068	302.663	0.518	0.3397465E-05	4.208968	0.7925780E-02	-0.2748664
05222011	12	0.000	0.315	0.091	0.000	0.002	0.001	0.002	0.006	0.041	0.001	0.062	304.312	0.467	0.1013279E-05	3.496957	0.9494157E-02	-0.4337661
05222011	13	0.000	0.235	0.072	0.000	0.002	0.001	0.002	0.005	0.037	0.001	0.054	305.865	0.421	0.2980232E-06	2.502018	0.6254287E-02	-0.3978873
05222011	14	0.000	0.190	0.056	0.000	0.002	0.001	0.002	0.005	0.035	0.001	0.048	306.645	0.399	0.2384186E-06	1.840104	0.2246545E-02	-0.8667274E-01
05222011	15	0.000	0.145	0.044	0.000	0.002	0.001	0.002	0.005	0.034	0.001	0.048	306.283	0.400	0.1788139E-06	1.911776	0.3205566E-02	-0.2244678
05222011	16	0.000	0.102	0.039	0.000	0.001	0.001	0.002	0.004	0.036	0.001	0.054	305.592	0.409	0.1788139E-06	2.666886	0.9241816E-02	-0.5397529
05222011	17	0.000	0.078	0.035	0.000	0.001	0.001	0.001	0.004	0.040	0.000	0.058	304.650	0.415	0.2980232E-06	2.972934	0.1030823E-01	-0.5399991
05222011	18	0.000	0.065	0.032	0.001	0.001	0.001	0.002	0.005	0.053	0.000	0.060	303.559	0.422	0.000000	2.192450	0.6515565E-03	0.5269776
05222011	19	0.005	0.070	0.031	0.001	0.002	0.002	0.003	0.009	0.082	0.000	0.061	301.693	0.479	0.000000	2.986025	0.7868056E-02	-0.4207740
05222011	20	0.026	0.082	0.032	0.001	0.002	0.002	0.003	0.011	0.088	0.001	0.060	299.140	0.504	0.1784605E-01	3.236737	0.3422485E-03	0.9757658
05222011	21	0.034	0.092	0.030	0.001	0.002	0.002	0.003	0.010	0.086	0.001	0.057	297.368	0.533	0.2087909E-01	3.385313	0.3828734E-03	0.9465436
05222011	22	0.041	0.094	0.029	0.001	0.002	0.002	0.003	0.009	0.082	0.001	0.054	295.914	0.575	0.3953493E-01	3.658804	0.2708118E-03	1.130672
05222011	23	0.045	0.098	0.026	0.001	0.002	0.002	0.003	0.009	0.075	0.001	0.050	294.702	0.625	0.6689489E-01	4.010682	0.1841859E-03	1.337962
05222011	24	0.044	0.113	0.023	0.001	0.002	0.001	0.003	0.010	0.063	0.002	0.044	293.683	0.679	0.8258235E-01	3.863174	0.1394690E-03	1.442467
05232011	01	0.043	0.124	0.021	0.001	0.002	0.001	0.003	0.010	0.050	0.002	0.038	292.760	0.743	0.1053187	3.971494	0.9859721E-04	1.605089
05232011	02	0.040	0.141	0.019	0.001	0.002	0.001	0.003	0.010	0.039	0.002	0.032	292.089	0.788	0.1219354	3.883225	0.6678680E-04	1.764502
05232011	03	0.040	0.159	0.018	0.001	0.002	0.001	0.003	0.011	0.031	0.002	0.028	291.685	0.811	0.1288379	3.367393	0.4188320E-04	1.905254
05232011	04	0.047	0.173	0.016	0.001	0.002	0.001	0.003	0.011	0.025	0.002	0.026	291.422	0.822	0.1467757	3.173134	0.3011225E-04	2.022745
05232011	05	0.068	0.177	0.014	0.001	0.002	0.002	0.004	0.013	0.019	0.003	0.025	291.166	0.836	0.2451158	3.154698	0.1052400E-04	2.476777
05232011	06	0.102	0.177	0.011	0.001	0.002	0.002	0.005	0.016	0.013	0.004	0.026	291.175	0.834	0.3050425	2.631418	0.4527682E-05	2.764314
05232011	07	0.126	0.185	0.015	0.002	0.002	0.004	0.006	0.019	0.011	0.009	0.026	292.368	0.848	0.4090580	3.151297	0.1934459E-05	3.211930
05232011	08	0.103	0.187	0.033	0.001	0.003	0.004	0.006	0.021	0.010	0.010	0.028	296.071	0.726	0.1107304	1.351230	0.1238282E-05	3.037910
05232011	09	0.038	0.231	0.050	0.001	0.002	0.002	0.004	0.013	0.026	0.003	0.029	298.316	0.644	0.1347899E-01	1.661234	0.6056272E-04	1.438225
05232011	10	0.002	0.259	0.066	0.000	0.002	0.001	0.002	0.007	0.037	0.001	0.033	300.315	0.582	0.4574060E-03	1.935345	0.5025032E-02	-0.4143805
05232011	11	0.001	0.218	0.081	0.000	0.001	0.001	0.002	0.006	0.034	0.001	0.036	302.326	0.512	0.4863739E-04	1.640246	0.1885336E-02	-0.6048002E-01
05232011	12	0.000	0.145	0.081	0.000	0.001	0.001	0.002	0.005	0.031	0.001	0.036	303.859	0.461	0.1585484E-04	1.452703	0.8621200E-03	0.2266091
05232011	13	0.000	0.117	0.076	0.000	0.001	0.001	0.002	0.005	0.031	0.000	0.037	305.219	0.426	0.9179115E-05	1.343339	0.6871511E-03	0.2911335
05232011	14	0.000	0.112	0.072	0.000	0.001	0.001	0.002	0.005	0.035	0.000	0.039	305.876	0.411	0.1031160E-04	1.303533	0.7998992E-03	0.2120867
05232011	15	0.001	0.113	0.067	0.000	0.001	0.001	0.002	0.005	0.041	0.000	0.041	305.667	0.416	0.1966953E-04	1.402133	0.1440299E-02	-0.1166342E-01
05232011	16	0.001	0.108	0.056	0.000	0.001	0.001	0.001	0.004	0.045	0.000	0.040	305.029	0.427	0.2622604E-04	1.448803	0.2153276E-02	-0.1720902
05232011	17	0.001	0.101	0.046	0.000	0.001	0.001	0.002	0.004	0.048	0.000	0.042	303.972	0.446	0.3749132E-04	1.623305	0.2632437E-02	-0.2099577
05232011	18	0.001	0.101	0.036	0.000	0.001	0.001	0.002	0.006	0.055	0.000	0.047	302.762	0.466	0.5382299E-04	1.857344	0.4440837E-02	-0.3785725
05232011	19	0.012	0.128	0.032	0.001	0.001	0.001	0.003	0.011	0.068	0.001	0.049	301.222	0.512	0.1186728E-03	3.850192	0.6650437E-02	-0.2373678
05232011	20	0.045	0.149	0.026	0.001	0.002	0.002	0.004	0.017	0.057	0.001	0.051	299.176	0.541	0.1468557E-01	2.522069	0.2032309E-03	1.093767
05232011	21	0.037	0.166	0.023	0.001	0.002	0.002	0.004	0.016	0.060	0.001	0.051	297.539	0.563	0.1843739E-01	2.747500	0.2369569E-03	1.064268
05232011	22	0.029	0.169	0.023	0.001	0.002	0.002	0.004	0.015	0.063	0.001	0.050	296.289	0.593	0.2398890E-01	2.999774	0.2521836E-03	1.075372
05232011	23	0.025	0.157	0.024	0.001	0.002	0.002	0.004	0.014	0.063	0.001	0.049	295.185	0.649	0.3436482E-01	3.593960	0.2493873E-03	1.158699
05232011	24	0.023	0.137	0.026	0.000	0.002	0.001	0.004	0.014	0.061	0.001	0.048	294.245	0.706	NaN	5.465004	0.2591192E-02	0.3240908
05242011	01	0.021	0.113	0.027	0.000	0.002	0.001	0.004	0.014	0.058	0.002	0.046	293.471	0.762	NaN	6.378286	0.3844560E-02	0.2198574
05242011	02	0.018	0.100	0.027	0.000	0.002	0.001	0.004	0.014	0.055	0.002	0.044	292.976	0.801	NaN	7.192578	0.4736940E-02	0.1813867
05242011	03	0.018	0.106	0.029	0.000	0.002	0.001	0.004	0.014	0.053	0.002	0.043	292.749	0.816	NaN	7.843606	0.5790639E-02	0.1317893
05242011	04	0.026	0.119	0.030	0.000	0.002	0.001	0.004	0.015	0.050	0.003	0.043	292.596	0.824	NaN	8.399817	0.2959676E-02	0.4530256
05242011	05	0.046	0.130	0.029	0.001	0.002	0.002	0.005	0.017	0.048	0.006	0.043	292.463	0.832	0.2053869	6.106234	0.5656730E-04	2.033208
05242011	06	0.078	0.140	0.024	0.001	0.002	0.003	0.006	0.021	0.043	0.009	0.044	292.334	0.850	0.3630061	6.959425	0.2446553E-04	2.454019
05242011	07	0.095	0.145	0.025	0.002	0.003	0.004	0.007	0.026	0.041	0.016	0.047	293.562	0.859	0.3993686	7.762770	0.1741184E-04	2.649172
05242011	08	0.075	0.144	0.041	0.002	0.003	0.005	0.008	0.029	0.036	0.014	0.050	296.532	0.750	0.1088254	3.607144	0.1782885E-04	2.306040
05242011	09	0.011	0.216	0.066	0.001	0.003	0.002	0.005	0.016	0.060	0.003	0.057	298.704	0.659	0.7045269E-04	4.510443	0.4697096E-02	-0.1761020E-01
05242011	10	0.001	0.235	0.075	0.000	0.002	0.001	0.003	0.009	0.052	0.001	0.060	300.368	0.585	0.1015663E-03	3.770208	0.2513049E-02	0.1761643
05242011	11	0.000	0.176	0.074	0.000	0.001	0.001	0.003	0.007	0.047	0.001	0.062	301.955	0.523	0.5662441E-05	3.479618	0.3216058E-02	0.3420779E-01
05242011	12	0.000	0.132	0.070	0.000	0.001	0.001	0.002	0.006	0.045	0.000	0.062	303.371	0.472	0.1072884E-05	3.266321	0.6505514E-02	-0.2992227
05242011	13	0.000	0.110	0.062	0.000	0.001	0.001	0.002	0.005	0.045	0.000	0.059	304.590	0.434	0.4768372E-06	2.634981	0.4333690E-02	-0.2160803
05242011	14	0.000	0.105	0.058	0.000	0.001	0.001	0.002	0.005	0.049	0.000	0.058	305.252	0.413	0.3218651E-05	2.067679	0.6063452E-03	0.5327632
05242011	15	0.000	0.094	0.052	0.000	0.001	0.001	0.002	0.005	0.050	0.000	0.054	305.108	0.410	0.9536743E-05	1.863025	0.7640945E-03	0.3870717
05242011	16	0.001	0.084	0.045	0.000	0.001	0.001	0.002	0.004	0.050	0.000	0.052	304.610	0.416	0.1406670E-04	1.888116	0.9450716E-03	0.3005641
05242011	17	0.001	0.078	0.039	0.000	0.001	0.001	0.002	0.004	0.049	0.000	0.049	303.796	0.422	0.1764297E-04	1.758604	0.1113932E-02	0.1983093
05242011	18	0.001	0.079	0.034	0.000	0.001	0.001	0.002	0.006	0.053	0.000	0.047	302.884	0.434	0.3308058E-04	1.613292	0.3003271E-02	-0.2698816
05242011	19	0.013	0.090	0.029	0.001	0.001	0.001	0.003	0.011	0.062	0.000	0.047	301.464	0.476	0.1000762E-03	3.287950	0.6448757E-02	-0.2925508
05242011	20	0.046	0.104	0.023	0.001	0.002	0.002	0.004	0.018	0.047	0.001	0.046	298.944	0.506	0.1355565E-01	1.918040	0.1555053E-03	1.091113
05242011	21	0.045	0.123	0.023	0.001	0.002	0.002	0.004	0.017	0.047	0.001	0.044	296.986	0.551	0.2068478E-01	2.083006	0.1277281E-03	1.212404
05242011	22	0.034	0.130	0.024	0.001	0.001	0.002	0.004	0.014	0.051	0.001	0.043	295.556	0.593	0.2660197E-01	2.490160	0.1661495E-03	1.175728
05242011	23	0.030	0.132	0.027	0.000	0.001	0.001	0.004	0.014	0.052	0.001	0.043	294.518	0.632	NaN	3.801861	0.7566745E-03	0.7010871
05242011	24	0.024	0.146	0.031	0.000	0.001	0.001	0.003	0.013	0.053	0.001	0.043	293.637	0.676	NaN	4.463284	0.6300076E-02	-0.1496912
05252011	01	0.021	0.165	0.035	0.000	0.001	0.001	0.004	0.013	0.054	0.002	0.043	292.794	0.728	NaN	5.335871	0.1057526E-01	-0.2970857
05252011	02	0.024	0.174	0.037	0.000	0.001	0.001	0.004	0.014	0.052	0.002	0.043	292.124	0.768	NaN	6.423476	0.9289761E-02	-0.1602344
05252011	03	0.027	0.182	0.037	0.000	0.001	0.001	0.004	0.015	0.051	0.003	0.043	291.672	0.792	NaN	7.274214	0.6823688E-02	0.2776688E-01
05252011	04	0.035	0.179	0.032	0.001	0.002	0.001	0.005	0.017	0.049	0.005	0.043	291.304	0.811	0.1749516	5.373617	0.7567648E-04	1.851306
05252011	05	0.056	0.166	0.023	0.001	0.002	0.002	0.005	0.019	0.045	0.006	0.043	291.031	0.823	0.2842925	5.542218	0.3681792E-04	2.177624
05252011	06	0.092	0.148	0.015	0.002	0.002	0.003	0.006	0.022	0.038	0.007	0.043	290.902	0.835	0.4431909	5.881451	0.1549757E-04	2.579221
05252011	07	0.121	0.129	0.018	0.002	0.002	0.004	0.007	0.026	0.034	0.015	0.043	292.111	0.838	0.4702090	5.848065	0.8496300E-05	2.837782
05252011	08	0.105	0.113	0.038	0.002	0.002	0.005	0.007	0.029	0.026	0.017	0.043	295.809	0.740	0.1436613	2.681770	0.5215311E-05	2.711141
05252011	09	0.023	0.096	0.059	0.000	0.002	0.002	0.004	0.015	0.043	0.003	0.040	298.417	0.630	NaN	3.483778	0.3107924E-01	-0.9504198
05252011	10	0.001	0.117	0.069	0.000	0.001	0.001	0.002	0.008	0.040	0.001	0.039	300.728	0.541	0.9095669E-04	1.830550	0.4249888E-02	-0.3657959
05252011	11	0.000	0.122	0.082	0.000	0.001	0.001	0.002	0.006	0.034	0.001	0.040	302.671	0.475	0.1978874E-04	1.712984	0.9369093E-03	0.2620557
05252011	12	0.000	0.093	0.084	0.000	0.001	0.001	0.002	0.005	0.034	0.001	0.043	304.369	0.425	0.4351139E-05	1.633152	0.5734683E-03	0.4545171
05252011	13	0.000	0.078	0.070	0.000	0.001	0.001	0.002	0.005	0.036	0.000	0.045	305.928	0.382	0.1430511E-05	1.390425	0.4097153E-03	0.5306652
05252011	14	0.000	0.077	0.057	0.000	0.001	0.001	0.002	0.004	0.038	0.000	0.045	306.696	0.363	0.1847744E-05	1.265077	0.3670507E-03	0.5373911
05252011	15	0.000	0.078	0.051	0.001	0.001	0.001	0.002	0.004	0.040	0.000	0.046	306.431	0.372	0.000000	1.368346	0.4510974E-03	0.4819255
05252011	16	0.000	0.079	0.049	0.000	0.001	0.001	0.002	0.005	0.043	0.000	0.047	305.834	0.386	0.7748604E-05	1.475706	0.6935121E-03	0.3279459
05252011	17	0.001	0.077	0.046	0.001	0.001	0.001	0.002	0.005	0.045	0.000	0.047	304.918	0.399	0.000000	1.521158	0.9623423E-03	0.1988447
05252011	18	0.001	0.078	0.039	0.001	0.001	0.001	0.002	0.007	0.053	0.000	0.048	303.960	0.411	0.000000	1.492486	0.2685352E-02	-0.2550910
05252011	19	0.015	0.084	0.034	0.001	0.002	0.002	0.004	0.012	0.062	0.001	0.048	302.351	0.465	0.9474039E-02	2.180909	0.1576840E-03	1.140850
05252011	20	0.041	0.089	0.024	0.001	0.002	0.002	0.005	0.017	0.052	0.001	0.048	299.744	0.510	0.1232308E-01	2.093555	0.1525457E-03	1.137485
05252011	21	0.019	0.092	0.018	0.002	0.002	0.002	0.004	0.013	0.063	0.001	0.048	298.096	0.542	0.1916629E-01	2.594219	0.2004947E-03	1.111904
05252011	22	0.005	0.100	0.017	0.002	0.002	0.001	0.004	0.010	0.069	0.001	0.049	297.059	0.575	0.2605915E-03	3.707815	0.4705235E-02	-0.1034633
05252011	23	0.003	0.108	0.019	0.002	0.002	0.001	0.004	0.009	0.075	0.001	0.054	296.384	0.605	0.000000	3.865730	0.5452645E-02	-0.1493758
05252011	24	0.004	0.099	0.017	0.004	0.002	0.001	0.004	0.009	0.085	0.001	0.059	297.882	0.557	0.000000	3.733806	0.5807649E-02	-0.1918486
05262011	01	0.003	0.080	0.013	0.006	0.003	0.001	0.003	0.009	0.084	0.001	0.060	297.317	0.579	0.000000	3.954751	0.6960704E-02	-0.2455341
05262011	02	0.001	0.070	0.013	0.005	0.002	0.001	0.003	0.007	0.071	0.001	0.058	296.644	0.619	0.000000	3.951230	0.1388657E-01	-0.5458627
05262011	03	0.001	0.067	0.012	0.005	0.002	0.001	0.002	0.007	0.064	0.001	0.056	295.978	0.659	0.000000	4.453160	0.1167347E-01	-0.4185315
05262011	04	0.001	0.072	0.013	0.004	0.002	0.001	0.003	0.007	0.065	0.001	0.055	295.425	0.689	0.000000	4.818948	0.1059591E-01	-0.3421862
05262011	05	0.002	0.094	0.015	0.004	0.002	0.001	0.003	0.009	0.071	0.001	0.055	294.928	0.726	0.000000	5.668288	0.7206128E-02	-0.1042501
05262011	06	0.010	0.120	0.016	0.003	0.003	0.002	0.004	0.012	0.078	0.001	0.056	294.547	0.762	0.1104474E-02	9.666805	0.5033082E-02	0.2834490
05262011	07	0.029	0.139	0.020	0.003	0.003	0.003	0.005	0.016	0.066	0.003	0.054	295.086	0.776	0.8052623E-01	6.241696	0.1790940E-03	1.542222
05262011	08	0.015	0.137	0.031	0.003	0.002	0.003	0.004	0.014	0.061	0.002	0.049	297.150	0.714	0.2235985E-01	4.389666	0.3107539E-03	1.150015
05262011	09	0.002	0.116	0.043	0.001	0.001	0.001	0.002	0.008	0.045	0.001	0.041	298.584	0.684	0.000000	3.234200	0.6081385E-02	-0.2742356
05262011	10	0.000	0.082	0.057	0.000	0.001	0.001	0.002	0.005	0.033	0.001	0.039	300.279	0.632	0.8052588E-04	2.957980	0.2088188E-02	0.1512257
05262011	11	0.000	0.062	0.069	0.000	0.001	0.001	0.001	0.004	0.029	0.000	0.037	301.799	0.588	0.1746416E-04	2.614966	0.2080100E-02	0.9938179E-01
05262011	12	0.000	0.035	0.064	0.000	0.001	0.001	0.001	0.003	0.025	0.000	0.033	298.874	0.715	0.1047850E-03	3.913368	0.4542335E-02	-0.6472849E-01
05262011	13	0.000	0.018	0.055	0.001	0.001	0.001	0.001	0.001	0.024	0.000	0.027	299.385	0.681	0.000000	2.769881	0.2352197E-02	0.7098739E-01
05262011	14	0.001	0.020	0.055	0.001	0.001	0.001	0.001	0.001	0.031	0.000	0.028	300.651	0.633	0.000000	2.286119	0.2774324E-02	-0.8405834E-01
05262011	15	0.003	0.030	0.070	0.001	0.001	0.001	0.001	0.001	0.042	0.000	0.027	299.762	0.650	0.000000	2.557903	0.4450836E-02	-0.2405576
05262011	16	0.007	0.037	0.069	0.001	0.001	0.001	0.001	0.001	0.042	0.001	0.024	298.234	0.689	0.9410441E-02	2.662941	0.3134352E-03	0.9292138
05262011	17	0.011	0.039	0.062	0.001	0.001	0.001	0.000	0.001	0.037	0.001	0.021	296.571	0.742	0.1077437E-01	2.759704	0.3219080E-03	0.9331309
05262011	18	0.014	0.043	0.057	0.000	0.001	0.001	0.000	0.001	0.035	0.001	0.020	294.829	0.798	NaN	4.709431	0.3975038E-01	-0.9263729
05262011	19	0.020	0.045	0.052	0.000	0.001	0.001	0.001	0.001	0.036	0.003	0.020	293.071	0.862	NaN	8.052065	0.2579303E-01	-0.5055950
05262011	20	0.023	0.048	0.046	0.000	0.001	0.001	0.001	0.001	0.040	0.007	0.019	291.733	0.913	NaN	15.06385	0.1412607E-01	0.2791481E-01
05262011	21	0.020	0.059	0.042	0.001	0.001	0.001	0.001	0.001	0.053	0.021	0.019	291.027	0.940	0.3899666	20.67015	0.1425007E-03	2.161527
05262011	22	0.016	0.077	0.039	0.002	0.001	0.001	0.001	0.001	0.067	0.034	0.019	290.646	0.957	0.5477067	43.23384	0.3203753E-03	2.130165
05262011	23	0.012	0.097	0.047	0.002	0.001	0.001	0.001	0.001	0.071	0.034	0.021	290.578	0.956	0.4829593	43.99056	0.4311197E-03	2.008762
05262011	24	0.009	0.118	0.049	0.001	0.001	0.001	0.001	0.001	0.065	0.023	0.023	290.613	0.954	0.3571990	28.23312	0.3090377E-03	1.960747
05272011	01	0.006	0.127	0.043	0.001	0.001	0.001	0.001	0.001	0.057	0.010	0.026	290.615	0.962	0.2549468	29.27238	0.5218121E-03	1.748944
05272011	02	0.004	0.115	0.036	0.000	0.001	0.000	0.001	0.001	0.049	0.004	0.025	290.925	0.961	NaN	25.00191	0.2026118E-01	0.9130842E-01
05272011	03	0.003	0.100	0.030	0.000	0.001	0.000	0.001	0.001	0.042	0.002	0.022	291.181	0.962	NaN	21.05145	0.1616380E-01	0.1147387
05272011	04	0.008	0.096	0.027	0.001	0.001	0.000	0.001	0.001	0.041	0.005	0.020	291.068	0.968	0.2751901	29.33998	0.4058734E-03	1.859069
05272011	05	0.022	0.099	0.019	0.002	0.001	0.001	0.001	0.001	0.047	0.014	0.018	290.936	0.976	0.7587159	67.96742	0.2522467E-03	2.430475
05272011	06	0.054	0.112	0.010	0.003	0.001	0.002	0.001	0.001	0.056	0.025	0.018	290.966	0.981	0.9318349	81.17654	0.8484380E-04	2.980810
05272011	07	0.077	0.131	0.008	0.004	0.001	0.003	0.001	0.002	0.067	0.037	0.018	292.422	0.973	0.9066824	60.08640	0.6001146E-04	3.000542
05272011	08	0.005	0.140	0.022	0.000	0.000	0.001	0.000	0.001	0.036	0.003	0.027	293.873	0.907	0.1551294E-01	9.137920	0.4485270E-02	0.3090587
05272011	09	0.000	0.078	0.029	0.000	0.000	0.000	0.000	0.001	0.026	0.000	0.038	294.795	0.849	0.6576180E-03	9.592041	0.1650754E-01	-0.2357714
05272011	10	0.000	0.071	0.048	0.000	0.000	0.000	0.000	0.001	0.029	0.000	0.039	296.084	0.808	0.3314614E-03	7.798935	0.1399924E-01	-0.2540693
05272011	11	0.000	0.063	0.074	0.000	0.000	0.000	0.000	0.001	0.022	0.000	0.037	297.189	0.758	0.1012683E-03	6.451852	0.1709890E-01	-0.4232839
05272011	12	0.000	0.054	0.083	0.000	0.000	0.000	0.000	0.001	0.021	0.000	0.036	297.935	0.721	0.4881620E-04	5.477414	0.1648699E-01	-0.4785659
05272011	13	0.000	0.049	0.094	0.000	0.000	0.000	0.000	0.001	0.023	0.000	0.037	298.845	0.683	0.2753735E-04	4.833783	0.1512008E-01	-0.4952669
05272011	14	0.000	0.046	0.098	0.000	0.000	0.000	0.000	0.001	0.030	0.000	0.040	299.320	0.660	0.2270937E-04	4.500700	0.1097915E-01	-0.3872887
05272011	15	0.001	0.043	0.101	0.000	0.000	0.001	0.000	0.001	0.043	0.000	0.041	299.451	0.643	0.1162887E-03	3.550427	0.2868824E-02	0.9257674E-01
05272011	16	0.001	0.041	0.105	0.000	0.001	0.001	0.001	0.001	0.054	0.000	0.043	299.388	0.629	0.2350807E-03	3.446462	0.5607497E-02	-0.2113956
05272011	17	0.002	0.041	0.113	0.000	0.001	0.001	0.001	0.001	0.067	0.000	0.043	299.266	0.609	0.1003683E-02	3.420892	0.7722101E-02	-0.3535962
05272011	18	0.006	0.045	0.123	0.000	0.001	0.001	0.001	0.001	0.075	0.001	0.042	298.820	0.593	NaN	3.576683	0.1200578	-1.525910
05272011	19	0.026	0.054	0.110	0.000	0.001	0.002	0.001	0.002	0.075	0.002	0.041	297.854	0.648	NaN	5.297276	0.7814411E-01	-1.168844
05272011	20	0.031	0.077	0.085	0.000	0.001	0.001	0.001	0.002	0.074	0.002	0.040	296.025	0.665	NaN	5.695964	0.4801067E-01	-0.9257705
05272011	21	0.014	0.091	0.065	0.000	0.001	0.001	0.001	0.002	0.072	0.002	0.040	294.590	0.691	NaN	5.104673	0.4843616E-01	-0.9772017
05272011	22	0.016	0.092	0.057	0.000	0.001	0.001	0.001	0.002	0.069	0.002	0.039	293.561	0.729	NaN	5.832001	0.3838081E-01	-0.8182966
05272011	23	0.023	0.088	0.050	0.001	0.001	0.001	0.001	0.003	0.067	0.003	0.037	292.773	0.771	0.7958239E-01	5.488421	0.2384345E-03	1.362078
05272011	24	0.028	0.083	0.044	0.001	0.001	0.001	0.002	0.003	0.065	0.005	0.036	292.129	0.817	0.1385265	7.011408	0.1654696E-03	1.627087
05282011	01	0.025	0.079	0.040	0.001	0.001	0.001	0.002	0.003	0.066	0.006	0.035	291.547	0.866	0.2036874	9.778708	0.1538933E-03	1.803062
05282011	02	0.023	0.076	0.036	0.001	0.001	0.001	0.002	0.003	0.068	0.009	0.035	291.128	0.901	0.2704529	13.36681	0.1613704E-03	1.918204
05282011	03	0.021	0.074	0.033	0.002	0.001	0.001	0.002	0.003	0.072	0.013	0.034	290.879	0.918	0.3585440	17.86659	0.1574234E-03	2.054972
05282011	04	0.021	0.076	0.031	0.002	0.002	0.001	0.002	0.003	0.078	0.019	0.034	290.702	0.931	0.4549070	23.00766	0.1574748E-03	2.164661
05282011	05	0.023	0.082	0.028	0.004	0.001	0.001	0.002	0.003	0.088	0.029	0.033	290.593	0.939	0.5796051	31.73984	0.1636745E-03	2.287624
05282011	06	0.027	0.093	0.023	0.005	0.002	0.001	0.002	0.003	0.103	0.043	0.033	290.615	0.948	0.7304828	47.94825	0.1776760E-03	2.431144
05282011	07	0.026	0.106	0.023	0.007	0.002	0.001	0.002	0.002	0.128	0.067	0.032	291.921	0.955	0.7889753	78.56327	0.2909018E-03	2.431473
05282011	08	0.026	0.104	0.058	0.005	0.002	0.002	0.002	0.002	0.142	0.080	0.034	293.831	0.885	0.4688081	23.92124	0.1149694E-03	2.318201
05282011	09	0.026	0.122	0.148	0.001	0.001	0.001	0.002	0.003	0.097	0.031	0.038	295.699	0.808	0.1150848	8.490699	0.1479378E-03	1.758864
05282011	10	0.012	0.195	0.195	0.000	0.001	0.001	0.002	0.004	0.087	0.008	0.053	297.868	0.693	NaN	5.904702	0.1957142	-1.520424
05282011	11	0.001	0.272	0.204	0.000	0.001	0.001	0.002	0.004	0.075	0.001	0.071	300.036	0.585	0.1419187E-03	4.866426	0.3591602E-02	0.1319219
05282011	12	0.000	0.246	0.201	0.000	0.001	0.001	0.002	0.004	0.060	0.000	0.070	301.506	0.529	0.1007318E-04	4.170508	0.3067885E-02	0.1333500
05282011	13	0.000	0.197	0.197	0.000	0.001	0.001	0.002	0.004	0.054	0.000	0.067	302.802	0.485	0.2563000E-05	3.692493	0.4822660E-02	-0.1159669
05282011	14	0.000	0.166	0.191	0.000	0.001	0.001	0.002	0.004	0.051	0.000	0.066	303.580	0.457	0.1013279E-05	3.434801	0.6501453E-02	-0.2771088
05282011	15	0.000	0.157	0.191	0.000	0.001	0.001	0.002	0.004	0.053	0.000	0.070	303.498	0.452	0.7748604E-06	3.645742	0.8461588E-02	-0.3656659
05282011	16	0.000	0.147	0.187	0.000	0.001	0.001	0.002	0.005	0.054	0.000	0.071	303.073	0.455	0.1072884E-05	3.691835	0.7526717E-02	-0.3093633
05282011	17	0.000	0.129	0.177	0.000	0.001	0.001	0.002	0.005	0.054	0.000	0.069	302.375	0.462	0.1311302E-05	3.451739	0.5557677E-02	-0.2068554
05282011	18	0.000	0.116	0.168	0.000	0.001	0.001	0.002	0.005	0.056	0.000	0.067	301.518	0.471	0.3039837E-05	3.177392	0.2126201E-02	0.1744664
05282011	19	0.001	0.116	0.150	0.000	0.001	0.001	0.002	0.008	0.067	0.000	0.066	300.304	0.487	0.5418062E-04	2.914687	0.2226358E-02	0.1169969
05282011	20	0.007	0.130	0.137	0.000	0.001	0.002	0.004	0.013	0.093	0.001	0.067	298.312	0.522	0.1134133E-01	3.863955	0.6297055E-02	-0.2121054
05282011	21	0.029	0.142	0.167	0.000	0.002	0.003	0.005	0.017	0.091	0.003	0.067	296.836	0.555	NaN	4.902611	0.1349197	-1.439648
05282011	22	0.034	0.140	0.207	0.000	0.002	0.003	0.005	0.018	0.089	0.005	0.066	295.680	0.600	NaN	5.655164	0.1704825	-1.479235
05282011	23	0.033	0.124	0.226	0.000	0.002	0.003	0.005	0.019	0.085	0.008	0.063	294.734	0.655	NaN	6.663438	0.1894737	-1.453851
05282011	24	0.032	0.103	0.214	0.000	0.002	0.003	0.006	0.019	0.078	0.011	0.059	293.941	0.713	NaN	7.575273	0.1788648	-1.373127
05292011	01	0.030	0.081	0.177	0.000	0.002	0.003	0.006	0.020	0.067	0.014	0.053	293.207	0.777	NaN	9.236256	0.1416204	-1.185630
05292011	02	0.030	0.063	0.124	0.000	0.002	0.003	0.006	0.020	0.053	0.015	0.046	292.786	0.819	NaN	10.15222	0.8649287E-01	-0.9304195
05292011	03	0.032	0.052	0.074	0.001	0.002	0.003	0.006	0.020	0.039	0.011	0.041	292.594	0.842	0.1574469	6.266279	0.5708006E-04	2.040525
05292011	04	0.034	0.048	0.038	0.001	0.002	0.003	0.006	0.020	0.031	0.007	0.038	292.515	0.853	0.1663857	5.156495	0.3563473E-04	2.160481
05292011	05	0.037	0.050	0.021	0.001	0.002	0.003	0.006	0.019	0.030	0.004	0.038	292.604	0.853	0.1666471	4.896425	0.3507299E-04	2.144906
05292011	06	0.040	0.057	0.013	0.001	0.002	0.003	0.006	0.019	0.030	0.003	0.039	292.588	0.882	0.2197425	6.177701	0.3579046E-04	2.237060
05292011	07	0.045	0.065	0.014	0.002	0.002	0.003	0.007	0.020	0.027	0.004	0.039	294.239	0.864	0.1495716	4.986610	0.3079801E-04	2.209283
05292011	08	0.044	0.064	0.023	0.002	0.002	0.003	0.007	0.021	0.020	0.004	0.036	296.828	0.788	0.5004317E-01	2.682310	0.2203325E-04	2.085430
05292011	09	0.021	0.064	0.040	0.001	0.002	0.002	0.004	0.011	0.024	0.002	0.027	299.037	0.700	0.7884860E-02	1.971758	0.1106188E-03	1.251025
05292011	10	0.012	0.103	0.062	0.000	0.002	0.001	0.004	0.009	0.032	0.001	0.029	301.139	0.618	NaN	2.305459	0.4868190E-01	-1.324610
05292011	11	0.003	0.143	0.079	0.000	0.002	0.001	0.003	0.007	0.045	0.001	0.037	303.248	0.538	0.7268190E-03	2.033388	0.5436022E-02	-0.4270609
05292011	12	0.004	0.101	0.079	0.000	0.002	0.001	0.002	0.006	0.046	0.001	0.035	304.837	0.478	0.1323402E-02	1.746064	0.5576436E-02	-0.5042967
05292011	13	0.005	0.077	0.075	0.000	0.002	0.001	0.002	0.005	0.044	0.000	0.032	306.134	0.437	0.3875017E-02	1.609867	0.5928257E-02	-0.5661368
05292011	14	0.005	0.067	0.073	0.000	0.002	0.001	0.002	0.005	0.042	0.000	0.032	306.739	0.422	0.1378894E-02	1.384994	0.5723183E-02	-0.6161896
05292011	15	0.002	0.057	0.069	0.000	0.001	0.001	0.002	0.005	0.042	0.000	0.034	306.641	0.423	0.7247925E-04	1.227301	0.4923954E-02	-0.6033629
05292011	16	0.001	0.049	0.065	0.000	0.001	0.001	0.002	0.005	0.042	0.000	0.038	306.158	0.435	0.3331900E-04	1.359400	0.2586383E-02	-0.2793456
05292011	17	0.001	0.045	0.062	0.000	0.001	0.001	0.002	0.006	0.043	0.000	0.039	305.356	0.453	0.3927946E-04	1.403718	0.2984844E-02	-0.3276417
05292011	18	0.005	0.048	0.059	0.000	0.002	0.001	0.003	0.007	0.049	0.000	0.039	304.466	0.473	0.9882450E-03	1.818941	0.5786070E-02	-0.5025651
05292011	19	0.048	0.067	0.060	0.000	0.002	0.002	0.005	0.014	0.038	0.001	0.038	302.868	0.532	NaN	2.963343	0.7030895E-02	-0.3752286
05292011	20	0.086	0.088	0.059	0.000	0.002	0.003	0.006	0.021	0.021	0.001	0.038	298.312	0.522	NaN	2.688589	0.3035715E-04	1.947263
05292011	21	0.096	0.101	0.067	0.000	0.002	0.004	0.007	0.022	0.019	0.002	0.038	296.836	0.555	NaN	3.379234	0.2413688E-04	2.146137
05292011	22	0.096	0.104	0.077	0.000	0.002	0.004	0.007	0.023	0.019	0.003	0.038	295.680	0.600	NaN	4.261904	0.3654486E-04	2.066777
05292011	23	0.091	0.100	0.078	0.000	0.002	0.003	0.007	0.023	0.020	0.005	0.038	294.734	0.655	NaN	5.509824	0.8263942E-04	1.823951
05292011	24	0.084	0.093	0.072	0.000	0.002	0.004	0.007	0.023	0.020	0.007	0.038	293.941	0.713	NaN	6.670547	0.1034104E-03	1.809597
05302011	01	0.075	0.084	0.057	0.001	0.002	0.004	0.007	0.024	0.019	0.009	0.037	293.207	0.777	0.1895127	3.302542	0.8200805E-05	2.604992
05302011	02	0.067	0.074	0.039	0.001	0.002	0.004	0.008	0.025	0.018	0.009	0.037	292.786	0.819	0.2402213	3.710560	0.6997853E-05	2.724475
05302011	03	0.063	0.062	0.024	0.001	0.002	0.004	0.008	0.024	0.016	0.008	0.036	292.594	0.842	0.2618394	3.746541	0.6530306E-05	2.758697
05302011	04	0.064	0.051	0.015	0.002	0.002	0.003	0.007	0.024	0.014	0.006	0.036	292.515	0.853	0.2363041	3.489783	0.7777783E-05	2.651942
05302011	05	0.065	0.044	0.011	0.002	0.002	0.003	0.007	0.023	0.012	0.004	0.034	292.604	0.853	0.2353598	3.060833	0.5617677E-05	2.736283
05302011	06	0.067	0.045	0.008	0.002	0.002	0.003	0.007	0.022	0.009	0.003	0.032	292.588	0.882	0.3050979	3.481967	0.4394827E-05	2.898883
05302011	07	0.066	0.050	0.011	0.002	0.002	0.003	0.007	0.022	0.005	0.004	0.028	294.239	0.864	0.2046596	1.957651	0.1480695E-05	3.121270
05302011	08	0.050	0.052	0.023	0.002	0.002	0.004	0.008	0.022	0.003	0.002	0.023	296.828	0.788	0.1114404E-01	0.1705151	0.1123782E-06	3.181081
05302011	09	0.032	0.056	0.031	0.001	0.002	0.002	0.004	0.012	0.002	0.002	0.016	299.037	0.700	0.2034724E-01	0.5466225	0.8878335E-06	2.789356
05302011	10	0.018	0.093	0.051	0.001	0.002	0.001	0.003	0.009	0.014	0.002	0.020	301.139	0.618	0.3475726E-02	1.043231	0.6488642E-04	1.206227
05302011	11	0.002	0.127	0.070	0.000	0.001	0.001	0.003	0.006	0.031	0.001	0.028	303.248	0.538	0.3397465E-03	1.437855	0.4230905E-02	-0.4687180
05302011	12	0.002	0.081	0.071	0.000	0.001	0.001	0.002	0.005	0.027	0.000	0.024	304.837	0.478	0.2008677E-03	1.056807	0.4020360E-02	-0.5802692
05302011	13	0.001	0.058	0.067	0.000	0.001	0.001	0.002	0.004	0.027	0.000	0.025	306.134	0.437	0.3612041E-04	0.8840309	0.2725135E-02	-0.4889205
05302011	14	0.001	0.049	0.065	0.000	0.001	0.001	0.002	0.004	0.029	0.000	0.032	306.739	0.422	0.1382828E-04	1.116622	0.1039221E-02	0.3119829E-01
05302011	15	0.000	0.043	0.063	0.000	0.001	0.001	0.002	0.004	0.031	0.000	0.040	306.641	0.423	0.1013279E-05	1.553899	0.7374825E-03	0.3236710
05302011	16	0.000	0.039	0.060	0.000	0.001	0.001	0.002	0.004	0.033	0.000	0.044	306.158	0.435	0.5960464E-06	1.989805	0.2365487E-02	-0.7510992E-01
05302011	17	0.000	0.036	0.056	0.000	0.001	0.001	0.002	0.005	0.035	0.000	0.045	305.356	0.453	0.1907349E-05	1.912943	0.9639189E-03	0.2976616
05302011	18	0.001	0.038	0.054	0.000	0.001	0.001	0.002	0.007	0.046	0.000	0.045	304.466	0.473	0.4065037E-04	1.765214	0.2261684E-02	-0.1076346
05302011	19	0.035	0.056	0.058	0.000	0.001	0.002	0.004	0.013	0.049	0.001	0.043	302.868	0.532	NaN	2.985858	0.1940495E-01	-0.8128434
05302011	20	0.077	0.072	0.047	0.000	0.002	0.003	0.006	0.020	0.030	0.001	0.041	300.199	0.569	NaN	3.219357	0.5566806E-04	1.762163
05302011	21	0.087	0.076	0.034	0.000	0.002	0.003	0.006	0.021	0.023	0.001	0.039	298.497	0.609	NaN	2.993095	0.2633462E-04	2.055593
05302011	22	0.073	0.073	0.026	0.000	0.002	0.003	0.006	0.018	0.028	0.001	0.038	297.165	0.658	NaN	3.434810	0.3696969E-04	1.968057
05302011	23	0.063	0.067	0.020	0.000	0.002	0.002	0.005	0.017	0.032	0.001	0.038	296.184	0.700	NaN	3.718350	0.5309264E-04	1.845316
05302011	24	0.052	0.059	0.018	0.001	0.002	0.002	0.005	0.017	0.034	0.001	0.038	295.235	0.753	0.6781733E-01	3.100333	0.5008924E-04	1.791664
