# Supplementary material for: Understanding nitrate formation in a world with less sulfate
Source: Copernicus journal article supplement (doi:10.5194/acp-18-12765-2018), 2018-09-05
Supplement: Supplementary file 2 [file acp-18-12765-2018-supplement.zip › DATA/RAW DATA FOR DIURNALS/data_extract_JST_may_mod2011.csv]

Date	Hour	NH3	SO2	HNO3	CL	NA	MG	K	CA	NH4	NO3	SO4	T	RH	e_NO3	Water	H+	pH
05022011	01	0.026	0.022	0.006	0.003	0.002	0.002	0.005	0.012	0.001	0.001	0.014	291.552	0.754	0.3799808E-01	0.2621337	0.1573576E-06	3.221635
05022011	02	0.023	0.015	0.004	0.004	0.003	0.002	0.005	0.012	0.001	0.001	0.013	291.191	0.790	0.2409881E-01	0.1640637	0.1041136E-06	3.197505
05022011	03	0.021	0.012	0.003	0.005	0.003	0.001	0.004	0.011	0.000	0.001	0.011	290.869	0.814	0.000000	0.1013953E-08	0.6906837E-19	7.166739
05022011	04	0.022	0.013	0.004	0.004	0.003	0.001	0.004	0.011	0.000	0.001	0.011	290.572	0.829	0.000000	0.9989514E-09	0.1000096E-13	1.999502
05022011	05	0.031	0.017	0.005	0.003	0.003	0.002	0.004	0.012	0.000	0.001	0.011	290.308	0.845	0.000000	0.1342487E-08	0.1000038E-13	2.127894
05022011	06	0.045	0.023	0.005	0.003	0.003	0.002	0.005	0.014	0.001	0.004	0.011	290.020	0.864	0.3333334	0.6486429	0.3704887E-06	3.243231
05022011	07	0.056	0.027	0.001	0.007	0.003	0.003	0.005	0.016	0.001	0.013	0.011	290.342	0.880	NaN	5.073345	0.3516508E-09	7.159183
05022011	08	0.039	0.025	0.005	0.007	0.003	0.003	0.005	0.016	0.003	0.016	0.011	292.748	0.803	NaN	4.192579	0.4894451E-05	2.932777
05022011	09	0.023	0.024	0.021	0.002	0.002	0.001	0.003	0.009	0.002	0.002	0.010	294.820	0.745	0.7914305E-02	0.1308423	0.1208440E-06	3.034523
05022011	10	0.021	0.021	0.033	0.001	0.002	0.001	0.002	0.006	0.002	0.002	0.010	296.585	0.701	0.7444620E-02	0.5500891	0.7077289E-05	1.890566
05022011	11	0.019	0.011	0.038	0.001	0.001	0.001	0.002	0.005	0.006	0.001	0.010	297.378	0.665	0.3468692E-02	0.5829167	0.2043273E-04	1.455280
05022011	12	0.018	0.007	0.037	0.001	0.001	0.001	0.002	0.005	0.009	0.001	0.011	299.582	0.611	0.2383888E-02	0.5730745	0.2785355E-04	1.313330
05022011	13	0.018	0.006	0.035	0.000	0.001	0.001	0.002	0.004	0.011	0.001	0.011	300.031	0.583	NaN	1.249261	0.1409956E-01	-1.052552
05022011	14	0.020	0.006	0.032	0.000	0.001	0.001	0.002	0.004	0.010	0.001	0.011	301.057	0.559	NaN	1.186502	0.9829054E-02	-0.9182431
05022011	15	0.023	0.007	0.026	0.000	0.001	0.001	0.002	0.005	0.008	0.000	0.010	299.264	0.569	NaN	1.204209	0.3931667E-03	0.4861253
05022011	16	0.028	0.009	0.019	0.001	0.001	0.001	0.002	0.006	0.004	0.000	0.011	299.979	0.575	0.2453506E-02	0.4313205	0.1263093E-04	1.533365
05022011	17	0.025	0.009	0.018	0.001	0.001	0.001	0.002	0.006	0.006	0.000	0.011	298.824	0.578	0.2888262E-02	0.4439648	0.1565199E-04	1.452779
05022011	18	0.029	0.011	0.015	0.001	0.002	0.001	0.003	0.008	0.003	0.000	0.012	297.828	0.604	0.8613765E-02	0.3866267	0.2080766E-05	2.269068
05022011	19	0.033	0.016	0.013	0.001	0.002	0.002	0.003	0.011	0.000	0.001	0.013	296.900	0.629	0.1230794E-01	0.1553171	0.1969742E-06	2.896810
05022011	20	0.034	0.022	0.010	0.002	0.002	0.002	0.005	0.016	0.000	0.001	0.013	295.460	0.656	0.000000	0.1735975E-08	0.1274656E-18	7.134151
05022011	21	0.034	0.025	0.007	0.002	0.002	0.002	0.005	0.017	0.000	0.003	0.013	294.810	0.652	0.2000000	0.1321910	0.1406783E-07	3.972975
05022011	22	0.030	0.027	0.008	0.003	0.002	0.002	0.005	0.016	0.000	0.003	0.012	294.259	0.672	0.1818182	0.1431569	0.2309422E-07	3.792309
05022011	23	0.024	0.027	0.008	0.003	0.002	0.002	0.005	0.014	0.000	0.001	0.012	293.444	0.712	0.000000	0.1246333E-08	0.8807793E-19	7.150767
05022011	24	0.020	0.022	0.006	0.003	0.002	0.001	0.005	0.012	0.000	0.001	0.012	292.926	0.737	0.000000	0.9648782E-09	0.1000054E-13	1.984449
05032011	01	0.019	0.016	0.006	0.002	0.003	0.001	0.005	0.012	0.000	0.001	0.011	292.494	0.750	0.000000	0.9108017E-09	0.6360251E-19	7.155950
05032011	02	0.021	0.013	0.005	0.002	0.003	0.001	0.005	0.012	0.000	0.001	0.011	292.048	0.765	0.000000	0.9751426E-09	0.1000057E-13	1.989044
05032011	03	0.025	0.012	0.005	0.002	0.003	0.001	0.005	0.013	0.000	0.001	0.012	291.792	0.762	0.000000	0.1257599E-08	0.8605147E-19	7.164784
05032011	04	0.032	0.012	0.004	0.002	0.003	0.002	0.006	0.014	0.001	0.003	0.012	291.372	0.801	0.4285715	0.3980026	0.1367617E-06	3.463922
05032011	05	0.040	0.014	0.003	0.003	0.003	0.002	0.006	0.017	0.001	0.006	0.013	291.111	0.824	0.3333334	0.4640758	0.2063270E-06	3.352033
05032011	06	0.056	0.018	0.000	0.005	0.004	0.003	0.008	0.020	0.001	0.010	0.013	290.901	0.839	NaN	2.711170	0.1877390E-09	7.159602
05032011	07	0.068	0.021	0.000	0.006	0.004	0.004	0.008	0.023	0.001	0.012	0.014	291.329	0.855	NaN	3.593024	0.2555825E-09	7.147929
05032011	08	0.053	0.021	0.000	0.007	0.004	0.004	0.008	0.022	0.002	0.022	0.013	293.898	0.786	NaN	4.360991	0.3296875E-09	7.121483
05032011	09	0.031	0.025	0.016	0.004	0.003	0.002	0.005	0.014	0.003	0.010	0.012	295.908	0.722	0.1153846	0.2635013	0.7085819E-07	3.570393
05032011	10	0.021	0.035	0.030	0.002	0.002	0.001	0.003	0.007	0.002	0.002	0.010	297.828	0.660	0.1273268E-01	0.3447893	0.9181219E-06	2.574653
05032011	11	0.014	0.024	0.033	0.001	0.002	0.001	0.002	0.005	0.007	0.001	0.010	299.045	0.619	0.2207875E-02	0.5174973	0.2183051E-04	1.374844
05032011	12	0.013	0.019	0.026	0.001	0.001	0.001	0.001	0.004	0.009	0.001	0.010	299.757	0.591	0.2835512E-02	0.5615340	0.2753161E-04	1.309544
05032011	13	0.012	0.018	0.022	0.001	0.001	0.001	0.001	0.003	0.010	0.000	0.009	301.250	0.557	0.2685547E-02	0.5172850	0.2011502E-04	1.410210
05032011	14	0.009	0.013	0.019	0.001	0.001	0.000	0.001	0.002	0.013	0.000	0.010	297.915	0.706	0.6593943E-02	0.9690889	0.5960248E-04	1.211099
05032011	15	0.013	0.012	0.020	0.001	0.001	0.001	0.001	0.001	0.016	0.000	0.010	296.259	0.759	0.9067118E-02	1.362952	0.7152635E-04	1.280014
05032011	16	0.018	0.016	0.020	0.001	0.001	0.001	0.001	0.001	0.019	0.000	0.012	294.818	0.770	0.1490825E-01	1.722439	0.8855700E-04	1.288921
05032011	17	0.021	0.024	0.020	0.001	0.001	0.001	0.001	0.002	0.026	0.001	0.017	291.956	0.813	0.5076063E-01	2.838570	0.9120495E-04	1.493081
05032011	18	0.022	0.027	0.020	0.001	0.002	0.001	0.001	0.003	0.035	0.002	0.022	289.612	0.849	0.1483438	4.749753	0.8426677E-04	1.751015
05032011	19	0.017	0.023	0.016	0.001	0.002	0.001	0.001	0.003	0.039	0.003	0.023	287.285	0.895	0.2950323	7.907109	0.8799335E-04	1.953568
05032011	20	0.011	0.016	0.011	0.001	0.002	0.001	0.001	0.002	0.031	0.003	0.018	285.759	0.919	0.3117310	7.875942	0.8180335E-04	1.983531
05032011	21	0.009	0.008	0.006	0.001	0.001	0.000	0.001	0.001	0.016	0.002	0.010	285.060	0.913	0.1412202	3.557981	0.6206091E-04	1.758386
05032011	22	0.008	0.005	0.004	0.000	0.001	0.000	0.000	0.001	0.008	0.000	0.005	284.535	0.915	NaN	2.881762	0.4703267E-04	1.787259
05032011	23	0.008	0.005	0.003	0.000	0.001	0.000	0.000	0.000	0.004	0.000	0.003	284.066	0.914	0.5679178E-01	1.130402	0.2163059E-04	1.718164
05032011	24	0.007	0.006	0.003	0.000	0.001	0.000	0.000	0.000	0.003	0.000	0.003	283.604	0.909	0.4530662E-01	1.116562	0.2891026E-04	1.586831
05042011	01	0.006	0.006	0.005	0.000	0.001	0.000	0.000	0.000	0.006	0.000	0.004	283.137	0.906	0.6338453E-01	1.524369	0.3946741E-04	1.586851
05042011	02	0.005	0.005	0.007	0.000	0.001	0.000	0.000	0.000	0.013	0.001	0.007	282.632	0.912	0.1065224	2.742620	0.7594792E-04	1.557650
05042011	03	0.004	0.006	0.009	0.001	0.001	0.000	0.001	0.001	0.021	0.002	0.012	282.334	0.910	0.1473291	4.383174	0.1314593E-03	1.522998
05042011	04	0.002	0.009	0.010	0.001	0.001	0.000	0.001	0.002	0.032	0.002	0.019	282.253	0.894	0.8607179E-01	5.127963	0.4534643E-03	1.053402
05042011	05	0.004	0.008	0.010	0.001	0.002	0.000	0.002	0.003	0.044	0.004	0.026	282.123	0.887	0.2178858	7.432961	0.2989253E-03	1.395599
05042011	06	0.003	0.009	0.013	0.001	0.002	0.001	0.002	0.005	0.057	0.005	0.033	282.013	0.881	0.3145593	8.751339	0.2572646E-03	1.531695
05042011	07	0.003	0.014	0.015	0.001	0.002	0.001	0.002	0.006	0.066	0.006	0.039	281.946	0.871	0.2792211	9.375627	0.3948177E-03	1.375604
05042011	08	0.002	0.021	0.019	0.001	0.001	0.001	0.003	0.007	0.068	0.003	0.041	282.425	0.841	0.2977908E-02	10.56105	0.2198581E-02	0.6815646
05042011	09	0.001	0.028	0.026	0.000	0.001	0.001	0.002	0.006	0.065	0.000	0.044	283.983	0.762	0.2545273E-01	5.413766	0.4763263E-02	0.5559497E-01
05042011	10	0.000	0.028	0.034	0.000	0.001	0.001	0.002	0.005	0.066	0.001	0.046	287.203	0.630	0.3496051E-02	3.538420	0.9594195E-02	-0.4331991
05042011	11	0.001	0.020	0.040	0.000	0.001	0.001	0.002	0.005	0.061	0.001	0.041	289.438	0.539	0.4040480E-02	2.470295	0.5391131E-02	-0.3389310
05042011	12	0.003	0.018	0.039	0.000	0.001	0.001	0.002	0.004	0.056	0.001	0.035	290.903	0.491	0.2010757E-01	2.218663	0.3257816E-02	-0.1668353
05042011	13	0.009	0.018	0.037	0.000	0.001	0.001	0.002	0.004	0.049	0.001	0.031	292.216	0.446	NaN	1.677335	0.2828477E-01	-1.226933
05042011	14	0.014	0.018	0.034	0.000	0.001	0.001	0.002	0.004	0.044	0.001	0.028	292.977	0.411	NaN	1.400575	0.1919693E-01	-1.136925
05042011	15	0.018	0.017	0.030	0.000	0.001	0.001	0.002	0.004	0.037	0.001	0.024	292.650	0.409	NaN	1.268348	0.1013179E-01	-0.9024479
05042011	16	0.023	0.016	0.025	0.000	0.001	0.001	0.002	0.004	0.028	0.001	0.019	291.970	0.417	NaN	1.134946	0.6925606E-03	0.2145174
05042011	17	0.026	0.016	0.021	0.000	0.001	0.001	0.002	0.004	0.021	0.000	0.016	290.944	0.429	NaN	0.9630532	0.6348297E-04	1.180993
05042011	18	0.029	0.016	0.016	0.000	0.001	0.001	0.002	0.004	0.016	0.000	0.013	289.774	0.437	NaN	0.7629083	0.1774330E-04	1.633438
05042011	19	0.034	0.017	0.012	0.000	0.001	0.001	0.002	0.004	0.014	0.000	0.013	288.766	0.445	NaN	0.7269915	0.1421232E-04	1.708864
05042011	20	0.050	0.019	0.010	0.001	0.001	0.001	0.002	0.007	0.009	0.000	0.013	287.490	0.468	0.4830700E-01	0.3915446	0.6800806E-05	1.760221
05042011	21	0.064	0.020	0.010	0.001	0.001	0.001	0.003	0.010	0.004	0.001	0.014	286.439	0.495	0.8281022E-01	0.2871248	0.9019958E-06	2.502866
05042011	22	0.061	0.019	0.010	0.001	0.001	0.001	0.003	0.010	0.006	0.001	0.016	285.514	0.522	0.1089421	0.4494529	0.3396748E-05	2.121621
05042011	23	0.051	0.018	0.008	0.001	0.002	0.001	0.003	0.010	0.013	0.002	0.018	284.628	0.551	0.1697974	0.6752899	0.5911552E-05	2.057789
05042011	24	0.040	0.018	0.007	0.001	0.002	0.001	0.003	0.009	0.021	0.003	0.021	283.806	0.578	0.2266898	1.082701	0.1408020E-04	1.885900
05052011	01	0.032	0.019	0.007	0.001	0.002	0.001	0.003	0.008	0.026	0.003	0.023	282.866	0.610	0.2776046	1.471420	0.2268728E-04	1.811954
05052011	02	0.026	0.019	0.006	0.001	0.002	0.001	0.003	0.008	0.029	0.004	0.024	282.125	0.639	0.3129963	1.727387	0.2694386E-04	1.806930
05052011	03	0.022	0.017	0.006	0.001	0.002	0.001	0.003	0.007	0.031	0.004	0.024	281.580	0.666	0.3405622	2.023365	0.3229110E-04	1.796992
05052011	04	0.023	0.015	0.005	0.001	0.002	0.001	0.003	0.008	0.030	0.004	0.023	281.166	0.691	0.3977749	1.951189	0.2152960E-04	1.957263
05052011	05	0.029	0.012	0.005	0.001	0.002	0.001	0.003	0.008	0.028	0.005	0.022	280.799	0.715	0.4884450	2.129768	0.1494750E-04	2.153764
05052011	06	0.039	0.011	0.005	0.001	0.002	0.001	0.003	0.009	0.026	0.008	0.021	280.474	0.740	0.5950769	2.236915	0.8155741E-05	2.438186
05052011	07	0.042	0.010	0.006	0.001	0.002	0.001	0.004	0.010	0.026	0.012	0.020	280.685	0.753	0.6297256	2.308009	0.5060975E-05	2.659003
05052011	08	0.031	0.010	0.010	0.001	0.001	0.001	0.003	0.009	0.029	0.013	0.020	282.575	0.697	0.3791106	1.825793	0.1007472E-04	2.258218
05052011	09	0.023	0.012	0.019	0.001	0.001	0.001	0.003	0.008	0.032	0.011	0.021	284.890	0.619	0.1708480	1.406261	0.2219424E-04	1.801826
05052011	10	0.022	0.012	0.029	0.000	0.001	0.001	0.003	0.007	0.030	0.008	0.021	287.067	0.547	NaN	1.891195	0.5950750E-02	-0.4978353
05052011	11	0.026	0.012	0.045	0.000	0.001	0.001	0.003	0.007	0.026	0.004	0.021	288.974	0.495	NaN	1.565424	0.1810986E-01	-1.063283
05052011	12	0.029	0.012	0.061	0.000	0.001	0.001	0.003	0.007	0.024	0.003	0.021	290.821	0.445	NaN	1.299966	0.3261826E-01	-1.399529
05052011	13	0.029	0.011	0.068	0.000	0.001	0.001	0.003	0.007	0.022	0.002	0.020	292.356	0.408	NaN	1.048540	0.3883510E-01	-1.568639
05052011	14	0.029	0.011	0.076	0.000	0.001	0.001	0.003	0.006	0.022	0.001	0.019	293.344	0.388	NaN	0.9591916	0.4595342E-01	-1.680413
05052011	15	0.030	0.013	0.085	0.000	0.001	0.001	0.003	0.007	0.023	0.001	0.020	293.293	0.396	NaN	1.027287	0.5296515E-01	-1.712299
05052011	16	0.030	0.015	0.088	0.000	0.001	0.001	0.003	0.007	0.024	0.001	0.021	292.972	0.410	NaN	1.110696	0.5696122E-01	-1.709984
05052011	17	0.027	0.018	0.082	0.000	0.001	0.001	0.002	0.006	0.026	0.001	0.021	292.272	0.430	NaN	1.224485	0.5491374E-01	-1.651728
05052011	18	0.024	0.023	0.069	0.000	0.001	0.001	0.002	0.006	0.028	0.001	0.022	291.391	0.452	NaN	1.332470	0.4479526E-01	-1.526575
05052011	19	0.024	0.027	0.053	0.000	0.001	0.001	0.003	0.007	0.033	0.001	0.026	290.347	0.476	NaN	1.653374	0.2828950E-01	-1.233254
05052011	20	0.044	0.034	0.033	0.000	0.001	0.001	0.004	0.012	0.034	0.002	0.031	288.930	0.512	NaN	2.049124	0.5720400E-04	1.554142
05052011	21	0.052	0.044	0.035	0.000	0.001	0.002	0.005	0.016	0.041	0.004	0.038	287.607	0.557	NaN	2.857322	0.3873402E-04	1.867867
05052011	22	0.042	0.054	0.047	0.000	0.002	0.002	0.005	0.017	0.056	0.009	0.045	286.548	0.606	NaN	4.483441	0.2415521E-02	0.2686008
05052011	23	0.027	0.064	0.066	0.000	0.002	0.002	0.005	0.017	0.071	0.014	0.050	285.773	0.647	NaN	5.270888	0.3383531E-01	-0.8074865
05052011	24	0.017	0.073	0.088	0.000	0.002	0.002	0.005	0.017	0.081	0.019	0.053	285.044	0.692	NaN	6.140274	0.6750081E-01	-1.041121
05062011	01	0.008	0.077	0.102	0.000	0.002	0.002	0.005	0.018	0.090	0.028	0.053	284.322	0.749	NaN	7.822504	0.8811967E-01	-1.051727
05062011	02	0.005	0.076	0.112	0.000	0.002	0.002	0.006	0.019	0.092	0.033	0.053	283.834	0.791	NaN	9.458387	0.1004549	-1.026154
05062011	03	0.004	0.074	0.118	0.000	0.002	0.002	0.006	0.020	0.095	0.041	0.052	283.547	0.814	NaN	10.81658	0.1079351	-0.9990728
05062011	04	0.004	0.073	0.119	0.001	0.002	0.002	0.006	0.022	0.103	0.056	0.051	283.343	0.829	0.3258420	12.80712	0.2977661E-03	1.633576
05062011	05	0.005	0.074	0.101	0.001	0.002	0.002	0.007	0.026	0.123	0.086	0.050	283.174	0.842	0.4683710	16.77470	0.2372571E-03	1.849436
05062011	06	0.010	0.080	0.059	0.002	0.002	0.004	0.008	0.031	0.154	0.131	0.050	283.072	0.853	0.7025551	23.89916	0.1662883E-03	2.157521
05062011	07	0.024	0.086	0.023	0.004	0.003	0.005	0.010	0.038	0.176	0.167	0.051	283.828	0.851	0.8717390	27.71227	0.7087682E-04	2.592168
05062011	08	0.014	0.082	0.071	0.002	0.002	0.005	0.009	0.032	0.154	0.135	0.051	286.184	0.752	0.6010233	11.99709	0.3969285E-04	2.480364
05062011	09	0.021	0.097	0.116	0.001	0.002	0.003	0.006	0.020	0.092	0.049	0.047	288.655	0.642	0.2394319	4.404295	0.3903163E-04	2.052460
05062011	10	0.018	0.142	0.117	0.000	0.002	0.002	0.004	0.013	0.063	0.011	0.043	290.646	0.554	NaN	3.166517	0.9654780E-01	-1.484161
05062011	11	0.010	0.115	0.099	0.000	0.002	0.001	0.003	0.009	0.054	0.003	0.039	292.194	0.499	NaN	2.197956	0.9083036E-01	-1.616212
05062011	12	0.005	0.078	0.086	0.000	0.002	0.001	0.003	0.008	0.053	0.001	0.035	293.315	0.451	NaN	1.708568	0.7584850E-01	-1.647315
05062011	13	0.010	0.056	0.068	0.000	0.001	0.001	0.003	0.007	0.040	0.001	0.030	295.117	0.405	NaN	1.267641	0.5889294E-01	-1.667067
05062011	14	0.013	0.038	0.044	0.000	0.001	0.001	0.002	0.006	0.027	0.000	0.022	295.714	0.382	NaN	0.8778794	0.3075985E-01	-1.544549
05062011	15	0.018	0.027	0.029	0.000	0.001	0.001	0.002	0.006	0.018	0.000	0.017	294.863	0.390	NaN	0.7491641	0.9166816E-02	-1.087642
05062011	16	0.029	0.025	0.029	0.000	0.001	0.001	0.003	0.007	0.014	0.000	0.016	294.053	0.409	NaN	0.8238915	0.9689559E-04	0.9295660
05062011	17	0.034	0.027	0.030	0.000	0.001	0.001	0.003	0.008	0.011	0.000	0.017	294.857	0.420	NaN	0.8769152	0.7311805E-04	1.078933
05062011	18	0.027	0.025	0.024	0.000	0.001	0.001	0.002	0.007	0.014	0.000	0.016	293.956	0.439	NaN	0.8867120	0.7379583E-04	1.079751
05062011	19	0.041	0.021	0.017	0.000	0.001	0.001	0.003	0.011	0.005	0.000	0.016	292.783	0.482	NaN	0.6454424	0.4278505E-05	2.178566
05062011	20	0.069	0.025	0.018	0.000	0.001	0.002	0.006	0.020	0.000	0.001	0.016	290.341	0.522	NaN	0.4599282	0.3664882E-06	3.098630
05062011	21	0.080	0.028	0.010	0.002	0.002	0.002	0.006	0.022	0.001	0.013	0.015	288.957	0.549	NaN	1.570745	0.8120413E-10	7.286528
05062011	22	0.076	0.028	0.000	0.005	0.002	0.002	0.006	0.021	0.005	0.027	0.014	287.684	0.602	NaN	2.212241	0.6017617E-06	3.565408
05062011	23	0.073	0.027	0.003	0.004	0.001	0.002	0.006	0.020	0.007	0.026	0.014	286.710	0.645	NaN	2.424607	0.1071210E-05	3.354767
05062011	24	0.077	0.027	0.023	0.000	0.001	0.002	0.006	0.018	0.003	0.005	0.013	285.780	0.700	NaN	1.602021	0.1984806E-05	2.906950
05072011	01	0.074	0.027	0.020	0.000	0.001	0.002	0.006	0.017	0.006	0.007	0.013	284.916	0.763	NaN	2.118657	0.3136388E-05	2.829631
05072011	02	0.068	0.029	0.017	0.001	0.001	0.002	0.005	0.016	0.009	0.008	0.013	284.327	0.805	0.2941960	0.8017284	0.1100948E-05	2.862261
05072011	03	0.065	0.031	0.016	0.001	0.001	0.002	0.005	0.015	0.009	0.009	0.013	283.973	0.825	0.3865191	1.225409	0.1880515E-05	2.814004
05072011	04	0.066	0.032	0.015	0.001	0.001	0.002	0.005	0.015	0.009	0.009	0.012	283.688	0.839	0.4461874	1.475563	0.2257713E-05	2.815289
05072011	05	0.067	0.033	0.013	0.001	0.002	0.002	0.005	0.015	0.012	0.011	0.012	283.490	0.851	0.5892397	2.188429	0.2812255E-05	2.891078
05072011	06	0.074	0.034	0.011	0.001	0.002	0.002	0.005	0.016	0.017	0.017	0.012	283.457	0.855	0.6979074	3.278227	0.4079250E-05	2.905059
05072011	07	0.094	0.036	0.001	0.003	0.002	0.002	0.006	0.019	0.015	0.034	0.013	284.383	0.856	NaN	6.578279	0.2982633E-05	3.343513
05072011	08	0.083	0.034	0.000	0.004	0.002	0.003	0.007	0.021	0.024	0.051	0.013	287.889	0.754	NaN	5.259991	0.4104125E-05	3.107764
05072011	09	0.056	0.031	0.035	0.001	0.001	0.002	0.005	0.013	0.007	0.009	0.012	290.863	0.630	0.000000	0.6996046E-08	0.1000073E-13	2.844821
05072011	10	0.044	0.045	0.040	0.000	0.001	0.001	0.004	0.009	0.003	0.002	0.012	293.343	0.527	NaN	1.236560	0.1812665E-04	1.833898
05072011	11	0.032	0.045	0.043	0.000	0.001	0.001	0.003	0.007	0.005	0.001	0.012	294.702	0.492	NaN	1.005286	0.9854623E-02	-0.9913502
05072011	12	0.029	0.045	0.054	0.000	0.001	0.001	0.003	0.007	0.007	0.001	0.012	296.434	0.448	NaN	0.8163349	0.2245766E-01	-1.439496
05072011	13	0.028	0.047	0.061	0.000	0.001	0.001	0.002	0.007	0.009	0.001	0.013	298.119	0.406	NaN	0.7110110	0.3183908E-01	-1.651084
05072011	14	0.028	0.049	0.061	0.000	0.001	0.001	0.002	0.007	0.011	0.001	0.014	299.092	0.382	NaN	0.6568813	0.3189091E-01	-1.686180
05072011	15	0.030	0.049	0.055	0.000	0.001	0.001	0.002	0.007	0.012	0.000	0.015	299.019	0.380	NaN	0.7120093	0.2351387E-01	-1.518838
05072011	16	0.033	0.049	0.046	0.000	0.001	0.001	0.002	0.007	0.011	0.000	0.015	298.584	0.385	NaN	0.7700558	0.1171465E-01	-1.182207
05072011	17	0.036	0.048	0.034	0.000	0.001	0.001	0.002	0.006	0.009	0.000	0.013	297.680	0.397	NaN	0.7712989	0.7131392E-04	1.034048
05072011	18	0.041	0.052	0.023	0.000	0.001	0.001	0.002	0.007	0.006	0.000	0.012	296.584	0.411	NaN	0.5708771	0.5296371E-05	2.032564
05072011	19	0.060	0.060	0.015	0.001	0.001	0.001	0.003	0.009	0.002	0.001	0.012	295.130	0.446	0.2351171E-01	0.1799186	0.1334068E-06	3.129898
05072011	20	0.080	0.073	0.011	0.001	0.001	0.002	0.004	0.013	0.000	0.000	0.013	292.802	0.496	0.5960464E-07	0.1660852E-07	0.9548846E-18	7.240380
05072011	21	0.084	0.086	0.012	0.001	0.002	0.002	0.005	0.014	0.000	0.001	0.015	291.298	0.519	0.9297550E-02	0.2663773E-01	0.6667147E-08	3.601557
05072011	22	0.083	0.099	0.015	0.001	0.002	0.002	0.005	0.015	0.001	0.001	0.016	289.814	0.585	0.1623774E-01	0.5033374E-01	0.1767454E-07	3.454511
05072011	23	0.082	0.108	0.019	0.001	0.002	0.002	0.005	0.014	0.003	0.003	0.018	288.848	0.626	0.1261888	0.4643146	0.4667891E-06	2.997692
05072011	24	0.078	0.113	0.024	0.001	0.002	0.002	0.004	0.014	0.006	0.004	0.019	287.820	0.684	0.2367796	0.9977823	0.9172851E-06	3.036531
05082011	01	0.070	0.113	0.027	0.001	0.001	0.002	0.004	0.013	0.010	0.007	0.019	286.901	0.757	0.3363095	1.856932	0.2522565E-05	2.866954
05082011	02	0.061	0.110	0.028	0.001	0.002	0.002	0.004	0.014	0.014	0.011	0.020	286.327	0.806	0.4615054	3.110010	0.4395549E-05	2.849749
05082011	03	0.053	0.105	0.028	0.001	0.002	0.002	0.004	0.014	0.017	0.015	0.019	286.110	0.820	0.4778023	3.409532	0.4834878E-05	2.848309
05082011	04	0.055	0.099	0.028	0.001	0.002	0.002	0.005	0.014	0.017	0.016	0.019	286.014	0.825	0.5139574	3.872336	0.5523962E-05	2.845722
05082011	05	0.063	0.092	0.027	0.001	0.002	0.002	0.005	0.015	0.015	0.014	0.018	285.943	0.833	0.4902466	3.088858	0.4003478E-05	2.887361
05082011	06	0.076	0.082	0.025	0.001	0.002	0.002	0.006	0.017	0.010	0.009	0.017	285.856	0.850	0.4498012	2.276392	0.4359733E-05	2.717787
05082011	07	0.077	0.075	0.019	0.001	0.002	0.003	0.006	0.019	0.008	0.008	0.017	286.895	0.870	0.3252861	1.579624	0.3338218E-05	2.675039
05082011	08	0.063	0.071	0.020	0.001	0.003	0.003	0.007	0.021	0.006	0.005	0.017	290.657	0.759	0.000000	0.3897528E-08	0.1000091E-13	2.590750
05082011	09	0.046	0.105	0.029	0.001	0.003	0.002	0.005	0.015	0.011	0.005	0.023	293.558	0.690	0.5881649E-01	1.118198	0.4638501E-05	2.382141
05082011	10	0.038	0.107	0.047	0.001	0.003	0.002	0.004	0.012	0.026	0.005	0.028	295.898	0.638	0.2432275E-01	1.704762	0.4887292E-04	1.542596
05082011	11	0.033	0.083	0.053	0.001	0.002	0.002	0.004	0.010	0.033	0.004	0.029	297.703	0.607	0.1323819E-01	1.784021	0.9029020E-04	1.295759
05082011	12	0.026	0.053	0.044	0.000	0.002	0.001	0.003	0.008	0.033	0.002	0.027	299.296	0.580	NaN	2.471148	0.1414527E-01	-0.7577124
05082011	13	0.023	0.043	0.036	0.000	0.002	0.001	0.003	0.008	0.034	0.002	0.027	300.784	0.555	NaN	2.239205	0.8461116E-02	-0.5773337
05082011	14	0.022	0.042	0.032	0.000	0.002	0.001	0.003	0.007	0.032	0.001	0.027	301.580	0.542	NaN	2.024657	0.8552411E-02	-0.6257370
05082011	15	0.019	0.037	0.026	0.000	0.002	0.001	0.003	0.007	0.031	0.001	0.026	301.485	0.539	NaN	1.893549	0.5404090E-02	-0.4554460
05082011	16	0.020	0.036	0.026	0.000	0.002	0.001	0.003	0.008	0.034	0.001	0.028	300.475	0.556	NaN	2.154889	0.4020432E-02	-0.2708479
05082011	17	0.018	0.033	0.026	0.001	0.002	0.001	0.003	0.008	0.040	0.001	0.032	299.978	0.576	0.1077259E-01	1.977934	0.1408746E-03	1.147379
05082011	18	0.019	0.024	0.024	0.001	0.002	0.002	0.003	0.009	0.044	0.001	0.035	298.902	0.604	0.1434404E-01	2.332859	0.1731581E-03	1.129446
05082011	19	0.040	0.026	0.023	0.001	0.002	0.002	0.005	0.014	0.043	0.001	0.040	297.297	0.650	0.2410299E-01	2.677899	0.1183766E-03	1.354528
05082011	20	0.064	0.027	0.022	0.001	0.003	0.003	0.006	0.018	0.040	0.002	0.044	295.291	0.693	0.7811499E-01	3.186166	0.5123542E-04	1.793698
05082011	21	0.060	0.025	0.022	0.001	0.003	0.003	0.005	0.016	0.047	0.003	0.044	293.808	0.738	0.1335754	4.150137	0.5358806E-04	1.888994
05082011	22	0.050	0.022	0.020	0.001	0.002	0.002	0.004	0.013	0.052	0.003	0.043	292.909	0.765	0.1476662	4.881940	0.7833182E-04	1.794654
05082011	23	0.046	0.020	0.017	0.001	0.002	0.002	0.004	0.012	0.048	0.003	0.039	292.233	0.799	0.1749000	5.050914	0.6418760E-04	1.895919
05082011	24	0.043	0.020	0.014	0.001	0.002	0.002	0.004	0.011	0.039	0.003	0.033	291.497	0.848	0.2271203	5.519557	0.4421462E-04	2.096338
05092011	01	0.042	0.017	0.011	0.001	0.002	0.001	0.003	0.011	0.029	0.003	0.027	290.940	0.884	0.2410406	5.067625	0.3142972E-04	2.207464
05092011	02	0.044	0.015	0.010	0.001	0.002	0.001	0.003	0.010	0.020	0.003	0.022	290.572	0.900	0.2751181	4.811677	0.1966254E-04	2.388657
05092011	03	0.050	0.015	0.011	0.001	0.001	0.001	0.003	0.011	0.014	0.003	0.019	290.349	0.903	0.2666042	3.541272	0.9865914E-05	2.555022
05092011	04	0.062	0.016	0.012	0.001	0.001	0.001	0.003	0.012	0.009	0.004	0.017	290.232	0.900	0.3033657	2.848373	0.4342416E-05	2.816865
05092011	05	0.086	0.019	0.014	0.001	0.001	0.001	0.004	0.014	0.006	0.005	0.016	290.160	0.896	0.3292259	2.207920	0.1935299E-05	3.057235
05092011	06	0.122	0.023	0.016	0.001	0.001	0.002	0.005	0.018	0.004	0.004	0.016	290.146	0.894	0.7957572E-01	0.3557475	0.6951472E-06	2.709065
05092011	07	0.152	0.028	0.012	0.001	0.002	0.004	0.006	0.023	0.005	0.014	0.017	291.076	0.894	0.3976086	2.366413	0.3517021E-05	2.827916
05092011	08	0.127	0.026	0.000	0.004	0.002	0.004	0.008	0.029	0.013	0.049	0.017	294.907	0.801	NaN	6.827274	0.4711324E-05	3.161104
05092011	09	0.066	0.020	0.024	0.003	0.002	0.003	0.007	0.023	0.014	0.031	0.017	297.234	0.710	0.3931856E-01	0.1748941	0.7777678E-07	3.351925
05092011	10	0.035	0.021	0.048	0.000	0.001	0.001	0.003	0.010	0.009	0.002	0.017	298.973	0.641	NaN	2.229563	0.1144033E-01	-0.7102188
05092011	11	0.026	0.021	0.064	0.000	0.001	0.001	0.003	0.008	0.013	0.001	0.016	300.682	0.581	NaN	1.599419	0.3454174E-01	-1.334382
05092011	12	0.019	0.023	0.066	0.000	0.001	0.001	0.002	0.006	0.018	0.001	0.017	302.244	0.529	NaN	1.313367	0.4614032E-01	-1.545695
05092011	13	0.016	0.023	0.060	0.000	0.001	0.001	0.002	0.006	0.023	0.001	0.019	303.481	0.488	NaN	1.216247	0.4181231E-01	-1.536282
05092011	14	0.013	0.020	0.051	0.000	0.001	0.001	0.002	0.005	0.028	0.001	0.021	303.969	0.470	NaN	1.232799	0.3631861E-01	-1.469237
05092011	15	0.009	0.014	0.046	0.000	0.001	0.001	0.002	0.005	0.033	0.001	0.024	303.716	0.474	NaN	1.316392	0.3622524E-01	-1.439626
05092011	16	0.007	0.010	0.043	0.000	0.001	0.001	0.002	0.005	0.035	0.001	0.025	303.198	0.489	NaN	1.424891	0.3511444E-01	-1.391704
05092011	17	0.008	0.009	0.040	0.000	0.001	0.001	0.002	0.005	0.036	0.001	0.025	302.161	0.513	NaN	1.561684	0.2975064E-01	-1.279903
05092011	18	0.021	0.011	0.039	0.000	0.001	0.001	0.002	0.007	0.034	0.001	0.026	301.006	0.541	NaN	1.988287	0.1443809E-01	-0.8610307
05092011	19	0.065	0.017	0.045	0.000	0.001	0.002	0.004	0.015	0.020	0.001	0.029	299.467	0.590	NaN	2.776489	0.5524111E-04	1.701234
05092011	20	0.103	0.026	0.048	0.000	0.002	0.003	0.005	0.021	0.008	0.002	0.030	297.287	0.633	NaN	3.007261	0.1084970E-04	2.442753
05092011	21	0.106	0.028	0.043	0.000	0.002	0.003	0.005	0.021	0.009	0.003	0.029	295.633	0.677	NaN	3.379908	0.9276789E-05	2.561507
05092011	22	0.092	0.027	0.036	0.000	0.002	0.002	0.004	0.018	0.015	0.003	0.028	294.434	0.715	NaN	3.786170	0.1469959E-04	2.410895
05092011	23	0.079	0.026	0.030	0.000	0.002	0.002	0.004	0.014	0.020	0.003	0.027	293.457	0.753	NaN	4.326540	0.2196966E-04	2.294317
05092011	24	0.069	0.029	0.023	0.001	0.002	0.001	0.004	0.012	0.023	0.003	0.026	292.514	0.800	0.1496589	2.824322	0.1876267E-04	2.177619
05102011	01	0.061	0.037	0.019	0.001	0.002	0.001	0.003	0.010	0.024	0.003	0.024	291.658	0.854	0.2141780	3.847135	0.2069104E-04	2.269355
05102011	02	0.058	0.041	0.015	0.001	0.002	0.001	0.003	0.010	0.025	0.004	0.023	291.107	0.883	0.2882692	4.667261	0.1772771E-04	2.420410
05102011	03	0.057	0.049	0.014	0.001	0.002	0.001	0.003	0.010	0.025	0.005	0.023	290.819	0.892	0.3282560	5.267487	0.1792874E-04	2.468054
05102011	04	0.064	0.057	0.015	0.001	0.002	0.001	0.003	0.010	0.026	0.006	0.023	290.697	0.890	0.3745445	5.631476	0.1634294E-04	2.537292
05102011	05	0.085	0.066	0.015	0.001	0.002	0.001	0.004	0.012	0.026	0.010	0.023	290.610	0.888	0.4796268	5.946471	0.1018582E-04	2.766263
05102011	06	0.122	0.078	0.014	0.002	0.002	0.002	0.005	0.015	0.025	0.016	0.024	290.531	0.889	0.6344968	7.051591	0.6347002E-05	3.045718
05102011	07	0.152	0.093	0.015	0.003	0.002	0.004	0.006	0.020	0.029	0.027	0.025	291.437	0.890	0.6705501	7.987036	0.6346941E-05	3.099821
05102011	08	0.139	0.099	0.040	0.002	0.002	0.004	0.007	0.025	0.035	0.034	0.027	295.050	0.830	0.1693754	1.930081	0.2055491E-05	2.972660
05102011	09	0.071	0.127	0.077	0.000	0.002	0.003	0.004	0.016	0.027	0.010	0.029	297.992	0.725	NaN	7.296883	0.2068930E-02	0.5473915
05102011	10	0.024	0.167	0.098	0.000	0.001	0.001	0.003	0.009	0.043	0.002	0.033	300.024	0.628	NaN	3.286784	0.7253746E-01	-1.343791
05102011	11	0.005	0.164	0.097	0.000	0.001	0.001	0.002	0.006	0.049	0.001	0.034	301.755	0.562	0.7125139E-02	2.634254	0.5546935E-02	-0.3233955
05102011	12	0.005	0.127	0.085	0.000	0.001	0.001	0.002	0.005	0.044	0.001	0.031	303.267	0.509	0.5397975E-02	2.018199	0.5427632E-02	-0.4296463
05102011	13	0.005	0.104	0.074	0.000	0.001	0.001	0.002	0.005	0.043	0.000	0.030	304.631	0.468	0.4974544E-02	1.857416	0.5827450E-02	-0.4965693
05102011	14	0.006	0.091	0.063	0.000	0.001	0.001	0.002	0.005	0.042	0.000	0.029	305.263	0.452	0.5379975E-02	1.917513	0.6292488E-02	-0.5160841
05102011	15	0.009	0.077	0.052	0.000	0.001	0.001	0.002	0.005	0.039	0.001	0.027	304.999	0.459	NaN	1.445703	0.4180267E-01	-1.461125
05102011	16	0.013	0.062	0.043	0.000	0.001	0.001	0.002	0.005	0.035	0.001	0.025	304.271	0.481	NaN	1.498489	0.2801997E-01	-1.271814
05102011	17	0.010	0.039	0.032	0.000	0.001	0.001	0.002	0.005	0.036	0.001	0.024	303.228	0.508	NaN	1.585062	0.1663414E-01	-1.020954
05102011	18	0.027	0.035	0.028	0.000	0.001	0.001	0.002	0.007	0.033	0.001	0.026	301.951	0.538	NaN	2.082507	0.1795954E-02	0.6429128E-01
05102011	19	0.075	0.044	0.028	0.001	0.002	0.002	0.004	0.015	0.016	0.001	0.027	300.186	0.602	0.1089579E-01	1.121223	0.2084490E-04	1.730692
05102011	20	0.095	0.049	0.022	0.001	0.002	0.002	0.005	0.020	0.006	0.001	0.028	298.374	0.634	0.2558386E-01	0.8455327	0.3446236E-05	2.389785
05102011	21	0.090	0.051	0.017	0.001	0.002	0.002	0.005	0.020	0.009	0.001	0.029	297.131	0.661	0.3321421E-01	1.032734	0.5104995E-05	2.305993
05102011	22	0.075	0.049	0.014	0.001	0.002	0.002	0.005	0.018	0.016	0.002	0.030	295.838	0.723	0.5267382E-01	1.642002	0.1250273E-04	2.118369
05102011	23	0.057	0.044	0.013	0.001	0.002	0.002	0.004	0.014	0.026	0.001	0.030	294.751	0.753	0.6847095E-01	2.395184	0.2930898E-04	1.912338
05102011	24	0.051	0.045	0.015	0.001	0.002	0.001	0.004	0.013	0.030	0.002	0.031	294.085	0.769	0.7784140E-01	2.855001	0.4487555E-04	1.803596
05112011	01	0.051	0.052	0.016	0.001	0.002	0.001	0.004	0.013	0.030	0.002	0.031	293.040	0.820	0.1289777	3.688771	0.3857598E-04	1.980565
05112011	02	0.049	0.062	0.019	0.001	0.002	0.001	0.004	0.013	0.030	0.003	0.030	292.320	0.853	0.1780648	4.380843	0.3272982E-04	2.126614
05112011	03	0.048	0.068	0.021	0.001	0.002	0.001	0.004	0.013	0.030	0.004	0.029	291.878	0.868	0.2260707	5.082220	0.2879748E-04	2.246699
05112011	04	0.053	0.076	0.023	0.001	0.002	0.001	0.004	0.014	0.027	0.006	0.028	291.606	0.875	0.2739860	5.404661	0.2218531E-04	2.386703
05112011	05	0.072	0.088	0.023	0.001	0.002	0.002	0.004	0.015	0.024	0.009	0.026	291.419	0.883	0.3784277	5.428020	0.1128795E-04	2.682026
05112011	06	0.101	0.101	0.021	0.002	0.003	0.002	0.005	0.018	0.021	0.016	0.025	291.347	0.890	0.5510260	6.707339	0.7072563E-05	2.976973
05112011	07	0.120	0.111	0.026	0.002	0.003	0.003	0.006	0.022	0.023	0.021	0.024	292.319	0.893	0.4559678	5.363292	0.7357125E-05	2.862723
05112011	08	0.105	0.104	0.044	0.002	0.003	0.004	0.007	0.025	0.022	0.021	0.023	295.932	0.826	0.1505613E-03	0.1227592E-02	0.4457007E-08	2.440011
05112011	09	0.056	0.094	0.065	0.000	0.002	0.002	0.004	0.016	0.010	0.006	0.020	298.705	0.704	NaN	4.215557	0.3876747E-02	0.3638752E-01
05112011	10	0.024	0.074	0.060	0.000	0.002	0.001	0.002	0.007	0.017	0.001	0.018	300.422	0.608	NaN	1.956823	0.3398537E-01	-1.239740
05112011	11	0.016	0.065	0.052	0.000	0.001	0.001	0.002	0.005	0.021	0.001	0.018	301.861	0.552	NaN	1.448314	0.3548805E-01	-1.389220
05112011	12	0.014	0.065	0.053	0.000	0.001	0.001	0.002	0.005	0.023	0.001	0.018	303.298	0.504	NaN	1.216931	0.3663183E-01	-1.478593
05112011	13	0.013	0.064	0.056	0.000	0.001	0.001	0.002	0.005	0.025	0.001	0.019	304.692	0.458	NaN	1.093717	0.4071731E-01	-1.570874
05112011	14	0.014	0.066	0.062	0.000	0.001	0.001	0.002	0.005	0.027	0.001	0.021	305.263	0.441	NaN	1.109342	0.4784677E-01	-1.634787
05112011	15	0.016	0.070	0.065	0.000	0.001	0.001	0.002	0.006	0.029	0.001	0.022	305.022	0.442	NaN	1.171984	0.4658851E-01	-1.599357
05112011	16	0.020	0.072	0.065	0.000	0.001	0.001	0.002	0.006	0.030	0.001	0.023	304.447	0.451	NaN	1.321306	0.4316407E-01	-1.514119
05112011	17	0.022	0.068	0.061	0.000	0.001	0.001	0.002	0.006	0.030	0.001	0.023	303.562	0.463	NaN	1.406239	0.3683118E-01	-1.418156
05112011	18	0.033	0.064	0.054	0.000	0.001	0.001	0.002	0.008	0.026	0.000	0.023	302.588	0.473	NaN	1.545573	0.1653078E-01	-1.029204
05112011	19	0.070	0.064	0.055	0.000	0.001	0.002	0.004	0.014	0.012	0.001	0.024	300.936	0.510	NaN	1.994103	0.3296211E-04	1.781733
05112011	20	0.114	0.068	0.059	0.000	0.002	0.002	0.005	0.023	0.001	0.001	0.025	298.806	0.535	NaN	1.656514	0.3448224E-05	2.681600
05112011	21	0.126	0.069	0.056	0.000	0.002	0.003	0.006	0.025	0.000	0.001	0.024	297.073	0.574	NaN	1.753730	0.3779573E-05	2.666520
05112011	22	0.125	0.065	0.049	0.000	0.002	0.003	0.006	0.025	0.001	0.001	0.023	295.691	0.624	NaN	1.936321	0.4187438E-05	2.665029
05112011	23	0.117	0.059	0.039	0.000	0.002	0.002	0.006	0.023	0.001	0.001	0.022	294.549	0.679	NaN	2.047865	0.5188289E-05	2.596277
05112011	24	0.107	0.058	0.029	0.000	0.002	0.002	0.005	0.021	0.001	0.001	0.021	293.538	0.738	NaN	2.081451	0.6285330E-05	2.520038
05122011	01	0.099	0.062	0.023	0.001	0.002	0.002	0.005	0.019	0.002	0.002	0.021	292.624	0.802	0.7422614E-01	0.4914726	0.2816436E-06	3.241799
05122011	02	0.092	0.066	0.019	0.001	0.002	0.002	0.005	0.017	0.004	0.004	0.021	292.044	0.840	0.2113957	1.503201	0.1311319E-05	3.059309
05122011	03	0.090	0.069	0.016	0.001	0.002	0.002	0.005	0.017	0.005	0.005	0.021	291.719	0.855	0.2582094	1.829470	0.1555635E-05	3.070418
05122011	04	0.097	0.070	0.015	0.001	0.002	0.002	0.005	0.018	0.006	0.005	0.021	291.508	0.862	0.2269737	1.422688	0.1051494E-05	3.131303
05122011	05	0.117	0.068	0.016	0.001	0.002	0.002	0.005	0.019	0.005	0.005	0.022	291.359	0.866	0.3024563	1.875963	0.1317984E-05	3.153314
05122011	06	0.154	0.070	0.016	0.001	0.002	0.003	0.006	0.023	0.004	0.004	0.023	291.313	0.871	0.1525283E-03	0.5499583E-03	0.9823650E-09	2.748057
05122011	07	0.186	0.074	0.021	0.001	0.002	0.004	0.007	0.028	0.008	0.008	0.025	292.295	0.875	0.2161320	1.244086	0.2126004E-05	2.767286
05122011	08	0.154	0.066	0.042	0.001	0.003	0.005	0.009	0.034	0.017	0.017	0.026	295.555	0.812	0.3337264E-03	0.2114798E-02	0.5100865E-08	2.617625
05122011	09	0.079	0.073	0.072	0.000	0.002	0.003	0.006	0.022	0.016	0.008	0.029	298.216	0.707	NaN	5.718661	0.8997932E-04	1.803152
05122011	10	0.030	0.122	0.106	0.000	0.002	0.002	0.004	0.014	0.038	0.004	0.035	300.352	0.610	NaN	3.271863	0.7119101E-01	-1.337630
05122011	11	0.005	0.161	0.121	0.000	0.002	0.001	0.003	0.009	0.054	0.001	0.039	302.206	0.533	0.7103682E-02	2.974768	0.6317108E-02	-0.3270652
05122011	12	0.005	0.126	0.106	0.000	0.002	0.001	0.003	0.007	0.049	0.000	0.036	303.780	0.476	0.5052745E-02	2.152040	0.5970615E-02	-0.4431689
05122011	13	0.006	0.089	0.082	0.000	0.001	0.001	0.003	0.006	0.043	0.000	0.031	304.867	0.438	0.4781365E-02	1.894330	0.6232378E-02	-0.5171981
05122011	14	0.008	0.067	0.063	0.000	0.001	0.001	0.002	0.005	0.037	0.001	0.026	304.719	0.424	NaN	1.202797	0.5521456E-01	-1.661861
05122011	15	0.006	0.057	0.053	0.000	0.001	0.001	0.002	0.005	0.037	0.000	0.026	305.115	0.420	0.5289137E-02	1.701087	0.6082953E-02	-0.5533879
05122011	16	0.005	0.048	0.045	0.000	0.001	0.001	0.002	0.004	0.038	0.000	0.026	304.673	0.420	0.5371332E-02	1.548880	0.5621505E-02	-0.5598348
05122011	17	0.008	0.043	0.039	0.000	0.001	0.001	0.002	0.004	0.042	0.000	0.027	303.464	0.430	NaN	1.361675	0.2754720E-01	-1.306004
05122011	18	0.028	0.046	0.035	0.001	0.001	0.001	0.002	0.006	0.038	0.001	0.028	302.460	0.439	0.5292714E-02	1.213861	0.9699779E-04	1.097407
05122011	19	0.065	0.051	0.032	0.001	0.002	0.002	0.003	0.011	0.025	0.001	0.028	300.676	0.488	0.6241322E-02	1.145935	0.6391477E-04	1.253559
05122011	20	0.081	0.054	0.028	0.001	0.002	0.002	0.004	0.015	0.015	0.001	0.027	296.332	0.558	0.2412349E-01	1.009946	0.1585511E-04	1.804129
05122011	21	0.073	0.060	0.021	0.001	0.002	0.002	0.004	0.015	0.014	0.001	0.026	294.855	0.578	0.3268707E-01	0.9912565	0.1258561E-04	1.896312
05122011	22	0.066	0.063	0.018	0.001	0.001	0.002	0.004	0.014	0.015	0.001	0.025	294.121	0.592	0.3390282E-01	1.000060	0.1386856E-04	1.857995
05122011	23	0.059	0.066	0.016	0.001	0.001	0.001	0.004	0.013	0.019	0.001	0.025	292.942	0.657	0.4990339E-01	1.284305	0.2153283E-04	1.775567
05122011	24	0.050	0.061	0.014	0.001	0.001	0.001	0.003	0.012	0.022	0.001	0.025	292.206	0.713	0.6571412E-01	1.663462	0.2879416E-04	1.761708
05132011	01	0.045	0.058	0.013	0.001	0.001	0.001	0.003	0.011	0.025	0.001	0.026	291.485	0.771	0.1000438	2.407131	0.3546809E-04	1.831662
05132011	02	0.040	0.062	0.013	0.001	0.001	0.001	0.003	0.010	0.027	0.001	0.026	290.995	0.811	0.1286895	3.090491	0.3987449E-04	1.889332
05132011	03	0.038	0.074	0.014	0.001	0.001	0.001	0.003	0.010	0.028	0.002	0.026	290.720	0.832	0.1504554	3.498088	0.3904833E-04	1.952228
05132011	04	0.045	0.092	0.015	0.001	0.001	0.001	0.003	0.011	0.027	0.003	0.026	290.523	0.847	0.2044184	3.902704	0.2858098E-04	2.135288
05132011	05	0.068	0.110	0.017	0.001	0.001	0.001	0.004	0.014	0.023	0.005	0.026	290.347	0.860	0.3122318	3.976835	0.1265159E-04	2.497392
05132011	06	0.108	0.128	0.015	0.002	0.002	0.003	0.005	0.019	0.016	0.009	0.026	290.270	0.875	0.5732921	4.814021	0.3435944E-05	3.146462
05132011	07	0.142	0.146	0.018	0.002	0.002	0.004	0.007	0.026	0.016	0.014	0.027	291.283	0.888	0.4453591	3.525082	0.4072087E-05	2.937352
05132011	08	0.115	0.132	0.035	0.001	0.003	0.005	0.008	0.032	0.014	0.013	0.027	294.887	0.800	0.3510118E-03	0.1691046E-02	0.4784726E-08	2.548298
05132011	09	0.052	0.167	0.050	0.001	0.002	0.003	0.005	0.019	0.009	0.004	0.025	297.418	0.711	0.4597563E-01	0.9957373	0.1270332E-05	2.894228
05132011	10	0.023	0.167	0.059	0.000	0.002	0.002	0.003	0.011	0.021	0.002	0.025	299.702	0.618	NaN	2.349223	0.3296451E-01	-1.147122
05132011	11	0.011	0.117	0.061	0.000	0.002	0.001	0.003	0.007	0.030	0.001	0.026	301.325	0.544	NaN	1.667868	0.5081925E-01	-1.483867
05132011	12	0.006	0.075	0.055	0.000	0.001	0.001	0.003	0.006	0.033	0.001	0.025	302.619	0.495	NaN	1.383888	0.4789326E-01	-1.539174
05132011	13	0.004	0.050	0.045	0.000	0.001	0.001	0.002	0.005	0.034	0.000	0.025	303.711	0.468	0.5666375E-02	1.562431	0.4986733E-02	-0.5040151
05132011	14	0.004	0.036	0.038	0.000	0.001	0.001	0.002	0.004	0.035	0.000	0.026	303.872	0.461	0.5011082E-02	1.287975	0.4528384E-02	-0.5460358
05132011	15	0.004	0.025	0.035	0.000	0.001	0.001	0.002	0.004	0.038	0.000	0.027	301.907	0.490	0.7306874E-02	1.593272	0.4462112E-02	-0.4472506
05132011	16	0.003	0.020	0.032	0.000	0.001	0.001	0.002	0.004	0.042	0.000	0.030	301.259	0.520	0.1848698E-02	1.740505	0.4573706E-02	-0.4195930
05132011	17	0.002	0.020	0.028	0.000	0.001	0.001	0.002	0.004	0.042	0.000	0.031	299.905	0.557	0.8187890E-03	1.937963	0.4934594E-02	-0.4059060
05132011	18	0.003	0.023	0.024	0.000	0.001	0.001	0.002	0.004	0.045	0.000	0.031	298.105	0.608	0.7846713E-02	2.394756	0.4031293E-02	-0.2261831
05132011	19	0.011	0.027	0.020	0.000	0.001	0.001	0.002	0.006	0.047	0.001	0.031	296.272	0.665	NaN	3.295816	0.5649063E-02	-0.2340135
05132011	20	0.033	0.034	0.016	0.000	0.001	0.001	0.003	0.009	0.042	0.001	0.033	294.472	0.720	NaN	4.071844	0.1888022E-03	1.333784
05132011	21	0.052	0.038	0.016	0.001	0.001	0.002	0.004	0.013	0.034	0.002	0.033	293.108	0.761	0.1049638	3.117669	0.4234265E-04	1.867052
05132011	22	0.056	0.041	0.019	0.001	0.001	0.002	0.004	0.014	0.032	0.003	0.033	292.305	0.780	0.1420313	3.327690	0.3335655E-04	1.998962
05132011	23	0.056	0.045	0.023	0.001	0.001	0.002	0.004	0.014	0.033	0.004	0.032	291.756	0.787	0.1711156	3.450773	0.2770705E-04	2.095326
05132011	24	0.053	0.051	0.026	0.001	0.001	0.002	0.004	0.012	0.036	0.005	0.031	291.304	0.804	0.1989313	3.937875	0.3026627E-04	2.114303
05142011	01	0.046	0.055	0.029	0.001	0.001	0.001	0.004	0.011	0.038	0.006	0.031	290.776	0.832	0.2234601	4.956091	0.4169610E-04	2.075044
05142011	02	0.037	0.057	0.031	0.001	0.001	0.001	0.003	0.011	0.038	0.007	0.029	290.446	0.856	0.2413220	5.758764	0.4374030E-04	2.119447
05142011	03	0.032	0.058	0.032	0.001	0.001	0.001	0.003	0.010	0.036	0.008	0.028	290.299	0.870	0.2258590	6.175703	0.5315386E-04	2.065151
05142011	04	0.015	0.042	0.032	0.002	0.001	0.001	0.003	0.008	0.040	0.005	0.028	290.274	0.872	0.1328542	5.941719	0.1083631E-03	1.739030
05142011	05	0.002	0.024	0.025	0.002	0.001	0.001	0.002	0.004	0.044	0.002	0.029	290.073	0.896	0.1507401E-03	8.830791	0.2532323E-02	0.5424804
05142011	06	0.005	0.020	0.018	0.003	0.001	0.001	0.001	0.003	0.046	0.002	0.026	290.027	0.909	0.1048355	8.749393	0.2737740E-03	1.504586
05142011	07	0.022	0.025	0.015	0.004	0.001	0.001	0.001	0.002	0.042	0.004	0.022	291.168	0.901	0.1970720	7.510509	0.8117077E-04	1.966270
05142011	08	0.004	0.035	0.011	0.000	0.001	0.000	0.001	0.001	0.025	0.001	0.015	292.604	0.875	NaN	4.371789	0.5697059E-02	-0.1149915
05142011	09	0.002	0.023	0.013	0.000	0.000	0.000	0.000	0.001	0.027	0.000	0.016	293.536	0.819	0.1411486E-01	2.809580	0.2593515E-02	0.3475271E-01
05142011	10	0.001	0.022	0.021	0.000	0.000	0.000	0.000	0.001	0.021	0.000	0.018	294.549	0.768	0.3708005E-03	2.426258	0.3588034E-02	-0.1699196
05142011	11	0.000	0.021	0.030	0.000	0.000	0.000	0.000	0.001	0.021	0.000	0.020	295.433	0.715	0.1206994E-03	2.261889	0.2720368E-02	-0.8015633E-01
05142011	12	0.000	0.019	0.031	0.000	0.000	0.000	0.000	0.001	0.022	0.000	0.021	296.083	0.667	0.6556511E-04	1.955944	0.2090325E-02	-0.2885739E-01
05142011	13	0.000	0.020	0.029	0.000	0.001	0.000	0.001	0.002	0.023	0.000	0.023	297.026	0.606	0.5418062E-04	1.635013	0.1609870E-02	0.6730543E-02
05142011	14	0.000	0.020	0.024	0.000	0.001	0.000	0.001	0.002	0.023	0.000	0.023	298.141	0.533	0.2181530E-04	1.222413	0.1027650E-02	0.7537252E-01
05142011	15	0.001	0.017	0.020	0.000	0.001	0.000	0.001	0.002	0.024	0.000	0.021	297.082	0.544	0.5012751E-04	1.098779	0.9833239E-02	-0.9517863
05142011	16	0.001	0.018	0.018	0.000	0.001	0.000	0.001	0.002	0.024	0.000	0.018	297.624	0.530	0.1540184E-03	0.9566842	0.4693512E-02	-0.6907293
05142011	17	0.004	0.016	0.014	0.000	0.001	0.000	0.001	0.002	0.021	0.000	0.014	296.356	0.543	NaN	0.9386294	0.1025662E-01	-1.038510
05142011	18	0.012	0.016	0.011	0.001	0.001	0.000	0.001	0.002	0.015	0.000	0.011	295.497	0.548	0.7883370E-02	0.6642301	0.5843472E-04	1.055647
05142011	19	0.026	0.018	0.008	0.001	0.001	0.001	0.001	0.003	0.007	0.000	0.008	294.334	0.563	0.5847871E-02	0.4410132	0.1947616E-04	1.354948
05142011	20	0.030	0.012	0.006	0.001	0.001	0.001	0.001	0.004	0.001	0.000	0.007	293.153	0.587	0.9443760E-02	0.3133580	0.3792547E-05	1.917110
05142011	21	0.027	0.009	0.005	0.001	0.002	0.001	0.002	0.005	0.000	0.000	0.006	292.256	0.619	0.1113784E-01	0.5421715E-01	0.1940585E-07	3.446204
05142011	22	0.024	0.007	0.005	0.001	0.002	0.001	0.002	0.004	0.000	0.000	0.006	291.407	0.652	0.4308450E-01	0.2099258	0.4951681E-06	2.627313
05142011	23	0.020	0.006	0.005	0.001	0.002	0.001	0.001	0.004	0.001	0.000	0.007	290.591	0.692	0.3153759E-01	0.4322942	0.2596376E-05	2.221412
05142011	24	0.016	0.006	0.005	0.001	0.002	0.001	0.001	0.004	0.006	0.000	0.008	289.920	0.728	0.2771455E-01	0.6078382	0.8116123E-05	1.874439
05152011	01	0.012	0.006	0.005	0.001	0.002	0.001	0.001	0.003	0.012	0.000	0.011	289.260	0.767	0.3131449E-01	1.285156	0.4801026E-04	1.427622
05152011	02	0.007	0.006	0.006	0.001	0.001	0.000	0.001	0.003	0.018	0.000	0.013	288.723	0.793	0.3055644E-01	1.644482	0.1079885E-03	1.182652
05152011	03	0.003	0.005	0.007	0.000	0.001	0.000	0.001	0.003	0.022	0.000	0.015	288.350	0.803	NaN	2.326063	0.2996302E-02	-0.1099641
05152011	04	0.003	0.005	0.007	0.000	0.001	0.000	0.001	0.003	0.023	0.000	0.015	288.050	0.807	NaN	2.539130	0.2234074E-02	0.5558740E-01
05152011	05	0.005	0.006	0.008	0.000	0.001	0.000	0.001	0.003	0.023	0.000	0.016	287.788	0.808	NaN	2.728673	0.2922647E-02	-0.2982489E-01
05152011	06	0.009	0.007	0.009	0.000	0.001	0.001	0.001	0.004	0.023	0.001	0.017	287.568	0.809	NaN	3.310394	0.6948180E-03	0.6780086
05152011	07	0.009	0.008	0.010	0.000	0.001	0.001	0.001	0.004	0.025	0.001	0.018	288.307	0.769	NaN	2.911689	0.1125497E-02	0.4128006
05152011	08	0.005	0.010	0.013	0.000	0.001	0.001	0.001	0.003	0.027	0.000	0.018	288.977	0.735	NaN	2.477742	0.5368885E-02	-0.3358280
05152011	09	0.002	0.013	0.017	0.000	0.001	0.000	0.001	0.003	0.028	0.000	0.018	289.068	0.722	0.2967632E-01	2.376618	0.2217425E-02	0.3011046E-01
05152011	10	0.005	0.018	0.020	0.000	0.001	0.001	0.001	0.003	0.027	0.001	0.018	289.649	0.698	NaN	2.151754	0.1330289E-01	-0.7911536
05152011	11	0.002	0.019	0.028	0.000	0.001	0.001	0.001	0.003	0.029	0.000	0.019	290.234	0.676	0.2292317E-01	2.471201	0.2538136E-02	-0.1160677E-01
05152011	12	0.002	0.017	0.029	0.000	0.001	0.001	0.001	0.003	0.028	0.000	0.020	290.887	0.645	0.1570189E-01	1.756337	0.2197335E-02	-0.9728853E-01
05152011	13	0.004	0.019	0.026	0.000	0.001	0.001	0.001	0.003	0.028	0.000	0.019	290.804	0.641	NaN	1.777063	0.2094377E-01	-1.071352
05152011	14	0.011	0.022	0.021	0.001	0.001	0.001	0.001	0.003	0.023	0.000	0.017	290.773	0.638	0.1452297E-01	1.415879	0.1937979E-03	0.8636770
05152011	15	0.015	0.019	0.018	0.001	0.002	0.001	0.001	0.004	0.021	0.001	0.016	290.422	0.646	0.2531451E-01	1.292724	0.8644874E-04	1.174747
05152011	16	0.018	0.018	0.016	0.001	0.002	0.001	0.002	0.004	0.019	0.001	0.016	290.000	0.658	0.3262228E-01	1.319262	0.6675745E-04	1.295831
05152011	17	0.023	0.017	0.014	0.001	0.002	0.001	0.002	0.005	0.015	0.001	0.015	289.658	0.665	0.4081178E-01	1.153952	0.3764232E-04	1.486511
05152011	18	0.024	0.017	0.012	0.001	0.002	0.001	0.002	0.006	0.013	0.001	0.015	289.176	0.681	0.4626966E-01	1.081417	0.2857897E-04	1.577947
05152011	19	0.022	0.018	0.010	0.001	0.002	0.001	0.002	0.006	0.013	0.001	0.014	288.659	0.707	0.5490905E-01	1.069702	0.2138536E-04	1.699146
05152011	20	0.019	0.017	0.008	0.001	0.002	0.001	0.002	0.005	0.013	0.000	0.014	288.114	0.725	0.5788565E-01	1.261632	0.3104640E-04	1.608922
05152011	21	0.014	0.014	0.008	0.001	0.002	0.001	0.002	0.005	0.018	0.000	0.016	288.002	0.741	0.5665857E-01	1.570693	0.5318820E-04	1.470276
05152011	22	0.006	0.012	0.008	0.001	0.002	0.001	0.002	0.004	0.029	0.000	0.021	287.831	0.755	0.4309893E-01	2.526302	0.2035299E-03	1.093857
05152011	23	0.003	0.010	0.008	0.001	0.002	0.001	0.002	0.005	0.034	0.000	0.023	287.184	0.783	0.5398148E-01	2.892994	0.2145532E-03	1.129813
05152011	24	0.004	0.009	0.007	0.001	0.002	0.001	0.002	0.006	0.031	0.000	0.023	286.809	0.810	0.6510514E-01	3.122789	0.1843819E-03	1.228824
05162011	01	0.002	0.008	0.007	0.001	0.002	0.001	0.002	0.006	0.030	0.000	0.022	286.533	0.831	0.1327097E-02	5.620710	0.2028480E-02	0.4426204
05162011	02	0.002	0.007	0.007	0.001	0.002	0.001	0.002	0.006	0.026	0.000	0.020	286.326	0.843	0.1123250E-02	5.522643	0.1924425E-02	0.4578461
05162011	03	0.002	0.006	0.006	0.001	0.002	0.001	0.002	0.006	0.022	0.000	0.019	286.215	0.846	0.7066727E-03	4.729552	0.1689741E-02	0.4469998
05162011	04	0.003	0.005	0.006	0.001	0.001	0.001	0.002	0.006	0.021	0.000	0.017	286.104	0.849	0.1058400E-02	5.611574	0.1881648E-02	0.4745463
05162011	05	0.012	0.006	0.006	0.001	0.001	0.001	0.002	0.007	0.017	0.001	0.018	286.035	0.847	0.1118107	2.582993	0.5427385E-04	1.677533
05162011	06	0.033	0.009	0.006	0.001	0.002	0.002	0.003	0.011	0.010	0.003	0.018	286.028	0.847	0.3215072	2.073031	0.4922768E-05	2.624396
05162011	07	0.038	0.010	0.007	0.002	0.002	0.002	0.004	0.013	0.007	0.004	0.019	286.459	0.845	0.3565155	2.043623	0.2861862E-05	2.853752
05162011	08	0.022	0.008	0.009	0.001	0.002	0.001	0.003	0.009	0.016	0.003	0.019	286.871	0.849	0.1891398	2.595444	0.2125727E-04	2.086704
05162011	09	0.007	0.007	0.010	0.001	0.001	0.001	0.002	0.006	0.022	0.001	0.018	287.808	0.837	0.6365502E-01	2.626116	0.8833133E-04	1.473199
05162011	10	0.003	0.007	0.011	0.001	0.001	0.001	0.001	0.003	0.023	0.001	0.015	288.509	0.799	0.2707547E-01	2.109152	0.1699417E-03	1.093808
05162011	11	0.002	0.006	0.012	0.000	0.001	0.000	0.001	0.002	0.020	0.000	0.013	289.377	0.782	NaN	1.898829	0.8544235E-02	-0.6531875
05162011	12	0.002	0.006	0.015	0.000	0.001	0.000	0.001	0.002	0.018	0.000	0.012	289.850	0.756	NaN	1.604117	0.1187457E-01	-0.8693819
05162011	13	0.004	0.008	0.023	0.001	0.001	0.000	0.001	0.001	0.019	0.000	0.012	289.541	0.752	0.1490402E-01	1.537402	0.2096632E-03	0.8652654
05162011	14	0.010	0.009	0.027	0.001	0.001	0.001	0.001	0.002	0.019	0.001	0.013	290.509	0.718	0.1859766E-01	1.458257	0.1162795E-03	1.098331
05162011	15	0.007	0.010	0.023	0.000	0.001	0.001	0.001	0.003	0.017	0.000	0.013	290.394	0.676	NaN	1.567779	0.1378275E-01	-0.9440510
05162011	16	0.006	0.009	0.019	0.000	0.001	0.000	0.001	0.003	0.018	0.000	0.013	291.227	0.651	NaN	1.259321	0.1220433E-01	-0.9863775
05162011	17	0.005	0.009	0.017	0.000	0.001	0.000	0.001	0.002	0.018	0.000	0.013	289.357	0.690	NaN	1.403534	0.1322858E-01	-0.9742903
05162011	18	0.012	0.009	0.013	0.000	0.001	0.001	0.001	0.004	0.017	0.000	0.013	288.953	0.705	NaN	1.898088	0.2295070E-03	0.9175204
05162011	19	0.015	0.011	0.012	0.001	0.001	0.001	0.001	0.004	0.017	0.000	0.014	288.346	0.715	0.4184294E-01	1.339819	0.5717211E-04	1.369862
05162011	20	0.013	0.011	0.013	0.001	0.001	0.001	0.001	0.004	0.020	0.001	0.016	287.954	0.721	0.4300714E-01	1.592734	0.8814952E-04	1.256923
05162011	21	0.012	0.010	0.014	0.001	0.001	0.001	0.001	0.004	0.023	0.001	0.017	287.198	0.750	0.6111729E-01	1.929588	0.8926831E-04	1.334767
05162011	22	0.013	0.009	0.014	0.001	0.001	0.001	0.002	0.005	0.024	0.001	0.018	286.659	0.773	0.9252954E-01	2.112491	0.6217499E-04	1.531179
05162011	23	0.012	0.009	0.012	0.001	0.001	0.001	0.002	0.004	0.025	0.001	0.019	286.277	0.782	0.8884543E-01	2.488154	0.9751436E-04	1.406809
05162011	24	0.011	0.009	0.010	0.001	0.002	0.000	0.001	0.004	0.024	0.001	0.018	286.006	0.785	0.7682437E-01	2.378115	0.1232833E-03	1.285329
05172011	01	0.012	0.008	0.009	0.001	0.002	0.000	0.001	0.004	0.018	0.001	0.014	285.747	0.788	0.8051687E-01	1.728227	0.6110000E-04	1.451559
05172011	02	0.012	0.007	0.009	0.001	0.002	0.000	0.001	0.003	0.015	0.001	0.012	285.456	0.790	0.7340777E-01	1.558201	0.5658733E-04	1.439904
05172011	03	0.011	0.007	0.009	0.001	0.002	0.000	0.001	0.003	0.016	0.001	0.012	285.126	0.789	0.7901180E-01	1.563913	0.5486711E-04	1.454900
05172011	04	0.013	0.007	0.010	0.001	0.002	0.000	0.001	0.003	0.020	0.002	0.014	284.898	0.780	0.1063583	1.854581	0.5995359E-04	1.490431
05172011	05	0.019	0.008	0.011	0.001	0.002	0.001	0.001	0.004	0.025	0.003	0.017	284.602	0.774	0.2025297	2.266755	0.3692527E-04	1.788081
05172011	06	0.026	0.009	0.010	0.001	0.002	0.001	0.002	0.005	0.032	0.006	0.021	284.364	0.768	0.3151093	2.897044	0.3181659E-04	1.959301
05172011	07	0.028	0.009	0.011	0.001	0.002	0.001	0.002	0.006	0.037	0.007	0.023	284.679	0.752	0.3244249	2.871092	0.3070956E-04	1.970773
05172011	08	0.020	0.014	0.019	0.001	0.002	0.001	0.002	0.004	0.042	0.008	0.024	286.004	0.707	0.1911904	2.786558	0.6236705E-04	1.650113
05172011	09	0.014	0.020	0.031	0.001	0.001	0.001	0.001	0.003	0.039	0.005	0.022	286.987	0.663	0.8608133E-01	2.153347	0.1085039E-03	1.297668
05172011	10	0.011	0.020	0.036	0.000	0.001	0.000	0.001	0.003	0.039	0.002	0.023	287.082	0.645	NaN	2.520855	0.2493276E-01	-0.9952223
05172011	11	0.009	0.018	0.038	0.000	0.001	0.000	0.001	0.003	0.042	0.002	0.025	287.983	0.609	NaN	2.271893	0.3025676E-01	-1.124434
05172011	12	0.008	0.017	0.038	0.000	0.001	0.000	0.001	0.003	0.040	0.001	0.024	289.201	0.568	NaN	1.892960	0.3045686E-01	-1.206544
05172011	13	0.007	0.015	0.032	0.000	0.001	0.000	0.001	0.003	0.038	0.001	0.023	289.669	0.536	NaN	1.625196	0.2551290E-01	-1.195854
05172011	14	0.011	0.012	0.028	0.000	0.001	0.000	0.001	0.003	0.038	0.001	0.023	290.022	0.524	NaN	1.624389	0.1730278E-01	-1.027426
05172011	15	0.017	0.011	0.026	0.000	0.001	0.000	0.001	0.003	0.035	0.001	0.021	289.354	0.533	NaN	1.713308	0.8188651E-02	-0.6793768
05172011	16	0.021	0.011	0.022	0.001	0.001	0.001	0.001	0.003	0.034	0.001	0.021	288.845	0.545	0.4754984E-01	1.421193	0.1041862E-03	1.134843
05172011	17	0.023	0.012	0.019	0.001	0.001	0.001	0.001	0.004	0.032	0.001	0.021	288.297	0.562	0.5796540E-01	1.388716	0.8359952E-04	1.220410
05172011	18	0.020	0.013	0.017	0.001	0.001	0.001	0.001	0.004	0.030	0.001	0.020	287.843	0.574	0.5599475E-01	1.345830	0.8414265E-04	1.203974
05172011	19	0.019	0.011	0.012	0.001	0.001	0.001	0.002	0.005	0.027	0.001	0.020	287.386	0.586	0.5993688E-01	1.313072	0.7194626E-04	1.261280
05172011	20	0.018	0.011	0.011	0.001	0.001	0.001	0.002	0.005	0.028	0.001	0.021	286.922	0.606	0.6825465E-01	1.482306	0.8192279E-04	1.257533
05172011	21	0.014	0.011	0.012	0.001	0.001	0.001	0.002	0.005	0.032	0.001	0.023	285.937	0.642	0.8220381E-01	1.822874	0.1088903E-03	1.223767
05172011	22	0.013	0.012	0.012	0.001	0.001	0.001	0.002	0.006	0.034	0.002	0.025	285.143	0.679	0.1076429	2.197873	0.1140502E-03	1.284907
05172011	23	0.014	0.015	0.011	0.001	0.002	0.001	0.003	0.007	0.033	0.003	0.026	284.482	0.716	0.1612881	2.565162	0.8482322E-04	1.480600
05172011	24	0.013	0.017	0.014	0.001	0.002	0.001	0.003	0.008	0.034	0.004	0.026	283.843	0.754	0.2099882	2.836940	0.6665649E-04	1.629008
05182011	01	0.012	0.020	0.016	0.001	0.002	0.001	0.003	0.009	0.036	0.007	0.027	283.210	0.793	0.2681223	3.572553	0.6423050E-04	1.745237
05182011	02	0.011	0.023	0.019	0.001	0.002	0.001	0.004	0.009	0.038	0.010	0.028	282.760	0.819	0.3044137	4.627483	0.7597342E-04	1.784683
05182011	03	0.010	0.026	0.021	0.001	0.003	0.001	0.004	0.010	0.042	0.015	0.028	282.541	0.831	0.3807896	5.326506	0.6025300E-04	1.946464
05182011	04	0.012	0.028	0.021	0.001	0.003	0.001	0.005	0.012	0.047	0.020	0.029	282.445	0.836	0.5003569	6.385700	0.4308654E-04	2.170867
05182011	05	0.019	0.030	0.016	0.002	0.003	0.002	0.005	0.014	0.053	0.030	0.031	282.381	0.839	0.6369351	7.703414	0.3063640E-04	2.400445
05182011	06	0.036	0.034	0.010	0.003	0.003	0.002	0.006	0.019	0.056	0.040	0.033	282.417	0.841	0.7824174	8.566081	0.1530658E-04	2.747904
05182011	07	0.038	0.040	0.011	0.004	0.004	0.003	0.007	0.021	0.063	0.049	0.035	283.209	0.824	0.7731754	8.446391	0.1319200E-04	2.806361
05182011	08	0.015	0.056	0.035	0.002	0.003	0.002	0.005	0.015	0.069	0.036	0.037	285.214	0.744	0.3856460	4.986832	0.3782104E-04	2.120091
05182011	09	0.010	0.062	0.051	0.001	0.003	0.002	0.004	0.011	0.063	0.018	0.038	286.599	0.677	0.1778269	3.694002	0.9537107E-04	1.588081
05182011	10	0.012	0.045	0.057	0.000	0.003	0.001	0.004	0.010	0.058	0.008	0.040	286.853	0.652	NaN	3.875593	0.4433619E-01	-1.058420
05182011	11	0.004	0.038	0.068	0.000	0.003	0.001	0.004	0.010	0.067	0.002	0.045	288.023	0.618	0.3638560E-01	5.041668	0.4578513E-02	0.4184976E-01
05182011	12	0.002	0.037	0.080	0.000	0.002	0.001	0.004	0.010	0.068	0.001	0.048	289.913	0.571	0.2076304E-01	3.314733	0.3889800E-02	-0.6947866E-01
05182011	13	0.001	0.033	0.086	0.000	0.002	0.001	0.003	0.009	0.064	0.001	0.049	292.449	0.517	0.1596928E-02	2.497836	0.7657324E-02	-0.4865132
05182011	14	0.001	0.030	0.081	0.000	0.002	0.001	0.003	0.008	0.062	0.000	0.048	293.028	0.494	0.8480549E-03	2.209739	0.9394063E-02	-0.6285125
05182011	15	0.001	0.030	0.075	0.000	0.002	0.001	0.003	0.008	0.064	0.000	0.047	292.481	0.501	0.2100408E-02	2.345153	0.6345302E-02	-0.4322811
05182011	16	0.001	0.028	0.071	0.000	0.002	0.001	0.003	0.008	0.067	0.000	0.050	291.644	0.517	0.1652241E-02	2.602002	0.8511502E-02	-0.5146986
05182011	17	0.001	0.027	0.066	0.000	0.002	0.001	0.003	0.008	0.071	0.000	0.053	290.914	0.531	0.1631320E-02	2.830276	0.1018672E-01	-0.5562057
05182011	18	0.002	0.028	0.056	0.000	0.002	0.001	0.003	0.010	0.077	0.000	0.055	290.402	0.542	0.7518351E-02	3.147957	0.5262777E-02	-0.2231861
05182011	19	0.015	0.031	0.041	0.000	0.002	0.002	0.004	0.013	0.078	0.002	0.055	290.028	0.553	NaN	3.717973	0.2153319E-01	-0.7628021
05182011	20	0.054	0.036	0.033	0.000	0.002	0.002	0.005	0.020	0.063	0.006	0.054	288.897	0.582	NaN	4.060498	0.9170031E-04	1.646209
05182011	21	0.073	0.038	0.038	0.000	0.002	0.003	0.006	0.024	0.056	0.013	0.052	287.449	0.627	NaN	4.806783	0.3115088E-04	2.188384
05182011	22	0.066	0.036	0.043	0.001	0.002	0.002	0.007	0.024	0.058	0.020	0.050	286.410	0.667	0.4643332	4.243769	0.2054713E-04	2.315001
05182011	23	0.050	0.034	0.049	0.001	0.002	0.002	0.006	0.024	0.064	0.028	0.048	285.573	0.707	0.4960153	5.254476	0.2438603E-04	2.333388
05182011	24	0.034	0.032	0.058	0.001	0.002	0.002	0.006	0.023	0.072	0.035	0.047	284.878	0.750	0.4877979	6.762214	0.3974586E-04	2.230797
05192011	01	0.016	0.031	0.063	0.001	0.002	0.002	0.006	0.022	0.085	0.047	0.047	284.270	0.796	0.4532433	9.314825	0.8453114E-04	2.042158
05192011	02	0.010	0.029	0.070	0.001	0.002	0.002	0.006	0.022	0.090	0.050	0.047	283.904	0.825	0.4417775	11.56270	0.1312944E-03	1.944813
05192011	03	0.009	0.026	0.067	0.001	0.002	0.002	0.006	0.021	0.092	0.052	0.046	283.756	0.835	0.4585821	12.59743	0.1436387E-03	1.943010
05192011	04	0.011	0.025	0.053	0.002	0.002	0.002	0.006	0.021	0.097	0.058	0.045	283.676	0.840	0.5450559	13.26426	0.1085517E-03	2.087046
05192011	05	0.020	0.026	0.031	0.002	0.002	0.002	0.006	0.023	0.105	0.070	0.045	283.627	0.845	0.7196867	15.71288	0.6588249E-04	2.377486
05192011	06	0.050	0.029	0.013	0.004	0.002	0.003	0.007	0.026	0.107	0.081	0.045	283.686	0.850	0.8744811	16.87274	0.2520613E-04	2.825680
05192011	07	0.087	0.034	0.007	0.004	0.003	0.004	0.008	0.031	0.104	0.090	0.045	284.978	0.852	0.9076662	16.69771	0.1402793E-04	3.075663
05192011	08	0.073	0.033	0.023	0.003	0.003	0.004	0.008	0.032	0.098	0.087	0.045	287.929	0.767	0.6988662	8.620831	0.9984958E-05	2.936203
05192011	09	0.033	0.024	0.074	0.001	0.002	0.002	0.005	0.017	0.072	0.028	0.044	290.387	0.664	0.1743107	3.677597	0.4875641E-04	1.877532
05192011	10	0.023	0.043	0.084	0.000	0.002	0.002	0.004	0.012	0.063	0.009	0.043	292.352	0.599	NaN	3.941363	0.5653127E-01	-1.156642
05192011	11	0.015	0.069	0.095	0.000	0.001	0.001	0.003	0.010	0.060	0.004	0.042	294.249	0.547	NaN	2.864904	0.8125085E-01	-1.452718
05192011	12	0.014	0.079	0.118	0.000	0.001	0.001	0.003	0.010	0.057	0.002	0.041	296.002	0.502	NaN	2.331419	0.1047054	-1.652349
05192011	13	0.013	0.079	0.132	0.000	0.001	0.001	0.003	0.009	0.053	0.001	0.038	297.843	0.455	NaN	1.914084	0.1189309	-1.793334
05192011	14	0.010	0.073	0.129	0.000	0.001	0.001	0.002	0.008	0.050	0.001	0.036	298.759	0.432	NaN	1.624736	0.1209883	-1.871960
05192011	15	0.011	0.070	0.123	0.000	0.001	0.001	0.002	0.008	0.050	0.001	0.036	298.960	0.423	NaN	1.585808	0.1139855	-1.856599
05192011	16	0.013	0.069	0.115	0.000	0.001	0.001	0.002	0.008	0.050	0.001	0.036	298.631	0.426	NaN	1.668939	0.1039509	-1.794388
05192011	17	0.016	0.070	0.107	0.000	0.001	0.001	0.003	0.009	0.051	0.001	0.037	298.056	0.430	NaN	1.722244	0.9084900E-01	-1.722226
05192011	18	0.019	0.072	0.099	0.000	0.001	0.001	0.003	0.009	0.051	0.001	0.038	297.377	0.435	NaN	1.852575	0.8158330E-01	-1.643825
05192011	19	0.041	0.075	0.087	0.000	0.001	0.002	0.003	0.013	0.044	0.001	0.038	296.486	0.436	NaN	2.078502	0.4321607E-01	-1.317895
05192011	20	0.092	0.078	0.089	0.000	0.002	0.002	0.005	0.020	0.028	0.003	0.038	294.288	0.465	NaN	2.806584	0.1473353E-03	1.279871
05192011	21	0.109	0.074	0.091	0.000	0.002	0.003	0.006	0.023	0.020	0.004	0.037	292.366	0.512	NaN	3.189852	0.1738507E-04	2.263594
05192011	22	0.101	0.066	0.093	0.000	0.002	0.002	0.006	0.024	0.018	0.007	0.035	290.932	0.563	NaN	3.804150	0.3786328E-04	2.002039
05192011	23	0.089	0.057	0.089	0.000	0.002	0.002	0.006	0.025	0.016	0.010	0.034	289.822	0.617	NaN	4.671989	0.5215156E-03	0.9522346
05192011	24	0.073	0.047	0.078	0.001	0.002	0.002	0.006	0.024	0.017	0.012	0.032	288.818	0.680	0.2461706	2.086588	0.3693312E-05	2.752021
05202011	01	0.058	0.037	0.059	0.001	0.002	0.002	0.006	0.023	0.018	0.014	0.031	287.868	0.755	0.3254331	3.092667	0.6397810E-05	2.684302
05202011	02	0.049	0.028	0.036	0.001	0.002	0.002	0.005	0.021	0.019	0.012	0.029	287.320	0.804	0.3560729	3.166743	0.6822075E-05	2.666696
05202011	03	0.046	0.020	0.023	0.001	0.002	0.002	0.005	0.019	0.019	0.010	0.028	287.091	0.823	0.3740572	3.201587	0.7307493E-05	2.641597
05202011	04	0.052	0.016	0.017	0.002	0.002	0.002	0.005	0.018	0.020	0.009	0.027	286.978	0.831	0.4301425	3.308452	0.6064120E-05	2.736857
05202011	05	0.071	0.015	0.015	0.002	0.002	0.002	0.005	0.019	0.019	0.010	0.027	286.922	0.835	0.5366000	3.650097	0.4305217E-05	2.928309
05202011	06	0.101	0.018	0.012	0.003	0.002	0.003	0.006	0.022	0.017	0.014	0.027	286.936	0.844	0.6140417	3.424836	0.2238446E-05	3.184693
05202011	07	0.116	0.020	0.018	0.003	0.002	0.004	0.007	0.027	0.016	0.014	0.027	288.282	0.849	0.3987970	1.982572	0.3068944E-05	2.810240
05202011	08	0.094	0.019	0.027	0.002	0.002	0.005	0.008	0.030	0.010	0.009	0.027	292.091	0.731	0.1225471E-03	0.2957044E-03	0.5237383E-09	2.751744
05202011	09	0.057	0.016	0.042	0.001	0.002	0.002	0.005	0.017	0.015	0.005	0.026	294.996	0.615	0.3232574E-01	0.9464179	0.6704593E-05	2.149710
05202011	10	0.043	0.037	0.077	0.000	0.001	0.002	0.004	0.013	0.028	0.004	0.029	297.361	0.521	NaN	2.298759	0.2988346E-01	-1.113937
05202011	11	0.028	0.069	0.110	0.000	0.001	0.001	0.003	0.011	0.045	0.003	0.036	299.441	0.451	NaN	1.878156	0.8339955E-01	-1.647432
05202011	12	0.015	0.078	0.107	0.000	0.001	0.001	0.003	0.010	0.059	0.001	0.042	301.168	0.404	NaN	1.725084	0.9176694E-01	-1.725876
05202011	13	0.006	0.083	0.100	0.000	0.001	0.001	0.003	0.010	0.069	0.000	0.047	302.905	0.362	0.5786657E-02	2.133256	0.6914941E-02	-0.5107454
05202011	14	0.006	0.084	0.096	0.000	0.001	0.001	0.003	0.009	0.068	0.000	0.048	303.876	0.339	0.4320621E-02	1.677429	0.6526366E-02	-0.5900272
05202011	15	0.006	0.074	0.082	0.000	0.001	0.001	0.003	0.008	0.063	0.001	0.045	303.874	0.332	0.4060566E-02	1.467800	0.6136072E-02	-0.6212236
05202011	16	0.007	0.065	0.075	0.000	0.001	0.001	0.003	0.008	0.062	0.001	0.043	302.298	0.344	0.5728245E-02	1.754828	0.6175608E-02	-0.5464451
05202011	17	0.021	0.066	0.077	0.000	0.002	0.002	0.004	0.011	0.060	0.001	0.045	301.830	0.361	NaN	1.682156	0.5336823E-01	-1.501416
05202011	18	0.039	0.071	0.073	0.000	0.002	0.002	0.005	0.015	0.052	0.001	0.046	301.416	0.372	NaN	1.767236	0.3004107E-01	-1.230421
05202011	19	0.070	0.073	0.067	0.000	0.002	0.003	0.006	0.022	0.034	0.001	0.046	299.737	0.423	NaN	2.209299	0.3654575E-03	0.7814176
05202011	20	0.126	0.081	0.078	0.000	0.002	0.004	0.008	0.031	0.015	0.002	0.046	297.318	0.435	NaN	2.134008	0.6322924E-05	2.528278
05202011	21	0.142	0.084	0.079	0.000	0.003	0.004	0.008	0.032	0.012	0.003	0.045	295.294	0.462	NaN	2.281989	0.3937982E-05	2.763040
05202011	22	0.149	0.077	0.076	0.000	0.003	0.004	0.009	0.034	0.009	0.005	0.045	293.586	0.518	NaN	2.799717	0.3522816E-05	2.900224
05202011	23	0.144	0.061	0.065	0.001	0.003	0.004	0.009	0.034	0.009	0.008	0.044	292.332	0.580	0.1832749	1.362384	0.9980208E-06	3.135160
05202011	24	0.137	0.043	0.052	0.001	0.002	0.004	0.009	0.030	0.014	0.009	0.041	291.362	0.642	0.2562777	1.867280	0.1682965E-05	3.045134
05212011	01	0.142	0.029	0.032	0.001	0.002	0.004	0.008	0.026	0.014	0.010	0.037	290.549	0.705	0.3728709	2.450077	0.2074852E-05	3.072192
05212011	02	0.148	0.020	0.017	0.001	0.002	0.003	0.008	0.024	0.012	0.009	0.033	289.991	0.750	0.4294461	2.212500	0.1349614E-05	3.214674
05212011	03	0.148	0.016	0.010	0.002	0.002	0.003	0.007	0.022	0.010	0.007	0.031	289.662	0.774	0.4557659	2.181755	0.1313429E-05	3.220399
05212011	04	0.143	0.015	0.007	0.002	0.002	0.003	0.007	0.020	0.010	0.005	0.029	289.443	0.792	0.4905730	2.220295	0.1214361E-05	3.262063
05212011	05	0.139	0.015	0.007	0.002	0.002	0.003	0.007	0.019	0.010	0.005	0.028	289.295	0.806	0.5243460	2.489414	0.1335044E-05	3.270602
05212011	06	0.142	0.016	0.006	0.002	0.002	0.003	0.007	0.020	0.009	0.005	0.028	289.301	0.817	0.5604401	2.432967	0.9525233E-06	3.407261
05212011	07	0.144	0.019	0.009	0.002	0.002	0.003	0.007	0.021	0.010	0.008	0.028	290.492	0.827	0.4990734	2.610529	0.1147488E-05	3.356980
05212011	08	0.124	0.019	0.020	0.001	0.002	0.004	0.008	0.024	0.007	0.007	0.029	294.453	0.738	0.1152778	0.8319809	0.5488540E-06	3.180657
05212011	09	0.079	0.014	0.032	0.001	0.002	0.003	0.007	0.018	0.014	0.004	0.029	297.113	0.630	0.3718287E-01	1.184656	0.4671521E-05	2.404134
05212011	10	0.066	0.021	0.050	0.000	0.002	0.002	0.005	0.013	0.025	0.003	0.029	299.502	0.535	NaN	2.611821	0.5942964E-04	1.642940
05212011	11	0.061	0.058	0.073	0.000	0.002	0.002	0.004	0.011	0.037	0.003	0.033	301.763	0.454	NaN	2.338670	0.7628399E-02	-0.5134644
05212011	12	0.044	0.090	0.082	0.000	0.002	0.002	0.004	0.010	0.048	0.002	0.037	303.352	0.411	NaN	2.003036	0.3062158E-01	-1.184339
05212011	13	0.029	0.102	0.078	0.000	0.002	0.001	0.003	0.009	0.054	0.001	0.040	304.943	0.372	NaN	1.639802	0.4800125E-01	-1.466461
05212011	14	0.022	0.103	0.070	0.000	0.002	0.001	0.003	0.008	0.055	0.001	0.039	305.807	0.352	NaN	1.462348	0.4668413E-01	-1.504119
05212011	15	0.019	0.099	0.061	0.000	0.002	0.001	0.003	0.007	0.051	0.001	0.036	305.680	0.352	NaN	1.356388	0.4059608E-01	-1.476100
05212011	16	0.020	0.093	0.053	0.000	0.001	0.001	0.003	0.007	0.046	0.001	0.033	305.121	0.362	NaN	1.275773	0.3091237E-01	-1.384359
05212011	17	0.022	0.087	0.046	0.000	0.001	0.001	0.002	0.007	0.044	0.001	0.032	304.150	0.377	NaN	1.362447	0.2249579E-01	-1.217782
05212011	18	0.033	0.085	0.038	0.000	0.002	0.001	0.003	0.008	0.041	0.001	0.032	302.946	0.397	NaN	1.560725	0.3954324E-02	-0.4037457
05212011	19	0.069	0.084	0.030	0.001	0.002	0.002	0.004	0.013	0.029	0.001	0.032	301.029	0.450	0.5513728E-02	1.111437	0.6982607E-04	1.201867
05212011	20	0.100	0.087	0.026	0.001	0.002	0.003	0.005	0.017	0.017	0.001	0.031	298.315	0.484	0.1730603E-01	0.9498315	0.1397566E-04	1.832274
05212011	21	0.102	0.090	0.021	0.001	0.002	0.003	0.005	0.017	0.015	0.001	0.030	296.465	0.522	0.3037608E-01	1.003358	0.9815020E-05	2.009565
05212011	22	0.099	0.090	0.016	0.001	0.002	0.002	0.005	0.015	0.015	0.001	0.028	295.100	0.565	0.4049623E-01	1.064377	0.1273897E-04	1.921961
05212011	23	0.096	0.089	0.015	0.001	0.002	0.002	0.004	0.014	0.016	0.001	0.027	293.993	0.612	0.6192774E-01	1.270597	0.1317948E-04	1.984110
05212011	24	0.096	0.089	0.014	0.001	0.002	0.002	0.004	0.014	0.016	0.002	0.026	293.040	0.667	0.9583545E-01	1.446867	0.9558101E-05	2.180057
05222011	01	0.094	0.093	0.014	0.001	0.002	0.002	0.004	0.014	0.018	0.002	0.026	292.184	0.731	0.1478004	1.816374	0.8567266E-05	2.326363
05222011	02	0.090	0.102	0.014	0.001	0.002	0.002	0.004	0.013	0.020	0.003	0.026	291.604	0.776	0.2080800	2.449328	0.9775671E-05	2.398901
05222011	03	0.086	0.113	0.014	0.001	0.002	0.002	0.004	0.013	0.021	0.003	0.026	291.297	0.796	0.2371081	2.723452	0.9817623E-05	2.443113
05222011	04	0.085	0.121	0.014	0.001	0.002	0.002	0.004	0.013	0.022	0.004	0.026	291.097	0.808	0.2606641	2.926321	0.9703506E-05	2.479393
05222011	05	0.090	0.128	0.015	0.001	0.002	0.002	0.004	0.014	0.022	0.004	0.027	290.948	0.819	0.2974539	3.191522	0.9170853E-05	2.541588
05222011	06	0.102	0.131	0.016	0.002	0.002	0.002	0.004	0.015	0.020	0.005	0.027	290.949	0.830	0.3420262	3.396148	0.7255096E-05	2.670343
05222011	07	0.117	0.130	0.019	0.002	0.002	0.002	0.005	0.018	0.018	0.009	0.027	292.196	0.838	0.3368899	3.267351	0.4190864E-05	2.891892
05222011	08	0.111	0.108	0.034	0.002	0.002	0.003	0.006	0.021	0.013	0.011	0.028	295.770	0.775	0.1491131	1.826987	0.1486438E-05	3.089589
05222011	09	0.054	0.100	0.046	0.001	0.002	0.002	0.004	0.014	0.020	0.004	0.027	298.955	0.676	0.1987034E-01	1.569915	0.2759625E-04	1.755026
05222011	10	0.024	0.135	0.057	0.001	0.002	0.001	0.003	0.009	0.031	0.002	0.028	301.010	0.579	0.5356491E-02	1.573403	0.1392198E-03	1.053139
05222011	11	0.005	0.168	0.055	0.001	0.002	0.001	0.002	0.006	0.038	0.001	0.028	302.663	0.518	0.1829863E-04	2.232217	0.5168886E-02	-0.3646606
05222011	12	0.005	0.130	0.045	0.001	0.002	0.001	0.002	0.005	0.034	0.001	0.025	304.312	0.467	0.1281500E-04	1.816813	0.5386657E-02	-0.4720090
05222011	13	0.007	0.098	0.034	0.001	0.002	0.001	0.002	0.005	0.028	0.001	0.021	305.865	0.421	0.2953708E-02	0.8569959	0.4045303E-04	1.326028
05222011	14	0.009	0.080	0.026	0.001	0.002	0.001	0.001	0.004	0.025	0.001	0.019	306.645	0.399	0.2927363E-02	0.7783980	0.3118324E-04	1.397280
05222011	15	0.007	0.061	0.021	0.001	0.001	0.001	0.001	0.004	0.026	0.001	0.019	306.283	0.400	0.3275096E-02	0.7599665	0.2866341E-04	1.423467
05222011	16	0.005	0.042	0.019	0.001	0.001	0.001	0.001	0.004	0.030	0.000	0.022	305.592	0.409	0.1257658E-04	1.226256	0.5117116E-02	-0.6204441
05222011	17	0.005	0.030	0.018	0.001	0.001	0.001	0.001	0.003	0.034	0.000	0.024	304.650	0.415	0.1448393E-04	1.213719	0.4765404E-02	-0.5939815
05222011	18	0.012	0.024	0.018	0.001	0.001	0.001	0.001	0.004	0.037	0.000	0.025	303.559	0.422	0.6449282E-02	1.112248	0.5827344E-04	1.280731
05222011	19	0.049	0.026	0.020	0.001	0.001	0.001	0.002	0.008	0.030	0.000	0.026	301.693	0.479	0.6724238E-02	1.122692	0.6571107E-04	1.232622
05222011	20	0.076	0.032	0.020	0.001	0.002	0.002	0.003	0.010	0.024	0.001	0.025	299.140	0.504	0.1051891E-01	1.051762	0.3790910E-04	1.443174
05222011	21	0.082	0.036	0.017	0.001	0.002	0.002	0.003	0.009	0.024	0.001	0.024	297.368	0.533	0.1923317E-01	1.148457	0.3000235E-04	1.582960
05222011	22	0.086	0.037	0.016	0.001	0.002	0.002	0.003	0.008	0.023	0.001	0.023	295.914	0.575	0.3372043E-01	1.293744	0.2565707E-04	1.702641
05222011	23	0.086	0.039	0.014	0.001	0.001	0.001	0.003	0.008	0.021	0.001	0.021	294.702	0.625	0.4360068E-01	1.269175	0.2283743E-04	1.744874
05222011	24	0.082	0.045	0.013	0.001	0.001	0.001	0.003	0.008	0.016	0.001	0.019	293.683	0.679	0.5664092E-01	1.277414	0.1602239E-04	1.901604
05232011	01	0.077	0.050	0.012	0.001	0.001	0.001	0.003	0.009	0.011	0.001	0.017	292.760	0.743	0.7112551E-01	1.177822	0.8161921E-05	2.159287
05232011	02	0.069	0.057	0.011	0.001	0.001	0.001	0.003	0.009	0.007	0.001	0.015	292.089	0.788	0.8506876E-01	1.114158	0.4486463E-05	2.395043
05232011	03	0.062	0.064	0.011	0.001	0.001	0.001	0.003	0.009	0.003	0.001	0.013	291.685	0.811	0.9657949E-01	0.8758245	0.1589684E-05	2.741106
05232011	04	0.065	0.070	0.011	0.001	0.001	0.001	0.003	0.010	0.002	0.001	0.012	291.422	0.822	0.9328657E-01	0.4964037	0.4162845E-06	3.076445
05232011	05	0.084	0.072	0.011	0.001	0.002	0.001	0.003	0.011	0.001	0.001	0.012	291.166	0.836	0.6496376E-01	0.3006078	0.1552565E-06	3.286950
05232011	06	0.117	0.072	0.011	0.001	0.002	0.002	0.004	0.014	0.000	0.001	0.013	291.175	0.834	0.7522106E-04	0.1161084E-03	0.2502896E-09	2.666421
05232011	07	0.143	0.075	0.016	0.001	0.002	0.003	0.005	0.017	0.002	0.003	0.013	292.368	0.848	0.1618779	0.5176249	0.4166383E-06	3.094256
05232011	08	0.117	0.076	0.030	0.001	0.002	0.004	0.005	0.019	0.003	0.006	0.014	296.071	0.726	0.6256962E-01	0.1955136	0.7355976E-07	3.424537
05232011	09	0.057	0.094	0.038	0.001	0.002	0.002	0.004	0.011	0.004	0.002	0.014	298.316	0.644	0.1567197E-01	0.2785900	0.4904399E-06	2.754380
05232011	10	0.023	0.105	0.046	0.000	0.002	0.001	0.002	0.006	0.013	0.001	0.015	300.315	0.582	NaN	1.558470	0.2089686E-01	-1.127383
05232011	11	0.014	0.089	0.056	0.000	0.001	0.001	0.002	0.005	0.018	0.001	0.016	302.326	0.512	NaN	1.105140	0.4126384E-01	-1.572152
05232011	12	0.010	0.059	0.049	0.000	0.001	0.001	0.001	0.004	0.020	0.001	0.016	303.859	0.461	NaN	0.9125402	0.3933428E-01	-1.634519
05232011	13	0.011	0.048	0.042	0.000	0.001	0.001	0.001	0.004	0.020	0.001	0.016	305.219	0.426	NaN	0.8370583	0.3084226E-01	-1.566390
05232011	14	0.013	0.047	0.039	0.000	0.001	0.001	0.001	0.004	0.021	0.000	0.016	305.876	0.411	NaN	0.8175184	0.2311726E-01	-1.451439
05232011	15	0.018	0.047	0.036	0.000	0.001	0.001	0.001	0.004	0.022	0.000	0.017	305.667	0.416	NaN	0.9543284	0.1513432E-01	-1.200265
05232011	16	0.022	0.045	0.030	0.000	0.001	0.001	0.001	0.004	0.022	0.000	0.017	305.029	0.427	NaN	1.047390	0.5317797E-02	-0.7056231
05232011	17	0.024	0.042	0.025	0.000	0.001	0.001	0.001	0.004	0.025	0.000	0.018	303.972	0.446	NaN	1.209536	0.8769123E-03	0.1396627
05232011	18	0.030	0.042	0.021	0.000	0.001	0.001	0.002	0.005	0.026	0.000	0.020	302.762	0.466	NaN	1.296336	0.1803474E-03	0.8566078
05232011	19	0.058	0.053	0.020	0.001	0.001	0.001	0.003	0.009	0.018	0.000	0.021	301.222	0.512	0.4703581E-02	0.8038329	0.3808084E-04	1.324459
05232011	20	0.084	0.061	0.017	0.001	0.002	0.002	0.004	0.015	0.005	0.001	0.022	299.176	0.541	0.1194143E-01	0.5794321	0.3187378E-05	2.259569
05232011	21	0.078	0.068	0.014	0.001	0.002	0.002	0.004	0.014	0.008	0.001	0.022	297.539	0.563	0.1631051E-01	0.6915703	0.5326823E-05	2.113368
05232011	22	0.070	0.069	0.013	0.001	0.002	0.001	0.003	0.013	0.011	0.001	0.022	296.289	0.593	0.1684850E-01	0.7940049	0.1647264E-04	1.683060
05232011	23	0.064	0.064	0.013	0.001	0.001	0.001	0.003	0.012	0.012	0.001	0.021	295.185	0.649	0.2373314E-01	0.9388846	0.1667248E-04	1.750612
05232011	24	0.060	0.056	0.013	0.001	0.001	0.001	0.003	0.012	0.012	0.001	0.021	294.245	0.706	0.3637010E-01	1.153416	0.1558367E-04	1.869316
05242011	01	0.057	0.046	0.013	0.001	0.001	0.001	0.003	0.012	0.011	0.001	0.020	293.471	0.762	0.4994369E-01	1.249063	0.1148562E-04	2.036430
05242011	02	0.052	0.040	0.013	0.001	0.001	0.001	0.003	0.012	0.010	0.001	0.020	292.976	0.801	0.6260324E-01	1.487859	0.1192999E-04	2.095922
05242011	03	0.051	0.043	0.014	0.001	0.001	0.001	0.003	0.012	0.009	0.001	0.019	292.749	0.816	0.7037306E-01	1.466807	0.8866616E-05	2.218615
05242011	04	0.061	0.048	0.015	0.001	0.001	0.001	0.004	0.013	0.007	0.002	0.019	292.596	0.824	0.9202713E-01	1.329876	0.4152284E-05	2.505524
05242011	05	0.085	0.053	0.016	0.001	0.002	0.001	0.004	0.015	0.005	0.003	0.019	292.463	0.832	0.1829485	1.264958	0.1065891E-05	3.074363
05242011	06	0.120	0.057	0.017	0.001	0.002	0.002	0.005	0.018	0.003	0.003	0.020	292.334	0.850	0.1446348	0.8409554	0.4708172E-06	3.251921
05242011	07	0.134	0.059	0.021	0.001	0.002	0.004	0.006	0.023	0.006	0.005	0.021	293.562	0.859	0.1288056E-03	0.5447352E-03	0.1437161E-08	2.578680
05242011	08	0.100	0.059	0.032	0.001	0.003	0.004	0.007	0.025	0.006	0.006	0.023	296.532	0.750	0.000000	0.2927944E-08	0.2395988E-18	7.087078
05242011	09	0.044	0.088	0.041	0.001	0.002	0.002	0.004	0.014	0.016	0.003	0.025	298.704	0.659	0.1388484E-01	1.252452	0.2322803E-04	1.731749
05242011	10	0.016	0.096	0.047	0.000	0.002	0.001	0.003	0.008	0.030	0.001	0.026	300.368	0.585	NaN	2.108448	0.2796771E-01	-1.122694
05242011	11	0.006	0.072	0.045	0.000	0.001	0.001	0.002	0.006	0.036	0.001	0.026	301.955	0.523	0.9335697E-02	2.350167	0.5422420E-02	-0.3630945
05242011	12	0.005	0.054	0.040	0.000	0.001	0.001	0.002	0.005	0.038	0.000	0.026	303.371	0.472	0.7831097E-02	1.975410	0.5628185E-02	-0.4547112
05242011	13	0.008	0.046	0.034	0.000	0.001	0.001	0.002	0.005	0.036	0.001	0.025	304.590	0.434	NaN	1.204516	0.2335546E-01	-1.287576
05242011	14	0.013	0.044	0.032	0.000	0.001	0.001	0.002	0.004	0.035	0.000	0.024	305.252	0.413	NaN	1.176138	0.1564895E-01	-1.124027
05242011	15	0.016	0.039	0.028	0.000	0.001	0.001	0.002	0.004	0.033	0.000	0.022	305.108	0.410	NaN	1.139939	0.6961541E-02	-0.7858236
05242011	16	0.017	0.034	0.025	0.000	0.001	0.001	0.001	0.004	0.032	0.000	0.022	304.610	0.416	NaN	1.187335	0.5597324E-02	-0.6734073
05242011	17	0.018	0.032	0.022	0.000	0.001	0.001	0.001	0.004	0.031	0.000	0.021	303.796	0.422	NaN	1.155648	0.2327460E-02	-0.3040567
05242011	18	0.025	0.032	0.020	0.000	0.001	0.001	0.002	0.005	0.027	0.000	0.020	302.884	0.434	NaN	1.098217	0.2392161E-03	0.6618976
05242011	19	0.052	0.036	0.019	0.001	0.001	0.001	0.003	0.010	0.016	0.000	0.020	301.464	0.476	0.3612816E-02	0.6148019	0.2590516E-04	1.375349
05242011	20	0.078	0.042	0.016	0.001	0.001	0.002	0.004	0.015	0.002	0.000	0.020	298.944	0.506	0.1807106E-01	0.3825280	0.4931869E-06	2.889652
05242011	21	0.078	0.050	0.015	0.001	0.001	0.002	0.004	0.015	0.003	0.001	0.020	296.986	0.551	0.2688175E-01	0.4368107	0.5238728E-06	2.921067
05242011	22	0.069	0.052	0.015	0.001	0.001	0.001	0.003	0.013	0.007	0.001	0.019	295.556	0.593	0.1466757E-01	0.5265923	0.6383728E-05	1.916400
05242011	23	0.064	0.053	0.015	0.001	0.001	0.001	0.003	0.012	0.009	0.001	0.019	294.518	0.632	0.2229220E-01	0.6960453	0.9254811E-05	1.876270
05242011	24	0.059	0.059	0.016	0.001	0.001	0.001	0.003	0.011	0.010	0.001	0.019	293.637	0.676	0.3358006E-01	0.9380978	0.1228472E-04	1.882883
05252011	01	0.056	0.067	0.017	0.000	0.001	0.001	0.003	0.011	0.010	0.001	0.019	292.794	0.728	NaN	2.256698	0.1523360E-04	2.170671
05252011	02	0.058	0.071	0.017	0.001	0.001	0.001	0.003	0.012	0.009	0.001	0.019	292.124	0.768	0.6891179E-01	1.193469	0.7669925E-05	2.192020
05252011	03	0.060	0.074	0.017	0.001	0.001	0.001	0.004	0.013	0.007	0.002	0.019	291.672	0.792	0.9232557E-01	1.172651	0.3950304E-05	2.472538
05252011	04	0.069	0.073	0.015	0.001	0.001	0.001	0.004	0.015	0.005	0.002	0.019	291.304	0.811	0.1400254	0.9999152	0.1111543E-05	2.954037
05252011	05	0.090	0.067	0.013	0.001	0.002	0.002	0.004	0.016	0.003	0.003	0.019	291.031	0.823	0.1755457	0.8888930	0.7482668E-06	3.074793
05252011	06	0.127	0.060	0.012	0.001	0.002	0.003	0.005	0.019	0.002	0.002	0.020	290.902	0.835	0.1009143	0.3887342	0.1808022E-06	3.332449
05252011	07	0.156	0.053	0.018	0.001	0.002	0.004	0.006	0.023	0.006	0.006	0.020	292.111	0.838	0.1433492E-03	0.4699171E-03	0.8532694E-09	2.740935
05252011	08	0.131	0.046	0.035	0.001	0.002	0.004	0.006	0.026	0.007	0.007	0.020	295.809	0.740	0.000000	0.4379244E-08	0.1000277E-13	2.641279
05252011	09	0.056	0.039	0.043	0.001	0.002	0.002	0.004	0.013	0.007	0.003	0.018	298.417	0.630	0.3049684E-01	0.6177521	0.7423640E-06	2.920197
05252011	10	0.022	0.047	0.051	0.000	0.001	0.001	0.002	0.007	0.016	0.001	0.017	300.728	0.541	NaN	1.369534	0.2738220E-01	-1.300895
05252011	11	0.012	0.049	0.059	0.000	0.001	0.001	0.002	0.005	0.022	0.001	0.018	302.671	0.475	NaN	1.074644	0.4636928E-01	-1.634966
05252011	12	0.009	0.038	0.053	0.000	0.001	0.001	0.001	0.004	0.025	0.001	0.019	304.369	0.425	NaN	0.9499614	0.4546816E-01	-1.680001
05252011	13	0.010	0.032	0.039	0.000	0.001	0.001	0.001	0.004	0.026	0.001	0.019	305.928	0.382	NaN	0.8195619	0.2865075E-01	-1.543554
05252011	14	0.013	0.032	0.031	0.001	0.001	0.001	0.001	0.004	0.027	0.000	0.019	306.696	0.363	0.2371371E-02	0.6697494	0.2929131E-04	1.359174
05252011	15	0.016	0.032	0.028	0.001	0.001	0.001	0.001	0.004	0.027	0.000	0.019	306.431	0.372	0.2624571E-02	0.6918034	0.2966797E-04	1.367695
05252011	16	0.019	0.033	0.027	0.001	0.001	0.001	0.002	0.004	0.028	0.000	0.020	305.834	0.386	0.3048241E-02	0.7643354	0.3257518E-04	1.370397
05252011	17	0.021	0.032	0.026	0.001	0.001	0.001	0.002	0.004	0.027	0.000	0.020	304.918	0.399	0.3407657E-02	0.7884090	0.3724975E-04	1.325628
05252011	18	0.033	0.032	0.023	0.001	0.001	0.001	0.002	0.006	0.024	0.000	0.020	303.960	0.411	0.3468692E-02	0.7150280	0.3419066E-04	1.320415
05252011	19	0.060	0.034	0.022	0.001	0.002	0.001	0.003	0.010	0.014	0.000	0.021	302.351	0.465	0.3477037E-02	0.6742449	0.2960351E-04	1.357474
05252011	20	0.078	0.037	0.016	0.001	0.002	0.002	0.004	0.015	0.003	0.001	0.021	299.744	0.510	0.1135981E-01	0.4645696	0.1446124E-05	2.506845
05252011	21	0.056	0.038	0.011	0.002	0.002	0.001	0.004	0.012	0.011	0.001	0.021	298.096	0.542	0.7132471E-02	0.6584533	0.1983930E-04	1.520999
05252011	22	0.040	0.041	0.010	0.002	0.002	0.001	0.003	0.009	0.019	0.001	0.021	297.059	0.575	0.9289145E-02	0.9780865	0.4896066E-04	1.300530
05252011	23	0.036	0.044	0.011	0.002	0.002	0.001	0.003	0.008	0.025	0.001	0.023	296.384	0.605	0.1391846E-01	1.366154	0.7529956E-04	1.258707
05252011	24	0.036	0.040	0.009	0.004	0.002	0.001	0.003	0.008	0.029	0.001	0.025	297.882	0.557	0.1297724E-01	1.331785	0.7137652E-04	1.270879
05262011	01	0.033	0.033	0.007	0.006	0.002	0.001	0.003	0.007	0.029	0.001	0.025	297.317	0.579	0.1595759E-01	1.492497	0.7488547E-04	1.299516
05262011	02	0.022	0.029	0.008	0.006	0.002	0.001	0.002	0.006	0.031	0.001	0.025	296.644	0.619	0.1875865E-01	1.790225	0.1016751E-03	1.245693
05262011	03	0.018	0.027	0.007	0.005	0.002	0.001	0.002	0.006	0.030	0.001	0.024	295.978	0.659	0.2137721E-01	1.913762	0.9914982E-04	1.285596
05262011	04	0.021	0.030	0.008	0.005	0.002	0.001	0.002	0.006	0.028	0.001	0.023	295.425	0.689	0.2111244E-01	1.988620	0.1058882E-03	1.273704
05262011	05	0.032	0.038	0.009	0.004	0.002	0.001	0.003	0.008	0.025	0.001	0.023	294.928	0.726	0.2941751E-01	2.009504	0.6525921E-04	1.488447
05262011	06	0.049	0.049	0.011	0.004	0.002	0.002	0.003	0.011	0.018	0.001	0.024	294.547	0.762	0.5356926E-01	2.041532	0.2618726E-04	1.891866
05262011	07	0.060	0.057	0.015	0.004	0.003	0.003	0.004	0.014	0.010	0.002	0.024	295.086	0.776	0.8119088E-01	1.865088	0.7039617E-05	2.423150
05262011	08	0.047	0.056	0.022	0.003	0.002	0.002	0.004	0.012	0.010	0.002	0.022	297.150	0.714	0.2040207E-01	1.338534	0.1662328E-04	1.905913
05262011	09	0.021	0.047	0.030	0.001	0.001	0.001	0.002	0.007	0.018	0.001	0.018	298.584	0.684	0.6443441E-02	1.253402	0.8027236E-04	1.193524
05262011	10	0.010	0.033	0.039	0.000	0.001	0.001	0.001	0.004	0.022	0.001	0.017	300.279	0.632	NaN	1.686284	0.2816212E-01	-1.222735
05262011	11	0.006	0.025	0.044	0.000	0.001	0.001	0.001	0.004	0.022	0.001	0.016	301.799	0.588	NaN	1.330566	0.3597124E-01	-1.431919
05262011	12	0.005	0.014	0.039	0.000	0.001	0.000	0.001	0.003	0.021	0.000	0.014	298.874	0.715	NaN	1.751190	0.3191948E-01	-1.260722
05262011	13	0.006	0.007	0.036	0.001	0.001	0.000	0.001	0.001	0.020	0.000	0.012	299.385	0.681	0.5651176E-02	1.204392	0.9737018E-04	1.092342
05262011	14	0.014	0.008	0.039	0.001	0.001	0.001	0.000	0.001	0.020	0.000	0.012	300.651	0.633	0.4654348E-02	1.114193	0.7835236E-04	1.152908
05262011	15	0.024	0.012	0.052	0.001	0.001	0.001	0.000	0.001	0.020	0.000	0.012	299.762	0.650	0.4426897E-02	1.177647	0.1013855E-03	1.065039
05262011	16	0.027	0.015	0.053	0.001	0.001	0.001	0.000	0.001	0.016	0.000	0.010	298.234	0.689	0.5935907E-02	1.105561	0.7281082E-04	1.181387
05262011	17	0.028	0.015	0.047	0.001	0.001	0.001	0.000	0.001	0.014	0.001	0.009	296.571	0.742	0.1009768E-01	1.174421	0.4977803E-04	1.372786
05262011	18	0.030	0.017	0.043	0.001	0.001	0.001	0.000	0.001	0.014	0.001	0.009	294.829	0.798	0.2232713E-01	1.522716	0.3750817E-04	1.608493
05262011	19	0.036	0.018	0.040	0.000	0.001	0.001	0.000	0.001	0.015	0.002	0.009	293.071	0.862	NaN	7.887640	0.2677208E-02	0.4692650
05262011	20	0.039	0.019	0.035	0.000	0.001	0.001	0.000	0.001	0.018	0.005	0.009	291.733	0.913	NaN	13.73186	0.4502274E-03	1.484298
05262011	21	0.039	0.024	0.027	0.001	0.001	0.001	0.001	0.001	0.031	0.018	0.009	291.027	0.940	0.5086815	14.66135	0.4429972E-04	2.519773
05262011	22	0.035	0.030	0.020	0.002	0.001	0.001	0.001	0.001	0.048	0.034	0.009	290.646	0.957	0.7423643	35.73278	0.1032529E-03	2.539165
05262011	23	0.029	0.038	0.023	0.002	0.001	0.001	0.001	0.001	0.056	0.038	0.011	290.578	0.956	0.7227194	40.13937	0.1418437E-03	2.451761
05262011	24	0.024	0.045	0.025	0.002	0.001	0.001	0.001	0.001	0.052	0.029	0.013	290.613	0.954	0.5881152	25.73729	0.1008732E-03	2.406787
05272011	01	0.020	0.048	0.023	0.001	0.001	0.001	0.001	0.001	0.043	0.016	0.015	290.615	0.962	0.5469049	26.68975	0.1185382E-03	2.352486
05272011	02	0.016	0.043	0.018	0.001	0.001	0.000	0.001	0.001	0.034	0.007	0.015	290.925	0.961	0.3749199	18.35140	0.1082916E-03	2.229074
05272011	03	0.016	0.038	0.015	0.001	0.001	0.000	0.001	0.001	0.027	0.004	0.013	291.181	0.962	0.3104435	14.21648	0.8435311E-04	2.226691
05272011	04	0.025	0.037	0.013	0.001	0.001	0.000	0.001	0.001	0.024	0.005	0.011	291.068	0.968	0.5391256	21.16948	0.6651480E-04	2.502792
05272011	05	0.047	0.039	0.010	0.002	0.001	0.001	0.001	0.001	0.027	0.010	0.010	290.936	0.976	0.8687947	43.51793	0.5046672E-04	2.935663
05272011	06	0.090	0.044	0.006	0.003	0.001	0.001	0.001	0.001	0.032	0.017	0.009	290.966	0.981	0.9407888	49.97277	0.2916233E-04	3.233911
05272011	07	0.118	0.052	0.006	0.004	0.001	0.002	0.001	0.001	0.041	0.028	0.009	292.422	0.973	0.9138987	42.06517	0.2909417E-04	3.160117
05272011	08	0.017	0.050	0.014	0.000	0.000	0.001	0.000	0.001	0.029	0.004	0.015	293.873	0.907	NaN	9.591146	0.5995260E-03	1.204062
05272011	09	0.001	0.020	0.019	0.000	0.000	0.000	0.000	0.001	0.028	0.000	0.022	294.795	0.849	0.1784742E-02	4.519692	0.4363748E-02	0.1524922E-01
05272011	10	0.002	0.018	0.036	0.000	0.000	0.000	0.000	0.001	0.032	0.000	0.022	296.084	0.808	0.2045929E-02	3.574866	0.4236558E-02	-0.7375345E-01
05272011	11	0.001	0.018	0.053	0.000	0.000	0.000	0.000	0.001	0.024	0.000	0.019	297.189	0.758	0.3959537E-03	2.412810	0.3560042E-02	-0.1689321
05272011	12	0.001	0.016	0.055	0.000	0.000	0.000	0.000	0.001	0.023	0.000	0.018	297.935	0.721	0.2319217E-03	1.909331	0.3506992E-02	-0.2640535
05272011	13	0.001	0.016	0.058	0.000	0.000	0.000	0.000	0.001	0.024	0.000	0.017	298.845	0.683	0.2445579E-03	1.536847	0.4165144E-02	-0.4329995
05272011	14	0.003	0.016	0.059	0.000	0.000	0.000	0.000	0.001	0.030	0.000	0.018	299.320	0.660	0.3347874E-02	1.712677	0.3574397E-02	-0.3195272
05272011	15	0.015	0.016	0.066	0.000	0.000	0.001	0.000	0.001	0.033	0.001	0.018	299.451	0.643	NaN	2.383833	0.4929847E-01	-1.315558
05272011	16	0.024	0.015	0.074	0.000	0.000	0.001	0.000	0.001	0.034	0.001	0.019	299.388	0.629	NaN	2.723437	0.4869495E-01	-1.252367
05272011	17	0.034	0.016	0.084	0.000	0.001	0.001	0.001	0.001	0.034	0.001	0.019	299.266	0.609	NaN	2.983446	0.4604966E-01	-1.188508
05272011	18	0.042	0.017	0.092	0.000	0.001	0.001	0.001	0.001	0.032	0.001	0.019	298.820	0.593	NaN	2.977590	0.4845764E-01	-1.211497
05272011	19	0.059	0.021	0.084	0.000	0.001	0.001	0.001	0.001	0.031	0.002	0.018	297.854	0.648	NaN	4.420357	0.2101345E-01	-0.6770400
05272011	20	0.067	0.030	0.061	0.001	0.001	0.001	0.001	0.002	0.030	0.002	0.018	296.025	0.665	0.3692764E-01	1.869503	0.4677547E-04	1.601708
05272011	21	0.052	0.036	0.041	0.000	0.001	0.001	0.001	0.002	0.029	0.001	0.018	294.590	0.691	NaN	4.114213	0.1397510E-03	1.468932
05272011	22	0.050	0.036	0.032	0.001	0.001	0.001	0.001	0.002	0.028	0.001	0.017	293.561	0.729	0.5905318E-01	2.128311	0.4503088E-04	1.674525
05272011	23	0.054	0.035	0.026	0.001	0.001	0.001	0.001	0.002	0.026	0.002	0.016	292.773	0.771	0.8675402E-01	2.362743	0.3383275E-04	1.844079
05272011	24	0.056	0.033	0.022	0.001	0.001	0.001	0.001	0.003	0.024	0.002	0.015	292.129	0.817	0.1264363	2.659091	0.2280380E-04	2.066726
05282011	01	0.051	0.032	0.018	0.001	0.001	0.001	0.001	0.003	0.023	0.003	0.015	291.547	0.866	0.1865386	3.778660	0.2313261E-04	2.213113
05282011	02	0.048	0.031	0.016	0.001	0.001	0.001	0.001	0.003	0.024	0.004	0.015	291.128	0.901	0.2638806	5.236234	0.2345581E-04	2.348769
05282011	03	0.047	0.030	0.014	0.001	0.001	0.001	0.002	0.003	0.026	0.005	0.015	290.879	0.918	0.3691679	7.153991	0.2219475E-04	2.508298
05282011	04	0.052	0.031	0.013	0.002	0.001	0.001	0.002	0.002	0.029	0.008	0.014	290.702	0.931	0.4887065	9.659100	0.2233588E-04	2.635933
05282011	05	0.062	0.033	0.011	0.002	0.001	0.001	0.002	0.002	0.035	0.014	0.014	290.593	0.939	0.6508555	14.24255	0.2335021E-04	2.785297
05282011	06	0.078	0.037	0.008	0.004	0.001	0.001	0.002	0.002	0.043	0.021	0.014	290.615	0.948	0.8001555	22.33605	0.2552707E-04	2.942005
05282011	07	0.089	0.043	0.007	0.005	0.001	0.001	0.002	0.002	0.061	0.038	0.014	291.921	0.955	0.8774850	40.97196	0.4277951E-04	2.981251
05282011	08	0.077	0.042	0.024	0.004	0.001	0.001	0.002	0.002	0.079	0.055	0.015	293.831	0.885	0.4982141	12.75184	0.2741114E-04	2.667646
05282011	09	0.059	0.049	0.082	0.001	0.001	0.001	0.002	0.003	0.046	0.022	0.017	295.699	0.808	0.1021821	3.683248	0.2614426E-04	2.148855
05282011	10	0.041	0.078	0.117	0.000	0.001	0.001	0.002	0.004	0.041	0.007	0.023	297.868	0.693	NaN	4.828746	0.7144120E-01	-1.170114
05282011	11	0.012	0.109	0.123	0.000	0.001	0.001	0.002	0.004	0.052	0.002	0.031	300.036	0.585	NaN	2.794954	0.1092427	-1.592018
05282011	12	0.004	0.099	0.115	0.000	0.001	0.001	0.001	0.003	0.048	0.000	0.031	301.506	0.529	0.5198896E-02	2.019418	0.4921017E-02	-0.3868288
05282011	13	0.005	0.080	0.105	0.000	0.001	0.001	0.001	0.003	0.044	0.000	0.028	302.802	0.485	0.5037904E-02	1.990563	0.5466046E-02	-0.4386975
05282011	14	0.005	0.069	0.098	0.000	0.001	0.001	0.001	0.003	0.043	0.000	0.027	303.580	0.457	0.4742265E-02	1.882064	0.5717831E-02	-0.4825969
05282011	15	0.005	0.066	0.097	0.000	0.001	0.001	0.001	0.004	0.045	0.001	0.028	303.498	0.452	NaN	1.482376	0.9182252E-01	-1.791991
05282011	16	0.008	0.062	0.096	0.000	0.001	0.001	0.001	0.004	0.045	0.001	0.028	303.073	0.455	NaN	1.582296	0.8765381E-01	-1.743483
05282011	17	0.012	0.055	0.092	0.000	0.001	0.001	0.002	0.004	0.042	0.001	0.027	302.375	0.462	NaN	1.574101	0.7949872E-01	-1.703328
05282011	18	0.017	0.049	0.088	0.000	0.001	0.001	0.002	0.005	0.039	0.001	0.026	301.518	0.471	NaN	1.621261	0.6924562E-01	-1.630540
05282011	19	0.033	0.049	0.081	0.000	0.001	0.001	0.002	0.007	0.035	0.001	0.026	300.304	0.487	NaN	1.944289	0.4499836E-01	-1.364436
05282011	20	0.074	0.055	0.074	0.000	0.001	0.002	0.003	0.012	0.023	0.001	0.027	298.312	0.522	NaN	2.876383	0.6304446E-03	0.6591998
05282011	21	0.101	0.060	0.084	0.000	0.002	0.002	0.004	0.015	0.017	0.002	0.027	296.836	0.555	NaN	3.513210	0.3706410E-04	1.976751
05282011	22	0.106	0.059	0.097	0.000	0.002	0.002	0.005	0.016	0.015	0.003	0.027	295.680	0.600	NaN	4.534665	0.7458938E-04	1.783868
05282011	23	0.099	0.052	0.101	0.000	0.002	0.003	0.005	0.016	0.014	0.005	0.026	294.734	0.655	NaN	6.047718	0.7681690E-03	0.8961347
05282011	24	0.091	0.043	0.093	0.000	0.002	0.003	0.005	0.017	0.011	0.006	0.024	293.941	0.713	NaN	6.827928	0.4275301E-03	1.203322
05292011	01	0.079	0.034	0.074	0.000	0.001	0.003	0.005	0.017	0.007	0.007	0.022	293.207	0.777	NaN	7.895528	0.2774086E-03	1.454261
05292011	02	0.069	0.026	0.054	0.000	0.001	0.003	0.005	0.018	0.005	0.005	0.020	292.786	0.819	NaN	7.075920	0.1065204E-03	1.822350
05292011	03	0.062	0.021	0.035	0.001	0.001	0.003	0.005	0.018	0.002	0.002	0.018	292.594	0.842	0.2871156E-03	0.1439865E-02	0.7041890E-08	2.310633
05292011	04	0.061	0.019	0.020	0.001	0.001	0.002	0.005	0.017	0.001	0.001	0.017	292.515	0.853	0.000000	0.1954350E-08	0.1456675E-18	7.127640
05292011	05	0.063	0.020	0.012	0.001	0.002	0.002	0.005	0.017	0.001	0.001	0.017	292.604	0.853	0.000000	0.2001389E-08	0.1497070E-18	7.126090
05292011	06	0.067	0.023	0.008	0.001	0.002	0.002	0.006	0.017	0.001	0.001	0.017	292.588	0.882	0.000000	0.2060366E-08	0.1000350E-13	2.313792
05292011	07	0.069	0.026	0.011	0.001	0.002	0.003	0.006	0.018	0.001	0.001	0.017	294.239	0.864	0.000000	0.1751789E-08	0.1407304E-18	7.095094
05292011	08	0.057	0.026	0.017	0.002	0.002	0.003	0.006	0.018	0.001	0.001	0.016	296.828	0.788	0.000000	0.1310916E-08	0.1112144E-18	7.071414
05292011	09	0.036	0.026	0.023	0.001	0.002	0.001	0.004	0.010	0.001	0.002	0.012	299.037	0.700	0.8696914E-02	0.1892421	0.1033106E-06	3.262873
05292011	10	0.034	0.042	0.033	0.001	0.002	0.001	0.003	0.008	0.004	0.001	0.012	301.139	0.618	0.5211234E-02	0.4132909	0.2160499E-05	2.281702
05292011	11	0.031	0.059	0.037	0.000	0.001	0.001	0.002	0.006	0.013	0.001	0.015	303.248	0.538	NaN	1.505447	0.4437357E-02	-0.4694591
05292011	12	0.035	0.042	0.036	0.000	0.001	0.001	0.002	0.005	0.013	0.001	0.014	304.837	0.478	NaN	1.252011	0.1096101E-02	0.5775762E-01
05292011	13	0.037	0.032	0.035	0.000	0.001	0.001	0.002	0.005	0.012	0.001	0.013	306.134	0.437	NaN	1.013895	0.1592114E-03	0.8040189
05292011	14	0.034	0.028	0.035	0.000	0.001	0.001	0.002	0.004	0.012	0.001	0.013	306.739	0.422	NaN	0.9342950	0.1358220E-02	-0.1624862
05292011	15	0.028	0.024	0.034	0.000	0.001	0.001	0.002	0.004	0.015	0.001	0.014	306.641	0.423	NaN	0.9187986	0.4015780E-02	-0.6405495
05292011	16	0.024	0.020	0.033	0.000	0.001	0.001	0.002	0.005	0.018	0.001	0.016	306.158	0.435	NaN	1.009083	0.5777605E-02	-0.7578211
05292011	17	0.026	0.018	0.031	0.000	0.001	0.001	0.002	0.005	0.019	0.001	0.017	305.356	0.453	NaN	1.120581	0.3470839E-02	-0.4909912
05292011	18	0.039	0.019	0.031	0.000	0.001	0.001	0.002	0.006	0.015	0.000	0.016	304.466	0.473	NaN	1.190948	0.8637368E-04	1.139511
05292011	19	0.080	0.027	0.033	0.000	0.002	0.002	0.004	0.012	0.003	0.001	0.016	302.868	0.532	NaN	1.151935	0.4368570E-05	2.421089
05292011	20	0.105	0.036	0.033	0.000	0.002	0.003	0.006	0.018	0.000	0.001	0.016	298.312	0.522	NaN	0.8230116	0.1386617E-05	2.773449
05292011	21	0.117	0.042	0.036	0.000	0.002	0.003	0.006	0.020	0.000	0.001	0.016	296.836	0.555	NaN	1.086265	0.1795090E-05	2.781850
05292011	22	0.120	0.043	0.038	0.000	0.002	0.003	0.006	0.020	0.000	0.001	0.016	295.680	0.600	NaN	1.378004	0.2476375E-05	2.745434
05292011	23	0.117	0.042	0.037	0.000	0.002	0.003	0.006	0.020	0.001	0.001	0.016	294.734	0.655	NaN	1.769724	0.4017055E-05	2.643998
05292011	24	0.110	0.039	0.032	0.000	0.002	0.003	0.006	0.020	0.001	0.001	0.016	293.941	0.713	NaN	1.956978	0.5356779E-05	2.562682
05302011	01	0.100	0.035	0.024	0.001	0.002	0.003	0.006	0.021	0.002	0.004	0.016	293.207	0.777	0.000000	0.3766630E-08	0.1000001E-13	2.575953
05302011	02	0.090	0.031	0.018	0.001	0.002	0.003	0.007	0.021	0.002	0.004	0.016	292.786	0.819	0.1113046	0.3402545	0.2329130E-06	3.164610
05302011	03	0.084	0.026	0.013	0.001	0.002	0.003	0.007	0.021	0.002	0.004	0.015	292.594	0.842	NaN	3.228691	0.2398526E-09	7.129082
05302011	04	0.082	0.021	0.009	0.001	0.002	0.003	0.006	0.021	0.001	0.003	0.015	292.515	0.853	NaN	2.196191	0.1636932E-09	7.127639
05302011	05	0.079	0.018	0.007	0.001	0.002	0.003	0.006	0.020	0.001	0.003	0.015	292.604	0.853	0.2123944	0.3834912	0.1484491E-06	3.412178
05302011	06	0.077	0.018	0.004	0.003	0.002	0.003	0.006	0.019	0.001	0.004	0.014	292.588	0.882	0.2500000	0.5270341	0.2846972E-06	3.267456
05302011	07	0.074	0.020	0.000	0.006	0.002	0.003	0.007	0.019	0.001	0.013	0.013	294.239	0.864	NaN	3.867021	0.3106581E-09	7.095094
05302011	08	0.056	0.021	0.000	0.007	0.002	0.003	0.007	0.019	0.004	0.027	0.011	296.828	0.788	NaN	4.714446	0.3775161E-05	3.096495
05302011	09	0.033	0.022	0.017	0.003	0.002	0.002	0.004	0.010	0.005	0.011	0.008	299.037	0.700	0.7142854E-01	0.1597894	0.3175026E-07	3.701801
05302011	10	0.033	0.037	0.032	0.001	0.002	0.001	0.003	0.008	0.002	0.002	0.009	301.139	0.618	0.1748621E-02	0.5381692E-01	0.2168845E-07	3.394690
05302011	11	0.025	0.051	0.036	0.000	0.001	0.001	0.002	0.006	0.008	0.001	0.012	303.248	0.538	NaN	1.159782	0.8656334E-02	-0.8729576
05302011	12	0.023	0.033	0.034	0.000	0.001	0.001	0.002	0.004	0.007	0.000	0.010	304.837	0.478	NaN	0.8453267	0.8667000E-02	-1.010844
05302011	13	0.020	0.023	0.032	0.000	0.001	0.001	0.002	0.004	0.010	0.000	0.010	306.134	0.437	NaN	0.7101506	0.6506083E-02	-0.9619691
05302011	14	0.015	0.020	0.032	0.000	0.001	0.001	0.001	0.004	0.016	0.000	0.013	306.739	0.422	NaN	0.7378674	0.1244800E-01	-1.227121
05302011	15	0.010	0.017	0.032	0.000	0.001	0.001	0.001	0.004	0.023	0.000	0.017	306.641	0.423	NaN	0.8575665	0.1857580E-01	-1.335680
05302011	16	0.009	0.015	0.030	0.000	0.001	0.001	0.002	0.004	0.026	0.000	0.019	306.158	0.435	NaN	0.9910980	0.1711689E-01	-1.237308
05302011	17	0.012	0.014	0.029	0.000	0.001	0.001	0.002	0.004	0.027	0.000	0.019	305.356	0.453	NaN	1.091012	0.1180094E-01	-1.034087
05302011	18	0.027	0.015	0.028	0.000	0.001	0.001	0.002	0.006	0.023	0.000	0.019	304.466	0.473	NaN	1.289991	0.5519766E-03	0.3686659
05302011	19	0.076	0.023	0.033	0.000	0.001	0.002	0.004	0.012	0.007	0.001	0.019	302.868	0.532	NaN	1.403418	0.8385628E-05	2.223651
05302011	20	0.105	0.029	0.027	0.000	0.002	0.003	0.005	0.017	0.000	0.001	0.017	300.199	0.569	NaN	0.8614621	0.2484241E-05	2.540042
05302011	21	0.113	0.031	0.019	0.001	0.002	0.003	0.005	0.018	0.000	0.001	0.017	298.497	0.609	0.000000	0.5298442E-08	0.4155443E-18	7.105531
05302011	22	0.103	0.030	0.014	0.001	0.002	0.002	0.005	0.016	0.000	0.001	0.016	297.165	0.658	0.000000	0.4086997E-08	0.1000673E-13	2.611112
05302011	23	0.094	0.027	0.011	0.001	0.001	0.002	0.005	0.015	0.001	0.001	0.016	296.184	0.700	0.1460236E-01	0.9913171E-01	0.2716963E-07	3.562129
05302011	24	0.081	0.024	0.009	0.001	0.001	0.002	0.004	0.014	0.001	0.001	0.016	295.235	0.753	0.4143178E-01	0.2664230	0.8590122E-07	3.491572
