# Supplementary material for: Understanding nitrate formation in a world with less sulfate
Source: Copernicus journal article supplement (doi:10.5194/acp-18-12765-2018), 2018-09-05
Supplement: Supplementary file 2 [file acp-18-12765-2018-supplement.zip › DATA/RAW DATA FOR DIURNALS/data_extract_JST_nov_mod.csv]

Date	Hour	NH3	SO2	HNO3	CL	NA	MG	K	CA	NH4	NO3	SO4	T	RH	e_NO3	Water	H+	pH
11022011	01	0.010	0.054	0.035	0.002	0.002	0.003	0.008	0.023	0.056	0.038	0.040	280.062	0.764	0.5198052	5.568811	0.3546509E-04	2.195961
11022011	02	0.007	0.053	0.038	0.002	0.002	0.002	0.008	0.022	0.059	0.037	0.040	279.624	0.789	0.4919920	6.487023	0.5996402E-04	2.034155
11022011	03	0.006	0.053	0.034	0.002	0.002	0.002	0.008	0.021	0.061	0.038	0.039	279.166	0.811	0.5335275	7.435218	0.6735842E-04	2.042902
11022011	04	0.006	0.055	0.028	0.002	0.002	0.002	0.008	0.022	0.065	0.043	0.039	278.808	0.825	0.6179403	8.938863	0.6528921E-04	2.136441
11022011	05	0.010	0.058	0.017	0.003	0.002	0.003	0.008	0.023	0.073	0.054	0.038	278.508	0.837	0.7909910	11.05718	0.3851041E-04	2.458066
11022011	06	0.023	0.063	0.007	0.004	0.002	0.003	0.009	0.025	0.079	0.065	0.038	278.247	0.846	0.9131706	13.18095	0.1888452E-04	2.843841
11022011	07	0.038	0.070	0.004	0.005	0.002	0.005	0.009	0.028	0.079	0.073	0.039	278.043	0.853	0.9512560	14.14515	0.1134538E-04	3.095789
11022011	08	0.035	0.073	0.005	0.005	0.003	0.005	0.010	0.031	0.084	0.080	0.039	278.593	0.815	0.9256029	11.22906	0.1046689E-04	3.030526
11022011	09	0.019	0.072	0.022	0.003	0.003	0.005	0.010	0.030	0.092	0.088	0.039	281.308	0.699	0.7367857	5.806115	0.7422884E-05	2.893313
11022011	10	0.015	0.080	0.058	0.001	0.002	0.003	0.008	0.021	0.081	0.061	0.039	284.656	0.578	0.3709891	2.941008	0.1080549E-04	2.434852
11022011	11	0.022	0.094	0.086	0.001	0.002	0.002	0.007	0.016	0.070	0.035	0.040	287.613	0.475	0.1473854	1.801496	0.2885732E-04	1.795377
11022011	12	0.027	0.094	0.110	0.000	0.001	0.002	0.005	0.012	0.059	0.010	0.042	289.515	0.417	NaN	2.035536	0.8387690E-01	-1.614964
11022011	13	0.027	0.080	0.107	0.000	0.001	0.002	0.005	0.010	0.056	0.005	0.041	291.244	0.369	NaN	1.660595	0.8096364E-01	-1.688026
11022011	14	0.029	0.072	0.101	0.000	0.001	0.001	0.004	0.010	0.056	0.003	0.040	291.982	0.353	NaN	1.472551	0.7197622E-01	-1.689119
11022011	15	0.033	0.070	0.088	0.000	0.001	0.001	0.004	0.009	0.058	0.003	0.041	291.492	0.365	NaN	1.706161	0.5681339E-01	-1.522431
11022011	16	0.039	0.070	0.074	0.000	0.001	0.001	0.004	0.009	0.059	0.004	0.041	290.415	0.390	NaN	1.929388	0.3634787E-01	-1.275059
11022011	17	0.047	0.070	0.058	0.000	0.001	0.002	0.004	0.010	0.060	0.005	0.041	288.775	0.426	NaN	2.451903	0.7969585E-02	-0.5119324
11022011	18	0.063	0.073	0.039	0.001	0.001	0.002	0.005	0.013	0.055	0.007	0.042	286.992	0.466	0.2338713	1.928513	0.3402510E-04	1.753423
11022011	19	0.085	0.084	0.028	0.001	0.002	0.002	0.007	0.020	0.042	0.009	0.042	285.344	0.520	0.4029638	1.863271	0.1045164E-04	2.251092
11022011	20	0.076	0.089	0.018	0.001	0.002	0.003	0.008	0.024	0.044	0.020	0.043	284.101	0.567	0.5278670	2.175029	0.5823979E-05	2.572245
11022011	21	0.070	0.092	0.017	0.001	0.002	0.003	0.009	0.027	0.043	0.026	0.043	283.148	0.601	0.6032436	2.350630	0.3722416E-05	2.800359
11022011	22	0.051	0.090	0.018	0.002	0.002	0.003	0.009	0.026	0.048	0.028	0.043	282.426	0.637	0.6282769	2.979880	0.5644507E-05	2.722573
11022011	23	0.032	0.086	0.020	0.002	0.002	0.003	0.008	0.023	0.055	0.029	0.044	281.808	0.672	0.5922806	3.785699	0.1431909E-04	2.422231
11022011	24	0.019	0.085	0.024	0.002	0.002	0.003	0.008	0.021	0.062	0.030	0.044	281.238	0.708	0.5693103	4.761217	0.2656900E-04	2.253343
11032011	01	0.012	0.087	0.028	0.002	0.002	0.002	0.008	0.020	0.069	0.031	0.046	280.677	0.746	0.5252250	5.994271	0.5765543E-04	2.016896
11032011	02	0.008	0.091	0.032	0.001	0.002	0.002	0.008	0.019	0.076	0.033	0.047	280.365	0.775	0.5160056	7.390267	0.9008904E-04	1.913988
11032011	03	0.007	0.095	0.033	0.002	0.002	0.002	0.008	0.019	0.081	0.036	0.048	280.190	0.797	0.5292379	8.697756	0.1112715E-03	1.893023
11032011	04	0.007	0.098	0.031	0.002	0.002	0.002	0.008	0.019	0.088	0.042	0.049	280.112	0.816	0.5725046	10.55057	0.1260835E-03	1.922618
11032011	05	0.009	0.102	0.023	0.002	0.002	0.003	0.008	0.020	0.095	0.051	0.049	280.067	0.835	0.7037652	13.27519	0.9450578E-04	2.147582
11032011	06	0.016	0.107	0.012	0.004	0.003	0.003	0.009	0.021	0.100	0.059	0.049	280.036	0.852	0.8341224	15.45728	0.5357977E-04	2.460132
11032011	07	0.029	0.113	0.006	0.005	0.003	0.004	0.010	0.024	0.096	0.064	0.049	280.048	0.866	0.9157976	18.62379	0.3101691E-04	2.778470
11032011	08	0.035	0.115	0.005	0.005	0.003	0.005	0.011	0.028	0.085	0.063	0.048	280.769	0.855	0.9148828	15.65018	0.1873769E-04	2.921803
11032011	09	0.031	0.112	0.013	0.005	0.004	0.005	0.012	0.031	0.073	0.060	0.047	283.981	0.765	0.7202798	7.247386	0.1007408E-04	2.856976
11032011	10	0.025	0.096	0.037	0.003	0.003	0.003	0.009	0.022	0.056	0.032	0.044	287.577	0.674	0.2582803	3.320164	0.2424801E-04	2.136483
11032011	11	0.018	0.067	0.047	0.001	0.003	0.002	0.005	0.012	0.039	0.006	0.035	290.561	0.614	0.4980481E-01	2.205859	0.1146602E-03	1.284165
11032011	12	0.010	0.045	0.043	0.001	0.002	0.001	0.003	0.007	0.034	0.002	0.028	292.657	0.564	0.1093805E-01	1.637362	0.3275118E-03	0.6989177
11032011	13	0.004	0.036	0.048	0.001	0.002	0.001	0.003	0.007	0.038	0.001	0.027	294.560	0.522	0.8132398E-02	1.391837	0.2581771E-03	0.7316707
11032011	14	0.003	0.023	0.044	0.001	0.002	0.001	0.002	0.006	0.033	0.001	0.024	295.254	0.518	0.5298853E-04	2.095884	0.3319030E-02	-0.1996438
11032011	15	0.003	0.025	0.033	0.001	0.002	0.001	0.002	0.005	0.032	0.001	0.025	293.717	0.561	0.4994869E-04	1.735824	0.2554620E-02	-0.1678206
11032011	16	0.011	0.037	0.022	0.001	0.002	0.001	0.003	0.008	0.033	0.001	0.028	291.818	0.628	0.1772910E-01	1.917661	0.2527546E-03	0.8800728
11032011	17	0.028	0.051	0.019	0.001	0.002	0.002	0.004	0.012	0.029	0.002	0.031	290.069	0.730	0.9565133E-01	2.688575	0.6020754E-04	1.649871
11032011	18	0.004	0.013	0.012	0.000	0.001	0.001	0.002	0.006	0.036	0.000	0.031	287.952	0.875	0.2639145E-01	6.748701	0.3361771E-02	0.3026520
11032011	19	0.014	0.024	0.009	0.001	0.001	0.001	0.001	0.001	0.021	0.002	0.012	286.964	0.914	0.2115247	4.617557	0.4403596E-04	2.020605
11032011	20	0.014	0.027	0.011	0.002	0.002	0.001	0.002	0.003	0.036	0.006	0.021	285.929	0.924	0.3943788	9.555542	0.7626324E-04	2.097940
11032011	21	0.007	0.028	0.016	0.003	0.003	0.001	0.003	0.006	0.053	0.011	0.032	284.479	0.922	0.3709958	13.81128	0.2168368E-03	1.804101
11032011	22	0.005	0.027	0.016	0.004	0.003	0.001	0.003	0.007	0.057	0.012	0.034	283.381	0.910	0.3749261	12.80720	0.2319984E-03	1.741969
11032011	23	0.004	0.023	0.014	0.004	0.003	0.001	0.003	0.006	0.050	0.008	0.032	282.893	0.891	0.2655153	9.034925	0.2669403E-03	1.529510
11032011	24	0.002	0.022	0.013	0.004	0.002	0.001	0.002	0.005	0.035	0.002	0.024	282.144	0.877	0.2433658E-03	7.997401	0.1597585E-02	0.6994849
11042011	01	0.005	0.020	0.012	0.004	0.002	0.001	0.002	0.005	0.021	0.004	0.017	281.322	0.853	0.1794270	3.166504	0.8066325E-04	1.593904
11042011	02	0.005	0.022	0.015	0.003	0.002	0.001	0.002	0.004	0.016	0.004	0.014	280.484	0.836	0.1528380	2.547125	0.7096417E-04	1.555011
11042011	03	0.005	0.026	0.016	0.002	0.003	0.001	0.002	0.005	0.014	0.004	0.013	279.876	0.840	0.2246978	2.366851	0.3364808E-04	1.847211
11042011	04	0.005	0.030	0.015	0.002	0.003	0.001	0.002	0.005	0.013	0.005	0.012	279.716	0.843	0.2451924	2.218905	0.2441919E-04	1.958407
11042011	05	0.007	0.033	0.014	0.002	0.003	0.001	0.002	0.005	0.014	0.007	0.012	279.639	0.845	0.3180968	2.641121	0.2146164E-04	2.090126
11042011	06	0.012	0.034	0.011	0.002	0.003	0.001	0.003	0.006	0.015	0.010	0.012	279.650	0.840	0.4715915	2.730950	0.9583829E-05	2.454775
11042011	07	0.017	0.032	0.011	0.002	0.003	0.002	0.004	0.009	0.013	0.012	0.012	279.632	0.844	0.5171086	2.322766	0.4483157E-05	2.714422
11042011	08	0.018	0.036	0.013	0.002	0.003	0.002	0.004	0.011	0.013	0.012	0.013	280.071	0.841	0.4587905	2.014233	0.3728957E-05	2.732522
11042011	09	0.018	0.036	0.016	0.002	0.003	0.002	0.004	0.010	0.011	0.010	0.013	282.015	0.772	0.2609478	1.027343	0.2073225E-05	2.695069
11042011	10	0.016	0.028	0.023	0.002	0.002	0.001	0.003	0.008	0.008	0.006	0.013	284.738	0.665	0.8899021E-01	0.7119139	0.5231327E-05	2.133816
11042011	11	0.010	0.034	0.033	0.001	0.002	0.001	0.002	0.006	0.015	0.003	0.014	286.671	0.615	0.3744042E-01	0.8407364	0.3284787E-04	1.408153
11042011	12	0.008	0.045	0.032	0.001	0.001	0.001	0.002	0.004	0.016	0.001	0.014	287.886	0.589	0.1631612E-01	0.8865709	0.9990085E-04	0.9481443
11042011	13	0.004	0.055	0.034	0.001	0.001	0.001	0.001	0.004	0.023	0.001	0.017	288.714	0.575	0.1107454E-03	1.868259	0.2011275E-02	-0.3203435E-01
11042011	14	0.001	0.062	0.037	0.001	0.001	0.001	0.002	0.004	0.033	0.000	0.024	289.028	0.572	0.000000	1.578333	0.2218548E-02	-0.1478702
11042011	15	0.001	0.072	0.041	0.001	0.001	0.001	0.002	0.004	0.042	0.000	0.032	288.645	0.586	0.000000	2.115204	0.7100753E-02	-0.5259520
11042011	16	0.001	0.079	0.043	0.001	0.001	0.001	0.002	0.005	0.051	0.000	0.038	288.003	0.605	0.000000	2.669886	0.7870967E-02	-0.4695354
11042011	17	0.001	0.080	0.040	0.001	0.001	0.001	0.002	0.006	0.060	0.000	0.044	286.944	0.628	0.000000	3.289024	0.8654678E-02	-0.4201839
11042011	18	0.009	0.087	0.030	0.001	0.002	0.001	0.004	0.010	0.072	0.002	0.049	285.786	0.657	0.1086001	4.169593	0.4196363E-03	0.9972207
11042011	19	0.026	0.100	0.021	0.001	0.002	0.002	0.005	0.016	0.078	0.012	0.054	284.938	0.693	0.3889068	5.067951	0.8829411E-04	1.758901
11042011	20	0.028	0.109	0.018	0.002	0.002	0.002	0.006	0.019	0.092	0.022	0.059	284.251	0.722	0.5348482	6.446352	0.6672983E-04	1.984994
11042011	21	0.025	0.111	0.017	0.002	0.002	0.002	0.007	0.020	0.104	0.026	0.065	283.550	0.744	0.5938354	7.929498	0.8082522E-04	1.991699
11042011	22	0.018	0.109	0.017	0.002	0.002	0.002	0.007	0.020	0.113	0.028	0.069	282.687	0.775	0.6179368	10.24553	0.1205201E-03	1.929475
11042011	23	0.011	0.106	0.022	0.002	0.002	0.002	0.007	0.019	0.119	0.028	0.072	282.022	0.792	0.5387481	11.27354	0.2248870E-03	1.700096
11042011	24	0.005	0.100	0.030	0.002	0.002	0.002	0.007	0.018	0.124	0.027	0.073	281.137	0.831	0.4811692	14.33439	0.4343521E-03	1.518537
11052011	01	0.002	0.097	0.043	0.001	0.002	0.002	0.007	0.016	0.126	0.020	0.076	280.476	0.852	0.3317365	16.20116	0.1134335E-02	1.154805
11052011	02	0.000	0.100	0.057	0.001	0.002	0.002	0.007	0.014	0.126	0.013	0.079	279.821	0.873	0.1612349	21.20300	0.1183291E-01	0.2533059
11052011	03	0.000	0.105	0.061	0.001	0.002	0.002	0.007	0.013	0.126	0.012	0.083	279.382	0.883	0.1395695	19.21924	0.1117853E-01	0.2353517
11052011	04	0.000	0.112	0.067	0.001	0.003	0.002	0.007	0.013	0.128	0.011	0.089	278.990	0.892	0.1216165	22.43254	0.1497051E-01	0.1756417
11052011	05	0.000	0.117	0.068	0.000	0.003	0.002	0.007	0.014	0.134	0.011	0.095	278.722	0.895	0.1297142	26.05734	0.1743897E-01	0.1744093
11052011	06	0.000	0.118	0.062	0.001	0.003	0.002	0.007	0.016	0.147	0.013	0.100	278.550	0.893	0.1549321	24.90987	0.1566922E-01	0.2013242
11052011	07	0.000	0.118	0.055	0.001	0.003	0.002	0.008	0.018	0.165	0.019	0.103	278.421	0.891	0.2288960	31.37733	0.1739700E-01	0.2561416
11052011	08	0.001	0.120	0.045	0.002	0.003	0.003	0.009	0.022	0.181	0.037	0.105	278.814	0.858	0.4355065	25.02956	0.1961462E-02	1.105873
11052011	09	0.003	0.109	0.053	0.002	0.004	0.004	0.010	0.023	0.186	0.050	0.102	281.762	0.709	0.4586303	12.49256	0.4993503E-03	1.398246
11052011	10	0.008	0.069	0.053	0.002	0.003	0.002	0.008	0.015	0.135	0.044	0.069	283.709	0.613	0.3691043	6.113907	0.1683948E-03	1.559990
11052011	11	0.021	0.047	0.042	0.001	0.002	0.001	0.005	0.008	0.078	0.032	0.036	285.391	0.537	0.2645333	2.528654	0.4161174E-04	1.783674
11052011	12	0.028	0.043	0.047	0.001	0.001	0.001	0.004	0.006	0.056	0.022	0.027	286.831	0.476	0.1400768	1.451097	0.3415406E-04	1.628254
11052011	13	0.047	0.038	0.061	0.000	0.001	0.001	0.003	0.006	0.031	0.007	0.021	288.235	0.418	NaN	1.515114	0.1324514E-01	-0.9416113
11052011	14	0.060	0.034	0.064	0.000	0.001	0.001	0.003	0.006	0.021	0.004	0.017	288.859	0.382	NaN	1.187152	0.2653250E-02	-0.3492720
11052011	15	0.073	0.031	0.061	0.000	0.001	0.001	0.003	0.006	0.016	0.003	0.015	288.292	0.376	NaN	1.087684	0.4009004E-05	2.433466
11052011	16	0.090	0.029	0.055	0.000	0.001	0.001	0.003	0.006	0.013	0.004	0.013	287.279	0.383	NaN	0.9456587	0.8781332E-06	3.032174
11052011	17	0.108	0.028	0.047	0.000	0.001	0.001	0.003	0.006	0.012	0.006	0.012	285.806	0.395	NaN	0.9370358	0.4359441E-06	3.332325
11052011	18	0.119	0.032	0.027	0.001	0.001	0.001	0.003	0.008	0.019	0.017	0.012	284.190	0.411	0.2465938	0.3458781	0.2091043E-06	3.218560
11052011	19	0.134	0.040	0.017	0.001	0.001	0.002	0.004	0.012	0.020	0.020	0.012	282.892	0.435	0.3650588	0.2124728	0.9486042E-08	4.350218
11052011	20	0.128	0.041	0.014	0.001	0.002	0.002	0.005	0.014	0.025	0.025	0.012	282.304	0.454	0.4851042	0.3160738	0.1495130E-07	4.325109
11052011	21	0.102	0.037	0.012	0.001	0.002	0.002	0.005	0.013	0.026	0.026	0.012	281.784	0.486	0.5075703	0.4029737	0.3182198E-07	4.102550
11052011	22	0.074	0.032	0.020	0.001	0.002	0.002	0.004	0.011	0.013	0.013	0.012	281.383	0.519	0.2761201	0.2460054	0.5322431E-07	3.664835
11052011	23	0.044	0.029	0.020	0.001	0.001	0.001	0.004	0.008	0.010	0.010	0.012	281.026	0.551	0.2927513	0.5388812	0.5945803E-06	2.957283
11052011	24	0.030	0.029	0.022	0.001	0.001	0.001	0.003	0.007	0.012	0.010	0.011	280.698	0.581	0.2631328	0.6174839	0.1145604E-05	2.731591
11062011	01	0.027	0.031	0.025	0.001	0.001	0.001	0.003	0.006	0.016	0.015	0.010	280.370	0.611	0.3305340	0.8718399	0.1406980E-05	2.792149
11062011	02	0.026	0.033	0.026	0.002	0.001	0.001	0.003	0.006	0.023	0.022	0.009	280.172	0.633	0.4282857	1.159990	0.1172853E-05	2.995211
11062011	03	0.025	0.036	0.025	0.002	0.002	0.001	0.003	0.006	0.027	0.026	0.009	280.147	0.644	0.4699520	1.340990	0.1397414E-05	2.982100
11062011	04	0.026	0.039	0.024	0.002	0.002	0.001	0.003	0.005	0.029	0.028	0.009	280.204	0.651	0.5031556	1.635940	0.1983593E-05	2.916315
11062011	05	0.027	0.041	0.023	0.002	0.002	0.001	0.003	0.006	0.030	0.029	0.009	280.301	0.656	0.5196614	1.611223	0.1643543E-05	2.991374
11062011	06	0.030	0.043	0.022	0.002	0.002	0.001	0.003	0.006	0.030	0.029	0.009	280.465	0.659	0.5330503	1.620084	0.1536822E-05	3.022914
11062011	07	0.033	0.046	0.021	0.002	0.002	0.001	0.004	0.007	0.029	0.029	0.010	280.647	0.661	0.5313872	1.540553	0.1339114E-05	3.060859
11062011	08	0.038	0.049	0.021	0.002	0.002	0.001	0.004	0.009	0.027	0.026	0.010	281.294	0.655	0.4669917	1.111731	0.7331063E-06	3.180833
11062011	09	0.044	0.050	0.026	0.001	0.002	0.002	0.004	0.010	0.019	0.019	0.011	283.553	0.613	0.1291640	0.2646591	0.1550029E-06	3.232347
11062011	10	0.038	0.042	0.031	0.001	0.002	0.001	0.003	0.007	0.010	0.009	0.011	286.054	0.568	0.9967333E-01	0.4734419	0.1272481E-05	2.570616
11062011	11	0.029	0.032	0.029	0.002	0.002	0.001	0.002	0.005	0.007	0.003	0.011	288.131	0.539	0.3556275E-01	0.5161030	0.1030938E-04	1.699504
11062011	12	0.026	0.027	0.030	0.001	0.002	0.001	0.002	0.005	0.007	0.002	0.011	289.834	0.513	0.1894903E-01	0.4606781	0.1394291E-04	1.519044
11062011	13	0.027	0.025	0.035	0.001	0.002	0.001	0.002	0.005	0.007	0.001	0.011	291.207	0.489	0.1301169E-01	0.4326206	0.1535191E-04	1.449945
11062011	14	0.028	0.023	0.037	0.001	0.002	0.001	0.002	0.005	0.007	0.001	0.011	291.707	0.486	0.1190442E-01	0.4322667	0.1541825E-04	1.447717
11062011	15	0.030	0.021	0.035	0.001	0.002	0.001	0.002	0.005	0.007	0.001	0.010	291.157	0.512	0.1631457E-01	0.3942037	0.7729266E-05	1.707582
11062011	16	0.034	0.021	0.031	0.001	0.002	0.001	0.002	0.005	0.006	0.001	0.010	290.158	0.553	0.2621597E-01	0.4484935	0.6357852E-05	1.848446
11062011	17	0.043	0.021	0.024	0.001	0.002	0.001	0.002	0.006	0.005	0.002	0.010	288.776	0.597	0.5711383E-01	0.4564116	0.2215690E-05	2.313848
11062011	18	0.047	0.020	0.016	0.001	0.002	0.001	0.003	0.008	0.002	0.002	0.012	287.729	0.646	0.1049812	0.5337568	0.1233966E-05	2.636040
11062011	19	0.049	0.020	0.016	0.001	0.002	0.002	0.004	0.012	0.001	0.001	0.013	286.546	0.704	0.3979498E-01	0.1286158	0.8613237E-07	3.174128
11062011	20	0.048	0.024	0.018	0.001	0.002	0.003	0.005	0.015	0.001	0.001	0.014	285.336	0.767	0.1034737E-03	0.1650546E-03	0.3064853E-09	2.731218
11062011	21	0.040	0.024	0.016	0.001	0.003	0.003	0.005	0.016	0.005	0.005	0.015	284.578	0.806	0.1056790E-03	0.2417309E-03	0.5307634E-09	2.658431
11062011	22	0.033	0.022	0.015	0.001	0.002	0.003	0.006	0.016	0.007	0.007	0.015	283.846	0.840	0.1915693E-03	0.5767990E-03	0.1446051E-08	2.600841
11062011	23	0.026	0.020	0.015	0.001	0.002	0.003	0.005	0.015	0.006	0.006	0.014	283.302	0.861	0.1500326E-01	0.5151609E-01	0.1602527E-06	2.507138
11062011	24	0.021	0.019	0.010	0.002	0.002	0.003	0.005	0.016	0.004	0.011	0.012	282.858	0.875	NaN	4.913439	0.1814899E-05	3.432533
11072011	01	0.014	0.020	0.000	0.004	0.002	0.002	0.006	0.017	0.007	0.028	0.011	282.419	0.890	NaN	7.260696	0.1262614E-04	2.759708
11072011	02	0.007	0.021	0.000	0.006	0.002	0.002	0.006	0.018	0.015	0.036	0.011	282.050	0.899	NaN	10.63083	0.5648495E-04	2.274635
11072011	03	0.002	0.022	0.000	0.007	0.002	0.002	0.006	0.018	0.022	0.042	0.011	281.746	0.907	NaN	13.78623	0.3692430E-03	1.572133
11072011	04	0.000	0.024	0.000	0.009	0.002	0.002	0.006	0.019	0.028	0.048	0.011	281.502	0.913	0.9253424	14.86334	0.1417259E-03	2.020667
11072011	05	0.003	0.026	0.002	0.010	0.002	0.002	0.006	0.020	0.031	0.053	0.011	281.306	0.918	0.8578200	17.59015	0.6514096E-04	2.431415
11072011	06	0.012	0.030	0.001	0.010	0.003	0.003	0.007	0.021	0.035	0.061	0.011	281.197	0.918	NaN	23.18456	0.7403477E-04	2.495763
11072011	07	0.031	0.037	0.000	0.011	0.003	0.004	0.008	0.025	0.034	0.069	0.012	281.043	0.923	NaN	25.64351	0.2607672E-04	2.992724
11072011	08	0.050	0.045	0.000	0.012	0.003	0.005	0.010	0.031	0.029	0.077	0.012	281.546	0.895	NaN	22.59945	0.1111868E-04	3.308044
11072011	09	0.040	0.047	0.000	0.013	0.003	0.005	0.011	0.035	0.038	0.094	0.013	284.629	0.780	NaN	12.76951	0.1265984E-04	3.003746
11072011	10	0.006	0.042	0.001	0.013	0.003	0.004	0.009	0.028	0.058	0.105	0.013	287.830	0.679	0.9694175	8.502431	0.1210054E-02	0.8467384
11072011	11	0.020	0.049	0.039	0.004	0.003	0.002	0.005	0.014	0.016	0.027	0.013	290.439	0.609	0.000000	0.4811966E-08	0.1000132E-13	2.682265
11072011	12	0.019	0.058	0.043	0.001	0.002	0.001	0.003	0.008	0.005	0.003	0.014	292.279	0.549	0.8845508E-02	0.4874994	0.1738671E-04	1.447757
11072011	13	0.015	0.056	0.047	0.001	0.002	0.001	0.003	0.007	0.007	0.002	0.013	293.881	0.504	0.4380405E-02	0.4165147	0.2253724E-04	1.266730
11072011	14	0.017	0.049	0.053	0.001	0.001	0.001	0.002	0.006	0.008	0.002	0.013	294.484	0.489	0.3025472E-02	0.4687866	0.5514082E-04	0.9295020
11072011	15	0.021	0.044	0.055	0.001	0.001	0.001	0.002	0.007	0.008	0.002	0.013	293.835	0.507	0.4866540E-02	0.4338943	0.2651281E-04	1.213928
11072011	16	0.028	0.039	0.051	0.001	0.001	0.001	0.002	0.007	0.007	0.002	0.013	292.638	0.542	0.9442329E-02	0.4797715	0.1832809E-04	1.417917
11072011	17	0.037	0.037	0.039	0.001	0.001	0.001	0.003	0.007	0.005	0.002	0.012	290.943	0.589	0.2325630E-01	0.4678883	0.4976616E-05	1.973208
11072011	18	0.061	0.045	0.027	0.001	0.001	0.002	0.004	0.012	0.002	0.002	0.013	288.962	0.647	0.1964217E-01	0.9012447E-01	0.5603581E-07	3.206377
11072011	19	0.084	0.060	0.002	0.004	0.002	0.003	0.006	0.023	0.002	0.024	0.014	287.175	0.716	NaN	3.332350	0.1825227E-09	7.261434
11072011	20	0.086	0.064	0.000	0.005	0.002	0.003	0.008	0.027	0.002	0.033	0.014	285.859	0.761	NaN	4.809968	0.2567327E-09	7.272661
11072011	21	0.086	0.063	0.000	0.005	0.002	0.003	0.008	0.028	0.002	0.034	0.015	284.937	0.802	NaN	5.583931	0.2939856E-09	7.278614
11072011	22	0.081	0.059	0.000	0.005	0.002	0.003	0.008	0.027	0.002	0.034	0.015	284.315	0.824	NaN	5.906666	0.3067634E-09	7.284539
11072011	23	0.070	0.055	0.000	0.005	0.002	0.003	0.008	0.025	0.004	0.037	0.014	283.842	0.839	NaN	6.809746	0.9985677E-06	3.833753
11072011	24	0.051	0.049	0.000	0.005	0.002	0.003	0.008	0.024	0.007	0.038	0.014	283.247	0.876	NaN	8.989661	0.2928159E-05	3.487149
11082011	01	0.032	0.044	0.000	0.006	0.002	0.003	0.008	0.023	0.010	0.038	0.014	283.129	0.889	NaN	10.10742	0.7133019E-05	3.151367
11082011	02	0.017	0.042	0.000	0.006	0.002	0.002	0.007	0.021	0.013	0.038	0.013	282.821	0.904	NaN	11.01869	0.2352879E-04	2.670530
11082011	03	0.008	0.043	0.000	0.007	0.002	0.002	0.007	0.020	0.018	0.040	0.013	282.599	0.909	NaN	13.24016	0.8198164E-04	2.208177
11082011	04	0.002	0.045	0.000	0.009	0.002	0.002	0.007	0.020	0.025	0.046	0.013	282.419	0.910	NaN	15.35870	0.1444212E-02	1.026724
11082011	05	0.001	0.048	0.000	0.010	0.003	0.002	0.008	0.020	0.033	0.054	0.013	282.239	0.910	NaN	17.87894	0.1519016E-02	1.070780
11082011	06	0.007	0.054	0.000	0.010	0.003	0.003	0.008	0.021	0.042	0.064	0.014	282.052	0.911	NaN	21.18211	0.1628452E-03	2.114194
11082011	07	0.021	0.063	0.000	0.010	0.003	0.004	0.009	0.024	0.047	0.076	0.015	281.840	0.914	NaN	24.47898	0.5447613E-04	2.652587
11082011	08	0.030	0.074	0.000	0.010	0.003	0.005	0.011	0.028	0.054	0.092	0.016	282.200	0.894	NaN	23.27282	0.3598017E-04	2.810786
11082011	09	0.011	0.080	0.000	0.012	0.003	0.005	0.012	0.032	0.085	0.131	0.017	284.920	0.804	NaN	16.89842	0.1390440E-03	2.084694
11082011	10	0.004	0.075	0.011	0.011	0.003	0.004	0.011	0.027	0.077	0.147	0.017	287.951	0.714	NaN	9.433681	0.4600865E-01	-0.6881584
11082011	11	0.041	0.102	0.098	0.001	0.003	0.003	0.008	0.018	0.013	0.013	0.020	290.921	0.625	0.1641577E-01	0.1851308	0.1951152E-06	2.977187
11082011	12	0.024	0.140	0.069	0.001	0.003	0.002	0.005	0.011	0.018	0.007	0.023	292.782	0.572	0.2315730E-01	1.068649	0.2827197E-04	1.577479
11082011	13	0.014	0.122	0.062	0.001	0.003	0.001	0.004	0.008	0.021	0.004	0.022	294.100	0.542	0.7572830E-02	1.044032	0.1271448E-03	0.9144154
11082011	14	0.013	0.103	0.066	0.001	0.002	0.001	0.003	0.008	0.021	0.003	0.021	294.663	0.532	0.5351603E-02	0.9441572	0.1448964E-03	0.8139868
11082011	15	0.013	0.090	0.064	0.001	0.002	0.001	0.003	0.007	0.021	0.003	0.021	293.961	0.553	0.6313682E-02	1.074682	0.1752085E-03	0.7877250
11082011	16	0.011	0.079	0.056	0.001	0.002	0.001	0.003	0.007	0.026	0.003	0.024	292.531	0.587	0.9417951E-02	1.457868	0.2617531E-03	0.7458265
11082011	17	0.020	0.077	0.042	0.001	0.002	0.002	0.004	0.009	0.029	0.003	0.027	290.859	0.628	0.4143023E-01	1.847208	0.8250343E-04	1.350044
11082011	18	0.057	0.083	0.024	0.001	0.003	0.003	0.005	0.016	0.015	0.005	0.027	289.080	0.687	0.1966171	1.725390	0.5837151E-05	2.470686
11082011	19	0.076	0.090	0.021	0.001	0.003	0.004	0.008	0.026	0.003	0.003	0.026	287.483	0.747	0.1134276E-03	0.2026746E-03	0.2829161E-09	2.855142
11082011	20	0.072	0.090	0.016	0.001	0.003	0.004	0.009	0.031	0.004	0.006	0.024	286.299	0.784	0.1229048E-03	0.2407300E-03	0.3450744E-09	2.843617
11082011	21	0.069	0.086	0.012	0.002	0.004	0.004	0.010	0.032	0.004	0.008	0.023	285.531	0.807	NaN	3.266302	0.1770061E-09	7.266068
11082011	22	0.060	0.080	0.012	0.002	0.004	0.004	0.010	0.029	0.005	0.008	0.022	284.877	0.831	0.4198976	1.215561	0.1259710E-05	2.984506
11082011	23	0.045	0.077	0.014	0.002	0.003	0.003	0.010	0.026	0.008	0.008	0.022	284.347	0.850	0.1618412	0.5462968	0.1217413E-05	2.651991
11082011	24	0.030	0.079	0.018	0.002	0.003	0.003	0.009	0.023	0.009	0.008	0.022	283.973	0.869	0.2075316	0.9924335	0.3242524E-05	2.485818
11092011	01	0.020	0.081	0.020	0.002	0.003	0.003	0.008	0.021	0.009	0.009	0.022	283.521	0.892	0.3126583	2.344960	0.7196979E-05	2.512985
11092011	02	0.012	0.079	0.019	0.003	0.003	0.002	0.008	0.020	0.014	0.013	0.022	283.214	0.905	0.3976480	4.490021	0.1736662E-04	2.412533
11092011	03	0.009	0.068	0.019	0.003	0.003	0.002	0.007	0.018	0.016	0.015	0.022	283.076	0.910	0.4265129	5.707778	0.2296208E-04	2.395456
11092011	04	0.009	0.055	0.019	0.003	0.003	0.002	0.007	0.018	0.017	0.015	0.022	283.007	0.910	0.4446267	5.894762	0.2312278E-04	2.406426
11092011	05	0.012	0.048	0.019	0.003	0.003	0.002	0.007	0.019	0.018	0.016	0.022	283.006	0.911	0.4812073	6.050603	0.2238121E-04	2.431915
11092011	06	0.018	0.048	0.015	0.004	0.003	0.003	0.008	0.022	0.021	0.019	0.021	282.788	0.924	0.5877856	7.069923	0.3457150E-04	2.310697
11092011	07	0.033	0.056	0.011	0.004	0.003	0.004	0.009	0.026	0.023	0.022	0.022	282.923	0.921	0.7419147	8.791856	0.2601928E-04	2.528785
11092011	08	0.053	0.060	0.002	0.007	0.004	0.005	0.011	0.030	0.010	0.031	0.023	283.399	0.902	0.7445072	7.412147	0.1623647E-04	2.659452
11092011	09	0.052	0.064	0.000	0.008	0.004	0.005	0.012	0.033	0.004	0.042	0.023	285.946	0.837	NaN	8.334413	0.1791444E-05	3.667672
11092011	10	0.030	0.065	0.029	0.003	0.004	0.004	0.011	0.029	0.007	0.020	0.022	289.243	0.747	0.1069103	0.4877322	0.5589490E-06	2.940809
11092011	11	0.021	0.063	0.050	0.001	0.003	0.002	0.007	0.016	0.004	0.005	0.019	291.547	0.686	0.1992863E-01	0.3090913	0.4358379E-06	2.850762
11092011	12	0.017	0.064	0.045	0.001	0.002	0.001	0.004	0.010	0.004	0.004	0.015	293.038	0.641	0.1369226E-01	0.5385700	0.5728687E-05	1.973187
11092011	13	0.017	0.050	0.046	0.001	0.002	0.001	0.003	0.008	0.004	0.002	0.013	294.118	0.606	0.7415175E-02	0.4947656	0.1060995E-04	1.668686
11092011	14	0.016	0.039	0.054	0.001	0.002	0.001	0.003	0.007	0.004	0.002	0.012	294.699	0.596	0.5841672E-02	0.4782825	0.1169258E-04	1.611774
11092011	15	0.017	0.035	0.058	0.000	0.002	0.001	0.003	0.008	0.005	0.002	0.013	293.465	0.620	NaN	1.233602	0.4082683E-01	-1.519771
11092011	16	0.033	0.049	0.050	0.000	0.002	0.002	0.004	0.012	0.002	0.002	0.015	292.592	0.656	NaN	1.905133	0.1608292E-01	-0.9264395
11092011	17	0.059	0.072	0.040	0.001	0.002	0.003	0.006	0.021	0.002	0.006	0.018	291.951	0.699	0.000000	0.3929618E-08	0.1000236E-13	2.594248
11092011	18	0.108	0.105	0.000	0.008	0.003	0.006	0.009	0.036	0.002	0.040	0.020	290.648	0.745	NaN	6.197597	0.4002456E-09	7.189897
11092011	19	0.138	0.131	0.000	0.009	0.003	0.006	0.012	0.045	0.002	0.040	0.022	289.435	0.791	NaN	6.755246	0.4276099E-09	7.198594
11092011	20	0.150	0.139	0.000	0.010	0.004	0.007	0.013	0.049	0.002	0.043	0.022	288.602	0.839	NaN	8.940605	0.5629817E-09	7.200873
11092011	21	0.107	0.121	0.000	0.009	0.003	0.005	0.011	0.041	0.003	0.041	0.022	287.948	0.858	NaN	9.590384	0.5941519E-09	7.207939
11092011	22	0.063	0.095	0.000	0.007	0.003	0.004	0.010	0.032	0.003	0.031	0.021	287.098	0.889	NaN	9.219997	0.5608798E-09	7.215861
11092011	23	0.037	0.076	0.014	0.002	0.003	0.004	0.009	0.028	0.006	0.011	0.021	286.884	0.871	0.2440761	1.211411	0.2579971E-05	2.671677
11092011	24	0.024	0.052	0.013	0.002	0.004	0.004	0.009	0.027	0.005	0.005	0.023	286.070	0.921	0.1240373E-03	0.7649456E-03	0.3433610E-08	2.347880
11102011	01	0.017	0.035	0.010	0.003	0.004	0.003	0.009	0.025	0.008	0.008	0.027	285.974	0.894	0.1821972	1.363137	0.2386526E-05	2.756773
11102011	02	0.012	0.024	0.012	0.003	0.004	0.003	0.008	0.022	0.014	0.011	0.028	285.247	0.889	0.3849897	3.863989	0.9322889E-05	2.617485
11102011	03	0.012	0.019	0.017	0.005	0.004	0.003	0.007	0.019	0.017	0.017	0.026	284.319	0.884	0.4170120	4.997959	0.1556433E-04	2.506662
11102011	04	0.011	0.017	0.021	0.005	0.004	0.002	0.006	0.014	0.023	0.020	0.022	283.336	0.867	0.4475822	5.599906	0.2122366E-04	2.421360
11102011	05	0.013	0.015	0.020	0.004	0.003	0.001	0.005	0.009	0.026	0.018	0.019	282.295	0.844	0.4068087	4.352895	0.2341326E-04	2.269316
11102011	06	0.014	0.016	0.017	0.002	0.003	0.001	0.003	0.007	0.025	0.014	0.017	281.272	0.817	0.4182510	3.490184	0.2068585E-04	2.227175
11102011	07	0.017	0.016	0.012	0.002	0.003	0.001	0.003	0.007	0.023	0.013	0.016	280.288	0.783	0.4669309	2.558652	0.1126697E-04	2.356204
11102011	08	0.020	0.017	0.011	0.002	0.003	0.001	0.003	0.008	0.022	0.013	0.016	279.915	0.737	0.4823673	1.997831	0.6840694E-05	2.465459
11102011	09	0.020	0.020	0.013	0.002	0.003	0.001	0.003	0.008	0.020	0.011	0.017	281.244	0.661	0.3047028	1.347115	0.9040380E-05	2.173218
11102011	10	0.012	0.031	0.020	0.001	0.003	0.001	0.002	0.007	0.024	0.006	0.019	282.798	0.592	0.1382048	1.197305	0.3312113E-04	1.558100
11102011	11	0.007	0.040	0.023	0.001	0.002	0.001	0.002	0.005	0.030	0.003	0.022	284.099	0.537	0.5385625E-01	1.312080	0.1520578E-03	0.9359517
11102011	12	0.006	0.044	0.023	0.001	0.002	0.001	0.002	0.005	0.030	0.002	0.022	284.949	0.490	0.3498548E-01	1.125066	0.1859565E-03	0.7817667
11102011	13	0.007	0.038	0.023	0.001	0.002	0.001	0.002	0.004	0.028	0.002	0.020	285.534	0.451	0.2907336E-01	0.9443998	0.1623622E-03	0.7646711
11102011	14	0.009	0.037	0.025	0.001	0.001	0.001	0.002	0.004	0.029	0.002	0.020	285.546	0.434	0.3195935E-01	0.8746275	0.1373498E-03	0.8039951
11102011	15	0.012	0.038	0.025	0.001	0.001	0.001	0.002	0.004	0.030	0.003	0.020	285.223	0.426	0.4688734E-01	0.8820084	0.9541565E-04	0.9658532
11102011	16	0.016	0.041	0.023	0.001	0.001	0.001	0.002	0.004	0.030	0.003	0.020	284.552	0.426	0.6996250E-01	0.8899974	0.6796105E-04	1.117129
11102011	17	0.023	0.047	0.019	0.001	0.001	0.001	0.002	0.005	0.028	0.004	0.019	283.430	0.430	0.1209230	0.8002742	0.3118074E-04	1.409352
11102011	18	0.038	0.056	0.015	0.001	0.001	0.001	0.002	0.007	0.023	0.006	0.018	282.320	0.436	0.2079857	0.6899422	0.1036063E-04	1.823427
11102011	19	0.058	0.067	0.014	0.001	0.002	0.001	0.003	0.011	0.016	0.008	0.019	281.648	0.443	0.2976083	0.5611162	0.2532089E-05	2.345574
11102011	20	0.064	0.074	0.014	0.001	0.002	0.002	0.004	0.014	0.014	0.010	0.020	281.120	0.449	0.3788300	0.5440325	0.6078457E-06	2.951832
11102011	21	0.057	0.077	0.013	0.001	0.002	0.001	0.004	0.013	0.018	0.011	0.020	280.557	0.455	0.3884116	0.5722501	0.1197674E-05	2.679247
11102011	22	0.047	0.077	0.011	0.001	0.002	0.001	0.004	0.011	0.021	0.010	0.020	280.017	0.458	0.4037806	0.6721015	0.2528132E-05	2.424635
11102011	23	0.036	0.074	0.011	0.001	0.002	0.001	0.003	0.008	0.019	0.007	0.018	279.697	0.451	0.3414928	0.6855264	0.5398700E-05	2.103735
11102011	24	0.027	0.069	0.011	0.002	0.002	0.001	0.003	0.007	0.013	0.005	0.014	279.038	0.456	0.2752968	0.5083287	0.3466445E-05	2.166260
11112011	01	0.021	0.066	0.012	0.001	0.002	0.001	0.003	0.006	0.010	0.004	0.012	278.382	0.463	0.2419204	0.4389263	0.3100833E-05	2.150913
11112011	02	0.016	0.067	0.012	0.001	0.002	0.001	0.002	0.006	0.011	0.004	0.012	277.670	0.480	0.2423375	0.4904943	0.4488266E-05	2.038555
11112011	03	0.012	0.071	0.013	0.001	0.002	0.001	0.002	0.006	0.014	0.005	0.013	276.859	0.507	0.2739626	0.6296210	0.6843586E-05	1.963796
11112011	04	0.010	0.077	0.013	0.001	0.002	0.001	0.002	0.006	0.018	0.006	0.015	275.980	0.541	0.3232711	0.8695984	0.1231622E-04	1.848841
11112011	05	0.008	0.086	0.013	0.001	0.002	0.001	0.003	0.006	0.024	0.008	0.016	275.102	0.577	0.4421217	1.151809	0.1106672E-04	2.017362
11112011	06	0.008	0.096	0.012	0.001	0.002	0.001	0.003	0.006	0.030	0.013	0.018	274.238	0.616	0.5287009	1.657643	0.1588356E-04	2.018543
11112011	07	0.009	0.107	0.010	0.002	0.002	0.001	0.003	0.007	0.037	0.020	0.018	273.352	0.659	0.7024963	2.213723	0.9227971E-05	2.380017
11112011	08	0.010	0.116	0.009	0.002	0.002	0.001	0.004	0.008	0.042	0.027	0.019	273.440	0.644	0.7404217	2.274477	0.6811340E-05	2.523649
11112011	09	0.012	0.120	0.011	0.002	0.002	0.001	0.004	0.009	0.042	0.028	0.019	275.456	0.556	0.6507367	1.544992	0.3767778E-05	2.612841
11112011	10	0.015	0.117	0.016	0.001	0.002	0.001	0.004	0.009	0.036	0.021	0.020	278.158	0.454	0.4062920	0.8680335	0.4676805E-05	2.268587
11112011	11	0.017	0.111	0.021	0.001	0.002	0.001	0.004	0.009	0.029	0.013	0.020	280.907	0.368	0.1828960	0.5463477	0.8834070E-05	1.791308
11112011	12	0.015	0.094	0.026	0.000	0.001	0.001	0.003	0.008	0.025	0.006	0.020	283.441	0.300	NaN	0.5445920	0.9975367E-02	-1.262858
11112011	13	0.013	0.073	0.029	0.000	0.001	0.001	0.003	0.007	0.025	0.004	0.020	285.392	0.253	NaN	0.4401182	0.1499870E-01	-1.532484
11112011	14	0.015	0.061	0.029	0.000	0.001	0.001	0.002	0.006	0.025	0.003	0.019	286.175	0.239	NaN	0.4333465	0.1299836E-01	-1.477053
11112011	15	0.018	0.057	0.030	0.000	0.001	0.001	0.002	0.006	0.024	0.004	0.018	285.601	0.256	NaN	0.4678294	0.1099329E-01	-1.371040
11112011	16	0.023	0.060	0.031	0.000	0.001	0.001	0.002	0.006	0.023	0.005	0.018	284.575	0.286	NaN	0.5609317	0.8972768E-02	-1.204016
11112011	17	0.029	0.066	0.029	0.000	0.001	0.001	0.003	0.007	0.023	0.006	0.018	283.164	0.324	NaN	0.6487316	0.3905649E-04	1.220372
11112011	18	0.038	0.078	0.025	0.000	0.001	0.001	0.003	0.009	0.021	0.009	0.018	281.705	0.368	NaN	0.7330169	0.2767229E-05	2.423069
11112011	19	0.069	0.099	0.018	0.000	0.002	0.002	0.006	0.018	0.016	0.015	0.019	280.521	0.420	NaN	0.4675052	0.4281027E-07	4.038239
11112011	20	0.069	0.117	0.015	0.001	0.002	0.003	0.007	0.023	0.025	0.025	0.020	279.842	0.466	0.5612692	0.4207846	0.3090251E-07	4.134066
11112011	21	0.053	0.134	0.015	0.001	0.002	0.003	0.007	0.023	0.035	0.035	0.020	279.100	0.510	0.6662109	0.7725141	0.9546332E-07	3.908070
11112011	22	0.038	0.148	0.017	0.001	0.002	0.002	0.006	0.021	0.041	0.041	0.020	278.398	0.549	0.6965961	1.140078	0.2490706E-06	3.660612
11112011	23	0.021	0.158	0.024	0.001	0.002	0.002	0.005	0.017	0.045	0.045	0.019	277.681	0.590	0.6462539	1.598126	0.9014938E-06	3.248648
11112011	24	0.013	0.169	0.029	0.001	0.002	0.002	0.005	0.015	0.048	0.047	0.019	276.924	0.635	0.6360463	2.431089	0.3276678E-05	2.870367
11122011	01	0.006	0.179	0.041	0.001	0.001	0.002	0.004	0.013	0.050	0.047	0.019	276.177	0.684	0.5345930	3.165279	0.1160660E-04	2.435707
11122011	02	0.003	0.189	0.052	0.001	0.001	0.002	0.004	0.012	0.050	0.045	0.018	275.561	0.724	0.4784852	3.750095	0.2343142E-04	2.204244
11122011	03	0.002	0.201	0.056	0.001	0.001	0.001	0.004	0.011	0.051	0.046	0.018	275.104	0.750	0.4272864	4.209233	0.4437067E-04	1.977107
11122011	04	0.001	0.216	0.056	0.001	0.001	0.001	0.004	0.011	0.052	0.048	0.018	274.736	0.768	0.4233956	4.714959	0.5982583E-04	1.896589
11122011	05	0.002	0.233	0.061	0.001	0.001	0.001	0.004	0.011	0.052	0.044	0.019	274.398	0.785	0.4139352	5.389791	0.8914396E-04	1.781480
11122011	06	0.001	0.252	0.057	0.001	0.001	0.001	0.004	0.011	0.055	0.047	0.019	274.080	0.801	0.4381341	5.932158	0.1010352E-03	1.768740
11122011	07	0.001	0.271	0.051	0.001	0.002	0.001	0.004	0.011	0.061	0.052	0.019	273.791	0.816	0.5104417	7.573941	0.1249640E-03	1.782537
11122011	08	0.002	0.288	0.043	0.001	0.002	0.002	0.004	0.012	0.068	0.060	0.020	274.420	0.777	0.5958505	6.745384	0.6097816E-04	2.043832
11122011	09	0.004	0.300	0.035	0.001	0.002	0.002	0.004	0.013	0.074	0.067	0.021	276.939	0.670	0.6265496	4.087998	0.1243325E-04	2.516926
11122011	10	0.011	0.313	0.036	0.001	0.002	0.002	0.005	0.013	0.071	0.062	0.022	280.580	0.539	0.5169146	2.054726	0.2883075E-05	2.852898
11122011	11	0.024	0.332	0.046	0.001	0.002	0.002	0.005	0.014	0.062	0.051	0.024	284.188	0.439	0.2712819	0.9868400	0.1936337E-05	2.707266
11122011	12	0.029	0.384	0.067	0.000	0.002	0.002	0.005	0.013	0.054	0.030	0.030	287.307	0.362	NaN	1.297182	0.3687546E-01	-1.453737
11122011	13	0.031	0.410	0.090	0.000	0.002	0.002	0.004	0.011	0.046	0.006	0.036	289.769	0.305	NaN	1.159317	0.5899365E-01	-1.706603
11122011	14	0.022	0.353	0.084	0.000	0.002	0.002	0.004	0.010	0.049	0.003	0.037	290.623	0.287	NaN	1.069874	0.5999734E-01	-1.748799
11122011	15	0.018	0.297	0.080	0.000	0.002	0.001	0.004	0.009	0.051	0.002	0.037	290.135	0.298	NaN	1.071010	0.6099835E-01	-1.755524
11122011	16	0.018	0.259	0.073	0.000	0.002	0.001	0.003	0.009	0.050	0.002	0.037	289.148	0.319	NaN	1.167511	0.5599351E-01	-1.680876
11122011	17	0.022	0.237	0.063	0.000	0.002	0.001	0.004	0.009	0.048	0.003	0.036	287.679	0.346	NaN	1.302339	0.4193953E-01	-1.507899
11122011	18	0.043	0.215	0.042	0.001	0.002	0.002	0.005	0.012	0.040	0.004	0.035	285.980	0.379	0.1402935	1.129487	0.3390359E-04	1.522636
11122011	19	0.074	0.196	0.027	0.001	0.002	0.003	0.006	0.017	0.030	0.010	0.034	284.476	0.422	0.3078570	1.084323	0.6350897E-05	2.232323
11122011	20	0.084	0.176	0.021	0.001	0.003	0.003	0.008	0.022	0.024	0.019	0.032	283.404	0.463	0.4240573	0.9177828	0.8646988E-06	3.025875
11122011	21	0.078	0.161	0.021	0.001	0.003	0.004	0.009	0.024	0.020	0.020	0.031	282.747	0.497	0.4150052	0.7398844	0.4555055E-06	3.210670
11122011	22	0.061	0.151	0.022	0.001	0.003	0.004	0.009	0.024	0.020	0.020	0.030	282.133	0.520	0.3810623	0.6544579	0.4540418E-06	3.158786
11122011	23	0.046	0.141	0.022	0.002	0.003	0.004	0.009	0.022	0.018	0.018	0.029	281.658	0.535	0.3916737	0.8506058	0.7925098E-06	3.030724
11122011	24	0.034	0.132	0.022	0.002	0.003	0.003	0.008	0.020	0.017	0.017	0.027	280.852	0.566	0.4091740	1.033370	0.1210495E-05	2.931293
11132011	01	0.025	0.121	0.022	0.002	0.003	0.003	0.008	0.019	0.017	0.018	0.026	280.156	0.597	0.4097294	1.185094	0.1741883E-05	2.832734
11132011	02	0.020	0.108	0.022	0.002	0.003	0.003	0.008	0.018	0.018	0.018	0.025	279.592	0.621	0.4215496	1.307700	0.2171696E-05	2.779709
11132011	03	0.018	0.097	0.022	0.001	0.003	0.003	0.007	0.017	0.017	0.017	0.024	279.346	0.638	0.4304116	1.458184	0.2782695E-05	2.719347
11132011	04	0.017	0.088	0.021	0.001	0.003	0.002	0.007	0.017	0.015	0.015	0.023	279.279	0.643	0.3850646	1.168948	0.2290724E-05	2.707822
11132011	05	0.018	0.081	0.020	0.001	0.003	0.002	0.007	0.016	0.014	0.014	0.021	279.160	0.659	0.3831845	1.064600	0.1952606E-05	2.736572
11132011	06	0.022	0.079	0.020	0.001	0.003	0.002	0.007	0.017	0.013	0.013	0.021	279.207	0.658	0.3718845	0.8914350	0.1113914E-05	2.903238
11132011	07	0.028	0.082	0.019	0.001	0.003	0.003	0.008	0.019	0.012	0.012	0.020	279.194	0.673	0.3499297	0.6110482	0.4878003E-06	3.097833
11132011	08	0.032	0.088	0.016	0.001	0.003	0.003	0.009	0.021	0.013	0.013	0.020	279.398	0.698	0.3960783	0.6578391	0.5285410E-06	3.095041
11132011	09	0.035	0.094	0.019	0.001	0.004	0.004	0.009	0.024	0.016	0.016	0.021	282.392	0.621	0.5752075E-01	0.7847603E-01	0.4054849E-07	3.286762
11132011	10	0.037	0.093	0.026	0.001	0.004	0.004	0.009	0.023	0.011	0.011	0.022	285.902	0.537	0.3044009E-03	0.3019612E-03	0.1522704E-09	3.297336
11132011	11	0.030	0.104	0.038	0.001	0.003	0.002	0.006	0.015	0.010	0.006	0.023	288.451	0.493	0.6013715E-01	0.5895557	0.3587268E-05	2.215761
11132011	12	0.017	0.134	0.043	0.001	0.002	0.002	0.005	0.011	0.020	0.003	0.025	290.116	0.475	0.2111197E-01	0.9042460	0.5719015E-04	1.198965
11132011	13	0.007	0.097	0.045	0.001	0.002	0.002	0.004	0.009	0.028	0.002	0.025	291.604	0.457	0.9770036E-02	0.9763509	0.1463540E-03	0.8242012
11132011	14	0.003	0.077	0.047	0.001	0.002	0.001	0.004	0.008	0.031	0.001	0.025	292.392	0.459	0.6920099E-04	1.893683	0.2886874E-02	-0.1831204
11132011	15	0.005	0.073	0.046	0.001	0.002	0.001	0.003	0.008	0.030	0.001	0.025	292.248	0.484	0.7987022E-04	2.030533	0.2900273E-02	-0.1548289
11132011	16	0.010	0.064	0.038	0.001	0.002	0.001	0.003	0.007	0.025	0.001	0.023	291.721	0.519	0.8661270E-02	1.119172	0.2327856E-03	0.6819405
11132011	17	0.016	0.058	0.027	0.001	0.002	0.001	0.003	0.008	0.023	0.001	0.023	290.737	0.561	0.1892042E-01	1.189325	0.1199012E-03	0.9964769
11132011	18	0.049	0.064	0.018	0.001	0.002	0.002	0.005	0.014	0.012	0.002	0.024	289.348	0.617	0.9523886E-01	1.053811	0.7777612E-05	2.131917
11132011	19	0.067	0.074	0.018	0.001	0.003	0.004	0.008	0.022	0.002	0.003	0.026	287.930	0.698	0.1356857	0.5214873	0.2971194E-06	3.244313
11132011	20	0.056	0.076	0.015	0.002	0.003	0.005	0.009	0.026	0.002	0.002	0.027	287.194	0.755	0.5725586E-01	0.2058645	0.1377427E-06	3.174513
11132011	21	0.041	0.081	0.012	0.003	0.003	0.004	0.008	0.024	0.004	0.004	0.028	286.770	0.778	0.1873803	0.8536909	0.6448192E-06	3.121863
11132011	22	0.031	0.099	0.009	0.004	0.003	0.004	0.008	0.022	0.007	0.006	0.031	286.396	0.793	0.3763738	2.274558	0.2633141E-05	2.936423
11132011	23	0.021	0.116	0.011	0.004	0.003	0.003	0.007	0.018	0.017	0.005	0.033	286.042	0.803	0.2449959	3.139288	0.2203977E-04	2.153624
11132011	24	0.019	0.114	0.013	0.003	0.003	0.003	0.007	0.016	0.023	0.004	0.034	287.002	0.720	0.1482916	2.559388	0.3861331E-04	1.821399
11142011	01	0.019	0.086	0.013	0.004	0.003	0.002	0.006	0.016	0.022	0.003	0.033	286.218	0.766	0.1725526	2.901052	0.4417148E-04	1.817414
11142011	02	0.017	0.062	0.013	0.003	0.003	0.002	0.006	0.016	0.020	0.004	0.032	285.631	0.792	0.1835763E-02	8.604537	0.2587543E-02	0.5218400
11142011	03	0.017	0.049	0.012	0.003	0.003	0.002	0.007	0.017	0.018	0.005	0.030	284.959	0.829	0.2925988	3.318158	0.1993603E-04	2.221258
11142011	04	0.016	0.041	0.011	0.003	0.003	0.002	0.007	0.017	0.017	0.007	0.029	284.587	0.851	0.3343081	3.686534	0.1809774E-04	2.308994
11142011	05	0.019	0.039	0.010	0.003	0.003	0.002	0.008	0.019	0.014	0.009	0.028	284.473	0.856	0.4413462	3.665687	0.8114648E-05	2.654886
11142011	06	0.026	0.043	0.009	0.004	0.004	0.003	0.008	0.020	0.013	0.011	0.028	284.446	0.860	0.5379260	3.959333	0.5653959E-05	2.845269
11142011	07	0.037	0.055	0.011	0.003	0.004	0.004	0.009	0.024	0.012	0.011	0.028	284.493	0.859	0.4717793	2.728748	0.3038366E-05	2.953323
11142011	08	0.050	0.055	0.013	0.002	0.004	0.005	0.011	0.030	0.006	0.007	0.028	285.238	0.820	0.9971857E-04	0.2389451E-03	0.4769372E-09	2.699837
11142011	09	0.047	0.049	0.012	0.002	0.004	0.006	0.012	0.035	0.004	0.007	0.028	287.951	0.744	0.2407147	0.4238779	0.1683403E-06	3.401053
11142011	10	0.033	0.042	0.014	0.002	0.004	0.005	0.012	0.035	0.003	0.007	0.028	290.907	0.674	0.000000	0.3172983E-08	0.1000165E-13	2.501396
11142011	11	0.023	0.088	0.023	0.003	0.003	0.004	0.009	0.026	0.005	0.004	0.028	293.505	0.607	0.8637249E-02	0.1053114	0.7185634E-07	3.166010
11142011	12	0.003	0.134	0.025	0.003	0.002	0.002	0.004	0.011	0.020	0.002	0.024	295.328	0.568	0.6365776E-04	2.199119	0.3027253E-02	-0.1387999
11142011	13	0.002	0.112	0.032	0.002	0.002	0.001	0.003	0.007	0.021	0.001	0.022	296.971	0.527	0.1180172E-04	1.081361	0.2347078E-02	-0.3365569
11142011	14	0.001	0.094	0.036	0.001	0.002	0.001	0.002	0.005	0.020	0.001	0.021	297.563	0.515	0.000000	0.9807262	0.3675679E-02	-0.5737898
11142011	15	0.001	0.073	0.030	0.001	0.002	0.001	0.002	0.004	0.021	0.001	0.020	297.147	0.525	0.000000	1.044828	0.3347448E-02	-0.5056689
11142011	16	0.002	0.073	0.026	0.001	0.002	0.001	0.002	0.005	0.024	0.001	0.021	296.288	0.548	0.2163649E-04	1.241798	0.2420816E-02	-0.2899109
11142011	17	0.020	0.073	0.020	0.001	0.002	0.002	0.003	0.009	0.020	0.001	0.023	294.654	0.589	0.1134527E-01	1.270273	0.8674070E-04	1.165674
11142011	18	0.059	0.078	0.015	0.001	0.003	0.004	0.006	0.021	0.002	0.001	0.024	292.758	0.635	0.3398907E-01	0.2035361	0.8075929E-07	3.401449
11142011	19	0.063	0.086	0.015	0.002	0.003	0.004	0.008	0.029	0.001	0.002	0.025	291.810	0.667	0.000000	0.5000693E-08	0.1000037E-13	2.699014
11142011	20	0.041	0.068	0.011	0.003	0.003	0.004	0.007	0.026	0.001	0.002	0.024	291.155	0.702	0.000000	0.3081048E-08	0.1971884E-18	7.193817
11142011	21	0.031	0.050	0.010	0.003	0.003	0.003	0.006	0.021	0.001	0.002	0.022	290.900	0.721	0.1701689E-01	0.1156151	0.7662672E-07	3.178634
11142011	22	0.025	0.033	0.010	0.003	0.003	0.003	0.006	0.017	0.001	0.002	0.020	290.730	0.739	0.4920679E-01	0.3841547	0.2983775E-06	3.109740
11142011	23	0.020	0.033	0.010	0.004	0.003	0.002	0.006	0.016	0.002	0.003	0.020	290.615	0.756	0.7090485E-01	0.6345641	0.1144598E-05	2.743823
11142011	24	0.016	0.041	0.011	0.004	0.003	0.002	0.006	0.014	0.004	0.003	0.021	290.377	0.777	0.1003352	1.335403	0.3805576E-05	2.545192
11152011	01	0.012	0.053	0.012	0.003	0.003	0.002	0.005	0.012	0.012	0.002	0.023	289.805	0.824	0.6575298E-01	2.253834	0.3312743E-04	1.832734
11152011	02	0.011	0.060	0.010	0.003	0.003	0.001	0.005	0.011	0.015	0.002	0.023	289.186	0.864	0.7776737E-01	3.006947	0.5515183E-04	1.736566
11152011	03	0.013	0.046	0.009	0.003	0.003	0.001	0.005	0.012	0.013	0.002	0.023	288.684	0.902	0.1409419	3.978189	0.3848876E-04	2.014351
11152011	04	0.013	0.032	0.009	0.003	0.003	0.001	0.005	0.012	0.010	0.003	0.021	288.401	0.929	0.2259434	5.272375	0.2830725E-04	2.270109
11152011	05	0.015	0.036	0.008	0.003	0.003	0.001	0.005	0.012	0.009	0.005	0.020	288.245	0.941	0.3147902	6.376537	0.2373710E-04	2.429157
11152011	06	0.020	0.056	0.007	0.004	0.004	0.002	0.005	0.014	0.009	0.007	0.019	288.148	0.956	0.6197905	11.80235	0.2106992E-04	2.748306
11152011	07	0.027	0.084	0.006	0.005	0.004	0.003	0.006	0.017	0.009	0.007	0.020	288.097	0.963	0.6236887	10.32786	0.1636307E-04	2.800146
11152011	08	0.036	0.110	0.008	0.004	0.004	0.004	0.007	0.021	0.005	0.004	0.021	288.967	0.916	0.4696846E-04	0.2194881E-03	0.9936528E-09	2.344176
11152011	09	0.035	0.123	0.011	0.003	0.004	0.004	0.007	0.024	0.002	0.002	0.020	290.925	0.893	0.000000	0.1403118E-08	0.1003372E-18	7.145632
11152011	10	0.023	0.109	0.016	0.003	0.003	0.003	0.006	0.021	0.001	0.002	0.020	293.515	0.805	0.000000	0.7667596E-09	0.1000003E-13	1.884658
11152011	11	0.010	0.111	0.022	0.003	0.003	0.002	0.003	0.011	0.009	0.002	0.019	295.259	0.744	0.1089454E-01	1.216766	0.3162693E-04	1.585150
11152011	12	0.001	0.104	0.028	0.001	0.002	0.001	0.002	0.005	0.015	0.001	0.019	296.509	0.697	0.000000	1.550405	0.2526492E-02	-0.2120728
11152011	13	0.000	0.078	0.037	0.001	0.002	0.001	0.002	0.005	0.016	0.001	0.022	296.921	0.662	0.000000	1.683426	0.1803018E-02	-0.2980624E-01
11152011	14	0.001	0.054	0.036	0.001	0.002	0.001	0.002	0.006	0.020	0.001	0.024	296.418	0.673	0.000000	1.771844	0.3197135E-02	-0.2563355
11152011	15	0.003	0.044	0.027	0.001	0.002	0.001	0.002	0.008	0.026	0.000	0.024	295.685	0.713	0.7271767E-04	2.724130	0.2927295E-02	-0.3123873E-01
11152011	16	0.008	0.044	0.020	0.001	0.002	0.001	0.002	0.009	0.027	0.001	0.025	295.248	0.754	0.2714992E-03	4.802533	0.3706173E-02	0.1125446
11152011	17	0.038	0.049	0.016	0.001	0.002	0.003	0.004	0.014	0.014	0.001	0.025	294.043	0.806	0.7324475E-01	2.224770	0.1397922E-04	2.201802
11152011	18	0.091	0.080	0.013	0.001	0.003	0.005	0.007	0.029	0.001	0.001	0.026	292.593	0.867	0.1218915E-03	0.3110161E-03	0.1116788E-08	2.444812
11152011	19	0.104	0.109	0.011	0.001	0.003	0.005	0.008	0.034	0.003	0.003	0.026	291.583	0.917	0.2379417E-03	0.1115240E-02	0.2715866E-08	2.613460
11152011	20	0.100	0.126	0.007	0.002	0.003	0.005	0.008	0.036	0.005	0.005	0.026	290.896	0.942	0.2047834	1.235692	0.2478829E-05	2.697664
11152011	21	0.080	0.127	0.010	0.002	0.003	0.004	0.008	0.032	0.005	0.004	0.024	290.354	0.951	0.4126774	3.564363	0.7790840E-05	2.660398
11152011	22	0.063	0.128	0.012	0.002	0.003	0.004	0.007	0.028	0.005	0.005	0.022	290.005	0.920	0.1185536E-03	0.6937981E-03	0.2180960E-08	2.502585
11152011	23	0.044	0.131	0.016	0.002	0.003	0.003	0.007	0.024	0.006	0.006	0.020	289.681	0.949	0.3682633	4.794108	0.1835049E-04	2.417060
11152011	24	0.025	0.129	0.022	0.002	0.003	0.003	0.007	0.023	0.007	0.007	0.019	289.531	0.938	0.9799123E-01	1.331554	0.7975662E-05	2.222592
11162011	01	0.018	0.110	0.021	0.003	0.003	0.003	0.008	0.024	0.006	0.011	0.018	289.368	0.958	0.3722271	9.155264	0.6337886E-04	2.159726
11162011	02	0.014	0.072	0.000	0.008	0.004	0.003	0.008	0.025	0.003	0.028	0.018	289.784	0.963	NaN	22.78186	0.2933653E-04	2.890180
11162011	03	0.008	0.037	0.011	0.003	0.004	0.003	0.008	0.022	0.003	0.009	0.017	290.143	0.958	0.2632677	4.298852	0.2032279E-04	2.325369
11162011	04	0.008	0.022	0.006	0.003	0.004	0.002	0.007	0.018	0.002	0.005	0.015	290.406	0.958	0.3636364	3.576993	0.8776291E-05	2.610207
11162011	05	0.012	0.020	0.006	0.002	0.004	0.002	0.005	0.014	0.001	0.001	0.013	290.424	0.967	0.1459718E-03	0.1188100E-02	0.1096848E-07	2.034706
11162011	06	0.019	0.028	0.005	0.002	0.003	0.001	0.004	0.011	0.002	0.002	0.012	290.345	0.970	0.2518069	3.260356	0.5562355E-05	2.768006
11162011	07	0.011	0.027	0.005	0.010	0.002	0.001	0.002	0.007	0.021	0.002	0.015	290.316	0.970	0.4668435	15.63652	0.4952062E-04	2.499354
11162011	08	0.007	0.020	0.005	0.006	0.002	0.002	0.001	0.002	0.036	0.001	0.019	290.539	0.965	0.4482195	22.95951	0.1197539E-03	2.282673
11162011	09	0.010	0.024	0.006	0.005	0.001	0.002	0.001	0.001	0.041	0.002	0.021	291.654	0.962	0.3269027	18.64514	0.1291560E-03	2.159451
11162011	10	0.009	0.041	0.010	0.002	0.001	0.001	0.000	0.000	0.031	0.001	0.019	293.868	0.906	0.5495024E-01	6.892669	0.2116810E-03	1.512706
11162011	11	0.000	0.057	0.013	0.000	0.001	0.000	0.000	0.000	0.017	0.000	0.019	294.779	0.885	0.000000	5.952757	0.6077660E-02	-0.9018249E-02
11162011	12	0.000	0.041	0.020	0.000	0.001	0.000	0.000	0.000	0.020	0.000	0.023	294.747	0.873	0.000000	6.263464	0.7361719E-02	-0.7016464E-01
11162011	13	0.000	0.034	0.021	0.000	0.001	0.000	0.000	0.000	0.019	0.000	0.022	295.254	0.879	0.000000	6.460008	0.7203393E-02	-0.4730403E-01
11162011	14	0.000	0.023	0.015	0.000	0.001	0.000	0.000	0.000	0.013	0.000	0.019	294.785	0.893	0.000000	6.403155	0.8537199E-02	-0.1249214
11162011	15	0.000	0.020	0.013	0.000	0.000	0.000	0.000	0.000	0.014	0.000	0.017	294.644	0.894	0.8364320E-03	5.536576	0.6384138E-02	-0.6186100E-01
11162011	16	0.000	0.026	0.012	0.000	0.000	0.000	0.000	0.000	0.015	0.000	0.017	293.965	0.904	0.1234353E-02	5.917624	0.5938560E-02	-0.1533828E-02
11162011	17	0.002	0.038	0.011	0.000	0.000	0.001	0.000	0.000	0.024	0.000	0.018	292.797	0.922	0.1122648E-01	7.027167	0.3440067E-02	0.3102133
11162011	18	0.003	0.059	0.009	0.000	0.000	0.001	0.000	0.000	0.029	0.000	0.019	291.355	0.933	0.3688878E-01	8.645931	0.3036224E-02	0.4544779
11162011	19	0.024	0.068	0.009	0.001	0.001	0.001	0.000	0.000	0.041	0.003	0.022	290.309	0.930	0.3032560	11.53922	0.9561555E-04	2.081648
11162011	20	0.048	0.074	0.008	0.002	0.001	0.001	0.001	0.001	0.045	0.008	0.021	289.447	0.931	0.5921658	13.17278	0.3595830E-04	2.563878
11162011	21	0.051	0.068	0.008	0.002	0.001	0.001	0.001	0.001	0.046	0.011	0.019	288.763	0.926	0.6612676	13.47999	0.2911121E-04	2.665629
11162011	22	0.047	0.054	0.009	0.002	0.001	0.001	0.001	0.001	0.043	0.013	0.017	288.146	0.933	0.6714264	13.38951	0.2877469E-04	2.667754
11162011	23	0.035	0.038	0.009	0.002	0.001	0.001	0.001	0.001	0.041	0.013	0.016	287.442	0.941	0.6856002	15.37510	0.3620407E-04	2.628061
11162011	24	0.024	0.027	0.009	0.001	0.001	0.001	0.001	0.001	0.041	0.015	0.015	286.655	0.950	0.7105754	18.80858	0.5013627E-04	2.574204
11172011	01	0.016	0.022	0.010	0.001	0.001	0.001	0.002	0.001	0.041	0.016	0.015	285.832	0.953	0.6767392	19.05392	0.6653028E-04	2.456965
11172011	02	0.014	0.024	0.013	0.001	0.001	0.000	0.002	0.001	0.032	0.011	0.013	285.402	0.909	0.3807884	6.924460	0.4507523E-04	2.186448
11172011	03	0.014	0.025	0.016	0.001	0.001	0.000	0.001	0.000	0.019	0.006	0.009	284.720	0.904	0.2388401	4.237514	0.4244122E-04	1.999323
11172011	04	0.012	0.024	0.015	0.001	0.001	0.000	0.001	0.000	0.018	0.006	0.008	284.024	0.907	0.2653747	4.467935	0.3972485E-04	2.051045
11172011	05	0.010	0.025	0.014	0.003	0.002	0.000	0.001	0.002	0.033	0.010	0.015	283.317	0.907	0.4044006	7.619975	0.6563033E-04	2.064849
11172011	06	0.008	0.029	0.015	0.006	0.002	0.001	0.003	0.005	0.056	0.017	0.028	282.759	0.889	0.4720525	10.55738	0.1154603E-03	1.961123
11172011	07	0.008	0.033	0.017	0.008	0.003	0.001	0.004	0.008	0.063	0.023	0.034	282.115	0.880	0.4783185	11.37253	0.1458523E-03	1.891944
11172011	08	0.009	0.036	0.018	0.009	0.003	0.002	0.005	0.009	0.064	0.026	0.035	281.675	0.850	0.5055099	9.585971	0.1046078E-03	1.962072
11172011	09	0.010	0.041	0.024	0.005	0.003	0.002	0.006	0.010	0.059	0.026	0.033	282.337	0.800	0.4559765	6.438979	0.6190069E-04	2.017122
11172011	10	0.014	0.048	0.031	0.004	0.003	0.002	0.006	0.010	0.048	0.026	0.026	283.182	0.741	0.4033580	3.910158	0.2319751E-04	2.226753
11172011	11	0.022	0.051	0.035	0.003	0.003	0.001	0.006	0.011	0.031	0.023	0.020	284.039	0.683	0.2958843	1.911634	0.6658641E-05	2.458019
11172011	12	0.025	0.051	0.040	0.002	0.002	0.001	0.005	0.010	0.015	0.013	0.016	285.232	0.551	0.9750986E-01	0.5801665	0.2771838E-05	2.320785
11172011	13	0.023	0.038	0.040	0.001	0.002	0.001	0.004	0.008	0.008	0.005	0.013	286.231	0.458	0.4337072E-01	0.3246474	0.2669714E-05	2.084947
11172011	14	0.020	0.037	0.036	0.001	0.002	0.001	0.003	0.006	0.005	0.003	0.010	285.993	0.426	0.3668851E-01	0.2555795	0.1977810E-05	2.111341
11172011	15	0.023	0.039	0.034	0.001	0.002	0.001	0.003	0.006	0.004	0.003	0.010	285.171	0.419	0.4539979E-01	0.2517144	0.1751024E-05	2.157616
11172011	16	0.025	0.040	0.030	0.001	0.002	0.001	0.002	0.006	0.004	0.003	0.009	284.208	0.415	0.6359732E-01	0.2269607	0.8269666E-06	2.438463
11172011	17	0.026	0.040	0.024	0.001	0.001	0.001	0.002	0.006	0.003	0.003	0.009	282.837	0.413	0.5889225E-01	0.1953445	0.9866975E-06	2.296617
11172011	18	0.030	0.042	0.019	0.001	0.001	0.001	0.002	0.006	0.002	0.002	0.009	281.569	0.407	0.8752447E-01	0.1988283	0.7959308E-06	2.397603
11172011	19	0.038	0.048	0.017	0.001	0.002	0.001	0.003	0.009	0.002	0.002	0.009	280.809	0.396	0.7152557E-06	0.1400877E-06	0.1000010E-13	4.146396
11172011	20	0.040	0.052	0.013	0.001	0.002	0.001	0.003	0.010	0.005	0.005	0.010	280.032	0.398	0.8344650E-06	0.1788639E-06	0.5327227E-17	7.526021
11172011	21	0.039	0.052	0.015	0.001	0.002	0.001	0.003	0.010	0.004	0.004	0.010	279.356	0.417	0.4768372E-06	0.1504961E-06	0.4447330E-17	7.529426
11172011	22	0.036	0.053	0.017	0.001	0.002	0.001	0.003	0.009	0.003	0.003	0.010	278.645	0.445	0.6803519E-01	0.3672444E-01	0.2449556E-07	3.175868
11172011	23	0.027	0.055	0.016	0.001	0.001	0.001	0.003	0.007	0.006	0.006	0.010	277.889	0.478	0.2621297	0.3061960	0.3645609E-06	2.924229
11172011	24	0.020	0.059	0.016	0.001	0.001	0.001	0.003	0.007	0.010	0.007	0.011	277.074	0.516	0.3176818	0.4640085	0.1002221E-05	2.665563
11182011	01	0.013	0.059	0.017	0.001	0.001	0.001	0.002	0.006	0.013	0.008	0.011	276.254	0.559	0.3226873	0.6603904	0.3071773E-05	2.332412
11182011	02	0.010	0.055	0.017	0.001	0.001	0.001	0.002	0.005	0.015	0.009	0.011	275.561	0.597	0.3400751	0.8745993	0.5946114E-05	2.167576
11182011	03	0.008	0.047	0.017	0.001	0.001	0.001	0.002	0.005	0.015	0.009	0.010	275.099	0.625	0.3642797	0.9060854	0.4630402E-05	2.291550
11182011	04	0.007	0.039	0.017	0.001	0.001	0.001	0.002	0.005	0.016	0.011	0.010	274.712	0.650	0.3817723	1.030407	0.5352209E-05	2.284476
11182011	05	0.007	0.033	0.017	0.001	0.001	0.001	0.002	0.006	0.017	0.015	0.010	274.338	0.677	0.4408620	1.224251	0.4400883E-05	2.444330
11182011	06	0.008	0.032	0.015	0.001	0.001	0.001	0.003	0.007	0.022	0.021	0.009	273.960	0.704	0.5878899	1.424266	0.2291390E-05	2.793492
11182011	07	0.008	0.034	0.014	0.001	0.001	0.001	0.003	0.008	0.032	0.031	0.010	273.590	0.732	0.7020696	2.354479	0.4141589E-05	2.754728
11182011	08	0.008	0.036	0.014	0.002	0.002	0.002	0.004	0.010	0.042	0.041	0.010	273.874	0.714	0.7320125	2.453144	0.3370955E-05	2.861970
11182011	09	0.009	0.037	0.018	0.001	0.002	0.002	0.004	0.011	0.045	0.044	0.011	275.781	0.633	0.6588684	1.669596	0.1292465E-05	3.111193
11182011	10	0.013	0.037	0.025	0.001	0.002	0.002	0.004	0.011	0.038	0.038	0.011	278.447	0.532	0.4678468	0.7526773	0.2532778E-06	3.473012
11182011	11	0.020	0.037	0.033	0.000	0.002	0.002	0.004	0.011	0.028	0.029	0.012	281.021	0.446	NaN	0.8113610	0.1397320E-01	-1.236082
11182011	12	0.030	0.037	0.042	0.000	0.002	0.001	0.004	0.010	0.016	0.016	0.012	283.280	0.377	NaN	0.5031225	0.1198476E-01	-1.376956
11182011	13	0.034	0.035	0.046	0.000	0.001	0.001	0.003	0.009	0.008	0.008	0.012	284.962	0.328	NaN	0.4352511	0.1198753E-01	-1.439990
11182011	14	0.036	0.032	0.044	0.000	0.001	0.001	0.003	0.008	0.009	0.006	0.012	285.537	0.312	NaN	0.4274789	0.6968773E-02	-1.212242
11182011	15	0.039	0.028	0.041	0.000	0.001	0.001	0.003	0.008	0.010	0.006	0.013	285.135	0.318	NaN	0.5022102	0.1938144E-02	-0.5865004
11182011	16	0.042	0.026	0.036	0.000	0.001	0.001	0.003	0.007	0.011	0.006	0.013	284.343	0.333	NaN	0.5470116	0.1669729E-05	2.515351
11182011	17	0.046	0.024	0.030	0.000	0.001	0.001	0.003	0.008	0.011	0.007	0.013	283.063	0.356	NaN	0.5585188	0.6870589E-06	2.910044
11182011	18	0.057	0.026	0.023	0.000	0.001	0.002	0.004	0.010	0.009	0.008	0.013	281.769	0.382	NaN	0.4300211	0.1215834E-06	3.548615
11182011	19	0.069	0.033	0.015	0.001	0.002	0.002	0.005	0.015	0.012	0.012	0.014	280.943	0.410	0.3677732E-01	0.1292804E-01	0.5318418E-09	4.385750
11182011	20	0.069	0.034	0.013	0.001	0.002	0.002	0.005	0.017	0.016	0.016	0.014	280.444	0.427	0.2520776	0.1082036	0.5314997E-08	4.308739
11182011	21	0.063	0.033	0.013	0.001	0.002	0.002	0.005	0.016	0.018	0.018	0.014	280.067	0.434	0.3161309	0.1450656	0.7318522E-08	4.297141
11182011	22	0.057	0.031	0.013	0.001	0.002	0.002	0.005	0.015	0.017	0.017	0.014	279.758	0.438	0.3102807	0.1464902	0.8632976E-08	4.229648
11182011	23	0.052	0.031	0.018	0.001	0.002	0.002	0.005	0.014	0.011	0.011	0.015	279.468	0.441	0.1204699	0.6786859E-01	0.2128438E-07	3.503608
11182011	24	0.043	0.034	0.020	0.001	0.002	0.002	0.005	0.012	0.010	0.010	0.015	279.186	0.445	0.2443388	0.2034031	0.1402832E-06	3.161352
11192011	01	0.033	0.040	0.019	0.002	0.002	0.001	0.004	0.010	0.016	0.014	0.016	278.919	0.448	0.3569496	0.5386146	0.1038354E-05	2.714933
11192011	02	0.026	0.049	0.020	0.002	0.002	0.001	0.004	0.009	0.022	0.015	0.017	278.771	0.452	0.3594640	0.6629282	0.2294026E-05	2.460868
11192011	03	0.024	0.060	0.021	0.002	0.002	0.001	0.004	0.009	0.026	0.016	0.018	278.783	0.455	0.3781912	0.7713365	0.3000733E-05	2.410017
11192011	04	0.025	0.070	0.021	0.002	0.002	0.001	0.004	0.009	0.029	0.018	0.018	278.858	0.454	0.3999839	0.7691655	0.2484421E-05	2.490794
11192011	05	0.027	0.078	0.020	0.002	0.002	0.001	0.004	0.009	0.030	0.019	0.019	278.989	0.451	0.4114094	0.8323565	0.3043816E-05	2.436891
11192011	06	0.030	0.086	0.019	0.001	0.002	0.001	0.004	0.009	0.030	0.019	0.019	279.180	0.447	0.4232465	0.8301314	0.2842618E-05	2.465428
11192011	07	0.036	0.094	0.017	0.001	0.002	0.001	0.005	0.010	0.028	0.019	0.019	279.385	0.444	0.4320109	0.7156967	0.1702807E-05	2.623564
11192011	08	0.043	0.101	0.016	0.001	0.002	0.002	0.005	0.012	0.025	0.019	0.020	279.831	0.453	0.4525397	0.7464582	0.1073458E-05	2.842221
11192011	09	0.046	0.108	0.018	0.002	0.002	0.002	0.005	0.013	0.023	0.019	0.020	281.500	0.455	0.3453759	0.6675891	0.9161059E-06	2.862564
11192011	10	0.030	0.093	0.026	0.002	0.002	0.002	0.005	0.010	0.022	0.012	0.021	283.781	0.461	0.1599991	0.7742715	0.7501970E-05	2.013718
11192011	11	0.021	0.102	0.028	0.002	0.002	0.001	0.004	0.009	0.022	0.007	0.021	285.583	0.461	0.6747884E-01	0.7323831	0.2701769E-04	1.433090
11192011	12	0.020	0.102	0.029	0.001	0.002	0.001	0.004	0.009	0.021	0.005	0.022	286.938	0.466	0.4502225E-01	0.7982228	0.4382844E-04	1.260368
11192011	13	0.019	0.088	0.028	0.001	0.002	0.001	0.004	0.009	0.018	0.002	0.021	287.867	0.479	0.3179079E-01	0.7504807	0.4645417E-04	1.208315
11192011	14	0.013	0.078	0.023	0.002	0.002	0.001	0.003	0.007	0.018	0.001	0.020	288.166	0.494	0.1888412E-01	0.8457232	0.1071004E-03	0.8974370
11192011	15	0.013	0.076	0.022	0.002	0.002	0.001	0.003	0.006	0.018	0.001	0.019	287.920	0.508	0.2144432E-01	0.8967711	0.1032623E-03	0.9387396
11192011	16	0.015	0.080	0.020	0.002	0.002	0.001	0.003	0.007	0.019	0.001	0.020	287.386	0.523	0.3158057E-01	0.9285005	0.7743714E-04	1.078833
11192011	17	0.019	0.088	0.017	0.001	0.002	0.001	0.003	0.007	0.019	0.001	0.021	286.451	0.541	0.5072355E-01	1.062785	0.6862763E-04	1.189947
11192011	18	0.026	0.096	0.014	0.001	0.002	0.002	0.004	0.010	0.015	0.001	0.022	285.478	0.562	0.1051211	1.036622	0.2088578E-04	1.695770
11192011	19	0.031	0.063	0.012	0.002	0.003	0.002	0.005	0.013	0.011	0.003	0.023	285.093	0.581	0.1535688	0.9644563	0.8033377E-05	2.079384
11192011	20	0.030	0.045	0.012	0.003	0.003	0.002	0.006	0.015	0.008	0.004	0.023	285.501	0.577	0.1559375	0.7929194	0.2974541E-05	2.425809
11192011	21	0.027	0.039	0.012	0.003	0.003	0.002	0.006	0.014	0.010	0.003	0.024	285.745	0.569	0.1194184	0.8988931	0.8018204E-05	2.049631
11192011	22	0.022	0.037	0.013	0.003	0.002	0.002	0.005	0.013	0.014	0.003	0.025	285.751	0.573	0.8801466E-01	1.043885	0.2221028E-04	1.672098
11192011	23	0.019	0.031	0.012	0.003	0.002	0.002	0.005	0.012	0.018	0.004	0.025	284.968	0.593	0.1112400	1.206694	0.2569915E-04	1.671678
11192011	24	0.018	0.026	0.011	0.002	0.002	0.002	0.005	0.013	0.019	0.004	0.026	284.576	0.604	0.1253802	1.246368	0.2471286E-04	1.702723
11202011	01	0.017	0.023	0.012	0.002	0.002	0.002	0.006	0.014	0.018	0.005	0.027	284.352	0.612	0.1305349	1.279199	0.2279218E-04	1.749152
11202011	02	0.012	0.020	0.012	0.003	0.002	0.002	0.006	0.014	0.021	0.004	0.027	284.108	0.640	0.1378766	1.412938	0.2441913E-04	1.762393
11202011	03	0.010	0.018	0.012	0.003	0.002	0.002	0.006	0.014	0.023	0.005	0.028	283.756	0.689	0.1604102	1.812399	0.3149917E-04	1.759955
11202011	04	0.012	0.017	0.012	0.003	0.002	0.002	0.006	0.014	0.022	0.006	0.028	283.589	0.734	0.1964951	2.143499	0.2959814E-04	1.859859
11202011	05	0.014	0.017	0.011	0.002	0.002	0.002	0.006	0.015	0.020	0.007	0.028	283.260	0.794	0.2727218	2.683014	0.2317383E-04	2.063625
11202011	06	0.016	0.018	0.010	0.002	0.003	0.002	0.007	0.015	0.020	0.009	0.028	283.109	0.850	0.4210874	4.183483	0.2040676E-04	2.311764
11202011	07	0.016	0.018	0.010	0.003	0.003	0.002	0.007	0.016	0.021	0.012	0.028	283.697	0.877	0.4754008	5.538651	0.2107929E-04	2.419548
11202011	08	0.013	0.016	0.011	0.003	0.003	0.002	0.007	0.016	0.026	0.014	0.029	284.102	0.900	0.4979671	7.532061	0.3181951E-04	2.374220
11202011	09	0.013	0.016	0.011	0.003	0.003	0.003	0.007	0.016	0.031	0.015	0.031	284.884	0.902	0.5151536	8.426700	0.3374114E-04	2.397498
11202011	10	0.017	0.016	0.011	0.004	0.003	0.003	0.007	0.018	0.031	0.015	0.033	286.259	0.887	0.4650478	7.398882	0.2724701E-04	2.433847
11202011	11	0.009	0.016	0.021	0.002	0.003	0.003	0.007	0.016	0.034	0.009	0.034	288.082	0.857	0.2235838	5.412663	0.4848166E-04	2.047833
11202011	12	0.001	0.037	0.031	0.001	0.003	0.002	0.006	0.013	0.034	0.004	0.037	290.618	0.793	0.1077056E-03	4.014373	0.2134502E-02	0.2743212
11202011	13	0.001	0.080	0.040	0.002	0.003	0.002	0.005	0.011	0.029	0.003	0.037	292.045	0.761	0.000000	3.597251	0.4167248E-02	-0.6387864E-01
11202011	14	0.001	0.066	0.045	0.002	0.003	0.002	0.004	0.011	0.029	0.004	0.034	292.027	0.760	0.000000	3.309099	0.3198260E-02	0.1479601E-01
11202011	15	0.002	0.047	0.044	0.001	0.003	0.002	0.004	0.011	0.030	0.004	0.032	291.114	0.795	0.7796288E-04	4.041056	0.2202546E-02	0.2635699
11202011	16	0.020	0.039	0.035	0.001	0.003	0.003	0.005	0.015	0.025	0.007	0.032	290.751	0.818	0.1109340	3.847149	0.4963798E-04	1.889325
11202011	17	0.034	0.040	0.029	0.002	0.003	0.003	0.007	0.020	0.016	0.010	0.031	290.451	0.841	0.2237735	3.589330	0.1090114E-04	2.517541
11202011	18	0.056	0.050	0.022	0.002	0.004	0.005	0.009	0.028	0.008	0.009	0.032	289.265	0.873	0.3084425	2.696774	0.3210154E-05	2.924319
11202011	19	0.062	0.061	0.020	0.002	0.004	0.006	0.011	0.034	0.007	0.008	0.032	288.319	0.910	0.3399608	2.784238	0.8585445E-05	2.510944
11202011	20	0.055	0.064	0.018	0.002	0.004	0.006	0.012	0.038	0.009	0.009	0.033	287.825	0.925	0.5134875	5.535041	0.1709593E-04	2.510228
11202011	21	0.045	0.065	0.018	0.002	0.004	0.006	0.012	0.039	0.009	0.009	0.033	287.646	0.911	0.2579382	2.035385	0.7284393E-05	2.446253
11202011	22	0.032	0.061	0.021	0.002	0.004	0.006	0.011	0.035	0.009	0.010	0.032	287.227	0.940	0.4512203	6.592945	0.3257587E-04	2.306184
11202011	23	0.019	0.055	0.017	0.003	0.004	0.005	0.010	0.031	0.014	0.014	0.031	287.026	0.958	0.5347341	12.69749	0.8167254E-04	2.191642
11202011	24	0.016	0.048	0.015	0.003	0.003	0.005	0.009	0.028	0.012	0.012	0.030	286.791	0.969	0.6242061	20.21128	0.9463042E-04	2.329563
11212011	01	0.012	0.047	0.016	0.004	0.003	0.004	0.008	0.026	0.014	0.013	0.029	286.555	0.979	0.6694919	37.46565	0.2502579E-03	2.175245
11212011	02	0.009	0.045	0.017	0.005	0.003	0.003	0.008	0.024	0.018	0.015	0.028	286.328	0.985	0.7375343	94.19617	0.1076513E-02	1.942014
11212011	03	0.008	0.046	0.018	0.006	0.003	0.003	0.008	0.021	0.021	0.018	0.027	286.239	0.984	0.6551741	49.76326	0.4492100E-03	2.044459
11212011	04	0.008	0.052	0.018	0.006	0.003	0.002	0.007	0.019	0.025	0.021	0.026	286.170	0.984	0.6971949	55.85758	0.4774756E-03	2.068131
11212011	05	0.010	0.065	0.016	0.008	0.003	0.002	0.007	0.019	0.030	0.025	0.025	286.173	0.981	0.7642396	64.34019	0.4710195E-03	2.135443
11212011	06	0.018	0.077	0.011	0.009	0.003	0.002	0.008	0.020	0.036	0.029	0.025	286.434	0.981	0.9013056	74.74176	0.2292584E-03	2.513238
11212011	07	0.041	0.085	0.005	0.011	0.004	0.003	0.009	0.023	0.042	0.032	0.030	287.070	0.971	0.9431404	52.36688	0.5554124E-04	2.974441
11212011	08	0.068	0.087	0.003	0.012	0.004	0.005	0.010	0.028	0.042	0.032	0.035	287.657	0.955	0.9392512	37.78638	0.2869163E-04	3.119580
11212011	09	0.073	0.084	0.004	0.011	0.004	0.005	0.010	0.031	0.041	0.032	0.036	288.429	0.933	0.8292418	17.15898	0.1736894E-04	2.994718
11212011	10	0.075	0.084	0.011	0.007	0.004	0.005	0.011	0.034	0.033	0.028	0.035	289.705	0.912	0.5975671	7.877121	0.1479456E-04	2.726265
11212011	11	0.066	0.069	0.027	0.002	0.005	0.005	0.011	0.034	0.011	0.011	0.034	292.560	0.862	0.1287460E-03	0.8012632E-03	0.3387065E-08	2.373952
11212011	12	0.012	0.064	0.042	0.001	0.003	0.003	0.006	0.016	0.026	0.006	0.032	294.518	0.792	0.3659165E-01	2.898481	0.5738774E-04	1.703351
11212011	13	0.001	0.116	0.053	0.001	0.002	0.001	0.003	0.008	0.027	0.002	0.029	295.888	0.736	0.000000	2.678712	0.3633253E-02	-0.1323696
11212011	14	0.001	0.096	0.053	0.000	0.002	0.001	0.002	0.006	0.027	0.001	0.031	295.233	0.731	0.4844069E-03	3.104393	0.3995702E-02	-0.1096163
11212011	15	0.001	0.083	0.044	0.000	0.002	0.001	0.003	0.009	0.036	0.001	0.035	294.769	0.753	0.2216399E-02	3.453429	0.4478252E-02	-0.1128581
11212011	16	0.001	0.062	0.035	0.000	0.001	0.001	0.003	0.010	0.040	0.001	0.041	294.229	0.759	0.1360893E-02	4.172170	0.5695188E-02	-0.1351462
11212011	17	0.009	0.075	0.034	0.000	0.002	0.002	0.003	0.013	0.049	0.001	0.042	293.083	0.790	0.4775494E-01	7.801211	0.4821051E-02	0.2090203
11212011	18	0.071	0.107	0.022	0.001	0.002	0.004	0.006	0.025	0.023	0.008	0.040	291.287	0.834	0.3193987	4.306624	0.1050853E-04	2.612595
11212011	19	0.089	0.143	0.023	0.002	0.002	0.005	0.008	0.033	0.012	0.011	0.038	289.865	0.882	0.5059295	4.818293	0.4952461E-05	2.988072
11212011	20	0.068	0.156	0.018	0.003	0.003	0.005	0.009	0.036	0.020	0.018	0.037	287.825	0.925	0.7273515	11.09536	0.2121808E-04	2.718435
11212011	21	0.049	0.147	0.022	0.003	0.003	0.005	0.009	0.037	0.024	0.022	0.037	287.646	0.911	0.5537599	7.162230	0.2519851E-04	2.453673
11212011	22	0.029	0.129	0.027	0.003	0.003	0.004	0.009	0.033	0.030	0.028	0.037	287.227	0.940	0.6788685	19.70464	0.7143663E-04	2.440648
11212011	23	0.014	0.107	0.020	0.005	0.003	0.004	0.008	0.028	0.039	0.035	0.034	287.026	0.958	0.7236598	35.36604	0.1747101E-03	2.306268
11212011	24	0.016	0.079	0.014	0.005	0.003	0.003	0.008	0.025	0.030	0.027	0.031	286.791	0.969	0.7937890	41.83624	0.1600513E-03	2.417293
11222011	01	0.015	0.060	0.013	0.005	0.003	0.003	0.007	0.022	0.026	0.022	0.028	286.555	0.979	0.8495038	60.00615	0.2202035E-03	2.435371
11222011	02	0.013	0.049	0.013	0.004	0.003	0.002	0.007	0.019	0.023	0.021	0.025	286.328	0.985	0.8896371	122.2791	0.6094457E-03	2.302417
11222011	03	0.012	0.045	0.014	0.004	0.003	0.002	0.007	0.017	0.022	0.020	0.023	286.239	0.984	0.7834393	53.40461	0.2767671E-03	2.285464
11222011	04	0.012	0.051	0.015	0.004	0.003	0.002	0.007	0.017	0.023	0.020	0.021	286.170	0.984	0.7785297	51.66224	0.2886128E-03	2.252858
11222011	05	0.014	0.065	0.015	0.004	0.003	0.002	0.007	0.017	0.025	0.022	0.020	286.173	0.981	0.8086323	54.14799	0.2834378E-03	2.281125
11222011	06	0.024	0.080	0.011	0.005	0.003	0.002	0.008	0.019	0.029	0.026	0.021	286.434	0.981	0.9080630	60.40620	0.1596332E-03	2.577958
11222011	07	0.044	0.086	0.005	0.006	0.004	0.003	0.009	0.023	0.037	0.032	0.029	287.070	0.971	0.9404211	46.45779	0.4685717E-04	2.996282
11222011	08	0.070	0.086	0.003	0.007	0.004	0.005	0.010	0.027	0.038	0.031	0.037	287.657	0.955	0.9448871	35.40763	0.2128232E-04	3.221078
11222011	09	0.073	0.083	0.004	0.007	0.004	0.005	0.011	0.031	0.038	0.032	0.041	288.429	0.933	0.8583939	18.51230	0.1462203E-04	3.102453
11222011	10	0.069	0.084	0.009	0.006	0.005	0.005	0.012	0.034	0.037	0.033	0.041	289.705	0.912	0.7037042	11.82741	0.1334447E-04	2.947588
11222011	11	0.058	0.070	0.025	0.003	0.005	0.005	0.012	0.035	0.021	0.020	0.040	292.560	0.862	0.2168226	2.718546	0.3119069E-05	2.940312
11222011	12	0.011	0.066	0.050	0.001	0.004	0.003	0.007	0.018	0.035	0.008	0.039	294.518	0.792	0.3845096E-03	10.46133	0.4797170E-02	0.3386019
11222011	13	0.002	0.117	0.055	0.001	0.003	0.001	0.004	0.008	0.033	0.003	0.032	295.888	0.736	0.000000	3.170746	0.3555550E-02	-0.4974522E-01
11222011	14	0.001	0.096	0.053	0.001	0.002	0.001	0.003	0.007	0.032	0.002	0.033	295.233	0.731	0.000000	3.119026	0.4708523E-02	-0.1788656
11222011	15	0.003	0.082	0.042	0.001	0.002	0.001	0.003	0.009	0.042	0.001	0.036	294.769	0.753	0.000000	3.760254	0.3450641E-02	0.3731738E-01
11222011	16	0.002	0.061	0.033	0.001	0.002	0.002	0.003	0.010	0.048	0.001	0.041	294.229	0.759	0.000000	4.515170	0.3728909E-02	0.8309236E-01
11222011	17	0.014	0.074	0.031	0.001	0.002	0.002	0.003	0.013	0.054	0.002	0.044	293.083	0.790	0.4908633E-01	5.267475	0.3022088E-03	1.241295
11222011	18	0.075	0.106	0.020	0.002	0.003	0.004	0.006	0.025	0.028	0.008	0.043	291.287	0.834	0.3526834	4.990909	0.1357563E-04	2.565420
11222011	19	0.095	0.142	0.016	0.003	0.003	0.005	0.008	0.033	0.018	0.015	0.042	289.865	0.882	0.6359198	6.661986	0.5189820E-05	3.108451
11222011	20	0.008	0.049	0.014	0.006	0.002	0.003	0.004	0.014	0.042	0.003	0.041	290.273	0.929	0.1326679	19.86492	0.4839225E-02	0.6133111
11222011	21	0.000	0.021	0.009	0.002	0.001	0.001	0.002	0.004	0.036	0.001	0.039	290.091	0.957	0.3732294E-01	28.36848	0.1046705E-01	0.4330119
11222011	22	0.001	0.024	0.011	0.001	0.001	0.001	0.001	0.002	0.043	0.001	0.041	289.640	0.975	0.1360862	65.74377	0.1321583E-01	0.6967601
11222011	23	0.001	0.026	0.013	0.001	0.002	0.001	0.002	0.002	0.046	0.001	0.034	289.155	0.977	0.2064326	54.85695	0.7441578E-02	0.8675666
11222011	24	0.005	0.020	0.011	0.001	0.002	0.001	0.002	0.002	0.039	0.003	0.024	288.837	0.976	0.3718337	43.51876	0.6896766E-03	1.800031
11232011	01	0.008	0.015	0.009	0.002	0.002	0.001	0.002	0.002	0.032	0.003	0.019	288.621	0.975	0.5505861	39.49132	0.2736890E-03	2.159244
11232011	02	0.007	0.013	0.008	0.002	0.002	0.001	0.001	0.002	0.033	0.002	0.019	288.345	0.973	0.4251680	23.27529	0.1830526E-03	2.104319
11232011	03	0.005	0.015	0.009	0.001	0.002	0.001	0.001	0.002	0.038	0.002	0.022	287.968	0.970	0.3731611	25.86991	0.3008990E-03	1.934374
11232011	04	0.003	0.017	0.013	0.002	0.002	0.001	0.001	0.002	0.047	0.003	0.027	287.515	0.967	0.2789559	30.88680	0.7202156E-03	1.632310
11232011	05	0.005	0.018	0.014	0.003	0.003	0.001	0.002	0.002	0.058	0.006	0.031	287.012	0.966	0.4655043	41.28595	0.5843649E-03	1.849118
11232011	06	0.007	0.019	0.012	0.004	0.003	0.001	0.002	0.003	0.064	0.011	0.032	286.520	0.964	0.5624985	33.94300	0.3060703E-03	2.044929
11232011	07	0.011	0.021	0.010	0.005	0.003	0.001	0.002	0.003	0.065	0.011	0.034	286.825	0.909	0.3924342	13.78303	0.1651773E-03	1.921394
11232011	08	0.007	0.029	0.017	0.004	0.003	0.002	0.002	0.004	0.075	0.007	0.042	286.248	0.912	0.3339626	15.97241	0.3245203E-03	1.692129
11232011	09	0.001	0.051	0.033	0.004	0.003	0.002	0.003	0.005	0.088	0.004	0.074	286.661	0.893	0.2348727E-01	20.06217	0.1509628E-01	0.1235078
11232011	10	0.000	0.064	0.059	0.003	0.003	0.002	0.005	0.009	0.082	0.007	0.144	287.324	0.836	0.3943026E-02	33.65260	0.6679740E-01	-0.2977409
11232011	11	0.000	0.044	0.053	0.005	0.003	0.002	0.005	0.011	0.083	0.008	0.169	287.472	0.793	0.1758039E-02	32.47555	0.8703299E-01	-0.4281273
11232011	12	0.000	0.038	0.046	0.006	0.003	0.002	0.005	0.010	0.077	0.007	0.161	286.972	0.766	0.1271427E-02	28.84236	0.8419766E-01	-0.4652691
11232011	13	0.000	0.033	0.038	0.004	0.003	0.002	0.005	0.011	0.074	0.004	0.138	286.322	0.748	0.9309053E-03	21.62727	0.5986036E-01	-0.4421377
11232011	14	0.000	0.031	0.037	0.002	0.002	0.001	0.004	0.010	0.064	0.002	0.094	287.474	0.655	0.000000	9.302780	0.1959339E-01	-0.3234968
11232011	15	0.000	0.028	0.034	0.001	0.002	0.001	0.003	0.006	0.049	0.001	0.054	286.570	0.649	0.000000	4.432967	0.3723907E-01	-0.9243042
11232011	16	0.000	0.032	0.026	0.001	0.001	0.001	0.002	0.006	0.048	0.001	0.043	285.817	0.661	0.000000	3.377735	0.1874276E-01	-0.7442079
11232011	17	0.000	0.039	0.020	0.001	0.001	0.001	0.003	0.007	0.055	0.001	0.043	285.132	0.677	0.000000	3.637222	0.8997235E-02	-0.3933393
11232011	18	0.002	0.047	0.016	0.001	0.002	0.001	0.003	0.008	0.064	0.001	0.043	284.502	0.692	0.1575768E-02	4.682553	0.2141756E-02	0.3397128
11232011	19	0.009	0.052	0.014	0.001	0.002	0.001	0.004	0.010	0.067	0.004	0.044	283.662	0.715	0.2545642	4.563418	0.1834647E-03	1.395738
11232011	20	0.015	0.051	0.011	0.002	0.002	0.001	0.004	0.012	0.066	0.008	0.045	283.081	0.739	0.3744202	4.979497	0.1140310E-03	1.640162
11232011	21	0.015	0.047	0.012	0.002	0.002	0.001	0.004	0.011	0.068	0.010	0.045	282.624	0.757	0.4060928	5.673491	0.1228463E-03	1.664488
11232011	22	0.013	0.043	0.013	0.002	0.002	0.001	0.004	0.011	0.071	0.012	0.044	282.181	0.773	0.4571112	5.981691	0.1052646E-03	1.754541
11232011	23	0.011	0.039	0.014	0.003	0.002	0.001	0.004	0.010	0.073	0.013	0.044	281.662	0.793	0.4614019	6.830869	0.1298657E-03	1.720981
11232011	24	0.008	0.035	0.015	0.003	0.002	0.001	0.004	0.009	0.074	0.013	0.044	281.166	0.813	0.4301796	7.653106	0.1844099E-03	1.618054
11242011	01	0.006	0.033	0.016	0.003	0.002	0.001	0.004	0.008	0.076	0.013	0.044	280.663	0.833	0.4203246	8.729658	0.2431407E-03	1.555140
11242011	02	0.004	0.032	0.017	0.002	0.002	0.001	0.003	0.007	0.077	0.013	0.043	280.109	0.851	0.4045085	9.816190	0.3230973E-03	1.482610
11242011	03	0.003	0.034	0.020	0.002	0.002	0.001	0.003	0.007	0.076	0.013	0.042	279.529	0.860	0.3974239	10.41395	0.3709338E-03	1.448319
11242011	04	0.002	0.034	0.023	0.002	0.002	0.001	0.003	0.006	0.072	0.012	0.040	278.904	0.868	0.3329558	10.63257	0.5317503E-03	1.300930
11242011	05	0.001	0.032	0.024	0.001	0.002	0.001	0.003	0.006	0.066	0.011	0.037	278.126	0.884	0.3234894	10.56753	0.5605451E-03	1.275363
11242011	06	0.001	0.031	0.020	0.001	0.002	0.001	0.003	0.006	0.063	0.014	0.035	277.429	0.895	0.3699553	12.34318	0.5582779E-03	1.344577
11242011	07	0.002	0.028	0.016	0.002	0.002	0.001	0.003	0.007	0.061	0.018	0.032	276.777	0.901	0.5264927	12.57807	0.2900153E-03	1.637193
11242011	08	0.007	0.026	0.009	0.002	0.002	0.001	0.003	0.008	0.058	0.024	0.028	276.987	0.854	0.7130727	8.104388	0.5939906E-04	2.134941
11242011	09	0.018	0.029	0.007	0.002	0.002	0.002	0.004	0.011	0.053	0.029	0.026	279.094	0.746	0.7142896	4.173784	0.1216662E-04	2.535360
11242011	10	0.021	0.020	0.016	0.001	0.001	0.001	0.003	0.008	0.033	0.018	0.019	282.449	0.609	0.2725097	1.340901	0.1119738E-04	2.078280
11242011	11	0.031	0.018	0.023	0.001	0.001	0.001	0.003	0.008	0.013	0.007	0.014	285.902	0.490	0.5788440E-01	0.4192804	0.5601343E-05	1.874212
11242011	12	0.032	0.022	0.033	0.000	0.001	0.001	0.002	0.007	0.006	0.002	0.012	288.742	0.403	NaN	0.6654179	0.1712151E-02	-0.4104476
11242011	13	0.029	0.031	0.042	0.000	0.001	0.001	0.002	0.006	0.006	0.001	0.011	290.682	0.350	NaN	0.4854971	0.1289901E-01	-1.424370
11242011	14	0.028	0.043	0.044	0.000	0.001	0.001	0.002	0.006	0.006	0.001	0.011	291.389	0.336	NaN	0.4528418	0.1595975E-01	-1.547079
11242011	15	0.032	0.048	0.049	0.000	0.001	0.001	0.002	0.006	0.005	0.001	0.011	290.549	0.360	NaN	0.5299492	0.1794660E-01	-1.529748
11242011	16	0.038	0.050	0.049	0.000	0.001	0.001	0.002	0.007	0.004	0.002	0.011	289.180	0.399	NaN	0.6909392	0.1171993E-01	-1.229485
11242011	17	0.044	0.051	0.044	0.000	0.001	0.001	0.002	0.007	0.003	0.003	0.011	287.373	0.448	NaN	0.9810956	0.2644117E-02	-0.4305694
11242011	18	0.057	0.056	0.037	0.000	0.001	0.002	0.003	0.010	0.003	0.003	0.011	285.452	0.503	NaN	0.8950062	0.8323349E-06	3.031528
11242011	19	0.079	0.074	0.008	0.003	0.002	0.003	0.006	0.018	0.015	0.033	0.012	283.625	0.569	NaN	2.347330	0.6516128E-06	3.556584
11242011	20	0.093	0.083	0.000	0.005	0.002	0.004	0.007	0.024	0.018	0.053	0.013	282.189	0.630	NaN	4.075812	0.8063855E-06	3.703671
11242011	21	0.088	0.082	0.000	0.005	0.002	0.004	0.008	0.027	0.022	0.062	0.014	281.099	0.674	NaN	5.149952	0.1052837E-05	3.689442
11242011	22	0.077	0.078	0.000	0.005	0.002	0.004	0.009	0.027	0.032	0.072	0.014	280.198	0.711	NaN	6.409200	0.1663521E-05	3.585775
11242011	23	0.066	0.073	0.000	0.005	0.002	0.004	0.009	0.027	0.037	0.077	0.014	279.482	0.742	NaN	7.518817	0.2387587E-05	3.498190
11242011	24	0.048	0.068	0.000	0.005	0.002	0.004	0.008	0.025	0.042	0.077	0.014	278.896	0.768	NaN	8.431079	0.4099645E-05	3.313137
11252011	01	0.031	0.064	0.000	0.005	0.002	0.004	0.008	0.023	0.046	0.076	0.014	278.293	0.790	NaN	9.056290	0.6850307E-05	3.121240
11252011	02	0.019	0.063	0.000	0.004	0.002	0.003	0.007	0.021	0.045	0.070	0.014	277.808	0.807	NaN	8.957109	0.1212880E-04	2.868350
11252011	03	0.012	0.064	0.012	0.002	0.002	0.003	0.007	0.019	0.041	0.047	0.015	277.196	0.832	0.7278842	5.530735	0.1837559E-04	2.478542
11252011	04	0.010	0.067	0.015	0.002	0.002	0.002	0.006	0.016	0.036	0.035	0.015	276.694	0.848	0.7081919	5.353895	0.2137769E-04	2.398709
11252011	05	0.008	0.074	0.015	0.002	0.002	0.002	0.006	0.015	0.036	0.034	0.015	276.252	0.860	0.7112448	5.771533	0.2629301E-04	2.341451
11252011	06	0.007	0.084	0.015	0.002	0.002	0.002	0.006	0.016	0.039	0.037	0.016	275.952	0.862	0.7224205	6.209922	0.2980850E-04	2.318746
11252011	07	0.008	0.099	0.018	0.002	0.002	0.002	0.006	0.016	0.042	0.041	0.016	275.612	0.868	0.7332175	7.834260	0.4768633E-04	2.215604
11252011	08	0.007	0.122	0.015	0.003	0.002	0.003	0.007	0.018	0.054	0.052	0.017	275.931	0.830	0.7620028	6.588426	0.2508936E-04	2.419292
11252011	09	0.012	0.126	0.020	0.002	0.002	0.003	0.008	0.021	0.061	0.059	0.018	278.216	0.719	0.7003896	3.517310	0.5231208E-05	2.827609
11252011	10	0.015	0.149	0.035	0.001	0.002	0.003	0.007	0.018	0.049	0.048	0.022	281.851	0.580	0.3904698	1.240600	0.1013157E-05	3.087955
11252011	11	0.024	0.172	0.048	0.001	0.002	0.003	0.007	0.017	0.034	0.028	0.027	285.454	0.470	0.1520113	0.8521810	0.2876416E-05	2.471680
11252011	12	0.025	0.194	0.059	0.000	0.002	0.003	0.006	0.016	0.027	0.010	0.031	288.729	0.384	NaN	1.113065	0.3273017E-01	-1.468428
11252011	13	0.009	0.235	0.064	0.000	0.002	0.002	0.005	0.011	0.035	0.002	0.032	290.910	0.332	0.1479191E-01	1.796384	0.3633364E-02	-0.3059098
11252011	14	0.003	0.217	0.066	0.000	0.002	0.002	0.004	0.010	0.043	0.001	0.035	291.777	0.318	0.1058996E-01	1.388660	0.3238765E-02	-0.3677834
11252011	15	0.002	0.163	0.061	0.000	0.001	0.002	0.004	0.009	0.040	0.001	0.033	291.099	0.342	0.9714663E-02	1.201774	0.2778932E-02	-0.3640550
11252011	16	0.002	0.133	0.059	0.000	0.001	0.002	0.003	0.009	0.041	0.001	0.032	289.806	0.383	0.1331520E-01	1.525010	0.2885836E-02	-0.2769989
11252011	17	0.008	0.118	0.055	0.000	0.001	0.002	0.004	0.009	0.040	0.001	0.032	288.039	0.434	0.2347404E-01	2.390143	0.3375265E-02	-0.1498839
11252011	18	0.038	0.123	0.044	0.000	0.002	0.003	0.005	0.014	0.030	0.004	0.033	286.007	0.495	NaN	2.257314	0.4044623E-02	-0.2532860
11252011	19	0.067	0.143	0.033	0.001	0.002	0.004	0.008	0.023	0.024	0.018	0.035	284.210	0.566	0.4428657	1.764677	0.2384187E-05	2.869325
11252011	20	0.055	0.150	0.031	0.001	0.003	0.004	0.009	0.027	0.038	0.037	0.036	283.082	0.617	0.5806641	2.439455	0.2007588E-05	3.084618
11252011	21	0.040	0.150	0.035	0.002	0.003	0.004	0.009	0.028	0.048	0.047	0.037	282.458	0.642	0.5971380	3.070747	0.3185930E-05	2.984008
11252011	22	0.029	0.148	0.039	0.002	0.003	0.004	0.009	0.027	0.048	0.045	0.038	282.221	0.649	0.5506076	3.345477	0.5274339E-05	2.802290
11252011	23	0.021	0.147	0.042	0.002	0.003	0.004	0.009	0.026	0.043	0.036	0.039	282.109	0.674	0.4739932	3.382285	0.9146444E-05	2.567958
11252011	24	0.016	0.143	0.037	0.002	0.003	0.004	0.009	0.023	0.039	0.026	0.039	281.997	0.691	0.4173778	3.425294	0.1617638E-04	2.325817
11262011	01	0.014	0.132	0.030	0.002	0.002	0.003	0.008	0.021	0.036	0.019	0.038	281.921	0.705	0.3590329	3.233337	0.2526720E-04	2.107094
11262011	02	0.013	0.106	0.021	0.002	0.002	0.003	0.008	0.019	0.031	0.013	0.036	281.953	0.723	0.3402467	2.985684	0.2608246E-04	2.058695
11262011	03	0.010	0.074	0.017	0.002	0.003	0.003	0.008	0.018	0.029	0.008	0.035	282.090	0.747	0.3408463	3.151895	0.2820144E-04	2.048301
11262011	04	0.012	0.055	0.014	0.002	0.003	0.003	0.008	0.018	0.026	0.008	0.034	282.307	0.774	0.3672051	3.237249	0.2304940E-04	2.147517
11262011	05	0.014	0.049	0.012	0.003	0.003	0.003	0.008	0.018	0.025	0.009	0.034	282.540	0.805	0.4131559	3.993272	0.2374003E-04	2.225848
11262011	06	0.016	0.049	0.012	0.003	0.003	0.003	0.009	0.018	0.026	0.012	0.034	282.767	0.826	0.4722271	4.787372	0.2219814E-04	2.333781
11262011	07	0.020	0.052	0.012	0.004	0.003	0.003	0.009	0.020	0.027	0.015	0.034	282.982	0.837	0.5564116	5.279624	0.1517479E-04	2.541480
11262011	08	0.025	0.045	0.013	0.004	0.004	0.003	0.009	0.021	0.029	0.020	0.034	283.237	0.828	0.6014975	5.396607	0.1185817E-04	2.658103
11262011	09	0.032	0.044	0.014	0.005	0.004	0.004	0.010	0.024	0.027	0.024	0.035	284.898	0.819	0.5870429	5.083433	0.7031740E-05	2.859094
11262011	10	0.031	0.036	0.023	0.004	0.004	0.004	0.010	0.024	0.018	0.016	0.035	288.162	0.743	0.2858238	2.501089	0.3972378E-05	2.799079
11262011	11	0.018	0.030	0.033	0.002	0.003	0.003	0.006	0.015	0.018	0.006	0.030	290.460	0.690	0.5513203E-01	1.961676	0.3906681E-04	1.700819
11262011	12	0.012	0.027	0.031	0.002	0.002	0.002	0.004	0.009	0.016	0.003	0.021	291.815	0.659	0.1803792E-01	1.351997	0.6491841E-04	1.318608
11262011	13	0.009	0.023	0.032	0.002	0.002	0.001	0.003	0.006	0.014	0.002	0.016	292.569	0.640	0.7670224E-02	1.013717	0.1046932E-03	0.9859980
11262011	14	0.004	0.018	0.033	0.002	0.002	0.001	0.002	0.005	0.017	0.001	0.016	292.824	0.623	0.5775690E-04	1.972043	0.2384027E-02	-0.8239482E-01
11262011	15	0.004	0.017	0.031	0.001	0.002	0.001	0.002	0.005	0.018	0.001	0.016	291.816	0.629	0.8976460E-04	2.217675	0.2378538E-02	-0.3041226E-01
11262011	16	0.009	0.018	0.026	0.001	0.002	0.001	0.002	0.006	0.019	0.002	0.018	291.270	0.652	0.1224917E-01	1.263898	0.1436184E-03	0.9445020
11262011	17	0.018	0.022	0.019	0.001	0.002	0.001	0.003	0.008	0.021	0.002	0.022	290.182	0.677	0.3604168E-01	1.615250	0.8127429E-04	1.298287
11262011	18	0.042	0.028	0.015	0.002	0.003	0.003	0.005	0.014	0.012	0.003	0.025	288.760	0.718	0.1763906	1.757160	0.7450489E-05	2.372627
11262011	19	0.054	0.033	0.014	0.002	0.003	0.004	0.007	0.021	0.005	0.005	0.028	287.814	0.749	0.2973070	1.510889	0.1555413E-05	2.987387
11262011	20	0.048	0.034	0.014	0.002	0.003	0.004	0.008	0.024	0.004	0.004	0.028	287.413	0.762	0.1674264	0.7494147	0.5287029E-06	3.151510
11262011	21	0.039	0.031	0.012	0.003	0.003	0.004	0.007	0.022	0.003	0.004	0.025	287.261	0.773	0.1224885	0.5782824	0.4485219E-06	3.110356
11262011	22	0.028	0.023	0.011	0.003	0.003	0.004	0.008	0.022	0.002	0.002	0.021	287.220	0.790	0.000000	0.2372337E-08	0.1367509E-18	7.239246
11262011	23	0.019	0.016	0.004	0.006	0.003	0.003	0.008	0.020	0.002	0.008	0.016	287.286	0.804	0.2500000	0.4272997	0.2988574E-06	3.155269
11262011	24	0.015	0.012	0.000	0.011	0.003	0.003	0.007	0.017	0.001	0.017	0.011	287.412	0.813	NaN	4.711585	0.2777736E-09	7.229476
11272011	01	0.010	0.011	0.000	0.013	0.003	0.002	0.006	0.014	0.003	0.020	0.009	287.377	0.829	0.7604584	4.346387	0.2889921E-05	3.177243
11272011	02	0.007	0.010	0.001	0.013	0.003	0.002	0.005	0.012	0.005	0.019	0.008	287.277	0.850	0.6977280	4.373615	0.6157285E-05	2.851451
11272011	03	0.006	0.010	0.001	0.013	0.003	0.002	0.005	0.011	0.005	0.017	0.007	287.086	0.878	0.7118118	5.145607	0.4410334E-05	3.066965
11272011	04	0.005	0.011	0.002	0.013	0.004	0.002	0.004	0.010	0.004	0.015	0.006	286.971	0.898	0.7338101	6.061014	0.6022138E-05	3.002795
11272011	05	0.005	0.012	0.002	0.013	0.004	0.002	0.004	0.009	0.004	0.014	0.006	287.031	0.908	0.6979142	6.142873	0.7590636E-05	2.908093
11272011	06	0.006	0.013	0.001	0.014	0.004	0.001	0.004	0.009	0.004	0.014	0.006	288.547	0.836	0.6800284	3.443746	0.9597764E-05	2.554861
11272011	07	0.008	0.015	0.001	0.014	0.004	0.002	0.004	0.009	0.004	0.014	0.006	288.753	0.827	0.6830749	3.515529	0.1567298E-05	3.350839
11272011	08	0.010	0.017	0.000	0.014	0.004	0.002	0.003	0.009	0.003	0.015	0.005	289.063	0.812	0.8000000	3.344527	0.1595929E-05	3.321321
11272011	09	0.013	0.019	0.000	0.013	0.004	0.002	0.003	0.010	0.002	0.015	0.005	290.399	0.752	0.9333333	2.889473	0.7651050E-06	3.577098
11272011	10	0.014	0.019	0.001	0.013	0.004	0.002	0.003	0.010	0.003	0.016	0.005	293.035	0.637	0.8235294	2.109760	0.2232211E-06	3.975498
11272011	11	0.008	0.019	0.003	0.010	0.004	0.002	0.003	0.008	0.007	0.017	0.005	294.900	0.567	0.8487889	1.701051	0.1442506E-04	2.071600
11272011	12	0.010	0.018	0.016	0.003	0.003	0.001	0.002	0.005	0.001	0.003	0.005	295.489	0.529	0.1578947	0.1305737	0.1127593E-07	4.063703
11272011	13	0.010	0.016	0.019	0.002	0.003	0.001	0.002	0.004	0.000	0.001	0.006	295.936	0.497	0.5547404E-02	0.1234815	0.1000066E-05	2.091573
11272011	14	0.012	0.018	0.019	0.002	0.003	0.001	0.002	0.004	0.000	0.001	0.007	295.864	0.488	0.1078665E-01	0.2309522	0.1479149E-05	2.193510
11272011	15	0.016	0.021	0.016	0.002	0.003	0.001	0.002	0.005	0.001	0.001	0.009	294.884	0.499	0.7190526E-02	0.3273046	0.5032351E-05	1.813181
11272011	16	0.022	0.027	0.014	0.002	0.003	0.001	0.003	0.007	0.000	0.001	0.011	294.305	0.519	0.2770758E-01	0.3303705	0.9429324E-06	2.544521
11272011	17	0.027	0.035	0.011	0.002	0.003	0.002	0.004	0.010	0.000	0.000	0.012	293.246	0.543	0.8407772E-02	0.5807118E-01	0.2226067E-07	3.416423
11272011	18	0.029	0.038	0.010	0.002	0.003	0.002	0.004	0.012	0.000	0.000	0.012	292.200	0.568	0.000000	0.3979041E-08	0.2389685E-18	7.221438
11272011	19	0.027	0.034	0.006	0.002	0.003	0.002	0.005	0.013	0.000	0.004	0.011	291.923	0.584	0.3000000	0.1554510	0.9843886E-08	4.198427
11272011	20	0.023	0.025	0.000	0.006	0.004	0.002	0.005	0.013	0.000	0.011	0.010	291.896	0.597	NaN	1.519893	0.9244092E-10	7.215949
11272011	21	0.020	0.016	0.000	0.007	0.004	0.002	0.005	0.013	0.000	0.013	0.009	291.732	0.627	NaN	1.890063	0.1170294E-09	7.208181
11272011	22	0.018	0.011	0.000	0.007	0.004	0.002	0.005	0.012	0.000	0.012	0.008	291.418	0.662	NaN	2.033478	0.1277398E-09	7.201913
11272011	23	0.015	0.009	0.000	0.007	0.004	0.002	0.005	0.011	0.000	0.010	0.008	290.921	0.716	NaN	2.189818	0.1401961E-09	7.193672
11272011	24	0.012	0.009	0.003	0.003	0.004	0.002	0.004	0.010	0.000	0.005	0.008	290.483	0.748	0.5000001	0.4023833	0.1845781E-06	3.338460
11282011	01	0.010	0.009	0.003	0.003	0.004	0.002	0.004	0.010	0.000	0.004	0.008	289.891	0.794	0.5714286	0.4954011	0.3464650E-06	3.155298
11282011	02	0.009	0.010	0.004	0.003	0.004	0.002	0.004	0.010	0.000	0.004	0.008	289.679	0.820	0.5000000	0.5940183	0.5657088E-06	3.021207
11282011	03	0.009	0.011	0.004	0.002	0.004	0.001	0.004	0.010	0.000	0.005	0.008	289.683	0.842	0.4444445	0.6768610	0.6225522E-06	3.036324
11282011	04	0.009	0.012	0.005	0.003	0.004	0.001	0.004	0.010	0.000	0.005	0.008	289.499	0.873	0.4000000	0.8771183	0.1273323E-05	2.838120
11282011	05	0.011	0.013	0.005	0.004	0.004	0.001	0.004	0.010	0.001	0.005	0.009	289.259	0.906	0.4000000	1.413850	0.2716592E-05	2.716379
11282011	06	0.016	0.015	0.005	0.004	0.004	0.002	0.004	0.011	0.001	0.005	0.009	289.004	0.945	0.4021379	3.083562	0.6112711E-05	2.702819
11282011	07	0.023	0.020	0.005	0.004	0.004	0.002	0.004	0.010	0.002	0.004	0.010	289.098	0.965	0.5934991	7.423134	0.1550288E-04	2.680175
11282011	08	0.014	0.013	0.004	0.002	0.002	0.001	0.002	0.004	0.014	0.002	0.012	289.074	0.970	0.4704398	12.13181	0.3577502E-04	2.530346
11282011	09	0.008	0.013	0.002	0.000	0.000	0.000	0.000	0.000	0.008	0.000	0.005	288.408	0.973	0.1220502	5.788919	0.6277607E-04	1.964803
11282011	10	0.006	0.013	0.002	0.000	0.000	0.000	0.000	0.000	0.007	0.000	0.004	287.548	0.960	0.6592822E-01	3.361345	0.5405036E-04	1.793714
11282011	11	0.006	0.017	0.002	0.000	0.000	0.000	0.000	0.000	0.008	0.000	0.004	286.474	0.956	0.9743488E-01	3.410143	0.4152410E-04	1.914472
11282011	12	0.009	0.028	0.003	0.000	0.000	0.000	0.000	0.000	0.007	0.000	0.004	285.439	0.941	0.9063792E-01	2.270678	0.3001102E-04	1.878875
11282011	13	0.013	0.041	0.005	0.000	0.001	0.001	0.000	0.000	0.009	0.002	0.005	284.311	0.925	NaN	4.870201	0.3557542E-04	2.136397
11282011	14	0.011	0.048	0.007	0.001	0.001	0.001	0.001	0.001	0.016	0.003	0.008	283.266	0.907	0.3285097	3.482915	0.1925598E-04	2.257377
11282011	15	0.012	0.056	0.007	0.001	0.002	0.001	0.001	0.001	0.021	0.005	0.011	282.427	0.903	0.4112183	4.537186	0.2869414E-04	2.198993
11282011	16	0.015	0.063	0.006	0.002	0.002	0.001	0.001	0.001	0.024	0.007	0.011	281.642	0.912	0.5815958	5.980182	0.2296860E-04	2.415580
11282011	17	0.019	0.065	0.004	0.002	0.002	0.002	0.001	0.001	0.027	0.010	0.012	280.982	0.913	0.7196007	7.139125	0.1805162E-04	2.597129
11282011	18	0.024	0.062	0.003	0.003	0.002	0.002	0.001	0.001	0.027	0.011	0.012	280.318	0.896	0.7644233	6.785249	0.1414214E-04	2.681051
11282011	19	0.031	0.058	0.002	0.003	0.002	0.002	0.002	0.001	0.026	0.011	0.012	279.437	0.885	0.8247224	6.213460	0.9233434E-05	2.827970
11282011	20	0.034	0.060	0.002	0.003	0.002	0.002	0.002	0.001	0.026	0.011	0.012	278.800	0.880	0.8435950	5.740103	0.7750687E-05	2.869580
11282011	21	0.028	0.063	0.002	0.003	0.002	0.002	0.002	0.001	0.026	0.010	0.011	278.345	0.882	0.8368366	5.279176	0.7123760E-05	2.869857
11282011	22	0.017	0.071	0.004	0.002	0.002	0.001	0.002	0.001	0.025	0.009	0.011	277.996	0.880	0.7433643	4.927808	0.1326858E-04	2.569829
11282011	23	0.007	0.071	0.007	0.001	0.001	0.001	0.001	0.001	0.020	0.005	0.010	278.256	0.835	0.3832541	2.577129	0.2668382E-04	1.984888
11282011	24	0.001	0.074	0.011	0.000	0.001	0.000	0.000	0.000	0.015	0.000	0.009	278.029	0.828	0.000000	1.781850	0.1081535E-02	0.2168307
11292011	01	0.000	0.071	0.011	0.000	0.001	0.000	0.000	0.000	0.013	0.000	0.009	277.920	0.820	0.000000	1.612139	0.3103772E-02	-0.2844873
11292011	02	0.000	0.078	0.011	0.000	0.001	0.000	0.000	0.000	0.013	0.000	0.009	277.719	0.821	0.000000	1.612139	0.3115570E-02	-0.2861350
11292011	03	0.000	0.091	0.012	0.000	0.001	0.000	0.000	0.000	0.013	0.000	0.009	277.495	0.827	0.000000	1.706034	0.3025682E-02	-0.2488356
11292011	04	0.000	0.101	0.012	0.000	0.001	0.000	0.000	0.000	0.013	0.000	0.009	277.245	0.837	0.000000	1.805560	0.2937178E-02	-0.2113183
11292011	05	0.000	0.103	0.012	0.000	0.001	0.000	0.000	0.000	0.015	0.000	0.009	276.988	0.847	0.000000	1.975282	0.1557520E-02	0.1031953
11292011	06	0.002	0.100	0.010	0.000	0.001	0.000	0.000	0.001	0.017	0.002	0.009	276.756	0.853	NaN	2.382370	0.6933665E-02	-0.4639538
11292011	07	0.005	0.097	0.007	0.001	0.001	0.001	0.000	0.001	0.020	0.005	0.009	276.544	0.859	0.4520345	2.854209	0.2678296E-04	2.027627
11292011	08	0.009	0.100	0.005	0.001	0.001	0.001	0.001	0.001	0.022	0.008	0.009	276.431	0.865	0.6443414	3.630787	0.1577750E-04	2.361963
11292011	09	0.010	0.104	0.005	0.002	0.002	0.001	0.001	0.001	0.023	0.009	0.009	276.513	0.864	0.6735129	3.647754	0.1324876E-04	2.439850
11292011	10	0.009	0.108	0.005	0.002	0.002	0.001	0.001	0.001	0.023	0.010	0.009	276.722	0.858	0.6405442	3.659109	0.1505807E-04	2.385606
11292011	11	0.007	0.118	0.007	0.001	0.002	0.001	0.001	0.001	0.021	0.009	0.009	276.970	0.851	0.5284131	3.120914	0.1937844E-04	2.206963
11292011	12	0.008	0.115	0.007	0.001	0.002	0.001	0.001	0.002	0.019	0.008	0.009	277.177	0.851	0.5364002	2.841443	0.1436065E-04	2.296365
11292011	13	0.010	0.109	0.007	0.001	0.002	0.001	0.001	0.004	0.017	0.010	0.009	277.232	0.855	0.5979365	2.932318	0.9276463E-05	2.499829
11292011	14	0.010	0.110	0.006	0.002	0.002	0.001	0.001	0.005	0.018	0.010	0.010	277.162	0.868	0.6385983	3.305871	0.9228580E-05	2.554151
11292011	15	0.014	0.107	0.004	0.002	0.003	0.001	0.002	0.006	0.018	0.011	0.011	277.195	0.867	0.7397673	3.521506	0.5954956E-05	2.771850
11292011	16	0.018	0.105	0.003	0.002	0.002	0.001	0.002	0.006	0.015	0.011	0.011	277.204	0.866	0.7310908	3.355594	0.5708477E-05	2.769249
11292011	17	0.023	0.102	0.002	0.002	0.002	0.001	0.002	0.007	0.011	0.009	0.010	277.175	0.868	0.7644103	2.553488	0.2331478E-05	3.039502
11292011	18	0.025	0.095	0.003	0.002	0.002	0.002	0.002	0.008	0.010	0.009	0.010	277.267	0.860	0.7081819	2.058817	0.2074334E-05	2.996739
11292011	19	0.022	0.082	0.004	0.002	0.003	0.001	0.002	0.007	0.012	0.011	0.011	277.454	0.839	0.7103833	2.514864	0.3298250E-05	2.882231
11292011	20	0.016	0.065	0.007	0.002	0.003	0.001	0.002	0.006	0.014	0.012	0.010	277.618	0.811	0.6054565	2.127215	0.3882548E-05	2.738694
11292011	21	0.011	0.052	0.011	0.001	0.002	0.001	0.002	0.005	0.014	0.011	0.009	277.640	0.797	0.4810796	1.831698	0.5229371E-05	2.544404
11292011	22	0.008	0.057	0.015	0.001	0.002	0.001	0.001	0.004	0.013	0.008	0.008	277.619	0.788	0.3687022	1.537432	0.6904459E-05	2.347666
11292011	23	0.006	0.064	0.016	0.001	0.001	0.000	0.001	0.003	0.011	0.005	0.007	277.557	0.783	0.1948546	0.9976501	0.1226219E-04	1.910410
11292011	24	0.005	0.066	0.017	0.000	0.001	0.000	0.001	0.002	0.010	0.004	0.006	277.452	0.777	NaN	1.420549	0.1161554E-01	-0.9125831
