# Supplementary material for: Understanding nitrate formation in a world with less sulfate
Source: Copernicus journal article supplement (doi:10.5194/acp-18-12765-2018), 2018-09-05
Supplement: Supplementary file 2 [file acp-18-12765-2018-supplement.zip › DATA/RAW DATA FOR DIURNALS/data_extract_JST_nov_mod2011.csv]

Date	Hour	NH3	SO2	HNO3	CL	NA	MG	K	CA	NH4	NO3	SO4	T	RH	e_NO3	Water	H+	pH
11022011	01	0.026	0.020	0.018	0.001	0.002	0.002	0.007	0.020	0.017	0.016	0.023	280.062	0.764	0.4976494	1.709917	0.2135275E-05	2.903521
11022011	02	0.020	0.020	0.016	0.001	0.002	0.002	0.007	0.019	0.019	0.019	0.022	279.624	0.789	0.5242345	2.177168	0.3498770E-05	2.793977
11022011	03	0.018	0.020	0.014	0.001	0.002	0.002	0.007	0.018	0.021	0.021	0.022	279.166	0.811	0.5971282	2.943351	0.5345690E-05	2.740838
11022011	04	0.019	0.020	0.012	0.002	0.002	0.002	0.007	0.019	0.025	0.024	0.022	278.808	0.825	0.6726289	3.685689	0.6424310E-05	2.758692
11022011	05	0.027	0.021	0.008	0.002	0.002	0.002	0.007	0.020	0.031	0.029	0.022	278.508	0.837	0.7931533	4.536659	0.6046080E-05	2.875262
11022011	06	0.044	0.024	0.005	0.003	0.002	0.003	0.007	0.022	0.036	0.034	0.022	278.247	0.846	0.8801070	5.463741	0.5980884E-05	2.960725
11022011	07	0.057	0.027	0.003	0.003	0.002	0.004	0.008	0.024	0.040	0.038	0.022	278.043	0.853	0.9172657	5.989726	0.4864287E-05	3.090388
11022011	08	0.053	0.028	0.004	0.003	0.002	0.004	0.009	0.027	0.046	0.043	0.022	278.593	0.815	0.8923574	5.180860	0.4215431E-05	3.089560
11022011	09	0.037	0.027	0.014	0.002	0.002	0.004	0.009	0.026	0.052	0.051	0.022	281.308	0.699	0.6723049	2.516476	0.1984472E-05	3.103148
11022011	10	0.034	0.030	0.031	0.001	0.002	0.003	0.007	0.019	0.039	0.039	0.022	284.656	0.578	0.1902918	0.5453632	0.3298230E-06	3.218405
11022011	11	0.043	0.035	0.050	0.001	0.002	0.002	0.006	0.014	0.027	0.022	0.022	287.613	0.475	0.1011948	0.6449449	0.2107652E-05	2.485724
11022011	12	0.045	0.035	0.066	0.000	0.001	0.002	0.004	0.010	0.023	0.006	0.023	289.515	0.417	NaN	1.400581	0.2015989E-01	-1.158180
11022011	13	0.046	0.029	0.064	0.000	0.001	0.001	0.004	0.009	0.022	0.004	0.022	291.244	0.369	NaN	1.035495	0.1846587E-01	-1.251222
11022011	14	0.050	0.026	0.058	0.000	0.001	0.001	0.004	0.008	0.023	0.003	0.022	291.982	0.353	NaN	1.000711	0.8262197E-02	-0.9167870
11022011	15	0.057	0.026	0.048	0.000	0.001	0.001	0.004	0.008	0.023	0.002	0.022	291.492	0.365	NaN	1.088203	0.2161229E-04	1.702009
11022011	16	0.066	0.026	0.038	0.000	0.001	0.001	0.004	0.008	0.023	0.002	0.022	290.415	0.390	NaN	1.088575	0.8756880E-05	2.094509
11022011	17	0.076	0.026	0.028	0.000	0.001	0.001	0.004	0.008	0.023	0.003	0.022	288.775	0.426	NaN	1.175522	0.6660636E-05	2.246715
11022011	18	0.095	0.027	0.019	0.001	0.001	0.002	0.004	0.011	0.017	0.003	0.022	286.992	0.466	0.1695158	0.7585839	0.5038195E-05	2.177729
11022011	19	0.118	0.032	0.016	0.001	0.002	0.002	0.006	0.017	0.006	0.004	0.023	285.344	0.520	0.3176394	0.5895796	0.3274855E-06	3.255350
11022011	20	0.110	0.034	0.017	0.001	0.002	0.002	0.007	0.021	0.005	0.005	0.023	284.101	0.567	0.1269266	0.1586033	0.5380065E-07	3.469525
11022011	21	0.098	0.035	0.020	0.001	0.002	0.002	0.008	0.023	0.003	0.003	0.023	283.148	0.601	0.8272475E-01	0.6786707E-01	0.1692164E-07	3.603217
11022011	22	0.078	0.034	0.018	0.001	0.002	0.002	0.008	0.022	0.007	0.006	0.024	282.426	0.637	0.2918651	0.4239101	0.1774648E-06	3.378162
11022011	23	0.056	0.033	0.015	0.001	0.002	0.002	0.007	0.020	0.010	0.010	0.024	281.808	0.672	0.4150650	0.8483346	0.5737446E-06	3.169848
11022011	24	0.040	0.032	0.012	0.001	0.002	0.002	0.007	0.019	0.015	0.014	0.024	281.238	0.708	0.5043851	1.376909	0.1287722E-05	3.029083
11032011	01	0.030	0.033	0.012	0.001	0.002	0.002	0.007	0.017	0.020	0.016	0.025	280.677	0.746	0.5889868	2.429726	0.3645242E-05	2.823831
11032011	02	0.023	0.035	0.012	0.002	0.002	0.002	0.007	0.017	0.025	0.018	0.026	280.365	0.775	0.6088450	3.169987	0.6105103E-05	2.715364
11032011	03	0.021	0.036	0.011	0.002	0.002	0.002	0.007	0.017	0.028	0.020	0.026	280.190	0.797	0.6482666	3.718537	0.7035810E-05	2.723058
11032011	04	0.022	0.038	0.010	0.002	0.002	0.002	0.007	0.017	0.031	0.023	0.026	280.112	0.816	0.7044618	4.564936	0.8019775E-05	2.755272
11032011	05	0.027	0.040	0.008	0.002	0.002	0.002	0.007	0.017	0.034	0.028	0.026	280.067	0.835	0.7783957	5.894356	0.8903258E-05	2.820887
11032011	06	0.039	0.042	0.005	0.003	0.002	0.003	0.008	0.018	0.034	0.031	0.026	280.036	0.852	0.8652818	6.820992	0.5703987E-05	3.077669
11032011	07	0.048	0.044	0.004	0.003	0.003	0.004	0.009	0.021	0.033	0.031	0.027	280.048	0.866	0.8919642	7.514208	0.5633909E-05	3.125073
11032011	08	0.048	0.045	0.005	0.003	0.003	0.004	0.010	0.025	0.030	0.027	0.027	280.769	0.855	0.8145640	5.027396	0.4828476E-05	3.017533
11032011	09	0.045	0.044	0.014	0.002	0.003	0.004	0.010	0.027	0.023	0.022	0.026	283.981	0.765	0.3118534	0.9498526	0.1265921E-05	2.875250
11032011	10	0.038	0.037	0.023	0.002	0.003	0.003	0.008	0.019	0.013	0.012	0.025	287.577	0.674	0.1575229	0.8705519	0.1405304E-05	2.792024
11032011	11	0.026	0.026	0.028	0.002	0.002	0.002	0.005	0.011	0.012	0.004	0.020	290.561	0.614	0.4151297E-01	0.9102767	0.1060731E-04	1.933568
11032011	12	0.020	0.017	0.030	0.001	0.002	0.001	0.003	0.006	0.013	0.001	0.016	292.657	0.564	0.1092476E-01	0.8040040	0.5680158E-04	1.150898
11032011	13	0.018	0.014	0.035	0.001	0.002	0.001	0.002	0.006	0.013	0.001	0.015	294.560	0.522	0.5220950E-02	0.6659507	0.6893599E-04	0.9849961
11032011	14	0.015	0.009	0.031	0.001	0.002	0.001	0.002	0.005	0.011	0.001	0.013	295.254	0.518	0.3792346E-02	0.5962255	0.6280231E-04	0.9774349
11032011	15	0.015	0.010	0.022	0.001	0.002	0.001	0.002	0.005	0.012	0.001	0.013	293.717	0.561	0.6251454E-02	0.6674286	0.5578004E-04	1.077926
11032011	16	0.027	0.015	0.014	0.001	0.002	0.001	0.002	0.007	0.009	0.001	0.014	291.818	0.628	0.2004147E-01	0.7302317	0.2059032E-04	1.549798
11032011	17	0.040	0.021	0.012	0.001	0.002	0.002	0.003	0.011	0.003	0.001	0.016	290.069	0.730	0.1180093	0.8708249	0.1542859E-05	2.751605
11032011	18	0.039	0.002	0.009	0.000	0.001	0.001	0.002	0.005	0.014	0.001	0.014	287.952	0.875	NaN	4.409678	0.1991986E-04	2.345121
11032011	19	0.026	0.005	0.010	0.001	0.001	0.001	0.001	0.001	0.013	0.002	0.008	286.964	0.914	0.2788724	3.490231	0.1468851E-04	2.375876
11032011	20	0.020	0.009	0.010	0.002	0.002	0.001	0.002	0.003	0.020	0.005	0.013	285.929	0.924	0.4107220	6.185997	0.2600390E-04	2.376371
11032011	21	0.012	0.010	0.010	0.003	0.002	0.001	0.003	0.005	0.028	0.008	0.019	284.479	0.922	0.4145814	8.301048	0.5754259E-04	2.159143
11032011	22	0.009	0.010	0.009	0.004	0.003	0.001	0.003	0.006	0.029	0.008	0.020	283.381	0.910	0.4218135	7.366292	0.5438423E-04	2.131776
11032011	23	0.006	0.008	0.008	0.004	0.003	0.001	0.003	0.005	0.027	0.005	0.020	282.893	0.891	0.2801907	5.392348	0.7871108E-04	1.835742
11032011	24	0.005	0.007	0.007	0.004	0.002	0.001	0.002	0.004	0.021	0.003	0.017	282.144	0.877	0.1648366	3.928750	0.1103414E-03	1.551516
11042011	01	0.007	0.007	0.008	0.004	0.002	0.001	0.002	0.004	0.012	0.002	0.012	281.322	0.853	0.1849676	2.148342	0.3130236E-04	1.836526
11042011	02	0.007	0.008	0.009	0.002	0.002	0.001	0.002	0.004	0.005	0.002	0.008	280.484	0.836	0.2012585	1.214939	0.6840200E-05	2.249486
11042011	03	0.007	0.010	0.009	0.002	0.002	0.001	0.002	0.004	0.003	0.003	0.007	279.876	0.840	0.2314622	1.089943	0.3833634E-05	2.453793
11042011	04	0.008	0.011	0.009	0.002	0.002	0.001	0.002	0.004	0.003	0.003	0.007	279.716	0.843	0.2543401	1.131999	0.3678881E-05	2.488130
11042011	05	0.011	0.012	0.009	0.002	0.003	0.001	0.002	0.004	0.005	0.004	0.007	279.639	0.845	0.3556938	1.452484	0.3917804E-05	2.569068
11042011	06	0.017	0.013	0.009	0.001	0.003	0.001	0.002	0.005	0.005	0.005	0.007	279.650	0.840	0.3600479	1.135277	0.2298308E-05	2.693694
11042011	07	0.022	0.012	0.008	0.002	0.003	0.002	0.003	0.008	0.003	0.006	0.007	279.632	0.844	0.4245358	0.9559984	0.1341894E-05	2.852739
11042011	08	0.021	0.014	0.008	0.002	0.003	0.002	0.004	0.009	0.005	0.007	0.008	280.071	0.841	0.4091766	0.9781362	0.1439405E-05	2.832216
11042011	09	0.021	0.014	0.011	0.002	0.003	0.001	0.004	0.009	0.003	0.005	0.008	282.015	0.772	0.2501996	0.4211676	0.3355191E-06	3.098738
11042011	10	0.018	0.010	0.017	0.001	0.002	0.001	0.003	0.007	0.001	0.002	0.008	284.738	0.665	0.2186233E-01	0.9461483E-01	0.1200779E-06	2.896496
11042011	11	0.016	0.011	0.022	0.001	0.002	0.001	0.002	0.005	0.004	0.002	0.009	286.671	0.615	0.4135472E-01	0.4652746	0.4709563E-05	1.994729
11042011	12	0.014	0.014	0.022	0.001	0.001	0.001	0.001	0.003	0.006	0.001	0.008	287.886	0.589	0.1630807E-01	0.4897627	0.2178240E-04	1.351880
11042011	13	0.014	0.017	0.022	0.001	0.001	0.000	0.001	0.003	0.010	0.001	0.010	288.714	0.575	0.1090342E-01	0.5515501	0.7539442E-04	0.8642457
11042011	14	0.015	0.020	0.024	0.001	0.001	0.001	0.001	0.003	0.018	0.001	0.014	289.028	0.572	0.2105683E-01	0.9373849	0.8547281E-04	1.040090
11042011	15	0.016	0.023	0.026	0.001	0.001	0.001	0.002	0.004	0.026	0.001	0.019	288.645	0.586	0.3569633E-01	1.317574	0.1010402E-03	1.115281
11042011	16	0.019	0.026	0.026	0.001	0.001	0.001	0.002	0.004	0.033	0.002	0.022	288.003	0.605	0.6321591E-01	1.693125	0.9606840E-04	1.246108
11042011	17	0.023	0.026	0.023	0.001	0.001	0.001	0.002	0.005	0.038	0.002	0.026	286.944	0.628	0.1094900	2.119079	0.9102740E-04	1.366975
11042011	18	0.041	0.028	0.017	0.001	0.001	0.001	0.003	0.009	0.037	0.004	0.029	285.786	0.657	0.2553008	2.335318	0.3570358E-04	1.815634
11042011	19	0.059	0.033	0.013	0.001	0.002	0.002	0.004	0.014	0.037	0.009	0.032	284.938	0.693	0.4538534	2.687485	0.1325755E-04	2.306883
11042011	20	0.060	0.037	0.011	0.002	0.002	0.002	0.005	0.016	0.047	0.017	0.036	284.251	0.722	0.5847502	3.669082	0.1246110E-04	2.469001
11042011	21	0.052	0.038	0.011	0.002	0.002	0.002	0.006	0.017	0.057	0.021	0.041	283.550	0.744	0.6506382	4.822162	0.1714632E-04	2.449071
11042011	22	0.040	0.038	0.010	0.002	0.002	0.002	0.006	0.017	0.065	0.023	0.044	282.687	0.775	0.7020294	6.446708	0.2504774E-04	2.410569
11042011	23	0.028	0.037	0.010	0.002	0.002	0.002	0.006	0.017	0.072	0.025	0.046	282.022	0.792	0.6963146	7.204261	0.3508200E-04	2.312505
11042011	24	0.018	0.035	0.012	0.003	0.002	0.002	0.006	0.016	0.078	0.026	0.047	281.137	0.831	0.7088603	9.777366	0.5779996E-04	2.228294
11052011	01	0.009	0.034	0.015	0.003	0.002	0.002	0.006	0.014	0.086	0.028	0.048	280.476	0.852	0.6582828	11.96684	0.1135857E-03	2.022656
11052011	02	0.004	0.035	0.021	0.002	0.002	0.002	0.006	0.012	0.092	0.026	0.050	279.821	0.873	0.5760670	14.50749	0.2517132E-03	1.760686
11052011	03	0.002	0.037	0.026	0.002	0.002	0.002	0.006	0.011	0.095	0.024	0.053	279.382	0.883	0.4613914	15.92662	0.5224538E-03	1.484076
11052011	04	0.001	0.038	0.031	0.002	0.002	0.002	0.006	0.011	0.099	0.020	0.057	278.990	0.892	0.3900298	17.74570	0.9137525E-03	1.288265
11052011	05	0.001	0.039	0.029	0.002	0.002	0.002	0.006	0.012	0.106	0.022	0.060	278.722	0.895	0.4490802	20.93916	0.9370807E-03	1.349182
11052011	06	0.002	0.040	0.020	0.002	0.003	0.002	0.006	0.014	0.119	0.031	0.063	278.550	0.893	0.6468873	21.78489	0.4561893E-03	1.679010
11052011	07	0.006	0.041	0.010	0.004	0.003	0.002	0.007	0.016	0.132	0.044	0.065	278.421	0.891	0.8311085	25.02957	0.2022336E-03	2.092600
11052011	08	0.011	0.043	0.007	0.005	0.003	0.003	0.008	0.019	0.139	0.059	0.065	278.814	0.858	0.8792261	21.04700	0.9502049E-04	2.345373
11052011	09	0.015	0.040	0.016	0.005	0.003	0.003	0.009	0.020	0.137	0.068	0.062	281.762	0.709	0.7180475	8.949335	0.4892319E-04	2.262276
11052011	10	0.022	0.026	0.027	0.003	0.003	0.002	0.007	0.013	0.090	0.046	0.041	283.709	0.613	0.4888878	3.865887	0.2430397E-04	2.201572
11052011	11	0.035	0.019	0.029	0.002	0.002	0.001	0.004	0.007	0.046	0.024	0.022	285.391	0.537	0.2310727	1.421715	0.1250351E-04	2.055780
11052011	12	0.042	0.017	0.033	0.001	0.001	0.001	0.003	0.006	0.030	0.014	0.017	286.831	0.476	0.1023539	0.7704037	0.1185155E-04	1.812943
11052011	13	0.058	0.015	0.043	0.000	0.001	0.001	0.003	0.005	0.015	0.004	0.013	288.235	0.418	NaN	1.063146	0.4488998E-05	2.374444
11052011	14	0.072	0.014	0.046	0.000	0.001	0.001	0.002	0.005	0.009	0.002	0.011	288.859	0.382	NaN	0.8028833	0.1377970E-05	2.765413
11052011	15	0.089	0.013	0.043	0.000	0.001	0.001	0.002	0.005	0.006	0.002	0.009	288.292	0.376	NaN	0.6820066	0.4030191E-06	3.228463
11052011	16	0.111	0.012	0.038	0.000	0.001	0.001	0.002	0.005	0.004	0.002	0.009	287.279	0.383	NaN	0.6290706	0.2406577E-06	3.417300
11052011	17	0.133	0.012	0.032	0.000	0.001	0.001	0.002	0.006	0.003	0.003	0.008	285.806	0.395	NaN	0.5238054	0.7479922E-07	3.845273
11052011	18	0.149	0.013	0.020	0.000	0.001	0.001	0.003	0.007	0.007	0.007	0.008	284.190	0.411	NaN	0.3603680	0.2237143E-07	4.207053
11052011	19	0.165	0.016	0.006	0.001	0.001	0.002	0.004	0.011	0.010	0.018	0.008	282.892	0.435	NaN	0.9019714	0.6871186E-07	4.118161
11052011	20	0.160	0.017	0.000	0.003	0.001	0.002	0.004	0.012	0.012	0.028	0.008	282.304	0.454	NaN	1.188640	0.9272402E-07	4.107858
11052011	21	0.131	0.015	0.001	0.003	0.001	0.002	0.004	0.011	0.012	0.025	0.008	281.784	0.486	NaN	1.216504	0.1235658E-06	3.993215
11052011	22	0.085	0.013	0.012	0.001	0.001	0.002	0.004	0.009	0.007	0.007	0.008	281.383	0.519	0.4202503E-01	0.1948173E-01	0.2230815E-08	3.941164
11052011	23	0.052	0.012	0.014	0.001	0.001	0.001	0.003	0.007	0.001	0.001	0.008	281.026	0.551	0.5650192E-01	0.5486720E-01	0.3275884E-07	3.223984
11052011	24	0.039	0.012	0.014	0.001	0.001	0.001	0.003	0.006	0.002	0.002	0.008	280.698	0.581	0.1483872	0.1945571	0.2562312E-06	2.880415
11062011	01	0.038	0.012	0.016	0.001	0.001	0.001	0.003	0.005	0.005	0.005	0.007	280.370	0.611	0.2082379	0.2995562	0.3090341E-06	2.986472
11062011	02	0.038	0.013	0.017	0.001	0.001	0.001	0.003	0.005	0.009	0.009	0.007	280.172	0.633	0.3015106	0.4716518	0.3893152E-06	3.083320
11062011	03	0.037	0.015	0.017	0.001	0.001	0.001	0.003	0.005	0.012	0.012	0.007	280.147	0.644	0.3532277	0.5976880	0.4662249E-06	3.107879
11062011	04	0.037	0.016	0.017	0.001	0.001	0.001	0.003	0.005	0.013	0.013	0.007	280.204	0.651	0.3768408	0.6746665	0.5278081E-06	3.106613
11062011	05	0.038	0.017	0.017	0.001	0.002	0.001	0.003	0.005	0.013	0.013	0.007	280.301	0.656	0.3908976	0.7274780	0.5743607E-06	3.102635
11062011	06	0.040	0.018	0.017	0.001	0.002	0.001	0.003	0.005	0.013	0.013	0.007	280.465	0.659	0.3934470	0.7311232	0.5601878E-06	3.115657
11062011	07	0.043	0.019	0.017	0.001	0.002	0.001	0.003	0.006	0.012	0.012	0.007	280.647	0.661	0.3299934	0.5214193	0.3094655E-06	3.226575
11062011	08	0.049	0.020	0.017	0.001	0.002	0.001	0.003	0.008	0.010	0.010	0.007	281.294	0.655	0.3445800	0.4801864	0.2284025E-06	3.322709
11062011	09	0.050	0.020	0.017	0.001	0.002	0.001	0.004	0.009	0.007	0.009	0.008	283.553	0.613	0.2208352E-03	0.2140693E-03	0.1053861E-09	3.307771
11062011	10	0.042	0.017	0.021	0.001	0.002	0.001	0.003	0.006	0.003	0.003	0.008	286.054	0.568	0.4687130E-01	0.1454406	0.2798935E-06	2.715693
11062011	11	0.032	0.013	0.019	0.002	0.002	0.001	0.002	0.005	0.002	0.002	0.007	288.131	0.539	0.3403378E-01	0.1560449	0.6707396E-06	2.366696
11062011	12	0.030	0.010	0.020	0.002	0.002	0.001	0.002	0.004	0.002	0.002	0.007	289.834	0.513	0.3999007E-01	0.2699736	0.7283973E-06	2.568953
11062011	13	0.031	0.010	0.023	0.001	0.002	0.001	0.002	0.004	0.001	0.001	0.007	291.207	0.489	0.3070736E-01	0.2514565	0.6972102E-06	2.557099
11062011	14	0.034	0.009	0.024	0.001	0.002	0.001	0.002	0.004	0.001	0.001	0.007	291.707	0.486	0.2966064E-01	0.2515372	0.6602551E-06	2.580890
11062011	15	0.037	0.008	0.022	0.001	0.002	0.001	0.002	0.004	0.001	0.001	0.006	291.157	0.512	0.2079368E-01	0.1357367	0.6090157E-06	2.348069
11062011	16	0.043	0.008	0.019	0.001	0.002	0.001	0.002	0.004	0.001	0.001	0.006	290.158	0.553	0.3072083E-01	0.1581439	0.5599288E-06	2.450920
11062011	17	0.053	0.008	0.015	0.001	0.002	0.001	0.002	0.005	0.001	0.001	0.007	288.776	0.597	0.5386811E-01	0.1975545	0.4872248E-06	2.607958
11062011	18	0.055	0.008	0.011	0.001	0.002	0.001	0.003	0.007	0.000	0.000	0.007	287.729	0.646	0.000000	0.8435670E-08	0.4493040E-18	7.273579
11062011	19	0.056	0.008	0.005	0.002	0.002	0.002	0.003	0.010	0.000	0.006	0.008	286.546	0.704	0.1988347	0.1743028	0.3513510E-07	3.695563
11062011	20	0.056	0.010	0.000	0.003	0.002	0.002	0.004	0.013	0.000	0.016	0.008	285.336	0.767	NaN	2.449240	0.1283088E-09	7.280775
11062011	21	0.052	0.009	0.000	0.004	0.002	0.002	0.005	0.014	0.000	0.019	0.009	284.578	0.806	NaN	3.314013	0.6425153E-06	3.712471
11062011	22	0.046	0.009	0.000	0.004	0.002	0.002	0.005	0.014	0.000	0.020	0.008	283.846	0.840	NaN	4.032810	0.3969876E-06	4.006831
11062011	23	0.038	0.008	0.000	0.004	0.002	0.002	0.005	0.013	0.001	0.021	0.008	283.302	0.861	NaN	4.660336	0.2136044E-05	3.338807
11062011	24	0.031	0.008	0.000	0.004	0.002	0.002	0.005	0.014	0.001	0.022	0.007	282.858	0.875	NaN	5.564415	0.6646060E-06	3.922855
11072011	01	0.024	0.008	0.000	0.004	0.002	0.002	0.005	0.015	0.000	0.024	0.007	282.419	0.890	NaN	6.410860	0.9056608E-06	3.849951
11072011	02	0.020	0.008	0.000	0.004	0.002	0.002	0.005	0.015	0.001	0.026	0.007	282.050	0.899	NaN	7.462630	0.3563943E-05	3.320961
11072011	03	0.017	0.009	0.000	0.005	0.002	0.002	0.005	0.016	0.003	0.028	0.007	281.746	0.907	NaN	9.093472	0.5568016E-05	3.213029
11072011	04	0.015	0.009	0.000	0.005	0.002	0.002	0.005	0.016	0.006	0.031	0.007	281.502	0.913	NaN	9.925359	0.1077403E-04	2.964368
11072011	05	0.018	0.010	0.000	0.006	0.002	0.002	0.006	0.017	0.008	0.034	0.007	281.306	0.918	NaN	12.35230	0.1012051E-04	3.086546
11072011	06	0.029	0.012	0.000	0.007	0.002	0.002	0.006	0.019	0.008	0.038	0.007	281.197	0.918	NaN	13.88516	0.7219521E-05	3.284043
11072011	07	0.050	0.015	0.000	0.007	0.003	0.003	0.007	0.022	0.004	0.042	0.008	281.043	0.923	NaN	14.98502	0.2244215E-05	3.824593
11072011	08	0.069	0.018	0.000	0.008	0.003	0.004	0.008	0.027	0.001	0.048	0.008	281.546	0.895	NaN	14.03279	0.6714901E-09	7.320104
11072011	09	0.061	0.019	0.000	0.009	0.003	0.005	0.009	0.030	0.007	0.064	0.008	284.629	0.780	NaN	9.413680	0.1670868E-05	3.750817
11072011	10	0.025	0.017	0.000	0.010	0.003	0.004	0.008	0.024	0.030	0.071	0.008	287.830	0.679	NaN	6.754710	0.1309210E-04	2.712598
11072011	11	0.013	0.019	0.010	0.007	0.002	0.002	0.005	0.012	0.026	0.038	0.008	290.439	0.609	NaN	3.075961	0.7563546E-04	1.609255
11072011	12	0.024	0.023	0.032	0.002	0.002	0.001	0.003	0.007	0.001	0.002	0.008	292.279	0.549	0.3059685E-02	0.3290373E-01	0.2480773E-07	3.122658
11072011	13	0.022	0.022	0.036	0.001	0.002	0.001	0.002	0.006	0.001	0.002	0.008	293.881	0.504	0.8398056E-02	0.1280310	0.9282694E-06	2.139641
11072011	14	0.024	0.019	0.039	0.001	0.001	0.001	0.002	0.006	0.001	0.001	0.007	294.484	0.489	0.1611531E-02	0.1980229E-01	0.1026081E-07	3.285534
11072011	15	0.029	0.017	0.038	0.001	0.001	0.001	0.002	0.006	0.001	0.001	0.007	293.835	0.507	0.2126575E-02	0.2356506E-01	0.1267374E-07	3.269364
11072011	16	0.035	0.016	0.034	0.001	0.001	0.001	0.002	0.006	0.001	0.001	0.007	292.638	0.542	0.3347576E-02	0.3070855E-01	0.1814350E-07	3.228538
11072011	17	0.045	0.015	0.025	0.001	0.001	0.001	0.002	0.006	0.001	0.001	0.007	290.943	0.589	0.7778168E-02	0.4804032E-01	0.2761323E-07	3.240489
11072011	18	0.071	0.018	0.008	0.002	0.001	0.002	0.003	0.011	0.001	0.010	0.007	288.962	0.647	NaN	1.610448	0.7419110E-06	3.336595
11072011	19	0.103	0.024	0.000	0.004	0.002	0.003	0.006	0.020	0.001	0.024	0.008	287.175	0.716	NaN	3.062318	0.1677323E-09	7.261434
11072011	20	0.108	0.026	0.000	0.005	0.002	0.003	0.007	0.024	0.001	0.030	0.009	285.859	0.761	NaN	4.313524	0.2302349E-09	7.272661
11072011	21	0.110	0.025	0.000	0.005	0.002	0.003	0.007	0.024	0.001	0.030	0.009	284.937	0.802	NaN	4.938128	0.2599850E-09	7.278614
11072011	22	0.106	0.024	0.000	0.005	0.002	0.003	0.007	0.023	0.001	0.031	0.009	284.315	0.824	NaN	5.676068	0.2947873E-09	7.284539
11072011	23	0.094	0.022	0.000	0.005	0.002	0.003	0.007	0.022	0.001	0.033	0.009	283.842	0.839	NaN	6.561924	0.3368077E-09	7.289649
11072011	24	0.074	0.020	0.000	0.005	0.002	0.003	0.007	0.021	0.001	0.033	0.008	283.247	0.876	NaN	8.233129	0.4205954E-09	7.291700
11082011	01	0.052	0.018	0.000	0.005	0.002	0.002	0.007	0.020	0.001	0.032	0.008	283.129	0.889	NaN	8.284570	0.4245929E-09	7.290297
11082011	02	0.035	0.017	0.000	0.006	0.002	0.002	0.006	0.018	0.001	0.030	0.008	282.821	0.904	NaN	9.043266	0.2966736E-05	3.484046
11082011	03	0.026	0.017	0.000	0.006	0.002	0.002	0.006	0.018	0.001	0.029	0.008	282.599	0.909	NaN	9.644297	0.3110228E-05	3.491478
11082011	04	0.022	0.018	0.000	0.007	0.002	0.002	0.006	0.017	0.004	0.030	0.008	282.419	0.910	NaN	10.40803	0.9033019E-05	3.061536
11082011	05	0.023	0.019	0.000	0.007	0.002	0.002	0.007	0.017	0.009	0.035	0.008	282.239	0.910	NaN	11.72565	0.1246738E-04	2.973362
11082011	06	0.032	0.022	0.000	0.008	0.003	0.002	0.007	0.018	0.014	0.042	0.008	282.052	0.911	NaN	13.98676	0.1239299E-04	3.052541
11082011	07	0.049	0.025	0.000	0.009	0.003	0.003	0.008	0.021	0.017	0.050	0.009	281.840	0.914	NaN	16.55863	0.8520265E-05	3.288571
11082011	08	0.063	0.030	0.000	0.009	0.003	0.004	0.009	0.025	0.020	0.062	0.010	282.200	0.894	NaN	16.30860	0.6852008E-05	3.376599
11082011	09	0.051	0.032	0.000	0.011	0.003	0.005	0.010	0.028	0.041	0.088	0.011	284.920	0.804	NaN	12.63999	0.1217251E-04	3.016366
11082011	10	0.013	0.030	0.000	0.011	0.003	0.004	0.009	0.024	0.073	0.111	0.011	287.951	0.714	NaN	9.699115	0.7501198E-04	2.111601
11082011	11	0.015	0.041	0.018	0.007	0.003	0.002	0.007	0.015	0.053	0.071	0.011	290.921	0.625	NaN	4.633750	0.6058423E-02	-0.1164270
11082011	12	0.040	0.056	0.047	0.002	0.003	0.002	0.004	0.009	0.004	0.005	0.012	292.782	0.572	0.1893610E-01	0.2158862	0.6733587E-06	2.505978
11082011	13	0.028	0.049	0.040	0.002	0.002	0.001	0.003	0.007	0.004	0.004	0.011	294.100	0.542	0.1268023E-01	0.3340198	0.2102300E-05	2.201077
11082011	14	0.025	0.042	0.042	0.002	0.002	0.001	0.003	0.007	0.003	0.003	0.011	294.663	0.532	0.9706378E-02	0.3210148	0.2378104E-05	2.130294
11082011	15	0.024	0.036	0.039	0.002	0.002	0.001	0.003	0.006	0.003	0.003	0.010	293.961	0.553	0.1178533E-01	0.3425323	0.2429223E-05	2.149234
11082011	16	0.024	0.032	0.032	0.002	0.002	0.001	0.003	0.006	0.006	0.003	0.012	292.531	0.587	0.1295322E-01	0.5518932	0.1297974E-04	1.628589
11082011	17	0.037	0.030	0.022	0.002	0.002	0.001	0.003	0.008	0.006	0.003	0.014	290.859	0.628	0.3445196E-01	0.6420538	0.7291003E-05	1.944784
11082011	18	0.069	0.033	0.012	0.002	0.003	0.002	0.005	0.014	0.002	0.004	0.014	289.080	0.687	0.000000	0.7201666E-08	0.4186230E-18	7.235610
11082011	19	0.087	0.037	0.000	0.005	0.003	0.003	0.007	0.022	0.001	0.020	0.013	287.483	0.747	NaN	3.162407	0.1792517E-09	7.246554
11082011	20	0.093	0.037	0.000	0.006	0.003	0.003	0.008	0.027	0.001	0.027	0.012	286.299	0.784	NaN	4.389936	0.2423711E-09	7.257977
11082011	21	0.097	0.035	0.000	0.006	0.003	0.003	0.009	0.028	0.001	0.031	0.012	285.531	0.807	NaN	5.458429	0.2958009E-09	7.266068
11082011	22	0.089	0.033	0.000	0.006	0.003	0.003	0.009	0.026	0.001	0.031	0.012	284.877	0.831	NaN	6.139504	0.3281691E-09	7.272036
11082011	23	0.073	0.031	0.000	0.006	0.003	0.003	0.008	0.023	0.001	0.028	0.012	284.347	0.850	NaN	6.400872	0.3381078E-09	7.277184
11082011	24	0.053	0.032	0.000	0.007	0.003	0.003	0.008	0.020	0.002	0.026	0.012	283.973	0.869	NaN	6.802064	0.3575400E-09	7.279316
11092011	01	0.033	0.033	0.000	0.007	0.003	0.002	0.007	0.018	0.004	0.025	0.012	283.521	0.892	NaN	7.572038	0.4689827E-05	3.208056
11092011	02	0.020	0.032	0.000	0.007	0.003	0.002	0.007	0.017	0.004	0.022	0.012	283.214	0.905	NaN	8.379825	0.7223166E-05	3.064507
11092011	03	0.015	0.027	0.000	0.007	0.003	0.002	0.006	0.016	0.004	0.020	0.012	283.076	0.910	NaN	7.965556	0.1257209E-04	2.801809
11092011	04	0.016	0.022	0.000	0.007	0.003	0.002	0.006	0.016	0.004	0.020	0.012	283.007	0.910	NaN	7.965833	0.1157284E-04	2.837791
11092011	05	0.023	0.019	0.000	0.007	0.003	0.002	0.006	0.017	0.003	0.020	0.012	283.006	0.911	NaN	7.895223	0.4899521E-05	3.207211
11092011	06	0.037	0.019	0.000	0.007	0.003	0.002	0.007	0.019	0.002	0.022	0.012	282.788	0.924	NaN	9.184945	0.7354983E-06	4.096495
11092011	07	0.060	0.023	0.000	0.007	0.003	0.003	0.008	0.022	0.002	0.023	0.012	282.923	0.921	NaN	9.409025	0.4858153E-09	7.287074
11092011	08	0.067	0.024	0.000	0.008	0.003	0.004	0.009	0.026	0.002	0.024	0.013	283.399	0.902	NaN	8.039607	0.4195761E-09	7.282424
11092011	09	0.063	0.026	0.000	0.008	0.004	0.005	0.010	0.029	0.003	0.033	0.013	285.946	0.837	NaN	7.058767	0.3966124E-09	7.250362
11092011	10	0.036	0.027	0.000	0.009	0.004	0.004	0.009	0.025	0.008	0.042	0.013	289.243	0.747	NaN	5.882209	0.3423598E-05	3.235058
11092011	11	0.014	0.025	0.016	0.006	0.003	0.002	0.006	0.014	0.015	0.024	0.011	291.547	0.686	NaN	3.354769	0.1593171E-03	1.323400
11092011	12	0.019	0.026	0.031	0.001	0.002	0.001	0.004	0.008	0.002	0.003	0.008	293.038	0.641	0.000000	0.1633838E-08	0.1000070E-13	2.213179
11092011	13	0.019	0.020	0.033	0.001	0.002	0.001	0.003	0.007	0.001	0.002	0.007	294.118	0.606	0.000000	0.1604439E-08	0.1000002E-13	2.205322
11092011	14	0.017	0.016	0.040	0.001	0.002	0.001	0.002	0.006	0.001	0.002	0.007	294.699	0.596	0.2275229E-02	0.4763899E-01	0.4462503E-07	3.028384
11092011	15	0.020	0.014	0.043	0.001	0.002	0.001	0.002	0.007	0.001	0.001	0.007	293.465	0.620	0.000000	0.1732681E-08	0.1000103E-13	2.238674
11092011	16	0.029	0.020	0.027	0.002	0.002	0.002	0.003	0.011	0.007	0.011	0.008	292.592	0.656	0.5557436E-01	0.1410554	0.4602582E-07	3.486388
11092011	17	0.060	0.029	0.001	0.008	0.002	0.003	0.005	0.019	0.016	0.039	0.010	291.951	0.699	0.9261874	4.217903	0.4788612E-05	2.944887
11092011	18	0.139	0.042	0.000	0.010	0.003	0.005	0.008	0.031	0.001	0.047	0.011	290.648	0.745	NaN	7.174763	0.4633517E-09	7.189897
11092011	19	0.174	0.053	0.000	0.010	0.003	0.006	0.010	0.039	0.001	0.048	0.012	289.435	0.791	NaN	7.964273	0.5041418E-09	7.198594
11092011	20	0.184	0.056	0.000	0.011	0.003	0.006	0.011	0.043	0.001	0.048	0.013	288.602	0.839	NaN	9.928288	0.6251751E-09	7.200873
11092011	21	0.134	0.049	0.000	0.009	0.003	0.005	0.010	0.036	0.001	0.043	0.012	287.948	0.858	NaN	9.619302	0.5959435E-09	7.207939
11092011	22	0.090	0.039	0.000	0.008	0.003	0.004	0.008	0.028	0.001	0.041	0.012	287.098	0.889	NaN	11.56497	0.7035312E-09	7.215861
11092011	23	0.065	0.031	0.000	0.007	0.003	0.003	0.008	0.024	0.002	0.038	0.012	286.884	0.871	NaN	8.947502	0.2048600E-05	3.640245
11092011	24	0.043	0.021	0.000	0.006	0.003	0.003	0.008	0.024	0.002	0.030	0.013	286.070	0.921	NaN	11.15156	0.6607818E-09	7.227278
11102011	01	0.025	0.014	0.005	0.004	0.004	0.003	0.008	0.022	0.005	0.015	0.016	285.974	0.894	NaN	5.893268	0.3426283E-09	7.235533
11102011	02	0.017	0.009	0.008	0.003	0.004	0.003	0.007	0.019	0.005	0.005	0.018	285.247	0.889	0.5429983E-04	0.1740809E-03	0.1012545E-08	2.235337
11102011	03	0.012	0.008	0.009	0.004	0.004	0.002	0.006	0.016	0.005	0.005	0.016	284.319	0.884	0.2849102E-04	0.9022963E-04	0.6013346E-09	2.176233
11102011	04	0.012	0.007	0.013	0.004	0.004	0.002	0.005	0.012	0.004	0.004	0.013	283.336	0.867	0.9596038E-01	0.5728186	0.1215671E-05	2.673201
11102011	05	0.013	0.006	0.014	0.004	0.003	0.001	0.004	0.008	0.005	0.005	0.011	282.295	0.844	0.2273224	1.281834	0.3412776E-05	2.574724
11102011	06	0.017	0.006	0.011	0.002	0.003	0.001	0.003	0.006	0.006	0.006	0.009	281.272	0.817	0.3130206	1.236536	0.2861747E-05	2.635576
11102011	07	0.021	0.006	0.009	0.001	0.003	0.001	0.003	0.006	0.006	0.006	0.009	280.288	0.783	0.3567571	0.9760584	0.1854493E-05	2.721251
11102011	08	0.024	0.007	0.009	0.002	0.003	0.001	0.003	0.007	0.006	0.005	0.010	279.915	0.737	0.3578462	0.7970634	0.1329311E-05	2.777866
11102011	09	0.023	0.007	0.011	0.002	0.003	0.001	0.003	0.007	0.005	0.005	0.010	281.244	0.661	0.2088228	0.4756402	0.1146314E-05	2.617975
11102011	10	0.016	0.011	0.014	0.001	0.003	0.001	0.002	0.006	0.010	0.004	0.012	282.798	0.592	0.1174614	0.6494602	0.7824508E-05	1.919096
11102011	11	0.014	0.014	0.017	0.001	0.002	0.001	0.002	0.005	0.017	0.003	0.015	284.099	0.537	0.7043350E-01	0.8111345	0.3419377E-04	1.375146
11102011	12	0.014	0.015	0.018	0.001	0.002	0.001	0.002	0.004	0.017	0.002	0.014	284.949	0.490	0.4971129E-01	0.6934001	0.3854275E-04	1.255041
11102011	13	0.017	0.014	0.018	0.001	0.002	0.001	0.001	0.004	0.016	0.002	0.013	285.534	0.451	0.4245800E-01	0.5808854	0.3319646E-04	1.242999
11102011	14	0.020	0.014	0.019	0.001	0.001	0.001	0.001	0.004	0.017	0.002	0.013	285.546	0.434	0.4262221E-01	0.5309846	0.3059564E-04	1.239422
11102011	15	0.025	0.014	0.019	0.001	0.001	0.001	0.001	0.004	0.017	0.002	0.013	285.223	0.426	0.5637771E-01	0.5354060	0.2349483E-04	1.357711
11102011	16	0.030	0.016	0.017	0.001	0.001	0.001	0.001	0.004	0.016	0.003	0.012	284.552	0.426	0.7438827E-01	0.4877675	0.1439988E-04	1.529854
11102011	17	0.038	0.018	0.014	0.001	0.001	0.001	0.002	0.004	0.015	0.003	0.012	283.430	0.430	0.1181548	0.4755815	0.8546391E-05	1.745442
11102011	18	0.054	0.022	0.011	0.001	0.001	0.001	0.002	0.006	0.010	0.003	0.012	282.320	0.436	0.1758832	0.3907361	0.2967756E-05	2.119455
11102011	19	0.076	0.027	0.012	0.001	0.001	0.001	0.003	0.010	0.003	0.003	0.012	281.648	0.443	0.1257566	0.9465724E-01	0.1057548E-06	2.951854
11102011	20	0.082	0.029	0.015	0.001	0.002	0.001	0.003	0.012	0.002	0.002	0.012	281.120	0.449	0.5364418E-06	0.1597696E-06	0.1000251E-13	4.203385
11102011	21	0.076	0.031	0.012	0.001	0.002	0.001	0.004	0.011	0.003	0.003	0.013	280.557	0.455	0.1347860	0.6642156E-01	0.2690860E-07	3.392418
11102011	22	0.065	0.031	0.008	0.001	0.002	0.001	0.003	0.009	0.005	0.005	0.013	280.017	0.458	0.3476116	0.3375829	0.4012633E-06	2.924951
11102011	23	0.050	0.030	0.007	0.001	0.002	0.001	0.003	0.007	0.005	0.004	0.011	279.697	0.451	0.3034255	0.3061106	0.5077762E-06	2.780206
11102011	24	0.036	0.028	0.007	0.002	0.002	0.001	0.002	0.006	0.003	0.003	0.009	279.038	0.456	0.2715149	0.2723542	0.3919898E-06	2.841859
11112011	01	0.028	0.027	0.007	0.001	0.002	0.001	0.002	0.006	0.002	0.002	0.008	278.382	0.463	0.1785662	0.1380570	0.3435700E-06	2.604043
11112011	02	0.023	0.027	0.007	0.001	0.002	0.001	0.002	0.005	0.003	0.002	0.008	277.670	0.480	0.2780662	0.2828102	0.5410191E-06	2.718282
11112011	03	0.020	0.028	0.008	0.001	0.002	0.001	0.002	0.005	0.005	0.003	0.009	276.859	0.507	0.2969320	0.3940054	0.1470274E-05	2.428104
11112011	04	0.019	0.030	0.007	0.001	0.002	0.001	0.002	0.005	0.008	0.004	0.010	275.980	0.541	0.3818993	0.5317920	0.2301437E-05	2.363743
11112011	05	0.018	0.034	0.007	0.001	0.002	0.001	0.002	0.005	0.013	0.007	0.011	275.102	0.577	0.5107814	0.7841918	0.2822295E-05	2.443820
11112011	06	0.020	0.038	0.006	0.001	0.002	0.001	0.002	0.005	0.018	0.011	0.011	274.238	0.616	0.6754525	1.074100	0.2071963E-05	2.714663
11112011	07	0.023	0.042	0.005	0.002	0.002	0.001	0.003	0.006	0.023	0.017	0.012	273.352	0.659	0.8089122	1.574305	0.1583598E-05	2.997444
11112011	08	0.025	0.046	0.004	0.003	0.002	0.001	0.003	0.007	0.028	0.023	0.012	273.440	0.644	0.8360029	1.602066	0.9781847E-06	3.214260
11112011	09	0.025	0.048	0.006	0.002	0.002	0.001	0.003	0.008	0.028	0.025	0.013	275.456	0.556	0.7065357	1.088206	0.8028238E-06	3.132091
11112011	10	0.025	0.046	0.011	0.001	0.002	0.001	0.003	0.008	0.023	0.020	0.013	278.158	0.454	0.3991889	0.5115086	0.7270768E-06	2.847273
11112011	11	0.028	0.043	0.018	0.001	0.002	0.001	0.003	0.008	0.017	0.012	0.013	280.907	0.368	0.1639041	0.2930156	0.1262673E-05	2.365600
11112011	12	0.026	0.036	0.023	0.000	0.001	0.001	0.003	0.007	0.014	0.006	0.013	283.441	0.300	NaN	0.3876800	0.1194419E-05	2.511317
11112011	13	0.024	0.028	0.026	0.000	0.001	0.001	0.002	0.006	0.015	0.004	0.014	285.392	0.253	NaN	0.3618675	0.1986841E-02	-0.7396137
11112011	14	0.026	0.023	0.026	0.000	0.001	0.001	0.002	0.005	0.015	0.003	0.013	286.175	0.239	NaN	0.3480261	0.5099971E-05	1.834044
11112011	15	0.029	0.022	0.026	0.000	0.001	0.001	0.002	0.005	0.014	0.003	0.013	285.601	0.256	NaN	0.3844631	0.2899934E-05	2.122467
11112011	16	0.035	0.023	0.026	0.000	0.001	0.001	0.002	0.005	0.013	0.004	0.013	284.575	0.286	NaN	0.4509336	0.2199461E-05	2.311796
11112011	17	0.042	0.026	0.024	0.000	0.001	0.001	0.002	0.006	0.012	0.005	0.012	283.164	0.324	NaN	0.4441933	0.6873482E-06	2.810395
11112011	18	0.053	0.030	0.021	0.000	0.001	0.001	0.003	0.008	0.009	0.006	0.012	281.705	0.368	NaN	0.4485790	0.2505385E-06	3.252964
11112011	19	0.082	0.039	0.012	0.000	0.002	0.002	0.005	0.015	0.011	0.013	0.013	280.521	0.420	NaN	0.3460205	0.1761536E-07	4.293211
11112011	20	0.095	0.047	0.000	0.003	0.002	0.002	0.006	0.020	0.012	0.035	0.014	279.842	0.466	NaN	1.526146	0.1292745E-06	4.072083
11112011	21	0.077	0.053	0.000	0.003	0.002	0.002	0.006	0.020	0.022	0.044	0.013	279.100	0.510	NaN	1.985150	0.2325324E-06	3.931310
11112011	22	0.056	0.059	0.008	0.002	0.002	0.002	0.006	0.018	0.032	0.040	0.013	278.398	0.549	0.7454289	1.059149	0.1641375E-06	3.809749
11112011	23	0.036	0.063	0.016	0.001	0.001	0.002	0.005	0.015	0.035	0.034	0.013	277.681	0.590	0.7130083	1.215809	0.3506814E-06	3.539953
11112011	24	0.025	0.068	0.019	0.001	0.001	0.002	0.004	0.013	0.034	0.034	0.013	276.924	0.635	0.6907179	1.570633	0.9038500E-06	3.239978
11122011	01	0.013	0.072	0.020	0.001	0.001	0.001	0.004	0.011	0.040	0.039	0.012	276.177	0.684	0.6655818	2.110820	0.2390570E-05	2.945950
11122011	02	0.008	0.076	0.025	0.001	0.001	0.001	0.003	0.010	0.042	0.042	0.012	275.561	0.724	0.6275423	2.879202	0.6638486E-05	2.637203
11122011	03	0.005	0.081	0.029	0.001	0.001	0.001	0.003	0.010	0.043	0.043	0.012	275.104	0.750	0.5913637	3.410973	0.1246020E-04	2.437353
11122011	04	0.004	0.087	0.031	0.001	0.001	0.001	0.003	0.009	0.044	0.043	0.012	274.736	0.768	0.5905830	4.119205	0.2001896E-04	2.313372
11122011	05	0.003	0.094	0.031	0.001	0.001	0.001	0.003	0.009	0.046	0.045	0.012	274.398	0.785	0.5972618	4.793421	0.2862920E-04	2.223836
11122011	06	0.003	0.102	0.029	0.001	0.001	0.001	0.003	0.009	0.049	0.048	0.012	274.080	0.801	0.6303459	5.419989	0.3381299E-04	2.204915
11122011	07	0.003	0.109	0.024	0.002	0.001	0.001	0.003	0.010	0.054	0.053	0.012	273.791	0.816	0.6880649	6.563754	0.4164546E-04	2.197585
11122011	08	0.005	0.116	0.019	0.002	0.001	0.001	0.004	0.011	0.061	0.060	0.012	274.420	0.777	0.7493991	5.433972	0.1807115E-04	2.478132
11122011	09	0.010	0.121	0.017	0.002	0.002	0.002	0.004	0.011	0.065	0.063	0.013	276.939	0.670	0.7335871	3.065542	0.3168270E-05	2.985685
11122011	10	0.021	0.126	0.022	0.001	0.002	0.002	0.004	0.012	0.058	0.057	0.014	280.580	0.539	0.5377249	1.194331	0.4431868E-06	3.430538
11122011	11	0.037	0.134	0.034	0.001	0.002	0.002	0.004	0.012	0.044	0.044	0.015	284.188	0.439	0.1637920	0.3165644	0.1861567E-06	3.230583
11122011	12	0.052	0.155	0.049	0.001	0.002	0.002	0.004	0.011	0.025	0.022	0.017	287.307	0.362	0.7452911E-01	0.3550515	0.9975830E-06	2.551342
11122011	13	0.054	0.165	0.063	0.001	0.002	0.001	0.004	0.009	0.017	0.006	0.019	289.769	0.305	0.2631432E-01	0.3772232	0.1341988E-04	1.448850
11122011	14	0.047	0.142	0.058	0.001	0.002	0.001	0.003	0.008	0.018	0.004	0.019	290.623	0.287	0.1775801E-01	0.3934496	0.2521270E-04	1.193270
11122011	15	0.043	0.119	0.054	0.000	0.002	0.001	0.003	0.008	0.018	0.003	0.019	290.135	0.298	NaN	0.6708443	0.1088307E-01	-1.210129
11122011	16	0.043	0.104	0.046	0.000	0.001	0.001	0.003	0.008	0.017	0.003	0.018	289.148	0.319	NaN	0.6881094	0.2817824E-02	-0.6122564
11122011	17	0.046	0.095	0.035	0.001	0.002	0.001	0.003	0.008	0.016	0.003	0.018	287.679	0.346	0.4512733E-01	0.4465427	0.1497296E-04	1.474555
11122011	18	0.069	0.087	0.022	0.001	0.002	0.002	0.004	0.010	0.009	0.002	0.018	285.980	0.379	0.1137503	0.4406965	0.2796030E-05	2.197598
11122011	19	0.101	0.080	0.018	0.001	0.002	0.002	0.005	0.015	0.003	0.003	0.017	284.476	0.422	0.7272297E-01	0.4327007E-01	0.1219604E-07	3.549969
11122011	20	0.102	0.072	0.016	0.001	0.003	0.003	0.007	0.019	0.010	0.010	0.017	283.404	0.463	0.3002286E-03	0.1380449E-03	0.1026592E-10	4.128623
11122011	21	0.095	0.066	0.017	0.001	0.003	0.003	0.007	0.021	0.009	0.011	0.017	282.747	0.497	0.9610361E-01	0.5917840E-01	0.6357681E-08	3.968864
11122011	22	0.075	0.061	0.016	0.001	0.003	0.003	0.008	0.021	0.012	0.014	0.017	282.133	0.520	0.3371243	0.2992573	0.4243591E-07	3.848311
11122011	23	0.054	0.057	0.015	0.002	0.003	0.003	0.007	0.019	0.012	0.012	0.017	281.658	0.535	0.3798991E-01	0.2771302E-01	0.5444151E-08	3.706753
11122011	24	0.042	0.054	0.015	0.002	0.003	0.003	0.007	0.018	0.008	0.008	0.016	280.852	0.566	0.8887053E-04	0.6387986E-04	0.1809212E-10	3.547874
11132011	01	0.033	0.049	0.014	0.002	0.003	0.003	0.007	0.017	0.007	0.007	0.015	280.156	0.597	0.2769758	0.2674977	0.7911456E-07	3.529064
11132011	02	0.027	0.044	0.014	0.002	0.003	0.002	0.007	0.016	0.006	0.006	0.014	279.592	0.621	0.2769267	0.2786550	0.9876265E-07	3.450474
11132011	03	0.023	0.040	0.013	0.001	0.002	0.002	0.006	0.015	0.006	0.006	0.014	279.346	0.638	0.1229048E-03	0.1001821E-03	0.6336992E-10	3.198907
11132011	04	0.021	0.036	0.012	0.001	0.003	0.002	0.006	0.014	0.005	0.005	0.013	279.279	0.643	0.9816885E-04	0.7179200E-04	0.5011651E-10	3.156095
11132011	05	0.022	0.033	0.011	0.001	0.003	0.002	0.006	0.014	0.005	0.005	0.013	279.160	0.659	0.1117587E-03	0.8454652E-04	0.6345400E-10	3.124637
11132011	06	0.027	0.032	0.010	0.001	0.003	0.002	0.006	0.015	0.004	0.006	0.013	279.207	0.658	0.3159930	0.3020670	0.1179766E-06	3.408308
11132011	07	0.035	0.033	0.006	0.002	0.003	0.002	0.007	0.016	0.003	0.011	0.013	279.194	0.673	0.3635826	0.3767883	0.1546304E-06	3.386802
11132011	08	0.046	0.036	0.000	0.003	0.003	0.003	0.007	0.018	0.002	0.022	0.013	279.398	0.698	NaN	2.328417	0.8919447E-10	7.416723
11132011	09	0.051	0.038	0.000	0.004	0.003	0.003	0.008	0.021	0.003	0.032	0.013	282.392	0.621	NaN	2.570990	0.2434695E-06	4.023656
11132011	10	0.043	0.038	0.007	0.005	0.003	0.003	0.008	0.020	0.010	0.033	0.014	285.902	0.537	NaN	2.267963	0.1352992E-05	3.224341
11132011	11	0.036	0.042	0.026	0.001	0.003	0.002	0.006	0.013	0.003	0.004	0.014	288.451	0.493	0.6400585E-02	0.2257724E-01	0.1570722E-07	3.157572
11132011	12	0.029	0.054	0.027	0.001	0.002	0.002	0.004	0.009	0.003	0.003	0.014	290.116	0.475	0.4846609E-01	0.3913880	0.8078260E-06	2.685290
11132011	13	0.024	0.039	0.029	0.001	0.002	0.001	0.003	0.008	0.006	0.002	0.014	291.604	0.457	0.9684741E-02	0.3734926	0.1345050E-04	1.443543
11132011	14	0.022	0.031	0.030	0.001	0.002	0.001	0.003	0.007	0.007	0.001	0.014	292.392	0.459	0.7221282E-02	0.4290503	0.2521590E-04	1.230834
11132011	15	0.022	0.029	0.028	0.001	0.002	0.001	0.003	0.007	0.007	0.001	0.013	292.248	0.484	0.8571744E-02	0.3945168	0.1446057E-04	1.435880
11132011	16	0.022	0.026	0.022	0.001	0.001	0.001	0.003	0.006	0.006	0.001	0.012	291.721	0.519	0.8662760E-02	0.4230801	0.1686190E-04	1.399516
11132011	17	0.028	0.023	0.015	0.001	0.001	0.001	0.003	0.007	0.006	0.001	0.012	290.737	0.561	0.1709116E-01	0.4044561	0.6311115E-05	1.806765
11132011	18	0.057	0.026	0.011	0.001	0.002	0.002	0.004	0.012	0.001	0.001	0.014	289.348	0.617	0.3632736E-01	0.1215698	0.5008415E-07	3.385125
11132011	19	0.073	0.030	0.006	0.003	0.003	0.003	0.007	0.019	0.001	0.010	0.015	287.930	0.698	0.2145924	0.2712129	0.6728175E-07	3.605413
11132011	20	0.063	0.031	0.000	0.007	0.003	0.004	0.008	0.023	0.001	0.020	0.015	287.194	0.755	NaN	3.728573	0.2098827E-09	7.249566
11132011	21	0.046	0.033	0.001	0.006	0.003	0.004	0.007	0.021	0.001	0.014	0.015	286.770	0.778	NaN	3.113499	0.1747257E-09	7.250892
11132011	22	0.037	0.040	0.009	0.003	0.003	0.003	0.007	0.019	0.001	0.003	0.016	286.396	0.793	0.000000	0.3361727E-08	0.1000027E-13	2.526551
11132011	23	0.029	0.047	0.008	0.004	0.003	0.003	0.006	0.016	0.002	0.002	0.017	286.042	0.803	0.5645978E-01	0.2284343	0.1864183E-06	3.088273
11132011	24	0.024	0.046	0.007	0.004	0.003	0.002	0.006	0.014	0.002	0.002	0.018	287.002	0.720	0.1238818	0.5518379	0.8329021E-06	2.821218
11142011	01	0.021	0.035	0.007	0.004	0.003	0.002	0.006	0.014	0.002	0.002	0.018	286.218	0.766	0.1530452	0.7253256	0.1123473E-05	2.809970
11142011	02	0.017	0.025	0.007	0.004	0.003	0.002	0.006	0.014	0.002	0.002	0.017	285.631	0.792	0.1116492	0.5664945	0.5834992E-06	2.987155
11142011	03	0.016	0.020	0.007	0.003	0.003	0.002	0.006	0.014	0.002	0.002	0.017	284.959	0.829	0.1484672	0.7531192	0.8762975E-06	2.934212
11142011	04	0.016	0.016	0.007	0.003	0.003	0.002	0.006	0.015	0.002	0.002	0.016	284.587	0.851	0.6936264E-01	0.3203791	0.4006799E-06	2.902867
11142011	05	0.021	0.015	0.008	0.003	0.003	0.002	0.007	0.016	0.001	0.002	0.016	284.473	0.856	0.3159046E-04	0.5863386E-04	0.3001761E-09	2.290772
11142011	06	0.031	0.017	0.008	0.003	0.003	0.002	0.007	0.018	0.002	0.003	0.016	284.446	0.860	0.3165007E-04	0.6378922E-04	0.2174657E-09	2.467357
11142011	07	0.047	0.022	0.002	0.004	0.003	0.003	0.008	0.021	0.002	0.009	0.016	284.493	0.859	0.3782253	0.9163651	0.8595631E-06	3.027791
11142011	08	0.062	0.022	0.000	0.006	0.004	0.004	0.009	0.026	0.002	0.014	0.016	285.238	0.820	NaN	3.252831	0.1754485E-09	7.268112
11142011	09	0.059	0.020	0.000	0.008	0.004	0.005	0.010	0.030	0.002	0.019	0.017	287.951	0.744	NaN	3.326579	0.1919363E-09	7.238841
11142011	10	0.042	0.017	0.000	0.010	0.004	0.005	0.010	0.031	0.002	0.029	0.017	290.907	0.674	NaN	4.011459	0.2490323E-09	7.207047
11142011	11	0.025	0.036	0.007	0.010	0.003	0.003	0.007	0.022	0.004	0.023	0.016	293.505	0.607	0.1000000	0.1753618	0.3140920E-07	3.746878
11142011	12	0.016	0.054	0.020	0.003	0.002	0.001	0.003	0.009	0.001	0.002	0.012	295.328	0.568	0.1338428E-01	0.2484414	0.8110804E-06	2.486160
11142011	13	0.014	0.046	0.024	0.002	0.002	0.001	0.002	0.006	0.004	0.001	0.011	296.971	0.527	0.2359569E-02	0.4024840	0.2123682E-04	1.277659
11142011	14	0.012	0.038	0.025	0.001	0.002	0.001	0.002	0.004	0.007	0.001	0.010	297.563	0.515	0.2659142E-02	0.4598928	0.2691801E-04	1.232614
11142011	15	0.013	0.030	0.019	0.001	0.001	0.001	0.001	0.004	0.007	0.001	0.010	297.147	0.525	0.3345907E-02	0.4766402	0.2887064E-04	1.217734
11142011	16	0.017	0.030	0.016	0.001	0.002	0.001	0.002	0.004	0.007	0.001	0.010	296.288	0.548	0.3822386E-02	0.4994071	0.2667884E-04	1.272288
11142011	17	0.033	0.030	0.012	0.002	0.002	0.001	0.002	0.008	0.002	0.001	0.011	294.654	0.589	0.3317070E-01	0.3249462	0.5326658E-06	2.785357
11142011	18	0.060	0.032	0.003	0.004	0.002	0.003	0.005	0.018	0.000	0.011	0.012	292.758	0.635	NaN	1.758011	0.1141624E-09	7.187499
11142011	19	0.073	0.035	0.000	0.009	0.003	0.004	0.007	0.025	0.001	0.021	0.013	291.810	0.667	NaN	3.102293	0.1987470E-09	7.193382
11142011	20	0.046	0.028	0.000	0.010	0.003	0.003	0.006	0.023	0.001	0.018	0.012	291.155	0.702	NaN	3.201810	0.2049171E-09	7.193817
11142011	21	0.034	0.020	0.000	0.010	0.003	0.003	0.006	0.018	0.000	0.015	0.011	290.900	0.721	NaN	3.076308	0.1974680E-09	7.192533
11142011	22	0.027	0.013	0.001	0.008	0.003	0.002	0.005	0.015	0.001	0.012	0.011	290.730	0.739	0.2307692	0.3022452	0.1349848E-06	3.350075
11142011	23	0.021	0.013	0.006	0.004	0.003	0.002	0.005	0.014	0.001	0.004	0.011	290.615	0.756	0.3000000	0.3233723	0.1369297E-06	3.373205
11142011	24	0.016	0.017	0.007	0.004	0.003	0.002	0.005	0.012	0.001	0.002	0.012	290.377	0.777	0.000000	0.9472716E-09	0.1000002E-13	1.976474
11152011	01	0.014	0.022	0.006	0.004	0.003	0.001	0.005	0.010	0.001	0.001	0.013	289.805	0.824	0.7206440E-01	0.6149565	0.9046472E-06	2.832365
11152011	02	0.013	0.024	0.005	0.003	0.003	0.001	0.005	0.010	0.001	0.001	0.013	289.186	0.864	0.9908766E-01	0.8068873	0.1168130E-05	2.839322
11152011	03	0.013	0.019	0.005	0.003	0.003	0.001	0.004	0.010	0.001	0.001	0.012	288.684	0.902	0.9596884E-01	0.8189718	0.1042673E-05	2.895121
11152011	04	0.015	0.013	0.005	0.002	0.003	0.001	0.004	0.010	0.001	0.001	0.011	288.401	0.929	0.8985603E-01	0.7115228	0.9598759E-06	2.869974
11152011	05	0.018	0.014	0.006	0.002	0.003	0.001	0.004	0.011	0.001	0.001	0.010	288.245	0.941	0.8547306E-04	0.3186316E-03	0.2467870E-08	2.110966
11152011	06	0.025	0.023	0.004	0.003	0.003	0.002	0.004	0.012	0.002	0.004	0.010	288.148	0.956	0.4973060	3.839281	0.7038785E-05	2.736752
11152011	07	0.036	0.034	0.000	0.007	0.003	0.002	0.005	0.015	0.001	0.009	0.011	288.097	0.963	0.5717198	6.295635	0.1396492E-04	2.654001
11152011	08	0.046	0.045	0.000	0.010	0.004	0.003	0.006	0.019	0.001	0.011	0.011	288.967	0.916	NaN	6.935384	0.4633247E-09	7.175185
11152011	09	0.044	0.050	0.000	0.013	0.003	0.004	0.006	0.021	0.001	0.018	0.011	290.925	0.893	NaN	7.765697	0.5553267E-09	7.145632
11152011	10	0.027	0.044	0.001	0.012	0.003	0.003	0.005	0.018	0.003	0.023	0.010	293.515	0.805	0.9166666	4.999179	0.1234485E-05	3.607413
11152011	11	0.017	0.045	0.019	0.004	0.002	0.001	0.003	0.010	0.001	0.004	0.009	295.259	0.744	0.000000	0.6254425E-09	0.4852603E-19	7.110213
11152011	12	0.010	0.042	0.024	0.002	0.002	0.001	0.002	0.005	0.004	0.001	0.009	296.509	0.697	0.4473269E-02	0.5407033	0.1182489E-04	1.660162
11152011	13	0.008	0.031	0.030	0.001	0.002	0.001	0.001	0.004	0.008	0.001	0.010	296.921	0.662	0.3656566E-02	0.7000518	0.4517978E-04	1.190186
11152011	14	0.012	0.021	0.027	0.001	0.002	0.001	0.001	0.005	0.008	0.001	0.011	296.418	0.673	0.4048586E-02	0.7198495	0.4570950E-04	1.197235
11152011	15	0.022	0.018	0.021	0.001	0.002	0.001	0.002	0.007	0.004	0.000	0.011	295.685	0.713	0.1098943E-01	0.5654965	0.5760356E-05	1.991981
11152011	16	0.027	0.018	0.015	0.001	0.002	0.001	0.002	0.008	0.002	0.001	0.011	295.248	0.754	0.3822279E-01	0.5314978	0.9382267E-06	2.753194
11152011	17	0.046	0.019	0.012	0.001	0.002	0.002	0.003	0.012	0.001	0.003	0.012	294.043	0.806	0.000000	0.1387562E-08	0.1000050E-13	2.142231
11152011	18	0.103	0.032	0.000	0.006	0.003	0.004	0.006	0.025	0.001	0.016	0.013	292.593	0.867	NaN	4.507986	0.3398103E-09	7.122746
11152011	19	0.128	0.044	0.000	0.007	0.003	0.004	0.007	0.030	0.001	0.020	0.013	291.583	0.917	NaN	8.133423	0.6053723E-09	7.128251
11152011	20	0.132	0.050	0.000	0.008	0.003	0.004	0.007	0.031	0.001	0.021	0.013	290.896	0.942	NaN	11.28237	0.8276642E-09	7.134546
11152011	21	0.115	0.051	0.000	0.008	0.003	0.004	0.007	0.027	0.001	0.023	0.012	290.354	0.951	NaN	14.14143	0.1019468E-08	7.142120
11152011	22	0.097	0.051	0.000	0.008	0.003	0.003	0.006	0.024	0.001	0.025	0.011	290.005	0.920	NaN	9.972114	0.6970036E-09	7.155552
11152011	23	0.076	0.053	0.000	0.007	0.003	0.003	0.006	0.021	0.001	0.029	0.010	289.681	0.949	NaN	17.30075	0.1211829E-08	7.154624
11152011	24	0.051	0.052	0.000	0.007	0.003	0.002	0.006	0.020	0.008	0.037	0.010	289.531	0.938	NaN	18.20618	0.1770301E-04	3.012172
11162011	01	0.035	0.044	0.000	0.008	0.003	0.003	0.007	0.021	0.016	0.047	0.010	289.368	0.958	NaN	34.88311	0.4546297E-04	2.884957
11162011	02	0.022	0.029	0.000	0.009	0.003	0.003	0.007	0.022	0.019	0.052	0.009	289.784	0.963	NaN	38.51451	0.8221300E-04	2.670684
11162011	03	0.013	0.015	0.000	0.010	0.003	0.002	0.007	0.019	0.017	0.045	0.009	290.143	0.958	NaN	35.54451	0.2273944E-03	2.193993
11162011	04	0.015	0.009	0.000	0.008	0.004	0.002	0.006	0.016	0.007	0.030	0.008	290.406	0.958	NaN	24.10956	0.5868464E-04	2.613665
11162011	05	0.018	0.008	0.000	0.006	0.004	0.002	0.005	0.012	0.000	0.016	0.007	290.424	0.967	NaN	18.42143	0.1342995E-08	7.137249
11162011	06	0.021	0.011	0.001	0.004	0.003	0.001	0.003	0.009	0.001	0.007	0.007	290.345	0.970	0.4439102	5.025568	0.1140187E-04	2.644209
11162011	07	0.020	0.011	0.004	0.009	0.002	0.001	0.002	0.006	0.011	0.002	0.008	290.316	0.970	0.5051503	9.137254	0.1545561E-04	2.771729
11162011	08	0.019	0.008	0.004	0.010	0.002	0.001	0.001	0.001	0.022	0.002	0.009	290.539	0.965	0.5502192	16.53871	0.3874090E-04	2.630332
11162011	09	0.026	0.009	0.005	0.006	0.001	0.001	0.000	0.001	0.022	0.003	0.010	291.654	0.962	0.3723223	10.57271	0.3201337E-04	2.518855
11162011	10	0.019	0.016	0.009	0.002	0.001	0.001	0.000	0.000	0.016	0.002	0.009	293.868	0.906	0.5009884E-01	3.376224	0.5113147E-04	1.819743
11162011	11	0.001	0.022	0.011	0.000	0.001	0.000	0.000	0.000	0.016	0.000	0.010	294.779	0.885	0.000000	2.947792	0.2159111E-02	0.1352218
11162011	12	0.002	0.015	0.018	0.000	0.001	0.000	0.000	0.000	0.020	0.000	0.012	294.747	0.873	0.000000	3.053993	0.2302352E-02	0.1226964
11162011	13	0.002	0.012	0.018	0.000	0.001	0.000	0.000	0.000	0.019	0.000	0.011	295.254	0.879	0.3023982E-02	3.040055	0.9270944E-03	0.5157574
11162011	14	0.001	0.008	0.012	0.000	0.001	0.000	0.000	0.000	0.014	0.000	0.009	294.785	0.893	0.000000	2.648390	0.2033271E-02	0.1147868
11162011	15	0.001	0.007	0.010	0.000	0.000	0.000	0.000	0.000	0.015	0.000	0.009	294.644	0.894	0.6397188E-02	2.639863	0.6861500E-03	0.5851623
11162011	16	0.003	0.009	0.009	0.000	0.000	0.000	0.000	0.000	0.015	0.000	0.009	293.965	0.904	0.2877504E-01	2.950819	0.2589756E-03	1.056684
11162011	17	0.014	0.014	0.008	0.000	0.000	0.001	0.000	0.000	0.016	0.000	0.009	292.797	0.922	NaN	6.026199	0.1734936E-03	1.540760
11162011	18	0.015	0.022	0.006	0.000	0.000	0.001	0.000	0.000	0.018	0.000	0.010	291.355	0.933	NaN	6.731373	0.1109885E-03	1.782826
11162011	19	0.048	0.024	0.006	0.001	0.001	0.001	0.000	0.000	0.022	0.003	0.011	290.309	0.930	0.3750286	6.422983	0.1956997E-04	2.516146
11162011	20	0.075	0.028	0.007	0.001	0.001	0.001	0.001	0.000	0.025	0.007	0.011	289.447	0.931	0.6098675	8.464912	0.1279079E-04	2.820725
11162011	21	0.076	0.025	0.007	0.002	0.001	0.001	0.001	0.001	0.027	0.010	0.010	288.763	0.926	0.6748406	8.910932	0.1086122E-04	2.914045
11162011	22	0.067	0.021	0.008	0.002	0.001	0.001	0.001	0.001	0.025	0.012	0.009	288.146	0.933	0.6838393	9.282780	0.1209927E-04	2.884919
11162011	23	0.051	0.015	0.008	0.001	0.001	0.001	0.001	0.001	0.024	0.012	0.008	287.442	0.941	0.7054387	10.32796	0.1441741E-04	2.855127
11162011	24	0.037	0.010	0.007	0.001	0.001	0.001	0.001	0.001	0.022	0.011	0.007	286.655	0.950	0.7237464	11.36061	0.1694602E-04	2.826334
11172011	01	0.025	0.009	0.006	0.001	0.001	0.000	0.002	0.001	0.020	0.009	0.007	285.832	0.953	0.6393319	9.556217	0.1918441E-04	2.697338
11172011	02	0.019	0.009	0.009	0.001	0.001	0.000	0.002	0.001	0.014	0.006	0.007	285.402	0.909	0.2882735	3.409850	0.1570365E-04	2.336735
11172011	03	0.016	0.009	0.010	0.001	0.001	0.000	0.001	0.000	0.009	0.002	0.005	284.720	0.904	0.1758963	2.165773	0.1656217E-04	2.116496
11172011	04	0.015	0.008	0.010	0.001	0.001	0.000	0.001	0.000	0.010	0.003	0.005	284.024	0.907	0.2326392	2.681668	0.1688328E-04	2.200948
11172011	05	0.014	0.009	0.009	0.002	0.002	0.000	0.001	0.002	0.022	0.006	0.011	283.317	0.907	0.4109172	5.131648	0.2900223E-04	2.247825
11172011	06	0.015	0.010	0.010	0.006	0.002	0.001	0.002	0.004	0.039	0.014	0.019	282.759	0.889	0.5470191	7.911642	0.4215886E-04	2.273378
11172011	07	0.016	0.012	0.011	0.009	0.003	0.001	0.004	0.007	0.045	0.024	0.022	282.115	0.880	0.6230357	9.333652	0.4057082E-04	2.361838
11172011	08	0.017	0.013	0.013	0.010	0.003	0.002	0.005	0.008	0.049	0.031	0.022	281.675	0.850	0.6540200	8.264397	0.2793552E-04	2.471054
11172011	09	0.019	0.015	0.018	0.006	0.003	0.001	0.005	0.009	0.047	0.032	0.020	282.337	0.800	0.5752016	5.068746	0.1504607E-04	2.527478
11172011	10	0.024	0.018	0.025	0.005	0.003	0.001	0.005	0.009	0.040	0.033	0.016	283.182	0.741	0.4815603	3.042869	0.6021401E-05	2.703586
11172011	11	0.032	0.019	0.033	0.003	0.003	0.001	0.005	0.009	0.026	0.026	0.013	284.039	0.683	0.3207397	1.405891	0.1971046E-05	2.853255
11172011	12	0.039	0.019	0.045	0.002	0.002	0.001	0.004	0.009	0.010	0.010	0.010	285.232	0.551	0.1746053E-01	0.5743200E-01	0.5035703E-07	3.057094
11172011	13	0.038	0.015	0.046	0.001	0.002	0.001	0.003	0.007	0.002	0.002	0.008	286.231	0.458	0.8597314E-02	0.2198012E-01	0.1980268E-07	3.045306
11172011	14	0.033	0.015	0.040	0.001	0.002	0.001	0.002	0.005	0.001	0.002	0.007	285.993	0.426	0.3000778E-01	0.1194874	0.6680358E-06	2.252522
11172011	15	0.037	0.016	0.039	0.001	0.002	0.001	0.002	0.005	0.001	0.002	0.006	285.171	0.419	0.1257831E-01	0.1802255E-01	0.1490649E-07	3.082441
11172011	16	0.039	0.016	0.033	0.001	0.001	0.001	0.002	0.005	0.001	0.001	0.006	284.208	0.415	0.1728326E-01	0.1905381E-01	0.1450868E-07	3.118354
11172011	17	0.038	0.016	0.025	0.001	0.001	0.001	0.002	0.005	0.001	0.001	0.006	282.837	0.413	0.2713352E-01	0.1934843E-01	0.1299130E-07	3.172993
11172011	18	0.039	0.017	0.018	0.001	0.001	0.001	0.002	0.006	0.002	0.002	0.006	281.569	0.407	0.3576279E-06	0.1127041E-06	0.1000138E-13	4.051880
11172011	19	0.047	0.019	0.013	0.001	0.002	0.001	0.003	0.007	0.001	0.003	0.006	280.809	0.396	0.1641083	0.6302392E-01	0.2995397E-08	4.323051
11172011	20	0.049	0.021	0.001	0.003	0.002	0.001	0.003	0.009	0.005	0.014	0.006	280.032	0.398	NaN	0.6973871	0.7056067E-07	3.994911
11172011	21	0.049	0.021	0.008	0.001	0.002	0.001	0.003	0.009	0.003	0.007	0.006	279.356	0.417	NaN	0.6259586	0.5046057E-07	4.093594
11172011	22	0.042	0.021	0.010	0.001	0.001	0.001	0.003	0.008	0.003	0.003	0.007	278.645	0.445	0.5960464E-06	0.1271794E-06	0.3756324E-17	7.529654
11172011	23	0.035	0.022	0.012	0.001	0.001	0.001	0.003	0.006	0.002	0.002	0.007	277.889	0.478	0.7140619E-01	0.3774638E-01	0.3072200E-07	3.089426
11172011	24	0.028	0.024	0.011	0.001	0.001	0.001	0.002	0.006	0.003	0.002	0.007	277.074	0.516	0.8574480E-01	0.5193799E-01	0.4324283E-07	3.079571
11182011	01	0.021	0.023	0.010	0.001	0.001	0.001	0.002	0.005	0.005	0.004	0.007	276.254	0.559	0.2913072	0.2829913	0.3483634E-06	2.909741
11182011	02	0.016	0.022	0.010	0.001	0.001	0.000	0.002	0.005	0.007	0.005	0.007	275.561	0.597	0.2916170	0.3072228	0.5853902E-06	2.720008
11182011	03	0.014	0.019	0.010	0.001	0.001	0.000	0.002	0.005	0.007	0.006	0.007	275.099	0.625	0.3239899	0.3834465	0.7314377E-06	2.719527
11182011	04	0.014	0.015	0.009	0.001	0.001	0.000	0.002	0.005	0.007	0.007	0.007	274.712	0.650	0.3702792	0.4530988	0.8028462E-06	2.751560
11182011	05	0.015	0.013	0.009	0.001	0.001	0.001	0.002	0.005	0.009	0.009	0.007	274.338	0.677	0.5195189	0.7346838	0.8554765E-06	2.933892
11182011	06	0.016	0.013	0.008	0.001	0.001	0.001	0.002	0.006	0.014	0.013	0.006	273.960	0.704	0.6058887	0.7377647	0.5149186E-06	3.156179
11182011	07	0.017	0.013	0.007	0.001	0.001	0.001	0.003	0.007	0.023	0.022	0.007	273.590	0.732	0.7674823	1.507133	0.1176184E-05	3.107676
11182011	08	0.019	0.014	0.006	0.001	0.001	0.001	0.003	0.008	0.031	0.032	0.007	273.874	0.714	0.8115562	1.872659	0.1252520E-05	3.174674
11182011	09	0.019	0.014	0.008	0.001	0.001	0.001	0.003	0.010	0.035	0.036	0.008	275.781	0.633	0.7183714	1.298504	0.5868263E-06	3.344934
11182011	10	0.020	0.014	0.016	0.001	0.001	0.001	0.003	0.009	0.031	0.031	0.008	278.447	0.532	0.4690624	0.5637776	0.1408271E-06	3.602422
11182011	11	0.024	0.014	0.022	0.001	0.001	0.001	0.003	0.009	0.025	0.025	0.008	281.021	0.446	0.1022900	0.8011122E-01	0.9406477E-08	3.930266
11182011	12	0.030	0.014	0.029	0.000	0.001	0.001	0.003	0.009	0.017	0.017	0.008	283.280	0.377	NaN	0.4870130	0.1624567E-05	2.476803
11182011	13	0.027	0.013	0.027	0.000	0.001	0.001	0.003	0.007	0.016	0.016	0.008	284.962	0.328	NaN	0.3217067	0.1107809E-04	1.462995
11182011	14	0.023	0.012	0.020	0.000	0.001	0.001	0.003	0.007	0.021	0.021	0.008	285.537	0.312	NaN	0.2642500	0.8433600E-08	4.496002
11182011	15	0.038	0.011	0.026	0.000	0.001	0.001	0.003	0.007	0.011	0.011	0.008	285.135	0.318	NaN	0.2576243	0.4252139E-08	4.782380
11182011	16	0.051	0.010	0.029	0.000	0.001	0.001	0.003	0.006	0.004	0.004	0.008	284.343	0.333	NaN	0.2882534	0.1590244E-07	4.258310
11182011	17	0.057	0.009	0.022	0.000	0.001	0.001	0.003	0.007	0.005	0.005	0.009	283.063	0.356	NaN	0.2975432	0.4019866E-07	3.869339
11182011	18	0.066	0.010	0.015	0.000	0.001	0.001	0.003	0.008	0.006	0.006	0.009	281.769	0.382	NaN	0.2303860	0.1752874E-07	4.118706
11182011	19	0.087	0.013	0.003	0.002	0.001	0.002	0.004	0.013	0.004	0.015	0.009	280.943	0.410	NaN	0.8799180	0.4510212E-07	4.290245
11182011	20	0.091	0.013	0.000	0.002	0.002	0.002	0.005	0.015	0.005	0.023	0.010	280.444	0.427	NaN	1.078687	0.5203534E-07	4.316597
11182011	21	0.082	0.012	0.000	0.003	0.002	0.002	0.005	0.014	0.008	0.025	0.010	280.067	0.434	NaN	1.085767	0.8652849E-07	4.098577
11182011	22	0.069	0.012	0.007	0.001	0.002	0.002	0.005	0.013	0.011	0.017	0.010	279.758	0.438	NaN	0.9036021	0.7967674E-07	4.054646
11182011	23	0.059	0.012	0.012	0.001	0.002	0.002	0.004	0.012	0.008	0.008	0.010	279.468	0.441	0.2816958	0.1213157	0.7817213E-08	4.190865
11182011	24	0.050	0.013	0.014	0.001	0.002	0.001	0.004	0.010	0.005	0.005	0.011	279.186	0.445	0.8207780E-01	0.4012048E-01	0.1930429E-07	3.317712
11192011	01	0.043	0.015	0.014	0.002	0.002	0.001	0.004	0.009	0.005	0.005	0.011	278.919	0.448	0.1355698	0.7248347E-01	0.3977399E-07	3.260640
11192011	02	0.038	0.019	0.013	0.002	0.002	0.001	0.004	0.008	0.008	0.007	0.012	278.771	0.452	0.3210807	0.3393393	0.3699525E-06	2.962488
11192011	03	0.035	0.023	0.014	0.002	0.002	0.001	0.004	0.008	0.011	0.009	0.012	278.783	0.455	0.3307231	0.3732669	0.3842032E-06	2.987458
11192011	04	0.035	0.027	0.014	0.002	0.002	0.001	0.004	0.007	0.013	0.010	0.013	278.858	0.454	0.3427996	0.4799895	0.1167007E-05	2.614158
11192011	05	0.037	0.030	0.015	0.002	0.002	0.001	0.004	0.008	0.014	0.010	0.013	278.989	0.451	0.3488660	0.4328130	0.6413283E-06	2.829220
11192011	06	0.041	0.033	0.014	0.001	0.002	0.001	0.004	0.008	0.013	0.010	0.013	279.180	0.447	0.3529205	0.4257039	0.6244112E-06	2.833637
11192011	07	0.048	0.037	0.014	0.001	0.002	0.001	0.004	0.009	0.011	0.010	0.013	279.385	0.444	0.3480762	0.3538012	0.2919055E-06	3.083517
11192011	08	0.056	0.040	0.014	0.001	0.002	0.002	0.004	0.010	0.009	0.009	0.013	279.831	0.453	0.2808434	0.2284673	0.1761887E-06	3.112846
11192011	09	0.060	0.043	0.017	0.002	0.002	0.002	0.005	0.011	0.007	0.007	0.013	281.500	0.455	0.8937609E-01	0.6900937E-01	0.3474318E-07	3.298038
11192011	10	0.040	0.037	0.019	0.002	0.002	0.001	0.004	0.009	0.007	0.007	0.013	283.781	0.461	0.1244868	0.2925865	0.5322348E-06	2.740151
11192011	11	0.027	0.040	0.019	0.002	0.002	0.001	0.004	0.008	0.007	0.004	0.014	285.583	0.461	0.5343002E-01	0.3697352	0.4794233E-05	1.887172
11192011	12	0.025	0.041	0.020	0.001	0.002	0.001	0.004	0.008	0.007	0.003	0.014	286.938	0.466	0.3742182E-01	0.3736595	0.5802356E-05	1.808872
11192011	13	0.023	0.035	0.020	0.002	0.002	0.001	0.003	0.007	0.005	0.001	0.013	287.867	0.479	0.2440757E-01	0.4001592	0.1068968E-04	1.573268
11192011	14	0.018	0.030	0.017	0.002	0.002	0.001	0.003	0.006	0.005	0.001	0.012	288.166	0.494	0.1850140E-01	0.4079475	0.1403678E-04	1.463337
11192011	15	0.018	0.030	0.016	0.002	0.002	0.001	0.003	0.006	0.005	0.001	0.011	287.920	0.508	0.2428800E-01	0.3681884	0.6523634E-05	1.751580
11192011	16	0.021	0.031	0.014	0.002	0.002	0.001	0.003	0.006	0.005	0.001	0.012	287.386	0.523	0.2908480E-01	0.4479786	0.1095126E-04	1.611793
11192011	17	0.026	0.034	0.010	0.002	0.002	0.001	0.003	0.006	0.005	0.001	0.012	286.451	0.541	0.4831165E-01	0.4782923	0.7972521E-05	1.778098
11192011	18	0.031	0.038	0.008	0.002	0.002	0.001	0.004	0.008	0.002	0.001	0.012	285.478	0.562	0.1323130	0.3579666	0.5531176E-06	2.811025
11192011	19	0.033	0.025	0.009	0.002	0.002	0.002	0.004	0.011	0.001	0.001	0.013	285.093	0.581	0.4248410E-01	0.9283014E-01	0.5719064E-07	3.210364
11192011	20	0.031	0.018	0.009	0.003	0.003	0.002	0.005	0.013	0.001	0.001	0.014	285.501	0.577	0.1903868E-01	0.4631969E-01	0.2870542E-07	3.207802
11192011	21	0.029	0.015	0.008	0.004	0.002	0.002	0.005	0.012	0.001	0.002	0.014	285.745	0.569	0.3206027E-01	0.8496770E-01	0.5365044E-07	3.199681
11192011	22	0.026	0.014	0.007	0.003	0.002	0.002	0.005	0.011	0.002	0.002	0.015	285.751	0.573	0.1048224	0.3102069	0.5618318E-06	2.742045
11192011	23	0.023	0.012	0.006	0.003	0.002	0.002	0.005	0.011	0.003	0.003	0.016	284.968	0.593	0.1585915	0.5074955	0.7544973E-06	2.827775
11192011	24	0.022	0.010	0.006	0.003	0.002	0.002	0.005	0.011	0.003	0.003	0.016	284.576	0.604	0.1674557	0.5291422	0.8018474E-06	2.819481
11202011	01	0.019	0.009	0.006	0.003	0.002	0.002	0.005	0.012	0.003	0.003	0.016	284.352	0.612	0.1244441	0.3734260	0.7472440E-06	2.698742
11202011	02	0.017	0.008	0.006	0.003	0.002	0.002	0.005	0.012	0.003	0.003	0.017	284.108	0.640	0.1730297	0.6122996	0.1051010E-05	2.765357
11202011	03	0.016	0.007	0.006	0.003	0.002	0.002	0.005	0.012	0.003	0.003	0.017	283.756	0.689	0.1991915	0.7484119	0.1281182E-05	2.766530
11202011	04	0.015	0.007	0.006	0.003	0.002	0.002	0.005	0.013	0.004	0.004	0.017	283.589	0.734	0.1762629	0.6651431	0.1281777E-05	2.715103
11202011	05	0.016	0.007	0.006	0.003	0.002	0.002	0.005	0.013	0.004	0.004	0.017	283.260	0.794	0.2319438	0.9292566	0.1618720E-05	2.758964
11202011	06	0.018	0.007	0.006	0.002	0.002	0.002	0.006	0.013	0.004	0.004	0.017	283.109	0.850	0.3238297	1.405508	0.2163417E-05	2.812693
11202011	07	0.019	0.007	0.006	0.002	0.003	0.002	0.006	0.014	0.005	0.004	0.017	283.697	0.877	0.3105870	1.475317	0.1759377E-05	2.923527
11202011	08	0.018	0.006	0.006	0.003	0.003	0.002	0.006	0.014	0.007	0.006	0.017	284.102	0.900	0.3568698	2.205555	0.3132227E-05	2.847665
11202011	09	0.021	0.005	0.006	0.003	0.003	0.002	0.006	0.014	0.009	0.008	0.019	284.884	0.902	0.4715965	3.514283	0.5386929E-05	2.814496
11202011	10	0.025	0.005	0.007	0.003	0.003	0.002	0.006	0.015	0.009	0.008	0.020	286.259	0.887	0.4019728	2.988925	0.4372151E-05	2.834820
11202011	11	0.021	0.004	0.013	0.003	0.003	0.002	0.006	0.014	0.010	0.007	0.021	288.082	0.857	0.2616673	2.622170	0.5432787E-05	2.683638
11202011	12	0.015	0.012	0.021	0.002	0.003	0.002	0.005	0.011	0.014	0.005	0.022	290.618	0.793	0.6157857E-01	2.040503	0.2754228E-04	1.869737
11202011	13	0.013	0.031	0.033	0.002	0.003	0.002	0.004	0.009	0.013	0.004	0.020	292.045	0.761	0.2917409E-01	1.782978	0.4510552E-04	1.596916
11202011	14	0.015	0.025	0.042	0.002	0.003	0.002	0.004	0.009	0.010	0.004	0.018	292.027	0.760	0.3420919E-01	1.536562	0.2302829E-04	1.824288
11202011	15	0.018	0.017	0.041	0.001	0.003	0.002	0.004	0.010	0.008	0.004	0.017	291.114	0.795	0.6759238E-01	1.599169	0.9327801E-05	2.234115
11202011	16	0.031	0.013	0.032	0.002	0.003	0.002	0.005	0.013	0.005	0.006	0.018	290.751	0.818	0.1212907	1.521563	0.3449979E-05	2.644473
11202011	17	0.041	0.014	0.029	0.001	0.003	0.003	0.006	0.017	0.003	0.004	0.018	290.451	0.841	0.3951150E-01	0.3668752	0.4747959E-06	2.888011
11202011	18	0.062	0.018	0.015	0.003	0.004	0.004	0.008	0.024	0.004	0.013	0.019	289.265	0.873	0.2781675	1.577435	0.2835010E-05	2.745397
11202011	19	0.077	0.022	0.000	0.007	0.004	0.005	0.009	0.030	0.003	0.031	0.020	288.319	0.910	NaN	11.15042	0.7226147E-09	7.188385
11202011	20	0.078	0.024	0.000	0.008	0.004	0.006	0.010	0.033	0.003	0.038	0.021	287.825	0.925	NaN	16.64192	0.1064975E-08	7.193864
11202011	21	0.072	0.024	0.000	0.008	0.004	0.006	0.010	0.034	0.003	0.042	0.021	287.646	0.911	NaN	14.27115	0.8994963E-09	7.200459
11202011	22	0.052	0.022	0.000	0.009	0.004	0.005	0.010	0.031	0.006	0.041	0.021	287.227	0.940	NaN	21.03230	0.6756980E-05	3.493134
11202011	23	0.029	0.020	0.007	0.006	0.003	0.005	0.009	0.027	0.010	0.026	0.020	287.026	0.958	NaN	24.39337	0.5662278E-05	3.634281
11202011	24	0.020	0.018	0.011	0.003	0.003	0.004	0.008	0.025	0.009	0.011	0.019	286.791	0.969	0.6874782	16.63228	0.6900054E-04	2.382099
11212011	01	0.015	0.017	0.010	0.003	0.003	0.003	0.007	0.023	0.007	0.009	0.017	286.555	0.979	0.7245304	23.66614	0.1088631E-03	2.337246
11212011	02	0.015	0.017	0.011	0.003	0.003	0.003	0.007	0.021	0.005	0.006	0.016	286.328	0.985	0.8623332	53.46695	0.2007464E-03	2.425437
11212011	03	0.015	0.017	0.011	0.002	0.003	0.002	0.007	0.018	0.005	0.004	0.015	286.239	0.984	0.6089075	15.20532	0.7938812E-04	2.282240
11212011	04	0.017	0.021	0.011	0.002	0.003	0.002	0.006	0.017	0.005	0.004	0.014	286.170	0.984	0.7633990	19.37888	0.6181734E-04	2.496218
11212011	05	0.024	0.026	0.009	0.003	0.003	0.002	0.006	0.016	0.006	0.007	0.013	286.173	0.981	0.8413043	23.96496	0.5739637E-04	2.620692
11212011	06	0.042	0.031	0.007	0.003	0.003	0.002	0.007	0.017	0.008	0.009	0.014	286.434	0.981	0.9175653	26.29667	0.3207453E-04	2.913741
11212011	07	0.074	0.031	0.007	0.003	0.003	0.003	0.007	0.020	0.010	0.009	0.018	287.070	0.971	0.8815674	16.33555	0.1928049E-04	2.928016
11212011	08	0.107	0.030	0.006	0.003	0.004	0.004	0.008	0.024	0.010	0.009	0.023	287.657	0.955	0.8489605	10.88381	0.1130402E-04	2.983548
11212011	09	0.113	0.028	0.008	0.003	0.004	0.005	0.009	0.027	0.012	0.011	0.024	288.429	0.933	0.6663364	5.465565	0.8079824E-05	2.830233
11212011	10	0.108	0.028	0.011	0.003	0.004	0.005	0.010	0.029	0.015	0.015	0.024	289.705	0.912	0.4880612	3.861747	0.7622256E-05	2.704700
11212011	11	0.082	0.024	0.013	0.003	0.004	0.004	0.010	0.030	0.009	0.016	0.023	292.560	0.862	0.2035007	1.112557	0.1439608E-05	2.888078
11212011	12	0.030	0.024	0.033	0.002	0.003	0.002	0.005	0.014	0.006	0.005	0.018	294.518	0.792	0.4692525E-01	0.8206138	0.1996449E-05	2.613881
11212011	13	0.014	0.047	0.043	0.001	0.002	0.001	0.002	0.007	0.010	0.002	0.014	295.888	0.736	0.7058561E-02	1.021413	0.4440310E-04	1.361788
11212011	14	0.011	0.039	0.044	0.001	0.001	0.001	0.002	0.006	0.014	0.001	0.015	295.233	0.731	0.6151378E-02	1.218723	0.9852507E-04	1.092358
11212011	15	0.022	0.033	0.035	0.001	0.001	0.001	0.002	0.008	0.012	0.001	0.016	294.769	0.753	0.1347381E-01	1.192636	0.3928192E-04	1.482315
11212011	16	0.020	0.024	0.026	0.001	0.001	0.001	0.002	0.008	0.017	0.001	0.019	294.229	0.759	0.1746064E-01	1.664532	0.7282760E-04	1.358996
11212011	17	0.040	0.029	0.024	0.001	0.001	0.002	0.003	0.011	0.012	0.002	0.020	293.083	0.790	0.5852872E-01	1.695710	0.1396497E-04	2.084311
11212011	18	0.087	0.043	0.021	0.001	0.002	0.003	0.005	0.022	0.002	0.002	0.020	291.287	0.834	0.1511574E-03	0.4384773E-03	0.1265898E-08	2.539548
11212011	19	0.105	0.058	0.006	0.005	0.002	0.004	0.007	0.028	0.002	0.020	0.019	289.865	0.882	NaN	7.121707	0.4845785E-09	7.167220
11212011	20	0.103	0.063	0.000	0.007	0.002	0.004	0.008	0.032	0.002	0.032	0.018	287.825	0.925	NaN	13.32625	0.8527933E-09	7.193864
11212011	21	0.089	0.059	0.000	0.009	0.002	0.004	0.008	0.033	0.005	0.044	0.019	287.646	0.911	NaN	14.92302	0.3908788E-05	3.581815
11212011	22	0.058	0.052	0.000	0.009	0.002	0.004	0.008	0.029	0.016	0.047	0.018	287.227	0.940	NaN	23.69678	0.1616457E-04	3.166125
11212011	23	0.041	0.043	0.000	0.008	0.002	0.003	0.007	0.024	0.013	0.037	0.016	287.026	0.958	NaN	29.02174	0.2398552E-04	3.082774
11212011	24	0.038	0.031	0.000	0.006	0.003	0.003	0.007	0.022	0.004	0.027	0.015	286.791	0.969	NaN	27.35464	0.5591675E-05	3.689489
11222011	01	0.035	0.024	0.000	0.005	0.003	0.002	0.006	0.019	0.002	0.023	0.013	286.555	0.979	NaN	35.92374	0.6960491E-05	3.712742
11222011	02	0.033	0.020	0.000	0.004	0.003	0.002	0.006	0.017	0.002	0.021	0.012	286.328	0.985	NaN	75.78113	0.5278244E-05	4.157072
11222011	03	0.033	0.018	0.000	0.003	0.003	0.002	0.006	0.015	0.002	0.019	0.011	286.239	0.984	NaN	27.85500	0.2220893E-05	4.098376
11222011	04	0.036	0.020	0.000	0.003	0.003	0.002	0.006	0.014	0.002	0.018	0.011	286.170	0.984	NaN	27.07190	0.4173003E-05	3.812070
11222011	05	0.044	0.026	0.000	0.003	0.003	0.002	0.006	0.015	0.002	0.019	0.010	286.173	0.981	NaN	27.37269	0.1681385E-08	7.211650
11222011	06	0.064	0.032	0.001	0.003	0.003	0.002	0.007	0.016	0.003	0.019	0.011	286.434	0.981	NaN	28.63851	0.1778947E-08	7.206787
11222011	07	0.088	0.030	0.008	0.002	0.003	0.003	0.008	0.020	0.011	0.011	0.018	287.070	0.971	0.9103423	18.62955	0.1856403E-04	3.001530
11222011	08	0.118	0.029	0.008	0.002	0.004	0.004	0.009	0.024	0.011	0.010	0.023	287.657	0.955	0.8771932	12.48982	0.1187466E-04	3.021935
11222011	09	0.119	0.028	0.009	0.003	0.004	0.005	0.010	0.027	0.013	0.012	0.025	288.429	0.933	0.7082323	6.362703	0.9033693E-05	2.847776
11222011	10	0.113	0.028	0.012	0.003	0.004	0.005	0.010	0.029	0.018	0.017	0.025	289.705	0.912	0.5569649	4.889706	0.9287926E-05	2.721364
11222011	11	0.085	0.025	0.018	0.002	0.004	0.004	0.011	0.030	0.012	0.015	0.024	292.560	0.862	0.2033386	1.222186	0.1790169E-05	2.834243
11222011	12	0.033	0.025	0.032	0.002	0.004	0.002	0.006	0.016	0.010	0.007	0.022	294.518	0.792	0.7884514E-01	1.326757	0.2733811E-05	2.686023
11222011	13	0.018	0.047	0.040	0.002	0.002	0.001	0.003	0.007	0.011	0.003	0.016	295.888	0.736	0.9369373E-02	1.282218	0.5448322E-04	1.371699
11222011	14	0.016	0.038	0.040	0.001	0.002	0.001	0.002	0.006	0.014	0.002	0.015	295.233	0.731	0.9998441E-02	1.251557	0.6186772E-04	1.305986
11222011	15	0.026	0.033	0.031	0.001	0.002	0.001	0.002	0.008	0.011	0.002	0.017	294.769	0.753	0.1708710E-01	1.354567	0.4184266E-04	1.510181
11222011	16	0.025	0.023	0.024	0.001	0.002	0.001	0.002	0.008	0.016	0.002	0.019	294.229	0.759	0.2310938E-01	1.694800	0.5556747E-04	1.484298
11222011	17	0.044	0.029	0.022	0.001	0.002	0.002	0.003	0.011	0.012	0.002	0.021	293.083	0.790	0.7010186E-01	1.890716	0.1537862E-04	2.089709
11222011	18	0.091	0.042	0.019	0.001	0.002	0.004	0.005	0.022	0.002	0.002	0.021	291.287	0.834	0.1510382E-03	0.4009661E-03	0.1107319E-08	2.558835
11222011	19	0.110	0.057	0.012	0.003	0.003	0.004	0.007	0.029	0.003	0.010	0.020	289.865	0.882	0.3494630	1.725462	0.2376533E-05	2.860961
11222011	20	0.014	0.017	0.008	0.021	0.002	0.002	0.004	0.012	0.036	0.005	0.020	290.273	0.929	0.4182084	8.433645	0.1717305E-04	2.691168
11222011	21	0.005	0.006	0.006	0.005	0.001	0.001	0.001	0.003	0.033	0.001	0.019	290.091	0.957	0.2361882	14.54556	0.1542759E-03	1.974433
11222011	22	0.009	0.009	0.006	0.004	0.001	0.001	0.001	0.002	0.035	0.002	0.019	289.640	0.975	0.5780225	38.44905	0.2026187E-03	2.278206
11222011	23	0.012	0.010	0.007	0.002	0.002	0.001	0.001	0.002	0.027	0.003	0.016	289.155	0.977	0.6224642	34.41877	0.1439970E-03	2.378442
11222011	24	0.013	0.008	0.007	0.002	0.002	0.001	0.001	0.002	0.016	0.002	0.011	288.837	0.976	0.5960488	24.41707	0.8459360E-04	2.460356
11232011	01	0.014	0.006	0.006	0.001	0.002	0.001	0.001	0.002	0.012	0.002	0.009	288.621	0.975	0.6116326	19.50275	0.5222737E-04	2.572198
11232011	02	0.012	0.005	0.005	0.001	0.002	0.001	0.001	0.002	0.012	0.001	0.009	288.345	0.973	0.4233253	10.27295	0.3492640E-04	2.468541
11232011	03	0.011	0.006	0.005	0.001	0.002	0.001	0.001	0.001	0.015	0.001	0.010	287.968	0.970	0.4303892	12.55535	0.5380850E-04	2.367978
11232011	04	0.010	0.006	0.006	0.002	0.002	0.001	0.001	0.002	0.020	0.002	0.012	287.515	0.967	0.5056568	15.59817	0.6417166E-04	2.385730
11232011	05	0.011	0.007	0.006	0.002	0.003	0.001	0.001	0.002	0.024	0.004	0.014	287.012	0.966	0.5939896	19.89416	0.7768351E-04	2.408397
11232011	06	0.016	0.007	0.005	0.003	0.003	0.001	0.002	0.003	0.026	0.005	0.015	286.520	0.964	0.6501369	15.59122	0.4225589E-04	2.566993
11232011	07	0.022	0.008	0.005	0.004	0.003	0.001	0.002	0.003	0.028	0.006	0.017	286.825	0.909	0.4032260	6.607575	0.3206726E-04	2.313980
11232011	08	0.021	0.010	0.008	0.004	0.003	0.002	0.002	0.003	0.039	0.006	0.023	286.248	0.912	0.4923756	9.539366	0.5034669E-04	2.277549
11232011	09	0.008	0.018	0.017	0.005	0.003	0.001	0.002	0.004	0.073	0.008	0.042	286.661	0.893	0.2331278	12.56559	0.3990240E-03	1.498184
11232011	10	0.000	0.020	0.033	0.004	0.002	0.001	0.004	0.008	0.093	0.006	0.082	287.324	0.836	0.8559763E-02	15.12197	0.1862953E-01	-0.9059356E-01
11232011	11	0.000	0.012	0.031	0.005	0.003	0.002	0.005	0.009	0.099	0.007	0.095	287.472	0.793	0.4021227E-02	13.75663	0.2486791E-01	-0.2571274
11232011	12	0.000	0.011	0.029	0.006	0.003	0.002	0.005	0.009	0.093	0.006	0.090	286.972	0.766	0.3071427E-02	11.81361	0.2812086E-01	-0.3766458
11232011	13	0.000	0.010	0.025	0.005	0.003	0.002	0.004	0.009	0.087	0.004	0.077	286.322	0.748	0.3636181E-02	8.883318	0.2543021E-01	-0.4567747
11232011	14	0.002	0.010	0.024	0.002	0.002	0.001	0.004	0.009	0.072	0.001	0.051	287.474	0.655	0.000000	4.279358	0.3297805E-02	0.1131537
11232011	15	0.011	0.009	0.020	0.001	0.002	0.001	0.002	0.006	0.042	0.002	0.028	286.570	0.649	0.8560759E-01	2.328899	0.1495180E-03	1.192457
11232011	16	0.017	0.010	0.016	0.001	0.001	0.001	0.002	0.005	0.033	0.002	0.023	285.817	0.661	0.1106975	1.984279	0.8358729E-04	1.375463
11232011	17	0.022	0.013	0.012	0.001	0.001	0.001	0.002	0.006	0.033	0.004	0.023	285.132	0.677	0.1750168	2.051202	0.5059637E-04	1.607889
11232011	18	0.031	0.016	0.009	0.001	0.002	0.001	0.003	0.007	0.032	0.005	0.024	284.502	0.692	0.2765347	2.185775	0.3012364E-04	1.860698
11232011	19	0.037	0.018	0.009	0.002	0.002	0.001	0.003	0.009	0.033	0.007	0.025	283.662	0.715	0.3980633	2.481223	0.1906852E-04	2.114349
11232011	20	0.040	0.018	0.008	0.002	0.002	0.001	0.004	0.010	0.032	0.009	0.025	283.081	0.739	0.4801641	2.670525	0.1352606E-04	2.295425
11232011	21	0.036	0.017	0.009	0.002	0.002	0.001	0.004	0.010	0.034	0.010	0.025	282.624	0.757	0.5211470	3.042150	0.1389221E-04	2.340409
11232011	22	0.031	0.016	0.009	0.002	0.002	0.001	0.004	0.009	0.036	0.011	0.025	282.181	0.773	0.5339320	3.395404	0.1719792E-04	2.295416
11232011	23	0.025	0.015	0.009	0.003	0.002	0.001	0.003	0.009	0.038	0.012	0.025	281.662	0.793	0.5440127	3.850212	0.2091900E-04	2.264944
11232011	24	0.020	0.013	0.009	0.003	0.002	0.001	0.003	0.008	0.040	0.012	0.025	281.166	0.813	0.5563042	4.479900	0.2735149E-04	2.214287
11242011	01	0.016	0.012	0.009	0.003	0.002	0.001	0.003	0.007	0.043	0.013	0.025	280.663	0.833	0.5783923	5.358246	0.3514542E-04	2.183154
11242011	02	0.013	0.012	0.009	0.003	0.002	0.001	0.003	0.006	0.045	0.014	0.025	280.109	0.851	0.5932221	6.463410	0.4726430E-04	2.135928
11242011	03	0.010	0.013	0.009	0.003	0.002	0.001	0.003	0.006	0.048	0.015	0.025	279.529	0.860	0.6255185	7.186360	0.5082147E-04	2.150462
11242011	04	0.008	0.013	0.011	0.003	0.002	0.001	0.003	0.005	0.048	0.017	0.024	278.904	0.868	0.5973396	8.037827	0.7232065E-04	2.045876
11242011	05	0.006	0.012	0.011	0.002	0.002	0.001	0.003	0.005	0.048	0.018	0.023	278.126	0.884	0.6266558	8.663951	0.7622795E-04	2.055602
11242011	06	0.006	0.012	0.009	0.003	0.002	0.001	0.003	0.005	0.048	0.020	0.021	277.429	0.895	0.7296044	10.88299	0.6594689E-04	2.217554
11242011	07	0.007	0.010	0.006	0.003	0.002	0.001	0.003	0.006	0.047	0.023	0.020	276.777	0.901	0.8005410	10.83715	0.4513906E-04	2.380363
11242011	08	0.015	0.010	0.004	0.003	0.002	0.001	0.003	0.007	0.044	0.026	0.018	276.987	0.854	0.8261670	6.497738	0.1451856E-04	2.650838
11242011	09	0.029	0.011	0.006	0.003	0.002	0.001	0.003	0.009	0.037	0.028	0.016	279.094	0.746	0.7194922	2.972824	0.4034640E-05	2.867364
11242011	10	0.031	0.008	0.013	0.001	0.001	0.001	0.003	0.007	0.019	0.015	0.012	282.449	0.609	0.2363598	0.7142627	0.1953085E-05	2.563137
11242011	11	0.038	0.007	0.021	0.001	0.001	0.001	0.002	0.007	0.005	0.004	0.009	285.902	0.490	0.4676872E-01	0.1520160	0.3048750E-06	2.697767
11242011	12	0.037	0.009	0.027	0.000	0.001	0.001	0.002	0.006	0.001	0.002	0.008	288.742	0.403	NaN	0.4509112	0.1193320E-05	2.577334
11242011	13	0.035	0.012	0.034	0.000	0.001	0.001	0.002	0.005	0.001	0.002	0.007	290.682	0.350	NaN	0.3935554	0.6753875E-04	0.7654529
11242011	14	0.035	0.017	0.036	0.000	0.001	0.001	0.002	0.005	0.001	0.001	0.007	291.389	0.336	NaN	0.3702903	0.9019328E-03	-0.3866318
11242011	15	0.039	0.019	0.040	0.000	0.001	0.001	0.002	0.005	0.001	0.002	0.007	290.549	0.360	NaN	0.4563073	0.1842711E-02	-0.6061998
11242011	16	0.044	0.019	0.040	0.000	0.001	0.001	0.002	0.006	0.001	0.002	0.007	289.180	0.399	NaN	0.5194002	0.2294863E-05	2.354745
11242011	17	0.051	0.020	0.036	0.000	0.001	0.001	0.002	0.006	0.001	0.002	0.007	287.373	0.448	NaN	0.6451266	0.7612122E-06	2.928139
11242011	18	0.066	0.022	0.026	0.000	0.001	0.002	0.003	0.008	0.003	0.004	0.007	285.452	0.503	NaN	0.6736134	0.2797377E-06	3.381660
11242011	19	0.102	0.030	0.000	0.004	0.002	0.003	0.005	0.016	0.010	0.034	0.008	283.625	0.569	NaN	2.420692	0.3467273E-06	3.843951
11242011	20	0.124	0.033	0.000	0.005	0.002	0.004	0.006	0.021	0.011	0.046	0.009	282.189	0.630	NaN	3.907759	0.4129481E-06	3.976032
11242011	21	0.120	0.033	0.000	0.005	0.002	0.004	0.007	0.023	0.016	0.056	0.009	281.099	0.674	NaN	4.977852	0.5986522E-06	3.919868
11242011	22	0.112	0.031	0.000	0.005	0.002	0.004	0.008	0.024	0.020	0.062	0.009	280.198	0.711	NaN	6.020368	0.7836719E-06	3.885489
11242011	23	0.102	0.029	0.000	0.005	0.002	0.004	0.008	0.023	0.023	0.064	0.009	279.482	0.742	NaN	6.742062	0.1080690E-05	3.795092
11242011	24	0.084	0.027	0.000	0.005	0.002	0.004	0.007	0.022	0.021	0.059	0.009	278.896	0.768	NaN	7.144217	0.1354564E-05	3.722155
11252011	01	0.066	0.026	0.000	0.005	0.002	0.003	0.007	0.020	0.019	0.052	0.009	278.293	0.790	NaN	6.817112	0.1675805E-05	3.609377
11252011	02	0.051	0.025	0.000	0.004	0.002	0.003	0.006	0.018	0.017	0.046	0.009	277.808	0.807	NaN	6.570138	0.2105857E-05	3.494146
11252011	03	0.038	0.026	0.000	0.004	0.002	0.003	0.006	0.016	0.017	0.041	0.009	277.196	0.832	NaN	6.607272	0.2770105E-05	3.377526
11252011	04	0.029	0.027	0.000	0.004	0.001	0.002	0.005	0.014	0.019	0.036	0.009	276.694	0.848	NaN	6.583618	0.4714760E-05	3.145005
11252011	05	0.024	0.030	0.000	0.004	0.001	0.002	0.005	0.013	0.019	0.034	0.009	276.252	0.860	NaN	6.732185	0.5882388E-05	3.058602
11252011	06	0.023	0.034	0.000	0.004	0.002	0.002	0.005	0.014	0.019	0.035	0.009	275.952	0.862	NaN	6.892755	0.4870044E-05	3.150860
11252011	07	0.023	0.040	0.000	0.004	0.002	0.002	0.005	0.014	0.021	0.037	0.010	275.612	0.868	NaN	7.787268	0.6722764E-05	3.063837
11252011	08	0.028	0.049	0.000	0.004	0.002	0.002	0.006	0.016	0.024	0.042	0.010	275.931	0.830	NaN	6.494580	0.3567821E-05	3.260148
11252011	09	0.032	0.051	0.000	0.005	0.002	0.003	0.007	0.019	0.030	0.055	0.011	278.216	0.719	NaN	5.099106	0.2645745E-05	3.284946
11252011	10	0.023	0.059	0.017	0.002	0.002	0.003	0.006	0.016	0.032	0.038	0.014	281.851	0.580	0.2770199	0.4954037	0.2214318E-06	3.349719
11252011	11	0.037	0.067	0.037	0.001	0.002	0.002	0.006	0.015	0.012	0.012	0.017	285.454	0.470	0.2315742E-01	0.5300564E-01	0.4341600E-07	3.086672
11252011	12	0.037	0.076	0.041	0.000	0.002	0.002	0.005	0.014	0.008	0.006	0.020	288.729	0.384	NaN	0.7694818	0.2459118E-02	-0.5045810
11252011	13	0.026	0.093	0.046	0.000	0.001	0.002	0.004	0.010	0.012	0.002	0.020	290.910	0.332	NaN	0.6135954	0.2091871E-01	-1.532653
11252011	14	0.023	0.085	0.051	0.000	0.001	0.002	0.004	0.009	0.017	0.002	0.021	291.777	0.318	NaN	0.6448810	0.2797029E-01	-1.637217
11252011	15	0.021	0.064	0.048	0.000	0.001	0.001	0.003	0.008	0.018	0.001	0.020	291.099	0.342	NaN	0.6440700	0.2798021E-01	-1.637918
11252011	16	0.023	0.051	0.046	0.000	0.001	0.001	0.003	0.008	0.018	0.001	0.020	289.806	0.383	NaN	0.7873057	0.2387227E-01	-1.481750
11252011	17	0.028	0.045	0.041	0.000	0.001	0.002	0.003	0.008	0.017	0.002	0.020	288.039	0.434	NaN	1.110939	0.1332107E-01	-1.078849
11252011	18	0.056	0.048	0.032	0.000	0.002	0.002	0.004	0.012	0.009	0.003	0.020	286.007	0.495	NaN	1.341742	0.4128110E-05	2.511918
11252011	19	0.086	0.056	0.030	0.000	0.002	0.003	0.007	0.020	0.007	0.007	0.021	284.210	0.566	NaN	1.173372	0.5293662E-06	3.345679
11252011	20	0.073	0.059	0.027	0.001	0.002	0.004	0.008	0.023	0.022	0.021	0.022	283.082	0.617	0.4507174	0.8441745	0.3223800E-06	3.418064
11252011	21	0.057	0.059	0.028	0.001	0.002	0.004	0.008	0.024	0.030	0.029	0.023	282.458	0.642	0.5236720	1.276467	0.6503521E-06	3.292861
11252011	22	0.047	0.058	0.031	0.001	0.002	0.004	0.008	0.024	0.026	0.026	0.023	282.221	0.649	0.4657145	1.188688	0.7671665E-06	3.190178
11252011	23	0.042	0.058	0.031	0.001	0.002	0.004	0.008	0.022	0.015	0.015	0.023	282.109	0.674	0.3371282	0.8376977	0.6745202E-06	3.094092
11252011	24	0.034	0.056	0.023	0.002	0.002	0.003	0.007	0.020	0.009	0.009	0.023	281.997	0.691	0.2549168	0.7067301	0.6630604E-06	3.027700
11262011	01	0.028	0.052	0.015	0.002	0.002	0.003	0.007	0.018	0.008	0.008	0.022	281.921	0.705	0.2739416	0.8043286	0.9815550E-06	2.913519
11262011	02	0.023	0.041	0.009	0.002	0.002	0.003	0.007	0.017	0.007	0.006	0.022	281.953	0.723	0.3081879	0.9209884	0.1306616E-05	2.848106
11262011	03	0.020	0.028	0.006	0.003	0.002	0.002	0.007	0.016	0.005	0.005	0.021	282.090	0.747	0.3078102	0.9876329	0.1383273E-05	2.853688
11262011	04	0.019	0.020	0.005	0.003	0.002	0.002	0.007	0.015	0.005	0.005	0.021	282.307	0.774	0.3639005	1.329171	0.1749375E-05	2.880698
11262011	05	0.019	0.018	0.005	0.003	0.003	0.002	0.007	0.015	0.005	0.005	0.021	282.540	0.805	0.4005693	1.639232	0.2386835E-05	2.836818
11262011	06	0.023	0.018	0.005	0.003	0.003	0.002	0.007	0.016	0.006	0.006	0.022	282.767	0.826	0.4583373	1.982642	0.2539440E-05	2.892506
11262011	07	0.030	0.019	0.006	0.003	0.003	0.003	0.008	0.017	0.007	0.007	0.022	282.982	0.837	0.4717972	1.991592	0.2116118E-05	2.973660
11262011	08	0.039	0.017	0.008	0.003	0.003	0.003	0.008	0.019	0.008	0.007	0.022	283.237	0.828	0.3955538	1.400611	0.1153369E-05	3.084349
11262011	09	0.048	0.017	0.012	0.003	0.004	0.003	0.009	0.021	0.005	0.005	0.022	284.898	0.819	0.1581204	0.5161069	0.4579085E-06	3.051961
11262011	10	0.037	0.014	0.015	0.003	0.004	0.003	0.009	0.021	0.004	0.004	0.022	288.162	0.743	0.3048152E-01	0.1569022	0.1253418E-06	3.097533
11262011	11	0.022	0.012	0.018	0.003	0.003	0.002	0.006	0.013	0.004	0.004	0.018	290.460	0.690	0.6956953E-01	0.6505077	0.1585431E-05	2.613105
11262011	12	0.016	0.011	0.021	0.003	0.002	0.001	0.003	0.008	0.003	0.003	0.012	291.815	0.659	0.2194309E-01	0.4866845	0.3111762E-05	2.194241
11262011	13	0.013	0.009	0.024	0.002	0.002	0.001	0.002	0.005	0.003	0.002	0.010	292.569	0.640	0.7122040E-02	0.5533432	0.2166451E-04	1.407246
11262011	14	0.012	0.007	0.025	0.002	0.002	0.001	0.002	0.004	0.004	0.001	0.009	292.824	0.623	0.6193399E-02	0.5216841	0.2236932E-04	1.367755
11262011	15	0.013	0.006	0.022	0.002	0.002	0.001	0.002	0.004	0.005	0.001	0.009	291.816	0.629	0.9528697E-02	0.5396448	0.1771041E-04	1.483879
11262011	16	0.017	0.006	0.018	0.002	0.002	0.001	0.002	0.005	0.006	0.001	0.011	291.270	0.652	0.1429695E-01	0.6734477	0.2255225E-04	1.475114
11262011	17	0.027	0.007	0.013	0.002	0.002	0.001	0.002	0.007	0.007	0.001	0.013	290.182	0.677	0.3417772E-01	0.7490221	0.1212693E-04	1.790744
11262011	18	0.048	0.010	0.010	0.002	0.002	0.002	0.004	0.012	0.002	0.002	0.016	288.760	0.718	0.1526768	0.6741496	0.7225888E-06	2.969865
11262011	19	0.059	0.012	0.013	0.002	0.003	0.003	0.006	0.018	0.001	0.001	0.018	287.814	0.749	0.000000	0.5263760E-08	0.1000354E-13	2.721142
11262011	20	0.054	0.013	0.013	0.002	0.003	0.003	0.007	0.021	0.001	0.001	0.018	287.413	0.762	0.000000	0.4844408E-08	0.2765127E-18	7.243526
11262011	21	0.043	0.012	0.009	0.003	0.003	0.003	0.006	0.019	0.001	0.003	0.015	287.261	0.773	0.2627903	0.3623158	0.1237238E-06	3.466634
11262011	22	0.031	0.009	0.000	0.007	0.003	0.003	0.007	0.019	0.001	0.013	0.013	287.220	0.790	NaN	3.045004	0.1755261E-09	7.239246
11262011	23	0.022	0.006	0.000	0.009	0.003	0.003	0.007	0.017	0.000	0.014	0.009	287.286	0.804	NaN	3.613943	0.2107496E-09	7.234215
11262011	24	0.017	0.005	0.000	0.011	0.003	0.003	0.006	0.014	0.000	0.014	0.007	287.412	0.813	NaN	4.123682	0.2431135E-09	7.229476
11272011	01	0.014	0.004	0.000	0.012	0.003	0.002	0.005	0.012	0.000	0.014	0.006	287.377	0.829	NaN	4.374683	0.6814321E-06	3.807524
11272011	02	0.011	0.004	0.000	0.013	0.003	0.002	0.005	0.011	0.000	0.014	0.005	287.277	0.850	NaN	4.855629	0.1396129E-05	3.541320
11272011	03	0.009	0.004	0.000	0.013	0.003	0.002	0.004	0.010	0.000	0.013	0.004	287.086	0.878	NaN	5.565229	0.2129954E-05	3.417113
11272011	04	0.007	0.004	0.000	0.013	0.003	0.001	0.004	0.009	0.000	0.012	0.004	286.971	0.898	NaN	5.477777	0.6275101E-05	2.940984
11272011	05	0.008	0.005	0.000	0.012	0.004	0.001	0.004	0.008	0.000	0.012	0.004	287.031	0.908	0.8333334	5.805191	0.4159592E-05	3.144766
11272011	06	0.009	0.005	0.001	0.014	0.004	0.001	0.003	0.008	0.000	0.011	0.004	288.547	0.836	0.8333334	3.343652	0.1872880E-05	3.251711
11272011	07	0.011	0.006	0.001	0.014	0.004	0.001	0.003	0.008	0.000	0.012	0.004	288.753	0.827	0.7692308	3.191477	0.1568575E-05	3.308486
11272011	08	0.014	0.007	0.000	0.013	0.004	0.001	0.003	0.008	0.000	0.012	0.004	289.063	0.812	0.8333334	2.913762	0.9891418E-06	3.469196
11272011	09	0.017	0.008	0.000	0.013	0.004	0.002	0.003	0.008	0.000	0.014	0.004	290.399	0.752	0.8571429	2.663266	0.6254575E-06	3.629217
11272011	10	0.017	0.008	0.001	0.013	0.004	0.002	0.003	0.008	0.002	0.016	0.003	293.035	0.637	0.8235294	2.111092	0.2219986E-06	3.978157
11272011	11	0.012	0.007	0.003	0.009	0.003	0.001	0.003	0.007	0.006	0.017	0.003	294.900	0.567	0.8214730	1.505465	0.8599192E-05	2.243213
11272011	12	0.005	0.007	0.005	0.007	0.003	0.001	0.002	0.004	0.009	0.013	0.003	295.489	0.529	0.9161794	1.051576	0.6241284E-04	1.226567
11272011	13	0.012	0.006	0.012	0.003	0.003	0.001	0.002	0.004	0.000	0.003	0.004	295.936	0.497	0.2000000	0.1181787	0.7559787E-08	4.194030
11272011	14	0.013	0.007	0.010	0.002	0.003	0.001	0.002	0.004	0.000	0.003	0.004	295.864	0.488	0.2307692	0.1141673	0.5219093E-08	4.339947
11272011	15	0.016	0.009	0.009	0.002	0.003	0.001	0.002	0.004	0.000	0.002	0.005	294.884	0.499	0.2727273	0.1385882	0.1042250E-07	4.123755
11272011	16	0.022	0.011	0.007	0.002	0.003	0.001	0.002	0.006	0.000	0.003	0.006	294.305	0.519	0.3000000	0.1265646	0.5616541E-08	4.352843
11272011	17	0.028	0.014	0.003	0.004	0.003	0.002	0.003	0.009	0.000	0.007	0.007	293.246	0.543	0.3000000	0.1362357	0.8763495E-08	4.191614
11272011	18	0.032	0.015	0.000	0.006	0.003	0.002	0.004	0.011	0.000	0.011	0.007	292.200	0.568	NaN	1.465828	0.8803289E-10	7.221438
11272011	19	0.031	0.014	0.000	0.006	0.003	0.002	0.004	0.012	0.000	0.011	0.006	291.923	0.584	NaN	1.465099	0.8822895E-10	7.220256
11272011	20	0.027	0.010	0.000	0.007	0.003	0.002	0.004	0.012	0.000	0.012	0.006	291.896	0.597	NaN	1.741350	0.1059101E-09	7.215949
11272011	21	0.023	0.007	0.000	0.008	0.004	0.002	0.004	0.011	0.000	0.012	0.005	291.732	0.627	NaN	1.970257	0.1219948E-09	7.208181
11272011	22	0.021	0.005	0.000	0.009	0.004	0.002	0.004	0.011	0.000	0.011	0.005	291.418	0.662	NaN	2.156441	0.1354642E-09	7.201913
11272011	23	0.018	0.004	0.000	0.009	0.004	0.002	0.004	0.009	0.000	0.010	0.005	290.921	0.716	NaN	2.409534	0.1542628E-09	7.193672
11272011	24	0.014	0.004	0.000	0.009	0.004	0.002	0.004	0.009	0.000	0.009	0.005	290.483	0.748	NaN	2.499735	0.1606696E-09	7.191960
11282011	01	0.012	0.004	0.000	0.009	0.004	0.001	0.003	0.008	0.000	0.009	0.005	289.891	0.794	0.8888890	2.386418	0.1914181E-06	4.095764
11282011	02	0.011	0.004	0.000	0.009	0.004	0.001	0.003	0.009	0.000	0.010	0.005	289.679	0.820	NaN	2.985380	0.3683628E-06	3.908724
11282011	03	0.011	0.004	0.000	0.008	0.004	0.001	0.003	0.009	0.000	0.010	0.005	289.683	0.842	NaN	3.266010	0.2432973E-06	4.127880
11282011	04	0.012	0.005	0.000	0.008	0.004	0.001	0.003	0.009	0.000	0.011	0.005	289.499	0.873	0.9147108	3.863242	0.4182977E-06	3.965466
11282011	05	0.015	0.005	0.000	0.009	0.004	0.001	0.003	0.009	0.000	0.011	0.005	289.259	0.906	0.9090909	5.363955	0.1620338E-05	3.519880
11282011	06	0.021	0.006	0.000	0.010	0.004	0.001	0.003	0.009	0.001	0.012	0.006	289.004	0.945	0.8055237	9.332360	0.8898855E-05	3.020657
11282011	07	0.030	0.008	0.001	0.009	0.004	0.002	0.003	0.009	0.002	0.012	0.006	289.098	0.965	0.9273803	18.24864	0.1109164E-04	3.216235
11282011	08	0.029	0.003	0.005	0.002	0.002	0.001	0.001	0.003	0.007	0.003	0.007	289.074	0.970	0.6095508	9.912267	0.1387509E-04	2.853937
11282011	09	0.015	0.001	0.003	0.000	0.000	0.000	0.000	0.000	0.007	0.000	0.004	288.408	0.973	0.2224929	5.172990	0.2356531E-04	2.341469
11282011	10	0.010	0.001	0.003	0.000	0.000	0.000	0.000	0.000	0.006	0.000	0.003	287.548	0.960	0.9971976E-01	2.685844	0.2132676E-04	2.100156
11282011	11	0.009	0.003	0.003	0.000	0.000	0.000	0.000	0.000	0.007	0.000	0.004	286.474	0.956	0.1291122	3.566187	0.3243826E-04	2.041147
11282011	12	0.012	0.008	0.003	0.000	0.000	0.000	0.000	0.000	0.007	0.001	0.004	285.439	0.941	0.1249556	2.382203	0.2231695E-04	2.028344
11282011	13	0.018	0.015	0.005	0.000	0.001	0.000	0.000	0.000	0.007	0.002	0.004	284.311	0.925	0.2439106	2.505204	0.1259258E-04	2.298728
11282011	14	0.017	0.019	0.006	0.001	0.001	0.001	0.000	0.001	0.010	0.003	0.005	283.266	0.907	0.3269881	2.318235	0.7847903E-05	2.470404
11282011	15	0.019	0.021	0.006	0.001	0.001	0.001	0.001	0.001	0.013	0.004	0.007	282.427	0.903	0.4311641	3.087986	0.1056829E-04	2.465671
11282011	16	0.022	0.024	0.005	0.002	0.002	0.001	0.001	0.001	0.016	0.007	0.007	281.642	0.912	0.6260423	4.562583	0.9564716E-05	2.678539
11282011	17	0.027	0.025	0.003	0.002	0.002	0.001	0.001	0.001	0.018	0.009	0.007	280.982	0.913	0.7252589	4.975721	0.7665274E-05	2.812328
11282011	18	0.031	0.024	0.003	0.003	0.002	0.002	0.001	0.001	0.019	0.010	0.007	280.318	0.896	0.7916822	5.099325	0.5664860E-05	2.954324
11282011	19	0.037	0.023	0.002	0.003	0.002	0.002	0.001	0.001	0.019	0.010	0.008	279.437	0.885	0.8265467	4.863290	0.4906608E-05	2.996149
11282011	20	0.041	0.024	0.002	0.003	0.002	0.002	0.002	0.001	0.019	0.011	0.008	278.800	0.880	0.8554460	4.692680	0.3897574E-05	3.080627
11282011	21	0.034	0.025	0.002	0.003	0.002	0.001	0.002	0.001	0.018	0.010	0.007	278.345	0.882	0.8231813	4.117811	0.4143873E-05	2.997260
11282011	22	0.023	0.028	0.003	0.002	0.002	0.001	0.001	0.001	0.017	0.009	0.007	277.996	0.880	0.7528527	3.727691	0.6196270E-05	2.779310
11282011	23	0.012	0.027	0.005	0.001	0.001	0.001	0.001	0.000	0.014	0.005	0.006	278.256	0.835	0.4466457	1.942624	0.9472520E-05	2.311923
11282011	24	0.003	0.027	0.007	0.000	0.001	0.000	0.000	0.000	0.012	0.001	0.006	278.029	0.828	0.1057121	1.303099	0.6239177E-04	1.319850
11292011	01	0.002	0.026	0.007	0.000	0.001	0.000	0.000	0.000	0.012	0.001	0.007	277.920	0.820	0.3692073E-01	1.337904	0.2411319E-03	0.7441702
11292011	02	0.002	0.030	0.006	0.000	0.001	0.000	0.000	0.000	0.011	0.001	0.006	277.719	0.821	0.5781817E-01	1.176656	0.1165025E-03	1.004314
11292011	03	0.002	0.035	0.006	0.000	0.001	0.000	0.000	0.000	0.010	0.001	0.006	277.495	0.827	0.3696197E-01	1.209513	0.1959045E-03	0.7905660
11292011	04	0.003	0.040	0.006	0.000	0.001	0.000	0.000	0.000	0.009	0.001	0.005	277.245	0.837	0.8875734E-01	1.139871	0.6109422E-04	1.270856
11292011	05	0.005	0.041	0.006	0.000	0.001	0.000	0.000	0.000	0.009	0.001	0.005	276.988	0.847	0.1600602	1.287600	0.3553075E-04	1.559177
11292011	06	0.008	0.040	0.005	0.001	0.001	0.000	0.000	0.000	0.010	0.003	0.005	276.756	0.853	0.2844744	1.481315	0.1920117E-04	1.887320
11292011	07	0.013	0.039	0.004	0.001	0.001	0.000	0.000	0.000	0.012	0.004	0.005	276.544	0.859	0.4928309	1.888021	0.1014575E-04	2.269723
11292011	08	0.016	0.040	0.003	0.001	0.001	0.001	0.000	0.001	0.013	0.006	0.005	276.431	0.865	0.6679223	2.217816	0.4518236E-05	2.690957
11292011	09	0.017	0.042	0.003	0.002	0.002	0.001	0.001	0.001	0.014	0.008	0.005	276.513	0.864	0.7197324	2.487940	0.3702803E-05	2.827309
11292011	10	0.016	0.043	0.004	0.002	0.002	0.001	0.001	0.001	0.015	0.008	0.005	276.722	0.858	0.7093011	2.576366	0.4056998E-05	2.802803
11292011	11	0.013	0.047	0.005	0.002	0.002	0.001	0.001	0.001	0.014	0.008	0.005	276.970	0.851	0.6245543	2.289770	0.4775517E-05	2.680772
11292011	12	0.013	0.046	0.005	0.001	0.002	0.001	0.001	0.002	0.012	0.008	0.005	277.177	0.851	0.6045502	1.940483	0.3465565E-05	2.748136
11292011	13	0.015	0.044	0.005	0.001	0.002	0.001	0.001	0.003	0.011	0.009	0.006	277.232	0.855	0.6350204	2.264987	0.4023605E-05	2.750450
11292011	14	0.014	0.044	0.005	0.002	0.002	0.001	0.001	0.004	0.012	0.011	0.006	277.162	0.868	0.6435920	2.549029	0.4591625E-05	2.744408
11292011	15	0.017	0.043	0.004	0.002	0.002	0.001	0.002	0.005	0.013	0.011	0.007	277.195	0.867	0.6911137	2.565726	0.3630787E-05	2.849210
11292011	16	0.021	0.042	0.004	0.002	0.002	0.001	0.002	0.006	0.011	0.010	0.007	277.204	0.866	0.6598366	2.079911	0.2709070E-05	2.885225
11292011	17	0.025	0.041	0.004	0.002	0.002	0.001	0.002	0.006	0.009	0.008	0.006	277.175	0.868	0.5962390	1.438455	0.2360203E-05	2.784947
11292011	18	0.027	0.038	0.005	0.002	0.002	0.001	0.002	0.007	0.008	0.007	0.006	277.267	0.860	0.6645437	1.522669	0.1790550E-05	2.929619
11292011	19	0.023	0.033	0.007	0.002	0.002	0.001	0.002	0.006	0.010	0.009	0.007	277.454	0.839	0.5919303	1.598880	0.2015537E-05	2.899425
11292011	20	0.018	0.026	0.009	0.001	0.003	0.001	0.002	0.006	0.010	0.010	0.006	277.618	0.811	0.5428873	1.219321	0.1674114E-05	2.862333
11292011	21	0.013	0.021	0.011	0.001	0.002	0.001	0.002	0.005	0.009	0.008	0.006	277.640	0.797	0.3358759	0.8084699	0.1376144E-05	2.769000
11292011	22	0.010	0.023	0.012	0.001	0.002	0.001	0.001	0.003	0.007	0.007	0.005	277.619	0.788	0.3218669	0.9618803	0.2729806E-05	2.546989
11292011	23	0.009	0.025	0.012	0.001	0.001	0.000	0.001	0.002	0.006	0.004	0.004	277.557	0.783	0.1887743	0.5917975	0.3282755E-05	2.255935
11292011	24	0.008	0.026	0.012	0.000	0.001	0.000	0.001	0.002	0.006	0.003	0.004	277.452	0.777	NaN	1.367881	0.2610915E-02	-0.2807445
