# Supplementary material for: Understanding nitrate formation in a world with less sulfate
Source: Copernicus journal article supplement (doi:10.5194/acp-18-12765-2018), 2018-09-05
Supplement: Supplementary file 2 [file acp-18-12765-2018-supplement.zip › DATA/RAW DATA FOR DIURNALS/data_extract_JST_sep_mod.csv]

Date	Hour	NH3	SO2	HNO3	CL	NA	MG	K	CA	NH4	NO3	SO4	T	RH	e_NO3	Water	H+	pH
09022011	01	0.149	0.075	0.080	0.000	0.001	0.002	0.007	0.025	0.017	0.006	0.036	297.248	0.697	NaN	6.178617	0.2098131E-04	2.469059
09022011	02	0.138	0.077	0.069	0.000	0.001	0.002	0.007	0.025	0.021	0.008	0.037	296.686	0.735	NaN	6.999866	0.2518597E-04	2.443931
09022011	03	0.127	0.079	0.059	0.000	0.001	0.002	0.007	0.026	0.023	0.009	0.038	296.281	0.757	NaN	7.055676	0.2513160E-04	2.448318
09022011	04	0.124	0.082	0.049	0.000	0.002	0.002	0.007	0.027	0.022	0.010	0.039	295.969	0.766	NaN	6.720828	0.2147296E-04	2.495531
09022011	05	0.137	0.085	0.038	0.001	0.002	0.003	0.008	0.029	0.017	0.011	0.040	295.654	0.778	0.1808820	2.610532	0.3464835E-05	2.877047
09022011	06	0.155	0.088	0.029	0.001	0.002	0.004	0.009	0.032	0.014	0.012	0.040	295.349	0.790	0.2304968	2.266106	0.1399912E-05	3.209180
09022011	07	0.171	0.091	0.026	0.001	0.002	0.005	0.010	0.036	0.011	0.010	0.041	295.186	0.806	0.1779180	1.490334	0.6953821E-06	3.331060
09022011	08	0.142	0.087	0.050	0.001	0.002	0.006	0.010	0.038	0.011	0.011	0.042	296.752	0.756	0.6366050E-01	0.7948976	0.4300645E-06	3.266778
09022011	09	0.091	0.068	0.103	0.000	0.001	0.004	0.007	0.026	0.028	0.012	0.041	299.290	0.653	NaN	6.303211	0.5951724E-02	0.2491910E-01
09022011	10	0.080	0.058	0.155	0.000	0.001	0.002	0.005	0.019	0.038	0.007	0.040	301.859	0.555	NaN	4.162073	0.7073461E-01	-1.230322
09022011	11	0.070	0.039	0.161	0.000	0.001	0.002	0.004	0.013	0.047	0.003	0.039	304.146	0.481	NaN	3.075607	0.8553261E-01	-1.444201
09022011	12	0.047	0.028	0.148	0.000	0.001	0.001	0.003	0.009	0.051	0.001	0.037	306.052	0.424	NaN	2.091698	0.9940816E-01	-1.676923
09022011	13	0.025	0.023	0.126	0.000	0.001	0.001	0.003	0.008	0.051	0.000	0.036	307.758	0.373	NaN	1.472736	0.9978255E-01	-1.830930
09022011	14	0.009	0.024	0.101	0.000	0.001	0.001	0.003	0.007	0.059	0.000	0.041	308.384	0.351	0.3342867E-02	1.858734	0.8470686E-02	-0.6587012
09022011	15	0.003	0.031	0.078	0.000	0.001	0.001	0.003	0.007	0.063	0.000	0.048	308.152	0.349	0.7957220E-04	1.386189	0.6607204E-02	-0.6781954
09022011	16	0.002	0.042	0.058	0.000	0.001	0.001	0.003	0.007	0.066	0.000	0.053	307.347	0.362	0.3433228E-04	1.427056	0.4896966E-02	-0.5354861
09022011	17	0.002	0.061	0.049	0.000	0.001	0.001	0.003	0.007	0.074	0.000	0.056	306.104	0.385	0.7206202E-04	1.803075	0.7391803E-02	-0.6127366
09022011	18	0.006	0.083	0.046	0.000	0.001	0.001	0.003	0.009	0.085	0.000	0.059	304.799	0.409	0.1671374E-02	2.376129	0.7682455E-02	-0.5096300
09022011	19	0.036	0.112	0.047	0.000	0.001	0.002	0.005	0.017	0.084	0.001	0.064	303.130	0.438	NaN	3.096007	0.7864544E-02	-0.4048717
09022011	20	0.068	0.137	0.059	0.000	0.002	0.003	0.007	0.024	0.075	0.001	0.067	301.621	0.472	NaN	3.683335	0.3758017E-03	0.9912825
09022011	21	0.077	0.145	0.069	0.000	0.002	0.003	0.007	0.025	0.070	0.001	0.067	300.518	0.508	NaN	4.421309	0.4746754E-03	0.9691542
09022011	22	0.078	0.141	0.070	0.000	0.002	0.003	0.008	0.026	0.065	0.002	0.065	299.654	0.542	NaN	4.752707	0.3723380E-03	1.106004
09022011	23	0.073	0.135	0.061	0.000	0.002	0.003	0.008	0.025	0.063	0.002	0.062	298.930	0.579	NaN	5.063694	0.2267025E-03	1.349011
09022011	24	0.070	0.125	0.050	0.000	0.002	0.003	0.007	0.022	0.063	0.003	0.059	298.285	0.619	NaN	5.494623	0.1943331E-03	1.451391
09032011	01	0.065	0.109	0.043	0.000	0.002	0.003	0.007	0.020	0.063	0.003	0.057	297.785	0.644	NaN	5.606730	0.1853311E-03	1.480761
09032011	02	0.061	0.091	0.037	0.001	0.002	0.003	0.008	0.019	0.061	0.003	0.055	297.070	0.696	0.6640440E-01	4.449190	0.9143494E-04	1.687169
09032011	03	0.061	0.078	0.031	0.001	0.002	0.003	0.008	0.020	0.059	0.004	0.055	296.755	0.713	0.7427526E-01	4.477855	0.8662654E-04	1.713419
09032011	04	0.063	0.070	0.027	0.001	0.002	0.003	0.009	0.021	0.055	0.004	0.055	296.357	0.741	0.9258866E-01	4.851984	0.7374473E-04	1.818188
09032011	05	0.070	0.067	0.022	0.001	0.003	0.003	0.010	0.023	0.050	0.004	0.054	296.057	0.761	0.1190232	4.821754	0.4937397E-04	1.989707
09032011	06	0.082	0.069	0.019	0.001	0.003	0.003	0.011	0.026	0.043	0.005	0.055	295.799	0.781	0.1503105	4.945543	0.3549926E-04	2.143995
09032011	07	0.094	0.074	0.016	0.001	0.003	0.004	0.012	0.030	0.035	0.005	0.055	295.800	0.796	0.1897296	4.789684	0.1872085E-04	2.407981
09032011	08	0.089	0.075	0.029	0.001	0.004	0.005	0.013	0.032	0.030	0.007	0.055	297.656	0.748	0.1106701	3.694540	0.1387597E-04	2.425297
09032011	09	0.067	0.068	0.054	0.001	0.003	0.004	0.011	0.027	0.037	0.006	0.053	299.971	0.655	0.2941465E-01	2.871344	0.4143666E-04	1.840700
09032011	10	0.044	0.072	0.081	0.000	0.002	0.003	0.008	0.017	0.057	0.003	0.051	302.126	0.578	NaN	4.381267	0.2568396E-01	-0.7680623
09032011	11	0.029	0.072	0.098	0.000	0.002	0.002	0.006	0.013	0.068	0.002	0.052	304.001	0.522	NaN	3.427641	0.6239436E-01	-1.260150
09032011	12	0.010	0.069	0.092	0.000	0.002	0.002	0.005	0.010	0.078	0.001	0.055	305.648	0.472	0.8348286E-02	3.752205	0.8976844E-02	-0.3788371
09032011	13	0.003	0.060	0.066	0.000	0.001	0.001	0.004	0.008	0.069	0.001	0.053	306.959	0.428	0.1860857E-03	2.006956	0.7258846E-02	-0.5583298
09032011	14	0.003	0.048	0.053	0.000	0.001	0.001	0.003	0.007	0.067	0.000	0.051	307.542	0.403	0.1091957E-03	1.750154	0.6924982E-02	-0.5973423
09032011	15	0.003	0.052	0.047	0.000	0.001	0.001	0.003	0.006	0.071	0.000	0.051	307.261	0.396	0.1692772E-03	1.856384	0.7529060E-02	-0.6080729
09032011	16	0.003	0.073	0.044	0.000	0.001	0.001	0.003	0.006	0.075	0.000	0.054	306.533	0.401	0.1430511E-03	1.940540	0.7877971E-02	-0.6084918
09032011	17	0.002	0.103	0.041	0.000	0.001	0.001	0.003	0.006	0.080	0.000	0.060	305.402	0.413	0.7021427E-04	2.067184	0.7799354E-02	-0.5766795
09032011	18	0.002	0.128	0.036	0.000	0.001	0.001	0.003	0.007	0.090	0.000	0.068	304.138	0.426	0.7987022E-04	2.469862	0.1030310E-01	-0.6202950
09032011	19	0.006	0.151	0.031	0.000	0.001	0.002	0.004	0.011	0.113	0.000	0.076	302.702	0.445	0.6694138E-02	3.588017	0.7940089E-02	-0.3449709
09032011	20	0.022	0.160	0.029	0.000	0.002	0.002	0.005	0.016	0.125	0.001	0.083	301.537	0.462	NaN	4.235055	0.5680641E-02	-0.1275383
09032011	21	0.028	0.151	0.026	0.001	0.002	0.003	0.006	0.018	0.129	0.001	0.089	300.669	0.489	0.2491683E-01	4.511277	0.3595717E-03	1.098514
09032011	22	0.025	0.127	0.020	0.001	0.002	0.003	0.006	0.019	0.127	0.002	0.088	300.052	0.517	0.2986324E-01	4.782630	0.3476426E-03	1.138534
09032011	23	0.008	0.105	0.017	0.001	0.002	0.003	0.006	0.017	0.127	0.001	0.084	299.524	0.547	0.8341670E-03	7.289855	0.7863427E-02	-0.3289298E-01
09032011	24	0.007	0.093	0.014	0.002	0.002	0.002	0.006	0.015	0.111	0.001	0.078	298.945	0.582	0.6424785E-03	5.780106	0.6184854E-02	-0.2939372E-01
09042011	01	0.006	0.079	0.011	0.002	0.002	0.002	0.005	0.014	0.101	0.001	0.072	298.249	0.623	0.6561875E-03	5.706230	0.5802587E-02	-0.7272368E-02
09042011	02	0.006	0.061	0.010	0.002	0.002	0.002	0.005	0.012	0.092	0.001	0.065	297.648	0.655	0.7278323E-03	6.133500	0.5526355E-02	0.4526960E-01
09042011	03	0.005	0.046	0.009	0.001	0.002	0.001	0.004	0.011	0.086	0.001	0.060	297.179	0.680	0.7624626E-03	5.611582	0.5052438E-02	0.4558430E-01
09042011	04	0.006	0.038	0.009	0.001	0.002	0.001	0.004	0.011	0.081	0.001	0.055	296.769	0.706	0.1164734E-02	7.039716	0.5329676E-02	0.1208543
09042011	05	0.013	0.038	0.009	0.001	0.002	0.001	0.004	0.012	0.073	0.001	0.052	296.392	0.731	0.5131269E-01	5.219574	0.2443011E-03	1.329710
09042011	06	0.025	0.043	0.010	0.001	0.002	0.002	0.005	0.013	0.064	0.001	0.050	296.075	0.755	0.4955477E-01	5.442063	0.2325620E-03	1.369225
09042011	07	0.032	0.048	0.011	0.001	0.002	0.002	0.005	0.015	0.058	0.001	0.049	295.892	0.778	0.6047326E-01	5.443863	0.1738955E-03	1.495619
09042011	08	0.021	0.049	0.017	0.001	0.002	0.002	0.005	0.013	0.059	0.002	0.047	296.883	0.783	0.3532338E-01	5.417182	0.2612066E-03	1.316789
09042011	09	0.007	0.074	0.031	0.001	0.002	0.001	0.004	0.010	0.058	0.001	0.045	298.372	0.757	0.1881719E-03	5.977209	0.4780625E-02	0.9701373E-01
09042011	10	0.001	0.104	0.046	0.000	0.001	0.001	0.003	0.007	0.047	0.001	0.044	299.651	0.726	0.7386208E-03	4.412411	0.5313450E-02	-0.8070057E-01
09042011	11	0.001	0.087	0.055	0.000	0.001	0.001	0.002	0.006	0.042	0.001	0.045	300.789	0.692	0.2544522E-03	4.135918	0.3667111E-02	0.5224786E-01
09042011	12	0.000	0.053	0.058	0.000	0.001	0.001	0.002	0.005	0.041	0.001	0.055	299.970	0.694	0.7665157E-04	5.923310	0.7742779E-02	-0.1163324
09042011	13	0.000	0.042	0.061	0.000	0.001	0.001	0.002	0.006	0.045	0.001	0.060	300.023	0.692	0.8362532E-04	6.353880	0.8113440E-02	-0.1061660
09042011	14	0.000	0.034	0.061	0.000	0.001	0.001	0.002	0.006	0.046	0.001	0.063	300.320	0.692	0.7611513E-04	6.848371	0.9882484E-02	-0.1592788
09042011	15	0.000	0.023	0.056	0.000	0.001	0.001	0.002	0.005	0.042	0.000	0.065	300.243	0.695	0.6932020E-04	8.041592	0.1654399E-01	-0.3132982
09042011	16	0.000	0.020	0.049	0.000	0.001	0.001	0.002	0.006	0.041	0.000	0.065	298.615	0.752	0.1778603E-03	9.500162	0.1808924E-01	-0.2796893
09042011	17	0.000	0.019	0.046	0.000	0.001	0.001	0.003	0.007	0.046	0.000	0.065	298.234	0.777	0.3717542E-03	9.913306	0.1327104E-01	-0.1266864
09042011	18	0.000	0.017	0.036	0.000	0.001	0.001	0.002	0.007	0.044	0.000	0.064	297.000	0.837	0.9785891E-03	13.28867	0.1717239E-01	-0.1113493
09042011	19	0.000	0.017	0.029	0.000	0.001	0.001	0.003	0.008	0.044	0.000	0.064	296.165	0.893	0.2834380E-02	18.02984	0.1804080E-01	-0.2639566E-03
09042011	20	0.000	0.013	0.026	0.000	0.001	0.001	0.003	0.008	0.037	0.000	0.061	295.890	0.910	0.3677487E-02	21.01845	0.2079745E-01	0.4590591E-02
09042011	21	0.000	0.008	0.021	0.000	0.001	0.001	0.002	0.006	0.022	0.000	0.045	295.668	0.921	0.2873540E-02	17.75107	0.1904796E-01	-0.3062383E-01
09042011	22	0.000	0.002	0.009	0.000	0.000	0.000	0.001	0.002	0.009	0.000	0.019	295.620	0.921	0.1064241E-02	7.908751	0.9780871E-02	-0.9226961E-01
09042011	23	0.000	0.004	0.006	0.000	0.000	0.000	0.001	0.002	0.011	0.000	0.015	295.628	0.916	0.1471341E-02	5.526642	0.4619741E-02	0.7784369E-01
09042011	24	0.001	0.004	0.006	0.000	0.000	0.000	0.001	0.002	0.013	0.000	0.014	295.615	0.912	0.2290189E-02	4.314751	0.2981260E-02	0.1605559
09052011	01	0.000	0.004	0.007	0.000	0.000	0.000	0.001	0.002	0.011	0.000	0.015	295.534	0.914	0.1158893E-02	4.963485	0.4499859E-02	0.4258785E-01
09052011	02	0.000	0.004	0.008	0.000	0.000	0.000	0.001	0.002	0.011	0.000	0.016	295.486	0.914	0.1097620E-02	5.451291	0.5331126E-02	0.9680395E-02
09052011	03	0.000	0.004	0.008	0.000	0.000	0.000	0.001	0.002	0.012	0.000	0.017	295.463	0.914	0.1199543E-02	5.821661	0.5615150E-02	0.1568555E-01
09052011	04	0.000	0.002	0.008	0.000	0.000	0.000	0.001	0.001	0.009	0.000	0.014	295.440	0.914	0.8674860E-03	5.198354	0.5679775E-02	-0.3846527E-01
09052011	05	0.000	0.002	0.006	0.000	0.000	0.000	0.001	0.001	0.007	0.000	0.011	295.403	0.915	0.9121895E-03	4.408509	0.4297311E-02	0.1109495E-01
09052011	06	0.001	0.003	0.004	0.000	0.000	0.000	0.000	0.001	0.007	0.000	0.007	295.564	0.906	0.1385212E-02	2.129630	0.1768037E-02	0.8081268E-01
09052011	07	0.013	0.008	0.004	0.000	0.000	0.001	0.001	0.003	0.003	0.000	0.006	295.486	0.919	NaN	2.411451	0.3973762E-04	1.783077
09052011	08	0.012	0.008	0.005	0.000	0.001	0.001	0.001	0.003	0.005	0.000	0.007	295.351	0.948	NaN	5.108812	0.6861408E-04	1.871907
09052011	09	0.003	0.004	0.004	0.000	0.000	0.000	0.000	0.000	0.009	0.000	0.005	295.919	0.950	0.5638778E-02	3.311258	0.2612779E-03	1.102890
09052011	10	0.004	0.005	0.007	0.000	0.000	0.000	0.000	0.000	0.007	0.000	0.004	297.452	0.904	0.1419425E-02	1.311476	0.2261395E-03	0.7633839
09052011	11	0.007	0.007	0.013	0.000	0.000	0.000	0.000	0.000	0.007	0.000	0.004	298.342	0.878	0.1683056E-02	1.101928	0.1440830E-03	0.8835407
09052011	12	0.007	0.006	0.015	0.000	0.000	0.000	0.000	0.000	0.007	0.000	0.004	298.313	0.887	0.1894653E-02	1.197605	0.1394067E-03	0.9340299
09052011	13	0.003	0.004	0.018	0.000	0.000	0.000	0.000	0.000	0.007	0.000	0.004	299.459	0.866	0.5090237E-03	1.023018	0.3770637E-03	0.4334685
09052011	14	0.002	0.002	0.009	0.000	0.000	0.000	0.000	0.000	0.005	0.000	0.003	299.650	0.862	0.2205372E-03	0.7159904	0.4472014E-03	0.2044041
09052011	15	0.003	0.002	0.011	0.000	0.000	0.000	0.000	0.000	0.005	0.000	0.003	299.340	0.874	0.3648400E-03	0.7672634	0.3016680E-03	0.4054152
09052011	16	0.004	0.002	0.011	0.000	0.000	0.000	0.000	0.000	0.004	0.000	0.002	298.479	0.895	0.7255673E-03	0.6557378	0.1019770E-03	0.8082278
09052011	17	0.004	0.002	0.008	0.000	0.000	0.000	0.000	0.000	0.003	0.000	0.002	297.654	0.928	0.1064003E-02	0.9345794	0.1115146E-03	0.9232844
09052011	18	0.001	0.001	0.002	0.000	0.000	0.000	0.000	0.000	0.004	0.000	0.002	296.983	0.951	0.1069129E-02	1.324503	0.2056341E-03	0.8089579
09052011	19	0.005	0.002	0.001	0.000	0.000	0.000	0.000	0.000	0.004	0.000	0.002	296.773	0.960	0.4847348E-02	1.680672	0.6011739E-04	1.446483
09052011	20	0.007	0.001	0.002	0.000	0.000	0.000	0.000	0.000	0.002	0.000	0.002	296.465	0.969	0.8378685E-02	2.298851	0.5961021E-04	1.586190
09052011	21	0.005	0.001	0.002	0.000	0.000	0.000	0.000	0.000	0.002	0.000	0.001	296.437	0.959	0.2549887E-02	0.8403361	0.2990326E-04	1.448735
09052011	22	0.004	0.001	0.002	0.000	0.000	0.000	0.000	0.000	0.002	0.000	0.001	296.346	0.955	0.2117753E-02	0.8403361	0.3686130E-04	1.357882
09052011	23	0.002	0.001	0.002	0.000	0.000	0.000	0.000	0.000	0.004	0.000	0.002	296.353	0.944	0.1305878E-02	1.092896	0.1341473E-03	0.9109970
09052011	24	0.000	0.002	0.003	0.000	0.000	0.000	0.000	0.000	0.003	0.000	0.004	296.020	0.935	0.5723834E-03	2.315020	0.1828548E-02	0.1024484
09062011	01	0.000	0.004	0.005	0.000	0.000	0.000	0.000	0.000	0.004	0.000	0.006	295.616	0.932	0.5659461E-03	3.077269	0.3078324E-02	-0.1488188E-03
09062011	02	0.000	0.006	0.006	0.000	0.001	0.000	0.000	0.000	0.006	0.000	0.010	295.194	0.930	0.000000	5.120954	0.5128514E-02	-0.6407743E-03
09062011	03	0.000	0.007	0.007	0.000	0.001	0.000	0.000	0.000	0.006	0.000	0.015	294.422	0.940	0.000000	9.265489	0.1046572E-01	-0.5290073E-01
09062011	04	0.000	0.009	0.008	0.000	0.000	0.000	0.000	0.000	0.008	0.000	0.017	293.734	0.948	0.2853096E-02	12.34977	0.1189187E-01	0.1640887E-01
09062011	05	0.000	0.011	0.009	0.000	0.000	0.000	0.000	0.000	0.011	0.000	0.016	293.001	0.948	0.3900886E-02	11.17385	0.8528724E-02	0.1173188
09062011	06	0.001	0.013	0.009	0.000	0.000	0.000	0.000	0.000	0.014	0.000	0.014	292.136	0.946	0.7237494E-02	9.160560	0.4270358E-02	0.3314577
09062011	07	0.001	0.022	0.013	0.000	0.000	0.000	0.000	0.000	0.014	0.000	0.013	291.232	0.952	0.8506060E-02	8.452698	0.3601115E-02	0.3705584
09062011	08	0.000	0.035	0.017	0.000	0.001	0.000	0.000	0.000	0.015	0.000	0.016	290.975	0.929	0.000000	7.580523	0.5558555E-02	0.1347373
09062011	09	0.001	0.046	0.017	0.000	0.001	0.000	0.000	0.000	0.016	0.000	0.015	290.701	0.917	0.000000	6.086214	0.4050664E-02	0.1768210
09062011	10	0.001	0.055	0.018	0.000	0.001	0.000	0.000	0.000	0.016	0.000	0.012	290.674	0.904	0.000000	3.775373	0.2614609E-02	0.1595531
09062011	11	0.001	0.057	0.021	0.000	0.001	0.000	0.000	0.000	0.018	0.000	0.012	290.775	0.899	0.000000	3.818189	0.2324141E-02	0.2155950
09062011	12	0.010	0.049	0.023	0.000	0.001	0.001	0.000	0.000	0.019	0.001	0.011	290.788	0.884	NaN	4.969843	0.1008330E-01	-0.3072601
09062011	13	0.012	0.048	0.028	0.000	0.001	0.001	0.000	0.000	0.021	0.002	0.011	290.805	0.873	NaN	5.280164	0.1194531E-01	-0.3545499
09062011	14	0.012	0.054	0.037	0.000	0.001	0.001	0.000	0.000	0.026	0.002	0.014	290.645	0.869	NaN	5.879320	0.2109150E-01	-0.5547804
09062011	15	0.013	0.059	0.039	0.000	0.001	0.001	0.000	0.000	0.031	0.003	0.017	290.375	0.872	NaN	6.645866	0.2335694E-01	-0.5458643
09062011	16	0.016	0.061	0.035	0.000	0.001	0.001	0.001	0.000	0.034	0.005	0.017	290.062	0.879	NaN	8.550005	0.1394091E-01	-0.2123248
09062011	17	0.019	0.059	0.027	0.000	0.001	0.001	0.001	0.001	0.033	0.005	0.017	289.731	0.888	NaN	9.904505	0.4457273E-02	0.3467635
09062011	18	0.020	0.054	0.019	0.000	0.001	0.001	0.001	0.001	0.027	0.004	0.014	289.406	0.900	NaN	9.602439	0.4459502E-03	1.333095
09062011	19	0.021	0.049	0.013	0.000	0.001	0.001	0.001	0.001	0.019	0.003	0.011	289.217	0.909	NaN	7.965035	0.1193784E-03	1.824262
09062011	20	0.020	0.043	0.010	0.000	0.001	0.001	0.001	0.001	0.014	0.002	0.009	289.108	0.914	NaN	6.160986	0.7196510E-04	1.932528
09062011	21	0.018	0.034	0.009	0.000	0.002	0.001	0.001	0.001	0.011	0.001	0.008	288.984	0.911	NaN	5.257944	0.5680385E-04	1.966438
09062011	22	0.015	0.029	0.010	0.000	0.002	0.001	0.001	0.001	0.011	0.001	0.008	288.855	0.908	NaN	5.508155	0.9540813E-04	1.761421
09062011	23	0.013	0.027	0.012	0.001	0.002	0.001	0.001	0.001	0.012	0.001	0.009	288.733	0.906	0.1089480	3.266145	0.3693891E-04	1.946551
09062011	24	0.011	0.027	0.015	0.001	0.003	0.001	0.001	0.002	0.015	0.002	0.011	288.634	0.906	0.1242819	3.825317	0.4379529E-04	1.941240
09072011	01	0.009	0.028	0.017	0.001	0.003	0.001	0.002	0.003	0.020	0.002	0.014	288.389	0.911	0.1467257	4.723462	0.5572062E-04	1.928244
09072011	02	0.009	0.029	0.019	0.001	0.003	0.001	0.002	0.003	0.027	0.003	0.018	288.416	0.913	0.1547230	6.317882	0.9874078E-04	1.806075
09072011	03	0.009	0.034	0.022	0.001	0.003	0.001	0.002	0.003	0.034	0.004	0.022	288.608	0.892	0.1263905	6.335519	0.1534685E-03	1.615763
09072011	04	0.010	0.047	0.028	0.001	0.003	0.001	0.002	0.004	0.041	0.006	0.025	288.736	0.885	0.1629786	7.430048	0.1475068E-03	1.702179
09072011	05	0.014	0.061	0.028	0.001	0.003	0.001	0.002	0.004	0.048	0.009	0.027	288.849	0.885	0.2317690	8.708246	0.1224306E-03	1.852041
09072011	06	0.022	0.073	0.024	0.001	0.003	0.001	0.002	0.004	0.057	0.013	0.029	288.992	0.892	0.3525718	10.31159	0.8767065E-04	2.070472
09072011	07	0.029	0.078	0.019	0.002	0.003	0.002	0.002	0.004	0.065	0.018	0.031	289.142	0.902	0.4886178	13.38748	0.7065781E-04	2.277539
09072011	08	0.032	0.071	0.018	0.002	0.003	0.002	0.002	0.004	0.072	0.020	0.034	289.447	0.903	0.5123441	14.71854	0.7551901E-04	2.289809
09072011	09	0.035	0.062	0.019	0.002	0.003	0.002	0.003	0.006	0.077	0.021	0.039	290.079	0.892	0.4814586	14.15774	0.7885583E-04	2.254160
09072011	10	0.043	0.061	0.023	0.001	0.003	0.003	0.004	0.011	0.068	0.019	0.042	291.079	0.850	0.3666794	9.264807	0.5845823E-04	2.199991
09072011	11	0.041	0.095	0.036	0.001	0.003	0.002	0.005	0.014	0.059	0.014	0.042	291.928	0.816	0.2363626	6.710390	0.6063528E-04	2.044022
09072011	12	0.023	0.181	0.063	0.000	0.003	0.002	0.004	0.011	0.057	0.008	0.040	293.088	0.760	NaN	6.866037	0.3087185E-01	-0.6528565
09072011	13	0.006	0.211	0.087	0.000	0.002	0.001	0.003	0.007	0.059	0.003	0.039	293.452	0.748	0.2694094E-01	6.740895	0.5435295E-02	0.9349442E-01
09072011	14	0.003	0.168	0.104	0.000	0.002	0.001	0.003	0.007	0.059	0.002	0.041	294.084	0.739	0.1747626E-01	4.888637	0.4610817E-02	0.2540988E-01
09072011	15	0.002	0.129	0.114	0.000	0.002	0.001	0.002	0.006	0.055	0.001	0.042	293.880	0.737	0.3799736E-02	4.647917	0.6123756E-02	-0.1197595
09072011	16	0.002	0.108	0.112	0.000	0.002	0.001	0.002	0.007	0.056	0.001	0.042	293.408	0.756	0.6900966E-02	4.969412	0.5334476E-02	-0.3078673E-01
09072011	17	0.003	0.094	0.095	0.000	0.002	0.001	0.003	0.008	0.062	0.001	0.043	293.064	0.770	0.2285618E-01	5.926422	0.4803930E-02	0.9119590E-01
09072011	18	0.004	0.086	0.075	0.000	0.002	0.002	0.003	0.010	0.069	0.001	0.046	292.722	0.779	0.3856432E-01	8.892356	0.5919418E-02	0.1767378
09072011	19	0.005	0.075	0.056	0.000	0.002	0.002	0.003	0.011	0.074	0.001	0.049	292.223	0.807	0.5529106E-01	11.23459	0.6201486E-02	0.2580614
09072011	20	0.012	0.059	0.041	0.000	0.002	0.001	0.004	0.011	0.073	0.004	0.050	291.666	0.840	NaN	10.22247	0.2081666E-01	-0.3088553
09072011	21	0.015	0.044	0.027	0.001	0.002	0.001	0.004	0.011	0.074	0.005	0.051	291.351	0.859	0.1354244	10.11784	0.3313679E-03	1.484777
09072011	22	0.005	0.065	0.032	0.001	0.003	0.001	0.004	0.010	0.079	0.002	0.051	291.214	0.863	0.9689891E-01	10.13465	0.5105240E-03	1.297793
09072011	23	0.003	0.088	0.043	0.001	0.002	0.001	0.004	0.009	0.075	0.003	0.053	290.992	0.859	0.000000	10.44876	0.3732692E-02	0.4470425
09072011	24	0.001	0.088	0.044	0.000	0.002	0.001	0.004	0.009	0.070	0.003	0.055	290.643	0.866	0.2054250E-01	11.41854	0.6851926E-02	0.2217979
09082011	01	0.002	0.078	0.038	0.001	0.002	0.001	0.004	0.010	0.071	0.003	0.055	290.394	0.874	0.000000	11.26707	0.5107069E-02	0.3436394
09082011	02	0.001	0.098	0.049	0.001	0.002	0.001	0.004	0.009	0.064	0.004	0.056	290.153	0.880	0.000000	12.35764	0.7711604E-02	0.2047908
09082011	03	0.000	0.105	0.053	0.000	0.002	0.001	0.003	0.007	0.047	0.002	0.057	289.916	0.883	0.4913211E-02	14.07602	0.1374671E-01	0.1028098E-01
09082011	04	0.000	0.105	0.053	0.000	0.001	0.001	0.002	0.006	0.040	0.002	0.057	289.655	0.886	0.4294038E-02	16.47103	0.1926830E-01	-0.6812274E-01
09082011	05	0.000	0.108	0.055	0.000	0.001	0.001	0.002	0.004	0.033	0.002	0.060	289.642	0.879	0.2758801E-02	17.96584	0.2862346E-01	-0.2022746
09082011	06	0.000	0.092	0.046	0.000	0.001	0.001	0.002	0.005	0.037	0.001	0.060	289.647	0.864	0.2098680E-02	15.00219	0.2388710E-01	-0.2020088
09082011	07	0.000	0.079	0.039	0.000	0.001	0.001	0.002	0.007	0.047	0.001	0.056	289.429	0.866	0.3933072E-02	12.79859	0.1375505E-01	-0.3129982E-01
09082011	08	0.000	0.067	0.036	0.000	0.001	0.001	0.002	0.008	0.049	0.001	0.052	289.634	0.849	0.3688991E-02	9.806647	0.1028399E-01	-0.2064124E-01
09082011	09	0.001	0.059	0.035	0.000	0.001	0.001	0.003	0.008	0.054	0.001	0.050	290.523	0.812	0.3366649E-02	7.193644	0.8849949E-02	-0.8999182E-01
09082011	10	0.001	0.058	0.040	0.000	0.001	0.001	0.002	0.008	0.051	0.001	0.048	291.865	0.765	0.1610756E-02	5.685573	0.8878733E-02	-0.1935768
09082011	11	0.000	0.058	0.058	0.000	0.001	0.001	0.002	0.006	0.041	0.001	0.049	294.130	0.698	0.2252460E-03	4.869230	0.4851943E-02	0.1544563E-02
09082011	12	0.000	0.058	0.075	0.000	0.001	0.001	0.002	0.005	0.038	0.001	0.052	294.516	0.653	0.5865097E-04	4.870686	0.7133559E-02	-0.1657161
09082011	13	0.000	0.066	0.089	0.000	0.001	0.001	0.002	0.006	0.041	0.001	0.057	294.940	0.634	0.4178286E-04	4.975716	0.7756375E-02	-0.1928032
09082011	14	0.000	0.076	0.100	0.000	0.001	0.001	0.002	0.006	0.047	0.001	0.064	295.429	0.621	0.3719330E-04	5.473048	0.8799528E-02	-0.2062301
09082011	15	0.000	0.087	0.091	0.000	0.001	0.001	0.002	0.007	0.054	0.001	0.070	295.199	0.622	0.4822016E-04	5.722070	0.7506884E-02	-0.1179065
09082011	16	0.000	0.093	0.077	0.000	0.001	0.001	0.003	0.009	0.067	0.001	0.076	294.846	0.632	0.1582503E-03	5.749342	0.4418734E-02	0.1143204
09082011	17	0.000	0.089	0.069	0.000	0.001	0.001	0.003	0.009	0.072	0.001	0.078	294.926	0.643	0.2224445E-03	6.091830	0.5033931E-02	0.8284049E-01
09082011	18	0.000	0.083	0.069	0.000	0.001	0.001	0.003	0.008	0.072	0.001	0.080	294.417	0.648	0.2095699E-03	6.655128	0.5652608E-02	0.7090756E-01
09082011	19	0.000	0.069	0.056	0.000	0.001	0.001	0.003	0.010	0.081	0.001	0.085	293.826	0.659	0.3513098E-03	7.090558	0.7111836E-02	-0.1301355E-02
09082011	20	0.000	0.056	0.054	0.000	0.001	0.001	0.003	0.010	0.086	0.001	0.091	293.374	0.674	0.3911853E-03	7.976438	0.8124364E-02	-0.7980387E-02
09082011	21	0.000	0.044	0.052	0.000	0.001	0.001	0.004	0.011	0.090	0.001	0.093	292.783	0.691	0.6037354E-03	8.642081	0.1033168E-01	-0.7755245E-01
09082011	22	0.000	0.036	0.053	0.000	0.001	0.001	0.004	0.012	0.098	0.001	0.093	291.796	0.726	0.1313686E-02	9.818342	0.1806927E-01	-0.2649024
09082011	23	0.001	0.035	0.055	0.000	0.001	0.002	0.005	0.014	0.109	0.001	0.094	290.990	0.763	0.3843784E-02	10.70010	0.1876040E-01	-0.2438542
09082011	24	0.001	0.036	0.058	0.000	0.002	0.002	0.005	0.015	0.114	0.002	0.094	290.304	0.798	0.9253561E-02	12.80123	0.1523021E-01	-0.7545422E-01
09092011	01	0.001	0.036	0.058	0.000	0.002	0.002	0.005	0.015	0.117	0.002	0.093	289.625	0.833	0.1732022E-01	14.90185	0.1323090E-01	0.5165099E-01
09092011	02	0.001	0.038	0.061	0.000	0.002	0.002	0.005	0.015	0.117	0.003	0.092	289.064	0.860	0.2743584E-01	17.71872	0.1245009E-01	0.1532598
09092011	03	0.001	0.039	0.064	0.000	0.002	0.002	0.006	0.016	0.119	0.004	0.092	288.728	0.875	0.4314619E-01	20.36294	0.1149180E-01	0.2484523
09092011	04	0.001	0.042	0.067	0.000	0.002	0.002	0.006	0.017	0.123	0.005	0.091	288.477	0.886	0.6386399E-01	21.78204	0.1037551E-01	0.3220890
09092011	05	0.002	0.050	0.068	0.000	0.002	0.002	0.007	0.020	0.132	0.009	0.091	288.244	0.898	0.1135248	26.48095	0.1031662E-01	0.4093961
09092011	06	0.004	0.062	0.058	0.001	0.003	0.003	0.008	0.023	0.144	0.021	0.091	288.040	0.908	0.3291754	31.17915	0.9214734E-03	1.529382
09092011	07	0.010	0.076	0.037	0.002	0.003	0.004	0.009	0.028	0.152	0.045	0.091	287.930	0.917	0.5690906	40.27232	0.4655521E-03	1.937038
09092011	08	0.010	0.092	0.059	0.002	0.003	0.004	0.009	0.029	0.146	0.042	0.090	289.284	0.875	0.4091456	24.70058	0.3678269E-03	1.827064
09092011	09	0.001	0.138	0.109	0.000	0.002	0.003	0.007	0.020	0.109	0.006	0.090	291.631	0.784	0.1449710E-01	10.69844	0.9807575E-02	0.3775885E-01
09092011	10	0.000	0.221	0.109	0.000	0.002	0.002	0.005	0.013	0.077	0.002	0.095	293.903	0.693	0.3977418E-03	8.935030	0.8280512E-02	0.3303880E-01
09092011	11	0.000	0.194	0.111	0.000	0.001	0.001	0.004	0.010	0.060	0.001	0.101	294.988	0.628	0.4863739E-04	9.996922	0.2812939E-01	-0.4492940
09092011	12	0.000	0.176	0.114	0.000	0.001	0.001	0.003	0.010	0.055	0.001	0.103	295.789	0.592	0.2318621E-04	9.651071	0.3543979E-01	-0.5649157
09092011	13	0.000	0.167	0.106	0.000	0.001	0.001	0.003	0.009	0.053	0.001	0.102	297.619	0.541	0.9059906E-05	8.572774	0.3640337E-01	-0.6280202
09092011	14	0.000	0.143	0.106	0.000	0.001	0.001	0.003	0.008	0.048	0.001	0.102	298.802	0.514	0.5662441E-05	8.430422	0.4228606E-01	-0.7003478
09092011	15	0.000	0.130	0.106	0.000	0.001	0.001	0.003	0.008	0.049	0.001	0.100	298.475	0.513	0.5364418E-05	8.089862	0.3912070E-01	-0.6844655
09092011	16	0.000	0.134	0.100	0.000	0.001	0.001	0.003	0.009	0.057	0.001	0.099	297.610	0.523	0.6079674E-05	7.412899	0.2880666E-01	-0.5895048
09092011	17	0.000	0.141	0.094	0.000	0.001	0.002	0.004	0.014	0.076	0.001	0.099	297.402	0.533	0.2342463E-04	5.384422	0.3352988E-02	0.2057071
09092011	18	0.000	0.143	0.096	0.000	0.001	0.002	0.004	0.014	0.077	0.001	0.098	296.870	0.540	0.4518032E-04	5.414936	0.2621544E-02	0.3150361
09092011	19	0.002	0.135	0.083	0.000	0.002	0.003	0.006	0.021	0.103	0.001	0.097	295.654	0.552	0.4995465E-03	4.663810	0.2517013E-01	-0.7321447
09092011	20	0.016	0.131	0.083	0.000	0.002	0.003	0.008	0.030	0.125	0.003	0.094	294.276	0.590	0.4580522E-01	10.21989	0.8897157E-02	0.6019514E-01
09092011	21	0.045	0.116	0.076	0.000	0.002	0.004	0.008	0.032	0.102	0.008	0.088	293.109	0.634	NaN	7.531498	0.2351478E-01	-0.4944596
09092011	22	0.046	0.094	0.065	0.000	0.002	0.003	0.008	0.031	0.092	0.010	0.080	292.161	0.675	NaN	8.310843	0.1295311E-01	-0.1927291
09092011	23	0.039	0.074	0.057	0.001	0.002	0.003	0.008	0.027	0.090	0.011	0.075	291.305	0.719	0.2018889	6.950682	0.1435828E-03	1.684925
09092011	24	0.028	0.064	0.054	0.001	0.002	0.003	0.007	0.023	0.094	0.012	0.071	290.536	0.767	0.2256799	8.545641	0.1768527E-03	1.684133
09102011	01	0.020	0.063	0.053	0.001	0.002	0.002	0.006	0.019	0.099	0.013	0.069	289.813	0.818	0.2273477	11.15366	0.2849768E-03	1.592608
09102011	02	0.014	0.067	0.052	0.001	0.002	0.002	0.006	0.017	0.103	0.015	0.067	289.257	0.848	0.2503319	13.54731	0.3342672E-03	1.607759
09102011	03	0.011	0.073	0.053	0.001	0.002	0.002	0.005	0.016	0.106	0.017	0.066	288.808	0.867	0.2648758	15.89196	0.3986504E-03	1.600585
09102011	04	0.010	0.082	0.054	0.001	0.002	0.002	0.005	0.016	0.110	0.020	0.066	288.443	0.879	0.2995656	17.89822	0.4049529E-03	1.645405
09102011	05	0.011	0.092	0.053	0.001	0.002	0.002	0.006	0.016	0.116	0.028	0.066	288.134	0.887	0.3683792	21.23018	0.3787259E-03	1.748629
09102011	06	0.012	0.104	0.050	0.002	0.002	0.002	0.006	0.018	0.125	0.040	0.066	287.900	0.891	0.4560841	23.18031	0.2971405E-03	1.892157
09102011	07	0.014	0.112	0.048	0.003	0.002	0.002	0.007	0.020	0.134	0.053	0.066	287.720	0.898	0.5500153	28.70029	0.2767697E-03	2.015768
09102011	08	0.020	0.103	0.051	0.002	0.002	0.003	0.007	0.021	0.135	0.056	0.067	289.306	0.838	0.4735481	16.56688	0.1353968E-03	2.087632
09102011	09	0.019	0.117	0.084	0.001	0.002	0.002	0.006	0.016	0.106	0.023	0.064	292.287	0.715	0.1311466	6.923527	0.2214806E-03	1.494992
09102011	10	0.023	0.123	0.100	0.000	0.002	0.002	0.005	0.015	0.094	0.009	0.063	295.002	0.601	NaN	5.306026	0.7268540E-01	-1.136678
09102011	11	0.008	0.200	0.121	0.000	0.002	0.002	0.005	0.012	0.096	0.003	0.067	297.435	0.487	0.1337975E-01	4.102574	0.6510263E-02	-0.2005422
09102011	12	0.001	0.217	0.117	0.000	0.001	0.001	0.004	0.010	0.086	0.000	0.067	298.849	0.438	0.2115965E-03	2.447140	0.1771427E-01	-0.8596644
09102011	13	0.001	0.175	0.118	0.000	0.001	0.001	0.004	0.010	0.081	0.000	0.066	300.372	0.400	0.7146597E-04	1.979674	0.2041369E-01	-1.013328
09102011	14	0.001	0.155	0.124	0.000	0.001	0.001	0.004	0.010	0.080	0.000	0.067	301.307	0.377	0.3850460E-04	1.789373	0.2354615E-01	-1.119219
09102011	15	0.001	0.138	0.120	0.000	0.001	0.001	0.004	0.010	0.077	0.000	0.065	301.239	0.376	0.3790855E-04	1.728767	0.2265503E-01	-1.117428
09102011	16	0.001	0.125	0.110	0.000	0.001	0.001	0.004	0.010	0.074	0.000	0.061	300.557	0.389	0.6562471E-04	1.760701	0.1765125E-01	-1.001090
09102011	17	0.001	0.118	0.101	0.000	0.001	0.001	0.004	0.010	0.074	0.000	0.059	299.534	0.406	0.1398921E-03	1.920742	0.1392857E-01	-0.8604373
09102011	18	0.004	0.118	0.092	0.000	0.001	0.002	0.005	0.011	0.080	0.000	0.059	298.464	0.422	0.4061282E-02	2.390341	0.5640199E-02	-0.3728345
09102011	19	0.043	0.131	0.083	0.000	0.002	0.002	0.006	0.017	0.075	0.001	0.060	296.777	0.447	NaN	3.133460	0.3617447E-01	-1.062378
09102011	20	0.077	0.143	0.089	0.000	0.002	0.003	0.008	0.022	0.064	0.003	0.060	295.377	0.477	NaN	3.922994	0.7707276E-02	-0.2932833
09102011	21	0.082	0.138	0.089	0.000	0.002	0.003	0.008	0.024	0.058	0.005	0.059	293.907	0.530	NaN	4.670714	0.5402621E-02	-0.6322119E-01
09102011	22	0.078	0.123	0.077	0.000	0.002	0.003	0.008	0.024	0.053	0.007	0.056	292.769	0.581	NaN	5.279478	0.1286114E-02	0.6133116
09102011	23	0.070	0.107	0.063	0.000	0.002	0.003	0.008	0.024	0.050	0.008	0.053	291.822	0.632	NaN	5.658385	0.2116776E-03	1.427018
09102011	24	0.061	0.093	0.051	0.000	0.002	0.003	0.008	0.023	0.049	0.009	0.050	290.965	0.688	NaN	6.365959	0.1299770E-03	1.689997
09112011	01	0.052	0.082	0.039	0.001	0.002	0.003	0.008	0.021	0.049	0.009	0.048	290.340	0.732	0.2408717	4.369089	0.3712687E-04	2.070703
09112011	02	0.044	0.074	0.028	0.001	0.002	0.002	0.007	0.019	0.049	0.009	0.046	289.619	0.790	0.2819448	5.452590	0.4825958E-04	2.053019
09112011	03	0.039	0.068	0.021	0.001	0.002	0.002	0.007	0.017	0.050	0.008	0.044	289.220	0.813	0.3079356	5.851639	0.4948241E-04	2.072827
09112011	04	0.040	0.066	0.019	0.001	0.002	0.002	0.006	0.016	0.051	0.009	0.043	288.907	0.826	0.3571780	6.659554	0.4914709E-04	2.131947
09112011	05	0.043	0.068	0.019	0.001	0.002	0.002	0.006	0.017	0.051	0.012	0.042	288.618	0.839	0.4184681	7.059533	0.3858508E-04	2.262357
09112011	06	0.049	0.072	0.019	0.001	0.002	0.002	0.007	0.019	0.051	0.017	0.042	288.364	0.852	0.5027865	7.831933	0.2905056E-04	2.430714
09112011	07	0.053	0.079	0.018	0.002	0.002	0.003	0.007	0.021	0.052	0.023	0.042	288.188	0.863	0.5851963	9.008646	0.2307313E-04	2.591553
09112011	08	0.052	0.082	0.026	0.001	0.002	0.003	0.008	0.022	0.049	0.024	0.042	290.026	0.796	0.3574725	5.310986	0.1923621E-04	2.441056
09112011	09	0.047	0.081	0.044	0.000	0.002	0.002	0.006	0.017	0.048	0.011	0.041	293.260	0.664	NaN	5.054254	0.3591074E-03	1.148433
09112011	10	0.053	0.093	0.063	0.000	0.002	0.002	0.006	0.016	0.045	0.005	0.042	296.451	0.542	NaN	3.441457	0.6699765E-02	-0.2893173
09112011	11	0.042	0.153	0.077	0.000	0.002	0.002	0.006	0.013	0.059	0.002	0.047	299.220	0.439	NaN	2.550648	0.2955841E-01	-1.064031
09112011	12	0.023	0.124	0.066	0.000	0.001	0.001	0.005	0.010	0.066	0.001	0.048	300.587	0.394	NaN	1.959613	0.4342227E-01	-1.345542
09112011	13	0.012	0.093	0.059	0.000	0.001	0.001	0.005	0.009	0.065	0.001	0.046	302.160	0.356	NaN	1.616463	0.4730370E-01	-1.466329
09112011	14	0.006	0.079	0.052	0.000	0.001	0.001	0.005	0.009	0.065	0.000	0.043	302.978	0.340	NaN	1.383149	0.3945377E-01	-1.455220
09112011	15	0.008	0.073	0.046	0.000	0.001	0.001	0.005	0.008	0.059	0.000	0.041	302.616	0.349	NaN	1.379258	0.3507521E-01	-1.405355
09112011	16	0.012	0.073	0.042	0.000	0.001	0.001	0.005	0.008	0.056	0.000	0.041	301.805	0.369	NaN	1.493531	0.2945008E-01	-1.294872
09112011	17	0.014	0.076	0.039	0.000	0.001	0.001	0.005	0.009	0.055	0.000	0.040	300.649	0.394	NaN	1.567766	0.2127108E-01	-1.132508
09112011	18	0.019	0.076	0.035	0.000	0.001	0.001	0.005	0.009	0.055	0.000	0.041	299.326	0.425	NaN	1.901245	0.1416409E-01	-0.8721505
09112011	19	0.047	0.086	0.027	0.000	0.002	0.002	0.006	0.015	0.048	0.001	0.045	297.598	0.472	NaN	2.299239	0.1678388E-03	1.136692
09112011	20	0.066	0.091	0.027	0.000	0.002	0.003	0.008	0.020	0.046	0.001	0.049	295.881	0.535	NaN	2.876817	0.5986759E-04	1.681720
09112011	21	0.060	0.080	0.028	0.001	0.002	0.003	0.007	0.019	0.057	0.002	0.053	294.717	0.578	0.6539899E-01	2.887560	0.8736179E-04	1.519209
09112011	22	0.053	0.066	0.029	0.001	0.002	0.003	0.007	0.016	0.066	0.002	0.055	293.810	0.622	0.9096068E-01	3.743876	0.1114376E-03	1.526290
09112011	23	0.048	0.054	0.027	0.001	0.002	0.002	0.006	0.015	0.067	0.003	0.053	293.178	0.652	0.1016508	3.966242	0.1214151E-03	1.514106
09112011	24	0.046	0.047	0.024	0.001	0.002	0.002	0.006	0.015	0.060	0.003	0.049	292.424	0.705	0.1349076	4.387172	0.9358082E-04	1.670998
09122011	01	0.046	0.044	0.022	0.001	0.001	0.002	0.006	0.014	0.052	0.003	0.044	291.860	0.747	0.1574512	4.519704	0.7387596E-04	1.786607
09122011	02	0.047	0.045	0.020	0.001	0.001	0.002	0.005	0.014	0.047	0.004	0.040	291.342	0.789	0.1984605	4.760447	0.5394114E-04	1.945728
09122011	03	0.049	0.049	0.020	0.001	0.001	0.001	0.005	0.014	0.044	0.005	0.038	291.064	0.800	0.2069747	4.636049	0.4994226E-04	1.967680
09122011	04	0.057	0.057	0.023	0.001	0.001	0.001	0.006	0.016	0.042	0.007	0.038	290.838	0.805	0.2589766	4.782337	0.3392642E-04	2.149102
09122011	05	0.073	0.072	0.026	0.001	0.002	0.002	0.006	0.018	0.041	0.011	0.039	290.651	0.808	0.3497935	5.225208	0.2169965E-04	2.381651
09122011	06	0.101	0.094	0.025	0.001	0.002	0.003	0.007	0.023	0.040	0.018	0.040	290.526	0.812	0.4701775	5.333099	0.9873072E-05	2.732527
09122011	07	0.133	0.119	0.021	0.002	0.002	0.004	0.009	0.029	0.037	0.026	0.043	290.491	0.818	0.5962355	6.078971	0.5590857E-05	3.036352
09122011	08	0.105	0.115	0.028	0.012	0.002	0.005	0.010	0.033	0.053	0.030	0.049	292.634	0.796	0.4288326	5.815141	0.6578956E-05	2.946403
09122011	09	0.052	0.077	0.051	0.005	0.002	0.004	0.008	0.026	0.058	0.015	0.054	295.010	0.747	0.1261708	4.690819	0.4299413E-04	2.037840
09122011	10	0.005	0.058	0.069	0.001	0.001	0.002	0.005	0.012	0.083	0.003	0.060	296.352	0.697	0.1402497E-03	6.140601	0.4842077E-02	0.1031792
09122011	11	0.001	0.053	0.078	0.000	0.001	0.001	0.003	0.007	0.082	0.001	0.064	297.664	0.642	0.6330013E-03	4.742754	0.1207588E-01	-0.4058882
09122011	12	0.001	0.064	0.097	0.000	0.001	0.001	0.003	0.005	0.078	0.001	0.065	298.975	0.596	0.2457500E-03	4.345224	0.9378747E-02	-0.3341326
09122011	13	0.001	0.089	0.113	0.000	0.001	0.001	0.003	0.005	0.069	0.000	0.065	301.343	0.497	0.6347895E-04	3.108944	0.2361736E-02	0.1193815
09122011	14	0.000	0.077	0.087	0.000	0.001	0.001	0.003	0.005	0.050	0.000	0.053	303.191	0.445	0.2086163E-04	2.111680	0.1041593E-02	0.3069300
09122011	15	0.000	0.056	0.070	0.000	0.001	0.001	0.002	0.004	0.043	0.000	0.047	302.753	0.442	0.1233816E-04	1.853022	0.7659476E-03	0.3836815
09122011	16	0.000	0.046	0.062	0.000	0.001	0.001	0.002	0.004	0.040	0.000	0.045	302.107	0.454	0.1168251E-04	1.845994	0.7296805E-03	0.4030976
09122011	17	0.000	0.040	0.057	0.000	0.000	0.001	0.002	0.004	0.037	0.000	0.043	301.081	0.472	0.8583069E-05	1.884993	0.7002640E-03	0.4300479
09122011	18	0.001	0.033	0.050	0.000	0.000	0.001	0.002	0.005	0.041	0.000	0.041	299.956	0.500	0.4523993E-04	1.872900	0.1653984E-02	0.5398327E-01
09122011	19	0.033	0.043	0.053	0.000	0.001	0.002	0.004	0.013	0.052	0.001	0.043	298.303	0.537	NaN	3.117366	0.1543856E-01	-0.6948192
09122011	20	0.086	0.060	0.064	0.000	0.001	0.002	0.005	0.021	0.039	0.002	0.045	296.617	0.589	NaN	4.261776	0.8385879E-04	1.706042
09122011	21	0.096	0.063	0.064	0.000	0.001	0.002	0.006	0.022	0.041	0.004	0.045	295.326	0.635	NaN	5.139260	0.5086086E-04	2.004517
09122011	22	0.094	0.059	0.058	0.000	0.001	0.002	0.006	0.020	0.043	0.006	0.044	294.311	0.676	NaN	5.947262	0.5381771E-04	2.043392
09122011	23	0.085	0.049	0.052	0.000	0.001	0.002	0.005	0.018	0.044	0.006	0.041	293.462	0.717	NaN	6.559091	0.5713063E-04	2.059975
09122011	24	0.074	0.040	0.047	0.001	0.001	0.002	0.005	0.016	0.041	0.007	0.037	292.723	0.761	0.1861297	3.889537	0.2718472E-04	2.155573
09132011	01	0.061	0.032	0.045	0.001	0.001	0.001	0.004	0.014	0.037	0.008	0.033	292.032	0.810	0.2035004	4.581450	0.3297054E-04	2.142877
09132011	02	0.050	0.027	0.042	0.001	0.001	0.001	0.004	0.013	0.034	0.009	0.029	291.508	0.843	0.2193949	4.877675	0.2955416E-04	2.217594
09132011	03	0.043	0.024	0.039	0.001	0.001	0.001	0.004	0.012	0.030	0.008	0.026	291.132	0.860	0.2247678	5.021480	0.2800616E-04	2.253578
09132011	04	0.043	0.023	0.034	0.001	0.001	0.001	0.003	0.012	0.025	0.007	0.023	290.971	0.856	0.2023903	3.958169	0.2005051E-04	2.295369
09132011	05	0.051	0.026	0.028	0.001	0.001	0.001	0.004	0.013	0.020	0.007	0.022	290.699	0.868	0.2526661	3.857895	0.1222797E-04	2.498996
09132011	06	0.065	0.031	0.021	0.001	0.001	0.002	0.004	0.015	0.015	0.009	0.022	290.456	0.879	0.3578158	4.052408	0.6628126E-05	2.786322
09132011	07	0.075	0.036	0.016	0.001	0.001	0.003	0.005	0.018	0.011	0.011	0.023	290.251	0.889	0.4516819	4.186529	0.4224279E-05	2.996102
09132011	08	0.063	0.035	0.025	0.001	0.001	0.003	0.005	0.020	0.009	0.009	0.023	292.245	0.823	0.1023716	0.9342861	0.1034855E-05	2.955600
09132011	09	0.032	0.033	0.040	0.000	0.001	0.002	0.004	0.013	0.018	0.003	0.025	295.277	0.709	NaN	3.597182	0.5043455E-02	-0.1467658
09132011	10	0.015	0.052	0.056	0.000	0.001	0.001	0.003	0.009	0.034	0.001	0.028	298.065	0.598	NaN	2.249167	0.3785948E-01	-1.226153
09132011	11	0.002	0.117	0.077	0.000	0.001	0.001	0.002	0.006	0.047	0.000	0.036	299.999	0.526	0.6222129E-03	1.943717	0.5597183E-02	-0.4593364
09132011	12	0.001	0.115	0.086	0.000	0.001	0.001	0.002	0.005	0.045	0.000	0.042	301.566	0.474	0.4190207E-04	1.717730	0.2391643E-02	-0.1437414
09132011	13	0.000	0.087	0.085	0.000	0.000	0.001	0.002	0.004	0.042	0.000	0.045	303.178	0.427	0.1096725E-04	1.673656	0.7050110E-03	0.3754702
09132011	14	0.000	0.060	0.075	0.000	0.000	0.000	0.002	0.004	0.040	0.000	0.046	303.913	0.403	0.4768372E-06	1.515911	0.5773389E-03	0.4192429
09132011	15	0.000	0.045	0.071	0.000	0.000	0.000	0.002	0.004	0.041	0.000	0.048	303.254	0.401	0.2384186E-06	1.659062	0.1276187E-02	0.1139484
09132011	16	0.000	0.044	0.074	0.000	0.000	0.001	0.002	0.004	0.047	0.000	0.049	301.966	0.420	0.1156330E-04	1.756715	0.6989415E-03	0.4002604
09132011	17	0.001	0.042	0.074	0.000	0.000	0.001	0.002	0.005	0.054	0.000	0.048	301.577	0.436	0.3314018E-04	1.746272	0.2304654E-02	-0.1204937
09132011	18	0.002	0.043	0.067	0.000	0.000	0.001	0.002	0.006	0.063	0.000	0.048	300.518	0.454	0.1186132E-03	1.880046	0.1179738E-01	-0.7976172
09132011	19	0.044	0.064	0.067	0.000	0.001	0.002	0.004	0.017	0.061	0.001	0.051	298.656	0.485	NaN	3.118986	0.1743714E-01	-0.7474619
09132011	20	0.084	0.076	0.070	0.000	0.001	0.002	0.006	0.024	0.049	0.002	0.052	296.887	0.536	NaN	3.941976	0.1128874E-03	1.543069
09132011	21	0.085	0.070	0.060	0.000	0.001	0.002	0.006	0.023	0.047	0.003	0.050	295.593	0.585	NaN	4.390083	0.7381457E-04	1.774331
09132011	22	0.076	0.058	0.046	0.000	0.001	0.002	0.005	0.019	0.049	0.003	0.046	294.511	0.636	NaN	4.735504	0.6973923E-04	1.831889
09132011	23	0.067	0.046	0.034	0.000	0.001	0.001	0.004	0.015	0.051	0.003	0.043	293.696	0.677	NaN	4.965681	0.8635690E-04	1.759682
09132011	24	0.057	0.037	0.025	0.001	0.001	0.001	0.004	0.012	0.052	0.003	0.040	292.987	0.719	0.1222254	3.729544	0.7215524E-04	1.713388
09142011	01	0.046	0.030	0.019	0.001	0.001	0.001	0.003	0.010	0.054	0.002	0.038	292.340	0.764	0.1389334	4.306969	0.8225952E-04	1.718986
09142011	02	0.034	0.025	0.015	0.001	0.001	0.001	0.003	0.009	0.054	0.002	0.037	291.962	0.786	0.1341151	4.818609	0.1016744E-03	1.675710
09142011	03	0.027	0.024	0.013	0.001	0.001	0.001	0.003	0.008	0.054	0.002	0.037	291.608	0.800	0.1218370	5.161107	0.1339667E-03	1.585746
09142011	04	0.028	0.025	0.012	0.001	0.001	0.001	0.003	0.009	0.052	0.002	0.037	291.386	0.808	0.1348873	5.239993	0.1195782E-03	1.641679
09142011	05	0.036	0.030	0.011	0.001	0.001	0.001	0.004	0.011	0.047	0.002	0.037	291.110	0.821	0.1768677	5.176699	0.7878239E-04	1.817624
09142011	06	0.056	0.039	0.009	0.001	0.001	0.002	0.005	0.014	0.039	0.003	0.037	290.859	0.829	0.2705362	5.020855	0.3543970E-04	2.151288
09142011	07	0.080	0.050	0.008	0.001	0.001	0.003	0.006	0.019	0.030	0.004	0.038	290.879	0.821	0.3235483	4.127564	0.1518197E-04	2.434366
09142011	08	0.077	0.056	0.018	0.001	0.002	0.004	0.007	0.023	0.024	0.006	0.039	293.144	0.751	0.1686025	2.709308	0.9723421E-05	2.445039
09142011	09	0.046	0.049	0.039	0.000	0.001	0.003	0.006	0.018	0.033	0.004	0.039	296.247	0.637	NaN	3.932895	0.2209580E-03	1.250403
09142011	10	0.025	0.042	0.064	0.000	0.001	0.002	0.004	0.013	0.045	0.001	0.039	298.931	0.534	NaN	2.557379	0.3464542E-01	-1.131851
09142011	11	0.020	0.031	0.085	0.000	0.001	0.001	0.003	0.009	0.049	0.001	0.036	301.592	0.438	NaN	1.791537	0.6362983E-01	-1.550435
09142011	12	0.032	0.026	0.099	0.000	0.001	0.001	0.002	0.006	0.051	0.001	0.033	303.300	0.381	NaN	1.590407	0.6500383E-01	-1.611431
09142011	13	0.034	0.034	0.121	0.000	0.001	0.001	0.002	0.006	0.052	0.000	0.034	304.915	0.337	NaN	1.390448	0.8586226E-01	-1.790648
09142011	14	0.021	0.038	0.122	0.000	0.001	0.001	0.002	0.006	0.054	0.000	0.034	305.777	0.314	NaN	1.147630	0.9799001E-01	-1.931380
09142011	15	0.012	0.040	0.102	0.000	0.001	0.001	0.002	0.005	0.053	0.000	0.033	305.315	0.319	NaN	1.130162	0.8798063E-01	-1.891246
09142011	16	0.008	0.045	0.088	0.000	0.001	0.001	0.002	0.005	0.053	0.000	0.034	304.271	0.341	NaN	1.215276	0.7993919E-01	-1.818085
09142011	17	0.006	0.057	0.089	0.000	0.001	0.001	0.002	0.006	0.059	0.000	0.039	302.840	0.372	0.5159497E-02	1.794217	0.6133268E-02	-0.5338170
09142011	18	0.005	0.072	0.083	0.000	0.001	0.001	0.003	0.008	0.069	0.000	0.047	301.203	0.409	0.6975472E-02	2.121204	0.5846617E-02	-0.4403221
09142011	19	0.040	0.110	0.071	0.000	0.001	0.002	0.005	0.017	0.067	0.001	0.054	299.040	0.456	NaN	2.890311	0.2415487E-01	-0.9220601
09142011	20	0.066	0.156	0.094	0.000	0.001	0.003	0.007	0.025	0.066	0.002	0.063	297.259	0.511	NaN	4.160550	0.1963358E-01	-0.6738488
09142011	21	0.060	0.198	0.120	0.000	0.001	0.003	0.007	0.027	0.080	0.004	0.071	295.984	0.562	NaN	5.349537	0.5146500E-01	-0.9831958
09142011	22	0.048	0.237	0.142	0.000	0.001	0.003	0.007	0.027	0.096	0.007	0.078	295.051	0.605	NaN	6.645864	0.8709168E-01	-1.117425
09142011	23	0.037	0.265	0.163	0.000	0.001	0.003	0.007	0.026	0.108	0.009	0.082	294.282	0.646	NaN	7.747967	0.1198267	-1.189366
09142011	24	0.027	0.283	0.189	0.000	0.001	0.003	0.007	0.025	0.117	0.012	0.084	293.620	0.687	NaN	8.913882	0.1565471	-1.244578
09152011	01	0.020	0.293	0.223	0.000	0.001	0.002	0.006	0.024	0.124	0.015	0.084	293.006	0.733	NaN	10.12674	0.1994711	-1.294410
09152011	02	0.014	0.298	0.260	0.000	0.001	0.002	0.006	0.023	0.130	0.019	0.085	292.577	0.766	NaN	11.94485	0.2445873	-1.311253
09152011	03	0.012	0.301	0.285	0.000	0.001	0.002	0.006	0.022	0.135	0.022	0.084	292.383	0.778	NaN	12.76005	0.2697752	-1.325150
09152011	04	0.013	0.301	0.287	0.000	0.001	0.002	0.006	0.023	0.140	0.028	0.084	292.281	0.786	NaN	13.96195	0.2689475	-1.284721
09152011	05	0.018	0.298	0.262	0.000	0.001	0.002	0.007	0.024	0.150	0.042	0.084	292.252	0.791	NaN	15.46455	0.2375170	-1.186357
09152011	06	0.028	0.296	0.214	0.001	0.002	0.003	0.008	0.029	0.163	0.065	0.085	292.286	0.792	0.2588583	15.95793	0.2429067E-03	1.817537
09152011	07	0.042	0.305	0.166	0.001	0.002	0.005	0.009	0.034	0.170	0.086	0.085	292.382	0.793	0.3771051	17.37821	0.1353666E-03	2.108493
09152011	08	0.041	0.268	0.156	0.004	0.002	0.005	0.010	0.037	0.164	0.074	0.090	294.693	0.785	0.3024427	15.36213	0.1163994E-03	2.120501
09152011	09	0.033	0.163	0.154	0.004	0.002	0.005	0.009	0.033	0.146	0.036	0.096	296.567	0.740	0.1350282	10.43074	0.1949392E-03	1.728416
09152011	10	0.005	0.073	0.129	0.001	0.001	0.003	0.005	0.017	0.137	0.005	0.095	297.310	0.748	0.000000	10.93629	0.6722343E-02	0.2113494
09152011	11	0.002	0.058	0.111	0.000	0.001	0.002	0.004	0.010	0.121	0.002	0.091	298.388	0.726	0.3156900E-02	9.716446	0.1242078E-01	-0.1066416
09152011	12	0.001	0.118	0.115	0.000	0.001	0.001	0.003	0.007	0.096	0.001	0.093	299.984	0.667	0.3872514E-03	8.366184	0.6605140E-02	0.1026454
09152011	13	0.000	0.107	0.112	0.000	0.001	0.001	0.003	0.008	0.087	0.001	0.106	300.432	0.650	0.8350611E-04	9.679668	0.1093824E-01	-0.5308715E-01
09152011	14	0.000	0.081	0.094	0.000	0.001	0.001	0.003	0.008	0.092	0.001	0.113	301.384	0.606	0.3933907E-04	9.124631	0.1116503E-01	-0.8764452E-01
09152011	15	0.000	0.070	0.068	0.000	0.001	0.001	0.003	0.008	0.089	0.001	0.104	300.154	0.611	0.5805492E-04	7.919593	0.6631958E-02	0.7706116E-01
09152011	16	0.001	0.056	0.049	0.001	0.001	0.001	0.003	0.008	0.085	0.001	0.088	299.434	0.621	0.000000	6.525184	0.4340947E-02	0.1770082
09152011	17	0.001	0.048	0.037	0.001	0.001	0.001	0.003	0.007	0.077	0.000	0.073	297.256	0.663	0.000000	6.120499	0.6357207E-02	-0.1647956E-01
09152011	18	0.001	0.045	0.025	0.001	0.001	0.001	0.003	0.008	0.079	0.000	0.069	295.616	0.693	0.000000	6.188143	0.1156364E-01	-0.2715344
09152011	19	0.001	0.037	0.018	0.001	0.002	0.001	0.003	0.009	0.081	0.000	0.070	294.168	0.720	0.000000	6.934222	0.1368635E-01	-0.2952899
09152011	20	0.001	0.031	0.017	0.001	0.002	0.001	0.003	0.008	0.080	0.000	0.069	293.146	0.739	0.000000	7.560483	0.1383883E-01	-0.2625497
09152011	21	0.001	0.031	0.016	0.001	0.002	0.001	0.003	0.007	0.077	0.000	0.064	292.324	0.755	0.000000	7.639381	0.1273909E-01	-0.2220801
09152011	22	0.001	0.032	0.016	0.001	0.002	0.001	0.003	0.006	0.072	0.000	0.056	291.568	0.769	0.000000	7.053458	0.1002683E-01	-0.1527616
09152011	23	0.001	0.036	0.018	0.001	0.002	0.001	0.002	0.005	0.068	0.000	0.049	290.398	0.798	0.000000	7.270264	0.7133324E-02	0.8258220E-02
09152011	24	0.002	0.038	0.017	0.001	0.002	0.001	0.002	0.005	0.066	0.000	0.046	289.554	0.818	0.000000	7.590614	0.5154409E-02	0.1680981
09162011	01	0.002	0.039	0.017	0.001	0.002	0.001	0.002	0.005	0.065	0.000	0.043	288.832	0.834	0.000000	7.536926	0.3464024E-02	0.3376134
09162011	02	0.002	0.039	0.017	0.001	0.002	0.001	0.002	0.005	0.063	0.000	0.041	288.469	0.839	0.000000	7.605663	0.2839781E-02	0.4278522
09162011	03	0.005	0.038	0.014	0.001	0.002	0.001	0.002	0.006	0.063	0.001	0.040	288.595	0.829	0.1734376E-02	9.206370	0.3035170E-02	0.4819054
09162011	04	0.021	0.040	0.009	0.001	0.002	0.001	0.003	0.009	0.056	0.002	0.039	288.888	0.813	0.1924552	5.641497	0.1317399E-03	1.631677
09162011	05	0.049	0.049	0.008	0.001	0.002	0.001	0.004	0.014	0.048	0.004	0.040	289.238	0.794	0.2885670	4.624198	0.4884015E-04	1.976259
09162011	06	0.083	0.061	0.007	0.001	0.002	0.003	0.006	0.019	0.039	0.005	0.043	289.595	0.773	0.3742613	4.126444	0.2014791E-04	2.311346
09162011	07	0.100	0.071	0.008	0.001	0.002	0.004	0.007	0.024	0.030	0.005	0.045	289.945	0.753	0.3724563	3.477188	0.1142355E-04	2.483427
09162011	08	0.075	0.066	0.015	0.002	0.002	0.004	0.007	0.024	0.031	0.005	0.044	291.822	0.687	0.1785792	2.646620	0.1557089E-04	2.230378
09162011	09	0.032	0.049	0.034	0.001	0.002	0.002	0.004	0.011	0.052	0.003	0.040	293.218	0.640	0.5609995E-01	2.969948	0.1298351E-03	1.359357
09162011	10	0.008	0.044	0.054	0.000	0.001	0.001	0.002	0.005	0.068	0.001	0.041	294.331	0.609	NaN	3.551679	0.4332888E-01	-1.086344
09162011	11	0.004	0.042	0.066	0.000	0.001	0.001	0.002	0.004	0.074	0.000	0.043	295.268	0.582	NaN	3.354657	0.5906777E-01	-1.245703
09162011	12	0.004	0.042	0.076	0.000	0.001	0.001	0.002	0.005	0.079	0.000	0.047	295.945	0.556	0.1726454E-01	3.856563	0.5355845E-02	-0.1426276
09162011	13	0.002	0.045	0.080	0.000	0.001	0.001	0.002	0.005	0.084	0.000	0.054	296.336	0.533	0.2334714E-02	3.243855	0.7380144E-02	-0.3570035
09162011	14	0.002	0.049	0.078	0.000	0.001	0.001	0.003	0.005	0.088	0.000	0.057	296.280	0.519	0.2077937E-02	3.297448	0.7994665E-02	-0.3846223
09162011	15	0.003	0.048	0.075	0.000	0.001	0.001	0.003	0.006	0.092	0.000	0.057	295.046	0.524	0.1270247E-01	3.454444	0.5252627E-02	-0.1819984
09162011	16	0.005	0.043	0.068	0.000	0.001	0.001	0.003	0.007	0.097	0.000	0.058	293.911	0.535	0.2500844E-01	4.557600	0.5575481E-02	-0.8754617E-01
09162011	17	0.020	0.044	0.051	0.000	0.001	0.001	0.003	0.008	0.090	0.002	0.055	293.099	0.540	NaN	3.986673	0.2788130E-01	-0.8447025
09162011	18	0.037	0.046	0.036	0.000	0.001	0.001	0.004	0.010	0.083	0.002	0.053	292.553	0.544	NaN	4.069054	0.9558085E-03	0.6291226
09162011	19	0.044	0.047	0.029	0.001	0.001	0.001	0.004	0.010	0.080	0.003	0.052	291.629	0.546	0.9867591E-01	3.191777	0.1637292E-03	1.289906
09162011	20	0.047	0.045	0.025	0.001	0.001	0.001	0.004	0.010	0.079	0.003	0.051	291.058	0.550	0.1187679	3.123440	0.1381077E-03	1.354415
09162011	21	0.046	0.042	0.021	0.001	0.001	0.001	0.003	0.009	0.080	0.003	0.050	290.527	0.559	0.1360247	3.238140	0.1364567E-03	1.375301
09162011	22	0.043	0.039	0.019	0.001	0.001	0.001	0.003	0.008	0.079	0.002	0.050	290.045	0.569	0.1415035	3.404225	0.1528113E-03	1.347863
09162011	23	0.036	0.037	0.017	0.001	0.001	0.001	0.003	0.007	0.079	0.002	0.049	289.570	0.579	0.1383594	3.493977	0.1742622E-03	1.302117
09162011	24	0.030	0.035	0.016	0.001	0.001	0.001	0.003	0.007	0.081	0.002	0.049	289.078	0.589	0.1428431	3.595954	0.1863727E-03	1.285432
09172011	01	0.024	0.034	0.016	0.001	0.001	0.001	0.003	0.006	0.081	0.002	0.049	288.542	0.599	0.1307012	3.778566	0.2425003E-03	1.192615
09172011	02	0.021	0.033	0.016	0.001	0.001	0.001	0.003	0.006	0.082	0.002	0.049	288.125	0.609	0.1360322	3.897481	0.2534942E-03	1.186816
09172011	03	0.018	0.033	0.017	0.001	0.001	0.001	0.003	0.006	0.081	0.002	0.049	287.872	0.619	0.1238326	4.010473	0.3014190E-03	1.124025
09172011	04	0.018	0.033	0.019	0.001	0.001	0.001	0.003	0.007	0.081	0.003	0.049	287.699	0.627	0.1395642	4.070579	0.2625198E-03	1.190494
09172011	05	0.019	0.034	0.021	0.001	0.001	0.001	0.003	0.007	0.081	0.003	0.049	287.522	0.635	0.1531686	4.222054	0.2476842E-03	1.231626
09172011	06	0.021	0.035	0.026	0.001	0.001	0.001	0.004	0.007	0.081	0.005	0.049	287.430	0.641	0.1689840	4.271849	0.2162706E-03	1.295618
09172011	07	0.028	0.037	0.026	0.001	0.001	0.001	0.004	0.009	0.080	0.006	0.049	287.388	0.644	0.2212425	4.162329	0.1390069E-03	1.476300
09172011	08	0.032	0.038	0.029	0.001	0.001	0.001	0.004	0.009	0.077	0.007	0.048	288.601	0.632	0.1810088	3.917353	0.1368067E-03	1.456885
09172011	09	0.022	0.034	0.043	0.000	0.001	0.001	0.004	0.008	0.079	0.005	0.048	290.629	0.604	NaN	4.411609	0.1689177E-01	-0.5830781
09172011	10	0.020	0.033	0.054	0.000	0.001	0.001	0.004	0.007	0.079	0.004	0.048	292.830	0.567	NaN	3.953385	0.3070354E-01	-0.8902193
09172011	11	0.019	0.035	0.065	0.000	0.001	0.001	0.004	0.007	0.081	0.003	0.050	294.755	0.539	NaN	3.651084	0.4399337E-01	-1.080965
09172011	12	0.005	0.047	0.085	0.000	0.001	0.001	0.004	0.007	0.095	0.001	0.058	296.250	0.518	0.1761901E-01	4.145889	0.5994657E-02	-0.1601466
09172011	13	0.005	0.045	0.097	0.000	0.001	0.001	0.004	0.007	0.100	0.000	0.060	297.438	0.502	0.1549631E-01	4.169039	0.6518401E-02	-0.1941051
09172011	14	0.008	0.040	0.097	0.000	0.001	0.001	0.003	0.007	0.100	0.001	0.060	298.010	0.491	NaN	3.487679	0.8809645E-01	-1.402422
09172011	15	0.015	0.036	0.092	0.000	0.001	0.001	0.004	0.008	0.097	0.001	0.059	297.850	0.492	NaN	3.527184	0.7338087E-01	-1.318155
09172011	16	0.023	0.034	0.086	0.000	0.001	0.001	0.004	0.008	0.094	0.002	0.058	297.400	0.499	NaN	3.727540	0.6047655E-01	-1.210165
09172011	17	0.033	0.031	0.074	0.000	0.001	0.001	0.004	0.008	0.092	0.002	0.057	296.627	0.508	NaN	4.012031	0.3759317E-01	-0.9717447
09172011	18	0.046	0.030	0.058	0.000	0.001	0.001	0.004	0.009	0.088	0.003	0.056	295.716	0.514	NaN	4.171227	0.1086116E-01	-0.4156123
09172011	19	0.068	0.034	0.038	0.000	0.001	0.002	0.005	0.012	0.079	0.003	0.054	294.741	0.523	NaN	3.874319	0.1337059E-03	1.462045
09172011	20	0.092	0.042	0.028	0.000	0.002	0.003	0.006	0.017	0.063	0.003	0.053	293.864	0.547	NaN	3.626807	0.5074779E-04	1.854107
09172011	21	0.090	0.039	0.023	0.001	0.002	0.003	0.006	0.018	0.055	0.003	0.050	293.198	0.571	0.1234020	2.709149	0.4839759E-04	1.748009
09172011	22	0.076	0.033	0.017	0.001	0.002	0.003	0.006	0.016	0.054	0.003	0.048	292.609	0.598	0.1325238	2.941557	0.5420042E-04	1.734575
09172011	23	0.055	0.028	0.013	0.002	0.001	0.002	0.005	0.013	0.057	0.002	0.046	291.981	0.632	0.1186332	3.213187	0.8749406E-04	1.564957
09172011	24	0.036	0.025	0.011	0.002	0.001	0.002	0.005	0.011	0.062	0.002	0.046	291.372	0.668	0.1145909	3.835607	0.1290597E-03	1.473044
09182011	01	0.020	0.021	0.012	0.002	0.001	0.001	0.004	0.008	0.068	0.002	0.046	290.728	0.708	0.8428502E-01	4.652862	0.2902660E-03	1.204924
09182011	02	0.009	0.018	0.014	0.002	0.001	0.001	0.004	0.007	0.076	0.001	0.048	290.100	0.744	0.6562263E-01	5.536911	0.5374479E-03	1.012931
09182011	03	0.002	0.015	0.017	0.002	0.001	0.001	0.003	0.006	0.081	0.001	0.053	289.650	0.768	0.000000	6.982402	0.4673399E-02	0.1743720
09182011	04	0.002	0.014	0.019	0.001	0.001	0.001	0.003	0.006	0.084	0.001	0.056	289.324	0.785	0.000000	8.022722	0.5721364E-02	0.1468222
09182011	05	0.002	0.015	0.021	0.001	0.001	0.001	0.003	0.006	0.087	0.001	0.056	289.059	0.797	0.000000	8.477821	0.4607983E-02	0.2647734
09182011	06	0.003	0.017	0.023	0.001	0.001	0.001	0.004	0.007	0.090	0.001	0.056	288.835	0.808	0.1398802E-02	9.547092	0.3293052E-02	0.4622725
09182011	07	0.007	0.020	0.023	0.001	0.001	0.001	0.004	0.008	0.092	0.003	0.056	288.640	0.817	0.1268328	9.330487	0.6118953E-03	1.183227
09182011	08	0.012	0.021	0.024	0.001	0.001	0.001	0.004	0.009	0.087	0.005	0.055	289.666	0.795	0.1231867	8.179748	0.4583628E-03	1.251531
09182011	09	0.003	0.017	0.040	0.001	0.001	0.001	0.004	0.008	0.075	0.001	0.050	291.463	0.742	0.3614426E-03	5.933475	0.3413117E-02	0.2401579
09182011	10	0.002	0.014	0.046	0.000	0.001	0.001	0.003	0.006	0.066	0.001	0.046	293.231	0.685	0.6457269E-02	4.371702	0.5535071E-02	-0.1024726
09182011	11	0.002	0.014	0.049	0.000	0.001	0.001	0.003	0.006	0.066	0.001	0.046	294.807	0.639	0.4087687E-02	3.698359	0.5775277E-02	-0.1935637
09182011	12	0.002	0.014	0.055	0.000	0.001	0.001	0.003	0.006	0.068	0.001	0.046	296.012	0.602	0.4729271E-02	3.321305	0.5365383E-02	-0.2082920
09182011	13	0.004	0.014	0.062	0.000	0.001	0.001	0.003	0.007	0.071	0.000	0.046	296.944	0.573	0.1631701E-01	3.554131	0.5160910E-02	-0.1619928
09182011	14	0.005	0.014	0.065	0.000	0.001	0.001	0.003	0.007	0.076	0.000	0.047	297.419	0.556	0.1801908E-01	4.140071	0.5861009E-02	-0.1509646
09182011	15	0.004	0.014	0.062	0.000	0.001	0.001	0.003	0.007	0.077	0.000	0.050	297.351	0.554	0.1505238E-01	3.354183	0.5209259E-02	-0.1911892
09182011	16	0.005	0.014	0.056	0.000	0.001	0.001	0.003	0.008	0.079	0.000	0.050	296.930	0.562	0.2021545E-01	4.140071	0.5695560E-02	-0.1385287
09182011	17	0.017	0.014	0.046	0.000	0.001	0.001	0.003	0.008	0.073	0.001	0.047	296.184	0.574	NaN	3.630678	0.2500441E-01	-0.8380290
09182011	18	0.030	0.014	0.034	0.000	0.001	0.001	0.003	0.008	0.067	0.001	0.044	295.254	0.585	NaN	4.017321	0.3400146E-02	0.7243896E-01
09182011	19	0.045	0.018	0.021	0.000	0.001	0.002	0.004	0.010	0.058	0.001	0.042	294.343	0.598	NaN	3.575901	0.1454111E-03	1.390788
09182011	20	0.057	0.022	0.013	0.001	0.001	0.002	0.005	0.013	0.046	0.001	0.040	293.682	0.616	0.7008946E-01	2.539649	0.7267590E-04	1.543383
09182011	21	0.054	0.020	0.011	0.001	0.001	0.002	0.005	0.013	0.039	0.001	0.037	293.122	0.632	0.7029271E-01	2.332075	0.6184725E-04	1.576422
09182011	22	0.046	0.018	0.009	0.001	0.001	0.002	0.004	0.012	0.036	0.001	0.034	292.596	0.649	0.6863862E-01	2.292249	0.6306369E-04	1.560482
09182011	23	0.039	0.017	0.008	0.002	0.001	0.002	0.004	0.011	0.033	0.001	0.032	292.105	0.665	0.6688547E-01	2.330567	0.6664217E-04	1.543712
09182011	24	0.032	0.017	0.008	0.002	0.001	0.001	0.004	0.011	0.029	0.001	0.030	291.622	0.679	0.5275673E-01	2.114491	0.8209909E-04	1.410868
09192011	01	0.027	0.016	0.009	0.002	0.001	0.001	0.004	0.010	0.028	0.001	0.027	291.120	0.696	0.5486202E-01	2.032771	0.6995984E-04	1.463240
09192011	02	0.024	0.016	0.010	0.002	0.001	0.001	0.004	0.010	0.027	0.001	0.026	290.749	0.708	0.5520165E-01	1.986102	0.6590802E-04	1.479063
09192011	03	0.024	0.018	0.011	0.001	0.001	0.001	0.004	0.010	0.026	0.001	0.026	290.531	0.716	0.5829525E-01	2.061046	0.6664659E-04	1.490310
09192011	04	0.029	0.022	0.013	0.001	0.001	0.001	0.004	0.011	0.023	0.002	0.025	290.402	0.719	0.6684077E-01	1.833247	0.4278919E-04	1.631887
09192011	05	0.040	0.029	0.014	0.001	0.001	0.001	0.004	0.013	0.019	0.002	0.025	290.301	0.722	0.8247310E-01	1.606009	0.2380370E-04	1.829104
09192011	06	0.058	0.038	0.013	0.001	0.001	0.002	0.005	0.016	0.011	0.003	0.025	290.258	0.721	0.1218544	1.324413	0.5520272E-05	2.380063
09192011	07	0.069	0.046	0.012	0.002	0.002	0.003	0.006	0.019	0.005	0.004	0.025	290.217	0.721	0.2063934	1.059206	0.8056709E-06	3.118823
09192011	08	0.062	0.047	0.018	0.002	0.002	0.003	0.006	0.019	0.005	0.005	0.025	291.416	0.698	0.1398177	0.9721171	0.9184952E-06	3.024642
09192011	09	0.040	0.042	0.034	0.001	0.001	0.002	0.005	0.012	0.017	0.004	0.024	292.945	0.670	0.4267651E-01	1.414213	0.2032431E-04	1.842499
09192011	10	0.020	0.041	0.046	0.000	0.001	0.001	0.003	0.007	0.031	0.002	0.025	294.344	0.636	NaN	2.654214	0.2429903E-01	-0.9616531
09192011	11	0.014	0.039	0.054	0.000	0.001	0.001	0.003	0.007	0.035	0.001	0.027	295.741	0.599	NaN	2.264364	0.3831667E-01	-1.228441
09192011	12	0.012	0.034	0.062	0.000	0.001	0.001	0.003	0.006	0.038	0.001	0.028	296.712	0.574	NaN	2.114702	0.4985705E-01	-1.372477
09192011	13	0.013	0.028	0.066	0.000	0.001	0.001	0.003	0.006	0.039	0.001	0.028	297.483	0.554	NaN	2.038321	0.5181551E-01	-1.405187
09192011	14	0.013	0.026	0.064	0.000	0.001	0.001	0.003	0.006	0.042	0.001	0.029	297.876	0.543	NaN	2.071507	0.4860657E-01	-1.370409
09192011	15	0.010	0.028	0.063	0.000	0.001	0.001	0.003	0.006	0.046	0.001	0.032	297.667	0.547	NaN	2.223059	0.5260467E-01	-1.374073
09192011	16	0.010	0.034	0.061	0.000	0.001	0.001	0.003	0.007	0.050	0.001	0.034	297.188	0.556	NaN	2.428889	0.4812044E-01	-1.296922
09192011	17	0.012	0.037	0.054	0.000	0.001	0.001	0.003	0.007	0.052	0.001	0.036	296.343	0.569	NaN	2.664082	0.4077074E-01	-1.184801
09192011	18	0.020	0.034	0.040	0.000	0.001	0.001	0.003	0.008	0.053	0.001	0.037	295.323	0.582	NaN	3.035352	0.1670187E-01	-0.7405561
09192011	19	0.044	0.031	0.022	0.001	0.001	0.001	0.004	0.010	0.042	0.001	0.034	294.424	0.595	0.3636491E-01	2.080635	0.1032937E-03	1.304122
09192011	20	0.068	0.034	0.014	0.001	0.001	0.002	0.005	0.015	0.025	0.001	0.032	293.786	0.614	0.5340981E-01	1.576810	0.2922582E-04	1.732013
09192011	21	0.068	0.033	0.013	0.001	0.001	0.002	0.005	0.017	0.018	0.001	0.030	293.267	0.633	0.5556262E-01	1.302642	0.1570774E-04	1.918711
09192011	22	0.060	0.031	0.013	0.001	0.001	0.002	0.005	0.016	0.016	0.001	0.029	292.852	0.650	0.5724341E-01	1.388449	0.1753702E-04	1.898574
09192011	23	0.051	0.029	0.013	0.001	0.001	0.002	0.005	0.016	0.017	0.002	0.028	292.489	0.665	0.5867368E-01	1.378981	0.1558256E-04	1.946920
09192011	24	0.041	0.027	0.014	0.001	0.001	0.002	0.005	0.015	0.018	0.002	0.028	292.092	0.683	0.5604702E-01	1.533705	0.2271101E-04	1.829505
09202011	01	0.032	0.025	0.015	0.001	0.001	0.002	0.005	0.014	0.021	0.002	0.029	291.667	0.702	0.5652916E-01	1.873373	0.3812638E-04	1.691399
09202011	02	0.026	0.024	0.018	0.001	0.001	0.002	0.005	0.014	0.023	0.002	0.029	291.477	0.714	0.5425715E-01	1.943247	0.4258454E-04	1.659276
09202011	03	0.025	0.024	0.020	0.001	0.001	0.002	0.005	0.014	0.026	0.002	0.030	291.290	0.739	0.6715524E-01	2.317591	0.4635392E-04	1.698950
09202011	04	0.029	0.027	0.021	0.001	0.001	0.002	0.006	0.015	0.026	0.003	0.031	291.103	0.765	0.9543854E-01	2.650142	0.3501952E-04	1.878959
09202011	05	0.039	0.033	0.021	0.001	0.001	0.002	0.006	0.017	0.023	0.004	0.032	290.927	0.789	0.1329892	2.816065	0.2385040E-04	2.072147
09202011	06	0.057	0.043	0.018	0.001	0.002	0.003	0.007	0.021	0.017	0.006	0.033	290.786	0.813	0.2416225	2.876467	0.7245442E-05	2.598794
09202011	07	0.060	0.038	0.017	0.001	0.002	0.004	0.008	0.024	0.011	0.009	0.034	290.692	0.837	0.3482980	3.431082	0.4052270E-05	2.927733
09202011	08	0.050	0.035	0.021	0.001	0.002	0.004	0.009	0.026	0.010	0.010	0.034	291.668	0.837	0.2528976	2.772797	0.3289518E-05	2.925786
09202011	09	0.036	0.042	0.033	0.001	0.002	0.004	0.008	0.024	0.012	0.008	0.033	293.720	0.795	0.1398432	2.253880	0.3226371E-05	2.844217
09202011	10	0.013	0.078	0.052	0.001	0.002	0.002	0.005	0.013	0.032	0.003	0.032	295.644	0.754	0.1902300E-01	2.785125	0.1374851E-03	1.306589
09202011	11	0.004	0.069	0.060	0.000	0.001	0.001	0.004	0.010	0.039	0.001	0.031	296.364	0.731	0.2003521E-01	4.814192	0.4760827E-02	0.4840998E-02
09202011	12	0.001	0.035	0.058	0.000	0.001	0.001	0.003	0.008	0.038	0.001	0.039	296.754	0.722	0.6337166E-03	3.570819	0.4909647E-02	-0.1382824
09202011	13	0.001	0.019	0.053	0.000	0.001	0.001	0.003	0.009	0.042	0.001	0.042	297.156	0.710	0.6595254E-03	3.627432	0.5223700E-02	-0.1583790
09202011	14	0.006	0.019	0.052	0.000	0.001	0.002	0.004	0.012	0.053	0.001	0.042	297.341	0.708	0.2385670E-01	5.636810	0.5498592E-02	0.1078194E-01
09202011	15	0.023	0.019	0.049	0.000	0.001	0.002	0.005	0.014	0.047	0.002	0.042	297.539	0.715	NaN	5.056828	0.1983899E-01	-0.5936415
09202011	16	0.029	0.019	0.048	0.001	0.002	0.002	0.005	0.016	0.047	0.003	0.044	297.071	0.727	0.2831459E-01	3.782440	0.1624497E-03	1.367053
09202011	17	0.032	0.019	0.043	0.001	0.002	0.003	0.005	0.017	0.045	0.003	0.045	296.612	0.737	0.3825736E-01	4.005658	0.1310118E-03	1.485364
09202011	18	0.032	0.019	0.038	0.001	0.002	0.003	0.006	0.018	0.044	0.003	0.046	296.082	0.751	0.4543728E-01	4.147492	0.1192080E-03	1.541480
09202011	19	0.042	0.022	0.025	0.001	0.002	0.003	0.007	0.023	0.035	0.003	0.047	295.400	0.774	0.6848031E-01	3.873940	0.6178160E-04	1.797294
09202011	20	0.047	0.024	0.021	0.001	0.002	0.003	0.008	0.028	0.026	0.004	0.048	294.836	0.802	0.9264970E-01	3.736754	0.3428803E-04	2.037352
09202011	21	0.046	0.026	0.022	0.001	0.002	0.003	0.008	0.028	0.028	0.004	0.048	294.408	0.814	0.1094708	3.966191	0.3269505E-04	2.083892
09202011	22	0.043	0.027	0.021	0.001	0.002	0.003	0.008	0.025	0.034	0.004	0.047	293.900	0.859	0.1745449	5.941436	0.3885693E-04	2.184423
09202011	23	0.036	0.023	0.017	0.001	0.002	0.002	0.007	0.022	0.035	0.004	0.043	293.925	0.863	0.1385150	5.451479	0.4794294E-04	2.055790
09202011	24	0.017	0.018	0.012	0.002	0.001	0.002	0.005	0.017	0.038	0.002	0.038	293.687	0.906	0.1308033	8.003289	0.9095199E-04	1.944456
09212011	01	0.008	0.018	0.009	0.001	0.001	0.001	0.004	0.013	0.038	0.001	0.032	293.514	0.933	0.1113776	9.048469	0.1281812E-03	1.848751
09212011	02	0.006	0.023	0.009	0.001	0.001	0.001	0.003	0.011	0.033	0.000	0.027	293.407	0.947	0.1346793	10.87321	0.1223168E-03	1.948872
09212011	03	0.012	0.026	0.008	0.001	0.001	0.001	0.003	0.011	0.022	0.001	0.023	293.340	0.950	0.1371602	8.348169	0.6849877E-04	2.085909
09212011	04	0.019	0.028	0.008	0.001	0.001	0.001	0.003	0.011	0.013	0.001	0.019	293.170	0.960	0.2127544	7.819435	0.3098694E-04	2.401997
09212011	05	0.031	0.029	0.007	0.001	0.001	0.001	0.003	0.013	0.004	0.002	0.016	293.057	0.965	0.4398088	7.167656	0.8348372E-05	2.933775
09212011	06	0.044	0.032	0.008	0.001	0.001	0.002	0.004	0.016	0.001	0.001	0.015	293.041	0.965	0.3675222E-03	0.3457409E-02	0.1268505E-07	2.435458
09212011	07	0.056	0.038	0.003	0.002	0.002	0.004	0.006	0.022	0.001	0.005	0.016	293.083	0.965	0.4334812	4.151548	0.6372435E-05	2.813905
09212011	08	0.050	0.043	0.010	0.002	0.002	0.004	0.006	0.020	0.003	0.004	0.018	294.634	0.928	0.9095669E-04	0.5214278E-03	0.3454887E-08	2.178760
09212011	09	0.018	0.037	0.020	0.001	0.001	0.002	0.002	0.007	0.021	0.002	0.020	296.060	0.871	0.2988946E-01	3.420095	0.7565627E-04	1.655193
09212011	10	0.002	0.025	0.032	0.000	0.001	0.001	0.001	0.002	0.026	0.000	0.021	297.438	0.824	0.2775371E-02	3.479996	0.3505220E-02	-0.3136484E-02
09212011	11	0.001	0.019	0.042	0.000	0.000	0.000	0.000	0.001	0.024	0.000	0.019	298.596	0.773	0.4225969E-03	2.524580	0.3549515E-02	-0.1479798
09212011	12	0.001	0.019	0.054	0.000	0.000	0.000	0.000	0.001	0.024	0.000	0.018	299.359	0.742	0.3283620E-03	2.055003	0.3539294E-02	-0.2361043
09212011	13	0.001	0.020	0.066	0.000	0.000	0.000	0.000	0.001	0.024	0.000	0.019	300.030	0.711	0.1917481E-03	1.952400	0.3219008E-02	-0.2171533
09212011	14	0.001	0.022	0.071	0.000	0.000	0.001	0.000	0.001	0.025	0.000	0.022	300.268	0.698	0.2160072E-03	2.297709	0.2855373E-02	-0.9436783E-01
09212011	15	0.001	0.024	0.068	0.000	0.000	0.001	0.000	0.001	0.028	0.000	0.024	300.007	0.700	0.2435446E-03	2.501375	0.3171422E-02	-0.1030752
09212011	16	0.001	0.026	0.062	0.000	0.000	0.001	0.000	0.001	0.030	0.000	0.025	299.719	0.705	0.3029704E-03	2.697180	0.3529830E-02	-0.1168438
09212011	17	0.002	0.031	0.060	0.000	0.000	0.001	0.000	0.001	0.036	0.000	0.025	298.914	0.712	0.9835362E-03	2.725720	0.4701666E-02	-0.2367705
09212011	18	0.019	0.042	0.059	0.000	0.000	0.001	0.001	0.002	0.044	0.001	0.025	297.679	0.776	NaN	5.391610	0.3341398E-01	-0.7922097
09212011	19	0.038	0.054	0.055	0.000	0.001	0.002	0.001	0.003	0.043	0.002	0.026	296.804	0.772	NaN	6.917761	0.1009043E-01	-0.1639440
09212011	20	0.044	0.063	0.056	0.000	0.001	0.002	0.001	0.004	0.041	0.002	0.026	296.129	0.764	NaN	6.905881	0.6604425E-02	0.1938405E-01
09212011	21	0.044	0.065	0.064	0.000	0.001	0.002	0.001	0.003	0.042	0.002	0.025	295.748	0.766	NaN	7.351462	0.1191204E-01	-0.2096126
09212011	22	0.050	0.069	0.073	0.000	0.001	0.001	0.001	0.003	0.040	0.003	0.024	295.403	0.777	NaN	7.885388	0.1730385E-01	-0.3413198
09212011	23	0.045	0.062	0.076	0.000	0.001	0.001	0.002	0.003	0.038	0.004	0.023	295.047	0.814	NaN	8.736636	0.2441910E-01	-0.4463854
09212011	24	0.025	0.039	0.068	0.000	0.001	0.001	0.001	0.002	0.035	0.002	0.021	294.781	0.849	NaN	8.060247	0.3658178E-01	-0.6569165
09222011	01	0.012	0.023	0.044	0.000	0.001	0.001	0.001	0.001	0.032	0.001	0.019	294.683	0.882	NaN	7.278834	0.2575512E-01	-0.5488018
09222011	02	0.007	0.016	0.021	0.000	0.001	0.000	0.001	0.001	0.030	0.001	0.017	294.659	0.906	NaN	7.665849	0.9074296E-02	-0.7325270E-01
09222011	03	0.007	0.014	0.011	0.000	0.001	0.000	0.001	0.000	0.028	0.000	0.015	294.571	0.916	NaN	7.979975	0.2060856E-02	0.5879540
09222011	04	0.005	0.037	0.011	0.000	0.001	0.000	0.001	0.000	0.023	0.000	0.016	294.355	0.937	0.4169416E-01	8.656796	0.2978249E-02	0.4633961
09222011	05	0.000	0.079	0.017	0.000	0.000	0.000	0.000	0.000	0.016	0.000	0.029	294.249	0.940	0.3555238E-02	17.52695	0.1803277E-01	-0.1235607E-01
09222011	06	0.001	0.074	0.020	0.000	0.000	0.001	0.001	0.000	0.033	0.000	0.035	294.273	0.901	0.3598869E-02	11.65651	0.9295783E-02	0.9828274E-01
09222011	07	0.027	0.054	0.016	0.000	0.001	0.002	0.001	0.000	0.049	0.003	0.026	293.850	0.925	NaN	18.78829	0.2893904E-03	1.812403
09222011	08	0.041	0.033	0.017	0.001	0.001	0.002	0.001	0.001	0.034	0.004	0.018	294.882	0.905	0.1671200	7.087725	0.4580584E-04	2.189586
09222011	09	0.031	0.021	0.029	0.000	0.001	0.001	0.001	0.000	0.021	0.002	0.012	296.133	0.866	NaN	8.152077	0.8257856E-03	0.9944010
09222011	10	0.012	0.046	0.038	0.000	0.001	0.001	0.001	0.000	0.021	0.001	0.013	297.527	0.825	NaN	3.979254	0.2339084E-01	-0.7692442
09222011	11	0.001	0.066	0.047	0.000	0.000	0.000	0.001	0.000	0.024	0.000	0.022	298.219	0.796	0.4483461E-03	3.703547	0.3775773E-02	-0.8388000E-02
09222011	12	0.001	0.046	0.065	0.000	0.000	0.000	0.000	0.000	0.027	0.000	0.029	298.500	0.779	0.2079606E-03	4.659449	0.5452419E-02	-0.6825465E-01
09222011	13	0.000	0.027	0.070	0.000	0.000	0.000	0.000	0.000	0.028	0.000	0.030	299.241	0.767	0.1552701E-03	4.694788	0.5811352E-02	-0.9266127E-01
09222011	14	0.000	0.017	0.066	0.000	0.000	0.000	0.000	0.000	0.025	0.000	0.028	299.044	0.774	0.1314282E-03	4.485791	0.6223775E-02	-0.1422149
09222011	15	0.001	0.012	0.057	0.000	0.000	0.001	0.000	0.000	0.025	0.000	0.023	298.324	0.800	0.5561113E-03	3.917788	0.3826611E-02	0.1022662E-01
09222011	16	0.001	0.010	0.040	0.000	0.000	0.001	0.000	0.000	0.021	0.000	0.018	297.643	0.826	0.9304285E-03	3.524285	0.3365609E-02	0.2000729E-01
09222011	17	0.002	0.011	0.029	0.000	0.000	0.001	0.000	0.000	0.023	0.000	0.017	296.937	0.849	0.2538443E-02	3.653539	0.3352450E-02	0.3735152E-01
09222011	18	0.003	0.015	0.027	0.000	0.000	0.001	0.000	0.000	0.029	0.000	0.017	296.191	0.881	0.2435929E-01	4.695070	0.3219517E-02	0.1638513
09222011	19	0.006	0.022	0.026	0.000	0.000	0.001	0.000	0.000	0.037	0.001	0.020	295.363	0.927	NaN	11.04366	0.1318356E-01	-0.7691959E-01
09222011	20	0.002	0.021	0.023	0.000	0.000	0.001	0.000	0.000	0.029	0.000	0.022	295.031	0.945	0.2145463E-01	13.81117	0.4712750E-02	0.4669561
09222011	21	0.000	0.022	0.016	0.000	0.000	0.000	0.000	0.000	0.012	0.000	0.024	294.573	0.952	0.3863037E-02	17.34356	0.1612472E-01	0.3164599E-01
09222011	22	0.000	0.032	0.019	0.000	0.000	0.000	0.000	0.001	0.022	0.000	0.029	294.242	0.948	0.7102847E-02	19.19809	0.1313466E-01	0.1648393
09222011	23	0.001	0.044	0.032	0.000	0.000	0.000	0.001	0.001	0.033	0.001	0.029	293.957	0.945	0.1722175E-01	18.09412	0.7367417E-02	0.3902222
09222011	24	0.000	0.046	0.045	0.000	0.000	0.000	0.001	0.001	0.026	0.000	0.030	293.714	0.939	0.6790102E-02	16.14040	0.1089935E-01	0.1705135
09232011	01	0.000	0.041	0.051	0.000	0.000	0.000	0.000	0.001	0.021	0.000	0.031	293.511	0.935	0.4842222E-02	17.55649	0.1570597E-01	0.4837297E-01
09232011	02	0.000	0.044	0.058	0.000	0.000	0.000	0.000	0.001	0.023	0.000	0.031	293.310	0.929	0.4020572E-02	15.01572	0.1405115E-01	0.2883452E-01
09232011	03	0.000	0.050	0.064	0.000	0.000	0.000	0.000	0.001	0.030	0.001	0.032	293.135	0.926	0.5947590E-02	14.74618	0.1095457E-01	0.1290841
09232011	04	0.001	0.057	0.070	0.000	0.000	0.000	0.000	0.001	0.040	0.001	0.032	292.907	0.933	0.1222312E-01	14.11725	0.7470237E-02	0.2764158
09232011	05	0.002	0.067	0.076	0.000	0.000	0.000	0.000	0.001	0.051	0.003	0.031	292.470	0.946	0.4192424E-01	19.45679	0.6634430E-02	0.4672675
09232011	06	0.006	0.081	0.067	0.001	0.000	0.001	0.000	0.001	0.069	0.013	0.030	292.145	0.956	0.2080355	34.22657	0.7772705E-03	1.643791
09232011	07	0.010	0.095	0.052	0.002	0.000	0.002	0.000	0.001	0.091	0.032	0.032	292.193	0.982	0.5134150	112.1382	0.1834332E-02	1.786276
09232011	08	0.007	0.086	0.060	0.002	0.000	0.002	0.001	0.001	0.096	0.024	0.039	292.350	0.987	0.5362551	236.5157	0.7128199E-02	1.520880
09232011	09	0.003	0.068	0.061	0.001	0.000	0.002	0.001	0.001	0.075	0.007	0.040	293.517	0.949	0.8607125E-01	26.31596	0.1296454E-02	1.307462
09232011	10	0.002	0.094	0.064	0.000	0.000	0.001	0.001	0.001	0.056	0.002	0.037	295.685	0.877	0.1172298E-01	9.616307	0.5913076E-02	0.2111949
09232011	11	0.000	0.174	0.059	0.000	0.000	0.001	0.000	0.001	0.028	0.000	0.033	296.965	0.809	0.4037619E-03	6.167861	0.7645961E-02	-0.9329754E-01
09232011	12	0.000	0.122	0.067	0.000	0.000	0.000	0.000	0.001	0.028	0.000	0.036	297.240	0.792	0.2138615E-03	6.441570	0.1123544E-01	-0.2415983
09232011	13	0.000	0.082	0.079	0.000	0.000	0.001	0.000	0.000	0.035	0.000	0.038	298.620	0.744	0.1711845E-03	5.252200	0.6167359E-02	-0.6975801E-01
09232011	14	0.000	0.072	0.088	0.000	0.000	0.001	0.000	0.001	0.037	0.000	0.041	298.313	0.724	0.1354814E-03	5.094575	0.5906390E-02	-0.6421413E-01
09232011	15	0.001	0.064	0.099	0.000	0.000	0.001	0.000	0.001	0.050	0.000	0.042	298.735	0.723	0.4546046E-03	4.798595	0.5471746E-02	-0.5701178E-01
09232011	16	0.001	0.065	0.087	0.000	0.000	0.001	0.001	0.001	0.052	0.000	0.041	298.312	0.729	0.6728172E-03	4.783417	0.6111232E-02	-0.1063905
09232011	17	0.002	0.064	0.073	0.000	0.000	0.001	0.001	0.001	0.055	0.000	0.038	297.401	0.750	0.1804829E-02	4.807174	0.6408890E-02	-0.1248929
09232011	18	0.005	0.056	0.056	0.000	0.000	0.001	0.001	0.001	0.054	0.001	0.031	296.108	0.785	NaN	5.136416	0.4992470E-01	-0.9876553
09232011	19	0.030	0.047	0.034	0.000	0.001	0.001	0.001	0.001	0.045	0.002	0.025	294.777	0.832	NaN	8.493126	0.2936074E-02	0.4613006
09232011	20	0.036	0.035	0.023	0.001	0.001	0.001	0.001	0.001	0.037	0.002	0.021	293.897	0.852	0.9612930E-01	4.829247	0.8002696E-04	1.780643
09232011	21	0.027	0.023	0.019	0.001	0.001	0.001	0.001	0.001	0.033	0.002	0.019	293.000	0.887	0.1161486	5.878339	0.8136605E-04	1.858811
09232011	22	0.014	0.015	0.017	0.001	0.001	0.001	0.001	0.001	0.035	0.001	0.020	292.471	0.874	0.6107360E-01	5.000269	0.1594870E-03	1.496268
09232011	23	0.004	0.013	0.016	0.001	0.001	0.000	0.001	0.001	0.045	0.001	0.026	291.724	0.887	0.5834943E-01	7.481978	0.3955254E-03	1.276842
09232011	24	0.001	0.016	0.016	0.001	0.001	0.000	0.001	0.002	0.054	0.000	0.038	291.077	0.888	0.000000	10.36478	0.5981381E-02	0.2387588
09242011	01	0.001	0.016	0.017	0.001	0.001	0.001	0.002	0.003	0.066	0.000	0.052	290.378	0.893	0.000000	14.13374	0.8808132E-02	0.2053734
09242011	02	0.001	0.015	0.018	0.001	0.001	0.001	0.002	0.005	0.082	0.001	0.063	289.881	0.892	0.000000	16.60469	0.9944816E-02	0.2226340
09242011	03	0.001	0.015	0.019	0.001	0.001	0.001	0.003	0.006	0.094	0.001	0.069	289.439	0.901	0.000000	19.85460	0.9329540E-02	0.3280008
09242011	04	0.001	0.016	0.020	0.001	0.001	0.001	0.003	0.007	0.102	0.002	0.071	289.061	0.911	0.000000	22.60081	0.7779935E-02	0.4631481
09242011	05	0.001	0.019	0.022	0.001	0.001	0.001	0.003	0.008	0.107	0.003	0.072	288.696	0.924	0.000000	25.56702	0.6463122E-02	0.5972378
09242011	06	0.002	0.023	0.022	0.001	0.001	0.001	0.004	0.009	0.112	0.005	0.071	288.406	0.934	0.000000	28.74853	0.4084361E-02	0.8474916
09242011	07	0.003	0.029	0.021	0.001	0.002	0.001	0.004	0.011	0.118	0.008	0.070	288.177	0.940	0.2460794	44.13495	0.9163895E-02	0.6827025
09242011	08	0.002	0.032	0.027	0.001	0.002	0.002	0.004	0.012	0.117	0.008	0.070	289.266	0.898	0.1964986E-02	27.49764	0.4415787E-02	0.7942873
09242011	09	0.002	0.039	0.037	0.000	0.001	0.002	0.004	0.010	0.103	0.003	0.069	291.627	0.782	0.3608257E-01	9.229906	0.5931984E-02	0.1919973
09242011	10	0.001	0.058	0.052	0.000	0.001	0.001	0.004	0.009	0.085	0.001	0.069	294.564	0.647	0.8638501E-03	5.139901	0.1717496E-01	-0.5239410
09242011	11	0.000	0.135	0.073	0.000	0.001	0.001	0.003	0.008	0.070	0.001	0.074	296.875	0.541	0.7641315E-04	4.035295	0.2262803E-02	0.2512284
09242011	12	0.000	0.138	0.088	0.000	0.001	0.001	0.003	0.006	0.052	0.000	0.064	298.359	0.474	0.5185604E-05	2.919030	0.1474679E-02	0.2965412
09242011	13	0.000	0.101	0.097	0.000	0.001	0.001	0.002	0.006	0.046	0.000	0.052	299.727	0.420	0.1043081E-04	1.829565	0.6120552E-03	0.4755573
09242011	14	0.000	0.084	0.097	0.000	0.001	0.001	0.002	0.005	0.044	0.000	0.046	300.232	0.399	0.1257658E-04	1.491022	0.7458786E-03	0.3008158
09242011	15	0.000	0.075	0.091	0.000	0.001	0.001	0.002	0.005	0.044	0.000	0.044	299.786	0.402	0.1537800E-04	1.408335	0.9831217E-03	0.1560987
09242011	16	0.000	0.074	0.087	0.000	0.001	0.001	0.002	0.005	0.048	0.000	0.044	298.788	0.420	0.2425909E-04	1.499579	0.2301220E-02	-0.1859888
09242011	17	0.001	0.076	0.081	0.000	0.001	0.001	0.002	0.005	0.053	0.000	0.044	297.453	0.444	0.7057190E-04	1.576724	0.1781846E-01	-1.053114
09242011	18	0.001	0.083	0.072	0.000	0.001	0.001	0.003	0.006	0.061	0.000	0.045	296.051	0.467	0.4717708E-03	1.993628	0.9131256E-02	-0.6608864
09242011	19	0.016	0.101	0.058	0.000	0.001	0.001	0.003	0.010	0.069	0.001	0.047	294.522	0.495	NaN	2.760181	0.4009557E-01	-1.162159
09242011	20	0.055	0.117	0.053	0.000	0.001	0.002	0.005	0.016	0.059	0.003	0.049	293.211	0.534	NaN	3.736586	0.6748273E-03	0.7432823
09242011	21	0.059	0.113	0.054	0.000	0.001	0.003	0.006	0.018	0.058	0.005	0.050	292.165	0.576	NaN	4.557725	0.2484806E-03	1.263456
09242011	22	0.055	0.101	0.053	0.000	0.001	0.003	0.006	0.018	0.060	0.007	0.051	291.463	0.604	NaN	4.999371	0.6193916E-03	0.9069501
09242011	23	0.049	0.086	0.048	0.000	0.001	0.002	0.006	0.017	0.062	0.007	0.050	290.767	0.642	NaN	5.494230	0.8463846E-03	0.8123391
09242011	24	0.042	0.072	0.040	0.000	0.001	0.002	0.006	0.016	0.063	0.007	0.050	290.276	0.667	NaN	5.866326	0.8967528E-03	0.8156935
09252011	01	0.033	0.062	0.035	0.000	0.001	0.002	0.005	0.015	0.064	0.006	0.049	289.745	0.693	NaN	5.936683	0.1925946E-02	0.4888998
09252011	02	0.026	0.056	0.034	0.000	0.001	0.002	0.005	0.014	0.065	0.006	0.048	289.422	0.710	NaN	6.102167	0.4764015E-02	0.1075109
09252011	03	0.021	0.050	0.035	0.000	0.001	0.002	0.005	0.013	0.064	0.006	0.047	289.018	0.731	NaN	6.233754	0.9962127E-02	-0.2036024
09252011	04	0.019	0.049	0.038	0.000	0.001	0.002	0.005	0.013	0.065	0.007	0.047	288.737	0.748	NaN	6.701520	0.1399159E-01	-0.3196937
09252011	05	0.020	0.049	0.037	0.000	0.001	0.002	0.005	0.014	0.064	0.008	0.047	288.488	0.763	NaN	7.004272	0.1212699E-01	-0.2383898
09252011	06	0.021	0.051	0.037	0.000	0.001	0.002	0.005	0.015	0.063	0.009	0.047	288.279	0.775	NaN	7.694138	0.1098895E-01	-0.1547962
09252011	07	0.022	0.055	0.040	0.000	0.001	0.002	0.006	0.016	0.064	0.012	0.048	288.095	0.785	NaN	8.354548	0.1320242E-01	-0.1987306
09252011	08	0.024	0.064	0.046	0.000	0.001	0.002	0.006	0.018	0.064	0.013	0.049	289.565	0.758	NaN	7.405755	0.1602744E-01	-0.3352948
09252011	09	0.018	0.069	0.077	0.000	0.001	0.002	0.005	0.016	0.067	0.009	0.050	292.348	0.693	NaN	5.358304	0.5459873E-01	-1.008155
09252011	10	0.018	0.085	0.108	0.000	0.001	0.002	0.005	0.014	0.068	0.005	0.051	295.405	0.618	NaN	4.266842	0.8873199E-01	-1.317974
09252011	11	0.007	0.196	0.120	0.000	0.001	0.002	0.004	0.012	0.069	0.001	0.055	298.605	0.535	0.7301331E-02	3.120769	0.5398874E-02	-0.2380415
09252011	12	0.001	0.221	0.108	0.000	0.001	0.001	0.003	0.008	0.056	0.000	0.057	300.359	0.501	0.5888939E-04	2.542993	0.2181334E-02	0.6662298E-01
09252011	13	0.001	0.155	0.107	0.000	0.001	0.001	0.002	0.006	0.045	0.000	0.049	302.127	0.473	0.2598763E-04	2.052950	0.1177075E-02	0.2415744
09252011	14	0.000	0.105	0.093	0.000	0.001	0.001	0.002	0.005	0.035	0.000	0.040	302.951	0.468	0.1758337E-04	1.698243	0.8965181E-03	0.2774409
09252011	15	0.000	0.072	0.073	0.000	0.000	0.001	0.001	0.004	0.028	0.000	0.036	302.697	0.486	0.2205372E-05	1.864190	0.1664920E-02	0.4909671E-01
09252011	16	0.000	0.056	0.052	0.000	0.000	0.001	0.001	0.003	0.025	0.000	0.036	301.903	0.511	0.1728535E-05	2.357692	0.5485468E-02	-0.3667267
09252011	17	0.000	0.040	0.039	0.000	0.000	0.001	0.001	0.003	0.023	0.000	0.035	300.640	0.551	0.3576279E-05	2.677535	0.6675653E-02	-0.3967587
09252011	18	0.001	0.042	0.036	0.000	0.000	0.001	0.002	0.005	0.032	0.000	0.034	299.250	0.594	0.9495020E-04	2.105788	0.2032271E-02	0.1543308E-01
09252011	19	0.024	0.063	0.038	0.000	0.001	0.002	0.003	0.011	0.040	0.001	0.036	297.558	0.643	NaN	3.428513	0.1232600E-01	-0.5557165
09252011	20	0.047	0.074	0.044	0.000	0.001	0.002	0.004	0.015	0.033	0.001	0.036	296.366	0.696	NaN	4.991548	0.6505747E-03	0.8849381
09252011	21	0.036	0.059	0.036	0.001	0.001	0.002	0.004	0.014	0.032	0.002	0.035	295.769	0.755	0.3918999E-01	3.219039	0.8938817E-04	1.556446
09252011	22	0.019	0.041	0.020	0.001	0.001	0.002	0.004	0.011	0.030	0.001	0.029	295.385	0.802	0.2989691E-01	3.185919	0.1028296E-03	1.491117
09252011	23	0.011	0.037	0.008	0.002	0.001	0.001	0.003	0.007	0.024	0.001	0.022	295.020	0.843	0.2994263E-01	3.177082	0.1012315E-03	1.496713
09252011	24	0.003	0.023	0.005	0.001	0.001	0.001	0.002	0.005	0.021	0.000	0.018	294.198	0.912	0.000000	6.871500	0.2625705E-02	0.4178056
09262011	01	0.001	0.015	0.005	0.001	0.001	0.000	0.001	0.002	0.018	0.000	0.015	293.816	0.942	0.000000	6.896657	0.2626640E-02	0.4192382
09262011	02	0.003	0.011	0.005	0.000	0.001	0.000	0.001	0.001	0.015	0.000	0.011	293.832	0.949	0.7032061E-01	6.616010	0.2099597E-02	0.4984602
09262011	03	0.007	0.011	0.006	0.001	0.001	0.000	0.001	0.001	0.011	0.000	0.008	293.806	0.947	0.4310524E-01	4.629255	0.7664177E-04	1.781046
09262011	04	0.007	0.012	0.006	0.001	0.001	0.000	0.001	0.001	0.011	0.000	0.008	293.774	0.943	0.3743935E-01	3.819292	0.6850630E-04	1.746252
09262011	05	0.015	0.017	0.006	0.001	0.001	0.001	0.001	0.001	0.013	0.000	0.008	293.780	0.939	0.6931800E-01	3.862714	0.3334539E-04	2.063857
09262011	06	0.031	0.026	0.006	0.002	0.001	0.001	0.001	0.001	0.015	0.001	0.009	293.792	0.941	0.1411488	4.747965	0.2218586E-04	2.330431
09262011	07	0.042	0.041	0.005	0.001	0.001	0.002	0.001	0.001	0.014	0.001	0.010	293.834	0.947	0.2561708	6.533049	0.1753536E-04	2.571201
09262011	08	0.024	0.057	0.010	0.001	0.001	0.001	0.001	0.001	0.019	0.001	0.012	295.177	0.914	0.5717927E-01	4.103668	0.5325058E-04	1.886848
09262011	09	0.025	0.073	0.020	0.001	0.001	0.001	0.001	0.001	0.026	0.001	0.016	296.869	0.820	0.2146930E-01	2.897661	0.1093329E-03	1.423297
09262011	10	0.004	0.092	0.041	0.001	0.001	0.001	0.001	0.001	0.039	0.001	0.023	298.319	0.753	0.1355958E-01	3.125855	0.2422837E-03	1.110645
09262011	11	0.006	0.082	0.065	0.001	0.001	0.001	0.001	0.002	0.045	0.001	0.026	299.615	0.689	0.9284556E-02	2.775808	0.2723680E-03	1.008233
09262011	12	0.003	0.086	0.096	0.001	0.001	0.001	0.001	0.002	0.048	0.001	0.034	300.448	0.639	0.000000	2.869837	0.5853849E-02	-0.3095844
09262011	13	0.001	0.081	0.110	0.001	0.001	0.001	0.001	0.003	0.044	0.001	0.042	302.470	0.543	0.000000	2.392475	0.2094412E-02	0.5778527E-01
09262011	14	0.000	0.079	0.094	0.000	0.001	0.001	0.001	0.004	0.034	0.000	0.044	303.543	0.492	0.1907349E-05	2.356202	0.2654979E-02	-0.5184856E-01
09262011	15	0.000	0.070	0.077	0.000	0.001	0.001	0.001	0.004	0.034	0.000	0.039	303.168	0.501	0.1484156E-04	1.927335	0.9731789E-03	0.2967646
09262011	16	0.001	0.072	0.068	0.000	0.001	0.001	0.002	0.005	0.040	0.000	0.036	302.310	0.529	0.8279085E-04	1.766790	0.3675377E-02	-0.3181169
09262011	17	0.002	0.079	0.059	0.000	0.001	0.001	0.002	0.006	0.047	0.000	0.037	301.091	0.566	0.5101562E-03	2.217484	0.5802853E-02	-0.4177811
09262011	18	0.010	0.083	0.046	0.000	0.001	0.001	0.003	0.009	0.051	0.001	0.038	299.688	0.609	0.1800346E-01	4.171521	0.5992202E-02	-0.1572920
09262011	19	0.048	0.110	0.034	0.001	0.002	0.002	0.004	0.016	0.036	0.001	0.038	298.217	0.661	0.2200902E-01	2.381878	0.8651320E-04	1.439837
09262011	20	0.072	0.130	0.034	0.001	0.002	0.003	0.005	0.021	0.020	0.002	0.036	296.963	0.710	0.4671699E-01	2.060580	0.1854045E-04	2.045869
09262011	21	0.075	0.138	0.036	0.001	0.002	0.003	0.005	0.021	0.013	0.003	0.033	295.985	0.757	0.7111394E-01	2.093500	0.9933065E-05	2.323790
09262011	22	0.072	0.141	0.037	0.001	0.002	0.003	0.005	0.021	0.012	0.004	0.031	295.254	0.794	0.9653848E-01	2.134279	0.6280589E-05	2.531251
09262011	23	0.065	0.141	0.040	0.001	0.002	0.002	0.005	0.020	0.015	0.005	0.030	294.680	0.826	0.1146857	2.679694	0.9433747E-05	2.453401
09262011	24	0.055	0.139	0.044	0.001	0.002	0.002	0.005	0.018	0.020	0.007	0.030	294.157	0.860	0.1533525	4.128225	0.1697397E-04	2.385980
09272011	01	0.045	0.136	0.046	0.001	0.002	0.002	0.005	0.018	0.027	0.010	0.031	293.670	0.897	0.2447860	7.571861	0.2884034E-04	2.419202
09272011	02	0.035	0.133	0.044	0.001	0.002	0.001	0.004	0.017	0.037	0.014	0.033	293.279	0.920	0.2817906	11.68833	0.5974362E-04	2.291461
09272011	03	0.029	0.130	0.040	0.001	0.002	0.001	0.004	0.017	0.047	0.017	0.035	292.967	0.931	0.3455999	15.70411	0.7934539E-04	2.296492
09272011	04	0.029	0.125	0.033	0.002	0.002	0.001	0.004	0.017	0.055	0.020	0.038	292.677	0.937	0.4370095	21.87455	0.1034146E-03	2.325357
09272011	05	0.041	0.117	0.021	0.003	0.002	0.002	0.005	0.018	0.061	0.025	0.040	292.384	0.944	0.5958036	24.67665	0.6997093E-04	2.547369
09272011	06	0.064	0.109	0.010	0.005	0.002	0.003	0.005	0.020	0.064	0.029	0.041	292.164	0.947	0.7874200	32.45021	0.4660986E-04	2.842740
09272011	07	0.086	0.105	0.007	0.006	0.002	0.004	0.006	0.022	0.063	0.030	0.043	292.060	0.951	0.8442305	33.33135	0.3349617E-04	2.997858
09272011	08	0.076	0.100	0.017	0.004	0.002	0.004	0.006	0.022	0.064	0.028	0.046	293.824	0.881	0.4382710	10.69319	0.2627563E-04	2.609554
09272011	09	0.048	0.093	0.048	0.002	0.003	0.003	0.005	0.017	0.064	0.013	0.048	296.189	0.779	0.1041893	5.557091	0.7487889E-04	1.870488
09272011	10	0.005	0.120	0.068	0.001	0.002	0.001	0.003	0.009	0.070	0.003	0.050	298.211	0.694	0.7331371E-04	4.682553	0.4753717E-02	-0.6550546E-02
09272011	11	0.002	0.159	0.073	0.000	0.001	0.001	0.003	0.008	0.056	0.001	0.045	299.753	0.631	0.9692311E-03	3.176276	0.6413138E-02	-0.3051524
09272011	12	0.002	0.132	0.083	0.000	0.001	0.001	0.004	0.008	0.054	0.001	0.043	300.832	0.595	0.1129746E-02	2.776386	0.5828835E-02	-0.3221018
09272011	13	0.003	0.106	0.084	0.000	0.001	0.001	0.004	0.008	0.056	0.001	0.044	301.719	0.560	0.1079917E-02	2.549068	0.5983275E-02	-0.3705575
09272011	14	0.003	0.089	0.072	0.000	0.001	0.001	0.004	0.009	0.058	0.001	0.046	301.306	0.554	0.1107454E-02	2.544032	0.6074349E-02	-0.3779772
09272011	15	0.002	0.073	0.064	0.000	0.001	0.001	0.004	0.008	0.063	0.001	0.050	300.595	0.567	0.5604625E-03	2.909645	0.7437570E-02	-0.4075911
09272011	16	0.001	0.060	0.059	0.000	0.001	0.001	0.003	0.008	0.064	0.001	0.052	299.588	0.586	0.3752708E-03	3.137172	0.8793224E-02	-0.4476098
09272011	17	0.001	0.054	0.052	0.000	0.001	0.001	0.003	0.008	0.063	0.001	0.054	298.643	0.613	0.2986193E-03	3.406718	0.1034208E-01	-0.4822716
09272011	18	0.002	0.045	0.042	0.000	0.001	0.001	0.004	0.010	0.067	0.001	0.057	297.369	0.643	0.7559061E-03	3.979189	0.9095769E-02	-0.3590448
09272011	19	0.011	0.051	0.044	0.000	0.001	0.002	0.005	0.015	0.079	0.001	0.059	296.012	0.675	0.3866702E-01	7.500697	0.6447603E-02	0.6570329E-01
09272011	20	0.051	0.069	0.043	0.000	0.002	0.003	0.006	0.022	0.070	0.003	0.062	296.963	0.710	NaN	7.619362	0.5118929E-03	1.172740
09272011	21	0.057	0.072	0.039	0.001	0.002	0.003	0.007	0.023	0.078	0.005	0.067	295.985	0.757	0.1207827	6.878736	0.1228925E-03	1.747983
09272011	22	0.048	0.070	0.039	0.001	0.002	0.003	0.007	0.022	0.089	0.006	0.071	295.254	0.794	0.1515837	8.738158	0.1544930E-03	1.752511
09272011	23	0.035	0.072	0.043	0.001	0.002	0.003	0.007	0.021	0.099	0.007	0.074	294.680	0.826	0.1746110	11.63538	0.2105714E-03	1.742381
09272011	24	0.022	0.078	0.052	0.001	0.002	0.002	0.006	0.020	0.107	0.008	0.076	294.157	0.860	0.1565415	14.71166	0.3694285E-03	1.600131
09282011	01	0.005	0.085	0.065	0.000	0.002	0.002	0.006	0.019	0.120	0.007	0.078	293.670	0.897	0.1055830	31.73788	0.1102828E-01	0.4590701
09282011	02	0.003	0.093	0.076	0.000	0.002	0.002	0.006	0.019	0.120	0.009	0.079	293.279	0.920	0.1077284	36.60597	0.1198750E-01	0.4848231
09282011	03	0.003	0.102	0.083	0.001	0.002	0.002	0.006	0.019	0.119	0.009	0.080	292.967	0.931	0.1093181	39.53994	0.1258441E-01	0.4972031
09282011	04	0.003	0.107	0.083	0.001	0.002	0.002	0.006	0.020	0.122	0.011	0.080	292.677	0.937	0.1346027	51.12312	0.1498816E-01	0.5328691
09282011	05	0.010	0.105	0.057	0.002	0.002	0.002	0.007	0.021	0.128	0.026	0.078	292.384	0.944	0.3518182	43.20772	0.6559331E-03	1.818702
09282011	06	0.027	0.101	0.023	0.006	0.002	0.003	0.007	0.024	0.132	0.042	0.074	292.164	0.947	0.7066272	59.66101	0.2504450E-03	2.376978
09282011	07	0.058	0.102	0.009	0.007	0.003	0.005	0.008	0.027	0.115	0.041	0.070	292.060	0.951	0.8498868	54.33204	0.8670081E-04	2.797033
09282011	08	0.064	0.100	0.017	0.005	0.003	0.005	0.009	0.028	0.095	0.033	0.067	293.824	0.881	0.4962583	15.90677	0.4988692E-04	2.503595
09282011	09	0.049	0.094	0.047	0.002	0.003	0.004	0.008	0.023	0.084	0.018	0.064	296.189	0.779	0.1405544	7.386733	0.9028378E-04	1.912843
09282011	10	0.024	0.121	0.073	0.001	0.002	0.002	0.007	0.015	0.082	0.006	0.060	298.211	0.694	0.2626485E-01	5.204490	0.3707785E-03	1.147264
09282011	11	0.006	0.163	0.087	0.000	0.002	0.002	0.006	0.013	0.082	0.003	0.057	299.753	0.631	0.1948649E-01	6.420807	0.7614164E-02	-0.7403256E-01
09282011	12	0.005	0.142	0.100	0.000	0.002	0.002	0.007	0.012	0.078	0.002	0.058	300.832	0.595	0.1254582E-01	4.649212	0.6819304E-02	-0.1663607
09282011	13	0.004	0.115	0.096	0.000	0.002	0.002	0.006	0.012	0.076	0.001	0.059	301.719	0.560	0.5571544E-02	3.555482	0.6450438E-02	-0.2586907
09282011	14	0.003	0.096	0.079	0.000	0.001	0.002	0.006	0.011	0.074	0.001	0.060	301.306	0.554	0.1063406E-02	3.322912	0.7342328E-02	-0.3443150
09282011	15	0.002	0.079	0.067	0.000	0.001	0.002	0.005	0.011	0.073	0.001	0.063	300.595	0.567	0.4369020E-03	3.511967	0.8418037E-02	-0.3796605
09282011	16	0.001	0.065	0.060	0.000	0.001	0.001	0.005	0.010	0.071	0.001	0.064	299.588	0.586	0.2491474E-03	3.711383	0.7600249E-02	-0.3112921
09282011	17	0.001	0.058	0.052	0.000	0.001	0.001	0.004	0.009	0.068	0.001	0.064	298.643	0.613	0.2524257E-03	4.158149	0.6292306E-02	-0.1799099
09282011	18	0.001	0.047	0.040	0.000	0.001	0.001	0.004	0.011	0.071	0.001	0.064	297.369	0.643	0.4515648E-03	4.383284	0.9725745E-02	-0.3461232
09282011	19	0.006	0.053	0.044	0.000	0.001	0.002	0.006	0.016	0.089	0.001	0.067	296.012	0.675	0.3338569E-01	6.501476	0.5874394E-02	0.4404894E-01
09282011	20	0.043	0.058	0.047	0.000	0.002	0.003	0.007	0.024	0.081	0.004	0.069	294.964	0.714	NaN	8.315097	0.2128326E-02	0.5918292
09282011	21	0.050	0.049	0.039	0.001	0.002	0.003	0.008	0.027	0.076	0.006	0.069	294.031	0.760	0.1616045	6.735758	0.1055386E-03	1.804975
09282011	22	0.050	0.043	0.032	0.001	0.002	0.003	0.009	0.027	0.073	0.008	0.068	293.297	0.799	0.2195178	7.964065	0.9150957E-04	1.939668
09282011	23	0.045	0.040	0.028	0.001	0.002	0.003	0.009	0.027	0.074	0.009	0.067	292.634	0.834	0.2729552	9.241008	0.8657022E-04	2.028351
09282011	24	0.039	0.042	0.027	0.001	0.002	0.003	0.009	0.025	0.081	0.012	0.068	292.032	0.867	0.3543669	13.36939	0.1076042E-03	2.094283
09292011	01	0.031	0.044	0.025	0.001	0.002	0.002	0.009	0.024	0.091	0.017	0.069	291.353	0.915	0.4971688	24.84710	0.1560509E-03	2.202009
09292011	02	0.022	0.048	0.021	0.002	0.002	0.002	0.009	0.023	0.103	0.025	0.069	290.806	0.946	0.6445427	46.60572	0.2464082E-03	2.276784
09292011	03	0.015	0.052	0.020	0.002	0.002	0.002	0.009	0.023	0.112	0.033	0.069	290.404	0.958	0.6935496	64.16525	0.3662691E-03	2.243500
09292011	04	0.014	0.057	0.022	0.003	0.002	0.002	0.009	0.024	0.118	0.041	0.069	290.083	0.963	0.7058837	69.20372	0.4179064E-03	2.219050
09292011	05	0.020	0.064	0.018	0.003	0.002	0.003	0.009	0.026	0.125	0.052	0.069	289.852	0.959	0.8108881	76.60499	0.2952214E-03	2.414109
09292011	06	0.037	0.072	0.010	0.004	0.003	0.004	0.011	0.030	0.125	0.062	0.070	289.650	0.956	0.9081665	81.27496	0.1474919E-03	2.741189
09292011	07	0.053	0.073	0.007	0.005	0.003	0.005	0.012	0.035	0.119	0.067	0.070	289.511	0.948	0.9178796	62.44534	0.8134275E-04	2.885181
09292011	08	0.044	0.068	0.017	0.004	0.003	0.005	0.012	0.036	0.112	0.065	0.070	290.861	0.891	0.6824970	22.75861	0.5693324E-04	2.601780
09292011	09	0.040	0.065	0.051	0.002	0.003	0.004	0.011	0.032	0.087	0.036	0.068	293.573	0.779	0.2328917	7.560695	0.5643980E-04	2.126976
09292011	10	0.032	0.084	0.081	0.000	0.003	0.003	0.009	0.022	0.072	0.012	0.061	296.763	0.638	NaN	5.711888	0.4094097E-01	-0.8553784
09292011	11	0.020	0.105	0.102	0.000	0.002	0.002	0.008	0.016	0.072	0.004	0.058	298.609	0.559	NaN	3.839161	0.8084498E-01	-1.323417
09292011	12	0.005	0.090	0.097	0.000	0.002	0.002	0.007	0.013	0.080	0.001	0.059	299.920	0.520	0.1210898E-01	3.951518	0.6636237E-02	-0.2251579
09292011	13	0.002	0.081	0.091	0.000	0.001	0.001	0.006	0.011	0.078	0.001	0.061	301.312	0.480	0.5002022E-03	2.631093	0.8478561E-02	-0.5081860
09292011	14	0.001	0.077	0.084	0.000	0.001	0.001	0.005	0.010	0.073	0.001	0.062	301.834	0.463	0.7909536E-04	2.256951	0.1129521E-01	-0.6993723
09292011	15	0.001	0.070	0.081	0.000	0.001	0.001	0.005	0.010	0.071	0.001	0.065	300.341	0.477	0.7390976E-04	2.537354	0.5577766E-02	-0.3420793
09292011	16	0.001	0.065	0.080	0.000	0.001	0.001	0.005	0.010	0.075	0.001	0.068	300.169	0.498	0.9381771E-04	2.883116	0.6080885E-02	-0.3241047
09292011	17	0.001	0.059	0.072	0.000	0.001	0.002	0.005	0.011	0.080	0.001	0.070	298.603	0.527	0.2055168E-03	3.292651	0.1886182E-01	-0.7580378
09292011	18	0.011	0.056	0.058	0.000	0.002	0.002	0.007	0.017	0.090	0.001	0.068	297.567	0.557	0.2562678E-01	5.737063	0.6950276E-02	-0.8331237E-01
09292011	19	0.055	0.055	0.045	0.000	0.002	0.003	0.010	0.026	0.061	0.003	0.065	296.075	0.597	NaN	5.031515	0.4100250E-03	1.088888
09292011	20	0.077	0.059	0.040	0.001	0.002	0.004	0.012	0.035	0.038	0.006	0.061	294.964	0.714	0.1244119	3.595753	0.2491364E-04	2.159353
09292011	21	0.072	0.053	0.031	0.001	0.003	0.004	0.012	0.037	0.029	0.007	0.059	294.031	0.760	0.1718521	3.828647	0.1660057E-04	2.362922
09292011	22	0.064	0.050	0.024	0.001	0.003	0.004	0.012	0.036	0.029	0.007	0.058	293.297	0.799	0.2174764	4.553266	0.1785168E-04	2.406644
09292011	23	0.054	0.050	0.023	0.001	0.003	0.004	0.012	0.033	0.036	0.009	0.057	292.634	0.834	0.2680010	5.907348	0.2427509E-04	2.386232
09292011	24	0.045	0.056	0.025	0.001	0.003	0.003	0.012	0.030	0.045	0.012	0.057	292.032	0.867	0.3391708	9.065147	0.4147894E-04	2.339547
