# Supplementary material for: Understanding nitrate formation in a world with less sulfate
Source: Copernicus journal article supplement (doi:10.5194/acp-18-12765-2018), 2018-09-05
Supplement: Supplementary file 2 [file acp-18-12765-2018-supplement.zip › DATA/RAW DATA FOR DIURNALS/data_extract_JST_sep_mod2011.csv]

Date	Hour	NH3	SO2	HNO3	CL	NA	MG	K	CA	NH4	NO3	SO4	T	RH	e_NO3	Water	H+	pH
09022011	01	0.191	0.029	0.044	0.000	0.001	0.002	0.006	0.022	0.001	0.001	0.016	297.248	0.697	NaN	2.539196	0.5454881E-05	2.667911
09022011	02	0.187	0.030	0.038	0.000	0.001	0.002	0.006	0.022	0.001	0.001	0.017	296.686	0.735	NaN	2.706008	0.6420583E-05	2.624755
09022011	03	0.178	0.031	0.032	0.000	0.001	0.002	0.006	0.022	0.002	0.002	0.017	296.281	0.757	NaN	2.637188	0.6651204E-05	2.598241
09022011	04	0.175	0.032	0.027	0.000	0.001	0.002	0.006	0.023	0.002	0.002	0.018	295.969	0.766	NaN	2.386340	0.5969227E-05	2.601814
09022011	05	0.184	0.033	0.021	0.000	0.001	0.003	0.007	0.026	0.002	0.003	0.018	295.654	0.778	NaN	3.197737	0.2576332E-09	7.093841
09022011	06	0.202	0.035	0.005	0.002	0.002	0.003	0.008	0.028	0.002	0.016	0.019	295.349	0.790	NaN	3.219196	0.2582758E-09	7.095664
09022011	07	0.225	0.036	0.000	0.004	0.002	0.005	0.009	0.031	0.002	0.024	0.019	295.186	0.806	NaN	4.099306	0.3300982E-09	7.094067
09022011	08	0.188	0.034	0.000	0.004	0.002	0.005	0.009	0.033	0.014	0.055	0.019	296.752	0.756	NaN	6.520167	0.2985780E-05	3.339201
09022011	09	0.145	0.027	0.065	0.001	0.001	0.003	0.006	0.023	0.008	0.012	0.018	299.290	0.653	0.000000	0.4890261E-08	0.4145083E-18	7.071799
09022011	10	0.132	0.023	0.096	0.000	0.001	0.002	0.005	0.017	0.003	0.003	0.018	301.859	0.555	NaN	2.938227	0.1864828E-04	2.197447
09022011	11	0.120	0.015	0.101	0.000	0.001	0.001	0.003	0.011	0.007	0.002	0.017	304.146	0.481	NaN	2.397921	0.2278136E-04	2.022255
09022011	12	0.094	0.011	0.088	0.000	0.001	0.001	0.003	0.008	0.012	0.000	0.016	306.052	0.424	NaN	1.629287	0.3095403E-04	1.721281
09022011	13	0.064	0.009	0.067	0.000	0.001	0.001	0.002	0.007	0.013	0.000	0.015	307.758	0.373	NaN	1.018867	0.3792585E-03	0.4291824
09022011	14	0.048	0.009	0.051	0.000	0.001	0.001	0.002	0.006	0.018	0.000	0.017	308.384	0.351	NaN	0.8841801	0.6558938E-03	0.1297072
09022011	15	0.040	0.012	0.039	0.000	0.001	0.001	0.002	0.006	0.024	0.000	0.020	308.152	0.349	NaN	0.9156601	0.2231752E-03	0.6130883
09022011	16	0.040	0.017	0.029	0.000	0.001	0.001	0.002	0.006	0.029	0.000	0.022	307.347	0.362	NaN	0.9569578	0.9669332E-04	0.9954963
09022011	17	0.042	0.025	0.025	0.000	0.001	0.001	0.002	0.006	0.031	0.000	0.023	306.104	0.385	NaN	1.090695	0.9929785E-04	1.040763
09022011	18	0.057	0.034	0.024	0.000	0.001	0.001	0.003	0.008	0.029	0.000	0.025	304.799	0.409	NaN	1.152318	0.5440084E-04	1.325966
09022011	19	0.096	0.046	0.026	0.000	0.001	0.002	0.004	0.015	0.017	0.000	0.027	303.130	0.438	NaN	1.090025	0.9269353E-05	2.070387
09022011	20	0.129	0.056	0.031	0.000	0.001	0.002	0.006	0.021	0.006	0.001	0.029	301.621	0.472	NaN	1.063299	0.2273709E-05	2.669921
09022011	21	0.133	0.058	0.033	0.000	0.002	0.003	0.006	0.022	0.003	0.001	0.029	300.518	0.508	NaN	1.322206	0.2000791E-05	2.820097
09022011	22	0.126	0.057	0.032	0.000	0.002	0.003	0.007	0.022	0.001	0.002	0.028	299.654	0.542	NaN	1.311878	0.2090500E-05	2.797643
09022011	23	0.116	0.055	0.028	0.000	0.002	0.003	0.007	0.021	0.002	0.002	0.028	298.930	0.579	NaN	1.579157	0.2753048E-05	2.758611
09022011	24	0.109	0.050	0.024	0.001	0.002	0.002	0.006	0.019	0.005	0.002	0.026	298.285	0.619	0.3798574E-01	0.7255422	0.1067956E-05	2.832109
09032011	01	0.101	0.044	0.020	0.001	0.002	0.002	0.006	0.017	0.006	0.002	0.025	297.785	0.644	0.3443015E-01	0.8617232	0.2277658E-05	2.577879
09032011	02	0.093	0.037	0.016	0.001	0.002	0.002	0.007	0.017	0.006	0.002	0.025	297.070	0.696	0.5758715E-01	1.055945	0.1730862E-05	2.785379
09032011	03	0.091	0.031	0.013	0.001	0.002	0.002	0.007	0.017	0.004	0.002	0.025	296.755	0.713	0.6377488E-01	1.089051	0.1793642E-05	2.783313
09032011	04	0.092	0.028	0.011	0.001	0.002	0.002	0.008	0.019	0.003	0.003	0.025	296.357	0.741	0.1109851	0.9169900	0.4948547E-06	3.267887
09032011	05	0.096	0.027	0.010	0.001	0.002	0.003	0.008	0.020	0.002	0.002	0.025	296.057	0.761	0.1066522	0.7742073	0.4169268E-06	3.268797
09032011	06	0.106	0.028	0.010	0.001	0.003	0.003	0.009	0.023	0.002	0.002	0.025	295.799	0.781	0.4910368E-01	0.3271997	0.1046045E-06	3.495262
09032011	07	0.114	0.030	0.010	0.001	0.003	0.004	0.010	0.026	0.001	0.002	0.025	295.800	0.796	0.000000	0.2830677E-08	0.2319925E-18	7.086416
09032011	08	0.107	0.030	0.021	0.001	0.003	0.004	0.011	0.028	0.002	0.002	0.026	297.656	0.748	0.000000	0.2605155E-08	0.2222394E-18	7.069013
09032011	09	0.092	0.028	0.033	0.001	0.003	0.003	0.010	0.023	0.003	0.003	0.025	299.971	0.655	0.8889318E-02	0.1522358	0.4925374E-07	3.490078
09032011	10	0.083	0.029	0.043	0.000	0.002	0.002	0.007	0.015	0.007	0.003	0.023	302.126	0.578	NaN	2.142520	0.1220073E-04	2.244539
09032011	11	0.073	0.029	0.049	0.000	0.002	0.002	0.005	0.011	0.016	0.002	0.023	304.001	0.522	NaN	2.092575	0.3085366E-04	1.831374
09032011	12	0.061	0.028	0.044	0.000	0.002	0.001	0.004	0.009	0.022	0.001	0.024	305.648	0.472	NaN	1.722556	0.6778238E-04	1.405057
09032011	13	0.044	0.024	0.031	0.000	0.001	0.001	0.003	0.007	0.026	0.001	0.023	306.959	0.428	NaN	1.309056	0.1195063E-03	1.039567
09032011	14	0.041	0.020	0.026	0.000	0.001	0.001	0.003	0.006	0.027	0.001	0.022	307.542	0.403	NaN	1.092602	0.9956639E-04	1.040349
09032011	15	0.041	0.021	0.023	0.000	0.001	0.001	0.003	0.005	0.028	0.001	0.022	307.261	0.396	NaN	1.103502	0.1123107E-03	0.9923519
09032011	16	0.038	0.030	0.022	0.000	0.001	0.001	0.002	0.005	0.031	0.001	0.023	306.533	0.401	NaN	1.157017	0.1602699E-03	0.8584879
09032011	17	0.033	0.042	0.021	0.000	0.001	0.001	0.002	0.005	0.036	0.001	0.025	305.402	0.413	NaN	1.286762	0.2540496E-03	0.7045798
09032011	18	0.037	0.052	0.019	0.000	0.001	0.001	0.003	0.006	0.040	0.000	0.028	304.138	0.426	NaN	1.430687	0.1942233E-03	0.8672432
09032011	19	0.065	0.061	0.017	0.000	0.001	0.001	0.004	0.010	0.037	0.000	0.031	302.702	0.445	NaN	1.432578	0.6911059E-04	1.316574
09032011	20	0.089	0.065	0.016	0.001	0.001	0.002	0.005	0.014	0.033	0.001	0.035	301.537	0.462	0.7741153E-02	1.218902	0.5364463E-04	1.356443
09032011	21	0.088	0.060	0.013	0.001	0.002	0.002	0.005	0.016	0.033	0.001	0.038	300.669	0.489	0.1027918E-01	1.413393	0.6195806E-04	1.358165
09032011	22	0.078	0.051	0.010	0.001	0.002	0.003	0.006	0.016	0.032	0.001	0.038	300.052	0.517	0.1306409E-01	1.578954	0.5094085E-04	1.491303
09032011	23	0.059	0.042	0.009	0.002	0.002	0.002	0.005	0.015	0.033	0.001	0.036	299.524	0.547	0.1412988E-01	1.608106	0.6106156E-04	1.420547
09032011	24	0.042	0.037	0.007	0.002	0.002	0.002	0.005	0.013	0.032	0.001	0.034	298.945	0.582	0.1837426E-01	1.756348	0.6690349E-04	1.419162
09042011	01	0.034	0.031	0.006	0.002	0.002	0.002	0.005	0.012	0.030	0.001	0.031	298.249	0.623	0.1922333E-01	1.797138	0.5658897E-04	1.501850
09042011	02	0.030	0.024	0.005	0.002	0.002	0.002	0.004	0.011	0.027	0.001	0.028	297.648	0.655	0.2094179E-01	1.842866	0.5142895E-04	1.554286
09042011	03	0.028	0.018	0.005	0.002	0.002	0.001	0.004	0.010	0.024	0.001	0.026	297.179	0.680	0.2101684E-01	1.786444	0.5587772E-04	1.504751
09042011	04	0.030	0.015	0.005	0.002	0.002	0.001	0.004	0.010	0.021	0.001	0.023	296.769	0.706	0.1874208E-01	1.611490	0.4687025E-04	1.536330
09042011	05	0.036	0.016	0.005	0.001	0.002	0.001	0.004	0.010	0.016	0.001	0.022	296.392	0.731	0.1934326E-01	1.597641	0.4261433E-04	1.573923
09042011	06	0.046	0.018	0.006	0.001	0.002	0.001	0.004	0.012	0.011	0.001	0.021	296.075	0.755	0.2709299E-01	1.357451	0.1711774E-04	1.899278
09042011	07	0.053	0.020	0.006	0.001	0.002	0.002	0.004	0.013	0.007	0.001	0.021	295.892	0.778	0.4471987E-01	1.372939	0.6846032E-05	2.302212
09042011	08	0.044	0.020	0.011	0.001	0.002	0.002	0.004	0.011	0.010	0.001	0.020	296.883	0.783	0.3018332E-01	1.531665	0.1235465E-04	2.093333
09042011	09	0.032	0.030	0.019	0.001	0.001	0.001	0.003	0.009	0.014	0.001	0.019	298.372	0.757	0.1093990E-01	1.491548	0.4511157E-04	1.519349
09042011	10	0.019	0.042	0.027	0.000	0.001	0.001	0.002	0.006	0.020	0.001	0.018	299.651	0.726	NaN	2.891984	0.5006103E-02	-0.2383039
09042011	11	0.015	0.035	0.031	0.000	0.001	0.001	0.002	0.005	0.023	0.001	0.018	300.789	0.692	NaN	2.422535	0.1119108E-01	-0.6646019
09042011	12	0.008	0.021	0.032	0.000	0.001	0.001	0.002	0.005	0.032	0.001	0.023	299.970	0.694	NaN	2.560258	0.2010182E-01	-0.8949517
09042011	13	0.013	0.016	0.033	0.000	0.001	0.001	0.002	0.005	0.036	0.001	0.025	300.023	0.692	NaN	3.049519	0.1533637E-01	-0.7014914
09042011	14	0.016	0.013	0.033	0.000	0.001	0.001	0.002	0.005	0.037	0.001	0.026	300.320	0.692	NaN	3.265754	0.1312432E-01	-0.6040933
09042011	15	0.011	0.009	0.030	0.000	0.001	0.001	0.002	0.005	0.041	0.001	0.027	300.243	0.695	NaN	3.334069	0.1307687E-01	-0.5935293
09042011	16	0.013	0.007	0.026	0.000	0.001	0.001	0.002	0.005	0.041	0.001	0.027	298.615	0.752	NaN	4.174573	0.7739081E-02	-0.2680773
09042011	17	0.022	0.007	0.026	0.000	0.001	0.001	0.002	0.006	0.038	0.001	0.027	298.234	0.777	NaN	5.219093	0.2549342E-02	0.3111669
09042011	18	0.020	0.006	0.020	0.000	0.001	0.001	0.002	0.006	0.038	0.001	0.027	297.000	0.837	NaN	6.848218	0.1167248E-02	0.7684146
09042011	19	0.023	0.006	0.016	0.000	0.001	0.001	0.002	0.007	0.036	0.001	0.027	296.165	0.893	NaN	9.396071	0.3902885E-03	1.381561
09042011	20	0.020	0.005	0.012	0.000	0.001	0.001	0.002	0.007	0.034	0.001	0.026	295.890	0.910	NaN	10.18420	0.3186795E-03	1.504573
09042011	21	0.012	0.003	0.009	0.000	0.000	0.001	0.002	0.005	0.024	0.001	0.018	295.668	0.921	NaN	8.051905	0.3702580E-03	1.337394
09042011	22	0.002	0.001	0.004	0.000	0.000	0.000	0.001	0.002	0.010	0.000	0.007	295.620	0.921	NaN	2.652333	0.8163463E-03	0.5117536
09042011	23	0.005	0.001	0.003	0.000	0.000	0.000	0.001	0.002	0.007	0.000	0.006	295.628	0.916	NaN	2.354061	0.2300519E-03	1.009992
09042011	24	0.006	0.002	0.003	0.000	0.000	0.000	0.001	0.002	0.007	0.000	0.006	295.615	0.912	NaN	2.125997	0.1727276E-03	1.090201
09052011	01	0.003	0.001	0.004	0.000	0.000	0.000	0.001	0.002	0.009	0.000	0.007	295.534	0.914	NaN	2.354926	0.8318762E-03	0.4519185
09052011	02	0.002	0.001	0.004	0.000	0.000	0.000	0.001	0.002	0.010	0.000	0.007	295.486	0.914	NaN	2.355908	0.8309765E-03	0.4525695
09052011	03	0.002	0.001	0.004	0.000	0.000	0.000	0.001	0.002	0.010	0.000	0.008	295.463	0.914	0.3749329E-01	2.898505	0.1940398E-02	0.1742832
09052011	04	0.001	0.001	0.003	0.000	0.000	0.000	0.001	0.001	0.008	0.000	0.006	295.440	0.914	0.2701211E-01	1.807597	0.1455277E-02	0.9415576E-01
09052011	05	0.002	0.001	0.002	0.000	0.000	0.000	0.000	0.001	0.006	0.000	0.005	295.403	0.915	0.2947116E-01	1.632653	0.1358471E-02	0.7984366E-01
09052011	06	0.006	0.001	0.002	0.000	0.000	0.000	0.000	0.001	0.003	0.000	0.003	295.564	0.906	NaN	1.191665	0.1134264E-03	1.021440
09052011	07	0.016	0.003	0.003	0.000	0.000	0.000	0.001	0.003	0.000	0.000	0.003	295.486	0.919	NaN	0.9517585	0.3051350E-04	1.494035
09052011	08	0.017	0.002	0.004	0.000	0.001	0.001	0.001	0.003	0.001	0.000	0.004	295.351	0.948	NaN	2.835385	0.2173381E-04	2.115476
09052011	09	0.009	0.001	0.003	0.000	0.000	0.000	0.000	0.000	0.003	0.000	0.002	295.919	0.950	0.6202102E-02	1.324503	0.3610843E-04	1.564444
09052011	10	0.009	0.002	0.005	0.000	0.000	0.000	0.000	0.000	0.003	0.000	0.002	297.452	0.904	0.1594841E-02	0.6557378	0.4884208E-04	1.127936
09052011	11	0.012	0.002	0.009	0.000	0.000	0.000	0.000	0.000	0.003	0.000	0.002	298.342	0.878	0.1473904E-02	0.5509642	0.4059921E-04	1.132606
09052011	12	0.012	0.002	0.011	0.000	0.000	0.000	0.000	0.000	0.003	0.000	0.002	298.313	0.887	0.1656353E-02	0.5988024	0.3929500E-04	1.182946
09052011	13	0.008	0.001	0.012	0.000	0.000	0.000	0.000	0.000	0.003	0.000	0.002	299.459	0.866	0.6368756E-03	0.5115089	0.7284820E-04	0.8464344
09052011	14	0.006	0.001	0.006	0.000	0.000	0.000	0.000	0.000	0.002	0.000	0.001	299.650	0.862	0.2338290E-03	0.2386635	0.4523167E-04	0.7223433
09052011	15	0.007	0.000	0.007	0.000	0.000	0.000	0.000	0.000	0.002	0.000	0.001	299.340	0.874	0.3224611E-03	0.2557545	0.3661392E-04	0.8441771
09052011	16	0.007	0.000	0.007	0.000	0.000	0.000	0.000	0.000	0.001	0.000	0.001	298.479	0.895	0.5173683E-03	0.3278688	0.3524070E-04	0.9686557
09052011	17	0.008	0.000	0.005	0.000	0.000	0.000	0.000	0.000	0.001	0.000	0.001	297.654	0.928	0.1112401E-02	0.4672897	0.2561749E-04	1.261050
09052011	18	0.004	0.000	0.001	0.000	0.000	0.000	0.000	0.000	0.001	0.000	0.001	296.983	0.951	0.9949207E-03	0.6622517	0.5182970E-04	1.106444
09052011	19	0.008	0.000	0.001	0.000	0.000	0.000	0.000	0.000	0.001	0.000	0.001	296.773	0.960	0.3266215E-02	0.8403361	0.2202958E-04	1.581447
09052011	20	0.010	0.000	0.001	0.000	0.000	0.000	0.000	0.000	0.000	0.000	0.001	296.465	0.969	0.6428421E-02	1.149425	0.1909042E-04	1.779665
09052011	21	0.007	0.000	0.001	0.000	0.000	0.000	0.000	0.000	0.000	0.000	0.001	296.437	0.959	0.2552688E-02	0.8403361	0.2985725E-04	1.449403
09052011	22	0.006	0.000	0.001	0.000	0.000	0.000	0.000	0.000	0.000	0.000	0.001	296.346	0.955	0.2119839E-02	0.8403361	0.3681051E-04	1.358481
09052011	23	0.004	0.000	0.001	0.000	0.000	0.000	0.000	0.000	0.001	0.000	0.001	296.353	0.944	0.8447766E-03	0.5464481	0.5086634E-04	1.031118
09052011	24	0.001	0.000	0.002	0.000	0.000	0.000	0.000	0.000	0.003	0.000	0.002	296.020	0.935	0.6887913E-03	1.092896	0.3150181E-03	0.5402434
09062011	01	0.001	0.001	0.003	0.000	0.000	0.000	0.000	0.000	0.004	0.000	0.003	295.616	0.932	0.3100097E-02	1.360147	0.2630088E-03	0.7136155
09062011	02	0.001	0.002	0.004	0.000	0.001	0.000	0.000	0.000	0.006	0.000	0.005	295.194	0.930	0.000000	2.254101	0.1450319E-02	0.1915098
09062011	03	0.001	0.002	0.004	0.000	0.001	0.000	0.000	0.000	0.007	0.000	0.006	294.422	0.940	0.000000	3.178027	0.1663400E-02	0.2811610
09062011	04	0.001	0.003	0.004	0.000	0.000	0.000	0.000	0.000	0.009	0.000	0.007	293.734	0.948	0.7281125E-02	4.455363	0.1113473E-02	0.6022036
09062011	05	0.001	0.003	0.005	0.000	0.000	0.000	0.000	0.000	0.011	0.000	0.007	293.001	0.948	0.1762450E-01	4.518401	0.6266368E-03	0.8579689
09062011	06	0.005	0.004	0.005	0.000	0.000	0.000	0.000	0.000	0.011	0.000	0.006	292.136	0.946	0.2264833E-01	3.973510	0.1457696E-03	1.435507
09062011	07	0.005	0.007	0.007	0.000	0.000	0.000	0.000	0.000	0.011	0.000	0.006	291.232	0.952	0.2679402E-01	3.973510	0.1382778E-03	1.458422
09062011	08	0.002	0.011	0.010	0.000	0.001	0.000	0.000	0.000	0.015	0.000	0.009	290.975	0.929	0.3200769E-04	4.206704	0.1560363E-02	0.4307162
09062011	09	0.002	0.015	0.010	0.000	0.001	0.000	0.000	0.000	0.017	0.000	0.009	290.701	0.917	0.1543516E-01	3.676857	0.3313093E-03	1.045243
09062011	10	0.003	0.019	0.012	0.000	0.001	0.000	0.000	0.000	0.015	0.000	0.008	290.674	0.904	0.1300019E-01	2.629665	0.2493527E-03	1.023086
09062011	11	0.007	0.020	0.016	0.000	0.001	0.000	0.000	0.000	0.014	0.000	0.008	290.775	0.899	0.2188367E-01	2.629665	0.1438954E-03	1.261853
09062011	12	0.016	0.017	0.019	0.000	0.001	0.001	0.000	0.000	0.011	0.001	0.007	290.788	0.884	NaN	4.977062	0.2441681E-02	0.3092842
09062011	13	0.019	0.017	0.025	0.000	0.001	0.001	0.000	0.000	0.012	0.002	0.007	290.805	0.873	NaN	5.286873	0.4676768E-02	0.5325304E-01
09062011	14	0.020	0.019	0.033	0.000	0.001	0.001	0.000	0.000	0.016	0.002	0.009	290.645	0.869	NaN	5.993825	0.1034629E-01	-0.2370805
09062011	15	0.023	0.021	0.033	0.000	0.001	0.001	0.000	0.000	0.019	0.004	0.010	290.375	0.872	NaN	6.942194	0.8331289E-02	-0.7921547E-01
09062011	16	0.027	0.022	0.028	0.000	0.001	0.001	0.000	0.000	0.020	0.004	0.010	290.062	0.879	NaN	8.409194	0.1473416E-02	0.7564290
09062011	17	0.029	0.022	0.023	0.000	0.001	0.001	0.000	0.000	0.019	0.004	0.010	289.731	0.888	NaN	8.719323	0.2809132E-03	1.491911
09062011	18	0.028	0.020	0.017	0.000	0.001	0.001	0.000	0.000	0.016	0.003	0.008	289.406	0.900	NaN	7.460033	0.8826648E-04	1.926945
09062011	19	0.027	0.019	0.012	0.000	0.001	0.001	0.001	0.000	0.011	0.002	0.007	289.217	0.909	NaN	6.369517	0.5141043E-04	2.093055
09062011	20	0.024	0.016	0.010	0.000	0.001	0.001	0.001	0.001	0.008	0.001	0.005	289.108	0.914	NaN	4.464814	0.2583113E-04	2.237660
09062011	21	0.021	0.013	0.010	0.000	0.001	0.001	0.001	0.001	0.006	0.001	0.005	288.984	0.911	NaN	4.457751	0.3604277E-04	2.092298
09062011	22	0.018	0.011	0.010	0.000	0.002	0.001	0.001	0.001	0.006	0.001	0.005	288.855	0.908	NaN	4.460001	0.4012148E-04	2.045958
09062011	23	0.015	0.010	0.011	0.001	0.002	0.001	0.001	0.001	0.006	0.001	0.006	288.733	0.906	0.1039212	2.146065	0.1476057E-04	2.162540
09062011	24	0.012	0.010	0.012	0.001	0.002	0.001	0.001	0.002	0.008	0.001	0.007	288.634	0.906	0.9966499E-01	2.157662	0.1581507E-04	2.134912
09072011	01	0.011	0.011	0.013	0.001	0.003	0.001	0.001	0.002	0.011	0.002	0.010	288.389	0.911	0.1067013	3.319508	0.4050719E-04	1.913542
09072011	02	0.010	0.011	0.014	0.001	0.003	0.001	0.002	0.003	0.016	0.002	0.013	288.416	0.913	0.1315905	4.172809	0.4931078E-04	1.927487
09072011	03	0.011	0.013	0.015	0.001	0.003	0.001	0.002	0.003	0.021	0.003	0.015	288.608	0.892	0.1266248	4.072733	0.5818383E-04	1.845084
09072011	04	0.013	0.018	0.019	0.001	0.003	0.001	0.002	0.003	0.025	0.004	0.017	288.736	0.885	0.1489742	4.916867	0.6872816E-04	1.854554
09072011	05	0.019	0.024	0.020	0.001	0.003	0.001	0.002	0.003	0.030	0.006	0.019	288.849	0.885	0.2156231	5.999975	0.6184613E-04	1.986837
09072011	06	0.029	0.029	0.018	0.001	0.003	0.001	0.002	0.003	0.035	0.009	0.020	288.992	0.892	0.3215100	6.993186	0.4482088E-04	2.193195
09072011	07	0.039	0.031	0.014	0.001	0.003	0.002	0.002	0.003	0.039	0.012	0.021	289.142	0.902	0.4601288	8.871631	0.3368370E-04	2.420584
09072011	08	0.042	0.028	0.013	0.002	0.003	0.002	0.002	0.004	0.043	0.013	0.023	289.447	0.903	0.4802617	9.427441	0.3339301E-04	2.450738
09072011	09	0.044	0.024	0.015	0.001	0.003	0.002	0.002	0.005	0.044	0.013	0.025	290.079	0.892	0.4233189	8.610259	0.3566954E-04	2.382719
09072011	10	0.051	0.024	0.019	0.001	0.003	0.002	0.004	0.010	0.034	0.011	0.026	291.079	0.850	0.2850452	4.893031	0.2087433E-04	2.369965
09072011	11	0.047	0.037	0.031	0.001	0.003	0.002	0.004	0.012	0.026	0.009	0.026	291.928	0.816	0.1697998	3.508087	0.2024538E-04	2.238744
09072011	12	0.031	0.071	0.053	0.000	0.003	0.002	0.003	0.009	0.027	0.006	0.024	293.088	0.760	NaN	5.238656	0.1624840E-01	-0.4915907
09072011	13	0.018	0.082	0.074	0.000	0.002	0.001	0.002	0.006	0.031	0.003	0.024	293.452	0.748	NaN	3.966144	0.5574980E-01	-1.147875
09072011	14	0.015	0.063	0.087	0.000	0.002	0.001	0.002	0.006	0.033	0.003	0.025	294.084	0.739	NaN	3.728516	0.7259026E-01	-1.289342
09072011	15	0.012	0.046	0.089	0.000	0.002	0.001	0.002	0.005	0.035	0.002	0.025	293.880	0.737	NaN	3.654617	0.7680780E-01	-1.322563
09072011	16	0.015	0.037	0.079	0.000	0.002	0.001	0.002	0.006	0.034	0.002	0.025	293.408	0.756	NaN	4.133706	0.6185582E-01	-1.175041
09072011	17	0.023	0.032	0.062	0.000	0.002	0.001	0.002	0.007	0.033	0.003	0.025	293.064	0.770	NaN	4.911492	0.3468037E-01	-0.8488703
09072011	18	0.028	0.030	0.047	0.000	0.002	0.001	0.003	0.009	0.032	0.004	0.027	292.722	0.779	NaN	5.577925	0.1498732E-01	-0.4292513
09072011	19	0.029	0.026	0.034	0.000	0.002	0.001	0.003	0.010	0.032	0.003	0.028	292.223	0.807	NaN	6.617029	0.2960464E-02	0.3493034
09072011	20	0.027	0.021	0.024	0.001	0.002	0.001	0.003	0.010	0.034	0.003	0.029	291.666	0.840	0.1166540	4.438327	0.7140428E-04	1.793495
09072011	21	0.024	0.016	0.017	0.001	0.002	0.001	0.003	0.010	0.035	0.003	0.030	291.351	0.859	0.1297674	5.174456	0.8280365E-04	1.795815
09072011	22	0.015	0.024	0.017	0.001	0.002	0.001	0.003	0.009	0.039	0.003	0.031	291.214	0.863	0.9536391E-01	5.516137	0.1430697E-03	1.586087
09072011	23	0.006	0.031	0.022	0.001	0.002	0.001	0.003	0.008	0.047	0.003	0.033	290.992	0.859	0.6605083E-01	6.136064	0.2851185E-03	1.332864
09072011	24	0.003	0.030	0.023	0.001	0.002	0.001	0.003	0.007	0.049	0.002	0.035	290.643	0.866	0.4289746E-03	8.700288	0.2903023E-02	0.4766831
09082011	01	0.003	0.027	0.020	0.001	0.002	0.001	0.004	0.009	0.051	0.002	0.035	290.394	0.874	0.9212494E-03	11.75747	0.3372670E-02	0.5423402
09082011	02	0.002	0.033	0.025	0.001	0.002	0.001	0.003	0.008	0.047	0.002	0.036	290.153	0.880	0.2595782E-03	7.710442	0.2527829E-02	0.4843316
09082011	03	0.001	0.031	0.027	0.001	0.001	0.001	0.002	0.006	0.036	0.002	0.037	289.916	0.883	0.000000	8.386224	0.6386959E-02	0.1182723
09082011	04	0.000	0.029	0.027	0.000	0.001	0.001	0.002	0.005	0.033	0.001	0.038	289.655	0.886	0.4848242E-02	9.964237	0.8508836E-02	0.6857391E-01
09082011	05	0.000	0.027	0.028	0.000	0.001	0.001	0.002	0.004	0.029	0.001	0.039	289.642	0.879	0.2878010E-02	10.19528	0.1116564E-01	-0.3948471E-01
09082011	06	0.000	0.023	0.024	0.000	0.001	0.001	0.002	0.004	0.035	0.001	0.040	289.647	0.864	0.2725840E-02	8.742105	0.9179029E-02	-0.2118070E-01
09082011	07	0.001	0.021	0.021	0.000	0.001	0.001	0.002	0.006	0.046	0.001	0.037	289.429	0.866	0.1409304E-01	7.673162	0.4951468E-02	0.1902404
09082011	08	0.002	0.018	0.020	0.000	0.001	0.001	0.002	0.007	0.047	0.001	0.033	289.634	0.849	0.5897051E-01	6.730142	0.3278868E-02	0.3123003
09082011	09	0.008	0.016	0.021	0.001	0.001	0.001	0.002	0.007	0.045	0.002	0.031	290.523	0.812	0.5028063E-01	4.413119	0.2941289E-03	1.176208
09082011	10	0.008	0.016	0.028	0.000	0.001	0.001	0.002	0.007	0.041	0.001	0.029	291.865	0.765	NaN	4.172081	0.1496435E-01	-0.5547050
09082011	11	0.001	0.014	0.041	0.000	0.001	0.001	0.002	0.005	0.037	0.001	0.029	294.130	0.698	0.2588391E-02	2.704325	0.4060413E-02	-0.1765113
09082011	12	0.001	0.014	0.052	0.000	0.001	0.001	0.001	0.004	0.035	0.000	0.030	294.516	0.653	0.3737807E-03	2.278706	0.7541758E-02	-0.5197843
09082011	13	0.001	0.018	0.061	0.000	0.001	0.001	0.002	0.005	0.039	0.000	0.032	294.940	0.634	0.6747842E-03	2.290565	0.6145893E-02	-0.4286425
09082011	14	0.001	0.024	0.066	0.000	0.001	0.001	0.002	0.006	0.045	0.000	0.034	295.429	0.621	0.1891434E-02	2.431908	0.4752049E-02	-0.2909338
09082011	15	0.003	0.030	0.058	0.000	0.001	0.001	0.002	0.006	0.051	0.000	0.036	295.199	0.622	0.9307206E-02	2.740398	0.3931491E-02	-0.1567437
09082011	16	0.012	0.034	0.049	0.000	0.001	0.001	0.002	0.008	0.055	0.001	0.037	294.846	0.632	NaN	3.326036	0.3289456E-01	-0.9951970
09082011	17	0.016	0.032	0.043	0.000	0.001	0.001	0.003	0.008	0.054	0.002	0.038	294.926	0.643	NaN	3.596186	0.2512483E-01	-0.8442610
09082011	18	0.010	0.029	0.043	0.000	0.001	0.001	0.002	0.007	0.059	0.002	0.038	294.417	0.648	NaN	3.659570	0.2945143E-01	-0.9056763
09082011	19	0.013	0.023	0.033	0.000	0.001	0.001	0.003	0.008	0.063	0.001	0.042	293.826	0.659	NaN	4.160243	0.1603228E-01	-0.5858766
09082011	20	0.005	0.017	0.028	0.000	0.001	0.001	0.003	0.009	0.074	0.001	0.047	293.374	0.674	0.4559910E-01	5.960331	0.5035199E-02	0.7325370E-01
09082011	21	0.005	0.013	0.025	0.000	0.001	0.001	0.003	0.010	0.077	0.001	0.049	292.783	0.691	0.5479842E-01	6.696406	0.5082973E-02	0.1197240
09082011	22	0.013	0.011	0.024	0.000	0.001	0.001	0.003	0.010	0.073	0.002	0.050	291.796	0.726	NaN	5.972474	0.1010017E-01	-0.2281743
09082011	23	0.017	0.011	0.023	0.000	0.001	0.001	0.004	0.012	0.072	0.003	0.051	290.990	0.763	NaN	7.005588	0.5338076E-02	0.1180599
09082011	24	0.015	0.012	0.024	0.001	0.001	0.001	0.004	0.013	0.074	0.003	0.053	290.304	0.798	0.1131353	7.119018	0.3421927E-03	1.318149
09092011	01	0.010	0.012	0.025	0.001	0.001	0.001	0.004	0.013	0.078	0.003	0.053	289.625	0.833	0.1378955	8.366606	0.3483541E-03	1.380528
09092011	02	0.010	0.012	0.025	0.001	0.002	0.001	0.005	0.013	0.078	0.005	0.054	289.064	0.860	0.1778345	10.50909	0.3497468E-03	1.477811
09092011	03	0.012	0.013	0.024	0.001	0.002	0.001	0.005	0.014	0.077	0.007	0.053	288.728	0.875	0.2569934	12.16776	0.2510519E-03	1.685447
09092011	04	0.013	0.014	0.025	0.001	0.002	0.002	0.005	0.015	0.077	0.010	0.053	288.477	0.886	0.3271206	13.75068	0.2010033E-03	1.835121
09092011	05	0.018	0.017	0.023	0.001	0.002	0.002	0.006	0.017	0.079	0.017	0.053	288.244	0.898	0.4623552	16.23755	0.1360285E-03	2.076891
09092011	06	0.029	0.022	0.017	0.002	0.002	0.003	0.007	0.020	0.083	0.028	0.053	288.040	0.908	0.6679301	20.49667	0.7686314E-04	2.425965
09092011	07	0.044	0.028	0.011	0.003	0.003	0.004	0.008	0.024	0.083	0.039	0.053	287.930	0.917	0.8103038	25.37388	0.4866924E-04	2.717132
09092011	08	0.038	0.034	0.022	0.003	0.003	0.004	0.008	0.025	0.081	0.042	0.052	289.284	0.875	0.6139613	15.35003	0.4634434E-04	2.520113
09092011	09	0.016	0.051	0.056	0.001	0.002	0.002	0.006	0.017	0.070	0.016	0.050	291.631	0.784	0.1247697	6.010379	0.1461454E-03	1.614117
09092011	10	0.002	0.082	0.069	0.000	0.002	0.002	0.004	0.012	0.062	0.002	0.050	293.903	0.693	0.1287407E-01	4.333128	0.4493076E-02	-0.1574223E-01
09092011	11	0.000	0.069	0.075	0.000	0.001	0.001	0.003	0.009	0.052	0.001	0.053	294.988	0.628	0.2394915E-03	3.650680	0.5531513E-02	-0.1804701
09092011	12	0.000	0.061	0.078	0.000	0.001	0.001	0.003	0.008	0.050	0.001	0.053	295.789	0.592	0.1364350E-03	3.269147	0.3107353E-02	0.2204387E-01
09092011	13	0.000	0.058	0.072	0.000	0.001	0.001	0.003	0.008	0.049	0.001	0.052	297.619	0.541	0.7992983E-04	2.666709	0.2166949E-02	0.9012693E-01
09092011	14	0.000	0.049	0.070	0.000	0.001	0.001	0.002	0.007	0.046	0.000	0.051	298.802	0.514	0.3933907E-04	2.443403	0.1335364E-02	0.2623955
09092011	15	0.001	0.045	0.066	0.000	0.001	0.001	0.002	0.007	0.048	0.000	0.049	298.475	0.513	0.5859137E-04	2.282794	0.2250547E-02	0.6178588E-02
09092011	16	0.001	0.048	0.062	0.000	0.001	0.001	0.003	0.008	0.057	0.000	0.048	297.610	0.523	0.1991987E-03	2.222125	0.1229279E-01	-0.7428820
09092011	17	0.014	0.052	0.062	0.000	0.001	0.002	0.004	0.012	0.065	0.001	0.047	297.402	0.533	NaN	2.959238	0.4155189E-01	-1.147411
09092011	18	0.017	0.054	0.064	0.000	0.001	0.002	0.004	0.012	0.063	0.001	0.046	296.870	0.540	NaN	3.062773	0.4064900E-01	-1.122935
09092011	19	0.054	0.052	0.054	0.000	0.001	0.002	0.005	0.018	0.047	0.002	0.046	295.654	0.552	NaN	3.607692	0.1377914E-02	0.4180074
09092011	20	0.095	0.051	0.049	0.000	0.002	0.003	0.007	0.026	0.026	0.003	0.045	294.276	0.590	NaN	3.418296	0.2083541E-04	2.215008
09092011	21	0.101	0.045	0.042	0.000	0.002	0.003	0.007	0.028	0.016	0.005	0.041	293.109	0.634	NaN	3.222199	0.9855102E-05	2.514491
09092011	22	0.093	0.036	0.033	0.001	0.002	0.003	0.007	0.027	0.013	0.005	0.038	292.161	0.675	0.1518378	1.622632	0.3628129E-05	2.650537
09092011	23	0.079	0.029	0.027	0.001	0.002	0.003	0.007	0.024	0.014	0.005	0.035	291.305	0.719	0.1866183	1.881675	0.4129801E-05	2.658615
09092011	24	0.067	0.024	0.022	0.001	0.002	0.002	0.006	0.020	0.020	0.006	0.033	290.536	0.767	0.2119511	2.527749	0.9947326E-05	2.405028
09102011	01	0.058	0.024	0.019	0.001	0.002	0.002	0.005	0.017	0.027	0.007	0.032	289.813	0.818	0.2937243	3.782753	0.1533200E-04	2.392209
09102011	02	0.050	0.025	0.016	0.001	0.002	0.002	0.005	0.015	0.032	0.008	0.032	289.257	0.848	0.3613033	5.121022	0.2077880E-04	2.391736
09102011	03	0.045	0.028	0.015	0.001	0.002	0.002	0.005	0.014	0.035	0.009	0.031	288.808	0.867	0.4241312	6.177246	0.2184879E-04	2.451368
09102011	04	0.045	0.032	0.014	0.001	0.002	0.002	0.005	0.014	0.037	0.012	0.031	288.443	0.879	0.4862959	7.186724	0.2215843E-04	2.510992
09102011	05	0.049	0.036	0.013	0.002	0.002	0.002	0.005	0.014	0.040	0.015	0.031	288.134	0.887	0.5751999	8.756169	0.2148504E-04	2.610178
09102011	06	0.057	0.041	0.012	0.002	0.002	0.002	0.005	0.016	0.043	0.021	0.031	287.900	0.891	0.6504985	9.370378	0.1701194E-04	2.741003
09102011	07	0.062	0.044	0.011	0.003	0.002	0.002	0.006	0.017	0.047	0.028	0.031	287.720	0.898	0.7365512	12.08762	0.1741610E-04	2.841390
09102011	08	0.062	0.041	0.018	0.002	0.002	0.002	0.006	0.019	0.045	0.031	0.031	289.306	0.838	0.4896595	5.872713	0.1088238E-04	2.732115
09102011	09	0.047	0.047	0.039	0.001	0.002	0.002	0.005	0.014	0.034	0.013	0.030	292.287	0.715	0.1071966	2.436772	0.2321541E-04	2.021039
09102011	10	0.047	0.049	0.055	0.000	0.002	0.002	0.005	0.013	0.028	0.006	0.029	295.002	0.601	NaN	3.334763	0.4522176E-02	-0.1322824
09102011	11	0.037	0.081	0.068	0.000	0.001	0.001	0.004	0.011	0.033	0.004	0.030	297.435	0.487	NaN	1.983076	0.3054584E-01	-1.187613
09102011	12	0.028	0.089	0.062	0.000	0.001	0.001	0.004	0.009	0.035	0.002	0.029	298.849	0.438	NaN	1.534151	0.3236441E-01	-1.324200
09102011	13	0.029	0.072	0.060	0.000	0.001	0.001	0.004	0.009	0.033	0.001	0.028	300.372	0.400	NaN	1.269114	0.2794127E-01	-1.342745
09102011	14	0.032	0.064	0.063	0.000	0.001	0.001	0.004	0.009	0.032	0.001	0.028	301.307	0.377	NaN	1.186662	0.2897382E-01	-1.387679
09102011	15	0.034	0.058	0.061	0.000	0.001	0.001	0.004	0.009	0.030	0.001	0.027	301.239	0.376	NaN	1.163229	0.2461366E-01	-1.325511
09102011	16	0.036	0.052	0.056	0.000	0.001	0.001	0.004	0.008	0.028	0.000	0.026	300.557	0.389	NaN	1.215813	0.1835983E-01	-1.179002
09102011	17	0.038	0.049	0.052	0.000	0.001	0.001	0.004	0.008	0.027	0.000	0.025	299.534	0.406	NaN	1.315565	0.1131078E-01	-0.9343802
09102011	18	0.048	0.049	0.048	0.000	0.001	0.001	0.004	0.009	0.025	0.000	0.026	298.464	0.422	NaN	1.479025	0.1486155E-02	-0.2088833E-02
09102011	19	0.091	0.054	0.046	0.000	0.001	0.002	0.005	0.015	0.013	0.001	0.027	296.777	0.447	NaN	1.463687	0.7742593E-05	2.276562
09102011	20	0.125	0.058	0.047	0.000	0.002	0.003	0.007	0.019	0.004	0.002	0.027	295.377	0.477	NaN	1.497437	0.1881608E-05	2.900819
09102011	21	0.126	0.056	0.044	0.000	0.002	0.003	0.007	0.021	0.003	0.003	0.027	293.907	0.530	NaN	1.585867	0.1716642E-05	2.965587
09102011	22	0.117	0.050	0.037	0.000	0.002	0.003	0.007	0.021	0.002	0.002	0.026	292.769	0.581	NaN	1.579135	0.1802716E-05	2.942492
09102011	23	0.106	0.043	0.029	0.000	0.002	0.003	0.007	0.021	0.002	0.003	0.025	291.822	0.632	NaN	1.555812	0.1837242E-05	2.927791
09102011	24	0.096	0.037	0.023	0.000	0.002	0.003	0.007	0.020	0.003	0.003	0.024	290.965	0.688	NaN	1.761945	0.2345925E-05	2.875678
09112011	01	0.086	0.033	0.016	0.001	0.002	0.002	0.007	0.018	0.004	0.004	0.023	290.340	0.732	0.1813201	0.8731830	0.6804162E-06	3.108331
09112011	02	0.076	0.030	0.011	0.001	0.002	0.002	0.006	0.016	0.005	0.004	0.022	289.619	0.790	0.3044569	1.499866	0.1051752E-05	3.154139
09112011	03	0.068	0.027	0.009	0.001	0.002	0.002	0.006	0.015	0.006	0.004	0.021	289.220	0.813	0.3355591	1.629465	0.1135503E-05	3.156857
09112011	04	0.070	0.026	0.008	0.001	0.002	0.002	0.005	0.014	0.007	0.004	0.021	288.907	0.826	0.3360175	1.975018	0.2284069E-05	2.936862
09112011	05	0.076	0.027	0.008	0.001	0.002	0.002	0.006	0.015	0.007	0.005	0.020	288.618	0.839	0.3884903	1.770733	0.1180436E-05	3.176111
09112011	06	0.085	0.029	0.009	0.001	0.002	0.002	0.006	0.016	0.007	0.006	0.020	288.364	0.852	0.3925284	1.758978	0.1219539E-05	3.159065
09112011	07	0.092	0.031	0.012	0.001	0.002	0.002	0.006	0.018	0.006	0.006	0.020	288.188	0.863	0.3199978	1.392358	0.9715029E-06	3.156307
09112011	08	0.088	0.032	0.018	0.001	0.002	0.002	0.007	0.019	0.005	0.005	0.020	290.026	0.796	0.6534684E-01	0.3048931	0.1959820E-06	3.191931
09112011	09	0.080	0.032	0.023	0.000	0.002	0.002	0.006	0.015	0.006	0.006	0.020	293.260	0.664	NaN	1.862469	0.4020632E-05	2.665795
09112011	10	0.083	0.037	0.037	0.000	0.002	0.002	0.005	0.014	0.006	0.004	0.020	296.451	0.542	NaN	1.573742	0.4364151E-05	2.557034
09112011	11	0.079	0.061	0.043	0.000	0.002	0.002	0.005	0.011	0.014	0.002	0.022	299.220	0.439	NaN	1.331604	0.8635783E-05	2.188073
09112011	12	0.063	0.050	0.033	0.000	0.001	0.001	0.005	0.009	0.019	0.001	0.022	300.587	0.394	NaN	0.9553568	0.1566221E-04	1.785313
09112011	13	0.054	0.038	0.028	0.000	0.001	0.001	0.004	0.008	0.019	0.001	0.021	302.160	0.356	NaN	0.8001696	0.2216577E-04	1.557499
09112011	14	0.051	0.032	0.025	0.000	0.001	0.001	0.004	0.007	0.018	0.000	0.020	302.978	0.340	NaN	0.6976046	0.2424907E-04	1.458914
09112011	15	0.046	0.030	0.022	0.000	0.001	0.001	0.004	0.007	0.016	0.000	0.019	302.616	0.349	NaN	0.6640397	0.2541193E-04	1.417156
09112011	16	0.045	0.030	0.021	0.000	0.001	0.001	0.004	0.007	0.015	0.000	0.018	301.805	0.369	NaN	0.6726113	0.2157913E-04	1.493730
09112011	17	0.049	0.031	0.020	0.000	0.001	0.001	0.004	0.007	0.014	0.000	0.018	300.649	0.394	NaN	0.7228862	0.2005100E-04	1.556934
09112011	18	0.054	0.030	0.018	0.000	0.001	0.001	0.004	0.008	0.014	0.000	0.019	299.326	0.425	NaN	0.8264078	0.1868896E-04	1.645609
09112011	19	0.080	0.034	0.015	0.000	0.001	0.002	0.006	0.013	0.006	0.000	0.021	297.598	0.472	NaN	0.7465572	0.3025535E-05	2.392261
09112011	20	0.098	0.036	0.014	0.000	0.002	0.002	0.007	0.017	0.001	0.001	0.023	295.881	0.535	NaN	0.8047228	0.1269149E-05	2.802134
09112011	21	0.095	0.031	0.015	0.001	0.002	0.002	0.006	0.016	0.007	0.001	0.025	294.717	0.578	0.4493743E-01	0.7873601	0.3398427E-05	2.364895
09112011	22	0.090	0.025	0.015	0.001	0.002	0.002	0.006	0.014	0.012	0.001	0.025	293.810	0.622	0.6280452E-01	1.089229	0.6592642E-05	2.218060
09112011	23	0.087	0.019	0.014	0.001	0.001	0.002	0.005	0.013	0.013	0.001	0.024	293.178	0.652	0.7087547E-01	1.202599	0.8144029E-05	2.169281
09112011	24	0.084	0.017	0.012	0.001	0.001	0.002	0.005	0.013	0.010	0.001	0.022	292.424	0.705	0.1003119	1.240400	0.4490259E-05	2.441290
09132011	01	0.092	0.012	0.026	0.000	0.001	0.001	0.004	0.012	0.002	0.002	0.014	292.032	0.810	NaN	3.299977	0.8380784E-05	2.595226
09132011	02	0.078	0.010	0.023	0.000	0.001	0.001	0.003	0.011	0.001	0.001	0.012	291.508	0.843	NaN	3.398828	0.1212581E-04	2.447618
09132011	03	0.067	0.009	0.021	0.000	0.001	0.001	0.003	0.011	0.001	0.001	0.011	291.132	0.860	NaN	3.505450	0.2083010E-04	2.226052
09132011	04	0.062	0.009	0.018	0.000	0.001	0.001	0.003	0.011	0.000	0.001	0.010	290.971	0.856	NaN	3.027296	0.1885585E-04	2.205609
09132011	05	0.065	0.010	0.017	0.000	0.001	0.001	0.003	0.011	0.001	0.001	0.009	290.699	0.868	NaN	3.154871	0.1723991E-04	2.262447
09132011	06	0.076	0.012	0.010	0.001	0.001	0.002	0.004	0.013	0.001	0.006	0.010	290.456	0.879	0.9775883E-01	0.3442489	0.4301322E-06	2.903270
09132011	07	0.086	0.014	0.000	0.003	0.001	0.003	0.004	0.016	0.000	0.018	0.010	290.251	0.889	NaN	5.176810	0.3593065E-09	7.158597
09132011	08	0.064	0.014	0.000	0.003	0.001	0.003	0.004	0.017	0.007	0.028	0.010	292.245	0.823	NaN	4.645455	0.4379189E-05	3.025635
09132011	09	0.042	0.013	0.030	0.001	0.001	0.002	0.003	0.012	0.002	0.004	0.010	295.277	0.709	0.000000	0.1737447E-08	0.1000164E-13	2.239840
09132011	10	0.034	0.020	0.041	0.000	0.001	0.001	0.002	0.008	0.004	0.001	0.011	298.065	0.598	NaN	1.603554	0.3903702E-02	-0.3863932
09132011	11	0.026	0.047	0.052	0.000	0.001	0.001	0.002	0.005	0.015	0.000	0.015	299.999	0.526	NaN	1.395530	0.2423451E-01	-1.239695
09132011	12	0.020	0.046	0.051	0.000	0.000	0.001	0.002	0.004	0.022	0.000	0.017	301.566	0.474	NaN	1.149312	0.2953663E-01	-1.409923
09132011	13	0.016	0.034	0.046	0.000	0.000	0.000	0.002	0.004	0.026	0.000	0.018	303.178	0.427	NaN	0.9273437	0.2879987E-01	-1.492150
09132011	14	0.012	0.023	0.040	0.000	0.000	0.000	0.001	0.003	0.029	0.000	0.019	303.913	0.403	NaN	0.8634450	0.2901334E-01	-1.526363
09132011	15	0.011	0.017	0.039	0.000	0.000	0.000	0.001	0.003	0.032	0.000	0.020	303.254	0.401	NaN	0.9109432	0.2790164E-01	-1.486138
09132011	16	0.018	0.017	0.041	0.000	0.000	0.001	0.001	0.004	0.031	0.000	0.021	301.966	0.420	NaN	1.139187	0.2095295E-01	-1.264650
09132011	17	0.028	0.016	0.041	0.000	0.000	0.001	0.002	0.004	0.029	0.000	0.020	301.577	0.436	NaN	1.323779	0.9128763E-02	-0.8385965
09132011	18	0.041	0.016	0.038	0.000	0.000	0.001	0.002	0.006	0.026	0.000	0.020	300.518	0.454	NaN	1.413077	0.1610133E-03	0.9433042
09132011	19	0.096	0.025	0.041	0.000	0.001	0.002	0.004	0.015	0.009	0.000	0.022	298.656	0.485	NaN	1.329937	0.3659133E-05	2.560453
09132011	20	0.127	0.030	0.041	0.000	0.001	0.002	0.005	0.021	0.001	0.001	0.023	296.887	0.536	NaN	1.176082	0.1320910E-05	2.949565
09132011	21	0.123	0.028	0.034	0.000	0.001	0.002	0.005	0.020	0.001	0.001	0.022	295.593	0.585	NaN	1.262945	0.1546167E-05	2.912128
09132011	22	0.113	0.023	0.024	0.000	0.001	0.002	0.004	0.016	0.002	0.002	0.020	294.511	0.636	NaN	1.532662	0.2238130E-05	2.835561
09132011	23	0.100	0.018	0.018	0.001	0.001	0.001	0.004	0.013	0.006	0.001	0.019	293.696	0.677	0.5330396E-01	0.7286565	0.2687749E-05	2.433134
09132011	24	0.088	0.014	0.013	0.001	0.001	0.001	0.003	0.010	0.009	0.001	0.017	292.987	0.719	0.6551600E-01	0.9719470	0.5555682E-05	2.242905
09142011	01	0.076	0.011	0.010	0.001	0.001	0.001	0.003	0.009	0.012	0.001	0.017	292.340	0.764	0.8564818E-01	1.270481	0.7767958E-05	2.213661
09142011	02	0.062	0.010	0.008	0.001	0.001	0.001	0.003	0.008	0.014	0.001	0.016	291.962	0.786	0.9202188E-01	1.422584	0.8708898E-05	2.213115
09142011	03	0.052	0.009	0.007	0.001	0.001	0.001	0.003	0.007	0.014	0.001	0.016	291.608	0.800	0.9240019E-01	1.647117	0.1283134E-04	2.108452
09142011	04	0.049	0.010	0.007	0.001	0.001	0.001	0.003	0.008	0.013	0.001	0.016	291.386	0.808	0.9289235E-01	1.545189	0.1039173E-04	2.172294
09142011	05	0.056	0.012	0.007	0.001	0.001	0.001	0.003	0.010	0.009	0.001	0.016	291.110	0.821	0.1055420	1.259115	0.4838623E-05	2.415344
09142011	06	0.076	0.015	0.007	0.001	0.001	0.002	0.004	0.013	0.003	0.002	0.017	290.859	0.829	0.2422681	1.119991	0.6177625E-06	3.258393
09142011	07	0.097	0.020	0.008	0.001	0.001	0.003	0.005	0.017	0.001	0.001	0.018	290.879	0.821	0.6891221E-01	0.2459208	0.9614212E-07	3.407881
09142011	08	0.091	0.022	0.018	0.001	0.001	0.003	0.006	0.020	0.001	0.001	0.018	293.144	0.751	0.000000	0.3942152E-08	0.2827238E-18	7.144371
09142011	09	0.067	0.020	0.030	0.001	0.001	0.002	0.005	0.016	0.002	0.002	0.018	296.247	0.637	0.1138830E-01	0.1351253	0.5672343E-07	3.376974
09142011	10	0.054	0.016	0.047	0.000	0.001	0.002	0.004	0.011	0.007	0.001	0.018	298.931	0.534	NaN	1.758001	0.3684959E-04	1.678587
09142011	11	0.051	0.012	0.063	0.000	0.001	0.001	0.003	0.008	0.012	0.001	0.016	301.592	0.438	NaN	1.267644	0.8332185E-02	-0.8177615
09142011	12	0.071	0.010	0.064	0.000	0.000	0.001	0.002	0.005	0.015	0.000	0.014	303.300	0.381	NaN	1.086846	0.2238015E-04	1.686305
09142011	13	0.078	0.013	0.069	0.000	0.000	0.001	0.002	0.005	0.016	0.000	0.014	304.915	0.337	NaN	0.9057439	0.8511234E-05	2.027013
09142011	14	0.067	0.015	0.066	0.000	0.000	0.001	0.002	0.005	0.016	0.000	0.015	305.777	0.314	NaN	0.7744632	0.4881942E-04	1.200408
09142011	15	0.057	0.016	0.054	0.000	0.000	0.001	0.002	0.004	0.016	0.000	0.014	305.315	0.319	NaN	0.7387339	0.3244425E-04	1.357350
09142011	16	0.048	0.018	0.046	0.000	0.000	0.001	0.002	0.004	0.016	0.000	0.014	304.271	0.341	NaN	0.7603164	0.8456902E-04	0.9537830
09142011	17	0.044	0.022	0.046	0.000	0.001	0.001	0.002	0.005	0.020	0.000	0.017	302.840	0.372	NaN	0.9826778	0.6962948E-03	0.1496180
09142011	18	0.046	0.028	0.046	0.000	0.001	0.001	0.003	0.007	0.022	0.000	0.020	301.203	0.409	NaN	1.236988	0.2063834E-03	0.7776907
09142011	19	0.079	0.044	0.040	0.000	0.001	0.002	0.004	0.015	0.010	0.000	0.024	299.040	0.456	NaN	1.257114	0.6942053E-05	2.257887
09142011	20	0.111	0.063	0.050	0.000	0.001	0.002	0.006	0.021	0.002	0.002	0.027	297.259	0.511	NaN	1.594395	0.2874571E-05	2.744023
09142011	21	0.115	0.081	0.059	0.000	0.001	0.003	0.006	0.023	0.004	0.002	0.030	295.984	0.562	NaN	2.399327	0.5089394E-05	2.673423
09142011	22	0.109	0.097	0.066	0.000	0.001	0.003	0.006	0.023	0.009	0.003	0.032	295.051	0.605	NaN	3.440240	0.1150932E-04	2.475539
09142011	23	0.099	0.108	0.072	0.000	0.001	0.002	0.006	0.023	0.014	0.004	0.033	294.282	0.646	NaN	4.414986	0.2590041E-04	2.231623
09142011	24	0.089	0.116	0.080	0.000	0.001	0.002	0.006	0.022	0.019	0.006	0.033	293.620	0.687	NaN	5.910003	0.9116985E-04	1.811736
09152011	01	0.079	0.120	0.090	0.000	0.001	0.002	0.006	0.021	0.025	0.009	0.034	293.006	0.733	NaN	7.584795	0.6836785E-02	0.4509191E-01
09152011	02	0.067	0.122	0.100	0.000	0.001	0.002	0.005	0.020	0.033	0.014	0.034	292.577	0.766	NaN	8.919285	0.2637448E-01	-0.4708540
09152011	03	0.061	0.123	0.105	0.000	0.001	0.002	0.005	0.020	0.039	0.018	0.034	292.383	0.778	NaN	9.431082	0.3517288E-01	-0.5716465
09152011	04	0.063	0.123	0.103	0.000	0.001	0.002	0.005	0.020	0.042	0.022	0.034	292.281	0.786	NaN	10.45631	0.3197857E-01	-0.4854807
09152011	05	0.078	0.122	0.089	0.001	0.001	0.002	0.006	0.021	0.044	0.028	0.034	292.252	0.791	0.2958738	5.417824	0.1484789E-04	2.562160
09152011	06	0.108	0.121	0.070	0.001	0.001	0.003	0.007	0.025	0.042	0.034	0.035	292.286	0.792	0.3952498	5.580306	0.8233560E-05	2.831070
09152011	07	0.146	0.124	0.057	0.001	0.002	0.004	0.008	0.030	0.034	0.033	0.035	292.382	0.793	0.4147332	4.269866	0.4336608E-05	2.993264
09152011	08	0.138	0.105	0.055	0.005	0.002	0.005	0.008	0.033	0.035	0.030	0.039	294.693	0.785	0.2458486	3.003948	0.2795205E-05	3.031279
09152011	09	0.091	0.057	0.063	0.006	0.002	0.004	0.007	0.029	0.036	0.019	0.042	296.567	0.740	0.1087100	2.576937	0.5947606E-05	2.636762
09152011	10	0.041	0.023	0.069	0.002	0.001	0.003	0.004	0.015	0.053	0.008	0.042	297.310	0.748	0.4820853E-01	4.156207	0.8945230E-04	1.667106
09152011	11	0.028	0.019	0.072	0.001	0.001	0.002	0.003	0.009	0.060	0.005	0.040	298.388	0.726	0.2629435E-01	4.209445	0.2094169E-03	1.303213
09152011	12	0.015	0.043	0.075	0.000	0.001	0.001	0.003	0.006	0.063	0.002	0.040	299.984	0.667	NaN	4.410231	0.5554217E-01	-1.100162
09152011	13	0.006	0.037	0.065	0.000	0.001	0.001	0.003	0.007	0.071	0.001	0.045	300.432	0.650	0.1766211E-01	5.199996	0.6767587E-02	-0.1144309
09152011	14	0.006	0.027	0.049	0.000	0.001	0.001	0.003	0.007	0.075	0.001	0.049	301.384	0.606	0.1607394E-01	4.259783	0.6574911E-02	-0.1885024
09152011	15	0.009	0.024	0.033	0.001	0.001	0.001	0.003	0.007	0.071	0.001	0.046	300.154	0.611	0.1677275E-03	4.877611	0.6196757E-02	-0.1039573
09152011	16	0.019	0.019	0.024	0.001	0.001	0.001	0.003	0.007	0.057	0.001	0.038	299.434	0.621	0.1645344E-01	2.843254	0.1995489E-03	1.153766
09152011	17	0.023	0.017	0.018	0.001	0.001	0.001	0.003	0.006	0.045	0.001	0.031	297.256	0.663	0.1871693E-01	2.596682	0.1711384E-03	1.181071
09152011	18	0.027	0.017	0.013	0.001	0.001	0.001	0.003	0.007	0.040	0.001	0.030	295.616	0.693	0.2383691E-01	2.633200	0.1661388E-03	1.200013
09152011	19	0.021	0.013	0.009	0.001	0.001	0.001	0.003	0.008	0.040	0.001	0.030	294.168	0.720	0.3135961E-01	2.786443	0.1574205E-03	1.247989
09152011	20	0.017	0.010	0.008	0.001	0.002	0.001	0.003	0.007	0.044	0.001	0.031	293.146	0.739	0.4056573E-01	3.278445	0.1838795E-03	1.251135
09152011	21	0.013	0.010	0.007	0.001	0.002	0.001	0.003	0.006	0.046	0.001	0.032	292.324	0.755	0.5071086E-01	3.817603	0.2101735E-03	1.259213
09152011	22	0.011	0.010	0.007	0.001	0.002	0.001	0.002	0.005	0.046	0.001	0.031	291.568	0.769	0.5474108E-01	3.979460	0.2334402E-03	1.231648
09152011	23	0.010	0.010	0.007	0.001	0.002	0.001	0.002	0.005	0.044	0.001	0.029	290.398	0.798	0.6153369E-01	4.177094	0.2318443E-03	1.255678
09152011	24	0.009	0.011	0.007	0.001	0.002	0.001	0.002	0.004	0.042	0.001	0.028	289.554	0.818	0.6542265E-01	4.584677	0.2672886E-03	1.234328
09162011	01	0.009	0.012	0.007	0.001	0.002	0.001	0.002	0.004	0.041	0.001	0.027	288.832	0.834	0.8304471E-01	4.654229	0.2205353E-03	1.324370
09162011	02	0.009	0.012	0.007	0.001	0.002	0.001	0.002	0.004	0.040	0.001	0.026	288.469	0.839	0.9995198E-01	4.739247	0.1822374E-03	1.415072
09162011	03	0.013	0.012	0.006	0.001	0.002	0.001	0.002	0.005	0.037	0.001	0.026	288.595	0.829	0.1099086	4.290689	0.1387517E-03	1.490289
09162011	04	0.029	0.013	0.006	0.001	0.002	0.001	0.003	0.008	0.030	0.001	0.025	288.888	0.813	0.1679592	3.220054	0.4532737E-04	1.851503
09162011	05	0.060	0.017	0.006	0.001	0.002	0.001	0.004	0.012	0.021	0.002	0.025	289.238	0.794	0.2200150	2.340643	0.1457975E-04	2.205585
09162011	06	0.098	0.021	0.005	0.001	0.002	0.002	0.005	0.017	0.012	0.002	0.027	289.595	0.773	0.2814971	1.769325	0.3784098E-05	2.669845
09162011	07	0.114	0.024	0.005	0.002	0.002	0.004	0.006	0.021	0.004	0.003	0.028	289.945	0.753	0.4005588	1.409066	0.5253985E-06	3.428442
09162011	08	0.086	0.021	0.011	0.002	0.002	0.003	0.006	0.021	0.006	0.004	0.028	291.822	0.687	0.2071040	1.118258	0.6660564E-06	3.225031
09162011	09	0.048	0.014	0.022	0.001	0.002	0.002	0.003	0.010	0.024	0.002	0.024	293.218	0.640	0.4855216E-01	1.510668	0.2870367E-04	1.721232
09162011	10	0.032	0.011	0.033	0.001	0.001	0.001	0.002	0.004	0.035	0.001	0.023	294.331	0.609	0.2404720E-01	1.743855	0.1100728E-03	1.199830
09162011	11	0.033	0.011	0.040	0.000	0.001	0.001	0.002	0.004	0.037	0.001	0.023	295.268	0.582	NaN	2.751319	0.2867578E-02	-0.1797425E-01
09162011	12	0.035	0.012	0.043	0.000	0.001	0.001	0.002	0.004	0.038	0.001	0.024	295.945	0.556	NaN	2.668808	0.4246510E-02	-0.2017148
09162011	13	0.034	0.013	0.040	0.000	0.001	0.001	0.002	0.004	0.042	0.001	0.027	296.336	0.533	NaN	2.524343	0.4400591E-02	-0.2413625
09162011	14	0.037	0.014	0.037	0.000	0.001	0.001	0.002	0.005	0.043	0.001	0.028	296.280	0.519	NaN	2.485517	0.8432691E-03	0.4694506
09162011	15	0.045	0.014	0.036	0.000	0.001	0.001	0.002	0.005	0.041	0.001	0.027	295.046	0.524	NaN	2.421024	0.1663961E-03	1.162856
09162011	16	0.054	0.012	0.032	0.000	0.001	0.001	0.003	0.006	0.040	0.001	0.028	293.911	0.535	NaN	2.477136	0.7189870E-04	1.537229
09162011	17	0.071	0.013	0.023	0.000	0.001	0.001	0.003	0.007	0.035	0.001	0.026	293.099	0.540	NaN	2.022408	0.2862308E-04	1.849152
09162011	18	0.086	0.015	0.018	0.001	0.001	0.001	0.003	0.008	0.029	0.001	0.025	292.553	0.544	0.6440139E-01	1.270440	0.3080377E-04	1.615350
09162011	19	0.092	0.015	0.014	0.001	0.001	0.001	0.003	0.009	0.026	0.001	0.024	291.629	0.546	0.8036739E-01	1.160321	0.2167320E-04	1.728655
09162011	20	0.094	0.015	0.012	0.001	0.001	0.001	0.003	0.008	0.026	0.001	0.024	291.058	0.550	0.9657228E-01	1.236048	0.2266124E-04	1.736752
09162011	21	0.092	0.014	0.010	0.001	0.001	0.001	0.003	0.008	0.027	0.001	0.024	290.527	0.559	0.1114293	1.272868	0.2170912E-04	1.768141
09162011	22	0.085	0.013	0.009	0.001	0.001	0.001	0.003	0.007	0.028	0.001	0.023	290.045	0.569	0.1207116	1.311250	0.2208474E-04	1.773593
09162011	23	0.075	0.012	0.008	0.001	0.001	0.001	0.003	0.006	0.029	0.001	0.023	289.570	0.579	0.1284747	1.430277	0.2634322E-04	1.734751
09162011	24	0.064	0.012	0.008	0.001	0.001	0.001	0.003	0.006	0.030	0.001	0.023	289.078	0.589	0.1303809	1.474300	0.2880722E-04	1.709085
09172011	01	0.056	0.011	0.007	0.001	0.001	0.001	0.003	0.005	0.031	0.001	0.023	288.542	0.599	0.1386428	1.602388	0.3428802E-04	1.669625
09172011	02	0.050	0.011	0.007	0.001	0.001	0.001	0.003	0.005	0.031	0.001	0.023	288.125	0.609	0.1420451	1.653315	0.3658831E-04	1.655013
09172011	03	0.046	0.011	0.007	0.001	0.001	0.001	0.003	0.006	0.031	0.001	0.023	287.872	0.619	0.1431222	1.614335	0.3404032E-04	1.676000
09172011	04	0.046	0.011	0.008	0.001	0.001	0.001	0.003	0.006	0.030	0.001	0.023	287.699	0.627	0.1507866	1.673205	0.3371957E-04	1.695667
09172011	05	0.047	0.012	0.009	0.001	0.001	0.001	0.003	0.006	0.030	0.002	0.023	287.522	0.635	0.1650929	1.745219	0.3182149E-04	1.739130
09172011	06	0.050	0.012	0.012	0.001	0.001	0.001	0.003	0.006	0.030	0.002	0.023	287.430	0.641	0.1783975	1.774623	0.2916083E-04	1.784306
09172011	07	0.057	0.013	0.013	0.001	0.001	0.001	0.003	0.008	0.027	0.003	0.023	287.388	0.644	0.1885263	1.605081	0.2042878E-04	1.895255
09172011	08	0.061	0.013	0.015	0.001	0.001	0.001	0.004	0.008	0.025	0.003	0.022	288.601	0.632	0.1442076	1.424626	0.1776341E-04	1.904175
09172011	09	0.052	0.012	0.022	0.001	0.001	0.001	0.003	0.007	0.029	0.003	0.022	290.629	0.604	0.7622629E-01	1.372899	0.3093634E-04	1.647170
09172011	10	0.049	0.011	0.028	0.000	0.001	0.001	0.003	0.006	0.029	0.003	0.022	292.830	0.567	NaN	2.225626	0.4569050E-04	1.687626
09172011	11	0.049	0.012	0.036	0.000	0.001	0.001	0.003	0.006	0.030	0.002	0.023	294.755	0.539	NaN	2.249236	0.7995783E-04	1.449174
09172011	12	0.043	0.015	0.045	0.000	0.001	0.001	0.003	0.006	0.040	0.002	0.028	296.250	0.518	NaN	2.576794	0.1763141E-02	0.1647925
09172011	13	0.047	0.015	0.050	0.000	0.001	0.001	0.003	0.006	0.041	0.002	0.029	297.438	0.502	NaN	2.525191	0.2810529E-02	-0.4649392E-01
09172011	14	0.053	0.013	0.047	0.000	0.001	0.001	0.003	0.006	0.040	0.002	0.029	298.010	0.491	NaN	2.448713	0.3743730E-03	0.8156332
09172011	15	0.060	0.011	0.043	0.000	0.001	0.001	0.003	0.007	0.039	0.001	0.028	297.850	0.492	NaN	2.231261	0.8016701E-04	1.444555
09172011	16	0.069	0.011	0.038	0.000	0.001	0.001	0.003	0.007	0.036	0.001	0.027	297.400	0.499	NaN	2.146691	0.4657804E-04	1.663588
09172011	17	0.079	0.010	0.033	0.000	0.001	0.001	0.003	0.007	0.033	0.001	0.026	296.627	0.508	NaN	2.048902	0.3171817E-04	1.810213
09172011	18	0.091	0.010	0.026	0.000	0.001	0.001	0.003	0.008	0.030	0.001	0.025	295.716	0.514	NaN	1.755832	0.1938164E-04	1.957093
09172011	19	0.111	0.012	0.018	0.000	0.001	0.002	0.004	0.010	0.022	0.001	0.025	294.741	0.523	NaN	1.528542	0.1059549E-04	2.159156
09172011	20	0.130	0.015	0.014	0.001	0.002	0.002	0.005	0.015	0.010	0.001	0.024	293.864	0.547	0.6201756E-01	0.7439662	0.3047695E-05	2.387582
09172011	21	0.123	0.014	0.011	0.001	0.002	0.002	0.006	0.016	0.006	0.002	0.023	293.198	0.571	0.9618777E-01	0.6240429	0.7155320E-06	2.940585
09172011	22	0.104	0.012	0.008	0.001	0.001	0.002	0.005	0.014	0.007	0.001	0.022	292.609	0.598	0.7192576E-01	0.7550567	0.2534404E-05	2.474104
09172011	23	0.078	0.010	0.007	0.002	0.001	0.002	0.005	0.012	0.011	0.001	0.021	291.981	0.632	0.7388794E-01	0.9248303	0.4655846E-05	2.298063
09172011	24	0.054	0.009	0.005	0.002	0.001	0.001	0.004	0.009	0.017	0.001	0.021	291.372	0.668	0.6548506E-01	1.306899	0.2155564E-04	1.782681
09182011	01	0.037	0.008	0.006	0.002	0.001	0.001	0.003	0.007	0.022	0.001	0.021	290.728	0.708	0.6935561E-01	1.754607	0.4072176E-04	1.634353
09182011	02	0.028	0.006	0.006	0.002	0.001	0.001	0.003	0.006	0.027	0.001	0.022	290.100	0.744	0.7979882E-01	2.221396	0.5790861E-04	1.583883
09182011	03	0.023	0.005	0.008	0.002	0.001	0.001	0.003	0.005	0.033	0.001	0.024	289.650	0.768	0.9621996E-01	2.960966	0.8256217E-04	1.554652
09182011	04	0.022	0.005	0.009	0.002	0.001	0.001	0.003	0.005	0.037	0.001	0.026	289.324	0.785	0.1174787	3.574124	0.9348588E-04	1.582424
09182011	05	0.024	0.005	0.010	0.002	0.001	0.001	0.003	0.005	0.037	0.002	0.026	289.059	0.797	0.1400919	3.791764	0.8326775E-04	1.658364
09182011	06	0.027	0.006	0.010	0.001	0.001	0.001	0.003	0.006	0.036	0.002	0.026	288.835	0.808	0.1701060	3.832575	0.6485313E-04	1.771560
09182011	07	0.032	0.007	0.011	0.001	0.001	0.001	0.003	0.007	0.033	0.003	0.026	288.640	0.817	0.2013737	3.933199	0.5167632E-04	1.881454
09182011	08	0.033	0.008	0.013	0.001	0.001	0.001	0.004	0.008	0.030	0.004	0.025	289.666	0.795	0.1508242	3.186037	0.4250437E-04	1.874817
09182011	09	0.024	0.006	0.021	0.001	0.001	0.001	0.003	0.007	0.029	0.003	0.023	291.463	0.742	0.5499411E-01	2.269753	0.7029264E-04	1.509069
09182011	10	0.023	0.005	0.025	0.001	0.001	0.001	0.003	0.006	0.027	0.002	0.021	293.231	0.685	0.2691495E-01	1.760826	0.8137217E-04	1.335241
09182011	11	0.026	0.004	0.027	0.000	0.001	0.001	0.003	0.005	0.027	0.002	0.021	294.807	0.639	NaN	2.679551	0.1615040E-02	0.2198787
09182011	12	0.030	0.005	0.029	0.000	0.001	0.001	0.003	0.006	0.026	0.001	0.021	296.012	0.602	NaN	2.335638	0.4381820E-03	0.7267509
09182011	13	0.037	0.005	0.031	0.000	0.001	0.001	0.003	0.006	0.025	0.001	0.021	296.944	0.573	NaN	2.168144	0.1886452E-03	1.060442
09182011	14	0.044	0.005	0.032	0.000	0.001	0.001	0.003	0.006	0.025	0.001	0.021	297.419	0.556	NaN	2.123417	0.9629508E-04	1.343431
09182011	15	0.047	0.005	0.030	0.000	0.001	0.001	0.003	0.006	0.027	0.001	0.022	297.351	0.554	NaN	2.064804	0.7593519E-04	1.434436
09182011	16	0.053	0.005	0.027	0.000	0.001	0.001	0.003	0.007	0.025	0.001	0.022	296.930	0.562	NaN	1.979857	0.4723546E-04	1.622365
09182011	17	0.063	0.005	0.022	0.000	0.001	0.001	0.003	0.007	0.023	0.001	0.020	296.184	0.574	NaN	1.744564	0.2355984E-04	1.869515
09182011	18	0.073	0.005	0.017	0.000	0.001	0.001	0.003	0.007	0.019	0.001	0.019	295.254	0.585	NaN	1.625039	0.1685904E-04	1.984031
09182011	19	0.082	0.006	0.011	0.001	0.001	0.001	0.003	0.008	0.013	0.001	0.018	294.343	0.598	0.3177780E-01	0.8908289	0.1587618E-04	1.749048
09182011	20	0.086	0.008	0.007	0.001	0.001	0.002	0.004	0.011	0.005	0.001	0.017	293.682	0.616	0.5567247E-01	0.6356283	0.1360430E-05	2.669527
09182011	21	0.078	0.008	0.006	0.001	0.001	0.002	0.004	0.011	0.002	0.001	0.016	293.122	0.632	0.8458042E-01	0.5694681	0.5020467E-06	3.054725
09182011	22	0.066	0.007	0.005	0.002	0.001	0.002	0.004	0.010	0.002	0.001	0.015	292.596	0.649	0.8896142E-01	0.6083484	0.5734670E-06	3.025644
09182011	23	0.055	0.007	0.005	0.002	0.001	0.001	0.004	0.010	0.002	0.001	0.014	292.105	0.665	0.6002027E-01	0.4642791	0.6573562E-06	2.848979
09182011	24	0.044	0.006	0.004	0.002	0.001	0.001	0.003	0.010	0.001	0.001	0.013	291.622	0.679	0.8935851E-01	0.3956233	0.2516510E-06	3.196483
09192011	01	0.037	0.006	0.005	0.002	0.001	0.001	0.003	0.009	0.001	0.001	0.012	291.120	0.696	0.8624524E-01	0.4271405	0.3287955E-06	3.113645
09192011	02	0.033	0.006	0.005	0.002	0.001	0.001	0.003	0.009	0.002	0.001	0.012	290.749	0.708	0.8883590E-01	0.4432402	0.3618205E-06	3.088146
09192011	03	0.032	0.007	0.006	0.002	0.001	0.001	0.003	0.009	0.002	0.001	0.012	290.531	0.716	0.8767897E-01	0.4634424	0.4133790E-06	3.049647
09192011	04	0.036	0.009	0.006	0.001	0.001	0.001	0.003	0.009	0.001	0.001	0.012	290.402	0.719	0.9627050E-01	0.4622785	0.3899589E-06	3.073885
09192011	05	0.045	0.011	0.008	0.001	0.001	0.001	0.004	0.011	0.001	0.001	0.012	290.301	0.722	0.2669185E-01	0.1160441	0.5625762E-07	3.314442
09192011	06	0.060	0.015	0.008	0.001	0.001	0.002	0.005	0.014	0.001	0.001	0.013	290.258	0.721	0.000000	0.4481593E-08	0.1000048E-13	2.651412
09192011	07	0.070	0.019	0.005	0.002	0.002	0.003	0.005	0.017	0.001	0.004	0.013	290.217	0.721	0.2244633	0.1812301	0.2341346E-07	3.888765
09192011	08	0.065	0.019	0.008	0.003	0.002	0.003	0.006	0.017	0.001	0.008	0.013	291.416	0.698	NaN	2.064340	0.1331471E-09	7.190450
09192011	09	0.051	0.017	0.020	0.001	0.001	0.002	0.004	0.010	0.002	0.002	0.012	292.945	0.670	0.2168256E-01	0.1709025	0.9160500E-07	3.270829
09192011	10	0.037	0.016	0.024	0.001	0.001	0.001	0.003	0.006	0.007	0.002	0.012	294.344	0.636	0.1338470E-01	0.6211636	0.1055229E-04	1.769859
09192011	11	0.033	0.015	0.029	0.000	0.001	0.001	0.002	0.006	0.009	0.001	0.012	295.741	0.599	NaN	1.611052	0.7065261E-04	1.357981
09192011	12	0.033	0.013	0.033	0.000	0.001	0.001	0.002	0.006	0.010	0.001	0.012	296.712	0.574	NaN	1.546672	0.1486941E-03	1.017104
09192011	13	0.036	0.011	0.034	0.000	0.001	0.001	0.002	0.006	0.010	0.001	0.012	297.483	0.554	NaN	1.456558	0.7679984E-04	1.277967
09192011	14	0.038	0.010	0.032	0.000	0.001	0.001	0.002	0.005	0.011	0.001	0.013	297.876	0.543	NaN	1.487485	0.8783562E-04	1.228782
09192011	15	0.040	0.011	0.032	0.000	0.001	0.001	0.002	0.006	0.013	0.001	0.014	297.667	0.547	NaN	1.550495	0.5132669E-04	1.480127
09192011	16	0.043	0.013	0.030	0.000	0.001	0.001	0.002	0.006	0.013	0.001	0.015	297.188	0.556	NaN	1.631535	0.4622380E-04	1.547731
09192011	17	0.048	0.015	0.026	0.000	0.001	0.001	0.003	0.006	0.014	0.001	0.015	296.343	0.569	NaN	1.553144	0.2275593E-04	1.834117
09192011	18	0.056	0.013	0.019	0.000	0.001	0.001	0.003	0.007	0.014	0.001	0.016	295.323	0.582	NaN	1.389559	0.1424268E-04	1.989285
09192011	19	0.074	0.012	0.011	0.001	0.001	0.001	0.003	0.009	0.007	0.001	0.015	294.424	0.595	0.2147007E-01	0.5442798	0.5497648E-05	1.995645
09192011	20	0.085	0.014	0.008	0.001	0.001	0.002	0.004	0.013	0.000	0.001	0.014	293.786	0.614	0.1254588E-01	0.5252942E-01	0.1159346E-07	3.656190
09192011	21	0.079	0.013	0.008	0.001	0.001	0.002	0.004	0.014	0.000	0.001	0.013	293.267	0.633	0.000000	0.6369982E-08	0.1000354E-13	2.803985
09192011	22	0.070	0.012	0.007	0.001	0.001	0.002	0.005	0.014	0.000	0.001	0.013	292.852	0.650	0.000000	0.5323465E-08	0.3510740E-18	7.180796
09192011	23	0.060	0.012	0.007	0.001	0.001	0.002	0.005	0.014	0.000	0.001	0.013	292.489	0.665	0.000000	0.4282446E-08	0.1000353E-13	2.631539
09192011	24	0.049	0.011	0.007	0.001	0.001	0.002	0.005	0.013	0.001	0.001	0.013	292.092	0.683	0.000000	0.3562669E-08	0.2336062E-18	7.183291
09202011	01	0.040	0.010	0.007	0.001	0.001	0.001	0.005	0.013	0.001	0.001	0.013	291.667	0.702	0.000000	0.2776311E-08	0.1000004E-13	2.443466
09202011	02	0.034	0.010	0.008	0.001	0.001	0.001	0.005	0.012	0.001	0.001	0.013	291.477	0.714	0.1831484E-01	0.1047119	0.5497266E-07	3.279849
09202011	03	0.032	0.010	0.009	0.001	0.001	0.001	0.005	0.012	0.001	0.001	0.014	291.290	0.739	0.3963226E-01	0.2514238	0.1526270E-06	3.216775
09202011	04	0.035	0.011	0.010	0.001	0.001	0.001	0.005	0.013	0.001	0.001	0.014	291.103	0.765	0.2424884E-01	0.1529866	0.9988378E-07	3.185158
09202011	05	0.045	0.013	0.011	0.001	0.001	0.002	0.006	0.015	0.001	0.001	0.015	290.927	0.789	0.000000	0.2197365E-08	0.1000028E-13	2.341890
09202011	06	0.061	0.018	0.010	0.001	0.002	0.003	0.006	0.018	0.001	0.001	0.015	290.786	0.813	0.000000	0.2780679E-08	0.1000023E-13	2.444141
09202011	07	0.062	0.016	0.006	0.001	0.002	0.003	0.007	0.021	0.001	0.005	0.016	290.692	0.837	0.1988825	0.3631848	0.1710388E-06	3.327033
09202011	08	0.053	0.014	0.000	0.003	0.002	0.004	0.008	0.023	0.002	0.017	0.016	291.668	0.837	NaN	3.553226	0.2535394E-09	7.146577
09202011	09	0.040	0.017	0.011	0.002	0.002	0.003	0.007	0.021	0.002	0.015	0.016	293.720	0.795	0.8149958E-01	0.2696294	0.1689924E-06	3.202900
09202011	10	0.027	0.033	0.025	0.001	0.001	0.002	0.005	0.011	0.003	0.003	0.015	295.644	0.754	0.3446597E-01	0.6453581	0.8825515E-06	2.864061
09202011	11	0.022	0.029	0.032	0.001	0.001	0.001	0.004	0.009	0.005	0.002	0.014	296.364	0.731	0.9580910E-02	0.6939188	0.6887259E-05	2.003262
09202011	12	0.012	0.014	0.031	0.000	0.001	0.001	0.003	0.007	0.016	0.001	0.017	296.754	0.722	NaN	2.158588	0.1520306E-01	-0.8477613
09202011	13	0.018	0.007	0.029	0.000	0.001	0.001	0.003	0.007	0.017	0.001	0.018	297.156	0.710	NaN	2.483194	0.7829205E-02	-0.4987071
09202011	14	0.034	0.008	0.031	0.001	0.001	0.001	0.003	0.010	0.010	0.001	0.019	297.341	0.708	0.9361804E-02	1.136363	0.3619823E-04	1.496830
09202011	15	0.041	0.008	0.031	0.001	0.001	0.002	0.004	0.013	0.006	0.002	0.019	297.539	0.715	0.1853621E-01	0.8744369	0.3739982E-05	2.368859
09202011	16	0.044	0.008	0.030	0.001	0.001	0.002	0.004	0.014	0.004	0.002	0.019	297.071	0.727	0.3041929E-01	0.7989634	0.1430991E-05	2.746890
09202011	17	0.045	0.008	0.026	0.001	0.001	0.002	0.005	0.015	0.003	0.003	0.020	296.612	0.737	0.4999393E-01	0.8481514	0.8412389E-06	3.003554
09202011	18	0.043	0.008	0.022	0.001	0.002	0.002	0.005	0.016	0.002	0.003	0.020	296.082	0.751	0.4321611E-01	0.6427702	0.8725809E-06	2.867250
09202011	19	0.045	0.009	0.014	0.001	0.002	0.003	0.006	0.020	0.001	0.002	0.021	295.400	0.774	0.1345605E-01	0.1477423	0.8499917E-07	3.240090
09202011	20	0.046	0.010	0.011	0.001	0.002	0.003	0.007	0.025	0.001	0.001	0.021	294.836	0.802	0.000000	0.1306907E-08	0.1000038E-13	2.116228
09202011	21	0.052	0.010	0.011	0.001	0.002	0.003	0.007	0.024	0.001	0.001	0.021	294.408	0.814	0.000000	0.1496965E-08	0.1175063E-18	7.105150
09202011	22	0.058	0.011	0.011	0.001	0.002	0.002	0.007	0.022	0.001	0.001	0.021	293.900	0.859	0.000000	0.1539916E-08	0.1217120E-18	7.102163
09202011	23	0.053	0.009	0.009	0.001	0.001	0.002	0.006	0.019	0.002	0.001	0.019	293.925	0.863	0.000000	0.1433713E-08	0.1000125E-13	2.156408
09202011	24	0.036	0.007	0.006	0.002	0.001	0.001	0.005	0.014	0.002	0.001	0.017	293.687	0.906	0.1475543	1.399036	0.1134756E-05	3.090926
09212011	01	0.023	0.006	0.005	0.001	0.001	0.001	0.003	0.011	0.002	0.001	0.015	293.514	0.933	0.9398997E-01	2.008830	0.5080452E-05	2.597041
09212011	02	0.020	0.008	0.005	0.001	0.001	0.001	0.003	0.010	0.001	0.001	0.012	293.407	0.947	0.1464899	1.855524	0.2180989E-05	2.929813
09212011	03	0.020	0.010	0.005	0.001	0.001	0.001	0.003	0.009	0.001	0.001	0.010	293.340	0.950	0.7844150E-01	0.9482508	0.1037739E-05	2.960835
09212011	04	0.023	0.010	0.006	0.001	0.001	0.001	0.003	0.009	0.000	0.000	0.009	293.170	0.960	0.000000	0.1107888E-08	0.8992708E-19	7.090605
09212011	05	0.031	0.011	0.003	0.002	0.001	0.001	0.003	0.011	0.000	0.004	0.008	293.057	0.965	0.1468658E-03	0.1198994E-02	0.6378514E-08	2.274097
09212011	06	0.047	0.012	0.000	0.003	0.001	0.002	0.004	0.014	0.000	0.009	0.007	293.041	0.965	NaN	8.988245	0.7277194E-09	7.091711
09212011	07	0.065	0.015	0.000	0.004	0.002	0.003	0.005	0.019	0.000	0.011	0.008	293.083	0.965	NaN	11.47604	0.9306974E-09	7.090983
09212011	08	0.062	0.016	0.002	0.006	0.002	0.003	0.005	0.018	0.001	0.015	0.009	294.634	0.928	NaN	7.831400	0.6622237E-09	7.072835
09212011	09	0.034	0.012	0.018	0.001	0.001	0.002	0.002	0.007	0.005	0.001	0.010	296.060	0.871	0.6121463E-01	0.9935988	0.1219262E-05	2.911114
09212011	10	0.013	0.007	0.024	0.000	0.000	0.001	0.001	0.002	0.014	0.000	0.010	297.438	0.824	NaN	3.119123	0.6929691E-02	-0.3466814
09212011	11	0.012	0.006	0.032	0.000	0.000	0.000	0.000	0.001	0.014	0.000	0.009	298.596	0.773	NaN	2.024233	0.2013181E-01	-0.9976221
09212011	12	0.013	0.007	0.041	0.000	0.000	0.000	0.000	0.001	0.014	0.000	0.008	299.359	0.742	NaN	1.840217	0.2664603E-01	-1.160764
09212011	13	0.012	0.007	0.050	0.000	0.000	0.000	0.000	0.001	0.015	0.000	0.009	300.030	0.711	NaN	1.616871	0.3827170E-01	-1.374202
09212011	14	0.011	0.008	0.053	0.000	0.000	0.000	0.000	0.001	0.017	0.000	0.010	300.268	0.698	NaN	1.614011	0.4234502E-01	-1.418896
09212011	15	0.013	0.009	0.050	0.000	0.000	0.001	0.000	0.001	0.018	0.000	0.011	300.007	0.700	NaN	1.962626	0.3545896E-01	-1.256888
09212011	16	0.015	0.009	0.046	0.000	0.000	0.001	0.000	0.001	0.019	0.000	0.011	299.719	0.705	NaN	2.215440	0.2769475E-01	-1.096938
09212011	17	0.022	0.011	0.045	0.000	0.000	0.001	0.000	0.001	0.018	0.000	0.011	298.914	0.712	NaN	2.570075	0.2013971E-01	-0.8941074
09212011	18	0.048	0.016	0.046	0.000	0.000	0.001	0.001	0.001	0.017	0.001	0.011	297.679	0.776	NaN	5.569273	0.7801247E-03	0.8536345
09212011	19	0.067	0.021	0.043	0.000	0.001	0.001	0.001	0.003	0.015	0.001	0.012	296.804	0.772	NaN	5.022137	0.6751921E-04	1.871461
09212011	20	0.077	0.024	0.043	0.000	0.001	0.001	0.001	0.003	0.014	0.002	0.012	296.129	0.764	NaN	4.846052	0.4575778E-04	2.024923
09212011	21	0.079	0.025	0.047	0.000	0.001	0.001	0.001	0.003	0.015	0.002	0.011	295.748	0.766	NaN	5.288047	0.4483343E-04	2.071693
09212011	22	0.086	0.027	0.053	0.000	0.001	0.001	0.001	0.003	0.014	0.002	0.011	295.403	0.777	NaN	6.114653	0.5000344E-04	2.087372
09212011	23	0.079	0.024	0.054	0.000	0.001	0.001	0.001	0.003	0.013	0.002	0.010	295.047	0.814	NaN	7.260544	0.7336127E-04	1.995502
09212011	24	0.049	0.015	0.043	0.000	0.001	0.001	0.001	0.002	0.013	0.002	0.009	294.781	0.849	NaN	8.070521	0.2736654E-03	1.469682
09222011	01	0.030	0.009	0.025	0.000	0.001	0.000	0.001	0.001	0.012	0.001	0.008	294.683	0.882	NaN	6.808073	0.3562668E-03	1.281249
09222011	02	0.021	0.006	0.011	0.000	0.001	0.000	0.001	0.001	0.012	0.000	0.007	294.659	0.906	NaN	5.157405	0.8878949E-04	1.764070
09222011	03	0.018	0.006	0.007	0.000	0.001	0.000	0.001	0.000	0.011	0.000	0.007	294.571	0.916	NaN	4.989231	0.1013326E-03	1.692284
09222011	04	0.012	0.014	0.007	0.000	0.001	0.000	0.001	0.000	0.012	0.000	0.007	294.355	0.937	NaN	6.677659	0.1931208E-03	1.538795
09222011	05	0.001	0.029	0.009	0.000	0.000	0.000	0.000	0.000	0.016	0.000	0.014	294.249	0.940	0.5949616E-02	7.529480	0.3115006E-02	0.3833060
09222011	06	0.012	0.026	0.011	0.000	0.000	0.001	0.000	0.000	0.026	0.000	0.017	294.273	0.901	NaN	6.784557	0.2621709E-02	0.4129370
09222011	07	0.055	0.020	0.011	0.000	0.001	0.002	0.001	0.000	0.024	0.002	0.013	293.850	0.925	NaN	10.77646	0.3650141E-04	2.470167
09222011	08	0.058	0.013	0.014	0.001	0.001	0.002	0.001	0.000	0.015	0.003	0.009	294.882	0.905	0.1464918	3.925472	0.1427252E-04	2.439391
09222011	09	0.042	0.008	0.023	0.000	0.001	0.001	0.001	0.000	0.008	0.001	0.006	296.133	0.866	NaN	5.724078	0.8246976E-04	1.841411
09222011	10	0.023	0.018	0.029	0.000	0.001	0.001	0.001	0.000	0.009	0.000	0.006	297.527	0.825	NaN	4.136664	0.3238038E-02	0.1063684
09222011	11	0.007	0.024	0.033	0.000	0.000	0.000	0.000	0.000	0.019	0.000	0.010	298.219	0.796	0.2301931E-02	1.715266	0.4117348E-03	0.6197139
09222011	12	0.006	0.015	0.047	0.000	0.000	0.000	0.000	0.000	0.025	0.000	0.013	298.500	0.779	0.2383649E-02	2.040816	0.6169099E-03	0.5195822
09222011	13	0.005	0.008	0.053	0.000	0.000	0.000	0.000	0.000	0.026	0.000	0.014	299.241	0.767	0.1452982E-02	2.108434	0.9478495E-03	0.3472206
09222011	14	0.006	0.005	0.049	0.000	0.000	0.000	0.000	0.000	0.023	0.000	0.012	299.044	0.774	0.1685441E-02	1.807229	0.6190544E-03	0.4652844
09222011	15	0.011	0.004	0.043	0.000	0.000	0.000	0.000	0.000	0.018	0.000	0.010	298.324	0.800	0.3240585E-02	1.715266	0.2912955E-03	0.7699977
09222011	16	0.012	0.003	0.030	0.000	0.000	0.000	0.000	0.000	0.013	0.000	0.007	297.643	0.826	0.3683925E-02	1.394422	0.1527348E-03	0.9604563
09222011	17	0.017	0.004	0.021	0.000	0.000	0.000	0.000	0.000	0.012	0.000	0.007	296.937	0.849	0.6857932E-02	1.565996	0.1022709E-03	1.185038
09222011	18	0.023	0.005	0.019	0.000	0.000	0.000	0.000	0.000	0.013	0.000	0.007	296.191	0.881	0.1575166E-01	1.952380	0.6045494E-04	1.509133
09222011	19	0.032	0.008	0.018	0.000	0.000	0.001	0.000	0.000	0.016	0.001	0.008	295.363	0.927	NaN	10.66884	0.1311328E-03	1.910406
09222011	20	0.018	0.007	0.015	0.000	0.000	0.000	0.000	0.000	0.017	0.001	0.009	295.031	0.945	0.6844932E-01	6.404483	0.7726179E-04	1.918519
09222011	21	0.002	0.006	0.009	0.000	0.000	0.000	0.000	0.000	0.012	0.000	0.010	294.573	0.952	0.8871555E-02	6.379080	0.1678523E-02	0.5798307
09222011	22	0.004	0.010	0.011	0.000	0.000	0.000	0.000	0.001	0.020	0.000	0.012	294.242	0.948	NaN	8.145805	0.4720960E-02	0.2369037
09222011	23	0.012	0.014	0.017	0.000	0.000	0.000	0.001	0.001	0.023	0.002	0.013	293.957	0.945	NaN	14.15501	0.3463262E-02	0.6114248
09222011	24	0.005	0.014	0.023	0.000	0.000	0.000	0.000	0.001	0.023	0.001	0.013	293.714	0.939	NaN	8.276336	0.1379411E-01	-0.2218555
09232011	01	0.002	0.012	0.026	0.000	0.000	0.000	0.000	0.001	0.022	0.001	0.014	293.511	0.935	0.2459431E-01	7.023296	0.2829546E-02	0.3948242
09232011	02	0.002	0.013	0.029	0.000	0.000	0.000	0.000	0.001	0.024	0.001	0.015	293.310	0.929	0.2232754E-01	6.458611	0.2897541E-02	0.3481095
09232011	03	0.004	0.015	0.031	0.000	0.000	0.000	0.000	0.001	0.031	0.001	0.016	293.135	0.926	NaN	8.841552	0.1971629E-01	-0.3482967
09232011	04	0.012	0.018	0.033	0.000	0.000	0.000	0.000	0.001	0.035	0.004	0.017	292.907	0.933	NaN	13.02817	0.1421057E-01	-0.3772797E-01
09232011	05	0.019	0.022	0.031	0.001	0.000	0.000	0.000	0.000	0.041	0.010	0.016	292.470	0.946	0.2751729	16.69306	0.1277281E-03	2.116250
09232011	06	0.030	0.027	0.021	0.002	0.000	0.001	0.000	0.000	0.055	0.024	0.017	292.145	0.956	0.6003641	33.64476	0.1258173E-03	2.427177
09232011	07	0.046	0.033	0.014	0.003	0.000	0.002	0.000	0.001	0.071	0.036	0.018	292.193	0.982	0.9133763	100.2979	0.1534455E-03	2.815337
09232011	08	0.028	0.028	0.022	0.005	0.000	0.002	0.000	0.001	0.085	0.038	0.024	292.350	0.987	0.9293029	266.8078	0.7890232E-03	2.529109
09232011	09	0.015	0.022	0.033	0.004	0.000	0.001	0.001	0.001	0.070	0.021	0.025	293.517	0.949	0.3708904	27.03526	0.1826329E-03	2.170352
09232011	10	0.013	0.033	0.046	0.001	0.000	0.001	0.000	0.001	0.050	0.007	0.023	295.685	0.877	0.5073774E-01	6.487294	0.1915446E-03	1.529794
09232011	11	0.002	0.065	0.048	0.000	0.000	0.000	0.000	0.001	0.029	0.000	0.019	296.965	0.809	0.2629459E-02	3.111090	0.3697759E-02	-0.7502608E-01
09232011	12	0.002	0.043	0.055	0.000	0.000	0.000	0.000	0.000	0.029	0.000	0.020	297.240	0.792	0.1064777E-02	3.046902	0.2807696E-02	0.3550847E-01
09232011	13	0.003	0.029	0.063	0.000	0.000	0.000	0.000	0.000	0.037	0.000	0.020	298.620	0.744	0.1019347E-01	2.684564	0.6421884E-03	0.6212113
09232011	14	0.005	0.025	0.067	0.000	0.000	0.001	0.000	0.000	0.038	0.000	0.021	298.313	0.724	NaN	2.868982	0.6255836E-01	-1.338557
09232011	15	0.019	0.023	0.078	0.000	0.000	0.001	0.000	0.001	0.038	0.001	0.021	298.735	0.723	NaN	3.742422	0.5711557E-01	-1.183602
09232011	16	0.022	0.024	0.065	0.000	0.000	0.001	0.000	0.001	0.036	0.001	0.020	298.312	0.729	NaN	3.961782	0.3983451E-01	-1.002369
09232011	17	0.027	0.024	0.056	0.000	0.000	0.001	0.000	0.001	0.031	0.001	0.017	297.401	0.750	NaN	4.330939	0.2403510E-01	-0.7442638
09232011	18	0.031	0.021	0.044	0.000	0.000	0.001	0.000	0.001	0.024	0.001	0.014	296.108	0.785	NaN	5.046451	0.9806617E-02	-0.2885332
09232011	19	0.049	0.018	0.028	0.000	0.001	0.001	0.001	0.001	0.018	0.001	0.011	294.777	0.832	NaN	5.593849	0.7184662E-04	1.891304
09232011	20	0.051	0.014	0.019	0.001	0.001	0.001	0.001	0.001	0.014	0.001	0.009	293.897	0.852	0.6893855E-01	2.017953	0.1631362E-04	2.092361
09232011	21	0.039	0.009	0.013	0.001	0.001	0.001	0.001	0.001	0.012	0.001	0.008	293.000	0.887	0.8609813E-01	2.355970	0.1532331E-04	2.186817
09232011	22	0.026	0.006	0.010	0.001	0.001	0.001	0.001	0.001	0.013	0.001	0.009	292.471	0.874	0.5543154E-01	2.160327	0.2773031E-04	1.891565
09232011	23	0.018	0.005	0.008	0.001	0.001	0.000	0.001	0.001	0.018	0.001	0.011	291.724	0.887	0.5815279E-01	3.073277	0.6237348E-04	1.692602
09232011	24	0.015	0.006	0.008	0.001	0.001	0.000	0.001	0.001	0.028	0.001	0.016	291.077	0.888	0.7914752E-01	4.586215	0.1123765E-03	1.610779
09242011	01	0.014	0.006	0.008	0.001	0.001	0.000	0.001	0.002	0.038	0.001	0.022	290.378	0.893	0.1090423	6.121824	0.1567131E-03	1.591776
09242011	02	0.015	0.006	0.008	0.001	0.001	0.001	0.002	0.005	0.044	0.002	0.028	289.881	0.892	0.1724359	7.195562	0.1242900E-03	1.762629
09242011	03	0.015	0.005	0.007	0.001	0.001	0.001	0.003	0.006	0.047	0.002	0.030	289.439	0.901	0.2334883	8.306838	0.1073002E-03	1.888835
09242011	04	0.016	0.006	0.007	0.001	0.001	0.001	0.003	0.006	0.049	0.003	0.032	289.061	0.911	0.2753828	10.11724	0.1220565E-03	1.918501
09242011	05	0.018	0.007	0.008	0.001	0.001	0.001	0.003	0.007	0.051	0.004	0.032	288.696	0.924	0.3836018	11.60617	0.8887308E-04	2.115919
09242011	06	0.024	0.009	0.007	0.002	0.001	0.001	0.003	0.008	0.051	0.007	0.033	288.406	0.934	0.5030624	14.44804	0.7505673E-04	2.284419
09242011	07	0.029	0.011	0.006	0.002	0.001	0.001	0.004	0.010	0.052	0.011	0.033	288.177	0.940	0.6518133	17.85959	0.5401591E-04	2.519350
09242011	08	0.029	0.011	0.009	0.002	0.001	0.001	0.004	0.010	0.055	0.012	0.035	289.266	0.898	0.4200804	10.41163	0.6092673E-04	2.232711
09242011	09	0.025	0.013	0.020	0.001	0.001	0.001	0.003	0.009	0.053	0.006	0.036	291.627	0.782	0.1060499	4.494694	0.1244082E-03	1.557851
09242011	10	0.018	0.022	0.035	0.000	0.001	0.001	0.003	0.008	0.050	0.003	0.035	294.564	0.647	NaN	3.595247	0.1423193E-01	-0.5975350
09242011	11	0.009	0.052	0.053	0.000	0.001	0.001	0.003	0.007	0.051	0.001	0.035	296.875	0.541	NaN	2.298258	0.4225933E-01	-1.264524
09242011	12	0.005	0.054	0.062	0.000	0.001	0.001	0.002	0.006	0.044	0.001	0.030	298.359	0.474	0.9719849E-02	2.152401	0.4647991E-02	-0.3343420
09242011	13	0.010	0.039	0.065	0.000	0.001	0.001	0.002	0.005	0.035	0.001	0.024	299.727	0.420	NaN	1.156799	0.5371988E-01	-1.666877
09242011	14	0.014	0.032	0.059	0.000	0.001	0.001	0.002	0.005	0.030	0.001	0.022	300.232	0.399	NaN	1.018123	0.4467512E-01	-1.642265
09242011	15	0.018	0.029	0.052	0.000	0.001	0.001	0.002	0.005	0.028	0.001	0.020	299.786	0.402	NaN	0.9957258	0.3109593E-01	-1.494564
09242011	16	0.022	0.029	0.049	0.000	0.001	0.001	0.002	0.005	0.028	0.001	0.020	298.788	0.420	NaN	1.133589	0.2378807E-01	-1.321904
09242011	17	0.027	0.030	0.045	0.000	0.001	0.001	0.002	0.005	0.028	0.001	0.021	297.453	0.444	NaN	1.328135	0.1612164E-01	-1.084167
09242011	18	0.036	0.033	0.041	0.000	0.001	0.001	0.002	0.005	0.028	0.001	0.021	296.051	0.467	NaN	1.657348	0.3717092E-02	-0.3507895
09242011	19	0.061	0.040	0.033	0.000	0.001	0.001	0.003	0.008	0.023	0.001	0.023	294.522	0.495	NaN	1.716422	0.2974965E-04	1.761142
09242011	20	0.097	0.046	0.029	0.000	0.001	0.002	0.004	0.014	0.013	0.001	0.024	293.211	0.534	NaN	1.512609	0.4920242E-05	2.487740
09242011	21	0.097	0.045	0.028	0.000	0.001	0.002	0.005	0.015	0.012	0.002	0.025	292.165	0.576	NaN	1.814529	0.5064124E-05	2.554260
09242011	22	0.091	0.040	0.026	0.000	0.001	0.002	0.005	0.015	0.013	0.003	0.026	291.463	0.604	NaN	2.012063	0.6608634E-05	2.483530
09242011	23	0.084	0.034	0.022	0.000	0.001	0.002	0.005	0.015	0.015	0.003	0.026	290.767	0.642	NaN	2.179446	0.7281297E-05	2.476137
09242011	24	0.075	0.028	0.018	0.000	0.001	0.002	0.005	0.014	0.016	0.003	0.026	290.276	0.667	NaN	2.361370	0.9748145E-05	2.384242
09252011	01	0.062	0.024	0.014	0.000	0.001	0.002	0.005	0.013	0.018	0.003	0.025	289.745	0.693	NaN	2.338154	0.1123119E-04	2.318447
09252011	02	0.051	0.022	0.013	0.000	0.001	0.002	0.004	0.012	0.020	0.003	0.025	289.422	0.710	NaN	2.602767	0.1794246E-04	2.161553
09252011	03	0.044	0.020	0.013	0.000	0.001	0.001	0.004	0.012	0.021	0.003	0.024	289.018	0.731	NaN	2.629788	0.2103324E-04	2.097015
09252011	04	0.041	0.019	0.014	0.000	0.001	0.001	0.004	0.011	0.021	0.003	0.024	288.737	0.748	NaN	3.079740	0.2912070E-04	2.024312
09252011	05	0.040	0.019	0.014	0.000	0.001	0.002	0.004	0.012	0.020	0.003	0.024	288.488	0.763	NaN	3.133541	0.2149363E-04	2.163726
09252011	06	0.038	0.020	0.015	0.001	0.001	0.002	0.005	0.013	0.018	0.004	0.024	288.279	0.775	0.1890981	2.112453	0.1117808E-04	2.276420
09252011	07	0.039	0.021	0.017	0.001	0.001	0.002	0.005	0.014	0.017	0.005	0.025	288.095	0.785	0.2069366	2.296054	0.1133496E-04	2.306562
09252011	08	0.041	0.024	0.021	0.001	0.001	0.002	0.005	0.015	0.016	0.005	0.026	289.565	0.758	0.1362341	1.940492	0.1216168E-04	2.202919
09252011	09	0.036	0.025	0.038	0.000	0.001	0.002	0.005	0.013	0.021	0.005	0.026	292.348	0.693	NaN	3.708545	0.1362767E-02	0.4347819
09252011	10	0.036	0.032	0.058	0.000	0.001	0.002	0.004	0.012	0.022	0.003	0.026	295.405	0.618	NaN	2.852872	0.1844046E-01	-0.8104895
09252011	11	0.029	0.078	0.073	0.000	0.001	0.002	0.004	0.010	0.027	0.002	0.027	298.605	0.535	NaN	2.104358	0.4192657E-01	-1.299370
09252011	12	0.015	0.089	0.071	0.000	0.001	0.001	0.003	0.007	0.033	0.001	0.026	300.359	0.501	NaN	1.580958	0.5511411E-01	-1.542342
09252011	13	0.011	0.062	0.066	0.000	0.001	0.001	0.002	0.006	0.029	0.000	0.022	302.127	0.473	NaN	1.214492	0.5235292E-01	-1.634546
09252011	14	0.009	0.043	0.053	0.000	0.001	0.001	0.002	0.004	0.023	0.000	0.017	302.951	0.468	NaN	1.000216	0.4129363E-01	-1.615789
09252011	15	0.005	0.029	0.040	0.000	0.000	0.001	0.001	0.003	0.022	0.000	0.016	302.697	0.486	0.5526125E-02	1.346789	0.4302877E-02	-0.5044595
09252011	16	0.003	0.022	0.029	0.000	0.000	0.000	0.001	0.003	0.021	0.000	0.016	301.903	0.511	0.7418394E-03	0.8065650	0.3262867E-02	-0.6069601
09252011	17	0.003	0.016	0.023	0.000	0.000	0.000	0.001	0.003	0.021	0.000	0.015	300.640	0.551	0.6266654E-02	1.017112	0.3186029E-02	-0.4958807
09252011	18	0.017	0.016	0.022	0.000	0.000	0.001	0.001	0.005	0.018	0.000	0.015	299.250	0.594	NaN	1.468444	0.2663653E-02	-0.2586201
09252011	19	0.059	0.025	0.023	0.000	0.001	0.002	0.003	0.010	0.006	0.000	0.016	297.558	0.643	NaN	1.648632	0.1012108E-04	2.211897
09252011	20	0.077	0.029	0.026	0.000	0.001	0.002	0.004	0.013	0.001	0.001	0.016	296.366	0.696	NaN	1.865293	0.6657986E-05	2.447404
09252011	21	0.058	0.023	0.020	0.001	0.001	0.002	0.004	0.013	0.001	0.001	0.016	295.769	0.755	0.4376388E-01	0.5077479	0.4556489E-06	3.047018
09252011	22	0.032	0.015	0.011	0.002	0.001	0.002	0.003	0.009	0.002	0.001	0.013	295.385	0.802	0.6771970E-01	0.8550836	0.8075717E-06	3.024827
09252011	23	0.019	0.013	0.005	0.002	0.001	0.001	0.002	0.006	0.003	0.000	0.011	295.020	0.843	0.1284802E-01	1.079549	0.1846446E-04	1.766906
09252011	24	0.009	0.008	0.004	0.001	0.001	0.001	0.002	0.004	0.006	0.000	0.009	294.198	0.912	0.2169192E-01	1.780589	0.2449161E-04	1.861546
09262011	01	0.004	0.006	0.004	0.001	0.001	0.000	0.001	0.002	0.010	0.000	0.008	293.816	0.942	0.3836232E-01	3.272844	0.4815481E-04	1.832286
09262011	02	0.007	0.004	0.004	0.000	0.001	0.000	0.001	0.001	0.007	0.000	0.006	293.832	0.949	NaN	5.087693	0.2445468E-03	1.318159
09262011	03	0.010	0.004	0.004	0.000	0.001	0.000	0.001	0.001	0.004	0.000	0.004	293.806	0.947	NaN	4.064913	0.7245297E-04	1.748995
09262011	04	0.012	0.005	0.004	0.001	0.001	0.000	0.001	0.001	0.004	0.000	0.004	293.774	0.943	0.2248037E-01	1.646222	0.1980702E-04	1.919669
09262011	05	0.022	0.006	0.005	0.001	0.001	0.000	0.001	0.001	0.005	0.000	0.004	293.780	0.939	0.4378313E-01	1.724595	0.1058692E-04	2.211918
09262011	06	0.041	0.010	0.005	0.001	0.001	0.001	0.001	0.001	0.005	0.001	0.005	293.792	0.941	0.1241690	2.437973	0.6040636E-05	2.605946
09262011	07	0.054	0.016	0.005	0.001	0.001	0.002	0.001	0.001	0.005	0.001	0.005	293.834	0.947	0.2824550	3.366143	0.3480275E-05	2.985519
09262011	08	0.035	0.022	0.008	0.001	0.001	0.001	0.001	0.001	0.007	0.001	0.006	295.177	0.914	0.4897976E-01	1.908505	0.1128322E-04	2.228260
09262011	09	0.037	0.029	0.017	0.001	0.001	0.001	0.001	0.001	0.011	0.001	0.008	296.869	0.820	0.1796836E-01	1.396347	0.2412922E-04	1.762450
09262011	10	0.021	0.036	0.031	0.001	0.001	0.001	0.001	0.001	0.017	0.001	0.011	298.319	0.753	0.7001996E-02	1.454546	0.8473297E-04	1.234675
09262011	11	0.025	0.032	0.054	0.001	0.001	0.001	0.001	0.001	0.019	0.001	0.012	299.615	0.689	0.4639745E-02	1.308539	0.1005788E-03	1.114280
09262011	12	0.019	0.034	0.077	0.001	0.001	0.001	0.001	0.002	0.025	0.001	0.016	300.448	0.639	0.4201412E-02	1.415879	0.1400366E-03	1.004784
09262011	13	0.013	0.032	0.081	0.001	0.001	0.001	0.001	0.003	0.029	0.001	0.019	302.470	0.543	0.3302813E-02	1.211223	0.1208976E-03	1.000806
09262011	14	0.005	0.031	0.060	0.000	0.001	0.001	0.001	0.003	0.029	0.001	0.019	303.543	0.492	NaN	1.176853	0.5442777E-01	-1.665098
09262011	15	0.008	0.028	0.046	0.000	0.001	0.001	0.001	0.004	0.025	0.000	0.017	303.168	0.501	NaN	1.129668	0.3384046E-01	-1.476485
09262011	16	0.015	0.029	0.041	0.000	0.001	0.001	0.001	0.004	0.021	0.000	0.016	302.310	0.529	NaN	1.303324	0.2300636E-01	-1.246795
09262011	17	0.025	0.031	0.035	0.000	0.001	0.001	0.002	0.005	0.019	0.000	0.017	301.091	0.566	NaN	1.744777	0.7091989E-02	-0.6090282
09262011	18	0.041	0.033	0.028	0.001	0.001	0.001	0.002	0.008	0.014	0.001	0.017	299.688	0.609	0.4473031E-02	0.8384783	0.4265445E-04	1.293527
09262011	19	0.070	0.045	0.021	0.001	0.001	0.002	0.004	0.014	0.003	0.001	0.017	298.217	0.661	0.2444899E-01	0.3162890	0.2222180E-06	3.153305
09262011	20	0.083	0.053	0.022	0.001	0.002	0.002	0.005	0.018	0.001	0.001	0.017	296.963	0.710	0.000000	0.2669380E-08	0.1000019E-13	2.426402
09262011	21	0.086	0.056	0.024	0.001	0.002	0.002	0.005	0.019	0.001	0.001	0.015	295.985	0.757	0.000000	0.2466428E-08	0.1000087E-13	2.392031
09262011	22	0.085	0.058	0.024	0.001	0.002	0.002	0.005	0.018	0.001	0.001	0.015	295.254	0.794	0.000000	0.2346813E-08	0.1880635E-18	7.096174
09262011	23	0.082	0.058	0.025	0.001	0.002	0.002	0.004	0.017	0.001	0.002	0.014	294.680	0.826	0.000000	0.2104734E-08	0.1682138E-18	7.097335
09262011	24	0.077	0.057	0.026	0.001	0.002	0.002	0.004	0.016	0.002	0.002	0.014	294.157	0.860	0.2576113E-03	0.1171484E-02	0.5894975E-08	2.298254
09272011	01	0.073	0.055	0.025	0.001	0.002	0.001	0.004	0.015	0.002	0.002	0.014	293.670	0.897	0.2100468E-03	0.1415210E-02	0.6944401E-08	2.309186
09272011	02	0.071	0.054	0.023	0.001	0.001	0.001	0.004	0.015	0.004	0.003	0.015	293.279	0.920	0.3820658E-03	0.3255884E-02	0.1394272E-07	2.368321
09272011	03	0.069	0.052	0.018	0.001	0.001	0.001	0.004	0.015	0.006	0.006	0.016	292.967	0.931	0.1933150	2.247459	0.3320520E-05	2.830486
09272011	04	0.071	0.049	0.014	0.001	0.001	0.001	0.004	0.015	0.009	0.008	0.017	292.677	0.937	0.3905613	5.064204	0.6426985E-05	2.896504
09272011	05	0.083	0.046	0.011	0.002	0.001	0.002	0.004	0.016	0.011	0.009	0.018	292.384	0.944	0.4636061	5.586987	0.6124515E-05	2.960106
09272011	06	0.106	0.043	0.007	0.003	0.002	0.002	0.004	0.018	0.013	0.011	0.018	292.164	0.947	0.5154406	5.860973	0.1155634E-04	2.705149
09272011	07	0.123	0.042	0.006	0.003	0.002	0.003	0.005	0.019	0.013	0.010	0.019	292.060	0.951	0.5476199	5.637031	0.9451677E-05	2.775542
09272011	08	0.105	0.040	0.016	0.002	0.002	0.003	0.005	0.019	0.010	0.009	0.020	293.824	0.881	0.8169407E-01	0.6735139	0.5226426E-06	3.110142
09272011	09	0.068	0.038	0.031	0.002	0.002	0.003	0.004	0.015	0.011	0.006	0.021	296.189	0.779	0.9523344E-01	1.404914	0.1441919E-05	2.988709
09272011	10	0.032	0.048	0.041	0.001	0.002	0.001	0.003	0.008	0.024	0.003	0.022	298.211	0.694	0.1147085E-01	1.652232	0.7567721E-04	1.339106
09272011	11	0.022	0.064	0.049	0.000	0.001	0.001	0.003	0.007	0.024	0.001	0.021	299.753	0.631	NaN	2.308316	0.2258300E-01	-0.9904865
09272011	12	0.025	0.052	0.053	0.000	0.001	0.001	0.003	0.007	0.023	0.002	0.021	300.832	0.595	NaN	2.138149	0.2572241E-01	-1.080274
09272011	13	0.026	0.042	0.047	0.001	0.001	0.001	0.003	0.007	0.022	0.002	0.021	301.719	0.560	0.3878236E-02	1.084302	0.7470648E-04	1.161792
09272011	14	0.026	0.035	0.037	0.001	0.001	0.001	0.003	0.008	0.023	0.002	0.022	301.306	0.554	0.4356265E-02	1.052772	0.6920170E-04	1.182218
09272011	15	0.026	0.026	0.035	0.001	0.001	0.001	0.003	0.007	0.028	0.002	0.024	300.595	0.567	0.6023467E-02	1.352873	0.9769078E-04	1.141403
09272011	16	0.026	0.019	0.033	0.000	0.001	0.001	0.003	0.007	0.031	0.001	0.025	299.588	0.586	NaN	2.412071	0.4521606E-02	-0.2729026
09272011	17	0.025	0.017	0.031	0.000	0.001	0.001	0.003	0.007	0.032	0.001	0.026	298.643	0.613	NaN	2.605940	0.4656425E-02	-0.2520882
09272011	18	0.032	0.014	0.025	0.000	0.001	0.001	0.003	0.009	0.030	0.001	0.027	297.369	0.643	NaN	2.838280	0.3121411E-03	0.9587043
09272011	19	0.059	0.017	0.025	0.000	0.001	0.002	0.004	0.013	0.022	0.001	0.028	296.012	0.675	NaN	3.050027	0.3926031E-04	1.890350
09272011	20	0.088	0.025	0.025	0.000	0.001	0.002	0.005	0.019	0.012	0.002	0.030	296.963	0.710	NaN	3.000003	0.1557377E-04	2.284728
09272011	21	0.091	0.027	0.024	0.001	0.002	0.003	0.006	0.020	0.015	0.003	0.032	295.985	0.757	0.9132630E-01	2.060795	0.6810726E-05	2.480841
09272011	22	0.085	0.026	0.023	0.001	0.002	0.002	0.006	0.019	0.021	0.004	0.034	295.254	0.794	0.1105250	2.800786	0.1504387E-04	2.269920
09272011	23	0.074	0.027	0.023	0.001	0.002	0.002	0.006	0.018	0.027	0.004	0.035	294.680	0.826	0.1534859	3.934170	0.2027689E-04	2.287852
09272011	24	0.062	0.029	0.024	0.001	0.002	0.002	0.006	0.018	0.033	0.005	0.036	294.157	0.860	0.1998155	5.225396	0.2446177E-04	2.329631
09282011	01	0.051	0.032	0.024	0.001	0.002	0.002	0.005	0.017	0.038	0.007	0.037	293.670	0.897	0.2831583	8.658265	0.3751195E-04	2.363261
09282011	02	0.041	0.035	0.023	0.001	0.002	0.002	0.005	0.017	0.043	0.010	0.038	293.279	0.920	0.3477799	12.14649	0.4986871E-04	2.386622
09282011	03	0.035	0.038	0.023	0.001	0.002	0.002	0.005	0.017	0.046	0.012	0.038	292.967	0.931	0.3932269	14.83983	0.5873938E-04	2.402499
09282011	04	0.036	0.040	0.020	0.002	0.002	0.002	0.005	0.017	0.048	0.014	0.038	292.677	0.937	0.4854800	18.89340	0.6262605E-04	2.479555
09282011	05	0.051	0.040	0.014	0.003	0.002	0.002	0.006	0.019	0.046	0.018	0.037	292.384	0.944	0.6061966	18.96895	0.3841406E-04	2.693553
09282011	06	0.086	0.039	0.006	0.004	0.002	0.003	0.006	0.021	0.037	0.019	0.035	292.164	0.947	0.7841466	21.29301	0.1964887E-04	3.034899
09282011	07	0.120	0.040	0.003	0.004	0.002	0.004	0.007	0.023	0.023	0.016	0.034	292.060	0.951	0.8327213	17.24706	0.9079087E-05	3.278673
09282011	08	0.106	0.040	0.010	0.003	0.003	0.004	0.008	0.024	0.018	0.016	0.032	293.824	0.881	0.4104095	4.457980	0.3218369E-05	3.141502
09282011	09	0.072	0.038	0.026	0.002	0.003	0.003	0.007	0.020	0.018	0.010	0.031	296.189	0.779	0.9900373E-01	2.173692	0.5226702E-05	2.618970
09282011	10	0.045	0.049	0.037	0.001	0.002	0.002	0.006	0.013	0.025	0.006	0.028	298.211	0.694	0.2078342E-01	1.809973	0.3328059E-04	1.735481
09282011	11	0.039	0.065	0.046	0.001	0.002	0.002	0.006	0.011	0.024	0.004	0.026	299.753	0.631	0.9276807E-02	1.471107	0.4421378E-04	1.522087
09282011	12	0.035	0.056	0.051	0.001	0.001	0.001	0.006	0.011	0.025	0.003	0.027	300.832	0.595	0.4606783E-02	1.330166	0.8698631E-04	1.184455
09282011	13	0.031	0.045	0.047	0.001	0.001	0.001	0.006	0.010	0.026	0.003	0.027	301.719	0.560	0.4372537E-02	1.247281	0.7815950E-04	1.202983
09282011	14	0.029	0.037	0.039	0.001	0.001	0.001	0.005	0.010	0.027	0.002	0.027	301.306	0.554	0.4958212E-02	1.231021	0.7956965E-04	1.189518
09282011	15	0.027	0.027	0.036	0.001	0.001	0.001	0.005	0.009	0.032	0.002	0.029	300.595	0.567	0.6763160E-02	1.545034	0.1083223E-03	1.154220
09282011	16	0.026	0.020	0.033	0.000	0.001	0.001	0.004	0.008	0.035	0.001	0.029	299.588	0.586	NaN	2.605596	0.5183794E-02	-0.2987407
09282011	17	0.025	0.018	0.030	0.000	0.001	0.001	0.004	0.008	0.036	0.001	0.029	298.643	0.613	NaN	2.788137	0.3307107E-02	-0.7413414E-01
09282011	18	0.032	0.014	0.024	0.000	0.001	0.001	0.004	0.009	0.033	0.001	0.029	297.369	0.643	NaN	2.970233	0.3086853E-03	0.9832746
09282011	19	0.059	0.017	0.025	0.000	0.001	0.002	0.005	0.014	0.025	0.001	0.030	296.012	0.675	NaN	3.143681	0.3869543E-04	1.909779
09282011	20	0.088	0.020	0.027	0.000	0.002	0.002	0.006	0.021	0.013	0.003	0.032	294.964	0.714	NaN	3.182711	0.1267390E-04	2.399887
09282011	21	0.083	0.018	0.023	0.001	0.002	0.003	0.007	0.023	0.008	0.004	0.032	294.031	0.760	0.1432968	1.731052	0.2371551E-05	2.863278
09282011	22	0.076	0.016	0.018	0.001	0.002	0.003	0.008	0.024	0.007	0.005	0.032	293.297	0.799	0.2221655	1.984221	0.1526688E-05	3.113840
09282011	23	0.069	0.016	0.015	0.001	0.002	0.003	0.008	0.023	0.008	0.005	0.032	292.634	0.834	0.2475190	2.480523	0.2656071E-05	2.970304
09282011	24	0.068	0.017	0.013	0.001	0.002	0.002	0.008	0.022	0.012	0.006	0.032	292.032	0.867	0.2979373	3.553351	0.5507037E-05	2.809720
09292011	01	0.068	0.018	0.010	0.001	0.002	0.002	0.008	0.021	0.017	0.008	0.031	291.353	0.915	0.5350685	7.169720	0.7917126E-05	2.956935
09292011	02	0.067	0.019	0.007	0.002	0.002	0.002	0.008	0.020	0.022	0.011	0.031	290.806	0.946	0.7520525	15.20090	0.1374614E-04	3.043689
09292011	03	0.066	0.021	0.005	0.002	0.002	0.002	0.008	0.020	0.027	0.016	0.031	290.404	0.958	0.8417825	22.40181	0.1797385E-04	3.095642
09292011	04	0.069	0.022	0.005	0.002	0.002	0.002	0.008	0.021	0.029	0.019	0.031	290.083	0.963	0.8659804	23.81843	0.1788668E-04	3.124383
09292011	05	0.082	0.025	0.004	0.002	0.002	0.002	0.008	0.023	0.030	0.025	0.031	289.852	0.959	0.8987931	25.96099	0.1699316E-04	3.184047
09292011	06	0.100	0.028	0.004	0.002	0.002	0.003	0.009	0.026	0.031	0.029	0.032	289.650	0.956	0.9199030	27.77890	0.1666851E-04	3.221818
09292011	07	0.102	0.029	0.005	0.003	0.003	0.005	0.010	0.030	0.032	0.030	0.032	289.511	0.948	0.8672727	19.58929	0.1963295E-04	2.999033
09292011	08	0.084	0.027	0.015	0.002	0.003	0.005	0.010	0.032	0.029	0.027	0.032	290.861	0.891	0.3474733	3.274004	0.8869904E-05	2.567160
09292011	09	0.066	0.026	0.032	0.001	0.003	0.004	0.010	0.028	0.013	0.013	0.031	293.573	0.779	0.5974561E-01	0.6460641	0.5163926E-06	3.097296
09292011	10	0.050	0.033	0.042	0.001	0.002	0.003	0.008	0.019	0.012	0.009	0.028	296.763	0.638	0.4039341E-01	1.043003	0.2091190E-05	2.697892
09292011	11	0.039	0.042	0.053	0.001	0.002	0.002	0.007	0.014	0.016	0.005	0.026	298.609	0.559	0.8791208E-02	0.9370494	0.2034026E-04	1.663406
09292011	12	0.031	0.035	0.050	0.000	0.001	0.001	0.006	0.011	0.023	0.004	0.026	299.920	0.520	NaN	1.763070	0.1751949E-01	-0.9972520
09292011	13	0.026	0.031	0.046	0.000	0.001	0.001	0.005	0.010	0.028	0.002	0.027	301.312	0.480	NaN	1.545954	0.1652149E-01	-1.028853
09292011	14	0.021	0.029	0.044	0.000	0.001	0.001	0.004	0.009	0.031	0.001	0.028	301.834	0.463	NaN	1.442022	0.2099304E-01	-1.163104
09292011	15	0.020	0.026	0.045	0.000	0.001	0.001	0.004	0.008	0.034	0.001	0.029	300.341	0.477	NaN	1.633862	0.2431068E-01	-1.172582
09292011	16	0.023	0.024	0.045	0.000	0.001	0.001	0.004	0.009	0.035	0.001	0.030	300.169	0.498	NaN	1.838767	0.1971718E-01	-1.030318
09292011	17	0.028	0.022	0.041	0.000	0.001	0.001	0.005	0.010	0.035	0.001	0.031	298.603	0.527	NaN	2.171634	0.9786616E-02	-0.6538460
09292011	18	0.050	0.021	0.035	0.000	0.001	0.002	0.006	0.014	0.022	0.001	0.030	297.567	0.557	NaN	2.285556	0.6593469E-04	1.539878
09292011	19	0.074	0.022	0.028	0.000	0.002	0.003	0.008	0.023	0.004	0.002	0.029	296.075	0.597	NaN	1.509629	0.4145750E-05	2.561267
09292011	20	0.083	0.024	0.027	0.001	0.002	0.003	0.010	0.030	0.001	0.002	0.028	294.964	0.714	0.000000	0.3455570E-08	0.1000169E-13	2.538446
09292011	21	0.074	0.021	0.022	0.001	0.002	0.004	0.011	0.032	0.002	0.002	0.027	294.031	0.760	0.000000	0.2767198E-08	0.1000028E-13	2.442028
09292011	22	0.070	0.020	0.017	0.001	0.002	0.003	0.011	0.031	0.002	0.003	0.026	293.297	0.799	0.000000	0.2422454E-08	0.1000234E-13	2.384154
09292011	23	0.068	0.020	0.015	0.001	0.002	0.003	0.010	0.029	0.002	0.003	0.026	292.634	0.834	0.000000	0.2299692E-08	0.1702984E-18	7.130459
09292011	24	0.070	0.022	0.014	0.001	0.002	0.003	0.010	0.026	0.003	0.003	0.026	292.032	0.867	0.1220107E-03	0.3754506E-03	0.1586100E-08	2.374222
