# Supplementary material for: Understanding nitrate formation in a world with less sulfate
Source: Copernicus journal article supplement (doi:10.5194/acp-18-12765-2018), 2018-09-05
Supplement: Supplementary file 2 [file acp-18-12765-2018-supplement.zip › DATA/RAW DATA FOR DIURNALS/data_extract_SOAS_aug_mod.csv]

Date	Hour	NH3	SO2	HNO3	CL	NA	MG	K	CA	NH4	NO3	SO4	T	RH	e_NO3	Water	H+	pH
08022011	01	0.001	0.009	0.009	0.000	0.001	0.000	0.001	0.000	0.022	0.000	0.027	299.510	0.849	0.5123615E-03	6.435614	0.7260035E-02	-0.5234871E-01
08022011	02	0.001	0.008	0.008	0.000	0.001	0.000	0.001	0.001	0.023	0.000	0.027	299.029	0.884	0.1070499E-02	7.402714	0.6767500E-02	0.3896271E-01
08022011	03	0.001	0.007	0.007	0.000	0.001	0.000	0.002	0.001	0.024	0.000	0.027	298.680	0.902	0.2121389E-02	8.648491	0.6442064E-02	0.1279153
08022011	04	0.001	0.007	0.006	0.000	0.001	0.000	0.002	0.001	0.026	0.000	0.027	298.376	0.912	0.3252089E-02	9.487367	0.6096284E-02	0.1920805
08022011	05	0.001	0.006	0.006	0.000	0.001	0.000	0.002	0.001	0.028	0.000	0.028	298.099	0.921	0.4617393E-02	10.97558	0.6299226E-02	0.2411402
08022011	06	0.002	0.006	0.006	0.000	0.001	0.000	0.002	0.001	0.030	0.000	0.028	297.865	0.929	0.8066833E-02	12.38499	0.5865023E-02	0.3246259
08022011	07	0.002	0.007	0.006	0.000	0.002	0.000	0.002	0.001	0.033	0.000	0.027	298.237	0.937	0.1698154E-01	13.75305	0.5075249E-02	0.4329417
08022011	08	0.002	0.008	0.010	0.000	0.002	0.000	0.002	0.001	0.036	0.000	0.027	300.209	0.888	0.6555676E-02	7.504590	0.4803764E-02	0.1937453
08022011	09	0.002	0.024	0.014	0.000	0.002	0.000	0.002	0.001	0.029	0.000	0.025	301.818	0.830	0.1303077E-02	4.575999	0.4357528E-02	0.2124573E-01
08022011	10	0.001	0.041	0.022	0.000	0.002	0.000	0.001	0.001	0.022	0.000	0.024	303.450	0.761	0.1776814E-03	3.295024	0.3271796E-02	0.3072323E-02
08022011	11	0.001	0.036	0.024	0.000	0.002	0.000	0.001	0.000	0.018	0.000	0.022	305.134	0.687	0.3069639E-04	2.411064	0.2559770E-02	-0.2599225E-01
08022011	12	0.000	0.033	0.025	0.000	0.001	0.000	0.001	0.000	0.014	0.000	0.021	306.476	0.633	0.4172325E-05	2.235487	0.5764482E-02	-0.4113881
08022011	13	0.000	0.039	0.026	0.000	0.001	0.000	0.001	0.000	0.012	0.000	0.022	307.849	0.580	0.1609325E-05	2.226435	0.8554980E-02	-0.5846089
08022011	14	0.000	0.044	0.026	0.000	0.001	0.000	0.001	0.000	0.011	0.000	0.023	308.749	0.543	0.8940697E-06	2.214746	0.1047836E-01	-0.6749693
08022011	15	0.000	0.050	0.027	0.000	0.001	0.000	0.000	0.000	0.011	0.000	0.024	309.024	0.525	0.000000	2.366387	0.1254597E-01	-0.7244186
08022011	16	0.000	0.051	0.028	0.000	0.001	0.000	0.000	0.000	0.011	0.000	0.026	308.665	0.532	0.000000	2.640735	0.1461762E-01	-0.7431519
08022011	17	0.000	0.043	0.025	0.000	0.001	0.000	0.001	0.001	0.012	0.000	0.027	308.190	0.541	0.1072884E-05	2.556157	0.1255528E-01	-0.6912388
08022011	18	0.000	0.042	0.024	0.000	0.001	0.000	0.001	0.001	0.014	0.000	0.031	307.871	0.545	0.1311302E-05	3.035615	0.1467432E-01	-0.6843113
08022011	19	0.000	0.028	0.024	0.000	0.000	0.000	0.001	0.001	0.013	0.000	0.034	306.693	0.557	0.2145767E-05	3.698288	0.1989525E-01	-0.7307487
08022011	20	0.000	0.008	0.018	0.000	0.000	0.000	0.001	0.001	0.012	0.000	0.033	304.777	0.612	0.4827976E-05	4.104361	0.2013837E-01	-0.6907788
08022011	21	0.000	0.002	0.012	0.000	0.000	0.000	0.001	0.000	0.012	0.000	0.026	303.458	0.668	0.1001358E-04	3.702066	0.1415720E-01	-0.5825332
08022011	22	0.000	0.001	0.008	0.000	0.000	0.000	0.001	0.000	0.011	0.000	0.018	302.445	0.720	0.1835823E-04	2.727733	0.7105508E-02	-0.4157933
08022011	23	0.000	0.000	0.005	0.000	0.000	0.000	0.000	0.000	0.010	0.000	0.014	301.521	0.777	0.4297495E-04	2.574803	0.5125022E-02	-0.2989517
08022011	24	0.001	0.000	0.004	0.000	0.000	0.000	0.000	0.000	0.009	0.000	0.011	300.805	0.834	0.1263022E-03	2.334635	0.2639860E-02	-0.5336186E-01
08032011	01	0.001	0.000	0.002	0.000	0.000	0.000	0.000	0.000	0.008	0.000	0.008	300.200	0.891	0.5174279E-03	2.406291	0.1477592E-02	0.2117937
08032011	02	0.001	0.000	0.002	0.000	0.000	0.000	0.000	0.000	0.006	0.000	0.006	299.835	0.912	0.6859303E-03	2.175926	0.1109457E-02	0.2925335
08032011	03	0.001	0.000	0.001	0.000	0.000	0.000	0.000	0.000	0.006	0.000	0.005	299.562	0.926	0.1740217E-02	2.257412	0.6564529E-03	0.5364074
08032011	04	0.001	0.000	0.001	0.000	0.000	0.000	0.000	0.000	0.005	0.000	0.004	299.290	0.948	0.3480136E-02	2.531646	0.4548667E-03	0.7455187
08032011	05	0.002	0.000	0.001	0.000	0.000	0.000	0.000	0.000	0.005	0.000	0.004	299.175	0.941	0.6373346E-02	2.145528	0.2286446E-03	0.9723731
08032011	06	0.002	0.000	0.001	0.000	0.000	0.000	0.000	0.000	0.006	0.000	0.004	298.975	0.927	0.1076579E-02	1.869159	0.4787151E-03	0.5915691
08032011	07	0.001	0.000	0.001	0.000	0.000	0.000	0.000	0.000	0.008	0.000	0.004	299.313	0.913	0.6814599E-03	1.454545	0.4356247E-03	0.5236148
08032011	08	0.001	0.000	0.002	0.000	0.000	0.000	0.000	0.000	0.008	0.000	0.006	300.887	0.881	0.8208752E-03	1.570681	0.6257209E-03	0.3997073
08032011	09	0.001	0.001	0.004	0.000	0.000	0.000	0.000	0.000	0.007	0.000	0.009	302.589	0.834	0.8565187E-04	1.928131	0.2198762E-02	-0.5704179E-01
08032011	10	0.001	0.005	0.006	0.000	0.001	0.000	0.000	0.000	0.010	0.000	0.012	304.381	0.759	0.000000	1.745600	0.2270713E-02	-0.1142174
08032011	11	0.001	0.012	0.007	0.000	0.001	0.000	0.000	0.001	0.013	0.000	0.015	306.435	0.651	0.1871586E-04	1.306911	0.1473444E-02	-0.5208750E-01
08032011	12	0.001	0.025	0.010	0.000	0.001	0.000	0.000	0.001	0.016	0.000	0.016	307.588	0.594	0.2110004E-04	1.099085	0.1433478E-02	-0.1153598
08032011	13	0.001	0.025	0.011	0.000	0.000	0.000	0.000	0.000	0.017	0.000	0.016	308.644	0.558	0.1102686E-04	1.037248	0.2815178E-03	0.5663767
08032011	14	0.001	0.026	0.011	0.000	0.000	0.000	0.000	0.000	0.017	0.000	0.016	309.182	0.540	0.8881092E-05	0.9642481	0.2275697E-03	0.6270744
08032011	15	0.001	0.023	0.010	0.000	0.000	0.000	0.000	0.000	0.018	0.000	0.016	308.986	0.538	0.1257658E-04	0.9528495	0.2550165E-03	0.5724560
08032011	16	0.001	0.019	0.008	0.000	0.000	0.000	0.000	0.000	0.020	0.000	0.016	308.668	0.536	0.1984835E-04	0.9300524	0.3936211E-03	0.3734290
08032011	17	0.002	0.020	0.007	0.000	0.001	0.000	0.001	0.000	0.021	0.000	0.016	307.926	0.540	0.4547834E-04	0.9241679	0.2983173E-02	-0.5089276
08032011	18	0.003	0.020	0.006	0.001	0.001	0.000	0.001	0.000	0.023	0.000	0.016	306.856	0.571	0.000000	1.125382	0.4068084E-02	-0.5580898
08032011	19	0.004	0.014	0.004	0.001	0.001	0.000	0.001	0.000	0.023	0.000	0.015	305.441	0.664	0.000000	1.508461	0.4082588E-02	-0.4324017
08032011	20	0.004	0.008	0.003	0.001	0.001	0.000	0.001	0.000	0.022	0.000	0.014	303.787	0.683	0.1878399E-01	1.532261	0.2312839E-04	1.821187
08032011	21	0.003	0.004	0.002	0.001	0.001	0.000	0.001	0.000	0.019	0.000	0.013	303.133	0.686	0.000000	1.410071	0.3359413E-02	-0.3770225
08032011	22	0.002	0.002	0.001	0.001	0.001	0.000	0.001	0.000	0.015	0.000	0.011	302.415	0.718	0.000000	1.291054	0.2843097E-02	-0.3428474
08032011	23	0.002	0.002	0.001	0.001	0.001	0.000	0.001	0.000	0.013	0.000	0.010	301.912	0.752	0.000000	1.314352	0.2597937E-02	-0.2959170
08032011	24	0.002	0.001	0.001	0.001	0.001	0.000	0.001	0.000	0.012	0.000	0.010	301.385	0.793	0.000000	1.541466	0.2456978E-02	-0.2024672
08042011	01	0.002	0.001	0.001	0.001	0.002	0.000	0.001	0.000	0.012	0.000	0.010	300.819	0.838	0.000000	2.045454	0.2497051E-02	-0.8663775E-01
08042011	02	0.002	0.002	0.001	0.001	0.002	0.000	0.001	0.000	0.012	0.000	0.010	300.280	0.870	0.000000	2.489484	0.2476202E-02	0.2323204E-02
08042011	03	0.002	0.005	0.001	0.001	0.003	0.000	0.001	0.000	0.012	0.000	0.011	299.980	0.870	0.000000	2.730178	0.2545798E-02	0.3036701E-01
08042011	04	0.002	0.008	0.002	0.001	0.004	0.000	0.001	0.000	0.013	0.000	0.012	299.643	0.863	0.000000	2.792490	0.2639559E-02	0.2446020E-01
08042011	05	0.002	0.011	0.002	0.001	0.005	0.000	0.001	0.001	0.015	0.000	0.014	299.436	0.861	0.000000	3.069932	0.2726046E-02	0.5159554E-01
08042011	06	0.002	0.015	0.002	0.001	0.006	0.000	0.001	0.001	0.017	0.000	0.016	299.161	0.854	0.000000	3.319293	0.2979296E-02	0.4693198E-01
08042011	07	0.002	0.020	0.003	0.001	0.006	0.000	0.001	0.001	0.020	0.000	0.018	299.262	0.847	0.000000	3.741234	0.3304661E-02	0.5388790E-01
08042011	08	0.001	0.040	0.010	0.001	0.006	0.000	0.001	0.001	0.021	0.000	0.022	300.590	0.809	0.000000	3.765478	0.3839268E-02	-0.8428369E-02
08042011	09	0.001	0.084	0.027	0.000	0.004	0.000	0.001	0.001	0.019	0.000	0.024	301.925	0.773	0.1820922E-03	3.517249	0.3559916E-02	-0.5236614E-02
08042011	10	0.001	0.082	0.029	0.000	0.002	0.000	0.001	0.001	0.016	0.000	0.019	303.170	0.738	0.1034141E-03	2.388585	0.2477681E-02	-0.1590477E-01
08042011	11	0.001	0.061	0.023	0.000	0.001	0.000	0.001	0.001	0.016	0.000	0.016	304.426	0.702	0.9453297E-04	1.626973	0.2094330E-02	-0.1096648
08042011	12	0.001	0.041	0.020	0.000	0.001	0.000	0.000	0.001	0.016	0.000	0.014	305.412	0.676	0.8314848E-04	1.282240	0.2365499E-02	-0.2659534
08042011	13	0.001	0.033	0.019	0.000	0.001	0.000	0.000	0.001	0.017	0.000	0.015	306.128	0.655	0.6663799E-04	1.285086	0.2283718E-02	-0.2497103
08042011	14	0.001	0.026	0.019	0.000	0.001	0.000	0.001	0.001	0.017	0.000	0.015	306.103	0.656	0.8755922E-04	1.262463	0.2418511E-02	-0.2823293
08042011	15	0.002	0.026	0.022	0.000	0.001	0.000	0.001	0.001	0.018	0.000	0.015	305.629	0.666	0.1543760E-03	1.300201	0.3071728E-02	-0.3733722
08042011	16	0.002	0.031	0.028	0.000	0.001	0.000	0.001	0.002	0.019	0.000	0.017	304.953	0.681	0.1575351E-03	1.429763	0.3052332E-02	-0.3293677
08042011	17	0.002	0.042	0.033	0.000	0.001	0.000	0.001	0.002	0.020	0.000	0.019	303.997	0.700	0.1606941E-03	1.790043	0.2839858E-02	-0.2004332
08042011	18	0.001	0.065	0.034	0.000	0.001	0.000	0.001	0.003	0.022	0.000	0.022	302.844	0.723	0.1779795E-03	2.204053	0.2786970E-02	-0.1019103
08042011	19	0.001	0.103	0.034	0.000	0.002	0.001	0.002	0.004	0.024	0.000	0.026	301.567	0.751	0.4683733E-03	2.952931	0.3292467E-02	-0.4726809E-01
08042011	20	0.001	0.133	0.027	0.000	0.002	0.001	0.002	0.004	0.028	0.000	0.030	300.670	0.766	0.5832314E-03	3.818091	0.3754709E-02	0.7269986E-02
08042011	21	0.001	0.151	0.020	0.001	0.002	0.001	0.002	0.005	0.031	0.000	0.033	300.100	0.782	0.000000	4.276142	0.4129508E-02	0.1515384E-01
08042011	22	0.002	0.155	0.019	0.001	0.002	0.001	0.003	0.006	0.035	0.001	0.035	299.657	0.807	0.000000	4.972501	0.4630599E-02	0.3093776E-01
08042011	23	0.002	0.148	0.019	0.000	0.003	0.001	0.003	0.008	0.037	0.001	0.036	299.449	0.823	0.3521681E-02	5.110934	0.4616930E-02	0.4414699E-01
08042011	24	0.003	0.144	0.019	0.000	0.003	0.001	0.004	0.009	0.039	0.001	0.037	299.257	0.839	0.9230554E-02	5.802079	0.4460045E-02	0.1142444
08052011	01	0.003	0.146	0.020	0.000	0.003	0.002	0.004	0.010	0.040	0.001	0.038	299.070	0.853	0.2009374E-01	6.263306	0.4305015E-02	0.1628290
08052011	02	0.003	0.155	0.019	0.000	0.004	0.002	0.004	0.011	0.040	0.001	0.040	298.858	0.867	0.2167064E-01	7.371675	0.4269322E-02	0.2372072
08052011	03	0.003	0.178	0.018	0.000	0.004	0.002	0.005	0.011	0.041	0.001	0.042	298.655	0.877	0.1920855E-01	8.408287	0.4493437E-02	0.2721289
08052011	04	0.002	0.239	0.023	0.000	0.004	0.002	0.005	0.011	0.043	0.001	0.046	298.452	0.886	0.1144141E-01	10.13403	0.5253706E-02	0.2853163
08052011	05	0.002	0.273	0.020	0.000	0.004	0.002	0.005	0.011	0.045	0.001	0.050	298.248	0.894	0.8755326E-02	11.28563	0.5967753E-02	0.2767151
08052011	06	0.002	0.303	0.020	0.000	0.004	0.002	0.005	0.011	0.048	0.001	0.054	298.058	0.901	0.9435177E-02	13.70496	0.6825254E-02	0.3027591
08052011	07	0.002	0.314	0.020	0.000	0.005	0.002	0.005	0.012	0.052	0.001	0.057	298.359	0.908	0.1354235E-01	15.80726	0.7034781E-02	0.3516061
08052011	08	0.002	0.368	0.030	0.000	0.005	0.002	0.005	0.012	0.056	0.001	0.061	299.828	0.857	0.4933178E-02	11.37209	0.7218486E-02	0.1973942
08052011	09	0.001	0.614	0.069	0.000	0.005	0.001	0.004	0.008	0.056	0.000	0.066	301.269	0.799	0.1007617E-02	10.00544	0.7888727E-02	0.1032295
08052011	10	0.001	0.560	0.069	0.000	0.003	0.001	0.003	0.005	0.051	0.000	0.062	302.866	0.729	0.2305508E-03	7.288972	0.6060860E-02	0.8013205E-01
08052011	11	0.000	0.455	0.065	0.000	0.002	0.001	0.002	0.004	0.044	0.000	0.057	304.108	0.684	0.5644560E-04	5.952429	0.6744029E-02	-0.5422521E-01
08052011	12	0.000	0.355	0.056	0.000	0.001	0.000	0.001	0.003	0.037	0.000	0.051	305.296	0.641	0.1329184E-04	5.041470	0.1075350E-01	-0.3289925
08052011	13	0.000	0.264	0.047	0.000	0.001	0.000	0.001	0.003	0.031	0.000	0.045	306.382	0.603	0.5125999E-05	3.972628	0.1011055E-01	-0.4056967
08052011	14	0.000	0.226	0.041	0.000	0.001	0.000	0.001	0.003	0.029	0.000	0.043	306.868	0.583	0.3337860E-05	3.591141	0.9905967E-02	-0.4406645
08052011	15	0.000	0.185	0.037	0.000	0.001	0.000	0.001	0.002	0.028	0.000	0.041	306.657	0.580	0.3278255E-05	3.519763	0.9888686E-02	-0.4486252
08052011	16	0.000	0.143	0.033	0.000	0.001	0.000	0.001	0.002	0.026	0.000	0.039	306.036	0.591	0.3755093E-05	3.481236	0.9922949E-02	-0.4549073
08052011	17	0.000	0.116	0.029	0.000	0.001	0.000	0.001	0.002	0.026	0.000	0.038	305.036	0.611	0.5722046E-05	3.537039	0.9066617E-02	-0.4088054
08052011	18	0.000	0.102	0.023	0.000	0.001	0.000	0.001	0.003	0.027	0.000	0.038	303.780	0.638	0.1132488E-04	3.635439	0.7402604E-02	-0.3088276
08052011	19	0.000	0.093	0.018	0.000	0.001	0.001	0.001	0.003	0.028	0.000	0.038	302.379	0.684	0.3898144E-04	4.061647	0.5396895E-02	-0.1234418
08052011	20	0.000	0.087	0.015	0.001	0.001	0.001	0.002	0.004	0.030	0.000	0.041	301.387	0.689	0.000000	4.352395	0.5004875E-02	-0.6066501E-01
08052011	21	0.000	0.096	0.014	0.001	0.001	0.001	0.002	0.005	0.032	0.000	0.044	300.648	0.710	0.000000	4.919718	0.5668325E-02	-0.6151452E-01
08052011	22	0.000	0.096	0.013	0.001	0.001	0.001	0.003	0.006	0.034	0.001	0.046	299.971	0.738	0.000000	5.496942	0.5407412E-02	0.7131733E-02
08052011	23	0.001	0.088	0.013	0.001	0.001	0.001	0.003	0.006	0.036	0.001	0.048	299.527	0.756	0.000000	6.174808	0.5886147E-02	0.2079238E-01
08052011	24	0.001	0.085	0.013	0.000	0.001	0.001	0.004	0.007	0.038	0.001	0.048	299.065	0.780	0.5527139E-03	6.437274	0.5408224E-02	0.7564736E-01
08062011	01	0.001	0.085	0.014	0.000	0.002	0.001	0.004	0.008	0.039	0.001	0.049	298.582	0.810	0.1003444E-02	7.409535	0.6160810E-02	0.8015319E-01
08062011	02	0.001	0.083	0.014	0.000	0.002	0.002	0.005	0.009	0.041	0.001	0.049	298.222	0.830	0.2090037E-02	7.903888	0.5795849E-02	0.1347237
08062011	03	0.001	0.079	0.013	0.000	0.002	0.002	0.005	0.010	0.042	0.001	0.049	298.018	0.840	0.2729118E-02	8.076651	0.5750557E-02	0.1475214
08062011	04	0.001	0.075	0.012	0.000	0.003	0.002	0.005	0.010	0.043	0.001	0.049	297.911	0.844	0.3169954E-02	8.034273	0.5735448E-02	0.1463793
08062011	05	0.002	0.071	0.012	0.000	0.003	0.002	0.005	0.011	0.045	0.001	0.049	297.870	0.845	0.4954338E-02	8.167903	0.5572793E-02	0.1660377
08062011	06	0.002	0.069	0.012	0.000	0.003	0.002	0.006	0.011	0.046	0.001	0.049	297.870	0.846	0.5974710E-02	8.146210	0.5428191E-02	0.1763004
08062011	07	0.003	0.064	0.011	0.000	0.003	0.002	0.006	0.012	0.049	0.001	0.049	298.301	0.858	0.1249200E-01	8.602534	0.5130246E-02	0.2244882
08062011	08	0.003	0.056	0.012	0.000	0.003	0.002	0.006	0.012	0.050	0.001	0.048	300.442	0.805	0.9436071E-02	6.389415	0.5208546E-02	0.8874454E-01
08062011	09	0.001	0.119	0.061	0.000	0.003	0.001	0.004	0.007	0.042	0.001	0.046	302.128	0.743	0.5625486E-03	5.017560	0.4625425E-02	0.3534091E-01
08062011	10	0.001	0.180	0.077	0.000	0.003	0.001	0.002	0.005	0.034	0.000	0.044	303.925	0.680	0.9870529E-04	4.137326	0.3224963E-02	0.1081950
08062011	11	0.000	0.192	0.070	0.000	0.002	0.001	0.002	0.004	0.028	0.000	0.044	305.522	0.626	0.1221895E-04	4.125668	0.7446398E-02	-0.2564520
08062011	12	0.000	0.116	0.058	0.000	0.001	0.000	0.001	0.003	0.023	0.000	0.048	306.442	0.596	0.4947186E-05	5.093204	0.2127895E-01	-0.6209590
08062011	13	0.000	0.026	0.037	0.000	0.001	0.000	0.001	0.002	0.017	0.000	0.045	306.467	0.581	0.3695488E-05	5.003899	0.2525098E-01	-0.7029697
08062011	14	0.000	0.003	0.019	0.000	0.000	0.000	0.001	0.002	0.014	0.000	0.036	306.563	0.588	0.3278255E-05	4.055750	0.2001816E-01	-0.6933531
08062011	15	0.000	0.001	0.013	0.000	0.000	0.000	0.001	0.001	0.012	0.000	0.028	306.039	0.613	0.3576279E-05	3.299208	0.1486902E-01	-0.6538725
08062011	16	0.000	0.001	0.009	0.000	0.000	0.000	0.000	0.001	0.009	0.000	0.021	305.683	0.635	0.4231930E-05	2.693999	0.1181711E-01	-0.6421138
08062011	17	0.000	0.000	0.006	0.000	0.000	0.000	0.000	0.001	0.007	0.000	0.016	305.036	0.668	0.5066395E-05	2.170508	0.8721547E-02	-0.6040322
08062011	18	0.000	0.000	0.004	0.000	0.000	0.000	0.000	0.000	0.006	0.000	0.012	304.007	0.717	0.9119511E-05	1.983385	0.6603862E-02	-0.5223908
08062011	19	0.000	0.000	0.004	0.000	0.000	0.000	0.000	0.000	0.007	0.000	0.011	302.576	0.770	0.2330542E-04	2.021154	0.4751865E-02	-0.3712646
08062011	20	0.001	0.000	0.004	0.000	0.000	0.000	0.000	0.000	0.007	0.000	0.009	301.158	0.852	0.1361370E-03	2.161789	0.2379090E-02	-0.4159747E-01
08062011	21	0.001	0.001	0.004	0.000	0.000	0.000	0.001	0.001	0.010	0.000	0.012	300.372	0.886	0.6508231E-03	3.329035	0.2957970E-02	0.5132461E-01
08062011	22	0.001	0.001	0.006	0.000	0.000	0.000	0.001	0.001	0.013	0.000	0.017	299.908	0.889	0.6585717E-03	5.035326	0.4895261E-02	0.1225182E-01
08062011	23	0.001	0.002	0.006	0.001	0.000	0.000	0.001	0.002	0.016	0.000	0.022	299.548	0.893	0.000000	6.371167	0.6396666E-02	-0.1734670E-02
08062011	24	0.001	0.002	0.006	0.001	0.001	0.000	0.001	0.002	0.019	0.000	0.026	299.275	0.893	0.000000	7.624169	0.7400153E-02	0.1295181E-01
08072011	01	0.001	0.004	0.006	0.001	0.001	0.001	0.002	0.003	0.021	0.000	0.030	298.987	0.899	0.000000	9.224744	0.7278777E-02	0.1028959
08072011	02	0.001	0.005	0.006	0.001	0.001	0.001	0.002	0.003	0.024	0.000	0.033	298.762	0.903	0.000000	10.22809	0.8060395E-02	0.1034381
08072011	03	0.001	0.006	0.006	0.001	0.001	0.001	0.002	0.004	0.026	0.000	0.035	298.544	0.918	0.000000	13.25442	0.8345759E-02	0.2008948
08072011	04	0.001	0.007	0.005	0.001	0.001	0.001	0.002	0.004	0.027	0.000	0.035	298.518	0.912	0.000000	11.45691	0.7801645E-02	0.1668813
08072011	05	0.001	0.007	0.005	0.001	0.001	0.001	0.002	0.004	0.028	0.000	0.034	298.476	0.912	0.000000	10.98724	0.6921049E-02	0.2007167
08072011	06	0.001	0.006	0.004	0.001	0.002	0.001	0.002	0.004	0.029	0.000	0.033	298.297	0.934	0.000000	13.38354	0.6370085E-02	0.3224256
08072011	07	0.002	0.006	0.003	0.001	0.002	0.001	0.002	0.004	0.031	0.000	0.032	298.733	0.930	0.000000	12.70968	0.5433654E-02	0.3690427
08072011	08	0.002	0.007	0.004	0.001	0.003	0.001	0.002	0.004	0.033	0.000	0.032	300.257	0.894	0.000000	8.124294	0.4933318E-02	0.2166466
08072011	09	0.002	0.016	0.012	0.001	0.003	0.001	0.002	0.004	0.030	0.000	0.029	301.469	0.865	0.000000	6.150635	0.4493445E-02	0.1363405
08072011	10	0.001	0.022	0.019	0.000	0.002	0.000	0.001	0.003	0.022	0.000	0.025	302.842	0.812	0.3932714E-03	3.953785	0.3798907E-02	0.1735445E-01
08072011	11	0.000	0.021	0.021	0.000	0.001	0.000	0.001	0.002	0.014	0.000	0.021	303.953	0.772	0.5424023E-04	3.171791	0.5007431E-02	-0.1983104
08072011	12	0.000	0.013	0.019	0.000	0.001	0.000	0.001	0.001	0.012	0.000	0.020	304.653	0.736	0.2491474E-04	2.988262	0.6371361E-02	-0.3288136
08072011	13	0.000	0.007	0.017	0.000	0.000	0.000	0.001	0.001	0.013	0.000	0.021	304.552	0.715	0.1794100E-04	2.970452	0.7210333E-02	-0.3851328
08072011	14	0.000	0.006	0.015	0.000	0.000	0.000	0.001	0.001	0.015	0.000	0.021	305.829	0.694	0.1186132E-04	2.510285	0.5151648E-02	-0.3122231
08072011	15	0.000	0.005	0.018	0.000	0.000	0.000	0.001	0.001	0.015	0.000	0.021	305.934	0.681	0.1001358E-04	2.424745	0.5077219E-02	-0.3209598
08072011	16	0.000	0.004	0.017	0.000	0.000	0.000	0.001	0.001	0.016	0.000	0.021	305.838	0.670	0.9655952E-05	2.258851	0.4117525E-02	-0.2607486
08072011	17	0.001	0.003	0.012	0.000	0.000	0.000	0.001	0.001	0.016	0.000	0.019	305.286	0.666	0.1913309E-04	1.805966	0.1932082E-02	-0.2931581E-01
08072011	18	0.001	0.002	0.007	0.000	0.000	0.000	0.001	0.001	0.016	0.000	0.016	304.521	0.680	0.6192923E-04	1.493279	0.1752704E-02	-0.6956768E-01
08072011	19	0.003	0.002	0.003	0.001	0.000	0.000	0.001	0.002	0.017	0.000	0.014	303.792	0.699	0.000000	1.296902	0.3202895E-02	-0.3926355
08072011	20	0.004	0.001	0.002	0.001	0.000	0.000	0.001	0.002	0.016	0.000	0.012	302.802	0.694	0.6210804E-04	1.339532	0.3266874E-02	-0.3871794
08072011	21	0.004	0.002	0.002	0.001	0.001	0.000	0.001	0.002	0.016	0.000	0.011	301.632	0.740	0.1906419E-01	1.213188	0.1610376E-04	1.877001
08072011	22	0.006	0.002	0.002	0.001	0.001	0.000	0.001	0.002	0.016	0.000	0.011	301.271	0.729	0.1894015E-01	1.169252	0.1655393E-04	1.849007
08072011	23	0.007	0.002	0.002	0.001	0.001	0.000	0.001	0.001	0.015	0.000	0.010	300.349	0.794	0.2364194E-01	1.480548	0.1937012E-04	1.883290
08072011	24	0.006	0.002	0.002	0.001	0.002	0.000	0.001	0.001	0.014	0.000	0.010	299.742	0.837	0.2907503E-01	1.914536	0.2227444E-04	1.934257
08082011	01	0.005	0.003	0.001	0.001	0.002	0.000	0.001	0.001	0.014	0.000	0.009	299.202	0.858	0.3789473E-01	1.921538	0.1622087E-04	2.073575
08082011	02	0.004	0.003	0.001	0.001	0.003	0.000	0.001	0.001	0.014	0.000	0.010	298.545	0.893	0.5213910E-01	2.708613	0.2202368E-04	2.089857
08082011	03	0.003	0.005	0.001	0.001	0.003	0.000	0.001	0.001	0.014	0.000	0.010	298.143	0.914	0.5914295E-01	3.276389	0.2367230E-04	2.141155
08082011	04	0.003	0.007	0.002	0.001	0.004	0.000	0.001	0.001	0.015	0.000	0.011	297.899	0.931	0.6101835E-01	4.668865	0.3926752E-04	2.075178
08082011	05	0.004	0.007	0.002	0.001	0.004	0.000	0.001	0.001	0.015	0.000	0.011	297.868	0.923	0.5561215E-01	4.085652	0.3708571E-04	2.042055
08082011	06	0.005	0.008	0.002	0.001	0.005	0.000	0.001	0.001	0.015	0.000	0.012	297.721	0.930	0.6734419E-01	5.137252	0.4385233E-04	2.068738
08082011	07	0.007	0.009	0.002	0.001	0.005	0.000	0.001	0.002	0.015	0.000	0.013	298.013	0.937	0.7378834E-01	6.005085	0.4605675E-04	2.115226
08082011	08	0.004	0.021	0.006	0.001	0.005	0.000	0.001	0.003	0.018	0.001	0.015	299.844	0.873	0.2495420E-01	3.112244	0.5735507E-04	1.734502
08082011	09	0.002	0.061	0.020	0.001	0.004	0.000	0.001	0.003	0.016	0.001	0.017	301.401	0.819	0.000000	2.564411	0.3077844E-02	-0.7925900E-01
08082011	10	0.001	0.073	0.031	0.000	0.002	0.000	0.001	0.002	0.012	0.000	0.014	302.903	0.762	0.1860261E-03	1.686988	0.2230214E-02	-0.1212346
08082011	11	0.001	0.053	0.029	0.000	0.001	0.000	0.001	0.002	0.011	0.000	0.014	304.312	0.709	0.6043911E-04	1.385963	0.1639322E-02	-0.7291256E-01
08082011	12	0.001	0.034	0.026	0.000	0.001	0.000	0.001	0.002	0.012	0.000	0.014	305.500	0.668	0.5191565E-04	1.166955	0.1609887E-02	-0.1397415
08082011	13	0.001	0.023	0.024	0.000	0.001	0.000	0.001	0.002	0.013	0.000	0.015	306.651	0.631	0.3403425E-04	1.090269	0.1469593E-02	-0.1296635
08082011	14	0.001	0.018	0.023	0.000	0.000	0.000	0.001	0.001	0.014	0.000	0.015	306.990	0.617	0.2235174E-04	1.118727	0.1258362E-02	-0.5108137E-01
08082011	15	0.001	0.012	0.020	0.000	0.000	0.000	0.001	0.001	0.016	0.000	0.015	306.450	0.619	0.4011393E-04	1.088449	0.1636507E-02	-0.1771099
08082011	16	0.001	0.007	0.017	0.000	0.000	0.000	0.001	0.001	0.015	0.000	0.014	305.416	0.637	0.5006790E-04	1.084532	0.1690113E-02	-0.1926735
08082011	17	0.001	0.005	0.013	0.000	0.000	0.000	0.000	0.001	0.014	0.000	0.013	304.205	0.664	0.4488230E-04	1.098464	0.1622783E-02	-0.1694747
08082011	18	0.001	0.003	0.010	0.000	0.000	0.000	0.000	0.001	0.012	0.000	0.013	303.455	0.681	0.2801418E-04	1.223521	0.1427949E-02	-0.6710140E-01
08082011	19	0.001	0.003	0.009	0.000	0.000	0.000	0.001	0.001	0.013	0.000	0.013	302.562	0.704	0.7957220E-04	1.281179	0.1665698E-02	-0.1139864
08082011	20	0.001	0.002	0.008	0.000	0.000	0.000	0.001	0.002	0.014	0.000	0.013	301.092	0.738	0.2088547E-03	1.334808	0.2259690E-02	-0.2286302
08082011	21	0.001	0.002	0.007	0.000	0.000	0.000	0.001	0.002	0.014	0.000	0.013	300.043	0.781	0.3471971E-03	1.597075	0.2346418E-02	-0.1670801
08082011	22	0.002	0.002	0.005	0.000	0.000	0.000	0.001	0.002	0.014	0.000	0.012	299.375	0.812	0.1238048E-02	1.711955	0.2487332E-02	-0.1622415
08082011	23	0.002	0.002	0.003	0.001	0.001	0.000	0.001	0.002	0.012	0.000	0.011	298.949	0.829	0.000000	1.745472	0.2196713E-02	-0.9986041E-01
08082011	24	0.002	0.001	0.002	0.001	0.001	0.000	0.001	0.002	0.010	0.000	0.009	298.661	0.845	0.1072884E-05	1.567372	0.1865799E-02	-0.7569262E-01
08092011	01	0.002	0.001	0.001	0.001	0.001	0.000	0.001	0.001	0.009	0.000	0.007	298.383	0.865	0.000000	2.045179	0.2039990E-02	0.1103314E-02
08092011	02	0.002	0.001	0.001	0.001	0.001	0.000	0.001	0.001	0.008	0.000	0.006	298.233	0.875	0.2744436E-01	1.375684	0.1131438E-04	2.084888
08092011	03	0.002	0.002	0.001	0.001	0.001	0.000	0.001	0.001	0.009	0.000	0.006	298.127	0.884	0.2743894E-01	1.375684	0.1131364E-04	2.084916
08092011	04	0.002	0.004	0.001	0.001	0.002	0.000	0.001	0.001	0.011	0.000	0.008	297.988	0.895	0.4346645E-01	2.297481	0.1765657E-04	2.114346
08092011	05	0.002	0.010	0.004	0.001	0.003	0.000	0.001	0.001	0.014	0.000	0.011	297.865	0.905	0.000000	3.640026	0.2189010E-02	0.2208567
08092011	06	0.002	0.017	0.007	0.001	0.004	0.000	0.001	0.001	0.016	0.000	0.014	297.741	0.916	0.000000	5.204913	0.2639575E-02	0.2948795
08092011	07	0.002	0.022	0.013	0.001	0.004	0.000	0.001	0.002	0.019	0.000	0.016	298.075	0.911	0.000000	5.033663	0.2776380E-02	0.2584052
08092011	08	0.003	0.031	0.024	0.001	0.004	0.000	0.002	0.002	0.020	0.001	0.017	299.717	0.866	0.000000	3.830556	0.2986158E-02	0.1081490
08092011	09	0.004	0.063	0.045	0.001	0.003	0.000	0.002	0.002	0.022	0.002	0.016	301.327	0.812	0.8120179E-02	2.541699	0.1284014E-03	1.296554
08092011	10	0.003	0.067	0.036	0.001	0.002	0.000	0.001	0.002	0.018	0.001	0.012	302.599	0.766	0.5390227E-02	1.528040	0.7040744E-04	1.336516
08092011	11	0.002	0.042	0.022	0.000	0.001	0.000	0.001	0.001	0.011	0.001	0.008	303.925	0.720	0.5014002E-02	1.128178	0.2918171E-02	-0.4127333
08092011	12	0.001	0.017	0.015	0.000	0.001	0.000	0.001	0.001	0.010	0.001	0.009	303.387	0.728	0.2301335E-03	0.9549335	0.2171268E-02	-0.3567403
08092011	13	0.001	0.005	0.009	0.001	0.000	0.000	0.000	0.001	0.008	0.000	0.009	303.569	0.721	0.000000	0.9489058	0.1336511E-02	-0.1487495
08092011	14	0.001	0.003	0.008	0.001	0.000	0.000	0.000	0.001	0.009	0.000	0.010	303.536	0.724	0.000000	1.070265	0.1436099E-02	-0.1276931
08092011	15	0.001	0.002	0.008	0.001	0.000	0.000	0.000	0.001	0.011	0.000	0.012	303.233	0.728	0.000000	1.368215	0.1711842E-02	-0.9730938E-01
08092011	16	0.001	0.002	0.008	0.001	0.000	0.000	0.000	0.001	0.012	0.000	0.013	303.016	0.724	0.000000	1.434343	0.1733385E-02	-0.8224212E-01
08092011	17	0.001	0.002	0.008	0.001	0.000	0.000	0.001	0.001	0.016	0.000	0.015	302.619	0.720	0.000000	1.611016	0.2103245E-02	-0.1157901
08092011	18	0.001	0.002	0.008	0.001	0.000	0.000	0.001	0.001	0.018	0.000	0.017	301.668	0.736	0.000000	2.017906	0.2364383E-02	-0.6881692E-01
08092011	19	0.001	0.001	0.006	0.001	0.000	0.000	0.001	0.001	0.019	0.000	0.017	300.555	0.813	0.000000	2.770262	0.3002610E-02	-0.3497803E-01
08092011	20	0.002	0.001	0.004	0.001	0.000	0.000	0.001	0.001	0.021	0.000	0.018	299.555	0.857	0.000000	3.891432	0.3502619E-02	0.4571652E-01
08092011	21	0.002	0.001	0.003	0.001	0.000	0.000	0.001	0.001	0.021	0.000	0.018	298.949	0.873	0.000000	4.187579	0.3505820E-02	0.7717348E-01
08092011	22	0.002	0.001	0.002	0.001	0.000	0.000	0.001	0.001	0.021	0.000	0.017	298.611	0.871	0.000000	3.887676	0.3337282E-02	0.6629715E-01
08092011	23	0.002	0.001	0.002	0.001	0.001	0.000	0.001	0.001	0.019	0.000	0.015	298.206	0.902	0.000000	4.432160	0.3022765E-02	0.1662111
08092011	24	0.002	0.001	0.001	0.001	0.001	0.000	0.001	0.001	0.019	0.000	0.013	297.980	0.913	0.000000	4.324972	0.2638949E-02	0.2145523
08102011	01	0.003	0.000	0.001	0.000	0.001	0.000	0.001	0.001	0.017	0.000	0.011	297.630	0.943	-99999.00	5.458636	0.2655789E-03	1.312891
08102011	02	0.002	0.000	0.001	0.000	0.001	0.000	0.001	0.000	0.016	0.000	0.010	297.377	0.958	-99999.00	8.399859	0.2518888E-03	1.523063
08102011	03	0.002	0.001	0.001	0.000	0.001	0.000	0.001	0.000	0.015	0.000	0.009	297.170	0.972	-99999.00	10.35151	0.2569743E-03	1.605114
08102011	04	0.003	0.001	0.001	0.000	0.001	0.000	0.001	0.000	0.013	0.000	0.008	297.055	0.980	-99999.00	14.30312	0.2728556E-03	1.719498
08102011	05	0.004	0.001	0.001	0.000	0.002	0.000	0.001	0.000	0.012	0.000	0.008	296.967	0.986	-99999.00	30.78572	0.3157518E-03	1.989003
08102011	06	0.004	0.001	0.001	0.000	0.002	0.000	0.001	0.000	0.012	0.000	0.008	296.875	0.990	-99999.00	30.78572	0.3164153E-03	1.988092
08102011	07	0.006	0.001	0.001	0.000	0.002	0.000	0.001	0.000	0.011	0.000	0.008	297.211	0.990	-99999.00	30.78572	0.3133392E-03	1.992335
08102011	08	0.007	0.003	0.003	0.000	0.002	0.000	0.001	0.001	0.010	0.000	0.008	298.613	0.961	-99999.00	7.238142	0.2934091E-03	1.392154
08102011	09	0.004	0.018	0.007	0.000	0.004	0.000	0.001	0.001	0.010	0.000	0.008	300.461	0.891	-99999.00	2.944888	0.1329498E-02	0.3453809
08102011	10	0.001	0.069	0.015	0.000	0.004	0.000	0.001	0.001	0.010	0.000	0.011	302.179	0.817	0.6978512E-03	1.848842	0.2377462E-02	-0.1092140
08102011	11	0.000	0.072	0.017	0.000	0.002	0.000	0.001	0.001	0.012	0.000	0.018	303.292	0.767	0.5763769E-04	2.798977	0.4050849E-02	-0.1605468
08102011	12	0.000	0.036	0.015	0.000	0.001	0.000	0.000	0.001	0.011	0.000	0.023	304.192	0.727	0.2008677E-04	3.684654	0.1133286E-01	-0.4879428
08102011	13	0.000	0.020	0.014	0.000	0.001	0.000	0.000	0.001	0.010	0.000	0.023	305.620	0.674	0.7152557E-05	3.134538	0.1199792E-01	-0.5829324
08102011	14	0.000	0.020	0.014	0.000	0.001	0.000	0.000	0.001	0.010	0.000	0.022	306.207	0.653	0.4947186E-05	2.789053	0.1087025E-01	-0.5907829
08102011	15	0.000	0.021	0.013	0.000	0.001	0.000	0.000	0.001	0.010	0.000	0.021	305.595	0.664	0.5722046E-05	2.689657	0.9884153E-02	-0.5652426
08102011	16	0.000	0.019	0.010	0.000	0.001	0.000	0.000	0.001	0.010	0.000	0.021	304.515	0.696	0.1132488E-04	3.032439	0.1007757E-01	-0.5215636
08102011	17	0.000	0.015	0.008	0.000	0.001	0.000	0.000	0.001	0.011	0.000	0.020	302.946	0.742	0.2449751E-04	3.149337	0.8337807E-02	-0.4228327
08102011	18	0.000	0.014	0.006	0.000	0.001	0.000	0.000	0.001	0.011	0.000	0.019	301.745	0.791	0.5984306E-04	3.559153	0.7708441E-02	-0.3356200
08102011	19	0.000	0.013	0.006	0.000	0.001	0.000	0.000	0.001	0.012	0.000	0.019	300.381	0.846	0.2057552E-03	4.656726	0.7467585E-02	-0.2050994
08102011	20	0.000	0.013	0.005	0.000	0.001	0.000	0.000	0.001	0.012	0.000	0.019	299.421	0.884	0.3983378E-03	5.654482	0.7842789E-02	-0.1420778
08102011	21	0.000	0.008	0.004	0.000	0.001	0.000	0.001	0.001	0.013	0.000	0.018	298.828	0.903	0.8878112E-03	5.978653	0.5875326E-02	0.7571383E-02
08102011	22	0.001	0.005	0.003	0.000	0.001	0.000	0.001	0.001	0.013	0.000	0.018	298.380	0.912	0.1271307E-02	6.476202	0.5512842E-02	0.6994486E-01
08102011	23	0.001	0.003	0.002	0.000	0.001	0.000	0.001	0.001	0.014	0.000	0.016	297.902	0.922	0.2297044E-02	6.141949	0.4027909E-02	0.1832266
08102011	24	0.001	0.002	0.002	0.000	0.001	0.000	0.001	0.001	0.014	0.000	0.015	297.452	0.931	0.3549576E-02	6.490964	0.3651151E-02	0.2498794
08112011	01	0.001	0.002	0.002	0.000	0.001	0.000	0.001	0.001	0.015	0.000	0.014	297.046	0.940	0.6965816E-02	6.936923	0.3160259E-02	0.3414443
08112011	02	0.002	0.003	0.002	0.000	0.001	0.000	0.001	0.001	0.017	0.000	0.014	296.767	0.945	0.1891601E-01	8.309361	0.2920985E-02	0.4540383
08112011	03	0.002	0.004	0.002	0.000	0.001	0.000	0.001	0.001	0.019	0.000	0.013	296.661	0.945	0.6705946E-01	7.881833	0.2593492E-02	0.4827423
08112011	04	0.002	0.004	0.002	0.000	0.001	0.000	0.001	0.001	0.020	0.000	0.012	296.625	0.945	-99999.00	7.278261	0.5740338E-03	1.103090
08112011	05	0.004	0.004	0.002	0.000	0.001	0.000	0.001	0.001	0.020	0.000	0.012	296.591	0.947	-99999.00	7.476371	0.4575266E-03	1.213274
08112011	06	0.005	0.004	0.002	0.000	0.001	0.000	0.001	0.001	0.019	0.000	0.012	296.587	0.946	-99999.00	7.476642	0.4574266E-03	1.213385
08112011	07	0.003	0.003	0.001	0.001	0.001	0.000	0.001	0.001	0.018	0.000	0.011	296.754	0.948	0.1055640	6.616010	0.4018518E-04	2.216530
08112011	08	0.002	0.005	0.002	0.001	0.002	0.000	0.001	0.001	0.016	0.000	0.012	297.918	0.930	0.000000	5.092239	0.2451355E-02	0.3175026
08112011	09	0.001	0.011	0.005	0.000	0.002	0.000	0.001	0.001	0.015	0.000	0.017	299.100	0.896	0.1613319E-02	5.277856	0.3824062E-02	0.1399326
08112011	10	0.001	0.009	0.007	0.000	0.002	0.000	0.001	0.001	0.016	0.000	0.020	300.206	0.848	0.4804730E-03	4.370352	0.4248008E-02	0.1233115E-01
08112011	11	0.001	0.011	0.012	0.000	0.001	0.000	0.001	0.001	0.019	0.000	0.019	301.322	0.790	0.3094673E-03	2.893598	0.3029109E-02	-0.1987658E-01
08112011	12	0.002	0.010	0.012	0.000	0.001	0.000	0.000	0.001	0.021	0.000	0.016	302.353	0.734	0.3809929E-03	1.787871	0.3483336E-02	-0.2896592
08112011	13	0.003	0.008	0.011	0.000	0.001	0.000	0.000	0.001	0.020	0.000	0.013	303.014	0.693	0.9645045E-02	1.372152	0.3363891E-02	-0.3894395
08112011	14	0.002	0.006	0.009	0.000	0.001	0.000	0.000	0.001	0.020	0.000	0.011	303.209	0.677	-99999.00	1.228029	0.4691885E-02	-0.5821389
08112011	15	0.003	0.006	0.008	0.000	0.001	0.000	0.000	0.001	0.019	0.000	0.010	303.173	0.670	-99999.00	1.157852	0.2552699E-02	-0.3433467
08112011	16	0.004	0.007	0.007	0.000	0.001	0.000	0.000	0.001	0.017	0.000	0.010	303.106	0.664	-99999.00	1.073219	0.2634552E-02	-0.3900183
08112011	17	0.006	0.007	0.006	0.000	0.001	0.000	0.000	0.001	0.016	0.000	0.009	302.811	0.662	-99999.00	1.035797	0.9073834E-03	0.5748399E-01
08112011	18	0.008	0.007	0.005	0.000	0.001	0.000	0.001	0.001	0.015	0.000	0.009	302.400	0.663	-99999.00	1.008891	0.4344918E-03	0.3658629
08112011	19	0.008	0.006	0.003	0.001	0.001	0.000	0.001	0.001	0.014	0.000	0.008	301.766	0.686	0.1068980E-01	0.7929477	0.1384248E-04	1.758031
08112011	20	0.010	0.006	0.003	0.001	0.001	0.000	0.001	0.001	0.013	0.000	0.008	300.816	0.684	0.1102108E-01	0.7672336	0.1518655E-04	1.703468
08112011	21	0.012	0.006	0.003	0.001	0.001	0.000	0.001	0.001	0.013	0.000	0.008	299.975	0.695	0.1216942E-01	0.8202353	0.1689920E-04	1.686072
08112011	22	0.014	0.006	0.003	0.001	0.001	0.000	0.001	0.001	0.013	0.000	0.008	299.264	0.719	0.1333833E-01	0.8784899	0.1851114E-04	1.676304
08112011	23	0.017	0.007	0.004	0.001	0.001	0.000	0.001	0.001	0.012	0.000	0.008	298.610	0.753	0.1350689E-01	0.9802994	0.2448649E-04	1.602432
08112011	24	0.020	0.009	0.004	0.000	0.001	0.000	0.001	0.001	0.012	0.000	0.008	297.992	0.794	-99999.00	1.505971	0.7928487E-04	1.278626
08122011	01	0.022	0.010	0.004	0.000	0.001	0.000	0.001	0.001	0.011	0.000	0.008	297.389	0.838	-99999.00	1.987149	0.6947444E-04	1.456405
08122011	02	0.022	0.010	0.004	0.000	0.001	0.000	0.001	0.001	0.011	0.000	0.008	296.951	0.869	-99999.00	2.454648	0.6691900E-04	1.564440
08122011	03	0.022	0.009	0.005	0.000	0.001	0.000	0.002	0.001	0.011	0.000	0.008	296.690	0.885	-99999.00	3.121532	0.5962683E-04	1.718926
08122011	04	0.021	0.009	0.005	0.000	0.001	0.000	0.002	0.001	0.010	0.000	0.007	296.502	0.897	-99999.00	3.131439	0.5006912E-04	1.796174
08122011	05	0.021	0.008	0.006	0.000	0.001	0.000	0.002	0.001	0.010	0.000	0.007	296.339	0.908	-99999.00	3.777474	0.5588463E-04	1.829909
08122011	06	0.020	0.008	0.005	0.000	0.001	0.000	0.002	0.001	0.010	0.000	0.007	296.187	0.922	-99999.00	3.974004	0.5323387E-04	1.873040
08122011	07	0.018	0.008	0.004	0.000	0.001	0.000	0.002	0.002	0.008	0.000	0.007	296.435	0.932	-99999.00	3.759201	0.4613077E-04	1.911105
08122011	08	0.013	0.010	0.005	0.000	0.001	0.001	0.002	0.003	0.007	0.000	0.008	298.082	0.888	-99999.00	2.519754	0.5954729E-04	1.626496
08122011	09	0.010	0.027	0.015	0.000	0.001	0.000	0.002	0.003	0.009	0.001	0.009	299.937	0.824	-99999.00	2.230046	0.3958460E-02	-0.2492124
08122011	10	0.007	0.043	0.017	0.000	0.001	0.000	0.001	0.002	0.013	0.000	0.010	301.568	0.763	-99999.00	1.613574	0.8700604E-02	-0.7317606
08122011	11	0.004	0.057	0.015	0.000	0.001	0.000	0.001	0.001	0.015	0.000	0.010	303.268	0.689	-99999.00	1.169745	0.1011934E-01	-0.9370610
08122011	12	0.002	0.076	0.015	0.000	0.001	0.000	0.001	0.001	0.014	0.000	0.011	304.431	0.645	0.3636479E-03	0.9323084	0.2908278E-02	-0.4940763
08122011	13	0.001	0.076	0.015	0.000	0.001	0.000	0.001	0.001	0.014	0.000	0.012	305.392	0.610	0.6008148E-04	0.8097996	0.2343354E-02	-0.4614603
08122011	14	0.001	0.060	0.016	0.000	0.001	0.000	0.001	0.001	0.016	0.000	0.017	305.789	0.599	0.2694130E-04	1.206949	0.1335911E-02	-0.4408892E-01
08122011	15	0.001	0.039	0.017	0.000	0.001	0.000	0.001	0.002	0.019	0.000	0.022	305.672	0.603	0.2056360E-04	1.528308	0.1329240E-02	0.6060740E-01
08122011	16	0.000	0.026	0.017	0.000	0.001	0.000	0.001	0.002	0.022	0.000	0.027	305.495	0.609	0.7688999E-05	2.091354	0.2340728E-02	-0.4892343E-01
08122011	17	0.000	0.018	0.016	0.000	0.001	0.000	0.001	0.002	0.024	0.000	0.030	305.018	0.621	0.8642673E-05	2.498661	0.3319905E-02	-0.1234183
08122011	18	0.001	0.014	0.013	0.000	0.001	0.000	0.001	0.003	0.025	0.000	0.030	304.382	0.634	0.2425909E-04	2.322481	0.1946217E-02	0.7676096E-01
08122011	19	0.001	0.011	0.011	0.000	0.001	0.001	0.001	0.003	0.027	0.000	0.031	303.482	0.661	0.8910894E-04	2.731582	0.2271873E-02	0.8003011E-01
08122011	20	0.001	0.008	0.008	0.000	0.001	0.001	0.002	0.004	0.030	0.000	0.031	302.320	0.672	0.2009273E-03	2.638215	0.2910129E-02	-0.4260210E-01
08122011	21	0.002	0.008	0.007	0.000	0.001	0.001	0.002	0.005	0.033	0.000	0.031	301.372	0.689	0.4237294E-03	2.638611	0.4128664E-02	-0.1944342
08122011	22	0.003	0.009	0.008	0.000	0.001	0.001	0.003	0.006	0.035	0.000	0.031	300.565	0.714	0.1622438E-02	2.881304	0.4370304E-02	-0.1809225
08122011	23	0.003	0.009	0.009	0.000	0.001	0.001	0.003	0.007	0.035	0.000	0.031	299.770	0.751	0.3809631E-02	3.269710	0.4113891E-02	-0.9974360E-01
08122011	24	0.003	0.009	0.009	0.000	0.001	0.001	0.003	0.007	0.035	0.000	0.030	298.997	0.797	0.1238465E-01	3.923382	0.3701519E-02	0.2528068E-01
08132011	01	0.004	0.010	0.008	0.000	0.001	0.001	0.003	0.008	0.035	0.000	0.030	298.272	0.846	0.4750031E-01	5.376407	0.3837320E-02	0.1464641
08132011	02	0.004	0.011	0.006	0.000	0.001	0.001	0.004	0.008	0.036	0.000	0.029	297.744	0.877	0.8271271E-01	8.515657	0.4391655E-02	0.2875900
08132011	03	0.004	0.011	0.005	0.000	0.001	0.001	0.004	0.008	0.037	0.000	0.029	297.432	0.890	0.1031011	9.846082	0.4496060E-02	0.3404313
08132011	04	0.005	0.012	0.005	0.000	0.001	0.001	0.004	0.008	0.038	0.000	0.029	297.221	0.896	0.1237707	12.08742	0.4802437E-02	0.4008720
08132011	05	0.005	0.012	0.005	0.000	0.001	0.001	0.004	0.008	0.038	0.001	0.028	297.051	0.900	-99999.00	7.552025	0.5089197E-03	1.171414
08132011	06	0.010	0.013	0.005	0.000	0.001	0.001	0.004	0.008	0.035	0.001	0.028	296.918	0.905	-99999.00	8.495300	0.3886717E-03	1.339596
08132011	07	0.012	0.013	0.005	0.000	0.001	0.001	0.004	0.008	0.034	0.001	0.028	297.176	0.912	-99999.00	8.524901	0.3496542E-03	1.387051
08132011	08	0.010	0.013	0.005	0.000	0.001	0.001	0.005	0.008	0.034	0.001	0.028	299.169	0.855	-99999.00	5.460547	0.4567505E-03	1.077557
08132011	09	0.002	0.016	0.027	0.000	0.001	0.001	0.002	0.005	0.031	0.000	0.030	300.779	0.787	0.1132727E-02	3.872751	0.4191345E-02	-0.3433386E-01
08132011	10	0.001	0.018	0.042	0.000	0.001	0.000	0.001	0.003	0.024	0.000	0.031	301.927	0.735	0.8559227E-04	3.818345	0.4501937E-02	-0.7152422E-01
08132011	11	0.000	0.010	0.028	0.000	0.001	0.000	0.001	0.002	0.018	0.000	0.029	302.982	0.681	0.1549721E-04	3.418575	0.8351099E-02	-0.3878985
08132011	12	0.000	0.005	0.019	0.000	0.000	0.000	0.001	0.001	0.014	0.000	0.027	303.837	0.637	0.6496906E-05	3.239140	0.1197966E-01	-0.5680149
08132011	13	0.000	0.003	0.013	0.000	0.000	0.000	0.001	0.001	0.013	0.000	0.025	304.796	0.595	0.2980232E-05	2.661809	0.1072006E-01	-0.6050202
08132011	14	0.000	0.002	0.010	0.000	0.000	0.000	0.001	0.001	0.013	0.000	0.024	305.368	0.570	0.1728535E-05	2.306876	0.9569614E-02	-0.6178702
08132011	15	0.000	0.003	0.012	0.000	0.000	0.000	0.001	0.001	0.012	0.000	0.026	305.775	0.561	0.1549721E-05	2.614489	0.1263256E-01	-0.6841046
08132011	16	0.000	0.005	0.013	0.000	0.000	0.000	0.000	0.001	0.012	0.000	0.027	305.010	0.585	0.2920628E-05	3.052064	0.1487286E-01	-0.6878008
08132011	17	0.000	0.003	0.010	0.000	0.000	0.000	0.001	0.001	0.013	0.000	0.023	304.221	0.602	0.2920628E-05	2.346352	0.8652695E-02	-0.5667582
08132011	18	0.000	0.002	0.008	0.000	0.000	0.000	0.001	0.001	0.014	0.000	0.019	303.735	0.602	0.2980232E-05	1.634513	0.3577711E-02	-0.3402168
08132011	19	0.000	0.002	0.007	0.000	0.000	0.000	0.001	0.001	0.015	0.000	0.017	302.845	0.610	0.8285046E-05	1.283633	0.1212797E-02	0.2465290E-01
08132011	20	0.001	0.004	0.007	0.000	0.000	0.000	0.001	0.001	0.021	0.000	0.018	301.176	0.667	0.1115203E-03	1.580789	0.2372845E-02	-0.1763955
08132011	21	0.003	0.006	0.006	0.000	0.001	0.000	0.002	0.001	0.028	0.000	0.019	300.136	0.711	0.3080964E-02	2.103984	0.3605491E-02	-0.2339221
08132011	22	0.006	0.007	0.006	0.000	0.001	0.000	0.002	0.002	0.033	0.000	0.020	299.432	0.744	-99999.00	2.609535	0.1519492E-02	0.2348646
08132011	23	0.010	0.008	0.006	0.000	0.001	0.000	0.002	0.002	0.033	0.000	0.020	298.896	0.776	-99999.00	3.201916	0.7022815E-03	0.6588986
08132011	24	0.011	0.007	0.005	0.001	0.001	0.000	0.002	0.002	0.032	0.000	0.019	298.342	0.822	0.3657615E-01	3.206451	0.7075053E-04	1.656295
08142011	01	0.009	0.006	0.004	0.001	0.001	0.000	0.002	0.002	0.030	0.000	0.018	297.763	0.878	0.5053848E-01	4.394508	0.6765826E-04	1.812589
08142011	02	0.006	0.003	0.003	0.001	0.001	0.000	0.002	0.001	0.027	0.000	0.016	297.388	0.912	0.6636018E-01	5.438124	0.6262011E-04	1.938735
08142011	03	0.004	0.001	0.002	0.001	0.001	0.000	0.001	0.001	0.023	0.000	0.013	297.182	0.927	0.7615703E-01	5.600154	0.4883928E-04	2.059431
08142011	04	0.004	0.001	0.002	0.001	0.001	0.000	0.001	0.001	0.019	0.000	0.011	297.049	0.936	0.7162470E-01	5.458636	0.4464987E-04	2.087264
08142011	05	0.002	0.000	0.001	0.000	0.001	0.000	0.001	0.001	0.016	0.000	0.009	296.946	0.945	-99999.00	5.291506	0.2677617E-03	1.295831
08142011	06	0.002	0.000	0.001	0.000	0.001	0.000	0.001	0.001	0.013	0.000	0.008	296.822	0.952	-99999.00	4.629255	0.2729248E-03	1.229468
08142011	07	0.002	0.000	0.001	0.000	0.001	0.000	0.001	0.001	0.012	0.000	0.007	297.099	0.940	-99999.00	3.354371	0.2258751E-03	1.171743
08142011	08	0.002	0.001	0.002	0.001	0.000	0.000	0.001	0.001	0.010	0.000	0.007	298.587	0.892	0.000000	2.383631	0.2129304E-02	0.4900136E-01
08142011	09	0.002	0.002	0.003	0.001	0.000	0.000	0.001	0.001	0.009	0.000	0.007	300.119	0.828	0.1335144E-04	1.184113	0.1960323E-02	-0.2189344
08142011	10	0.002	0.002	0.004	0.001	0.000	0.000	0.001	0.001	0.009	0.000	0.008	301.849	0.733	0.000000	0.8366008	0.2077295E-02	-0.3949799
08142011	11	0.001	0.002	0.005	0.000	0.000	0.000	0.001	0.001	0.010	0.000	0.009	303.283	0.668	0.7766485E-04	0.7204620	0.1773987E-02	-0.3913395
08142011	12	0.001	0.002	0.008	0.000	0.000	0.000	0.001	0.001	0.009	0.000	0.010	304.480	0.615	0.2354383E-04	0.7055041	0.9889605E-03	-0.1466795
08142011	13	0.000	0.001	0.010	0.000	0.000	0.000	0.001	0.001	0.010	0.000	0.012	305.876	0.558	0.2264977E-05	0.7375893	0.7124457E-03	0.1506285E-01
08142011	14	0.000	0.001	0.011	0.000	0.000	0.000	0.001	0.001	0.010	0.000	0.013	307.050	0.503	0.3576279E-06	0.7209113	0.1245131E-02	-0.2373330
08142011	15	0.000	0.001	0.011	0.000	0.000	0.000	0.001	0.001	0.010	0.000	0.013	306.971	0.498	0.3576279E-06	0.7209113	0.1244104E-02	-0.2369747
08142011	16	0.000	0.001	0.011	0.000	0.000	0.000	0.001	0.001	0.012	0.000	0.013	306.391	0.512	0.4231930E-05	0.6407901	0.5417617E-03	0.7290749E-01
08142011	17	0.001	0.001	0.009	0.000	0.000	0.000	0.001	0.001	0.014	0.000	0.013	305.386	0.535	0.1901388E-04	0.6832799	0.1225663E-02	-0.2537726
08142011	18	0.002	0.002	0.006	0.001	0.000	0.000	0.001	0.002	0.017	0.000	0.013	304.165	0.575	0.000000	0.7784705	0.3147541E-02	-0.6067291
08142011	19	0.003	0.002	0.004	0.001	0.000	0.000	0.001	0.002	0.017	0.000	0.013	302.657	0.629	0.000000	0.9793442	0.3044815E-02	-0.4926255
08142011	20	0.002	0.002	0.003	0.001	0.001	0.000	0.001	0.002	0.015	0.000	0.013	299.634	0.758	0.000000	1.516599	0.2648542E-02	-0.2421361
08142011	21	0.002	0.002	0.002	0.002	0.001	0.000	0.001	0.002	0.014	0.000	0.012	298.203	0.808	0.000000	1.752333	0.2363228E-02	-0.1298890
08142011	22	0.002	0.003	0.002	0.002	0.001	0.001	0.002	0.002	0.014	0.000	0.012	297.371	0.829	0.000000	2.419166	0.2284821E-02	0.2481351E-01
08142011	23	0.002	0.004	0.002	0.002	0.001	0.001	0.002	0.002	0.013	0.000	0.012	296.714	0.841	0.000000	2.133553	0.1949013E-02	0.3928872E-01
08142011	24	0.002	0.005	0.002	0.002	0.001	0.001	0.002	0.002	0.014	0.000	0.012	296.150	0.854	0.000000	2.703297	0.2148729E-02	0.9971216E-01
08152011	01	0.001	0.010	0.003	0.002	0.001	0.000	0.002	0.002	0.016	0.000	0.014	295.637	0.860	0.000000	2.745211	0.2417849E-02	0.5514658E-01
08152011	02	0.001	0.014	0.003	0.002	0.001	0.000	0.002	0.002	0.021	0.000	0.019	295.213	0.861	0.000000	3.885925	0.3291288E-02	0.7212857E-01
08152011	03	0.001	0.017	0.004	0.002	0.002	0.000	0.002	0.002	0.029	0.000	0.025	294.843	0.858	0.000000	5.265535	0.4268361E-02	0.9118131E-01
08152011	04	0.001	0.018	0.004	0.002	0.002	0.000	0.002	0.002	0.035	0.000	0.029	294.473	0.860	0.000000	6.166435	0.4925218E-02	0.9760872E-01
08152011	05	0.002	0.018	0.005	0.002	0.002	0.000	0.002	0.002	0.040	0.000	0.031	294.069	0.867	0.000000	7.102303	0.4912035E-02	0.1601378
08152011	06	0.002	0.018	0.006	0.002	0.002	0.000	0.003	0.002	0.043	0.000	0.033	293.682	0.879	0.000000	8.196165	0.4952500E-02	0.2187862
08152011	07	0.002	0.018	0.007	0.002	0.002	0.000	0.003	0.002	0.046	0.001	0.034	293.586	0.867	0.000000	7.883770	0.4952577E-02	0.2019027
08152011	08	0.002	0.034	0.021	0.001	0.002	0.001	0.003	0.003	0.049	0.001	0.037	294.771	0.826	0.000000	6.552103	0.5044830E-02	0.1135341
08152011	09	0.001	0.060	0.042	0.001	0.002	0.001	0.003	0.003	0.052	0.001	0.041	296.782	0.743	0.000000	4.707945	0.6513651E-02	-0.1409931
08152011	10	0.001	0.090	0.063	0.000	0.002	0.001	0.003	0.004	0.056	0.001	0.058	298.817	0.620	0.1611710E-03	4.436562	0.3387243E-02	0.1172002
08152011	11	0.000	0.091	0.078	0.000	0.001	0.001	0.003	0.004	0.054	0.001	0.078	300.713	0.540	0.5841255E-05	5.837261	0.1530882E-01	-0.4187326
08152011	12	0.000	0.067	0.069	0.000	0.001	0.001	0.003	0.004	0.050	0.002	0.079	302.657	0.468	0.1370907E-05	5.146802	0.1975448E-01	-0.5841281
08152011	13	0.000	0.056	0.057	0.000	0.001	0.001	0.002	0.004	0.049	0.002	0.076	304.433	0.405	0.2980232E-06	4.136462	0.1841898E-01	-0.6486365
08152011	14	0.000	0.046	0.045	0.001	0.001	0.000	0.002	0.004	0.048	0.002	0.072	305.231	0.377	0.000000	3.451309	0.1728258E-01	-0.6996247
08152011	15	0.000	0.042	0.038	0.001	0.001	0.000	0.002	0.004	0.049	0.002	0.070	304.817	0.386	0.000000	3.277852	0.1426594E-01	-0.6387112
08152011	16	0.000	0.040	0.035	0.000	0.001	0.000	0.002	0.004	0.050	0.002	0.070	303.871	0.412	0.2980232E-06	3.420688	0.1332079E-01	-0.5904165
08152011	17	0.000	0.042	0.032	0.000	0.001	0.000	0.002	0.004	0.052	0.002	0.071	302.563	0.445	0.6556511E-06	3.848344	0.1248745E-01	-0.5111998
08152011	18	0.000	0.043	0.029	0.000	0.001	0.000	0.002	0.004	0.054	0.001	0.073	301.233	0.479	0.1370907E-05	4.327240	0.1269975E-01	-0.4675844
08152011	19	0.000	0.037	0.023	0.000	0.001	0.001	0.002	0.004	0.057	0.001	0.074	300.305	0.509	0.3755093E-05	4.643983	0.9007493E-02	-0.2877133
08152011	20	0.000	0.031	0.020	0.000	0.001	0.001	0.003	0.005	0.060	0.001	0.073	298.770	0.552	0.1597404E-04	4.688296	0.4266346E-02	0.4095899E-01
08152011	21	0.000	0.029	0.018	0.000	0.001	0.001	0.003	0.006	0.065	0.001	0.073	297.559	0.596	0.8016825E-04	5.179795	0.3233436E-02	0.2046483
08152011	22	0.001	0.025	0.016	0.000	0.001	0.001	0.004	0.007	0.071	0.001	0.075	296.568	0.647	0.2651215E-03	6.194442	0.4922284E-02	0.9983547E-01
08152011	23	0.001	0.020	0.012	0.001	0.002	0.001	0.004	0.007	0.079	0.001	0.080	295.782	0.696	0.000000	8.011838	0.7975320E-02	0.1984051E-02
08152011	24	0.001	0.017	0.009	0.001	0.002	0.001	0.005	0.008	0.087	0.001	0.085	295.296	0.723	0.000000	9.051430	0.1007870E-01	-0.4668725E-01
08162011	01	0.001	0.016	0.008	0.001	0.002	0.001	0.005	0.009	0.096	0.002	0.090	294.610	0.784	0.000000	12.21697	0.1322804E-01	-0.3453186E-01
08162011	02	0.001	0.016	0.009	0.001	0.003	0.001	0.005	0.009	0.103	0.002	0.093	294.109	0.824	0.000000	15.35467	0.1451655E-01	0.2437709E-01
08162011	03	0.001	0.016	0.010	0.001	0.003	0.001	0.006	0.009	0.111	0.002	0.096	293.740	0.843	0.000000	17.63946	0.1470879E-01	0.7890836E-01
08162011	04	0.001	0.025	0.018	0.001	0.003	0.001	0.006	0.010	0.116	0.002	0.099	293.361	0.860	0.000000	20.42704	0.1479424E-01	0.1401129
08162011	05	0.001	0.037	0.029	0.000	0.003	0.001	0.006	0.010	0.117	0.002	0.102	293.000	0.875	0.1563591E-01	24.61798	0.1619421E-01	0.1818925
08162011	06	0.001	0.039	0.030	0.000	0.003	0.001	0.006	0.010	0.117	0.002	0.104	292.729	0.887	0.1822954E-01	27.48499	0.1721203E-01	0.2032637
08162011	07	0.001	0.050	0.038	0.000	0.003	0.001	0.006	0.010	0.115	0.002	0.106	292.541	0.906	0.2511019E-01	34.26753	0.1917940E-01	0.2520478
08162011	08	0.001	0.078	0.061	0.000	0.003	0.001	0.006	0.009	0.106	0.002	0.112	293.794	0.873	0.7356286E-02	26.54808	0.2227584E-01	0.7619914E-01
08162011	09	0.000	0.111	0.080	0.000	0.003	0.001	0.005	0.009	0.093	0.002	0.118	296.339	0.772	0.7644296E-03	17.24367	0.2175369E-01	-0.1009031
08162011	10	0.000	0.155	0.100	0.000	0.002	0.001	0.005	0.008	0.078	0.001	0.120	298.909	0.662	0.7766485E-04	13.09704	0.3039042E-01	-0.3655637
08162011	11	0.000	0.154	0.116	0.000	0.002	0.001	0.004	0.007	0.068	0.001	0.119	301.077	0.565	0.1078844E-04	10.47338	0.3858192E-01	-0.5662970
08162011	12	0.000	0.130	0.110	0.000	0.001	0.001	0.003	0.006	0.061	0.001	0.118	302.844	0.505	0.4351139E-05	9.807888	0.4705881E-01	-0.6810654
08162011	13	0.000	0.114	0.095	0.000	0.001	0.001	0.003	0.006	0.056	0.001	0.113	304.690	0.449	0.1430511E-05	8.185966	0.4634349E-01	-0.7529188
08162011	14	0.000	0.106	0.086	0.000	0.001	0.001	0.003	0.005	0.054	0.001	0.111	305.836	0.417	0.7748604E-06	7.622548	0.4710473E-01	-0.7909644
08162011	15	0.000	0.099	0.076	0.000	0.001	0.001	0.003	0.005	0.052	0.001	0.106	305.993	0.407	0.5960464E-06	7.028054	0.4395811E-01	-0.7962039
08162011	16	0.000	0.088	0.065	0.000	0.001	0.001	0.003	0.005	0.050	0.001	0.098	305.676	0.407	0.5960464E-06	6.297000	0.3781525E-01	-0.7785333
08162011	17	0.000	0.078	0.052	0.000	0.001	0.001	0.002	0.005	0.048	0.001	0.092	304.478	0.418	0.7152557E-06	6.005533	0.3486099E-01	-0.7637883
08162011	18	0.000	0.069	0.039	0.000	0.001	0.001	0.003	0.005	0.051	0.001	0.091	303.813	0.430	0.7748604E-06	5.763157	0.2976855E-01	-0.7130972
08162011	19	0.000	0.056	0.026	0.000	0.001	0.001	0.003	0.005	0.055	0.001	0.090	302.251	0.520	0.3933907E-05	6.895061	0.2534670E-01	-0.5653834
08162011	20	0.000	0.054	0.021	0.001	0.001	0.001	0.003	0.006	0.062	0.001	0.092	300.888	0.457	0.000000	5.429717	0.1877392E-01	-0.5387776
08162011	21	0.000	0.054	0.013	0.002	0.002	0.001	0.004	0.007	0.076	0.001	0.095	299.252	0.512	0.000000	5.350722	0.5648522E-02	-0.2352245E-01
08162011	22	0.001	0.063	0.015	0.002	0.002	0.001	0.004	0.007	0.099	0.001	0.098	298.102	0.563	0.000000	5.930634	0.3781353E-02	0.1954539
08162011	23	0.001	0.072	0.016	0.002	0.002	0.001	0.004	0.008	0.125	0.001	0.099	297.123	0.616	0.000000	6.986804	0.2303386E-01	-0.5180883
08162011	24	0.002	0.074	0.016	0.002	0.002	0.002	0.005	0.010	0.142	0.002	0.100	296.193	0.683	0.000000	9.166504	0.1404690E-01	-0.1853768
08172011	01	0.004	0.075	0.016	0.001	0.002	0.002	0.005	0.011	0.150	0.002	0.099	295.514	0.738	0.000000	11.59394	0.8736572E-02	0.1228900
08172011	02	0.006	0.076	0.015	0.001	0.003	0.002	0.006	0.012	0.149	0.002	0.096	294.795	0.803	0.2329111E-02	14.48280	0.5849515E-02	0.3937328
08172011	03	0.006	0.077	0.017	0.001	0.003	0.002	0.006	0.013	0.144	0.002	0.091	294.500	0.815	0.2737820E-02	17.45047	0.6080175E-02	0.4578911
08172011	04	0.006	0.074	0.019	0.001	0.003	0.002	0.006	0.013	0.138	0.002	0.087	294.332	0.816	0.2555549E-02	17.45047	0.6022664E-02	0.4620186
08172011	05	0.006	0.069	0.020	0.001	0.003	0.002	0.006	0.014	0.130	0.002	0.084	294.267	0.811	0.2212942E-02	15.89352	0.5839800E-02	0.4348221
08172011	06	0.006	0.064	0.021	0.001	0.003	0.002	0.007	0.014	0.120	0.002	0.081	294.306	0.803	0.1626253E-02	13.61448	0.5477933E-02	0.3953844
08172011	07	0.005	0.061	0.023	0.001	0.003	0.002	0.007	0.015	0.113	0.002	0.079	294.689	0.796	0.1179457E-02	12.41379	0.5312006E-02	0.3686460
08172011	08	0.005	0.058	0.028	0.000	0.004	0.002	0.008	0.016	0.105	0.001	0.077	297.131	0.729	0.5040425E-01	9.016122	0.6602679E-02	0.1352996
08172011	09	0.002	0.182	0.079	0.000	0.004	0.002	0.006	0.013	0.088	0.001	0.074	299.001	0.659	0.1866281E-02	5.801090	0.9218562E-02	-0.2011536
08172011	10	0.001	0.208	0.070	0.000	0.003	0.001	0.004	0.008	0.085	0.001	0.071	301.203	0.582	0.2582073E-03	4.209013	0.9163413E-02	-0.3378769
08172011	11	0.001	0.194	0.060	0.000	0.002	0.001	0.003	0.006	0.089	0.000	0.069	303.468	0.482	0.9602308E-04	2.935010	0.8509216E-02	-0.4622800
08172011	12	0.001	0.145	0.053	0.000	0.001	0.001	0.002	0.004	0.087	0.000	0.070	304.880	0.435	0.4905462E-04	2.665788	0.3685739E-02	-0.1406990
08172011	13	0.001	0.115	0.050	0.000	0.001	0.001	0.002	0.004	0.076	0.000	0.071	306.276	0.397	0.1829863E-04	2.381032	0.1399868E-02	0.2306784
08172011	14	0.000	0.097	0.049	0.000	0.001	0.001	0.002	0.004	0.067	0.000	0.069	307.190	0.373	0.6079674E-05	2.069542	0.7008354E-03	0.4702583
08172011	15	0.000	0.082	0.050	0.000	0.001	0.001	0.002	0.004	0.059	0.000	0.066	307.182	0.370	0.1907349E-05	1.979894	0.4894321E-03	0.6069494
08172011	16	0.000	0.073	0.050	0.000	0.001	0.001	0.002	0.004	0.054	0.000	0.063	306.791	0.376	0.5960464E-06	2.083035	0.7425853E-03	0.4479502
08172011	17	0.000	0.068	0.049	0.000	0.001	0.001	0.002	0.004	0.052	0.000	0.061	306.065	0.387	0.7152557E-06	2.102739	0.7816983E-03	0.4297462
08172011	18	0.000	0.062	0.043	0.000	0.001	0.001	0.002	0.004	0.053	0.000	0.061	305.719	0.379	0.1430511E-05	1.946889	0.5058445E-03	0.5853243
08172011	19	0.000	0.058	0.040	0.000	0.001	0.001	0.002	0.005	0.056	0.000	0.061	304.893	0.382	0.5483627E-05	1.877801	0.5705510E-03	0.5173551
08172011	20	0.001	0.056	0.035	0.000	0.001	0.001	0.003	0.006	0.061	0.000	0.061	302.828	0.428	0.2521276E-04	2.203579	0.1353793E-02	0.2115764
08172011	21	0.001	0.054	0.029	0.000	0.001	0.001	0.003	0.007	0.064	0.000	0.061	301.129	0.482	0.5483627E-04	2.582072	0.2447725E-02	0.2320569E-01
08172011	22	0.001	0.054	0.023	0.000	0.001	0.001	0.004	0.008	0.066	0.000	0.062	299.785	0.540	0.1179576E-03	3.169616	0.4133112E-02	-0.1152706
08172011	23	0.001	0.058	0.019	0.000	0.001	0.001	0.004	0.008	0.068	0.001	0.063	298.679	0.604	0.2276301E-03	4.008531	0.6178142E-02	-0.1878726
08172011	24	0.001	0.069	0.017	0.000	0.001	0.001	0.004	0.009	0.068	0.001	0.065	297.701	0.677	0.5197525E-03	5.528483	0.6745042E-02	-0.8637868E-01
08182011	01	0.001	0.083	0.015	0.001	0.001	0.002	0.004	0.009	0.068	0.001	0.068	296.835	0.758	0.000000	8.207966	0.7863805E-02	0.1860282E-01
08182011	02	0.001	0.097	0.013	0.001	0.002	0.002	0.004	0.009	0.067	0.001	0.073	296.301	0.796	0.000000	10.91312	0.9469688E-02	0.6161329E-01
08182011	03	0.001	0.107	0.012	0.001	0.002	0.002	0.005	0.009	0.066	0.001	0.078	295.838	0.826	0.000000	13.93168	0.1201368E-01	0.6432740E-01
08182011	04	0.001	0.109	0.010	0.001	0.002	0.002	0.005	0.009	0.066	0.001	0.082	295.492	0.843	0.000000	15.75828	0.1448219E-01	0.3667476E-01
08182011	05	0.000	0.102	0.009	0.001	0.002	0.002	0.005	0.009	0.067	0.001	0.084	295.250	0.846	0.000000	17.61438	0.1625836E-01	0.3479040E-01
08182011	06	0.000	0.091	0.009	0.001	0.002	0.002	0.005	0.010	0.068	0.001	0.086	295.021	0.851	0.000000	17.84321	0.1661775E-01	0.3090073E-01
08182011	07	0.001	0.081	0.008	0.001	0.002	0.002	0.006	0.010	0.069	0.001	0.086	294.942	0.865	0.000000	19.84639	0.1659447E-01	0.7771807E-01
08182011	08	0.001	0.080	0.016	0.000	0.003	0.002	0.006	0.010	0.070	0.001	0.087	296.614	0.808	0.1585662E-02	14.08495	0.1263367E-01	0.4722582E-01
08182011	09	0.000	0.108	0.047	0.000	0.004	0.001	0.005	0.008	0.069	0.001	0.090	299.090	0.707	0.2210140E-03	10.02468	0.1059453E-01	-0.2401128E-01
08182011	10	0.000	0.111	0.054	0.000	0.004	0.001	0.004	0.007	0.068	0.000	0.089	301.572	0.609	0.3492832E-04	7.088173	0.7609773E-02	-0.3083741E-01
08182011	11	0.000	0.089	0.058	0.000	0.003	0.001	0.004	0.006	0.068	0.000	0.088	304.128	0.501	0.3397465E-05	4.931695	0.6105675E-02	-0.9273747E-01
08182011	12	0.000	0.071	0.060	0.000	0.002	0.001	0.003	0.006	0.065	0.000	0.084	305.938	0.437	0.7152557E-06	3.900053	0.6480766E-02	-0.2205558
08182011	13	0.000	0.067	0.059	0.000	0.002	0.001	0.003	0.005	0.061	0.000	0.076	307.809	0.384	0.1788139E-06	2.703805	0.3254247E-02	-0.8047510E-01
08182011	14	0.000	0.067	0.053	0.000	0.002	0.001	0.003	0.005	0.057	0.000	0.070	308.816	0.361	0.1192093E-06	2.178097	0.1323420E-02	0.2163797
08182011	15	0.000	0.067	0.047	0.000	0.001	0.001	0.002	0.004	0.052	0.000	0.063	308.555	0.370	0.1788139E-06	2.137160	0.2228283E-02	-0.1813338E-01
08182011	16	0.000	0.070	0.042	0.000	0.001	0.001	0.002	0.004	0.049	0.000	0.059	307.802	0.391	0.2980232E-06	2.105444	0.1405557E-02	0.1754951
08182011	17	0.000	0.072	0.038	0.000	0.001	0.001	0.002	0.004	0.048	0.000	0.056	306.753	0.418	0.2264977E-05	2.103638	0.7181925E-03	0.4667301
08182011	18	0.000	0.068	0.031	0.000	0.001	0.001	0.002	0.004	0.050	0.000	0.055	305.775	0.433	0.8106232E-05	2.113505	0.7852483E-03	0.4299963
08182011	19	0.001	0.061	0.025	0.000	0.001	0.001	0.002	0.005	0.054	0.000	0.056	304.726	0.456	0.2378225E-04	2.334260	0.1291199E-02	0.2571560
08182011	20	0.001	0.052	0.021	0.000	0.001	0.001	0.003	0.006	0.058	0.000	0.056	302.945	0.503	0.5912781E-04	2.586607	0.2303608E-02	0.5032180E-01
08182011	21	0.001	0.049	0.021	0.000	0.001	0.001	0.004	0.007	0.060	0.000	0.055	301.520	0.549	0.1285076E-03	2.903169	0.4174521E-02	-0.1577343
08182011	22	0.001	0.045	0.021	0.000	0.001	0.001	0.004	0.007	0.061	0.000	0.055	300.354	0.602	0.2247095E-03	3.470897	0.5395509E-02	-0.1915907
08182011	23	0.001	0.040	0.020	0.000	0.001	0.001	0.004	0.008	0.061	0.000	0.055	299.395	0.660	0.4518628E-03	4.221292	0.6473496E-02	-0.1856935
08182011	24	0.002	0.034	0.019	0.000	0.002	0.001	0.004	0.008	0.061	0.000	0.055	298.568	0.721	0.1016915E-02	5.322923	0.7389808E-02	-0.1424830
08192011	01	0.001	0.028	0.017	0.000	0.002	0.001	0.004	0.008	0.060	0.000	0.055	297.812	0.787	0.2047479E-02	7.288001	0.7060520E-02	0.1377172E-01
08192011	02	0.001	0.023	0.015	0.000	0.002	0.001	0.005	0.008	0.060	0.000	0.056	297.259	0.835	0.4063189E-02	9.701701	0.7212585E-02	0.1287569
08192011	03	0.001	0.019	0.013	0.000	0.002	0.001	0.005	0.007	0.059	0.000	0.056	296.911	0.860	0.4956841E-02	11.34644	0.7701811E-02	0.1682669
08192011	04	0.001	0.016	0.012	0.000	0.002	0.001	0.005	0.007	0.058	0.000	0.056	296.647	0.875	0.6683707E-02	13.18381	0.8000101E-02	0.2169455
08192011	05	0.001	0.014	0.012	0.000	0.002	0.001	0.005	0.007	0.058	0.000	0.056	296.424	0.889	0.8156598E-02	14.33587	0.8141834E-02	0.2457018
08192011	06	0.001	0.013	0.013	0.000	0.002	0.001	0.005	0.007	0.058	0.000	0.055	296.252	0.903	0.1051545E-01	15.29547	0.7957964E-02	0.2837608
08192011	07	0.002	0.013	0.013	0.000	0.002	0.001	0.005	0.008	0.059	0.000	0.055	296.382	0.913	0.1520056E-01	16.45602	0.7492734E-02	0.3416846
08192011	08	0.002	0.013	0.013	0.000	0.002	0.001	0.004	0.007	0.059	0.000	0.055	298.131	0.857	0.4826725E-02	11.05861	0.7462404E-02	0.1708219
08192011	09	0.001	0.023	0.016	0.000	0.002	0.001	0.004	0.005	0.058	0.000	0.060	300.336	0.767	0.8223057E-03	8.105430	0.6612637E-02	0.8840138E-01
08192011	10	0.001	0.042	0.020	0.000	0.003	0.001	0.003	0.005	0.060	0.001	0.061	302.554	0.666	0.2707839E-03	5.510396	0.4469201E-02	0.9095301E-01
08192011	11	0.001	0.154	0.030	0.000	0.003	0.001	0.003	0.005	0.062	0.001	0.062	304.598	0.569	0.1037121E-03	3.888614	0.2991111E-02	0.1139623
08192011	12	0.001	0.195	0.037	0.000	0.002	0.001	0.003	0.005	0.060	0.001	0.063	306.047	0.513	0.4214048E-04	3.203462	0.1869611E-02	0.2338682
08192011	13	0.001	0.174	0.040	0.000	0.002	0.001	0.002	0.005	0.057	0.001	0.063	307.605	0.461	0.1513958E-04	2.705825	0.1231839E-02	0.3417459
08192011	14	0.000	0.155	0.038	0.000	0.002	0.001	0.002	0.005	0.055	0.000	0.063	308.636	0.428	0.5662441E-05	2.431750	0.9074277E-03	0.4281069
08192011	15	0.000	0.121	0.033	0.000	0.002	0.001	0.002	0.004	0.049	0.000	0.059	308.774	0.418	0.1132488E-05	2.299866	0.1031281E-02	0.3483257
08192011	16	0.000	0.081	0.028	0.000	0.001	0.001	0.002	0.004	0.042	0.000	0.056	308.413	0.420	0.2980232E-06	2.539162	0.5270833E-02	-0.3171889
08192011	17	0.000	0.055	0.023	0.000	0.001	0.000	0.002	0.003	0.037	0.000	0.054	307.732	0.429	0.2384186E-06	2.890223	0.1129363E-01	-0.5919023
08192011	18	0.000	0.035	0.013	0.000	0.001	0.000	0.001	0.003	0.035	0.000	0.049	306.320	0.483	0.6556511E-06	2.960181	0.9444951E-02	-0.5038815
08192011	19	0.000	0.017	0.006	0.001	0.001	0.000	0.001	0.003	0.035	0.000	0.040	304.465	0.569	0.000000	2.580001	0.1820455E-02	0.1514399
08192011	20	0.001	0.010	0.005	0.001	0.001	0.000	0.002	0.003	0.035	0.000	0.035	303.271	0.542	0.000000	1.900742	0.1576249E-02	0.8129849E-01
08192011	21	0.001	0.007	0.005	0.001	0.001	0.001	0.002	0.003	0.037	0.000	0.034	302.140	0.564	0.000000	2.002807	0.2757028E-02	-0.1388020
08192011	22	0.001	0.006	0.005	0.001	0.001	0.001	0.002	0.003	0.039	0.000	0.034	301.069	0.618	0.000000	2.453338	0.3944959E-02	-0.2062851
08192011	23	0.001	0.004	0.004	0.001	0.001	0.001	0.002	0.003	0.038	0.000	0.033	300.117	0.690	0.000000	3.069182	0.4371773E-02	-0.1536350
08192011	24	0.001	0.003	0.003	0.002	0.001	0.001	0.002	0.003	0.033	0.000	0.029	299.239	0.756	0.000000	3.526744	0.4202268E-02	-0.7610976E-01
08202011	01	0.001	0.002	0.003	0.002	0.001	0.000	0.001	0.002	0.029	0.000	0.027	298.190	0.838	0.000000	5.170959	0.4646389E-02	0.4645552E-01
08202011	02	0.001	0.004	0.003	0.001	0.001	0.000	0.001	0.002	0.025	0.000	0.025	297.508	0.884	0.000000	6.322798	0.4850558E-02	0.1151177
08202011	03	0.001	0.004	0.003	0.001	0.001	0.000	0.001	0.002	0.020	0.000	0.025	297.109	0.920	0.000000	9.765096	0.6855649E-02	0.1536280
08202011	04	0.000	0.002	0.002	0.001	0.001	0.000	0.001	0.001	0.017	0.000	0.026	296.801	0.942	0.000000	14.50646	0.1144456E-01	0.1029624
08202011	05	0.000	0.001	0.002	0.001	0.001	0.000	0.001	0.001	0.014	0.000	0.027	296.709	0.942	0.000000	15.56982	0.1463077E-01	0.2701633E-01
08202011	06	0.000	0.001	0.002	0.001	0.001	0.000	0.001	0.001	0.012	0.000	0.027	296.649	0.933	0.000000	13.81334	0.1602069E-01	-0.6438259E-01
08202011	07	0.000	0.005	0.003	0.001	0.001	0.000	0.001	0.001	0.014	0.000	0.032	296.601	0.938	0.000000	18.94820	0.1988607E-01	-0.2098106E-01
08202011	08	0.000	0.019	0.008	0.001	0.002	0.001	0.001	0.003	0.027	0.001	0.055	297.900	0.904	0.1705110E-02	19.90599	0.2730197E-01	-0.1372102
08202011	09	0.000	0.038	0.020	0.001	0.003	0.001	0.002	0.006	0.038	0.001	0.077	299.805	0.834	0.5279183E-03	17.25548	0.3312867E-01	-0.2832770
08202011	10	0.000	0.036	0.030	0.001	0.003	0.001	0.003	0.007	0.043	0.001	0.084	301.866	0.758	0.1611114E-03	13.70188	0.3130805E-01	-0.3588759
08202011	11	0.000	0.028	0.040	0.000	0.002	0.001	0.002	0.006	0.044	0.001	0.075	304.460	0.646	0.2300739E-04	8.170335	0.2146971E-01	-0.4195864
08202011	12	0.000	0.019	0.042	0.000	0.001	0.001	0.002	0.004	0.036	0.001	0.053	306.332	0.560	0.3933907E-05	4.058131	0.8941273E-02	-0.3430733
08202011	13	0.000	0.012	0.033	0.000	0.001	0.000	0.001	0.002	0.026	0.000	0.037	307.816	0.503	0.5960464E-06	2.407802	0.7419972E-02	-0.4887815
08202011	14	0.000	0.004	0.018	0.000	0.001	0.000	0.001	0.002	0.021	0.000	0.028	306.303	0.546	0.1549721E-05	1.914285	0.3575135E-02	-0.2712857
08202011	15	0.000	0.001	0.009	0.000	0.000	0.000	0.001	0.001	0.017	0.000	0.020	306.106	0.553	0.1668930E-05	1.301683	0.1611698E-02	-0.9277844E-01
08202011	16	0.000	0.000	0.007	0.000	0.000	0.000	0.000	0.001	0.013	0.000	0.015	304.651	0.597	0.3039837E-05	1.156193	0.1711754E-02	-0.1704113
08202011	17	0.001	0.000	0.005	0.000	0.000	0.000	0.000	0.001	0.011	0.000	0.011	303.446	0.643	0.2646446E-04	0.8569096	0.1199448E-02	-0.1460466
08202011	18	0.001	0.000	0.003	0.001	0.000	0.000	0.001	0.001	0.011	0.000	0.009	302.199	0.715	0.000000	0.8990715	0.2145959E-02	-0.3778271
08202011	19	0.002	0.001	0.003	0.001	0.000	0.000	0.001	0.001	0.012	0.000	0.010	301.035	0.772	0.000000	1.265115	0.2372184E-02	-0.2730184
08202011	20	0.002	0.001	0.002	0.001	0.001	0.000	0.001	0.002	0.015	0.000	0.012	299.896	0.785	0.000000	1.618728	0.2520801E-02	-0.1923647
08202011	21	0.002	0.001	0.002	0.001	0.001	0.000	0.001	0.002	0.018	0.000	0.015	299.142	0.790	0.000000	2.033269	0.2919253E-02	-0.1570769
08202011	22	0.002	0.002	0.002	0.002	0.001	0.001	0.002	0.002	0.022	0.000	0.019	298.464	0.830	0.000000	3.288821	0.3122092E-02	0.2259459E-01
08202011	23	0.002	0.003	0.002	0.002	0.002	0.001	0.002	0.003	0.027	0.000	0.025	297.969	0.870	0.000000	5.408455	0.3840992E-02	0.1486299
08202011	24	0.002	0.004	0.002	0.002	0.002	0.001	0.002	0.003	0.034	0.000	0.032	297.500	0.912	0.000000	10.22473	0.5170751E-02	0.2960984
08212011	01	0.002	0.006	0.002	0.002	0.002	0.001	0.002	0.003	0.039	0.000	0.036	297.254	0.931	0.000000	14.91655	0.6033979E-02	0.3930646
08212011	02	0.002	0.008	0.002	0.002	0.002	0.001	0.002	0.003	0.043	0.000	0.037	297.233	0.912	0.000000	11.89140	0.5704048E-02	0.3190498
08212011	03	0.002	0.010	0.002	0.002	0.002	0.001	0.003	0.004	0.045	0.000	0.037	296.944	0.941	0.000000	17.42811	0.5202323E-02	0.5250529
08212011	04	0.003	0.011	0.002	0.002	0.002	0.001	0.003	0.003	0.046	0.000	0.036	296.983	0.940	0.000000	17.50864	0.5005771E-02	0.5437813
08212011	05	0.003	0.010	0.002	0.001	0.002	0.001	0.003	0.003	0.046	0.000	0.036	297.005	0.938	0.000000	17.50864	0.4995016E-02	0.5447155
08212011	06	0.003	0.009	0.002	0.001	0.002	0.001	0.003	0.003	0.046	0.000	0.035	297.008	0.939	0.000000	17.04272	0.4733583E-02	0.5563489
08212011	07	0.003	0.007	0.002	0.001	0.002	0.001	0.002	0.003	0.046	0.000	0.033	297.219	0.940	0.000000	16.07646	0.4411224E-02	0.5616314
08212011	08	0.002	0.006	0.003	0.002	0.002	0.001	0.002	0.002	0.038	0.000	0.030	299.007	0.882	0.000000	7.447879	0.4697436E-02	0.2001718
08212011	09	0.001	0.008	0.007	0.001	0.002	0.000	0.001	0.002	0.023	0.000	0.025	300.388	0.833	0.000000	4.602780	0.4244362E-02	0.3520780E-01
08212011	10	0.000	0.006	0.010	0.000	0.001	0.000	0.001	0.001	0.015	0.000	0.021	301.933	0.769	0.6842613E-04	3.322167	0.5181219E-02	-0.1930105
08212011	11	0.000	0.004	0.012	0.000	0.001	0.000	0.001	0.001	0.014	0.000	0.018	303.499	0.711	0.2712011E-04	2.099568	0.2742340E-02	-0.1159913
08212011	12	0.001	0.003	0.014	0.000	0.001	0.000	0.001	0.001	0.015	0.000	0.018	305.412	0.645	0.2270937E-04	1.578463	0.1533063E-02	0.1267433E-01
08212011	13	0.001	0.004	0.018	0.000	0.001	0.000	0.001	0.001	0.017	0.000	0.018	307.088	0.575	0.1937151E-04	1.150945	0.1238358E-02	-0.3179157E-01
08212011	14	0.001	0.003	0.014	0.001	0.000	0.000	0.001	0.001	0.017	0.000	0.016	305.585	0.626	0.000000	1.216097	0.1664682E-02	-0.1363630
08212011	15	0.002	0.001	0.009	0.001	0.000	0.000	0.001	0.001	0.015	0.000	0.013	305.289	0.638	0.000000	0.9627935	0.2348736E-02	-0.3873010
08212011	16	0.003	0.001	0.008	0.001	0.000	0.000	0.001	0.001	0.017	0.000	0.013	305.408	0.624	0.000000	0.9761839	0.3310829E-02	-0.5304052
08212011	17	0.003	0.001	0.008	0.001	0.000	0.000	0.001	0.001	0.017	0.000	0.013	305.513	0.597	0.000000	0.9118083	0.3311364E-02	-0.5601033
08212011	18	0.003	0.001	0.007	0.000	0.000	0.000	0.001	0.001	0.016	0.000	0.012	305.334	0.588	0.2766252E-03	0.8304828	0.3255296E-02	-0.5932598
08212011	19	0.003	0.001	0.006	0.000	0.000	0.000	0.001	0.001	0.014	0.000	0.010	303.946	0.624	0.7484317E-02	0.7984609	0.2928161E-02	-0.5643412
08212011	20	0.003	0.000	0.004	0.001	0.000	0.000	0.001	0.001	0.014	0.000	0.010	301.995	0.723	0.2956390E-04	1.110728	0.2675999E-02	-0.3818783
08212011	21	0.004	0.000	0.003	0.001	0.000	0.000	0.001	0.001	0.016	0.000	0.009	300.896	0.759	0.1553679E-01	1.146583	0.1842903E-04	1.793903
08212011	22	0.005	0.000	0.002	0.001	0.000	0.000	0.001	0.001	0.016	0.000	0.010	300.027	0.806	0.2571988E-01	1.607891	0.2020806E-04	1.900732
08212011	23	0.004	0.000	0.002	0.002	0.001	0.000	0.001	0.001	0.017	0.000	0.010	299.530	0.835	0.2753747E-01	1.900973	0.2406142E-04	1.897655
08212011	24	0.002	0.000	0.001	0.002	0.001	0.000	0.001	0.001	0.018	0.000	0.011	299.238	0.840	0.3906339E-01	2.111944	0.2179436E-04	1.986338
08222011	01	0.003	0.001	0.001	0.001	0.001	0.000	0.001	0.001	0.018	0.000	0.012	298.574	0.915	0.7831657E-01	4.483654	0.3010338E-04	2.173017
08222011	02	0.002	0.002	0.001	0.001	0.002	0.000	0.001	0.001	0.019	0.000	0.014	298.354	0.921	0.000000	5.233215	0.2769958E-02	0.2762954
08222011	03	0.002	0.004	0.002	0.001	0.002	0.000	0.001	0.001	0.020	0.000	0.016	298.045	0.934	0.000000	6.794509	0.3165871E-02	0.3316649
08222011	04	0.002	0.005	0.002	0.001	0.003	0.000	0.001	0.001	0.021	0.000	0.017	297.844	0.943	0.000000	8.536002	0.3231628E-02	0.4218332
08222011	05	0.002	0.006	0.002	0.001	0.004	0.000	0.001	0.001	0.022	0.000	0.018	297.749	0.947	0.000000	10.95183	0.3320161E-02	0.5183276
08222011	06	0.003	0.006	0.002	0.001	0.004	0.000	0.001	0.001	0.022	0.000	0.018	297.649	0.946	0.000000	11.01051	0.3239555E-02	0.5313222
08222011	07	0.002	0.005	0.002	0.001	0.003	0.000	0.001	0.001	0.021	0.000	0.017	297.635	0.941	0.000000	8.536002	0.3207348E-02	0.4251085
08222011	08	0.002	0.004	0.003	0.001	0.002	0.000	0.001	0.001	0.017	0.000	0.015	298.856	0.904	0.000000	4.408136	0.3001342E-02	0.1669395
08222011	09	0.002	0.002	0.003	0.001	0.001	0.000	0.001	0.001	0.012	0.000	0.010	300.849	0.838	0.000000	1.847605	0.2428135E-02	-0.1186636
08222011	10	0.003	0.002	0.003	0.000	0.001	0.000	0.001	0.001	0.009	0.000	0.007	302.847	0.759	-99999.00	0.9146910	0.1292339E-02	-0.1501021
08222011	11	0.004	0.009	0.007	0.000	0.000	0.000	0.001	0.001	0.010	0.000	0.007	304.849	0.666	-99999.00	0.7351286	0.3060273E-02	-0.6193968
08222011	12	0.002	0.031	0.017	0.000	0.000	0.000	0.001	0.002	0.015	0.000	0.013	306.116	0.609	0.9506941E-04	0.8233907	0.2778696E-02	-0.5282351
08222011	13	0.001	0.033	0.022	0.000	0.000	0.000	0.001	0.002	0.018	0.000	0.017	307.320	0.564	0.2700090E-04	0.9232613	0.1613784E-02	-0.2425207
08222011	14	0.001	0.030	0.021	0.000	0.000	0.000	0.001	0.002	0.021	0.000	0.020	308.290	0.531	0.1984835E-04	1.003989	0.1455950E-02	-0.1614174
08222011	15	0.001	0.022	0.018	0.000	0.000	0.000	0.001	0.002	0.021	0.000	0.022	308.434	0.514	0.1043081E-04	1.062466	0.9940939E-03	0.2888750E-01
08222011	16	0.001	0.018	0.015	0.000	0.000	0.000	0.001	0.002	0.023	0.000	0.022	308.291	0.505	0.1639128E-04	1.042397	0.1327601E-02	-0.1050345
08222011	17	0.003	0.017	0.012	0.000	0.000	0.000	0.001	0.001	0.027	0.000	0.021	307.478	0.509	0.4035234E-04	1.013751	0.3193827E-02	-0.4983800
08222011	18	0.006	0.012	0.010	0.001	0.001	0.000	0.002	0.002	0.032	0.000	0.020	306.782	0.526	0.7620513E-02	1.235857	0.2961538E-04	1.620451
08222011	19	0.005	0.005	0.007	0.001	0.001	0.000	0.002	0.002	0.031	0.000	0.021	304.491	0.576	0.5412102E-04	1.674231	0.4642495E-02	-0.4429361
08222011	20	0.002	0.004	0.006	0.001	0.001	0.000	0.002	0.001	0.030	0.000	0.024	302.996	0.601	0.000000	1.608096	0.3748050E-02	-0.3674933
08222011	21	0.002	0.005	0.006	0.001	0.001	0.000	0.002	0.001	0.031	0.000	0.025	302.076	0.611	0.000000	1.749040	0.3855332E-02	-0.3432619
08222011	22	0.004	0.008	0.007	0.001	0.001	0.000	0.003	0.002	0.038	0.000	0.026	301.316	0.635	0.000000	2.214530	0.4398680E-02	-0.2980408
08222011	23	0.015	0.012	0.007	0.002	0.002	0.001	0.004	0.004	0.035	0.001	0.025	299.981	0.721	0.2322024E-01	2.666181	0.7244533E-04	1.565879
08222011	24	0.020	0.018	0.006	0.003	0.003	0.001	0.005	0.007	0.028	0.001	0.025	299.104	0.785	0.2601588E-01	2.993129	0.6592105E-04	1.657101
08232011	01	0.018	0.024	0.005	0.004	0.003	0.002	0.006	0.009	0.025	0.001	0.027	298.588	0.828	0.3193897E-01	3.635194	0.6659343E-04	1.737096
08232011	02	0.017	0.029	0.005	0.004	0.004	0.002	0.007	0.010	0.027	0.001	0.030	298.182	0.866	0.4188991E-01	5.112496	0.8360251E-04	1.786414
08232011	03	0.015	0.032	0.005	0.004	0.004	0.002	0.007	0.010	0.033	0.001	0.034	298.038	0.856	0.4846841E-01	5.742127	0.1021287E-03	1.749925
08232011	04	0.016	0.036	0.005	0.003	0.004	0.002	0.007	0.010	0.038	0.001	0.036	297.871	0.855	0.5487680E-01	6.219453	0.1117728E-03	1.745416
08232011	05	0.015	0.038	0.005	0.003	0.005	0.002	0.007	0.010	0.041	0.001	0.037	297.711	0.845	0.5496091E-01	6.081862	0.1158575E-03	1.720112
08232011	06	0.015	0.039	0.005	0.004	0.005	0.001	0.007	0.009	0.040	0.001	0.037	297.845	0.797	0.4659253E-01	4.852075	0.1177363E-03	1.615017
08232011	07	0.017	0.036	0.005	0.004	0.005	0.001	0.008	0.009	0.039	0.001	0.036	297.788	0.821	0.4764414E-01	5.130306	0.1136603E-03	1.654534
08232011	08	0.019	0.032	0.010	0.004	0.005	0.001	0.008	0.009	0.037	0.002	0.035	300.171	0.765	0.2562702E-01	3.963576	0.1077440E-03	1.565694
08232011	09	0.018	0.047	0.019	0.003	0.005	0.001	0.008	0.009	0.036	0.002	0.035	302.353	0.655	0.1300842E-01	2.685832	0.9546789E-04	1.449221
08232011	10	0.014	0.105	0.026	0.001	0.004	0.001	0.006	0.007	0.043	0.002	0.034	303.806	0.597	0.9559512E-02	2.327370	0.9702159E-04	1.379997
08232011	11	0.008	0.137	0.029	0.001	0.003	0.001	0.004	0.005	0.050	0.001	0.035	305.665	0.505	0.7534027E-02	2.010334	0.8734306E-04	1.362040
08232011	12	0.002	0.215	0.034	0.000	0.002	0.000	0.003	0.003	0.052	0.001	0.043	307.079	0.449	0.3576279E-04	1.634525	0.3343470E-02	-0.3108059
08232011	13	0.001	0.231	0.038	0.000	0.001	0.000	0.002	0.003	0.049	0.001	0.050	308.486	0.397	0.6318092E-05	1.652464	0.8076217E-03	0.3109241
08232011	14	0.000	0.156	0.036	0.000	0.001	0.000	0.002	0.002	0.044	0.001	0.064	307.858	0.409	0.1788139E-06	3.415709	0.1530946E-01	-0.6514789
08232011	15	0.000	0.087	0.029	0.000	0.001	0.000	0.002	0.002	0.042	0.000	0.075	306.847	0.448	0.6556511E-06	5.293740	0.2877204E-01	-0.7352080
08232011	16	0.000	0.065	0.028	0.000	0.001	0.000	0.002	0.002	0.045	0.000	0.079	307.216	0.427	0.4768372E-06	5.257636	0.2969090E-01	-0.7518328
08232011	17	0.000	0.053	0.023	0.001	0.001	0.000	0.002	0.003	0.052	0.000	0.077	307.561	0.376	0.000000	3.789068	0.1929093E-01	-0.7068207
08232011	18	0.000	0.053	0.019	0.001	0.001	0.001	0.003	0.004	0.064	0.000	0.074	306.847	0.395	0.000000	2.661736	0.9830632E-03	0.4325835
08232011	19	0.001	0.063	0.016	0.001	0.002	0.001	0.004	0.005	0.074	0.001	0.070	304.390	0.481	0.000000	3.132706	0.2345940E-02	0.1256026
08232011	20	0.002	0.082	0.016	0.001	0.002	0.001	0.004	0.006	0.079	0.001	0.068	302.856	0.460	0.000000	2.698955	0.4397798E-02	-0.2120396
08232011	21	0.002	0.099	0.017	0.001	0.002	0.001	0.005	0.007	0.082	0.001	0.066	301.571	0.495	0.000000	2.981749	0.1189177E-01	-0.6007754
08232011	22	0.003	0.114	0.016	0.002	0.002	0.001	0.005	0.008	0.083	0.001	0.063	300.511	0.548	0.000000	3.585407	0.9599669E-02	-0.4277178
08232011	23	0.005	0.104	0.013	0.002	0.003	0.002	0.006	0.009	0.082	0.001	0.061	299.585	0.622	0.000000	4.668904	0.6239580E-02	-0.1259404
08232011	24	0.006	0.064	0.006	0.003	0.003	0.002	0.006	0.010	0.078	0.001	0.059	298.733	0.696	0.000000	5.781913	0.5216106E-02	0.4472513E-01
08242011	01	0.006	0.042	0.004	0.004	0.003	0.002	0.007	0.011	0.076	0.001	0.057	298.084	0.760	0.2878904E-04	7.896713	0.5409153E-02	0.1643171
08242011	02	0.005	0.032	0.003	0.004	0.003	0.002	0.007	0.010	0.073	0.001	0.056	297.644	0.801	0.000000	7.954105	0.4817812E-02	0.2177415
08242011	03	0.004	0.025	0.003	0.004	0.003	0.002	0.006	0.010	0.071	0.001	0.055	297.348	0.804	0.000000	7.742081	0.4927129E-02	0.1962638
08242011	04	0.004	0.024	0.003	0.004	0.003	0.002	0.005	0.009	0.070	0.001	0.054	297.112	0.786	0.000000	7.364723	0.5146192E-02	0.1556704
08242011	05	0.004	0.031	0.004	0.004	0.003	0.002	0.005	0.009	0.070	0.001	0.053	296.944	0.769	0.000000	6.673831	0.4806048E-02	0.1425871
08242011	06	0.003	0.041	0.006	0.003	0.003	0.001	0.004	0.008	0.071	0.002	0.053	296.673	0.761	0.000000	6.384070	0.5760717E-02	0.4462116E-01
08242011	07	0.004	0.047	0.007	0.002	0.003	0.002	0.004	0.008	0.072	0.002	0.053	296.552	0.759	0.000000	6.546827	0.4971475E-02	0.1195457
08242011	08	0.005	0.044	0.011	0.002	0.003	0.002	0.005	0.009	0.072	0.002	0.052	298.208	0.707	0.4594326E-03	6.020330	0.5122922E-02	0.7010256E-01
08242011	09	0.005	0.064	0.025	0.001	0.003	0.001	0.004	0.008	0.071	0.002	0.049	300.646	0.629	0.1493692E-03	4.444755	0.5755495E-02	-0.1122349
08242011	10	0.005	0.084	0.033	0.000	0.003	0.001	0.004	0.006	0.066	0.001	0.046	303.135	0.550	0.1251131E-01	2.997380	0.6137777E-02	-0.3112694
08242011	11	0.002	0.095	0.038	0.000	0.002	0.001	0.003	0.004	0.059	0.001	0.045	305.841	0.458	0.1138449E-03	1.937199	0.6269499E-02	-0.5100585
08242011	12	0.001	0.102	0.048	0.000	0.001	0.001	0.002	0.003	0.053	0.001	0.049	307.836	0.401	0.1692772E-04	1.641703	0.1512729E-02	0.3553367E-01
08242011	13	0.000	0.095	0.049	0.000	0.001	0.000	0.002	0.003	0.046	0.000	0.050	309.495	0.367	0.1490116E-05	1.468012	0.4696866E-03	0.4949215
08242011	14	0.000	0.077	0.041	0.000	0.001	0.000	0.001	0.002	0.039	0.000	0.044	310.391	0.350	0.1192093E-06	1.281102	0.1154015E-02	0.4537240E-01
08242011	15	0.000	0.061	0.035	0.000	0.001	0.000	0.001	0.002	0.034	0.000	0.038	310.028	0.355	0.2980232E-06	1.094710	0.3595703E-03	0.4835154
08242011	16	0.000	0.052	0.032	0.000	0.001	0.000	0.001	0.002	0.032	0.000	0.036	309.179	0.369	0.3576279E-06	1.083457	0.3678741E-03	0.4691125
08242011	17	0.000	0.048	0.030	0.000	0.001	0.000	0.001	0.002	0.031	0.000	0.034	308.024	0.388	0.1013279E-05	1.106731	0.4155584E-03	0.4254101
08242011	18	0.000	0.046	0.026	0.000	0.001	0.000	0.001	0.002	0.032	0.000	0.034	307.018	0.397	0.2264977E-05	1.149205	0.4734318E-03	0.3851400
08242011	19	0.001	0.045	0.023	0.000	0.001	0.000	0.001	0.002	0.036	0.000	0.035	305.789	0.412	0.7152557E-05	1.211550	0.7998293E-03	0.1803441
08242011	20	0.001	0.042	0.020	0.000	0.001	0.001	0.002	0.003	0.039	0.000	0.035	303.943	0.460	0.3612041E-04	1.434994	0.2221125E-02	-0.1897229
08242011	21	0.001	0.039	0.017	0.000	0.001	0.001	0.002	0.004	0.042	0.000	0.035	302.533	0.513	0.7945299E-04	1.635742	0.4647800E-02	-0.4535325
08242011	22	0.002	0.036	0.015	0.000	0.001	0.001	0.003	0.005	0.045	0.000	0.036	301.438	0.567	0.4000664E-03	2.163407	0.5609348E-02	-0.4137741
08242011	23	0.003	0.035	0.015	0.000	0.001	0.001	0.003	0.006	0.048	0.000	0.037	300.520	0.625	0.1851022E-02	2.771991	0.5156458E-02	-0.2695596
08242011	24	0.003	0.033	0.015	0.000	0.001	0.001	0.003	0.006	0.049	0.000	0.038	299.684	0.691	0.2560496E-02	3.468767	0.5173828E-02	-0.1736368
08252011	01	0.004	0.032	0.014	0.000	0.001	0.001	0.004	0.007	0.049	0.000	0.038	298.916	0.765	0.1573271E-01	4.641334	0.4424886E-02	0.2074070E-01
08252011	02	0.004	0.030	0.012	0.000	0.001	0.001	0.004	0.007	0.050	0.000	0.038	298.360	0.814	0.2981704E-01	5.564994	0.4423044E-02	0.9974339E-01
08252011	03	0.004	0.027	0.011	0.000	0.001	0.001	0.004	0.007	0.049	0.000	0.038	297.963	0.834	0.2531469E-01	6.131270	0.4439201E-02	0.1402456
08252011	04	0.003	0.026	0.009	0.000	0.001	0.001	0.004	0.007	0.049	0.000	0.038	297.639	0.837	0.2195692E-01	6.461234	0.4414281E-02	0.1654555
08252011	05	0.003	0.024	0.008	0.000	0.001	0.001	0.005	0.007	0.048	0.000	0.038	297.249	0.847	0.2531534E-01	6.843031	0.4295188E-02	0.2022663
08252011	06	0.003	0.022	0.007	0.000	0.002	0.001	0.005	0.007	0.048	0.000	0.038	296.915	0.854	0.3500742E-01	6.881349	0.4145524E-02	0.2200941
08252011	07	0.004	0.021	0.007	0.000	0.002	0.002	0.005	0.008	0.048	0.000	0.038	296.703	0.862	0.8420175E-01	8.605433	0.4402220E-02	0.2911009
08252011	08	0.004	0.025	0.011	0.000	0.002	0.002	0.006	0.008	0.047	0.000	0.038	298.183	0.811	0.5121326E-01	6.525886	0.4635780E-02	0.1485167
08252011	09	0.004	0.052	0.023	0.000	0.004	0.001	0.005	0.006	0.048	0.000	0.037	300.472	0.719	0.2205330E-01	4.186341	0.4888991E-02	-0.6738463E-01
08252011	10	0.008	0.073	0.027	0.000	0.004	0.001	0.005	0.005	0.051	0.001	0.036	302.962	0.616	-99999.00	3.146863	0.1430773E-01	-0.6576929
08252011	11	0.013	0.069	0.027	0.000	0.003	0.001	0.004	0.004	0.049	0.001	0.032	305.559	0.506	-99999.00	2.203100	0.8574515E-02	-0.5901753
08252011	12	0.007	0.047	0.028	0.000	0.002	0.001	0.003	0.003	0.048	0.000	0.030	307.463	0.436	-99999.00	1.598495	0.1505626E-01	-0.9740058
08252011	13	0.004	0.032	0.029	0.000	0.001	0.000	0.002	0.003	0.045	0.000	0.032	308.982	0.394	0.9596348E-04	1.143687	0.6014352E-02	-0.7208816
08252011	14	0.002	0.021	0.027	0.000	0.001	0.000	0.002	0.002	0.042	0.000	0.034	308.542	0.409	0.1841784E-04	1.109496	0.2572393E-02	-0.3652117
08252011	15	0.001	0.011	0.023	0.000	0.001	0.000	0.002	0.002	0.037	0.000	0.036	307.529	0.444	0.1186132E-04	1.389798	0.1095286E-02	0.1034240
08252011	16	0.001	0.005	0.017	0.000	0.001	0.000	0.001	0.002	0.036	0.000	0.035	307.417	0.448	0.1102686E-04	1.420424	0.1070136E-02	0.1229791
08252011	17	0.001	0.004	0.014	0.000	0.001	0.000	0.001	0.002	0.039	0.000	0.037	307.741	0.413	0.8106232E-05	1.280137	0.9726005E-03	0.1193220
08252011	18	0.001	0.005	0.014	0.000	0.001	0.000	0.002	0.002	0.044	0.000	0.038	307.068	0.420	0.1597404E-04	1.329093	0.1664322E-02	-0.9768193E-01
08252011	19	0.002	0.006	0.014	0.000	0.001	0.000	0.002	0.002	0.051	0.000	0.040	305.066	0.497	0.5358458E-04	1.853960	0.3905254E-02	-0.3235489
08252011	20	0.002	0.006	0.014	0.001	0.001	0.000	0.003	0.002	0.056	0.000	0.042	303.330	0.526	0.000000	2.175548	0.6222402E-02	-0.4563893
08252011	21	0.002	0.006	0.015	0.001	0.001	0.001	0.003	0.003	0.062	0.000	0.045	302.092	0.551	0.000000	2.678789	0.7461460E-02	-0.4448854
08252011	22	0.003	0.008	0.017	0.001	0.002	0.001	0.004	0.004	0.067	0.001	0.048	301.148	0.584	0.000000	3.251721	0.7200375E-02	-0.3452419
08252011	23	0.003	0.010	0.019	0.001	0.002	0.001	0.004	0.005	0.070	0.001	0.050	300.366	0.627	0.000000	3.955845	0.6903747E-02	-0.2418456
08252011	24	0.003	0.012	0.022	0.001	0.002	0.001	0.005	0.006	0.072	0.001	0.052	299.664	0.682	0.000000	4.807477	0.6519273E-02	-0.1322820
08262011	01	0.004	0.016	0.024	0.001	0.002	0.001	0.005	0.007	0.073	0.001	0.054	299.047	0.742	0.000000	6.116720	0.6356163E-02	-0.1667645E-01
08262011	02	0.004	0.021	0.026	0.001	0.003	0.002	0.006	0.008	0.076	0.001	0.057	298.608	0.787	0.000000	7.983964	0.5722651E-02	0.1446213
08262011	03	0.005	0.027	0.028	0.000	0.003	0.002	0.007	0.009	0.079	0.001	0.059	298.310	0.811	0.3263736E-01	8.997643	0.5963935E-02	0.1785958
08262011	04	0.005	0.033	0.032	0.000	0.003	0.002	0.007	0.010	0.081	0.001	0.061	298.023	0.829	0.3538650E-01	10.14725	0.6172042E-02	0.2159194
08262011	05	0.005	0.037	0.036	0.000	0.003	0.002	0.008	0.011	0.085	0.002	0.062	297.732	0.844	0.5038273E-01	12.04128	0.6589351E-02	0.2618302
08262011	06	0.005	0.040	0.037	0.000	0.004	0.002	0.008	0.011	0.089	0.004	0.062	297.438	0.860	0.6310725E-01	15.99309	0.7442356E-02	0.3322218
08262011	07	0.005	0.039	0.037	0.000	0.003	0.002	0.009	0.011	0.091	0.004	0.062	297.250	0.883	0.7455069E-01	19.50893	0.7905576E-02	0.3922998
08262011	08	0.005	0.034	0.034	0.000	0.003	0.002	0.008	0.010	0.089	0.002	0.060	298.890	0.833	0.5817550E-01	13.57314	0.7403361E-02	0.2632515
08262011	09	0.003	0.049	0.039	0.000	0.002	0.001	0.006	0.007	0.074	0.000	0.058	301.473	0.731	0.2551019E-02	6.193185	0.7391533E-02	-0.7682044E-01
08262011	10	0.001	0.053	0.039	0.000	0.002	0.001	0.003	0.005	0.061	0.000	0.056	303.751	0.649	0.2807975E-03	4.539655	0.4722779E-02	-0.1717473E-01
08262011	11	0.001	0.054	0.037	0.000	0.002	0.001	0.002	0.004	0.055	0.000	0.051	306.620	0.522	0.6484985E-04	2.651525	0.2760191E-02	-0.1744337E-01
08262011	12	0.001	0.056	0.028	0.000	0.001	0.000	0.002	0.003	0.047	0.000	0.041	308.414	0.468	0.2831221E-04	1.700338	0.2240056E-02	-0.1197238
08262011	13	0.001	0.022	0.018	0.000	0.001	0.000	0.002	0.003	0.037	0.000	0.032	307.938	0.473	0.2688169E-04	1.281374	0.2353150E-02	-0.2639739
08262011	14	0.001	0.005	0.012	0.000	0.001	0.000	0.001	0.002	0.027	0.000	0.024	306.552	0.517	0.2890825E-04	1.194477	0.1989400E-02	-0.2215443
08262011	15	0.002	0.001	0.009	0.000	0.001	0.000	0.001	0.002	0.021	0.000	0.018	305.697	0.536	0.4625320E-04	0.9241679	0.3024645E-02	-0.5149236
08262011	16	0.004	0.001	0.006	0.001	0.001	0.000	0.001	0.002	0.021	0.000	0.015	305.643	0.537	0.2461672E-04	1.078244	0.4098855E-02	-0.5799454
08262011	17	0.010	0.001	0.004	0.001	0.001	0.000	0.002	0.003	0.018	0.000	0.013	305.797	0.555	0.7342577E-02	0.7381059	0.1129691E-04	1.815159
08262011	18	0.014	0.002	0.004	0.003	0.001	0.001	0.002	0.004	0.019	0.000	0.015	305.230	0.597	0.8980274E-02	0.9846794	0.1244334E-04	1.898358
08262011	19	0.011	0.002	0.006	0.003	0.001	0.001	0.003	0.005	0.029	0.001	0.022	302.812	0.689	0.1555240E-01	1.955999	0.3928443E-04	1.697148
08262011	20	0.004	0.006	0.010	0.004	0.002	0.001	0.004	0.006	0.054	0.001	0.042	301.329	0.696	0.000000	4.064073	0.5638767E-02	-0.1422227
08262011	21	0.004	0.008	0.008	0.005	0.002	0.001	0.005	0.007	0.071	0.001	0.055	300.510	0.707	0.000000	5.472663	0.7043915E-02	-0.1096154
08262011	22	0.004	0.010	0.005	0.007	0.003	0.001	0.006	0.007	0.084	0.001	0.061	299.916	0.730	0.000000	6.768473	0.7086029E-02	-0.1991229E-01
08262011	23	0.003	0.015	0.005	0.007	0.003	0.001	0.006	0.006	0.097	0.001	0.072	299.477	0.748	0.000000	8.643806	0.9166748E-02	-0.2551024E-01
08262011	24	0.002	0.020	0.006	0.006	0.003	0.001	0.005	0.006	0.106	0.001	0.083	299.183	0.758	0.000000	10.22180	0.1099258E-01	-0.3157234E-01
08272011	01	0.002	0.017	0.005	0.006	0.003	0.001	0.005	0.005	0.108	0.001	0.086	298.951	0.764	0.000000	10.84794	0.1194864E-01	-0.4197121E-01
08272011	02	0.002	0.015	0.006	0.005	0.003	0.001	0.005	0.005	0.104	0.001	0.085	298.698	0.769	0.000000	11.27202	0.1156422E-01	-0.1111477E-01
08272011	03	0.002	0.013	0.006	0.005	0.003	0.001	0.004	0.005	0.100	0.001	0.081	298.285	0.781	0.000000	11.18047	0.1120110E-01	-0.8005876E-03
08272011	04	0.002	0.011	0.006	0.005	0.003	0.001	0.004	0.005	0.097	0.001	0.074	297.814	0.790	0.000000	10.59191	0.1019812E-01	0.1645391E-01
08272011	05	0.002	0.015	0.009	0.005	0.003	0.001	0.004	0.005	0.091	0.002	0.067	297.748	0.736	0.000000	7.766126	0.9544254E-02	-0.8953759E-01
08272011	06	0.003	0.023	0.013	0.004	0.003	0.001	0.004	0.005	0.083	0.002	0.058	296.969	0.752	0.000000	7.135468	0.7108580E-02	0.1639628E-02
08272011	07	0.003	0.026	0.014	0.003	0.003	0.001	0.004	0.005	0.079	0.002	0.054	296.146	0.776	0.000000	7.562126	0.5890177E-02	0.1085156
08272011	08	0.003	0.032	0.019	0.003	0.003	0.001	0.004	0.005	0.081	0.003	0.056	297.161	0.733	0.000000	6.405028	0.6640752E-02	-0.1569620E-01
08272011	09	0.003	0.049	0.029	0.002	0.003	0.001	0.004	0.006	0.086	0.004	0.061	299.126	0.666	0.000000	5.508256	0.8028218E-02	-0.1636050
08272011	10	0.001	0.103	0.042	0.002	0.003	0.001	0.004	0.006	0.091	0.003	0.072	301.466	0.584	0.000000	4.383482	0.1007990E-01	-0.3616369
08272011	11	0.001	0.143	0.056	0.001	0.002	0.001	0.003	0.006	0.091	0.003	0.084	303.831	0.483	0.000000	3.759329	0.2670384E-02	0.1485366
08272011	12	0.000	0.170	0.067	0.001	0.002	0.001	0.003	0.005	0.084	0.002	0.091	306.247	0.409	0.000000	3.265857	0.8781390E-03	0.5704339
08272011	13	0.000	0.179	0.059	0.001	0.002	0.001	0.002	0.005	0.077	0.001	0.086	308.220	0.354	0.000000	2.354215	0.4877093E-03	0.6836851
08272011	14	0.000	0.191	0.049	0.001	0.002	0.001	0.002	0.005	0.072	0.001	0.076	309.144	0.328	0.000000	1.895926	0.5817012E-03	0.5131215
08272011	15	0.001	0.192	0.041	0.001	0.001	0.001	0.002	0.004	0.069	0.001	0.065	308.860	0.326	0.000000	1.592155	0.1019718E-02	0.1935053
08272011	16	0.001	0.170	0.034	0.001	0.001	0.001	0.002	0.004	0.064	0.001	0.052	308.249	0.331	0.000000	1.234071	0.2424667E-02	-0.2933119
08272011	17	0.003	0.155	0.031	0.001	0.001	0.001	0.002	0.004	0.061	0.001	0.044	307.237	0.343	0.000000	1.284329	0.6510027E-02	-0.7049065
08272011	18	0.007	0.159	0.027	0.002	0.001	0.001	0.002	0.005	0.066	0.001	0.044	306.044	0.365	0.1657009E-04	1.708047	0.6779779E-02	-0.5987157
08272011	19	0.008	0.181	0.018	0.003	0.002	0.001	0.003	0.007	0.084	0.002	0.052	304.411	0.402	0.1133823E-01	2.167982	0.1174252E-03	1.266294
08272011	20	0.010	0.205	0.012	0.004	0.002	0.001	0.004	0.008	0.100	0.002	0.063	303.147	0.407	0.1773834E-03	3.496663	0.8029519E-02	-0.3610357
08272011	21	0.012	0.232	0.014	0.004	0.002	0.001	0.005	0.009	0.111	0.003	0.070	302.046	0.420	0.2389550E-03	4.094849	0.8112471E-02	-0.2969153
08272011	22	0.008	0.251	0.016	0.003	0.002	0.001	0.005	0.010	0.114	0.002	0.071	300.830	0.455	0.3138781E-03	4.506925	0.7542557E-02	-0.2236383
08272011	23	0.007	0.269	0.018	0.002	0.002	0.001	0.005	0.010	0.108	0.002	0.071	299.803	0.485	0.2546906E-03	4.047049	0.6439024E-02	-0.2016815
08272011	24	0.006	0.271	0.014	0.002	0.002	0.001	0.006	0.011	0.106	0.002	0.072	298.859	0.519	0.3731251E-03	4.119503	0.5666330E-02	-0.1384570
08282011	01	0.006	0.256	0.011	0.002	0.003	0.001	0.006	0.011	0.105	0.002	0.073	297.910	0.557	0.000000	4.657007	0.6131390E-02	-0.1194520
08282011	02	0.005	0.232	0.010	0.002	0.003	0.001	0.007	0.012	0.105	0.002	0.073	297.020	0.599	0.6603599E-03	5.201877	0.5351756E-02	-0.1233619E-01
08282011	03	0.005	0.213	0.010	0.001	0.003	0.002	0.007	0.012	0.106	0.002	0.074	296.452	0.619	0.9245872E-03	5.866763	0.5300305E-02	0.4409768E-01
08282011	04	0.005	0.218	0.015	0.001	0.003	0.002	0.008	0.013	0.107	0.002	0.075	295.748	0.648	0.8941293E-03	6.804048	0.5278054E-02	0.1102935
08282011	05	0.005	0.257	0.027	0.001	0.004	0.002	0.008	0.014	0.109	0.002	0.077	295.077	0.676	0.7041097E-03	7.835184	0.5216685E-02	0.1766546
08282011	06	0.005	0.288	0.035	0.000	0.004	0.002	0.008	0.014	0.112	0.002	0.081	294.275	0.711	0.4212821E-01	8.139757	0.5941964E-02	0.1366814
08282011	07	0.004	0.320	0.044	0.000	0.003	0.002	0.009	0.015	0.117	0.003	0.084	293.441	0.752	0.4653621E-01	9.642057	0.6213734E-02	0.1908170
08282011	08	0.004	0.338	0.047	0.000	0.003	0.002	0.009	0.015	0.120	0.003	0.087	294.353	0.737	0.3094614E-01	9.612146	0.6912366E-02	0.1431937
08282011	09	0.004	0.369	0.061	0.000	0.003	0.002	0.010	0.016	0.126	0.004	0.092	296.923	0.655	0.1608622E-01	7.655204	0.7680838E-02	-0.1451844E-02
08282011	10	0.005	0.361	0.055	0.000	0.003	0.002	0.010	0.016	0.127	0.003	0.093	300.047	0.556	0.8111238E-02	5.680416	0.8282000E-02	-0.1637551
08282011	11	0.004	0.384	0.085	0.000	0.003	0.002	0.011	0.017	0.135	0.002	0.103	303.369	0.451	0.9245872E-03	4.242926	0.1140547E-01	-0.4294477
08282011	12	0.003	0.387	0.112	0.000	0.003	0.002	0.011	0.018	0.141	0.001	0.110	305.405	0.396	0.3139377E-03	3.671989	0.1219079E-01	-0.5211303
08282011	13	0.004	0.302	0.093	0.000	0.003	0.002	0.011	0.017	0.131	0.001	0.102	307.465	0.349	0.2492666E-03	2.908799	0.1064309E-01	-0.5633540
08282011	14	0.004	0.243	0.077	0.000	0.003	0.002	0.010	0.015	0.118	0.001	0.093	308.646	0.324	0.1454353E-03	2.349910	0.9392777E-02	-0.6017427
08282011	15	0.005	0.187	0.061	0.000	0.002	0.001	0.008	0.013	0.099	0.001	0.077	308.538	0.320	0.1459718E-03	1.944693	0.8897560E-02	-0.6604199
08282011	16	0.007	0.159	0.053	0.000	0.002	0.001	0.007	0.012	0.091	0.001	0.069	307.887	0.326	0.5005002E-03	1.963145	0.8822800E-02	-0.6526541
08282011	17	0.008	0.153	0.049	0.000	0.002	0.001	0.007	0.011	0.090	0.001	0.066	306.878	0.336	0.2832353E-02	2.068465	0.8350055E-02	-0.6060413
08282011	18	0.009	0.158	0.039	0.000	0.002	0.001	0.007	0.012	0.095	0.001	0.066	305.583	0.363	0.9729266E-02	2.789935	0.8927956E-02	-0.5051579
08282011	19	0.012	0.149	0.020	0.001	0.002	0.001	0.008	0.012	0.098	0.001	0.067	303.370	0.421	0.1642704E-03	3.933411	0.8498784E-02	-0.3345875
08282011	20	0.011	0.133	0.013	0.002	0.002	0.002	0.008	0.013	0.104	0.002	0.071	302.626	0.374	0.2140999E-03	3.603431	0.8322633E-02	-0.3635446
08282011	21	0.009	0.129	0.010	0.003	0.003	0.002	0.008	0.014	0.125	0.002	0.082	301.113	0.432	0.5154014E-03	4.909652	0.8229685E-02	-0.2243325
08282011	22	0.008	0.120	0.009	0.003	0.003	0.002	0.009	0.014	0.146	0.002	0.096	299.698	0.499	0.8461475E-03	6.017653	0.7681534E-02	-0.1060208
08282011	23	0.008	0.108	0.009	0.003	0.003	0.002	0.009	0.015	0.155	0.002	0.101	299.334	0.507	0.1047790E-02	6.592219	0.7805889E-02	-0.7339075E-01
08282011	24	0.008	0.112	0.013	0.002	0.003	0.002	0.009	0.016	0.155	0.003	0.099	298.188	0.569	0.1408875E-02	8.554736	0.7743950E-02	0.4324407E-01
08292011	01	0.008	0.133	0.018	0.002	0.004	0.002	0.009	0.017	0.150	0.003	0.096	296.999	0.633	0.1644135E-02	10.61318	0.7467616E-02	0.1526635
08292011	02	0.007	0.158	0.024	0.001	0.004	0.002	0.009	0.017	0.144	0.003	0.093	295.857	0.690	0.1699984E-02	12.25503	0.6904771E-02	0.2491651
08292011	03	0.006	0.178	0.030	0.001	0.004	0.002	0.009	0.017	0.137	0.003	0.092	294.891	0.732	0.1338899E-02	12.36731	0.6131166E-02	0.3047323
08292011	04	0.005	0.186	0.031	0.001	0.004	0.002	0.008	0.016	0.129	0.003	0.091	294.117	0.764	0.9375215E-03	10.94140	0.5177150E-02	0.3249820
08292011	05	0.003	0.188	0.032	0.001	0.004	0.002	0.008	0.015	0.125	0.003	0.091	293.509	0.787	0.000000	12.32733	0.6753534E-02	0.2613378
08292011	06	0.003	0.190	0.034	0.001	0.004	0.002	0.008	0.015	0.122	0.003	0.091	292.938	0.808	0.000000	13.45082	0.7287019E-02	0.2661990
08292011	07	0.002	0.197	0.040	0.000	0.004	0.002	0.008	0.015	0.121	0.004	0.092	292.425	0.829	0.2874142E-01	15.00118	0.9105376E-02	0.2168276
08292011	08	0.002	0.198	0.043	0.000	0.004	0.002	0.008	0.014	0.118	0.003	0.092	293.581	0.785	0.1341850E-01	12.34615	0.1039078E-01	0.7488311E-01
08292011	09	0.001	0.214	0.054	0.000	0.003	0.002	0.006	0.011	0.110	0.002	0.089	296.340	0.673	0.1536608E-02	7.365302	0.1514161E-01	-0.3129815
08292011	10	0.001	0.225	0.058	0.000	0.003	0.002	0.006	0.011	0.109	0.002	0.090	299.575	0.549	0.3136396E-03	4.778357	0.1754639E-01	-0.5649093
08292011	11	0.001	0.311	0.069	0.000	0.003	0.001	0.005	0.010	0.102	0.002	0.097	303.275	0.417	0.4082918E-04	3.312097	0.2389540E-02	0.1417887
08292011	12	0.000	0.300	0.076	0.000	0.002	0.001	0.004	0.008	0.092	0.001	0.102	305.459	0.347	0.4053116E-05	2.725119	0.5283589E-03	0.7124565
08292011	13	0.000	0.221	0.073	0.000	0.002	0.001	0.004	0.007	0.084	0.001	0.097	307.615	0.293	0.8344650E-06	1.934021	0.2617432E-03	0.8685858
08292011	14	0.000	0.162	0.068	0.000	0.002	0.001	0.004	0.007	0.078	0.001	0.089	308.932	0.262	0.6556511E-06	1.459979	0.2140409E-03	0.8338498
08292011	15	0.000	0.108	0.058	0.000	0.001	0.001	0.004	0.007	0.075	0.001	0.074	308.870	0.257	0.2801418E-05	1.177870	0.6207852E-03	0.2781559
08292011	16	0.001	0.079	0.048	0.000	0.001	0.001	0.004	0.006	0.077	0.001	0.061	308.317	0.262	0.5424023E-05	0.9849983	0.2674891E-02	-0.4338707
08292011	17	0.005	0.070	0.042	0.000	0.001	0.001	0.004	0.006	0.079	0.001	0.056	307.368	0.271	0.5799532E-04	1.251164	0.9005983E-02	-0.8572168
08292011	18	0.008	0.065	0.030	0.000	0.001	0.001	0.004	0.007	0.081	0.001	0.053	305.983	0.310	0.7183492E-02	1.860873	0.8015010E-02	-0.6341872
08292011	19	0.010	0.058	0.015	0.001	0.001	0.001	0.004	0.007	0.083	0.001	0.053	303.474	0.352	0.9399652E-04	2.484239	0.7529186E-02	-0.4815546
08292011	20	0.013	0.056	0.009	0.002	0.002	0.001	0.005	0.008	0.081	0.001	0.053	301.795	0.362	0.1669490E-01	1.867419	0.1030921E-03	1.258016
08292011	21	0.016	0.065	0.008	0.003	0.002	0.001	0.006	0.008	0.081	0.001	0.054	300.772	0.374	0.1953781E-01	1.956926	0.1142503E-03	1.233717
08292011	22	0.021	0.075	0.007	0.004	0.002	0.001	0.006	0.010	0.085	0.002	0.058	299.782	0.411	0.2420819E-01	2.326714	0.1453815E-03	1.204234
08292011	23	0.024	0.083	0.007	0.004	0.003	0.002	0.007	0.012	0.088	0.002	0.062	298.782	0.457	0.3177452E-01	2.873938	0.1872525E-03	1.186050
08292011	24	0.021	0.088	0.008	0.004	0.003	0.002	0.007	0.013	0.092	0.002	0.065	297.727	0.512	0.3581852E-01	3.458038	0.2226444E-03	1.191218
08302011	01	0.009	0.086	0.007	0.003	0.003	0.002	0.007	0.013	0.100	0.002	0.067	296.581	0.577	0.1482844E-02	6.828637	0.6183254E-02	0.4311698E-01
08302011	02	0.006	0.083	0.007	0.003	0.003	0.002	0.007	0.013	0.105	0.002	0.070	295.613	0.628	0.1627326E-02	7.449773	0.5704175E-02	0.1159502
08302011	03	0.006	0.087	0.008	0.002	0.003	0.002	0.007	0.013	0.106	0.002	0.071	295.014	0.646	0.1902640E-02	7.815816	0.5493838E-02	0.1530985
08302011	04	0.005	0.094	0.007	0.002	0.003	0.002	0.007	0.013	0.106	0.002	0.073	294.501	0.654	0.1731873E-02	7.020588	0.5018206E-02	0.1458250
08302011	05	0.005	0.100	0.007	0.002	0.004	0.002	0.007	0.013	0.106	0.002	0.073	294.120	0.655	0.1980424E-02	7.468656	0.4978985E-02	0.1761017
08302011	06	0.005	0.107	0.007	0.002	0.004	0.002	0.007	0.014	0.105	0.002	0.072	293.683	0.664	0.2352536E-02	7.878913	0.5007088E-02	0.1968811
08302011	07	0.005	0.111	0.008	0.002	0.004	0.002	0.008	0.014	0.104	0.002	0.071	293.363	0.680	0.2525032E-02	8.709500	0.5024706E-02	0.2388826
08302011	08	0.005	0.106	0.015	0.001	0.004	0.002	0.008	0.015	0.101	0.002	0.070	295.156	0.671	0.1409352E-02	8.431806	0.5560555E-02	0.1808024
08302011	09	0.006	0.148	0.033	0.001	0.005	0.002	0.008	0.015	0.094	0.002	0.067	298.174	0.587	0.3786683E-03	6.546140	0.6420903E-02	0.8389204E-02
08302011	10	0.003	0.281	0.056	0.000	0.005	0.002	0.006	0.012	0.079	0.002	0.064	301.113	0.477	0.1340747E-02	3.007306	0.7338488E-02	-0.3874289
08302011	11	0.001	0.304	0.059	0.000	0.003	0.001	0.004	0.008	0.069	0.001	0.065	303.664	0.394	0.2634525E-04	1.938944	0.2390807E-02	-0.9097946E-01
08302011	12	0.001	0.240	0.052	0.000	0.002	0.001	0.003	0.006	0.078	0.001	0.066	305.828	0.332	0.1472235E-04	1.547650	0.2442441E-02	-0.1981514
08302011	13	0.001	0.190	0.048	0.000	0.002	0.001	0.003	0.006	0.083	0.001	0.067	307.784	0.291	0.1102686E-04	1.289693	0.2760286E-02	-0.3304675
08302011	14	0.001	0.177	0.046	0.000	0.001	0.001	0.003	0.005	0.079	0.001	0.069	308.913	0.270	0.5424023E-05	1.198241	0.1274841E-02	-0.2691180E-01
08302011	15	0.000	0.164	0.044	0.000	0.001	0.001	0.003	0.005	0.073	0.001	0.070	308.927	0.267	0.3039837E-05	1.222770	0.6409036E-03	0.2805520
08302011	16	0.000	0.158	0.043	0.000	0.001	0.001	0.003	0.005	0.070	0.000	0.071	308.477	0.271	0.2086163E-05	1.244061	0.4255104E-03	0.4659315
08302011	17	0.000	0.156	0.041	0.000	0.001	0.001	0.003	0.005	0.070	0.000	0.071	307.594	0.282	0.2503395E-05	1.320219	0.4402660E-03	0.4769308
08302011	18	0.001	0.138	0.031	0.000	0.001	0.001	0.003	0.005	0.075	0.000	0.071	305.892	0.295	0.5424023E-05	1.465717	0.7961732E-03	0.2650425
08302011	19	0.001	0.102	0.020	0.000	0.001	0.001	0.004	0.006	0.086	0.000	0.069	304.102	0.342	0.1889467E-04	1.649443	0.3795065E-02	-0.3618819
08302011	20	0.002	0.094	0.021	0.000	0.001	0.001	0.004	0.007	0.090	0.000	0.068	302.552	0.328	0.3802776E-04	1.670560	0.2140226E-01	-1.107598
08302011	21	0.003	0.098	0.023	0.000	0.001	0.001	0.005	0.008	0.092	0.000	0.069	301.277	0.349	0.9149313E-04	1.910823	0.1659938E-01	-0.9388711
08302011	22	0.003	0.109	0.022	0.000	0.002	0.001	0.005	0.009	0.097	0.000	0.072	300.258	0.389	0.2218485E-03	2.400292	0.1467028E-01	-0.7861744
08302011	23	0.003	0.125	0.019	0.001	0.002	0.002	0.006	0.010	0.102	0.001	0.076	299.412	0.434	0.000000	3.011302	0.1226975E-01	-0.6100815
08302011	24	0.002	0.143	0.016	0.001	0.002	0.002	0.006	0.011	0.107	0.001	0.080	298.793	0.481	0.000000	3.668307	0.1333632E-01	-0.5605703
