# Supplementary material for: Understanding nitrate formation in a world with less sulfate
Source: Copernicus journal article supplement (doi:10.5194/acp-18-12765-2018), 2018-09-05
Supplement: Supplementary file 2 [file acp-18-12765-2018-supplement.zip › DATA/RAW DATA FOR DIURNALS/data_extract_SOAS_aug_mod2011.csv]

Date	Hour	NH3	SO2	HNO3	CL	NA	MG	K	CA	NH4	NO3	SO4	T	RH	e_NO3	Water	H+	pH
08022011	01	0.002	0.003	0.005	0.000	0.001	0.000	0.001	0.000	0.021	0.000	0.013	299.510	0.849	0.1158476E-01	2.884167	0.2965885E-02	-0.1213375E-01
08022011	02	0.002	0.003	0.005	0.001	0.001	0.000	0.001	0.000	0.022	0.000	0.013	299.029	0.884	0.3521663E-01	3.579540	0.5656754E-04	1.801260
08022011	03	0.003	0.003	0.004	0.001	0.001	0.000	0.001	0.001	0.022	0.000	0.013	298.680	0.902	0.4266715E-01	3.930111	0.5395474E-04	1.862375
08022011	04	0.004	0.002	0.004	0.001	0.001	0.000	0.001	0.001	0.022	0.000	0.013	298.376	0.912	0.4588729E-01	4.357800	0.5596095E-04	1.891382
08022011	05	0.006	0.002	0.003	0.001	0.001	0.000	0.002	0.001	0.021	0.000	0.013	298.099	0.921	0.5581909E-01	4.882288	0.4952590E-04	1.993791
08022011	06	0.007	0.002	0.003	0.001	0.001	0.000	0.002	0.001	0.021	0.000	0.013	297.865	0.929	0.6227565E-01	5.591734	0.5386849E-04	2.016212
08022011	07	0.010	0.003	0.003	0.001	0.002	0.000	0.002	0.001	0.020	0.000	0.013	298.237	0.937	0.6862366E-01	6.545688	0.5766954E-04	2.055009
08022011	08	0.010	0.003	0.005	0.001	0.002	0.000	0.002	0.001	0.019	0.000	0.012	300.209	0.888	0.2929926E-01	3.287310	0.4202023E-04	1.893382
08022011	09	0.008	0.009	0.006	0.000	0.002	0.000	0.002	0.001	0.016	0.000	0.011	301.818	0.830	-99999.00	2.514066	0.6412397E-03	0.5933564
08022011	10	0.005	0.016	0.009	0.000	0.002	0.000	0.001	0.001	0.015	0.000	0.010	303.450	0.761	-99999.00	1.633944	0.2783077E-02	-0.2312882
08022011	11	0.002	0.015	0.011	0.000	0.001	0.000	0.001	0.000	0.014	0.000	0.009	305.134	0.687	-99999.00	1.018681	0.8939982E-02	-0.9432983
08022011	12	0.002	0.013	0.013	0.000	0.001	0.000	0.001	0.000	0.011	0.000	0.009	306.476	0.633	0.1077056E-03	0.7471915	0.2533598E-02	-0.5303057
08022011	13	0.001	0.015	0.014	0.000	0.001	0.000	0.001	0.000	0.010	0.000	0.009	307.849	0.580	0.2747774E-04	0.6090142	0.1625859E-02	-0.4264556
08022011	14	0.001	0.017	0.014	0.000	0.001	0.000	0.000	0.000	0.010	0.000	0.009	308.749	0.543	0.000000	0.5502782	0.1291059E-02	-0.3703639
08022011	15	0.001	0.020	0.015	0.000	0.001	0.000	0.000	0.000	0.011	0.000	0.009	309.024	0.525	0.000000	0.5205681	0.1686218E-02	-0.5104363
08022011	16	0.001	0.021	0.016	0.000	0.001	0.000	0.000	0.000	0.012	0.000	0.010	308.665	0.532	0.000000	0.5800211	0.1583759E-02	-0.4362453
08022011	17	0.001	0.018	0.014	0.000	0.000	0.000	0.000	0.001	0.013	0.000	0.010	308.190	0.541	0.2396107E-04	0.5200784	0.2211704E-02	-0.6286583
08022011	18	0.001	0.018	0.014	0.000	0.000	0.000	0.001	0.001	0.014	0.000	0.012	307.871	0.545	0.2503395E-04	0.6335028	0.1770647E-02	-0.4463834
08022011	19	0.001	0.013	0.013	0.000	0.000	0.000	0.001	0.001	0.014	0.000	0.014	306.693	0.557	0.1746416E-04	0.8150113	0.1100159E-02	-0.1302917
08022011	20	0.001	0.003	0.010	0.000	0.000	0.000	0.001	0.001	0.013	0.000	0.014	304.777	0.612	0.2175570E-04	0.9973124	0.1076245E-02	-0.3308007E-01
08022011	21	0.001	0.001	0.007	0.000	0.000	0.000	0.001	0.000	0.013	0.000	0.011	303.458	0.668	0.7188320E-04	1.019267	0.1754827E-02	-0.2359463
08022011	22	0.002	0.000	0.004	0.000	0.000	0.000	0.000	0.000	0.011	0.000	0.008	302.445	0.720	0.2086163E-03	0.9119395	0.8410082E-03	0.3516581E-01
08022011	23	0.002	0.000	0.003	0.000	0.000	0.000	0.000	0.000	0.009	0.000	0.006	301.521	0.777	0.1029670E-02	0.9152998	0.3290447E-03	0.4443085
08022011	24	0.002	0.000	0.002	0.000	0.000	0.000	0.000	0.000	0.009	0.000	0.005	300.805	0.834	0.2715588E-03	0.9960159	0.6973139E-03	0.1548379
08032011	01	0.003	0.000	0.001	0.000	0.000	0.000	0.000	0.000	0.006	0.000	0.003	300.200	0.891	0.5120635E-03	0.8982036	0.2247501E-03	0.6016749
08032011	02	0.002	0.000	0.001	0.000	0.000	0.000	0.000	0.000	0.005	0.000	0.003	299.835	0.912	0.4190207E-03	1.090909	0.3762528E-03	0.4623088
08032011	03	0.002	0.000	0.001	0.000	0.000	0.000	0.000	0.000	0.004	0.000	0.002	299.562	0.926	0.5475879E-03	0.9345794	0.1762987E-03	0.7243671
08032011	04	0.002	0.000	0.001	0.000	0.000	0.000	0.000	0.000	0.003	0.000	0.002	299.290	0.948	0.7093549E-03	1.324503	0.2367880E-03	0.7476934
08032011	05	0.003	0.000	0.000	0.000	0.000	0.000	0.000	0.000	0.003	0.000	0.002	299.175	0.941	-99999.00	1.092896	0.2867873E-03	0.5810189
08032011	06	0.003	0.000	0.000	0.000	0.000	0.000	0.000	0.000	0.003	0.000	0.002	298.975	0.927	-99999.00	0.9345794	0.2645951E-03	0.5480343
08032011	07	0.004	0.000	0.001	0.000	0.000	0.000	0.000	0.000	0.003	0.000	0.002	299.313	0.913	0.5213022E-03	0.7272727	0.1378419E-03	0.7223160
08032011	08	0.003	0.000	0.001	0.000	0.000	0.000	0.000	0.000	0.004	0.000	0.003	300.887	0.881	0.2207756E-03	0.8264462	0.4474382E-03	0.2664815
08032011	09	0.001	0.000	0.002	0.000	0.000	0.000	0.000	0.000	0.007	0.000	0.004	302.589	0.834	0.1551509E-03	0.7968128	0.7043309E-03	0.5357954E-01
08032011	10	0.002	0.001	0.003	0.000	0.000	0.000	0.000	0.000	0.010	0.000	0.005	304.381	0.759	0.1031160E-03	0.7235890	0.7489627E-03	-0.1496830E-01
08032011	11	0.003	0.004	0.004	0.000	0.001	0.000	0.000	0.000	0.011	0.000	0.007	306.435	0.651	0.4988909E-04	0.7138739	0.1373842E-02	-0.2843152
08032011	12	0.004	0.009	0.005	0.000	0.000	0.000	0.000	0.000	0.012	0.000	0.007	307.588	0.594	0.3176928E-04	0.5828477	0.1337510E-02	-0.3607419
08032011	13	0.005	0.009	0.006	0.000	0.000	0.000	0.000	0.000	0.012	0.000	0.007	308.644	0.558	0.2586842E-04	0.5347593	0.1218656E-02	-0.3577226
08032011	14	0.005	0.010	0.006	0.000	0.000	0.000	0.000	0.000	0.012	0.000	0.007	309.182	0.540	0.2050400E-04	0.5050505	0.1270556E-02	-0.4006590
08032011	15	0.006	0.009	0.005	0.000	0.000	0.000	0.000	0.000	0.012	0.000	0.007	308.986	0.538	0.2533197E-04	0.5050505	0.1080766E-02	-0.3303970
08032011	16	0.006	0.007	0.004	0.000	0.000	0.000	0.000	0.000	0.012	0.000	0.007	308.668	0.536	0.2717972E-04	0.5050505	0.1064567E-02	-0.3238382
08032011	17	0.007	0.008	0.004	0.000	0.000	0.000	0.000	0.000	0.011	0.000	0.006	307.926	0.540	0.3606081E-04	0.4329005	0.6856671E-03	-0.1997253
08032011	18	0.008	0.008	0.003	0.001	0.001	0.000	0.001	0.000	0.011	0.000	0.006	306.856	0.571	0.4965067E-02	0.4681496	0.5608124E-05	1.921567
08032011	19	0.009	0.005	0.002	0.001	0.001	0.000	0.001	0.000	0.011	0.000	0.006	305.441	0.664	0.8189261E-02	0.6162958	0.6208989E-05	1.996768
08032011	20	0.010	0.003	0.002	0.001	0.001	0.000	0.001	0.000	0.010	0.000	0.006	303.787	0.683	0.9496927E-02	0.6579439	0.7672955E-05	1.933226
08032011	21	0.006	0.002	0.001	0.001	0.001	0.000	0.001	0.000	0.009	0.000	0.005	303.133	0.686	0.1122463E-01	0.5672140	0.5038583E-05	2.051439
08032011	22	0.003	0.001	0.001	0.001	0.001	0.000	0.001	0.000	0.008	0.000	0.005	302.415	0.718	0.1261920E-01	0.6288019	0.5648787E-05	2.046559
08032011	23	0.002	0.001	0.001	0.001	0.001	0.000	0.001	0.000	0.007	0.000	0.005	301.912	0.752	0.1405382E-01	0.7017478	0.6183858E-05	2.054922
08032011	24	0.002	0.000	0.000	0.001	0.001	0.000	0.001	0.000	0.007	0.000	0.005	301.385	0.793	-99999.00	0.8248101	0.3324686E-05	2.394603
08042011	01	0.002	0.001	0.000	0.001	0.002	0.000	0.001	0.000	0.006	0.000	0.005	300.819	0.838	-99999.00	1.070654	0.4077308E-05	2.419276
08042011	02	0.002	0.001	0.001	0.001	0.002	0.000	0.001	0.000	0.006	0.000	0.005	300.280	0.870	0.2321649E-01	1.288928	0.9143202E-05	2.149130
08042011	03	0.003	0.002	0.001	0.001	0.003	0.000	0.001	0.000	0.006	0.000	0.005	299.980	0.870	0.2347302E-01	1.299939	0.9568989E-05	2.133057
08042011	04	0.004	0.003	0.001	0.001	0.004	0.000	0.001	0.000	0.006	0.000	0.006	299.643	0.863	0.2745491E-01	1.468015	0.1185671E-04	2.092766
08042011	05	0.004	0.004	0.001	0.001	0.005	0.000	0.001	0.001	0.006	0.000	0.006	299.436	0.861	0.2287978E-01	1.241254	0.1017875E-04	2.086166
08042011	06	0.004	0.006	0.001	0.001	0.005	0.000	0.001	0.001	0.007	0.000	0.008	299.161	0.854	0.3155094E-01	1.618698	0.1443096E-04	2.049870
08042011	07	0.005	0.008	0.002	0.001	0.006	0.000	0.001	0.001	0.009	0.000	0.009	299.262	0.847	0.2722389E-01	1.855243	0.2200093E-04	1.925960
08042011	08	0.004	0.016	0.005	0.001	0.005	0.000	0.001	0.001	0.011	0.000	0.010	300.590	0.809	0.1634377E-01	1.683461	0.3126471E-04	1.731148
08042011	09	0.003	0.034	0.013	0.001	0.004	0.000	0.001	0.001	0.014	0.000	0.011	301.925	0.773	0.9401023E-02	1.560924	0.4607452E-04	1.529921
08042011	10	0.003	0.033	0.015	0.000	0.002	0.000	0.001	0.001	0.012	0.000	0.008	303.170	0.738	-99999.00	1.228677	0.9121275E-02	-0.8706177
08042011	11	0.006	0.025	0.012	0.000	0.001	0.000	0.000	0.001	0.011	0.000	0.007	304.426	0.702	-99999.00	1.035099	0.4579469E-02	-0.6458333
08042011	12	0.008	0.017	0.010	0.000	0.001	0.000	0.000	0.001	0.010	0.000	0.006	305.412	0.676	-99999.00	0.9584944	0.1168269E-02	-0.8595324E-01
08042011	13	0.008	0.013	0.010	0.000	0.001	0.000	0.000	0.001	0.010	0.000	0.006	306.128	0.655	-99999.00	0.8889558	0.1169935E-02	-0.1192817
08042011	14	0.009	0.011	0.010	0.000	0.001	0.000	0.000	0.001	0.009	0.000	0.006	306.103	0.656	-99999.00	0.8890589	0.1169498E-02	-0.1190691
08042011	15	0.010	0.011	0.012	0.000	0.001	0.000	0.001	0.001	0.009	0.000	0.006	305.629	0.666	-99999.00	1.008039	0.1033576E-02	-0.1086511E-01
08042011	16	0.011	0.014	0.016	0.000	0.001	0.000	0.001	0.002	0.009	0.000	0.007	304.953	0.681	-99999.00	1.139007	0.2715964E-02	-0.3773977
08042011	17	0.011	0.019	0.018	0.000	0.001	0.000	0.001	0.002	0.009	0.000	0.008	303.997	0.700	-99999.00	1.254900	0.6069668E-02	-0.6845556
08042011	18	0.010	0.028	0.018	0.000	0.001	0.000	0.001	0.003	0.009	0.000	0.009	302.844	0.723	-99999.00	1.304271	0.7082052E-02	-0.7347914
08042011	19	0.009	0.045	0.017	0.000	0.001	0.000	0.001	0.003	0.010	0.000	0.010	301.567	0.751	-99999.00	1.480207	0.7920241E-02	-0.7284158
08042011	20	0.007	0.060	0.014	0.001	0.002	0.001	0.002	0.004	0.011	0.000	0.012	300.670	0.766	0.7517755E-02	1.268616	0.3036323E-04	1.620982
08042011	21	0.006	0.069	0.010	0.001	0.002	0.001	0.002	0.005	0.012	0.000	0.013	300.100	0.782	0.9415567E-02	1.317294	0.2773352E-04	1.676677
08042011	22	0.007	0.071	0.010	0.001	0.002	0.001	0.002	0.006	0.011	0.001	0.014	299.657	0.807	0.1014119E-01	1.490310	0.3205664E-04	1.667359
08042011	23	0.009	0.067	0.009	0.001	0.002	0.001	0.003	0.007	0.009	0.001	0.014	299.449	0.823	0.9418011E-02	1.360160	0.2362484E-04	1.760221
08042011	24	0.011	0.064	0.009	0.001	0.003	0.001	0.003	0.008	0.006	0.001	0.015	299.257	0.839	0.1026243E-01	1.516443	0.2600294E-04	1.765803
08052011	01	0.011	0.063	0.009	0.001	0.003	0.001	0.004	0.009	0.005	0.001	0.015	299.070	0.853	0.9420395E-02	1.365362	0.1800722E-04	1.879801
08052011	02	0.007	0.065	0.008	0.001	0.003	0.002	0.004	0.009	0.008	0.001	0.016	298.858	0.867	0.1721513E-01	1.825546	0.1691331E-04	2.033164
08052011	03	0.004	0.073	0.007	0.001	0.003	0.002	0.004	0.009	0.012	0.001	0.017	298.655	0.877	0.2012849E-03	8.271552	0.3972008E-02	0.3185769
08052011	04	0.006	0.096	0.009	0.001	0.004	0.002	0.004	0.009	0.013	0.001	0.018	298.452	0.886	0.2037090E-01	2.700822	0.3538985E-04	1.882617
08052011	05	0.006	0.109	0.008	0.001	0.004	0.002	0.004	0.010	0.016	0.001	0.020	298.248	0.894	0.2090597E-01	2.989063	0.4490852E-04	1.823206
08052011	06	0.008	0.121	0.008	0.001	0.004	0.002	0.004	0.010	0.016	0.001	0.021	298.058	0.901	0.2477020E-01	3.576646	0.5399710E-04	1.821105
08052011	07	0.013	0.126	0.007	0.001	0.004	0.002	0.005	0.010	0.013	0.001	0.022	298.359	0.908	0.3094751E-01	4.288558	0.5754727E-04	1.872287
08052011	08	0.009	0.148	0.010	0.000	0.004	0.002	0.005	0.010	0.020	0.001	0.024	299.828	0.857	-99999.00	4.888761	0.4200450E-03	1.065903
08052011	09	0.010	0.248	0.030	0.000	0.004	0.001	0.003	0.007	0.031	0.001	0.026	301.269	0.799	-99999.00	4.494728	0.1270768E-01	-0.4513629
08052011	10	0.012	0.227	0.035	0.000	0.003	0.001	0.002	0.005	0.033	0.001	0.024	302.866	0.729	-99999.00	3.447908	0.1619504E-01	-0.6718265
08052011	11	0.009	0.188	0.036	0.000	0.002	0.001	0.002	0.004	0.033	0.000	0.022	304.108	0.684	-99999.00	2.640087	0.1887430E-01	-0.8542525
08052011	12	0.006	0.148	0.032	0.000	0.001	0.000	0.001	0.003	0.030	0.000	0.019	305.296	0.641	-99999.00	1.791186	0.2280725E-01	-1.104932
08052011	13	0.004	0.110	0.027	0.000	0.001	0.000	0.001	0.002	0.027	0.000	0.017	306.382	0.603	-99999.00	1.383649	0.2141435E-01	-1.189679
08052011	14	0.004	0.094	0.024	0.000	0.001	0.000	0.001	0.002	0.026	0.000	0.016	306.868	0.583	-99999.00	1.252313	0.1737275E-01	-1.142156
08052011	15	0.004	0.077	0.021	0.000	0.001	0.000	0.001	0.002	0.025	0.000	0.015	306.657	0.580	-99999.00	1.201731	0.1339142E-01	-1.047019
08052011	16	0.004	0.060	0.019	0.000	0.001	0.000	0.001	0.002	0.023	0.000	0.015	306.036	0.591	-99999.00	1.172651	0.1366437E-01	-1.066421
08052011	17	0.005	0.049	0.017	0.000	0.001	0.000	0.001	0.002	0.022	0.000	0.014	305.036	0.611	-99999.00	1.230013	0.9682270E-02	-0.8960674
08052011	18	0.005	0.043	0.013	0.000	0.001	0.000	0.001	0.002	0.022	0.000	0.014	303.780	0.638	-99999.00	1.344362	0.6050657E-02	-0.6532865
08052011	19	0.005	0.040	0.011	0.001	0.001	0.000	0.001	0.003	0.021	0.000	0.015	302.379	0.684	0.9362221E-02	1.313682	0.4303540E-04	1.484664
08052011	20	0.006	0.039	0.008	0.001	0.001	0.001	0.001	0.003	0.021	0.000	0.015	301.387	0.689	0.1193517E-01	1.421406	0.3532245E-04	1.604667
08052011	21	0.005	0.045	0.008	0.001	0.001	0.001	0.002	0.004	0.021	0.000	0.017	300.648	0.710	0.1280904E-03	2.827189	0.3991567E-02	-0.1497886
08052011	22	0.004	0.046	0.007	0.001	0.001	0.001	0.002	0.005	0.023	0.000	0.018	299.971	0.738	0.1666957E-01	1.796254	0.4155798E-04	1.635713
08052011	23	0.004	0.042	0.007	0.001	0.001	0.001	0.003	0.006	0.023	0.000	0.019	299.527	0.756	0.1775557E-01	1.919504	0.4157044E-04	1.664404
08052011	24	0.007	0.041	0.007	0.001	0.001	0.001	0.003	0.006	0.022	0.001	0.020	299.065	0.780	0.2610087E-03	4.430065	0.4118547E-02	0.3166599E-01
08062011	01	0.009	0.042	0.007	0.001	0.002	0.001	0.004	0.007	0.019	0.001	0.020	298.582	0.810	0.2072638E-01	2.367962	0.5242180E-04	1.654863
08062011	02	0.008	0.041	0.006	0.001	0.002	0.001	0.004	0.008	0.019	0.001	0.020	298.222	0.830	0.2181667E-01	2.411247	0.4587758E-04	1.720641
08062011	03	0.006	0.039	0.006	0.001	0.002	0.002	0.004	0.009	0.020	0.001	0.020	298.018	0.840	0.2045029E-01	2.368371	0.3683958E-04	1.808135
08062011	04	0.006	0.037	0.005	0.001	0.002	0.002	0.004	0.009	0.018	0.001	0.021	297.911	0.844	0.3864169E-03	6.798751	0.4082227E-02	0.2215320
08062011	05	0.010	0.035	0.004	0.001	0.002	0.002	0.005	0.010	0.015	0.001	0.021	297.870	0.845	0.2483970E-01	2.486860	0.3084140E-04	1.906517
08062011	06	0.013	0.034	0.004	0.001	0.003	0.002	0.005	0.010	0.012	0.001	0.021	297.870	0.846	0.2478504E-01	2.499692	0.3126061E-04	1.902889
08062011	07	0.014	0.031	0.004	0.001	0.003	0.002	0.005	0.010	0.011	0.001	0.021	298.301	0.858	0.2561176E-01	2.650746	0.3170975E-04	1.922175
08062011	08	0.012	0.027	0.004	0.001	0.003	0.002	0.005	0.010	0.012	0.001	0.021	300.442	0.805	0.1854587E-01	2.055411	0.2148944E-04	1.980674
08062011	09	0.010	0.056	0.026	0.000	0.003	0.001	0.003	0.006	0.019	0.001	0.020	302.128	0.743	-99999.00	2.563692	0.1357750E-01	-0.7239539
08062011	10	0.006	0.080	0.039	0.000	0.002	0.001	0.002	0.004	0.024	0.001	0.018	303.925	0.680	-99999.00	2.005553	0.2884011E-01	-1.157763
08062011	11	0.003	0.082	0.039	0.000	0.002	0.001	0.002	0.003	0.023	0.000	0.019	305.522	0.626	0.4944026E-02	1.562245	0.4086404E-02	-0.4175921
08062011	12	0.002	0.048	0.032	0.000	0.001	0.000	0.001	0.002	0.022	0.000	0.020	306.442	0.596	0.6347895E-04	1.289859	0.2652952E-02	-0.3131872
08062011	13	0.001	0.010	0.021	0.000	0.001	0.000	0.001	0.002	0.017	0.000	0.019	306.467	0.581	0.2169609E-04	1.193256	0.1268039E-02	-0.2639886E-01
08062011	14	0.001	0.001	0.011	0.000	0.000	0.000	0.001	0.001	0.015	0.000	0.015	306.563	0.588	0.2354383E-04	0.9856350	0.1250322E-02	-0.1033059
08062011	15	0.001	0.000	0.007	0.000	0.000	0.000	0.000	0.001	0.012	0.000	0.012	306.039	0.613	0.1829863E-04	0.8467605	0.1162142E-02	-0.1374987
08062011	16	0.001	0.000	0.005	0.000	0.000	0.000	0.000	0.001	0.010	0.000	0.009	305.683	0.635	0.3319979E-04	0.6625886	0.1560554E-02	-0.3720349
08062011	17	0.001	0.000	0.004	0.000	0.000	0.000	0.000	0.001	0.008	0.000	0.007	305.036	0.668	0.4768372E-04	0.5434783	0.1710958E-02	-0.4980572
08062011	18	0.001	0.000	0.002	0.000	0.000	0.000	0.000	0.000	0.007	0.000	0.005	304.007	0.717	0.1080632E-03	0.5663450	0.4702032E-03	0.8079550E-01
08062011	19	0.002	0.000	0.002	0.000	0.000	0.000	0.000	0.000	0.007	0.000	0.005	302.576	0.770	0.5764365E-03	0.7265325	0.3071443E-03	0.3739126
08062011	20	0.002	0.000	0.002	0.000	0.000	0.000	0.000	0.000	0.007	0.000	0.004	301.158	0.852	0.2235174E-03	0.8948547	0.5911212E-03	0.1800760
08062011	21	0.003	0.000	0.002	0.000	0.000	0.000	0.000	0.001	0.009	0.000	0.005	300.372	0.886	-99999.00	1.407255	0.3696939E-03	0.5805306
08062011	22	0.003	0.000	0.003	0.000	0.000	0.000	0.001	0.001	0.012	0.000	0.007	299.908	0.889	-99999.00	2.091305	0.5507404E-03	0.5794705
08062011	23	0.004	0.001	0.003	0.001	0.000	0.000	0.001	0.002	0.014	0.000	0.009	299.548	0.893	0.2470446E-01	2.084229	0.2272361E-04	1.962468
08062011	24	0.004	0.001	0.003	0.001	0.001	0.000	0.001	0.002	0.016	0.000	0.011	299.275	0.893	0.3210425E-01	2.691559	0.3067474E-04	1.943223
08072011	01	0.004	0.001	0.003	0.001	0.001	0.000	0.001	0.002	0.017	0.000	0.012	298.987	0.899	0.4039317E-01	3.274373	0.3925895E-04	1.921190
08072011	02	0.004	0.002	0.004	0.001	0.001	0.001	0.002	0.003	0.019	0.000	0.014	298.762	0.903	0.3790873E-01	3.584888	0.4322191E-04	1.918772
08072011	03	0.004	0.003	0.003	0.001	0.001	0.001	0.002	0.003	0.019	0.000	0.014	298.544	0.918	0.5009776E-01	4.434965	0.4222127E-04	2.021359
08072011	04	0.004	0.003	0.003	0.001	0.001	0.001	0.002	0.004	0.019	0.000	0.015	298.518	0.912	0.4615581E-01	3.962408	0.3982337E-04	1.997821
08072011	05	0.006	0.003	0.002	0.001	0.001	0.001	0.002	0.004	0.018	0.000	0.014	298.476	0.912	0.4936463E-01	3.598771	0.2997627E-04	2.079377
08072011	06	0.007	0.002	0.002	0.001	0.001	0.001	0.002	0.004	0.017	0.000	0.014	298.297	0.934	0.5880409E-01	4.591471	0.3437661E-04	2.125689
08072011	07	0.008	0.002	0.002	0.001	0.002	0.001	0.002	0.004	0.016	0.000	0.014	298.733	0.930	0.5861384E-01	4.592568	0.3453145E-04	2.123841
08072011	08	0.007	0.003	0.002	0.001	0.002	0.001	0.002	0.003	0.015	0.000	0.014	300.257	0.894	0.4256296E-01	3.290939	0.2522827E-04	2.115432
08072011	09	0.007	0.007	0.005	0.001	0.003	0.001	0.002	0.003	0.014	0.000	0.013	301.469	0.865	0.2171254E-01	2.585062	0.2854750E-04	1.956903
08072011	10	0.004	0.009	0.009	0.000	0.002	0.000	0.001	0.002	0.013	0.000	0.011	302.842	0.812	-99999.00	1.790209	0.4814350E-02	-0.4296338
08072011	11	0.003	0.008	0.011	0.000	0.001	0.000	0.001	0.001	0.010	0.000	0.008	303.953	0.772	0.8387327E-02	1.360995	0.2934551E-02	-0.3336851
08072011	12	0.002	0.005	0.010	0.000	0.001	0.000	0.000	0.001	0.010	0.000	0.008	304.653	0.736	0.8080602E-03	0.9285866	0.2541649E-02	-0.4372931
08072011	13	0.003	0.003	0.009	0.000	0.000	0.000	0.000	0.001	0.011	0.000	0.009	304.552	0.715	0.3712177E-03	0.9408768	0.2689281E-02	-0.4561034
08072011	14	0.002	0.002	0.008	0.000	0.000	0.000	0.000	0.001	0.014	0.000	0.008	305.829	0.694	-99999.00	0.8668142	0.4779897E-02	-0.7414926
08072011	15	0.003	0.002	0.010	0.000	0.000	0.000	0.000	0.001	0.014	0.000	0.009	305.934	0.681	-99999.00	0.9064391	0.7496610E-02	-0.9175262
08072011	16	0.004	0.002	0.009	0.000	0.000	0.000	0.000	0.001	0.014	0.000	0.008	305.838	0.670	-99999.00	0.9029160	0.3854909E-02	-0.6303667
08072011	17	0.006	0.001	0.007	0.000	0.000	0.000	0.000	0.001	0.012	0.000	0.008	305.286	0.666	-99999.00	0.8829293	0.2521427E-02	-0.4557205
08072011	18	0.007	0.001	0.004	0.000	0.000	0.000	0.001	0.001	0.010	0.000	0.007	304.521	0.680	-99999.00	0.7756014	0.5801589E-03	0.1260916
08072011	19	0.009	0.001	0.002	0.001	0.000	0.000	0.001	0.001	0.007	0.000	0.006	303.792	0.699	0.8219182E-02	0.5692182	0.6108627E-05	1.969335
08072011	20	0.009	0.001	0.001	0.001	0.000	0.000	0.001	0.002	0.005	0.000	0.005	302.802	0.694	0.6531775E-02	0.3237298	0.2630274E-05	2.090182
08072011	21	0.009	0.001	0.001	0.001	0.001	0.000	0.001	0.002	0.004	0.000	0.005	301.632	0.740	0.8092284E-02	0.4078191	0.3438230E-05	2.074133
08072011	22	0.010	0.001	0.001	0.001	0.001	0.000	0.001	0.001	0.004	0.000	0.005	301.271	0.729	0.1093501E-01	0.5224215	0.4987272E-05	2.020158
08072011	23	0.010	0.001	0.001	0.001	0.001	0.000	0.001	0.001	0.004	0.000	0.004	300.349	0.794	0.1002395E-01	0.4969413	0.4221929E-05	2.070794
08072011	24	0.009	0.001	0.001	0.001	0.001	0.000	0.001	0.001	0.004	0.000	0.004	299.742	0.837	0.1232308E-01	0.6351506	0.4919390E-05	2.110965
08082011	01	0.007	0.001	0.001	0.001	0.002	0.000	0.001	0.001	0.004	0.000	0.004	299.202	0.858	0.1370800E-01	0.7282211	0.5616862E-05	2.112770
08082011	02	0.006	0.001	0.001	0.001	0.002	0.000	0.001	0.001	0.004	0.000	0.005	298.545	0.893	0.2290243E-01	1.203080	0.9327138E-05	2.110546
08082011	03	0.006	0.002	0.001	0.001	0.003	0.000	0.001	0.001	0.004	0.000	0.005	298.143	0.914	0.2587211E-01	1.458207	0.1026689E-04	2.152380
08082011	04	0.006	0.003	0.001	0.001	0.003	0.000	0.001	0.001	0.005	0.000	0.005	297.899	0.931	0.3114176E-01	1.864030	0.1180456E-04	2.198403
08082011	05	0.007	0.003	0.001	0.001	0.004	0.000	0.001	0.001	0.004	0.000	0.006	297.868	0.923	0.3552330E-01	2.044836	0.1407893E-04	2.162089
08082011	06	0.008	0.003	0.001	0.001	0.004	0.000	0.001	0.001	0.004	0.000	0.006	297.721	0.930	0.3923500E-01	2.332417	0.1518411E-04	2.186417
08082011	07	0.010	0.004	0.001	0.001	0.005	0.000	0.001	0.002	0.003	0.000	0.007	298.013	0.937	0.4270256E-01	2.726396	0.1618357E-04	2.226515
08082011	08	0.008	0.008	0.003	0.001	0.005	0.000	0.001	0.002	0.004	0.000	0.008	299.844	0.873	0.1807690E-01	1.577717	0.1911857E-04	1.916574
08082011	09	0.005	0.024	0.011	0.001	0.004	0.000	0.001	0.002	0.006	0.001	0.008	301.401	0.819	0.7018983E-02	1.181919	0.2913025E-04	1.608244
08082011	10	0.003	0.030	0.018	0.000	0.002	0.000	0.001	0.002	0.006	0.000	0.006	302.903	0.762	-99999.00	0.9092126	0.1306353E-01	-1.157395
08082011	11	0.003	0.021	0.017	0.000	0.001	0.000	0.001	0.001	0.007	0.000	0.006	304.312	0.709	-99999.00	0.7238374	0.1421806E-01	-1.293199
08082011	12	0.004	0.014	0.016	0.000	0.001	0.000	0.001	0.001	0.008	0.000	0.006	305.500	0.668	-99999.00	0.7228596	0.1086381E-01	-1.176928
08082011	13	0.005	0.009	0.015	0.000	0.000	0.000	0.001	0.001	0.008	0.000	0.006	306.651	0.631	-99999.00	0.6079826	0.9847098E-02	-1.209417
08082011	14	0.007	0.007	0.013	0.000	0.000	0.000	0.001	0.001	0.008	0.000	0.006	306.990	0.617	-99999.00	0.6592453	0.5535072E-02	-0.9240762
08082011	15	0.007	0.005	0.012	0.000	0.000	0.000	0.001	0.001	0.008	0.000	0.006	306.450	0.619	-99999.00	0.6574655	0.4620147E-02	-0.8467829
08082011	16	0.007	0.003	0.010	0.000	0.000	0.000	0.000	0.001	0.008	0.000	0.006	305.416	0.637	-99999.00	0.6794647	0.3956368E-02	-0.7651298
08082011	17	0.006	0.002	0.008	0.000	0.000	0.000	0.000	0.001	0.008	0.000	0.005	304.205	0.664	-99999.00	0.6584418	0.1641157E-02	-0.3966326
08082011	18	0.004	0.001	0.006	0.000	0.000	0.000	0.000	0.001	0.008	0.000	0.005	303.455	0.681	-99999.00	0.6069245	0.1724444E-02	-0.4535145
08082011	19	0.005	0.001	0.005	0.000	0.000	0.000	0.001	0.001	0.008	0.000	0.005	302.562	0.704	-99999.00	0.6763462	0.4451705E-03	0.1816427
08082011	20	0.007	0.001	0.005	0.000	0.000	0.000	0.001	0.001	0.007	0.000	0.005	301.092	0.738	-99999.00	0.8195433	0.3021031E-03	0.4334167
08082011	21	0.006	0.001	0.004	0.000	0.000	0.000	0.001	0.002	0.006	0.000	0.005	300.043	0.781	-99999.00	0.7708493	0.1627691E-03	0.6753974
08082011	22	0.005	0.001	0.003	0.000	0.000	0.000	0.001	0.002	0.004	0.000	0.005	299.375	0.812	-99999.00	0.7622519	0.3252943E-03	0.3698221
08082011	23	0.005	0.001	0.002	0.001	0.001	0.000	0.001	0.002	0.003	0.000	0.005	298.949	0.829	0.9825945E-02	0.6007971	0.7472843E-05	1.905242
08082011	24	0.004	0.001	0.001	0.001	0.001	0.000	0.001	0.002	0.002	0.000	0.004	298.661	0.845	0.9005487E-02	0.4488036	0.3580567E-05	2.098104
08092011	01	0.004	0.000	0.001	0.001	0.001	0.000	0.001	0.001	0.002	0.000	0.003	298.383	0.865	0.9870946E-02	0.5106527	0.3798456E-05	2.128519
08092011	02	0.003	0.000	0.000	0.001	0.001	0.000	0.001	0.001	0.002	0.000	0.003	298.233	0.875	-99999.00	0.5492373	0.2139456E-05	2.409457
08092011	03	0.003	0.001	0.000	0.001	0.001	0.000	0.001	0.000	0.002	0.000	0.003	298.127	0.884	-99999.00	0.8247194	0.3429821E-05	2.381035
08092011	04	0.003	0.002	0.001	0.001	0.002	0.000	0.001	0.000	0.003	0.000	0.004	297.988	0.895	0.2450836E-01	1.313874	0.9787374E-05	2.127887
08092011	05	0.003	0.004	0.002	0.001	0.003	0.000	0.001	0.001	0.005	0.000	0.005	297.865	0.905	0.2018803E-01	1.458207	0.1371040E-04	2.026769
08092011	06	0.003	0.007	0.004	0.001	0.003	0.000	0.001	0.001	0.006	0.000	0.006	297.741	0.916	0.2073371E-01	2.041449	0.2493357E-04	1.913154
08092011	07	0.004	0.009	0.007	0.001	0.004	0.000	0.001	0.001	0.007	0.000	0.008	298.075	0.911	0.2031362E-01	2.553865	0.4307827E-04	1.772940
08092011	08	0.005	0.013	0.013	0.002	0.004	0.000	0.001	0.002	0.007	0.001	0.008	299.717	0.866	0.8738279E-02	1.566706	0.4042234E-04	1.588366
08092011	09	0.010	0.026	0.023	0.001	0.003	0.000	0.001	0.002	0.007	0.001	0.008	301.327	0.812	0.4839540E-02	1.113665	0.4008706E-04	1.443750
08092011	10	0.011	0.028	0.018	0.001	0.001	0.000	0.001	0.001	0.006	0.001	0.005	302.599	0.766	0.2925038E-02	0.6079834	0.1788190E-04	1.531478
08092011	11	0.008	0.017	0.011	0.001	0.001	0.000	0.001	0.001	0.004	0.001	0.004	303.925	0.720	0.2162635E-02	0.3791141	0.8164011E-05	1.666866
08092011	12	0.005	0.007	0.008	0.001	0.000	0.000	0.000	0.001	0.005	0.000	0.004	303.387	0.728	0.3015220E-02	0.3880983	0.9238041E-05	1.623362
08092011	13	0.003	0.002	0.005	0.001	0.000	0.000	0.000	0.001	0.006	0.000	0.004	303.569	0.721	0.3643811E-02	0.3745318	0.7147766E-05	1.719318
08092011	14	0.003	0.001	0.004	0.001	0.000	0.000	0.000	0.001	0.006	0.000	0.004	303.536	0.724	0.4059374E-02	0.3745318	0.6449529E-05	1.763961
08092011	15	0.003	0.001	0.004	0.001	0.000	0.000	0.000	0.001	0.008	0.000	0.005	303.233	0.728	0.5654514E-02	0.5174644	0.8963349E-05	1.761410
08092011	16	0.003	0.001	0.004	0.001	0.000	0.000	0.000	0.001	0.009	0.000	0.006	303.016	0.724	0.6960511E-02	0.6242197	0.1135137E-04	1.740289
08092011	17	0.004	0.001	0.004	0.001	0.000	0.000	0.000	0.001	0.010	0.000	0.006	302.619	0.720	0.7120967E-02	0.6242197	0.1184249E-04	1.721894
08092011	18	0.005	0.001	0.004	0.001	0.000	0.000	0.001	0.001	0.011	0.000	0.007	301.668	0.736	0.9152651E-02	0.7934427	0.1376808E-04	1.760642
08092011	19	0.006	0.000	0.003	0.001	0.000	0.000	0.001	0.001	0.011	0.000	0.007	300.555	0.813	0.1384681E-01	1.068323	0.1473436E-04	1.860371
08092011	20	0.006	0.000	0.002	0.001	0.000	0.000	0.001	0.001	0.012	0.000	0.007	299.555	0.857	0.2136040E-01	1.420408	0.1484331E-04	1.980882
08092011	21	0.005	0.000	0.001	0.001	0.000	0.000	0.001	0.001	0.012	0.000	0.007	298.949	0.873	0.3163332E-01	1.522659	0.1322492E-04	2.061210
08092011	22	0.005	0.000	0.001	0.001	0.000	0.000	0.001	0.001	0.011	0.000	0.007	298.611	0.871	0.3161323E-01	1.522659	0.1322151E-04	2.061322
08092011	23	0.005	0.000	0.001	0.001	0.001	0.000	0.001	0.001	0.010	0.000	0.006	298.206	0.902	0.3084993E-01	1.635029	0.1212557E-04	2.129823
08092011	24	0.005	0.000	0.001	0.001	0.001	0.000	0.001	0.001	0.009	0.000	0.006	297.980	0.913	0.3334475E-01	1.812346	0.1284035E-04	2.149664
08102011	01	0.005	0.000	0.001	0.000	0.001	0.000	0.001	0.000	0.008	0.000	0.005	297.630	0.943	-99999.00	2.909284	0.1578384E-03	1.265574
08102011	02	0.005	0.000	0.001	0.000	0.001	0.000	0.001	0.000	0.006	0.000	0.004	297.377	0.958	-99999.00	3.731400	0.1218006E-03	1.486222
08102011	03	0.004	0.000	0.001	0.000	0.001	0.000	0.001	0.000	0.006	0.000	0.004	297.170	0.972	-99999.00	5.011347	0.1554124E-03	1.508469
08102011	04	0.004	0.000	0.001	0.000	0.001	0.000	0.001	0.000	0.005	0.000	0.004	297.055	0.980	-99999.00	7.538352	0.2158789E-03	1.543066
08102011	05	0.005	0.000	0.001	0.000	0.001	0.000	0.001	0.000	0.005	0.000	0.004	296.967	0.986	-99999.00	16.58394	0.1960061E-03	1.927418
08102011	06	0.006	0.000	0.001	0.000	0.002	0.000	0.001	0.000	0.004	0.000	0.004	296.875	0.990	-99999.00	17.21548	0.1363926E-03	2.101128
08102011	07	0.008	0.001	0.001	0.000	0.002	0.000	0.001	0.000	0.004	0.000	0.004	297.211	0.990	-99999.00	17.55324	0.9932478E-04	2.247300
08102011	08	0.009	0.001	0.001	0.000	0.002	0.000	0.001	0.000	0.003	0.000	0.004	298.613	0.961	-99999.00	3.841016	0.7925743E-04	1.685406
08102011	09	0.008	0.007	0.003	0.000	0.003	0.000	0.001	0.001	0.003	0.000	0.004	300.461	0.891	-99999.00	1.510267	0.7018830E-04	1.332789
08102011	10	0.005	0.028	0.007	0.000	0.003	0.000	0.001	0.001	0.005	0.000	0.005	302.179	0.817	-99999.00	1.360309	0.9398872E-03	0.1605618
08102011	11	0.002	0.028	0.008	0.000	0.002	0.000	0.000	0.001	0.010	0.000	0.008	303.292	0.767	0.8100212E-02	1.087101	0.2420273E-02	-0.3475946
08102011	12	0.001	0.013	0.008	0.000	0.001	0.000	0.000	0.001	0.010	0.000	0.009	304.192	0.727	0.1242757E-03	0.9516299	0.2136338E-02	-0.3512019
08102011	13	0.001	0.007	0.008	0.000	0.001	0.000	0.000	0.001	0.010	0.000	0.009	305.620	0.674	0.6294250E-04	0.7546803	0.2066512E-02	-0.4374750
08102011	14	0.001	0.007	0.007	0.000	0.001	0.000	0.000	0.001	0.009	0.000	0.009	306.207	0.653	0.3618002E-04	0.7182673	0.1632347E-02	-0.3565263
08102011	15	0.001	0.008	0.007	0.000	0.001	0.000	0.000	0.001	0.009	0.000	0.009	305.595	0.664	0.4053116E-04	0.7447153	0.1648630E-02	-0.3451329
08102011	16	0.001	0.007	0.006	0.000	0.001	0.000	0.000	0.001	0.010	0.000	0.008	304.515	0.696	0.2136827E-03	0.7750351	0.2355276E-02	-0.4827205
08102011	17	0.002	0.006	0.004	0.000	0.001	0.000	0.000	0.001	0.010	0.000	0.008	302.946	0.742	0.9065866E-03	0.9285866	0.2373214E-02	-0.4075144
08102011	18	0.002	0.005	0.003	0.000	0.000	0.000	0.000	0.001	0.010	0.000	0.008	301.745	0.791	0.6253123E-03	1.096033	0.2254508E-02	-0.3132282
08102011	19	0.002	0.004	0.003	0.000	0.001	0.000	0.000	0.001	0.010	0.000	0.008	300.381	0.846	0.3264010E-02	1.553341	0.2166328E-02	-0.1444576
08102011	20	0.002	0.004	0.003	0.000	0.001	0.000	0.000	0.001	0.010	0.000	0.008	299.421	0.884	0.5255282E-02	1.910722	0.2094727E-02	-0.3992989E-01
08102011	21	0.002	0.003	0.002	0.000	0.001	0.000	0.001	0.001	0.010	0.000	0.008	298.828	0.903	0.3702998E-01	2.290767	0.1933761E-02	0.7357819E-01
08102011	22	0.002	0.002	0.001	0.000	0.001	0.000	0.001	0.001	0.010	0.000	0.007	298.380	0.912	-99999.00	2.175982	0.3200349E-03	0.8324580
08102011	23	0.002	0.001	0.001	0.000	0.001	0.000	0.001	0.001	0.011	0.000	0.007	297.902	0.922	-99999.00	2.442838	0.3075859E-03	0.8999282
08102011	24	0.003	0.001	0.001	0.000	0.001	0.000	0.001	0.001	0.010	0.000	0.006	297.452	0.931	-99999.00	2.489751	0.1587795E-03	1.195362
08112011	01	0.004	0.001	0.001	0.000	0.001	0.000	0.001	0.001	0.009	0.000	0.006	297.046	0.940	-99999.00	2.923570	0.1503240E-03	1.288885
08112011	02	0.008	0.001	0.001	0.000	0.001	0.000	0.001	0.001	0.009	0.000	0.006	296.767	0.945	-99999.00	3.683953	0.7955990E-04	1.665620
08112011	03	0.010	0.002	0.001	0.000	0.001	0.000	0.001	0.001	0.008	0.000	0.006	296.661	0.945	-99999.00	3.703174	0.7055020E-04	1.720076
08112011	04	0.011	0.002	0.001	0.000	0.001	0.000	0.001	0.001	0.008	0.000	0.005	296.625	0.945	-99999.00	3.104190	0.4111627E-04	1.877935
08112011	05	0.011	0.002	0.001	0.000	0.001	0.000	0.001	0.001	0.007	0.000	0.005	296.591	0.947	-99999.00	3.096779	0.4464283E-04	1.841159
08112011	06	0.010	0.001	0.001	0.000	0.001	0.000	0.001	0.001	0.007	0.000	0.005	296.587	0.946	-99999.00	3.087647	0.4896673E-04	1.799726
08112011	07	0.008	0.001	0.001	0.000	0.001	0.000	0.001	0.001	0.006	0.000	0.005	296.754	0.948	-99999.00	3.043642	0.6982566E-04	1.639379
08112011	08	0.004	0.002	0.001	0.001	0.002	0.000	0.001	0.001	0.007	0.000	0.006	297.918	0.930	0.3944856E-01	2.330223	0.1473843E-04	2.198946
08112011	09	0.002	0.003	0.002	0.000	0.002	0.000	0.001	0.001	0.011	0.000	0.008	299.100	0.896	-99999.00	2.315341	0.7125156E-03	0.5118205
08112011	10	0.002	0.002	0.003	0.000	0.002	0.000	0.001	0.001	0.012	0.000	0.009	300.206	0.848	-99999.00	1.803917	0.1409314E-02	0.1072087
08112011	11	0.005	0.003	0.005	0.000	0.001	0.000	0.000	0.001	0.014	0.000	0.008	301.322	0.790	-99999.00	1.471182	0.7602909E-03	0.2866866
08112011	12	0.009	0.003	0.006	0.000	0.001	0.000	0.000	0.001	0.012	0.000	0.007	302.353	0.734	-99999.00	1.134587	0.3418226E-03	0.5210372
08112011	13	0.010	0.003	0.005	0.000	0.001	0.000	0.000	0.001	0.009	0.000	0.006	303.014	0.693	-99999.00	0.8197491	0.2459781E-03	0.5227845
08112011	14	0.011	0.002	0.004	0.000	0.001	0.000	0.000	0.000	0.008	0.000	0.005	303.209	0.677	0.3225207E-03	0.5642670	0.2175064E-03	0.4140126
08112011	15	0.011	0.002	0.004	0.000	0.001	0.000	0.000	0.000	0.007	0.000	0.005	303.173	0.670	0.2797842E-03	0.5470120	0.2432370E-03	0.3519672
08112011	16	0.012	0.003	0.004	0.000	0.001	0.000	0.000	0.000	0.007	0.000	0.004	303.106	0.664	0.2950430E-03	0.4282265	0.1461724E-03	0.4668081
08112011	17	0.013	0.003	0.003	0.001	0.001	0.000	0.000	0.000	0.006	0.000	0.004	302.811	0.662	0.3159046E-03	0.4282265	0.1432570E-03	0.4755576
08112011	18	0.015	0.003	0.002	0.001	0.001	0.000	0.000	0.000	0.006	0.000	0.004	302.400	0.663	0.4057884E-03	0.4282265	0.1194427E-03	0.5545141
08112011	19	0.013	0.003	0.002	0.001	0.001	0.000	0.001	0.000	0.005	0.000	0.004	301.766	0.686	0.7159173E-02	0.4543472	0.6060372E-05	1.874889
08112011	20	0.013	0.002	0.001	0.001	0.001	0.000	0.001	0.000	0.005	0.000	0.004	300.816	0.684	0.9903193E-02	0.4393647	0.4939165E-05	1.949172
08112011	21	0.015	0.002	0.002	0.001	0.001	0.000	0.001	0.000	0.004	0.000	0.004	299.975	0.695	0.8152306E-02	0.4701768	0.7421234E-05	1.801785
08112011	22	0.018	0.003	0.002	0.001	0.001	0.000	0.001	0.001	0.004	0.000	0.004	299.264	0.719	0.6574869E-02	0.3791141	0.5756955E-05	1.818577
08112011	23	0.022	0.003	0.002	0.001	0.001	0.000	0.001	0.001	0.004	0.000	0.004	298.610	0.753	0.7616043E-02	0.4231963	0.6707918E-05	1.799954
08112011	24	0.025	0.004	0.002	0.001	0.001	0.000	0.001	0.001	0.004	0.000	0.003	297.992	0.794	0.5536973E-02	0.3330069	0.4246061E-05	1.894467
08122011	01	0.027	0.004	0.002	0.000	0.001	0.000	0.001	0.001	0.003	0.000	0.003	297.389	0.838	-99999.00	0.6880456	0.8782274E-05	1.894010
08122011	02	0.027	0.004	0.002	0.000	0.001	0.000	0.001	0.001	0.003	0.000	0.003	296.951	0.869	-99999.00	0.8562104	0.8911075E-05	1.982650
08122011	03	0.026	0.004	0.003	0.000	0.001	0.000	0.001	0.001	0.003	0.000	0.003	296.690	0.885	-99999.00	1.238035	0.1160899E-04	2.027938
08122011	04	0.026	0.004	0.003	0.000	0.001	0.000	0.001	0.001	0.003	0.000	0.003	296.502	0.897	-99999.00	1.375115	0.1179101E-04	2.066788
08122011	05	0.026	0.003	0.003	0.000	0.001	0.000	0.001	0.001	0.003	0.000	0.003	296.339	0.908	-99999.00	1.543300	0.1203075E-04	2.108158
08122011	06	0.025	0.003	0.003	0.000	0.001	0.000	0.002	0.001	0.002	0.000	0.003	296.187	0.922	-99999.00	1.750812	0.9500043E-05	2.265514
08122011	07	0.022	0.003	0.002	0.000	0.001	0.000	0.002	0.001	0.001	0.000	0.003	296.435	0.932	-99999.00	1.657571	0.8644272E-05	2.282744
08122011	08	0.016	0.004	0.002	0.000	0.001	0.000	0.002	0.002	0.000	0.000	0.004	298.082	0.888	-99999.00	1.006053	0.1311183E-04	1.884957
08122011	09	0.015	0.011	0.006	0.000	0.001	0.000	0.002	0.002	0.001	0.000	0.004	299.937	0.824	-99999.00	1.044933	0.3467712E-04	1.479046
08122011	10	0.014	0.018	0.007	0.000	0.001	0.000	0.001	0.002	0.003	0.000	0.004	301.568	0.763	-99999.00	0.8274801	0.4775137E-04	1.238772
08122011	11	0.012	0.024	0.006	0.000	0.001	0.000	0.001	0.001	0.004	0.000	0.004	303.268	0.689	-99999.00	0.6507438	0.8419483E-04	0.8881246
08122011	12	0.009	0.032	0.007	0.000	0.001	0.000	0.001	0.001	0.005	0.000	0.004	304.431	0.645	-99999.00	0.5911908	0.1508963E-03	0.5930489
08122011	13	0.007	0.032	0.007	0.000	0.000	0.000	0.001	0.001	0.007	0.000	0.005	305.392	0.610	-99999.00	0.5404221	0.6248053E-03	-0.6301158E-01
08122011	14	0.006	0.025	0.008	0.000	0.000	0.000	0.001	0.001	0.010	0.000	0.007	305.789	0.599	-99999.00	0.6436518	0.2301041E-02	-0.5532734
08122011	15	0.005	0.016	0.009	0.000	0.000	0.000	0.001	0.001	0.013	0.000	0.009	305.672	0.603	-99999.00	0.7519632	0.4729737E-02	-0.7986404
08122011	16	0.005	0.011	0.009	0.000	0.000	0.000	0.001	0.002	0.017	0.000	0.011	305.495	0.609	-99999.00	0.9224902	0.3081132E-02	-0.5237485
08122011	17	0.005	0.008	0.008	0.000	0.000	0.000	0.001	0.002	0.018	0.000	0.012	305.018	0.621	-99999.00	1.000119	0.3194660E-02	-0.5043730
08122011	18	0.006	0.006	0.007	0.000	0.001	0.000	0.001	0.002	0.018	0.000	0.012	304.382	0.634	-99999.00	1.094425	0.1629527E-02	-0.1728756
08122011	19	0.007	0.005	0.005	0.000	0.001	0.000	0.001	0.003	0.017	0.000	0.012	303.482	0.661	-99999.00	1.090755	0.6392130E-03	0.2320816
08122011	20	0.010	0.004	0.004	0.000	0.001	0.001	0.002	0.004	0.015	0.000	0.013	302.320	0.672	-99999.00	1.168109	0.2007713E-03	0.7647816
08122011	21	0.015	0.004	0.004	0.000	0.001	0.001	0.002	0.005	0.012	0.000	0.013	301.372	0.689	-99999.00	1.151547	0.1050721E-03	1.039794
08122011	22	0.018	0.004	0.004	0.000	0.001	0.001	0.002	0.005	0.011	0.000	0.013	300.565	0.714	-99999.00	1.238433	0.8603802E-04	1.158182
08122011	23	0.020	0.004	0.004	0.000	0.001	0.001	0.003	0.006	0.009	0.000	0.013	299.770	0.751	-99999.00	1.294333	0.4528265E-04	1.456114
08122011	24	0.020	0.004	0.004	0.000	0.001	0.001	0.003	0.006	0.008	0.000	0.013	298.997	0.797	-99999.00	1.611726	0.4429144E-04	1.560971
08132011	01	0.019	0.004	0.004	0.000	0.001	0.001	0.003	0.007	0.006	0.000	0.012	298.272	0.846	-99999.00	1.693501	0.2443615E-04	1.840753
08132011	02	0.019	0.005	0.003	0.000	0.001	0.001	0.003	0.007	0.005	0.000	0.012	297.744	0.877	-99999.00	1.927231	0.2281350E-04	1.926742
08132011	03	0.019	0.005	0.002	0.001	0.001	0.001	0.003	0.007	0.005	0.000	0.012	297.432	0.890	0.2059877E-01	1.474425	0.1047505E-04	2.148467
08132011	04	0.019	0.005	0.002	0.001	0.001	0.001	0.003	0.007	0.005	0.000	0.012	297.221	0.896	0.2223891E-01	1.606645	0.1138280E-04	2.149671
08132011	05	0.020	0.005	0.002	0.001	0.001	0.001	0.003	0.007	0.004	0.000	0.012	297.051	0.900	0.2241701E-01	1.606645	0.1153371E-04	2.143951
08132011	06	0.022	0.005	0.002	0.001	0.001	0.001	0.004	0.007	0.004	0.000	0.012	296.918	0.905	0.3597444E-01	1.774151	0.7582005E-05	2.369207
08132011	07	0.025	0.006	0.002	0.000	0.001	0.001	0.004	0.007	0.003	0.000	0.012	297.176	0.912	-99999.00	2.298704	0.1173642E-04	2.291947
08132011	08	0.023	0.005	0.002	0.000	0.001	0.001	0.004	0.007	0.003	0.000	0.012	299.169	0.855	-99999.00	1.490155	0.1338757E-04	2.046530
08132011	09	0.010	0.007	0.012	0.000	0.001	0.001	0.002	0.004	0.014	0.001	0.013	300.779	0.787	-99999.00	2.420512	0.1376498E-02	0.2451316
08132011	10	0.004	0.007	0.021	0.000	0.001	0.000	0.001	0.003	0.018	0.000	0.013	301.927	0.735	-99999.00	1.616623	0.1469719E-01	-0.9586256
08132011	11	0.002	0.004	0.014	0.000	0.000	0.000	0.001	0.002	0.016	0.000	0.012	302.982	0.681	0.1265347E-02	1.047028	0.2930305E-02	-0.4469544
08132011	12	0.002	0.002	0.010	0.000	0.000	0.000	0.001	0.001	0.014	0.000	0.011	303.837	0.637	0.1779795E-03	0.8519444	0.2729847E-02	-0.5057271
08132011	13	0.002	0.001	0.007	0.000	0.000	0.000	0.001	0.001	0.013	0.000	0.010	304.796	0.595	0.1830459E-03	0.6866485	0.2744492E-02	-0.6017275
08132011	14	0.002	0.001	0.005	0.000	0.000	0.000	0.000	0.001	0.012	0.000	0.010	305.368	0.570	0.3314018E-04	0.5786163	0.2276102E-02	-0.5948011
08132011	15	0.001	0.001	0.006	0.000	0.000	0.000	0.000	0.001	0.012	0.000	0.010	305.775	0.561	0.2002716E-04	0.5482847	0.1663736E-02	-0.4820783
08132011	16	0.001	0.001	0.007	0.000	0.000	0.000	0.000	0.001	0.013	0.000	0.011	305.010	0.585	0.2729893E-04	0.6856729	0.1672033E-02	-0.3871279
08132011	17	0.002	0.001	0.005	0.000	0.000	0.000	0.000	0.001	0.012	0.000	0.009	304.221	0.602	0.1337528E-03	0.6216992	0.2660338E-02	-0.6313565
08132011	18	0.002	0.001	0.004	0.000	0.000	0.000	0.001	0.001	0.012	0.000	0.008	303.735	0.602	0.8814752E-02	0.7504675	0.2883254E-02	-0.5845510
08132011	19	0.005	0.001	0.004	0.000	0.000	0.000	0.001	0.001	0.011	0.000	0.007	302.845	0.610	-99999.00	0.6060524	0.7101129E-03	-0.6881718E-01
08132011	20	0.010	0.001	0.003	0.000	0.000	0.000	0.001	0.001	0.011	0.000	0.007	301.176	0.667	-99999.00	0.7418594	0.2031659E-03	0.5624707
08132011	21	0.018	0.002	0.003	0.000	0.001	0.000	0.001	0.001	0.011	0.000	0.008	300.136	0.711	-99999.00	1.010089	0.1138592E-03	0.9479915
08132011	22	0.024	0.003	0.003	0.000	0.001	0.000	0.002	0.002	0.011	0.000	0.008	299.432	0.744	-99999.00	0.9981109	0.4392972E-04	1.356420
08132011	23	0.026	0.003	0.003	0.000	0.001	0.000	0.002	0.002	0.011	0.000	0.009	298.896	0.776	-99999.00	1.343832	0.4992130E-04	1.430059
08132011	24	0.025	0.003	0.003	0.000	0.001	0.000	0.002	0.002	0.010	0.000	0.008	298.342	0.822	-99999.00	1.456541	0.3958009E-04	1.565846
08142011	01	0.019	0.002	0.002	0.001	0.001	0.000	0.002	0.001	0.010	0.000	0.008	297.763	0.878	0.2945656E-01	1.915169	0.2018348E-04	1.977211
08142011	02	0.012	0.001	0.001	0.001	0.001	0.000	0.002	0.001	0.009	0.000	0.007	297.388	0.912	0.4016447E-01	2.165397	0.1505565E-04	2.157838
08142011	03	0.008	0.001	0.001	0.001	0.001	0.000	0.001	0.001	0.008	0.000	0.006	297.182	0.927	0.4107952E-01	2.329126	0.1540138E-04	2.179633
08142011	04	0.006	0.000	0.001	0.000	0.001	0.000	0.001	0.001	0.007	0.000	0.005	297.049	0.936	-99999.00	2.486181	0.8194561E-04	1.482007
08142011	05	0.004	0.000	0.001	0.000	0.001	0.000	0.001	0.001	0.006	0.000	0.004	296.946	0.945	-99999.00	2.385202	0.6885338E-04	1.539600
08142011	06	0.004	0.000	0.001	0.000	0.001	0.000	0.001	0.001	0.005	0.000	0.004	296.822	0.952	-99999.00	2.357426	0.8325739E-04	1.452015
08142011	07	0.004	0.000	0.001	0.000	0.001	0.000	0.001	0.001	0.004	0.000	0.003	297.099	0.940	-99999.00	1.464968	0.4017207E-04	1.561904
08142011	08	0.003	0.000	0.001	0.001	0.000	0.000	0.001	0.001	0.004	0.000	0.003	298.587	0.892	0.1118195E-01	0.5872234	0.3929116E-05	2.174508
08142011	09	0.003	0.001	0.002	0.001	0.000	0.000	0.001	0.001	0.004	0.000	0.003	300.119	0.828	0.5716383E-02	0.3873004	0.3437722E-05	2.051777
08142011	10	0.004	0.001	0.002	0.001	0.000	0.000	0.001	0.001	0.004	0.000	0.003	301.849	0.733	0.3695488E-02	0.2464052	0.2331734E-05	2.023971
08142011	11	0.004	0.001	0.003	0.001	0.000	0.000	0.001	0.001	0.004	0.000	0.004	303.283	0.668	0.3741622E-02	0.3011535	0.3883854E-05	1.889525
08142011	12	0.003	0.001	0.004	0.000	0.000	0.000	0.000	0.001	0.006	0.000	0.004	304.480	0.615	-99999.00	0.3583392	0.1154892E-02	-0.5082473
08142011	13	0.002	0.001	0.005	0.000	0.000	0.000	0.000	0.001	0.007	0.000	0.005	305.876	0.558	-99999.00	0.3254448	0.3618059E-02	-1.045998
08142011	14	0.002	0.000	0.006	0.000	0.000	0.000	0.000	0.001	0.007	0.000	0.005	307.050	0.503	-99999.00	0.2746931	0.4578929E-02	-1.221916
08142011	15	0.002	0.000	0.006	0.000	0.000	0.000	0.001	0.001	0.007	0.000	0.005	306.971	0.498	-99999.00	0.2734364	0.3352553E-02	-1.088519
08142011	16	0.003	0.000	0.006	0.000	0.000	0.000	0.001	0.001	0.008	0.000	0.005	306.391	0.512	-99999.00	0.3221551	0.1591015E-02	-0.6936092
08142011	17	0.004	0.000	0.005	0.000	0.000	0.000	0.001	0.001	0.008	0.000	0.006	305.386	0.535	-99999.00	0.3975460	0.1798447E-02	-0.6555104
08142011	18	0.006	0.001	0.003	0.001	0.000	0.000	0.001	0.001	0.007	0.000	0.006	304.165	0.575	0.4742265E-02	0.3712378	0.5946257E-05	1.795408
08142011	19	0.006	0.001	0.002	0.001	0.000	0.000	0.001	0.002	0.006	0.000	0.006	302.657	0.629	0.5744636E-02	0.3554162	0.4824760E-05	1.867262
08142011	20	0.005	0.001	0.001	0.001	0.001	0.000	0.001	0.002	0.006	0.000	0.006	299.634	0.758	0.1299268E-01	0.5844795	0.6131438E-05	1.979207
08142011	21	0.004	0.001	0.001	0.002	0.001	0.000	0.001	0.002	0.005	0.000	0.006	298.203	0.808	0.1467901E-01	0.7237243	0.8528462E-05	1.928702
08142011	22	0.004	0.001	0.001	0.002	0.001	0.000	0.001	0.002	0.004	0.000	0.006	297.371	0.829	0.1621997E-01	0.8000004	0.9331476E-05	1.933140
08142011	23	0.003	0.002	0.001	0.002	0.001	0.000	0.001	0.002	0.004	0.000	0.006	296.714	0.841	0.000000	1.268062	0.1564819E-02	-0.9132370E-01
08142011	24	0.003	0.003	0.001	0.002	0.001	0.000	0.001	0.002	0.004	0.000	0.006	296.150	0.854	0.000000	1.343658	0.1522571E-02	-0.5428867E-01
08152011	01	0.003	0.004	0.002	0.002	0.001	0.000	0.001	0.002	0.006	0.000	0.007	295.637	0.860	0.000000	1.670973	0.1638732E-02	0.8461469E-02
08152011	02	0.003	0.006	0.002	0.002	0.001	0.000	0.002	0.001	0.011	0.000	0.009	295.213	0.861	0.3254217E-01	1.898063	0.3071846E-04	1.790911
08152011	03	0.003	0.007	0.002	0.002	0.002	0.000	0.002	0.002	0.015	0.000	0.011	294.843	0.858	0.3737646E-01	2.148629	0.3658992E-04	1.768800
08152011	04	0.003	0.008	0.002	0.002	0.002	0.000	0.002	0.002	0.017	0.000	0.013	294.473	0.860	0.4677612E-01	2.625956	0.4705773E-04	1.746656
08152011	05	0.003	0.008	0.002	0.002	0.002	0.000	0.002	0.002	0.019	0.000	0.014	294.069	0.867	0.5450219E-01	3.067341	0.5468292E-04	1.748910
08152011	06	0.004	0.008	0.003	0.002	0.002	0.000	0.002	0.002	0.020	0.000	0.015	293.682	0.879	0.5447018E-01	3.577813	0.7381012E-04	1.685502
08152011	07	0.004	0.007	0.003	0.002	0.002	0.000	0.002	0.002	0.021	0.001	0.015	293.586	0.867	0.4648918E-01	3.323096	0.8228380E-04	1.606228
08152011	08	0.004	0.014	0.009	0.002	0.002	0.000	0.003	0.002	0.023	0.001	0.016	294.771	0.826	0.2611774E-01	2.784114	0.1091363E-03	1.406718
08152011	09	0.006	0.026	0.020	0.001	0.002	0.000	0.003	0.003	0.027	0.002	0.019	296.782	0.743	0.1392365E-01	2.145993	0.1395104E-03	1.187022
08152011	10	0.004	0.042	0.034	0.001	0.001	0.000	0.002	0.003	0.040	0.002	0.027	298.817	0.620	0.000000	2.128867	0.3771265E-02	-0.2483386
08152011	11	0.002	0.042	0.043	0.000	0.001	0.000	0.002	0.004	0.049	0.002	0.035	300.713	0.540	0.3630519E-03	1.951762	0.6579911E-02	-0.5277932
08152011	12	0.002	0.031	0.038	0.000	0.001	0.000	0.002	0.004	0.047	0.002	0.035	302.657	0.468	0.1025796E-03	1.489913	0.7417198E-02	-0.6970789
08152011	13	0.002	0.026	0.032	0.001	0.001	0.000	0.002	0.004	0.045	0.001	0.033	304.433	0.405	0.000000	1.167107	0.6505919E-02	-0.7461981
08152011	14	0.003	0.021	0.025	0.001	0.001	0.000	0.002	0.004	0.044	0.001	0.031	305.231	0.377	0.000000	1.071078	0.5722600E-02	-0.7277724
08152011	15	0.004	0.019	0.021	0.001	0.001	0.000	0.002	0.003	0.044	0.001	0.031	304.817	0.386	0.000000	1.126559	0.5944084E-02	-0.7223311
08152011	16	0.004	0.018	0.019	0.001	0.001	0.000	0.002	0.003	0.045	0.001	0.031	303.871	0.412	0.000000	1.236908	0.5717922E-02	-0.6649010
08152011	17	0.004	0.018	0.018	0.000	0.001	0.000	0.002	0.003	0.046	0.001	0.031	302.563	0.445	0.6576777E-03	1.439995	0.5343138E-02	-0.5694355
08152011	18	0.004	0.019	0.016	0.000	0.001	0.000	0.002	0.003	0.048	0.001	0.032	301.233	0.479	0.9881854E-03	1.641546	0.5226796E-02	-0.5029824
08152011	19	0.005	0.016	0.013	0.000	0.001	0.000	0.002	0.004	0.050	0.001	0.032	300.305	0.509	0.1711458E-01	2.092959	0.4781728E-02	-0.3588242
08152011	20	0.007	0.014	0.011	0.000	0.001	0.001	0.002	0.004	0.051	0.001	0.032	298.770	0.552	-99999.00	2.269058	0.4409949E-02	-0.2885879
08152011	21	0.013	0.013	0.010	0.000	0.001	0.001	0.003	0.005	0.050	0.001	0.032	297.559	0.596	-99999.00	2.661801	0.9330633E-03	0.4552645
08152011	22	0.016	0.011	0.008	0.001	0.001	0.001	0.003	0.006	0.049	0.001	0.033	296.568	0.647	0.3002769E-01	2.714907	0.1415930E-03	1.282713
08152011	23	0.014	0.009	0.006	0.001	0.001	0.001	0.004	0.007	0.051	0.001	0.035	295.782	0.696	0.4090786E-01	3.291176	0.1417887E-03	1.365710
08152011	24	0.011	0.008	0.005	0.002	0.002	0.001	0.004	0.007	0.053	0.001	0.037	295.296	0.723	0.4980969E-01	3.789777	0.1555002E-03	1.386883
08162011	01	0.009	0.007	0.004	0.002	0.002	0.001	0.004	0.008	0.057	0.001	0.040	294.610	0.784	0.6967676E-01	5.063470	0.1721817E-03	1.468461
08162011	02	0.004	0.007	0.004	0.002	0.002	0.001	0.005	0.008	0.063	0.001	0.041	294.109	0.824	0.8275449E-01	6.253283	0.1901800E-03	1.516943
08162011	03	0.004	0.007	0.005	0.002	0.002	0.001	0.005	0.008	0.064	0.001	0.043	293.740	0.843	0.9006858E-03	10.34099	0.4175885E-02	0.3938138
08162011	04	0.004	0.011	0.007	0.001	0.003	0.001	0.005	0.008	0.066	0.002	0.044	293.361	0.860	0.1675844E-02	12.41214	0.4230210E-02	0.4674849
08162011	05	0.004	0.016	0.011	0.001	0.003	0.001	0.005	0.008	0.069	0.002	0.045	293.000	0.875	0.1402557E-02	15.13525	0.4304017E-02	0.5461156
08162011	06	0.004	0.017	0.012	0.001	0.003	0.001	0.005	0.008	0.070	0.002	0.046	292.729	0.887	0.1188517E-02	16.13898	0.4207272E-02	0.5838756
08162011	07	0.004	0.021	0.015	0.001	0.003	0.001	0.006	0.008	0.071	0.002	0.047	292.541	0.906	0.6196499E-03	19.92957	0.4211730E-02	0.6750373
08162011	08	0.003	0.034	0.029	0.001	0.003	0.001	0.005	0.008	0.072	0.003	0.050	293.794	0.873	0.4028082E-03	11.24511	0.3952818E-02	0.4540567
08162011	09	0.002	0.051	0.043	0.000	0.002	0.001	0.005	0.007	0.070	0.002	0.053	296.339	0.772	0.6035388E-02	6.667628	0.6566673E-02	0.6625973E-02
08162011	10	0.001	0.075	0.057	0.000	0.002	0.001	0.004	0.007	0.065	0.002	0.054	298.909	0.662	0.6890297E-03	4.235760	0.8623114E-02	-0.3087328
08162011	11	0.001	0.072	0.067	0.000	0.002	0.001	0.003	0.006	0.060	0.001	0.053	301.077	0.565	0.1435876E-03	2.972932	0.5312445E-02	-0.2521095
08162011	12	0.001	0.059	0.064	0.000	0.001	0.001	0.003	0.005	0.056	0.001	0.052	302.844	0.505	0.6902218E-04	2.506953	0.2669829E-02	-0.2733714E-01
08162011	13	0.001	0.051	0.055	0.000	0.001	0.001	0.003	0.005	0.052	0.001	0.050	304.690	0.449	0.3325939E-04	1.934460	0.1831474E-02	0.2375895E-01
08162011	14	0.001	0.047	0.049	0.000	0.001	0.001	0.002	0.005	0.050	0.001	0.049	305.836	0.417	0.2020597E-04	1.706882	0.1444048E-02	0.7262189E-01
08162011	15	0.001	0.044	0.044	0.000	0.001	0.001	0.002	0.004	0.049	0.001	0.046	305.993	0.407	0.1966953E-04	1.559845	0.1562469E-02	-0.7299400E-03
08162011	16	0.001	0.039	0.037	0.000	0.001	0.001	0.002	0.004	0.047	0.001	0.043	305.676	0.407	0.2163649E-04	1.441935	0.1805445E-02	-0.9763864E-01
08162011	17	0.001	0.035	0.030	0.000	0.001	0.001	0.002	0.004	0.046	0.001	0.040	304.478	0.418	0.2801418E-04	1.370067	0.2524350E-02	-0.2654079
08162011	18	0.001	0.031	0.022	0.000	0.001	0.001	0.002	0.004	0.049	0.001	0.040	303.813	0.430	0.3576279E-04	1.403841	0.4073208E-02	-0.4626189
08162011	19	0.002	0.025	0.015	0.001	0.001	0.001	0.002	0.005	0.052	0.001	0.039	302.251	0.520	0.000000	2.060673	0.6435404E-02	-0.4945666
08162011	20	0.004	0.024	0.012	0.001	0.001	0.001	0.003	0.005	0.056	0.001	0.040	300.888	0.457	0.000000	1.886604	0.5695746E-02	-0.4798698
08162011	21	0.005	0.024	0.008	0.002	0.001	0.001	0.003	0.006	0.061	0.001	0.042	299.252	0.512	0.1753569E-03	2.393237	0.4587367E-02	-0.2825777
08162011	22	0.009	0.028	0.008	0.003	0.002	0.001	0.004	0.006	0.066	0.001	0.043	298.102	0.563	0.2998406E-01	2.837601	0.1607324E-03	1.246848
08162011	23	0.018	0.032	0.008	0.002	0.002	0.001	0.004	0.007	0.067	0.001	0.044	297.123	0.616	0.3618866E-01	3.387146	0.1780370E-03	1.279324
08162011	24	0.026	0.033	0.008	0.002	0.002	0.001	0.004	0.009	0.065	0.002	0.045	296.193	0.683	0.4093933E-01	3.972237	0.2167095E-03	1.263157
08172011	01	0.030	0.032	0.007	0.002	0.002	0.002	0.005	0.010	0.062	0.002	0.045	295.514	0.738	0.5536747E-01	4.795875	0.1857969E-03	1.411829
08172011	02	0.026	0.032	0.006	0.002	0.002	0.002	0.005	0.011	0.058	0.002	0.044	294.795	0.803	0.7390141E-01	5.751212	0.1689583E-03	1.531980
08172011	03	0.021	0.032	0.006	0.002	0.002	0.002	0.005	0.011	0.054	0.002	0.043	294.500	0.815	0.6693679E-01	6.110923	0.2012319E-03	1.482410
08172011	04	0.019	0.030	0.006	0.002	0.003	0.002	0.005	0.012	0.050	0.002	0.041	294.332	0.816	0.6797028E-01	5.570542	0.1635263E-03	1.532310
08172011	05	0.017	0.028	0.007	0.002	0.003	0.002	0.006	0.012	0.046	0.002	0.040	294.267	0.811	0.5587530E-01	5.111290	0.1730308E-03	1.470407
08172011	06	0.015	0.026	0.008	0.002	0.003	0.002	0.006	0.012	0.042	0.002	0.038	294.306	0.803	0.4474074E-01	4.536242	0.1746142E-03	1.414617
08172011	07	0.016	0.025	0.010	0.001	0.003	0.002	0.006	0.013	0.037	0.002	0.037	294.689	0.796	0.3875840E-01	4.195902	0.1586523E-03	1.422379
08172011	08	0.010	0.024	0.013	0.001	0.003	0.002	0.007	0.014	0.039	0.002	0.037	297.131	0.729	0.2218854E-01	3.060323	0.1184088E-03	1.412383
08172011	09	0.019	0.075	0.039	0.000	0.003	0.002	0.005	0.011	0.037	0.002	0.034	299.001	0.659	-99999.00	3.473258	0.1358619E-01	-0.5923606
08172011	10	0.026	0.086	0.038	0.000	0.002	0.001	0.003	0.007	0.044	0.001	0.032	301.203	0.582	-99999.00	2.911969	0.8037729E-02	-0.4409466
08172011	11	0.037	0.080	0.033	0.000	0.002	0.001	0.002	0.005	0.048	0.001	0.031	303.468	0.482	-99999.00	2.267132	0.6436777E-03	0.5468082
08172011	12	0.035	0.060	0.030	0.000	0.001	0.001	0.002	0.004	0.051	0.001	0.031	304.880	0.435	-99999.00	1.945204	0.6318613E-03	0.4883434
08172011	13	0.023	0.048	0.028	0.000	0.001	0.000	0.002	0.004	0.052	0.001	0.031	306.276	0.397	-99999.00	1.536019	0.3641565E-02	-0.3748915
08172011	14	0.017	0.042	0.027	0.000	0.001	0.000	0.002	0.003	0.050	0.001	0.030	307.190	0.373	-99999.00	1.295799	0.8529373E-02	-0.8183795
08172011	15	0.011	0.036	0.028	0.000	0.001	0.000	0.002	0.003	0.047	0.001	0.028	307.182	0.370	-99999.00	1.164353	0.1431602E-01	-1.089738
08172011	16	0.008	0.033	0.028	0.000	0.001	0.000	0.002	0.003	0.044	0.001	0.027	306.791	0.376	-99999.00	1.122613	0.1884517E-01	-1.224970
08172011	17	0.008	0.031	0.027	0.000	0.001	0.000	0.002	0.003	0.043	0.001	0.026	306.065	0.387	-99999.00	1.128479	0.1706372E-01	-1.179580
08172011	18	0.009	0.029	0.024	0.000	0.001	0.000	0.002	0.003	0.042	0.000	0.026	305.719	0.379	-99999.00	1.087277	0.1329946E-01	-1.087494
08172011	19	0.014	0.027	0.022	0.000	0.001	0.001	0.002	0.004	0.041	0.000	0.026	304.893	0.382	-99999.00	1.165797	0.4274026E-02	-0.5642141
08172011	20	0.019	0.025	0.020	0.000	0.001	0.001	0.002	0.005	0.038	0.000	0.026	302.828	0.428	-99999.00	1.380601	0.1415998E-02	-0.1099445E-01
08172011	21	0.022	0.024	0.016	0.000	0.001	0.001	0.003	0.006	0.036	0.000	0.026	301.129	0.482	-99999.00	1.521157	0.3870142E-03	0.5944471
08172011	22	0.021	0.024	0.013	0.000	0.001	0.001	0.003	0.007	0.034	0.000	0.027	299.785	0.540	-99999.00	1.779456	0.4088859E-03	0.6386852
08172011	23	0.019	0.025	0.010	0.000	0.001	0.001	0.004	0.007	0.034	0.001	0.027	298.679	0.604	-99999.00	2.077500	0.3385946E-03	0.7878610
08172011	24	0.016	0.029	0.009	0.001	0.001	0.001	0.004	0.008	0.034	0.001	0.028	297.701	0.677	0.2068955E-01	2.205784	0.8970239E-04	1.390759
08182011	01	0.012	0.034	0.008	0.001	0.001	0.001	0.004	0.008	0.036	0.001	0.029	296.835	0.758	0.2969223E-01	3.066087	0.1078921E-03	1.453595
08182011	02	0.005	0.040	0.007	0.001	0.001	0.001	0.004	0.008	0.041	0.001	0.030	296.301	0.796	0.3825945E-01	3.792353	0.1185662E-03	1.504948
08182011	03	0.004	0.044	0.006	0.001	0.002	0.001	0.004	0.008	0.044	0.001	0.032	295.838	0.826	0.9058118E-03	7.988935	0.4209937E-02	0.2782134
08182011	04	0.004	0.045	0.005	0.001	0.002	0.001	0.004	0.008	0.046	0.001	0.034	295.492	0.843	0.8863211E-03	8.031641	0.4019072E-02	0.3006785
08182011	05	0.004	0.042	0.005	0.001	0.002	0.001	0.004	0.008	0.047	0.001	0.035	295.250	0.846	0.8212924E-03	8.286058	0.3914212E-02	0.3257036
08182011	06	0.004	0.037	0.004	0.001	0.002	0.002	0.005	0.008	0.049	0.001	0.036	295.021	0.851	0.1092732E-02	9.869412	0.4183834E-02	0.3727168
08182011	07	0.004	0.033	0.004	0.001	0.002	0.002	0.005	0.009	0.050	0.001	0.036	294.942	0.865	0.8148503E-01	6.904490	0.1414498E-03	1.688529
08182011	08	0.004	0.033	0.007	0.001	0.002	0.002	0.005	0.009	0.051	0.001	0.037	296.614	0.808	0.1031756E-02	8.694973	0.4768989E-02	0.2608420
08182011	09	0.005	0.044	0.021	0.000	0.004	0.001	0.004	0.007	0.054	0.001	0.038	299.090	0.707	0.3276449E-01	5.506699	0.5577621E-02	-0.5557726E-02
08182011	10	0.005	0.045	0.025	0.000	0.004	0.001	0.004	0.006	0.054	0.000	0.038	301.572	0.609	0.1947850E-01	3.764592	0.5870865E-02	-0.1929842
08182011	11	0.006	0.036	0.028	0.000	0.003	0.001	0.003	0.005	0.054	0.000	0.037	304.128	0.501	0.1158249E-01	2.619252	0.6400481E-02	-0.3880353
08182011	12	0.006	0.029	0.031	0.000	0.002	0.001	0.003	0.005	0.052	0.000	0.035	305.938	0.437	0.8318603E-02	2.182462	0.6961467E-02	-0.5037540
08182011	13	0.006	0.028	0.031	0.000	0.002	0.001	0.002	0.004	0.049	0.001	0.032	307.809	0.384	0.5786359E-02	1.739189	0.7374986E-02	-0.6274145
08182011	14	0.006	0.028	0.029	0.000	0.001	0.001	0.002	0.004	0.045	0.001	0.029	308.816	0.361	-99999.00	1.120747	0.1945353E-01	-1.239491
08182011	15	0.007	0.028	0.026	0.000	0.001	0.001	0.002	0.004	0.041	0.001	0.026	308.555	0.370	-99999.00	1.060520	0.1365142E-01	-1.109659
08182011	16	0.008	0.029	0.023	0.000	0.001	0.001	0.002	0.004	0.037	0.001	0.024	307.802	0.391	-99999.00	1.056799	0.1019715E-01	-0.9844864
08182011	17	0.010	0.030	0.021	0.000	0.001	0.001	0.002	0.004	0.035	0.001	0.023	306.753	0.418	-99999.00	1.147757	0.6855146E-02	-0.7761667
08182011	18	0.012	0.029	0.017	0.000	0.001	0.001	0.002	0.004	0.034	0.001	0.023	305.775	0.433	-99999.00	1.193299	0.3505761E-02	-0.4680329
08182011	19	0.015	0.026	0.014	0.000	0.001	0.001	0.002	0.004	0.033	0.001	0.023	304.726	0.456	-99999.00	1.325721	0.1472272E-02	-0.4553613E-01
08182011	20	0.018	0.022	0.012	0.000	0.001	0.001	0.003	0.005	0.031	0.001	0.023	302.945	0.503	-99999.00	1.425271	0.5025489E-03	0.4527192
08182011	21	0.022	0.021	0.011	0.000	0.001	0.001	0.003	0.006	0.029	0.001	0.023	301.520	0.549	-99999.00	1.593268	0.2696236E-03	0.7715310
08182011	22	0.024	0.019	0.011	0.000	0.001	0.001	0.003	0.006	0.028	0.000	0.023	300.354	0.602	-99999.00	1.847287	0.2271273E-03	0.9102650
08182011	23	0.025	0.017	0.011	0.000	0.001	0.001	0.004	0.007	0.027	0.000	0.023	299.395	0.660	-99999.00	2.150100	0.1509482E-03	1.153631
08182011	24	0.023	0.014	0.010	0.000	0.001	0.001	0.004	0.007	0.028	0.000	0.023	298.568	0.721	-99999.00	2.624106	0.1443652E-03	1.259519
08192011	01	0.021	0.012	0.009	0.000	0.001	0.001	0.004	0.007	0.028	0.001	0.024	297.812	0.787	-99999.00	3.683884	0.2039110E-03	1.256865
08192011	02	0.019	0.010	0.008	0.000	0.001	0.001	0.004	0.007	0.028	0.001	0.024	297.259	0.835	-99999.00	4.701946	0.2108375E-03	1.348330
08192011	03	0.016	0.008	0.007	0.000	0.001	0.001	0.004	0.007	0.029	0.001	0.024	296.911	0.860	-99999.00	5.205676	0.2251139E-03	1.364075
08192011	04	0.015	0.007	0.006	0.000	0.002	0.001	0.004	0.006	0.029	0.001	0.024	296.647	0.875	-99999.00	6.141171	0.2505865E-03	1.389294
08192011	05	0.015	0.006	0.006	0.000	0.002	0.001	0.004	0.006	0.030	0.001	0.024	296.424	0.889	-99999.00	6.716759	0.2229849E-03	1.478884
08192011	06	0.016	0.006	0.006	0.000	0.002	0.001	0.004	0.006	0.029	0.001	0.024	296.252	0.903	-99999.00	7.389477	0.2184487E-03	1.529264
08192011	07	0.020	0.005	0.006	0.000	0.002	0.001	0.004	0.007	0.028	0.001	0.024	296.382	0.913	-99999.00	7.928065	0.1411977E-03	1.749339
08192011	08	0.017	0.005	0.006	0.000	0.002	0.001	0.004	0.006	0.029	0.001	0.024	298.131	0.857	-99999.00	5.286425	0.2380284E-03	1.346533
08192011	09	0.012	0.009	0.008	0.000	0.002	0.001	0.003	0.005	0.036	0.001	0.025	300.336	0.767	-99999.00	3.676898	0.5593519E-03	0.8177964
08192011	10	0.013	0.017	0.010	0.000	0.002	0.001	0.003	0.004	0.037	0.001	0.026	302.554	0.666	-99999.00	2.776742	0.1185875E-02	0.3694967
08192011	11	0.014	0.062	0.015	0.000	0.002	0.001	0.002	0.004	0.037	0.001	0.026	304.598	0.569	-99999.00	2.111315	0.2668356E-02	-0.1016907
08192011	12	0.013	0.079	0.019	0.000	0.002	0.001	0.002	0.004	0.038	0.001	0.026	306.047	0.513	-99999.00	1.773917	0.4649779E-02	-0.4184990
08192011	13	0.012	0.071	0.021	0.000	0.002	0.001	0.002	0.004	0.038	0.001	0.026	307.605	0.461	-99999.00	1.499833	0.6558094E-02	-0.6407349
08192011	14	0.010	0.063	0.020	0.000	0.002	0.001	0.002	0.004	0.038	0.001	0.025	308.636	0.428	-99999.00	1.304630	0.5712302E-02	-0.6413236
08192011	15	0.007	0.049	0.018	0.000	0.001	0.001	0.002	0.004	0.037	0.001	0.024	308.774	0.418	-99999.00	1.152658	0.6586459E-02	-0.7569516
08192011	16	0.006	0.033	0.015	0.000	0.001	0.000	0.001	0.003	0.032	0.000	0.023	308.413	0.420	0.4786551E-02	1.013140	0.5481339E-02	-0.7332171
08192011	17	0.004	0.022	0.013	0.000	0.001	0.000	0.001	0.003	0.030	0.000	0.022	307.732	0.429	0.2830029E-03	0.9315885	0.4974437E-02	-0.7275198
08192011	18	0.004	0.014	0.007	0.000	0.001	0.000	0.001	0.003	0.027	0.000	0.020	306.320	0.483	0.8446574E-03	0.9976881	0.4487200E-02	-0.6529806
08192011	19	0.005	0.007	0.003	0.001	0.001	0.000	0.001	0.002	0.025	0.000	0.017	304.465	0.569	0.8785725E-04	1.490162	0.4439003E-02	-0.4740519
08192011	20	0.006	0.004	0.003	0.001	0.001	0.000	0.001	0.002	0.023	0.000	0.015	303.271	0.542	0.1286161E-01	0.9339441	0.1962828E-04	1.677439
08192011	21	0.009	0.003	0.003	0.001	0.001	0.001	0.002	0.003	0.021	0.000	0.014	302.140	0.564	0.1190645E-01	0.8771879	0.1421111E-04	1.790465
08192011	22	0.010	0.002	0.003	0.001	0.001	0.001	0.002	0.003	0.021	0.000	0.014	301.069	0.618	0.1460707E-01	1.044793	0.1731293E-04	1.780660
08192011	23	0.008	0.002	0.002	0.002	0.001	0.001	0.002	0.003	0.020	0.000	0.014	300.117	0.690	0.2053946E-01	1.293669	0.1840911E-04	1.846790
08192011	24	0.004	0.001	0.002	0.002	0.001	0.000	0.002	0.003	0.018	0.000	0.013	299.239	0.756	0.2357715E-01	1.441627	0.2293192E-04	1.798412
08202011	01	0.003	0.001	0.001	0.002	0.001	0.000	0.001	0.002	0.017	0.000	0.012	298.190	0.838	0.4144555E-01	2.111944	0.2427315E-04	1.939556
08202011	02	0.003	0.001	0.002	0.002	0.001	0.000	0.001	0.002	0.015	0.000	0.011	297.508	0.884	0.000000	3.579540	0.2638134E-02	0.1325303
08202011	03	0.002	0.001	0.001	0.001	0.001	0.000	0.001	0.001	0.014	0.000	0.011	297.109	0.920	0.000000	4.005338	0.2299623E-02	0.2409825
08202011	04	0.001	0.001	0.001	0.001	0.001	0.000	0.001	0.001	0.012	0.000	0.012	296.801	0.942	0.000000	5.884291	0.2792725E-02	0.3236659
08202011	05	0.001	0.000	0.001	0.001	0.001	0.000	0.001	0.001	0.010	0.000	0.013	296.709	0.942	0.000000	6.551532	0.3714570E-02	0.2464344
08202011	06	0.000	0.000	0.001	0.001	0.001	0.000	0.001	0.001	0.009	0.000	0.013	296.649	0.933	0.000000	5.850622	0.4402692E-02	0.1234837
08202011	07	0.000	0.002	0.001	0.001	0.001	0.000	0.001	0.001	0.010	0.000	0.015	296.601	0.938	0.000000	7.978623	0.5690177E-02	0.1468022
08202011	08	0.001	0.007	0.004	0.001	0.002	0.000	0.001	0.003	0.019	0.000	0.025	297.900	0.904	0.000000	7.377481	0.5855199E-02	0.1003664
08202011	09	0.001	0.013	0.010	0.001	0.002	0.001	0.002	0.005	0.027	0.001	0.032	299.805	0.834	0.000000	5.385201	0.4401004E-02	0.8765010E-01
08202011	10	0.001	0.013	0.017	0.001	0.002	0.001	0.002	0.006	0.031	0.001	0.035	301.866	0.758	0.000000	4.089445	0.3889329E-02	0.2178966E-01
08202011	11	0.002	0.010	0.024	0.001	0.002	0.001	0.002	0.005	0.034	0.001	0.031	304.460	0.646	0.000000	2.341066	0.4423382E-02	-0.2763408
08202011	12	0.003	0.007	0.026	0.000	0.001	0.000	0.001	0.003	0.028	0.001	0.022	306.332	0.560	0.1879334E-03	1.286189	0.4481560E-02	-0.5421243
08202011	13	0.004	0.004	0.020	0.000	0.001	0.000	0.001	0.002	0.020	0.000	0.015	307.816	0.503	0.3487170E-02	0.8327290	0.4208484E-02	-0.7036220
08202011	14	0.004	0.001	0.011	0.000	0.000	0.000	0.001	0.001	0.016	0.000	0.012	306.303	0.546	0.5125999E-03	0.7620614	0.3506048E-02	-0.6628279
08202011	15	0.003	0.000	0.005	0.000	0.000	0.000	0.000	0.001	0.013	0.000	0.008	306.106	0.553	-99999.00	0.5458612	0.2866719E-02	-0.7203029
08202011	16	0.003	0.000	0.004	0.000	0.000	0.000	0.000	0.001	0.010	0.000	0.006	304.651	0.597	-99999.00	0.4887123	0.1457344E-02	-0.4745088
08202011	17	0.004	0.000	0.003	0.000	0.000	0.000	0.000	0.001	0.007	0.000	0.004	303.446	0.643	-99999.00	0.3880170	0.3338722E-03	0.6527050E-01
08202011	18	0.005	0.000	0.002	0.001	0.000	0.000	0.000	0.001	0.005	0.000	0.004	302.199	0.715	0.6031871E-02	0.3745318	0.5400701E-05	1.841039
08202011	19	0.006	0.000	0.002	0.001	0.000	0.000	0.001	0.001	0.005	0.000	0.004	301.035	0.772	0.6835818E-02	0.4409390	0.4803590E-05	1.962813
08202011	20	0.007	0.000	0.001	0.001	0.001	0.000	0.001	0.001	0.005	0.000	0.005	299.896	0.785	0.1395291E-01	0.6608757	0.6212906E-05	2.026825
08202011	21	0.007	0.000	0.001	0.001	0.001	0.000	0.001	0.002	0.006	0.000	0.006	299.142	0.790	0.1454741E-01	0.6608757	0.6700401E-05	1.994019
08202011	22	0.006	0.001	0.001	0.002	0.001	0.000	0.001	0.002	0.008	0.000	0.008	298.464	0.830	0.2387160E-01	1.198407	0.1386527E-04	1.936676
08202011	23	0.005	0.001	0.001	0.002	0.001	0.001	0.002	0.002	0.012	0.000	0.011	297.969	0.870	0.3974718E-01	2.307284	0.1977559E-04	2.066972
08202011	24	0.004	0.002	0.001	0.002	0.002	0.001	0.002	0.003	0.017	0.000	0.014	297.500	0.912	0.6238979E-01	3.967157	0.3120302E-04	2.104283
08212011	01	0.003	0.002	0.001	0.002	0.002	0.001	0.002	0.003	0.020	0.000	0.015	297.254	0.931	0.8085716E-01	5.527148	0.4029330E-04	2.137268
08212011	02	0.004	0.003	0.001	0.002	0.002	0.001	0.002	0.003	0.020	0.000	0.016	297.233	0.912	0.000000	7.603519	0.3251671E-02	0.3689081
08212011	03	0.005	0.004	0.001	0.002	0.002	0.001	0.002	0.003	0.020	0.000	0.016	296.944	0.941	0.9860975E-01	6.988167	0.5016032E-04	2.144003
08212011	04	0.006	0.004	0.001	0.002	0.002	0.001	0.002	0.003	0.019	0.000	0.015	296.983	0.940	0.9092546E-01	6.441718	0.4599096E-04	2.146329
08212011	05	0.006	0.004	0.001	0.002	0.002	0.001	0.002	0.003	0.019	0.000	0.015	297.005	0.938	0.9047711E-01	6.441718	0.4529410E-04	2.152960
08212011	06	0.006	0.004	0.001	0.002	0.002	0.001	0.002	0.003	0.019	0.000	0.015	297.008	0.939	0.9046561E-01	6.441718	0.4528437E-04	2.153053
08212011	07	0.007	0.003	0.001	0.001	0.002	0.001	0.002	0.002	0.019	0.000	0.014	297.219	0.940	0.1036621	6.441718	0.3799232E-04	2.229306
08212011	08	0.004	0.002	0.001	0.002	0.002	0.001	0.002	0.002	0.019	0.000	0.013	299.007	0.882	0.4870182E-01	3.038723	0.2381212E-04	2.105893
08212011	09	0.002	0.002	0.003	0.001	0.002	0.000	0.001	0.002	0.014	0.000	0.011	300.388	0.833	0.6163120E-04	2.208717	0.2676663E-02	-0.8345358E-01
08212011	10	0.002	0.001	0.005	0.000	0.001	0.000	0.001	0.001	0.010	0.000	0.009	301.933	0.769	0.7098913E-03	1.157434	0.2278699E-02	-0.2941909
08212011	11	0.002	0.001	0.006	0.000	0.001	0.000	0.001	0.001	0.009	0.000	0.008	303.499	0.711	0.7101297E-03	0.8195214	0.2277370E-02	-0.4438733
08212011	12	0.003	0.001	0.008	0.000	0.001	0.000	0.001	0.001	0.009	0.000	0.008	305.412	0.645	0.4975200E-02	0.6961414	0.2609399E-02	-0.5738430
08212011	13	0.003	0.002	0.010	0.001	0.001	0.000	0.001	0.001	0.011	0.000	0.008	307.088	0.575	0.3217041E-02	0.5467660	0.1162930E-04	1.672248
08212011	14	0.004	0.001	0.008	0.001	0.000	0.000	0.001	0.001	0.011	0.000	0.007	305.585	0.626	0.3866851E-02	0.5426821	0.1083678E-04	1.699645
08212011	15	0.006	0.000	0.005	0.001	0.000	0.000	0.001	0.001	0.008	0.000	0.006	305.289	0.638	0.4180908E-02	0.4637237	0.7262043E-05	1.805201
08212011	16	0.008	0.000	0.004	0.001	0.000	0.000	0.001	0.001	0.008	0.000	0.006	305.408	0.624	0.4376471E-02	0.4348243	0.6260766E-05	1.841686
08212011	17	0.009	0.000	0.005	0.001	0.000	0.000	0.001	0.001	0.008	0.000	0.006	305.513	0.597	0.3703356E-02	0.4077084	0.6683859E-05	1.785322
08212011	18	0.009	0.000	0.004	0.000	0.000	0.000	0.001	0.001	0.007	0.000	0.005	305.334	0.588	-99999.00	0.4313393	0.1673683E-03	0.4111457
08212011	19	0.009	0.000	0.003	0.000	0.000	0.000	0.001	0.001	0.006	0.000	0.004	303.946	0.624	-99999.00	0.3601172	0.8023238E-04	0.6520942
08212011	20	0.010	0.000	0.002	0.001	0.000	0.000	0.001	0.001	0.005	0.000	0.004	301.995	0.723	0.5580127E-02	0.3616639	0.4022914E-05	1.953764
08212011	21	0.010	0.000	0.001	0.001	0.000	0.000	0.001	0.001	0.005	0.000	0.004	300.896	0.759	0.8860886E-02	0.4229940	0.3610911E-05	2.068717
08212011	22	0.009	0.000	0.001	0.001	0.000	0.000	0.001	0.001	0.005	0.000	0.004	300.027	0.806	0.1088607E-01	0.5287542	0.4308064E-05	2.088972
08212011	23	0.007	0.000	0.001	0.001	0.001	0.000	0.001	0.001	0.006	0.000	0.004	299.530	0.835	0.1246405E-01	0.6351506	0.5021919E-05	2.102007
08212011	24	0.006	0.000	0.001	0.001	0.001	0.000	0.001	0.001	0.006	0.000	0.005	299.238	0.840	0.1716316E-01	0.8461210	0.7212827E-05	2.069327
08222011	01	0.005	0.000	0.001	0.001	0.001	0.000	0.001	0.001	0.008	0.000	0.005	298.574	0.915	0.2854729E-01	1.626511	0.1056884E-04	2.187230
08222011	02	0.006	0.001	0.001	0.001	0.002	0.000	0.001	0.001	0.009	0.000	0.006	298.354	0.921	0.3558081E-01	2.038062	0.1354109E-04	2.177564
08222011	03	0.006	0.001	0.001	0.001	0.002	0.000	0.001	0.001	0.009	0.000	0.007	298.045	0.934	0.4692322E-01	2.797513	0.1749645E-04	2.203822
08222011	04	0.006	0.002	0.001	0.001	0.003	0.000	0.001	0.001	0.010	0.000	0.008	297.844	0.943	0.6154877E-01	3.819292	0.2294083E-04	2.221374
08222011	05	0.007	0.002	0.001	0.001	0.003	0.000	0.001	0.001	0.009	0.000	0.008	297.749	0.947	0.7073289E-01	4.624898	0.2613752E-04	2.247838
08222011	06	0.007	0.002	0.001	0.001	0.003	0.000	0.001	0.001	0.009	0.000	0.008	297.649	0.946	0.7104766E-01	4.624898	0.2632196E-04	2.244784
08222011	07	0.006	0.002	0.001	0.001	0.003	0.000	0.001	0.001	0.009	0.000	0.008	297.635	0.941	0.6212574E-01	3.819292	0.2327990E-04	2.215002
08222011	08	0.006	0.002	0.001	0.001	0.002	0.000	0.001	0.001	0.008	0.000	0.007	298.856	0.904	0.3697056E-01	1.969612	0.1488577E-04	2.121609
08222011	09	0.006	0.001	0.002	0.001	0.001	0.000	0.001	0.001	0.005	0.000	0.005	300.849	0.838	0.1195937E-01	0.8461210	0.8158134E-05	2.015842
08222011	10	0.007	0.001	0.002	0.000	0.000	0.000	0.001	0.001	0.003	0.000	0.003	302.847	0.759	-99999.00	0.4143854	0.7246851E-04	0.7572551
08222011	11	0.009	0.005	0.004	0.000	0.000	0.000	0.001	0.001	0.003	0.000	0.003	304.849	0.666	-99999.00	0.3800737	0.6362713E-04	0.7762255
08222011	12	0.010	0.017	0.009	0.000	0.000	0.000	0.001	0.002	0.006	0.000	0.005	306.116	0.609	-99999.00	0.5567237	0.1926493E-03	0.4608723
08222011	13	0.011	0.018	0.012	0.000	0.000	0.000	0.001	0.002	0.008	0.000	0.007	307.320	0.564	-99999.00	0.6314938	0.1396824E-02	-0.3447726
08222011	14	0.009	0.016	0.012	0.000	0.000	0.000	0.001	0.002	0.011	0.000	0.008	308.290	0.531	-99999.00	0.6094805	0.2023397E-02	-0.5211214
08222011	15	0.007	0.011	0.010	0.000	0.000	0.000	0.001	0.002	0.015	0.000	0.010	308.434	0.514	-99999.00	0.6434584	0.2277840E-02	-0.5490027
08222011	16	0.007	0.008	0.008	0.000	0.000	0.000	0.001	0.001	0.016	0.000	0.010	308.291	0.505	-99999.00	0.6727411	0.1989416E-02	-0.4708776
08222011	17	0.012	0.008	0.007	0.000	0.000	0.000	0.001	0.001	0.016	0.000	0.010	307.478	0.509	-99999.00	0.7041242	0.5441232E-03	0.1119520
08222011	18	0.017	0.005	0.005	0.001	0.001	0.000	0.001	0.001	0.015	0.000	0.010	306.782	0.526	0.5392969E-02	0.6271061	0.1078472E-04	1.764532
08222011	19	0.014	0.002	0.003	0.001	0.001	0.000	0.002	0.001	0.017	0.000	0.011	304.491	0.576	0.9602427E-02	0.7842638	0.1191225E-04	1.818468
08222011	20	0.007	0.001	0.003	0.001	0.001	0.000	0.002	0.001	0.021	0.000	0.013	302.996	0.601	0.1342601E-01	1.005002	0.1809611E-04	1.744582
08222011	21	0.008	0.002	0.003	0.001	0.001	0.000	0.002	0.001	0.023	0.000	0.014	302.076	0.611	0.1583207E-01	1.125081	0.2230095E-04	1.702861
08222011	22	0.017	0.003	0.004	0.001	0.001	0.000	0.002	0.002	0.022	0.000	0.015	301.316	0.635	0.1557285E-01	1.234840	0.2867499E-04	1.634108
08222011	23	0.029	0.005	0.005	0.002	0.002	0.001	0.003	0.003	0.015	0.000	0.014	299.981	0.721	0.1484925E-01	1.430610	0.2667928E-04	1.729347
08222011	24	0.029	0.007	0.004	0.003	0.002	0.001	0.004	0.006	0.007	0.000	0.014	299.104	0.785	0.1380223E-01	1.348647	0.1756306E-04	1.885298
08232011	01	0.028	0.010	0.003	0.004	0.003	0.001	0.005	0.008	0.002	0.001	0.014	298.588	0.828	0.2852339E-01	1.239235	0.4874226E-05	2.405248
08232011	02	0.026	0.012	0.003	0.004	0.003	0.002	0.006	0.009	0.001	0.001	0.015	298.182	0.866	0.1127409	1.669313	0.1367248E-05	3.086690
08232011	03	0.023	0.013	0.003	0.004	0.004	0.002	0.006	0.009	0.002	0.001	0.016	298.038	0.856	0.1209670	1.837151	0.1653167E-05	3.045828
08232011	04	0.023	0.014	0.003	0.004	0.004	0.001	0.006	0.009	0.004	0.001	0.017	297.871	0.855	0.3025323E-01	1.930702	0.1252351E-04	2.187989
08232011	05	0.022	0.015	0.002	0.004	0.004	0.001	0.006	0.008	0.005	0.001	0.017	297.711	0.845	0.2314121E-01	2.027671	0.2121469E-04	1.980361
08232011	06	0.022	0.016	0.002	0.004	0.004	0.001	0.006	0.008	0.005	0.001	0.017	297.845	0.797	0.1749814E-01	1.588101	0.1976663E-04	1.904946
08232011	07	0.023	0.014	0.002	0.004	0.004	0.001	0.007	0.008	0.004	0.001	0.017	297.788	0.821	0.2172458E-01	1.727513	0.1605323E-04	2.031859
08232011	08	0.025	0.013	0.005	0.004	0.005	0.001	0.007	0.008	0.003	0.001	0.016	300.171	0.765	0.1991302E-01	1.273595	0.6395298E-05	2.299171
08232011	09	0.026	0.019	0.010	0.003	0.004	0.001	0.007	0.008	0.003	0.001	0.016	302.353	0.655	0.4678905E-02	0.8387666	0.9836308E-05	1.930809
08232011	10	0.029	0.042	0.012	0.002	0.004	0.001	0.005	0.006	0.008	0.001	0.015	303.806	0.597	0.4243672E-02	0.8056936	0.1354393E-04	1.774425
08232011	11	0.026	0.055	0.012	0.001	0.003	0.001	0.004	0.004	0.015	0.001	0.015	305.665	0.505	0.3919363E-02	0.7520558	0.1417133E-04	1.724839
08232011	12	0.017	0.088	0.015	0.001	0.002	0.000	0.002	0.002	0.026	0.001	0.018	307.079	0.449	0.4269063E-02	0.8841231	0.2833996E-04	1.494114
08232011	13	0.010	0.095	0.018	0.000	0.001	0.000	0.002	0.002	0.032	0.001	0.020	308.486	0.397	-99999.00	0.9371598	0.7182616E-02	-0.8844690
08232011	14	0.003	0.063	0.018	0.000	0.001	0.000	0.002	0.002	0.035	0.000	0.027	307.858	0.409	0.3165007E-04	0.9407083	0.4106740E-02	-0.6400422
08232011	15	0.001	0.034	0.015	0.000	0.001	0.000	0.002	0.002	0.038	0.000	0.032	306.847	0.448	0.2211332E-04	1.231780	0.2113540E-02	-0.2344774
08232011	16	0.001	0.025	0.014	0.000	0.001	0.000	0.002	0.002	0.041	0.000	0.034	307.216	0.427	0.1937151E-04	1.214592	0.2127883E-02	-0.2435172
08232011	17	0.003	0.021	0.012	0.001	0.001	0.000	0.002	0.002	0.046	0.000	0.033	307.561	0.376	0.000000	1.078208	0.5314745E-02	-0.6927800
08232011	18	0.009	0.022	0.010	0.001	0.001	0.000	0.002	0.003	0.051	0.000	0.031	306.847	0.395	0.8349359E-02	1.312822	0.3810473E-04	1.537227
08232011	19	0.019	0.026	0.008	0.001	0.001	0.001	0.003	0.004	0.046	0.000	0.030	304.390	0.481	0.1266658E-01	1.586855	0.4393130E-04	1.557763
08232011	20	0.022	0.034	0.008	0.001	0.002	0.001	0.004	0.005	0.041	0.001	0.029	302.856	0.460	0.1138961E-01	1.378220	0.4800543E-04	1.458028
08232011	21	0.024	0.041	0.008	0.002	0.002	0.001	0.004	0.006	0.035	0.001	0.028	301.571	0.495	0.1234549E-01	1.420367	0.5364861E-04	1.422842
08232011	22	0.025	0.047	0.008	0.002	0.002	0.001	0.005	0.007	0.030	0.001	0.027	300.511	0.548	0.1313448E-01	1.472051	0.5360418E-04	1.438724
08232011	23	0.023	0.043	0.006	0.002	0.002	0.001	0.005	0.008	0.025	0.001	0.026	299.585	0.622	0.1651794E-01	1.640152	0.4944418E-04	1.520769
08232011	24	0.018	0.026	0.003	0.004	0.003	0.002	0.006	0.009	0.020	0.001	0.025	298.733	0.696	0.2278596E-01	1.960978	0.3787060E-04	1.714171
08242011	01	0.015	0.017	0.002	0.004	0.003	0.002	0.006	0.009	0.018	0.001	0.024	298.084	0.760	0.2713901E-01	2.263880	0.3421752E-04	1.820605
08242011	02	0.008	0.013	0.002	0.004	0.003	0.002	0.006	0.009	0.020	0.001	0.023	297.644	0.801	0.2871799E-01	2.475942	0.3480736E-04	1.852069
08242011	03	0.005	0.010	0.002	0.004	0.003	0.002	0.005	0.009	0.022	0.001	0.023	297.348	0.804	0.000000	6.260215	0.4140484E-02	0.1795381
08242011	04	0.006	0.010	0.002	0.004	0.002	0.001	0.005	0.008	0.022	0.001	0.022	297.112	0.786	0.2960694E-01	2.321511	0.4101804E-04	1.752796
08242011	05	0.008	0.013	0.002	0.004	0.002	0.001	0.004	0.008	0.021	0.001	0.022	296.944	0.769	0.000000	4.861338	0.3878656E-02	0.9807456E-01
08242011	06	0.008	0.017	0.003	0.004	0.002	0.001	0.004	0.007	0.022	0.001	0.022	296.673	0.761	0.2792990E-01	2.214548	0.5411540E-04	1.611964
08242011	07	0.010	0.019	0.003	0.003	0.002	0.001	0.004	0.007	0.021	0.001	0.022	296.552	0.759	0.2902824E-01	2.214548	0.5307104E-04	1.620427
08242011	08	0.011	0.018	0.004	0.003	0.003	0.001	0.004	0.007	0.019	0.001	0.021	298.208	0.707	0.1987576E-01	1.749685	0.4319784E-04	1.607498
08242011	09	0.017	0.026	0.009	0.002	0.003	0.001	0.004	0.007	0.020	0.002	0.021	300.646	0.629	0.1003706E-01	1.354866	0.4216926E-04	1.506900
08242011	10	0.022	0.034	0.013	0.001	0.003	0.001	0.003	0.005	0.022	0.001	0.020	303.135	0.550	0.7062197E-02	1.163637	0.3815767E-04	1.484236
08242011	11	0.017	0.039	0.018	0.000	0.002	0.001	0.002	0.003	0.026	0.001	0.019	305.841	0.458	-99999.00	1.230419	0.1748709E-02	-0.1526646
08242011	12	0.012	0.042	0.024	0.000	0.001	0.000	0.002	0.003	0.031	0.001	0.020	307.836	0.401	-99999.00	0.9305690	0.9792296E-02	-1.022136
08242011	13	0.007	0.040	0.026	0.000	0.001	0.000	0.001	0.002	0.033	0.001	0.020	309.495	0.367	-99999.00	0.8332188	0.1789976E-01	-1.332088
08242011	14	0.006	0.032	0.022	0.000	0.001	0.000	0.001	0.002	0.029	0.000	0.018	310.391	0.350	-99999.00	0.6843187	0.1415879E-01	-1.315768
08242011	15	0.006	0.026	0.019	0.000	0.001	0.000	0.001	0.002	0.026	0.000	0.016	310.028	0.355	-99999.00	0.6356958	0.1029747E-01	-1.209481
08242011	16	0.006	0.022	0.017	0.000	0.001	0.000	0.001	0.002	0.024	0.000	0.015	309.179	0.369	-99999.00	0.6162672	0.8719384E-02	-1.150717
08242011	17	0.006	0.020	0.016	0.000	0.001	0.000	0.001	0.002	0.023	0.000	0.014	308.024	0.388	-99999.00	0.6276250	0.7059212E-02	-1.051056
08242011	18	0.008	0.019	0.014	0.000	0.001	0.000	0.001	0.002	0.022	0.000	0.014	307.018	0.397	-99999.00	0.6596616	0.4575584E-02	-0.8411254
08242011	19	0.011	0.019	0.013	0.000	0.001	0.000	0.001	0.002	0.022	0.000	0.014	305.789	0.412	-99999.00	0.7134110	0.1963333E-02	-0.4396542
08242011	20	0.015	0.018	0.011	0.000	0.001	0.000	0.002	0.003	0.020	0.000	0.014	303.943	0.460	-99999.00	0.7858061	0.3503163E-03	0.3508550
08242011	21	0.018	0.016	0.009	0.000	0.001	0.001	0.002	0.003	0.019	0.000	0.014	302.533	0.513	-99999.00	0.9576198	0.1572195E-03	0.7846869
08242011	22	0.020	0.015	0.008	0.000	0.001	0.001	0.002	0.004	0.018	0.000	0.015	301.438	0.567	-99999.00	1.137938	0.1384367E-03	0.9148670
08242011	23	0.022	0.014	0.008	0.000	0.001	0.001	0.003	0.005	0.017	0.000	0.015	300.520	0.625	-99999.00	1.277958	0.7845113E-04	1.211917
08242011	24	0.023	0.014	0.008	0.000	0.001	0.001	0.003	0.006	0.016	0.000	0.016	299.684	0.691	-99999.00	1.582915	0.7810535E-04	1.306777
08252011	01	0.022	0.013	0.007	0.000	0.001	0.001	0.003	0.006	0.015	0.000	0.016	298.916	0.765	-99999.00	2.097919	0.7960290E-04	1.420860
08252011	02	0.019	0.012	0.006	0.001	0.001	0.001	0.003	0.006	0.014	0.000	0.016	298.360	0.814	0.1830477E-01	1.824094	0.3388859E-04	1.730994
08252011	03	0.016	0.011	0.005	0.001	0.001	0.001	0.004	0.006	0.014	0.000	0.016	297.963	0.834	0.2121753E-01	1.998548	0.3031779E-04	1.819017
08252011	04	0.014	0.010	0.005	0.001	0.001	0.001	0.004	0.006	0.014	0.001	0.016	297.639	0.837	0.2063584E-01	2.110906	0.3474811E-04	1.783538
08252011	05	0.013	0.010	0.004	0.001	0.001	0.001	0.004	0.006	0.014	0.001	0.016	297.249	0.847	0.2385116E-01	2.232959	0.3370307E-04	1.821211
08252011	06	0.013	0.009	0.004	0.001	0.001	0.001	0.004	0.006	0.013	0.001	0.016	296.915	0.854	0.2440131E-01	2.232959	0.3547002E-04	1.799019
08252011	07	0.014	0.009	0.003	0.001	0.002	0.001	0.005	0.007	0.011	0.000	0.016	296.703	0.862	0.2829200E-01	2.137713	0.2386962E-04	1.952104
08252011	08	0.014	0.010	0.005	0.001	0.002	0.001	0.005	0.007	0.011	0.001	0.016	298.183	0.811	0.1565135E-01	1.637723	0.2464945E-04	1.822433
08252011	09	0.021	0.021	0.009	0.000	0.003	0.001	0.004	0.005	0.014	0.001	0.017	300.472	0.719	-99999.00	2.152741	0.1611311E-03	1.125813
08252011	10	0.032	0.029	0.011	0.000	0.004	0.001	0.004	0.004	0.015	0.001	0.016	302.962	0.616	-99999.00	1.605566	0.7917009E-04	1.307067
08252011	11	0.040	0.028	0.013	0.000	0.003	0.001	0.003	0.004	0.015	0.000	0.015	305.559	0.506	-99999.00	1.069451	0.5306572E-04	1.304347
08252011	12	0.037	0.019	0.014	0.000	0.002	0.001	0.002	0.003	0.016	0.000	0.013	307.463	0.436	-99999.00	0.8014380	0.4803423E-04	1.222319
08252011	13	0.026	0.013	0.014	0.000	0.001	0.000	0.002	0.002	0.019	0.000	0.014	308.982	0.394	-99999.00	0.6858521	0.1850901E-03	0.5688474
08252011	14	0.017	0.008	0.014	0.000	0.001	0.000	0.002	0.002	0.023	0.000	0.015	308.542	0.409	-99999.00	0.7791806	0.5847396E-03	0.1246756
08252011	15	0.010	0.004	0.012	0.000	0.001	0.000	0.001	0.002	0.025	0.000	0.015	307.529	0.444	-99999.00	0.8348825	0.1681175E-02	-0.3039875
08252011	16	0.008	0.002	0.009	0.000	0.001	0.000	0.001	0.002	0.025	0.000	0.015	307.417	0.448	-99999.00	0.8191735	0.1553575E-02	-0.2779562
08252011	17	0.009	0.001	0.007	0.000	0.001	0.000	0.001	0.002	0.026	0.000	0.015	307.741	0.413	-99999.00	0.7051598	0.8541122E-03	-0.8322736E-01
08252011	18	0.013	0.002	0.007	0.000	0.001	0.000	0.001	0.002	0.027	0.000	0.016	307.068	0.420	-99999.00	0.7866332	0.6314328E-03	0.9544510E-01
08252011	19	0.017	0.002	0.007	0.000	0.001	0.000	0.002	0.002	0.028	0.000	0.017	305.066	0.497	-99999.00	1.071920	0.4115236E-03	0.4157676
08252011	20	0.017	0.002	0.007	0.001	0.001	0.000	0.002	0.002	0.029	0.000	0.018	303.330	0.526	0.9996951E-02	1.095604	0.3358322E-04	1.513531
08252011	21	0.016	0.003	0.008	0.001	0.001	0.001	0.003	0.002	0.030	0.000	0.020	302.092	0.551	0.1187915E-01	1.349729	0.4027368E-04	1.525225
08252011	22	0.016	0.003	0.009	0.001	0.001	0.001	0.003	0.003	0.031	0.001	0.021	301.148	0.584	0.1213217E-01	1.474195	0.5199132E-04	1.452624
08252011	23	0.017	0.004	0.010	0.001	0.002	0.001	0.004	0.004	0.030	0.001	0.022	300.366	0.627	0.1344711E-01	1.711279	0.5978912E-04	1.456699
08252011	24	0.018	0.005	0.011	0.001	0.002	0.001	0.004	0.005	0.029	0.001	0.023	299.664	0.682	0.1519352E-01	2.005023	0.7103570E-04	1.450643
08262011	01	0.018	0.007	0.012	0.001	0.002	0.001	0.004	0.006	0.028	0.001	0.024	299.047	0.742	0.1769888E-01	2.460603	0.8411556E-04	1.466165
08262011	02	0.021	0.009	0.012	0.001	0.002	0.001	0.005	0.007	0.027	0.001	0.025	298.608	0.787	0.2134514E-01	2.977249	0.9384617E-04	1.501399
08262011	03	0.022	0.011	0.012	0.001	0.003	0.002	0.006	0.008	0.025	0.001	0.026	298.310	0.811	0.2243632E-01	3.303589	0.8560275E-04	1.586498
08262011	04	0.024	0.014	0.013	0.001	0.003	0.002	0.007	0.009	0.024	0.002	0.027	298.023	0.829	0.2684319E-01	3.639826	0.7611978E-04	1.679583
08262011	05	0.026	0.015	0.014	0.001	0.003	0.002	0.007	0.010	0.023	0.002	0.028	297.732	0.844	0.3276783E-01	3.861175	0.7009063E-04	1.741059
08262011	06	0.027	0.016	0.014	0.001	0.003	0.002	0.007	0.010	0.024	0.002	0.028	297.438	0.860	0.4404300E-01	4.374741	0.6255809E-04	1.844669
08262011	07	0.027	0.016	0.014	0.001	0.003	0.002	0.008	0.010	0.024	0.002	0.028	297.250	0.883	0.5911225E-01	5.064922	0.5459886E-04	1.967389
08262011	08	0.021	0.014	0.013	0.000	0.003	0.002	0.007	0.009	0.025	0.002	0.027	298.890	0.833	-99999.00	5.381068	0.2240961E-03	1.380434
08262011	09	0.013	0.020	0.017	0.000	0.002	0.001	0.005	0.006	0.031	0.001	0.025	301.473	0.731	-99999.00	3.352904	0.2033914E-02	0.2170885
08262011	10	0.009	0.021	0.018	0.000	0.002	0.001	0.003	0.004	0.035	0.001	0.024	303.751	0.649	-99999.00	2.477979	0.4963177E-02	-0.3016621
08262011	11	0.009	0.023	0.018	0.000	0.001	0.001	0.002	0.003	0.034	0.000	0.022	306.620	0.522	-99999.00	1.542648	0.5241426E-02	-0.5311826
08262011	12	0.013	0.025	0.014	0.000	0.001	0.000	0.002	0.003	0.027	0.000	0.018	308.414	0.468	-99999.00	1.051469	0.1664702E-02	-0.1995400
08262011	13	0.012	0.010	0.009	0.000	0.001	0.000	0.001	0.002	0.019	0.000	0.014	307.938	0.473	-99999.00	0.8169513	0.1461264E-02	-0.2525326
08262011	14	0.009	0.002	0.006	0.000	0.001	0.000	0.001	0.002	0.014	0.000	0.010	306.552	0.517	-99999.00	0.6549878	0.5809406E-03	0.5210147E-01
08262011	15	0.010	0.000	0.005	0.001	0.001	0.000	0.001	0.002	0.009	0.000	0.007	305.697	0.536	0.3193080E-02	0.3567435	0.6419623E-05	1.744847
08262011	16	0.013	0.000	0.003	0.001	0.001	0.000	0.001	0.002	0.006	0.000	0.006	305.643	0.537	0.3215194E-02	0.2845935	0.3861668E-05	1.867450
08262011	17	0.017	0.000	0.002	0.002	0.001	0.000	0.002	0.002	0.004	0.000	0.005	305.797	0.555	0.2380192E-02	0.2033465	0.1447002E-05	2.147768
08262011	18	0.022	0.001	0.002	0.003	0.001	0.000	0.002	0.003	0.003	0.000	0.006	305.230	0.597	0.2644122E-02	0.2337934	0.1798676E-05	2.113879
08262011	19	0.019	0.001	0.003	0.003	0.001	0.001	0.003	0.004	0.005	0.001	0.009	302.812	0.689	0.5147874E-02	0.6015970	0.4535028E-05	2.122726
08262011	20	0.013	0.002	0.005	0.004	0.002	0.001	0.004	0.005	0.016	0.001	0.017	301.329	0.696	0.1234531E-01	1.441843	0.2636064E-04	1.737962
08262011	21	0.011	0.003	0.004	0.005	0.002	0.001	0.004	0.006	0.024	0.001	0.022	300.510	0.707	0.1902181E-01	1.973372	0.4131263E-04	1.679126
08262011	22	0.009	0.004	0.003	0.007	0.002	0.001	0.005	0.006	0.028	0.001	0.025	299.916	0.730	0.2517480E-01	2.490559	0.5197141E-04	1.680532
08262011	23	0.006	0.006	0.003	0.007	0.003	0.001	0.005	0.005	0.038	0.001	0.029	299.477	0.748	0.3475982E-01	3.392147	0.7543292E-04	1.652914
08262011	24	0.005	0.008	0.003	0.006	0.003	0.001	0.005	0.005	0.049	0.001	0.034	299.183	0.758	0.000000	5.982817	0.4987845E-02	0.7899278E-01
08272011	01	0.005	0.007	0.003	0.006	0.003	0.001	0.004	0.004	0.052	0.001	0.035	298.951	0.764	0.000000	5.704543	0.4604323E-02	0.9305511E-01
08272011	02	0.005	0.006	0.003	0.006	0.002	0.001	0.004	0.004	0.050	0.001	0.035	298.698	0.769	0.000000	5.011940	0.4218102E-02	0.7488886E-01
08272011	03	0.004	0.006	0.003	0.005	0.002	0.001	0.004	0.004	0.048	0.001	0.034	298.285	0.781	0.000000	4.749498	0.3996516E-02	0.7496616E-01
08272011	04	0.004	0.005	0.003	0.005	0.002	0.001	0.004	0.004	0.045	0.001	0.031	297.814	0.790	0.000000	5.447009	0.4162088E-02	0.1168469
08272011	05	0.005	0.006	0.004	0.005	0.002	0.001	0.004	0.004	0.040	0.001	0.029	297.748	0.736	0.000000	4.205570	0.3957197E-02	0.2643715E-01
08272011	06	0.007	0.010	0.006	0.004	0.003	0.001	0.004	0.004	0.034	0.002	0.025	296.969	0.752	0.2879179E-01	2.985819	0.1062100E-03	1.448898
08272011	07	0.007	0.011	0.006	0.004	0.003	0.001	0.004	0.004	0.031	0.002	0.024	296.146	0.776	0.3108084E-01	3.195843	0.1123581E-03	1.453981
08272011	08	0.007	0.014	0.008	0.004	0.003	0.001	0.004	0.005	0.031	0.003	0.024	297.161	0.733	0.2099603E-01	2.520170	0.1012808E-03	1.395903
08272011	09	0.009	0.022	0.013	0.003	0.003	0.001	0.004	0.005	0.034	0.003	0.026	299.126	0.666	0.1536244E-01	2.276142	0.1074092E-03	1.326158
08272011	10	0.011	0.050	0.021	0.002	0.003	0.001	0.003	0.005	0.044	0.004	0.030	301.466	0.584	0.1064128E-01	2.077141	0.1219215E-03	1.231386
08272011	11	0.008	0.067	0.030	0.002	0.002	0.001	0.003	0.005	0.054	0.003	0.035	303.831	0.483	0.7560611E-02	1.848273	0.1151933E-03	1.205339
08272011	12	0.006	0.075	0.038	0.001	0.002	0.001	0.002	0.004	0.061	0.002	0.038	306.247	0.409	0.5601525E-02	1.716759	0.9874233E-04	1.240206
08272011	13	0.007	0.077	0.034	0.001	0.002	0.001	0.002	0.004	0.057	0.001	0.035	308.220	0.354	0.3919482E-02	1.291852	0.5373162E-04	1.380983
08272011	14	0.009	0.081	0.028	0.001	0.001	0.001	0.002	0.004	0.050	0.001	0.031	309.144	0.328	0.3212273E-02	1.036482	0.3262051E-04	1.502071
08272011	15	0.018	0.082	0.024	0.001	0.001	0.001	0.002	0.004	0.041	0.001	0.027	308.860	0.326	0.3008008E-02	0.8874512	0.2619026E-04	1.530005
08272011	16	0.028	0.073	0.020	0.001	0.001	0.001	0.002	0.004	0.030	0.001	0.021	308.249	0.331	0.2532601E-02	0.6639042	0.1814506E-04	1.563347
08272011	17	0.035	0.067	0.018	0.001	0.001	0.001	0.002	0.004	0.024	0.001	0.018	307.237	0.343	0.2441645E-02	0.5714377	0.1621614E-04	1.547021
08272011	18	0.045	0.069	0.016	0.002	0.001	0.001	0.002	0.004	0.022	0.001	0.018	306.044	0.365	0.3087521E-02	0.6309253	0.2012930E-04	1.496149
08272011	19	0.052	0.078	0.011	0.003	0.002	0.001	0.003	0.006	0.024	0.002	0.021	304.411	0.402	0.4500687E-02	0.7400902	0.2461082E-04	1.478159
08272011	20	0.054	0.089	0.007	0.004	0.002	0.001	0.003	0.007	0.027	0.002	0.025	303.147	0.407	0.7228792E-02	0.9105459	0.3235546E-04	1.449354
08272011	21	0.058	0.101	0.008	0.004	0.002	0.001	0.004	0.008	0.030	0.002	0.027	302.046	0.420	0.7829130E-02	0.9692257	0.3987414E-04	1.385734
08272011	22	0.055	0.108	0.009	0.004	0.002	0.001	0.004	0.008	0.030	0.002	0.028	300.830	0.455	0.9493709E-02	1.149125	0.5526406E-04	1.317924
08272011	23	0.048	0.116	0.010	0.003	0.002	0.001	0.005	0.009	0.029	0.002	0.028	299.803	0.485	0.9725571E-02	1.170251	0.5873368E-04	1.299392
08272011	24	0.038	0.117	0.007	0.003	0.002	0.001	0.005	0.009	0.028	0.002	0.028	298.859	0.519	0.1335657E-01	1.278902	0.6499185E-04	1.293978
08282011	01	0.028	0.111	0.006	0.003	0.002	0.001	0.006	0.010	0.028	0.002	0.029	297.910	0.557	0.1524013E-01	1.418369	0.6120335E-04	1.365014
08282011	02	0.022	0.100	0.005	0.002	0.002	0.001	0.006	0.010	0.028	0.002	0.029	297.020	0.599	0.1884329E-01	1.605441	0.6266990E-04	1.408535
08282011	03	0.021	0.092	0.005	0.002	0.003	0.001	0.006	0.010	0.027	0.002	0.030	296.452	0.619	0.2200174E-01	1.820408	0.7724756E-04	1.372284
08282011	04	0.022	0.094	0.006	0.002	0.003	0.001	0.007	0.011	0.027	0.002	0.030	295.748	0.648	0.2149743E-01	1.884846	0.8050991E-04	1.369427
08282011	05	0.027	0.110	0.009	0.002	0.003	0.002	0.007	0.012	0.027	0.003	0.031	295.077	0.676	0.2802539E-01	2.158897	0.6911579E-04	1.494655
08282011	06	0.027	0.124	0.012	0.002	0.003	0.002	0.007	0.012	0.029	0.004	0.033	294.275	0.711	0.3820503E-01	2.641245	0.8267924E-04	1.504412
08282011	07	0.027	0.140	0.012	0.002	0.003	0.002	0.008	0.013	0.033	0.005	0.034	293.441	0.752	0.6567109E-01	3.070004	0.5909615E-04	1.715580
08282011	08	0.025	0.150	0.012	0.002	0.003	0.002	0.008	0.013	0.035	0.007	0.035	294.353	0.737	0.4960281E-01	3.078942	0.7434869E-04	1.617128
08282011	09	0.026	0.166	0.018	0.002	0.003	0.002	0.008	0.014	0.038	0.008	0.037	296.923	0.655	0.2091271E-01	2.421909	0.9865440E-04	1.390041
08282011	10	0.031	0.164	0.019	0.002	0.003	0.002	0.009	0.014	0.037	0.007	0.037	300.047	0.556	0.9030700E-02	1.738730	0.8558717E-04	1.307823
08282011	11	0.050	0.172	0.041	0.001	0.003	0.002	0.009	0.015	0.039	0.005	0.040	303.369	0.451	0.4563332E-02	1.357989	0.7146894E-04	1.278779
08282011	12	0.074	0.169	0.058	0.001	0.003	0.002	0.010	0.016	0.040	0.004	0.043	305.405	0.396	0.3173411E-02	1.242344	0.5934880E-04	1.320830
08282011	13	0.084	0.131	0.055	0.000	0.003	0.002	0.009	0.015	0.036	0.002	0.040	307.465	0.349	-99999.00	1.480558	0.3374015E-04	1.642278
08282011	14	0.079	0.106	0.047	0.000	0.002	0.001	0.008	0.013	0.032	0.001	0.036	308.646	0.324	-99999.00	1.108869	0.2788995E-04	1.599433
08282011	15	0.068	0.081	0.038	0.000	0.002	0.001	0.007	0.011	0.027	0.001	0.031	308.538	0.320	-99999.00	0.9552229	0.2886166E-04	1.519783
08282011	16	0.065	0.069	0.033	0.000	0.002	0.001	0.006	0.010	0.024	0.001	0.027	307.887	0.326	-99999.00	0.8683458	0.2266930E-04	1.583255
08282011	17	0.068	0.067	0.030	0.000	0.002	0.001	0.006	0.010	0.023	0.001	0.026	306.878	0.336	-99999.00	0.8469989	0.1870497E-04	1.655926
08282011	18	0.072	0.070	0.024	0.001	0.002	0.001	0.006	0.010	0.022	0.001	0.026	305.583	0.363	0.2575278E-02	0.6432837	0.2032145E-04	1.500448
08282011	19	0.061	0.066	0.013	0.001	0.002	0.001	0.007	0.011	0.021	0.001	0.027	303.370	0.421	0.4632115E-02	0.7570530	0.2200108E-04	1.536682
08282011	20	0.050	0.059	0.008	0.002	0.002	0.001	0.007	0.012	0.022	0.002	0.028	302.626	0.374	0.4936576E-02	0.6465868	0.1900071E-04	1.531857
08282011	21	0.050	0.057	0.006	0.004	0.002	0.001	0.007	0.012	0.031	0.002	0.034	301.113	0.432	0.1028180E-01	1.094726	0.4145910E-04	1.421686
08282011	22	0.046	0.053	0.005	0.004	0.002	0.002	0.007	0.012	0.044	0.002	0.041	299.698	0.499	0.1954281E-01	1.860924	0.7062352E-04	1.420779
08282011	23	0.042	0.046	0.005	0.003	0.003	0.002	0.008	0.013	0.049	0.002	0.044	299.334	0.507	0.2204877E-01	2.044996	0.7843961E-04	1.416157
08282011	24	0.043	0.046	0.006	0.003	0.003	0.002	0.008	0.014	0.046	0.002	0.044	298.188	0.569	0.2479732E-01	2.365887	0.9833612E-04	1.381281
08292011	01	0.042	0.054	0.008	0.003	0.003	0.002	0.008	0.015	0.042	0.003	0.043	296.999	0.633	0.2699721E-01	2.657753	0.1119280E-03	1.375576
08292011	02	0.036	0.063	0.010	0.002	0.003	0.002	0.008	0.015	0.039	0.003	0.042	295.857	0.690	0.3742391E-01	3.123034	0.1085523E-03	1.458938
08292011	03	0.030	0.071	0.011	0.002	0.003	0.002	0.007	0.014	0.040	0.004	0.041	294.891	0.732	0.4634625E-01	3.605873	0.1223992E-03	1.469232
08292011	04	0.022	0.074	0.010	0.002	0.003	0.002	0.007	0.014	0.042	0.004	0.041	294.117	0.764	0.5119395E-01	4.020854	0.1393698E-03	1.460150
08292011	05	0.011	0.075	0.010	0.002	0.003	0.002	0.007	0.013	0.049	0.004	0.041	293.509	0.787	0.5328035E-01	4.689976	0.1807840E-03	1.414011
08292011	06	0.004	0.076	0.011	0.002	0.004	0.002	0.007	0.013	0.055	0.004	0.041	292.938	0.808	0.6838048E-01	5.175667	0.1669445E-03	1.491394
08292011	07	0.004	0.079	0.013	0.001	0.004	0.002	0.007	0.013	0.056	0.004	0.042	292.425	0.829	0.8287728E-01	5.950787	0.1770173E-03	1.526559
08292011	08	0.007	0.080	0.016	0.001	0.004	0.002	0.007	0.012	0.055	0.004	0.042	293.581	0.785	0.5280405E-01	5.054147	0.2134545E-03	1.374343
08292011	09	0.013	0.088	0.023	0.001	0.003	0.001	0.005	0.010	0.053	0.004	0.041	296.340	0.673	0.2096808E-01	3.318037	0.2839560E-03	1.067630
08292011	10	0.014	0.093	0.029	0.001	0.003	0.001	0.005	0.009	0.054	0.004	0.041	299.575	0.549	0.1223755E-01	2.381233	0.2085451E-03	1.057602
08292011	11	0.012	0.128	0.038	0.000	0.002	0.001	0.004	0.008	0.061	0.002	0.043	303.275	0.417	-99999.00	1.929831	0.2496322E-01	-1.111781
08292011	12	0.007	0.123	0.044	0.000	0.002	0.001	0.004	0.007	0.067	0.001	0.044	305.459	0.347	-99999.00	1.565735	0.3295991E-01	-1.323268
08292011	13	0.007	0.092	0.042	0.000	0.002	0.001	0.004	0.006	0.063	0.001	0.042	307.615	0.293	0.4400492E-02	1.542329	0.8067419E-02	-0.7185576
08292011	14	0.009	0.069	0.039	0.000	0.001	0.001	0.004	0.006	0.058	0.001	0.039	308.932	0.262	-99999.00	0.9527135	0.3087341E-01	-1.510622
08292011	15	0.021	0.048	0.034	0.000	0.001	0.001	0.004	0.006	0.046	0.001	0.032	308.870	0.257	-99999.00	0.8213412	0.1025192E-01	-1.096281
08292011	16	0.036	0.036	0.029	0.000	0.001	0.001	0.004	0.006	0.036	0.001	0.027	308.317	0.262	-99999.00	0.7184770	0.1578936E-03	0.6580484
08292011	17	0.049	0.031	0.026	0.000	0.001	0.001	0.004	0.006	0.032	0.001	0.025	307.368	0.271	-99999.00	0.6852362	0.4711295E-04	1.162700
08292011	18	0.056	0.029	0.019	0.001	0.001	0.001	0.004	0.006	0.029	0.001	0.024	305.983	0.310	0.2815545E-02	0.6224831	0.2136339E-04	1.464457
08292011	19	0.049	0.026	0.009	0.001	0.001	0.001	0.004	0.006	0.028	0.001	0.023	303.474	0.352	0.5183399E-02	0.6777357	0.2320783E-04	1.465426
08292011	20	0.040	0.025	0.006	0.002	0.002	0.001	0.004	0.007	0.026	0.001	0.024	301.795	0.362	0.7238030E-02	0.7195185	0.2647467E-04	1.434211
08292011	21	0.042	0.029	0.005	0.003	0.002	0.001	0.005	0.007	0.025	0.001	0.024	300.772	0.374	0.8219779E-02	0.7252580	0.2678789E-04	1.432554
08292011	22	0.045	0.034	0.004	0.004	0.002	0.001	0.005	0.009	0.026	0.001	0.027	299.782	0.411	0.1116860E-01	0.8713738	0.3310726E-04	1.420281
08292011	23	0.047	0.037	0.004	0.004	0.002	0.002	0.006	0.010	0.026	0.001	0.029	298.782	0.457	0.1462650E-01	1.101403	0.3932659E-04	1.447260
08292011	24	0.043	0.039	0.005	0.004	0.003	0.002	0.006	0.011	0.027	0.002	0.030	297.727	0.512	0.1452351E-01	1.294921	0.5062870E-04	1.407846
08302011	01	0.030	0.037	0.004	0.004	0.003	0.002	0.006	0.011	0.028	0.002	0.031	296.581	0.577	0.2069056E-01	1.672194	0.6403761E-04	1.416851
08302011	02	0.019	0.035	0.003	0.004	0.003	0.002	0.006	0.011	0.029	0.002	0.032	295.613	0.628	0.2781123E-01	2.038177	0.7452992E-04	1.436911
08302011	03	0.015	0.035	0.004	0.003	0.003	0.002	0.006	0.011	0.031	0.002	0.033	295.014	0.646	0.2995211E-01	2.266949	0.9160025E-04	1.393545
08302011	04	0.010	0.038	0.003	0.003	0.003	0.002	0.006	0.011	0.036	0.002	0.034	294.501	0.654	0.7837415E-03	4.950844	0.4101588E-02	0.8172718E-01
08302011	05	0.009	0.040	0.003	0.003	0.003	0.002	0.006	0.012	0.036	0.002	0.034	294.120	0.655	0.8586049E-03	5.211333	0.4068110E-02	0.1075562
08302011	06	0.009	0.042	0.003	0.003	0.004	0.002	0.006	0.012	0.035	0.002	0.034	293.683	0.664	0.9212494E-03	5.229303	0.3944497E-02	0.1224522
08302011	07	0.015	0.044	0.004	0.002	0.004	0.002	0.007	0.012	0.029	0.002	0.034	293.363	0.680	0.3561234E-01	2.495605	0.1055125E-03	1.373872
08302011	08	0.011	0.042	0.007	0.002	0.004	0.002	0.007	0.013	0.029	0.002	0.033	295.156	0.671	0.7891655E-03	5.379329	0.4274398E-02	0.9985316E-01
08302011	09	0.018	0.059	0.016	0.001	0.004	0.002	0.007	0.013	0.023	0.002	0.032	298.174	0.587	0.1112485E-01	1.636502	0.7779495E-04	1.322965
08302011	10	0.020	0.114	0.027	0.001	0.004	0.002	0.005	0.010	0.028	0.002	0.030	301.113	0.477	0.6202102E-02	1.288275	0.7460185E-04	1.237259
08302011	11	0.016	0.124	0.029	0.000	0.003	0.001	0.004	0.007	0.036	0.001	0.029	303.664	0.394	-99999.00	1.229653	0.9853965E-02	-0.9038286
08302011	12	0.027	0.098	0.026	0.000	0.002	0.001	0.003	0.005	0.042	0.001	0.029	305.828	0.332	-99999.00	1.108587	0.9946891E-03	0.4708241E-01
08302011	13	0.033	0.077	0.025	0.000	0.001	0.001	0.003	0.005	0.044	0.001	0.029	307.784	0.291	-99999.00	0.9162151	0.2866692E-03	0.5046164
08302011	14	0.028	0.072	0.024	0.000	0.001	0.001	0.003	0.005	0.045	0.001	0.030	308.913	0.270	-99999.00	0.8541102	0.5833743E-03	0.1655666
08302011	15	0.022	0.067	0.024	0.000	0.001	0.001	0.003	0.004	0.046	0.001	0.030	308.927	0.267	-99999.00	0.8676590	0.2373808E-02	-0.4370964
08302011	16	0.019	0.065	0.023	0.000	0.001	0.001	0.003	0.004	0.047	0.001	0.030	308.477	0.271	-99999.00	0.8595928	0.3009336E-02	-0.5441779
08302011	17	0.018	0.064	0.022	0.000	0.001	0.001	0.003	0.004	0.048	0.001	0.030	307.594	0.282	-99999.00	0.8992132	0.2565535E-02	-0.4553152
08302011	18	0.022	0.057	0.017	0.000	0.001	0.001	0.003	0.004	0.046	0.001	0.030	305.892	0.295	-99999.00	0.9712701	0.8921972E-03	0.3687916E-01
08302011	19	0.028	0.042	0.011	0.000	0.001	0.001	0.003	0.006	0.042	0.000	0.030	304.102	0.342	-99999.00	1.023496	0.3483938E-03	0.4680156
08302011	20	0.033	0.038	0.011	0.000	0.001	0.001	0.004	0.006	0.039	0.000	0.029	302.552	0.328	-99999.00	0.9335790	0.2197407E-03	0.6282406
08302011	21	0.035	0.040	0.012	0.000	0.001	0.001	0.004	0.007	0.039	0.000	0.030	301.277	0.349	-99999.00	1.017934	0.1910985E-03	0.7264624
08302011	22	0.033	0.044	0.012	0.000	0.001	0.001	0.004	0.008	0.039	0.001	0.031	300.258	0.389	-99999.00	1.192807	0.2029233E-03	0.7692383
08302011	23	0.030	0.051	0.010	0.001	0.002	0.001	0.005	0.009	0.039	0.001	0.032	299.412	0.434	0.1127923E-01	1.187791	0.7028675E-04	1.227866
08302011	24	0.026	0.058	0.009	0.001	0.002	0.002	0.005	0.009	0.040	0.001	0.034	298.793	0.481	0.1606154E-01	1.555234	0.8532750E-04	1.260707
