# Supplementary material for: Understanding nitrate formation in a world with less sulfate
Source: Copernicus journal article supplement (doi:10.5194/acp-18-12765-2018), 2018-09-05
Supplement: Supplementary file 2 [file acp-18-12765-2018-supplement.zip › DATA/RAW DATA FOR DIURNALS/data_extract_SOAS_jul_mod.csv]

Date	Hour	NH3	SO2	HNO3	CL	NA	MG	K	CA	NH4	NO3	SO4	T	RH	e_NO3	Water	H+	pH
07022011	01	0.009	0.053	0.008	0.002	0.002	0.002	0.004	0.009	0.061	0.001	0.044	297.747	0.761	0.8620024E-03	8.058143	0.5465407E-02	0.1686125
07022011	02	0.014	0.043	0.006	0.003	0.002	0.002	0.004	0.010	0.046	0.001	0.038	297.274	0.802	0.4667199E-01	4.883034	0.1301137E-03	1.574367
07022011	03	0.014	0.036	0.004	0.003	0.002	0.002	0.005	0.011	0.034	0.001	0.033	296.882	0.825	0.4714417E-01	4.428819	0.9072506E-04	1.688561
07022011	04	0.015	0.031	0.004	0.003	0.002	0.002	0.005	0.011	0.025	0.001	0.029	296.720	0.827	0.3852445E-01	3.632006	0.7121080E-04	1.707601
07022011	05	0.016	0.027	0.004	0.003	0.002	0.002	0.005	0.011	0.018	0.001	0.026	296.396	0.846	0.3487045E-01	3.381715	0.6051601E-04	1.747267
07022011	06	0.019	0.023	0.004	0.002	0.002	0.002	0.005	0.012	0.014	0.001	0.024	296.254	0.855	0.2990192E-01	2.877507	0.4456900E-04	1.809983
07022011	07	0.022	0.021	0.005	0.002	0.003	0.002	0.006	0.012	0.010	0.001	0.023	297.101	0.862	0.3208029E-01	2.655725	0.2654814E-04	2.000149
07022011	08	0.020	0.017	0.010	0.002	0.003	0.002	0.006	0.013	0.007	0.002	0.022	299.677	0.771	0.1081574E-01	1.448923	0.1657852E-04	1.941500
07022011	09	0.015	0.046	0.021	0.001	0.003	0.002	0.004	0.008	0.022	0.001	0.024	301.767	0.689	0.9109437E-02	1.927887	0.5920324E-04	1.512736
07022011	10	0.007	0.078	0.025	0.000	0.003	0.001	0.003	0.005	0.036	0.001	0.028	303.982	0.595	0.1271355E-01	2.885524	0.5783533E-02	-0.3019685
07022011	11	0.001	0.141	0.024	0.000	0.002	0.001	0.002	0.003	0.034	0.000	0.033	305.986	0.512	0.4959106E-04	1.659113	0.2232317E-02	-0.1288800
07022011	12	0.000	0.189	0.024	0.000	0.002	0.000	0.001	0.003	0.029	0.000	0.041	307.737	0.448	0.2384186E-06	2.131529	0.6277962E-02	-0.4691273
07022011	13	0.000	0.217	0.028	0.000	0.001	0.000	0.001	0.002	0.027	0.000	0.050	309.406	0.395	0.1192093E-06	3.092110	0.1936765E-01	-0.7968220
07022011	14	0.000	0.144	0.026	0.000	0.001	0.000	0.001	0.002	0.023	0.000	0.069	307.029	0.461	0.1072884E-05	6.196357	0.4338021E-01	-0.8451552
07022011	15	0.000	0.091	0.022	0.000	0.001	0.000	0.001	0.002	0.025	0.000	0.083	306.756	0.460	0.1490116E-05	7.728258	0.5583973E-01	-0.8588617
07022011	16	0.000	0.088	0.024	0.000	0.001	0.000	0.001	0.002	0.031	0.000	0.084	307.891	0.410	0.5364418E-06	6.606264	0.5025342E-01	-0.8812098
07022011	17	0.000	0.076	0.024	0.000	0.001	0.000	0.001	0.002	0.035	0.000	0.081	306.801	0.429	0.7152557E-06	6.280600	0.4316194E-01	-0.8370998
07022011	18	0.000	0.042	0.017	0.000	0.001	0.000	0.001	0.002	0.033	0.000	0.072	305.076	0.461	0.1132488E-05	5.812642	0.3618587E-01	-0.7941654
07022011	19	0.000	0.027	0.013	0.001	0.001	0.000	0.001	0.002	0.034	0.000	0.066	304.367	0.491	0.000000	5.414759	0.2912323E-01	-0.7306604
07022011	20	0.000	0.027	0.013	0.001	0.001	0.000	0.001	0.002	0.041	0.000	0.067	302.677	0.509	0.000000	5.289850	0.2311501E-01	-0.6404506
07022011	21	0.000	0.030	0.015	0.001	0.001	0.000	0.002	0.003	0.049	0.000	0.066	300.979	0.545	0.000000	4.918316	0.1222012E-01	-0.3952592
07022011	22	0.000	0.033	0.016	0.001	0.001	0.001	0.002	0.003	0.055	0.000	0.065	299.701	0.595	0.000000	5.106689	0.5019166E-02	0.7507853E-02
07022011	23	0.001	0.035	0.016	0.001	0.001	0.001	0.002	0.004	0.060	0.000	0.062	298.791	0.647	0.000000	5.332825	0.4099241E-02	0.1142539
07022011	24	0.001	0.034	0.015	0.001	0.001	0.001	0.002	0.004	0.066	0.001	0.058	298.068	0.703	0.000000	5.796560	0.6832995E-02	-0.7144078E-01
07032011	01	0.002	0.033	0.014	0.001	0.001	0.001	0.003	0.005	0.071	0.001	0.053	297.432	0.765	0.000000	6.815250	0.7355122E-02	-0.3310809E-01
07032011	02	0.004	0.032	0.014	0.001	0.001	0.001	0.003	0.005	0.072	0.001	0.048	297.014	0.804	0.000000	7.302729	0.5215200E-02	0.1462142
07032011	03	0.005	0.031	0.014	0.001	0.001	0.001	0.003	0.005	0.072	0.001	0.045	296.778	0.821	0.6473064E-03	8.717908	0.4852183E-02	0.2544751
07032011	04	0.010	0.031	0.013	0.001	0.001	0.001	0.003	0.005	0.069	0.002	0.042	296.602	0.830	0.5246252E-01	7.388139	0.3004339E-03	1.390786
07032011	05	0.015	0.031	0.013	0.001	0.001	0.001	0.003	0.006	0.064	0.002	0.040	296.462	0.837	0.5058742E-01	7.185520	0.2819267E-03	1.406322
07032011	06	0.020	0.031	0.013	0.001	0.002	0.001	0.004	0.006	0.058	0.002	0.038	296.402	0.843	0.4937971E-01	6.773440	0.2505733E-03	1.431875
07032011	07	0.024	0.031	0.013	0.001	0.002	0.001	0.004	0.007	0.052	0.002	0.037	297.318	0.849	0.4459721E-01	6.722779	0.2191733E-03	1.486761
07032011	08	0.023	0.027	0.015	0.001	0.002	0.002	0.005	0.009	0.046	0.002	0.036	299.582	0.787	0.2622682E-01	4.501039	0.1439750E-03	1.495026
07032011	09	0.039	0.104	0.038	0.000	0.003	0.002	0.004	0.009	0.038	0.002	0.033	301.200	0.731	NaN	5.631905	0.1274211E-02	0.6454141
07032011	10	0.036	0.149	0.041	0.000	0.002	0.001	0.003	0.007	0.044	0.001	0.032	303.172	0.662	NaN	4.255548	0.3023186E-02	0.1484908
07032011	11	0.013	0.175	0.043	0.000	0.002	0.001	0.002	0.005	0.055	0.000	0.038	305.552	0.563	NaN	2.802408	0.2872087E-01	-1.010666
07032011	12	0.001	0.152	0.040	0.000	0.001	0.000	0.001	0.003	0.046	0.000	0.046	307.020	0.508	0.2110004E-04	2.331280	0.1494206E-02	0.1931840
07032011	13	0.000	0.086	0.031	0.000	0.001	0.000	0.001	0.002	0.035	0.000	0.053	307.872	0.490	0.7748604E-06	3.687081	0.1457329E-01	-0.5968750
07032011	14	0.000	0.022	0.017	0.000	0.001	0.000	0.001	0.001	0.027	0.000	0.054	306.697	0.524	0.1788139E-05	4.901043	0.2501468E-01	-0.7079064
07032011	15	0.000	0.003	0.009	0.000	0.000	0.000	0.000	0.001	0.025	0.000	0.042	306.076	0.540	0.1788139E-05	3.780020	0.1684966E-01	-0.6490971
07032011	16	0.000	0.001	0.006	0.000	0.000	0.000	0.000	0.000	0.023	0.000	0.031	306.344	0.531	0.1132488E-05	2.464813	0.8424850E-02	-0.5337782
07032011	17	0.000	0.001	0.005	0.000	0.000	0.000	0.000	0.000	0.021	0.000	0.025	306.333	0.521	0.7748604E-06	1.741073	0.4282210E-02	-0.3908511
07032011	18	0.000	0.000	0.004	0.000	0.000	0.000	0.000	0.000	0.018	0.000	0.018	305.851	0.516	0.1788139E-05	1.031518	0.5046056E-03	0.3105249
07032011	19	0.001	0.000	0.003	0.000	0.000	0.000	0.000	0.000	0.016	0.000	0.014	304.793	0.526	0.1239777E-04	0.7995983	0.3045462E-03	0.4192187
07032011	20	0.001	0.000	0.002	0.000	0.000	0.000	0.000	0.000	0.014	0.000	0.010	303.106	0.585	0.3522635E-04	0.6720430	0.1167924E-02	-0.2400176
07032011	21	0.001	0.000	0.002	0.000	0.000	0.000	0.000	0.000	0.010	0.000	0.008	301.880	0.630	0.3290176E-04	0.6388164	0.6926342E-03	-0.3512794E-01
07032011	22	0.001	0.001	0.002	0.000	0.000	0.000	0.000	0.000	0.008	0.000	0.007	300.949	0.670	0.3606081E-04	0.6611236	0.5654874E-03	0.6785979E-01
07032011	23	0.001	0.001	0.002	0.000	0.000	0.000	0.000	0.000	0.007	0.000	0.006	300.192	0.710	0.5561113E-04	0.6577287	0.6396892E-03	0.1207777E-01
07032011	24	0.001	0.001	0.001	0.000	0.000	0.000	0.000	0.000	0.005	0.000	0.005	299.559	0.748	0.5167723E-04	0.6638497	0.5474432E-03	0.8373062E-01
07042011	01	0.001	0.000	0.001	0.000	0.000	0.000	0.000	0.000	0.005	0.000	0.004	299.070	0.783	0.1397729E-03	0.5747127	0.5243673E-03	0.3981517E-01
07042011	02	0.001	0.000	0.001	0.000	0.000	0.000	0.000	0.000	0.004	0.000	0.003	298.558	0.822	0.3724098E-03	0.5411486	0.3096780E-03	0.2424062
07042011	03	0.001	0.000	0.001	0.000	0.000	0.000	0.000	0.000	0.005	0.000	0.003	298.199	0.848	0.2452731E-03	0.6711410	0.5273941E-03	0.1046785
07042011	04	0.001	0.000	0.001	0.000	0.000	0.000	0.000	0.000	0.005	0.000	0.003	298.222	0.817	0.1933575E-03	0.5671077	0.5618327E-03	0.4058592E-02
07042011	05	0.001	0.000	0.000	0.000	0.000	0.000	0.000	0.000	0.005	0.000	0.004	297.855	0.847	NaN	0.8438820	0.1638163E-02	-0.2880753
07042011	06	0.001	0.000	0.000	0.000	0.000	0.000	0.000	0.000	0.005	0.000	0.004	297.572	0.881	NaN	1.047120	0.1608167E-02	-0.1863344
07042011	07	0.001	0.000	0.001	0.000	0.000	0.000	0.000	0.000	0.005	0.000	0.006	298.208	0.875	0.2607703E-03	1.694915	0.1442986E-02	0.6988595E-01
07042011	08	0.001	0.000	0.001	0.000	0.000	0.000	0.000	0.000	0.007	0.000	0.008	299.940	0.820	0.1043081E-03	1.538462	0.1494532E-02	0.1258156E-01
07042011	09	0.000	0.002	0.003	0.000	0.000	0.000	0.000	0.000	0.009	0.000	0.012	301.235	0.762	0.2902746E-04	1.999189	0.3919716E-02	-0.2924007
07042011	10	0.000	0.003	0.006	0.000	0.000	0.000	0.000	0.000	0.011	0.000	0.014	302.854	0.688	0.1025200E-04	1.764340	0.3684690E-02	-0.3198188
07042011	11	0.000	0.003	0.007	0.000	0.000	0.000	0.000	0.000	0.013	0.000	0.015	304.683	0.617	0.3576279E-05	1.403869	0.2447646E-02	-0.2414220
07042011	12	0.000	0.003	0.008	0.000	0.000	0.000	0.000	0.000	0.010	0.000	0.013	305.856	0.572	0.9536743E-06	1.133335	0.3237878E-02	-0.4559022
07042011	13	0.000	0.001	0.004	0.000	0.000	0.000	0.000	0.000	0.008	0.000	0.010	305.208	0.580	0.9536743E-06	0.8735925	0.2200688E-02	-0.4012496
07042011	14	0.002	0.000	0.002	0.000	0.000	0.000	0.000	0.000	0.010	0.000	0.007	305.522	0.570	0.6633997E-04	0.4858491	0.6670624E-03	-0.1376651
07042011	15	0.002	0.000	0.002	0.000	0.000	0.000	0.000	0.000	0.013	0.000	0.007	305.881	0.552	0.2968311E-04	0.5196733	0.1564338E-02	-0.4786001
07042011	16	0.001	0.000	0.001	0.000	0.000	0.000	0.000	0.000	0.011	0.000	0.006	304.313	0.617	0.1239938E-01	0.5454546	0.1239946E-04	1.643356
07042011	17	0.001	0.000	0.001	0.000	0.000	0.000	0.000	0.000	0.007	0.000	0.005	303.184	0.659	0.6055832E-04	0.4509962	0.5673855E-03	-0.9970534E-01
07042011	18	0.001	0.000	0.001	0.000	0.000	0.000	0.000	0.000	0.006	0.000	0.005	302.268	0.704	0.4565716E-04	0.5193141	0.4855391E-03	0.2920588E-01
07042011	19	0.002	0.000	0.000	0.000	0.000	0.000	0.000	0.000	0.000	0.000	0.000	301.078	0.768	NaN	0.1000000E-10	0.1000000E-13	0.000000
07042011	20	0.003	0.000	0.000	0.000	0.000	0.000	0.000	0.000	0.000	0.000	0.000	299.754	0.823	NaN	0.1000000E-10	0.1000000E-13	0.000000
07042011	21	0.005	0.000	0.000	0.000	0.000	0.000	0.000	0.000	0.000	0.000	0.000	298.859	0.858	NaN	0.1000000E-10	0.1000000E-13	0.000000
07042011	22	0.005	0.000	0.000	0.000	0.000	0.000	0.000	0.000	0.000	0.000	0.000	298.228	0.879	NaN	0.1000000E-10	0.1000000E-13	0.000000
07042011	23	0.006	0.000	0.000	0.000	0.000	0.000	0.000	0.000	0.000	0.000	0.000	297.758	0.895	NaN	0.1000000E-10	0.1000000E-13	0.000000
07042011	24	0.007	0.000	0.001	0.000	0.000	0.000	0.000	0.000	0.000	0.000	0.000	297.440	0.907	0.000000	0.1000000E-10	0.9501479E-15	1.022209
07052011	01	0.009	0.000	0.001	0.000	0.000	0.000	0.000	0.000	0.000	0.000	0.000	297.213	0.914	0.000000	0.1000000E-10	0.7287154E-15	1.137442
07052011	02	0.010	0.000	0.001	0.000	0.000	0.000	0.000	0.000	0.000	0.000	0.000	297.028	0.918	0.000000	0.1000000E-10	0.6450380E-15	1.190415
07052011	03	0.010	0.001	0.001	0.000	0.000	0.000	0.000	0.000	0.000	0.000	0.000	296.871	0.921	0.000000	0.1000000E-10	0.6337835E-15	1.198059
07052011	04	0.009	0.001	0.001	0.000	0.000	0.000	0.000	0.000	0.000	0.000	0.000	296.712	0.926	0.000000	0.1000000E-10	0.6894136E-15	1.161520
07052011	05	0.008	0.001	0.001	0.000	0.000	0.000	0.001	0.000	0.001	0.000	0.001	296.554	0.925	NaN	0.8102924	0.1618116E-04	1.699632
07052011	06	0.008	0.001	0.001	0.000	0.000	0.000	0.001	0.000	0.003	0.000	0.002	296.377	0.931	NaN	1.250311	0.3533440E-04	1.548820
07052011	07	0.007	0.001	0.002	0.000	0.001	0.000	0.001	0.000	0.007	0.000	0.005	296.972	0.920	NaN	2.496204	0.1643109E-03	1.181614
07052011	08	0.008	0.006	0.003	0.000	0.002	0.000	0.001	0.001	0.015	0.000	0.010	298.303	0.888	NaN	3.162985	0.2781526E-03	1.055814
07052011	09	0.004	0.026	0.009	0.000	0.002	0.000	0.001	0.002	0.024	0.000	0.017	299.734	0.836	0.2850175E-01	3.602299	0.3503109E-02	0.1212619E-01
07052011	10	0.001	0.046	0.014	0.000	0.001	0.000	0.001	0.001	0.021	0.000	0.022	300.878	0.787	0.2856851E-03	3.417930	0.3423329E-02	-0.6853853E-03
07052011	11	0.000	0.019	0.011	0.000	0.000	0.000	0.000	0.001	0.016	0.000	0.020	301.968	0.745	0.4506111E-04	2.887228	0.4906462E-02	-0.2302873
07052011	12	0.000	0.007	0.009	0.000	0.000	0.000	0.000	0.000	0.013	0.000	0.017	303.200	0.691	0.1156330E-04	2.173049	0.4803781E-02	-0.3445137
07052011	13	0.000	0.004	0.007	0.000	0.000	0.000	0.000	0.000	0.012	0.000	0.014	304.672	0.617	0.3218651E-05	1.321225	0.2411473E-02	-0.2613057
07052011	14	0.000	0.002	0.006	0.000	0.000	0.000	0.000	0.000	0.011	0.000	0.012	304.961	0.599	0.2443790E-05	1.002583	0.1340776E-02	-0.1262361
07052011	15	0.000	0.002	0.004	0.000	0.000	0.000	0.000	0.000	0.009	0.000	0.011	304.350	0.619	0.2384186E-05	1.073291	0.2314951E-02	-0.3338243
07052011	16	0.000	0.003	0.004	0.000	0.000	0.000	0.000	0.000	0.009	0.000	0.013	303.542	0.650	0.4112720E-05	1.536018	0.4467997E-02	-0.4637164
07052011	17	0.000	0.004	0.003	0.000	0.000	0.000	0.000	0.000	0.009	0.000	0.015	302.323	0.697	0.1049042E-04	2.198315	0.6750701E-02	-0.4872590
07052011	18	0.000	0.004	0.003	0.000	0.000	0.000	0.000	0.000	0.010	0.000	0.016	301.165	0.747	0.2759695E-04	2.744153	0.7064347E-02	-0.4106636
07052011	19	0.000	0.003	0.002	0.000	0.000	0.000	0.000	0.000	0.010	0.000	0.016	300.147	0.795	0.6705523E-04	3.344690	0.7376974E-02	-0.3435223
07052011	20	0.000	0.003	0.002	0.000	0.000	0.000	0.000	0.000	0.010	0.000	0.016	299.046	0.828	0.1221895E-03	3.845210	0.7626620E-02	-0.2974121
07052011	21	0.000	0.003	0.002	0.000	0.000	0.000	0.000	0.000	0.013	0.000	0.016	298.273	0.855	0.3155470E-03	4.223781	0.5463887E-02	-0.1118004
07052011	22	0.001	0.002	0.002	0.000	0.000	0.000	0.000	0.000	0.016	0.000	0.015	297.691	0.875	0.9688139E-03	4.154465	0.2887553E-02	0.1579852
07052011	23	0.001	0.002	0.002	0.000	0.000	0.000	0.001	0.000	0.018	0.000	0.014	297.248	0.888	0.2467334E-02	4.045505	0.3051578E-02	0.1224483
07052011	24	0.002	0.002	0.002	0.000	0.000	0.000	0.001	0.000	0.021	0.000	0.014	296.907	0.895	0.8191764E-02	4.456184	0.2928759E-02	0.1822795
07062011	01	0.002	0.002	0.002	0.000	0.000	0.000	0.001	0.000	0.024	0.000	0.013	296.620	0.901	NaN	4.251266	0.7030205E-03	0.7815502
07062011	02	0.004	0.002	0.003	0.000	0.000	0.000	0.001	0.000	0.023	0.000	0.013	296.384	0.907	NaN	4.716687	0.1100685E-02	0.6319739
07062011	03	0.006	0.003	0.003	0.000	0.000	0.000	0.001	0.000	0.023	0.000	0.012	296.234	0.910	NaN	4.792474	0.4570162E-03	1.020628
07062011	04	0.007	0.003	0.003	0.000	0.000	0.000	0.001	0.000	0.023	0.000	0.012	296.127	0.911	NaN	4.852372	0.3809867E-03	1.105044
07062011	05	0.008	0.004	0.003	0.000	0.000	0.000	0.001	0.000	0.023	0.000	0.012	296.040	0.913	NaN	4.898934	0.3236312E-03	1.180051
07062011	06	0.008	0.005	0.003	0.000	0.001	0.000	0.001	0.000	0.023	0.000	0.012	295.978	0.918	NaN	5.568689	0.2652306E-03	1.322129
07062011	07	0.009	0.005	0.003	0.000	0.001	0.000	0.001	0.000	0.023	0.000	0.012	296.672	0.918	NaN	5.581962	0.2460879E-03	1.355697
07062011	08	0.002	0.015	0.005	0.000	0.001	0.000	0.001	0.000	0.021	0.000	0.014	297.802	0.855	0.5531013E-02	3.260988	0.2930515E-02	0.4640533E-01
07062011	09	0.000	0.059	0.012	0.000	0.001	0.000	0.000	0.000	0.015	0.000	0.019	299.273	0.796	0.000000	3.604151	0.5643489E-02	-0.1947448
07062011	10	0.000	0.069	0.014	0.000	0.001	0.000	0.000	0.001	0.015	0.000	0.020	300.738	0.741	0.4255772E-04	2.792085	0.4867531E-02	-0.2413801
07062011	11	0.000	0.084	0.015	0.000	0.001	0.000	0.000	0.001	0.015	0.000	0.021	302.265	0.680	0.1341105E-04	2.424745	0.5206662E-02	-0.3318932
07062011	12	0.000	0.093	0.015	0.000	0.001	0.000	0.000	0.001	0.015	0.000	0.021	303.759	0.616	0.4351139E-05	1.991498	0.4782923E-02	-0.3805135
07062011	13	0.000	0.100	0.015	0.000	0.001	0.000	0.000	0.001	0.014	0.000	0.020	305.082	0.562	0.1251698E-05	1.584413	0.4472079E-02	-0.4506412
07062011	14	0.000	0.095	0.014	0.000	0.000	0.000	0.000	0.000	0.015	0.000	0.020	305.732	0.539	0.9536743E-06	1.624655	0.5300644E-02	-0.5135673
07062011	15	0.000	0.092	0.015	0.000	0.000	0.000	0.000	0.000	0.017	0.000	0.020	305.672	0.538	0.9536743E-06	1.468316	0.3279936E-02	-0.3490459
07062011	16	0.000	0.087	0.015	0.000	0.000	0.000	0.000	0.000	0.019	0.000	0.021	305.372	0.543	0.1251698E-05	1.451836	0.2319687E-02	-0.2035118
07062011	17	0.000	0.079	0.015	0.000	0.000	0.000	0.000	0.001	0.020	0.000	0.021	304.791	0.554	0.3457069E-05	1.279590	0.1080778E-02	0.7333460E-01
07062011	18	0.001	0.069	0.013	0.000	0.000	0.000	0.000	0.001	0.022	0.000	0.021	304.157	0.562	0.1841784E-04	1.290444	0.1169421E-02	0.4276829E-01
07062011	19	0.001	0.058	0.012	0.000	0.000	0.000	0.001	0.001	0.025	0.000	0.021	303.327	0.570	0.4404783E-04	1.277315	0.1978663E-02	-0.1900740
07062011	20	0.002	0.045	0.010	0.000	0.000	0.000	0.001	0.001	0.029	0.000	0.022	301.459	0.642	0.1527667E-03	1.693504	0.4015118E-02	-0.3749120
07062011	21	0.003	0.035	0.009	0.000	0.001	0.000	0.001	0.002	0.033	0.000	0.023	300.375	0.667	0.1225829E-02	2.101904	0.4284638E-02	-0.3093013
07062011	22	0.005	0.032	0.009	0.001	0.001	0.001	0.002	0.003	0.037	0.000	0.024	299.581	0.698	0.2221352E-01	2.502798	0.8382049E-04	1.475076
07062011	23	0.007	0.032	0.011	0.001	0.001	0.001	0.003	0.004	0.038	0.000	0.025	298.937	0.734	0.2338850E-01	2.756661	0.1062459E-03	1.414071
07062011	24	0.009	0.035	0.014	0.001	0.002	0.001	0.003	0.005	0.037	0.001	0.027	298.340	0.779	0.2419418E-01	3.504354	0.1385112E-03	1.403123
07072011	01	0.010	0.040	0.019	0.001	0.002	0.001	0.004	0.006	0.037	0.001	0.028	297.818	0.825	0.2508646E-01	4.403279	0.1687756E-03	1.416467
07072011	02	0.006	0.045	0.024	0.001	0.003	0.001	0.005	0.008	0.038	0.001	0.030	297.466	0.855	0.2581269E-01	5.252240	0.2001921E-03	1.418898
07072011	03	0.005	0.049	0.026	0.001	0.003	0.001	0.005	0.009	0.038	0.001	0.031	297.289	0.865	0.2522469E-03	10.22209	0.4550301E-02	0.3514996
07072011	04	0.005	0.051	0.025	0.001	0.003	0.002	0.005	0.010	0.037	0.001	0.031	297.202	0.870	0.2549940E-01	5.380975	0.1911327E-03	1.449526
07072011	05	0.005	0.053	0.021	0.001	0.003	0.002	0.005	0.010	0.034	0.001	0.030	297.089	0.880	0.2918243E-03	11.56586	0.4580932E-02	0.4022241
07072011	06	0.005	0.054	0.018	0.001	0.003	0.002	0.005	0.011	0.030	0.001	0.029	297.051	0.890	0.2574325E-03	11.95099	0.4452160E-02	0.4288332
07072011	07	0.006	0.054	0.019	0.001	0.004	0.002	0.005	0.011	0.026	0.001	0.027	297.993	0.890	0.2353251E-01	4.773891	0.1212323E-03	1.595254
07072011	08	0.010	0.062	0.028	0.001	0.004	0.002	0.005	0.011	0.017	0.001	0.024	300.734	0.807	0.9371996E-02	2.430237	0.6524450E-04	1.571105
07072011	09	0.007	0.271	0.054	0.000	0.003	0.001	0.003	0.006	0.018	0.001	0.022	302.254	0.734	0.7253110E-02	2.403131	0.3781621E-02	-0.1969005
07072011	10	0.000	0.393	0.056	0.000	0.001	0.000	0.001	0.002	0.017	0.000	0.031	303.760	0.652	0.8881092E-05	3.540278	0.1114851E-01	-0.4981793
07072011	11	0.000	0.233	0.040	0.000	0.001	0.000	0.001	0.001	0.014	0.000	0.030	304.951	0.598	0.3695488E-05	3.297859	0.1389216E-01	-0.6245377
07072011	12	0.000	0.148	0.031	0.000	0.000	0.000	0.001	0.001	0.013	0.000	0.033	305.913	0.550	0.1907349E-05	3.470872	0.1885026E-01	-0.7348788
07072011	13	0.000	0.109	0.027	0.000	0.000	0.000	0.000	0.001	0.013	0.000	0.033	306.850	0.506	0.1072884E-05	3.224432	0.1978472E-01	-0.7878768
07072011	14	0.000	0.073	0.022	0.000	0.000	0.000	0.000	0.001	0.013	0.000	0.031	307.700	0.482	0.5960464E-06	2.761042	0.1760903E-01	-0.8046623
07072011	15	0.000	0.041	0.017	0.000	0.000	0.000	0.000	0.001	0.012	0.000	0.026	307.280	0.483	0.4172325E-06	2.212955	0.1348143E-01	-0.7847632
07072011	16	0.000	0.021	0.013	0.000	0.000	0.000	0.000	0.000	0.011	0.000	0.021	306.831	0.494	0.4172325E-06	1.834173	0.1034747E-01	-0.7513938
07072011	17	0.000	0.012	0.011	0.000	0.000	0.000	0.000	0.000	0.010	0.000	0.016	306.042	0.512	0.4172325E-06	1.343738	0.6244098E-02	-0.6671551
07072011	18	0.000	0.009	0.009	0.000	0.000	0.000	0.000	0.000	0.011	0.000	0.014	305.120	0.532	0.5364418E-06	1.065506	0.3191548E-02	-0.4764454
07072011	19	0.000	0.008	0.007	0.000	0.000	0.000	0.000	0.001	0.013	0.000	0.013	303.941	0.560	0.7152557E-05	0.7840520	0.7375490E-03	0.2655398E-01
07072011	20	0.001	0.007	0.006	0.000	0.000	0.000	0.001	0.001	0.015	0.000	0.013	302.165	0.619	0.5495548E-04	0.9080207	0.1861114E-02	-0.3116772
07072011	21	0.002	0.008	0.007	0.000	0.000	0.000	0.001	0.001	0.017	0.000	0.014	300.873	0.636	0.1054406E-03	1.047301	0.2823276E-02	-0.4306817
07072011	22	0.003	0.013	0.009	0.000	0.001	0.000	0.001	0.001	0.018	0.000	0.014	299.917	0.655	0.5306602E-03	1.241508	0.3110281E-02	-0.3988501
07072011	23	0.003	0.018	0.011	0.000	0.001	0.000	0.002	0.002	0.019	0.000	0.014	299.128	0.690	0.1359689E-01	1.568145	0.2899282E-02	-0.2669044
07072011	24	0.003	0.022	0.013	0.000	0.001	0.000	0.002	0.002	0.020	0.000	0.014	298.392	0.742	NaN	1.726430	0.8810726E-02	-0.7078627
07082011	01	0.003	0.024	0.014	0.000	0.001	0.000	0.002	0.002	0.022	0.000	0.014	297.716	0.802	NaN	2.419524	0.7144385E-02	-0.4702349
07082011	02	0.004	0.024	0.015	0.000	0.001	0.001	0.002	0.002	0.022	0.000	0.015	297.252	0.843	NaN	3.386860	0.6262395E-02	-0.2669432
07082011	03	0.006	0.023	0.015	0.000	0.001	0.001	0.002	0.003	0.021	0.000	0.015	297.003	0.860	NaN	4.063655	0.3873649E-02	0.2079658E-01
07082011	04	0.006	0.019	0.014	0.000	0.001	0.001	0.002	0.003	0.021	0.000	0.015	296.829	0.869	NaN	4.361457	0.3228013E-02	0.1306963
07082011	05	0.006	0.015	0.011	0.000	0.001	0.001	0.002	0.003	0.021	0.000	0.015	296.693	0.875	NaN	4.627777	0.1692021E-02	0.4369667
07082011	06	0.007	0.011	0.008	0.000	0.001	0.001	0.002	0.003	0.021	0.000	0.015	296.662	0.881	NaN	4.494390	0.6314708E-03	0.8523175
07082011	07	0.008	0.008	0.006	0.000	0.001	0.001	0.002	0.003	0.021	0.000	0.015	297.572	0.888	NaN	4.623949	0.3556685E-03	1.113968
07082011	08	0.006	0.006	0.005	0.000	0.001	0.001	0.002	0.003	0.021	0.000	0.015	300.114	0.804	NaN	2.445268	0.5238927E-03	0.6690841
07082011	09	0.002	0.017	0.017	0.000	0.001	0.000	0.001	0.001	0.019	0.000	0.016	301.954	0.734	0.2997518E-03	1.747227	0.3106592E-02	-0.2499350
07082011	10	0.000	0.067	0.019	0.000	0.001	0.000	0.001	0.001	0.015	0.000	0.019	303.914	0.639	0.9179115E-05	1.707238	0.2166329E-02	-0.1034302
07082011	11	0.000	0.147	0.019	0.000	0.001	0.000	0.000	0.001	0.020	0.000	0.022	305.333	0.575	0.4708767E-05	1.453326	0.1296985E-02	0.4942827E-01
07082011	12	0.001	0.129	0.016	0.000	0.001	0.000	0.000	0.000	0.025	0.000	0.020	306.578	0.527	0.000000	1.141807	0.1974451E-02	-0.2378536
07082011	13	0.001	0.070	0.014	0.000	0.001	0.000	0.000	0.001	0.027	0.000	0.024	305.987	0.531	0.2360344E-04	1.331081	0.1619911E-02	-0.8528671E-01
07082011	14	0.000	0.028	0.012	0.000	0.001	0.000	0.001	0.001	0.026	0.000	0.029	305.309	0.568	0.8285046E-05	1.960593	0.1445606E-02	0.1323376
07082011	15	0.001	0.019	0.010	0.001	0.001	0.000	0.001	0.001	0.028	0.000	0.029	305.646	0.544	0.000000	1.710985	0.1193007E-02	0.1566033
07082011	16	0.001	0.012	0.009	0.000	0.001	0.000	0.001	0.001	0.031	0.000	0.029	305.460	0.549	0.3141165E-04	1.738690	0.1634017E-02	0.2696554E-01
07082011	17	0.001	0.005	0.009	0.000	0.000	0.000	0.001	0.001	0.029	0.000	0.028	305.285	0.540	0.2026558E-04	1.608635	0.1238840E-02	0.1134422
07082011	18	0.001	0.003	0.007	0.000	0.000	0.000	0.001	0.001	0.025	0.000	0.022	304.954	0.533	0.2533197E-04	1.171434	0.1481068E-02	-0.1018572
07082011	19	0.001	0.002	0.004	0.001	0.000	0.000	0.001	0.001	0.025	0.000	0.020	303.990	0.587	0.000000	1.287582	0.2485518E-02	-0.2856421
07082011	20	0.001	0.001	0.003	0.001	0.000	0.000	0.001	0.001	0.023	0.000	0.019	302.115	0.656	0.000000	1.598489	0.2599750E-02	-0.2112220
07082011	21	0.001	0.000	0.002	0.001	0.000	0.000	0.001	0.001	0.020	0.000	0.017	301.169	0.671	0.000000	1.481187	0.2372171E-02	-0.2045360
07082011	22	0.001	0.000	0.002	0.001	0.000	0.000	0.001	0.001	0.018	0.000	0.016	300.672	0.659	0.000000	1.346027	0.2007556E-02	-0.1736141
07082011	23	0.001	0.000	0.001	0.001	0.000	0.000	0.001	0.001	0.016	0.000	0.016	299.884	0.706	0.000000	1.684828	0.1889757E-02	-0.4985038E-01
07082011	24	0.001	0.000	0.001	0.002	0.000	0.000	0.001	0.001	0.016	0.000	0.016	299.187	0.774	0.000000	2.179818	0.2405470E-02	-0.4277971E-01
07092011	01	0.001	0.000	0.001	0.001	0.000	0.000	0.001	0.001	0.016	0.000	0.017	298.645	0.831	0.000000	3.188848	0.3216800E-02	-0.3790306E-02
07092011	02	0.001	0.000	0.001	0.001	0.000	0.000	0.001	0.001	0.017	0.000	0.017	298.251	0.873	0.000000	4.078293	0.3534462E-02	0.6215504E-01
07092011	03	0.001	0.001	0.001	0.002	0.001	0.000	0.001	0.001	0.020	0.000	0.018	298.210	0.872	0.000000	4.252763	0.3519365E-02	0.8220692E-01
07092011	04	0.002	0.001	0.001	0.002	0.002	0.000	0.001	0.001	0.022	0.000	0.019	298.220	0.866	0.000000	4.427234	0.3601823E-02	0.8961012E-01
07092011	05	0.002	0.002	0.001	0.002	0.003	0.000	0.001	0.002	0.022	0.000	0.019	298.037	0.906	0.000000	5.988510	0.3382461E-02	0.2480860
07092011	06	0.002	0.004	0.002	0.002	0.005	0.001	0.001	0.002	0.020	0.000	0.019	298.017	0.915	0.000000	6.766716	0.3059661E-02	0.3447047
07092011	07	0.002	0.011	0.005	0.002	0.005	0.001	0.001	0.003	0.018	0.000	0.018	298.823	0.903	0.000000	4.872773	0.2697843E-02	0.2567595
07092011	08	0.003	0.022	0.011	0.003	0.004	0.001	0.002	0.003	0.018	0.001	0.017	300.743	0.833	0.2956390E-04	3.258859	0.3094021E-02	0.2254226E-01
07092011	09	0.004	0.041	0.023	0.002	0.003	0.000	0.002	0.003	0.022	0.001	0.018	302.100	0.779	0.2765656E-04	2.695888	0.3629728E-02	-0.1291722
07092011	10	0.004	0.050	0.029	0.001	0.003	0.000	0.002	0.003	0.026	0.002	0.019	303.895	0.707	0.7326901E-02	1.955746	0.8218500E-04	1.376520
07092011	11	0.004	0.056	0.032	0.001	0.002	0.000	0.001	0.002	0.027	0.001	0.021	305.480	0.644	0.000000	1.724713	0.4497454E-02	-0.4162498
07092011	12	0.002	0.059	0.038	0.000	0.001	0.000	0.001	0.002	0.024	0.001	0.021	306.681	0.592	0.6484985E-04	1.303637	0.2896143E-02	-0.3466632
07092011	13	0.001	0.059	0.036	0.000	0.001	0.000	0.001	0.002	0.024	0.001	0.022	307.711	0.550	0.3325939E-04	1.215039	0.2023100E-02	-0.2214273
07092011	14	0.001	0.025	0.022	0.000	0.001	0.000	0.001	0.001	0.024	0.001	0.026	306.546	0.578	0.1692772E-04	1.777499	0.1383584E-02	0.1088039
07092011	15	0.001	0.003	0.009	0.001	0.000	0.000	0.001	0.001	0.023	0.000	0.024	306.121	0.597	0.000000	1.729005	0.1429846E-02	0.8250719E-01
07092011	16	0.001	0.001	0.005	0.000	0.000	0.000	0.000	0.001	0.022	0.000	0.018	305.999	0.600	0.4476309E-04	1.220845	0.2153695E-02	-0.2465238
07092011	17	0.003	0.000	0.004	0.000	0.000	0.000	0.000	0.000	0.020	0.000	0.013	306.092	0.587	0.2107620E-03	0.9860734	0.9878128E-03	-0.7653945E-03
07092011	18	0.004	0.001	0.004	0.000	0.000	0.000	0.000	0.000	0.017	0.000	0.011	305.608	0.584	0.6662011E-03	0.8576891	0.3975657E-03	0.3339210
07092011	19	0.002	0.001	0.004	0.000	0.000	0.000	0.000	0.000	0.018	0.000	0.010	304.429	0.606	0.1248717E-03	0.8826125	0.1529021E-02	-0.2386433
07092011	20	0.003	0.001	0.004	0.000	0.000	0.000	0.001	0.000	0.016	0.000	0.008	302.435	0.705	NaN	1.053357	0.1147085E-02	-0.3702012E-01
07092011	21	0.002	0.001	0.004	0.000	0.000	0.000	0.001	0.000	0.016	0.000	0.009	301.427	0.741	NaN	1.196127	0.2372984E-02	-0.2975175
07092011	22	0.001	0.001	0.003	0.000	0.000	0.000	0.001	0.000	0.015	0.000	0.008	300.912	0.744	NaN	1.061899	0.1704550E-02	-0.2055264
07092011	23	0.001	0.000	0.003	0.000	0.000	0.000	0.001	0.000	0.013	0.000	0.007	300.260	0.776	NaN	1.088159	0.1680695E-02	-0.1887967
07092011	24	0.002	0.000	0.002	0.001	0.000	0.000	0.000	0.000	0.012	0.000	0.007	299.815	0.800	0.2944469E-04	1.200686	0.2187766E-02	-0.2605714
07102011	01	0.002	0.000	0.001	0.001	0.000	0.000	0.000	0.000	0.010	0.000	0.006	299.486	0.805	0.000000	1.079137	0.1982270E-02	-0.2640863
07102011	02	0.002	0.000	0.001	0.000	0.000	0.000	0.000	0.000	0.008	0.000	0.004	298.994	0.843	0.4988313E-03	0.8438820	0.3788882E-03	0.3477706
07102011	03	0.002	0.000	0.000	0.000	0.000	0.000	0.000	0.000	0.007	0.000	0.004	298.704	0.869	NaN	1.023018	0.4778223E-03	0.3306168
07102011	04	0.002	0.000	0.000	0.000	0.000	0.000	0.000	0.000	0.008	0.000	0.004	298.653	0.870	NaN	1.023018	0.4291262E-03	0.3772982
07102011	05	0.002	0.001	0.001	0.000	0.000	0.000	0.000	0.000	0.010	0.000	0.007	298.561	0.882	0.2611279E-02	1.873567	0.5415383E-03	0.5390400
07102011	06	0.001	0.002	0.002	0.000	0.000	0.000	0.000	0.000	0.012	0.000	0.010	298.566	0.898	0.1427412E-02	3.212792	0.1555296E-02	0.3150696
07102011	07	0.001	0.002	0.003	0.001	0.000	0.000	0.000	0.000	0.015	0.000	0.013	299.450	0.888	0.000000	3.854959	0.3234820E-02	0.7616959E-01
07102011	08	0.002	0.002	0.005	0.000	0.000	0.000	0.000	0.000	0.021	0.000	0.015	301.030	0.826	0.1037955E-02	2.811143	0.1566275E-02	0.2540148
07102011	09	0.001	0.002	0.010	0.000	0.000	0.000	0.000	0.001	0.019	0.000	0.016	302.314	0.778	0.2847910E-03	2.224183	0.2896791E-02	-0.1147466
07102011	10	0.001	0.002	0.010	0.000	0.000	0.000	0.000	0.001	0.016	0.000	0.014	303.827	0.717	0.1090169E-03	1.489798	0.2246696E-02	-0.1784168
07102011	11	0.001	0.001	0.008	0.000	0.000	0.000	0.000	0.001	0.015	0.000	0.013	305.111	0.671	0.6127357E-04	1.123044	0.1979809E-02	-0.2462264
07102011	12	0.001	0.001	0.008	0.000	0.000	0.000	0.000	0.001	0.014	0.000	0.012	306.096	0.622	0.3606081E-04	0.8485345	0.1780298E-02	-0.3218232
07102011	13	0.002	0.001	0.007	0.000	0.000	0.000	0.000	0.001	0.015	0.000	0.012	307.366	0.566	0.3767014E-04	0.7036163	0.2510711E-02	-0.5524608
07102011	14	0.003	0.000	0.004	0.000	0.000	0.000	0.000	0.001	0.013	0.000	0.009	307.473	0.566	0.6032705E-02	0.6289310	0.3326675E-02	-0.7234074
07102011	15	0.002	0.000	0.003	0.000	0.000	0.000	0.000	0.000	0.013	0.000	0.007	306.372	0.609	0.3713369E-04	0.6178288	0.1501679E-02	-0.3857090
07102011	16	0.003	0.000	0.003	0.000	0.000	0.000	0.000	0.000	0.011	0.000	0.006	305.332	0.646	0.5686283E-04	0.5964215	0.1032275E-02	-0.2382420
07102011	17	0.002	0.000	0.003	0.000	0.000	0.000	0.000	0.000	0.009	0.000	0.005	304.216	0.676	0.5072355E-04	0.5464481	0.1061993E-02	-0.2885728
07102011	18	0.004	0.000	0.003	0.000	0.000	0.000	0.000	0.000	0.009	0.000	0.005	303.140	0.716	0.1303554E-03	0.6242197	0.6006875E-03	0.1668892E-01
07102011	19	0.006	0.000	0.004	0.000	0.000	0.000	0.000	0.000	0.009	0.000	0.005	301.759	0.770	0.3448725E-03	0.7530121	0.3490805E-03	0.3338764
07102011	20	0.007	0.000	0.004	0.000	0.000	0.000	0.000	0.000	0.009	0.000	0.005	300.520	0.812	0.6886721E-03	0.8992805	0.2530151E-03	0.5507488
07102011	21	0.008	0.000	0.005	0.000	0.000	0.000	0.001	0.000	0.009	0.000	0.005	299.784	0.836	NaN	1.601753	0.2895322E-03	0.7428987
07102011	22	0.008	0.000	0.005	0.000	0.000	0.000	0.001	0.000	0.009	0.000	0.005	299.311	0.854	NaN	1.716909	0.2822698E-03	0.7840829
07102011	23	0.008	0.000	0.005	0.000	0.000	0.000	0.001	0.000	0.008	0.000	0.005	298.906	0.874	NaN	1.974529	0.3410058E-03	0.7627017
07102011	24	0.007	0.000	0.004	0.000	0.000	0.000	0.001	0.000	0.007	0.000	0.004	298.656	0.894	NaN	1.908001	0.2159392E-03	0.9462471
07112011	01	0.006	0.000	0.003	0.000	0.000	0.000	0.001	0.000	0.005	0.000	0.003	298.505	0.910	NaN	1.762505	0.1646933E-03	1.029454
07112011	02	0.005	0.000	0.002	0.000	0.000	0.000	0.001	0.000	0.004	0.000	0.003	298.478	0.905	NaN	1.453384	0.2038276E-03	0.8531172
07112011	03	0.003	0.000	0.001	0.000	0.000	0.000	0.000	0.000	0.004	0.000	0.003	298.381	0.914	0.5713105E-03	1.090909	0.3434283E-03	0.5019525
07112011	04	0.003	0.000	0.001	0.000	0.000	0.000	0.000	0.000	0.004	0.000	0.003	298.349	0.922	0.6849766E-03	1.224490	0.3285655E-03	0.5713332
07112011	05	0.003	0.000	0.001	0.000	0.000	0.000	0.000	0.000	0.004	0.000	0.002	298.304	0.929	0.9696484E-03	0.9345794	0.1160732E-03	0.9058842
07112011	06	0.003	0.000	0.001	0.000	0.000	0.000	0.000	0.000	0.005	0.000	0.003	298.354	0.928	0.1168907E-02	1.401869	0.2204738E-03	0.8033506
07112011	07	0.003	0.000	0.001	0.000	0.000	0.000	0.000	0.000	0.005	0.000	0.003	299.175	0.922	0.7768869E-03	1.224490	0.2465027E-03	0.6961334
07112011	08	0.003	0.000	0.001	0.000	0.000	0.000	0.000	0.000	0.005	0.000	0.003	300.603	0.864	0.2547503E-03	0.7159904	0.3368748E-03	0.3274387
07112011	09	0.000	0.000	0.001	0.000	0.000	0.000	0.000	0.000	0.003	0.000	0.004	301.225	0.845	0.4470348E-04	1.017625	0.1471728E-02	-0.1602399
07112011	10	0.000	0.000	0.000	0.000	0.000	0.000	0.000	0.000	0.000	0.000	0.001	302.074	0.824	NaN	0.2898551	0.1066314E-02	-0.5657041
07112011	11	0.002	0.000	0.001	0.000	0.000	0.000	0.000	0.000	0.000	0.000	0.000	303.022	0.799	0.000000	0.1000000E-10	0.4914256E-14	0.3085422
07112011	12	0.003	0.000	0.001	0.000	0.000	0.000	0.000	0.000	0.001	0.000	0.001	303.830	0.781	0.1740456E-04	0.1569859	0.2114340E-03	-0.1293143
07112011	13	0.002	0.000	0.002	0.000	0.000	0.000	0.000	0.000	0.003	0.000	0.002	304.637	0.743	0.1764297E-04	0.2684564	0.5843692E-03	-0.3378136
07112011	14	0.002	0.000	0.002	0.000	0.000	0.000	0.000	0.000	0.004	0.000	0.002	304.935	0.746	0.2592802E-04	0.2785515	0.4152560E-03	-0.1734103
07112011	15	0.001	0.000	0.002	0.000	0.000	0.000	0.000	0.000	0.004	0.000	0.003	304.594	0.759	0.1317263E-03	0.4071850	0.2358603E-03	0.2371369
07112011	16	0.001	0.000	0.002	0.000	0.000	0.000	0.000	0.000	0.004	0.000	0.003	304.279	0.763	0.1337528E-03	0.4071850	0.2410459E-03	0.2276920
07112011	17	0.001	0.000	0.003	0.000	0.000	0.000	0.000	0.000	0.004	0.000	0.004	303.411	0.763	0.4523993E-04	0.5502370	0.3571784E-03	0.1876646
07112011	18	0.001	0.000	0.003	0.000	0.000	0.000	0.000	0.000	0.005	0.000	0.005	303.480	0.772	0.5424023E-04	0.7258531	0.4685762E-03	0.1900685
07112011	19	0.001	0.000	0.003	0.000	0.000	0.000	0.000	0.000	0.006	0.000	0.005	302.689	0.786	0.1267791E-03	0.7695189	0.5060325E-03	0.1820408
07112011	20	0.002	0.000	0.003	0.000	0.000	0.000	0.000	0.000	0.008	0.000	0.006	301.416	0.836	0.7991195E-03	1.212455	0.4929609E-03	0.3908531
07112011	21	0.002	0.001	0.002	0.000	0.000	0.000	0.000	0.000	0.011	0.000	0.006	300.676	0.852	0.4349947E-03	1.342282	0.7272214E-03	0.2661771
07112011	22	0.004	0.001	0.002	0.000	0.000	0.000	0.001	0.000	0.013	0.000	0.007	300.186	0.862	NaN	1.751990	0.5166398E-03	0.5303438
07112011	23	0.005	0.001	0.002	0.000	0.000	0.000	0.001	0.000	0.014	0.000	0.008	299.788	0.873	NaN	2.114344	0.5527558E-03	0.5826424
07112011	24	0.005	0.001	0.002	0.000	0.000	0.000	0.001	0.000	0.015	0.000	0.008	299.414	0.888	NaN	2.537865	0.4185871E-03	0.7826827
07122011	01	0.005	0.001	0.002	0.000	0.000	0.000	0.001	0.000	0.016	0.000	0.009	299.041	0.905	NaN	3.354562	0.5256784E-03	0.8049156
07122011	02	0.004	0.001	0.002	0.000	0.000	0.000	0.001	0.000	0.017	0.000	0.009	298.812	0.903	NaN	3.051879	0.5150345E-03	0.7727310
07122011	03	0.004	0.001	0.002	0.000	0.001	0.000	0.001	0.000	0.018	0.000	0.010	298.531	0.919	NaN	4.188044	0.5087033E-03	0.9155467
07122011	04	0.004	0.001	0.002	0.000	0.001	0.000	0.001	0.000	0.019	0.000	0.010	298.347	0.927	NaN	4.886387	0.4045767E-03	1.081987
07122011	05	0.003	0.001	0.001	0.000	0.001	0.000	0.001	0.000	0.021	0.000	0.011	298.182	0.934	NaN	5.132864	0.2725388E-03	1.274932
07122011	06	0.002	0.001	0.002	0.000	0.001	0.000	0.001	0.000	0.017	0.000	0.013	297.991	0.942	0.1271188E-01	6.896658	0.2986125E-02	0.3635306
07122011	07	0.001	0.001	0.001	0.000	0.000	0.000	0.001	0.000	0.014	0.000	0.016	298.359	0.943	0.3099203E-02	8.778117	0.5304416E-02	0.2187638
07122011	08	0.000	0.001	0.002	0.000	0.000	0.000	0.000	0.000	0.013	0.000	0.022	299.695	0.899	0.5858541E-03	8.401880	0.1175005E-01	-0.1456631
07122011	09	0.000	0.002	0.003	0.000	0.001	0.000	0.000	0.000	0.013	0.000	0.028	301.188	0.841	0.000000	7.459092	0.1662163E-01	-0.3479877
07122011	10	0.000	0.007	0.008	0.000	0.000	0.000	0.000	0.000	0.012	0.000	0.027	302.854	0.766	0.4589558E-04	5.436473	0.1668650E-01	-0.4870480
07122011	11	0.000	0.008	0.010	0.000	0.000	0.000	0.000	0.000	0.010	0.000	0.024	304.524	0.709	0.1466274E-04	4.016825	0.1515468E-01	-0.5766639
07122011	12	0.000	0.008	0.012	0.000	0.000	0.000	0.000	0.000	0.010	0.000	0.022	306.350	0.641	0.4351139E-05	2.955084	0.1275717E-01	-0.6351844
07122011	13	0.000	0.007	0.013	0.000	0.000	0.000	0.000	0.000	0.009	0.000	0.021	307.848	0.581	0.1609325E-05	2.457829	0.1255812E-01	-0.7083731
07122011	14	0.000	0.008	0.015	0.000	0.000	0.000	0.000	0.000	0.009	0.000	0.021	308.330	0.567	0.1311302E-05	2.399824	0.1252635E-01	-0.7176452
07122011	15	0.000	0.011	0.017	0.000	0.000	0.000	0.000	0.000	0.010	0.000	0.021	307.836	0.581	0.1549721E-05	2.377921	0.1152561E-01	-0.6854663
07122011	16	0.000	0.014	0.019	0.000	0.000	0.000	0.000	0.000	0.011	0.000	0.022	307.077	0.602	0.2264977E-05	2.579870	0.1160209E-01	-0.6529383
07122011	17	0.000	0.016	0.019	0.000	0.000	0.000	0.000	0.000	0.011	0.000	0.022	306.017	0.629	0.3874302E-05	2.795248	0.1171583E-01	-0.6223529
07122011	18	0.000	0.015	0.017	0.000	0.000	0.000	0.000	0.000	0.011	0.000	0.026	304.792	0.659	0.7808208E-05	3.758365	0.1605755E-01	-0.6306805
07122011	19	0.000	0.012	0.015	0.000	0.000	0.000	0.000	0.000	0.012	0.000	0.024	303.452	0.690	0.1239777E-04	3.612795	0.1311310E-01	-0.5598620
07122011	20	0.000	0.008	0.012	0.000	0.000	0.000	0.000	0.000	0.014	0.000	0.022	301.617	0.754	0.3695488E-04	3.750698	0.9440161E-02	-0.4008673
07122011	21	0.000	0.006	0.010	0.000	0.000	0.000	0.001	0.000	0.016	0.000	0.020	300.576	0.787	0.1055002E-03	3.608397	0.5459087E-02	-0.1798056
07122011	22	0.001	0.004	0.008	0.000	0.000	0.000	0.001	0.000	0.016	0.000	0.018	299.946	0.810	0.2069473E-03	3.307528	0.3722766E-02	-0.5136223E-01
07122011	23	0.001	0.003	0.007	0.000	0.000	0.000	0.001	0.000	0.016	0.000	0.016	299.467	0.839	0.4575253E-03	3.381013	0.3307449E-02	0.9553677E-02
07122011	24	0.001	0.002	0.005	0.000	0.000	0.000	0.000	0.000	0.015	0.000	0.015	298.976	0.879	0.7843375E-03	4.195877	0.3194231E-02	0.1184564
07132011	01	0.001	0.001	0.002	0.000	0.000	0.000	0.000	0.000	0.013	0.000	0.013	298.565	0.916	0.1694500E-02	5.326705	0.3054841E-02	0.2414700
07132011	02	0.001	0.001	0.001	0.000	0.000	0.000	0.000	0.000	0.011	0.000	0.012	298.361	0.920	0.1287878E-02	4.958677	0.3239258E-02	0.1849203
07132011	03	0.001	0.001	0.001	0.000	0.000	0.000	0.000	0.000	0.011	0.000	0.011	298.187	0.929	0.1954794E-02	5.138140	0.2604407E-02	0.2950971
07132011	04	0.001	0.001	0.001	0.000	0.000	0.000	0.000	0.000	0.013	0.000	0.011	297.943	0.951	0.5838394E-02	7.086942	0.2035697E-02	0.5417458
07132011	05	0.002	0.001	0.001	0.000	0.001	0.000	0.000	0.000	0.015	0.000	0.013	297.788	0.960	0.000000	10.54708	0.3467939E-02	0.4830610
07132011	06	0.002	0.002	0.001	0.000	0.002	0.000	0.001	0.000	0.018	0.000	0.014	297.734	0.955	0.3109235E-01	11.42236	0.3131142E-02	0.5620530
07132011	07	0.003	0.003	0.002	0.000	0.003	0.000	0.001	0.001	0.021	0.000	0.015	298.449	0.946	0.1212731	9.260659	0.2937340E-02	0.4986877
07132011	08	0.004	0.009	0.006	0.001	0.004	0.000	0.001	0.001	0.024	0.001	0.016	300.128	0.901	0.3691620E-01	4.933860	0.7476264E-04	1.819502
07132011	09	0.003	0.021	0.011	0.001	0.003	0.000	0.001	0.001	0.021	0.000	0.014	301.674	0.846	0.1807129E-01	2.935317	0.6195028E-04	1.675612
07132011	10	0.003	0.024	0.013	0.000	0.001	0.000	0.001	0.001	0.016	0.000	0.011	303.091	0.791	NaN	1.709612	0.9338556E-02	-0.7373822
07132011	11	0.002	0.015	0.014	0.000	0.001	0.000	0.000	0.000	0.014	0.000	0.010	304.401	0.744	0.000000	1.275128	0.2933598E-02	-0.3618470
07132011	12	0.001	0.010	0.016	0.000	0.001	0.000	0.000	0.000	0.013	0.000	0.012	305.676	0.684	0.000000	1.216151	0.1814139E-02	-0.1736828
07132011	13	0.000	0.007	0.017	0.000	0.000	0.000	0.000	0.000	0.012	0.000	0.014	306.449	0.650	0.4768372E-05	1.461170	0.2481195E-02	-0.2299602
07132011	14	0.000	0.005	0.016	0.000	0.000	0.000	0.000	0.000	0.012	0.000	0.014	306.545	0.650	0.4708767E-05	1.461170	0.2479128E-02	-0.2295982
07132011	15	0.000	0.004	0.014	0.000	0.000	0.000	0.000	0.000	0.012	0.000	0.014	305.793	0.667	0.6914139E-05	1.563543	0.2574743E-02	-0.2166240
07132011	16	0.000	0.002	0.011	0.000	0.000	0.000	0.000	0.000	0.010	0.000	0.013	303.467	0.728	0.1668930E-04	1.909384	0.3776940E-02	-0.2962469
07132011	17	0.000	0.001	0.009	0.000	0.000	0.000	0.000	0.000	0.011	0.000	0.013	302.841	0.771	0.4005432E-04	2.138397	0.3141971E-02	-0.1671139
07132011	18	0.001	0.001	0.009	0.000	0.000	0.000	0.000	0.000	0.012	0.000	0.013	301.649	0.801	0.1103878E-03	2.256944	0.2127353E-02	0.2568121E-01
07132011	19	0.001	0.002	0.010	0.000	0.000	0.000	0.000	0.000	0.014	0.000	0.012	300.809	0.836	0.4388690E-03	2.478874	0.1578825E-02	0.1959206
07132011	20	0.002	0.003	0.010	0.000	0.000	0.000	0.000	0.000	0.016	0.000	0.012	299.543	0.858	0.1246333E-02	2.702703	0.1369368E-02	0.2952781
07132011	21	0.002	0.005	0.009	0.000	0.000	0.000	0.001	0.001	0.017	0.000	0.011	298.731	0.889	0.2374244E-01	2.982434	0.2532783E-02	0.7097279E-01
07132011	22	0.002	0.007	0.007	0.000	0.000	0.000	0.001	0.001	0.019	0.000	0.011	298.230	0.906	NaN	3.939525	0.2724689E-02	0.1601270
07132011	23	0.004	0.008	0.006	0.000	0.000	0.000	0.001	0.001	0.018	0.000	0.011	297.941	0.909	NaN	4.104360	0.1743191E-02	0.3719004
07132011	24	0.006	0.007	0.007	0.000	0.001	0.000	0.001	0.001	0.018	0.000	0.010	297.709	0.916	NaN	5.295337	0.6146018E-03	0.9352998
07142011	01	0.006	0.008	0.007	0.000	0.001	0.000	0.001	0.001	0.017	0.000	0.010	297.589	0.912	NaN	4.577897	0.7865516E-03	0.7649388
07142011	02	0.007	0.008	0.008	0.000	0.001	0.000	0.002	0.001	0.016	0.000	0.010	297.462	0.916	NaN	5.489811	0.7459475E-03	0.8668491
07142011	03	0.007	0.009	0.008	0.000	0.001	0.000	0.002	0.001	0.016	0.000	0.010	297.357	0.919	NaN	5.493873	0.7423965E-03	0.8692427
07142011	04	0.006	0.009	0.007	0.000	0.001	0.000	0.002	0.001	0.016	0.000	0.010	297.249	0.925	NaN	5.968225	0.7185184E-03	0.9194073
07142011	05	0.006	0.008	0.006	0.000	0.001	0.000	0.002	0.001	0.015	0.000	0.010	297.180	0.920	NaN	4.879192	0.7104537E-03	0.8368121
07142011	06	0.006	0.008	0.006	0.000	0.001	0.000	0.002	0.001	0.015	0.000	0.011	297.081	0.932	NaN	5.609151	0.1201950E-02	0.6690106
07142011	07	0.006	0.007	0.006	0.000	0.002	0.000	0.003	0.001	0.015	0.000	0.011	297.940	0.907	NaN	4.652061	0.7288306E-03	0.8050188
07142011	08	0.007	0.013	0.012	0.001	0.002	0.000	0.003	0.001	0.017	0.000	0.012	299.884	0.855	0.1643455E-01	2.614383	0.5780182E-04	1.655428
07142011	09	0.016	0.071	0.025	0.000	0.002	0.000	0.003	0.001	0.027	0.001	0.017	301.466	0.810	NaN	4.500117	0.5779944E-02	-0.1086999
07142011	10	0.021	0.118	0.032	0.000	0.002	0.000	0.002	0.001	0.036	0.001	0.021	303.149	0.749	NaN	4.275550	0.7219356E-02	-0.2275065
07142011	11	0.007	0.120	0.041	0.000	0.001	0.000	0.001	0.001	0.046	0.001	0.025	304.661	0.692	NaN	3.077069	0.2953564E-01	-0.9822091
07142011	12	0.001	0.037	0.030	0.000	0.000	0.000	0.001	0.001	0.030	0.000	0.027	304.666	0.681	0.1149774E-03	2.575849	0.2725383E-02	-0.2450714E-01
07142011	13	0.000	0.005	0.015	0.000	0.000	0.000	0.000	0.000	0.016	0.000	0.020	305.646	0.651	0.6198883E-05	2.182968	0.4663686E-02	-0.3296819
07142011	14	0.000	0.002	0.009	0.000	0.000	0.000	0.000	0.000	0.011	0.000	0.015	305.746	0.652	0.4112720E-05	1.720861	0.4483444E-02	-0.4158658
07142011	15	0.000	0.001	0.008	0.000	0.000	0.000	0.000	0.000	0.009	0.000	0.012	305.004	0.675	0.5781651E-05	1.497715	0.3484825E-02	-0.3667519
07142011	16	0.000	0.001	0.007	0.000	0.000	0.000	0.000	0.000	0.007	0.000	0.010	303.906	0.712	0.7987022E-05	1.426849	0.3495422E-02	-0.3891217
07142011	17	0.000	0.002	0.006	0.000	0.000	0.000	0.000	0.000	0.006	0.000	0.009	302.994	0.749	0.1400709E-04	1.509817	0.3561447E-02	-0.3727021
07142011	18	0.000	0.004	0.007	0.000	0.000	0.000	0.000	0.000	0.006	0.000	0.009	302.169	0.795	0.3367662E-04	1.845956	0.3734376E-02	-0.3059967
07142011	19	0.000	0.005	0.009	0.000	0.000	0.000	0.000	0.000	0.007	0.000	0.010	300.974	0.852	0.1038909E-03	2.595208	0.4109002E-02	-0.1995641
07142011	20	0.001	0.007	0.010	0.000	0.000	0.000	0.000	0.000	0.008	0.000	0.010	300.034	0.896	0.4597902E-03	3.460484	0.2987259E-02	0.6386398E-01
07142011	21	0.001	0.007	0.012	0.000	0.000	0.000	0.000	0.000	0.009	0.000	0.010	299.486	0.918	0.9638667E-03	4.132231	0.2625456E-02	0.1969799
07142011	22	0.001	0.008	0.012	0.000	0.000	0.000	0.000	0.000	0.009	0.000	0.011	298.796	0.940	0.1755953E-02	6.140156	0.3749952E-02	0.2141537
07142011	23	0.001	0.010	0.011	0.000	0.000	0.000	0.000	0.001	0.011	0.000	0.012	298.214	0.960	0.5508840E-02	8.989952	0.3896859E-02	0.3630428
07142011	24	0.001	0.013	0.010	0.000	0.000	0.000	0.001	0.001	0.015	0.000	0.015	297.883	0.970	0.1556343E-01	15.57471	0.4447273E-02	0.5443262
07152011	01	0.002	0.015	0.010	0.000	0.001	0.000	0.001	0.002	0.019	0.000	0.018	297.703	0.971	0.2883869E-01	17.82277	0.4197596E-02	0.6279746
07152011	02	0.002	0.018	0.010	0.000	0.001	0.000	0.002	0.003	0.025	0.000	0.022	297.591	0.968	0.4684150E-01	21.23274	0.4384093E-02	0.6851263
07152011	03	0.002	0.019	0.010	0.000	0.001	0.001	0.002	0.004	0.031	0.000	0.027	297.527	0.963	0.4368991E-01	18.50642	0.4513403E-02	0.6128183
07152011	04	0.003	0.019	0.010	0.000	0.002	0.001	0.002	0.004	0.038	0.000	0.032	297.476	0.960	0.5675697E-01	22.64033	0.5115903E-02	0.6459605
07152011	05	0.003	0.017	0.009	0.000	0.002	0.001	0.003	0.004	0.046	0.000	0.036	297.441	0.956	0.7991230E-01	26.06594	0.5382904E-02	0.6850568
07152011	06	0.004	0.014	0.008	0.001	0.002	0.001	0.003	0.004	0.055	0.000	0.040	297.428	0.952	0.000000	23.30443	0.4995304E-02	0.6688766
07152011	07	0.005	0.011	0.007	0.001	0.003	0.001	0.003	0.004	0.063	0.000	0.042	298.255	0.935	0.000000	20.64353	0.4821673E-02	0.6315862
07152011	08	0.005	0.016	0.015	0.001	0.003	0.001	0.003	0.003	0.064	0.001	0.043	299.512	0.873	0.000000	10.16761	0.5420481E-02	0.2731811
07152011	09	0.001	0.016	0.024	0.000	0.001	0.000	0.001	0.001	0.035	0.000	0.034	300.119	0.844	0.9619594E-03	6.966652	0.6053954E-02	0.6098498E-01
07152011	10	0.001	0.005	0.016	0.000	0.001	0.000	0.001	0.001	0.022	0.000	0.026	301.467	0.811	0.2560616E-03	4.607758	0.4965430E-02	-0.3246719E-01
07152011	11	0.000	0.002	0.013	0.000	0.001	0.000	0.000	0.000	0.017	0.000	0.021	301.020	0.793	0.000000	3.773686	0.5737857E-02	-0.1819839
07152011	12	0.001	0.001	0.009	0.000	0.001	0.000	0.001	0.001	0.018	0.000	0.019	302.296	0.776	0.2171993E-03	2.784404	0.2890309E-02	-0.1621206E-01
07152011	13	0.001	0.001	0.010	0.000	0.000	0.000	0.000	0.001	0.015	0.000	0.017	303.165	0.741	0.5054474E-04	2.110818	0.2568736E-02	-0.8526854E-01
07152011	14	0.000	0.001	0.009	0.000	0.000	0.000	0.000	0.000	0.011	0.000	0.016	302.758	0.747	0.2616644E-04	2.654104	0.6023709E-02	-0.3559461
07152011	15	0.000	0.001	0.007	0.000	0.000	0.000	0.000	0.000	0.009	0.000	0.016	302.106	0.773	0.3236532E-04	3.048299	0.8074014E-02	-0.4230319
07152011	16	0.000	0.002	0.005	0.000	0.000	0.000	0.000	0.000	0.008	0.000	0.016	301.591	0.800	0.5078316E-04	3.533661	0.9189260E-02	-0.4150556
07152011	17	0.000	0.003	0.005	0.000	0.000	0.000	0.000	0.000	0.007	0.000	0.017	300.943	0.823	0.7200241E-04	4.244705	0.1132565E-01	-0.4262155
07152011	18	0.000	0.005	0.006	0.000	0.000	0.000	0.000	0.000	0.006	0.000	0.017	300.144	0.859	0.1428127E-03	5.299746	0.1248475E-01	-0.3721249
07152011	19	0.000	0.006	0.005	0.000	0.000	0.000	0.000	0.000	0.006	0.000	0.019	299.771	0.879	0.2304912E-03	6.773040	0.1474158E-01	-0.3377604
07152011	20	0.000	0.003	0.003	0.000	0.000	0.000	0.000	0.000	0.006	0.000	0.017	298.807	0.909	0.4819632E-03	7.588077	0.1287559E-01	-0.2296355
07152011	21	0.000	0.004	0.003	0.000	0.000	0.000	0.000	0.000	0.006	0.000	0.014	298.226	0.945	0.1485288E-02	10.24658	0.9977281E-02	0.1156678E-01
07152011	22	0.000	0.007	0.003	0.000	0.000	0.000	0.000	0.000	0.007	0.000	0.014	297.970	0.958	0.2578199E-02	12.46847	0.9285755E-02	0.1279961
07152011	23	0.000	0.009	0.002	0.000	0.000	0.000	0.000	0.000	0.008	0.000	0.015	297.822	0.960	0.2929628E-02	13.28815	0.9544696E-02	0.1437023
07152011	24	0.000	0.007	0.001	0.000	0.001	0.000	0.001	0.000	0.008	0.000	0.013	297.680	0.967	0.6404042E-02	14.93774	0.6532709E-02	0.3591916
07162011	01	0.001	0.005	0.001	0.000	0.001	0.000	0.001	0.000	0.007	0.000	0.009	297.578	0.970	0.8488655E-02	10.04500	0.3199549E-02	0.4968611
07162011	02	0.001	0.003	0.001	0.000	0.001	0.000	0.001	0.000	0.005	0.000	0.004	297.689	0.958	0.6180716E-01	3.357843	0.1330122E-02	0.4021688
07162011	03	0.002	0.001	0.001	0.000	0.001	0.000	0.001	0.000	0.004	0.000	0.003	297.465	0.966	NaN	3.668566	0.2255362E-03	1.211280
07162011	04	0.003	0.001	0.001	0.000	0.001	0.000	0.001	0.000	0.003	0.000	0.003	297.345	0.966	NaN	3.674865	0.2239089E-03	1.215170
07162011	05	0.003	0.001	0.001	0.000	0.001	0.000	0.001	0.000	0.003	0.000	0.003	297.188	0.969	NaN	3.683058	0.2217917E-03	1.220263
07162011	06	0.002	0.002	0.002	0.000	0.001	0.000	0.001	0.000	0.004	0.000	0.003	297.082	0.960	NaN	3.099899	0.3889505E-03	0.9014532
07162011	07	0.001	0.003	0.003	0.000	0.001	0.000	0.001	0.000	0.005	0.000	0.004	297.753	0.931	0.2281678E-01	1.861836	0.1320962E-02	0.1490511
07162011	08	0.001	0.002	0.004	0.000	0.000	0.000	0.000	0.000	0.005	0.000	0.004	298.688	0.906	0.1194000E-02	1.388889	0.4639944E-03	0.4761547
07162011	09	0.001	0.001	0.005	0.000	0.000	0.000	0.000	0.000	0.004	0.000	0.004	299.594	0.882	0.3079772E-03	1.088532	0.6074946E-03	0.2532988
07162011	10	0.001	0.000	0.004	0.000	0.000	0.000	0.000	0.000	0.003	0.000	0.003	299.786	0.864	0.1989007E-03	0.6949492	0.3969742E-03	0.2431908
07162011	11	0.001	0.001	0.004	0.000	0.000	0.000	0.000	0.000	0.003	0.000	0.003	301.227	0.822	0.1006126E-03	0.5444204	0.3495806E-03	0.1923871
07162011	12	0.001	0.002	0.003	0.000	0.000	0.000	0.000	0.000	0.003	0.000	0.003	301.841	0.809	0.8565187E-04	0.5169299	0.3321955E-03	0.1920379
07162011	13	0.000	0.003	0.003	0.000	0.000	0.000	0.000	0.000	0.003	0.000	0.005	301.870	0.810	0.2050400E-04	1.104548	0.2406048E-02	-0.3381195
07162011	14	0.000	0.003	0.003	0.000	0.000	0.000	0.000	0.000	0.004	0.000	0.007	302.317	0.810	0.2664328E-04	1.565582	0.3545173E-02	-0.3549618
07162011	15	0.000	0.002	0.003	0.000	0.000	0.000	0.000	0.000	0.005	0.000	0.009	302.002	0.824	0.4070997E-04	2.120959	0.4729231E-02	-0.3482583
07162011	16	0.000	0.003	0.004	0.000	0.000	0.000	0.000	0.000	0.005	0.000	0.010	301.610	0.839	0.6115437E-04	2.654873	0.5848567E-02	-0.3430057
07162011	17	0.000	0.002	0.005	0.000	0.000	0.000	0.000	0.000	0.005	0.000	0.009	301.072	0.858	0.8893013E-04	2.616222	0.4879046E-02	-0.2706603
07162011	18	0.001	0.001	0.005	0.000	0.000	0.000	0.000	0.000	0.005	0.000	0.007	300.447	0.877	0.1857877E-03	2.085540	0.2167398E-02	-0.1672004E-01
07162011	19	0.001	0.000	0.004	0.000	0.000	0.000	0.000	0.000	0.004	0.000	0.004	299.681	0.896	0.4550815E-03	1.293896	0.6319485E-03	0.3112179
07162011	20	0.001	0.000	0.003	0.000	0.000	0.000	0.000	0.000	0.004	0.000	0.003	298.834	0.905	0.1619101E-02	1.058081	0.2471209E-03	0.6316093
07162011	21	0.001	0.000	0.003	0.000	0.000	0.000	0.000	0.000	0.004	0.000	0.004	298.221	0.917	0.8033514E-03	1.607696	0.6994231E-03	0.3614641
07162011	22	0.001	0.000	0.003	0.000	0.000	0.000	0.000	0.000	0.004	0.000	0.004	297.730	0.915	0.8283257E-03	1.607696	0.7063406E-03	0.3571898
07162011	23	0.001	0.000	0.003	0.000	0.000	0.000	0.000	0.000	0.005	0.000	0.004	297.064	0.930	0.2137184E-02	1.785714	0.4749665E-03	0.5751490
07162011	24	0.001	0.000	0.003	0.000	0.000	0.000	0.000	0.000	0.006	0.000	0.005	296.489	0.943	0.2885997E-02	2.651711	0.7468222E-03	0.5503090
07172011	01	0.001	0.000	0.004	0.000	0.000	0.000	0.000	0.000	0.007	0.000	0.005	296.048	0.928	0.3912866E-02	2.253004	0.5104295E-03	0.6448262
07172011	02	0.001	0.001	0.004	0.000	0.000	0.000	0.000	0.000	0.008	0.000	0.006	295.572	0.932	0.3513098E-02	2.678571	0.7619864E-03	0.5459560
07172011	03	0.002	0.001	0.003	0.000	0.001	0.000	0.000	0.000	0.009	0.000	0.006	295.509	0.931	0.2127886E-04	2.804835	0.1591573E-02	0.2460806
07172011	04	0.002	0.001	0.003	0.000	0.001	0.000	0.001	0.000	0.011	0.000	0.007	295.503	0.934	NaN	3.293708	0.1173356E-02	0.4482554
07172011	05	0.002	0.001	0.003	0.000	0.001	0.000	0.001	0.000	0.012	0.000	0.007	295.635	0.925	NaN	3.534395	0.8349859E-03	0.6266359
07172011	06	0.002	0.002	0.004	0.000	0.001	0.000	0.001	0.000	0.013	0.000	0.008	295.670	0.932	NaN	3.799198	0.1605444E-02	0.3740967
07172011	07	0.002	0.002	0.005	0.000	0.001	0.000	0.000	0.000	0.011	0.000	0.007	296.276	0.929	0.2145767E-04	3.272125	0.1814179E-02	0.2561498
07172011	08	0.001	0.000	0.007	0.000	0.000	0.000	0.000	0.000	0.010	0.000	0.008	297.507	0.891	0.1171708E-02	2.325907	0.1139492E-02	0.3098809
07172011	09	0.001	0.000	0.008	0.000	0.000	0.000	0.000	0.000	0.009	0.000	0.008	297.751	0.866	0.5769134E-03	2.017994	0.1286598E-02	0.1954770
07172011	10	0.001	0.000	0.008	0.000	0.000	0.000	0.000	0.000	0.010	0.000	0.009	299.769	0.797	0.1844764E-03	1.502976	0.1149322E-02	0.1165102
07172011	11	0.001	0.000	0.009	0.000	0.000	0.000	0.000	0.000	0.010	0.000	0.009	300.103	0.765	0.1235008E-03	1.301330	0.1025515E-02	0.1034453
07172011	12	0.001	0.001	0.009	0.000	0.000	0.000	0.000	0.000	0.010	0.000	0.009	301.623	0.716	0.6425381E-04	1.048297	0.7638602E-03	0.1374705
07172011	13	0.001	0.001	0.012	0.000	0.000	0.000	0.000	0.000	0.009	0.000	0.008	302.406	0.686	0.4351139E-04	0.8219600	0.5796971E-03	0.1516495
07172011	14	0.001	0.001	0.012	0.000	0.000	0.000	0.000	0.000	0.008	0.000	0.008	302.666	0.678	0.2419949E-04	0.8094420	0.5004085E-03	0.2088611
07172011	15	0.001	0.001	0.011	0.000	0.000	0.000	0.000	0.000	0.008	0.000	0.007	302.252	0.686	0.4255772E-04	0.7143173	0.5430134E-03	0.1190806
07172011	16	0.001	0.001	0.009	0.000	0.000	0.000	0.000	0.000	0.008	0.000	0.007	301.019	0.707	0.5537271E-04	0.7742788	0.6422865E-03	0.8116859E-01
07172011	17	0.002	0.001	0.007	0.000	0.000	0.000	0.000	0.000	0.010	0.000	0.007	301.437	0.708	0.2824068E-03	0.7865102	0.7008685E-03	0.5006784E-01
07172011	18	0.002	0.001	0.007	0.000	0.001	0.000	0.000	0.000	0.010	0.000	0.007	300.549	0.725	0.000000	0.8945295	0.2159645E-02	-0.3827878
07172011	19	0.002	0.002	0.007	0.001	0.001	0.000	0.001	0.001	0.011	0.000	0.008	299.549	0.752	0.2980232E-04	1.258851	0.2297029E-02	-0.2611922
07172011	20	0.002	0.002	0.006	0.001	0.001	0.000	0.001	0.001	0.013	0.000	0.010	298.525	0.774	0.000000	1.334516	0.2184913E-02	-0.2141103
07172011	21	0.002	0.001	0.004	0.001	0.001	0.000	0.001	0.001	0.015	0.000	0.011	297.966	0.795	0.000000	1.694641	0.2317636E-02	-0.1359674
07172011	22	0.002	0.002	0.004	0.001	0.001	0.000	0.001	0.001	0.018	0.000	0.013	297.563	0.818	0.000000	2.220259	0.2591790E-02	-0.6719609E-01
07172011	23	0.002	0.002	0.004	0.001	0.001	0.000	0.001	0.001	0.020	0.000	0.015	297.234	0.839	0.000000	2.849090	0.2893004E-02	-0.6642943E-02
07172011	24	0.002	0.002	0.004	0.001	0.001	0.000	0.001	0.001	0.022	0.000	0.016	296.890	0.870	0.000000	3.731173	0.2993761E-02	0.9562818E-01
07182011	01	0.002	0.003	0.004	0.001	0.001	0.000	0.001	0.001	0.023	0.000	0.017	296.674	0.886	0.000000	4.650498	0.3142915E-02	0.1701668
07182011	02	0.002	0.004	0.004	0.001	0.001	0.000	0.001	0.001	0.024	0.000	0.018	296.426	0.908	0.000000	5.979012	0.3304930E-02	0.2574671
07182011	03	0.003	0.004	0.004	0.001	0.001	0.001	0.001	0.002	0.025	0.000	0.018	296.288	0.910	0.000000	5.791177	0.2706109E-02	0.3304215
07182011	04	0.003	0.005	0.005	0.001	0.002	0.001	0.002	0.002	0.026	0.000	0.019	296.215	0.899	0.000000	6.214554	0.2880020E-02	0.3340144
07182011	05	0.003	0.006	0.005	0.001	0.002	0.001	0.002	0.002	0.027	0.000	0.019	296.067	0.900	0.000000	6.870292	0.3037968E-02	0.3543920
07182011	06	0.004	0.008	0.006	0.001	0.003	0.001	0.002	0.003	0.027	0.001	0.019	295.961	0.898	0.4783207E-01	5.237659	0.1056304E-03	1.695348
07182011	07	0.005	0.012	0.008	0.001	0.003	0.001	0.003	0.003	0.025	0.001	0.019	296.407	0.884	0.3644133E-01	4.414407	0.1040388E-03	1.627677
07182011	08	0.004	0.027	0.018	0.001	0.003	0.001	0.002	0.003	0.023	0.001	0.017	297.777	0.841	0.1716715E-01	3.004560	0.1082151E-03	1.443493
07182011	09	0.003	0.036	0.021	0.000	0.003	0.000	0.002	0.001	0.017	0.001	0.012	299.494	0.775	NaN	2.008688	0.1644437E-01	-0.9131048
07182011	10	0.003	0.023	0.016	0.000	0.002	0.000	0.001	0.001	0.013	0.000	0.009	301.044	0.714	NaN	1.158737	0.1149275E-01	-0.9964390
07182011	11	0.002	0.013	0.013	0.000	0.001	0.000	0.001	0.001	0.013	0.000	0.009	302.559	0.657	NaN	0.8624018	0.1081281E-01	-1.098229
07182011	12	0.001	0.008	0.012	0.000	0.001	0.000	0.001	0.001	0.013	0.000	0.011	303.816	0.612	0.7450581E-04	0.7533429	0.2418266E-02	-0.5065114
07182011	13	0.001	0.005	0.012	0.000	0.001	0.000	0.001	0.000	0.015	0.000	0.013	304.995	0.571	0.3147125E-04	0.8503604	0.1667998E-02	-0.2925926
07182011	14	0.001	0.004	0.011	0.000	0.001	0.000	0.001	0.000	0.018	0.000	0.017	305.795	0.534	0.1746416E-04	0.9846008	0.1160744E-02	-0.7147636E-01
07182011	15	0.001	0.004	0.012	0.000	0.001	0.000	0.000	0.000	0.021	0.000	0.020	305.555	0.528	0.000000	1.185466	0.1072053E-02	0.4367274E-01
07182011	16	0.001	0.004	0.012	0.000	0.001	0.000	0.000	0.001	0.023	0.000	0.022	305.372	0.533	0.1668930E-04	1.234004	0.1226807E-02	0.2540618E-02
07182011	17	0.001	0.004	0.011	0.000	0.001	0.000	0.001	0.001	0.025	0.000	0.023	304.872	0.544	0.2831221E-04	1.306647	0.1560591E-02	-0.7713071E-01
07182011	18	0.001	0.003	0.010	0.000	0.001	0.000	0.001	0.001	0.027	0.000	0.026	304.269	0.548	0.2759695E-04	1.558566	0.1415699E-02	0.4175451E-01
07182011	19	0.001	0.003	0.010	0.000	0.001	0.000	0.001	0.001	0.028	0.000	0.023	303.561	0.545	0.4482269E-04	1.319368	0.2512680E-02	-0.2797714
07182011	20	0.003	0.003	0.009	0.000	0.001	0.000	0.001	0.002	0.031	0.000	0.022	301.938	0.591	0.5193949E-03	1.533868	0.4423831E-02	-0.4600106
07182011	21	0.005	0.004	0.008	0.000	0.001	0.001	0.002	0.003	0.034	0.000	0.022	300.650	0.621	NaN	1.919408	0.2277125E-02	-0.7421942E-01
07182011	22	0.011	0.005	0.008	0.000	0.001	0.001	0.002	0.003	0.032	0.000	0.021	299.623	0.664	NaN	2.195415	0.7052516E-03	0.4931726
07182011	23	0.015	0.006	0.009	0.000	0.001	0.001	0.002	0.004	0.030	0.000	0.021	298.792	0.714	NaN	2.582611	0.3876854E-03	0.8235795
07182011	24	0.018	0.007	0.010	0.000	0.002	0.001	0.003	0.005	0.029	0.000	0.022	298.043	0.773	NaN	3.377725	0.2591017E-03	1.115154
07192011	01	0.018	0.008	0.011	0.000	0.002	0.001	0.003	0.005	0.028	0.001	0.022	297.354	0.838	NaN	5.085974	0.3262697E-03	1.192797
07192011	02	0.015	0.009	0.012	0.000	0.002	0.001	0.003	0.006	0.030	0.001	0.024	296.859	0.882	NaN	7.127963	0.5844528E-03	1.086216
07192011	03	0.013	0.011	0.012	0.000	0.002	0.001	0.003	0.006	0.033	0.001	0.025	296.578	0.899	NaN	8.837413	0.6988096E-03	1.101966
07192011	04	0.011	0.012	0.013	0.000	0.002	0.001	0.004	0.006	0.035	0.001	0.027	296.373	0.906	NaN	10.27888	0.1420717E-02	0.8594382
07192011	05	0.010	0.013	0.013	0.000	0.002	0.001	0.004	0.006	0.037	0.001	0.028	296.207	0.911	NaN	10.44701	0.1704251E-02	0.7874584
07192011	06	0.010	0.014	0.013	0.000	0.002	0.001	0.004	0.007	0.037	0.001	0.028	296.074	0.918	NaN	11.80093	0.1167006E-02	1.004843
07192011	07	0.012	0.015	0.013	0.000	0.002	0.001	0.004	0.007	0.037	0.001	0.028	296.757	0.924	NaN	12.06784	0.8533843E-03	1.150485
07192011	08	0.009	0.013	0.014	0.000	0.002	0.001	0.004	0.007	0.037	0.001	0.029	299.118	0.838	NaN	5.774681	0.2730550E-02	0.3252778
07192011	09	0.002	0.043	0.028	0.000	0.002	0.001	0.003	0.005	0.041	0.000	0.035	300.990	0.767	0.1915872E-02	4.306206	0.4993919E-02	-0.6434675E-01
07192011	10	0.001	0.137	0.036	0.000	0.002	0.001	0.002	0.003	0.038	0.000	0.040	302.824	0.678	0.1931190E-03	3.822996	0.3277668E-02	0.6683892E-01
07192011	11	0.000	0.265	0.047	0.000	0.001	0.000	0.001	0.002	0.034	0.000	0.045	304.104	0.620	0.9894371E-05	4.148831	0.8452574E-02	-0.3090633
07192011	12	0.000	0.225	0.041	0.000	0.001	0.000	0.001	0.002	0.032	0.000	0.045	305.167	0.576	0.4172325E-05	3.805273	0.9997804E-02	-0.4195188
07192011	13	0.000	0.161	0.034	0.000	0.001	0.000	0.001	0.001	0.031	0.000	0.045	306.473	0.536	0.1907349E-05	3.588413	0.1173805E-01	-0.5146934
07192011	14	0.000	0.100	0.026	0.000	0.001	0.000	0.001	0.001	0.023	0.000	0.045	307.162	0.520	0.1370907E-05	3.999774	0.1980674E-01	-0.6947776
07192011	15	0.000	0.054	0.021	0.000	0.000	0.000	0.000	0.001	0.017	0.000	0.052	306.993	0.534	0.2324581E-05	5.674625	0.3544445E-01	-0.7956111
07192011	16	0.000	0.033	0.019	0.000	0.000	0.000	0.000	0.001	0.015	0.000	0.057	306.496	0.561	0.4112720E-05	6.954657	0.4289861E-01	-0.7901675
07192011	17	0.000	0.029	0.017	0.000	0.000	0.000	0.000	0.001	0.015	0.000	0.057	305.752	0.591	0.6437302E-05	7.447228	0.4310692E-01	-0.7625524
07192011	18	0.000	0.026	0.013	0.000	0.000	0.000	0.000	0.001	0.016	0.000	0.055	304.880	0.624	0.9536743E-05	7.582610	0.4021683E-01	-0.7245890
07192011	19	0.000	0.025	0.010	0.000	0.000	0.000	0.001	0.001	0.017	0.000	0.052	303.909	0.658	0.1639128E-04	7.685766	0.3527129E-01	-0.6617342
07192011	20	0.000	0.020	0.007	0.000	0.000	0.000	0.001	0.001	0.021	0.000	0.051	302.283	0.718	0.4297495E-04	8.543836	0.3078892E-01	-0.5567415
07192011	21	0.000	0.015	0.005	0.000	0.000	0.000	0.001	0.002	0.025	0.000	0.051	301.056	0.760	0.9053946E-04	9.159049	0.2635972E-01	-0.4590904
07192011	22	0.000	0.013	0.004	0.001	0.000	0.000	0.001	0.002	0.028	0.000	0.051	300.184	0.792	0.000000	9.996013	0.2404675E-01	-0.3812295
07192011	23	0.000	0.011	0.004	0.001	0.001	0.000	0.001	0.002	0.030	0.000	0.050	299.487	0.822	0.000000	10.83888	0.2098193E-01	-0.2868612
07192011	24	0.000	0.010	0.003	0.001	0.001	0.000	0.001	0.002	0.031	0.000	0.048	298.927	0.851	0.000000	11.90866	0.1908074E-01	-0.2047323
07202011	01	0.000	0.009	0.003	0.001	0.001	0.000	0.001	0.002	0.030	0.000	0.045	298.484	0.876	0.000000	13.39450	0.1770026E-01	-0.1210530
07202011	02	0.000	0.007	0.002	0.001	0.001	0.000	0.001	0.002	0.030	0.000	0.042	298.084	0.899	0.000000	14.36697	0.1542724E-01	-0.3092295E-01
07202011	03	0.001	0.005	0.002	0.001	0.001	0.000	0.001	0.002	0.030	0.000	0.039	297.833	0.909	0.000000	14.23591	0.1249278E-01	0.5672621E-01
07202011	04	0.001	0.004	0.002	0.001	0.002	0.000	0.001	0.002	0.030	0.000	0.035	297.641	0.915	0.000000	13.65837	0.9252219E-02	0.1691529
07202011	05	0.001	0.003	0.002	0.001	0.002	0.000	0.001	0.002	0.032	0.000	0.033	297.493	0.919	0.000000	12.64139	0.7374033E-02	0.2340896
07202011	06	0.002	0.003	0.001	0.001	0.003	0.000	0.001	0.002	0.034	0.000	0.031	297.393	0.923	0.000000	11.56722	0.5684917E-02	0.3085047
07202011	07	0.002	0.003	0.001	0.001	0.004	0.001	0.002	0.003	0.038	0.000	0.031	298.153	0.909	0.000000	9.895846	0.4474627E-02	0.3446961
07202011	08	0.003	0.006	0.003	0.001	0.004	0.001	0.002	0.003	0.041	0.000	0.032	299.953	0.861	0.000000	6.808247	0.4700826E-02	0.1608612
07202011	09	0.004	0.016	0.010	0.001	0.003	0.001	0.001	0.003	0.046	0.000	0.031	301.229	0.827	0.2077818E-03	5.646111	0.4678553E-02	0.8163787E-01
07202011	10	0.003	0.020	0.013	0.000	0.001	0.000	0.001	0.002	0.042	0.000	0.029	302.389	0.793	0.2656937E-02	4.251089	0.5206307E-02	-0.8802962E-01
07202011	11	0.001	0.019	0.014	0.000	0.001	0.000	0.001	0.001	0.033	0.000	0.028	303.502	0.760	0.3966689E-03	3.688913	0.4088752E-02	-0.4469236E-01
07202011	12	0.001	0.007	0.013	0.000	0.000	0.000	0.000	0.001	0.024	0.000	0.027	303.004	0.774	0.1122355E-03	4.001529	0.4833343E-02	-0.8202157E-01
07202011	13	0.000	0.002	0.010	0.000	0.000	0.000	0.000	0.001	0.017	0.000	0.025	303.939	0.747	0.3671646E-04	3.936131	0.8789157E-02	-0.3488777
07202011	14	0.000	0.001	0.009	0.000	0.000	0.000	0.000	0.000	0.014	0.000	0.023	304.619	0.723	0.1817942E-04	3.581874	0.1012764E-01	-0.4513980
07202011	15	0.000	0.000	0.008	0.000	0.000	0.000	0.000	0.000	0.012	0.000	0.020	304.595	0.715	0.1573563E-04	3.129951	0.8980370E-02	-0.4577568
07202011	16	0.000	0.000	0.006	0.000	0.000	0.000	0.000	0.000	0.009	0.000	0.016	302.969	0.739	0.1901388E-04	2.736008	0.7917078E-02	-0.4614476
07202011	17	0.000	0.000	0.005	0.000	0.000	0.000	0.000	0.000	0.009	0.000	0.015	303.126	0.769	0.2902746E-04	2.806168	0.6977997E-02	-0.3956172
07202011	18	0.000	0.000	0.004	0.000	0.000	0.000	0.000	0.000	0.008	0.000	0.015	302.067	0.794	0.4047155E-04	3.135786	0.8072422E-02	-0.4106575
07202011	19	0.000	0.001	0.003	0.000	0.000	0.000	0.000	0.000	0.008	0.000	0.014	301.458	0.817	0.6783009E-04	3.277592	0.7176005E-02	-0.3403279
07202011	20	0.000	0.001	0.003	0.000	0.000	0.000	0.000	0.000	0.009	0.000	0.015	300.310	0.840	0.1175404E-03	3.832400	0.7463600E-02	-0.2894776
07202011	21	0.001	0.001	0.002	0.000	0.000	0.000	0.000	0.000	0.012	0.000	0.015	299.562	0.861	0.2954006E-03	3.875348	0.4421812E-02	-0.5728956E-01
07202011	22	0.001	0.001	0.002	0.000	0.000	0.000	0.000	0.000	0.014	0.000	0.014	299.100	0.870	0.5716681E-03	3.626798	0.2771417E-02	0.1168215
07202011	23	0.001	0.001	0.002	0.000	0.000	0.000	0.000	0.000	0.015	0.000	0.014	298.874	0.876	0.8991361E-03	3.871979	0.2625885E-02	0.1686572
07202011	24	0.001	0.001	0.002	0.000	0.000	0.000	0.000	0.000	0.015	0.000	0.014	298.694	0.885	0.1092851E-02	4.200961	0.2695533E-02	0.1927040
07212011	01	0.001	0.001	0.002	0.000	0.000	0.000	0.000	0.000	0.015	0.000	0.014	298.475	0.897	0.1345694E-02	4.594481	0.2767546E-02	0.2201417
07212011	02	0.001	0.001	0.003	0.000	0.000	0.000	0.000	0.000	0.015	0.000	0.014	298.233	0.906	0.1692057E-02	5.092593	0.2848279E-02	0.2523565
07212011	03	0.001	0.001	0.003	0.000	0.000	0.000	0.000	0.000	0.014	0.000	0.014	297.953	0.916	0.1823545E-02	5.739927	0.3336427E-02	0.2356248
07212011	04	0.001	0.001	0.003	0.000	0.000	0.000	0.000	0.000	0.014	0.000	0.014	297.725	0.923	0.1856267E-02	5.739927	0.3351300E-02	0.2336931
07212011	05	0.001	0.002	0.003	0.000	0.000	0.000	0.000	0.000	0.014	0.000	0.014	297.578	0.929	0.2475977E-02	6.553235	0.3473880E-02	0.2756409
07212011	06	0.001	0.003	0.004	0.000	0.000	0.000	0.001	0.000	0.015	0.000	0.014	297.506	0.932	0.3551066E-02	6.466802	0.3691328E-02	0.2435070
07212011	07	0.001	0.005	0.004	0.000	0.000	0.000	0.001	0.000	0.015	0.000	0.014	297.698	0.936	0.4691601E-02	7.543767	0.3823496E-02	0.2951276
07212011	08	0.001	0.009	0.005	0.000	0.000	0.000	0.000	0.000	0.011	0.000	0.015	299.518	0.885	0.4689097E-03	4.924955	0.5425242E-02	-0.4201685E-01
07212011	09	0.000	0.033	0.012	0.000	0.000	0.000	0.000	0.000	0.008	0.000	0.026	300.404	0.871	0.2453327E-03	8.736307	0.2025213E-01	-0.3651428
07212011	10	0.000	0.029	0.015	0.000	0.000	0.000	0.000	0.000	0.008	0.000	0.031	301.442	0.835	0.1502633E-03	8.979658	0.2533016E-01	-0.4503781
07212011	11	0.000	0.020	0.014	0.000	0.000	0.000	0.000	0.000	0.009	0.000	0.032	302.698	0.781	0.5710125E-04	7.167324	0.2501314E-01	-0.5428113
07212011	12	0.000	0.013	0.013	0.000	0.000	0.000	0.000	0.000	0.008	0.000	0.031	303.548	0.741	0.2926588E-04	6.143904	0.2473028E-01	-0.6047847
07212011	13	0.000	0.005	0.010	0.000	0.000	0.000	0.000	0.000	0.006	0.000	0.026	303.611	0.722	0.1853704E-04	4.912256	0.2140122E-01	-0.6391575
07212011	14	0.000	0.002	0.006	0.000	0.000	0.000	0.000	0.000	0.005	0.000	0.021	303.777	0.715	0.1484156E-04	3.954076	0.1712043E-01	-0.6364697
07212011	15	0.000	0.001	0.005	0.000	0.000	0.000	0.000	0.000	0.004	0.000	0.018	303.658	0.718	0.1275539E-04	3.414307	0.1496965E-01	-0.6419090
07212011	16	0.000	0.001	0.004	0.000	0.000	0.000	0.000	0.000	0.003	0.000	0.015	303.643	0.719	0.1055002E-04	2.874538	0.1281283E-01	-0.6490769
07212011	17	0.000	0.001	0.003	0.000	0.000	0.000	0.000	0.000	0.003	0.000	0.012	303.447	0.716	0.8702278E-05	2.246923	0.9649104E-02	-0.6328989
07212011	18	0.000	0.001	0.003	0.000	0.000	0.000	0.000	0.000	0.003	0.000	0.011	303.143	0.710	0.7271767E-05	1.978978	0.8589342E-02	-0.6375189
07212011	19	0.000	0.000	0.002	0.000	0.000	0.000	0.000	0.000	0.004	0.000	0.010	302.046	0.742	0.1156330E-04	1.855138	0.6593707E-02	-0.5507534
07212011	20	0.000	0.000	0.002	0.000	0.000	0.000	0.000	0.000	0.004	0.000	0.009	300.749	0.783	0.2139807E-04	1.879921	0.5639499E-02	-0.4771008
07212011	21	0.000	0.000	0.001	0.000	0.000	0.000	0.000	0.000	0.005	0.000	0.008	299.964	0.800	0.3403425E-04	1.672345	0.3694244E-02	-0.3441996
07212011	22	0.000	0.000	0.001	0.000	0.000	0.000	0.000	0.000	0.005	0.000	0.008	299.323	0.829	0.5960464E-04	1.922605	0.3803453E-02	-0.2962880
07212011	23	0.000	0.001	0.001	0.000	0.000	0.000	0.000	0.000	0.004	0.000	0.009	298.719	0.880	0.1466274E-03	3.083068	0.5965263E-02	-0.2866464
07212011	24	0.000	0.001	0.001	0.000	0.000	0.000	0.000	0.000	0.003	0.000	0.009	298.320	0.911	0.2492070E-03	4.037940	0.6977247E-02	-0.2375242
07222011	01	0.000	0.002	0.001	0.000	0.000	0.000	0.001	0.000	0.008	0.000	0.013	297.944	0.938	0.1428485E-02	7.655683	0.6620054E-02	0.6312241E-01
07222011	02	0.002	0.006	0.001	0.000	0.001	0.000	0.002	0.000	0.021	0.000	0.015	297.655	0.957	0.4743141E-01	12.32696	0.3169812E-02	0.5898225
07222011	03	0.011	0.009	0.001	0.000	0.002	0.000	0.003	0.001	0.026	0.000	0.016	297.596	0.948	NaN	10.06236	0.1757575E-03	1.757786
07222011	04	0.014	0.009	0.001	0.001	0.002	0.000	0.004	0.001	0.025	0.000	0.017	297.288	0.967	0.2270430	18.40417	0.8939712E-04	2.313593
07222011	05	0.015	0.011	0.001	0.001	0.003	0.000	0.005	0.001	0.023	0.000	0.017	297.052	0.982	0.3044054	28.59232	0.1334520E-03	2.330924
07222011	06	0.017	0.015	0.002	0.001	0.003	0.000	0.005	0.002	0.020	0.000	0.016	296.875	0.982	0.3175239	25.71642	0.1037337E-03	2.394290
07222011	07	0.018	0.019	0.003	0.001	0.003	0.000	0.005	0.002	0.017	0.000	0.015	297.508	0.962	0.1044725	10.91506	0.8288906E-04	2.119529
07222011	08	0.016	0.031	0.011	0.001	0.003	0.001	0.005	0.002	0.014	0.001	0.014	298.745	0.940	0.4893184E-01	6.553191	0.7178092E-04	1.960444
07222011	09	0.011	0.068	0.042	0.001	0.003	0.000	0.004	0.002	0.014	0.001	0.013	300.377	0.870	0.8828342E-02	2.798862	0.1024916E-03	1.436293
07222011	10	0.002	0.083	0.055	0.000	0.002	0.000	0.002	0.002	0.018	0.001	0.017	301.955	0.779	0.6898642E-03	2.206019	0.3157957E-02	-0.1557969
07222011	11	0.000	0.057	0.040	0.000	0.001	0.000	0.001	0.001	0.015	0.000	0.020	303.329	0.714	0.2557039E-04	2.419785	0.3620185E-02	-0.1749541
07222011	12	0.000	0.030	0.029	0.000	0.001	0.000	0.001	0.001	0.014	0.000	0.020	304.510	0.659	0.8523464E-05	2.100795	0.3991139E-02	-0.2787131
07222011	13	0.000	0.016	0.021	0.000	0.001	0.000	0.001	0.000	0.014	0.000	0.018	305.518	0.611	0.3695488E-05	1.615442	0.2738862E-02	-0.2292788
07222011	14	0.001	0.009	0.015	0.000	0.000	0.000	0.001	0.000	0.014	0.000	0.014	305.778	0.600	0.1919270E-04	1.037761	0.1093398E-02	-0.2268085E-01
07222011	15	0.002	0.005	0.010	0.000	0.000	0.000	0.001	0.000	0.015	0.000	0.012	304.792	0.623	0.6365776E-04	0.8928816	0.2271731E-02	-0.4055630
07222011	16	0.003	0.003	0.007	0.000	0.000	0.000	0.001	0.000	0.017	0.000	0.010	303.945	0.677	NaN	1.088423	0.4686223E-02	-0.6340254
07222011	17	0.006	0.003	0.006	0.000	0.000	0.000	0.001	0.000	0.016	0.000	0.009	303.023	0.715	NaN	1.298816	0.1491449E-02	-0.6006075E-01
07222011	18	0.007	0.003	0.005	0.000	0.001	0.000	0.001	0.000	0.014	0.000	0.008	302.315	0.765	NaN	1.493314	0.6357203E-03	0.3708850
07222011	19	0.006	0.003	0.005	0.000	0.001	0.000	0.001	0.000	0.012	0.000	0.007	301.120	0.826	NaN	1.805243	0.6623368E-03	0.4354568
07222011	20	0.007	0.003	0.004	0.000	0.001	0.000	0.001	0.000	0.010	0.000	0.006	299.927	0.881	NaN	2.232353	0.3259192E-03	0.8356529
07222011	21	0.011	0.004	0.002	0.000	0.001	0.000	0.002	0.001	0.008	0.000	0.006	299.264	0.900	NaN	2.043188	0.7311719E-04	1.446289
07222011	22	0.012	0.005	0.002	0.000	0.001	0.000	0.003	0.001	0.007	0.000	0.007	298.833	0.908	NaN	2.621027	0.8002862E-04	1.515226
07222011	23	0.013	0.005	0.002	0.000	0.001	0.000	0.003	0.001	0.007	0.000	0.007	298.498	0.918	NaN	2.968949	0.7232092E-04	1.613339
07222011	24	0.013	0.005	0.002	0.000	0.002	0.000	0.004	0.001	0.008	0.000	0.008	298.167	0.937	NaN	4.568358	0.6621038E-04	1.838834
07232011	01	0.012	0.005	0.001	0.000	0.002	0.000	0.004	0.001	0.010	0.000	0.009	297.777	0.961	NaN	7.184476	0.7470139E-04	1.983066
07232011	02	0.004	0.003	0.001	0.000	0.002	0.000	0.003	0.001	0.014	0.000	0.010	297.546	0.965	NaN	10.43521	0.2286726E-03	1.659287
07232011	03	0.002	0.002	0.002	0.000	0.001	0.000	0.002	0.001	0.016	0.000	0.012	297.573	0.951	0.5605650E-01	7.215252	0.2495088E-02	0.4611656
07232011	04	0.002	0.004	0.003	0.000	0.001	0.000	0.001	0.001	0.015	0.000	0.013	297.410	0.963	0.2185023E-01	9.741687	0.2922539E-02	0.5228738
07232011	05	0.001	0.006	0.005	0.000	0.001	0.000	0.001	0.001	0.011	0.000	0.014	297.205	0.974	0.1156414E-01	14.48944	0.4607580E-02	0.4975788
07232011	06	0.000	0.007	0.006	0.000	0.001	0.000	0.001	0.001	0.008	0.000	0.015	297.139	0.975	0.1366174E-01	24.34082	0.7948823E-02	0.4860324
07232011	07	0.000	0.009	0.008	0.000	0.001	0.000	0.000	0.000	0.006	0.000	0.017	297.868	0.952	0.000000	12.51583	0.1252129E-01	-0.1895475E-03
07232011	08	0.000	0.020	0.020	0.000	0.000	0.000	0.000	0.000	0.004	0.000	0.020	298.941	0.920	0.6200075E-03	10.20904	0.1805995E-01	-0.2477317
07232011	09	0.000	0.027	0.035	0.000	0.000	0.000	0.000	0.000	0.003	0.000	0.021	299.898	0.878	0.2137423E-03	7.878708	0.1975535E-01	-0.3992297
07232011	10	0.000	0.018	0.031	0.000	0.000	0.000	0.000	0.000	0.003	0.000	0.021	299.936	0.855	0.1485944E-03	7.005274	0.1968243E-01	-0.4486537
07232011	11	0.000	0.011	0.028	0.000	0.000	0.000	0.000	0.000	0.004	0.000	0.023	301.557	0.809	0.6562471E-04	6.022406	0.2058701E-01	-0.5338231
07232011	12	0.000	0.005	0.026	0.000	0.000	0.000	0.000	0.000	0.003	0.000	0.021	301.822	0.777	0.3761053E-04	4.972441	0.1936319E-01	-0.5904073
07232011	13	0.000	0.003	0.022	0.000	0.000	0.000	0.000	0.000	0.003	0.000	0.020	302.917	0.752	0.2193451E-04	4.285661	0.1818317E-01	-0.6276518
07232011	14	0.000	0.001	0.020	0.000	0.000	0.000	0.000	0.000	0.002	0.000	0.017	302.307	0.749	0.1937151E-04	3.692339	0.1603930E-01	-0.6378839
07232011	15	0.000	0.001	0.015	0.000	0.000	0.000	0.000	0.000	0.003	0.000	0.016	302.819	0.753	0.1794100E-04	3.374499	0.1394794E-01	-0.6163006
07232011	16	0.000	0.001	0.014	0.000	0.000	0.000	0.000	0.000	0.002	0.000	0.013	301.788	0.779	0.2354383E-04	3.064961	0.1184538E-01	-0.5871243
07232011	17	0.000	0.000	0.010	0.000	0.000	0.000	0.000	0.000	0.003	0.000	0.010	301.393	0.796	0.2717972E-04	2.397509	0.7699730E-02	-0.5067152
07232011	18	0.000	0.000	0.007	0.000	0.000	0.000	0.000	0.000	0.003	0.000	0.008	300.595	0.828	0.3957748E-04	2.120330	0.5639908E-02	-0.4248685
07232011	19	0.000	0.000	0.005	0.000	0.000	0.000	0.000	0.000	0.003	0.000	0.007	300.097	0.854	0.5364418E-04	2.011002	0.4623155E-02	-0.3615259
07232011	20	0.000	0.000	0.003	0.000	0.000	0.000	0.000	0.000	0.003	0.000	0.006	299.308	0.877	0.9429455E-04	2.019333	0.3642403E-02	-0.2561801
07232011	21	0.000	0.000	0.002	0.000	0.000	0.000	0.000	0.000	0.003	0.000	0.005	298.852	0.892	0.1242757E-03	1.754251	0.2644287E-02	-0.1782169
07232011	22	0.000	0.000	0.002	0.000	0.000	0.000	0.000	0.000	0.003	0.000	0.005	298.493	0.905	0.1970530E-03	2.086721	0.2697594E-02	-0.1115122
07232011	23	0.000	0.000	0.002	0.000	0.000	0.000	0.000	0.000	0.004	0.000	0.005	298.258	0.910	0.2785325E-03	1.969286	0.1918964E-02	0.1124209E-01
07232011	24	0.000	0.001	0.002	0.000	0.000	0.000	0.000	0.000	0.004	0.000	0.006	298.011	0.915	0.3383756E-03	2.722411	0.2948153E-02	-0.3459621E-01
07242011	01	0.001	0.001	0.002	0.000	0.000	0.000	0.000	0.000	0.005	0.000	0.006	297.770	0.923	0.6635785E-03	2.479339	0.1630906E-02	0.1819068
07242011	02	0.001	0.001	0.002	0.000	0.000	0.000	0.000	0.000	0.006	0.000	0.007	297.531	0.932	0.1047790E-02	3.301887	0.1972814E-02	0.2236761
07242011	03	0.001	0.001	0.002	0.000	0.001	0.000	0.000	0.000	0.007	0.000	0.008	297.355	0.938	0.000000	4.351452	0.2614598E-02	0.2212293
07242011	04	0.001	0.001	0.003	0.000	0.001	0.000	0.000	0.000	0.008	0.000	0.009	297.212	0.945	0.000000	5.896069	0.3009978E-02	0.2919992
07242011	05	0.001	0.002	0.003	0.000	0.001	0.000	0.000	0.000	0.010	0.000	0.010	297.073	0.952	0.000000	6.503997	0.3052325E-02	0.3285496
07242011	06	0.001	0.003	0.003	0.000	0.001	0.000	0.001	0.000	0.011	0.000	0.011	296.980	0.960	0.9260476E-02	8.980674	0.3176790E-02	0.4513204
07242011	07	0.001	0.006	0.005	0.000	0.001	0.000	0.001	0.000	0.013	0.000	0.011	297.553	0.955	0.1366609E-01	8.927792	0.2910683E-02	0.4867491
07242011	08	0.001	0.020	0.014	0.000	0.001	0.000	0.000	0.000	0.010	0.000	0.013	298.937	0.896	0.000000	4.494344	0.4396730E-02	0.9536531E-02
07242011	09	0.000	0.030	0.022	0.000	0.001	0.000	0.000	0.000	0.006	0.000	0.016	299.965	0.852	0.000000	4.608232	0.1058448E-01	-0.3611352
07242011	10	0.000	0.018	0.021	0.000	0.000	0.000	0.000	0.000	0.005	0.000	0.019	301.008	0.822	0.7039309E-04	5.019509	0.1539852E-01	-0.4868178
07242011	11	0.000	0.007	0.016	0.000	0.000	0.000	0.000	0.000	0.006	0.000	0.019	301.837	0.784	0.3749132E-04	4.194881	0.1425029E-01	-0.5311039
07242011	12	0.000	0.002	0.011	0.000	0.000	0.000	0.000	0.000	0.006	0.000	0.016	302.700	0.757	0.2276897E-04	3.210727	0.1096984E-01	-0.5335970
07242011	13	0.000	0.001	0.008	0.000	0.000	0.000	0.000	0.000	0.005	0.000	0.014	303.307	0.734	0.1215935E-04	2.567595	0.9763870E-02	-0.5800955
07242011	14	0.000	0.000	0.006	0.000	0.000	0.000	0.000	0.000	0.004	0.000	0.012	303.364	0.734	0.1043081E-04	2.226119	0.8655056E-02	-0.5897216
07242011	15	0.000	0.001	0.005	0.000	0.000	0.000	0.000	0.000	0.004	0.000	0.012	303.088	0.739	0.1209974E-04	2.297616	0.8679803E-02	-0.5772324
07242011	16	0.000	0.001	0.005	0.000	0.000	0.000	0.000	0.000	0.004	0.000	0.012	303.014	0.732	0.1066923E-04	2.226119	0.8666480E-02	-0.5902944
07242011	17	0.000	0.001	0.004	0.000	0.000	0.000	0.000	0.000	0.004	0.000	0.012	302.569	0.729	0.1102686E-04	2.226119	0.8681381E-02	-0.5910404
07242011	18	0.000	0.000	0.003	0.000	0.000	0.000	0.000	0.000	0.005	0.000	0.012	301.936	0.756	0.1865625E-04	2.362617	0.7757266E-02	-0.5163153
07242011	19	0.000	0.000	0.002	0.000	0.000	0.000	0.000	0.000	0.006	0.000	0.011	301.431	0.768	0.2318621E-04	2.112909	0.5756849E-02	-0.4353040
07242011	20	0.000	0.000	0.001	0.000	0.000	0.000	0.000	0.000	0.007	0.000	0.010	300.305	0.775	0.3325939E-04	1.852362	0.3837135E-02	-0.3162811
07242011	21	0.000	0.000	0.001	0.000	0.000	0.000	0.000	0.000	0.007	0.000	0.009	299.259	0.831	0.8738041E-04	2.026994	0.3099873E-02	-0.1844915
07242011	22	0.000	0.000	0.001	0.000	0.000	0.000	0.000	0.000	0.006	0.000	0.009	298.663	0.866	0.1653433E-03	2.677692	0.4162680E-02	-0.1916125
07242011	23	0.001	0.000	0.001	0.000	0.000	0.000	0.000	0.000	0.007	0.000	0.009	298.353	0.883	0.3078580E-03	2.650512	0.2722917E-02	-0.1170465E-01
07242011	24	0.001	0.000	0.001	0.000	0.000	0.000	0.000	0.000	0.008	0.000	0.009	298.150	0.885	0.4783869E-03	2.752293	0.2225866E-02	0.9219570E-01
07252011	01	0.001	0.001	0.001	0.000	0.000	0.000	0.000	0.000	0.010	0.000	0.009	297.754	0.920	0.1738846E-02	3.628616	0.1659305E-02	0.3398148
07252011	02	0.002	0.001	0.001	0.000	0.000	0.000	0.000	0.000	0.013	0.000	0.010	297.469	0.941	0.7098854E-02	5.263158	0.1175559E-02	0.6510020
07252011	03	0.003	0.001	0.001	0.000	0.001	0.000	0.000	0.000	0.016	0.000	0.011	297.251	0.956	0.000000	9.108159	0.2595043E-02	0.5452861
07252011	04	0.002	0.001	0.001	0.000	0.001	0.000	0.001	0.001	0.021	0.000	0.012	297.097	0.962	NaN	9.240195	0.2515628E-03	1.565035
07252011	05	0.005	0.001	0.001	0.001	0.002	0.000	0.001	0.001	0.023	0.000	0.013	297.006	0.961	0.1450531	10.08053	0.5539752E-04	2.259993
07252011	06	0.007	0.002	0.001	0.001	0.002	0.000	0.001	0.001	0.025	0.000	0.015	296.947	0.958	0.1679025	11.76120	0.6498880E-04	2.257613
07252011	07	0.009	0.003	0.002	0.001	0.003	0.000	0.001	0.001	0.028	0.000	0.017	297.642	0.932	0.9790725E-01	7.471507	0.6310973E-04	2.073312
07252011	08	0.007	0.008	0.006	0.001	0.003	0.000	0.001	0.002	0.031	0.001	0.020	298.993	0.894	0.4611319E-01	5.403224	0.1042161E-03	1.714718
07252011	09	0.001	0.020	0.018	0.000	0.001	0.000	0.001	0.001	0.022	0.000	0.020	299.780	0.871	0.1440942E-02	4.776324	0.3908521E-02	0.8708125E-01
07252011	10	0.000	0.009	0.015	0.000	0.000	0.000	0.000	0.001	0.015	0.000	0.022	300.192	0.858	0.2888441E-03	5.758074	0.8910361E-02	-0.1896181
07252011	11	0.000	0.004	0.014	0.000	0.000	0.000	0.000	0.000	0.012	0.000	0.021	301.449	0.824	0.1018643E-03	4.916388	0.1076583E-01	-0.3404012
07252011	12	0.000	0.002	0.014	0.000	0.000	0.000	0.000	0.000	0.010	0.000	0.020	302.050	0.775	0.4452467E-04	4.074803	0.1136103E-01	-0.4453109
07252011	13	0.000	0.002	0.013	0.000	0.000	0.000	0.000	0.000	0.010	0.000	0.019	302.705	0.744	0.2235174E-04	3.310411	0.1009669E-01	-0.4842972
07252011	14	0.000	0.002	0.013	0.000	0.000	0.000	0.000	0.000	0.010	0.000	0.019	303.547	0.726	0.1788139E-04	3.199706	0.1001405E-01	-0.4954997
07252011	15	0.000	0.002	0.012	0.000	0.000	0.000	0.000	0.000	0.009	0.000	0.018	303.156	0.717	0.1484156E-04	2.975078	0.9944399E-02	-0.5240802
07252011	16	0.000	0.004	0.010	0.000	0.000	0.000	0.000	0.000	0.010	0.000	0.018	303.568	0.721	0.1484156E-04	2.887232	0.8923900E-02	-0.4900730
07252011	17	0.000	0.005	0.010	0.000	0.000	0.000	0.000	0.000	0.009	0.000	0.018	303.189	0.727	0.1710653E-04	3.073284	0.9976856E-02	-0.5113910
07252011	18	0.000	0.006	0.008	0.000	0.000	0.000	0.000	0.000	0.009	0.000	0.019	302.858	0.730	0.1823902E-04	3.288338	0.1104841E-01	-0.5263233
07252011	19	0.000	0.007	0.007	0.000	0.000	0.000	0.000	0.000	0.009	0.000	0.020	302.153	0.743	0.2336502E-04	3.620964	0.1218021E-01	-0.5268305
07252011	20	0.000	0.005	0.004	0.000	0.000	0.000	0.000	0.000	0.011	0.000	0.021	300.912	0.783	0.5275011E-04	4.232284	0.1152103E-01	-0.4349165
07252011	21	0.000	0.003	0.002	0.001	0.000	0.000	0.000	0.000	0.013	0.000	0.020	300.000	0.809	0.000000	4.322124	0.9068035E-02	-0.3218160
07252011	22	0.000	0.002	0.002	0.001	0.000	0.000	0.000	0.000	0.013	0.000	0.018	299.352	0.829	0.000000	4.152850	0.7300288E-02	-0.2449937
07252011	23	0.001	0.002	0.002	0.001	0.000	0.000	0.000	0.000	0.014	0.000	0.017	298.828	0.848	0.000000	4.094746	0.5289569E-02	-0.1111934
07252011	24	0.001	0.002	0.002	0.001	0.000	0.000	0.000	0.000	0.015	0.000	0.016	298.278	0.876	0.000000	4.519774	0.4488713E-02	0.2994981E-02
07262011	01	0.001	0.002	0.002	0.000	0.000	0.000	0.000	0.000	0.016	0.000	0.016	297.804	0.901	0.1280785E-02	5.307275	0.3657904E-02	0.1616393
07262011	02	0.001	0.002	0.002	0.000	0.000	0.000	0.001	0.000	0.019	0.000	0.016	297.546	0.905	0.3126979E-02	5.703640	0.3658299E-02	0.1928729
07262011	03	0.002	0.002	0.003	0.000	0.000	0.000	0.001	0.000	0.018	0.000	0.014	297.296	0.923	0.5731106E-02	5.479289	0.3132285E-02	0.2428630
07262011	04	0.001	0.002	0.003	0.000	0.000	0.000	0.001	0.000	0.015	0.000	0.012	297.174	0.932	0.5174696E-02	5.422328	0.2918410E-02	0.2690395
07262011	05	0.001	0.001	0.003	0.000	0.000	0.000	0.000	0.000	0.014	0.000	0.011	297.130	0.934	0.4101396E-02	4.986523	0.1666394E-02	0.4760200
07262011	06	0.001	0.001	0.002	0.000	0.000	0.000	0.000	0.000	0.011	0.000	0.009	297.125	0.937	0.4214048E-02	4.797239	0.1471150E-02	0.5133345
07262011	07	0.001	0.001	0.002	0.000	0.000	0.000	0.000	0.000	0.011	0.000	0.010	297.784	0.936	0.3207445E-02	5.383952	0.2039471E-02	0.4215836
07262011	08	0.001	0.001	0.002	0.000	0.001	0.000	0.000	0.001	0.012	0.000	0.014	299.267	0.890	0.7815957E-03	3.960762	0.3538562E-02	0.4895187E-01
07262011	09	0.001	0.002	0.006	0.000	0.001	0.000	0.000	0.001	0.013	0.000	0.015	300.413	0.865	0.5196333E-03	3.653859	0.3557598E-02	0.1159480E-01
07262011	10	0.001	0.005	0.008	0.000	0.000	0.000	0.000	0.001	0.010	0.000	0.011	301.407	0.838	0.2283454E-03	2.119395	0.2442539E-02	-0.6162963E-01
07262011	11	0.001	0.005	0.010	0.000	0.000	0.000	0.000	0.001	0.008	0.000	0.009	302.171	0.795	0.1058578E-03	1.359127	0.1803197E-02	-0.1227832
07262011	12	0.000	0.003	0.011	0.000	0.000	0.000	0.000	0.000	0.006	0.000	0.010	303.584	0.752	0.1364946E-04	1.737608	0.4586845E-02	-0.4215623
07262011	13	0.000	0.002	0.013	0.000	0.000	0.000	0.000	0.000	0.006	0.000	0.012	304.593	0.700	0.6556511E-05	1.862369	0.6545606E-02	-0.5458842
07262011	14	0.000	0.002	0.015	0.000	0.000	0.000	0.000	0.000	0.006	0.000	0.015	304.495	0.678	0.6020069E-05	2.319231	0.9665145E-02	-0.6198643
07262011	15	0.000	0.002	0.016	0.000	0.000	0.000	0.000	0.000	0.006	0.000	0.017	304.668	0.670	0.5900860E-05	2.623393	0.1174453E-01	-0.6509725
07262011	16	0.000	0.002	0.016	0.000	0.000	0.000	0.000	0.000	0.007	0.000	0.019	304.898	0.670	0.6496906E-05	2.907156	0.1281548E-01	-0.6442664
07262011	17	0.000	0.003	0.016	0.000	0.000	0.000	0.000	0.000	0.008	0.000	0.020	304.839	0.664	0.6020069E-05	2.929916	0.1282315E-01	-0.6411396
07262011	18	0.000	0.002	0.013	0.000	0.000	0.000	0.000	0.000	0.008	0.000	0.020	304.416	0.662	0.6198883E-05	2.929916	0.1284121E-01	-0.6417508
07262011	19	0.000	0.001	0.010	0.000	0.000	0.000	0.000	0.000	0.008	0.000	0.018	303.742	0.651	0.5125999E-05	2.499935	0.1073794E-01	-0.6329922
07262011	20	0.000	0.001	0.006	0.000	0.000	0.000	0.000	0.000	0.010	0.000	0.017	300.912	0.783	0.4589558E-04	3.324803	0.8270582E-02	-0.3957701
07262011	21	0.000	0.001	0.003	0.000	0.000	0.000	0.000	0.000	0.012	0.000	0.015	300.000	0.809	0.1015663E-03	3.025436	0.4681947E-02	-0.1896386
07262011	22	0.001	0.001	0.002	0.001	0.000	0.000	0.000	0.000	0.012	0.000	0.014	299.352	0.829	0.000000	2.944391	0.3801956E-02	-0.1110116
07262011	23	0.001	0.001	0.002	0.001	0.000	0.000	0.000	0.000	0.012	0.000	0.014	298.828	0.848	0.000000	3.305954	0.4073328E-02	-0.9065260E-01
07262011	24	0.001	0.001	0.002	0.001	0.000	0.000	0.000	0.000	0.012	0.000	0.014	298.278	0.876	0.000000	4.062942	0.4425951E-02	-0.3716606E-01
07272011	01	0.001	0.002	0.002	0.000	0.000	0.000	0.001	0.000	0.012	0.000	0.015	297.804	0.901	0.8980632E-03	5.163240	0.4829876E-02	0.2898633E-01
07272011	02	0.001	0.003	0.002	0.000	0.000	0.000	0.001	0.000	0.014	0.000	0.016	297.546	0.905	0.1428246E-02	5.957162	0.4808733E-02	0.9300880E-01
07272011	03	0.001	0.003	0.002	0.000	0.000	0.000	0.001	0.000	0.013	0.000	0.015	297.296	0.923	0.1743317E-02	6.231553	0.4679746E-02	0.1243740
07272011	04	0.000	0.002	0.003	0.000	0.000	0.000	0.001	0.000	0.012	0.000	0.015	297.174	0.932	0.1775384E-02	7.355905	0.5812181E-02	0.1022969
07272011	05	0.000	0.002	0.003	0.000	0.000	0.000	0.001	0.000	0.011	0.000	0.015	297.130	0.934	0.1568258E-02	7.479445	0.6403553E-02	0.6744831E-01
07272011	06	0.000	0.001	0.003	0.000	0.000	0.000	0.000	0.000	0.010	0.000	0.014	297.125	0.937	0.1710415E-02	8.167184	0.6661561E-02	0.8849629E-01
07272011	07	0.000	0.001	0.002	0.000	0.000	0.000	0.000	0.000	0.010	0.000	0.014	297.784	0.936	0.1614392E-02	8.167184	0.6619093E-02	0.9127389E-01
07272011	08	0.000	0.001	0.002	0.000	0.001	0.000	0.000	0.000	0.011	0.000	0.016	299.267	0.890	0.000000	5.373126	0.6798321E-02	-0.1021747
07272011	09	0.001	0.002	0.005	0.000	0.001	0.000	0.000	0.001	0.010	0.000	0.014	300.413	0.865	0.3284216E-03	3.538440	0.4020208E-02	-0.5543667E-01
07272011	10	0.000	0.006	0.007	0.000	0.000	0.000	0.000	0.001	0.008	0.000	0.012	301.407	0.838	0.9667873E-04	2.670510	0.4554404E-02	-0.2318373
07272011	11	0.000	0.005	0.009	0.000	0.000	0.000	0.000	0.000	0.008	0.000	0.012	302.171	0.795	0.4488230E-04	2.461275	0.4979172E-02	-0.3059970
07272011	12	0.000	0.003	0.011	0.000	0.000	0.000	0.000	0.000	0.008	0.000	0.013	303.584	0.752	0.1806021E-04	2.240880	0.5767772E-02	-0.4105894
07272011	13	0.000	0.002	0.013	0.000	0.000	0.000	0.000	0.000	0.009	0.000	0.016	304.593	0.700	0.9000301E-05	2.396728	0.7718952E-02	-0.5079396
07272011	14	0.000	0.002	0.015	0.000	0.000	0.000	0.000	0.000	0.010	0.000	0.019	304.495	0.678	0.7867813E-05	2.733310	0.9797642E-02	-0.5544327
07272011	15	0.000	0.002	0.017	0.000	0.000	0.000	0.000	0.000	0.013	0.000	0.021	304.668	0.670	0.7808208E-05	2.768117	0.8810043E-02	-0.5027936
07272011	16	0.000	0.002	0.017	0.000	0.000	0.000	0.000	0.001	0.014	0.000	0.023	304.898	0.670	0.8106232E-05	2.867719	0.9014598E-02	-0.4974098
07272011	17	0.000	0.003	0.017	0.000	0.000	0.000	0.000	0.001	0.016	0.000	0.024	304.839	0.664	0.7808208E-05	2.796770	0.8020898E-02	-0.4575663
07272011	18	0.000	0.002	0.014	0.000	0.000	0.000	0.000	0.001	0.017	0.000	0.026	304.416	0.662	0.8583069E-05	3.072919	0.9095887E-02	-0.4712939
07272011	19	0.000	0.002	0.011	0.000	0.000	0.000	0.000	0.001	0.017	0.000	0.024	303.742	0.651	0.7569790E-05	2.627502	0.7001183E-02	-0.4256283
07272011	20	0.000	0.001	0.006	0.000	0.000	0.000	0.000	0.001	0.015	0.000	0.020	300.729	0.877	0.4272461E-03	5.799788	0.7278983E-02	-0.9865858E-01
07272011	21	0.000	0.001	0.004	0.000	0.000	0.000	0.000	0.001	0.013	0.000	0.021	299.859	0.907	0.7324219E-03	8.229449	0.1013685E-01	-0.9053233E-01
07272011	22	0.000	0.001	0.003	0.000	0.000	0.000	0.000	0.001	0.013	0.000	0.022	299.776	0.871	0.3093481E-03	6.355171	0.1066168E-01	-0.2246985
07272011	23	0.000	0.002	0.003	0.000	0.001	0.000	0.001	0.000	0.016	0.000	0.024	299.310	0.900	0.8701682E-03	8.783800	0.1010585E-01	-0.6089038E-01
07272011	24	0.001	0.003	0.003	0.000	0.001	0.000	0.001	0.000	0.022	0.000	0.024	298.747	0.945	0.7258177E-02	15.78732	0.7542506E-02	0.3207929
07282011	01	0.001	0.004	0.002	0.000	0.001	0.000	0.001	0.000	0.026	0.000	0.024	298.377	0.965	0.2642012E-01	26.71166	0.6846842E-02	0.5912107
07282011	02	0.001	0.004	0.002	0.000	0.001	0.000	0.001	0.000	0.023	0.000	0.022	298.135	0.967	0.2286118E-01	24.48944	0.6533141E-02	0.5738569
07282011	03	0.001	0.003	0.003	0.000	0.001	0.000	0.001	0.000	0.016	0.000	0.019	297.932	0.968	0.1471192E-01	21.76245	0.6980141E-02	0.4938436
07282011	04	0.000	0.003	0.003	0.000	0.001	0.000	0.000	0.000	0.011	0.000	0.017	297.770	0.972	0.000000	19.62165	0.9200946E-02	0.3289030
07282011	05	0.000	0.002	0.003	0.000	0.001	0.000	0.000	0.000	0.009	0.000	0.015	297.693	0.968	0.000000	17.39943	0.8552738E-02	0.3084297
07282011	06	0.000	0.002	0.003	0.000	0.001	0.000	0.000	0.000	0.010	0.000	0.015	297.619	0.967	0.000000	17.26054	0.7892061E-02	0.3398639
07282011	07	0.001	0.002	0.004	0.000	0.001	0.000	0.001	0.000	0.014	0.000	0.016	298.323	0.931	0.2646744E-02	7.535439	0.4747616E-02	0.2006330
07282011	08	0.001	0.004	0.006	0.000	0.001	0.000	0.000	0.000	0.013	0.000	0.015	299.412	0.889	0.000000	4.616916	0.4334697E-02	0.2739324E-01
07282011	09	0.000	0.002	0.009	0.000	0.000	0.000	0.000	0.000	0.007	0.000	0.013	299.792	0.851	0.1168847E-03	3.588586	0.7272264E-02	-0.3067463
07282011	10	0.000	0.001	0.008	0.000	0.000	0.000	0.000	0.000	0.007	0.000	0.013	301.137	0.809	0.5263090E-04	2.948682	0.7043618E-02	-0.3781679
07282011	11	0.000	0.001	0.008	0.000	0.000	0.000	0.000	0.000	0.007	0.000	0.011	300.833	0.808	0.5203485E-04	2.391578	0.4965599E-02	-0.3172870
07282011	12	0.000	0.000	0.007	0.000	0.000	0.000	0.000	0.000	0.007	0.000	0.010	302.844	0.752	0.1657009E-04	1.647559	0.3643344E-02	-0.3446593
07282011	13	0.000	0.000	0.008	0.000	0.000	0.000	0.000	0.000	0.006	0.000	0.009	301.648	0.771	0.2151728E-04	1.628648	0.3656412E-02	-0.3512279
07282011	14	0.001	0.000	0.007	0.000	0.000	0.000	0.000	0.000	0.008	0.000	0.009	303.282	0.746	0.3254414E-04	1.239669	0.1116379E-02	0.4549429E-01
07282011	15	0.001	0.000	0.008	0.000	0.000	0.000	0.000	0.000	0.007	0.000	0.008	301.172	0.802	0.7015467E-04	1.388889	0.1329666E-02	0.1892487E-01
07282011	16	0.001	0.000	0.006	0.000	0.000	0.000	0.000	0.000	0.008	0.000	0.008	301.453	0.815	0.1456738E-03	1.505959	0.1107111E-02	0.1336222
07282011	17	0.001	0.000	0.006	0.000	0.000	0.000	0.000	0.000	0.008	0.000	0.009	300.444	0.820	0.1133680E-03	1.730769	0.1654610E-02	0.1954356E-01
07282011	18	0.000	0.000	0.007	0.000	0.000	0.000	0.000	0.000	0.007	0.000	0.009	300.105	0.837	0.9727478E-04	2.139535	0.3111046E-02	-0.1625869
07282011	19	0.000	0.000	0.008	0.000	0.000	0.000	0.000	0.000	0.005	0.000	0.009	299.091	0.861	0.1059771E-03	2.616222	0.4954138E-02	-0.2772935
07282011	20	0.000	0.000	0.009	0.000	0.000	0.000	0.000	0.000	0.004	0.000	0.010	298.363	0.889	0.1899600E-03	3.733702	0.7071158E-02	-0.2773509
07282011	21	0.000	0.000	0.008	0.000	0.000	0.000	0.000	0.000	0.004	0.000	0.010	297.871	0.914	0.3067851E-03	4.408311	0.7155513E-02	-0.2103685
07282011	22	0.000	0.000	0.007	0.000	0.000	0.000	0.000	0.000	0.003	0.000	0.010	297.624	0.929	0.4792809E-03	5.581761	0.8159778E-02	-0.1649071
07282011	23	0.000	0.000	0.007	0.000	0.000	0.000	0.000	0.000	0.002	0.000	0.010	297.456	0.941	0.6012321E-03	6.498302	0.9129355E-02	-0.1476402
07282011	24	0.000	0.001	0.008	0.000	0.000	0.000	0.000	0.000	0.001	0.000	0.010	297.296	0.953	0.7988811E-03	7.744509	0.1011227E-01	-0.1158548
07292011	01	0.000	0.000	0.007	0.000	0.000	0.000	0.000	0.000	0.001	0.000	0.010	297.124	0.969	0.2226532E-02	12.36111	0.1029260E-01	0.7953235E-01
07292011	02	0.000	0.001	0.007	0.000	0.000	0.000	0.000	0.000	0.002	0.000	0.009	297.129	0.968	0.2262294E-02	10.97222	0.8277344E-02	0.1224036
07292011	03	0.000	0.001	0.007	0.000	0.000	0.000	0.000	0.000	0.002	0.000	0.008	297.234	0.967	0.2051175E-02	9.722222	0.7158299E-02	0.1329557
07292011	04	0.000	0.002	0.007	0.000	0.000	0.000	0.000	0.000	0.003	0.000	0.010	297.163	0.972	0.2723813E-02	12.08333	0.8513528E-02	0.1520772
07292011	05	0.000	0.003	0.007	0.000	0.001	0.000	0.001	0.000	0.005	0.000	0.013	297.079	0.978	0.1001257E-01	22.89244	0.8975940E-02	0.4066122
07292011	06	0.000	0.003	0.005	0.000	0.001	0.000	0.001	0.000	0.007	0.000	0.015	297.064	0.979	0.1255548E-01	26.28227	0.9652400E-02	0.4350275
07292011	07	0.000	0.003	0.006	0.000	0.001	0.000	0.001	0.000	0.010	0.000	0.017	297.687	0.972	0.7521152E-02	19.65996	0.9194680E-02	0.3300461
07292011	08	0.000	0.006	0.009	0.000	0.001	0.000	0.001	0.001	0.012	0.000	0.019	299.295	0.903	0.6900430E-03	6.545106	0.7305763E-02	-0.4774887E-01
07292011	09	0.000	0.014	0.013	0.000	0.001	0.000	0.001	0.000	0.007	0.000	0.018	301.010	0.819	0.8410215E-04	4.386815	0.1056559E-01	-0.3817444
07292011	10	0.000	0.016	0.011	0.000	0.001	0.000	0.000	0.000	0.004	0.000	0.011	302.380	0.758	0.000000	2.146857	0.6813200E-02	-0.5015481
07292011	11	0.000	0.010	0.008	0.000	0.000	0.000	0.000	0.000	0.003	0.000	0.008	303.561	0.710	0.5185604E-05	1.367980	0.5407941E-02	-0.5969520
07292011	12	0.000	0.004	0.007	0.000	0.000	0.000	0.000	0.000	0.002	0.000	0.006	304.075	0.680	0.2443790E-05	0.9617563	0.4280540E-02	-0.6484335
07292011	13	0.000	0.001	0.005	0.000	0.000	0.000	0.000	0.000	0.002	0.000	0.006	305.028	0.641	0.1311302E-05	0.8664041	0.4242460E-02	-0.6898972
07292011	14	0.000	0.000	0.004	0.000	0.000	0.000	0.000	0.000	0.002	0.000	0.005	305.523	0.620	0.8344650E-06	0.6595231	0.3176264E-02	-0.6826865
07292011	15	0.000	0.000	0.002	0.000	0.000	0.000	0.000	0.000	0.004	0.000	0.005	305.498	0.619	0.1072884E-05	0.4953231	0.1134376E-02	-0.3598683
07292011	16	0.000	0.000	0.002	0.000	0.000	0.000	0.000	0.000	0.004	0.000	0.004	305.262	0.630	0.2384186E-05	0.3430532	0.2396327E-03	0.1558154
07292011	17	0.001	0.000	0.001	0.000	0.000	0.000	0.000	0.000	0.004	0.000	0.004	305.038	0.637	0.1192093E-04	0.3394868	0.1869950E-03	0.2589929
07292011	18	0.001	0.000	0.001	0.000	0.000	0.000	0.000	0.000	0.004	0.000	0.003	304.665	0.636	0.4082918E-04	0.2579829	0.2914186E-03	-0.5292640E-01
07292011	19	0.001	0.000	0.001	0.000	0.000	0.000	0.000	0.000	0.004	0.000	0.004	303.503	0.645	0.1394749E-04	0.3526281	0.2212128E-03	0.2025068
07292011	20	0.001	0.000	0.001	0.000	0.000	0.000	0.000	0.000	0.005	0.000	0.004	302.126	0.710	0.5394220E-04	0.4246285	0.4488251E-03	-0.2406800E-01
07292011	21	0.001	0.000	0.001	0.000	0.000	0.000	0.000	0.000	0.005	0.000	0.004	301.293	0.738	0.7826090E-04	0.4807693	0.4665432E-03	0.1304485E-01
07292011	22	0.001	0.000	0.001	0.000	0.000	0.000	0.000	0.000	0.005	0.000	0.005	300.608	0.770	0.6258488E-04	0.7258531	0.5535380E-03	0.1177013
07292011	23	0.001	0.000	0.001	0.000	0.000	0.000	0.000	0.000	0.006	0.000	0.006	299.927	0.810	0.1184940E-03	1.064375	0.8158437E-03	0.1154878
07292011	24	0.001	0.001	0.001	0.000	0.000	0.000	0.000	0.000	0.006	0.000	0.007	299.273	0.853	0.1587272E-03	1.601831	0.1482773E-02	0.3354201E-01
07302011	01	0.001	0.002	0.001	0.000	0.000	0.000	0.000	0.000	0.009	0.000	0.009	298.654	0.905	0.1006901E-02	3.287037	0.1931677E-02	0.2308701
07302011	02	0.001	0.003	0.001	0.000	0.000	0.000	0.000	0.000	0.014	0.000	0.012	298.232	0.932	0.3149331E-02	5.508760	0.2150090E-02	0.4085972
07302011	03	0.002	0.005	0.002	0.000	0.001	0.000	0.000	0.000	0.018	0.000	0.014	298.009	0.937	0.000000	7.388554	0.3332784E-02	0.3457523
07302011	04	0.002	0.005	0.002	0.000	0.001	0.000	0.001	0.000	0.020	0.000	0.015	297.870	0.930	0.1042676E-01	6.751689	0.3250903E-02	0.3174084
07302011	05	0.002	0.005	0.002	0.001	0.001	0.000	0.001	0.001	0.021	0.000	0.015	297.711	0.934	0.000000	6.409566	0.2950408E-02	0.3369466
07302011	06	0.003	0.005	0.002	0.001	0.001	0.000	0.001	0.001	0.022	0.000	0.014	297.610	0.938	0.8999962E-01	7.097980	0.5561361E-04	2.105954
07302011	07	0.002	0.005	0.002	0.001	0.001	0.000	0.001	0.001	0.024	0.000	0.014	298.188	0.922	0.7182759E-01	5.299981	0.4656097E-04	2.056252
07302011	08	0.004	0.006	0.003	0.001	0.001	0.000	0.001	0.001	0.023	0.000	0.014	299.766	0.890	0.4515564E-01	3.889164	0.4275540E-04	1.958865
07302011	09	0.004	0.012	0.006	0.001	0.001	0.000	0.001	0.001	0.023	0.000	0.013	301.216	0.834	0.2106583E-01	2.393626	0.4216111E-04	1.754144
07302011	10	0.002	0.053	0.013	0.000	0.000	0.000	0.000	0.001	0.019	0.000	0.014	302.597	0.765	0.5494952E-03	1.825434	0.3234491E-02	-0.2484400
07302011	11	0.001	0.077	0.012	0.000	0.000	0.000	0.000	0.000	0.011	0.000	0.013	303.949	0.695	0.1537800E-04	1.542198	0.1863195E-02	-0.8211843E-01
07302011	12	0.000	0.059	0.009	0.000	0.000	0.000	0.000	0.000	0.007	0.000	0.010	304.821	0.656	0.3337860E-05	1.212325	0.3358079E-02	-0.4424717
07302011	13	0.000	0.039	0.008	0.000	0.000	0.000	0.000	0.000	0.007	0.000	0.009	305.487	0.623	0.1668930E-05	0.9080016	0.2240783E-02	-0.3923133
07302011	14	0.000	0.033	0.007	0.000	0.000	0.000	0.000	0.000	0.007	0.000	0.009	306.148	0.606	0.1311302E-05	0.8793859	0.2216813E-02	-0.4015495
07302011	15	0.000	0.026	0.006	0.000	0.000	0.000	0.000	0.000	0.006	0.000	0.009	306.229	0.602	0.1013279E-05	0.9340155	0.3215381E-02	-0.5368783
07302011	16	0.000	0.019	0.006	0.000	0.000	0.000	0.000	0.000	0.006	0.000	0.009	306.240	0.600	0.1013279E-05	0.9340155	0.3215265E-02	-0.5368627
07302011	17	0.000	0.014	0.005	0.000	0.000	0.000	0.000	0.000	0.007	0.000	0.010	305.907	0.603	0.1251698E-05	1.010821	0.3236297E-02	-0.5053743
07302011	18	0.000	0.009	0.004	0.000	0.000	0.000	0.000	0.000	0.009	0.000	0.010	305.358	0.606	0.2145767E-05	0.8775911	0.1287333E-02	-0.1663988
07302011	19	0.001	0.006	0.003	0.000	0.000	0.000	0.000	0.001	0.012	0.000	0.010	304.652	0.615	0.3719330E-04	0.6832452	0.1848794E-02	-0.4323119
07302011	20	0.002	0.002	0.003	0.000	0.000	0.000	0.000	0.001	0.011	0.000	0.008	302.934	0.666	0.5276799E-03	0.7102600	0.2442697E-02	-0.5364523
07302011	21	0.003	0.002	0.003	0.000	0.000	0.000	0.001	0.001	0.013	0.000	0.008	302.024	0.681	NaN	0.7978247	0.1112572E-02	-0.1444207
07302011	22	0.008	0.003	0.004	0.000	0.000	0.000	0.001	0.001	0.014	0.000	0.008	301.222	0.709	NaN	1.023700	0.3122062E-03	0.5157313
07302011	23	0.015	0.004	0.005	0.000	0.001	0.000	0.001	0.001	0.013	0.000	0.008	300.521	0.748	NaN	1.320701	0.1341271E-03	0.9932880
07302011	24	0.020	0.005	0.006	0.000	0.001	0.000	0.001	0.001	0.013	0.000	0.008	299.887	0.793	NaN	1.686909	0.9366416E-04	1.255518
