# Supplementary material for: Understanding nitrate formation in a world with less sulfate
Source: Copernicus journal article supplement (doi:10.5194/acp-18-12765-2018), 2018-09-05
Supplement: Supplementary file 2 [file acp-18-12765-2018-supplement.zip › DATA/RAW DATA FOR DIURNALS/data_extract_SOAS_jul_mod2011.csv]

Date	Hour	NH3	SO2	HNO3	CL	NA	MG	K	CA	NH4	NO3	SO4	T	RH	e_NO3	Water	H+	pH
07022011	01	0.028	0.022	0.005	0.003	0.002	0.002	0.004	0.009	0.031	0.001	0.029	297.747	0.761	0.3076971E-01	2.993020	0.7343698E-04	1.610195
07022011	02	0.025	0.018	0.003	0.003	0.002	0.002	0.004	0.009	0.026	0.001	0.027	297.274	0.802	0.3717977E-01	3.167769	0.5930644E-04	1.727652
07022011	03	0.024	0.015	0.002	0.003	0.002	0.002	0.005	0.010	0.021	0.001	0.025	296.882	0.825	0.3798473E-01	3.034397	0.4489152E-04	1.829908
07022011	04	0.023	0.013	0.002	0.003	0.002	0.002	0.005	0.010	0.016	0.001	0.023	296.720	0.827	0.3275007E-01	2.635990	0.3724210E-04	1.849910
07022011	05	0.021	0.011	0.002	0.003	0.002	0.002	0.005	0.010	0.012	0.001	0.022	296.396	0.846	0.3290004E-01	2.710574	0.3636802E-04	1.872342
07022011	06	0.021	0.010	0.002	0.003	0.003	0.002	0.005	0.011	0.010	0.001	0.021	296.254	0.855	0.3650028E-01	2.422743	0.2260910E-04	2.030024
07022011	07	0.024	0.009	0.003	0.002	0.003	0.002	0.005	0.011	0.007	0.001	0.020	297.101	0.862	0.3424460E-01	2.189007	0.1563944E-04	2.146026
07022011	08	0.023	0.007	0.004	0.002	0.003	0.002	0.006	0.011	0.004	0.001	0.019	299.677	0.771	0.1493824E-01	1.297491	0.8193162E-05	2.199653
07022011	09	0.028	0.016	0.009	0.001	0.003	0.001	0.004	0.007	0.013	0.001	0.018	301.767	0.689	0.8966267E-02	1.299428	0.2661911E-04	1.688559
07022011	10	0.024	0.026	0.011	0.000	0.003	0.001	0.002	0.005	0.020	0.001	0.018	303.982	0.595	NaN	1.597309	0.1857986E-03	0.9343466
07022011	11	0.013	0.048	0.012	0.000	0.002	0.001	0.002	0.003	0.026	0.000	0.018	305.986	0.512	NaN	1.275519	0.7360615E-03	0.2387727
07022011	12	0.004	0.067	0.014	0.000	0.001	0.000	0.001	0.002	0.029	0.000	0.020	307.737	0.448	0.7057190E-03	0.9670099	0.4912525E-02	-0.7058738
07022011	13	0.002	0.077	0.016	0.000	0.001	0.000	0.001	0.002	0.030	0.000	0.023	309.406	0.395	0.2127886E-04	0.7642686	0.3492488E-02	-0.6598889
07022011	14	0.001	0.048	0.015	0.000	0.001	0.000	0.001	0.002	0.028	0.000	0.030	307.029	0.461	0.6556511E-05	1.271356	0.7772886E-03	0.2136849
07022011	15	0.000	0.027	0.012	0.000	0.001	0.000	0.001	0.002	0.031	0.000	0.034	306.756	0.460	0.2682209E-05	1.469847	0.7051377E-03	0.3189982
07022011	16	0.001	0.030	0.013	0.000	0.001	0.000	0.001	0.002	0.037	0.000	0.034	307.891	0.410	0.9179115E-05	1.162227	0.1137607E-02	0.9298476E-02
07022011	17	0.001	0.027	0.013	0.000	0.001	0.000	0.001	0.002	0.039	0.000	0.034	306.801	0.429	0.1436472E-04	1.246003	0.1532799E-02	-0.8996615E-01
07022011	18	0.001	0.013	0.009	0.000	0.001	0.000	0.001	0.002	0.034	0.000	0.031	305.076	0.461	0.1639128E-04	1.277411	0.1359537E-02	-0.2706039E-01
07022011	19	0.001	0.008	0.007	0.001	0.001	0.000	0.001	0.002	0.033	0.000	0.029	304.367	0.491	0.000000	1.317429	0.1807293E-02	-0.1373012
07022011	20	0.001	0.009	0.007	0.001	0.001	0.000	0.001	0.002	0.038	0.000	0.030	302.677	0.509	0.000000	1.432766	0.3883915E-02	-0.4330944
07022011	21	0.003	0.010	0.008	0.001	0.001	0.001	0.002	0.003	0.043	0.000	0.031	300.979	0.545	0.000000	1.952683	0.5107420E-02	-0.4175699
07022011	22	0.005	0.012	0.008	0.001	0.001	0.001	0.002	0.003	0.047	0.000	0.031	299.701	0.595	0.1899600E-03	2.612786	0.4342456E-02	-0.2206317
07022011	23	0.010	0.013	0.008	0.001	0.001	0.001	0.002	0.004	0.048	0.001	0.030	298.791	0.647	0.2670413E-01	2.633236	0.1201319E-03	1.340832
07022011	24	0.022	0.013	0.008	0.001	0.001	0.001	0.002	0.004	0.043	0.001	0.028	298.068	0.703	0.2764606E-01	2.852857	0.1139757E-03	1.398468
07032011	01	0.031	0.013	0.008	0.001	0.001	0.001	0.003	0.005	0.038	0.001	0.026	297.432	0.765	0.2967554E-01	3.199138	0.1048648E-03	1.484403
07032011	02	0.038	0.012	0.007	0.001	0.001	0.001	0.003	0.005	0.035	0.001	0.025	297.014	0.804	0.3655648E-01	3.465008	0.9071443E-04	1.582028
07032011	03	0.042	0.012	0.007	0.001	0.001	0.001	0.003	0.005	0.032	0.001	0.024	296.778	0.821	0.4578316E-01	3.632700	0.7618993E-04	1.678332
07032011	04	0.044	0.012	0.007	0.001	0.001	0.001	0.003	0.005	0.030	0.001	0.023	296.602	0.830	0.5093145E-01	3.632090	0.6550619E-04	1.743874
07032011	05	0.046	0.012	0.006	0.001	0.001	0.001	0.003	0.006	0.028	0.002	0.022	296.462	0.837	0.5593753E-01	3.430482	0.4951849E-04	1.840588
07032011	06	0.048	0.012	0.006	0.001	0.002	0.001	0.004	0.006	0.026	0.002	0.022	296.402	0.843	0.6210333E-01	3.442107	0.4262343E-04	1.907176
07032011	07	0.049	0.012	0.006	0.001	0.002	0.001	0.004	0.007	0.022	0.002	0.021	297.318	0.849	0.5068618E-01	3.184913	0.3518168E-04	1.956781
07032011	08	0.041	0.011	0.007	0.001	0.002	0.002	0.004	0.008	0.018	0.001	0.021	299.582	0.787	0.1822764E-01	2.217373	0.3759855E-04	1.770668
07032011	09	0.067	0.042	0.015	0.000	0.003	0.002	0.004	0.009	0.016	0.001	0.021	301.200	0.731	NaN	2.720120	0.2782459E-04	1.990159
07032011	10	0.070	0.059	0.018	0.000	0.002	0.001	0.003	0.007	0.021	0.001	0.021	303.172	0.662	NaN	2.364444	0.4585045E-04	1.712386
07032011	11	0.046	0.067	0.022	0.000	0.002	0.001	0.002	0.005	0.028	0.001	0.021	305.552	0.563	NaN	1.942437	0.1103798E-03	1.245457
07032011	12	0.012	0.055	0.024	0.000	0.001	0.000	0.001	0.003	0.037	0.000	0.023	307.020	0.508	NaN	1.558601	0.9526746E-02	-0.7862098
07032011	13	0.003	0.029	0.019	0.000	0.001	0.000	0.001	0.002	0.035	0.000	0.025	307.872	0.490	0.1208186E-03	1.243958	0.5133427E-02	-0.6156017
07032011	14	0.002	0.006	0.011	0.000	0.001	0.000	0.001	0.001	0.030	0.000	0.023	306.697	0.524	0.4732609E-04	1.173997	0.3488831E-02	-0.4730128
07032011	15	0.003	0.000	0.006	0.000	0.000	0.000	0.000	0.001	0.025	0.000	0.017	306.076	0.540	0.1482368E-03	1.025129	0.4236744E-02	-0.6162537
07032011	16	0.004	0.000	0.004	0.000	0.000	0.000	0.000	0.000	0.023	0.000	0.012	306.344	0.531	0.7712841E-04	0.8415147	0.1602074E-02	-0.2796207
07032011	17	0.006	0.000	0.003	0.000	0.000	0.000	0.000	0.000	0.018	0.000	0.009	306.333	0.521	0.7671118E-04	0.6134969	0.8913570E-03	-0.1622393
07032011	18	0.007	0.000	0.002	0.000	0.000	0.000	0.000	0.000	0.013	0.000	0.007	305.851	0.516	0.6371737E-04	0.4771643	0.7066773E-03	-0.1705532
07032011	19	0.007	0.000	0.002	0.000	0.000	0.000	0.000	0.000	0.010	0.000	0.005	304.793	0.526	0.6777048E-04	0.3506311	0.4306429E-03	-0.8926680E-01
07032011	20	0.007	0.000	0.002	0.000	0.000	0.000	0.000	0.000	0.007	0.000	0.004	303.106	0.585	0.9167194E-04	0.3330558	0.3415145E-03	-0.1089217E-01
07032011	21	0.005	0.000	0.002	0.000	0.000	0.000	0.000	0.000	0.006	0.000	0.003	301.880	0.630	0.9107590E-04	0.2808989	0.2724054E-03	0.1333435E-01
07032011	22	0.005	0.000	0.001	0.000	0.000	0.000	0.000	0.000	0.005	0.000	0.003	300.949	0.670	0.1116395E-03	0.3174603	0.2957344E-03	0.3078770E-01
07032011	23	0.004	0.000	0.001	0.000	0.000	0.000	0.000	0.000	0.004	0.000	0.002	300.192	0.710	0.1043081E-03	0.2412545	0.1837703E-03	0.1182003
07032011	24	0.003	0.000	0.001	0.000	0.000	0.000	0.000	0.000	0.003	0.000	0.002	299.559	0.748	0.8279085E-04	0.2785515	0.2919521E-03	-0.2040603E-01
07042011	01	0.004	0.000	0.001	0.000	0.000	0.000	0.000	0.000	0.003	0.000	0.002	299.070	0.783	0.1545548E-03	0.3139718	0.1945322E-03	0.2078990
07042011	02	0.004	0.000	0.001	0.000	0.000	0.000	0.000	0.000	0.002	0.000	0.001	298.558	0.822	0.1571774E-03	0.1890359	0.6689710E-04	0.4511371
07042011	03	0.004	0.000	0.001	0.000	0.000	0.000	0.000	0.000	0.002	0.000	0.001	298.199	0.848	0.2002120E-03	0.2237137	0.6211354E-04	0.5565062
07042011	04	0.004	0.000	0.000	0.000	0.000	0.000	0.000	0.000	0.002	0.000	0.001	298.222	0.817	NaN	0.1890359	0.9851766E-04	0.2830303
07042011	05	0.003	0.000	0.000	0.000	0.000	0.000	0.000	0.000	0.002	0.000	0.001	297.855	0.847	NaN	0.2237137	0.1099878E-03	0.3083481
07042011	06	0.003	0.000	0.000	0.000	0.000	0.000	0.000	0.000	0.003	0.000	0.002	297.572	0.881	NaN	0.5509642	0.2368951E-03	0.3665673
07042011	07	0.003	0.000	0.000	0.000	0.000	0.000	0.000	0.000	0.004	0.000	0.002	298.208	0.875	NaN	0.5509642	0.2118629E-03	0.4150685
07042011	08	0.003	0.000	0.001	0.000	0.000	0.000	0.000	0.000	0.005	0.000	0.003	299.940	0.820	0.2022386E-03	0.5671077	0.3592977E-03	0.1982112
07042011	09	0.001	0.000	0.003	0.000	0.000	0.000	0.000	0.000	0.009	0.000	0.005	301.235	0.762	0.1660585E-03	0.7235890	0.8575130E-03	-0.7374878E-01
07042011	10	0.002	0.000	0.004	0.000	0.000	0.000	0.000	0.000	0.011	0.000	0.006	302.854	0.688	0.9274483E-04	0.6772009	0.1092580E-02	-0.2077358
07042011	11	0.004	0.000	0.005	0.000	0.000	0.000	0.000	0.000	0.011	0.000	0.006	304.683	0.617	0.6896257E-04	0.5454546	0.8506814E-03	-0.1930084
07042011	12	0.002	0.000	0.006	0.000	0.000	0.000	0.000	0.000	0.010	0.000	0.005	305.856	0.572	0.2563000E-04	0.3930818	0.1025826E-02	-0.4165908
07042011	13	0.004	0.000	0.003	0.000	0.000	0.000	0.000	0.000	0.007	0.000	0.004	305.208	0.580	0.2956390E-04	0.3236246	0.6768200E-03	-0.3204316
07042011	14	0.008	0.000	0.001	0.000	0.000	0.000	0.000	0.000	0.005	0.000	0.003	305.522	0.570	0.3963709E-04	0.2358491	0.2722685E-03	-0.6236327E-01
07042011	15	0.011	0.000	0.001	0.000	0.000	0.000	0.000	0.000	0.004	0.000	0.002	305.881	0.552	0.3463030E-04	0.1484781	0.1220380E-03	0.8516744E-01
07042011	16	0.008	0.000	0.001	0.000	0.000	0.000	0.000	0.000	0.004	0.000	0.002	304.313	0.617	0.5060434E-04	0.1818182	0.1419641E-03	0.1074589
07042011	17	0.005	0.000	0.001	0.000	0.000	0.000	0.000	0.000	0.003	0.000	0.002	303.184	0.659	0.4011393E-04	0.2051282	0.2443406E-03	-0.7597026E-01
07042011	18	0.004	0.000	0.001	0.000	0.000	0.000	0.000	0.000	0.003	0.000	0.002	302.268	0.704	0.4708767E-04	0.2333723	0.2785311E-03	-0.7682452E-01
07042011	19	0.003	0.000	0.000	0.000	0.000	0.000	0.000	0.000	0.000	0.000	0.000	301.078	0.768	NaN	0.1000000E-10	0.1000000E-13	0.000000
07042011	20	0.005	0.000	0.000	0.000	0.000	0.000	0.000	0.000	0.000	0.000	0.000	299.754	0.823	NaN	0.1000000E-10	0.1000000E-13	0.000000
07042011	21	0.007	0.000	0.000	0.000	0.000	0.000	0.000	0.000	0.000	0.000	0.000	298.859	0.858	NaN	0.1000000E-10	0.1000000E-13	0.000000
07042011	22	0.007	0.000	0.000	0.000	0.000	0.000	0.000	0.000	0.000	0.000	0.000	298.228	0.879	NaN	0.1000000E-10	0.1000000E-13	0.000000
07042011	23	0.007	0.000	0.000	0.000	0.000	0.000	0.000	0.000	0.000	0.000	0.000	297.758	0.895	NaN	0.1000000E-10	0.1000000E-13	0.000000
07042011	24	0.009	0.000	0.000	0.000	0.000	0.000	0.000	0.000	0.000	0.000	0.000	297.440	0.907	NaN	0.1000000E-10	0.1000000E-13	0.000000
07052011	01	0.010	0.000	0.000	0.000	0.000	0.000	0.000	0.000	0.000	0.000	0.000	297.213	0.914	NaN	0.1000000E-10	0.1000000E-13	0.000000
07052011	02	0.011	0.000	0.000	0.000	0.000	0.000	0.000	0.000	0.000	0.000	0.000	297.028	0.918	NaN	0.1000000E-10	0.1000000E-13	0.000000
07052011	03	0.012	0.000	0.001	0.000	0.000	0.000	0.000	0.000	0.000	0.000	0.000	296.871	0.921	0.000000	0.1000000E-10	0.5311094E-15	1.274816
07052011	04	0.011	0.000	0.001	0.000	0.000	0.000	0.000	0.000	0.000	0.000	0.000	296.712	0.926	0.000000	0.1000000E-10	0.5677910E-15	1.245811
07052011	05	0.010	0.000	0.001	0.000	0.000	0.000	0.000	0.000	0.000	0.000	0.000	296.554	0.925	0.000000	0.1000000E-10	0.6118802E-15	1.213334
07052011	06	0.009	0.000	0.001	0.000	0.000	0.000	0.001	0.000	0.001	0.000	0.001	296.377	0.931	NaN	0.8136273	0.1396520E-04	1.765378
07052011	07	0.008	0.001	0.001	0.000	0.001	0.000	0.001	0.000	0.002	0.000	0.002	296.972	0.920	NaN	1.096103	0.2842211E-04	1.586195
07052011	08	0.014	0.003	0.002	0.001	0.002	0.000	0.001	0.001	0.005	0.000	0.005	298.303	0.888	0.1754969E-01	1.203080	0.1225096E-04	1.992124
07052011	09	0.016	0.009	0.004	0.000	0.002	0.000	0.001	0.002	0.010	0.000	0.008	299.734	0.836	NaN	1.781165	0.8657641E-04	1.313305
07052011	10	0.006	0.014	0.008	0.000	0.001	0.000	0.001	0.001	0.017	0.000	0.010	300.878	0.787	NaN	1.964124	0.1289315E-02	0.1828101
07052011	11	0.002	0.004	0.007	0.000	0.000	0.000	0.000	0.001	0.015	0.000	0.009	301.968	0.745	0.1256347E-01	1.392758	0.2982895E-02	-0.3307624
07052011	12	0.001	0.001	0.006	0.000	0.000	0.000	0.000	0.000	0.012	0.000	0.007	303.200	0.691	0.6042719E-03	0.7600288	0.3711449E-03	0.3112866
07052011	13	0.002	0.001	0.005	0.000	0.000	0.000	0.000	0.000	0.010	0.000	0.006	304.672	0.617	0.5444348E-02	0.5454546	0.2722173E-04	1.301843
07052011	14	0.002	0.000	0.004	0.000	0.000	0.000	0.000	0.000	0.009	0.000	0.005	304.961	0.599	0.2789497E-04	0.4284490	0.1200703E-02	-0.4475363
07052011	15	0.001	0.000	0.003	0.000	0.000	0.000	0.000	0.000	0.008	0.000	0.004	304.350	0.619	0.2521276E-04	0.3636364	0.1010578E-02	-0.4439026
07052011	16	0.002	0.001	0.003	0.000	0.000	0.000	0.000	0.000	0.008	0.000	0.005	303.542	0.650	0.6425381E-04	0.4970179	0.1025721E-02	-0.3146573
07052011	17	0.002	0.001	0.002	0.000	0.000	0.000	0.000	0.000	0.009	0.000	0.006	302.323	0.697	0.4828572E-03	0.6704105	0.3744889E-03	0.2529019
07052011	18	0.002	0.001	0.002	0.000	0.000	0.000	0.000	0.000	0.010	0.000	0.006	301.165	0.747	0.1474875E-01	0.8356546	0.2949748E-04	1.452242
07052011	19	0.002	0.001	0.002	0.000	0.000	0.000	0.000	0.000	0.010	0.000	0.006	300.147	0.795	0.1823205E-01	1.029160	0.3646401E-04	1.450618
07052011	20	0.002	0.001	0.001	0.000	0.000	0.000	0.000	0.000	0.010	0.000	0.006	299.046	0.828	0.3041929E-01	1.195219	0.3041935E-04	1.594298
07052011	21	0.003	0.001	0.001	0.000	0.000	0.000	0.000	0.000	0.012	0.000	0.006	298.273	0.855	0.1256645E-02	1.431981	0.3806245E-03	0.5754405
07052011	22	0.007	0.001	0.001	0.000	0.000	0.000	0.000	0.000	0.012	0.000	0.006	297.691	0.875	0.3262877E-02	1.652892	0.1748386E-03	0.9756073
07052011	23	0.009	0.001	0.001	0.000	0.000	0.000	0.001	0.000	0.011	0.000	0.006	297.248	0.888	NaN	1.915095	0.1220510E-03	1.195649
07052011	24	0.011	0.001	0.001	0.000	0.000	0.000	0.001	0.000	0.010	0.000	0.006	296.907	0.895	NaN	2.114745	0.1049724E-03	1.304183
07062011	01	0.014	0.001	0.002	0.000	0.000	0.000	0.001	0.000	0.010	0.000	0.006	296.620	0.901	NaN	2.374920	0.8498290E-04	1.446317
07062011	02	0.016	0.001	0.002	0.000	0.000	0.000	0.001	0.000	0.009	0.000	0.005	296.384	0.907	NaN	2.310533	0.5338394E-04	1.636302
07062011	03	0.017	0.001	0.002	0.000	0.000	0.000	0.001	0.000	0.009	0.000	0.005	296.234	0.910	NaN	2.314713	0.4924189E-04	1.672162
07062011	04	0.017	0.001	0.002	0.000	0.000	0.000	0.001	0.000	0.009	0.000	0.005	296.127	0.911	NaN	2.315294	0.4881054E-04	1.676093
07062011	05	0.018	0.001	0.002	0.000	0.000	0.000	0.001	0.000	0.009	0.000	0.005	296.040	0.913	NaN	2.318610	0.4545017E-04	1.707692
07062011	06	0.019	0.002	0.002	0.000	0.000	0.000	0.001	0.000	0.009	0.000	0.005	295.978	0.918	NaN	2.622971	0.4224556E-04	1.793012
07062011	07	0.019	0.002	0.002	0.000	0.001	0.000	0.001	0.000	0.009	0.000	0.006	296.672	0.918	NaN	3.021018	0.5379945E-04	1.749375
07062011	08	0.010	0.006	0.003	0.000	0.001	0.000	0.001	0.000	0.010	0.000	0.006	297.802	0.855	NaN	1.843191	0.1414167E-03	1.115070
07062011	09	0.002	0.023	0.007	0.000	0.001	0.000	0.000	0.000	0.014	0.000	0.008	299.273	0.796	0.5878210E-03	1.387869	0.8788970E-03	0.1984106
07062011	10	0.002	0.027	0.009	0.000	0.001	0.000	0.000	0.001	0.013	0.000	0.009	300.738	0.741	0.9259522E-02	1.090887	0.2401644E-02	-0.3427289
07062011	11	0.003	0.033	0.010	0.000	0.001	0.000	0.000	0.001	0.014	0.000	0.009	302.265	0.680	NaN	0.9795287	0.6726364E-02	-0.8367632
07062011	12	0.002	0.037	0.010	0.000	0.001	0.000	0.000	0.000	0.014	0.000	0.009	303.759	0.616	0.000000	0.8046725	0.2857642E-02	-0.5503887
07062011	13	0.001	0.040	0.010	0.000	0.000	0.000	0.000	0.000	0.015	0.000	0.008	305.082	0.562	0.4325986E-02	0.6111535	0.4326038E-04	1.150060
07062011	14	0.001	0.038	0.009	0.000	0.000	0.000	0.000	0.000	0.015	0.000	0.008	305.732	0.539	0.4165411E-02	0.5772005	0.3748961E-04	1.187416
07062011	15	0.002	0.037	0.010	0.000	0.000	0.000	0.000	0.000	0.015	0.000	0.008	305.672	0.538	0.3606081E-04	0.5772006	0.1678942E-02	-0.4637089
07062011	16	0.003	0.035	0.010	0.000	0.000	0.000	0.000	0.000	0.015	0.000	0.008	305.372	0.543	0.4750490E-04	0.5772006	0.1384319E-02	-0.3799095
07062011	17	0.004	0.032	0.010	0.000	0.000	0.000	0.000	0.000	0.016	0.000	0.009	304.791	0.554	0.6729364E-04	0.6681514	0.1437010E-02	-0.3325850
07062011	18	0.006	0.028	0.009	0.000	0.000	0.000	0.000	0.001	0.015	0.000	0.009	304.157	0.562	NaN	0.7371210	0.3313451E-02	-0.6527418
07062011	19	0.008	0.023	0.008	0.000	0.000	0.000	0.000	0.001	0.015	0.000	0.009	303.327	0.570	NaN	0.7973828	0.1497215E-02	-0.2736174
07062011	20	0.012	0.018	0.007	0.000	0.000	0.000	0.001	0.001	0.015	0.000	0.009	301.459	0.642	NaN	1.019911	0.3140722E-03	0.5115326
07062011	21	0.015	0.015	0.005	0.000	0.001	0.000	0.001	0.002	0.013	0.000	0.009	300.375	0.667	NaN	0.9716796	0.1300491E-03	0.8734158
07062011	22	0.018	0.013	0.006	0.001	0.001	0.000	0.002	0.002	0.012	0.000	0.010	299.581	0.698	0.9957075E-02	0.9227088	0.2521767E-04	1.563360
07062011	23	0.020	0.014	0.007	0.001	0.001	0.001	0.002	0.003	0.010	0.000	0.011	298.937	0.734	0.1088983E-01	1.087229	0.2609885E-04	1.619700
07062011	24	0.020	0.015	0.008	0.001	0.002	0.001	0.003	0.004	0.009	0.000	0.012	298.340	0.779	0.1140356E-01	1.306551	0.2732960E-04	1.679493
07072011	01	0.020	0.017	0.010	0.001	0.002	0.001	0.004	0.005	0.008	0.001	0.013	297.818	0.825	0.1168680E-01	1.614909	0.3226840E-04	1.699371
07072011	02	0.018	0.020	0.011	0.001	0.002	0.001	0.004	0.007	0.007	0.001	0.014	297.466	0.855	0.1522136E-01	1.686101	0.2295017E-04	1.866098
07072011	03	0.016	0.021	0.012	0.001	0.003	0.001	0.004	0.008	0.006	0.001	0.015	297.289	0.865	0.1834780E-01	1.820886	0.2174528E-04	1.922918
07072011	04	0.014	0.021	0.011	0.001	0.003	0.001	0.004	0.009	0.005	0.001	0.015	297.202	0.870	0.2027100E-01	1.571988	0.1323545E-04	2.074710
07072011	05	0.013	0.022	0.010	0.001	0.003	0.001	0.004	0.009	0.004	0.001	0.015	297.089	0.880	0.2028668E-01	1.679995	0.1485991E-04	2.053292
07072011	06	0.013	0.023	0.008	0.001	0.003	0.001	0.004	0.009	0.002	0.001	0.015	297.051	0.890	0.1990062E-01	1.803090	0.1699522E-04	2.025691
07072011	07	0.014	0.022	0.009	0.001	0.003	0.002	0.004	0.010	0.001	0.001	0.014	297.993	0.890	0.5302715E-01	1.298792	0.2310909E-05	2.749757
07072011	08	0.016	0.025	0.016	0.001	0.003	0.002	0.004	0.010	0.001	0.001	0.013	300.734	0.807	0.1578271E-01	0.5553063	0.1055010E-05	2.721276
07072011	09	0.018	0.109	0.032	0.000	0.003	0.001	0.002	0.005	0.006	0.001	0.011	302.254	0.734	NaN	2.106530	0.1127460E-01	-0.7285334
07072011	10	0.003	0.157	0.036	0.000	0.001	0.000	0.001	0.002	0.016	0.000	0.013	303.760	0.652	0.1112103E-02	1.062734	0.3145138E-02	-0.4712151
07072011	11	0.001	0.095	0.025	0.000	0.001	0.000	0.001	0.001	0.014	0.000	0.013	304.951	0.598	0.4237890E-04	0.8714492	0.1840369E-02	-0.3246628
07072011	12	0.001	0.061	0.019	0.000	0.000	0.000	0.000	0.001	0.014	0.000	0.014	305.913	0.550	0.1037121E-04	0.8081037	0.9116018E-03	-0.5233802E-01
07072011	13	0.001	0.044	0.017	0.000	0.000	0.000	0.000	0.001	0.014	0.000	0.014	306.850	0.506	0.6794930E-05	0.6977662	0.7758905E-03	-0.4609049E-01
07072011	14	0.001	0.030	0.014	0.000	0.000	0.000	0.000	0.001	0.014	0.000	0.013	307.700	0.482	0.6914139E-05	0.5655457	0.9037532E-03	-0.2035821
07072011	15	0.001	0.017	0.011	0.000	0.000	0.000	0.000	0.001	0.013	0.000	0.011	307.280	0.483	0.8940697E-05	0.4580570	0.1300127E-02	-0.4530662
07072011	16	0.001	0.008	0.008	0.000	0.000	0.000	0.000	0.000	0.011	0.000	0.009	306.831	0.494	0.7450581E-05	0.4335392	0.2206130E-03	0.2933973
07072011	17	0.001	0.005	0.007	0.000	0.000	0.000	0.000	0.000	0.010	0.000	0.007	306.042	0.512	0.1513958E-04	0.3674300	0.6594217E-03	-0.2539886
07072011	18	0.002	0.004	0.005	0.000	0.000	0.000	0.000	0.000	0.010	0.000	0.006	305.120	0.532	0.4252017E-02	0.4207574	0.2126016E-04	1.296465
07072011	19	0.003	0.003	0.004	0.000	0.000	0.000	0.000	0.001	0.011	0.000	0.006	303.941	0.560	NaN	0.4507044	0.1011484E-02	-0.3510674
07072011	20	0.006	0.003	0.004	0.000	0.000	0.000	0.001	0.001	0.010	0.000	0.006	302.165	0.619	NaN	0.5629893	0.3112901E-03	0.2573349
07072011	21	0.009	0.003	0.004	0.000	0.000	0.000	0.001	0.001	0.009	0.000	0.007	300.873	0.636	NaN	0.6967804	0.3717431E-03	0.2728530
07072011	22	0.011	0.006	0.005	0.000	0.000	0.000	0.001	0.001	0.009	0.000	0.007	299.917	0.655	NaN	0.8043755	0.2623361E-03	0.4866007
07072011	23	0.013	0.009	0.006	0.000	0.001	0.000	0.001	0.001	0.009	0.000	0.007	299.128	0.690	NaN	0.9824090	0.1634571E-03	0.7788886
07072011	24	0.015	0.011	0.007	0.000	0.001	0.000	0.001	0.001	0.009	0.000	0.007	298.392	0.742	NaN	1.273872	0.1338679E-03	0.9784492
07082011	01	0.016	0.012	0.007	0.000	0.001	0.000	0.002	0.002	0.008	0.000	0.007	297.716	0.802	NaN	1.528336	0.6862274E-04	1.347751
07082011	02	0.017	0.012	0.008	0.000	0.001	0.000	0.002	0.002	0.008	0.000	0.007	297.252	0.843	NaN	2.086290	0.7395786E-04	1.450390
07082011	03	0.018	0.011	0.008	0.000	0.001	0.001	0.002	0.002	0.007	0.000	0.007	297.003	0.860	NaN	2.453308	0.5066078E-04	1.685080
07082011	04	0.017	0.009	0.007	0.000	0.001	0.001	0.002	0.002	0.007	0.000	0.007	296.829	0.869	NaN	2.481725	0.4892734E-04	1.705202
07082011	05	0.016	0.007	0.006	0.000	0.001	0.001	0.002	0.002	0.006	0.000	0.007	296.693	0.875	NaN	2.505161	0.5068033E-04	1.693996
07082011	06	0.015	0.005	0.004	0.000	0.001	0.001	0.002	0.002	0.006	0.000	0.007	296.662	0.881	NaN	2.123017	0.3986391E-04	1.726374
07082011	07	0.016	0.003	0.003	0.000	0.001	0.001	0.002	0.003	0.006	0.000	0.007	297.572	0.888	NaN	1.817806	0.2080532E-04	1.941373
07082011	08	0.013	0.003	0.002	0.000	0.001	0.001	0.002	0.003	0.006	0.000	0.007	300.114	0.804	NaN	0.9149216	0.2181489E-04	1.622631
07082011	09	0.006	0.007	0.008	0.000	0.001	0.000	0.001	0.001	0.010	0.000	0.007	301.954	0.734	NaN	1.114845	0.1591440E-02	-0.1545759
07082011	10	0.003	0.027	0.009	0.000	0.001	0.000	0.001	0.001	0.012	0.000	0.008	303.914	0.639	NaN	0.7864157	0.4786085E-02	-0.7843282
07082011	11	0.003	0.059	0.009	0.000	0.001	0.000	0.000	0.000	0.015	0.000	0.009	305.333	0.575	0.5888939E-04	0.7258427	0.1657075E-02	-0.3584996
07082011	12	0.007	0.052	0.008	0.000	0.001	0.000	0.000	0.000	0.015	0.000	0.008	306.578	0.527	0.8291006E-04	0.5793656	0.6889282E-03	-0.7522135E-01
07082011	13	0.007	0.027	0.007	0.000	0.001	0.000	0.000	0.001	0.017	0.000	0.010	305.987	0.531	NaN	0.7651587	0.1353591E-02	-0.2477361
07082011	14	0.005	0.009	0.006	0.000	0.001	0.000	0.001	0.001	0.021	0.000	0.012	305.309	0.568	NaN	0.9591057	0.1497848E-02	-0.1936013
07082011	15	0.010	0.006	0.006	0.001	0.001	0.000	0.001	0.001	0.020	0.000	0.012	305.646	0.544	0.6690860E-02	0.7896439	0.1717484E-04	1.662539
07082011	16	0.011	0.004	0.005	0.001	0.000	0.000	0.001	0.001	0.020	0.000	0.012	305.460	0.549	0.7508695E-02	0.7943954	0.1583011E-04	1.700553
07082011	17	0.010	0.001	0.005	0.000	0.000	0.000	0.001	0.001	0.019	0.000	0.011	305.285	0.540	NaN	0.7989510	0.5796920E-03	0.1393228
07082011	18	0.011	0.001	0.004	0.000	0.000	0.000	0.001	0.001	0.015	0.000	0.009	304.954	0.533	NaN	0.6206504	0.3456788E-03	0.2541743
07082011	19	0.011	0.000	0.002	0.001	0.000	0.000	0.001	0.001	0.014	0.000	0.008	303.990	0.587	0.8716702E-02	0.5616656	0.7747859E-05	1.860296
07082011	20	0.011	0.000	0.002	0.001	0.000	0.000	0.001	0.001	0.013	0.000	0.007	302.115	0.656	0.9887993E-02	0.5983257	0.8727845E-05	1.836031
07082011	21	0.009	0.000	0.001	0.001	0.000	0.000	0.001	0.001	0.012	0.000	0.007	301.169	0.671	0.1439548E-01	0.6186138	0.7277608E-05	1.929431
07082011	22	0.007	0.000	0.001	0.001	0.000	0.000	0.001	0.001	0.011	0.000	0.006	300.672	0.659	0.1193655E-01	0.4957616	0.6135013E-05	1.907457
07082011	23	0.005	0.000	0.001	0.001	0.000	0.000	0.001	0.001	0.011	0.000	0.006	299.884	0.706	0.1415098E-01	0.5896392	0.7067652E-05	1.921311
07082011	24	0.004	0.000	0.001	0.002	0.000	0.000	0.001	0.001	0.011	0.000	0.007	299.187	0.774	0.1882178E-01	0.8927463	0.1113668E-04	1.903973
07092011	01	0.002	0.000	0.001	0.001	0.000	0.000	0.001	0.001	0.011	0.000	0.007	298.645	0.831	0.2675813E-01	1.184113	0.1217008E-04	1.988100
07092011	02	0.002	0.000	0.001	0.002	0.000	0.000	0.001	0.001	0.012	0.000	0.007	298.251	0.873	0.2793962E-01	1.522659	0.1497822E-04	2.007142
07092011	03	0.002	0.000	0.001	0.002	0.001	0.000	0.001	0.001	0.012	0.000	0.008	298.210	0.872	0.3259671E-01	1.789425	0.1787122E-04	2.000559
07092011	04	0.004	0.000	0.001	0.002	0.002	0.000	0.001	0.001	0.011	0.000	0.009	298.220	0.866	0.3722554E-01	2.056191	0.2075342E-04	1.995974
07092011	05	0.004	0.001	0.001	0.002	0.003	0.000	0.001	0.001	0.010	0.000	0.009	298.037	0.906	0.4613996E-01	2.912752	0.2408850E-04	2.082494
07092011	06	0.003	0.002	0.001	0.002	0.004	0.000	0.001	0.002	0.008	0.000	0.009	298.017	0.915	0.4325551E-01	2.861162	0.2234227E-04	2.107415
07092011	07	0.003	0.004	0.002	0.002	0.004	0.000	0.001	0.002	0.006	0.000	0.008	298.823	0.903	0.000000	3.294515	0.2136463E-02	0.1880961
07092011	08	0.005	0.009	0.006	0.003	0.004	0.000	0.001	0.003	0.005	0.001	0.008	300.743	0.833	0.7780373E-02	1.042084	0.2080390E-04	1.699758
07092011	09	0.009	0.016	0.011	0.002	0.003	0.000	0.001	0.003	0.006	0.001	0.008	302.100	0.779	0.4844189E-02	0.8227993	0.2114208E-04	1.590146
07092011	10	0.011	0.020	0.015	0.002	0.003	0.000	0.001	0.002	0.008	0.001	0.009	303.895	0.707	0.4432380E-02	0.8835976	0.2687453E-04	1.516914
07092011	11	0.011	0.023	0.017	0.001	0.002	0.000	0.001	0.002	0.010	0.001	0.009	305.480	0.644	0.3194571E-02	0.6927817	0.2143341E-04	1.509505
07092011	12	0.009	0.024	0.022	0.001	0.001	0.000	0.001	0.002	0.011	0.001	0.009	306.681	0.592	0.2296746E-02	0.5799137	0.1899524E-04	1.484719
07092011	13	0.008	0.024	0.021	0.001	0.001	0.000	0.001	0.001	0.013	0.001	0.009	307.711	0.550	0.2284408E-02	0.5899910	0.1792384E-04	1.517414
07092011	14	0.004	0.010	0.013	0.001	0.001	0.000	0.001	0.001	0.017	0.001	0.011	306.546	0.578	0.4183114E-02	0.8058134	0.2211779E-04	1.561493
07092011	15	0.006	0.001	0.005	0.001	0.000	0.000	0.001	0.001	0.017	0.000	0.010	306.121	0.597	0.6644666E-02	0.7504677	0.1243482E-04	1.780693
07092011	16	0.010	0.000	0.003	0.001	0.000	0.000	0.000	0.001	0.012	0.000	0.007	305.999	0.600	0.5950928E-02	0.5141388	0.7515931E-05	1.835098
07092011	17	0.012	0.000	0.002	0.000	0.000	0.000	0.000	0.000	0.009	0.000	0.005	306.092	0.587	0.1034737E-03	0.4163197	0.2875500E-03	0.1607137
07092011	18	0.013	0.000	0.002	0.000	0.000	0.000	0.000	0.000	0.007	0.000	0.004	305.608	0.584	0.9566545E-04	0.3236246	0.2087811E-03	0.1903503
07092011	19	0.012	0.000	0.002	0.000	0.000	0.000	0.000	0.000	0.007	0.000	0.004	304.429	0.606	0.1337528E-03	0.3530450	0.2046629E-03	0.2367910
07092011	20	0.011	0.000	0.002	0.000	0.000	0.000	0.000	0.000	0.006	0.000	0.003	302.435	0.705	0.2575517E-03	0.3618818	0.1192006E-03	0.4822884
07092011	21	0.011	0.000	0.002	0.000	0.000	0.000	0.001	0.000	0.006	0.000	0.004	301.427	0.741	NaN	0.6419534	0.1121850E-03	0.7575687
07092011	22	0.010	0.000	0.002	0.000	0.000	0.000	0.001	0.000	0.005	0.000	0.003	300.912	0.744	NaN	0.5150206	0.7129390E-04	0.8587723
07092011	23	0.010	0.000	0.002	0.000	0.000	0.000	0.000	0.000	0.005	0.000	0.003	300.260	0.776	0.5111098E-03	0.4709576	0.1108676E-03	0.6281773
07092011	24	0.010	0.000	0.001	0.001	0.000	0.000	0.000	0.000	0.004	0.000	0.003	299.815	0.800	0.5722642E-03	0.5145798	0.1157662E-03	0.6478710
07102011	01	0.009	0.000	0.001	0.000	0.000	0.000	0.000	0.000	0.004	0.000	0.002	299.486	0.805	0.4891157E-03	0.3597122	0.6619988E-04	0.7350981
07102011	02	0.006	0.000	0.000	0.000	0.000	0.000	0.000	0.000	0.003	0.000	0.002	298.994	0.843	NaN	0.4219410	0.1680044E-03	0.3999311
07102011	03	0.005	0.000	0.000	0.000	0.000	0.000	0.000	0.000	0.002	0.000	0.001	298.704	0.869	NaN	0.2557545	0.8689077E-04	0.4688496
07102011	04	0.005	0.000	0.000	0.000	0.000	0.000	0.000	0.000	0.003	0.000	0.002	298.653	0.870	NaN	0.5115089	0.1874320E-03	0.4360096
07102011	05	0.005	0.000	0.000	0.000	0.000	0.000	0.000	0.000	0.005	0.000	0.003	298.561	0.882	NaN	0.8264462	0.2707710E-03	0.4846124
07102011	06	0.004	0.000	0.001	0.000	0.000	0.000	0.000	0.000	0.009	0.000	0.005	298.566	0.898	0.1621127E-02	1.639344	0.2866465E-03	0.7573236
07102011	07	0.006	0.000	0.002	0.001	0.000	0.000	0.000	0.000	0.011	0.000	0.006	299.450	0.888	0.1925230E-02	1.796407	0.2579372E-03	0.8428909
07102011	08	0.012	0.000	0.003	0.000	0.000	0.000	0.000	0.000	0.012	0.000	0.007	301.030	0.826	0.1622677E-02	1.394422	0.2144013E-03	0.8131669
07102011	09	0.005	0.001	0.006	0.000	0.000	0.000	0.000	0.001	0.011	0.000	0.007	302.314	0.778	NaN	1.189986	0.1741860E-02	-0.1654716
07102011	10	0.005	0.000	0.006	0.000	0.000	0.000	0.000	0.001	0.009	0.000	0.006	303.827	0.717	NaN	0.8127714	0.1772223E-02	-0.3385499
07102011	11	0.006	0.000	0.005	0.000	0.000	0.000	0.000	0.001	0.008	0.000	0.005	305.111	0.671	NaN	0.6066322	0.5890356E-03	0.1278394E-01
07102011	12	0.006	0.000	0.005	0.000	0.000	0.000	0.000	0.001	0.008	0.000	0.005	306.096	0.622	NaN	0.5095443	0.5915290E-03	-0.6479405E-01
07102011	13	0.008	0.000	0.004	0.000	0.000	0.000	0.000	0.001	0.007	0.000	0.005	307.366	0.566	NaN	0.4115514	0.3695324E-03	0.4677160E-01
07102011	14	0.010	0.000	0.002	0.000	0.000	0.000	0.000	0.001	0.005	0.000	0.003	307.473	0.566	NaN	0.2129088	0.7068642E-04	0.4788575
07102011	15	0.010	0.000	0.002	0.000	0.000	0.000	0.000	0.000	0.004	0.000	0.003	306.372	0.609	0.4518032E-04	0.2647838	0.2427327E-03	0.3776314E-01
07102011	16	0.010	0.000	0.002	0.000	0.000	0.000	0.000	0.000	0.004	0.000	0.002	305.332	0.646	0.5805492E-04	0.1988072	0.1170352E-03	0.2301155
07102011	17	0.008	0.000	0.002	0.000	0.000	0.000	0.000	0.000	0.003	0.000	0.002	304.216	0.676	0.6091595E-04	0.2185793	0.1501988E-03	0.1629426
07102011	18	0.009	0.000	0.002	0.000	0.000	0.000	0.000	0.000	0.003	0.000	0.002	303.140	0.716	0.1102090E-03	0.2496879	0.1149783E-03	0.3367818
07102011	19	0.011	0.000	0.002	0.000	0.000	0.000	0.000	0.000	0.003	0.000	0.002	301.759	0.770	0.2511740E-03	0.3012048	0.7635607E-04	0.5960184
07102011	20	0.013	0.000	0.002	0.000	0.000	0.000	0.000	0.000	0.003	0.000	0.002	300.520	0.812	0.5170703E-03	0.3597122	0.5345327E-04	0.8279809
07102011	21	0.014	0.000	0.003	0.000	0.000	0.000	0.000	0.000	0.003	0.000	0.002	299.784	0.836	0.8291006E-03	0.4219410	0.4344196E-04	0.9873424
07102011	22	0.014	0.000	0.003	0.000	0.000	0.000	0.000	0.000	0.003	0.000	0.002	299.311	0.854	0.1000822E-02	0.4474273	0.4085190E-04	1.039510
07102011	23	0.013	0.000	0.003	0.000	0.000	0.000	0.001	0.000	0.003	0.000	0.002	298.906	0.874	NaN	1.005398	0.3416887E-04	1.468707
07102011	24	0.011	0.000	0.002	0.000	0.000	0.000	0.001	0.000	0.002	0.000	0.002	298.656	0.894	NaN	0.9897230	0.3958109E-04	1.398026
07112011	01	0.009	0.000	0.001	0.000	0.000	0.000	0.001	0.000	0.002	0.000	0.001	298.505	0.910	NaN	0.6151582	0.1308765E-04	1.672125
07112011	02	0.006	0.000	0.001	0.000	0.000	0.000	0.001	0.000	0.001	0.000	0.001	298.478	0.905	NaN	0.6037503	0.2347254E-04	1.410297
07112011	03	0.004	0.000	0.001	0.000	0.000	0.000	0.000	0.000	0.001	0.000	0.001	298.381	0.914	0.3145933E-03	0.3636364	0.6698921E-04	0.7346625
07112011	04	0.004	0.000	0.001	0.000	0.000	0.000	0.000	0.000	0.001	0.000	0.001	298.349	0.922	0.3743172E-03	0.4081632	0.6428233E-04	0.8027423
07112011	05	0.004	0.000	0.000	0.000	0.000	0.000	0.000	0.000	0.001	0.000	0.001	298.304	0.929	NaN	0.4672897	0.1230458E-03	0.5795195
07112011	06	0.005	0.000	0.000	0.000	0.000	0.000	0.000	0.000	0.002	0.000	0.001	298.354	0.928	NaN	0.4672897	0.9242761E-04	0.7037845
07112011	07	0.007	0.000	0.001	0.000	0.000	0.000	0.000	0.000	0.002	0.000	0.001	299.175	0.922	0.6613135E-03	0.4081632	0.3028279E-04	1.129638
07112011	08	0.007	0.000	0.001	0.000	0.000	0.000	0.000	0.000	0.002	0.000	0.001	300.603	0.864	0.2208948E-03	0.2386635	0.4165475E-04	0.7581214
07112011	09	0.001	0.000	0.001	0.000	0.000	0.000	0.000	0.000	0.003	0.000	0.002	301.225	0.845	0.8469820E-04	0.4474273	0.4714797E-03	-0.2274050E-01
07112011	10	0.000	0.000	0.000	0.000	0.000	0.000	0.000	0.000	0.000	0.000	0.000	302.074	0.824	NaN	0.1000000E-10	0.000000	Infinity
07112011	11	0.004	0.000	0.000	0.000	0.000	0.000	0.000	0.000	0.000	0.000	0.000	303.022	0.799	NaN	0.1000000E-10	0.1000000E-13	0.000000
07112011	12	0.004	0.000	0.001	0.000	0.000	0.000	0.000	0.000	0.000	0.000	0.000	303.830	0.781	0.000000	0.1000000E-10	0.3021124E-14	0.5198315
07112011	13	0.005	0.000	0.001	0.000	0.000	0.000	0.000	0.000	0.001	0.000	0.001	304.637	0.743	0.2104044E-04	0.1342282	0.1292009E-03	0.1657811E-01
07112011	14	0.005	0.000	0.001	0.000	0.000	0.000	0.000	0.000	0.001	0.000	0.001	304.935	0.746	0.2092123E-04	0.1392758	0.1301196E-03	0.2953268E-01
07112011	15	0.004	0.000	0.001	0.000	0.000	0.000	0.000	0.000	0.002	0.000	0.001	304.594	0.759	0.2402067E-04	0.1447178	0.1247520E-03	0.6447442E-01
07112011	16	0.003	0.000	0.001	0.000	0.000	0.000	0.000	0.000	0.003	0.000	0.001	304.279	0.763	0.2592802E-04	0.1447178	0.1217937E-03	0.7489707E-01
07112011	17	0.003	0.000	0.002	0.000	0.000	0.000	0.000	0.000	0.003	0.000	0.002	303.411	0.763	0.3820658E-04	0.2894356	0.3711192E-03	-0.1079614
07112011	18	0.003	0.000	0.002	0.000	0.000	0.000	0.000	0.000	0.004	0.000	0.002	303.480	0.772	0.5465746E-04	0.3012048	0.2722093E-03	0.4395902E-01
07112011	19	0.003	0.000	0.002	0.000	0.000	0.000	0.000	0.000	0.004	0.000	0.002	302.689	0.786	0.7450581E-04	0.3278689	0.2481016E-03	0.1210706
07112011	20	0.005	0.000	0.001	0.000	0.000	0.000	0.000	0.000	0.004	0.000	0.002	301.416	0.836	0.2276301E-03	0.4219410	0.1277570E-03	0.5188669
07112011	21	0.007	0.000	0.001	0.000	0.000	0.000	0.000	0.000	0.004	0.000	0.003	300.676	0.852	0.4506111E-03	0.6711410	0.1714668E-03	0.5926336
07112011	22	0.009	0.000	0.001	0.000	0.000	0.000	0.000	0.000	0.005	0.000	0.003	300.186	0.862	0.8498430E-03	0.7159904	0.1028164E-03	0.8428447
07112011	23	0.009	0.000	0.001	0.000	0.000	0.000	0.001	0.000	0.005	0.000	0.003	299.788	0.873	NaN	0.8886635	0.6753049E-04	1.119237
07112011	24	0.008	0.000	0.001	0.000	0.000	0.000	0.001	0.000	0.005	0.000	0.003	299.414	0.888	NaN	1.045037	0.7359858E-04	1.152262
07122011	01	0.008	0.000	0.001	0.000	0.000	0.000	0.001	0.000	0.005	0.000	0.003	299.041	0.905	NaN	1.283137	0.7028699E-04	1.261398
07122011	02	0.007	0.000	0.001	0.000	0.000	0.000	0.001	0.000	0.006	0.000	0.004	298.812	0.903	NaN	1.438972	0.1271571E-03	1.053712
07122011	03	0.006	0.000	0.001	0.000	0.000	0.000	0.001	0.000	0.006	0.000	0.004	298.531	0.919	NaN	1.773028	0.1493325E-03	1.074561
07122011	04	0.006	0.000	0.001	0.000	0.001	0.000	0.001	0.000	0.006	0.000	0.004	298.347	0.927	NaN	2.085676	0.1078010E-03	1.286624
07122011	05	0.006	0.000	0.001	0.000	0.001	0.000	0.001	0.000	0.007	0.000	0.004	298.182	0.934	NaN	2.106907	0.9138012E-04	1.362794
07122011	06	0.003	0.000	0.001	0.000	0.001	0.000	0.001	0.000	0.008	0.000	0.005	297.991	0.942	NaN	2.760223	0.2619570E-03	1.022714
07122011	07	0.002	0.000	0.001	0.000	0.000	0.000	0.001	0.000	0.008	0.000	0.006	298.359	0.943	0.1601255E-01	3.232580	0.1833328E-02	0.2463090
07122011	08	0.001	0.000	0.001	0.000	0.000	0.000	0.000	0.000	0.009	0.000	0.009	299.695	0.899	0.7150173E-03	2.966137	0.1784984E-02	0.2205569
07122011	09	0.001	0.000	0.002	0.000	0.000	0.000	0.000	0.000	0.011	0.000	0.012	301.188	0.841	0.2004504E-03	2.586207	0.2319143E-02	0.4733576E-01
07122011	10	0.001	0.001	0.004	0.000	0.000	0.000	0.000	0.000	0.012	0.000	0.011	302.854	0.766	0.1158714E-03	1.602082	0.1079540E-02	0.1714461
07122011	11	0.001	0.001	0.006	0.000	0.000	0.000	0.000	0.000	0.011	0.000	0.010	304.524	0.709	0.5257130E-04	1.123929	0.6632771E-03	0.2290439
07122011	12	0.001	0.001	0.006	0.000	0.000	0.000	0.000	0.000	0.010	0.000	0.009	306.350	0.641	0.2336502E-04	0.7679416	0.3651116E-03	0.3229026
07122011	13	0.001	0.001	0.007	0.000	0.000	0.000	0.000	0.000	0.010	0.000	0.009	307.848	0.581	0.1245737E-04	0.6159552	0.2261094E-03	0.4352305
07122011	14	0.001	0.002	0.008	0.000	0.000	0.000	0.000	0.000	0.010	0.000	0.009	308.330	0.567	0.1114607E-04	0.5941156	0.2044225E-03	0.4633422
07122011	15	0.001	0.004	0.009	0.000	0.000	0.000	0.000	0.000	0.011	0.000	0.010	307.836	0.581	0.1263618E-04	0.6873329	0.2392505E-03	0.4583143
07122011	16	0.001	0.005	0.011	0.000	0.000	0.000	0.000	0.000	0.012	0.000	0.010	307.077	0.602	0.2217293E-04	0.7256297	0.3684022E-03	0.2943928
07122011	17	0.001	0.006	0.010	0.000	0.000	0.000	0.000	0.000	0.012	0.000	0.010	306.017	0.629	0.3057718E-04	0.8103428	0.4619944E-03	0.2440321
07122011	18	0.001	0.005	0.009	0.000	0.000	0.000	0.000	0.000	0.012	0.000	0.012	304.792	0.659	0.2092123E-04	1.133909	0.6178612E-03	0.2636872
07122011	19	0.001	0.004	0.008	0.000	0.000	0.000	0.000	0.000	0.013	0.000	0.011	303.452	0.690	0.6163120E-04	1.125297	0.7605693E-03	0.1701285
07122011	20	0.002	0.003	0.007	0.000	0.000	0.000	0.000	0.000	0.015	0.000	0.010	301.617	0.754	0.5429983E-03	1.308983	0.9285391E-03	0.1491337
07122011	21	0.002	0.002	0.005	0.000	0.000	0.000	0.000	0.000	0.017	0.000	0.009	300.576	0.787	0.4861951E-03	1.475410	0.1047595E-02	0.1487192
07122011	22	0.005	0.002	0.005	0.000	0.000	0.000	0.000	0.000	0.016	0.000	0.009	299.946	0.810	0.9418726E-03	1.618705	0.6553835E-03	0.3926722
07122011	23	0.007	0.001	0.004	0.000	0.000	0.000	0.000	0.000	0.014	0.000	0.007	299.467	0.839	0.1798689E-02	1.476793	0.2592057E-03	0.7556751
07122011	24	0.007	0.001	0.003	0.000	0.000	0.000	0.000	0.000	0.013	0.000	0.007	298.976	0.879	0.3094137E-02	1.928375	0.2399985E-03	0.9049830
07132011	01	0.005	0.000	0.001	0.000	0.000	0.000	0.000	0.000	0.011	0.000	0.006	298.565	0.916	0.3375471E-02	2.448980	0.2497241E-03	0.9915248
07132011	02	0.003	0.000	0.001	0.000	0.000	0.000	0.000	0.000	0.010	0.000	0.005	298.361	0.920	0.2245724E-02	2.040816	0.2641508E-03	0.8879520
07132011	03	0.002	0.000	0.001	0.000	0.000	0.000	0.000	0.000	0.010	0.000	0.005	298.187	0.929	0.2190471E-02	2.336448	0.3230711E-03	0.8592581
07132011	04	0.003	0.000	0.001	0.000	0.000	0.000	0.000	0.000	0.010	0.000	0.005	297.943	0.951	0.4865706E-02	3.311258	0.2310285E-03	1.156327
07132011	05	0.003	0.000	0.001	0.000	0.001	0.000	0.000	0.000	0.011	0.000	0.006	297.788	0.960	0.9570718E-02	5.042017	0.2425571E-03	1.317790
07132011	06	0.004	0.001	0.001	0.000	0.002	0.000	0.001	0.000	0.011	0.000	0.007	297.734	0.955	NaN	5.906713	0.2496215E-03	1.374064
07132011	07	0.006	0.001	0.001	0.000	0.003	0.000	0.001	0.001	0.010	0.000	0.007	298.449	0.946	NaN	4.288444	0.1024851E-03	1.621639
07132011	08	0.009	0.004	0.003	0.001	0.004	0.000	0.001	0.001	0.008	0.000	0.008	300.128	0.901	0.2502728E-01	2.310909	0.2328999E-04	1.996614
07132011	09	0.010	0.009	0.005	0.001	0.003	0.000	0.001	0.001	0.007	0.000	0.006	301.674	0.846	0.9885550E-02	1.145607	0.1567574E-04	1.863808
07132011	10	0.008	0.010	0.006	0.000	0.001	0.000	0.000	0.001	0.007	0.000	0.005	303.091	0.791	NaN	1.137125	0.4061270E-03	0.4471462
07132011	11	0.007	0.006	0.007	0.000	0.001	0.000	0.000	0.000	0.007	0.000	0.004	304.401	0.744	0.1954436E-03	0.5539738	0.2397722E-03	0.3636904
07132011	12	0.005	0.004	0.009	0.000	0.000	0.000	0.000	0.000	0.009	0.000	0.005	305.676	0.684	0.7349253E-04	0.5464481	0.6082989E-03	-0.4656811E-01
07132011	13	0.001	0.002	0.009	0.000	0.000	0.000	0.000	0.000	0.011	0.000	0.006	306.449	0.650	0.3930986E-02	0.5964214	0.3537910E-04	1.226806
07132011	14	0.001	0.002	0.009	0.000	0.000	0.000	0.000	0.000	0.012	0.000	0.006	306.545	0.650	0.3534555E-04	0.5964215	0.1336280E-02	-0.3503441
07132011	15	0.001	0.001	0.008	0.000	0.000	0.000	0.000	0.000	0.011	0.000	0.006	305.793	0.667	0.4563868E-02	0.6349207	0.3651121E-04	1.240293
07132011	16	0.002	0.001	0.006	0.000	0.000	0.000	0.000	0.000	0.009	0.000	0.006	303.467	0.728	0.5775690E-03	0.7478791	0.3299892E-03	0.3553317
07132011	17	0.002	0.000	0.005	0.000	0.000	0.000	0.000	0.000	0.009	0.000	0.006	302.841	0.771	0.8606911E-03	0.8771349	0.3144630E-03	0.4454969
07132011	18	0.002	0.001	0.005	0.000	0.000	0.000	0.000	0.000	0.010	0.000	0.006	301.649	0.801	0.1064652E-01	1.029160	0.5323251E-04	1.286306
07132011	19	0.004	0.001	0.005	0.000	0.000	0.000	0.000	0.000	0.010	0.000	0.006	300.809	0.836	0.4906654E-03	1.265823	0.5891525E-03	0.3321452
07132011	20	0.006	0.001	0.005	0.000	0.000	0.000	0.000	0.000	0.009	0.000	0.005	299.543	0.858	0.1103699E-02	1.193317	0.2436111E-03	0.6900588
07132011	21	0.008	0.002	0.005	0.000	0.000	0.000	0.001	0.000	0.008	0.000	0.005	298.731	0.889	NaN	2.348819	0.3435996E-03	0.8347970
07132011	22	0.008	0.003	0.004	0.000	0.000	0.000	0.001	0.001	0.008	0.000	0.005	298.230	0.906	NaN	2.416390	0.1462918E-03	1.217947
07132011	23	0.009	0.003	0.003	0.000	0.000	0.000	0.001	0.001	0.007	0.000	0.005	297.941	0.909	NaN	2.165227	0.1146076E-03	1.276290
07132011	24	0.010	0.003	0.004	0.000	0.000	0.000	0.001	0.001	0.007	0.000	0.005	297.709	0.916	NaN	2.768015	0.1217678E-03	1.356636
07142011	01	0.010	0.003	0.004	0.000	0.001	0.000	0.001	0.001	0.006	0.000	0.005	297.589	0.912	NaN	2.456265	0.1093408E-03	1.351493
07142011	02	0.010	0.004	0.004	0.000	0.001	0.000	0.001	0.001	0.006	0.000	0.005	297.462	0.916	NaN	2.786120	0.1099091E-03	1.403966
07142011	03	0.010	0.004	0.004	0.000	0.001	0.000	0.002	0.001	0.005	0.000	0.005	297.357	0.919	NaN	2.789398	0.9329358E-04	1.475659
07142011	04	0.009	0.004	0.004	0.000	0.001	0.000	0.002	0.001	0.006	0.000	0.005	297.249	0.925	NaN	3.225039	0.9514479E-04	1.530150
07142011	05	0.008	0.004	0.003	0.000	0.001	0.000	0.002	0.001	0.006	0.000	0.005	297.180	0.920	NaN	2.478337	0.8298843E-04	1.475143
07142011	06	0.009	0.003	0.003	0.000	0.001	0.000	0.002	0.001	0.006	0.000	0.006	297.081	0.932	NaN	3.271632	0.1251062E-03	1.417486
07142011	07	0.009	0.003	0.003	0.000	0.001	0.000	0.002	0.001	0.006	0.000	0.006	297.940	0.907	NaN	2.500650	0.1329579E-03	1.274339
07142011	08	0.010	0.005	0.006	0.001	0.002	0.000	0.002	0.001	0.007	0.000	0.007	299.884	0.855	0.1236212E-01	1.432638	0.2204042E-04	1.812917
07142011	09	0.027	0.031	0.011	0.000	0.002	0.000	0.002	0.001	0.013	0.000	0.010	301.466	0.810	NaN	2.756773	0.1256467E-03	1.341250
07142011	10	0.041	0.054	0.015	0.000	0.001	0.000	0.002	0.001	0.016	0.000	0.010	303.149	0.749	NaN	2.329729	0.7273748E-04	1.505547
07142011	11	0.033	0.055	0.020	0.000	0.001	0.000	0.001	0.001	0.019	0.000	0.011	304.661	0.692	NaN	2.180477	0.1594247E-03	1.135996
07142011	12	0.009	0.016	0.015	0.000	0.000	0.000	0.001	0.001	0.021	0.000	0.012	304.666	0.681	NaN	1.603688	0.4079720E-02	-0.4055106
07142011	13	0.003	0.002	0.008	0.000	0.000	0.000	0.000	0.000	0.014	0.000	0.009	305.646	0.651	0.6852150E-03	0.8636103	0.3523958E-03	0.3892870
07142011	14	0.002	0.001	0.005	0.000	0.000	0.000	0.000	0.000	0.009	0.000	0.007	305.746	0.652	0.6133318E-04	0.6027593	0.6083431E-03	-0.4004676E-02
07142011	15	0.002	0.000	0.004	0.000	0.000	0.000	0.000	0.000	0.008	0.000	0.005	305.004	0.675	0.5841255E-04	0.5464481	0.1012879E-02	-0.2680088
07142011	16	0.002	0.001	0.004	0.000	0.000	0.000	0.000	0.000	0.006	0.000	0.004	303.906	0.712	0.5924702E-04	0.4825091	0.8625717E-03	-0.2522897
07142011	17	0.002	0.001	0.003	0.000	0.000	0.000	0.000	0.000	0.005	0.000	0.004	302.994	0.749	0.2686381E-03	0.5291781	0.2981081E-03	0.2492281
07142011	18	0.002	0.001	0.004	0.000	0.000	0.000	0.000	0.000	0.006	0.000	0.004	302.169	0.795	0.1329184E-03	0.6861064	0.7356820E-03	-0.3029867E-01
07142011	19	0.002	0.002	0.005	0.000	0.000	0.000	0.000	0.000	0.007	0.000	0.005	300.974	0.852	0.1544356E-02	1.093082	0.2795101E-03	0.5922552
07142011	20	0.001	0.003	0.006	0.000	0.000	0.000	0.000	0.000	0.009	0.000	0.005	300.034	0.896	0.6581545E-03	1.639344	0.6194850E-03	0.4226394
07142011	21	0.002	0.003	0.006	0.000	0.000	0.000	0.000	0.000	0.009	0.000	0.005	299.486	0.918	0.1076996E-02	2.040816	0.4801630E-03	0.6284152
07142011	22	0.003	0.004	0.006	0.000	0.000	0.000	0.000	0.000	0.009	0.000	0.005	298.796	0.940	0.2786517E-02	2.732240	0.3103058E-03	0.9447290
07142011	23	0.004	0.004	0.006	0.000	0.000	0.000	0.000	0.001	0.010	0.000	0.006	298.214	0.960	NaN	6.182636	0.1288869E-02	0.6809649
07142011	24	0.007	0.005	0.005	0.000	0.000	0.000	0.001	0.001	0.011	0.000	0.007	297.883	0.970	NaN	10.38376	0.4343986E-03	1.378466
07152011	01	0.010	0.006	0.005	0.000	0.001	0.000	0.001	0.002	0.011	0.000	0.008	297.703	0.971	NaN	11.08361	0.2023660E-03	1.738544
07152011	02	0.011	0.006	0.005	0.000	0.001	0.000	0.001	0.003	0.012	0.000	0.010	297.591	0.968	NaN	12.15417	0.2213357E-03	1.739674
07152011	03	0.012	0.007	0.005	0.000	0.001	0.001	0.002	0.004	0.014	0.000	0.012	297.527	0.963	NaN	9.660174	0.1193210E-03	1.908268
07152011	04	0.013	0.007	0.005	0.001	0.002	0.001	0.002	0.004	0.017	0.001	0.014	297.476	0.960	0.7485634E-01	8.257218	0.7054244E-04	2.068383
07152011	05	0.013	0.006	0.004	0.001	0.002	0.001	0.002	0.004	0.020	0.001	0.016	297.441	0.956	0.7969129E-01	9.829207	0.9546073E-04	2.012694
07152011	06	0.014	0.005	0.003	0.001	0.002	0.001	0.003	0.004	0.023	0.001	0.018	297.428	0.952	0.8195990E-01	9.086978	0.8609553E-04	2.023439
07152011	07	0.014	0.004	0.003	0.001	0.003	0.001	0.003	0.004	0.025	0.001	0.019	298.255	0.935	0.7378465E-01	8.075217	0.7771063E-04	2.016674
07152011	08	0.012	0.006	0.006	0.001	0.003	0.001	0.003	0.003	0.029	0.001	0.020	299.512	0.873	0.3521138E-01	4.363475	0.7176078E-04	1.783945
07152011	09	0.004	0.006	0.011	0.000	0.001	0.000	0.001	0.001	0.026	0.000	0.015	300.119	0.844	NaN	3.369221	0.4267341E-02	-0.1026278
07152011	10	0.002	0.002	0.008	0.000	0.001	0.000	0.001	0.001	0.020	0.000	0.011	301.467	0.811	NaN	2.111786	0.2688423E-02	-0.1048476
07152011	11	0.002	0.001	0.006	0.000	0.000	0.000	0.000	0.000	0.015	0.000	0.008	301.020	0.793	0.3764033E-03	1.311476	0.1001145E-02	0.1172633
07152011	12	0.004	0.000	0.005	0.000	0.000	0.000	0.000	0.001	0.014	0.000	0.008	302.296	0.776	NaN	1.295862	0.1398070E-02	-0.3297029E-01
07152011	13	0.002	0.000	0.005	0.000	0.000	0.000	0.000	0.001	0.012	0.000	0.007	303.165	0.741	NaN	0.8826687	0.2500987E-02	-0.4523138
07152011	14	0.002	0.000	0.005	0.000	0.000	0.000	0.000	0.000	0.009	0.000	0.006	302.758	0.747	0.7185936E-03	0.8077297	0.3297591E-03	0.3890693
07152011	15	0.002	0.000	0.004	0.000	0.000	0.000	0.000	0.000	0.008	0.000	0.006	302.106	0.773	0.3315806E-03	0.8506554	0.5486227E-03	0.1904799
07152011	16	0.001	0.001	0.003	0.000	0.000	0.000	0.000	0.000	0.008	0.000	0.007	301.591	0.800	0.1561046E-03	1.155754	0.7833799E-03	0.1688929
07152011	17	0.001	0.001	0.003	0.000	0.000	0.000	0.000	0.000	0.007	0.000	0.007	300.943	0.823	0.1390576E-03	1.313651	0.9657826E-03	0.1336007
07152011	18	0.001	0.001	0.003	0.000	0.000	0.000	0.000	0.000	0.006	0.000	0.007	300.144	0.859	0.1790524E-03	1.711491	0.1493951E-02	0.5903823E-01
07152011	19	0.001	0.001	0.003	0.000	0.000	0.000	0.000	0.000	0.006	0.000	0.008	299.771	0.879	0.2331138E-03	2.368026	0.2411936E-02	-0.7979319E-02
07152011	20	0.001	0.001	0.002	0.000	0.000	0.000	0.000	0.000	0.006	0.000	0.007	298.807	0.909	0.5890727E-03	2.592593	0.1836281E-02	0.1497951
07152011	21	0.001	0.001	0.002	0.000	0.000	0.000	0.000	0.000	0.006	0.000	0.006	298.226	0.945	0.2437055E-02	3.897402	0.1341376E-02	0.4632245
07152011	22	0.001	0.002	0.001	0.000	0.000	0.000	0.000	0.000	0.008	0.000	0.007	297.970	0.958	0.5727351E-02	5.684823	0.1324115E-02	0.6327912
07152011	23	0.001	0.003	0.001	0.000	0.000	0.000	0.000	0.000	0.009	0.000	0.009	297.822	0.960	0.4937232E-02	7.350608	0.2335364E-02	0.4979686
07152011	24	0.001	0.002	0.001	0.000	0.001	0.000	0.000	0.000	0.008	0.000	0.008	297.680	0.967	0.000000	8.914729	0.2698911E-02	0.5189196
07162011	01	0.001	0.001	0.001	0.000	0.001	0.000	0.001	0.000	0.006	0.000	0.006	297.578	0.970	0.1448298E-01	6.711664	0.1846898E-02	0.5603872
07162011	02	0.002	0.001	0.001	0.000	0.001	0.000	0.001	0.000	0.004	0.000	0.003	297.689	0.958	NaN	2.674792	0.2222429E-03	1.080462
07162011	03	0.003	0.000	0.001	0.000	0.001	0.000	0.001	0.000	0.001	0.000	0.002	297.465	0.966	NaN	2.767697	0.1548033E-03	1.252338
07162011	04	0.003	0.000	0.001	0.000	0.001	0.000	0.001	0.000	0.001	0.000	0.001	297.345	0.966	NaN	2.038762	0.2638342E-04	1.888036
07162011	05	0.004	0.000	0.001	0.000	0.001	0.000	0.001	0.000	0.001	0.000	0.002	297.188	0.969	NaN	2.933286	0.9984127E-04	1.468044
07162011	06	0.003	0.001	0.001	0.000	0.001	0.000	0.001	0.000	0.001	0.000	0.002	297.082	0.960	NaN	2.033046	0.1442383E-03	1.149067
07162011	07	0.004	0.001	0.002	0.000	0.001	0.000	0.000	0.000	0.002	0.000	0.002	297.753	0.931	0.1323819E-02	0.9356763	0.8676245E-04	1.032794
07162011	08	0.003	0.000	0.002	0.000	0.000	0.000	0.000	0.000	0.002	0.000	0.002	298.688	0.906	0.3349185E-03	0.7272727	0.2632096E-03	0.4413955
07162011	09	0.002	0.000	0.003	0.000	0.000	0.000	0.000	0.000	0.003	0.000	0.002	299.594	0.882	0.1626015E-03	0.5509642	0.3223169E-03	0.2328403
07162011	10	0.002	0.000	0.002	0.000	0.000	0.000	0.000	0.000	0.002	0.000	0.001	299.786	0.864	0.8231401E-04	0.2386635	0.1304797E-03	0.2622429
07162011	11	0.002	0.000	0.002	0.000	0.000	0.000	0.000	0.000	0.002	0.000	0.001	301.227	0.822	0.4172325E-04	0.1890359	0.1613308E-03	0.6882695E-01
07162011	12	0.002	0.000	0.002	0.000	0.000	0.000	0.000	0.000	0.002	0.000	0.001	301.841	0.809	0.3355742E-04	0.1798561	0.1725964E-03	0.1789340E-01
07162011	13	0.001	0.001	0.002	0.000	0.000	0.000	0.000	0.000	0.003	0.000	0.002	301.870	0.810	0.5584955E-04	0.3597122	0.5138912E-03	-0.1549159
07162011	14	0.001	0.001	0.002	0.000	0.000	0.000	0.000	0.000	0.004	0.000	0.003	302.317	0.810	0.2598166E-03	0.5143043	0.2487711E-03	0.3154202
07162011	15	0.001	0.001	0.002	0.000	0.000	0.000	0.000	0.000	0.004	0.000	0.004	302.002	0.824	0.1029968E-03	0.7367281	0.4689097E-03	0.1962181
07162011	16	0.001	0.001	0.003	0.000	0.000	0.000	0.000	0.000	0.004	0.000	0.004	301.610	0.839	0.1401305E-03	0.8262914	0.5049355E-03	0.2138974
07162011	17	0.001	0.001	0.003	0.000	0.000	0.000	0.000	0.000	0.004	0.000	0.004	301.072	0.858	0.1980662E-03	0.9394480	0.5443781E-03	0.2369721
07162011	18	0.001	0.000	0.003	0.000	0.000	0.000	0.000	0.000	0.004	0.000	0.003	300.447	0.877	0.7808805E-03	0.7990423	0.2377167E-03	0.5265100
07162011	19	0.002	0.000	0.002	0.000	0.000	0.000	0.000	0.000	0.003	0.000	0.002	299.681	0.896	0.2121925E-03	0.6557378	0.3006986E-03	0.3385988
07162011	20	0.002	0.000	0.002	0.000	0.000	0.000	0.000	0.000	0.002	0.000	0.002	298.834	0.905	0.2757907E-03	0.7272727	0.3719556E-03	0.2912062
07162011	21	0.002	0.000	0.002	0.000	0.000	0.000	0.000	0.000	0.002	0.000	0.002	298.221	0.917	0.3250837E-03	0.8163266	0.3616584E-03	0.3535654
07162011	22	0.002	0.000	0.002	0.000	0.000	0.000	0.000	0.000	0.003	0.000	0.002	297.730	0.915	0.4317760E-03	0.8163266	0.2447398E-03	0.5231594
07162011	23	0.003	0.000	0.002	0.000	0.000	0.000	0.000	0.000	0.003	0.000	0.002	297.064	0.930	0.8853078E-03	0.9345794	0.1460052E-03	0.8062478
07162011	24	0.003	0.000	0.002	0.000	0.000	0.000	0.000	0.000	0.003	0.000	0.002	296.489	0.943	0.1271188E-02	1.092896	0.1354994E-03	0.9066415
07172011	01	0.003	0.000	0.003	0.000	0.000	0.000	0.000	0.000	0.004	0.000	0.003	296.048	0.928	0.1237035E-02	1.401869	0.2781764E-03	0.7023873
07172011	02	0.003	0.000	0.002	0.000	0.000	0.000	0.000	0.000	0.005	0.000	0.003	295.572	0.932	0.1926124E-02	1.401869	0.1848312E-03	0.8799321
07172011	03	0.004	0.000	0.002	0.000	0.001	0.000	0.000	0.000	0.004	0.000	0.003	295.509	0.931	0.2990901E-02	1.402966	0.1166202E-03	1.080273
07172011	04	0.004	0.001	0.002	0.000	0.001	0.000	0.001	0.000	0.005	0.000	0.003	295.503	0.934	NaN	2.007618	0.1096903E-03	1.262513
07172011	05	0.004	0.001	0.002	0.000	0.001	0.000	0.000	0.000	0.005	0.000	0.003	295.635	0.925	0.3692150E-02	1.402966	0.9198146E-04	1.183347
07172011	06	0.004	0.001	0.002	0.000	0.001	0.000	0.000	0.000	0.006	0.000	0.004	295.670	0.932	0.3830194E-02	1.870256	0.1585883E-03	1.071630
07172011	07	0.004	0.001	0.003	0.000	0.001	0.000	0.000	0.000	0.006	0.000	0.003	296.276	0.929	0.3917217E-02	1.402966	0.7910287E-04	1.248855
07172011	08	0.004	0.000	0.004	0.000	0.000	0.000	0.000	0.000	0.007	0.000	0.004	297.507	0.891	0.1229107E-02	1.197605	0.2354139E-03	0.7064815
07172011	09	0.003	0.000	0.004	0.000	0.000	0.000	0.000	0.000	0.007	0.000	0.004	297.751	0.866	0.7138252E-03	1.023018	0.3373775E-03	0.4817671
07172011	10	0.004	0.000	0.005	0.000	0.000	0.000	0.000	0.000	0.007	0.000	0.004	299.769	0.797	0.3360510E-03	0.6861064	0.3548024E-03	0.2864050
07172011	11	0.004	0.000	0.005	0.000	0.000	0.000	0.000	0.000	0.007	0.000	0.004	300.103	0.765	0.2564788E-03	0.6024097	0.3847483E-03	0.1947152
07172011	12	0.005	0.000	0.005	0.000	0.000	0.000	0.000	0.000	0.007	0.000	0.004	301.623	0.716	0.1717210E-03	0.4993758	0.3717179E-03	0.1282140
07172011	13	0.004	0.000	0.007	0.000	0.000	0.000	0.000	0.000	0.007	0.000	0.004	302.406	0.686	0.9834766E-04	0.4514673	0.5049819E-03	-0.4864950E-01
07172011	14	0.004	0.000	0.007	0.000	0.000	0.000	0.000	0.000	0.007	0.000	0.004	302.666	0.678	0.8803606E-04	0.4371585	0.5199662E-03	-0.7533623E-01
07172011	15	0.004	0.000	0.007	0.000	0.000	0.000	0.000	0.000	0.006	0.000	0.003	302.252	0.686	0.9143353E-04	0.3386005	0.3156751E-03	0.3044716E-01
07172011	16	0.005	0.000	0.005	0.000	0.000	0.000	0.000	0.000	0.005	0.000	0.003	301.019	0.707	0.1346469E-03	0.3618818	0.2817057E-03	0.1087711
07172011	17	0.005	0.000	0.004	0.000	0.000	0.000	0.000	0.000	0.005	0.000	0.003	301.437	0.708	0.1223087E-03	0.3618818	0.2901356E-03	0.9596568E-01
07172011	18	0.004	0.000	0.004	0.001	0.001	0.000	0.000	0.000	0.005	0.000	0.003	300.549	0.725	0.2029538E-03	0.4053825	0.2275474E-03	0.2507931
07172011	19	0.004	0.001	0.004	0.001	0.001	0.000	0.000	0.001	0.006	0.000	0.004	299.549	0.752	0.5526185E-02	0.4346946	0.1047678E-04	1.617957
07172011	20	0.004	0.001	0.004	0.001	0.001	0.000	0.001	0.001	0.006	0.000	0.005	298.525	0.774	0.7994831E-02	0.6079834	0.1327589E-04	1.660828
07172011	21	0.004	0.001	0.003	0.001	0.001	0.000	0.001	0.001	0.007	0.000	0.006	297.966	0.795	0.1274729E-01	0.8626013	0.1568451E-04	1.740339
07172011	22	0.004	0.001	0.002	0.001	0.001	0.000	0.001	0.001	0.009	0.000	0.006	297.563	0.818	0.1661849E-01	0.9489260	0.1379203E-04	1.837604
07172011	23	0.004	0.001	0.002	0.001	0.001	0.000	0.001	0.001	0.010	0.000	0.007	297.234	0.839	0.2196181E-01	1.268062	0.1776827E-04	1.853495
07172011	24	0.004	0.001	0.002	0.001	0.001	0.000	0.001	0.001	0.011	0.000	0.008	296.890	0.870	0.3003770E-01	1.789425	0.2335346E-04	1.884362
07182011	01	0.005	0.001	0.002	0.001	0.001	0.000	0.001	0.001	0.011	0.000	0.008	296.674	0.886	0.3385013E-01	2.092757	0.2504375E-04	1.922019
07182011	02	0.006	0.001	0.003	0.001	0.001	0.000	0.001	0.001	0.011	0.000	0.008	296.426	0.908	0.3313094E-01	2.539618	0.3278827E-04	1.889050
07182011	03	0.006	0.002	0.003	0.001	0.001	0.000	0.001	0.001	0.011	0.000	0.008	296.288	0.910	0.3336620E-01	2.539618	0.3319227E-04	1.883731
07182011	04	0.007	0.002	0.003	0.001	0.002	0.001	0.001	0.002	0.010	0.000	0.008	296.215	0.899	0.2548218E-01	1.963287	0.2380824E-04	1.916256
07182011	05	0.007	0.003	0.003	0.001	0.002	0.001	0.002	0.002	0.009	0.000	0.009	296.067	0.900	0.2961075E-01	2.280126	0.2686906E-04	1.928706
07182011	06	0.008	0.003	0.003	0.001	0.002	0.001	0.002	0.002	0.008	0.000	0.009	295.961	0.898	0.2977353E-01	2.280126	0.2713123E-04	1.924489
07182011	07	0.008	0.005	0.004	0.001	0.003	0.001	0.002	0.003	0.007	0.001	0.009	296.407	0.884	0.1729143E-01	1.671064	0.2507293E-04	1.823788
07182011	08	0.010	0.011	0.008	0.001	0.003	0.001	0.002	0.002	0.006	0.001	0.008	297.777	0.841	0.1011837E-01	1.316795	0.2564105E-04	1.710582
07182011	09	0.010	0.014	0.011	0.000	0.002	0.000	0.001	0.001	0.005	0.000	0.006	299.494	0.775	NaN	1.463407	0.2056929E-02	-0.1478543
07182011	10	0.010	0.009	0.008	0.000	0.001	0.000	0.001	0.001	0.004	0.000	0.004	301.044	0.714	NaN	0.8114838	0.1987642E-03	0.6109416
07182011	11	0.008	0.005	0.007	0.000	0.001	0.000	0.001	0.001	0.005	0.000	0.004	302.559	0.657	NaN	0.6124316	0.1904127E-03	0.5073617
07182011	12	0.007	0.003	0.006	0.000	0.001	0.000	0.001	0.000	0.007	0.000	0.005	303.816	0.612	NaN	0.6056228	0.7569989E-03	-0.9689303E-01
07182011	13	0.006	0.002	0.006	0.000	0.001	0.000	0.000	0.000	0.010	0.000	0.006	304.995	0.571	0.8118153E-04	0.4899936	0.6089608E-03	-0.9439895E-01
07182011	14	0.006	0.001	0.006	0.000	0.001	0.000	0.000	0.000	0.013	0.000	0.007	305.795	0.534	0.7605553E-04	0.5092393	0.6611372E-03	-0.1133696
07182011	15	0.006	0.001	0.006	0.000	0.001	0.000	0.000	0.000	0.016	0.000	0.009	305.555	0.528	0.9191036E-04	0.6494917	0.9261795E-03	-0.1541215
07182011	16	0.008	0.001	0.006	0.000	0.001	0.000	0.000	0.000	0.017	0.000	0.010	305.372	0.533	0.1236796E-03	0.7196180	0.8825504E-03	-0.8863751E-01
07182011	17	0.009	0.001	0.006	0.000	0.001	0.000	0.000	0.001	0.018	0.000	0.010	304.872	0.544	NaN	0.7959137	0.5967513E-03	0.1250726
07182011	18	0.008	0.001	0.005	0.000	0.001	0.000	0.000	0.001	0.019	0.000	0.011	304.269	0.548	NaN	0.8567855	0.8407920E-03	0.8183510E-02
07182011	19	0.010	0.001	0.005	0.000	0.001	0.000	0.001	0.001	0.017	0.000	0.010	303.561	0.545	NaN	0.7812703	0.3909854E-03	0.3006407
07182011	20	0.014	0.001	0.004	0.000	0.001	0.000	0.001	0.001	0.015	0.000	0.010	301.938	0.591	NaN	0.8625724	0.2679447E-03	0.5077504
07182011	21	0.020	0.001	0.004	0.000	0.001	0.000	0.001	0.002	0.012	0.000	0.010	300.650	0.621	NaN	0.8693787	0.1353060E-03	0.8078920
07182011	22	0.026	0.001	0.004	0.000	0.001	0.001	0.002	0.003	0.009	0.000	0.009	299.623	0.664	NaN	0.8470787	0.2693407E-04	1.497622
07182011	23	0.029	0.002	0.005	0.000	0.001	0.001	0.002	0.004	0.008	0.000	0.010	298.792	0.714	NaN	1.068429	0.2398704E-04	1.648769
07182011	24	0.032	0.002	0.005	0.000	0.001	0.001	0.002	0.004	0.006	0.000	0.010	298.043	0.773	NaN	1.355456	0.2463689E-04	1.740500
07192011	01	0.032	0.003	0.006	0.000	0.001	0.001	0.003	0.005	0.006	0.000	0.010	297.354	0.838	NaN	1.862075	0.1581402E-04	2.070955
07192011	02	0.030	0.003	0.006	0.000	0.002	0.001	0.003	0.005	0.007	0.000	0.011	296.859	0.882	NaN	2.798240	0.2228838E-04	2.098806
07192011	03	0.028	0.004	0.006	0.000	0.002	0.001	0.003	0.005	0.008	0.001	0.012	296.578	0.899	NaN	3.947932	0.3543328E-04	2.046958
07192011	04	0.026	0.004	0.006	0.000	0.002	0.001	0.003	0.006	0.009	0.001	0.013	296.373	0.906	NaN	4.407076	0.3751322E-04	2.069966
07192011	05	0.026	0.004	0.006	0.000	0.002	0.001	0.003	0.006	0.010	0.001	0.013	296.207	0.911	NaN	4.409534	0.3533426E-04	2.096197
07192011	06	0.027	0.005	0.006	0.000	0.002	0.001	0.003	0.006	0.011	0.001	0.014	296.074	0.918	NaN	5.397039	0.4196190E-04	2.109300
07192011	07	0.028	0.005	0.006	0.000	0.002	0.001	0.003	0.006	0.010	0.001	0.014	296.757	0.924	NaN	5.392911	0.4440213E-04	2.084419
07192011	08	0.022	0.004	0.006	0.000	0.002	0.001	0.003	0.006	0.010	0.000	0.014	299.118	0.838	NaN	2.487844	0.5767857E-04	1.634809
07192011	09	0.011	0.015	0.012	0.000	0.002	0.001	0.002	0.004	0.021	0.001	0.017	300.990	0.767	NaN	2.832422	0.1264756E-02	0.3501512
07192011	10	0.005	0.052	0.016	0.000	0.002	0.001	0.001	0.003	0.028	0.000	0.019	302.824	0.678	NaN	2.108418	0.6897393E-02	-0.5147283
07192011	11	0.003	0.103	0.023	0.000	0.001	0.000	0.001	0.002	0.030	0.000	0.021	304.104	0.620	0.7818341E-03	1.630706	0.4432007E-02	-0.4342247
07192011	12	0.002	0.086	0.020	0.000	0.001	0.000	0.001	0.001	0.029	0.000	0.021	305.167	0.576	0.1396537E-03	1.388924	0.4278209E-02	-0.4885834
07192011	13	0.002	0.060	0.017	0.000	0.001	0.000	0.001	0.001	0.028	0.000	0.020	306.473	0.536	0.1097322E-03	1.172936	0.4260302E-02	-0.5601659
07192011	14	0.001	0.035	0.013	0.000	0.001	0.000	0.000	0.001	0.022	0.000	0.021	307.162	0.520	0.1442432E-04	1.133382	0.1238824E-02	-0.3863354E-01
07192011	15	0.000	0.018	0.011	0.000	0.000	0.000	0.000	0.001	0.018	0.000	0.023	306.993	0.534	0.7748604E-06	1.618852	0.4409959E-02	-0.4352275
07192011	16	0.000	0.011	0.010	0.000	0.000	0.000	0.000	0.001	0.016	0.000	0.024	306.496	0.561	0.1311302E-05	2.079154	0.7535606E-02	-0.5592316
07192011	17	0.000	0.009	0.009	0.000	0.000	0.000	0.000	0.001	0.016	0.000	0.024	305.752	0.591	0.2324581E-05	2.266224	0.7656495E-02	-0.5287271
07192011	18	0.000	0.009	0.007	0.000	0.000	0.000	0.000	0.001	0.018	0.000	0.023	304.880	0.624	0.4529953E-05	2.146582	0.4836138E-02	-0.3527513
07192011	19	0.000	0.008	0.005	0.000	0.000	0.000	0.000	0.001	0.019	0.000	0.021	303.909	0.658	0.1430511E-04	2.003597	0.2567109E-02	-0.1076340
07192011	20	0.001	0.006	0.004	0.000	0.000	0.000	0.001	0.001	0.023	0.000	0.021	302.283	0.718	0.1596808E-03	2.317203	0.2624995E-02	-0.5416443E-01
07192011	21	0.002	0.005	0.003	0.001	0.000	0.000	0.001	0.001	0.027	0.000	0.021	301.056	0.760	0.000000	2.626580	0.3779774E-02	-0.1580751
07192011	22	0.002	0.004	0.002	0.001	0.000	0.000	0.001	0.002	0.030	0.000	0.022	300.184	0.792	0.000000	3.087668	0.4036504E-02	-0.1163748
07192011	23	0.003	0.003	0.002	0.001	0.001	0.000	0.001	0.002	0.031	0.000	0.021	299.487	0.822	0.000000	3.543510	0.3686198E-02	-0.1714497E-01
07192011	24	0.003	0.003	0.002	0.001	0.001	0.000	0.001	0.002	0.030	0.000	0.021	298.927	0.851	0.000000	4.175477	0.3542542E-02	0.7139111E-01
07202011	01	0.003	0.003	0.002	0.001	0.001	0.000	0.001	0.002	0.029	0.000	0.020	298.484	0.876	0.000000	4.902143	0.3387110E-02	0.1605566
07202011	02	0.003	0.002	0.001	0.001	0.001	0.000	0.001	0.002	0.028	0.000	0.019	298.084	0.899	0.000000	5.538717	0.3246797E-02	0.2319541
07202011	03	0.003	0.002	0.001	0.001	0.001	0.000	0.001	0.002	0.026	0.000	0.017	297.833	0.909	0.000000	6.175982	0.3157411E-02	0.2913749
07202011	04	0.003	0.001	0.001	0.001	0.002	0.000	0.001	0.001	0.024	0.000	0.015	297.641	0.915	0.1006079	5.711531	0.3969559E-04	2.158010
07202011	05	0.004	0.001	0.001	0.001	0.002	0.000	0.001	0.002	0.023	0.000	0.014	297.493	0.919	0.8735222E-01	4.895205	0.3446808E-04	2.152354
07202011	06	0.006	0.001	0.001	0.001	0.003	0.000	0.001	0.002	0.020	0.000	0.014	297.393	0.923	0.8748758E-01	4.898592	0.3484597E-04	2.147919
07202011	07	0.009	0.001	0.001	0.001	0.004	0.001	0.001	0.002	0.019	0.000	0.014	298.153	0.909	0.7643920E-01	4.350876	0.2973890E-04	2.165252
07202011	08	0.009	0.002	0.001	0.002	0.004	0.001	0.002	0.003	0.018	0.000	0.015	299.953	0.861	0.4635137E-01	2.912227	0.2285425E-04	2.105258
07202011	09	0.020	0.006	0.005	0.001	0.003	0.000	0.001	0.002	0.019	0.000	0.014	301.229	0.827	0.2284199E-01	2.422213	0.3937034E-04	1.789043
07202011	10	0.021	0.008	0.006	0.000	0.001	0.000	0.001	0.002	0.020	0.000	0.013	302.389	0.793	NaN	2.313001	0.1938084E-03	1.076803
07202011	11	0.013	0.007	0.006	0.000	0.001	0.000	0.000	0.001	0.021	0.000	0.012	303.502	0.760	NaN	1.980651	0.4556341E-03	0.6381918
07202011	12	0.005	0.002	0.006	0.000	0.000	0.000	0.000	0.001	0.020	0.000	0.011	303.004	0.774	NaN	1.726334	0.1610259E-02	0.3022900E-01
07202011	13	0.003	0.000	0.005	0.000	0.000	0.000	0.000	0.000	0.016	0.000	0.010	303.939	0.747	0.2077281E-02	1.364833	0.3317450E-03	0.6142751
07202011	14	0.002	0.000	0.005	0.000	0.000	0.000	0.000	0.000	0.013	0.000	0.009	304.619	0.723	0.2619624E-03	1.036783	0.7572881E-03	0.1364269
07202011	15	0.002	0.000	0.004	0.000	0.000	0.000	0.000	0.000	0.011	0.000	0.008	304.595	0.715	0.1897216E-03	0.9119395	0.7052504E-03	0.1116227
07202011	16	0.002	0.000	0.003	0.000	0.000	0.000	0.000	0.000	0.009	0.000	0.006	302.969	0.739	0.6529689E-03	0.7772974	0.3311653E-03	0.3705424
07202011	17	0.002	0.000	0.003	0.000	0.000	0.000	0.000	0.000	0.008	0.000	0.006	303.126	0.769	0.3148913E-03	0.8506554	0.5121828E-03	0.2203287
07202011	18	0.002	0.000	0.002	0.000	0.000	0.000	0.000	0.000	0.008	0.000	0.006	302.067	0.794	0.4160404E-03	0.9320985	0.5264270E-03	0.2481236
07202011	19	0.002	0.000	0.002	0.000	0.000	0.000	0.000	0.000	0.008	0.000	0.006	301.458	0.817	0.6139278E-03	1.082297	0.5125027E-03	0.3246503
07202011	20	0.002	0.000	0.002	0.000	0.000	0.000	0.000	0.000	0.008	0.000	0.006	300.310	0.840	0.8531213E-03	1.212455	0.5219987E-03	0.3659962
07202011	21	0.002	0.000	0.001	0.000	0.000	0.000	0.000	0.000	0.011	0.000	0.006	299.562	0.861	0.5912185E-03	1.431981	0.6706723E-03	0.3294268
07202011	22	0.005	0.000	0.001	0.000	0.000	0.000	0.000	0.000	0.011	0.000	0.006	299.100	0.870	0.1388788E-02	1.534527	0.3201900E-03	0.6805668
07202011	23	0.007	0.000	0.001	0.000	0.000	0.000	0.000	0.000	0.011	0.000	0.006	298.874	0.876	0.2617419E-02	1.652892	0.2085676E-03	0.8989978
07202011	24	0.007	0.000	0.001	0.000	0.000	0.000	0.000	0.000	0.011	0.000	0.006	298.694	0.885	0.2946436E-02	1.796407	0.2016193E-03	0.9498727
07212011	01	0.006	0.000	0.001	0.000	0.000	0.000	0.000	0.000	0.011	0.000	0.006	298.475	0.897	0.2890706E-02	1.967213	0.2271347E-03	0.9375679
07212011	02	0.005	0.000	0.001	0.000	0.000	0.000	0.000	0.000	0.011	0.000	0.006	298.233	0.906	0.2838910E-02	2.181818	0.2605123E-03	0.9229904
07212011	03	0.005	0.000	0.001	0.000	0.000	0.000	0.000	0.000	0.011	0.000	0.006	297.953	0.916	0.3494442E-02	2.448980	0.2460886E-03	0.9978937
07212011	04	0.005	0.000	0.002	0.000	0.000	0.000	0.000	0.000	0.011	0.000	0.006	297.725	0.923	0.3647327E-02	2.448980	0.2417213E-03	1.005670
07212011	05	0.005	0.001	0.002	0.000	0.000	0.000	0.000	0.000	0.011	0.000	0.006	297.578	0.929	0.4584014E-02	2.803738	0.2289429E-03	1.088010
07212011	06	0.006	0.001	0.002	0.000	0.000	0.000	0.000	0.000	0.011	0.000	0.006	297.506	0.932	0.5490720E-02	2.803738	0.1908616E-03	1.167019
07212011	07	0.008	0.002	0.002	0.000	0.000	0.000	0.001	0.000	0.011	0.000	0.006	297.698	0.936	NaN	3.903309	0.1549072E-03	1.401361
07212011	08	0.003	0.003	0.003	0.000	0.000	0.000	0.000	0.000	0.011	0.000	0.006	299.518	0.885	0.1079440E-02	1.796407	0.4691526E-03	0.5830907
07212011	09	0.001	0.008	0.006	0.000	0.000	0.000	0.000	0.000	0.009	0.000	0.011	300.404	0.871	0.2692342E-03	2.986805	0.2960742E-02	0.3806207E-02
07212011	10	0.000	0.005	0.007	0.000	0.000	0.000	0.000	0.000	0.010	0.000	0.013	301.442	0.835	0.1236200E-03	3.101545	0.4500114E-02	-0.1616455
07212011	11	0.000	0.004	0.007	0.000	0.000	0.000	0.000	0.000	0.010	0.000	0.013	302.698	0.781	0.3999472E-04	2.324803	0.4061657E-02	-0.2423171
07212011	12	0.000	0.002	0.007	0.000	0.000	0.000	0.000	0.000	0.009	0.000	0.013	303.548	0.741	0.1710653E-04	2.072291	0.4764533E-02	-0.3615696
07212011	13	0.000	0.001	0.005	0.000	0.000	0.000	0.000	0.000	0.007	0.000	0.010	303.611	0.722	0.9655952E-05	1.477130	0.3530275E-02	-0.3783900
07212011	14	0.000	0.000	0.003	0.000	0.000	0.000	0.000	0.000	0.006	0.000	0.008	303.777	0.715	0.8225441E-05	1.146566	0.2436060E-02	-0.3272890
07212011	15	0.000	0.000	0.003	0.000	0.000	0.000	0.000	0.000	0.005	0.000	0.007	303.658	0.718	0.6794930E-05	1.025206	0.2373479E-02	-0.3645741
07212011	16	0.000	0.000	0.002	0.000	0.000	0.000	0.000	0.000	0.004	0.000	0.006	303.643	0.719	0.5543232E-05	0.9038469	0.2312866E-02	-0.4080556
07212011	17	0.000	0.000	0.002	0.000	0.000	0.000	0.000	0.000	0.003	0.000	0.005	303.447	0.716	0.4351139E-05	0.7824877	0.2258951E-02	-0.4604293
07212011	18	0.000	0.000	0.001	0.000	0.000	0.000	0.000	0.000	0.003	0.000	0.005	303.143	0.710	0.3755093E-05	0.7569823	0.2251355E-02	-0.4733583
07212011	19	0.001	0.000	0.001	0.000	0.000	0.000	0.000	0.000	0.004	0.000	0.004	302.046	0.742	0.3832579E-04	0.5042369	0.3629261E-03	0.1428164
07212011	20	0.001	0.000	0.001	0.000	0.000	0.000	0.000	0.000	0.005	0.000	0.004	300.749	0.783	0.1289248E-03	0.5747127	0.4622946E-03	0.9453201E-01
07212011	21	0.001	0.000	0.001	0.000	0.000	0.000	0.000	0.000	0.005	0.000	0.004	299.964	0.800	0.1733899E-03	0.6349207	0.4755872E-03	0.1254893
07212011	22	0.001	0.000	0.001	0.000	0.000	0.000	0.000	0.000	0.005	0.000	0.004	299.323	0.829	0.2694130E-03	0.7462687	0.4753461E-03	0.1958853
07212011	23	0.001	0.000	0.001	0.000	0.000	0.000	0.000	0.000	0.004	0.000	0.004	298.719	0.880	0.3384948E-03	1.088532	0.6450308E-03	0.2272607
07212011	24	0.001	0.000	0.001	0.000	0.000	0.000	0.000	0.000	0.003	0.000	0.004	298.320	0.911	0.3362298E-03	1.481482	0.1048772E-02	0.1500150
07222011	01	0.002	0.001	0.001	0.000	0.000	0.000	0.000	0.000	0.008	0.000	0.006	297.944	0.938	0.7281721E-02	3.198159	0.4681064E-03	0.8345556
07222011	02	0.014	0.003	0.001	0.000	0.001	0.000	0.002	0.000	0.011	0.000	0.007	297.655	0.957	NaN	6.370435	0.7092403E-04	1.953376
07222011	03	0.022	0.004	0.001	0.000	0.002	0.000	0.003	0.000	0.009	0.000	0.007	297.596	0.948	NaN	5.084634	0.3550076E-04	2.156022
07222011	04	0.021	0.004	0.001	0.000	0.002	0.000	0.004	0.001	0.008	0.000	0.008	297.288	0.967	NaN	8.887007	0.3448760E-04	2.411093
07222011	05	0.021	0.005	0.001	0.001	0.003	0.000	0.004	0.001	0.006	0.000	0.008	297.052	0.982	0.2715153	13.06779	0.3131258E-04	2.620483
07222011	06	0.022	0.006	0.001	0.001	0.003	0.000	0.005	0.001	0.005	0.000	0.008	296.875	0.982	0.3189314	13.22641	0.2578476E-04	2.710079
07222011	07	0.022	0.008	0.002	0.001	0.003	0.000	0.005	0.002	0.003	0.000	0.007	297.508	0.962	0.1524220	4.455455	0.7462921E-05	2.775983
07222011	08	0.021	0.012	0.006	0.001	0.003	0.000	0.004	0.002	0.002	0.001	0.007	298.745	0.940	0.4677999E-01	2.841252	0.1244751E-04	2.358427
07222011	09	0.018	0.028	0.024	0.001	0.003	0.000	0.003	0.002	0.003	0.001	0.006	300.377	0.870	0.8226812E-02	1.048460	0.1126674E-04	1.968754
07222011	10	0.009	0.033	0.033	0.000	0.002	0.000	0.002	0.002	0.008	0.001	0.008	301.955	0.779	NaN	1.737899	0.2334312E-01	-1.128134
07222011	11	0.002	0.023	0.025	0.000	0.001	0.000	0.001	0.001	0.013	0.000	0.008	303.329	0.714	NaN	1.024723	0.2105692E-01	-1.312789
07222011	12	0.001	0.012	0.018	0.000	0.001	0.000	0.001	0.001	0.014	0.000	0.008	304.510	0.659	NaN	0.8553902	0.1377715E-01	-1.206995
07222011	13	0.003	0.006	0.013	0.000	0.000	0.000	0.001	0.000	0.013	0.000	0.007	305.518	0.611	NaN	0.7023830	0.8636227E-02	-1.089750
07222011	14	0.006	0.004	0.009	0.000	0.000	0.000	0.001	0.000	0.010	0.000	0.006	305.778	0.600	NaN	0.6508349	0.2997308E-02	-0.6632605
07222011	15	0.008	0.002	0.006	0.000	0.000	0.000	0.001	0.000	0.008	0.000	0.005	304.792	0.623	NaN	0.6186363	0.5503165E-03	0.5082281E-01
07222011	16	0.011	0.001	0.004	0.000	0.000	0.000	0.001	0.000	0.006	0.000	0.004	303.945	0.677	NaN	0.6049513	0.1454214E-03	0.6190921
07222011	17	0.013	0.001	0.004	0.000	0.000	0.000	0.001	0.000	0.006	0.000	0.004	303.023	0.715	NaN	0.7159177	0.1085974E-03	0.8190437
07222011	18	0.014	0.001	0.003	0.000	0.000	0.000	0.001	0.000	0.005	0.000	0.004	302.315	0.765	NaN	0.8126341	0.1006361E-03	0.9071411
07222011	19	0.012	0.001	0.003	0.000	0.000	0.000	0.001	0.000	0.004	0.000	0.003	301.120	0.826	NaN	0.9253319	0.7627779E-04	1.083899
07222011	20	0.012	0.001	0.002	0.000	0.000	0.000	0.001	0.000	0.003	0.000	0.003	299.927	0.881	NaN	1.153518	0.7041710E-04	1.214346
07222011	21	0.015	0.002	0.002	0.000	0.001	0.000	0.002	0.001	0.001	0.000	0.003	299.264	0.900	NaN	1.113526	0.1476391E-04	1.877499
07222011	22	0.016	0.002	0.001	0.000	0.001	0.000	0.002	0.001	0.001	0.000	0.003	298.833	0.908	NaN	0.9779339	0.8283150E-05	2.072114
07222011	23	0.017	0.002	0.001	0.000	0.001	0.000	0.003	0.001	0.001	0.000	0.003	298.498	0.918	NaN	1.106014	0.3235310E-05	2.533844
07222011	24	0.017	0.002	0.001	0.000	0.001	0.000	0.003	0.001	0.001	0.000	0.004	298.167	0.937	NaN	2.041023	0.1344803E-04	2.181189
07232011	01	0.016	0.002	0.001	0.000	0.002	0.000	0.003	0.001	0.002	0.000	0.004	297.777	0.961	NaN	3.190557	0.9143606E-05	2.542749
07232011	02	0.009	0.001	0.001	0.000	0.002	0.000	0.003	0.001	0.005	0.000	0.005	297.546	0.965	NaN	5.455769	0.3094495E-04	2.246266
07232011	03	0.006	0.001	0.001	0.000	0.001	0.000	0.002	0.001	0.007	0.000	0.006	297.573	0.951	NaN	3.601712	0.1105834E-03	1.512819
07232011	04	0.003	0.002	0.002	0.000	0.001	0.000	0.001	0.001	0.008	0.000	0.006	297.410	0.963	NaN	4.741508	0.3577360E-03	1.122354
07232011	05	0.002	0.003	0.003	0.000	0.001	0.000	0.001	0.001	0.008	0.000	0.006	297.205	0.974	NaN	6.517929	0.7551492E-03	0.9360768
07232011	06	0.001	0.003	0.004	0.000	0.001	0.000	0.001	0.000	0.006	0.000	0.007	297.139	0.975	0.1922470E-01	12.03106	0.2438638E-02	0.6931565
07232011	07	0.001	0.003	0.005	0.000	0.001	0.000	0.000	0.000	0.005	0.000	0.007	297.868	0.952	0.000000	4.641813	0.2698593E-02	0.2355502
07232011	08	0.000	0.007	0.013	0.000	0.000	0.000	0.000	0.000	0.004	0.000	0.009	298.941	0.920	0.3672838E-03	4.326689	0.6117574E-02	-0.1504236
07232011	09	0.000	0.010	0.022	0.000	0.000	0.000	0.000	0.000	0.003	0.000	0.009	299.898	0.878	0.1099110E-03	3.191207	0.6831647E-02	-0.3305704
07232011	10	0.000	0.006	0.019	0.000	0.000	0.000	0.000	0.000	0.004	0.000	0.009	299.936	0.855	0.8517504E-04	2.720155	0.5842051E-02	-0.3319717
07232011	11	0.000	0.004	0.018	0.000	0.000	0.000	0.000	0.000	0.004	0.000	0.010	301.557	0.809	0.3385544E-04	2.401236	0.6734514E-02	-0.4478714
07232011	12	0.000	0.002	0.017	0.000	0.000	0.000	0.000	0.000	0.004	0.000	0.009	301.822	0.777	0.1949072E-04	1.879921	0.5608166E-02	-0.4746812
07232011	13	0.000	0.001	0.015	0.000	0.000	0.000	0.000	0.000	0.004	0.000	0.009	302.917	0.752	0.1132488E-04	1.689916	0.5527655E-02	-0.5146757
07232011	14	0.000	0.000	0.013	0.000	0.000	0.000	0.000	0.000	0.003	0.000	0.007	302.307	0.749	0.9238720E-05	1.324385	0.4422209E-02	-0.5236250
07232011	15	0.000	0.000	0.010	0.000	0.000	0.000	0.000	0.000	0.004	0.000	0.007	302.819	0.753	0.9953976E-05	1.234336	0.3421710E-02	-0.4428100
07232011	16	0.000	0.000	0.009	0.000	0.000	0.000	0.000	0.000	0.003	0.000	0.006	301.788	0.779	0.1364946E-04	1.222441	0.3413273E-02	-0.4459431
07232011	17	0.000	0.000	0.006	0.000	0.000	0.000	0.000	0.000	0.003	0.000	0.005	301.393	0.796	0.1823902E-04	1.057026	0.2398803E-02	-0.3559088
07232011	18	0.000	0.000	0.004	0.000	0.000	0.000	0.000	0.000	0.003	0.000	0.004	300.595	0.828	0.3290176E-04	0.9118710	0.1443114E-02	-0.1993673
07232011	19	0.001	0.000	0.003	0.000	0.000	0.000	0.000	0.000	0.003	0.000	0.003	300.097	0.854	0.1666546E-03	0.6507739	0.3863414E-03	0.2264588
07232011	20	0.001	0.000	0.002	0.000	0.000	0.000	0.000	0.000	0.003	0.000	0.003	299.308	0.877	0.2911687E-03	0.8060461	0.4143549E-03	0.2889874
07232011	21	0.001	0.000	0.002	0.000	0.000	0.000	0.000	0.000	0.003	0.000	0.003	298.852	0.892	0.3810525E-03	0.8772390	0.4408352E-03	0.2988417
07232011	22	0.001	0.000	0.001	0.000	0.000	0.000	0.000	0.000	0.003	0.000	0.002	298.493	0.905	0.2753139E-03	0.7272727	0.3721624E-03	0.2909649
07232011	23	0.001	0.000	0.001	0.000	0.000	0.000	0.000	0.000	0.003	0.000	0.002	298.258	0.910	0.2749562E-03	0.7272727	0.3723554E-03	0.2907397
07232011	24	0.001	0.000	0.001	0.000	0.000	0.000	0.000	0.000	0.003	0.000	0.003	298.011	0.915	0.7432699E-03	1.194473	0.4563892E-03	0.4178411
07242011	01	0.001	0.000	0.001	0.000	0.000	0.000	0.000	0.000	0.004	0.000	0.003	297.770	0.923	0.2124012E-02	1.189413	0.2410091E-03	0.6932994
07242011	02	0.001	0.000	0.001	0.000	0.000	0.000	0.000	0.000	0.004	0.000	0.003	297.531	0.932	0.2796948E-02	1.360147	0.2384128E-03	0.7562562
07242011	03	0.001	0.000	0.001	0.000	0.001	0.000	0.000	0.000	0.005	0.000	0.004	297.355	0.938	0.000000	2.145528	0.1356352E-02	0.1991618
07242011	04	0.002	0.000	0.002	0.000	0.001	0.000	0.000	0.000	0.006	0.000	0.004	297.212	0.945	0.2735317E-02	2.646828	0.2960908E-03	0.9513009
07242011	05	0.002	0.001	0.002	0.000	0.001	0.000	0.000	0.000	0.007	0.000	0.005	297.073	0.952	0.2726436E-02	3.309080	0.4851287E-03	0.8338503
07242011	06	0.002	0.001	0.002	0.000	0.001	0.000	0.001	0.000	0.009	0.000	0.005	296.980	0.960	NaN	4.766695	0.3511837E-03	1.132683
07242011	07	0.003	0.002	0.002	0.000	0.001	0.000	0.001	0.000	0.009	0.000	0.006	297.553	0.955	NaN	5.173048	0.5435597E-03	0.9784994
07242011	08	0.001	0.008	0.008	0.000	0.001	0.000	0.000	0.000	0.008	0.000	0.006	298.937	0.896	0.000000	1.912452	0.1780203E-02	0.3112095E-01
07242011	09	0.001	0.011	0.013	0.000	0.001	0.000	0.000	0.000	0.006	0.000	0.007	299.965	0.852	0.000000	1.594240	0.1859205E-02	-0.6677350E-01
07242011	10	0.000	0.006	0.013	0.000	0.000	0.000	0.000	0.000	0.006	0.000	0.008	301.008	0.822	0.5340576E-04	1.733556	0.2832792E-02	-0.2132767
07242011	11	0.000	0.002	0.010	0.000	0.000	0.000	0.000	0.000	0.006	0.000	0.008	301.837	0.784	0.2545118E-04	1.444882	0.2661252E-02	-0.2652537
07242011	12	0.001	0.001	0.007	0.000	0.000	0.000	0.000	0.000	0.006	0.000	0.007	302.700	0.757	0.3039837E-04	1.007194	0.9279768E-03	0.3557615E-01
07242011	13	0.001	0.000	0.005	0.000	0.000	0.000	0.000	0.000	0.006	0.000	0.006	303.307	0.734	0.3671646E-04	0.7361038	0.4769528E-03	0.1884636
07242011	14	0.001	0.000	0.004	0.000	0.000	0.000	0.000	0.000	0.005	0.000	0.006	303.364	0.734	0.1609325E-04	0.7585335	0.6714392E-03	0.5296812E-01
07242011	15	0.001	0.000	0.003	0.000	0.000	0.000	0.000	0.000	0.005	0.000	0.006	303.088	0.739	0.1901388E-04	0.7915568	0.7129573E-03	0.4541856E-01
07242011	16	0.000	0.000	0.003	0.000	0.000	0.000	0.000	0.000	0.005	0.000	0.006	303.014	0.732	0.9119511E-05	0.8471650	0.1401734E-02	-0.2186976
07242011	17	0.000	0.000	0.003	0.000	0.000	0.000	0.000	0.000	0.005	0.000	0.005	302.569	0.729	0.1418591E-04	0.6321113	0.5744260E-03	0.4155942E-01
07242011	18	0.001	0.000	0.002	0.000	0.000	0.000	0.000	0.000	0.005	0.000	0.005	301.936	0.756	0.5203485E-04	0.6941218	0.4914043E-03	0.1499967
07242011	19	0.002	0.000	0.001	0.000	0.000	0.000	0.000	0.000	0.007	0.000	0.005	301.431	0.768	0.6174445E-03	0.7265325	0.3275186E-03	0.3460191
07242011	20	0.001	0.000	0.001	0.000	0.000	0.000	0.000	0.000	0.008	0.000	0.004	300.305	0.775	0.1477003E-03	0.6279435	0.6675945E-03	-0.2659223E-01
07242011	21	0.002	0.000	0.001	0.000	0.000	0.000	0.000	0.000	0.008	0.000	0.004	299.259	0.831	0.3616214E-03	0.7968128	0.4166136E-03	0.2816229
07242011	22	0.001	0.000	0.001	0.000	0.000	0.000	0.000	0.000	0.007	0.000	0.004	298.663	0.866	0.4503727E-03	1.023018	0.5759786E-03	0.2494769
07242011	23	0.002	0.000	0.001	0.000	0.000	0.000	0.000	0.000	0.007	0.000	0.004	298.353	0.883	0.5467534E-03	1.101928	0.4625031E-03	0.3770387
07242011	24	0.004	0.000	0.001	0.000	0.000	0.000	0.000	0.000	0.008	0.000	0.004	298.150	0.885	0.1349151E-02	1.197605	0.1982208E-03	0.7811643
07252011	01	0.005	0.000	0.001	0.000	0.000	0.000	0.000	0.000	0.008	0.000	0.004	297.754	0.920	0.2759337E-02	1.632653	0.1407853E-03	1.064337
07252011	02	0.006	0.000	0.001	0.000	0.001	0.000	0.000	0.000	0.008	0.000	0.005	297.469	0.941	0.6214857E-02	2.732240	0.1420352E-03	1.284123
07252011	03	0.007	0.000	0.001	0.000	0.001	0.000	0.000	0.000	0.008	0.000	0.005	297.251	0.956	0.1453745E-01	4.201680	0.1137403E-03	1.567509
07252011	04	0.008	0.000	0.001	0.000	0.001	0.000	0.000	0.000	0.009	0.000	0.006	297.097	0.962	0.1786643E-01	5.042017	0.1352033E-03	1.571617
07252011	05	0.009	0.001	0.001	0.001	0.002	0.000	0.001	0.001	0.010	0.000	0.007	297.006	0.961	0.7504141E-01	5.038515	0.2831289E-04	2.250318
07252011	06	0.011	0.001	0.001	0.001	0.002	0.000	0.001	0.001	0.010	0.000	0.007	296.947	0.958	0.7547075E-01	5.038515	0.2874228E-04	2.243781
07252011	07	0.013	0.001	0.001	0.001	0.003	0.000	0.001	0.001	0.011	0.000	0.009	297.642	0.932	0.6364775E-01	3.733188	0.2440455E-04	2.184609
07252011	08	0.012	0.003	0.003	0.001	0.003	0.000	0.001	0.002	0.012	0.000	0.010	298.993	0.894	0.3001583E-01	2.409212	0.3080229E-04	1.893292
07252011	09	0.005	0.008	0.009	0.000	0.001	0.000	0.001	0.001	0.014	0.000	0.009	299.780	0.871	NaN	2.768871	0.2408700E-02	0.6052002E-01
07252011	10	0.002	0.003	0.008	0.000	0.000	0.000	0.000	0.001	0.013	0.000	0.010	300.192	0.858	0.1699090E-02	2.067342	0.2517303E-02	-0.8552317E-01
07252011	11	0.001	0.001	0.008	0.000	0.000	0.000	0.000	0.000	0.010	0.000	0.009	301.449	0.824	0.2201796E-03	1.665764	0.1112030E-02	0.1754970
07252011	12	0.001	0.001	0.008	0.000	0.000	0.000	0.000	0.000	0.009	0.000	0.008	302.050	0.775	0.1220703E-03	1.204634	0.8314412E-03	0.1610236
07252011	13	0.001	0.001	0.008	0.000	0.000	0.000	0.000	0.000	0.009	0.000	0.008	302.705	0.744	0.7426739E-04	1.008474	0.6947708E-03	0.1618230
07252011	14	0.001	0.001	0.007	0.000	0.000	0.000	0.000	0.000	0.009	0.000	0.008	303.547	0.726	0.6407499E-04	0.9665185	0.6314853E-03	0.1848469
07252011	15	0.001	0.001	0.007	0.000	0.000	0.000	0.000	0.000	0.009	0.000	0.007	303.156	0.717	0.8296967E-04	0.7836109	0.6614522E-03	0.7360199E-01
07252011	16	0.001	0.001	0.006	0.000	0.000	0.000	0.000	0.000	0.009	0.000	0.008	303.568	0.721	0.5739927E-04	0.9269381	0.6051482E-03	0.1851890
07252011	17	0.001	0.002	0.006	0.000	0.000	0.000	0.000	0.000	0.008	0.000	0.007	303.189	0.727	0.6324053E-04	0.8400962	0.5796594E-03	0.1611562
07252011	18	0.001	0.002	0.004	0.000	0.000	0.000	0.000	0.000	0.009	0.000	0.008	302.858	0.730	0.6598234E-04	0.9665185	0.6613702E-03	0.1647656
07252011	19	0.001	0.002	0.004	0.000	0.000	0.000	0.000	0.000	0.010	0.000	0.009	302.153	0.743	0.7861853E-04	1.140400	0.8027521E-03	0.1524757
07252011	20	0.002	0.002	0.002	0.000	0.000	0.000	0.000	0.000	0.012	0.000	0.010	300.912	0.783	0.2422929E-03	1.464386	0.1137283E-02	0.1097868
07252011	21	0.002	0.001	0.001	0.001	0.000	0.000	0.000	0.000	0.014	0.000	0.009	300.000	0.809	0.000000	1.568177	0.2518043E-02	-0.2056681
07252011	22	0.003	0.001	0.001	0.001	0.000	0.000	0.000	0.000	0.013	0.000	0.008	299.352	0.829	0.5488396E-03	1.593626	0.1084000E-02	0.1673569
07252011	23	0.002	0.001	0.001	0.001	0.000	0.000	0.000	0.000	0.013	0.000	0.008	298.828	0.848	0.000000	1.764223	0.2194776E-02	-0.9483664E-01
07252011	24	0.002	0.001	0.001	0.001	0.000	0.000	0.000	0.000	0.014	0.000	0.007	298.278	0.876	0.1513064E-02	1.928375	0.5022184E-03	0.5842988
07262011	01	0.004	0.001	0.001	0.000	0.000	0.000	0.000	0.000	0.013	0.000	0.007	297.804	0.901	0.2580047E-02	2.295082	0.3644969E-03	0.7991044
07262011	02	0.006	0.001	0.001	0.000	0.000	0.000	0.000	0.000	0.013	0.000	0.007	297.546	0.905	0.4477203E-02	2.545455	0.2378662E-03	1.029433
07262011	03	0.006	0.001	0.001	0.000	0.000	0.000	0.001	0.000	0.012	0.000	0.007	297.296	0.923	NaN	2.901078	0.2434822E-03	1.076092
07262011	04	0.004	0.001	0.001	0.000	0.000	0.000	0.000	0.000	0.011	0.000	0.006	297.174	0.932	0.4088342E-02	2.803738	0.2713733E-03	1.014170
07262011	05	0.002	0.000	0.001	0.000	0.000	0.000	0.000	0.000	0.011	0.000	0.006	297.130	0.934	0.2570808E-02	2.803738	0.4492411E-03	0.7952580
07262011	06	0.001	0.000	0.001	0.000	0.000	0.000	0.000	0.000	0.009	0.000	0.005	297.125	0.937	0.2165139E-02	2.732240	0.4923517E-03	0.7442434
07262011	07	0.001	0.000	0.001	0.000	0.000	0.000	0.000	0.000	0.009	0.000	0.005	297.784	0.936	0.1967311E-02	2.732240	0.5063083E-03	0.7321038
07262011	08	0.002	0.000	0.001	0.000	0.000	0.000	0.000	0.001	0.009	0.000	0.007	299.267	0.890	0.4840851E-02	1.769033	0.1972651E-02	-0.4731415E-01
07262011	09	0.002	0.000	0.002	0.000	0.001	0.000	0.000	0.001	0.009	0.000	0.007	300.413	0.865	0.2394289E-01	1.545539	0.2038001E-02	-0.1201246
07262011	10	0.002	0.002	0.004	0.000	0.000	0.000	0.000	0.001	0.007	0.000	0.005	301.407	0.838	NaN	0.9015188	0.2306473E-02	-0.4079736
07262011	11	0.002	0.001	0.005	0.000	0.000	0.000	0.000	0.000	0.006	0.000	0.004	302.171	0.795	0.1329184E-03	0.6861064	0.7357503E-03	-0.3033898E-01
07262011	12	0.001	0.001	0.006	0.000	0.000	0.000	0.000	0.000	0.005	0.000	0.005	303.584	0.752	0.4267693E-04	0.6638497	0.4265814E-03	0.1920678
07262011	13	0.001	0.001	0.007	0.000	0.000	0.000	0.000	0.000	0.005	0.000	0.006	304.593	0.700	0.9715557E-05	0.6718925	0.5512853E-03	0.8592333E-01
07262011	14	0.000	0.001	0.008	0.000	0.000	0.000	0.000	0.000	0.006	0.000	0.007	304.495	0.678	0.4470348E-05	0.8097973	0.1327663E-02	-0.2147117
07262011	15	0.000	0.001	0.009	0.000	0.000	0.000	0.000	0.000	0.006	0.000	0.008	304.668	0.670	0.3337860E-05	0.9659338	0.2308334E-02	-0.3783514
07262011	16	0.000	0.001	0.009	0.000	0.000	0.000	0.000	0.000	0.007	0.000	0.008	304.898	0.670	0.4529953E-05	0.8813733	0.1355323E-02	-0.1868829
07262011	17	0.001	0.001	0.009	0.000	0.000	0.000	0.000	0.000	0.008	0.000	0.009	304.839	0.664	0.8106232E-05	0.8637236	0.6546711E-03	0.1203516
07262011	18	0.001	0.001	0.007	0.000	0.000	0.000	0.000	0.000	0.009	0.000	0.009	304.416	0.662	0.1883507E-04	0.8460010	0.4510089E-03	0.2731858
07262011	19	0.001	0.000	0.006	0.000	0.000	0.000	0.000	0.000	0.009	0.000	0.008	303.742	0.651	0.2759695E-04	0.7052563	0.4345052E-03	0.2103520
07262011	20	0.002	0.000	0.003	0.000	0.000	0.000	0.000	0.000	0.010	0.000	0.007	300.912	0.783	0.5858541E-03	1.045670	0.6106864E-03	0.2335765
07262011	21	0.002	0.000	0.002	0.000	0.000	0.000	0.000	0.000	0.011	0.000	0.007	300.000	0.809	0.2184570E-02	1.233729	0.3359534E-03	0.5649406
07262011	22	0.001	0.000	0.001	0.001	0.000	0.000	0.000	0.000	0.012	0.000	0.007	299.352	0.829	0.000000	1.369150	0.2136669E-02	-0.1932862
07262011	23	0.002	0.000	0.001	0.001	0.000	0.000	0.000	0.000	0.012	0.000	0.006	298.828	0.848	0.9102821E-03	1.342282	0.4952477E-03	0.4330213
07262011	24	0.001	0.000	0.001	0.001	0.000	0.000	0.000	0.000	0.012	0.000	0.007	298.278	0.876	0.000000	1.900971	0.2045926E-02	-0.3191459E-01
07272011	01	0.001	0.001	0.001	0.000	0.000	0.000	0.000	0.000	0.012	0.000	0.007	297.804	0.901	0.8789480E-02	2.264344	0.2816169E-03	0.9052837
07272011	02	0.001	0.001	0.001	0.000	0.000	0.000	0.001	0.000	0.014	0.000	0.008	297.546	0.905	NaN	2.898506	0.3081647E-03	0.9733914
07272011	03	0.002	0.001	0.001	0.000	0.000	0.000	0.001	0.000	0.012	0.000	0.007	297.296	0.923	NaN	2.847614	0.3006977E-03	0.9763510
07272011	04	0.002	0.001	0.002	0.000	0.000	0.000	0.001	0.000	0.011	0.000	0.008	297.174	0.932	0.1080132E-01	3.646454	0.2092210E-02	0.2412654
07272011	05	0.002	0.001	0.002	0.000	0.000	0.000	0.001	0.000	0.011	0.000	0.008	297.130	0.934	0.1083368E-01	3.646454	0.2088351E-02	0.2420671
07272011	06	0.002	0.000	0.002	0.000	0.000	0.000	0.000	0.000	0.010	0.000	0.008	297.125	0.937	0.5794168E-02	4.210526	0.9539888E-03	0.6447931
07272011	07	0.002	0.000	0.001	0.000	0.000	0.000	0.000	0.000	0.009	0.000	0.007	297.784	0.936	0.6117046E-02	3.704343	0.6991510E-03	0.7241402
07272011	08	0.001	0.000	0.001	0.000	0.001	0.000	0.000	0.000	0.010	0.000	0.008	299.267	0.890	0.000000	2.311133	0.2190693E-02	0.2324338E-01
07272011	09	0.002	0.001	0.002	0.000	0.001	0.000	0.000	0.001	0.009	0.000	0.007	300.413	0.865	0.2394289E-01	1.545539	0.2038001E-02	-0.1201246
07272011	10	0.002	0.002	0.004	0.000	0.000	0.000	0.000	0.000	0.007	0.000	0.005	301.407	0.838	0.1328111E-02	1.028168	0.2789203E-03	0.5665841
07272011	11	0.002	0.002	0.005	0.000	0.000	0.000	0.000	0.000	0.007	0.000	0.005	302.171	0.795	0.7967949E-03	0.8320401	0.2954469E-03	0.4496649
07272011	12	0.001	0.001	0.006	0.000	0.000	0.000	0.000	0.000	0.008	0.000	0.006	303.584	0.752	0.1192093E-03	0.7518797	0.5734465E-03	0.1176555
07272011	13	0.001	0.001	0.007	0.000	0.000	0.000	0.000	0.000	0.009	0.000	0.007	304.593	0.700	0.6371737E-04	0.7229801	0.5731215E-03	0.1008797
07272011	14	0.001	0.001	0.008	0.000	0.000	0.000	0.000	0.000	0.010	0.000	0.008	304.495	0.678	0.5155802E-04	0.7720112	0.5863880E-03	0.1194385
07272011	15	0.001	0.001	0.009	0.000	0.000	0.000	0.000	0.000	0.012	0.000	0.009	304.668	0.670	0.6222725E-04	0.8242393	0.7290745E-03	0.5328143E-01
07272011	16	0.002	0.001	0.009	0.000	0.000	0.000	0.000	0.000	0.014	0.000	0.010	304.898	0.670	0.1259446E-03	0.9362779	0.9350033E-03	0.5916124E-03
07272011	17	0.002	0.001	0.009	0.000	0.000	0.000	0.000	0.000	0.015	0.000	0.011	304.839	0.664	0.9673834E-04	0.9736443	0.1022649E-02	-0.2132608E-01
07272011	18	0.002	0.001	0.007	0.000	0.000	0.000	0.000	0.000	0.016	0.000	0.012	304.416	0.662	0.8720160E-04	1.045296	0.1101126E-02	-0.2259761E-01
07272011	19	0.003	0.000	0.006	0.000	0.000	0.000	0.000	0.000	0.016	0.000	0.011	303.742	0.651	0.2468824E-03	1.000374	0.1023992E-02	-0.1013432E-01
07272011	20	0.003	0.000	0.003	0.000	0.000	0.000	0.000	0.001	0.014	0.000	0.009	300.729	0.877	NaN	2.203857	0.1282972E-02	0.2349661
07272011	21	0.002	0.000	0.002	0.000	0.000	0.000	0.000	0.001	0.012	0.000	0.009	299.859	0.907	0.5589008E-02	2.843434	0.2397936E-02	0.7400551E-01
07272011	22	0.002	0.000	0.002	0.000	0.000	0.000	0.000	0.000	0.011	0.000	0.010	299.776	0.871	0.7243752E-03	2.503431	0.1388646E-02	0.2559441
07272011	23	0.002	0.001	0.002	0.000	0.001	0.000	0.001	0.000	0.013	0.000	0.010	299.310	0.900	0.4643857E-02	3.182160	0.2498006E-02	0.1051286
07272011	24	0.003	0.001	0.002	0.000	0.001	0.000	0.001	0.000	0.016	0.000	0.011	298.747	0.945	0.5430633E-01	7.219581	0.2632710E-02	0.4381090
07282011	01	0.002	0.001	0.001	0.000	0.001	0.000	0.001	0.000	0.018	0.000	0.011	298.377	0.965	NaN	12.65036	0.2473290E-03	1.708828
07282011	02	0.002	0.002	0.001	0.000	0.001	0.000	0.001	0.000	0.017	0.000	0.010	298.135	0.967	NaN	11.50093	0.2491829E-03	1.664215
07282011	03	0.002	0.001	0.002	0.000	0.001	0.000	0.001	0.000	0.012	0.000	0.008	297.932	0.968	0.1093466	9.202085	0.2220783E-02	0.6173801
07282011	04	0.002	0.001	0.002	0.000	0.001	0.000	0.000	0.000	0.009	0.000	0.007	297.770	0.972	0.000000	7.899403	0.2073263E-02	0.5809398
07282011	05	0.002	0.001	0.002	0.000	0.001	0.000	0.000	0.000	0.008	0.000	0.007	297.693	0.968	0.000000	7.822775	0.2132551E-02	0.5644614
07282011	06	0.002	0.001	0.002	0.000	0.001	0.000	0.000	0.000	0.009	0.000	0.006	297.619	0.967	0.000000	6.903234	0.1812636E-02	0.5807421
07282011	07	0.002	0.001	0.002	0.000	0.001	0.000	0.000	0.000	0.011	0.000	0.007	298.323	0.931	0.1984835E-04	3.272125	0.2002113E-02	0.2133414
07282011	08	0.002	0.001	0.003	0.000	0.001	0.000	0.000	0.000	0.010	0.000	0.006	299.412	0.889	0.9123087E-03	1.804935	0.5702679E-03	0.5003825
07282011	09	0.001	0.001	0.005	0.000	0.000	0.000	0.000	0.000	0.007	0.000	0.005	299.792	0.851	0.6389022E-03	1.067595	0.4966411E-03	0.3323641
07282011	10	0.001	0.000	0.005	0.000	0.000	0.000	0.000	0.000	0.007	0.000	0.005	301.137	0.809	0.3439784E-03	0.8487524	0.4959833E-03	0.2333139
07282011	11	0.002	0.000	0.005	0.000	0.000	0.000	0.000	0.000	0.007	0.000	0.005	300.833	0.808	0.9620786E-03	0.8740165	0.3100262E-03	0.4501213
07282011	12	0.001	0.000	0.004	0.000	0.000	0.000	0.000	0.000	0.007	0.000	0.004	302.844	0.752	0.8749962E-04	0.5571031	0.8043313E-03	-0.1594994
07282011	13	0.002	0.000	0.005	0.000	0.000	0.000	0.000	0.000	0.006	0.000	0.004	301.648	0.771	0.1193881E-03	0.6024097	0.7632553E-03	-0.1027780
07282011	14	0.002	0.000	0.004	0.000	0.000	0.000	0.000	0.000	0.007	0.000	0.004	303.282	0.746	0.6717443E-04	0.5571031	0.8123238E-03	-0.1637936
07282011	15	0.002	0.000	0.005	0.000	0.000	0.000	0.000	0.000	0.007	0.000	0.004	301.172	0.802	0.1441836E-03	0.6861064	0.6691152E-03	0.1089054E-01
07282011	16	0.003	0.000	0.004	0.000	0.000	0.000	0.000	0.000	0.007	0.000	0.004	301.453	0.815	0.2138019E-03	0.7561437	0.4861770E-03	0.1918099
07282011	17	0.002	0.000	0.004	0.000	0.000	0.000	0.000	0.000	0.007	0.000	0.004	300.444	0.820	0.1944304E-03	0.7561437	0.6172655E-03	0.8813233E-01
07282011	18	0.001	0.000	0.005	0.000	0.000	0.000	0.000	0.000	0.007	0.000	0.004	300.105	0.837	0.2493858E-03	0.8438820	0.6499926E-03	0.1133733
07282011	19	0.001	0.000	0.005	0.000	0.000	0.000	0.000	0.000	0.005	0.000	0.004	299.091	0.861	0.4287958E-03	0.9009010	0.4651307E-03	0.2871021
07282011	20	0.001	0.000	0.006	0.000	0.000	0.000	0.000	0.000	0.004	0.000	0.004	298.363	0.889	0.4100800E-03	1.183049	0.6584343E-03	0.2544904
07282011	21	0.001	0.000	0.005	0.000	0.000	0.000	0.000	0.000	0.004	0.000	0.005	297.871	0.914	0.4288554E-03	1.851852	0.1319181E-02	0.1473018
07282011	22	0.000	0.000	0.004	0.000	0.000	0.000	0.000	0.000	0.003	0.000	0.005	297.624	0.929	0.3551245E-03	2.605571	0.2773584E-02	-0.2713846E-01
07282011	23	0.000	0.000	0.005	0.000	0.000	0.000	0.000	0.000	0.002	0.000	0.005	297.456	0.941	0.3761053E-03	3.119923	0.3663064E-02	-0.6970056E-01
07282011	24	0.000	0.000	0.005	0.000	0.000	0.000	0.000	0.000	0.002	0.000	0.005	297.296	0.953	0.5536675E-03	3.677994	0.3703944E-02	-0.3053363E-02
07292011	01	0.000	0.000	0.004	0.000	0.000	0.000	0.000	0.000	0.002	0.000	0.004	297.124	0.969	0.1396716E-02	4.722222	0.2728886E-02	0.2381611
07292011	02	0.000	0.000	0.004	0.000	0.000	0.000	0.000	0.000	0.002	0.000	0.004	297.129	0.968	0.1396000E-02	4.722222	0.2728797E-02	0.2381751
07292011	03	0.000	0.000	0.004	0.000	0.000	0.000	0.000	0.000	0.002	0.000	0.004	297.234	0.967	0.1382828E-02	4.722222	0.2726945E-02	0.2384701
07292011	04	0.000	0.001	0.004	0.000	0.000	0.000	0.000	0.000	0.002	0.000	0.004	297.163	0.972	0.1391709E-02	4.722222	0.2728197E-02	0.2382706
07292011	05	0.001	0.001	0.004	0.000	0.001	0.000	0.000	0.000	0.004	0.000	0.006	297.079	0.978	0.000000	10.22896	0.2686267E-02	0.5806825
07292011	06	0.001	0.001	0.003	0.000	0.001	0.000	0.001	0.000	0.006	0.000	0.007	297.064	0.979	0.1955223E-01	12.03106	0.2421458E-02	0.6962268
07292011	07	0.001	0.001	0.003	0.000	0.001	0.000	0.001	0.000	0.009	0.000	0.008	297.687	0.972	0.1845449E-01	8.933887	0.2334951E-02	0.5827626
07292011	08	0.002	0.002	0.005	0.000	0.001	0.000	0.001	0.000	0.011	0.000	0.009	299.295	0.903	0.3580630E-02	2.854291	0.2323211E-02	0.8940952E-01
07292011	09	0.001	0.004	0.007	0.000	0.001	0.000	0.001	0.000	0.007	0.000	0.009	301.010	0.819	0.1685023E-03	1.731244	0.1915230E-02	-0.4386261E-01
07292011	10	0.000	0.006	0.006	0.000	0.000	0.000	0.000	0.000	0.004	0.000	0.006	302.380	0.758	0.1156330E-04	1.045023	0.2403915E-02	-0.3617931
07292011	11	0.000	0.004	0.005	0.000	0.000	0.000	0.000	0.000	0.003	0.000	0.004	303.561	0.710	0.3576279E-05	0.5533164	0.1207707E-02	-0.3389880
07292011	12	0.000	0.001	0.004	0.000	0.000	0.000	0.000	0.000	0.002	0.000	0.003	304.075	0.680	0.1430511E-05	0.3957186	0.1124421E-02	-0.4535427
07292011	13	0.000	0.000	0.003	0.000	0.000	0.000	0.000	0.000	0.002	0.000	0.003	305.028	0.641	0.6556511E-06	0.3500530	0.1095649E-02	-0.4955376
07292011	14	0.001	0.000	0.002	0.000	0.000	0.000	0.000	0.000	0.002	0.000	0.002	305.523	0.620	0.9477139E-05	0.1501502	0.1614587E-03	-0.3153556E-01
07292011	15	0.001	0.000	0.001	0.000	0.000	0.000	0.000	0.000	0.003	0.000	0.002	305.498	0.619	0.1102686E-04	0.1818182	0.6799786E-03	-0.5728579
07292011	16	0.002	0.000	0.001	0.000	0.000	0.000	0.000	0.000	0.003	0.000	0.002	305.262	0.630	0.7808208E-05	0.1872659	0.6891136E-03	-0.5658320
07292011	17	0.002	0.000	0.001	0.000	0.000	0.000	0.000	0.000	0.003	0.000	0.002	305.038	0.637	0.8642673E-05	0.1928640	0.6746879E-03	-0.5438517
07292011	18	0.002	0.000	0.001	0.000	0.000	0.000	0.000	0.000	0.003	0.000	0.001	304.665	0.636	0.8881092E-05	0.9643202E-01	0.1931604E-03	-0.3016969
07292011	19	0.003	0.000	0.001	0.000	0.000	0.000	0.000	0.000	0.003	0.000	0.001	303.503	0.645	0.1668930E-04	0.9940358E-01	0.1335903E-03	-0.1283728
07292011	20	0.004	0.000	0.000	0.000	0.000	0.000	0.000	0.000	0.003	0.000	0.002	302.126	0.710	NaN	0.2412545	0.2176299E-03	0.4475690E-01
07292011	21	0.002	0.000	0.001	0.000	0.000	0.000	0.000	0.000	0.003	0.000	0.002	301.293	0.738	0.3510714E-04	0.2684564	0.4878486E-03	-0.2594113
07292011	22	0.001	0.000	0.001	0.000	0.000	0.000	0.000	0.000	0.004	0.000	0.002	300.608	0.770	0.4917383E-04	0.3012048	0.4472807E-03	-0.1717182
07292011	23	0.001	0.000	0.001	0.000	0.000	0.000	0.000	0.000	0.005	0.000	0.002	299.927	0.810	0.1143813E-03	0.3597122	0.2675765E-03	0.1285073
07292011	24	0.001	0.000	0.001	0.000	0.000	0.000	0.000	0.000	0.005	0.000	0.003	299.273	0.853	0.2047420E-03	0.6711410	0.5423856E-03	0.9250563E-01
07302011	01	0.001	0.001	0.001	0.000	0.000	0.000	0.000	0.000	0.007	0.000	0.004	298.654	0.905	0.7456541E-03	1.454545	0.5121015E-03	0.4533713
07302011	02	0.002	0.001	0.001	0.000	0.000	0.000	0.000	0.000	0.011	0.000	0.006	298.232	0.932	0.2170503E-02	2.803738	0.4772793E-03	0.7689648
07302011	03	0.003	0.002	0.001	0.000	0.001	0.000	0.000	0.000	0.012	0.000	0.007	298.009	0.937	0.4464447E-02	3.825137	0.3724589E-03	1.011569
07302011	04	0.004	0.002	0.001	0.000	0.001	0.000	0.000	0.000	0.012	0.000	0.007	297.870	0.930	0.4545093E-02	3.272125	0.3057790E-03	1.029422
07302011	05	0.005	0.002	0.001	0.001	0.001	0.000	0.001	0.001	0.011	0.000	0.007	297.711	0.934	0.4815435E-01	2.796416	0.1792533E-04	2.193135
07302011	06	0.007	0.002	0.001	0.001	0.001	0.000	0.001	0.001	0.010	0.000	0.007	297.610	0.938	0.5393064E-01	3.272844	0.1975545E-04	2.219238
07302011	07	0.008	0.002	0.001	0.001	0.001	0.000	0.001	0.001	0.010	0.000	0.007	298.188	0.922	0.4304957E-01	2.442838	0.1622891E-04	2.177605
07302011	08	0.010	0.002	0.002	0.001	0.001	0.000	0.001	0.001	0.009	0.000	0.006	299.766	0.890	0.2047533E-01	1.493954	0.1317405E-04	2.054618
07302011	09	0.012	0.005	0.003	0.001	0.001	0.000	0.001	0.001	0.009	0.000	0.006	301.216	0.834	0.1189023E-01	0.9992036	0.1189040E-04	1.924458
07302011	10	0.008	0.022	0.007	0.000	0.000	0.000	0.000	0.001	0.010	0.000	0.006	302.597	0.765	NaN	1.210848	0.6235290E-03	0.2882330
07302011	11	0.002	0.031	0.006	0.000	0.000	0.000	0.000	0.000	0.009	0.000	0.005	303.949	0.695	0.6026030E-04	0.5834306	0.1022161E-02	-0.2435303
07302011	12	0.002	0.024	0.005	0.000	0.000	0.000	0.000	0.000	0.006	0.000	0.004	304.821	0.656	0.3963709E-04	0.4102564	0.9239361E-03	-0.3525866
07302011	13	0.002	0.016	0.004	0.000	0.000	0.000	0.000	0.000	0.005	0.000	0.004	305.487	0.623	0.7450581E-04	0.3319683	0.3208412E-03	0.1480659E-01
07302011	14	0.002	0.013	0.004	0.000	0.000	0.000	0.000	0.000	0.005	0.000	0.004	306.148	0.606	0.6657839E-04	0.3212403	0.3078051E-03	0.1855424E-01
07302011	15	0.002	0.010	0.004	0.000	0.000	0.000	0.000	0.000	0.005	0.000	0.004	306.229	0.602	0.6091595E-04	0.3108496	0.3109007E-03	-0.7133587E-04
07302011	16	0.002	0.007	0.003	0.000	0.000	0.000	0.000	0.000	0.005	0.000	0.004	306.240	0.600	0.6085634E-04	0.3108496	0.3105198E-03	0.4610667E-03
07302011	17	0.001	0.005	0.003	0.000	0.000	0.000	0.000	0.000	0.006	0.000	0.004	305.907	0.603	0.6181002E-04	0.3108496	0.3203384E-03	-0.1305872E-01
07302011	18	0.002	0.004	0.002	0.000	0.000	0.000	0.000	0.000	0.007	0.000	0.004	305.358	0.606	0.1937151E-04	0.3530450	0.1068002E-02	-0.4807421
07302011	19	0.006	0.002	0.002	0.000	0.000	0.000	0.000	0.000	0.007	0.000	0.004	304.652	0.615	0.6234646E-04	0.3636364	0.4292873E-03	-0.7208069E-01
07302011	20	0.007	0.001	0.001	0.000	0.000	0.000	0.000	0.000	0.006	0.000	0.004	302.934	0.666	0.1188517E-03	0.4232804	0.3615813E-03	0.6842222E-01
07302011	21	0.011	0.001	0.002	0.000	0.000	0.000	0.000	0.001	0.005	0.000	0.003	302.024	0.681	NaN	0.3147848	0.5007822E-04	0.7983649
07302011	22	0.018	0.001	0.002	0.000	0.000	0.000	0.001	0.001	0.005	0.000	0.004	301.222	0.709	NaN	0.4606948	0.3563825E-04	1.111497
07302011	23	0.025	0.002	0.003	0.000	0.001	0.000	0.001	0.001	0.004	0.000	0.004	300.521	0.748	NaN	0.6382880	0.2215054E-04	1.459632
07302011	24	0.031	0.002	0.003	0.000	0.001	0.000	0.001	0.001	0.004	0.000	0.004	299.887	0.793	NaN	0.7715064	0.1728487E-04	1.649673
