# Supplementary material for: Understanding nitrate formation in a world with less sulfate
Source: Copernicus journal article supplement (doi:10.5194/acp-18-12765-2018), 2018-09-05
Supplement: Supplementary file 2 [file acp-18-12765-2018-supplement.zip › DATA/RAW DATA FOR DIURNALS/data_extract_SOAS_jun_mod.csv]

Date	Hour	NH3	SO2	HNO3	CL	NA	MG	K	CA	NH4	NO3	SO4	T	RH	e_NO3	Water	H+	pH
06022011	01	0.040	0.050	0.008	0.004	0.003	0.002	0.006	0.013	0.062	0.002	0.050	297.431	0.808	0.6861556E-01	6.755360	0.1574200E-03	1.632589
06022011	02	0.048	0.052	0.007	0.003	0.003	0.002	0.007	0.014	0.058	0.003	0.049	297.023	0.840	0.1051687	7.523534	0.1059072E-03	1.851496
06022011	03	0.051	0.055	0.007	0.003	0.004	0.002	0.007	0.015	0.054	0.003	0.048	296.787	0.852	0.1252350	7.575661	0.8747118E-04	1.937556
06022011	04	0.051	0.056	0.006	0.003	0.004	0.002	0.008	0.015	0.050	0.003	0.047	296.615	0.858	0.1361246	7.821208	0.7956714E-04	1.992540
06022011	05	0.049	0.054	0.006	0.003	0.004	0.002	0.008	0.015	0.047	0.003	0.046	296.459	0.865	0.1418739	8.124622	0.7818502E-04	2.016680
06022011	06	0.049	0.050	0.005	0.003	0.004	0.002	0.008	0.015	0.044	0.003	0.045	296.365	0.868	0.1389439	7.840990	0.7514069E-04	2.018496
06022011	07	0.049	0.046	0.008	0.003	0.005	0.002	0.009	0.015	0.042	0.003	0.044	297.201	0.871	0.1225600	7.623530	0.6809749E-04	2.049025
06022011	08	0.040	0.041	0.016	0.002	0.005	0.002	0.009	0.015	0.043	0.003	0.043	300.374	0.780	0.2918595E-01	4.499803	0.1031918E-03	1.639548
06022011	09	0.038	0.094	0.032	0.001	0.004	0.002	0.007	0.010	0.063	0.003	0.047	302.310	0.694	0.1624662E-01	4.271229	0.1946537E-03	1.341290
06022011	10	0.014	0.105	0.048	0.000	0.003	0.001	0.004	0.005	0.084	0.002	0.050	304.306	0.603	NaN	4.475232	0.2402228E-01	-0.7297986
06022011	11	0.004	0.066	0.041	0.000	0.002	0.001	0.003	0.003	0.067	0.001	0.045	306.134	0.529	0.9971261E-03	2.781202	0.7312260E-02	-0.4198191
06022011	12	0.003	0.054	0.038	0.000	0.002	0.001	0.003	0.003	0.062	0.001	0.045	307.836	0.468	0.1800060E-03	2.126185	0.6717261E-02	-0.4995911
06022011	13	0.002	0.056	0.037	0.000	0.002	0.000	0.002	0.003	0.061	0.001	0.047	310.087	0.395	0.2610683E-04	1.477147	0.3842774E-02	-0.4152211
06022011	14	0.001	0.032	0.031	0.000	0.001	0.000	0.002	0.002	0.054	0.001	0.053	307.468	0.440	0.1180172E-04	2.107098	0.1081295E-02	0.2897405
06022011	15	0.000	0.009	0.018	0.000	0.001	0.000	0.001	0.002	0.048	0.001	0.059	305.300	0.530	0.2503395E-05	3.946591	0.7880890E-02	-0.3003531
06022011	16	0.000	0.005	0.010	0.001	0.001	0.000	0.001	0.002	0.056	0.000	0.069	306.182	0.528	0.000000	4.696563	0.9979699E-02	-0.3273373
06022011	17	0.000	0.009	0.013	0.001	0.001	0.000	0.002	0.002	0.066	0.000	0.079	306.981	0.471	0.000000	4.273363	0.8594328E-02	-0.3034422
06022011	18	0.000	0.016	0.016	0.001	0.001	0.000	0.002	0.002	0.069	0.000	0.088	306.139	0.519	0.000000	6.027814	0.1506704E-01	-0.3978682
06022011	19	0.000	0.021	0.016	0.001	0.001	0.000	0.002	0.002	0.075	0.000	0.097	304.488	0.557	0.000000	7.669763	0.1875134E-01	-0.3882504
06022011	20	0.000	0.027	0.016	0.001	0.001	0.000	0.002	0.002	0.084	0.000	0.107	302.434	0.567	0.000000	8.682358	0.2026595E-01	-0.3681292
06022011	21	0.000	0.032	0.017	0.002	0.002	0.000	0.003	0.002	0.092	0.000	0.113	301.150	0.574	0.000000	8.793199	0.1658592E-01	-0.2755927
06022011	22	0.000	0.037	0.019	0.001	0.002	0.000	0.004	0.002	0.098	0.000	0.115	300.233	0.601	0.000000	9.462791	0.1297585E-01	-0.1371167
06022011	23	0.000	0.040	0.021	0.001	0.002	0.000	0.004	0.002	0.102	0.000	0.114	299.397	0.645	0.000000	10.75686	0.1149066E-01	-0.2865940E-01
06022011	24	0.001	0.042	0.021	0.001	0.002	0.001	0.005	0.002	0.105	0.000	0.111	298.592	0.705	0.000000	12.72097	0.1112568E-01	0.5819346E-01
06032011	01	0.001	0.042	0.020	0.001	0.002	0.001	0.005	0.002	0.107	0.000	0.107	297.763	0.785	0.000000	17.16223	0.1524118E-01	0.5155496E-01
06032011	02	0.001	0.036	0.016	0.001	0.002	0.001	0.005	0.002	0.107	0.001	0.101	297.198	0.838	0.000000	20.83619	0.1638433E-01	0.1043897
06032011	03	0.001	0.028	0.012	0.001	0.002	0.001	0.004	0.003	0.108	0.001	0.095	296.937	0.852	0.000000	20.29058	0.1503467E-01	0.1302007
06032011	04	0.002	0.023	0.009	0.001	0.003	0.001	0.004	0.003	0.109	0.001	0.087	296.834	0.846	0.000000	18.09508	0.1276250E-01	0.1516247
06032011	05	0.002	0.017	0.006	0.001	0.003	0.001	0.004	0.003	0.109	0.001	0.080	296.759	0.835	0.000000	15.36580	0.1108325E-01	0.1418878
06032011	06	0.003	0.012	0.004	0.001	0.003	0.001	0.004	0.003	0.105	0.001	0.072	296.574	0.853	0.000000	14.92251	0.8879974E-02	0.2254303
06032011	07	0.003	0.011	0.004	0.001	0.003	0.001	0.003	0.003	0.102	0.000	0.068	297.472	0.852	0.000000	14.14106	0.8166557E-02	0.2384430
06032011	08	0.003	0.016	0.006	0.001	0.003	0.001	0.003	0.003	0.091	0.000	0.063	300.215	0.747	0.000000	7.926423	0.8651140E-02	-0.3799615E-01
06032011	09	0.001	0.056	0.018	0.001	0.003	0.001	0.002	0.003	0.053	0.001	0.045	302.540	0.659	0.000000	3.864671	0.5339039E-02	-0.1403506
06032011	10	0.001	0.074	0.029	0.000	0.002	0.000	0.002	0.003	0.036	0.001	0.035	304.637	0.580	0.6395578E-04	2.204093	0.2338032E-02	-0.2562041E-01
06032011	11	0.001	0.086	0.034	0.000	0.002	0.000	0.001	0.003	0.033	0.001	0.037	307.051	0.489	0.9179115E-05	1.759714	0.1023273E-02	0.2354506
06032011	12	0.000	0.111	0.040	0.000	0.001	0.000	0.001	0.002	0.034	0.001	0.049	309.253	0.416	0.1192093E-06	2.640453	0.1126708E-01	-0.6301329
06032011	13	0.000	0.064	0.032	0.000	0.001	0.000	0.001	0.002	0.032	0.000	0.056	306.985	0.483	0.7152557E-06	4.183750	0.2069701E-01	-0.6943420
06032011	14	0.000	0.028	0.022	0.000	0.001	0.000	0.001	0.002	0.035	0.000	0.062	307.331	0.450	0.5960464E-06	4.346986	0.2364850E-01	-0.7356154
06032011	15	0.000	0.016	0.019	0.000	0.001	0.000	0.001	0.001	0.038	0.000	0.064	308.784	0.408	0.2980232E-06	4.022722	0.2346833E-01	-0.7659622
06032011	16	0.000	0.009	0.015	0.001	0.001	0.000	0.001	0.001	0.040	0.000	0.059	306.083	0.503	0.000000	4.316778	0.1672872E-01	-0.5883030
06032011	17	0.000	0.004	0.011	0.001	0.001	0.000	0.001	0.001	0.043	0.000	0.050	305.923	0.456	0.000000	2.547775	0.4405075E-02	-0.2377923
06032011	18	0.001	0.004	0.009	0.001	0.001	0.000	0.001	0.001	0.054	0.000	0.045	306.065	0.448	0.000000	1.850470	0.1873845E-02	-0.5451653E-02
06032011	19	0.003	0.004	0.009	0.001	0.001	0.000	0.001	0.001	0.068	0.000	0.044	304.308	0.497	0.000000	2.348600	0.8478445E-02	-0.5575072
06032011	20	0.004	0.005	0.009	0.001	0.001	0.000	0.001	0.001	0.072	0.000	0.045	302.108	0.531	0.000000	2.758913	0.8320436E-02	-0.4794081
06032011	21	0.003	0.009	0.009	0.002	0.001	0.000	0.001	0.001	0.072	0.000	0.046	300.930	0.542	0.000000	2.822612	0.9593586E-02	-0.5313299
06032011	22	0.003	0.016	0.011	0.002	0.001	0.000	0.001	0.001	0.074	0.000	0.047	299.920	0.589	0.000000	3.409657	0.9183289E-02	-0.4302875
06032011	23	0.004	0.020	0.011	0.001	0.001	0.000	0.001	0.001	0.076	0.000	0.047	299.080	0.656	0.000000	4.409738	0.7616260E-02	-0.2373290
06032011	24	0.005	0.020	0.011	0.001	0.001	0.000	0.002	0.001	0.080	0.000	0.046	298.310	0.733	0.000000	5.757470	0.5479785E-02	0.2146818E-01
06042011	01	0.011	0.018	0.010	0.001	0.001	0.000	0.002	0.001	0.079	0.001	0.043	297.602	0.813	0.6111860E-01	7.547443	0.2715355E-03	1.443973
06042011	02	0.017	0.016	0.009	0.001	0.001	0.001	0.002	0.002	0.069	0.001	0.038	297.114	0.858	0.6824619E-01	8.604445	0.2354227E-03	1.562875
06042011	03	0.019	0.015	0.009	0.001	0.002	0.001	0.002	0.002	0.059	0.001	0.034	296.851	0.867	0.6498885E-01	8.200649	0.2230757E-03	1.565396
06042011	04	0.022	0.017	0.009	0.001	0.002	0.001	0.003	0.002	0.048	0.001	0.029	296.648	0.871	0.5523533E-01	6.910008	0.1860753E-03	1.569790
06042011	05	0.025	0.019	0.008	0.001	0.002	0.001	0.004	0.003	0.038	0.001	0.026	296.413	0.879	0.5973667E-01	6.346768	0.1320399E-03	1.681847
06042011	06	0.026	0.022	0.008	0.001	0.003	0.001	0.005	0.004	0.033	0.001	0.024	296.455	0.858	0.5278677E-01	4.807293	0.9093341E-04	1.723177
06042011	07	0.026	0.023	0.011	0.001	0.003	0.001	0.006	0.004	0.030	0.001	0.024	297.176	0.862	0.4253674E-01	4.794751	0.9582087E-04	1.699306
06042011	08	0.027	0.031	0.022	0.001	0.004	0.001	0.007	0.005	0.029	0.002	0.026	299.540	0.797	0.1778394E-01	3.637523	0.1250896E-03	1.463585
06042011	09	0.044	0.088	0.042	0.001	0.005	0.001	0.008	0.006	0.036	0.003	0.030	302.067	0.692	0.1091450E-01	2.750710	0.1109027E-03	1.394503
06042011	10	0.027	0.123	0.057	0.000	0.003	0.001	0.006	0.004	0.047	0.002	0.032	304.612	0.581	NaN	3.182666	0.2250941E-01	-0.8495730
06042011	11	0.004	0.119	0.066	0.000	0.002	0.000	0.003	0.002	0.045	0.001	0.031	306.570	0.492	0.4753470E-03	1.657052	0.5965762E-02	-0.5563297
06042011	12	0.001	0.076	0.050	0.000	0.001	0.000	0.002	0.001	0.031	0.000	0.030	306.974	0.482	0.1579523E-04	1.382799	0.1184071E-02	0.6738120E-01
06042011	13	0.000	0.049	0.033	0.001	0.001	0.000	0.002	0.001	0.025	0.000	0.032	306.327	0.502	0.000000	1.896777	0.3398959E-02	-0.2533297
06042011	14	0.000	0.032	0.020	0.001	0.001	0.000	0.002	0.001	0.029	0.000	0.035	307.490	0.456	0.000000	1.720466	0.2340284E-02	-0.1336226
06042011	15	0.001	0.030	0.019	0.001	0.001	0.000	0.002	0.001	0.040	0.000	0.040	308.873	0.404	0.000000	1.372149	0.7405728E-03	0.2678336
06042011	16	0.001	0.054	0.028	0.001	0.001	0.000	0.002	0.001	0.051	0.000	0.040	309.455	0.368	0.000000	1.154845	0.2088567E-02	-0.2573247
06042011	17	0.002	0.034	0.021	0.001	0.001	0.000	0.002	0.001	0.058	0.000	0.040	305.339	0.527	0.000000	2.224591	0.6448457E-02	-0.4622057
06042011	18	0.004	0.020	0.012	0.001	0.001	0.000	0.002	0.001	0.062	0.000	0.041	304.318	0.589	0.000000	2.953130	0.7200003E-02	-0.3870501
06042011	19	0.006	0.024	0.012	0.001	0.001	0.000	0.002	0.002	0.073	0.000	0.043	303.185	0.620	0.1816750E-03	3.705989	0.6329645E-02	-0.2324752
06042011	20	0.014	0.029	0.012	0.002	0.001	0.000	0.002	0.002	0.073	0.001	0.041	301.224	0.603	0.2454054E-01	3.318626	0.1637256E-03	1.306842
06042011	21	0.018	0.027	0.008	0.002	0.002	0.001	0.003	0.003	0.068	0.001	0.040	299.912	0.595	0.2991503E-01	3.210079	0.1389033E-03	1.363803
06042011	22	0.017	0.025	0.006	0.003	0.002	0.001	0.004	0.005	0.063	0.001	0.040	299.793	0.555	0.2863300E-01	2.684812	0.1112048E-03	1.382790
06042011	23	0.018	0.028	0.005	0.004	0.002	0.001	0.004	0.007	0.057	0.001	0.040	298.724	0.633	0.3670454E-01	3.115773	0.1260812E-03	1.392915
06042011	24	0.023	0.029	0.005	0.004	0.003	0.002	0.005	0.008	0.053	0.001	0.040	297.977	0.722	0.4335040E-01	4.105076	0.1236526E-03	1.521118
06052011	01	0.025	0.027	0.005	0.004	0.003	0.002	0.006	0.009	0.049	0.001	0.040	297.526	0.764	0.4693991E-01	4.579364	0.1247569E-03	1.564741
06052011	02	0.028	0.027	0.004	0.003	0.003	0.002	0.007	0.011	0.045	0.001	0.039	296.960	0.831	0.5927759E-01	5.616120	0.1152380E-03	1.687841
06052011	03	0.030	0.029	0.004	0.003	0.004	0.002	0.008	0.012	0.041	0.002	0.039	296.686	0.856	0.7803738E-01	6.483671	0.9757469E-04	1.822484
06052011	04	0.030	0.032	0.004	0.003	0.004	0.002	0.010	0.013	0.037	0.002	0.039	296.464	0.866	0.8986372E-01	6.675739	0.8064379E-04	1.917928
06052011	05	0.030	0.038	0.005	0.003	0.005	0.002	0.011	0.013	0.035	0.002	0.040	296.290	0.871	0.9329152E-01	6.949010	0.8481285E-04	1.913461
06052011	06	0.029	0.045	0.005	0.003	0.005	0.002	0.012	0.014	0.034	0.003	0.041	296.216	0.872	0.9337658E-01	6.954000	0.8333373E-04	1.921414
06052011	07	0.028	0.053	0.008	0.003	0.006	0.002	0.012	0.015	0.034	0.003	0.042	297.107	0.848	0.6624675E-01	6.108370	0.8785052E-04	1.842181
06052011	08	0.034	0.100	0.021	0.002	0.006	0.002	0.012	0.015	0.043	0.004	0.045	299.529	0.761	0.3019416E-01	4.449096	0.1107026E-03	1.604114
06052011	09	0.038	0.215	0.039	0.001	0.005	0.002	0.008	0.010	0.072	0.004	0.053	301.987	0.661	0.1605368E-01	4.495207	0.2564044E-03	1.243824
06052011	10	0.016	0.201	0.045	0.000	0.003	0.001	0.005	0.006	0.083	0.001	0.053	304.848	0.544	NaN	3.779832	0.2275834E-01	-0.7796682
06052011	11	0.004	0.178	0.043	0.000	0.002	0.001	0.004	0.004	0.075	0.000	0.051	306.951	0.457	0.5930066E-03	2.477504	0.7907062E-02	-0.5040008
06052011	12	0.002	0.127	0.036	0.000	0.001	0.000	0.003	0.003	0.064	0.000	0.048	308.640	0.402	0.3194809E-04	1.516475	0.4279960E-02	-0.4506046
06052011	13	0.001	0.094	0.031	0.000	0.001	0.000	0.003	0.002	0.054	0.000	0.045	310.444	0.349	0.9894371E-05	1.161367	0.1776193E-02	-0.1845206
06052011	14	0.001	0.056	0.028	0.000	0.001	0.000	0.003	0.002	0.048	0.000	0.045	310.285	0.338	0.5185604E-05	1.129111	0.9158176E-03	0.9092757E-01
06052011	15	0.001	0.035	0.026	0.000	0.001	0.000	0.003	0.002	0.051	0.000	0.047	308.763	0.376	0.9417534E-05	1.416604	0.1145581E-02	0.9222282E-01
06052011	16	0.001	0.021	0.022	0.000	0.001	0.000	0.004	0.002	0.061	0.000	0.049	306.379	0.433	0.3081560E-04	1.753020	0.2776570E-02	-0.1997217
06052011	17	0.004	0.022	0.019	0.000	0.002	0.000	0.004	0.002	0.074	0.000	0.049	307.691	0.368	0.1257658E-03	1.709417	0.7977446E-02	-0.6690158
06052011	18	0.008	0.037	0.022	0.000	0.002	0.000	0.004	0.002	0.079	0.000	0.049	307.153	0.355	0.2619267E-02	1.895914	0.7958376E-02	-0.6230057
06052011	19	0.005	0.048	0.017	0.000	0.002	0.000	0.004	0.002	0.086	0.000	0.048	305.953	0.366	NaN	1.975286	0.9659369E-02	-0.6893187
06052011	20	0.007	0.028	0.008	0.001	0.002	0.000	0.004	0.003	0.086	0.000	0.049	300.780	0.507	0.3043860E-01	2.993865	0.1400748E-03	1.329872
06052011	21	0.009	0.016	0.006	0.002	0.002	0.001	0.005	0.004	0.084	0.000	0.050	299.128	0.564	0.4251248E-01	3.503081	0.1457765E-03	1.380763
06052011	22	0.013	0.011	0.005	0.003	0.003	0.001	0.007	0.005	0.081	0.000	0.051	298.704	0.562	0.4756582E-01	3.477245	0.1465319E-03	1.375303
06052011	23	0.019	0.012	0.005	0.004	0.004	0.001	0.009	0.006	0.079	0.001	0.052	297.243	0.650	0.5380815E-01	4.551327	0.1787131E-03	1.405982
06052011	24	0.030	0.017	0.005	0.004	0.005	0.001	0.010	0.007	0.077	0.001	0.054	296.522	0.713	0.6602103E-01	5.684538	0.2111567E-03	1.430090
06062011	01	0.040	0.021	0.005	0.004	0.005	0.002	0.012	0.008	0.073	0.001	0.054	295.769	0.806	0.1247091	8.358592	0.1538178E-03	1.735126
06062011	02	0.045	0.025	0.004	0.004	0.006	0.002	0.013	0.010	0.068	0.002	0.055	295.245	0.863	0.2055171	10.90692	0.1157720E-03	1.974098
06062011	03	0.041	0.027	0.004	0.004	0.006	0.002	0.014	0.012	0.064	0.002	0.055	294.869	0.887	0.2599841	13.16154	0.1041092E-03	2.101818
06062011	04	0.035	0.031	0.005	0.004	0.006	0.002	0.015	0.013	0.061	0.003	0.055	294.616	0.895	0.2633869	14.20264	0.1119109E-03	2.103497
06062011	05	0.029	0.035	0.005	0.004	0.007	0.002	0.015	0.014	0.062	0.003	0.056	294.394	0.894	0.2293620	12.88012	0.1234497E-03	2.018430
06062011	06	0.025	0.039	0.006	0.004	0.007	0.002	0.015	0.014	0.064	0.003	0.058	294.218	0.886	0.2055275	13.43969	0.1616917E-03	1.919701
06062011	07	0.023	0.041	0.010	0.004	0.007	0.002	0.015	0.014	0.066	0.004	0.059	295.022	0.889	0.1670845	13.79739	0.1968300E-03	1.845706
06062011	08	0.020	0.049	0.021	0.003	0.007	0.002	0.015	0.014	0.070	0.004	0.060	298.127	0.766	0.3737766E-01	6.991339	0.3064942E-03	1.358138
06062011	09	0.019	0.114	0.043	0.001	0.006	0.002	0.012	0.011	0.085	0.004	0.063	300.552	0.660	0.1985675E-01	5.368019	0.3680239E-03	1.163938
06062011	10	0.006	0.161	0.048	0.001	0.004	0.001	0.008	0.007	0.081	0.002	0.057	303.206	0.530	0.4732609E-04	3.600814	0.6685125E-02	-0.2687089
06062011	11	0.002	0.178	0.048	0.000	0.003	0.001	0.006	0.004	0.063	0.001	0.049	305.513	0.425	0.1170635E-03	1.912009	0.6570161E-02	-0.5360862
06062011	12	0.002	0.146	0.046	0.000	0.003	0.001	0.006	0.003	0.060	0.001	0.048	307.425	0.358	0.3945827E-04	1.398125	0.4573564E-02	-0.5147088
06062011	13	0.001	0.118	0.045	0.000	0.002	0.000	0.006	0.003	0.065	0.000	0.052	309.388	0.298	0.1037121E-04	1.024099	0.2550193E-02	-0.3962310
06062011	14	0.001	0.097	0.043	0.000	0.002	0.000	0.006	0.003	0.068	0.000	0.054	310.515	0.265	0.5364418E-05	0.9083382	0.2173595E-02	-0.3789310
06062011	15	0.002	0.082	0.040	0.000	0.002	0.000	0.005	0.003	0.068	0.000	0.053	310.491	0.260	0.3993511E-05	0.8525339	0.2325394E-02	-0.4357849
06062011	16	0.003	0.079	0.037	0.000	0.002	0.000	0.005	0.003	0.065	0.000	0.049	310.078	0.265	0.8702278E-05	0.9200665	0.3952742E-02	-0.6330792
06062011	17	0.005	0.083	0.035	0.000	0.002	0.000	0.005	0.003	0.065	0.000	0.046	309.257	0.276	0.3623962E-04	1.062366	0.7166779E-02	-0.8290498
06062011	18	0.009	0.090	0.031	0.000	0.002	0.001	0.006	0.004	0.069	0.000	0.044	308.095	0.308	NaN	1.414944	0.1779840E-01	-1.099642
06062011	19	0.022	0.090	0.020	0.001	0.003	0.001	0.006	0.004	0.068	0.001	0.043	305.599	0.389	0.8292675E-02	1.786263	0.7627973E-04	1.369536
06062011	20	0.038	0.086	0.014	0.002	0.003	0.001	0.007	0.006	0.063	0.001	0.043	302.734	0.385	0.1111406E-01	1.675377	0.8725463E-04	1.283324
06062011	21	0.051	0.088	0.011	0.003	0.003	0.001	0.008	0.007	0.059	0.001	0.044	300.909	0.399	0.1418030E-01	1.709872	0.9809533E-04	1.241315
06062011	22	0.053	0.093	0.009	0.004	0.004	0.002	0.010	0.009	0.055	0.001	0.045	299.605	0.438	0.1770031E-01	1.908805	0.9636198E-04	1.296856
06062011	23	0.049	0.094	0.007	0.004	0.004	0.002	0.011	0.011	0.052	0.001	0.046	298.378	0.527	0.2547282E-01	2.401424	0.1076334E-03	1.348522
06062011	24	0.041	0.092	0.005	0.005	0.005	0.002	0.011	0.013	0.049	0.002	0.047	297.420	0.625	0.3354764E-01	3.196064	0.1163617E-03	1.438806
06072011	01	0.031	0.099	0.004	0.005	0.005	0.002	0.011	0.013	0.050	0.002	0.048	296.650	0.695	0.4569530E-01	4.142241	0.1364543E-03	1.482248
06072011	02	0.021	0.096	0.003	0.005	0.005	0.002	0.010	0.013	0.051	0.002	0.048	296.140	0.733	0.5457270E-01	4.610304	0.1418399E-03	1.511931
06072011	03	0.011	0.092	0.003	0.005	0.004	0.002	0.009	0.012	0.058	0.002	0.047	295.919	0.742	0.5701792E-01	4.775051	0.1497103E-03	1.503726
06072011	04	0.007	0.090	0.004	0.005	0.004	0.002	0.007	0.011	0.061	0.001	0.046	295.804	0.743	0.5828434E-01	4.798904	0.1587703E-03	1.480373
06072011	05	0.005	0.082	0.004	0.005	0.004	0.002	0.005	0.009	0.061	0.001	0.045	295.753	0.740	0.000000	6.836179	0.4528917E-02	0.1788190
06072011	06	0.004	0.067	0.004	0.004	0.003	0.001	0.004	0.008	0.059	0.001	0.043	295.773	0.738	0.1686215E-03	5.296456	0.4022928E-02	0.1194431
06072011	07	0.004	0.045	0.004	0.004	0.003	0.001	0.004	0.007	0.058	0.001	0.042	296.500	0.758	0.7069111E-04	5.415107	0.4079164E-02	0.1230358
06072011	08	0.005	0.027	0.006	0.003	0.003	0.001	0.004	0.007	0.057	0.001	0.039	299.752	0.661	0.3944635E-03	4.769409	0.5441567E-02	-0.5725943E-01
06072011	09	0.003	0.026	0.013	0.002	0.002	0.001	0.003	0.004	0.043	0.001	0.033	302.083	0.582	0.000000	2.221071	0.5116395E-02	-0.3624015
06072011	10	0.001	0.032	0.022	0.001	0.002	0.001	0.002	0.002	0.033	0.001	0.028	304.184	0.517	0.000000	1.458534	0.3475107E-02	-0.3770517
06072011	11	0.001	0.022	0.022	0.000	0.001	0.000	0.001	0.001	0.026	0.001	0.024	306.374	0.453	0.1108646E-04	0.9812499	0.1105926E-02	-0.5194655E-01
06072011	12	0.001	0.014	0.020	0.000	0.001	0.000	0.001	0.001	0.021	0.000	0.020	307.988	0.410	0.5960464E-05	0.6953688	0.8887817E-03	-0.1065799
06072011	13	0.000	0.007	0.016	0.000	0.001	0.000	0.001	0.001	0.018	0.000	0.020	306.804	0.436	0.2026558E-05	0.8111576	0.4518267E-03	0.2541334
06072011	14	0.000	0.003	0.010	0.000	0.000	0.000	0.001	0.001	0.017	0.000	0.018	306.419	0.450	0.2205372E-05	0.7275944	0.4304480E-03	0.2279686
06072011	15	0.001	0.002	0.008	0.001	0.001	0.000	0.001	0.001	0.023	0.000	0.020	307.113	0.426	0.000000	0.7393751	0.1384991E-02	-0.2725820
06072011	16	0.002	0.002	0.005	0.001	0.001	0.000	0.001	0.001	0.026	0.000	0.019	305.158	0.502	0.000000	0.9631111	0.4142743E-02	-0.6336116
06072011	17	0.004	0.001	0.004	0.001	0.001	0.000	0.001	0.001	0.032	0.000	0.019	306.346	0.468	0.1076704E-01	1.058717	0.1970779E-04	1.730142
06072011	18	0.004	0.002	0.005	0.001	0.001	0.000	0.001	0.001	0.038	0.000	0.021	305.676	0.437	0.1037842E-01	1.076475	0.2552830E-04	1.624982
06072011	19	0.007	0.002	0.005	0.001	0.001	0.000	0.001	0.001	0.040	0.000	0.022	303.638	0.461	0.1318860E-01	1.199798	0.3596987E-04	1.523169
06072011	20	0.010	0.002	0.004	0.002	0.001	0.000	0.002	0.001	0.041	0.000	0.023	301.913	0.388	0.1381433E-01	0.9948350	0.3625159E-04	1.438424
06072011	21	0.014	0.003	0.004	0.003	0.002	0.000	0.002	0.001	0.042	0.000	0.024	300.619	0.388	0.1578391E-01	1.059370	0.4582563E-04	1.363939
06072011	22	0.013	0.004	0.005	0.003	0.002	0.000	0.002	0.001	0.043	0.000	0.025	299.531	0.430	0.1775736E-01	1.252029	0.6385415E-04	1.292425
06072011	23	0.011	0.005	0.006	0.002	0.002	0.000	0.002	0.001	0.044	0.000	0.026	298.646	0.492	0.2174181E-01	1.556130	0.9017738E-04	1.236948
06072011	24	0.010	0.006	0.006	0.002	0.002	0.000	0.002	0.001	0.045	0.000	0.026	297.839	0.570	0.2611643E-01	1.958312	0.9891648E-04	1.296613
06082011	01	0.011	0.007	0.005	0.002	0.002	0.001	0.002	0.002	0.045	0.000	0.027	297.104	0.656	0.3569067E-01	2.631711	0.9537612E-04	1.440799
06082011	02	0.013	0.007	0.005	0.002	0.002	0.001	0.003	0.002	0.044	0.000	0.027	296.567	0.717	0.4219651E-01	3.178425	0.1056051E-03	1.478527
06082011	03	0.014	0.007	0.004	0.002	0.002	0.001	0.003	0.002	0.043	0.001	0.027	296.214	0.751	0.4635715E-01	3.537553	0.1121762E-03	1.498802
06082011	04	0.015	0.007	0.004	0.002	0.002	0.001	0.003	0.003	0.042	0.001	0.027	295.927	0.778	0.4897583E-01	3.818325	0.1132875E-03	1.527691
06082011	05	0.017	0.006	0.003	0.002	0.003	0.001	0.003	0.003	0.041	0.001	0.027	295.683	0.803	0.5785501E-01	4.177408	0.1076357E-03	1.588951
06082011	06	0.019	0.006	0.003	0.002	0.003	0.001	0.003	0.003	0.041	0.001	0.027	295.536	0.828	0.6427205E-01	4.827085	0.1132913E-03	1.629488
06082011	07	0.022	0.006	0.005	0.002	0.003	0.001	0.004	0.003	0.040	0.001	0.027	296.468	0.838	0.5309236E-01	5.091618	0.1230609E-03	1.616736
06082011	08	0.017	0.007	0.011	0.001	0.003	0.001	0.004	0.003	0.041	0.001	0.028	298.348	0.782	0.3045893E-01	3.980773	0.1396118E-03	1.455045
06082011	09	0.004	0.030	0.021	0.001	0.003	0.001	0.003	0.003	0.050	0.001	0.034	300.236	0.712	0.1033545E-03	3.813846	0.4510115E-02	-0.7282453E-01
06082011	10	0.002	0.043	0.036	0.000	0.003	0.001	0.002	0.003	0.044	0.001	0.037	302.111	0.636	0.3306866E-03	2.892579	0.5374553E-02	-0.2690570
06082011	11	0.000	0.049	0.050	0.000	0.002	0.000	0.002	0.002	0.036	0.001	0.041	303.776	0.571	0.1394749E-04	2.666289	0.1700199E-02	0.1954074
06082011	12	0.000	0.040	0.045	0.000	0.001	0.000	0.001	0.002	0.029	0.001	0.039	305.300	0.522	0.1251698E-05	2.596302	0.6534795E-02	-0.4008768
06082011	13	0.000	0.025	0.030	0.000	0.001	0.000	0.001	0.001	0.022	0.000	0.031	306.496	0.483	0.3576279E-06	1.944774	0.6312852E-02	-0.5113565
06082011	14	0.000	0.015	0.021	0.000	0.001	0.000	0.001	0.001	0.018	0.000	0.027	306.787	0.474	0.2980232E-06	1.695840	0.6262937E-02	-0.5673932
06082011	15	0.000	0.011	0.016	0.000	0.001	0.000	0.001	0.001	0.016	0.000	0.025	306.161	0.489	0.4768372E-06	1.697202	0.6299160E-02	-0.5695491
06082011	16	0.000	0.017	0.015	0.000	0.001	0.000	0.001	0.001	0.016	0.000	0.025	305.160	0.520	0.7748604E-06	1.851316	0.6382878E-02	-0.5375360
06082011	17	0.000	0.035	0.014	0.000	0.001	0.000	0.001	0.001	0.018	0.000	0.027	303.780	0.565	0.1966953E-05	2.214558	0.6565080E-02	-0.4719530
06082011	18	0.000	0.055	0.013	0.000	0.001	0.000	0.001	0.001	0.020	0.000	0.031	302.318	0.613	0.5662441E-05	3.059332	0.8960193E-02	-0.4666907
06082011	19	0.000	0.062	0.010	0.001	0.001	0.000	0.001	0.001	0.022	0.000	0.037	300.808	0.667	0.000000	4.626659	0.1373703E-01	-0.4726253
06082011	20	0.000	0.056	0.008	0.001	0.001	0.000	0.001	0.001	0.026	0.000	0.051	299.173	0.723	0.000000	8.032953	0.2524056E-01	-0.4972238
06082011	21	0.000	0.052	0.007	0.001	0.001	0.000	0.001	0.001	0.029	0.000	0.068	298.039	0.777	0.2035499E-03	13.92280	0.4147458E-01	-0.4740553
06082011	22	0.000	0.047	0.006	0.001	0.001	0.000	0.001	0.001	0.030	0.000	0.083	297.272	0.816	0.4749298E-03	20.69395	0.5744417E-01	-0.4434026
06082011	23	0.000	0.044	0.004	0.001	0.001	0.000	0.001	0.001	0.031	0.000	0.093	296.644	0.852	0.8958578E-03	27.14045	0.6816193E-01	-0.3999249
06082011	24	0.000	0.050	0.004	0.001	0.001	0.000	0.001	0.001	0.031	0.000	0.093	296.070	0.893	0.2017319E-02	34.83746	0.6940962E-01	-0.2993732
06092011	01	0.000	0.058	0.004	0.000	0.001	0.000	0.001	0.001	0.032	0.000	0.087	295.499	0.941	0.7649720E-02	53.78426	0.6425758E-01	-0.7726922E-01
06092011	02	0.000	0.057	0.003	0.000	0.001	0.000	0.003	0.002	0.043	0.000	0.081	295.003	0.970	0.3672689E-01	92.37548	0.4904789E-01	0.2749364
06092011	03	0.000	0.054	0.003	0.000	0.002	0.000	0.004	0.002	0.054	0.000	0.075	294.713	0.984	0.9566915E-01	125.6881	0.3577673E-01	0.5456935
06092011	04	0.001	0.043	0.003	0.000	0.002	0.000	0.004	0.002	0.063	0.000	0.067	294.497	0.990	0.3253554	232.5714	0.2606064E-01	0.9505712
06092011	05	0.001	0.030	0.003	0.001	0.003	0.000	0.005	0.002	0.074	0.000	0.064	294.345	0.990	0.4198614	222.0714	0.1780476E-01	1.095957
06092011	06	0.002	0.031	0.004	0.000	0.003	0.000	0.006	0.002	0.082	0.000	0.059	294.515	0.981	0.3070207	99.20473	0.9423806E-02	1.022306
06092011	07	0.004	0.035	0.006	0.000	0.004	0.000	0.007	0.002	0.090	0.000	0.058	294.864	0.956	0.2383571	46.55993	0.6608072E-02	0.8479376
06092011	08	0.007	0.074	0.013	0.001	0.004	0.000	0.007	0.002	0.084	0.002	0.050	296.780	0.862	0.7525730E-01	11.42244	0.3955235E-03	1.460587
06092011	09	0.003	0.161	0.025	0.000	0.003	0.000	0.004	0.002	0.053	0.000	0.035	299.036	0.758	0.9799778E-02	4.700448	0.4928029E-02	-0.2053404E-01
06092011	10	0.001	0.157	0.024	0.000	0.002	0.000	0.003	0.001	0.039	0.000	0.031	301.256	0.655	0.2686977E-03	2.658797	0.4690456E-02	-0.2465299
06092011	11	0.001	0.141	0.020	0.000	0.001	0.000	0.002	0.001	0.027	0.000	0.027	303.216	0.571	0.3689528E-04	1.734437	0.1452857E-02	0.7693568E-01
06092011	12	0.001	0.096	0.017	0.000	0.001	0.000	0.002	0.001	0.023	0.000	0.024	305.155	0.491	0.1293421E-04	1.146575	0.8899809E-03	0.1100217
06092011	13	0.001	0.060	0.015	0.000	0.001	0.000	0.001	0.001	0.022	0.000	0.021	306.771	0.433	0.7510185E-05	0.7934620	0.9055525E-03	-0.5738751E-01
06092011	14	0.001	0.046	0.015	0.000	0.001	0.000	0.001	0.001	0.024	0.000	0.021	307.544	0.412	0.8344650E-05	0.7206445	0.1255562E-02	-0.2411170
06092011	15	0.001	0.023	0.014	0.000	0.001	0.000	0.001	0.001	0.024	0.000	0.024	305.063	0.488	0.1215935E-04	1.158388	0.9398948E-03	0.9077498E-01
06092011	16	0.001	0.009	0.010	0.000	0.001	0.000	0.001	0.001	0.027	0.000	0.025	303.707	0.552	0.3242493E-04	1.482772	0.1576241E-02	-0.2654840E-01
06092011	17	0.002	0.007	0.009	0.001	0.001	0.000	0.002	0.001	0.031	0.000	0.023	304.165	0.556	0.000000	1.396384	0.4361048E-02	-0.4945859
06092011	18	0.006	0.011	0.007	0.001	0.001	0.000	0.003	0.001	0.038	0.000	0.023	304.135	0.579	0.1466030E-01	1.733588	0.4353735E-04	1.600084
06092011	19	0.014	0.019	0.007	0.001	0.001	0.000	0.003	0.001	0.037	0.000	0.022	303.518	0.601	0.1524025E-01	1.755469	0.4544025E-04	1.586953
06092011	20	0.023	0.025	0.008	0.001	0.002	0.000	0.004	0.002	0.036	0.000	0.023	302.031	0.567	0.1431108E-01	1.600158	0.5358929E-04	1.475085
06092011	21	0.032	0.031	0.009	0.001	0.002	0.000	0.005	0.002	0.037	0.000	0.025	300.747	0.556	0.1544821E-01	1.683326	0.6906168E-04	1.386931
06092011	22	0.040	0.036	0.010	0.001	0.002	0.001	0.006	0.003	0.037	0.000	0.026	299.675	0.590	0.1670939E-01	1.889359	0.7364406E-04	1.409177
06092011	23	0.046	0.040	0.010	0.001	0.003	0.001	0.007	0.004	0.035	0.001	0.026	298.716	0.647	0.2016675E-01	2.184099	0.8383602E-04	1.415842
06092011	24	0.046	0.040	0.009	0.001	0.003	0.001	0.008	0.004	0.033	0.001	0.027	297.936	0.710	0.2740771E-01	2.784805	0.8247446E-04	1.528475
06102011	01	0.041	0.040	0.009	0.001	0.004	0.001	0.009	0.005	0.031	0.001	0.027	297.242	0.774	0.4090762E-01	3.352219	0.6502619E-04	1.712244
06102011	02	0.028	0.037	0.009	0.001	0.004	0.001	0.008	0.006	0.031	0.001	0.028	296.778	0.808	0.3915960E-01	3.985439	0.9597750E-04	1.618307
06102011	03	0.019	0.035	0.010	0.001	0.004	0.001	0.008	0.007	0.030	0.001	0.028	296.617	0.799	0.2962154E-01	3.625044	0.1113855E-03	1.512485
06102011	04	0.015	0.034	0.010	0.002	0.004	0.001	0.007	0.008	0.027	0.001	0.028	296.428	0.797	0.2823687E-01	3.464206	0.1124241E-03	1.488744
06102011	05	0.015	0.038	0.010	0.002	0.004	0.002	0.007	0.010	0.023	0.001	0.028	296.247	0.800	0.2533048E-01	3.167017	0.9132113E-04	1.540079
06102011	06	0.017	0.044	0.011	0.002	0.004	0.002	0.007	0.011	0.018	0.001	0.027	296.366	0.775	0.2013999E-01	2.602703	0.7555629E-04	1.537154
06102011	07	0.018	0.045	0.015	0.002	0.004	0.002	0.007	0.012	0.014	0.002	0.026	297.262	0.773	0.1578993E-01	2.209743	0.5427041E-04	1.609779
06102011	08	0.017	0.048	0.029	0.001	0.004	0.002	0.007	0.012	0.014	0.002	0.026	299.990	0.701	0.7187843E-02	1.731038	0.5737476E-04	1.479586
06102011	09	0.012	0.147	0.046	0.000	0.004	0.001	0.005	0.008	0.036	0.001	0.031	301.915	0.623	NaN	2.630734	0.2942691E-01	-1.048668
06102011	10	0.001	0.165	0.035	0.000	0.002	0.000	0.002	0.003	0.039	0.000	0.036	303.659	0.544	0.5245209E-04	1.946099	0.2417523E-02	-0.9420557E-01
06102011	11	0.000	0.117	0.029	0.000	0.001	0.000	0.001	0.002	0.030	0.000	0.038	305.018	0.506	0.1132488E-05	2.307781	0.4505615E-02	-0.2905595
06102011	12	0.000	0.062	0.022	0.000	0.000	0.000	0.001	0.001	0.023	0.000	0.041	304.352	0.541	0.2086163E-05	3.725415	0.1685146E-01	-0.6554628
06102011	13	0.000	0.026	0.015	0.000	0.000	0.000	0.000	0.001	0.019	0.000	0.042	303.478	0.611	0.6735325E-05	5.055412	0.2353101E-01	-0.6678841
06102011	14	0.000	0.019	0.011	0.001	0.000	0.000	0.000	0.001	0.018	0.000	0.040	304.022	0.624	0.000000	4.947241	0.2248224E-01	-0.6574766
06102011	15	0.000	0.019	0.011	0.001	0.000	0.000	0.000	0.001	0.019	0.000	0.041	305.916	0.497	0.000000	3.727327	0.2185920E-01	-0.7682368
06102011	16	0.000	0.022	0.013	0.001	0.000	0.000	0.000	0.001	0.018	0.000	0.040	305.924	0.471	0.000000	3.421938	0.2175918E-01	-0.8033704
06102011	17	0.000	0.029	0.014	0.000	0.000	0.000	0.000	0.001	0.018	0.000	0.041	304.790	0.485	0.1132488E-05	3.717557	0.2291228E-01	-0.7898107
06102011	18	0.000	0.039	0.012	0.001	0.000	0.000	0.001	0.001	0.022	0.000	0.041	303.300	0.518	0.000000	3.609671	0.1783000E-01	-0.6936839
06102011	19	0.000	0.049	0.011	0.001	0.000	0.000	0.001	0.001	0.024	0.000	0.041	301.541	0.570	0.000000	3.954139	0.1608445E-01	-0.6093544
06102011	20	0.000	0.058	0.009	0.001	0.001	0.000	0.001	0.001	0.026	0.000	0.041	299.719	0.607	0.000000	4.181162	0.1340566E-01	-0.5059913
06102011	21	0.000	0.072	0.008	0.001	0.001	0.000	0.001	0.001	0.028	0.000	0.041	298.367	0.666	0.000000	4.855945	0.1218912E-01	-0.3996985
06102011	22	0.000	0.081	0.008	0.001	0.001	0.000	0.001	0.001	0.030	0.000	0.040	297.873	0.675	0.000000	4.660811	0.9440294E-02	-0.3065240
06102011	23	0.000	0.082	0.010	0.001	0.001	0.000	0.002	0.001	0.033	0.000	0.039	297.328	0.707	0.000000	4.649787	0.5894712E-02	-0.1030295
06102011	24	0.001	0.083	0.016	0.001	0.001	0.000	0.002	0.001	0.037	0.000	0.038	296.900	0.748	0.000000	5.030452	0.5059260E-02	-0.2479978E-02
06112011	01	0.001	0.088	0.026	0.001	0.002	0.000	0.002	0.001	0.041	0.000	0.037	296.447	0.800	0.000000	6.017672	0.6080846E-02	-0.4535479E-02
06112011	02	0.002	0.090	0.035	0.000	0.002	0.001	0.003	0.002	0.046	0.000	0.036	296.117	0.831	0.4441381E-02	6.476286	0.5459078E-02	0.7420673E-01
06112011	03	0.003	0.090	0.040	0.000	0.003	0.001	0.004	0.003	0.051	0.000	0.035	295.834	0.848	0.2751303E-01	7.154836	0.4419445E-02	0.2092320
06112011	04	0.006	0.090	0.038	0.000	0.003	0.001	0.004	0.003	0.053	0.001	0.035	295.594	0.857	NaN	8.257710	0.2525660E-01	-0.4855153
06112011	05	0.012	0.092	0.032	0.000	0.004	0.001	0.005	0.004	0.049	0.002	0.034	295.351	0.863	NaN	9.031443	0.1341400E-01	-0.1718013
06112011	06	0.015	0.097	0.026	0.000	0.004	0.001	0.006	0.004	0.045	0.002	0.032	295.281	0.861	NaN	9.129009	0.6220079E-02	0.1666277
06112011	07	0.018	0.111	0.031	0.000	0.005	0.001	0.007	0.004	0.042	0.002	0.031	295.767	0.859	NaN	9.537398	0.6710798E-02	0.1526558
06112011	08	0.033	0.168	0.045	0.000	0.005	0.001	0.006	0.004	0.042	0.003	0.030	297.920	0.785	NaN	7.616420	0.6580200E-02	0.6351183E-01
06112011	09	0.047	0.215	0.038	0.000	0.004	0.001	0.004	0.003	0.044	0.002	0.028	300.462	0.688	NaN	4.998639	0.3371548E-03	1.171023
06112011	10	0.039	0.210	0.037	0.000	0.002	0.000	0.002	0.002	0.046	0.001	0.027	303.406	0.569	NaN	3.041131	0.1248588E-02	0.3866160
06112011	11	0.021	0.177	0.044	0.000	0.001	0.000	0.001	0.001	0.047	0.000	0.026	306.077	0.468	NaN	1.839504	0.1934077E-01	-1.021773
06112011	12	0.005	0.082	0.036	0.000	0.000	0.000	0.001	0.001	0.039	0.000	0.022	307.962	0.412	NaN	1.050376	0.3063786E-01	-1.464914
06112011	13	0.001	0.032	0.025	0.000	0.000	0.000	0.001	0.000	0.028	0.000	0.026	307.068	0.425	0.6079674E-05	1.015725	0.7182600E-03	0.1504944
06112011	14	0.000	0.007	0.014	0.000	0.000	0.000	0.000	0.000	0.021	0.000	0.025	305.747	0.495	0.5960464E-06	1.634486	0.4240446E-02	-0.4140304
06112011	15	0.000	0.002	0.008	0.000	0.000	0.000	0.001	0.000	0.021	0.000	0.024	306.621	0.471	0.2384186E-06	1.295471	0.2266805E-02	-0.2429864
06112011	16	0.000	0.002	0.007	0.000	0.000	0.000	0.001	0.000	0.020	0.000	0.023	304.354	0.570	0.2682209E-05	1.750062	0.2672781E-02	-0.1839098
06112011	17	0.000	0.002	0.006	0.000	0.000	0.000	0.001	0.000	0.017	0.000	0.020	302.537	0.675	0.1776218E-04	2.254426	0.3384039E-02	-0.1763993
06112011	18	0.000	0.004	0.006	0.000	0.000	0.000	0.001	0.000	0.016	0.000	0.019	301.533	0.767	0.7581711E-04	3.060344	0.4322760E-02	-0.1499909
06112011	19	0.000	0.016	0.007	0.000	0.000	0.000	0.001	0.001	0.018	0.000	0.024	300.768	0.795	0.1327395E-03	4.393081	0.6782702E-02	-0.1886336
06112011	20	0.000	0.043	0.009	0.001	0.001	0.000	0.001	0.001	0.026	0.000	0.035	299.502	0.747	0.000000	5.260022	0.9166346E-02	-0.2412087
06112011	21	0.001	0.054	0.008	0.001	0.001	0.000	0.001	0.001	0.037	0.000	0.040	298.169	0.764	0.000000	5.617952	0.6114110E-02	-0.3675524E-01
06112011	22	0.001	0.061	0.008	0.001	0.001	0.000	0.002	0.001	0.048	0.000	0.041	297.185	0.790	0.000000	6.305065	0.6289708E-02	0.1059043E-02
06112011	23	0.002	0.064	0.008	0.001	0.002	0.000	0.002	0.002	0.055	0.000	0.040	296.447	0.822	0.000000	6.801470	0.6321588E-02	0.3177663E-01
06112011	24	0.004	0.062	0.008	0.001	0.002	0.001	0.003	0.003	0.057	0.000	0.037	295.876	0.855	0.5621314E-03	8.127447	0.3904234E-02	0.3184184
06122011	01	0.011	0.056	0.007	0.001	0.003	0.001	0.004	0.004	0.049	0.001	0.032	295.363	0.890	0.7528174E-01	8.366129	0.2003712E-03	1.620689
06122011	02	0.013	0.049	0.008	0.001	0.003	0.001	0.005	0.005	0.040	0.001	0.029	294.992	0.910	0.7649022E-01	8.694997	0.1813990E-03	1.680634
06122011	03	0.012	0.045	0.009	0.001	0.003	0.001	0.005	0.005	0.033	0.001	0.027	294.712	0.917	0.6834686E-01	8.902948	0.2023593E-03	1.643411
06122011	04	0.011	0.046	0.012	0.001	0.004	0.001	0.005	0.006	0.029	0.001	0.026	294.484	0.921	0.6614202E-01	8.174138	0.1783382E-03	1.661198
06122011	05	0.012	0.050	0.014	0.001	0.004	0.001	0.005	0.006	0.027	0.002	0.025	294.274	0.924	0.7154238E-01	7.885693	0.1539469E-03	1.709469
06122011	06	0.014	0.052	0.016	0.001	0.004	0.001	0.005	0.007	0.025	0.002	0.025	294.192	0.924	0.8081633E-01	7.611310	0.1241748E-03	1.787426
06122011	07	0.018	0.054	0.021	0.001	0.004	0.001	0.005	0.007	0.025	0.003	0.024	295.097	0.924	0.9159672E-01	7.479438	0.8879934E-04	1.925459
06122011	08	0.018	0.049	0.033	0.001	0.004	0.001	0.005	0.007	0.025	0.003	0.024	297.680	0.833	0.2026254E-01	3.469953	0.1155390E-03	1.477595
06122011	09	0.004	0.215	0.073	0.000	0.004	0.001	0.003	0.005	0.031	0.001	0.025	299.654	0.753	0.1205254E-01	3.989115	0.4583707E-02	-0.6034028E-01
06122011	10	0.002	0.199	0.059	0.000	0.003	0.000	0.002	0.003	0.033	0.000	0.026	301.784	0.666	0.7296205E-03	2.272099	0.4607518E-02	-0.3070399
06122011	11	0.002	0.181	0.054	0.000	0.002	0.000	0.001	0.002	0.037	0.000	0.027	303.598	0.583	0.2216101E-03	1.779478	0.5320896E-02	-0.4756922
06122011	12	0.001	0.055	0.032	0.000	0.001	0.000	0.001	0.001	0.031	0.000	0.030	303.553	0.574	0.3522635E-04	1.951530	0.1589291E-02	0.8917179E-01
06122011	13	0.001	0.006	0.013	0.000	0.000	0.000	0.001	0.001	0.025	0.000	0.024	304.455	0.543	0.2044439E-04	1.361874	0.1161847E-02	0.6898768E-01
06122011	14	0.001	0.001	0.007	0.000	0.000	0.000	0.000	0.001	0.017	0.000	0.014	304.355	0.571	0.2831221E-04	0.8314694	0.1796433E-02	-0.3345648
06122011	15	0.001	0.000	0.004	0.001	0.000	0.000	0.000	0.000	0.014	0.000	0.011	304.153	0.569	0.000000	0.7064694	0.1514196E-02	-0.3310886
06122011	16	0.002	0.001	0.004	0.001	0.000	0.000	0.000	0.000	0.013	0.000	0.010	305.453	0.498	0.000000	0.4840271	0.1906173E-02	-0.5952925
06122011	17	0.002	0.001	0.005	0.001	0.000	0.000	0.000	0.000	0.014	0.000	0.010	304.930	0.508	0.000000	0.5340568	0.2730679E-02	-0.7086833
06122011	18	0.002	0.001	0.004	0.000	0.000	0.000	0.000	0.000	0.015	0.000	0.009	304.061	0.519	0.3033280E-03	0.5813309	0.4798082E-03	0.8335573E-01
06122011	19	0.004	0.001	0.005	0.000	0.000	0.000	0.001	0.000	0.016	0.000	0.009	303.339	0.519	NaN	0.6309012	0.2253264E-02	-0.5528507
06122011	20	0.012	0.002	0.005	0.000	0.000	0.000	0.001	0.001	0.016	0.000	0.009	301.147	0.579	NaN	0.7716774	0.2257682E-03	0.5337729
06122011	21	0.020	0.003	0.005	0.000	0.000	0.000	0.001	0.001	0.016	0.000	0.009	299.463	0.620	NaN	0.8926786	0.1038956E-03	0.9340981
06122011	22	0.023	0.003	0.005	0.000	0.000	0.000	0.001	0.001	0.017	0.000	0.010	298.179	0.668	NaN	1.169779	0.1003916E-03	1.066406
06122011	23	0.022	0.004	0.006	0.000	0.000	0.000	0.001	0.001	0.019	0.000	0.011	297.152	0.724	NaN	1.594164	0.1123443E-03	1.151982
06122011	24	0.021	0.005	0.006	0.000	0.001	0.000	0.001	0.001	0.021	0.000	0.012	296.294	0.786	NaN	2.341291	0.1161819E-03	1.304317
06132011	01	0.019	0.006	0.007	0.000	0.001	0.000	0.001	0.001	0.022	0.000	0.013	295.560	0.852	NaN	3.645160	0.1538271E-03	1.374684
06132011	02	0.019	0.008	0.008	0.000	0.001	0.000	0.002	0.001	0.024	0.000	0.015	295.084	0.888	NaN	5.784958	0.1905018E-03	1.482401
06132011	03	0.018	0.009	0.009	0.000	0.001	0.000	0.002	0.002	0.025	0.000	0.016	294.838	0.897	NaN	6.616620	0.2063633E-03	1.506004
06132011	04	0.017	0.012	0.010	0.000	0.002	0.001	0.002	0.003	0.027	0.001	0.018	294.681	0.896	NaN	7.435440	0.2006345E-03	1.568901
06132011	05	0.017	0.015	0.012	0.000	0.002	0.001	0.003	0.004	0.028	0.001	0.020	294.568	0.893	NaN	7.422209	0.2574906E-03	1.459772
06132011	06	0.018	0.018	0.014	0.001	0.003	0.001	0.004	0.004	0.028	0.001	0.022	294.569	0.886	0.6407678E-01	5.513039	0.1051264E-03	1.719679
06132011	07	0.022	0.022	0.020	0.001	0.003	0.001	0.005	0.005	0.028	0.001	0.023	295.581	0.878	0.5943370E-01	5.133064	0.8712052E-04	1.770256
06132011	08	0.023	0.024	0.034	0.001	0.004	0.001	0.005	0.006	0.028	0.002	0.024	298.714	0.790	0.1913381E-01	3.044054	0.1073515E-03	1.452644
06132011	09	0.011	0.142	0.084	0.000	0.004	0.001	0.004	0.006	0.032	0.001	0.027	300.970	0.695	NaN	3.147248	0.7180388E-01	-1.358217
06132011	10	0.002	0.249	0.081	0.000	0.003	0.001	0.002	0.003	0.032	0.000	0.030	303.211	0.592	0.1477599E-03	1.965027	0.3815678E-02	-0.2882032
06132011	11	0.001	0.142	0.055	0.000	0.001	0.000	0.001	0.002	0.023	0.000	0.023	304.673	0.522	0.1990795E-04	1.168510	0.1244947E-02	-0.2751833E-01
06132011	12	0.001	0.076	0.036	0.000	0.001	0.000	0.001	0.001	0.018	0.000	0.018	306.395	0.461	0.8523464E-05	0.7611516	0.8771964E-03	-0.6162567E-01
06132011	13	0.000	0.038	0.026	0.000	0.001	0.000	0.001	0.001	0.018	0.000	0.018	308.680	0.391	0.2980232E-05	0.5829140	0.5511172E-03	0.2436053E-01
06132011	14	0.000	0.018	0.020	0.000	0.000	0.000	0.001	0.001	0.020	0.000	0.019	309.744	0.360	0.1907349E-05	0.5152978	0.4632629E-03	0.4623073E-01
06132011	15	0.001	0.012	0.017	0.000	0.001	0.000	0.001	0.002	0.023	0.000	0.019	309.229	0.372	0.7688999E-05	0.5080557	0.2030479E-02	-0.6016873
06132011	16	0.002	0.012	0.015	0.000	0.001	0.000	0.001	0.002	0.023	0.000	0.019	308.480	0.401	0.1424551E-04	0.6031998	0.2742532E-02	-0.6576906
06132011	17	0.003	0.012	0.013	0.000	0.001	0.000	0.001	0.002	0.023	0.000	0.017	307.266	0.439	0.1739264E-03	0.7454785	0.4191240E-02	-0.7499074
06132011	18	0.004	0.016	0.009	0.001	0.001	0.000	0.001	0.002	0.022	0.000	0.016	306.003	0.482	0.1114607E-04	0.8470876	0.3972782E-02	-0.6711664
06132011	19	0.006	0.016	0.006	0.001	0.001	0.000	0.001	0.002	0.022	0.000	0.015	304.331	0.560	0.9057045E-02	0.9893565	0.2471626E-04	1.602370
06132011	20	0.008	0.013	0.004	0.002	0.001	0.001	0.002	0.003	0.019	0.000	0.014	302.379	0.601	0.1094991E-01	0.9846795	0.1708955E-04	1.760564
06132011	21	0.008	0.011	0.003	0.002	0.001	0.001	0.002	0.003	0.017	0.000	0.014	301.162	0.608	0.1366603E-01	1.014381	0.1758197E-04	1.761134
06132011	22	0.007	0.009	0.002	0.003	0.001	0.001	0.002	0.004	0.016	0.000	0.014	299.920	0.646	0.1629829E-01	1.042779	0.1659659E-04	1.798173
06132011	23	0.007	0.008	0.002	0.003	0.001	0.001	0.003	0.004	0.014	0.000	0.014	298.782	0.671	0.1826316E-01	1.092605	0.1881445E-04	1.763972
06132011	24	0.009	0.007	0.003	0.003	0.001	0.001	0.003	0.005	0.013	0.000	0.014	297.924	0.701	0.1520705E-01	1.088353	0.1979938E-04	1.740118
06142011	01	0.011	0.007	0.003	0.003	0.002	0.001	0.003	0.005	0.012	0.001	0.015	297.019	0.746	0.1805282E-01	1.448416	0.3013993E-04	1.681751
06142011	02	0.012	0.007	0.004	0.002	0.002	0.001	0.003	0.006	0.011	0.001	0.015	296.372	0.777	0.1722574E-01	1.463537	0.3192885E-04	1.661220
06142011	03	0.013	0.008	0.004	0.002	0.002	0.001	0.004	0.006	0.010	0.001	0.015	295.994	0.789	0.1768309E-01	1.512581	0.3067968E-04	1.692868
06142011	04	0.016	0.009	0.004	0.002	0.002	0.001	0.004	0.007	0.010	0.001	0.015	295.714	0.799	0.1625985E-01	1.406638	0.2686678E-04	1.718967
06142011	05	0.020	0.011	0.005	0.001	0.002	0.001	0.004	0.007	0.009	0.001	0.015	295.489	0.808	0.1799089E-01	1.470975	0.2657754E-04	1.743090
06142011	06	0.026	0.014	0.006	0.001	0.002	0.001	0.004	0.008	0.008	0.001	0.015	295.361	0.816	0.2599758E-01	1.365354	0.1384354E-04	1.993998
06142011	07	0.033	0.016	0.009	0.001	0.002	0.001	0.005	0.008	0.006	0.001	0.015	296.248	0.827	0.3139102E-01	1.439682	0.9320861E-05	2.188811
06142011	08	0.027	0.017	0.014	0.001	0.002	0.001	0.005	0.008	0.006	0.001	0.015	298.858	0.763	0.1101238E-01	1.054239	0.1287662E-04	1.913137
06142011	09	0.016	0.085	0.052	0.000	0.003	0.001	0.003	0.006	0.019	0.002	0.019	301.310	0.660	NaN	2.192341	0.3437867E-01	-1.195381
06142011	10	0.004	0.163	0.056	0.000	0.002	0.001	0.002	0.003	0.032	0.001	0.024	303.730	0.555	0.5072594E-02	1.659430	0.4436155E-02	-0.4270477
06142011	11	0.001	0.128	0.037	0.000	0.001	0.000	0.001	0.002	0.024	0.000	0.021	305.595	0.475	0.1972914E-04	0.8835608	0.1923256E-02	-0.3378007
06142011	12	0.001	0.077	0.026	0.000	0.001	0.000	0.001	0.002	0.020	0.000	0.019	307.414	0.404	0.6556511E-05	0.5906936	0.1103067E-02	-0.2712398
06142011	13	0.001	0.054	0.021	0.000	0.001	0.000	0.001	0.002	0.020	0.000	0.019	309.195	0.344	0.3218651E-05	0.4568726	0.9295148E-03	-0.3084611
06142011	14	0.001	0.045	0.020	0.000	0.001	0.000	0.001	0.002	0.022	0.000	0.021	310.239	0.311	0.2205372E-05	0.4418600	0.7690733E-03	-0.2406831
06142011	15	0.001	0.037	0.018	0.000	0.001	0.000	0.001	0.002	0.025	0.000	0.021	310.206	0.305	0.3755093E-05	0.4350686	0.1495416E-02	-0.5362042
06142011	16	0.002	0.030	0.016	0.000	0.001	0.000	0.001	0.002	0.025	0.000	0.020	309.780	0.314	0.6854534E-05	0.4483232	0.2550622E-02	-0.7550550
06142011	17	0.002	0.020	0.014	0.000	0.001	0.000	0.001	0.002	0.026	0.000	0.020	306.955	0.393	0.2151728E-04	0.6554957	0.3870376E-02	-0.7711834
06142011	18	0.002	0.011	0.009	0.001	0.001	0.000	0.001	0.002	0.026	0.000	0.020	304.495	0.497	0.000000	0.9631111	0.4259920E-02	-0.6457251
06142011	19	0.004	0.010	0.007	0.001	0.001	0.000	0.001	0.002	0.029	0.000	0.020	304.072	0.456	0.000000	0.9968315	0.4214357E-02	-0.6261095
06142011	20	0.007	0.013	0.008	0.002	0.001	0.000	0.002	0.002	0.033	0.000	0.021	302.336	0.478	0.1047212E-01	1.128991	0.4657102E-04	1.384575
06142011	21	0.016	0.017	0.010	0.001	0.001	0.001	0.002	0.003	0.032	0.000	0.021	300.942	0.487	0.1019758E-01	1.155498	0.5165708E-04	1.349640
06142011	22	0.023	0.022	0.013	0.001	0.001	0.001	0.003	0.003	0.031	0.000	0.021	299.894	0.515	0.1002014E-01	1.237121	0.6437190E-04	1.283716
06142011	23	0.028	0.025	0.016	0.001	0.001	0.001	0.003	0.003	0.031	0.001	0.021	298.764	0.587	0.1152688E-01	1.518337	0.9664633E-04	1.196183
06142011	24	0.026	0.025	0.017	0.001	0.001	0.001	0.003	0.003	0.034	0.001	0.022	297.538	0.693	0.1538819E-01	2.181733	0.1207985E-03	1.256740
06152011	01	0.019	0.023	0.015	0.001	0.001	0.001	0.003	0.003	0.038	0.001	0.024	296.413	0.808	0.2705812E-01	3.802511	0.1646816E-03	1.363425
06152011	02	0.010	0.021	0.012	0.001	0.001	0.001	0.003	0.002	0.045	0.001	0.027	295.837	0.861	0.4492670E-01	5.967574	0.2056912E-03	1.462582
06152011	03	0.004	0.020	0.009	0.001	0.002	0.000	0.003	0.002	0.051	0.001	0.029	295.697	0.859	0.5565751E-01	6.432998	0.2081717E-03	1.489992
06152011	04	0.004	0.017	0.007	0.001	0.002	0.000	0.002	0.002	0.052	0.000	0.031	295.448	0.881	0.7926035E-01	7.985527	0.2023586E-03	1.596182
06152011	05	0.004	0.014	0.006	0.001	0.002	0.000	0.002	0.001	0.053	0.000	0.032	295.362	0.888	0.000000	9.247960	0.3830552E-02	0.3827846
06152011	06	0.004	0.011	0.005	0.001	0.002	0.000	0.002	0.001	0.054	0.000	0.032	295.231	0.908	0.000000	11.26105	0.3727802E-02	0.4801262
06152011	07	0.004	0.009	0.004	0.001	0.002	0.000	0.002	0.001	0.058	0.001	0.032	296.386	0.886	0.9919441E-01	9.275334	0.1718990E-03	1.732056
06152011	08	0.004	0.009	0.005	0.001	0.002	0.000	0.002	0.001	0.056	0.001	0.031	298.593	0.838	0.6372732E-01	6.333592	0.1431417E-03	1.645884
06152011	09	0.003	0.025	0.011	0.001	0.003	0.000	0.002	0.001	0.046	0.000	0.031	300.779	0.738	0.000000	3.885745	0.5213296E-02	-0.1276381
06152011	10	0.002	0.074	0.022	0.000	0.003	0.000	0.002	0.001	0.041	0.000	0.033	303.005	0.636	0.2120137E-03	2.661855	0.4917181E-02	-0.2665318
06152011	11	0.002	0.085	0.033	0.000	0.003	0.000	0.002	0.002	0.041	0.000	0.031	305.060	0.549	0.1581311E-03	1.840062	0.5511923E-02	-0.4764707
06152011	12	0.003	0.070	0.041	0.000	0.002	0.000	0.001	0.002	0.039	0.001	0.028	307.087	0.478	0.1199245E-03	1.372915	0.5546641E-02	-0.6063863
06152011	13	0.000	0.024	0.027	0.000	0.001	0.000	0.001	0.001	0.024	0.000	0.032	305.492	0.491	0.5364418E-06	1.979974	0.5348599E-02	-0.4315806
06152011	14	0.000	0.003	0.010	0.000	0.000	0.000	0.001	0.001	0.014	0.000	0.026	306.427	0.458	0.2980232E-06	1.891806	0.1031844E-01	-0.7367374
06152011	15	0.000	0.001	0.005	0.001	0.000	0.000	0.000	0.000	0.014	0.000	0.022	305.772	0.501	0.000000	1.779610	0.8378667E-02	-0.6728501
06152011	16	0.000	0.001	0.003	0.000	0.000	0.000	0.000	0.000	0.013	0.000	0.018	305.412	0.495	0.4172325E-06	1.338320	0.5214494E-02	-0.5906523
06152011	17	0.000	0.000	0.002	0.000	0.000	0.000	0.000	0.000	0.011	0.000	0.015	304.156	0.508	0.4768372E-06	1.135104	0.4200353E-02	-0.5682502
06152011	18	0.001	0.000	0.002	0.000	0.000	0.000	0.000	0.000	0.015	0.000	0.013	303.036	0.591	0.2366304E-04	0.9213605	0.5105505E-03	0.2563909
06152011	19	0.001	0.001	0.002	0.001	0.000	0.000	0.000	0.000	0.018	0.000	0.015	302.281	0.498	0.000000	0.7595621	0.1010783E-02	-0.1240944
06152011	20	0.002	0.003	0.002	0.002	0.001	0.000	0.001	0.000	0.027	0.000	0.018	300.357	0.572	0.000000	1.250382	0.4388582E-02	-0.5452814
06152011	21	0.003	0.003	0.002	0.002	0.001	0.000	0.001	0.001	0.030	0.000	0.020	299.670	0.588	0.000000	1.482723	0.3980476E-02	-0.4288749
06152011	22	0.003	0.003	0.002	0.003	0.001	0.000	0.001	0.001	0.032	0.000	0.021	299.883	0.530	0.000000	1.301711	0.4209380E-02	-0.5097035
06152011	23	0.003	0.002	0.002	0.003	0.001	0.000	0.001	0.001	0.030	0.000	0.020	299.016	0.578	0.000000	1.437133	0.3945743E-02	-0.4386319
06152011	24	0.001	0.001	0.002	0.002	0.001	0.000	0.001	0.001	0.024	0.000	0.022	297.648	0.670	0.000000	2.009238	0.2731064E-02	-0.1333006
06162011	01	0.000	0.001	0.002	0.001	0.001	0.000	0.001	0.000	0.020	0.000	0.025	297.036	0.704	0.000000	3.088687	0.5080305E-02	-0.2161160
06162011	02	0.000	0.002	0.003	0.001	0.001	0.000	0.001	0.001	0.023	0.000	0.030	296.781	0.703	0.000000	3.623045	0.6356186E-02	-0.2441228
06162011	03	0.000	0.008	0.006	0.002	0.001	0.000	0.001	0.001	0.030	0.000	0.033	296.380	0.724	0.000000	3.915880	0.4583840E-02	-0.6840000E-01
06162011	04	0.001	0.015	0.007	0.002	0.003	0.000	0.001	0.001	0.036	0.000	0.036	296.261	0.722	0.000000	4.206153	0.4773478E-02	-0.5494983E-01
06162011	05	0.000	0.013	0.007	0.003	0.002	0.000	0.001	0.001	0.028	0.001	0.032	296.050	0.722	0.000000	3.810713	0.4563590E-02	-0.7830029E-01
06162011	06	0.000	0.009	0.007	0.002	0.002	0.000	0.001	0.001	0.022	0.001	0.032	295.829	0.725	0.000000	4.502028	0.8931268E-02	-0.2975049
06162011	07	0.000	0.009	0.007	0.002	0.002	0.000	0.001	0.002	0.022	0.001	0.028	295.984	0.764	0.000000	3.888809	0.5155887E-02	-0.1224868
06162011	08	0.001	0.011	0.008	0.002	0.002	0.000	0.001	0.002	0.024	0.001	0.026	298.090	0.706	0.000000	2.772993	0.2947022E-02	-0.2643456E-01
06162011	09	0.000	0.014	0.011	0.001	0.002	0.000	0.001	0.002	0.018	0.001	0.020	299.344	0.661	0.000000	1.729637	0.1777517E-02	-0.1185883E-01
06162011	10	0.000	0.008	0.009	0.001	0.001	0.000	0.001	0.001	0.014	0.001	0.016	300.731	0.633	0.000000	1.293322	0.1154717E-02	0.4923128E-01
06162011	11	0.001	0.007	0.009	0.001	0.001	0.000	0.001	0.001	0.014	0.001	0.015	303.051	0.585	0.000000	1.015321	0.1152936E-02	-0.5520185E-01
06162011	12	0.000	0.010	0.012	0.000	0.001	0.000	0.000	0.001	0.011	0.000	0.016	305.156	0.519	0.4768372E-06	1.097578	0.3291289E-02	-0.4769307
06162011	13	0.000	0.008	0.011	0.000	0.000	0.000	0.000	0.000	0.009	0.000	0.018	306.854	0.485	0.4172325E-06	1.604649	0.9313953E-02	-0.7637541
06162011	14	0.000	0.004	0.008	0.000	0.000	0.000	0.000	0.000	0.009	0.000	0.014	305.871	0.497	0.2384186E-06	1.125554	0.5194887E-02	-0.6642097
06162011	15	0.001	0.001	0.005	0.000	0.000	0.000	0.000	0.000	0.011	0.000	0.009	305.145	0.531	0.1144409E-04	0.5023332	0.3214499E-03	0.1938785
06162011	16	0.002	0.001	0.003	0.000	0.000	0.000	0.000	0.000	0.009	0.000	0.005	305.085	0.504	0.1567602E-04	0.3217503	0.1317874E-02	-0.6123549
06162011	17	0.002	0.000	0.002	0.000	0.000	0.000	0.000	0.000	0.007	0.000	0.004	304.527	0.475	0.1132488E-04	0.2430134	0.1148134E-02	-0.6743622
06162011	18	0.006	0.000	0.002	0.000	0.000	0.000	0.000	0.000	0.006	0.000	0.003	303.280	0.463	0.3427267E-04	0.1718213	0.2976567E-03	-0.2386386
06162011	19	0.013	0.000	0.001	0.000	0.000	0.000	0.000	0.000	0.005	0.000	0.003	302.127	0.518	0.1257062E-03	0.2044990	0.1328218E-03	0.1874217
06162011	20	0.019	0.001	0.002	0.000	0.000	0.000	0.000	0.000	0.005	0.000	0.003	300.886	0.563	0.3100634E-03	0.2291826	0.7776180E-04	0.4694153
06162011	21	0.016	0.000	0.002	0.000	0.000	0.000	0.001	0.000	0.004	0.000	0.003	299.697	0.617	NaN	0.3268853	0.3798411E-04	0.9347934
06162011	22	0.009	0.000	0.002	0.000	0.000	0.000	0.000	0.000	0.003	0.000	0.002	299.230	0.635	0.1880527E-03	0.1928640	0.9558936E-04	0.3048417
06162011	23	0.006	0.000	0.001	0.000	0.000	0.000	0.000	0.000	0.002	0.000	0.001	298.761	0.679	0.1080036E-03	0.1092896	0.5651906E-04	0.2863839
06162011	24	0.004	0.000	0.001	0.000	0.000	0.000	0.000	0.000	0.003	0.000	0.001	298.039	0.761	0.1331568E-03	0.1447178	0.6046987E-04	0.3789829
06172011	01	0.002	0.001	0.001	0.000	0.000	0.000	0.000	0.000	0.003	0.000	0.002	297.288	0.858	0.2005696E-03	0.4773270	0.2962009E-03	0.2072295
06172011	02	0.001	0.001	0.001	0.000	0.000	0.000	0.000	0.000	0.005	0.000	0.004	296.824	0.919	0.1673520E-02	1.562500	0.4806345E-03	0.5120052
06172011	03	0.001	0.000	0.001	0.000	0.000	0.000	0.000	0.000	0.006	0.000	0.003	296.623	0.921	0.9035468E-03	1.224490	0.3010631E-03	0.6092977
06172011	04	0.002	0.000	0.001	0.000	0.000	0.000	0.000	0.000	0.005	0.000	0.003	296.453	0.925	0.1149893E-02	1.401869	0.2844043E-03	0.6927713
06172011	05	0.004	0.000	0.001	0.000	0.001	0.000	0.000	0.000	0.004	0.000	0.003	296.456	0.906	0.1704037E-02	1.095658	0.1367691E-03	0.9036871
06172011	06	0.005	0.000	0.001	0.000	0.001	0.000	0.000	0.000	0.003	0.000	0.002	296.490	0.911	0.1874447E-02	0.7320217	0.5413613E-04	1.131037
06172011	07	0.005	0.000	0.001	0.000	0.001	0.000	0.000	0.000	0.003	0.000	0.002	297.599	0.862	0.8121133E-03	0.4892288	0.7014011E-04	0.8435456
06172011	08	0.003	0.002	0.002	0.000	0.000	0.000	0.000	0.000	0.005	0.000	0.003	299.077	0.811	0.2241135E-03	0.5395684	0.3477921E-03	0.1907268
06172011	09	0.000	0.016	0.008	0.000	0.000	0.000	0.000	0.000	0.006	0.000	0.010	300.129	0.772	0.2497435E-04	1.870778	0.4750704E-02	-0.4047357
06172011	10	0.000	0.039	0.021	0.000	0.001	0.000	0.000	0.000	0.009	0.000	0.013	301.047	0.728	0.000000	1.926434	0.4125477E-02	-0.3307201
06172011	11	0.000	0.046	0.025	0.000	0.001	0.000	0.000	0.000	0.010	0.000	0.015	301.911	0.691	0.000000	1.972072	0.4947152E-02	-0.3994325
06172011	12	0.000	0.038	0.023	0.000	0.001	0.000	0.000	0.000	0.010	0.000	0.015	302.395	0.669	0.000000	1.845404	0.4834126E-02	-0.4182265
06172011	13	0.000	0.032	0.020	0.000	0.000	0.000	0.000	0.000	0.010	0.000	0.016	302.440	0.662	0.6139278E-05	2.040774	0.6656528E-02	-0.5134528
06172011	14	0.000	0.030	0.019	0.000	0.000	0.000	0.000	0.000	0.010	0.000	0.019	302.315	0.659	0.7092953E-05	2.581314	0.9824663E-02	-0.5804768
06172011	15	0.000	0.027	0.020	0.000	0.000	0.000	0.000	0.000	0.009	0.000	0.023	302.297	0.657	0.8523464E-05	3.386246	0.1508669E-01	-0.6488754
06172011	16	0.000	0.025	0.022	0.000	0.000	0.000	0.000	0.000	0.010	0.000	0.028	302.163	0.656	0.1043081E-04	4.202936	0.1936180E-01	-0.6633929
06172011	17	0.000	0.025	0.022	0.000	0.000	0.000	0.000	0.001	0.010	0.000	0.028	301.762	0.659	0.1043081E-04	4.022756	0.1838758E-01	-0.6600008
06172011	18	0.000	0.028	0.019	0.000	0.001	0.000	0.000	0.001	0.011	0.000	0.029	301.027	0.674	0.1323223E-04	4.154950	0.1751334E-01	-0.6248031
06172011	19	0.000	0.041	0.013	0.000	0.001	0.000	0.001	0.001	0.012	0.000	0.031	299.993	0.699	0.2402067E-04	4.772195	0.1775669E-01	-0.5706437
06172011	20	0.000	0.059	0.008	0.001	0.001	0.000	0.001	0.001	0.017	0.000	0.036	298.361	0.741	0.000000	6.081520	0.1857842E-01	-0.4849965
06172011	21	0.000	0.063	0.005	0.001	0.001	0.000	0.001	0.001	0.022	0.000	0.039	297.516	0.763	0.000000	6.777586	0.1720337E-01	-0.4045385
06172011	22	0.000	0.053	0.005	0.001	0.002	0.000	0.001	0.002	0.026	0.000	0.037	296.821	0.805	0.000000	7.031851	0.1096788E-01	-0.1930530
06172011	23	0.001	0.042	0.005	0.001	0.002	0.000	0.001	0.002	0.028	0.000	0.030	296.412	0.831	0.000000	5.619040	0.5516596E-02	0.7990991E-02
06172011	24	0.001	0.033	0.004	0.001	0.003	0.001	0.001	0.002	0.029	0.000	0.024	296.744	0.805	0.000000	3.832111	0.3887797E-02	-0.6265533E-02
06182011	01	0.003	0.029	0.004	0.001	0.003	0.001	0.002	0.001	0.029	0.000	0.020	296.386	0.834	0.2724528E-03	4.240581	0.2986745E-02	0.1522272
06182011	02	0.003	0.026	0.003	0.001	0.003	0.001	0.002	0.001	0.030	0.000	0.020	296.104	0.864	0.6625420E-01	4.570969	0.7562593E-04	1.781337
06182011	03	0.003	0.023	0.002	0.001	0.002	0.001	0.002	0.001	0.029	0.000	0.019	295.836	0.891	0.8754259E-01	5.386747	0.6522101E-04	1.916939
06182011	04	0.005	0.021	0.002	0.002	0.002	0.001	0.002	0.002	0.026	0.000	0.017	296.467	0.860	0.5645573E-01	3.604414	0.5059217E-04	1.852751
06182011	05	0.004	0.027	0.005	0.002	0.003	0.001	0.003	0.002	0.023	0.001	0.016	296.422	0.876	0.3714526E-01	3.863443	0.7542826E-04	1.709440
06182011	06	0.003	0.038	0.009	0.001	0.003	0.001	0.003	0.002	0.022	0.001	0.017	296.496	0.886	0.1059771E-03	6.281898	0.3009406E-02	0.3196101
06182011	07	0.003	0.044	0.011	0.001	0.003	0.001	0.003	0.002	0.022	0.001	0.017	297.101	0.896	0.6711483E-04	6.865974	0.3122055E-02	0.3422617
06182011	08	0.003	0.056	0.018	0.001	0.004	0.000	0.003	0.002	0.023	0.001	0.019	299.218	0.826	0.000000	3.385039	0.3081630E-02	0.4078309E-01
06182011	09	0.002	0.083	0.032	0.001	0.004	0.000	0.002	0.002	0.023	0.002	0.020	301.333	0.743	0.000000	2.320140	0.3661552E-02	-0.1981510
06182011	10	0.001	0.092	0.038	0.001	0.003	0.000	0.002	0.001	0.021	0.002	0.021	303.409	0.664	0.000000	1.875914	0.2518981E-02	-0.1280120
06182011	11	0.001	0.085	0.039	0.001	0.002	0.000	0.001	0.001	0.017	0.001	0.020	305.451	0.590	0.000000	1.428732	0.1244329E-02	0.6001570E-01
06182011	12	0.000	0.067	0.031	0.001	0.002	0.000	0.001	0.001	0.014	0.001	0.018	307.212	0.526	0.000000	1.043959	0.7733462E-03	0.1303094
06182011	13	0.000	0.053	0.027	0.001	0.002	0.000	0.001	0.001	0.012	0.001	0.018	307.500	0.487	0.000000	1.041595	0.2248977E-02	-0.3342860
06182011	14	0.000	0.039	0.023	0.001	0.001	0.000	0.001	0.000	0.011	0.001	0.018	308.483	0.447	0.000000	1.172826	0.5178726E-02	-0.6449893
06182011	15	0.000	0.014	0.015	0.001	0.001	0.000	0.000	0.000	0.010	0.000	0.016	306.154	0.537	0.000000	1.384980	0.5367707E-02	-0.5883453
06182011	16	0.001	0.003	0.006	0.001	0.001	0.000	0.000	0.000	0.015	0.000	0.016	305.750	0.518	0.000000	0.9354948	0.7431459E-03	0.9996729E-01
06182011	17	0.002	0.001	0.004	0.001	0.001	0.000	0.001	0.000	0.020	0.000	0.014	305.792	0.473	0.000000	0.6970723	0.3591561E-02	-0.7120054
06182011	18	0.003	0.001	0.003	0.001	0.001	0.000	0.001	0.000	0.024	0.000	0.013	305.011	0.548	0.1180214E-01	0.9611863	0.1611195E-04	1.775660
06182011	19	0.005	0.001	0.002	0.001	0.001	0.000	0.001	0.000	0.026	0.000	0.014	304.015	0.550	0.1634824E-01	1.035425	0.1625377E-04	1.804165
06182011	20	0.008	0.002	0.003	0.001	0.001	0.000	0.001	0.000	0.028	0.000	0.015	301.995	0.562	0.1689124E-01	1.142145	0.2703372E-04	1.625815
06182011	21	0.006	0.002	0.003	0.001	0.001	0.000	0.001	0.000	0.029	0.000	0.016	300.471	0.588	0.2121079E-01	1.329289	0.3523598E-04	1.576633
06182011	22	0.003	0.002	0.003	0.002	0.001	0.000	0.001	0.000	0.031	0.000	0.017	299.223	0.703	0.3014916E-01	1.987097	0.4849231E-04	1.612546
06182011	23	0.003	0.002	0.002	0.003	0.002	0.000	0.001	0.000	0.030	0.000	0.020	298.525	0.758	0.000000	2.808858	0.3783379E-02	-0.1293501
06182011	24	0.001	0.011	0.006	0.004	0.003	0.000	0.001	0.001	0.027	0.000	0.026	300.031	0.680	0.000000	2.543799	0.3120362E-02	-0.8872231E-01
06192011	01	0.000	0.028	0.012	0.005	0.003	0.000	0.001	0.002	0.024	0.001	0.031	299.772	0.720	0.000000	3.672033	0.4460946E-02	-0.8452042E-01
06192011	02	0.001	0.032	0.013	0.005	0.004	0.001	0.002	0.003	0.023	0.001	0.030	299.354	0.766	0.000000	4.131711	0.3696664E-02	0.4831994E-01
06192011	03	0.001	0.033	0.016	0.005	0.004	0.001	0.002	0.003	0.021	0.001	0.025	299.014	0.788	0.000000	3.607506	0.3454701E-02	0.1879659E-01
06192011	04	0.002	0.028	0.015	0.004	0.004	0.001	0.002	0.003	0.021	0.002	0.022	298.570	0.799	0.000000	3.166970	0.3337767E-02	-0.2281203E-01
06192011	05	0.002	0.022	0.014	0.003	0.004	0.001	0.002	0.003	0.023	0.002	0.020	298.240	0.827	0.000000	3.432791	0.2867796E-02	0.7809912E-01
06192011	06	0.003	0.020	0.014	0.003	0.004	0.001	0.002	0.003	0.023	0.002	0.019	297.928	0.862	0.5549192E-04	4.821536	0.3124865E-02	0.1883541
06192011	07	0.003	0.020	0.016	0.002	0.004	0.001	0.002	0.002	0.023	0.002	0.018	298.465	0.876	0.5877018E-04	5.537567	0.3178890E-02	0.2410435
06192011	08	0.003	0.022	0.020	0.002	0.004	0.000	0.002	0.002	0.025	0.002	0.018	300.478	0.808	0.1412559E-01	2.916525	0.1114344E-03	1.417846
06192011	09	0.003	0.028	0.027	0.002	0.003	0.000	0.002	0.002	0.025	0.002	0.018	302.103	0.733	0.2312660E-04	2.355789	0.3726720E-02	-0.1991905
06192011	10	0.003	0.032	0.028	0.002	0.003	0.000	0.001	0.001	0.024	0.002	0.018	303.763	0.658	0.000000	1.687704	0.3970341E-02	-0.3715314
06192011	11	0.002	0.041	0.027	0.001	0.003	0.000	0.001	0.001	0.023	0.001	0.019	305.543	0.583	0.000000	1.263715	0.3781891E-02	-0.4760599
06192011	12	0.001	0.055	0.029	0.001	0.002	0.000	0.001	0.001	0.019	0.001	0.019	307.601	0.495	0.000000	0.9552224	0.1318587E-02	-0.1400045
06192011	13	0.000	0.045	0.027	0.001	0.001	0.000	0.001	0.001	0.017	0.001	0.018	308.683	0.439	0.000000	0.7196013	0.5794583E-03	0.9406976E-01
06192011	14	0.000	0.037	0.023	0.001	0.001	0.000	0.001	0.000	0.016	0.001	0.019	309.008	0.396	0.000000	0.7655668	0.1137579E-02	-0.1719986
06192011	15	0.000	0.027	0.017	0.000	0.001	0.000	0.001	0.000	0.016	0.000	0.020	308.813	0.402	0.1192093E-06	0.8729782	0.2109256E-02	-0.3831259
06192011	16	0.000	0.015	0.012	0.001	0.001	0.000	0.000	0.000	0.017	0.000	0.021	308.450	0.377	0.000000	0.9074026	0.3090767E-02	-0.5322662
06192011	17	0.000	0.009	0.008	0.001	0.001	0.000	0.001	0.001	0.021	0.000	0.021	308.859	0.361	0.000000	0.6013797	0.4516878E-03	0.1243104
06192011	18	0.001	0.007	0.006	0.001	0.001	0.000	0.001	0.001	0.024	0.000	0.020	308.128	0.392	0.000000	0.6251846	0.1512159E-02	-0.3835892
06192011	19	0.003	0.007	0.005	0.001	0.001	0.000	0.001	0.001	0.028	0.000	0.020	306.374	0.405	0.000000	0.7842745	0.4571280E-02	-0.7655696
06192011	20	0.004	0.010	0.003	0.002	0.001	0.000	0.001	0.001	0.032	0.000	0.021	303.691	0.453	0.000000	1.047267	0.4513120E-02	-0.6344195
06192011	21	0.004	0.010	0.003	0.003	0.002	0.000	0.001	0.001	0.033	0.000	0.022	303.153	0.451	0.000000	1.121271	0.4520868E-02	-0.6055114
06192011	22	0.002	0.008	0.004	0.003	0.002	0.000	0.001	0.001	0.031	0.000	0.023	302.358	0.515	0.000000	1.256712	0.5640776E-02	-0.6521031
06192011	23	0.001	0.009	0.006	0.003	0.002	0.000	0.001	0.001	0.027	0.000	0.025	300.442	0.642	0.000000	2.074067	0.2637986E-02	-0.1044497
06192011	24	0.001	0.011	0.008	0.002	0.002	0.000	0.001	0.002	0.025	0.000	0.028	299.875	0.686	0.000000	2.797789	0.2656833E-02	0.2245072E-01
06202011	01	0.001	0.014	0.007	0.003	0.002	0.000	0.001	0.002	0.025	0.001	0.028	299.368	0.746	0.000000	3.568522	0.3614276E-02	-0.5532885E-02
06202011	02	0.001	0.029	0.011	0.003	0.003	0.000	0.001	0.002	0.021	0.001	0.022	299.043	0.784	0.000000	3.076070	0.3449978E-02	-0.4982006E-01
06202011	03	0.001	0.039	0.013	0.002	0.002	0.000	0.001	0.002	0.015	0.001	0.016	298.827	0.800	0.000000	2.343887	0.2744059E-02	-0.6845670E-01
06202011	04	0.001	0.040	0.013	0.002	0.002	0.000	0.001	0.002	0.012	0.001	0.014	298.616	0.812	0.000000	2.128968	0.2419645E-02	-0.5558242E-01
06202011	05	0.002	0.036	0.012	0.002	0.003	0.000	0.001	0.002	0.011	0.001	0.012	298.370	0.828	0.000000	1.947991	0.2262853E-02	-0.6506944E-01
06202011	06	0.002	0.031	0.011	0.003	0.003	0.001	0.001	0.003	0.011	0.001	0.011	298.091	0.847	0.2717972E-04	3.187842	0.2588430E-02	0.9046040E-01
06202011	07	0.003	0.028	0.010	0.003	0.004	0.001	0.001	0.003	0.010	0.001	0.011	298.641	0.848	0.1260686E-01	1.858391	0.4732979E-04	1.594003
06202011	08	0.004	0.037	0.014	0.003	0.004	0.001	0.001	0.003	0.008	0.002	0.010	300.580	0.766	0.6186008E-02	1.161766	0.3302278E-04	1.546305
06202011	09	0.003	0.068	0.026	0.002	0.003	0.000	0.001	0.002	0.009	0.001	0.009	302.248	0.700	0.3663838E-02	0.8555247	0.4105634E-04	1.318852
06202011	10	0.001	0.078	0.034	0.001	0.002	0.000	0.001	0.001	0.009	0.001	0.009	303.916	0.632	0.000000	0.6716771	0.2100395E-02	-0.4951405
06202011	11	0.000	0.052	0.029	0.001	0.001	0.000	0.000	0.001	0.008	0.001	0.010	304.367	0.598	0.000000	0.7004978	0.8236961E-03	-0.7036021E-01
06202011	12	0.000	0.037	0.025	0.001	0.001	0.000	0.000	0.001	0.008	0.001	0.012	305.976	0.531	0.000000	0.8162857	0.2266307E-02	-0.4434766
06202011	13	0.000	0.024	0.021	0.000	0.001	0.000	0.000	0.001	0.008	0.001	0.013	307.633	0.478	0.1788139E-06	0.8243850	0.3190520E-02	-0.5877314
06202011	14	0.000	0.014	0.017	0.000	0.001	0.000	0.000	0.000	0.008	0.000	0.015	307.743	0.483	0.000000	1.198450	0.6261353E-02	-0.7180483
06202011	15	0.000	0.006	0.012	0.000	0.000	0.000	0.000	0.000	0.008	0.000	0.013	305.986	0.510	0.2980232E-06	1.101375	0.5203062E-02	-0.6743237
06202011	16	0.000	0.002	0.007	0.000	0.000	0.000	0.000	0.000	0.010	0.000	0.011	306.245	0.476	0.1788139E-06	0.6180282	0.1085648E-02	-0.2446806
06202011	17	0.001	0.001	0.004	0.000	0.000	0.000	0.000	0.000	0.012	0.000	0.009	305.260	0.490	0.9834766E-05	0.4243638	0.5000068E-03	-0.7123761E-01
06202011	18	0.003	0.001	0.002	0.000	0.000	0.000	0.001	0.000	0.014	0.000	0.008	303.805	0.675	NaN	0.8587042	0.9991939E-03	-0.6580615E-01
06202011	19	0.003	0.000	0.001	0.001	0.000	0.000	0.001	0.000	0.012	0.000	0.007	302.350	0.614	0.1366407E-01	0.5975645	0.7110588E-05	1.924479
06202011	20	0.001	0.000	0.001	0.001	0.000	0.000	0.001	0.000	0.010	0.000	0.006	300.053	0.669	0.9477139E-05	0.6186138	0.1894589E-02	-0.4860955
06202011	21	0.001	0.000	0.001	0.001	0.001	0.000	0.000	0.000	0.008	0.000	0.005	299.011	0.701	0.1249909E-03	0.6010754	0.1055244E-02	-0.2444240
06202011	22	0.001	0.000	0.001	0.001	0.001	0.000	0.000	0.000	0.005	0.000	0.005	298.357	0.749	0.000000	0.6690566	0.1395415E-02	-0.3192406
06202011	23	0.001	0.001	0.001	0.001	0.001	0.000	0.000	0.000	0.006	0.000	0.006	297.759	0.797	0.000000	1.011638	0.1537786E-02	-0.1818707
06202011	24	0.001	0.002	0.001	0.002	0.001	0.000	0.000	0.000	0.009	0.000	0.008	297.290	0.832	0.000000	1.554861	0.1971736E-02	-0.1031571
06212011	01	0.001	0.004	0.001	0.003	0.002	0.000	0.001	0.001	0.011	0.000	0.010	296.957	0.842	0.000000	1.834484	0.2069839E-02	-0.5242264E-01
06212011	02	0.002	0.009	0.002	0.002	0.003	0.000	0.001	0.001	0.010	0.000	0.009	296.930	0.833	0.000000	1.625401	0.1743810E-02	-0.3053866E-01
06212011	03	0.003	0.009	0.002	0.002	0.003	0.000	0.001	0.001	0.008	0.000	0.007	296.956	0.838	0.2082151E-01	1.295187	0.2057188E-04	1.799058
06212011	04	0.003	0.009	0.001	0.002	0.003	0.000	0.001	0.001	0.007	0.000	0.007	297.032	0.843	0.2595669E-01	1.295187	0.1568521E-04	1.916842
06212011	05	0.004	0.009	0.001	0.002	0.003	0.000	0.001	0.001	0.005	0.000	0.006	297.075	0.861	0.2312106E-01	1.217450	0.1346818E-04	1.956142
06212011	06	0.004	0.010	0.001	0.002	0.003	0.000	0.001	0.001	0.005	0.000	0.006	297.126	0.885	0.2651966E-01	1.511009	0.1464775E-04	2.013496
06212011	07	0.005	0.013	0.001	0.001	0.003	0.000	0.001	0.001	0.004	0.000	0.006	297.958	0.895	0.3071606E-01	1.648457	0.1260623E-04	2.116492
06212011	08	0.005	0.019	0.002	0.002	0.002	0.000	0.001	0.001	0.004	0.000	0.006	299.652	0.849	0.1555562E-01	1.132776	0.1314698E-04	1.935318
06212011	09	0.002	0.037	0.005	0.001	0.002	0.000	0.001	0.001	0.006	0.000	0.006	301.169	0.786	0.8142829E-02	0.8406903	0.1473288E-04	1.756348
06212011	10	0.001	0.043	0.008	0.001	0.001	0.000	0.001	0.001	0.005	0.000	0.006	302.444	0.730	0.000000	0.5951527	0.1437895E-02	-0.3830989
06212011	11	0.000	0.026	0.007	0.001	0.001	0.000	0.000	0.000	0.004	0.000	0.007	302.200	0.718	0.000000	1.041399	0.2604990E-02	-0.3981891
06212011	12	0.000	0.006	0.004	0.000	0.000	0.000	0.000	0.000	0.004	0.000	0.008	302.352	0.709	0.6020069E-05	1.280864	0.4421475E-02	-0.5380640
06212011	13	0.000	0.002	0.003	0.000	0.000	0.000	0.000	0.000	0.005	0.000	0.007	303.147	0.680	0.3695488E-05	0.8949569	0.2305063E-02	-0.4108807
06212011	14	0.000	0.001	0.002	0.000	0.000	0.000	0.000	0.000	0.006	0.000	0.007	303.033	0.679	0.5066395E-05	0.8097973	0.1350024E-02	-0.2219653
06212011	15	0.000	0.001	0.002	0.000	0.000	0.000	0.000	0.000	0.005	0.000	0.007	302.332	0.696	0.5543232E-05	0.9567358	0.2356010E-02	-0.3913850
06212011	16	0.000	0.002	0.002	0.000	0.000	0.000	0.000	0.000	0.004	0.000	0.007	301.640	0.711	0.6020069E-05	1.077199	0.3379125E-02	-0.4965085
06212011	17	0.000	0.003	0.002	0.000	0.000	0.000	0.000	0.000	0.003	0.000	0.008	301.030	0.723	0.7569790E-05	1.410103	0.5475818E-02	-0.5891982
06212011	18	0.000	0.005	0.002	0.000	0.000	0.000	0.000	0.000	0.004	0.000	0.010	300.423	0.733	0.1144409E-04	1.796011	0.6626934E-02	-0.5670035
06212011	19	0.000	0.009	0.002	0.000	0.000	0.000	0.000	0.000	0.006	0.000	0.012	299.672	0.744	0.1811981E-04	2.118990	0.6802457E-02	-0.5065368
06212011	20	0.000	0.011	0.002	0.000	0.000	0.000	0.000	0.000	0.011	0.000	0.014	298.564	0.782	0.6490946E-04	2.482284	0.4442448E-02	-0.2527709
06212011	21	0.001	0.011	0.001	0.000	0.000	0.000	0.001	0.000	0.018	0.000	0.016	297.974	0.806	0.4667640E-03	2.800778	0.2958603E-02	-0.2380798E-01
06212011	22	0.001	0.011	0.002	0.000	0.000	0.000	0.001	0.000	0.022	0.000	0.016	297.528	0.824	0.1076102E-02	2.820611	0.3233003E-02	-0.5926287E-01
06212011	23	0.002	0.011	0.001	0.000	0.001	0.000	0.001	0.000	0.023	0.000	0.016	296.959	0.852	0.3546834E-02	3.453363	0.3184131E-02	0.3525128E-01
06212011	24	0.002	0.008	0.001	0.000	0.001	0.000	0.001	0.000	0.020	0.000	0.015	296.313	0.888	0.4682839E-02	4.323723	0.3046914E-02	0.1519976
06222011	01	0.001	0.008	0.001	0.000	0.001	0.000	0.001	0.000	0.019	0.000	0.014	295.870	0.913	0.6141663E-02	4.888103	0.2912544E-02	0.2248679
06222011	02	0.001	0.009	0.001	0.000	0.002	0.000	0.001	0.000	0.017	0.000	0.014	295.424	0.935	0.1131815E-01	7.422974	0.3024239E-02	0.3899617
06222011	03	0.001	0.011	0.002	0.000	0.002	0.000	0.001	0.000	0.016	0.000	0.013	295.433	0.937	0.1162839E-01	6.876525	0.2810458E-02	0.3885919
06222011	04	0.001	0.013	0.002	0.000	0.003	0.000	0.001	0.000	0.015	0.000	0.014	295.424	0.938	0.9224832E-02	7.483370	0.3120248E-02	0.3799081
06222011	05	0.001	0.016	0.003	0.000	0.003	0.000	0.001	0.000	0.014	0.000	0.018	295.360	0.938	0.4870176E-02	9.900115	0.5562088E-02	0.2504024
06222011	06	0.000	0.013	0.004	0.000	0.003	0.000	0.001	0.001	0.014	0.000	0.020	295.269	0.937	0.4142761E-02	10.65153	0.6789845E-02	0.1955521
06222011	07	0.000	0.011	0.004	0.000	0.003	0.000	0.001	0.001	0.013	0.000	0.022	295.294	0.933	0.2603471E-02	10.53323	0.8922474E-02	0.7207628E-01
06222011	08	0.000	0.011	0.006	0.001	0.002	0.000	0.001	0.001	0.013	0.000	0.024	295.790	0.917	0.000000	10.45450	0.1128467E-01	-0.3318546E-01
06222011	09	0.000	0.015	0.010	0.001	0.002	0.000	0.001	0.001	0.012	0.000	0.027	297.679	0.875	0.000000	8.621285	0.1433791E-01	-0.2209139
06222011	10	0.000	0.027	0.014	0.000	0.001	0.000	0.000	0.001	0.008	0.000	0.024	299.958	0.805	0.8952618E-04	5.564914	0.1592685E-01	-0.4566715
06222011	11	0.000	0.018	0.011	0.000	0.001	0.000	0.000	0.000	0.004	0.000	0.013	299.386	0.812	0.000000	3.163678	0.9147958E-02	-0.4611319
06222011	12	0.000	0.006	0.006	0.000	0.000	0.000	0.000	0.000	0.004	0.000	0.011	300.792	0.801	0.3314018E-04	2.571120	0.7804587E-02	-0.4822276
06222011	13	0.000	0.002	0.004	0.000	0.000	0.000	0.000	0.000	0.003	0.000	0.009	301.573	0.782	0.1823902E-04	1.972441	0.6600996E-02	-0.5246055
06222011	14	0.000	0.001	0.003	0.000	0.000	0.000	0.000	0.000	0.002	0.000	0.008	301.705	0.782	0.1531839E-04	1.814961	0.6525571E-02	-0.5557513
06222011	15	0.000	0.000	0.002	0.000	0.000	0.000	0.000	0.000	0.002	0.000	0.006	301.087	0.800	0.1728535E-04	1.419608	0.4429208E-02	-0.4941575
06222011	16	0.000	0.000	0.002	0.000	0.000	0.000	0.000	0.000	0.002	0.000	0.005	300.235	0.820	0.2235174E-04	1.254181	0.3400273E-02	-0.4331537
06222011	17	0.000	0.000	0.002	0.000	0.000	0.000	0.000	0.000	0.002	0.000	0.004	299.227	0.850	0.3606081E-04	1.119918	0.2388453E-02	-0.3289305
06222011	18	0.000	0.000	0.002	0.000	0.000	0.000	0.000	0.000	0.003	0.000	0.004	298.659	0.882	0.1038313E-03	1.238083	0.1602880E-02	-0.1121513
06222011	19	0.001	0.000	0.002	0.000	0.000	0.000	0.000	0.000	0.006	0.000	0.005	298.070	0.899	0.9165406E-03	1.584448	0.6749646E-03	0.3705970
06222011	20	0.002	0.001	0.002	0.000	0.001	0.000	0.000	0.000	0.009	0.000	0.006	297.343	0.916	0.5239248E-04	2.452367	0.1746690E-02	0.1473697
06222011	21	0.003	0.002	0.002	0.000	0.001	0.000	0.000	0.000	0.010	0.000	0.006	297.005	0.925	0.3567159E-02	2.804835	0.3196673E-03	0.9432091
06222011	22	0.004	0.003	0.002	0.000	0.001	0.000	0.001	0.000	0.010	0.000	0.007	296.866	0.935	NaN	3.882134	0.5962132E-03	0.8136690
06222011	23	0.004	0.003	0.002	0.000	0.002	0.000	0.001	0.000	0.010	0.000	0.007	296.949	0.926	NaN	3.497547	0.4360163E-03	0.9042608
06222011	24	0.003	0.003	0.002	0.000	0.002	0.000	0.001	0.000	0.011	0.000	0.007	296.972	0.936	NaN	4.087086	0.4240490E-03	0.9839977
06232011	01	0.001	0.003	0.001	0.000	0.001	0.000	0.001	0.000	0.012	0.000	0.008	296.847	0.964	0.5412889E-01	6.651419	0.2034036E-02	0.5145557
06232011	02	0.001	0.002	0.001	0.000	0.001	0.000	0.001	0.000	0.012	0.000	0.007	296.915	0.967	NaN	8.052660	0.2667528E-03	1.479830
06232011	03	0.002	0.001	0.001	0.000	0.001	0.000	0.001	0.000	0.012	0.000	0.007	297.002	0.962	NaN	5.878851	0.2631923E-03	1.349019
06232011	04	0.003	0.001	0.001	0.000	0.001	0.000	0.000	0.000	0.012	0.000	0.007	297.050	0.965	0.1732194E-01	8.052660	0.3312195E-03	1.385823
06232011	05	0.003	0.001	0.001	0.000	0.001	0.000	0.000	0.000	0.013	0.000	0.008	297.085	0.968	0.1638049E-01	9.202085	0.4639218E-03	1.297441
06232011	06	0.003	0.003	0.001	0.000	0.002	0.000	0.001	0.000	0.014	0.000	0.008	297.178	0.968	NaN	9.208768	0.2611501E-03	1.547311
06232011	07	0.003	0.006	0.001	0.000	0.003	0.000	0.001	0.000	0.015	0.000	0.009	298.169	0.928	NaN	4.200478	0.2833746E-03	1.170938
06232011	08	0.001	0.020	0.005	0.000	0.002	0.000	0.000	0.000	0.011	0.000	0.009	299.124	0.882	0.000000	2.389226	0.2303883E-02	0.1579689E-01
06232011	09	0.000	0.014	0.006	0.000	0.001	0.000	0.000	0.000	0.004	0.000	0.007	299.477	0.859	0.000000	1.946598	0.3151935E-02	-0.2093009
06232011	10	0.000	0.002	0.005	0.000	0.000	0.000	0.000	0.000	0.004	0.000	0.008	300.365	0.835	0.5459785E-04	2.123899	0.4716206E-02	-0.3464589
06232011	11	0.000	0.000	0.004	0.000	0.000	0.000	0.000	0.000	0.004	0.000	0.009	301.013	0.800	0.2837181E-04	2.034927	0.5669969E-02	-0.4450319
06232011	12	0.000	0.000	0.003	0.000	0.000	0.000	0.000	0.000	0.005	0.000	0.009	301.976	0.754	0.1341105E-04	1.599867	0.4561881E-02	-0.4550601
06232011	13	0.000	0.000	0.003	0.000	0.000	0.000	0.000	0.000	0.005	0.000	0.008	302.370	0.718	0.7748604E-05	1.234411	0.3438354E-02	-0.4448906
06232011	14	0.000	0.000	0.003	0.000	0.000	0.000	0.000	0.000	0.006	0.000	0.007	302.442	0.705	0.8702278E-05	0.9029667	0.1442795E-02	-0.2035330
06232011	15	0.001	0.000	0.003	0.000	0.000	0.000	0.000	0.000	0.007	0.000	0.007	302.394	0.693	0.2592802E-04	0.7339079	0.4704104E-03	0.1931646
06232011	16	0.001	0.000	0.004	0.000	0.000	0.000	0.000	0.000	0.008	0.000	0.008	302.349	0.683	0.2461672E-04	0.8094420	0.5093262E-03	0.2011897
06232011	17	0.001	0.001	0.004	0.000	0.000	0.000	0.000	0.000	0.010	0.000	0.009	301.748	0.701	0.5131960E-04	0.9672423	0.6918359E-03	0.1455322
06232011	18	0.001	0.002	0.004	0.001	0.000	0.000	0.000	0.000	0.013	0.000	0.012	301.195	0.715	0.000000	1.412375	0.1763660E-02	-0.9646500E-01
06232011	19	0.002	0.002	0.002	0.001	0.000	0.000	0.001	0.001	0.021	0.000	0.014	301.145	0.755	0.000000	1.816235	0.3180818E-02	-0.2433668
06232011	20	0.003	0.004	0.002	0.001	0.001	0.000	0.001	0.001	0.028	0.000	0.016	299.211	0.773	0.3959775E-01	2.264610	0.3620477E-04	1.796228
06232011	21	0.005	0.005	0.002	0.002	0.001	0.000	0.001	0.001	0.033	0.000	0.018	298.322	0.760	0.4380596E-01	2.465811	0.4825288E-04	1.708436
06232011	22	0.005	0.007	0.002	0.002	0.001	0.000	0.001	0.001	0.035	0.000	0.019	297.626	0.779	0.5001378E-01	2.831207	0.5392273E-04	1.720200
06232011	23	0.005	0.007	0.002	0.002	0.001	0.000	0.001	0.001	0.035	0.000	0.020	296.934	0.817	0.6187117E-01	3.595429	0.6436187E-04	1.747122
06232011	24	0.004	0.006	0.002	0.002	0.002	0.000	0.001	0.001	0.033	0.000	0.019	296.341	0.869	0.7314688E-01	4.613736	0.6998904E-04	1.819023
06242011	01	0.004	0.004	0.001	0.002	0.003	0.000	0.001	0.001	0.032	0.000	0.019	295.864	0.905	0.1136473	6.549116	0.6574851E-04	1.998297
06242011	02	0.004	0.003	0.001	0.001	0.003	0.000	0.001	0.001	0.029	0.000	0.018	295.544	0.933	0.1453326	7.938796	0.6117902E-04	2.113152
06242011	03	0.004	0.003	0.001	0.001	0.004	0.000	0.001	0.001	0.026	0.000	0.017	295.386	0.946	0.1727344	10.58298	0.7062130E-04	2.175673
06242011	04	0.004	0.003	0.001	0.001	0.005	0.000	0.001	0.002	0.024	0.000	0.017	295.250	0.953	0.1635662	9.918555	0.6733911E-04	2.168181
06242011	05	0.004	0.003	0.001	0.001	0.006	0.000	0.001	0.002	0.023	0.000	0.017	295.117	0.955	0.1924545	12.60154	0.8033618E-04	2.195513
06242011	06	0.006	0.004	0.001	0.001	0.006	0.000	0.001	0.002	0.021	0.000	0.017	294.973	0.954	0.1653010	9.916376	0.6895583E-04	2.157782
06242011	07	0.008	0.005	0.002	0.001	0.006	0.000	0.001	0.002	0.020	0.000	0.017	295.799	0.954	0.1270438	9.916376	0.8428856E-04	2.070584
06242011	08	0.006	0.013	0.007	0.002	0.006	0.000	0.001	0.003	0.022	0.001	0.017	297.991	0.872	0.2944583E-01	3.634765	0.8710344E-04	1.620441
06242011	09	0.002	0.024	0.014	0.001	0.004	0.000	0.001	0.002	0.021	0.001	0.018	299.695	0.809	0.000000	2.826283	0.3286701E-02	-0.6554449E-01
06242011	10	0.001	0.031	0.019	0.000	0.002	0.000	0.001	0.001	0.016	0.000	0.020	301.456	0.734	0.7909536E-04	2.426974	0.2539464E-02	-0.1967703E-01
06242011	11	0.000	0.030	0.019	0.000	0.001	0.000	0.001	0.001	0.015	0.000	0.020	303.256	0.664	0.1126528E-04	2.016584	0.3147439E-02	-0.1933409
06242011	12	0.000	0.028	0.018	0.000	0.001	0.000	0.001	0.001	0.015	0.000	0.019	304.926	0.583	0.3039837E-05	1.381567	0.1739128E-02	-0.9995963E-01
06242011	13	0.000	0.026	0.017	0.000	0.001	0.000	0.001	0.001	0.016	0.000	0.018	306.402	0.541	0.6258488E-05	1.055188	0.8179250E-03	0.1106164
06242011	14	0.000	0.013	0.012	0.000	0.001	0.000	0.001	0.001	0.015	0.000	0.019	304.422	0.609	0.5304813E-05	1.534029	0.1934623E-02	-0.1007627
06242011	15	0.000	0.004	0.007	0.001	0.000	0.000	0.001	0.001	0.015	0.000	0.017	303.428	0.625	0.000000	1.382975	0.1375534E-02	0.2343009E-02
06242011	16	0.001	0.003	0.005	0.001	0.000	0.000	0.001	0.001	0.016	0.000	0.016	302.851	0.635	0.000000	1.278853	0.1422210E-02	-0.4614305E-01
06242011	17	0.001	0.002	0.004	0.001	0.000	0.000	0.001	0.001	0.018	0.000	0.016	302.587	0.653	0.000000	1.295321	0.1945353E-02	-0.1766210
06242011	18	0.002	0.002	0.003	0.002	0.000	0.000	0.001	0.001	0.022	0.000	0.017	301.598	0.672	0.000000	1.463449	0.3350164E-02	-0.3596884
06242011	19	0.003	0.002	0.004	0.002	0.001	0.000	0.001	0.001	0.028	0.000	0.019	300.484	0.653	0.000000	1.696515	0.3850249E-02	-0.3559311
06242011	20	0.004	0.003	0.004	0.002	0.001	0.000	0.001	0.001	0.030	0.000	0.019	298.465	0.696	0.1355410E-03	2.103782	0.3150188E-02	-0.1753357
06242011	21	0.006	0.003	0.003	0.003	0.001	0.000	0.001	0.002	0.029	0.000	0.018	297.871	0.640	0.2602285E-01	1.542573	0.5103241E-04	1.480400
06242011	22	0.010	0.003	0.003	0.003	0.001	0.000	0.002	0.002	0.026	0.000	0.017	297.199	0.675	0.2682078E-01	1.625938	0.4871954E-04	1.523401
06242011	23	0.013	0.004	0.004	0.003	0.001	0.000	0.002	0.002	0.024	0.000	0.016	296.854	0.700	0.2398205E-01	1.622826	0.5538420E-04	1.466886
06242011	24	0.015	0.005	0.006	0.003	0.001	0.001	0.002	0.002	0.023	0.001	0.016	296.369	0.746	0.2172643E-01	2.000150	0.6935352E-04	1.459994
06252011	01	0.018	0.008	0.008	0.002	0.001	0.001	0.002	0.003	0.021	0.001	0.016	295.794	0.815	0.2327472E-01	2.490629	0.8058851E-04	1.490036
06252011	02	0.020	0.015	0.009	0.002	0.002	0.001	0.003	0.004	0.017	0.001	0.016	295.355	0.865	0.3283042E-01	3.098724	0.6534962E-04	1.675940
06252011	03	0.021	0.023	0.010	0.001	0.002	0.001	0.003	0.006	0.014	0.001	0.016	295.109	0.884	0.3761965E-01	2.806877	0.4252001E-04	1.819630
06252011	04	0.023	0.028	0.010	0.001	0.002	0.001	0.003	0.007	0.013	0.002	0.016	294.945	0.894	0.4697096E-01	2.783847	0.3039719E-04	1.961812
06252011	05	0.025	0.030	0.010	0.001	0.002	0.001	0.004	0.007	0.013	0.002	0.016	294.811	0.903	0.6523138E-01	3.091247	0.2340128E-04	2.120894
06252011	06	0.024	0.025	0.008	0.002	0.002	0.001	0.003	0.006	0.015	0.002	0.016	294.748	0.914	0.6979871E-01	3.771787	0.3370896E-04	2.048802
06252011	07	0.022	0.016	0.007	0.001	0.002	0.001	0.003	0.005	0.017	0.001	0.016	295.775	0.914	0.5456811E-01	4.037588	0.4546097E-04	1.948483
06252011	08	0.012	0.011	0.010	0.001	0.002	0.001	0.002	0.004	0.019	0.001	0.016	297.705	0.857	0.2099419E-01	2.888423	0.7133258E-04	1.607373
06252011	09	0.008	0.023	0.023	0.000	0.002	0.001	0.002	0.003	0.017	0.001	0.014	299.520	0.784	NaN	2.561616	0.1134888E-01	-0.6464390
06252011	10	0.008	0.025	0.025	0.000	0.002	0.000	0.001	0.002	0.016	0.001	0.012	301.422	0.707	NaN	1.638200	0.1685164E-01	-1.012275
06252011	11	0.007	0.026	0.023	0.000	0.001	0.000	0.001	0.002	0.016	0.001	0.011	303.178	0.638	NaN	1.161297	0.1528185E-01	-1.119233
06252011	12	0.006	0.031	0.023	0.000	0.001	0.000	0.001	0.002	0.019	0.000	0.012	304.700	0.579	NaN	1.027894	0.1416288E-01	-1.139203
06252011	13	0.005	0.031	0.023	0.000	0.001	0.000	0.001	0.002	0.021	0.000	0.013	306.310	0.528	NaN	0.9168743	0.1511232E-01	-1.217021
06252011	14	0.002	0.011	0.022	0.000	0.001	0.000	0.001	0.002	0.022	0.000	0.018	305.438	0.549	0.7206202E-04	0.9898990	0.3501902E-02	-0.5487131
06252011	15	0.002	0.001	0.014	0.000	0.000	0.000	0.001	0.002	0.019	0.001	0.016	304.821	0.575	0.5912781E-04	0.8853887	0.2857265E-02	-0.5088165
06252011	16	0.002	0.000	0.009	0.000	0.000	0.000	0.001	0.002	0.015	0.001	0.012	304.017	0.589	0.2307296E-03	0.7472188	0.2922995E-02	-0.5923802
06252011	17	0.004	0.001	0.010	0.000	0.000	0.000	0.001	0.002	0.015	0.001	0.011	303.788	0.591	0.7569551E-02	1.061249	0.3580167E-02	-0.5280859
06252011	18	0.007	0.002	0.011	0.000	0.001	0.000	0.001	0.002	0.016	0.001	0.012	303.275	0.600	NaN	1.015158	0.5513194E-02	-0.7348699
06252011	19	0.010	0.003	0.010	0.001	0.001	0.000	0.001	0.003	0.016	0.001	0.013	302.268	0.645	0.7254064E-02	0.9943522	0.3487703E-04	1.455001
06252011	20	0.014	0.004	0.007	0.001	0.001	0.001	0.002	0.004	0.015	0.001	0.013	300.586	0.688	0.9068191E-02	1.067935	0.2397299E-04	1.648823
06252011	21	0.019	0.005	0.006	0.001	0.002	0.001	0.002	0.005	0.014	0.001	0.014	299.453	0.709	0.1086199E-01	1.155975	0.2667678E-04	1.636815
06252011	22	0.021	0.008	0.007	0.002	0.002	0.001	0.003	0.005	0.014	0.001	0.015	298.653	0.743	0.1269490E-01	1.398704	0.3631631E-04	1.585624
06252011	23	0.019	0.011	0.008	0.002	0.002	0.001	0.003	0.005	0.014	0.001	0.016	298.101	0.781	0.1485354E-01	1.777509	0.4626746E-04	1.584536
06252011	24	0.012	0.010	0.007	0.002	0.002	0.001	0.003	0.005	0.016	0.001	0.016	297.678	0.844	0.1972735E-01	2.346762	0.5045848E-04	1.667535
06262011	01	0.007	0.005	0.004	0.002	0.002	0.001	0.003	0.003	0.018	0.001	0.015	297.305	0.893	0.3457332E-01	3.578761	0.5417878E-04	1.819903
06262011	02	0.004	0.002	0.002	0.001	0.002	0.000	0.002	0.002	0.018	0.000	0.014	297.067	0.921	0.6882614E-01	4.885675	0.4496767E-04	2.036024
06262011	03	0.003	0.001	0.001	0.001	0.002	0.000	0.001	0.001	0.018	0.000	0.013	296.989	0.923	0.000000	4.895205	0.2424430E-02	0.3051612
06262011	04	0.002	0.001	0.001	0.001	0.001	0.000	0.001	0.001	0.016	0.000	0.012	296.949	0.919	0.000000	4.413501	0.2426322E-02	0.2598347
06262011	05	0.002	0.001	0.001	0.001	0.002	0.000	0.001	0.001	0.016	0.000	0.012	296.894	0.915	0.000000	4.451965	0.2324227E-02	0.2822733
06262011	06	0.002	0.003	0.001	0.001	0.002	0.000	0.001	0.001	0.017	0.000	0.012	296.897	0.905	0.000000	3.998913	0.2278547E-02	0.2442840
06262011	07	0.003	0.007	0.002	0.001	0.002	0.000	0.001	0.001	0.020	0.000	0.012	297.930	0.899	0.5281103E-01	3.608956	0.3695436E-04	1.989716
06262011	08	0.004	0.023	0.005	0.002	0.003	0.000	0.001	0.001	0.020	0.000	0.013	300.291	0.821	0.2247787E-01	2.301482	0.4382054E-04	1.720330
06262011	09	0.001	0.092	0.023	0.001	0.003	0.000	0.001	0.002	0.014	0.001	0.015	301.905	0.754	0.000000	1.733384	0.2624311E-02	-0.1801203
06262011	10	0.000	0.078	0.029	0.000	0.001	0.000	0.001	0.001	0.010	0.000	0.016	303.643	0.672	0.7688999E-05	1.773981	0.3808025E-02	-0.3317508
06262011	11	0.000	0.044	0.023	0.000	0.001	0.000	0.001	0.001	0.011	0.000	0.018	305.266	0.592	0.1907349E-05	1.598150	0.4486497E-02	-0.4482900
06262011	12	0.000	0.012	0.014	0.000	0.000	0.000	0.001	0.001	0.010	0.000	0.015	304.710	0.598	0.1966953E-05	1.327294	0.3447350E-02	-0.4145183
06262011	13	0.000	0.002	0.006	0.000	0.000	0.000	0.000	0.001	0.011	0.000	0.013	305.521	0.557	0.1132488E-05	0.8752759	0.1449279E-02	-0.2190071
06262011	14	0.001	0.001	0.004	0.000	0.000	0.000	0.000	0.001	0.012	0.000	0.011	305.729	0.556	0.1549721E-04	0.6268738	0.1189432E-02	-0.2781594
06262011	15	0.001	0.000	0.003	0.000	0.000	0.000	0.000	0.001	0.011	0.000	0.010	305.123	0.580	0.1883507E-04	0.6027338	0.1281589E-02	-0.3276233
06262011	16	0.001	0.000	0.003	0.000	0.000	0.000	0.000	0.000	0.010	0.000	0.008	304.191	0.611	0.2557039E-04	0.5933891	0.5080342E-03	0.6744662E-01
06262011	17	0.001	0.000	0.002	0.000	0.000	0.000	0.000	0.000	0.008	0.000	0.007	302.021	0.685	0.4303455E-04	0.7143173	0.5530011E-03	0.1111652
06262011	18	0.002	0.001	0.002	0.000	0.000	0.000	0.000	0.000	0.008	0.000	0.006	300.496	0.781	0.4032850E-03	0.8886845	0.5953773E-03	0.1739553
06262011	19	0.002	0.004	0.002	0.001	0.000	0.000	0.001	0.001	0.010	0.000	0.007	299.315	0.845	0.000000	1.778254	0.2238302E-02	-0.9992499E-01
06262011	20	0.002	0.011	0.002	0.001	0.001	0.000	0.001	0.001	0.013	0.000	0.011	297.994	0.860	0.000000	2.306334	0.2350480E-02	-0.8234307E-02
06262011	21	0.001	0.011	0.002	0.001	0.001	0.000	0.001	0.001	0.016	0.000	0.014	297.286	0.877	0.000000	3.456528	0.2812244E-02	0.8958711E-01
06262011	22	0.002	0.008	0.002	0.001	0.001	0.000	0.001	0.001	0.018	0.000	0.015	297.064	0.874	0.000000	3.423274	0.2918618E-02	0.6926434E-01
06262011	23	0.002	0.005	0.002	0.001	0.002	0.000	0.001	0.001	0.019	0.000	0.014	297.051	0.873	0.000000	3.282820	0.2613295E-02	0.9905854E-01
06262011	24	0.003	0.004	0.002	0.002	0.002	0.000	0.002	0.002	0.018	0.000	0.014	297.081	0.852	0.000000	3.134744	0.2556036E-02	0.8863516E-01
06272011	01	0.006	0.003	0.002	0.002	0.002	0.001	0.002	0.003	0.015	0.000	0.013	297.307	0.827	0.3147775E-01	2.035053	0.2669962E-04	1.882071
06272011	02	0.007	0.003	0.002	0.003	0.003	0.001	0.003	0.004	0.009	0.000	0.013	297.462	0.810	0.2391785E-01	1.674466	0.2215006E-04	1.878501
06272011	03	0.005	0.002	0.002	0.004	0.003	0.001	0.003	0.006	0.007	0.000	0.013	297.458	0.825	0.000000	3.831069	0.2921740E-02	0.1176784
06272011	04	0.004	0.002	0.001	0.005	0.003	0.001	0.003	0.006	0.008	0.000	0.013	297.447	0.828	0.000000	3.831069	0.2920003E-02	0.1179368
06272011	05	0.003	0.006	0.001	0.005	0.004	0.001	0.003	0.005	0.010	0.000	0.013	297.357	0.844	0.2399349E-01	1.740975	0.2019438E-04	1.935562
06272011	06	0.003	0.010	0.002	0.004	0.004	0.001	0.002	0.004	0.013	0.001	0.014	297.234	0.853	0.000000	4.084074	0.2798252E-02	0.1642068
06272011	07	0.004	0.013	0.003	0.003	0.004	0.001	0.002	0.003	0.014	0.001	0.013	297.945	0.867	0.2641207E-01	2.596074	0.3954135E-04	1.817266
06272011	08	0.003	0.023	0.007	0.003	0.003	0.001	0.002	0.002	0.014	0.001	0.013	299.979	0.803	0.2741814E-04	2.644357	0.2887362E-02	-0.3818111E-01
06272011	09	0.002	0.056	0.019	0.001	0.002	0.000	0.001	0.002	0.012	0.001	0.012	301.608	0.747	0.000000	1.331219	0.2531689E-02	-0.2791608
06272011	10	0.001	0.071	0.030	0.001	0.002	0.000	0.001	0.001	0.012	0.001	0.013	303.185	0.686	0.000000	1.271202	0.1900621E-02	-0.1746811
06272011	11	0.000	0.070	0.036	0.000	0.001	0.000	0.001	0.001	0.012	0.001	0.015	304.738	0.628	0.1186132E-04	1.249911	0.1198121E-02	0.1837814E-01
06272011	12	0.000	0.049	0.031	0.000	0.001	0.000	0.001	0.001	0.012	0.001	0.016	306.187	0.576	0.2145767E-05	1.167434	0.1622918E-02	-0.1430643
06272011	13	0.000	0.024	0.021	0.000	0.001	0.000	0.000	0.001	0.011	0.000	0.016	306.447	0.559	0.8940697E-06	1.239993	0.3406591E-02	-0.4389008
06272011	14	0.000	0.004	0.009	0.000	0.000	0.000	0.000	0.000	0.009	0.000	0.012	305.928	0.569	0.8344650E-06	1.064512	0.3222224E-02	-0.4810052
06272011	15	0.001	0.001	0.004	0.000	0.000	0.000	0.000	0.000	0.010	0.000	0.009	306.608	0.544	0.8642673E-05	0.5324157	0.1883752E-03	0.4512271
06272011	16	0.002	0.000	0.003	0.000	0.000	0.000	0.000	0.000	0.012	0.000	0.009	307.030	0.504	0.1621246E-04	0.4515718	0.6701482E-03	-0.1714440
06272011	17	0.003	0.000	0.002	0.000	0.000	0.000	0.000	0.000	0.013	0.000	0.008	305.105	0.542	0.5781651E-04	0.5772006	0.1470693E-02	-0.4061951
06272011	18	0.002	0.000	0.001	0.000	0.000	0.000	0.000	0.000	0.013	0.000	0.007	304.037	0.595	0.5674362E-04	0.5998286	0.1387358E-02	-0.3641613
06272011	19	0.005	0.000	0.001	0.000	0.000	0.000	0.000	0.000	0.012	0.000	0.006	302.750	0.606	0.1468658E-03	0.5295675	0.5444172E-03	-0.1201049E-01
06272011	20	0.006	0.000	0.001	0.001	0.000	0.000	0.001	0.000	0.010	0.000	0.006	300.909	0.702	0.1574081E-01	0.6859043	0.7742672E-05	1.947373
06272011	21	0.006	0.000	0.001	0.001	0.001	0.000	0.001	0.000	0.010	0.000	0.006	300.534	0.659	0.1471668E-01	0.6162958	0.7954241E-05	1.889190
06272011	22	0.005	0.000	0.001	0.002	0.001	0.000	0.001	0.000	0.008	0.000	0.005	299.889	0.723	0.1327842E-01	0.6288019	0.8101382E-05	1.889955
06272011	23	0.002	0.000	0.000	0.001	0.001	0.000	0.000	0.000	0.006	0.000	0.004	298.536	0.862	NaN	0.9665558	0.4522014E-03	0.3298951
06272011	24	0.001	0.000	0.000	0.001	0.000	0.000	0.000	0.000	0.004	0.000	0.004	298.268	0.885	NaN	1.183049	0.1354043E-02	-0.5862946E-01
06282011	01	0.001	0.000	0.001	0.000	0.000	0.000	0.000	0.000	0.005	0.000	0.004	298.053	0.909	0.1200259E-02	1.388889	0.4604735E-03	0.4794628
06282011	02	0.001	0.003	0.002	0.001	0.001	0.000	0.000	0.000	0.007	0.000	0.007	297.968	0.911	0.000000	2.524530	0.2025741E-02	0.9559663E-01
06282011	03	0.001	0.013	0.005	0.001	0.001	0.000	0.000	0.001	0.009	0.000	0.011	298.385	0.843	0.000000	2.148573	0.2429744E-02	-0.5341053E-01
06282011	04	0.001	0.020	0.006	0.001	0.002	0.000	0.001	0.001	0.011	0.000	0.013	297.939	0.867	0.000000	3.085293	0.2687657E-02	0.5992265E-01
06282011	05	0.001	0.018	0.005	0.001	0.002	0.000	0.001	0.001	0.012	0.000	0.013	297.693	0.892	0.000000	3.565106	0.2723816E-02	0.1168947
06282011	06	0.002	0.014	0.004	0.001	0.003	0.000	0.001	0.001	0.014	0.000	0.012	297.674	0.900	0.000000	3.554195	0.2361653E-02	0.1775252
06282011	07	0.002	0.015	0.004	0.001	0.004	0.000	0.001	0.001	0.015	0.000	0.011	298.534	0.901	0.3513485E-01	3.294516	0.4574221E-04	1.857474
06282011	08	0.002	0.033	0.010	0.001	0.004	0.000	0.001	0.001	0.014	0.000	0.010	299.666	0.865	0.1589465E-01	2.333969	0.5149960E-04	1.656291
06282011	09	0.001	0.062	0.023	0.001	0.003	0.000	0.001	0.001	0.010	0.000	0.010	300.457	0.825	0.000000	1.748787	0.2199615E-02	-0.9960961E-01
06282011	10	0.000	0.046	0.029	0.000	0.001	0.000	0.000	0.000	0.009	0.000	0.013	300.926	0.794	0.000000	2.451372	0.4539279E-02	-0.2675776
06282011	11	0.000	0.029	0.026	0.000	0.001	0.000	0.000	0.000	0.009	0.000	0.015	300.651	0.770	0.000000	2.734105	0.6370830E-02	-0.3673808
06282011	12	0.000	0.016	0.021	0.000	0.000	0.000	0.000	0.000	0.010	0.000	0.016	300.207	0.760	0.3504753E-04	2.847300	0.7164405E-02	-0.4007469
06282011	13	0.000	0.009	0.017	0.000	0.000	0.000	0.000	0.000	0.010	0.000	0.017	300.369	0.744	0.2580881E-04	2.867934	0.8112704E-02	-0.4515965
06282011	14	0.000	0.006	0.015	0.000	0.000	0.000	0.000	0.000	0.010	0.000	0.020	300.462	0.741	0.2801418E-04	3.531651	0.1128574E-01	-0.5045521
06282011	15	0.000	0.009	0.020	0.000	0.000	0.000	0.000	0.000	0.010	0.000	0.024	300.360	0.743	0.3218651E-04	4.416606	0.1554940E-01	-0.5466251
06282011	16	0.000	0.014	0.022	0.000	0.000	0.000	0.000	0.001	0.011	0.000	0.023	300.130	0.760	0.4291534E-04	4.164893	0.1265065E-01	-0.4825089
06282011	17	0.000	0.016	0.021	0.000	0.000	0.000	0.000	0.001	0.012	0.000	0.023	299.536	0.783	0.6377697E-04	4.389764	0.1185183E-01	-0.4313441
06282011	18	0.000	0.012	0.018	0.000	0.000	0.000	0.001	0.001	0.014	0.000	0.024	298.793	0.802	0.1198649E-03	4.771022	0.1030123E-01	-0.3342778
06282011	19	0.000	0.009	0.016	0.000	0.000	0.000	0.001	0.001	0.016	0.000	0.025	298.013	0.826	0.2270937E-03	5.594626	0.9927817E-02	-0.2490827
06282011	20	0.000	0.007	0.013	0.000	0.000	0.000	0.001	0.001	0.018	0.000	0.025	297.737	0.837	0.3280640E-03	5.697561	0.8521349E-02	-0.1748193
06282011	21	0.000	0.007	0.012	0.000	0.000	0.000	0.001	0.001	0.020	0.000	0.025	297.462	0.853	0.4777312E-03	5.825139	0.7339544E-02	-0.1003628
06282011	22	0.001	0.008	0.011	0.000	0.000	0.000	0.001	0.001	0.022	0.000	0.025	296.806	0.881	0.1167178E-02	6.808702	0.6455213E-02	0.2315370E-01
06282011	23	0.001	0.008	0.011	0.000	0.000	0.000	0.001	0.001	0.024	0.000	0.024	296.332	0.898	0.2441406E-02	7.568248	0.5622653E-02	0.1290541
06282011	24	0.001	0.007	0.011	0.000	0.000	0.000	0.001	0.001	0.026	0.000	0.024	295.947	0.912	0.3905416E-02	8.296232	0.5331118E-02	0.1920627
06292011	01	0.001	0.006	0.010	0.000	0.000	0.000	0.001	0.001	0.028	0.000	0.022	295.613	0.926	0.1000571E-01	9.465454	0.4406753E-02	0.3320227
06292011	02	0.002	0.006	0.010	0.000	0.000	0.000	0.001	0.001	0.029	0.000	0.021	295.387	0.934	0.1557499E-01	9.003596	0.3863655E-02	0.3674177
06292011	03	0.003	0.005	0.009	0.000	0.000	0.000	0.001	0.001	0.031	0.000	0.019	295.276	0.933	0.5301452E-01	8.361073	0.3239508E-02	0.4117829
06292011	04	0.003	0.006	0.009	0.000	0.000	0.000	0.001	0.001	0.033	0.001	0.018	295.205	0.931	NaN	8.721064	0.3307694E-02	0.4210442
06292011	05	0.007	0.007	0.009	0.000	0.001	0.000	0.001	0.001	0.032	0.001	0.018	295.144	0.927	NaN	9.936672	0.1660864E-02	0.7769070
06292011	06	0.009	0.012	0.010	0.000	0.001	0.000	0.002	0.001	0.030	0.001	0.018	295.054	0.924	NaN	8.971170	0.1681444E-02	0.7271667
06292011	07	0.008	0.028	0.015	0.000	0.001	0.000	0.002	0.001	0.029	0.001	0.018	295.557	0.914	NaN	7.663441	0.5212361E-02	0.1673893
06292011	08	0.004	0.080	0.037	0.000	0.001	0.000	0.003	0.001	0.034	0.001	0.021	297.105	0.861	NaN	5.054050	0.2976176E-01	-0.7700190
06292011	09	0.002	0.153	0.056	0.000	0.001	0.000	0.002	0.001	0.046	0.001	0.033	298.846	0.796	0.2199590E-02	5.150424	0.5624287E-02	-0.3822454E-01
06292011	10	0.001	0.139	0.050	0.000	0.001	0.000	0.001	0.001	0.046	0.001	0.037	300.561	0.734	0.4522800E-03	4.289945	0.5170936E-02	-0.8111744E-01
06292011	11	0.001	0.110	0.049	0.000	0.001	0.000	0.001	0.001	0.041	0.001	0.039	302.277	0.673	0.1248121E-03	3.702465	0.3184525E-02	0.6544634E-01
06292011	12	0.000	0.070	0.045	0.000	0.001	0.000	0.001	0.001	0.033	0.000	0.041	303.775	0.616	0.1049042E-04	3.736697	0.6477784E-02	-0.2389386
06292011	13	0.000	0.046	0.041	0.000	0.001	0.000	0.001	0.001	0.028	0.000	0.044	304.974	0.573	0.3337860E-05	4.009559	0.1396601E-01	-0.5419757
06292011	14	0.000	0.035	0.040	0.000	0.001	0.000	0.001	0.001	0.027	0.000	0.049	305.631	0.548	0.2622604E-05	4.580616	0.2003144E-01	-0.6407883
06292011	15	0.000	0.035	0.040	0.000	0.001	0.000	0.001	0.001	0.028	0.000	0.052	305.609	0.544	0.2443790E-05	4.801943	0.2206010E-01	-0.6621904
06292011	16	0.000	0.038	0.037	0.000	0.001	0.000	0.001	0.001	0.031	0.000	0.053	305.252	0.554	0.2861023E-05	4.836534	0.2008292E-01	-0.6182925
06292011	17	0.000	0.046	0.033	0.000	0.001	0.000	0.001	0.002	0.036	0.000	0.053	304.658	0.564	0.3457069E-05	4.426425	0.1402668E-01	-0.5009018
06292011	18	0.000	0.046	0.027	0.000	0.001	0.000	0.001	0.002	0.043	0.000	0.053	304.015	0.579	0.6616116E-05	4.136569	0.7316328E-02	-0.2476530
06292011	19	0.001	0.031	0.019	0.001	0.001	0.000	0.001	0.002	0.054	0.000	0.053	303.045	0.632	0.000000	4.301984	0.3082909E-02	0.1447080
06292011	20	0.001	0.024	0.011	0.002	0.001	0.000	0.002	0.003	0.058	0.000	0.050	303.691	0.453	0.000000	1.955642	0.2039853E-02	-0.1830942E-01
06292011	21	0.001	0.020	0.005	0.003	0.001	0.000	0.001	0.002	0.049	0.000	0.046	303.153	0.451	0.000000	1.888360	0.1106517E-02	0.2321267
06292011	22	0.000	0.013	0.005	0.004	0.001	0.000	0.001	0.002	0.041	0.000	0.043	302.358	0.515	0.000000	2.345982	0.1193554E-02	0.2934824
06292011	23	0.000	0.012	0.004	0.003	0.001	0.000	0.001	0.001	0.031	0.000	0.040	300.442	0.642	0.000000	3.991311	0.7732598E-02	-0.2872099
06292011	24	0.000	0.011	0.004	0.003	0.002	0.000	0.001	0.001	0.028	0.000	0.041	299.875	0.686	0.000000	5.120660	0.1139199E-01	-0.3472736
