# Supplementary material for: Understanding nitrate formation in a world with less sulfate
Source: Copernicus journal article supplement (doi:10.5194/acp-18-12765-2018), 2018-09-05
Supplement: Supplementary file 2 [file acp-18-12765-2018-supplement.zip › DATA/RAW DATA FOR DIURNALS/data_extract_SOAS_jun_mod2011.csv]

Date	Hour	NH3	SO2	HNO3	CL	NA	MG	K	CA	NH4	NO3	SO4	T	RH	e_NO3	Water	H+	pH
06022011	01	0.053	0.021	0.004	0.004	0.003	0.002	0.005	0.011	0.010	0.001	0.022	297.431	0.808	0.4299980E-01	2.081138	0.1424992E-04	2.164489
06022011	02	0.062	0.021	0.003	0.004	0.003	0.002	0.006	0.012	0.008	0.001	0.022	297.023	0.840	0.7462674E-01	2.211474	0.7238186E-05	2.485052
06022011	03	0.068	0.022	0.003	0.003	0.003	0.002	0.006	0.013	0.005	0.002	0.021	296.787	0.852	0.1168972	1.941403	0.2788293E-05	2.842777
06022011	04	0.068	0.023	0.003	0.003	0.004	0.002	0.007	0.013	0.004	0.002	0.021	296.615	0.858	0.2037814	2.168948	0.1590594E-05	3.134690
06022011	05	0.064	0.022	0.002	0.004	0.004	0.002	0.007	0.013	0.002	0.002	0.020	296.459	0.865	0.2455186	2.101830	0.1084987E-05	3.287173
06022011	06	0.062	0.020	0.002	0.004	0.004	0.002	0.007	0.013	0.002	0.002	0.020	296.365	0.868	0.2442489	2.100075	0.1106561E-05	3.278260
06022011	07	0.061	0.019	0.004	0.003	0.004	0.002	0.008	0.013	0.002	0.002	0.019	297.201	0.871	0.1776450	1.745238	0.1085372E-05	3.206276
06022011	08	0.054	0.017	0.007	0.003	0.004	0.002	0.008	0.013	0.002	0.002	0.019	300.374	0.780	0.6812066E-01	0.9875229	0.7764851E-06	3.104414
06022011	09	0.069	0.038	0.012	0.001	0.003	0.001	0.006	0.008	0.013	0.002	0.020	302.310	0.694	0.8949578E-02	1.384278	0.2409483E-04	1.759299
06022011	10	0.052	0.042	0.021	0.001	0.002	0.001	0.003	0.004	0.028	0.001	0.021	304.306	0.603	0.6733716E-02	1.496283	0.5102584E-04	1.467224
06022011	11	0.032	0.026	0.019	0.000	0.002	0.001	0.002	0.003	0.027	0.001	0.019	306.134	0.529	NaN	1.665351	0.2168517E-03	0.8853428
06022011	12	0.026	0.021	0.018	0.000	0.002	0.000	0.002	0.002	0.028	0.001	0.019	307.836	0.468	NaN	1.320540	0.5895966E-03	0.3501966
06022011	13	0.023	0.022	0.018	0.000	0.001	0.000	0.002	0.002	0.030	0.001	0.020	310.087	0.395	NaN	1.030906	0.1071479E-02	-0.1676462E-01
06022011	14	0.010	0.012	0.015	0.000	0.001	0.000	0.002	0.002	0.038	0.001	0.022	307.468	0.440	NaN	1.200169	0.3824468E-02	-0.5033287
06022011	15	0.006	0.003	0.009	0.000	0.001	0.000	0.001	0.001	0.040	0.001	0.025	305.300	0.530	0.1167077E-01	1.679000	0.5307206E-02	-0.4998154
06022011	16	0.006	0.002	0.005	0.001	0.001	0.000	0.001	0.001	0.050	0.000	0.027	306.182	0.528	0.1651210E-01	1.819252	0.3581542E-04	1.705823
06022011	17	0.010	0.003	0.007	0.001	0.001	0.000	0.001	0.001	0.057	0.001	0.031	306.981	0.471	0.1235485E-01	1.766681	0.4314666E-04	1.612211
06022011	18	0.008	0.006	0.008	0.001	0.001	0.000	0.001	0.002	0.064	0.001	0.035	306.139	0.519	0.1542532E-01	2.245487	0.6055686E-04	1.569147
06022011	19	0.006	0.007	0.008	0.001	0.001	0.000	0.002	0.002	0.072	0.001	0.039	304.488	0.557	0.2090812E-01	2.800749	0.8471958E-04	1.519290
06022011	20	0.006	0.009	0.008	0.002	0.001	0.000	0.002	0.002	0.082	0.001	0.045	302.434	0.567	0.2799904E-01	3.355111	0.1285005E-03	1.416802
06022011	21	0.007	0.011	0.009	0.002	0.002	0.000	0.003	0.002	0.089	0.001	0.049	301.150	0.574	0.3128713E-01	3.666028	0.1682172E-03	1.338325
06022011	22	0.011	0.012	0.010	0.002	0.002	0.000	0.003	0.002	0.093	0.001	0.051	300.233	0.601	0.3526425E-01	4.172989	0.2088703E-03	1.300570
06022011	23	0.017	0.013	0.011	0.001	0.002	0.000	0.004	0.002	0.093	0.001	0.051	299.397	0.645	0.3991061E-01	4.835943	0.2409708E-03	1.302517
06022011	24	0.024	0.013	0.011	0.001	0.002	0.000	0.004	0.002	0.090	0.001	0.050	298.592	0.705	0.4867381E-01	5.771256	0.2816123E-03	1.311619
06032011	01	0.030	0.012	0.010	0.001	0.002	0.000	0.004	0.002	0.086	0.001	0.048	297.763	0.785	0.6160927E-01	7.529776	0.2805078E-03	1.428837
06032011	02	0.032	0.010	0.008	0.001	0.002	0.001	0.004	0.002	0.080	0.001	0.045	297.198	0.838	0.8028054E-01	9.093947	0.2409887E-03	1.576756
06032011	03	0.031	0.008	0.006	0.001	0.002	0.001	0.004	0.002	0.073	0.001	0.042	296.937	0.852	0.8587950E-01	8.957200	0.2176840E-03	1.614346
06032011	04	0.031	0.007	0.004	0.001	0.002	0.001	0.004	0.003	0.065	0.001	0.038	296.834	0.846	0.8821023E-01	7.838632	0.1615692E-03	1.685882
06032011	05	0.030	0.005	0.003	0.001	0.002	0.001	0.004	0.003	0.058	0.001	0.035	296.759	0.835	0.8605069E-01	6.765819	0.1307248E-03	1.713962
06032011	06	0.025	0.004	0.002	0.002	0.003	0.001	0.003	0.002	0.052	0.001	0.032	296.574	0.853	0.9163404E-01	6.744350	0.1190767E-03	1.753113
06032011	07	0.025	0.004	0.002	0.002	0.003	0.001	0.003	0.002	0.049	0.001	0.030	297.472	0.852	0.8145618E-01	6.296922	0.1004505E-03	1.797176
06032011	08	0.017	0.006	0.003	0.001	0.003	0.001	0.003	0.003	0.045	0.001	0.028	300.215	0.747	0.4222286E-01	3.554420	0.6598649E-04	1.731314
06032011	09	0.009	0.023	0.009	0.001	0.003	0.000	0.002	0.002	0.029	0.001	0.020	302.540	0.659	0.1374984E-01	1.865946	0.5864670E-04	1.502656
06032011	10	0.007	0.030	0.015	0.001	0.002	0.000	0.001	0.002	0.022	0.001	0.015	304.637	0.580	0.5794168E-02	1.066833	0.4034480E-04	1.422309
06032011	11	0.007	0.036	0.017	0.000	0.001	0.000	0.001	0.002	0.024	0.001	0.016	307.051	0.489	NaN	0.9682377	0.1068703E-01	-1.042875
06032011	12	0.004	0.045	0.020	0.000	0.001	0.000	0.001	0.002	0.031	0.001	0.020	309.253	0.416	0.3819585E-02	1.013140	0.5714984E-02	-0.7513456
06032011	13	0.002	0.025	0.017	0.000	0.001	0.000	0.001	0.002	0.032	0.000	0.024	306.985	0.483	0.5275011E-04	1.079839	0.4287657E-02	-0.5988611
06032011	14	0.002	0.011	0.012	0.000	0.001	0.000	0.001	0.001	0.035	0.000	0.026	307.331	0.450	0.2878904E-04	1.046954	0.3590595E-02	-0.5352386
06032011	15	0.002	0.006	0.010	0.000	0.001	0.000	0.001	0.001	0.039	0.000	0.027	308.784	0.408	0.3528595E-04	1.009459	0.4569127E-02	-0.6557447
06032011	16	0.004	0.003	0.008	0.001	0.001	0.000	0.001	0.001	0.038	0.000	0.025	306.083	0.503	0.000000	1.413001	0.5438319E-02	-0.5853223
06032011	17	0.004	0.002	0.006	0.001	0.001	0.000	0.001	0.001	0.037	0.000	0.022	305.923	0.456	0.1036054E-01	1.199798	0.2935543E-04	1.611420
06032011	18	0.017	0.001	0.005	0.001	0.001	0.000	0.001	0.001	0.037	0.000	0.020	306.065	0.448	0.9862125E-02	1.053512	0.2335774E-04	1.654209
06032011	19	0.029	0.002	0.005	0.001	0.001	0.000	0.001	0.001	0.037	0.000	0.020	304.308	0.497	0.1259893E-01	1.218829	0.3146378E-04	1.588132
06032011	20	0.025	0.002	0.005	0.002	0.001	0.000	0.001	0.001	0.038	0.000	0.021	302.108	0.531	0.1615578E-01	1.398495	0.4538966E-04	1.488704
06032011	21	0.022	0.004	0.005	0.002	0.001	0.000	0.001	0.001	0.039	0.000	0.021	300.930	0.542	0.1781422E-01	1.438995	0.5240489E-04	1.438687
06032011	22	0.023	0.007	0.006	0.002	0.001	0.000	0.001	0.001	0.039	0.000	0.022	299.920	0.589	0.2044237E-01	1.745609	0.7027554E-04	1.395143
06032011	23	0.025	0.009	0.006	0.001	0.001	0.000	0.001	0.001	0.039	0.000	0.022	299.080	0.656	0.2556646E-01	2.154757	0.7986507E-04	1.431041
06032011	24	0.029	0.009	0.006	0.001	0.001	0.000	0.001	0.001	0.037	0.000	0.021	298.310	0.733	0.3050900E-01	2.592279	0.8831049E-04	1.467669
06042011	01	0.030	0.008	0.006	0.001	0.001	0.000	0.002	0.001	0.034	0.000	0.020	297.602	0.813	0.3716010E-01	3.410752	0.8910535E-04	1.582946
06042011	02	0.028	0.007	0.005	0.001	0.001	0.001	0.002	0.002	0.029	0.000	0.018	297.114	0.858	0.4205990E-01	3.831175	0.6999883E-04	1.738241
06042011	03	0.026	0.006	0.005	0.001	0.001	0.001	0.002	0.002	0.024	0.000	0.016	296.851	0.867	0.3931797E-01	3.586057	0.6449420E-04	1.745096
06042011	04	0.027	0.007	0.004	0.001	0.002	0.001	0.003	0.002	0.018	0.000	0.014	296.648	0.871	0.3694922E-01	3.073691	0.4733822E-04	1.812448
06042011	05	0.029	0.008	0.004	0.001	0.002	0.001	0.003	0.003	0.013	0.000	0.012	296.413	0.879	0.3724998E-01	2.488825	0.2712429E-04	1.962636
06042011	06	0.033	0.009	0.004	0.001	0.002	0.001	0.004	0.003	0.010	0.000	0.012	296.455	0.858	0.3431767E-01	2.159930	0.2250569E-04	1.982147
06042011	07	0.034	0.009	0.005	0.002	0.003	0.001	0.005	0.004	0.007	0.001	0.012	297.176	0.862	0.3738630E-01	1.943873	0.1224905E-04	2.200565
06042011	08	0.037	0.013	0.011	0.001	0.003	0.001	0.006	0.005	0.005	0.001	0.013	299.540	0.797	0.1726550E-01	1.416936	0.1086452E-04	2.115340
06042011	09	0.068	0.038	0.018	0.001	0.004	0.001	0.007	0.005	0.008	0.001	0.014	302.067	0.692	0.1229489E-01	1.057710	0.6914037E-05	2.184635
06042011	10	0.051	0.057	0.028	0.001	0.003	0.001	0.005	0.003	0.014	0.001	0.015	304.612	0.581	0.3580213E-02	0.9822621	0.2790433E-04	1.546556
06042011	11	0.022	0.059	0.035	0.000	0.002	0.000	0.003	0.002	0.019	0.001	0.014	306.570	0.492	NaN	1.174724	0.1053252E-01	-0.9525964
06042011	12	0.007	0.037	0.027	0.000	0.001	0.000	0.002	0.001	0.021	0.000	0.013	306.974	0.482	NaN	0.8397727	0.1801817E-01	-1.331549
06042011	13	0.003	0.023	0.018	0.001	0.001	0.000	0.002	0.001	0.019	0.000	0.014	306.327	0.502	0.000000	0.7786313	0.3684746E-02	-0.6750757
06042011	14	0.004	0.014	0.011	0.001	0.001	0.000	0.001	0.001	0.021	0.000	0.015	307.490	0.456	0.000000	0.7677364	0.4159667E-02	-0.7338464
06042011	15	0.004	0.014	0.011	0.001	0.001	0.000	0.001	0.001	0.028	0.000	0.017	308.873	0.404	0.4005551E-02	0.7608197	0.1742333E-04	1.640151
06042011	16	0.009	0.025	0.015	0.001	0.001	0.000	0.001	0.001	0.029	0.000	0.017	309.455	0.368	0.2979815E-02	0.6900225	0.1713631E-04	1.604946
06042011	17	0.013	0.015	0.011	0.001	0.001	0.000	0.001	0.001	0.029	0.000	0.017	305.339	0.527	0.7254541E-02	1.117990	0.3538877E-04	1.499572
06042011	18	0.015	0.008	0.006	0.001	0.001	0.000	0.002	0.001	0.029	0.000	0.017	304.318	0.589	0.1174045E-01	1.308107	0.2965649E-04	1.644524
06042011	19	0.025	0.009	0.006	0.001	0.001	0.000	0.002	0.001	0.030	0.000	0.018	303.185	0.620	0.1442552E-01	1.524171	0.3742902E-04	1.609825
06042011	20	0.038	0.012	0.006	0.002	0.001	0.000	0.002	0.002	0.027	0.000	0.017	301.224	0.603	0.1337677E-01	1.262071	0.4051389E-04	1.493480
06042011	21	0.034	0.012	0.005	0.002	0.001	0.001	0.002	0.003	0.024	0.000	0.017	299.912	0.595	0.1478618E-01	1.241749	0.3463490E-04	1.554520
06042011	22	0.027	0.011	0.003	0.003	0.002	0.001	0.003	0.004	0.019	0.000	0.017	299.793	0.555	0.1492614E-01	1.026208	0.2343025E-04	1.641459
06042011	23	0.028	0.012	0.003	0.004	0.002	0.001	0.004	0.006	0.015	0.000	0.017	298.724	0.633	0.1497811E-01	1.055849	0.2287300E-04	1.664279
06042011	24	0.034	0.012	0.003	0.004	0.002	0.001	0.005	0.007	0.011	0.001	0.017	297.977	0.722	0.1462638E-01	1.280030	0.2297466E-04	1.745971
06052011	01	0.034	0.011	0.003	0.004	0.003	0.002	0.005	0.008	0.008	0.001	0.017	297.526	0.764	0.2321362E-01	1.413104	0.1144533E-04	2.091546
06052011	02	0.038	0.011	0.003	0.004	0.003	0.002	0.006	0.009	0.005	0.001	0.017	296.960	0.831	0.6079441E-01	1.693328	0.4471357E-05	2.578302
06052011	03	0.041	0.012	0.002	0.004	0.003	0.002	0.007	0.010	0.002	0.001	0.017	296.686	0.856	0.1937720	1.879498	0.1046401E-05	3.254344
06052011	04	0.040	0.013	0.002	0.003	0.004	0.002	0.008	0.011	0.002	0.001	0.018	296.464	0.866	0.2164218	1.969861	0.1156411E-05	3.231323
06052011	05	0.040	0.016	0.002	0.003	0.004	0.002	0.009	0.012	0.002	0.002	0.018	296.290	0.871	0.1747172	1.662483	0.1026083E-05	3.209575
06052011	06	0.039	0.018	0.002	0.003	0.005	0.002	0.010	0.012	0.002	0.002	0.018	296.216	0.872	0.1695572	1.639134	0.9065511E-06	3.257222
06052011	07	0.039	0.021	0.004	0.003	0.005	0.002	0.011	0.013	0.002	0.002	0.019	297.107	0.848	0.1179654	1.383424	0.7301284E-06	3.277556
06052011	08	0.057	0.041	0.010	0.002	0.005	0.002	0.010	0.013	0.003	0.003	0.020	299.529	0.761	0.7237554E-01	1.049884	0.8578866E-06	3.087711
06052011	09	0.077	0.089	0.017	0.001	0.004	0.001	0.007	0.009	0.015	0.002	0.023	301.987	0.661	0.1078463E-01	1.459431	0.2594499E-04	1.750130
06052011	10	0.056	0.085	0.021	0.000	0.003	0.001	0.004	0.005	0.026	0.001	0.022	304.848	0.544	NaN	1.834172	0.7202323E-04	1.405967
06052011	11	0.038	0.076	0.021	0.000	0.002	0.000	0.003	0.003	0.030	0.001	0.021	306.951	0.457	NaN	1.380532	0.2049676E-03	0.8283615
06052011	12	0.032	0.056	0.018	0.000	0.001	0.000	0.003	0.003	0.029	0.000	0.019	308.640	0.402	NaN	0.9341733	0.1681331E-03	0.7447742
06052011	13	0.027	0.042	0.017	0.000	0.001	0.000	0.003	0.002	0.028	0.000	0.018	310.444	0.349	NaN	0.7477164	0.2217879E-03	0.5277991
06052011	14	0.019	0.025	0.015	0.000	0.001	0.000	0.003	0.002	0.030	0.000	0.019	310.285	0.338	NaN	0.7311972	0.5706724E-03	0.1076477
06052011	15	0.018	0.015	0.014	0.000	0.001	0.000	0.003	0.002	0.033	0.000	0.020	308.763	0.376	NaN	0.8949261	0.6449085E-03	0.1422891
06052011	16	0.019	0.009	0.012	0.000	0.001	0.000	0.003	0.001	0.035	0.000	0.021	306.379	0.433	NaN	1.154836	0.7625921E-03	0.1802281
06052011	17	0.026	0.010	0.010	0.000	0.001	0.000	0.003	0.002	0.035	0.000	0.022	307.691	0.368	NaN	0.9155600	0.3865031E-03	0.3745339
06052011	18	0.039	0.016	0.012	0.000	0.002	0.000	0.003	0.002	0.034	0.000	0.021	307.153	0.355	NaN	0.8818519	0.1641483E-03	0.7301593
06052011	19	0.041	0.020	0.009	0.001	0.002	0.000	0.003	0.002	0.033	0.000	0.021	305.953	0.366	0.5603969E-02	0.8021482	0.2383569E-04	1.527027
06052011	20	0.027	0.012	0.004	0.001	0.002	0.000	0.004	0.002	0.032	0.000	0.021	300.780	0.507	0.1682454E-01	1.205786	0.3674016E-04	1.516129
06052011	21	0.021	0.006	0.003	0.002	0.002	0.001	0.004	0.003	0.030	0.000	0.022	299.128	0.564	0.2346176E-01	1.462505	0.3790863E-04	1.586359
06052011	22	0.020	0.005	0.003	0.003	0.003	0.001	0.006	0.004	0.028	0.000	0.023	298.704	0.562	0.2321184E-01	1.436669	0.3958778E-04	1.559796
06052011	23	0.025	0.005	0.003	0.004	0.004	0.001	0.007	0.005	0.025	0.000	0.024	297.243	0.650	0.2811980E-01	1.902895	0.4614949E-04	1.615248
06052011	24	0.039	0.007	0.003	0.004	0.004	0.001	0.009	0.006	0.023	0.000	0.025	296.522	0.713	0.3288490E-01	2.302904	0.5017406E-04	1.661796
06062011	01	0.052	0.009	0.003	0.004	0.004	0.001	0.010	0.007	0.019	0.001	0.025	295.769	0.806	0.7789475E-01	3.270587	0.2935137E-04	2.046997
06062011	02	0.058	0.010	0.002	0.004	0.005	0.002	0.011	0.009	0.014	0.001	0.025	295.245	0.863	0.1695102	3.950434	0.1205216E-04	2.515580
06062011	03	0.053	0.011	0.002	0.004	0.005	0.002	0.013	0.010	0.010	0.001	0.025	294.869	0.887	0.2539385	4.728913	0.8289675E-05	2.756224
06062011	04	0.047	0.013	0.002	0.004	0.006	0.002	0.013	0.012	0.007	0.001	0.026	294.616	0.895	0.3113347	4.956632	0.6427947E-05	2.887114
06062011	05	0.040	0.014	0.002	0.004	0.006	0.002	0.013	0.012	0.007	0.002	0.026	294.394	0.894	0.2610807	4.508772	0.7313585E-05	2.789928
06062011	06	0.036	0.016	0.003	0.004	0.006	0.002	0.013	0.012	0.008	0.002	0.026	294.218	0.886	0.2513951	4.545761	0.8028117E-05	2.752993
06062011	07	0.035	0.016	0.004	0.004	0.006	0.002	0.013	0.012	0.008	0.002	0.027	295.022	0.889	0.1897633	4.761960	0.1209839E-04	2.595058
06062011	08	0.033	0.020	0.010	0.004	0.006	0.002	0.013	0.012	0.010	0.003	0.027	298.127	0.766	0.4292619E-01	2.369159	0.1350900E-04	2.243971
06062011	09	0.046	0.047	0.018	0.002	0.005	0.001	0.011	0.009	0.021	0.002	0.028	300.552	0.660	0.1193756E-01	1.920003	0.5051295E-04	1.579899
06062011	10	0.035	0.069	0.023	0.001	0.004	0.001	0.007	0.006	0.025	0.002	0.024	303.206	0.530	0.5521595E-02	1.238908	0.4715217E-04	1.419537
06062011	11	0.028	0.077	0.025	0.000	0.003	0.001	0.005	0.004	0.024	0.001	0.020	305.513	0.425	NaN	1.208933	0.3051604E-03	0.5978739
06062011	12	0.032	0.063	0.024	0.000	0.002	0.000	0.005	0.003	0.025	0.001	0.020	307.425	0.358	NaN	0.8789970	0.2674291E-03	0.5167787
06062011	13	0.039	0.052	0.024	0.000	0.002	0.000	0.005	0.003	0.029	0.001	0.021	309.388	0.298	NaN	0.7047004	0.8831872E-04	0.9019517
06062011	14	0.043	0.044	0.023	0.000	0.002	0.000	0.005	0.003	0.030	0.000	0.022	310.515	0.265	NaN	0.6273710	0.7223399E-04	0.9387829
06062011	15	0.047	0.038	0.021	0.000	0.002	0.000	0.005	0.003	0.030	0.000	0.022	310.491	0.260	NaN	0.5873449	0.6084257E-04	0.9846857
06062011	16	0.054	0.037	0.020	0.000	0.002	0.000	0.004	0.003	0.028	0.000	0.020	310.078	0.265	NaN	0.5688804	0.4095617E-04	1.142702
06062011	17	0.063	0.039	0.019	0.000	0.002	0.000	0.005	0.003	0.025	0.000	0.019	309.257	0.276	NaN	0.5498758	0.2690832E-04	1.310378
06062011	18	0.074	0.042	0.017	0.000	0.002	0.000	0.005	0.003	0.023	0.000	0.018	308.095	0.308	NaN	0.5865241	0.2313100E-04	1.404092
06062011	19	0.075	0.042	0.011	0.001	0.002	0.001	0.006	0.004	0.019	0.000	0.018	305.599	0.389	0.3633320E-02	0.6157374	0.1135610E-04	1.734166
06062011	20	0.072	0.040	0.008	0.002	0.003	0.001	0.006	0.005	0.016	0.000	0.018	302.734	0.385	0.4791796E-02	0.5881068	0.1395521E-04	1.624720
06062011	21	0.077	0.040	0.006	0.003	0.003	0.001	0.007	0.006	0.012	0.001	0.018	300.909	0.399	0.5069733E-02	0.5391168	0.1306984E-04	1.615413
06062011	22	0.074	0.041	0.005	0.004	0.004	0.001	0.008	0.008	0.008	0.001	0.019	299.605	0.438	0.5861819E-02	0.5516359	0.1127313E-04	1.689608
06062011	23	0.065	0.040	0.004	0.005	0.004	0.002	0.009	0.010	0.005	0.001	0.020	298.378	0.527	0.2261275E-01	0.6974809	0.2490637E-05	2.447222
06062011	24	0.054	0.038	0.003	0.005	0.004	0.002	0.010	0.011	0.003	0.001	0.021	297.420	0.625	0.4721612E-01	0.9649932	0.1830912E-05	2.721857
06072011	01	0.040	0.040	0.002	0.005	0.004	0.002	0.009	0.012	0.003	0.001	0.022	296.650	0.695	0.4594374E-01	1.252377	0.3970866E-05	2.498850
06072011	02	0.027	0.039	0.002	0.005	0.004	0.002	0.009	0.011	0.004	0.001	0.022	296.140	0.733	0.3120768E-01	1.509132	0.1061222E-04	2.152921
06072011	03	0.020	0.037	0.002	0.005	0.004	0.002	0.007	0.011	0.007	0.001	0.021	295.919	0.742	0.2572429E-01	1.448485	0.1337037E-04	2.034771
06072011	04	0.015	0.036	0.002	0.005	0.004	0.002	0.006	0.010	0.010	0.001	0.021	295.804	0.743	0.1978552E-01	1.589354	0.2691447E-04	1.771235
06072011	05	0.010	0.033	0.002	0.005	0.003	0.001	0.005	0.008	0.014	0.001	0.020	295.753	0.740	0.2296156E-01	1.660368	0.3776707E-04	1.643091
06072011	06	0.009	0.026	0.001	0.005	0.003	0.001	0.003	0.007	0.016	0.001	0.019	295.773	0.738	0.2726597E-01	1.684221	0.3821274E-04	1.644191
06072011	07	0.010	0.017	0.002	0.004	0.002	0.001	0.003	0.006	0.016	0.000	0.018	296.500	0.758	0.2862191E-01	1.791554	0.3449806E-04	1.715435
06072011	08	0.012	0.010	0.003	0.003	0.002	0.001	0.003	0.006	0.015	0.000	0.017	299.752	0.661	0.1559633E-01	1.178755	0.2104837E-04	1.748205
06072011	09	0.010	0.010	0.006	0.002	0.002	0.001	0.002	0.004	0.015	0.001	0.014	302.083	0.582	0.7511616E-02	0.8667969	0.2012662E-04	1.634146
06072011	10	0.010	0.014	0.010	0.001	0.002	0.000	0.002	0.002	0.016	0.001	0.012	304.184	0.517	0.4539430E-02	0.6736597	0.2221365E-04	1.481821
06072011	11	0.009	0.009	0.011	0.001	0.001	0.000	0.001	0.001	0.014	0.000	0.010	306.374	0.453	0.3050148E-02	0.4976480	0.1480401E-04	1.526543
06072011	12	0.008	0.006	0.010	0.000	0.001	0.000	0.001	0.001	0.012	0.000	0.008	307.988	0.410	NaN	0.4351404	0.1577578E-02	-0.5593615
06072011	13	0.004	0.003	0.008	0.000	0.001	0.000	0.001	0.001	0.013	0.000	0.008	306.804	0.436	NaN	0.4422782	0.2444844E-02	-0.7425557
06072011	14	0.005	0.001	0.005	0.000	0.000	0.000	0.001	0.001	0.012	0.000	0.007	306.419	0.450	NaN	0.3725089	0.6866083E-03	-0.2655725
06072011	15	0.009	0.001	0.004	0.001	0.000	0.000	0.001	0.001	0.013	0.000	0.008	307.113	0.426	0.3352642E-02	0.3459325	0.5506040E-05	1.798152
06072011	16	0.011	0.001	0.003	0.001	0.000	0.000	0.001	0.001	0.013	0.000	0.008	305.158	0.502	0.5337000E-02	0.4282475	0.7143389E-05	1.777791
06072011	17	0.014	0.000	0.002	0.001	0.001	0.000	0.001	0.001	0.013	0.000	0.008	306.346	0.468	0.5647302E-02	0.4097491	0.5086364E-05	1.906111
06072011	18	0.016	0.001	0.003	0.001	0.001	0.000	0.001	0.001	0.014	0.000	0.008	305.676	0.437	0.4508197E-02	0.3752886	0.6409076E-05	1.767570
06072011	19	0.016	0.001	0.003	0.002	0.001	0.000	0.001	0.001	0.014	0.000	0.009	303.638	0.461	0.6118298E-02	0.4552385	0.1026589E-04	1.646842
06072011	20	0.017	0.001	0.002	0.002	0.001	0.000	0.001	0.001	0.015	0.000	0.010	301.913	0.388	0.7811785E-02	0.4144777	0.1083098E-04	1.582834
06072011	21	0.022	0.001	0.002	0.003	0.001	0.000	0.002	0.001	0.015	0.000	0.010	300.619	0.388	0.7771432E-02	0.3957567	0.1147212E-04	1.537784
06072011	22	0.023	0.001	0.003	0.003	0.001	0.000	0.002	0.001	0.015	0.000	0.011	299.531	0.430	0.8779168E-02	0.5009892	0.1880811E-04	1.425483
06072011	23	0.022	0.002	0.003	0.002	0.001	0.000	0.002	0.001	0.016	0.000	0.011	298.646	0.492	0.1138616E-01	0.5996611	0.2338891E-04	1.408896
06072011	24	0.020	0.002	0.003	0.002	0.002	0.000	0.002	0.001	0.016	0.000	0.011	297.839	0.570	0.1386368E-01	0.7790666	0.2635438E-04	1.470722
06082011	01	0.020	0.003	0.003	0.002	0.002	0.001	0.002	0.001	0.015	0.000	0.011	297.104	0.656	0.1745778E-01	1.093249	0.2520967E-04	1.637152
06082011	02	0.020	0.003	0.003	0.002	0.002	0.001	0.002	0.002	0.015	0.000	0.012	296.567	0.717	0.2082199E-01	1.318634	0.2937421E-04	1.652158
06082011	03	0.021	0.003	0.002	0.002	0.002	0.001	0.002	0.002	0.014	0.000	0.012	296.214	0.751	0.2675956E-01	1.459914	0.2674784E-04	1.737039
06082011	04	0.021	0.003	0.002	0.002	0.002	0.001	0.003	0.002	0.013	0.000	0.012	295.927	0.778	0.2860862E-01	1.620523	0.2644449E-04	1.787320
06082011	05	0.022	0.002	0.002	0.002	0.002	0.001	0.003	0.002	0.013	0.000	0.012	295.683	0.803	0.3069520E-01	1.760379	0.2800317E-04	1.798399
06082011	06	0.024	0.002	0.002	0.002	0.002	0.001	0.003	0.003	0.012	0.000	0.012	295.536	0.828	0.3038502E-01	1.824744	0.2619342E-04	1.843010
06082011	07	0.028	0.002	0.003	0.002	0.003	0.001	0.003	0.003	0.012	0.000	0.012	296.468	0.838	0.2709121E-01	1.939690	0.2760259E-04	1.846783
06082011	08	0.025	0.003	0.005	0.001	0.003	0.001	0.003	0.003	0.012	0.000	0.012	298.348	0.782	0.1614946E-01	1.479741	0.2640625E-04	1.748479
06082011	09	0.019	0.012	0.008	0.001	0.003	0.001	0.003	0.002	0.018	0.001	0.015	300.236	0.712	0.1322383E-01	1.642555	0.4228203E-04	1.589364
06082011	10	0.011	0.017	0.017	0.001	0.002	0.001	0.002	0.002	0.022	0.001	0.015	302.111	0.636	0.7240951E-02	1.319107	0.4778401E-04	1.440997
06082011	11	0.004	0.019	0.027	0.000	0.002	0.000	0.002	0.002	0.025	0.001	0.016	303.776	0.571	NaN	1.244750	0.2110551E-01	-1.229314
06082011	12	0.004	0.016	0.025	0.000	0.001	0.000	0.001	0.002	0.022	0.000	0.015	305.300	0.522	NaN	0.9286789	0.2168724E-01	-1.368339
06082011	13	0.003	0.010	0.017	0.000	0.001	0.000	0.001	0.001	0.018	0.000	0.012	306.496	0.483	NaN	0.6819320	0.1476754E-01	-1.335567
06082011	14	0.003	0.006	0.012	0.000	0.001	0.000	0.001	0.001	0.015	0.000	0.011	306.787	0.474	0.3390074E-02	0.5867401	0.3394268E-02	-0.7623003
06082011	15	0.002	0.004	0.009	0.000	0.000	0.000	0.001	0.001	0.014	0.000	0.010	306.161	0.489	0.2095103E-03	0.5090009	0.3026407E-02	-0.7742088
06082011	16	0.002	0.007	0.008	0.000	0.000	0.000	0.000	0.001	0.014	0.000	0.010	305.160	0.520	0.9226799E-04	0.5491650	0.2979074E-02	-0.7343785
06082011	17	0.003	0.014	0.008	0.000	0.001	0.000	0.001	0.001	0.015	0.000	0.011	303.780	0.565	0.6336331E-02	0.7601739	0.2974733E-02	-0.5925351
06082011	18	0.002	0.023	0.007	0.000	0.001	0.000	0.001	0.001	0.018	0.000	0.012	302.318	0.613	0.9229958E-02	0.9688230	0.2954815E-02	-0.4842858
06082011	19	0.002	0.025	0.006	0.001	0.001	0.000	0.001	0.001	0.021	0.000	0.015	300.808	0.667	0.000000	1.391644	0.3301140E-02	-0.3751359
06082011	20	0.001	0.022	0.004	0.001	0.001	0.000	0.001	0.001	0.026	0.000	0.021	299.173	0.723	0.000000	2.259508	0.3709913E-02	-0.2153498
06082011	21	0.001	0.019	0.004	0.001	0.001	0.000	0.001	0.001	0.030	0.000	0.029	298.039	0.777	0.000000	4.303999	0.4395696E-02	-0.9155544E-02
06082011	22	0.000	0.015	0.003	0.001	0.001	0.000	0.001	0.001	0.031	0.000	0.039	297.272	0.816	0.000000	7.842780	0.1089128E-01	-0.1426089
06082011	23	0.000	0.012	0.002	0.001	0.001	0.000	0.001	0.001	0.032	0.000	0.046	296.644	0.852	0.000000	11.47524	0.1762162E-01	-0.1862839
06082011	24	0.000	0.012	0.002	0.001	0.001	0.000	0.001	0.001	0.032	0.000	0.050	296.070	0.893	0.000000	16.73322	0.2282271E-01	-0.1347876
06092011	01	0.000	0.013	0.002	0.000	0.001	0.000	0.001	0.001	0.033	0.000	0.047	295.499	0.941	0.6982982E-02	26.62801	0.2109917E-01	0.1010734
06092011	02	0.001	0.014	0.002	0.000	0.001	0.000	0.002	0.001	0.045	0.000	0.045	295.003	0.970	0.4916823E-01	48.95304	0.1357276E-01	0.5571117
06092011	03	0.002	0.014	0.002	0.000	0.002	0.000	0.003	0.001	0.055	0.000	0.041	294.713	0.984	0.2074729	69.23097	0.7548580E-02	0.9624351
06092011	04	0.004	0.012	0.001	0.001	0.002	0.000	0.004	0.001	0.061	0.000	0.037	294.497	0.990	0.000000	137.5165	0.4116991E-02	1.523775
06092011	05	0.013	0.007	0.001	0.001	0.003	0.000	0.005	0.002	0.062	0.000	0.036	294.345	0.990	0.8249089	132.0216	0.3322599E-03	2.599167
06092011	06	0.016	0.007	0.001	0.001	0.003	0.000	0.005	0.002	0.061	0.001	0.036	294.515	0.981	0.6006298	61.87214	0.2563815E-03	2.382608
06092011	07	0.023	0.010	0.002	0.001	0.004	0.000	0.006	0.002	0.060	0.001	0.037	294.864	0.956	0.3827220	29.90181	0.1746500E-03	2.233529
06092011	08	0.029	0.027	0.005	0.001	0.004	0.000	0.006	0.002	0.048	0.001	0.030	296.780	0.862	0.6783676E-01	6.660746	0.1426430E-03	1.669272
06092011	09	0.019	0.065	0.011	0.000	0.002	0.000	0.004	0.002	0.028	0.001	0.018	299.036	0.758	NaN	3.174960	0.2879067E-03	1.042486
06092011	10	0.011	0.064	0.012	0.000	0.002	0.000	0.003	0.001	0.023	0.000	0.015	301.256	0.655	NaN	1.838251	0.1488383E-02	0.9168998E-01
06092011	11	0.006	0.058	0.011	0.000	0.001	0.000	0.002	0.001	0.020	0.000	0.012	303.216	0.571	NaN	1.027898	0.3057127E-02	-0.4733635
06092011	12	0.005	0.039	0.009	0.000	0.001	0.000	0.001	0.001	0.017	0.000	0.010	305.155	0.491	NaN	0.6638581	0.2551533E-02	-0.5847259
06092011	13	0.008	0.025	0.008	0.000	0.001	0.000	0.001	0.001	0.015	0.000	0.009	306.771	0.433	NaN	0.5115405	0.7507011E-03	-0.1665871
06092011	14	0.010	0.019	0.008	0.000	0.001	0.000	0.001	0.001	0.015	0.000	0.009	307.544	0.412	NaN	0.4822080	0.4459223E-03	0.3397522E-01
06092011	15	0.008	0.010	0.008	0.000	0.000	0.000	0.001	0.001	0.017	0.000	0.010	305.063	0.488	NaN	0.6622537	0.1144478E-02	-0.2375828
06092011	16	0.009	0.003	0.006	0.000	0.001	0.000	0.001	0.001	0.017	0.000	0.010	303.707	0.552	NaN	0.8030533	0.5019779E-03	0.2040598
06092011	17	0.013	0.003	0.005	0.001	0.001	0.000	0.002	0.001	0.016	0.000	0.010	304.165	0.556	0.6520748E-02	0.6617117	0.1355060E-04	1.688710
06092011	18	0.020	0.005	0.004	0.001	0.001	0.000	0.002	0.001	0.014	0.000	0.010	304.135	0.579	0.7651865E-02	0.7033577	0.1253699E-04	1.748983
06092011	19	0.026	0.009	0.004	0.001	0.001	0.000	0.003	0.001	0.012	0.000	0.010	303.518	0.601	0.7994890E-02	0.7271917	0.1208340E-04	1.779460
06092011	20	0.035	0.012	0.004	0.001	0.001	0.000	0.003	0.002	0.011	0.000	0.010	302.031	0.567	0.7076263E-02	0.5816944	0.1178060E-04	1.693528
06092011	21	0.049	0.015	0.005	0.001	0.002	0.000	0.004	0.002	0.010	0.000	0.010	300.747	0.556	0.6419241E-02	0.5594814	0.1336593E-04	1.621786
06092011	22	0.059	0.018	0.006	0.001	0.002	0.000	0.005	0.003	0.008	0.000	0.011	299.675	0.590	0.6459296E-02	0.5966977	0.1464313E-04	1.610121
06092011	23	0.064	0.019	0.006	0.001	0.002	0.001	0.006	0.003	0.007	0.000	0.011	298.716	0.647	0.1486826E-01	0.7940117	0.6803046E-05	2.067123
06092011	24	0.061	0.020	0.005	0.001	0.003	0.001	0.007	0.004	0.005	0.000	0.012	297.936	0.710	0.2842307E-01	0.9933511	0.4268194E-05	2.366859
06102011	01	0.056	0.019	0.005	0.002	0.003	0.001	0.008	0.004	0.004	0.000	0.012	297.242	0.774	0.5124241E-01	1.245533	0.3043149E-05	2.612032
06102011	02	0.040	0.018	0.005	0.002	0.003	0.001	0.007	0.005	0.004	0.001	0.013	296.778	0.808	0.4245323E-01	1.480435	0.6186278E-05	2.378960
06102011	03	0.030	0.017	0.005	0.002	0.003	0.001	0.007	0.006	0.004	0.001	0.013	296.617	0.799	0.4494637E-01	1.249738	0.3658429E-05	2.533525
06102011	04	0.025	0.016	0.005	0.002	0.003	0.001	0.006	0.007	0.002	0.001	0.014	296.428	0.797	0.2676195E-01	1.244384	0.7520624E-05	2.218700
06102011	05	0.024	0.018	0.005	0.002	0.003	0.001	0.006	0.009	0.001	0.001	0.014	296.247	0.800	0.7906169E-01	0.9227793	0.1002225E-05	2.964133
06102011	06	0.025	0.019	0.005	0.002	0.004	0.001	0.006	0.010	0.001	0.001	0.014	296.366	0.775	0.5675685E-01	0.6337101	0.6064068E-06	3.019127
06102011	07	0.027	0.020	0.007	0.002	0.004	0.002	0.006	0.011	0.001	0.001	0.014	297.262	0.773	0.3018051E-01	0.4122247	0.2041622E-06	3.305159
06102011	08	0.028	0.020	0.015	0.002	0.004	0.002	0.006	0.011	0.001	0.001	0.014	299.990	0.701	0.1212883E-01	0.2772779	0.1329885E-06	3.319101
06102011	09	0.040	0.059	0.020	0.001	0.003	0.001	0.004	0.007	0.007	0.001	0.015	301.915	0.623	0.3616929E-02	0.7689410	0.2009048E-04	1.582903
06102011	10	0.017	0.066	0.017	0.000	0.001	0.000	0.001	0.003	0.022	0.000	0.015	303.659	0.544	NaN	1.257117	0.1082106E-02	0.6510612E-01
06102011	11	0.004	0.047	0.014	0.000	0.001	0.000	0.001	0.001	0.027	0.000	0.016	305.018	0.506	NaN	1.047247	0.9153983E-02	-0.9415610
06102011	12	0.002	0.023	0.011	0.000	0.000	0.000	0.001	0.001	0.023	0.000	0.018	304.352	0.541	0.4237890E-04	0.9456679	0.2926452E-02	-0.4906028
06102011	13	0.001	0.008	0.008	0.000	0.000	0.000	0.000	0.001	0.020	0.000	0.018	303.478	0.611	0.3761053E-04	1.295432	0.1611277E-02	-0.9475560E-01
06102011	14	0.001	0.006	0.006	0.001	0.000	0.000	0.000	0.001	0.019	0.000	0.018	304.022	0.624	0.000000	1.359541	0.1498489E-02	-0.4226108E-01
06102011	15	0.001	0.006	0.006	0.001	0.000	0.000	0.000	0.001	0.021	0.000	0.018	305.916	0.497	0.000000	0.8563675	0.1298970E-02	-0.1809391
06102011	16	0.001	0.007	0.007	0.001	0.000	0.000	0.000	0.001	0.019	0.000	0.018	305.924	0.471	0.000000	0.7820574	0.7620524E-03	0.1125381E-01
06102011	17	0.001	0.010	0.007	0.000	0.000	0.000	0.000	0.001	0.020	0.000	0.018	304.790	0.485	0.1090765E-04	0.8341998	0.9873389E-03	-0.7319619E-01
06102011	18	0.001	0.014	0.006	0.001	0.000	0.000	0.001	0.001	0.024	0.000	0.018	303.300	0.518	0.000000	0.8791151	0.3112498E-02	-0.5490633
06102011	19	0.001	0.020	0.006	0.001	0.000	0.000	0.001	0.001	0.026	0.000	0.019	301.541	0.570	0.000000	1.135389	0.4132830E-02	-0.5611030
06102011	20	0.002	0.027	0.005	0.001	0.001	0.000	0.001	0.001	0.028	0.000	0.019	299.719	0.607	0.000000	1.459433	0.4022658E-02	-0.4403290
06102011	21	0.002	0.036	0.004	0.001	0.001	0.000	0.001	0.001	0.028	0.000	0.019	298.367	0.666	0.000000	1.784443	0.3798936E-02	-0.3281592
06102011	22	0.002	0.041	0.004	0.001	0.001	0.000	0.001	0.001	0.029	0.000	0.019	297.873	0.675	0.000000	1.878653	0.3565920E-02	-0.2783249
06102011	23	0.003	0.042	0.005	0.001	0.001	0.000	0.001	0.001	0.031	0.000	0.019	297.328	0.707	0.1886487E-03	2.175361	0.3020048E-02	-0.1424824
06102011	24	0.004	0.042	0.008	0.001	0.001	0.000	0.002	0.001	0.033	0.000	0.019	296.900	0.748	0.2669638E-01	2.500834	0.9963063E-04	1.399692
06112011	01	0.008	0.044	0.012	0.001	0.002	0.000	0.002	0.001	0.031	0.000	0.019	296.447	0.800	0.2607292E-01	3.097415	0.1335905E-03	1.365224
06112011	02	0.012	0.044	0.016	0.001	0.002	0.000	0.003	0.002	0.029	0.001	0.019	296.117	0.831	0.2325547E-01	3.381723	0.1529727E-03	1.344524
06112011	03	0.017	0.042	0.018	0.001	0.002	0.001	0.003	0.002	0.026	0.001	0.018	295.834	0.848	0.2752441E-01	3.624378	0.1215801E-03	1.474371
06112011	04	0.021	0.041	0.017	0.000	0.003	0.001	0.004	0.003	0.023	0.001	0.018	295.594	0.857	NaN	6.307649	0.3293612E-03	1.282195
06112011	05	0.022	0.041	0.015	0.001	0.003	0.001	0.005	0.003	0.021	0.001	0.018	295.351	0.863	0.4412735E-01	3.661938	0.6765839E-04	1.733389
06112011	06	0.022	0.042	0.012	0.001	0.004	0.001	0.005	0.004	0.018	0.001	0.018	295.281	0.861	0.4516846E-01	3.421837	0.5681950E-04	1.779762
06112011	07	0.027	0.047	0.014	0.001	0.004	0.001	0.006	0.004	0.016	0.001	0.017	295.767	0.859	0.5150294E-01	3.210618	0.3668277E-04	1.942127
06112011	08	0.052	0.070	0.021	0.001	0.004	0.001	0.005	0.004	0.015	0.002	0.016	297.920	0.785	0.3351885E-01	2.091016	0.2346571E-04	1.949924
06112011	09	0.077	0.091	0.019	0.000	0.003	0.000	0.004	0.003	0.016	0.001	0.014	300.462	0.688	NaN	2.306068	0.2582846E-04	1.950774
06112011	10	0.076	0.093	0.018	0.000	0.002	0.000	0.002	0.002	0.018	0.000	0.012	303.406	0.569	NaN	1.330917	0.2396288E-04	1.744612
06112011	11	0.062	0.081	0.023	0.000	0.001	0.000	0.001	0.001	0.019	0.000	0.011	306.077	0.468	NaN	1.013649	0.2842976E-04	1.552114
06112011	12	0.036	0.039	0.019	0.000	0.000	0.000	0.001	0.001	0.018	0.000	0.010	307.962	0.412	NaN	0.6672877	0.4772518E-04	1.145566
06112011	13	0.009	0.015	0.014	0.000	0.000	0.000	0.000	0.000	0.023	0.000	0.012	307.068	0.425	0.6985664E-04	0.6279435	0.1013094E-02	-0.2077294
06112011	14	0.003	0.003	0.007	0.000	0.000	0.000	0.000	0.000	0.018	0.000	0.011	305.747	0.495	0.3786683E-03	0.6759560	0.4426714E-03	0.1838369
06112011	15	0.004	0.001	0.005	0.000	0.000	0.000	0.000	0.000	0.018	0.000	0.011	306.621	0.471	0.4929304E-04	0.6489675	0.1838389E-02	-0.4522145
06112011	16	0.003	0.001	0.004	0.000	0.000	0.000	0.001	0.000	0.017	0.000	0.010	304.354	0.570	NaN	0.7643195	0.2601895E-02	-0.5320148
06112011	17	0.003	0.001	0.003	0.000	0.000	0.000	0.000	0.000	0.014	0.000	0.009	302.537	0.675	0.1044810E-02	0.9533513	0.4011222E-03	0.3759763
06112011	18	0.003	0.001	0.003	0.000	0.000	0.000	0.000	0.000	0.014	0.000	0.009	301.533	0.767	0.2308726E-02	1.328942	0.3538273E-03	0.5747147
06112011	19	0.003	0.006	0.004	0.000	0.000	0.000	0.001	0.000	0.016	0.000	0.010	300.768	0.795	NaN	1.704578	0.2104362E-02	-0.9150378E-01
06112011	20	0.003	0.017	0.005	0.001	0.001	0.000	0.001	0.001	0.023	0.000	0.015	299.502	0.747	0.9572506E-04	1.955230	0.2969851E-02	-0.1815368
06112011	21	0.008	0.022	0.004	0.001	0.001	0.000	0.001	0.001	0.030	0.000	0.017	298.169	0.764	0.3199285E-01	2.321093	0.5906580E-04	1.594357
06112011	22	0.016	0.025	0.005	0.001	0.001	0.000	0.001	0.001	0.029	0.000	0.017	297.185	0.790	0.3290278E-01	2.628089	0.7174185E-04	1.563867
06112011	23	0.020	0.026	0.005	0.001	0.001	0.000	0.002	0.002	0.026	0.000	0.016	296.447	0.822	0.3293556E-01	2.639344	0.6735815E-04	1.593106
06112011	24	0.022	0.026	0.004	0.001	0.002	0.000	0.003	0.002	0.020	0.000	0.015	295.876	0.855	0.4043901E-01	3.091710	0.5989452E-04	1.712812
06122011	01	0.022	0.023	0.004	0.001	0.002	0.001	0.004	0.003	0.015	0.000	0.014	295.363	0.890	0.4569900E-01	3.278552	0.4218185E-04	1.890556
06122011	02	0.019	0.020	0.004	0.001	0.003	0.001	0.004	0.004	0.010	0.000	0.013	294.992	0.910	0.5629164E-01	3.262847	0.2871729E-04	2.055453
06122011	03	0.017	0.018	0.005	0.001	0.003	0.001	0.005	0.005	0.007	0.000	0.013	294.712	0.917	0.7056981E-01	3.287652	0.1981655E-04	2.219858
06122011	04	0.017	0.019	0.006	0.001	0.003	0.001	0.005	0.005	0.005	0.001	0.012	294.484	0.921	0.7952136E-01	2.955075	0.1350815E-04	2.339972
06122011	05	0.018	0.020	0.007	0.001	0.003	0.001	0.005	0.006	0.004	0.001	0.012	294.274	0.924	0.1090217	2.665799	0.7257276E-05	2.565054
06122011	06	0.020	0.021	0.007	0.001	0.003	0.001	0.005	0.006	0.003	0.001	0.012	294.192	0.924	0.1151409	2.683618	0.6983651E-05	2.584638
06122011	07	0.026	0.022	0.009	0.001	0.003	0.001	0.005	0.006	0.004	0.002	0.012	295.097	0.924	0.1205994	2.815706	0.6364765E-05	2.645805
06122011	08	0.025	0.020	0.015	0.001	0.004	0.001	0.005	0.006	0.003	0.002	0.012	297.680	0.833	0.4158890E-01	1.321093	0.3928769E-05	2.526677
06122011	09	0.018	0.088	0.035	0.000	0.003	0.001	0.003	0.004	0.009	0.001	0.012	299.654	0.753	NaN	2.573642	0.1374701E-01	-0.7276601
06122011	10	0.015	0.081	0.029	0.000	0.002	0.000	0.002	0.003	0.013	0.000	0.011	301.784	0.666	NaN	1.625618	0.1055157E-01	-0.8122984
06122011	11	0.020	0.076	0.028	0.000	0.001	0.000	0.001	0.002	0.017	0.000	0.012	303.598	0.583	NaN	1.409981	0.6587044E-02	-0.6694774
06122011	12	0.010	0.022	0.017	0.000	0.001	0.000	0.001	0.001	0.024	0.000	0.013	303.553	0.574	NaN	1.285755	0.3615553E-02	-0.4490164
06122011	13	0.005	0.002	0.007	0.000	0.000	0.000	0.000	0.001	0.020	0.000	0.011	304.455	0.543	NaN	0.8118493	0.2300731E-02	-0.4523905
06122011	14	0.005	0.000	0.004	0.000	0.000	0.000	0.000	0.000	0.012	0.000	0.006	304.355	0.571	0.8338690E-04	0.4716981	0.6262289E-03	-0.1230690
06122011	15	0.005	0.000	0.002	0.001	0.000	0.000	0.000	0.000	0.009	0.000	0.005	304.153	0.569	0.5888939E-04	0.3930818	0.6288950E-03	-0.2040952
06122011	16	0.006	0.000	0.002	0.001	0.000	0.000	0.000	0.000	0.007	0.000	0.004	305.453	0.498	0.2813339E-04	0.2574003	0.5058976E-03	-0.2934536
06122011	17	0.006	0.000	0.003	0.001	0.000	0.000	0.000	0.000	0.007	0.000	0.004	304.930	0.508	0.3355742E-04	0.2649007	0.4855878E-03	-0.2631847
06122011	18	0.007	0.000	0.002	0.001	0.000	0.000	0.000	0.000	0.007	0.000	0.004	304.061	0.519	0.5203485E-04	0.2726653	0.3889290E-03	-0.1542404
06122011	19	0.011	0.001	0.002	0.000	0.000	0.000	0.001	0.000	0.006	0.000	0.004	303.339	0.519	NaN	0.2918726	0.1233024E-03	0.3742218
06122011	20	0.019	0.001	0.002	0.000	0.000	0.000	0.001	0.000	0.006	0.000	0.004	301.147	0.579	NaN	0.3624629	0.5454652E-04	0.8224965
06122011	21	0.028	0.001	0.002	0.000	0.000	0.000	0.001	0.001	0.006	0.000	0.004	299.463	0.620	NaN	0.3287622	0.1786577E-04	1.264860
06122011	22	0.032	0.001	0.003	0.000	0.000	0.000	0.001	0.001	0.007	0.000	0.005	298.179	0.668	NaN	0.5509130	0.2200801E-04	1.398502
06122011	23	0.033	0.001	0.003	0.000	0.000	0.000	0.001	0.001	0.007	0.000	0.005	297.152	0.724	NaN	0.6706538	0.1979097E-04	1.530031
06122011	24	0.031	0.002	0.003	0.000	0.001	0.000	0.001	0.001	0.008	0.000	0.005	296.294	0.786	NaN	0.9360114	0.1816100E-04	1.712141
06132011	01	0.029	0.002	0.004	0.000	0.001	0.000	0.001	0.001	0.008	0.000	0.006	295.560	0.852	NaN	1.691383	0.2769154E-04	1.785895
06132011	02	0.027	0.003	0.004	0.000	0.001	0.000	0.002	0.001	0.009	0.000	0.007	295.084	0.888	NaN	2.626836	0.3142772E-04	1.922120
06132011	03	0.026	0.004	0.005	0.000	0.001	0.000	0.002	0.002	0.009	0.000	0.008	294.838	0.897	NaN	3.145491	0.3531873E-04	1.949683
06132011	04	0.025	0.004	0.005	0.000	0.001	0.001	0.002	0.002	0.009	0.000	0.009	294.681	0.896	NaN	3.465237	0.3541827E-04	1.990506
06132011	05	0.025	0.006	0.006	0.000	0.002	0.001	0.003	0.003	0.009	0.000	0.010	294.568	0.893	NaN	3.361051	0.2899514E-04	2.064150
06132011	06	0.026	0.007	0.006	0.001	0.002	0.001	0.003	0.004	0.009	0.000	0.012	294.569	0.886	0.4990202E-01	2.433655	0.2226833E-04	2.038571
06132011	07	0.031	0.009	0.009	0.001	0.003	0.001	0.004	0.005	0.009	0.001	0.013	295.581	0.878	0.5494183E-01	2.299747	0.1476709E-04	2.192385
06132011	08	0.030	0.010	0.015	0.001	0.003	0.001	0.005	0.005	0.008	0.001	0.013	298.714	0.790	0.1679790E-01	1.373573	0.1520845E-04	1.955767
06132011	09	0.026	0.058	0.034	0.000	0.004	0.001	0.004	0.005	0.010	0.001	0.015	300.970	0.695	NaN	2.695304	0.5748867E-02	-0.3289745
06132011	10	0.011	0.103	0.037	0.000	0.003	0.000	0.002	0.003	0.016	0.000	0.014	303.211	0.592	NaN	1.264665	0.2549398E-01	-1.304462
06132011	11	0.005	0.062	0.027	0.000	0.001	0.000	0.001	0.001	0.014	0.000	0.010	304.673	0.522	NaN	0.6815637	0.2342641E-01	-1.536199
06132011	12	0.005	0.034	0.018	0.000	0.001	0.000	0.001	0.001	0.012	0.000	0.008	306.395	0.461	NaN	0.4850115	0.1204613E-01	-1.395095
06132011	13	0.005	0.018	0.013	0.000	0.000	0.000	0.001	0.001	0.013	0.000	0.008	308.680	0.391	NaN	0.3586435	0.6605226E-02	-1.265225
06132011	14	0.006	0.008	0.011	0.000	0.000	0.000	0.001	0.001	0.013	0.000	0.008	309.744	0.360	NaN	0.3255319	0.3536877E-02	-1.036026
06132011	15	0.010	0.006	0.009	0.000	0.001	0.000	0.001	0.001	0.012	0.000	0.008	309.229	0.372	NaN	0.3775715	0.5236753E-03	-0.1420630
06132011	16	0.012	0.006	0.008	0.000	0.001	0.000	0.001	0.002	0.011	0.000	0.008	308.480	0.401	NaN	0.3758054	0.1712458E-03	0.3413431
06132011	17	0.013	0.006	0.007	0.000	0.001	0.000	0.001	0.001	0.010	0.000	0.008	307.266	0.439	NaN	0.4721696	0.3313208E-03	0.1538492
06132011	18	0.014	0.009	0.005	0.001	0.001	0.000	0.001	0.002	0.008	0.000	0.007	306.003	0.482	0.2685547E-02	0.3003074	0.5653700E-05	1.725233
06132011	19	0.016	0.009	0.003	0.001	0.001	0.000	0.001	0.002	0.006	0.000	0.006	304.331	0.560	0.3670812E-02	0.3018088	0.4672578E-05	1.810175
06132011	20	0.014	0.006	0.002	0.002	0.001	0.000	0.002	0.003	0.005	0.000	0.007	302.379	0.601	0.4716694E-02	0.3194833	0.3980228E-05	1.904540
06132011	21	0.012	0.005	0.002	0.002	0.001	0.001	0.002	0.003	0.003	0.000	0.007	301.162	0.608	0.5252182E-02	0.3965519	0.2788028E-05	2.153003
06132011	22	0.011	0.004	0.001	0.003	0.001	0.001	0.002	0.003	0.002	0.000	0.007	299.920	0.646	0.6995380E-02	0.4463576	0.3116409E-05	2.156029
06132011	23	0.010	0.003	0.001	0.003	0.001	0.001	0.002	0.004	0.001	0.000	0.007	298.782	0.671	0.5600452E-02	0.3681709	0.2228246E-05	2.218086
06132011	24	0.012	0.003	0.002	0.003	0.001	0.001	0.003	0.004	0.000	0.000	0.007	297.924	0.701	0.2851868E-01	0.3962387	0.3114589E-06	3.104556
06142011	01	0.014	0.003	0.002	0.003	0.001	0.001	0.003	0.005	0.000	0.000	0.007	297.019	0.746	0.2395481E-01	0.2687789	0.2412813E-06	3.046871
06142011	02	0.015	0.003	0.002	0.003	0.001	0.001	0.003	0.005	0.000	0.000	0.007	296.372	0.777	0.2980769E-01	0.3096627	0.2815222E-06	3.041376
06142011	03	0.015	0.003	0.002	0.002	0.002	0.001	0.003	0.005	0.000	0.001	0.008	295.994	0.789	0.4966748E-01	0.5363392	0.6361769E-06	2.925862
06142011	04	0.018	0.004	0.003	0.002	0.002	0.001	0.003	0.006	0.000	0.001	0.008	295.714	0.799	0.3240722E-01	0.3447330	0.3500334E-06	2.993373
06142011	05	0.022	0.005	0.003	0.002	0.002	0.001	0.004	0.006	0.000	0.001	0.008	295.489	0.808	0.3393894E-01	0.3391945	0.1730350E-06	3.292315
06142011	06	0.028	0.006	0.003	0.001	0.002	0.001	0.004	0.007	0.000	0.001	0.008	295.361	0.816	0.2226448E-01	0.1802383	0.7943973E-07	3.355809
06142011	07	0.036	0.006	0.005	0.001	0.002	0.001	0.004	0.007	0.000	0.001	0.008	296.248	0.827	0.2063078E-01	0.1949845	0.8955726E-07	3.337899
06142011	08	0.030	0.007	0.006	0.001	0.002	0.001	0.004	0.007	0.000	0.001	0.008	298.858	0.763	0.1008272E-01	0.1287522	0.5334698E-07	3.382645
06142011	09	0.031	0.034	0.020	0.001	0.002	0.001	0.003	0.005	0.003	0.001	0.009	301.310	0.660	0.5691051E-02	0.4657847	0.2375528E-05	2.292425
06142011	10	0.023	0.066	0.026	0.000	0.002	0.000	0.002	0.003	0.011	0.001	0.010	303.730	0.555	NaN	1.218247	0.1866869E-02	-0.1853787
06142011	11	0.012	0.052	0.019	0.000	0.001	0.000	0.001	0.002	0.012	0.000	0.009	305.595	0.475	NaN	0.6545898	0.5385980E-02	-0.9152955
06142011	12	0.009	0.032	0.014	0.000	0.001	0.000	0.001	0.001	0.011	0.000	0.008	307.414	0.404	NaN	0.4268828	0.4605568E-02	-1.032974
06142011	13	0.010	0.023	0.012	0.000	0.001	0.000	0.001	0.001	0.011	0.000	0.008	309.195	0.344	NaN	0.3401335	0.1904795E-02	-0.7481987
06142011	14	0.011	0.019	0.011	0.000	0.001	0.000	0.001	0.001	0.012	0.000	0.009	310.239	0.311	NaN	0.3301427	0.1402603E-02	-0.6282331
06142011	15	0.014	0.016	0.010	0.000	0.001	0.000	0.001	0.001	0.012	0.000	0.009	310.206	0.305	NaN	0.3351674	0.3548710E-03	-0.2480874E-01
06142011	16	0.016	0.012	0.009	0.000	0.001	0.000	0.001	0.001	0.012	0.000	0.008	309.780	0.314	NaN	0.2990118	0.1078042E-03	0.4430527
06142011	17	0.013	0.008	0.008	0.000	0.001	0.000	0.001	0.002	0.013	0.000	0.009	306.955	0.393	NaN	0.4076928	0.1853468E-03	0.3423480
06142011	18	0.010	0.005	0.005	0.001	0.001	0.000	0.001	0.002	0.013	0.000	0.009	304.495	0.497	0.4454255E-02	0.4466285	0.1045906E-04	1.630454
06142011	19	0.015	0.004	0.003	0.001	0.001	0.000	0.001	0.002	0.013	0.000	0.009	304.072	0.456	0.5293906E-02	0.3979647	0.8166150E-05	1.687827
06142011	20	0.022	0.006	0.004	0.002	0.001	0.000	0.002	0.002	0.013	0.000	0.009	302.336	0.478	0.4944205E-02	0.3999509	0.1016901E-04	1.594728
06142011	21	0.030	0.008	0.005	0.001	0.001	0.000	0.002	0.003	0.011	0.000	0.009	300.942	0.487	0.4279256E-02	0.3495047	0.1087167E-04	1.507157
06142011	22	0.037	0.010	0.006	0.001	0.001	0.001	0.002	0.003	0.010	0.000	0.010	299.894	0.515	0.5553961E-02	0.5096765	0.1242131E-04	1.613127
06142011	23	0.043	0.012	0.008	0.001	0.001	0.001	0.002	0.003	0.010	0.001	0.010	298.764	0.587	0.5993485E-02	0.6236159	0.2042252E-04	1.484808
06142011	24	0.041	0.012	0.009	0.001	0.001	0.001	0.003	0.003	0.011	0.001	0.010	297.538	0.693	0.9711087E-02	0.8298113	0.1588772E-04	1.717918
06152011	01	0.032	0.010	0.008	0.001	0.001	0.001	0.003	0.002	0.014	0.000	0.011	296.413	0.808	0.2135217E-01	1.653009	0.2918345E-04	1.753139
06152011	02	0.021	0.009	0.006	0.001	0.001	0.000	0.002	0.002	0.017	0.000	0.012	295.837	0.861	0.2617300E-01	2.375390	0.5716243E-04	1.618624
06152011	03	0.015	0.008	0.005	0.001	0.002	0.000	0.002	0.002	0.020	0.000	0.014	295.697	0.859	0.3444427E-01	2.864619	0.6526276E-04	1.642401
06152011	04	0.011	0.006	0.004	0.001	0.002	0.000	0.002	0.001	0.022	0.000	0.015	295.448	0.881	0.4983425E-01	3.853296	0.7349424E-04	1.719579
06152011	05	0.010	0.005	0.003	0.001	0.002	0.000	0.002	0.001	0.024	0.000	0.015	295.362	0.888	0.6009305E-01	4.185513	0.6640717E-04	1.799534
06152011	06	0.011	0.004	0.002	0.001	0.002	0.000	0.002	0.001	0.024	0.000	0.015	295.231	0.908	0.8144879E-01	5.079237	0.5993488E-04	1.928119
06152011	07	0.014	0.003	0.002	0.001	0.002	0.000	0.002	0.001	0.024	0.000	0.015	296.386	0.886	0.6742197E-01	4.185513	0.5060562E-04	1.917550
06152011	08	0.013	0.003	0.003	0.001	0.002	0.000	0.002	0.001	0.022	0.000	0.014	298.593	0.838	0.3795320E-01	2.747094	0.4325199E-04	1.802868
06152011	09	0.010	0.010	0.005	0.001	0.003	0.000	0.002	0.001	0.021	0.000	0.014	300.779	0.738	0.1875001E-01	1.772297	0.3812711E-04	1.667302
06152011	10	0.010	0.029	0.009	0.000	0.003	0.000	0.002	0.001	0.022	0.000	0.015	303.005	0.636	NaN	1.629807	0.1388883E-02	0.6947070E-01
06152011	11	0.015	0.034	0.016	0.000	0.002	0.000	0.001	0.001	0.019	0.001	0.013	305.060	0.549	NaN	1.241214	0.2900923E-02	-0.3686896
06152011	12	0.016	0.028	0.022	0.000	0.002	0.000	0.001	0.001	0.017	0.001	0.011	307.087	0.478	NaN	0.9300677	0.4805109E-02	-0.7131886
06152011	13	0.003	0.009	0.015	0.000	0.001	0.000	0.001	0.001	0.018	0.000	0.013	305.492	0.491	0.4313588E-03	0.7150010	0.3499326E-02	-0.6896778
06152011	14	0.001	0.001	0.006	0.000	0.000	0.000	0.000	0.001	0.013	0.000	0.011	306.427	0.458	0.7331371E-05	0.4249355	0.1202531E-02	-0.4517733
06152011	15	0.002	0.000	0.003	0.001	0.000	0.000	0.000	0.000	0.013	0.000	0.009	305.772	0.501	0.000000	0.4834665	0.2758688E-02	-0.7563363
06152011	16	0.003	0.000	0.002	0.000	0.000	0.000	0.000	0.000	0.011	0.000	0.008	305.412	0.495	0.5453825E-04	0.4510111	0.8171276E-03	-0.2581027
06152011	17	0.003	0.000	0.001	0.000	0.000	0.000	0.000	0.000	0.010	0.000	0.006	304.156	0.508	0.2706051E-04	0.3973510	0.1392345E-02	-0.5445727
06152011	18	0.007	0.000	0.001	0.001	0.000	0.000	0.000	0.000	0.010	0.000	0.005	303.036	0.591	0.1374483E-03	0.4163197	0.3625542E-03	0.6005399E-01
06152011	19	0.009	0.000	0.001	0.001	0.000	0.000	0.000	0.000	0.011	0.000	0.006	302.281	0.498	0.1504421E-03	0.3861004	0.3935370E-03	-0.8285306E-02
06152011	20	0.010	0.001	0.001	0.002	0.001	0.000	0.001	0.000	0.013	0.000	0.008	300.357	0.572	0.1525986E-01	0.6253824	0.1096527E-04	1.756126
06152011	21	0.009	0.001	0.001	0.003	0.001	0.000	0.001	0.000	0.014	0.000	0.008	299.670	0.588	0.1553696E-01	0.6631778	0.1290783E-04	1.710777
06152011	22	0.010	0.001	0.001	0.003	0.001	0.000	0.001	0.001	0.015	0.000	0.009	299.883	0.530	0.1363719E-01	0.5569798	0.1172134E-04	1.676862
06152011	23	0.010	0.001	0.001	0.003	0.001	0.000	0.001	0.001	0.015	0.000	0.009	299.016	0.578	0.1587981E-01	0.6440010	0.1368299E-04	1.672705
06152011	24	0.004	0.000	0.001	0.002	0.001	0.000	0.001	0.000	0.016	0.000	0.010	297.648	0.670	0.2760267E-01	1.059806	0.2031803E-04	1.717345
06162011	01	0.001	0.000	0.001	0.001	0.001	0.000	0.001	0.000	0.016	0.000	0.012	297.036	0.704	0.000000	1.255135	0.2868336E-02	-0.3589397
06162011	02	0.001	0.001	0.002	0.001	0.001	0.000	0.001	0.000	0.019	0.000	0.014	296.781	0.703	0.000000	1.458801	0.3435766E-02	-0.3720277
06162011	03	0.002	0.003	0.003	0.002	0.001	0.000	0.001	0.001	0.023	0.000	0.015	296.380	0.724	0.000000	1.723460	0.2635607E-02	-0.1844795
06162011	04	0.003	0.006	0.004	0.003	0.003	0.000	0.001	0.001	0.026	0.000	0.016	296.261	0.722	0.2848411E-01	1.912142	0.6892002E-04	1.443175
06162011	05	0.003	0.005	0.004	0.003	0.002	0.000	0.001	0.001	0.020	0.001	0.014	296.050	0.722	0.6037951E-04	1.645004	0.2297747E-02	-0.1451354
06162011	06	0.002	0.003	0.004	0.002	0.002	0.000	0.001	0.001	0.019	0.001	0.014	295.829	0.725	0.000000	1.647366	0.2587789E-02	-0.1961389
06162011	07	0.002	0.003	0.004	0.002	0.002	0.000	0.001	0.002	0.018	0.001	0.013	295.984	0.764	0.8827448E-04	1.903707	0.2306736E-02	-0.8339766E-01
06162011	08	0.003	0.004	0.004	0.002	0.002	0.000	0.001	0.002	0.017	0.001	0.012	298.090	0.706	0.1540619E-01	1.227911	0.4016566E-04	1.485312
06162011	09	0.002	0.004	0.005	0.001	0.002	0.000	0.001	0.001	0.012	0.001	0.009	299.344	0.661	0.9490311E-02	0.8393939	0.2872578E-04	1.465694
06162011	10	0.002	0.002	0.004	0.001	0.001	0.000	0.001	0.001	0.009	0.000	0.007	300.731	0.633	0.2270937E-04	0.7480665	0.2226002E-02	-0.4735852
06162011	11	0.002	0.002	0.005	0.001	0.001	0.000	0.001	0.001	0.010	0.001	0.007	303.051	0.585	0.4734337E-02	0.4966499	0.1270054E-04	1.592228
06162011	12	0.001	0.003	0.006	0.000	0.001	0.000	0.000	0.001	0.010	0.000	0.007	305.156	0.519	0.3848255E-02	0.4273807	0.2406856E-02	-0.7506353
06162011	13	0.001	0.002	0.006	0.000	0.000	0.000	0.000	0.000	0.009	0.000	0.007	306.854	0.485	0.7390976E-05	0.3310803	0.2818287E-03	0.6994799E-01
06162011	14	0.002	0.001	0.004	0.000	0.000	0.000	0.000	0.000	0.008	0.000	0.006	305.871	0.497	0.2127886E-04	0.3223110	0.6696730E-03	-0.3175876
06162011	15	0.006	0.000	0.003	0.000	0.000	0.000	0.000	0.000	0.006	0.000	0.003	305.145	0.531	0.3045797E-04	0.2103787	0.3187979E-03	-0.1805138
06162011	16	0.008	0.000	0.002	0.000	0.000	0.000	0.000	0.000	0.004	0.000	0.002	305.085	0.504	0.2342463E-04	0.1287001	0.1679434E-03	-0.1155840
06162011	17	0.007	0.000	0.001	0.000	0.000	0.000	0.000	0.000	0.003	0.000	0.001	304.527	0.475	0.1192093E-04	0.6075335E-01	0.8365096E-04	-0.1389008
06162011	18	0.011	0.000	0.001	0.000	0.000	0.000	0.000	0.000	0.002	0.000	0.001	303.280	0.463	0.2115965E-04	0.5727377E-01	0.5600772E-04	0.9707844E-02
06162011	19	0.019	0.000	0.001	0.000	0.000	0.000	0.000	0.000	0.002	0.000	0.001	302.127	0.518	0.6729364E-04	0.6816632E-01	0.2795759E-04	0.3870701
06162011	20	0.026	0.000	0.001	0.000	0.000	0.000	0.000	0.000	0.002	0.000	0.001	300.886	0.563	0.1504421E-03	0.7639419E-01	0.1790975E-04	0.6299708
06162011	21	0.024	0.000	0.001	0.000	0.000	0.000	0.000	0.000	0.001	0.000	0.001	299.697	0.617	0.2282262E-03	0.9090909E-01	0.1745485E-04	0.7166913
06162011	22	0.016	0.000	0.001	0.000	0.000	0.000	0.000	0.000	0.001	0.000	0.001	299.230	0.635	0.1789331E-03	0.9643202E-01	0.2544856E-04	0.5785580
06162011	23	0.010	0.000	0.001	0.000	0.000	0.000	0.000	0.000	0.001	0.000	0.001	298.761	0.679	0.1646280E-03	0.1092896	0.3748269E-04	0.4647481
06162011	24	0.007	0.000	0.000	0.000	0.000	0.000	0.000	0.000	0.001	0.000	0.001	298.039	0.761	NaN	0.1447178	0.7909071E-04	0.2623965
06172011	01	0.003	0.000	0.000	0.000	0.000	0.000	0.000	0.000	0.002	0.000	0.001	297.288	0.858	NaN	0.2386635	0.1076679E-03	0.3456998
06172011	02	0.002	0.000	0.000	0.000	0.000	0.000	0.000	0.000	0.003	0.000	0.002	296.824	0.919	NaN	0.8163266	0.2938853E-03	0.4436860
06172011	03	0.003	0.000	0.000	0.000	0.000	0.000	0.000	0.000	0.003	0.000	0.002	296.623	0.921	NaN	0.8163266	0.2423774E-03	0.5273718
06172011	04	0.004	0.000	0.000	0.000	0.000	0.000	0.000	0.000	0.002	0.000	0.001	296.453	0.925	NaN	0.4672897	0.9504039E-04	0.6916780
06172011	05	0.005	0.000	0.000	0.000	0.000	0.000	0.000	0.000	0.001	0.000	0.001	296.456	0.906	NaN	0.3636364	0.9236395E-04	0.5951648
06172011	06	0.007	0.000	0.000	0.000	0.001	0.000	0.000	0.000	0.001	0.000	0.001	296.490	0.911	NaN	0.3683853	0.1363980E-04	1.431494
06172011	07	0.007	0.000	0.000	0.000	0.001	0.000	0.000	0.000	0.001	0.000	0.001	297.599	0.862	NaN	0.2505654	0.1776266E-04	1.149413
06172011	08	0.005	0.001	0.001	0.000	0.000	0.000	0.000	0.000	0.002	0.000	0.002	299.077	0.811	0.1894832E-03	0.3597122	0.1831166E-03	0.2932274
06172011	09	0.001	0.005	0.005	0.000	0.000	0.000	0.000	0.000	0.006	0.000	0.005	300.129	0.772	0.1113415E-03	0.6998265	0.6022262E-03	0.6523070E-01
06172011	10	0.001	0.014	0.012	0.000	0.001	0.000	0.000	0.000	0.008	0.000	0.006	301.047	0.728	0.000000	0.7368459	0.1918034E-02	-0.4154796
06172011	11	0.001	0.017	0.014	0.000	0.001	0.000	0.000	0.000	0.009	0.000	0.007	301.911	0.691	0.000000	0.7177016	0.2056687E-02	-0.4572243
06172011	12	0.001	0.014	0.013	0.000	0.001	0.000	0.000	0.000	0.009	0.000	0.007	302.395	0.669	0.000000	0.6672099	0.2069107E-02	-0.4915206
06172011	13	0.001	0.012	0.011	0.000	0.000	0.000	0.000	0.000	0.009	0.000	0.007	302.440	0.662	0.4428625E-04	0.6186174	0.6917896E-03	-0.4855188E-01
06172011	14	0.001	0.011	0.011	0.000	0.000	0.000	0.000	0.000	0.010	0.000	0.008	302.315	0.659	0.4452467E-04	0.7145867	0.6955859E-03	0.1170419E-01
06172011	15	0.001	0.009	0.011	0.000	0.000	0.000	0.000	0.000	0.010	0.000	0.010	302.297	0.657	0.2169609E-04	0.9419703	0.5689894E-03	0.2189331
06172011	16	0.000	0.008	0.012	0.000	0.000	0.000	0.000	0.000	0.010	0.000	0.012	302.163	0.656	0.6198883E-05	1.320053	0.2521202E-02	-0.2810161
06172011	17	0.000	0.008	0.011	0.000	0.000	0.000	0.000	0.000	0.011	0.000	0.012	301.762	0.659	0.8583069E-05	1.235842	0.1641236E-02	-0.1232078
06172011	18	0.000	0.009	0.010	0.000	0.001	0.000	0.000	0.001	0.012	0.000	0.013	301.027	0.674	0.2837181E-04	1.207218	0.1369211E-02	-0.5468452E-01
06172011	19	0.001	0.015	0.007	0.000	0.001	0.000	0.000	0.001	0.014	0.000	0.014	299.993	0.699	0.8141994E-04	1.425018	0.1927244E-02	-0.1311161
06172011	20	0.001	0.022	0.004	0.001	0.001	0.000	0.001	0.001	0.018	0.000	0.017	298.361	0.741	0.000000	2.024384	0.2672174E-02	-0.1205719
06172011	21	0.001	0.024	0.003	0.001	0.001	0.000	0.001	0.001	0.023	0.000	0.019	297.516	0.763	0.000000	2.419251	0.3486211E-02	-0.1586727
06172011	22	0.002	0.020	0.003	0.001	0.002	0.000	0.001	0.001	0.025	0.000	0.018	296.821	0.805	0.000000	2.975911	0.3252187E-02	-0.3855552E-01
06172011	23	0.004	0.016	0.003	0.001	0.002	0.000	0.001	0.002	0.022	0.000	0.015	296.412	0.831	0.4054141E-01	2.607123	0.5273725E-04	1.694044
06172011	24	0.006	0.013	0.002	0.001	0.003	0.000	0.001	0.001	0.016	0.000	0.012	296.744	0.805	0.3747040E-01	2.012945	0.3541839E-04	1.754603
06182011	01	0.006	0.011	0.002	0.001	0.003	0.001	0.001	0.001	0.013	0.000	0.010	296.386	0.834	0.3269964E-01	1.861249	0.2651482E-04	1.846316
06182011	02	0.006	0.010	0.001	0.001	0.002	0.001	0.001	0.001	0.012	0.000	0.010	296.104	0.864	0.4870212E-01	2.184005	0.2166363E-04	2.003522
06182011	03	0.006	0.009	0.001	0.001	0.002	0.001	0.002	0.001	0.011	0.000	0.009	295.836	0.891	0.4941219E-01	2.392735	0.1990082E-04	2.080024
06182011	04	0.006	0.008	0.001	0.002	0.002	0.001	0.002	0.001	0.009	0.000	0.008	296.467	0.860	0.3137332E-01	1.695106	0.1629389E-04	2.017172
06182011	05	0.006	0.011	0.003	0.002	0.002	0.001	0.002	0.002	0.007	0.000	0.008	296.422	0.876	0.2045506E-01	1.661313	0.2077606E-04	1.902888
06182011	06	0.005	0.015	0.005	0.002	0.003	0.001	0.002	0.002	0.007	0.001	0.008	296.496	0.886	0.1619828E-01	1.802460	0.2924606E-04	1.789798
06182011	07	0.005	0.018	0.006	0.001	0.003	0.001	0.002	0.002	0.007	0.001	0.009	297.101	0.896	0.1900214E-01	2.286840	0.3601659E-04	1.802733
06182011	08	0.006	0.023	0.010	0.002	0.003	0.000	0.002	0.002	0.009	0.001	0.010	299.218	0.826	0.1114064E-01	1.614294	0.4290963E-04	1.575428
06182011	09	0.006	0.034	0.017	0.002	0.003	0.000	0.002	0.001	0.012	0.002	0.011	301.333	0.743	0.7185102E-02	1.369612	0.5227638E-04	1.418292
06182011	10	0.004	0.038	0.021	0.001	0.003	0.000	0.001	0.001	0.015	0.001	0.011	303.409	0.664	0.4964530E-02	1.062492	0.4564328E-04	1.366949
06182011	11	0.003	0.035	0.022	0.001	0.002	0.000	0.001	0.001	0.013	0.001	0.010	305.451	0.590	0.3238976E-02	0.7646899	0.3011912E-04	1.404643
06182011	12	0.002	0.028	0.018	0.001	0.002	0.000	0.001	0.001	0.011	0.001	0.009	307.212	0.526	0.1907349E-05	0.5753357	0.2900341E-02	-0.7025278
06182011	13	0.002	0.022	0.016	0.001	0.001	0.000	0.001	0.000	0.010	0.001	0.009	307.500	0.487	0.000000	0.4320000	0.1810314E-02	-0.6222703
06182011	14	0.001	0.016	0.013	0.001	0.001	0.000	0.000	0.000	0.010	0.000	0.009	308.483	0.447	0.000000	0.4005638	0.9717763E-03	-0.3848946
06182011	15	0.001	0.006	0.008	0.001	0.001	0.000	0.000	0.000	0.009	0.000	0.008	306.154	0.537	0.000000	0.4885880	0.1266768E-02	-0.4137544
06182011	16	0.003	0.001	0.004	0.001	0.001	0.000	0.000	0.000	0.013	0.000	0.007	305.750	0.518	0.4446507E-04	0.4955470	0.1048530E-02	-0.3254958
06182011	17	0.009	0.000	0.002	0.001	0.001	0.000	0.000	0.000	0.012	0.000	0.007	305.792	0.473	0.7307529E-04	0.4313735	0.5476412E-03	-0.1036427
06182011	18	0.013	0.000	0.001	0.001	0.001	0.000	0.001	0.000	0.011	0.000	0.006	305.011	0.548	0.8671105E-02	0.4415130	0.4185245E-05	2.023223
06182011	19	0.013	0.000	0.001	0.001	0.001	0.000	0.001	0.000	0.012	0.000	0.007	304.015	0.550	0.1085657E-01	0.5157521	0.5629312E-05	1.961986
06182011	20	0.016	0.001	0.002	0.001	0.001	0.000	0.001	0.000	0.012	0.000	0.007	301.995	0.562	0.9305358E-02	0.5309914	0.9824927E-05	1.732758
06182011	21	0.015	0.001	0.002	0.001	0.001	0.000	0.001	0.000	0.013	0.000	0.008	300.471	0.588	0.1259291E-01	0.6631778	0.1393576E-04	1.677499
06182011	22	0.009	0.001	0.001	0.002	0.001	0.000	0.001	0.000	0.013	0.000	0.008	299.223	0.703	0.2146620E-01	0.9369214	0.1425667E-04	1.817685
06182011	23	0.004	0.001	0.001	0.003	0.002	0.000	0.001	0.000	0.015	0.000	0.010	298.525	0.758	0.3044540E-01	1.469554	0.2373799E-04	1.791741
06182011	24	0.002	0.004	0.004	0.004	0.003	0.000	0.001	0.001	0.018	0.000	0.012	300.031	0.680	0.1494235E-01	1.240030	0.3414814E-04	1.560065
06192011	01	0.002	0.011	0.007	0.005	0.003	0.000	0.001	0.002	0.016	0.001	0.014	299.772	0.720	0.000000	1.479735	0.2739229E-02	-0.2674443
06192011	02	0.002	0.013	0.008	0.006	0.004	0.001	0.001	0.002	0.014	0.001	0.014	299.354	0.766	0.000000	1.888299	0.2395141E-02	-0.1032605
06192011	03	0.002	0.013	0.009	0.005	0.004	0.001	0.001	0.003	0.011	0.001	0.012	299.014	0.788	0.1382828E-04	2.232306	0.2475224E-02	-0.4486085E-01
06192011	04	0.003	0.011	0.009	0.004	0.004	0.001	0.002	0.002	0.010	0.001	0.011	298.570	0.799	0.1200885E-01	1.630854	0.4455150E-04	1.563553
06192011	05	0.004	0.009	0.008	0.004	0.004	0.001	0.002	0.002	0.010	0.001	0.011	298.240	0.827	0.1388347E-01	1.864437	0.4482259E-04	1.619051
06192011	06	0.005	0.008	0.007	0.003	0.004	0.001	0.002	0.002	0.009	0.001	0.010	297.928	0.862	0.1499623E-01	1.957573	0.3927297E-04	1.697624
06192011	07	0.006	0.008	0.008	0.002	0.004	0.001	0.002	0.002	0.009	0.001	0.010	298.465	0.876	0.1591831E-01	2.231780	0.4239996E-04	1.721286
06192011	08	0.007	0.009	0.010	0.002	0.003	0.000	0.002	0.002	0.009	0.002	0.009	300.478	0.808	0.8054733E-02	1.282706	0.3292973E-04	1.590539
06192011	09	0.008	0.012	0.014	0.002	0.003	0.000	0.001	0.001	0.010	0.002	0.009	302.103	0.733	0.5929947E-02	1.074454	0.3804564E-04	1.450883
06192011	10	0.007	0.013	0.015	0.002	0.003	0.000	0.001	0.001	0.012	0.001	0.009	303.763	0.658	0.4509389E-02	0.8573639	0.2990461E-04	1.457427
06192011	11	0.005	0.017	0.015	0.002	0.002	0.000	0.001	0.001	0.013	0.001	0.009	305.543	0.583	0.3318131E-02	0.6623024	0.2180760E-04	1.482448
06192011	12	0.003	0.023	0.016	0.001	0.002	0.000	0.001	0.001	0.014	0.001	0.009	307.601	0.495	0.2335548E-02	0.5293597	0.1556927E-04	1.531483
06192011	13	0.002	0.019	0.016	0.001	0.001	0.000	0.001	0.000	0.014	0.001	0.009	308.683	0.439	0.2045929E-02	0.4831634	0.1302744E-04	1.569235
06192011	14	0.002	0.015	0.013	0.001	0.001	0.000	0.000	0.000	0.014	0.000	0.009	309.008	0.396	0.000000	0.4174824	0.3392143E-02	-0.9098360
06192011	15	0.003	0.011	0.010	0.001	0.001	0.000	0.000	0.000	0.013	0.000	0.009	308.813	0.402	0.000000	0.4174824	0.3370489E-02	-0.9070547
06192011	16	0.003	0.006	0.007	0.001	0.001	0.000	0.000	0.000	0.013	0.000	0.010	308.450	0.377	0.000000	0.3785395	0.2955568E-02	-0.8925297
06192011	17	0.003	0.004	0.005	0.001	0.001	0.000	0.001	0.001	0.016	0.000	0.009	308.859	0.361	0.2537429E-02	0.3340771	0.5006694E-05	1.824296
06192011	18	0.006	0.003	0.004	0.001	0.001	0.000	0.001	0.001	0.015	0.000	0.009	308.128	0.392	0.3293157E-02	0.3683948	0.5449851E-05	1.829929
06192011	19	0.009	0.003	0.003	0.001	0.001	0.000	0.001	0.001	0.014	0.000	0.009	306.374	0.405	0.4543722E-02	0.3921747	0.6406819E-05	1.786837
06192011	20	0.011	0.004	0.002	0.002	0.001	0.000	0.001	0.001	0.014	0.000	0.010	303.691	0.453	0.8046567E-02	0.4976480	0.9551929E-05	1.716831
06192011	21	0.011	0.004	0.001	0.003	0.001	0.000	0.001	0.001	0.014	0.000	0.010	303.153	0.451	0.1048547E-01	0.4976480	0.8116344E-05	1.787562
06192011	22	0.006	0.003	0.002	0.003	0.002	0.000	0.001	0.001	0.015	0.000	0.010	302.358	0.515	0.1014674E-01	0.6278779	0.1314672E-04	1.679058
06192011	23	0.003	0.003	0.004	0.003	0.002	0.000	0.001	0.001	0.016	0.000	0.011	300.442	0.642	0.1234066E-01	0.9820778	0.2751137E-04	1.552634
06192011	24	0.003	0.004	0.005	0.002	0.002	0.000	0.001	0.001	0.016	0.000	0.012	299.875	0.686	0.3784895E-04	1.262166	0.2537227E-02	-0.3032429
06202011	01	0.003	0.005	0.005	0.003	0.002	0.000	0.001	0.002	0.016	0.000	0.012	299.368	0.746	0.1551574E-01	1.414994	0.3739837E-04	1.577902
06202011	02	0.003	0.012	0.006	0.003	0.002	0.000	0.001	0.002	0.011	0.001	0.010	299.043	0.784	0.2294779E-04	1.591525	0.2325438E-02	-0.1646914
06202011	03	0.002	0.016	0.008	0.002	0.002	0.000	0.001	0.002	0.007	0.001	0.008	298.827	0.800	0.1102686E-04	1.049785	0.1577531E-02	-0.1768777
06202011	04	0.002	0.016	0.008	0.002	0.002	0.000	0.001	0.002	0.005	0.001	0.007	298.616	0.812	0.7331371E-05	0.9186944	0.1376891E-02	-0.1757286
06202011	05	0.003	0.015	0.007	0.002	0.002	0.000	0.001	0.002	0.004	0.001	0.006	298.370	0.828	0.6862819E-02	0.8142940	0.2090177E-04	1.590598
06202011	06	0.004	0.013	0.006	0.003	0.003	0.000	0.001	0.002	0.002	0.001	0.006	298.091	0.847	0.7688880E-02	0.9218937	0.2124837E-04	1.637355
06202011	07	0.005	0.012	0.006	0.003	0.003	0.001	0.001	0.002	0.001	0.001	0.005	298.641	0.848	0.2336872E-01	0.7554878	0.2433314E-05	2.492029
06202011	08	0.006	0.015	0.008	0.003	0.003	0.001	0.001	0.002	0.000	0.001	0.005	300.580	0.766	0.1274633E-01	0.5532536	0.1946118E-05	2.453755
06202011	09	0.006	0.028	0.015	0.002	0.003	0.000	0.001	0.002	0.002	0.001	0.005	302.248	0.700	0.1958072E-02	0.3887802	0.1265609E-04	1.487405
06202011	10	0.004	0.032	0.020	0.001	0.002	0.000	0.001	0.001	0.004	0.001	0.004	303.916	0.632	0.1297414E-02	0.2980204	0.1048676E-04	1.453605
06202011	11	0.002	0.022	0.017	0.001	0.001	0.000	0.000	0.001	0.006	0.001	0.004	304.367	0.598	0.1400888E-02	0.2752746	0.1178352E-04	1.368491
06202011	12	0.002	0.015	0.014	0.001	0.001	0.000	0.000	0.001	0.006	0.000	0.005	305.976	0.531	0.1626372E-02	0.2988606	0.1053429E-04	1.452863
06202011	13	0.002	0.010	0.012	0.000	0.001	0.000	0.000	0.000	0.006	0.000	0.006	307.633	0.478	0.000000	0.2980656	0.1395297E-02	-0.6703548
06202011	14	0.001	0.005	0.010	0.000	0.001	0.000	0.000	0.000	0.007	0.000	0.006	307.743	0.483	0.000000	0.2980656	0.1395206E-02	-0.6703263
06202011	15	0.002	0.002	0.007	0.000	0.000	0.000	0.000	0.000	0.007	0.000	0.005	305.986	0.510	0.5495548E-04	0.2990771	0.3962940E-03	-0.1222343
06202011	16	0.003	0.001	0.004	0.000	0.000	0.000	0.000	0.000	0.008	0.000	0.005	306.245	0.476	0.1078844E-04	0.3037667	0.1403485E-02	-0.6646675
06202011	17	0.006	0.000	0.003	0.000	0.000	0.000	0.000	0.000	0.007	0.000	0.004	305.260	0.490	0.2789497E-04	0.2501564	0.5038858E-03	-0.3041205
06202011	18	0.010	0.000	0.001	0.000	0.000	0.000	0.001	0.000	0.005	0.000	0.003	303.805	0.675	NaN	0.3502982	0.8707041E-04	0.6045673
06202011	19	0.008	0.000	0.001	0.001	0.000	0.000	0.001	0.000	0.004	0.000	0.003	302.350	0.614	0.5419314E-02	0.2445195	0.2459095E-05	1.997538
06202011	20	0.005	0.000	0.001	0.001	0.000	0.000	0.000	0.000	0.003	0.000	0.002	300.053	0.669	0.8821487E-04	0.2116402	0.1917313E-03	0.4290508E-01
06202011	21	0.003	0.000	0.000	0.001	0.001	0.000	0.000	0.000	0.003	0.000	0.002	299.011	0.701	NaN	0.2510170	0.1715695E-03	0.1652631
06202011	22	0.002	0.000	0.000	0.001	0.001	0.000	0.000	0.000	0.003	0.000	0.002	298.357	0.749	NaN	0.2954189	0.2082152E-03	0.1519258
06202011	23	0.001	0.000	0.001	0.001	0.001	0.000	0.000	0.000	0.004	0.000	0.003	297.759	0.797	0.1350641E-03	0.5302364	0.6496672E-03	-0.8822142E-01
06202011	24	0.002	0.001	0.001	0.002	0.001	0.000	0.000	0.000	0.006	0.000	0.004	297.290	0.832	0.4242063E-03	0.8111064	0.4647776E-03	0.2418327
06212011	01	0.003	0.002	0.001	0.003	0.002	0.000	0.001	0.001	0.006	0.000	0.005	296.957	0.842	0.1573890E-01	0.8596834	0.1129970E-04	1.881272
06212011	02	0.004	0.004	0.001	0.002	0.002	0.000	0.001	0.001	0.004	0.000	0.005	296.930	0.833	0.1669616E-01	0.8142940	0.1012849E-04	1.905237
06212011	03	0.004	0.004	0.001	0.002	0.002	0.000	0.001	0.001	0.003	0.000	0.004	296.956	0.838	0.1270872E-01	0.6487129	0.7458094E-05	1.939425
06212011	04	0.004	0.004	0.001	0.002	0.002	0.000	0.001	0.001	0.002	0.000	0.004	297.032	0.843	0.1256073E-01	0.6487129	0.7225389E-05	1.953191
06212011	05	0.005	0.004	0.001	0.002	0.002	0.000	0.001	0.001	0.001	0.000	0.004	297.075	0.861	0.1352948E-01	0.7282211	0.7559171E-05	1.983789
06212011	06	0.006	0.004	0.001	0.002	0.002	0.000	0.001	0.001	0.001	0.000	0.004	297.126	0.885	0.1557779E-01	0.9036791	0.8304096E-05	2.036722
06212011	07	0.006	0.005	0.001	0.001	0.002	0.000	0.001	0.001	0.001	0.000	0.004	297.958	0.895	0.1812387E-01	0.9860055	0.7157935E-05	2.139091
06212011	08	0.006	0.008	0.001	0.002	0.002	0.000	0.001	0.001	0.001	0.000	0.004	299.652	0.849	0.1140785E-01	0.6853487	0.5907904E-05	2.064478
06212011	09	0.004	0.015	0.003	0.001	0.002	0.000	0.001	0.001	0.002	0.000	0.004	301.169	0.786	0.6025970E-02	0.5128214	0.6509882E-05	1.896393
06212011	10	0.002	0.018	0.005	0.001	0.001	0.000	0.000	0.001	0.004	0.000	0.003	302.444	0.730	0.2672493E-02	0.2760164	0.5862553E-05	1.672848
06212011	11	0.001	0.010	0.004	0.001	0.001	0.000	0.000	0.000	0.003	0.000	0.003	302.200	0.718	0.000000	0.3630447	0.1221812E-02	-0.5270442
06212011	12	0.001	0.002	0.002	0.000	0.000	0.000	0.000	0.000	0.004	0.000	0.004	302.352	0.709	0.2717972E-04	0.4454145	0.3165651E-03	0.1483012
06212011	13	0.001	0.001	0.002	0.000	0.000	0.000	0.000	0.000	0.004	0.000	0.003	303.147	0.680	0.6359816E-04	0.2976136	0.3082923E-03	-0.1531004E-01
06212011	14	0.001	0.000	0.001	0.000	0.000	0.000	0.000	0.000	0.006	0.000	0.003	303.033	0.679	0.3027916E-04	0.3278689	0.7492589E-03	-0.3589317
06212011	15	0.001	0.000	0.001	0.000	0.000	0.000	0.000	0.000	0.005	0.000	0.003	302.332	0.696	0.4839897E-04	0.3500583	0.7350000E-03	-0.3221469
06212011	16	0.001	0.001	0.001	0.000	0.000	0.000	0.000	0.000	0.003	0.000	0.003	301.640	0.711	0.2634525E-04	0.3288643	0.2807073E-03	0.6876311E-01
06212011	17	0.001	0.001	0.001	0.000	0.000	0.000	0.000	0.000	0.003	0.000	0.003	301.030	0.723	0.3004074E-04	0.3421098	0.3017272E-03	0.5455095E-01
06212011	18	0.001	0.002	0.001	0.000	0.000	0.000	0.000	0.000	0.004	0.000	0.004	300.423	0.733	0.3665686E-04	0.4832593	0.3930787E-03	0.8970068E-01
06212011	19	0.001	0.003	0.001	0.000	0.000	0.000	0.000	0.000	0.006	0.000	0.005	299.672	0.744	0.7909536E-04	0.6126953	0.6276917E-03	-0.1050181E-01
06212011	20	0.002	0.004	0.001	0.000	0.000	0.000	0.000	0.000	0.011	0.000	0.006	298.564	0.782	0.4041195E-03	0.9419153	0.7659041E-03	0.8983742E-01
06212011	21	0.007	0.004	0.001	0.000	0.000	0.000	0.001	0.000	0.014	0.000	0.007	297.974	0.806	NaN	1.299176	0.2047319E-03	0.8024824
06212011	22	0.011	0.004	0.001	0.000	0.000	0.000	0.001	0.000	0.014	0.000	0.008	297.528	0.824	NaN	1.562603	0.1776954E-03	0.9441723
06212011	23	0.008	0.004	0.001	0.000	0.001	0.000	0.001	0.000	0.013	0.000	0.008	296.959	0.852	NaN	1.849937	0.2241926E-03	0.9165357
06212011	24	0.005	0.003	0.001	0.000	0.001	0.000	0.001	0.000	0.013	0.000	0.007	296.313	0.888	NaN	2.183154	0.1961309E-03	1.046538
06222011	01	0.003	0.003	0.001	0.000	0.001	0.000	0.001	0.000	0.012	0.000	0.007	295.870	0.913	NaN	2.539618	0.3380382E-03	0.8758026
06222011	02	0.003	0.003	0.001	0.000	0.002	0.000	0.001	0.000	0.011	0.000	0.007	295.424	0.935	NaN	3.840722	0.2841171E-03	1.130916
06222011	03	0.002	0.004	0.001	0.000	0.002	0.000	0.001	0.000	0.010	0.000	0.007	295.433	0.937	NaN	3.819292	0.3004207E-03	1.104253
06222011	04	0.002	0.005	0.001	0.000	0.003	0.000	0.001	0.000	0.010	0.000	0.007	295.424	0.938	NaN	3.819292	0.3038650E-03	1.099302
06222011	05	0.001	0.006	0.002	0.000	0.002	0.000	0.001	0.000	0.009	0.000	0.009	295.360	0.938	0.6258249E-02	4.811527	0.2193080E-02	0.3412284
06222011	06	0.001	0.004	0.002	0.000	0.002	0.000	0.001	0.001	0.009	0.000	0.012	295.269	0.937	0.4024148E-02	5.984952	0.3097761E-02	0.2860127
06222011	07	0.000	0.003	0.002	0.000	0.002	0.000	0.001	0.001	0.010	0.000	0.014	295.294	0.933	0.2332628E-02	6.232133	0.4279578E-02	0.1632358
06222011	08	0.000	0.002	0.003	0.001	0.002	0.000	0.001	0.001	0.011	0.000	0.015	295.790	0.917	0.000000	6.079293	0.4370649E-02	0.1433071
06222011	09	0.000	0.003	0.005	0.001	0.002	0.000	0.001	0.001	0.011	0.000	0.019	297.679	0.875	0.000000	5.604424	0.7136592E-02	-0.1049599
06222011	10	0.000	0.007	0.008	0.000	0.001	0.000	0.000	0.001	0.008	0.000	0.017	299.958	0.805	0.7462502E-04	3.615054	0.8562531E-02	-0.3744874
06222011	11	0.000	0.005	0.006	0.000	0.001	0.000	0.000	0.000	0.004	0.000	0.008	299.386	0.812	0.000000	1.770921	0.3929096E-02	-0.3460936
06222011	12	0.000	0.002	0.004	0.000	0.000	0.000	0.000	0.000	0.004	0.000	0.006	300.792	0.801	0.2521276E-04	1.230638	0.2520581E-02	-0.3113705
06222011	13	0.000	0.000	0.002	0.000	0.000	0.000	0.000	0.000	0.003	0.000	0.004	301.573	0.782	0.1311302E-04	0.7224410	0.1334461E-02	-0.2665036
06222011	14	0.000	0.000	0.002	0.000	0.000	0.000	0.000	0.000	0.003	0.000	0.004	301.705	0.782	0.1287460E-04	0.7224410	0.1332485E-02	-0.2658600
06222011	15	0.000	0.000	0.001	0.000	0.000	0.000	0.000	0.000	0.002	0.000	0.003	301.087	0.800	0.1227856E-04	0.6153187	0.1256824E-02	-0.3101745
06222011	16	0.001	0.000	0.001	0.000	0.000	0.000	0.000	0.000	0.002	0.000	0.002	300.235	0.820	0.1110435E-03	0.3521127	0.2278255E-03	0.1890793
06222011	17	0.001	0.000	0.001	0.000	0.000	0.000	0.000	0.000	0.002	0.000	0.002	299.227	0.850	0.1826882E-03	0.4219410	0.2328007E-03	0.2582674
06222011	18	0.001	0.000	0.001	0.000	0.000	0.000	0.000	0.000	0.003	0.000	0.002	298.659	0.882	0.1848340E-03	0.5509642	0.4037573E-03	0.1350030
06222011	19	0.004	0.000	0.001	0.000	0.000	0.000	0.000	0.000	0.004	0.000	0.002	298.070	0.899	0.7249713E-03	0.6557378	0.1019185E-03	0.8084772
06222011	20	0.005	0.000	0.001	0.000	0.001	0.000	0.000	0.000	0.004	0.000	0.002	297.343	0.916	0.2173901E-02	0.8197138	0.4616631E-04	1.249337
06222011	21	0.006	0.001	0.001	0.000	0.001	0.000	0.000	0.000	0.004	0.000	0.003	297.005	0.925	0.3338337E-02	1.402966	0.8258835E-04	1.230128
06222011	22	0.006	0.001	0.001	0.000	0.001	0.000	0.001	0.000	0.003	0.000	0.003	296.866	0.935	NaN	1.942153	0.8316029E-04	1.368367
06222011	23	0.006	0.001	0.001	0.000	0.001	0.000	0.001	0.000	0.003	0.000	0.003	296.949	0.926	NaN	1.654883	0.8420045E-04	1.293453
06222011	24	0.006	0.001	0.001	0.000	0.002	0.000	0.001	0.000	0.004	0.000	0.003	296.972	0.936	NaN	2.001153	0.4708274E-04	1.628419
06232011	01	0.004	0.001	0.001	0.000	0.001	0.000	0.001	0.000	0.004	0.000	0.004	296.847	0.964	NaN	3.398099	0.2709929E-03	1.098278
06232011	02	0.004	0.001	0.001	0.000	0.001	0.000	0.001	0.000	0.005	0.000	0.004	296.915	0.967	NaN	4.872868	0.2003848E-03	1.385920
06232011	03	0.005	0.000	0.000	0.000	0.001	0.000	0.000	0.000	0.005	0.000	0.003	297.002	0.962	NaN	2.521008	0.7531312E-04	1.524704
06232011	04	0.006	0.000	0.000	0.000	0.001	0.000	0.000	0.000	0.005	0.000	0.003	297.050	0.965	NaN	3.454958	0.6470144E-04	1.727529
06232011	05	0.005	0.000	0.000	0.000	0.001	0.000	0.000	0.000	0.005	0.000	0.004	297.085	0.968	NaN	4.604384	0.1588348E-03	1.462226
06232011	06	0.006	0.001	0.000	0.000	0.002	0.000	0.000	0.000	0.005	0.000	0.004	297.178	0.968	NaN	4.611067	0.9182725E-04	1.700830
06232011	07	0.006	0.002	0.001	0.000	0.003	0.000	0.001	0.000	0.006	0.000	0.005	298.169	0.928	NaN	2.552739	0.1121002E-03	1.357400
06232011	08	0.002	0.007	0.003	0.000	0.002	0.000	0.000	0.000	0.007	0.000	0.005	299.124	0.882	0.7161498E-03	1.396914	0.4803605E-03	0.4636023
06232011	09	0.001	0.005	0.004	0.000	0.001	0.000	0.000	0.000	0.004	0.000	0.003	299.477	0.859	0.1711249E-03	0.7278923	0.5955407E-03	0.8715568E-01
06232011	10	0.001	0.001	0.003	0.000	0.000	0.000	0.000	0.000	0.004	0.000	0.003	300.365	0.835	0.4246235E-03	0.6062274	0.2606626E-03	0.3665568
06232011	11	0.001	0.000	0.002	0.000	0.000	0.000	0.000	0.000	0.004	0.000	0.004	301.013	0.800	0.8326769E-04	0.6646826	0.4690362E-03	0.1514080
06232011	12	0.001	0.000	0.002	0.000	0.000	0.000	0.000	0.000	0.005	0.000	0.004	301.976	0.754	0.8517504E-04	0.5012532	0.4351243E-03	0.6144382E-01
06232011	13	0.001	0.000	0.002	0.000	0.000	0.000	0.000	0.000	0.005	0.000	0.004	302.370	0.718	0.5960464E-04	0.4415011	0.4337147E-03	0.7727641E-02
06232011	14	0.001	0.000	0.002	0.000	0.000	0.000	0.000	0.000	0.005	0.000	0.003	302.442	0.705	0.5000830E-04	0.3618818	0.7280668E-03	-0.3036045
06232011	15	0.003	0.000	0.002	0.000	0.000	0.000	0.000	0.000	0.005	0.000	0.003	302.394	0.693	0.5215406E-04	0.3386005	0.5236996E-03	-0.1893947
06232011	16	0.004	0.000	0.002	0.000	0.000	0.000	0.000	0.000	0.006	0.000	0.003	302.349	0.683	0.8505583E-04	0.3278689	0.3219812E-03	0.7869641E-02
06232011	17	0.005	0.000	0.002	0.000	0.000	0.000	0.000	0.000	0.007	0.000	0.004	301.748	0.701	0.1502037E-03	0.4667445	0.3857216E-03	0.8280528E-01
06232011	18	0.006	0.001	0.002	0.001	0.000	0.000	0.000	0.000	0.009	0.000	0.005	301.195	0.715	0.2934337E-03	0.6242197	0.3651487E-03	0.2328677
06232011	19	0.009	0.001	0.001	0.001	0.000	0.000	0.001	0.000	0.011	0.000	0.006	301.145	0.755	0.1816994E-01	0.8571475	0.8109105E-05	2.024083
06232011	20	0.013	0.001	0.001	0.001	0.001	0.000	0.001	0.001	0.012	0.000	0.007	299.211	0.773	0.2085578E-01	0.9091882	0.1024337E-04	1.948211
06232011	21	0.013	0.002	0.001	0.002	0.001	0.000	0.001	0.001	0.013	0.000	0.008	298.322	0.760	0.2291846E-01	1.018633	0.1479842E-04	1.837803
06232011	22	0.011	0.003	0.001	0.002	0.001	0.000	0.001	0.001	0.014	0.000	0.009	297.626	0.779	0.2828318E-01	1.261349	0.1811991E-04	1.842679
06232011	23	0.009	0.003	0.001	0.002	0.001	0.000	0.001	0.001	0.014	0.000	0.009	296.934	0.817	0.3303874E-01	1.516034	0.2074034E-04	1.863893
06232011	24	0.008	0.002	0.001	0.002	0.002	0.000	0.001	0.001	0.013	0.000	0.009	296.341	0.869	0.4087085E-01	2.056191	0.2441970E-04	1.925323
06242011	01	0.007	0.002	0.001	0.002	0.002	0.000	0.001	0.001	0.012	0.000	0.009	295.864	0.905	0.5192137E-01	2.908003	0.2922689E-04	1.997812
06242011	02	0.007	0.001	0.001	0.001	0.003	0.000	0.001	0.001	0.011	0.000	0.009	295.544	0.933	0.7067835E-01	3.733188	0.2936560E-04	2.104241
06242011	03	0.006	0.001	0.001	0.001	0.004	0.000	0.001	0.001	0.009	0.000	0.009	295.386	0.946	0.8994818E-01	5.284971	0.3644000E-04	2.161464
06242011	04	0.006	0.001	0.001	0.001	0.005	0.000	0.001	0.002	0.008	0.000	0.009	295.250	0.953	0.7908279E-01	4.620541	0.3242666E-04	2.153790
06242011	05	0.006	0.001	0.001	0.001	0.005	0.000	0.001	0.002	0.007	0.000	0.009	295.117	0.955	0.9451020E-01	5.878851	0.3907394E-04	2.177405
06242011	06	0.008	0.001	0.001	0.001	0.006	0.000	0.001	0.002	0.006	0.000	0.009	294.973	0.954	0.7977533E-01	4.618362	0.3327559E-04	2.142362
06242011	07	0.011	0.002	0.001	0.001	0.006	0.000	0.001	0.002	0.006	0.000	0.009	295.799	0.954	0.7667005E-01	4.618362	0.3109994E-04	2.171728
06242011	08	0.011	0.005	0.003	0.002	0.005	0.000	0.001	0.002	0.006	0.000	0.009	297.991	0.872	0.2222341E-01	1.833472	0.2788218E-04	1.817948
06242011	09	0.007	0.010	0.007	0.001	0.003	0.000	0.001	0.002	0.009	0.001	0.009	299.695	0.809	0.1064408E-01	1.293520	0.3209465E-04	1.605341
06242011	10	0.002	0.012	0.010	0.000	0.002	0.000	0.001	0.001	0.012	0.000	0.009	301.456	0.734	NaN	1.108649	0.7460629E-02	-0.8279815
06242011	11	0.002	0.011	0.010	0.000	0.001	0.000	0.001	0.001	0.011	0.000	0.009	303.256	0.664	0.6519556E-03	0.7905117	0.2474773E-02	-0.4956270
06242011	12	0.002	0.011	0.010	0.000	0.001	0.000	0.001	0.001	0.012	0.000	0.008	304.926	0.583	NaN	0.6205306	0.6898496E-02	-1.045991
06242011	13	0.003	0.010	0.009	0.000	0.001	0.000	0.001	0.001	0.012	0.000	0.008	306.402	0.541	NaN	0.5710031	0.4888500E-02	-0.9325371
06242011	14	0.002	0.004	0.007	0.000	0.000	0.000	0.001	0.001	0.013	0.000	0.008	304.422	0.609	NaN	0.6526350	0.4070716E-02	-0.7950004
06242011	15	0.004	0.001	0.004	0.001	0.000	0.000	0.001	0.001	0.012	0.000	0.007	303.428	0.625	0.6148398E-02	0.5426821	0.1001758E-04	1.733783
06242011	16	0.006	0.000	0.003	0.001	0.000	0.000	0.001	0.001	0.012	0.000	0.007	302.851	0.635	0.7472813E-02	0.5601557	0.9456737E-05	1.772568
06242011	17	0.006	0.000	0.002	0.001	0.000	0.000	0.001	0.001	0.011	0.000	0.007	302.587	0.653	0.9370089E-02	0.5786890	0.8181668E-05	1.849603
06242011	18	0.006	0.000	0.002	0.002	0.000	0.000	0.001	0.001	0.012	0.000	0.008	301.598	0.672	0.1167399E-01	0.7244340	0.1173750E-04	1.790423
06242011	19	0.006	0.001	0.002	0.002	0.001	0.000	0.001	0.001	0.013	0.000	0.009	300.484	0.653	0.1376045E-01	0.7955450	0.1541809E-04	1.712634
06242011	20	0.007	0.001	0.002	0.002	0.001	0.000	0.001	0.001	0.013	0.000	0.009	298.465	0.696	0.1776153E-01	0.9369212	0.2075159E-04	1.654652
06242011	21	0.008	0.001	0.002	0.003	0.001	0.000	0.001	0.001	0.011	0.000	0.008	297.871	0.640	0.1312727E-01	0.6746848	0.1802554E-04	1.573213
06242011	22	0.011	0.001	0.002	0.003	0.001	0.000	0.001	0.001	0.010	0.000	0.008	297.199	0.675	0.1475573E-01	0.7672336	0.1956795E-04	1.593382
06242011	23	0.014	0.002	0.002	0.003	0.001	0.000	0.002	0.002	0.009	0.000	0.008	296.854	0.700	0.1282185E-01	0.6893367	0.1560980E-04	1.645034
06242011	24	0.018	0.002	0.003	0.003	0.001	0.000	0.002	0.002	0.009	0.000	0.008	296.369	0.746	0.1285696E-01	0.8295252	0.2024144E-04	1.612588
06252011	01	0.022	0.004	0.004	0.002	0.001	0.001	0.002	0.002	0.007	0.000	0.008	295.794	0.815	0.1469880E-01	1.167378	0.2024493E-04	1.760895
06252011	02	0.026	0.006	0.005	0.002	0.002	0.001	0.002	0.004	0.004	0.001	0.008	295.355	0.865	0.3603441E-01	1.081730	0.4572447E-05	2.373970
06252011	03	0.029	0.010	0.005	0.001	0.002	0.001	0.003	0.005	0.001	0.001	0.008	295.109	0.884	0.9431648E-01	0.9405627	0.9438029E-06	2.998506
06252011	04	0.032	0.012	0.005	0.001	0.002	0.001	0.003	0.006	0.001	0.001	0.008	294.945	0.894	0.7208115E-01	0.6783788	0.5737174E-06	3.072774
06252011	05	0.036	0.012	0.005	0.001	0.002	0.001	0.003	0.006	0.001	0.001	0.008	294.811	0.903	0.8554369E-01	0.7709520	0.6150118E-06	3.098144
06252011	06	0.037	0.011	0.004	0.001	0.002	0.001	0.003	0.005	0.002	0.001	0.008	294.748	0.914	0.1528748	1.302819	0.1012971E-05	3.109287
06252011	07	0.033	0.007	0.003	0.001	0.002	0.001	0.003	0.004	0.004	0.001	0.008	295.775	0.914	0.1017131	1.542697	0.2127088E-05	2.860495
06252011	08	0.019	0.004	0.004	0.001	0.002	0.001	0.002	0.003	0.005	0.001	0.008	297.705	0.857	0.1202726E-01	1.217821	0.1549577E-04	1.895370
06252011	09	0.015	0.010	0.010	0.000	0.002	0.000	0.001	0.003	0.005	0.001	0.007	299.520	0.784	NaN	1.574123	0.1706035E-03	0.9650507
06252011	10	0.014	0.010	0.011	0.000	0.001	0.000	0.001	0.002	0.005	0.001	0.006	301.422	0.707	NaN	1.144700	0.3908077E-03	0.4667287
06252011	11	0.015	0.011	0.012	0.000	0.001	0.000	0.001	0.002	0.006	0.000	0.005	303.178	0.638	NaN	0.7888738	0.8332616E-04	0.9762262
06252011	12	0.016	0.013	0.012	0.000	0.001	0.000	0.001	0.001	0.007	0.000	0.006	304.700	0.579	NaN	0.7698855	0.2144841E-03	0.5550311
06252011	13	0.016	0.013	0.012	0.000	0.001	0.000	0.001	0.002	0.007	0.000	0.006	306.310	0.528	NaN	0.5748010	0.8904609E-04	0.8099026
06252011	14	0.014	0.004	0.011	0.000	0.001	0.000	0.001	0.002	0.010	0.001	0.008	305.438	0.549	NaN	0.7530843	0.3477456E-03	0.3355819
06252011	15	0.012	0.000	0.007	0.000	0.000	0.000	0.001	0.002	0.008	0.000	0.006	304.821	0.575	NaN	0.4991129	0.1002323E-03	0.6971909
06252011	16	0.012	0.000	0.005	0.000	0.000	0.000	0.001	0.001	0.006	0.000	0.005	304.017	0.589	NaN	0.4698296	0.1176269E-03	0.6014338
06252011	17	0.014	0.000	0.005	0.000	0.000	0.000	0.001	0.002	0.004	0.000	0.004	303.788	0.591	NaN	0.3117539	0.2100335E-04	1.171523
06252011	18	0.016	0.001	0.006	0.000	0.001	0.000	0.001	0.002	0.004	0.001	0.005	303.275	0.600	NaN	0.4977385	0.4202609E-04	1.073482
06252011	19	0.017	0.002	0.006	0.001	0.001	0.000	0.001	0.003	0.003	0.001	0.005	302.268	0.645	0.1623333E-02	0.1991235	0.3997154E-05	1.697372
06252011	20	0.020	0.002	0.004	0.001	0.001	0.000	0.002	0.003	0.001	0.001	0.006	300.586	0.688	0.3348172E-02	0.3266097	0.5165810E-05	1.800891
06252011	21	0.024	0.003	0.004	0.002	0.001	0.001	0.002	0.004	0.000	0.001	0.006	299.453	0.709	0.1862466E-01	0.2702537	0.2237129E-06	3.082081
06252011	22	0.026	0.004	0.004	0.002	0.002	0.001	0.002	0.004	0.000	0.001	0.006	298.653	0.743	0.2512193E-01	0.2893130	0.4426763E-06	2.815282
06252011	23	0.024	0.005	0.005	0.002	0.002	0.001	0.003	0.005	0.000	0.001	0.007	298.101	0.781	0.2252644E-01	0.3128391	0.2944014E-06	3.026381
06252011	24	0.018	0.004	0.004	0.002	0.002	0.001	0.003	0.004	0.001	0.001	0.007	297.678	0.844	0.4581636E-01	0.6819937	0.7934295E-06	2.934272
06262011	01	0.010	0.002	0.002	0.002	0.002	0.001	0.002	0.003	0.003	0.000	0.007	297.305	0.893	0.1503909E-01	1.195130	0.9710206E-05	2.090187
06262011	02	0.007	0.001	0.001	0.001	0.002	0.000	0.002	0.002	0.005	0.000	0.006	297.067	0.921	0.2868760E-01	1.620369	0.1044725E-04	2.190612
06262011	03	0.004	0.000	0.001	0.001	0.002	0.000	0.001	0.001	0.006	0.000	0.006	296.989	0.923	0.3768063E-01	2.038062	0.1495334E-04	2.134479
06262011	04	0.003	0.000	0.000	0.001	0.001	0.000	0.001	0.001	0.007	0.000	0.006	296.949	0.919	NaN	2.034674	0.8358083E-05	2.386388
06262011	05	0.004	0.000	0.000	0.001	0.001	0.000	0.001	0.001	0.007	0.000	0.006	296.894	0.915	NaN	2.034674	0.8398588E-05	2.384289
06262011	06	0.005	0.001	0.001	0.001	0.002	0.000	0.001	0.001	0.007	0.000	0.006	296.897	0.905	0.3499371E-01	1.817094	0.1430507E-04	2.103887
06262011	07	0.009	0.003	0.001	0.001	0.002	0.000	0.001	0.001	0.007	0.000	0.006	297.930	0.899	0.3095573E-01	1.641743	0.1247297E-04	2.119335
06262011	08	0.009	0.009	0.003	0.002	0.003	0.000	0.001	0.001	0.007	0.000	0.007	300.291	0.821	0.1379490E-01	1.167267	0.1709777E-04	1.834231
06262011	09	0.003	0.037	0.013	0.001	0.002	0.000	0.001	0.001	0.007	0.000	0.007	301.905	0.754	0.1090765E-04	1.136442	0.2316715E-02	-0.3093252
06262011	10	0.002	0.032	0.017	0.000	0.001	0.000	0.001	0.001	0.007	0.000	0.007	303.643	0.672	0.3510714E-03	0.6060445	0.2023801E-02	-0.5236632
06262011	11	0.002	0.018	0.013	0.000	0.001	0.000	0.000	0.001	0.009	0.000	0.008	305.266	0.592	0.7879734E-04	0.5368573	0.2402169E-02	-0.6507447
06262011	12	0.002	0.004	0.008	0.000	0.000	0.000	0.000	0.001	0.008	0.000	0.007	304.710	0.598	0.5614758E-04	0.4503197	0.2107925E-02	-0.6703342
06262011	13	0.003	0.000	0.003	0.000	0.000	0.000	0.000	0.001	0.009	0.000	0.006	305.521	0.557	NaN	0.3997061	0.1614017E-02	-0.6061674
06262011	14	0.005	0.000	0.002	0.001	0.000	0.000	0.000	0.001	0.008	0.000	0.005	305.729	0.556	0.4430950E-02	0.3055768	0.4091420E-05	1.873246
06262011	15	0.005	0.000	0.002	0.000	0.000	0.000	0.000	0.000	0.007	0.000	0.004	305.123	0.580	0.3772974E-04	0.3236246	0.5508239E-03	-0.2309712
06262011	16	0.005	0.000	0.001	0.000	0.000	0.000	0.000	0.000	0.006	0.000	0.003	304.191	0.611	0.4780293E-04	0.2647838	0.3267959E-03	-0.9138521E-01
06262011	17	0.005	0.000	0.001	0.000	0.000	0.000	0.000	0.000	0.004	0.000	0.003	302.021	0.685	0.7581711E-04	0.3386005	0.3906363E-03	-0.6208504E-01
06262011	18	0.005	0.000	0.001	0.000	0.000	0.000	0.000	0.000	0.004	0.000	0.002	300.496	0.781	0.1791716E-03	0.3139718	0.1360399E-03	0.3632243
06262011	19	0.005	0.002	0.001	0.001	0.000	0.000	0.000	0.000	0.004	0.000	0.003	299.315	0.845	0.3952384E-03	0.6711410	0.2398635E-03	0.4468496
06262011	20	0.005	0.004	0.001	0.001	0.001	0.000	0.001	0.001	0.006	0.000	0.004	297.994	0.860	0.1471299E-01	0.7163192	0.6099414E-05	2.069818
06262011	21	0.004	0.004	0.001	0.001	0.001	0.000	0.001	0.001	0.008	0.000	0.006	297.286	0.877	0.2854460E-01	1.375684	0.1201211E-04	2.058899
06262011	22	0.005	0.003	0.001	0.001	0.001	0.000	0.001	0.001	0.009	0.000	0.006	297.064	0.874	0.2743739E-01	1.277916	0.1186676E-04	2.032170
06262011	23	0.006	0.002	0.001	0.001	0.001	0.000	0.001	0.001	0.007	0.000	0.006	297.051	0.873	0.2745372E-01	1.277916	0.1187741E-04	2.031781
06262011	24	0.007	0.001	0.001	0.002	0.002	0.000	0.001	0.002	0.005	0.000	0.006	297.081	0.852	0.1764327E-01	0.9090623	0.1015906E-04	1.951740
06272011	01	0.009	0.001	0.002	0.003	0.002	0.001	0.002	0.003	0.002	0.000	0.006	297.307	0.827	0.4583144E-01	0.6649535	0.8007162E-06	2.919313
06272011	02	0.009	0.001	0.002	0.003	0.002	0.001	0.002	0.004	0.000	0.000	0.006	297.462	0.810	0.2602988E-01	0.3786931	0.6728277E-06	2.750384
06272011	03	0.007	0.001	0.001	0.005	0.003	0.001	0.003	0.005	0.000	0.001	0.006	297.458	0.825	0.8072913E-02	0.1844196	0.1626776E-06	3.054479
06272011	04	0.005	0.001	0.000	0.006	0.003	0.001	0.003	0.005	0.000	0.002	0.006	297.447	0.828	0.6441891E-02	0.1836894	0.2031854E-06	2.956192
06272011	05	0.005	0.002	0.002	0.005	0.003	0.001	0.002	0.004	0.000	0.000	0.006	297.357	0.844	0.1960337E-01	0.4391884	0.1118173E-05	2.594142
06272011	06	0.005	0.004	0.001	0.004	0.003	0.001	0.002	0.003	0.000	0.000	0.006	297.234	0.853	0.3832173E-01	0.7203790	0.1480433E-05	2.687172
06272011	07	0.007	0.005	0.002	0.003	0.003	0.001	0.002	0.002	0.001	0.000	0.006	297.945	0.867	0.1210439E-01	1.050535	0.9227537E-05	2.056325
06272011	08	0.006	0.009	0.004	0.003	0.003	0.001	0.001	0.002	0.003	0.000	0.006	299.979	0.803	0.7074952E-02	0.7682526	0.9224338E-05	1.920569
06272011	09	0.004	0.023	0.010	0.002	0.002	0.000	0.001	0.001	0.005	0.001	0.006	301.608	0.747	0.4753947E-02	0.7186151	0.2002830E-04	1.554852
06272011	10	0.003	0.029	0.017	0.001	0.002	0.000	0.001	0.001	0.007	0.001	0.006	303.185	0.686	0.2929330E-02	0.5849646	0.2016653E-04	1.462498
06272011	11	0.002	0.028	0.021	0.000	0.001	0.000	0.001	0.001	0.010	0.001	0.007	304.738	0.628	NaN	0.6411356	0.1950924E-01	-1.483291
06272011	12	0.001	0.020	0.018	0.000	0.001	0.000	0.000	0.001	0.010	0.000	0.007	306.187	0.576	0.2403438E-02	0.5037382	0.2559159E-02	-0.7058924
06272011	13	0.002	0.010	0.012	0.000	0.001	0.000	0.000	0.001	0.008	0.000	0.006	306.447	0.559	NaN	0.4279035	0.1049656E-01	-1.389701
06272011	14	0.002	0.002	0.005	0.000	0.000	0.000	0.000	0.000	0.008	0.000	0.005	305.928	0.569	0.2932549E-04	0.3930818	0.1136881E-02	-0.4612321
06272011	15	0.005	0.000	0.002	0.000	0.000	0.000	0.000	0.000	0.006	0.000	0.004	306.608	0.544	0.1740456E-04	0.2886003	0.7597521E-03	-0.4203751
06272011	16	0.008	0.000	0.002	0.000	0.000	0.000	0.000	0.000	0.006	0.000	0.004	307.030	0.504	0.2270937E-04	0.2574003	0.4767609E-03	-0.2676916
06272011	17	0.008	0.000	0.001	0.000	0.000	0.000	0.000	0.000	0.006	0.000	0.003	305.105	0.542	0.4339218E-04	0.2164502	0.2392148E-03	-0.4342998E-01
06272011	18	0.009	0.000	0.001	0.000	0.000	0.000	0.000	0.000	0.005	0.000	0.003	304.037	0.595	0.7498264E-04	0.2570694	0.2099101E-03	0.8801702E-01
06272011	19	0.010	0.000	0.001	0.001	0.000	0.000	0.000	0.000	0.004	0.000	0.003	302.750	0.606	0.1070499E-03	0.2647838	0.1899307E-03	0.1442961
06272011	20	0.010	0.000	0.001	0.001	0.000	0.000	0.000	0.000	0.004	0.000	0.002	300.909	0.702	0.2096891E-03	0.2333723	0.8018557E-04	0.4639530
06272011	21	0.009	0.000	0.000	0.001	0.001	0.000	0.000	0.000	0.003	0.000	0.002	300.534	0.659	NaN	0.2230982	0.7216974E-04	0.4901410
06272011	22	0.007	0.000	0.000	0.002	0.001	0.000	0.000	0.000	0.003	0.000	0.002	299.889	0.723	NaN	0.2671381	0.8122085E-04	0.5170683
06272011	23	0.004	0.000	0.000	0.001	0.001	0.000	0.000	0.000	0.002	0.000	0.002	298.536	0.862	NaN	0.4892288	0.1176430E-03	0.6189460
06272011	24	0.002	0.000	0.000	0.001	0.000	0.000	0.000	0.000	0.002	0.000	0.002	298.268	0.885	NaN	0.5988024	0.4803792E-03	0.9569936E-01
06282011	01	0.002	0.000	0.000	0.000	0.000	0.000	0.000	0.000	0.003	0.000	0.002	298.053	0.909	NaN	0.7272727	0.2976533E-03	0.3879866
06282011	02	0.002	0.001	0.001	0.001	0.001	0.000	0.000	0.000	0.005	0.000	0.003	297.968	0.911	0.9412766E-03	1.095658	0.2054077E-03	0.7270582
06282011	03	0.002	0.005	0.003	0.001	0.001	0.000	0.000	0.000	0.007	0.000	0.005	298.385	0.843	0.3767014E-03	1.068415	0.7876483E-03	0.1324075
06282011	04	0.002	0.008	0.003	0.001	0.002	0.000	0.000	0.001	0.008	0.000	0.006	297.939	0.867	0.1737010E-01	1.300796	0.2018165E-04	1.809252
06282011	05	0.003	0.007	0.003	0.001	0.002	0.000	0.001	0.001	0.007	0.000	0.006	297.693	0.892	0.1901650E-01	1.502481	0.1920059E-04	1.893495
06282011	06	0.004	0.006	0.002	0.001	0.003	0.000	0.001	0.001	0.006	0.000	0.006	297.674	0.900	0.2391422E-01	1.648457	0.1688281E-04	1.989633
06282011	07	0.005	0.006	0.002	0.001	0.003	0.000	0.001	0.001	0.005	0.000	0.006	298.534	0.901	0.2341360E-01	1.648457	0.1633771E-04	2.003886
06282011	08	0.005	0.014	0.006	0.001	0.003	0.000	0.001	0.001	0.004	0.000	0.005	299.666	0.865	0.8779645E-02	1.044185	0.1695426E-04	1.789498
06282011	09	0.003	0.025	0.013	0.001	0.002	0.000	0.001	0.001	0.006	0.000	0.005	300.457	0.825	0.4872561E-02	0.8142940	0.2073203E-04	1.594139
06282011	10	0.001	0.018	0.018	0.000	0.001	0.000	0.000	0.000	0.007	0.000	0.006	300.926	0.794	0.000000	0.9357790	0.1741881E-02	-0.2698452
06282011	11	0.001	0.011	0.016	0.000	0.001	0.000	0.000	0.000	0.009	0.000	0.007	300.651	0.770	0.000000	0.9912201	0.2006107E-02	-0.3061839
06282011	12	0.002	0.006	0.013	0.000	0.000	0.000	0.000	0.000	0.009	0.000	0.007	300.207	0.760	0.2449751E-03	0.9321194	0.8457400E-03	0.4223471E-01
06282011	13	0.001	0.003	0.010	0.000	0.000	0.000	0.000	0.000	0.009	0.000	0.007	300.369	0.744	0.1161098E-03	0.8530800	0.8484424E-03	0.2367422E-02
06282011	14	0.001	0.002	0.008	0.000	0.000	0.000	0.000	0.000	0.010	0.000	0.010	300.462	0.741	0.6091595E-04	1.295794	0.1038678E-02	0.9605473E-01
06282011	15	0.000	0.004	0.010	0.000	0.000	0.000	0.000	0.000	0.011	0.000	0.012	300.360	0.743	0.3415346E-04	1.672426	0.2171010E-02	-0.1133148
06282011	16	0.001	0.007	0.012	0.000	0.000	0.000	0.000	0.000	0.012	0.000	0.012	300.130	0.760	0.8964539E-04	1.701316	0.1442182E-02	0.7176487E-01
06282011	17	0.001	0.008	0.011	0.000	0.000	0.000	0.000	0.001	0.013	0.000	0.011	299.536	0.783	0.2577901E-03	1.464386	0.2275337E-02	-0.1913901
06282011	18	0.001	0.006	0.010	0.000	0.000	0.000	0.000	0.001	0.014	0.000	0.011	298.793	0.802	0.4746318E-03	1.587302	0.2445509E-02	-0.1877098
06282011	19	0.001	0.004	0.008	0.000	0.000	0.000	0.000	0.001	0.015	0.000	0.011	298.013	0.826	0.1050055E-02	1.890944	0.2508861E-02	-0.1227980
06282011	20	0.002	0.003	0.007	0.000	0.000	0.000	0.001	0.001	0.016	0.000	0.012	297.737	0.837	0.2476633E-02	2.229300	0.2541998E-02	-0.5700665E-01
06282011	21	0.002	0.003	0.006	0.000	0.000	0.000	0.001	0.001	0.017	0.000	0.012	297.462	0.853	0.4808724E-02	2.398422	0.2511541E-02	-0.2001464E-01
06282011	22	0.002	0.003	0.006	0.000	0.000	0.000	0.001	0.001	0.018	0.000	0.012	296.806	0.881	0.1410574E-01	2.991421	0.2454753E-02	0.8586957E-01
06282011	23	0.004	0.003	0.005	0.000	0.000	0.000	0.001	0.001	0.020	0.000	0.012	296.332	0.898	NaN	3.969364	0.1410398E-02	0.4493794
06282011	24	0.008	0.003	0.005	0.000	0.000	0.000	0.001	0.001	0.019	0.000	0.011	295.947	0.912	NaN	4.674912	0.3928679E-03	1.075527
06292011	01	0.011	0.003	0.005	0.000	0.000	0.000	0.001	0.001	0.018	0.000	0.011	295.613	0.926	NaN	6.202520	0.2657399E-03	1.368111
06292011	02	0.013	0.002	0.005	0.000	0.000	0.000	0.001	0.001	0.016	0.000	0.010	295.387	0.934	NaN	5.840564	0.1816943E-03	1.507114
06292011	03	0.015	0.002	0.005	0.000	0.000	0.000	0.001	0.001	0.015	0.000	0.009	295.276	0.933	NaN	5.454764	0.1177465E-03	1.665828
06292011	04	0.017	0.002	0.005	0.000	0.000	0.000	0.001	0.001	0.014	0.000	0.009	295.205	0.931	NaN	5.468701	0.1069625E-03	1.708653
06292011	05	0.017	0.003	0.005	0.000	0.000	0.000	0.001	0.001	0.013	0.000	0.008	295.144	0.927	NaN	5.027580	0.8732397E-04	1.760226
06292011	06	0.016	0.006	0.005	0.000	0.001	0.000	0.001	0.001	0.012	0.000	0.008	295.054	0.924	NaN	4.357570	0.8906353E-04	1.689544
06292011	07	0.012	0.014	0.006	0.000	0.001	0.000	0.002	0.001	0.011	0.000	0.008	295.557	0.914	NaN	4.054680	0.1532295E-03	1.422614
06292011	08	0.010	0.043	0.016	0.000	0.001	0.000	0.002	0.001	0.015	0.001	0.010	297.105	0.861	NaN	3.660696	0.4231333E-02	-0.6291350E-01
06292011	09	0.012	0.080	0.026	0.000	0.001	0.000	0.002	0.001	0.027	0.001	0.016	298.846	0.796	NaN	3.734025	0.1067914E-01	-0.4563592
06292011	10	0.010	0.069	0.024	0.000	0.001	0.000	0.001	0.001	0.030	0.001	0.017	300.561	0.734	NaN	2.712068	0.1129333E-01	-0.6195215
06292011	11	0.005	0.054	0.025	0.000	0.001	0.000	0.001	0.001	0.031	0.001	0.018	302.277	0.673	NaN	1.987150	0.1900149E-01	-0.9805570
06292011	12	0.003	0.034	0.023	0.000	0.001	0.000	0.001	0.001	0.028	0.000	0.018	303.775	0.616	0.2298117E-02	1.512224	0.4102182E-02	-0.4333988
06292011	13	0.002	0.023	0.021	0.000	0.001	0.000	0.001	0.001	0.026	0.000	0.020	304.974	0.573	0.8112192E-04	1.232301	0.3694487E-02	-0.4768375
06292011	14	0.001	0.017	0.020	0.000	0.001	0.000	0.001	0.001	0.027	0.000	0.023	305.631	0.548	0.3916025E-04	1.331183	0.2151750E-02	-0.2085541
06292011	15	0.001	0.017	0.020	0.000	0.001	0.000	0.001	0.001	0.029	0.000	0.025	305.609	0.544	0.3576279E-04	1.407231	0.2017007E-02	-0.1563422
06292011	16	0.001	0.019	0.019	0.000	0.001	0.000	0.001	0.001	0.032	0.000	0.025	305.252	0.554	0.5328655E-04	1.423697	0.3056855E-02	-0.3318573
06292011	17	0.002	0.023	0.017	0.000	0.001	0.000	0.001	0.001	0.035	0.000	0.025	304.658	0.564	0.1203418E-03	1.538934	0.4827586E-02	-0.4965099
06292011	18	0.004	0.024	0.014	0.000	0.001	0.000	0.001	0.002	0.037	0.000	0.025	304.015	0.579	0.9355545E-03	1.760757	0.4985513E-02	-0.4520103
06292011	19	0.005	0.016	0.009	0.001	0.001	0.000	0.001	0.002	0.038	0.000	0.024	303.045	0.632	0.8589029E-04	2.246193	0.4741415E-02	-0.3244609
06292011	20	0.006	0.012	0.005	0.002	0.001	0.000	0.001	0.002	0.038	0.000	0.023	303.691	0.453	0.1262456E-01	1.164685	0.3573988E-04	1.513055
06292011	21	0.005	0.010	0.003	0.003	0.001	0.000	0.001	0.002	0.036	0.000	0.021	303.153	0.451	0.1465178E-01	1.053512	0.2774289E-04	1.579488
06292011	22	0.004	0.006	0.002	0.004	0.001	0.000	0.001	0.001	0.031	0.000	0.020	302.358	0.515	0.000000	1.258992	0.4054949E-02	-0.5079623
06292011	23	0.002	0.005	0.002	0.003	0.001	0.000	0.001	0.001	0.025	0.000	0.018	300.442	0.642	0.000000	1.482439	0.3918832E-02	-0.4221798
06292011	24	0.001	0.004	0.002	0.003	0.002	0.000	0.001	0.001	0.022	0.000	0.018	299.875	0.686	0.000000	1.711462	0.3593289E-02	-0.3221248
