# Supplementary material for: Understanding nitrate formation in a world with less sulfate
Source: Copernicus journal article supplement (doi:10.5194/acp-18-12765-2018), 2018-09-05
Supplement: Supplementary file 2 [file acp-18-12765-2018-supplement.zip › DATA/RAW DATA FOR DIURNALS/data_extract_SOAS_mod.csv]

Date	Hour	NH3	SO2	HNO3	CL	NA	MG	K	CA	NH4	NO3	SO4	T	RH	e_NO3	Water	H+	pH
06022011	01	0.040	0.050	0.008	0.004	0.003	0.002	0.006	0.013	0.062	0.002	0.050	297.431	0.808	0.6861556E-01	6.755360	0.1574200E-03	1.632589
06022011	02	0.048	0.052	0.007	0.003	0.003	0.002	0.007	0.014	0.058	0.003	0.049	297.023	0.840	0.1051687	7.523534	0.1059072E-03	1.851496
06022011	03	0.051	0.055	0.007	0.003	0.004	0.002	0.007	0.015	0.054	0.003	0.048	296.787	0.852	0.1252350	7.575661	0.8747118E-04	1.937556
06022011	04	0.051	0.056	0.006	0.003	0.004	0.002	0.008	0.015	0.050	0.003	0.047	296.615	0.858	0.1361246	7.821208	0.7956714E-04	1.992540
06022011	05	0.049	0.054	0.006	0.003	0.004	0.002	0.008	0.015	0.047	0.003	0.046	296.459	0.865	0.1418739	8.124622	0.7818502E-04	2.016680
06022011	06	0.049	0.050	0.005	0.003	0.004	0.002	0.008	0.015	0.044	0.003	0.045	296.365	0.868	0.1389439	7.840990	0.7514069E-04	2.018496
06022011	07	0.049	0.046	0.008	0.003	0.005	0.002	0.009	0.015	0.042	0.003	0.044	297.201	0.871	0.1225600	7.623530	0.6809749E-04	2.049025
06022011	08	0.040	0.041	0.016	0.002	0.005	0.002	0.009	0.015	0.043	0.003	0.043	300.374	0.780	0.2918595E-01	4.499803	0.1031918E-03	1.639548
06022011	09	0.038	0.094	0.032	0.001	0.004	0.002	0.007	0.010	0.063	0.003	0.047	302.310	0.694	0.1624662E-01	4.271229	0.1946537E-03	1.341290
06022011	10	0.014	0.105	0.048	0.000	0.003	0.001	0.004	0.005	0.084	0.002	0.050	304.306	0.603	NaN	4.475232	0.2402228E-01	-0.7297986
06022011	11	0.004	0.066	0.041	0.000	0.002	0.001	0.003	0.003	0.067	0.001	0.045	306.134	0.529	0.9971261E-03	2.781202	0.7312260E-02	-0.4198191
06022011	12	0.003	0.054	0.038	0.000	0.002	0.001	0.003	0.003	0.062	0.001	0.045	307.836	0.468	0.1800060E-03	2.126185	0.6717261E-02	-0.4995911
06022011	13	0.002	0.056	0.037	0.000	0.002	0.000	0.002	0.003	0.061	0.001	0.047	310.087	0.395	0.2610683E-04	1.477147	0.3842774E-02	-0.4152211
06022011	14	0.001	0.032	0.031	0.000	0.001	0.000	0.002	0.002	0.054	0.001	0.053	307.468	0.440	0.1180172E-04	2.107098	0.1081295E-02	0.2897405
06022011	15	0.000	0.009	0.018	0.000	0.001	0.000	0.001	0.002	0.048	0.001	0.059	305.300	0.530	0.2503395E-05	3.946591	0.7880890E-02	-0.3003531
06022011	16	0.000	0.005	0.010	0.001	0.001	0.000	0.001	0.002	0.056	0.000	0.069	306.182	0.528	0.000000	4.696563	0.9979699E-02	-0.3273373
06022011	17	0.000	0.009	0.013	0.001	0.001	0.000	0.002	0.002	0.066	0.000	0.079	306.981	0.471	0.000000	4.273363	0.8594328E-02	-0.3034422
06022011	18	0.000	0.016	0.016	0.001	0.001	0.000	0.002	0.002	0.069	0.000	0.088	306.139	0.519	0.000000	6.027814	0.1506704E-01	-0.3978682
06022011	19	0.000	0.021	0.016	0.001	0.001	0.000	0.002	0.002	0.075	0.000	0.097	304.488	0.557	0.000000	7.669763	0.1875134E-01	-0.3882504
06022011	20	0.000	0.027	0.016	0.001	0.001	0.000	0.002	0.002	0.084	0.000	0.107	302.434	0.567	0.000000	8.682358	0.2026595E-01	-0.3681292
06022011	21	0.000	0.032	0.017	0.002	0.002	0.000	0.003	0.002	0.092	0.000	0.113	301.150	0.574	0.000000	8.793199	0.1658592E-01	-0.2755927
06022011	22	0.000	0.037	0.019	0.001	0.002	0.000	0.004	0.002	0.098	0.000	0.115	300.233	0.601	0.000000	9.462791	0.1297585E-01	-0.1371167
06022011	23	0.000	0.040	0.021	0.001	0.002	0.000	0.004	0.002	0.102	0.000	0.114	299.397	0.645	0.000000	10.75686	0.1149066E-01	-0.2865940E-01
06022011	24	0.001	0.042	0.021	0.001	0.002	0.001	0.005	0.002	0.105	0.000	0.111	298.592	0.705	0.000000	12.72097	0.1112568E-01	0.5819346E-01
06032011	01	0.001	0.042	0.020	0.001	0.002	0.001	0.005	0.002	0.107	0.000	0.107	297.763	0.785	0.000000	17.16223	0.1524118E-01	0.5155496E-01
06032011	02	0.001	0.036	0.016	0.001	0.002	0.001	0.005	0.002	0.107	0.001	0.101	297.198	0.838	0.000000	20.83619	0.1638433E-01	0.1043897
06032011	03	0.001	0.028	0.012	0.001	0.002	0.001	0.004	0.003	0.108	0.001	0.095	296.937	0.852	0.000000	20.29058	0.1503467E-01	0.1302007
06032011	04	0.002	0.023	0.009	0.001	0.003	0.001	0.004	0.003	0.109	0.001	0.087	296.834	0.846	0.000000	18.09508	0.1276250E-01	0.1516247
06032011	05	0.002	0.017	0.006	0.001	0.003	0.001	0.004	0.003	0.109	0.001	0.080	296.759	0.835	0.000000	15.36580	0.1108325E-01	0.1418878
06032011	06	0.003	0.012	0.004	0.001	0.003	0.001	0.004	0.003	0.105	0.001	0.072	296.574	0.853	0.000000	14.92251	0.8879974E-02	0.2254303
06032011	07	0.003	0.011	0.004	0.001	0.003	0.001	0.003	0.003	0.102	0.000	0.068	297.472	0.852	0.000000	14.14106	0.8166557E-02	0.2384430
06032011	08	0.003	0.016	0.006	0.001	0.003	0.001	0.003	0.003	0.091	0.000	0.063	300.215	0.747	0.000000	7.926423	0.8651140E-02	-0.3799615E-01
06032011	09	0.001	0.056	0.018	0.001	0.003	0.001	0.002	0.003	0.053	0.001	0.045	302.540	0.659	0.000000	3.864671	0.5339039E-02	-0.1403506
06032011	10	0.001	0.074	0.029	0.000	0.002	0.000	0.002	0.003	0.036	0.001	0.035	304.637	0.580	0.6395578E-04	2.204093	0.2338032E-02	-0.2562041E-01
06032011	11	0.001	0.086	0.034	0.000	0.002	0.000	0.001	0.003	0.033	0.001	0.037	307.051	0.489	0.9179115E-05	1.759714	0.1023273E-02	0.2354506
06032011	12	0.000	0.111	0.040	0.000	0.001	0.000	0.001	0.002	0.034	0.001	0.049	309.253	0.416	0.1192093E-06	2.640453	0.1126708E-01	-0.6301329
06032011	13	0.000	0.064	0.032	0.000	0.001	0.000	0.001	0.002	0.032	0.000	0.056	306.985	0.483	0.7152557E-06	4.183750	0.2069701E-01	-0.6943420
06032011	14	0.000	0.028	0.022	0.000	0.001	0.000	0.001	0.002	0.035	0.000	0.062	307.331	0.450	0.5960464E-06	4.346986	0.2364850E-01	-0.7356154
06032011	15	0.000	0.016	0.019	0.000	0.001	0.000	0.001	0.001	0.038	0.000	0.064	308.784	0.408	0.2980232E-06	4.022722	0.2346833E-01	-0.7659622
06032011	16	0.000	0.009	0.015	0.001	0.001	0.000	0.001	0.001	0.040	0.000	0.059	306.083	0.503	0.000000	4.316778	0.1672872E-01	-0.5883030
06032011	17	0.000	0.004	0.011	0.001	0.001	0.000	0.001	0.001	0.043	0.000	0.050	305.923	0.456	0.000000	2.547775	0.4405075E-02	-0.2377923
06032011	18	0.001	0.004	0.009	0.001	0.001	0.000	0.001	0.001	0.054	0.000	0.045	306.065	0.448	0.000000	1.850470	0.1873845E-02	-0.5451653E-02
06032011	19	0.003	0.004	0.009	0.001	0.001	0.000	0.001	0.001	0.068	0.000	0.044	304.308	0.497	0.000000	2.348600	0.8478445E-02	-0.5575072
06032011	20	0.004	0.005	0.009	0.001	0.001	0.000	0.001	0.001	0.072	0.000	0.045	302.108	0.531	0.000000	2.758913	0.8320436E-02	-0.4794081
06032011	21	0.003	0.009	0.009	0.002	0.001	0.000	0.001	0.001	0.072	0.000	0.046	300.930	0.542	0.000000	2.822612	0.9593586E-02	-0.5313299
06032011	22	0.003	0.016	0.011	0.002	0.001	0.000	0.001	0.001	0.074	0.000	0.047	299.920	0.589	0.000000	3.409657	0.9183289E-02	-0.4302875
06032011	23	0.004	0.020	0.011	0.001	0.001	0.000	0.001	0.001	0.076	0.000	0.047	299.080	0.656	0.000000	4.409738	0.7616260E-02	-0.2373290
06032011	24	0.005	0.020	0.011	0.001	0.001	0.000	0.002	0.001	0.080	0.000	0.046	298.310	0.733	0.000000	5.757470	0.5479785E-02	0.2146818E-01
06042011	01	0.011	0.018	0.010	0.001	0.001	0.000	0.002	0.001	0.079	0.001	0.043	297.602	0.813	0.6111860E-01	7.547443	0.2715355E-03	1.443973
06042011	02	0.017	0.016	0.009	0.001	0.001	0.001	0.002	0.002	0.069	0.001	0.038	297.114	0.858	0.6824619E-01	8.604445	0.2354227E-03	1.562875
06042011	03	0.019	0.015	0.009	0.001	0.002	0.001	0.002	0.002	0.059	0.001	0.034	296.851	0.867	0.6498885E-01	8.200649	0.2230757E-03	1.565396
06042011	04	0.022	0.017	0.009	0.001	0.002	0.001	0.003	0.002	0.048	0.001	0.029	296.648	0.871	0.5523533E-01	6.910008	0.1860753E-03	1.569790
06042011	05	0.025	0.019	0.008	0.001	0.002	0.001	0.004	0.003	0.038	0.001	0.026	296.413	0.879	0.5973667E-01	6.346768	0.1320399E-03	1.681847
06042011	06	0.026	0.022	0.008	0.001	0.003	0.001	0.005	0.004	0.033	0.001	0.024	296.455	0.858	0.5278677E-01	4.807293	0.9093341E-04	1.723177
06042011	07	0.026	0.023	0.011	0.001	0.003	0.001	0.006	0.004	0.030	0.001	0.024	297.176	0.862	0.4253674E-01	4.794751	0.9582087E-04	1.699306
06042011	08	0.027	0.031	0.022	0.001	0.004	0.001	0.007	0.005	0.029	0.002	0.026	299.540	0.797	0.1778394E-01	3.637523	0.1250896E-03	1.463585
06042011	09	0.044	0.088	0.042	0.001	0.005	0.001	0.008	0.006	0.036	0.003	0.030	302.067	0.692	0.1091450E-01	2.750710	0.1109027E-03	1.394503
06042011	10	0.027	0.123	0.057	0.000	0.003	0.001	0.006	0.004	0.047	0.002	0.032	304.612	0.581	NaN	3.182666	0.2250941E-01	-0.8495730
06042011	11	0.004	0.119	0.066	0.000	0.002	0.000	0.003	0.002	0.045	0.001	0.031	306.570	0.492	0.4753470E-03	1.657052	0.5965762E-02	-0.5563297
06042011	12	0.001	0.076	0.050	0.000	0.001	0.000	0.002	0.001	0.031	0.000	0.030	306.974	0.482	0.1579523E-04	1.382799	0.1184071E-02	0.6738120E-01
06042011	13	0.000	0.049	0.033	0.001	0.001	0.000	0.002	0.001	0.025	0.000	0.032	306.327	0.502	0.000000	1.896777	0.3398959E-02	-0.2533297
06042011	14	0.000	0.032	0.020	0.001	0.001	0.000	0.002	0.001	0.029	0.000	0.035	307.490	0.456	0.000000	1.720466	0.2340284E-02	-0.1336226
06042011	15	0.001	0.030	0.019	0.001	0.001	0.000	0.002	0.001	0.040	0.000	0.040	308.873	0.404	0.000000	1.372149	0.7405728E-03	0.2678336
06042011	16	0.001	0.054	0.028	0.001	0.001	0.000	0.002	0.001	0.051	0.000	0.040	309.455	0.368	0.000000	1.154845	0.2088567E-02	-0.2573247
06042011	17	0.002	0.034	0.021	0.001	0.001	0.000	0.002	0.001	0.058	0.000	0.040	305.339	0.527	0.000000	2.224591	0.6448457E-02	-0.4622057
06042011	18	0.004	0.020	0.012	0.001	0.001	0.000	0.002	0.001	0.062	0.000	0.041	304.318	0.589	0.000000	2.953130	0.7200003E-02	-0.3870501
06042011	19	0.006	0.024	0.012	0.001	0.001	0.000	0.002	0.002	0.073	0.000	0.043	303.185	0.620	0.1816750E-03	3.705989	0.6329645E-02	-0.2324752
06042011	20	0.014	0.029	0.012	0.002	0.001	0.000	0.002	0.002	0.073	0.001	0.041	301.224	0.603	0.2454054E-01	3.318626	0.1637256E-03	1.306842
06042011	21	0.018	0.027	0.008	0.002	0.002	0.001	0.003	0.003	0.068	0.001	0.040	299.912	0.595	0.2991503E-01	3.210079	0.1389033E-03	1.363803
06042011	22	0.017	0.025	0.006	0.003	0.002	0.001	0.004	0.005	0.063	0.001	0.040	299.793	0.555	0.2863300E-01	2.684812	0.1112048E-03	1.382790
06042011	23	0.018	0.028	0.005	0.004	0.002	0.001	0.004	0.007	0.057	0.001	0.040	298.724	0.633	0.3670454E-01	3.115773	0.1260812E-03	1.392915
06042011	24	0.023	0.029	0.005	0.004	0.003	0.002	0.005	0.008	0.053	0.001	0.040	297.977	0.722	0.4335040E-01	4.105076	0.1236526E-03	1.521118
06052011	01	0.025	0.027	0.005	0.004	0.003	0.002	0.006	0.009	0.049	0.001	0.040	297.526	0.764	0.4693991E-01	4.579364	0.1247569E-03	1.564741
06052011	02	0.028	0.027	0.004	0.003	0.003	0.002	0.007	0.011	0.045	0.001	0.039	296.960	0.831	0.5927759E-01	5.616120	0.1152380E-03	1.687841
06052011	03	0.030	0.029	0.004	0.003	0.004	0.002	0.008	0.012	0.041	0.002	0.039	296.686	0.856	0.7803738E-01	6.483671	0.9757469E-04	1.822484
06052011	04	0.030	0.032	0.004	0.003	0.004	0.002	0.010	0.013	0.037	0.002	0.039	296.464	0.866	0.8986372E-01	6.675739	0.8064379E-04	1.917928
06052011	05	0.030	0.038	0.005	0.003	0.005	0.002	0.011	0.013	0.035	0.002	0.040	296.290	0.871	0.9329152E-01	6.949010	0.8481285E-04	1.913461
06052011	06	0.029	0.045	0.005	0.003	0.005	0.002	0.012	0.014	0.034	0.003	0.041	296.216	0.872	0.9337658E-01	6.954000	0.8333373E-04	1.921414
06052011	07	0.028	0.053	0.008	0.003	0.006	0.002	0.012	0.015	0.034	0.003	0.042	297.107	0.848	0.6624675E-01	6.108370	0.8785052E-04	1.842181
06052011	08	0.034	0.100	0.021	0.002	0.006	0.002	0.012	0.015	0.043	0.004	0.045	299.529	0.761	0.3019416E-01	4.449096	0.1107026E-03	1.604114
06052011	09	0.038	0.215	0.039	0.001	0.005	0.002	0.008	0.010	0.072	0.004	0.053	301.987	0.661	0.1605368E-01	4.495207	0.2564044E-03	1.243824
06052011	10	0.016	0.201	0.045	0.000	0.003	0.001	0.005	0.006	0.083	0.001	0.053	304.848	0.544	NaN	3.779832	0.2275834E-01	-0.7796682
06052011	11	0.004	0.178	0.043	0.000	0.002	0.001	0.004	0.004	0.075	0.000	0.051	306.951	0.457	0.5930066E-03	2.477504	0.7907062E-02	-0.5040008
06052011	12	0.002	0.127	0.036	0.000	0.001	0.000	0.003	0.003	0.064	0.000	0.048	308.640	0.402	0.3194809E-04	1.516475	0.4279960E-02	-0.4506046
06052011	13	0.001	0.094	0.031	0.000	0.001	0.000	0.003	0.002	0.054	0.000	0.045	310.444	0.349	0.9894371E-05	1.161367	0.1776193E-02	-0.1845206
06052011	14	0.001	0.056	0.028	0.000	0.001	0.000	0.003	0.002	0.048	0.000	0.045	310.285	0.338	0.5185604E-05	1.129111	0.9158176E-03	0.9092757E-01
06052011	15	0.001	0.035	0.026	0.000	0.001	0.000	0.003	0.002	0.051	0.000	0.047	308.763	0.376	0.9417534E-05	1.416604	0.1145581E-02	0.9222282E-01
06052011	16	0.001	0.021	0.022	0.000	0.001	0.000	0.004	0.002	0.061	0.000	0.049	306.379	0.433	0.3081560E-04	1.753020	0.2776570E-02	-0.1997217
06052011	17	0.004	0.022	0.019	0.000	0.002	0.000	0.004	0.002	0.074	0.000	0.049	307.691	0.368	0.1257658E-03	1.709417	0.7977446E-02	-0.6690158
06052011	18	0.008	0.037	0.022	0.000	0.002	0.000	0.004	0.002	0.079	0.000	0.049	307.153	0.355	0.2619267E-02	1.895914	0.7958376E-02	-0.6230057
06052011	19	0.005	0.048	0.017	0.000	0.002	0.000	0.004	0.002	0.086	0.000	0.048	305.953	0.366	NaN	1.975286	0.9659369E-02	-0.6893187
06052011	20	0.007	0.028	0.008	0.001	0.002	0.000	0.004	0.003	0.086	0.000	0.049	300.780	0.507	0.3043860E-01	2.993865	0.1400748E-03	1.329872
06052011	21	0.009	0.016	0.006	0.002	0.002	0.001	0.005	0.004	0.084	0.000	0.050	299.128	0.564	0.4251248E-01	3.503081	0.1457765E-03	1.380763
06052011	22	0.013	0.011	0.005	0.003	0.003	0.001	0.007	0.005	0.081	0.000	0.051	298.704	0.562	0.4756582E-01	3.477245	0.1465319E-03	1.375303
06052011	23	0.019	0.012	0.005	0.004	0.004	0.001	0.009	0.006	0.079	0.001	0.052	297.243	0.650	0.5380815E-01	4.551327	0.1787131E-03	1.405982
06052011	24	0.030	0.017	0.005	0.004	0.005	0.001	0.010	0.007	0.077	0.001	0.054	296.522	0.713	0.6602103E-01	5.684538	0.2111567E-03	1.430090
06062011	01	0.040	0.021	0.005	0.004	0.005	0.002	0.012	0.008	0.073	0.001	0.054	295.769	0.806	0.1247091	8.358592	0.1538178E-03	1.735126
06062011	02	0.045	0.025	0.004	0.004	0.006	0.002	0.013	0.010	0.068	0.002	0.055	295.245	0.863	0.2055171	10.90692	0.1157720E-03	1.974098
06062011	03	0.041	0.027	0.004	0.004	0.006	0.002	0.014	0.012	0.064	0.002	0.055	294.869	0.887	0.2599841	13.16154	0.1041092E-03	2.101818
06062011	04	0.035	0.031	0.005	0.004	0.006	0.002	0.015	0.013	0.061	0.003	0.055	294.616	0.895	0.2633869	14.20264	0.1119109E-03	2.103497
06062011	05	0.029	0.035	0.005	0.004	0.007	0.002	0.015	0.014	0.062	0.003	0.056	294.394	0.894	0.2293620	12.88012	0.1234497E-03	2.018430
06062011	06	0.025	0.039	0.006	0.004	0.007	0.002	0.015	0.014	0.064	0.003	0.058	294.218	0.886	0.2055275	13.43969	0.1616917E-03	1.919701
06062011	07	0.023	0.041	0.010	0.004	0.007	0.002	0.015	0.014	0.066	0.004	0.059	295.022	0.889	0.1670845	13.79739	0.1968300E-03	1.845706
06062011	08	0.020	0.049	0.021	0.003	0.007	0.002	0.015	0.014	0.070	0.004	0.060	298.127	0.766	0.3737766E-01	6.991339	0.3064942E-03	1.358138
06062011	09	0.019	0.114	0.043	0.001	0.006	0.002	0.012	0.011	0.085	0.004	0.063	300.552	0.660	0.1985675E-01	5.368019	0.3680239E-03	1.163938
06062011	10	0.006	0.161	0.048	0.001	0.004	0.001	0.008	0.007	0.081	0.002	0.057	303.206	0.530	0.4732609E-04	3.600814	0.6685125E-02	-0.2687089
06062011	11	0.002	0.178	0.048	0.000	0.003	0.001	0.006	0.004	0.063	0.001	0.049	305.513	0.425	0.1170635E-03	1.912009	0.6570161E-02	-0.5360862
06062011	12	0.002	0.146	0.046	0.000	0.003	0.001	0.006	0.003	0.060	0.001	0.048	307.425	0.358	0.3945827E-04	1.398125	0.4573564E-02	-0.5147088
06062011	13	0.001	0.118	0.045	0.000	0.002	0.000	0.006	0.003	0.065	0.000	0.052	309.388	0.298	0.1037121E-04	1.024099	0.2550193E-02	-0.3962310
06062011	14	0.001	0.097	0.043	0.000	0.002	0.000	0.006	0.003	0.068	0.000	0.054	310.515	0.265	0.5364418E-05	0.9083382	0.2173595E-02	-0.3789310
06062011	15	0.002	0.082	0.040	0.000	0.002	0.000	0.005	0.003	0.068	0.000	0.053	310.491	0.260	0.3993511E-05	0.8525339	0.2325394E-02	-0.4357849
06062011	16	0.003	0.079	0.037	0.000	0.002	0.000	0.005	0.003	0.065	0.000	0.049	310.078	0.265	0.8702278E-05	0.9200665	0.3952742E-02	-0.6330792
06062011	17	0.005	0.083	0.035	0.000	0.002	0.000	0.005	0.003	0.065	0.000	0.046	309.257	0.276	0.3623962E-04	1.062366	0.7166779E-02	-0.8290498
06062011	18	0.009	0.090	0.031	0.000	0.002	0.001	0.006	0.004	0.069	0.000	0.044	308.095	0.308	NaN	1.414944	0.1779840E-01	-1.099642
06062011	19	0.022	0.090	0.020	0.001	0.003	0.001	0.006	0.004	0.068	0.001	0.043	305.599	0.389	0.8292675E-02	1.786263	0.7627973E-04	1.369536
06062011	20	0.038	0.086	0.014	0.002	0.003	0.001	0.007	0.006	0.063	0.001	0.043	302.734	0.385	0.1111406E-01	1.675377	0.8725463E-04	1.283324
06062011	21	0.051	0.088	0.011	0.003	0.003	0.001	0.008	0.007	0.059	0.001	0.044	300.909	0.399	0.1418030E-01	1.709872	0.9809533E-04	1.241315
06062011	22	0.053	0.093	0.009	0.004	0.004	0.002	0.010	0.009	0.055	0.001	0.045	299.605	0.438	0.1770031E-01	1.908805	0.9636198E-04	1.296856
06062011	23	0.049	0.094	0.007	0.004	0.004	0.002	0.011	0.011	0.052	0.001	0.046	298.378	0.527	0.2547282E-01	2.401424	0.1076334E-03	1.348522
06062011	24	0.041	0.092	0.005	0.005	0.005	0.002	0.011	0.013	0.049	0.002	0.047	297.420	0.625	0.3354764E-01	3.196064	0.1163617E-03	1.438806
06072011	01	0.031	0.099	0.004	0.005	0.005	0.002	0.011	0.013	0.050	0.002	0.048	296.650	0.695	0.4569530E-01	4.142241	0.1364543E-03	1.482248
06072011	02	0.021	0.096	0.003	0.005	0.005	0.002	0.010	0.013	0.051	0.002	0.048	296.140	0.733	0.5457270E-01	4.610304	0.1418399E-03	1.511931
06072011	03	0.011	0.092	0.003	0.005	0.004	0.002	0.009	0.012	0.058	0.002	0.047	295.919	0.742	0.5701792E-01	4.775051	0.1497103E-03	1.503726
06072011	04	0.007	0.090	0.004	0.005	0.004	0.002	0.007	0.011	0.061	0.001	0.046	295.804	0.743	0.5828434E-01	4.798904	0.1587703E-03	1.480373
06072011	05	0.005	0.082	0.004	0.005	0.004	0.002	0.005	0.009	0.061	0.001	0.045	295.753	0.740	0.000000	6.836179	0.4528917E-02	0.1788190
06072011	06	0.004	0.067	0.004	0.004	0.003	0.001	0.004	0.008	0.059	0.001	0.043	295.773	0.738	0.1686215E-03	5.296456	0.4022928E-02	0.1194431
06072011	07	0.004	0.045	0.004	0.004	0.003	0.001	0.004	0.007	0.058	0.001	0.042	296.500	0.758	0.7069111E-04	5.415107	0.4079164E-02	0.1230358
06072011	08	0.005	0.027	0.006	0.003	0.003	0.001	0.004	0.007	0.057	0.001	0.039	299.752	0.661	0.3944635E-03	4.769409	0.5441567E-02	-0.5725943E-01
06072011	09	0.003	0.026	0.013	0.002	0.002	0.001	0.003	0.004	0.043	0.001	0.033	302.083	0.582	0.000000	2.221071	0.5116395E-02	-0.3624015
06072011	10	0.001	0.032	0.022	0.001	0.002	0.001	0.002	0.002	0.033	0.001	0.028	304.184	0.517	0.000000	1.458534	0.3475107E-02	-0.3770517
06072011	11	0.001	0.022	0.022	0.000	0.001	0.000	0.001	0.001	0.026	0.001	0.024	306.374	0.453	0.1108646E-04	0.9812499	0.1105926E-02	-0.5194655E-01
06072011	12	0.001	0.014	0.020	0.000	0.001	0.000	0.001	0.001	0.021	0.000	0.020	307.988	0.410	0.5960464E-05	0.6953688	0.8887817E-03	-0.1065799
06072011	13	0.000	0.007	0.016	0.000	0.001	0.000	0.001	0.001	0.018	0.000	0.020	306.804	0.436	0.2026558E-05	0.8111576	0.4518267E-03	0.2541334
06072011	14	0.000	0.003	0.010	0.000	0.000	0.000	0.001	0.001	0.017	0.000	0.018	306.419	0.450	0.2205372E-05	0.7275944	0.4304480E-03	0.2279686
06072011	15	0.001	0.002	0.008	0.001	0.001	0.000	0.001	0.001	0.023	0.000	0.020	307.113	0.426	0.000000	0.7393751	0.1384991E-02	-0.2725820
06072011	16	0.002	0.002	0.005	0.001	0.001	0.000	0.001	0.001	0.026	0.000	0.019	305.158	0.502	0.000000	0.9631111	0.4142743E-02	-0.6336116
06072011	17	0.004	0.001	0.004	0.001	0.001	0.000	0.001	0.001	0.032	0.000	0.019	306.346	0.468	0.1076704E-01	1.058717	0.1970779E-04	1.730142
06072011	18	0.004	0.002	0.005	0.001	0.001	0.000	0.001	0.001	0.038	0.000	0.021	305.676	0.437	0.1037842E-01	1.076475	0.2552830E-04	1.624982
06072011	19	0.007	0.002	0.005	0.001	0.001	0.000	0.001	0.001	0.040	0.000	0.022	303.638	0.461	0.1318860E-01	1.199798	0.3596987E-04	1.523169
06072011	20	0.010	0.002	0.004	0.002	0.001	0.000	0.002	0.001	0.041	0.000	0.023	301.913	0.388	0.1381433E-01	0.9948350	0.3625159E-04	1.438424
06072011	21	0.014	0.003	0.004	0.003	0.002	0.000	0.002	0.001	0.042	0.000	0.024	300.619	0.388	0.1578391E-01	1.059370	0.4582563E-04	1.363939
06072011	22	0.013	0.004	0.005	0.003	0.002	0.000	0.002	0.001	0.043	0.000	0.025	299.531	0.430	0.1775736E-01	1.252029	0.6385415E-04	1.292425
06072011	23	0.011	0.005	0.006	0.002	0.002	0.000	0.002	0.001	0.044	0.000	0.026	298.646	0.492	0.2174181E-01	1.556130	0.9017738E-04	1.236948
06072011	24	0.010	0.006	0.006	0.002	0.002	0.000	0.002	0.001	0.045	0.000	0.026	297.839	0.570	0.2611643E-01	1.958312	0.9891648E-04	1.296613
06082011	01	0.011	0.007	0.005	0.002	0.002	0.001	0.002	0.002	0.045	0.000	0.027	297.104	0.656	0.3569067E-01	2.631711	0.9537612E-04	1.440799
06082011	02	0.013	0.007	0.005	0.002	0.002	0.001	0.003	0.002	0.044	0.000	0.027	296.567	0.717	0.4219651E-01	3.178425	0.1056051E-03	1.478527
06082011	03	0.014	0.007	0.004	0.002	0.002	0.001	0.003	0.002	0.043	0.001	0.027	296.214	0.751	0.4635715E-01	3.537553	0.1121762E-03	1.498802
06082011	04	0.015	0.007	0.004	0.002	0.002	0.001	0.003	0.003	0.042	0.001	0.027	295.927	0.778	0.4897583E-01	3.818325	0.1132875E-03	1.527691
06082011	05	0.017	0.006	0.003	0.002	0.003	0.001	0.003	0.003	0.041	0.001	0.027	295.683	0.803	0.5785501E-01	4.177408	0.1076357E-03	1.588951
06082011	06	0.019	0.006	0.003	0.002	0.003	0.001	0.003	0.003	0.041	0.001	0.027	295.536	0.828	0.6427205E-01	4.827085	0.1132913E-03	1.629488
06082011	07	0.022	0.006	0.005	0.002	0.003	0.001	0.004	0.003	0.040	0.001	0.027	296.468	0.838	0.5309236E-01	5.091618	0.1230609E-03	1.616736
06082011	08	0.017	0.007	0.011	0.001	0.003	0.001	0.004	0.003	0.041	0.001	0.028	298.348	0.782	0.3045893E-01	3.980773	0.1396118E-03	1.455045
06082011	09	0.004	0.030	0.021	0.001	0.003	0.001	0.003	0.003	0.050	0.001	0.034	300.236	0.712	0.1033545E-03	3.813846	0.4510115E-02	-0.7282453E-01
06082011	10	0.002	0.043	0.036	0.000	0.003	0.001	0.002	0.003	0.044	0.001	0.037	302.111	0.636	0.3306866E-03	2.892579	0.5374553E-02	-0.2690570
06082011	11	0.000	0.049	0.050	0.000	0.002	0.000	0.002	0.002	0.036	0.001	0.041	303.776	0.571	0.1394749E-04	2.666289	0.1700199E-02	0.1954074
06082011	12	0.000	0.040	0.045	0.000	0.001	0.000	0.001	0.002	0.029	0.001	0.039	305.300	0.522	0.1251698E-05	2.596302	0.6534795E-02	-0.4008768
06082011	13	0.000	0.025	0.030	0.000	0.001	0.000	0.001	0.001	0.022	0.000	0.031	306.496	0.483	0.3576279E-06	1.944774	0.6312852E-02	-0.5113565
06082011	14	0.000	0.015	0.021	0.000	0.001	0.000	0.001	0.001	0.018	0.000	0.027	306.787	0.474	0.2980232E-06	1.695840	0.6262937E-02	-0.5673932
06082011	15	0.000	0.011	0.016	0.000	0.001	0.000	0.001	0.001	0.016	0.000	0.025	306.161	0.489	0.4768372E-06	1.697202	0.6299160E-02	-0.5695491
06082011	16	0.000	0.017	0.015	0.000	0.001	0.000	0.001	0.001	0.016	0.000	0.025	305.160	0.520	0.7748604E-06	1.851316	0.6382878E-02	-0.5375360
06082011	17	0.000	0.035	0.014	0.000	0.001	0.000	0.001	0.001	0.018	0.000	0.027	303.780	0.565	0.1966953E-05	2.214558	0.6565080E-02	-0.4719530
06082011	18	0.000	0.055	0.013	0.000	0.001	0.000	0.001	0.001	0.020	0.000	0.031	302.318	0.613	0.5662441E-05	3.059332	0.8960193E-02	-0.4666907
06082011	19	0.000	0.062	0.010	0.001	0.001	0.000	0.001	0.001	0.022	0.000	0.037	300.808	0.667	0.000000	4.626659	0.1373703E-01	-0.4726253
06082011	20	0.000	0.056	0.008	0.001	0.001	0.000	0.001	0.001	0.026	0.000	0.051	299.173	0.723	0.000000	8.032953	0.2524056E-01	-0.4972238
06082011	21	0.000	0.052	0.007	0.001	0.001	0.000	0.001	0.001	0.029	0.000	0.068	298.039	0.777	0.2035499E-03	13.92280	0.4147458E-01	-0.4740553
06082011	22	0.000	0.047	0.006	0.001	0.001	0.000	0.001	0.001	0.030	0.000	0.083	297.272	0.816	0.4749298E-03	20.69395	0.5744417E-01	-0.4434026
06082011	23	0.000	0.044	0.004	0.001	0.001	0.000	0.001	0.001	0.031	0.000	0.093	296.644	0.852	0.8958578E-03	27.14045	0.6816193E-01	-0.3999249
06082011	24	0.000	0.050	0.004	0.001	0.001	0.000	0.001	0.001	0.031	0.000	0.093	296.070	0.893	0.2017319E-02	34.83746	0.6940962E-01	-0.2993732
06092011	01	0.000	0.058	0.004	0.000	0.001	0.000	0.001	0.001	0.032	0.000	0.087	295.499	0.941	0.7649720E-02	53.78426	0.6425758E-01	-0.7726922E-01
06092011	02	0.000	0.057	0.003	0.000	0.001	0.000	0.003	0.002	0.043	0.000	0.081	295.003	0.970	0.3672689E-01	92.37548	0.4904789E-01	0.2749364
06092011	03	0.000	0.054	0.003	0.000	0.002	0.000	0.004	0.002	0.054	0.000	0.075	294.713	0.984	0.9566915E-01	125.6881	0.3577673E-01	0.5456935
06092011	04	0.001	0.043	0.003	0.000	0.002	0.000	0.004	0.002	0.063	0.000	0.067	294.497	0.990	0.3253554	232.5714	0.2606064E-01	0.9505712
06092011	05	0.001	0.030	0.003	0.001	0.003	0.000	0.005	0.002	0.074	0.000	0.064	294.345	0.990	0.4198614	222.0714	0.1780476E-01	1.095957
06092011	06	0.002	0.031	0.004	0.000	0.003	0.000	0.006	0.002	0.082	0.000	0.059	294.515	0.981	0.3070207	99.20473	0.9423806E-02	1.022306
06092011	07	0.004	0.035	0.006	0.000	0.004	0.000	0.007	0.002	0.090	0.000	0.058	294.864	0.956	0.2383571	46.55993	0.6608072E-02	0.8479376
06092011	08	0.007	0.074	0.013	0.001	0.004	0.000	0.007	0.002	0.084	0.002	0.050	296.780	0.862	0.7525730E-01	11.42244	0.3955235E-03	1.460587
06092011	09	0.003	0.161	0.025	0.000	0.003	0.000	0.004	0.002	0.053	0.000	0.035	299.036	0.758	0.9799778E-02	4.700448	0.4928029E-02	-0.2053404E-01
06092011	10	0.001	0.157	0.024	0.000	0.002	0.000	0.003	0.001	0.039	0.000	0.031	301.256	0.655	0.2686977E-03	2.658797	0.4690456E-02	-0.2465299
06092011	11	0.001	0.141	0.020	0.000	0.001	0.000	0.002	0.001	0.027	0.000	0.027	303.216	0.571	0.3689528E-04	1.734437	0.1452857E-02	0.7693568E-01
06092011	12	0.001	0.096	0.017	0.000	0.001	0.000	0.002	0.001	0.023	0.000	0.024	305.155	0.491	0.1293421E-04	1.146575	0.8899809E-03	0.1100217
06092011	13	0.001	0.060	0.015	0.000	0.001	0.000	0.001	0.001	0.022	0.000	0.021	306.771	0.433	0.7510185E-05	0.7934620	0.9055525E-03	-0.5738751E-01
06092011	14	0.001	0.046	0.015	0.000	0.001	0.000	0.001	0.001	0.024	0.000	0.021	307.544	0.412	0.8344650E-05	0.7206445	0.1255562E-02	-0.2411170
06092011	15	0.001	0.023	0.014	0.000	0.001	0.000	0.001	0.001	0.024	0.000	0.024	305.063	0.488	0.1215935E-04	1.158388	0.9398948E-03	0.9077498E-01
06092011	16	0.001	0.009	0.010	0.000	0.001	0.000	0.001	0.001	0.027	0.000	0.025	303.707	0.552	0.3242493E-04	1.482772	0.1576241E-02	-0.2654840E-01
06092011	17	0.002	0.007	0.009	0.001	0.001	0.000	0.002	0.001	0.031	0.000	0.023	304.165	0.556	0.000000	1.396384	0.4361048E-02	-0.4945859
06092011	18	0.006	0.011	0.007	0.001	0.001	0.000	0.003	0.001	0.038	0.000	0.023	304.135	0.579	0.1466030E-01	1.733588	0.4353735E-04	1.600084
06092011	19	0.014	0.019	0.007	0.001	0.001	0.000	0.003	0.001	0.037	0.000	0.022	303.518	0.601	0.1524025E-01	1.755469	0.4544025E-04	1.586953
06092011	20	0.023	0.025	0.008	0.001	0.002	0.000	0.004	0.002	0.036	0.000	0.023	302.031	0.567	0.1431108E-01	1.600158	0.5358929E-04	1.475085
06092011	21	0.032	0.031	0.009	0.001	0.002	0.000	0.005	0.002	0.037	0.000	0.025	300.747	0.556	0.1544821E-01	1.683326	0.6906168E-04	1.386931
06092011	22	0.040	0.036	0.010	0.001	0.002	0.001	0.006	0.003	0.037	0.000	0.026	299.675	0.590	0.1670939E-01	1.889359	0.7364406E-04	1.409177
06092011	23	0.046	0.040	0.010	0.001	0.003	0.001	0.007	0.004	0.035	0.001	0.026	298.716	0.647	0.2016675E-01	2.184099	0.8383602E-04	1.415842
06092011	24	0.046	0.040	0.009	0.001	0.003	0.001	0.008	0.004	0.033	0.001	0.027	297.936	0.710	0.2740771E-01	2.784805	0.8247446E-04	1.528475
06102011	01	0.041	0.040	0.009	0.001	0.004	0.001	0.009	0.005	0.031	0.001	0.027	297.242	0.774	0.4090762E-01	3.352219	0.6502619E-04	1.712244
06102011	02	0.028	0.037	0.009	0.001	0.004	0.001	0.008	0.006	0.031	0.001	0.028	296.778	0.808	0.3915960E-01	3.985439	0.9597750E-04	1.618307
06102011	03	0.019	0.035	0.010	0.001	0.004	0.001	0.008	0.007	0.030	0.001	0.028	296.617	0.799	0.2962154E-01	3.625044	0.1113855E-03	1.512485
06102011	04	0.015	0.034	0.010	0.002	0.004	0.001	0.007	0.008	0.027	0.001	0.028	296.428	0.797	0.2823687E-01	3.464206	0.1124241E-03	1.488744
06102011	05	0.015	0.038	0.010	0.002	0.004	0.002	0.007	0.010	0.023	0.001	0.028	296.247	0.800	0.2533048E-01	3.167017	0.9132113E-04	1.540079
06102011	06	0.017	0.044	0.011	0.002	0.004	0.002	0.007	0.011	0.018	0.001	0.027	296.366	0.775	0.2013999E-01	2.602703	0.7555629E-04	1.537154
06102011	07	0.018	0.045	0.015	0.002	0.004	0.002	0.007	0.012	0.014	0.002	0.026	297.262	0.773	0.1578993E-01	2.209743	0.5427041E-04	1.609779
06102011	08	0.017	0.048	0.029	0.001	0.004	0.002	0.007	0.012	0.014	0.002	0.026	299.990	0.701	0.7187843E-02	1.731038	0.5737476E-04	1.479586
06102011	09	0.012	0.147	0.046	0.000	0.004	0.001	0.005	0.008	0.036	0.001	0.031	301.915	0.623	NaN	2.630734	0.2942691E-01	-1.048668
06102011	10	0.001	0.165	0.035	0.000	0.002	0.000	0.002	0.003	0.039	0.000	0.036	303.659	0.544	0.5245209E-04	1.946099	0.2417523E-02	-0.9420557E-01
06102011	11	0.000	0.117	0.029	0.000	0.001	0.000	0.001	0.002	0.030	0.000	0.038	305.018	0.506	0.1132488E-05	2.307781	0.4505615E-02	-0.2905595
06102011	12	0.000	0.062	0.022	0.000	0.000	0.000	0.001	0.001	0.023	0.000	0.041	304.352	0.541	0.2086163E-05	3.725415	0.1685146E-01	-0.6554628
06102011	13	0.000	0.026	0.015	0.000	0.000	0.000	0.000	0.001	0.019	0.000	0.042	303.478	0.611	0.6735325E-05	5.055412	0.2353101E-01	-0.6678841
06102011	14	0.000	0.019	0.011	0.001	0.000	0.000	0.000	0.001	0.018	0.000	0.040	304.022	0.624	0.000000	4.947241	0.2248224E-01	-0.6574766
06102011	15	0.000	0.019	0.011	0.001	0.000	0.000	0.000	0.001	0.019	0.000	0.041	305.916	0.497	0.000000	3.727327	0.2185920E-01	-0.7682368
06102011	16	0.000	0.022	0.013	0.001	0.000	0.000	0.000	0.001	0.018	0.000	0.040	305.924	0.471	0.000000	3.421938	0.2175918E-01	-0.8033704
06102011	17	0.000	0.029	0.014	0.000	0.000	0.000	0.000	0.001	0.018	0.000	0.041	304.790	0.485	0.1132488E-05	3.717557	0.2291228E-01	-0.7898107
06102011	18	0.000	0.039	0.012	0.001	0.000	0.000	0.001	0.001	0.022	0.000	0.041	303.300	0.518	0.000000	3.609671	0.1783000E-01	-0.6936839
06102011	19	0.000	0.049	0.011	0.001	0.000	0.000	0.001	0.001	0.024	0.000	0.041	301.541	0.570	0.000000	3.954139	0.1608445E-01	-0.6093544
06102011	20	0.000	0.058	0.009	0.001	0.001	0.000	0.001	0.001	0.026	0.000	0.041	299.719	0.607	0.000000	4.181162	0.1340566E-01	-0.5059913
06102011	21	0.000	0.072	0.008	0.001	0.001	0.000	0.001	0.001	0.028	0.000	0.041	298.367	0.666	0.000000	4.855945	0.1218912E-01	-0.3996985
06102011	22	0.000	0.081	0.008	0.001	0.001	0.000	0.001	0.001	0.030	0.000	0.040	297.873	0.675	0.000000	4.660811	0.9440294E-02	-0.3065240
06102011	23	0.000	0.082	0.010	0.001	0.001	0.000	0.002	0.001	0.033	0.000	0.039	297.328	0.707	0.000000	4.649787	0.5894712E-02	-0.1030295
06102011	24	0.001	0.083	0.016	0.001	0.001	0.000	0.002	0.001	0.037	0.000	0.038	296.900	0.748	0.000000	5.030452	0.5059260E-02	-0.2479978E-02
06112011	01	0.001	0.088	0.026	0.001	0.002	0.000	0.002	0.001	0.041	0.000	0.037	296.447	0.800	0.000000	6.017672	0.6080846E-02	-0.4535479E-02
06112011	02	0.002	0.090	0.035	0.000	0.002	0.001	0.003	0.002	0.046	0.000	0.036	296.117	0.831	0.4441381E-02	6.476286	0.5459078E-02	0.7420673E-01
06112011	03	0.003	0.090	0.040	0.000	0.003	0.001	0.004	0.003	0.051	0.000	0.035	295.834	0.848	0.2751303E-01	7.154836	0.4419445E-02	0.2092320
06112011	04	0.006	0.090	0.038	0.000	0.003	0.001	0.004	0.003	0.053	0.001	0.035	295.594	0.857	NaN	8.257710	0.2525660E-01	-0.4855153
06112011	05	0.012	0.092	0.032	0.000	0.004	0.001	0.005	0.004	0.049	0.002	0.034	295.351	0.863	NaN	9.031443	0.1341400E-01	-0.1718013
06112011	06	0.015	0.097	0.026	0.000	0.004	0.001	0.006	0.004	0.045	0.002	0.032	295.281	0.861	NaN	9.129009	0.6220079E-02	0.1666277
06112011	07	0.018	0.111	0.031	0.000	0.005	0.001	0.007	0.004	0.042	0.002	0.031	295.767	0.859	NaN	9.537398	0.6710798E-02	0.1526558
06112011	08	0.033	0.168	0.045	0.000	0.005	0.001	0.006	0.004	0.042	0.003	0.030	297.920	0.785	NaN	7.616420	0.6580200E-02	0.6351183E-01
06112011	09	0.047	0.215	0.038	0.000	0.004	0.001	0.004	0.003	0.044	0.002	0.028	300.462	0.688	NaN	4.998639	0.3371548E-03	1.171023
06112011	10	0.039	0.210	0.037	0.000	0.002	0.000	0.002	0.002	0.046	0.001	0.027	303.406	0.569	NaN	3.041131	0.1248588E-02	0.3866160
06112011	11	0.021	0.177	0.044	0.000	0.001	0.000	0.001	0.001	0.047	0.000	0.026	306.077	0.468	NaN	1.839504	0.1934077E-01	-1.021773
06112011	12	0.005	0.082	0.036	0.000	0.000	0.000	0.001	0.001	0.039	0.000	0.022	307.962	0.412	NaN	1.050376	0.3063786E-01	-1.464914
06112011	13	0.001	0.032	0.025	0.000	0.000	0.000	0.001	0.000	0.028	0.000	0.026	307.068	0.425	0.6079674E-05	1.015725	0.7182600E-03	0.1504944
06112011	14	0.000	0.007	0.014	0.000	0.000	0.000	0.000	0.000	0.021	0.000	0.025	305.747	0.495	0.5960464E-06	1.634486	0.4240446E-02	-0.4140304
06112011	15	0.000	0.002	0.008	0.000	0.000	0.000	0.001	0.000	0.021	0.000	0.024	306.621	0.471	0.2384186E-06	1.295471	0.2266805E-02	-0.2429864
06112011	16	0.000	0.002	0.007	0.000	0.000	0.000	0.001	0.000	0.020	0.000	0.023	304.354	0.570	0.2682209E-05	1.750062	0.2672781E-02	-0.1839098
06112011	17	0.000	0.002	0.006	0.000	0.000	0.000	0.001	0.000	0.017	0.000	0.020	302.537	0.675	0.1776218E-04	2.254426	0.3384039E-02	-0.1763993
06112011	18	0.000	0.004	0.006	0.000	0.000	0.000	0.001	0.000	0.016	0.000	0.019	301.533	0.767	0.7581711E-04	3.060344	0.4322760E-02	-0.1499909
06112011	19	0.000	0.016	0.007	0.000	0.000	0.000	0.001	0.001	0.018	0.000	0.024	300.768	0.795	0.1327395E-03	4.393081	0.6782702E-02	-0.1886336
06112011	20	0.000	0.043	0.009	0.001	0.001	0.000	0.001	0.001	0.026	0.000	0.035	299.502	0.747	0.000000	5.260022	0.9166346E-02	-0.2412087
06112011	21	0.001	0.054	0.008	0.001	0.001	0.000	0.001	0.001	0.037	0.000	0.040	298.169	0.764	0.000000	5.617952	0.6114110E-02	-0.3675524E-01
06112011	22	0.001	0.061	0.008	0.001	0.001	0.000	0.002	0.001	0.048	0.000	0.041	297.185	0.790	0.000000	6.305065	0.6289708E-02	0.1059043E-02
06112011	23	0.002	0.064	0.008	0.001	0.002	0.000	0.002	0.002	0.055	0.000	0.040	296.447	0.822	0.000000	6.801470	0.6321588E-02	0.3177663E-01
06112011	24	0.004	0.062	0.008	0.001	0.002	0.001	0.003	0.003	0.057	0.000	0.037	295.876	0.855	0.5621314E-03	8.127447	0.3904234E-02	0.3184184
06122011	01	0.011	0.056	0.007	0.001	0.003	0.001	0.004	0.004	0.049	0.001	0.032	295.363	0.890	0.7528174E-01	8.366129	0.2003712E-03	1.620689
06122011	02	0.013	0.049	0.008	0.001	0.003	0.001	0.005	0.005	0.040	0.001	0.029	294.992	0.910	0.7649022E-01	8.694997	0.1813990E-03	1.680634
06122011	03	0.012	0.045	0.009	0.001	0.003	0.001	0.005	0.005	0.033	0.001	0.027	294.712	0.917	0.6834686E-01	8.902948	0.2023593E-03	1.643411
06122011	04	0.011	0.046	0.012	0.001	0.004	0.001	0.005	0.006	0.029	0.001	0.026	294.484	0.921	0.6614202E-01	8.174138	0.1783382E-03	1.661198
06122011	05	0.012	0.050	0.014	0.001	0.004	0.001	0.005	0.006	0.027	0.002	0.025	294.274	0.924	0.7154238E-01	7.885693	0.1539469E-03	1.709469
06122011	06	0.014	0.052	0.016	0.001	0.004	0.001	0.005	0.007	0.025	0.002	0.025	294.192	0.924	0.8081633E-01	7.611310	0.1241748E-03	1.787426
06122011	07	0.018	0.054	0.021	0.001	0.004	0.001	0.005	0.007	0.025	0.003	0.024	295.097	0.924	0.9159672E-01	7.479438	0.8879934E-04	1.925459
06122011	08	0.018	0.049	0.033	0.001	0.004	0.001	0.005	0.007	0.025	0.003	0.024	297.680	0.833	0.2026254E-01	3.469953	0.1155390E-03	1.477595
06122011	09	0.004	0.215	0.073	0.000	0.004	0.001	0.003	0.005	0.031	0.001	0.025	299.654	0.753	0.1205254E-01	3.989115	0.4583707E-02	-0.6034028E-01
06122011	10	0.002	0.199	0.059	0.000	0.003	0.000	0.002	0.003	0.033	0.000	0.026	301.784	0.666	0.7296205E-03	2.272099	0.4607518E-02	-0.3070399
06122011	11	0.002	0.181	0.054	0.000	0.002	0.000	0.001	0.002	0.037	0.000	0.027	303.598	0.583	0.2216101E-03	1.779478	0.5320896E-02	-0.4756922
06122011	12	0.001	0.055	0.032	0.000	0.001	0.000	0.001	0.001	0.031	0.000	0.030	303.553	0.574	0.3522635E-04	1.951530	0.1589291E-02	0.8917179E-01
06122011	13	0.001	0.006	0.013	0.000	0.000	0.000	0.001	0.001	0.025	0.000	0.024	304.455	0.543	0.2044439E-04	1.361874	0.1161847E-02	0.6898768E-01
06122011	14	0.001	0.001	0.007	0.000	0.000	0.000	0.000	0.001	0.017	0.000	0.014	304.355	0.571	0.2831221E-04	0.8314694	0.1796433E-02	-0.3345648
06122011	15	0.001	0.000	0.004	0.001	0.000	0.000	0.000	0.000	0.014	0.000	0.011	304.153	0.569	0.000000	0.7064694	0.1514196E-02	-0.3310886
06122011	16	0.002	0.001	0.004	0.001	0.000	0.000	0.000	0.000	0.013	0.000	0.010	305.453	0.498	0.000000	0.4840271	0.1906173E-02	-0.5952925
06122011	17	0.002	0.001	0.005	0.001	0.000	0.000	0.000	0.000	0.014	0.000	0.010	304.930	0.508	0.000000	0.5340568	0.2730679E-02	-0.7086833
06122011	18	0.002	0.001	0.004	0.000	0.000	0.000	0.000	0.000	0.015	0.000	0.009	304.061	0.519	0.3033280E-03	0.5813309	0.4798082E-03	0.8335573E-01
06122011	19	0.004	0.001	0.005	0.000	0.000	0.000	0.001	0.000	0.016	0.000	0.009	303.339	0.519	NaN	0.6309012	0.2253264E-02	-0.5528507
06122011	20	0.012	0.002	0.005	0.000	0.000	0.000	0.001	0.001	0.016	0.000	0.009	301.147	0.579	NaN	0.7716774	0.2257682E-03	0.5337729
06122011	21	0.020	0.003	0.005	0.000	0.000	0.000	0.001	0.001	0.016	0.000	0.009	299.463	0.620	NaN	0.8926786	0.1038956E-03	0.9340981
06122011	22	0.023	0.003	0.005	0.000	0.000	0.000	0.001	0.001	0.017	0.000	0.010	298.179	0.668	NaN	1.169779	0.1003916E-03	1.066406
06122011	23	0.022	0.004	0.006	0.000	0.000	0.000	0.001	0.001	0.019	0.000	0.011	297.152	0.724	NaN	1.594164	0.1123443E-03	1.151982
06122011	24	0.021	0.005	0.006	0.000	0.001	0.000	0.001	0.001	0.021	0.000	0.012	296.294	0.786	NaN	2.341291	0.1161819E-03	1.304317
06132011	01	0.019	0.006	0.007	0.000	0.001	0.000	0.001	0.001	0.022	0.000	0.013	295.560	0.852	NaN	3.645160	0.1538271E-03	1.374684
06132011	02	0.019	0.008	0.008	0.000	0.001	0.000	0.002	0.001	0.024	0.000	0.015	295.084	0.888	NaN	5.784958	0.1905018E-03	1.482401
06132011	03	0.018	0.009	0.009	0.000	0.001	0.000	0.002	0.002	0.025	0.000	0.016	294.838	0.897	NaN	6.616620	0.2063633E-03	1.506004
06132011	04	0.017	0.012	0.010	0.000	0.002	0.001	0.002	0.003	0.027	0.001	0.018	294.681	0.896	NaN	7.435440	0.2006345E-03	1.568901
06132011	05	0.017	0.015	0.012	0.000	0.002	0.001	0.003	0.004	0.028	0.001	0.020	294.568	0.893	NaN	7.422209	0.2574906E-03	1.459772
06132011	06	0.018	0.018	0.014	0.001	0.003	0.001	0.004	0.004	0.028	0.001	0.022	294.569	0.886	0.6407678E-01	5.513039	0.1051264E-03	1.719679
06132011	07	0.022	0.022	0.020	0.001	0.003	0.001	0.005	0.005	0.028	0.001	0.023	295.581	0.878	0.5943370E-01	5.133064	0.8712052E-04	1.770256
06132011	08	0.023	0.024	0.034	0.001	0.004	0.001	0.005	0.006	0.028	0.002	0.024	298.714	0.790	0.1913381E-01	3.044054	0.1073515E-03	1.452644
06132011	09	0.011	0.142	0.084	0.000	0.004	0.001	0.004	0.006	0.032	0.001	0.027	300.970	0.695	NaN	3.147248	0.7180388E-01	-1.358217
06132011	10	0.002	0.249	0.081	0.000	0.003	0.001	0.002	0.003	0.032	0.000	0.030	303.211	0.592	0.1477599E-03	1.965027	0.3815678E-02	-0.2882032
06132011	11	0.001	0.142	0.055	0.000	0.001	0.000	0.001	0.002	0.023	0.000	0.023	304.673	0.522	0.1990795E-04	1.168510	0.1244947E-02	-0.2751833E-01
06132011	12	0.001	0.076	0.036	0.000	0.001	0.000	0.001	0.001	0.018	0.000	0.018	306.395	0.461	0.8523464E-05	0.7611516	0.8771964E-03	-0.6162567E-01
06132011	13	0.000	0.038	0.026	0.000	0.001	0.000	0.001	0.001	0.018	0.000	0.018	308.680	0.391	0.2980232E-05	0.5829140	0.5511172E-03	0.2436053E-01
06132011	14	0.000	0.018	0.020	0.000	0.000	0.000	0.001	0.001	0.020	0.000	0.019	309.744	0.360	0.1907349E-05	0.5152978	0.4632629E-03	0.4623073E-01
06132011	15	0.001	0.012	0.017	0.000	0.001	0.000	0.001	0.002	0.023	0.000	0.019	309.229	0.372	0.7688999E-05	0.5080557	0.2030479E-02	-0.6016873
06132011	16	0.002	0.012	0.015	0.000	0.001	0.000	0.001	0.002	0.023	0.000	0.019	308.480	0.401	0.1424551E-04	0.6031998	0.2742532E-02	-0.6576906
06132011	17	0.003	0.012	0.013	0.000	0.001	0.000	0.001	0.002	0.023	0.000	0.017	307.266	0.439	0.1739264E-03	0.7454785	0.4191240E-02	-0.7499074
06132011	18	0.004	0.016	0.009	0.001	0.001	0.000	0.001	0.002	0.022	0.000	0.016	306.003	0.482	0.1114607E-04	0.8470876	0.3972782E-02	-0.6711664
06132011	19	0.006	0.016	0.006	0.001	0.001	0.000	0.001	0.002	0.022	0.000	0.015	304.331	0.560	0.9057045E-02	0.9893565	0.2471626E-04	1.602370
06132011	20	0.008	0.013	0.004	0.002	0.001	0.001	0.002	0.003	0.019	0.000	0.014	302.379	0.601	0.1094991E-01	0.9846795	0.1708955E-04	1.760564
06132011	21	0.008	0.011	0.003	0.002	0.001	0.001	0.002	0.003	0.017	0.000	0.014	301.162	0.608	0.1366603E-01	1.014381	0.1758197E-04	1.761134
06132011	22	0.007	0.009	0.002	0.003	0.001	0.001	0.002	0.004	0.016	0.000	0.014	299.920	0.646	0.1629829E-01	1.042779	0.1659659E-04	1.798173
06132011	23	0.007	0.008	0.002	0.003	0.001	0.001	0.003	0.004	0.014	0.000	0.014	298.782	0.671	0.1826316E-01	1.092605	0.1881445E-04	1.763972
06132011	24	0.009	0.007	0.003	0.003	0.001	0.001	0.003	0.005	0.013	0.000	0.014	297.924	0.701	0.1520705E-01	1.088353	0.1979938E-04	1.740118
06142011	01	0.011	0.007	0.003	0.003	0.002	0.001	0.003	0.005	0.012	0.001	0.015	297.019	0.746	0.1805282E-01	1.448416	0.3013993E-04	1.681751
06142011	02	0.012	0.007	0.004	0.002	0.002	0.001	0.003	0.006	0.011	0.001	0.015	296.372	0.777	0.1722574E-01	1.463537	0.3192885E-04	1.661220
06142011	03	0.013	0.008	0.004	0.002	0.002	0.001	0.004	0.006	0.010	0.001	0.015	295.994	0.789	0.1768309E-01	1.512581	0.3067968E-04	1.692868
06142011	04	0.016	0.009	0.004	0.002	0.002	0.001	0.004	0.007	0.010	0.001	0.015	295.714	0.799	0.1625985E-01	1.406638	0.2686678E-04	1.718967
06142011	05	0.020	0.011	0.005	0.001	0.002	0.001	0.004	0.007	0.009	0.001	0.015	295.489	0.808	0.1799089E-01	1.470975	0.2657754E-04	1.743090
06142011	06	0.026	0.014	0.006	0.001	0.002	0.001	0.004	0.008	0.008	0.001	0.015	295.361	0.816	0.2599758E-01	1.365354	0.1384354E-04	1.993998
06142011	07	0.033	0.016	0.009	0.001	0.002	0.001	0.005	0.008	0.006	0.001	0.015	296.248	0.827	0.3139102E-01	1.439682	0.9320861E-05	2.188811
06142011	08	0.027	0.017	0.014	0.001	0.002	0.001	0.005	0.008	0.006	0.001	0.015	298.858	0.763	0.1101238E-01	1.054239	0.1287662E-04	1.913137
06142011	09	0.016	0.085	0.052	0.000	0.003	0.001	0.003	0.006	0.019	0.002	0.019	301.310	0.660	NaN	2.192341	0.3437867E-01	-1.195381
06142011	10	0.004	0.163	0.056	0.000	0.002	0.001	0.002	0.003	0.032	0.001	0.024	303.730	0.555	0.5072594E-02	1.659430	0.4436155E-02	-0.4270477
06142011	11	0.001	0.128	0.037	0.000	0.001	0.000	0.001	0.002	0.024	0.000	0.021	305.595	0.475	0.1972914E-04	0.8835608	0.1923256E-02	-0.3378007
06142011	12	0.001	0.077	0.026	0.000	0.001	0.000	0.001	0.002	0.020	0.000	0.019	307.414	0.404	0.6556511E-05	0.5906936	0.1103067E-02	-0.2712398
06142011	13	0.001	0.054	0.021	0.000	0.001	0.000	0.001	0.002	0.020	0.000	0.019	309.195	0.344	0.3218651E-05	0.4568726	0.9295148E-03	-0.3084611
06142011	14	0.001	0.045	0.020	0.000	0.001	0.000	0.001	0.002	0.022	0.000	0.021	310.239	0.311	0.2205372E-05	0.4418600	0.7690733E-03	-0.2406831
06142011	15	0.001	0.037	0.018	0.000	0.001	0.000	0.001	0.002	0.025	0.000	0.021	310.206	0.305	0.3755093E-05	0.4350686	0.1495416E-02	-0.5362042
06142011	16	0.002	0.030	0.016	0.000	0.001	0.000	0.001	0.002	0.025	0.000	0.020	309.780	0.314	0.6854534E-05	0.4483232	0.2550622E-02	-0.7550550
06142011	17	0.002	0.020	0.014	0.000	0.001	0.000	0.001	0.002	0.026	0.000	0.020	306.955	0.393	0.2151728E-04	0.6554957	0.3870376E-02	-0.7711834
06142011	18	0.002	0.011	0.009	0.001	0.001	0.000	0.001	0.002	0.026	0.000	0.020	304.495	0.497	0.000000	0.9631111	0.4259920E-02	-0.6457251
06142011	19	0.004	0.010	0.007	0.001	0.001	0.000	0.001	0.002	0.029	0.000	0.020	304.072	0.456	0.000000	0.9968315	0.4214357E-02	-0.6261095
06142011	20	0.007	0.013	0.008	0.002	0.001	0.000	0.002	0.002	0.033	0.000	0.021	302.336	0.478	0.1047212E-01	1.128991	0.4657102E-04	1.384575
06142011	21	0.016	0.017	0.010	0.001	0.001	0.001	0.002	0.003	0.032	0.000	0.021	300.942	0.487	0.1019758E-01	1.155498	0.5165708E-04	1.349640
06142011	22	0.023	0.022	0.013	0.001	0.001	0.001	0.003	0.003	0.031	0.000	0.021	299.894	0.515	0.1002014E-01	1.237121	0.6437190E-04	1.283716
06142011	23	0.028	0.025	0.016	0.001	0.001	0.001	0.003	0.003	0.031	0.001	0.021	298.764	0.587	0.1152688E-01	1.518337	0.9664633E-04	1.196183
06142011	24	0.026	0.025	0.017	0.001	0.001	0.001	0.003	0.003	0.034	0.001	0.022	297.538	0.693	0.1538819E-01	2.181733	0.1207985E-03	1.256740
06152011	01	0.019	0.023	0.015	0.001	0.001	0.001	0.003	0.003	0.038	0.001	0.024	296.413	0.808	0.2705812E-01	3.802511	0.1646816E-03	1.363425
06152011	02	0.010	0.021	0.012	0.001	0.001	0.001	0.003	0.002	0.045	0.001	0.027	295.837	0.861	0.4492670E-01	5.967574	0.2056912E-03	1.462582
06152011	03	0.004	0.020	0.009	0.001	0.002	0.000	0.003	0.002	0.051	0.001	0.029	295.697	0.859	0.5565751E-01	6.432998	0.2081717E-03	1.489992
06152011	04	0.004	0.017	0.007	0.001	0.002	0.000	0.002	0.002	0.052	0.000	0.031	295.448	0.881	0.7926035E-01	7.985527	0.2023586E-03	1.596182
06152011	05	0.004	0.014	0.006	0.001	0.002	0.000	0.002	0.001	0.053	0.000	0.032	295.362	0.888	0.000000	9.247960	0.3830552E-02	0.3827846
06152011	06	0.004	0.011	0.005	0.001	0.002	0.000	0.002	0.001	0.054	0.000	0.032	295.231	0.908	0.000000	11.26105	0.3727802E-02	0.4801262
06152011	07	0.004	0.009	0.004	0.001	0.002	0.000	0.002	0.001	0.058	0.001	0.032	296.386	0.886	0.9919441E-01	9.275334	0.1718990E-03	1.732056
06152011	08	0.004	0.009	0.005	0.001	0.002	0.000	0.002	0.001	0.056	0.001	0.031	298.593	0.838	0.6372732E-01	6.333592	0.1431417E-03	1.645884
06152011	09	0.003	0.025	0.011	0.001	0.003	0.000	0.002	0.001	0.046	0.000	0.031	300.779	0.738	0.000000	3.885745	0.5213296E-02	-0.1276381
06152011	10	0.002	0.074	0.022	0.000	0.003	0.000	0.002	0.001	0.041	0.000	0.033	303.005	0.636	0.2120137E-03	2.661855	0.4917181E-02	-0.2665318
06152011	11	0.002	0.085	0.033	0.000	0.003	0.000	0.002	0.002	0.041	0.000	0.031	305.060	0.549	0.1581311E-03	1.840062	0.5511923E-02	-0.4764707
06152011	12	0.003	0.070	0.041	0.000	0.002	0.000	0.001	0.002	0.039	0.001	0.028	307.087	0.478	0.1199245E-03	1.372915	0.5546641E-02	-0.6063863
06152011	13	0.000	0.024	0.027	0.000	0.001	0.000	0.001	0.001	0.024	0.000	0.032	305.492	0.491	0.5364418E-06	1.979974	0.5348599E-02	-0.4315806
06152011	14	0.000	0.003	0.010	0.000	0.000	0.000	0.001	0.001	0.014	0.000	0.026	306.427	0.458	0.2980232E-06	1.891806	0.1031844E-01	-0.7367374
06152011	15	0.000	0.001	0.005	0.001	0.000	0.000	0.000	0.000	0.014	0.000	0.022	305.772	0.501	0.000000	1.779610	0.8378667E-02	-0.6728501
06152011	16	0.000	0.001	0.003	0.000	0.000	0.000	0.000	0.000	0.013	0.000	0.018	305.412	0.495	0.4172325E-06	1.338320	0.5214494E-02	-0.5906523
06152011	17	0.000	0.000	0.002	0.000	0.000	0.000	0.000	0.000	0.011	0.000	0.015	304.156	0.508	0.4768372E-06	1.135104	0.4200353E-02	-0.5682502
06152011	18	0.001	0.000	0.002	0.000	0.000	0.000	0.000	0.000	0.015	0.000	0.013	303.036	0.591	0.2366304E-04	0.9213605	0.5105505E-03	0.2563909
06152011	19	0.001	0.001	0.002	0.001	0.000	0.000	0.000	0.000	0.018	0.000	0.015	302.281	0.498	0.000000	0.7595621	0.1010783E-02	-0.1240944
06152011	20	0.002	0.003	0.002	0.002	0.001	0.000	0.001	0.000	0.027	0.000	0.018	300.357	0.572	0.000000	1.250382	0.4388582E-02	-0.5452814
06152011	21	0.003	0.003	0.002	0.002	0.001	0.000	0.001	0.001	0.030	0.000	0.020	299.670	0.588	0.000000	1.482723	0.3980476E-02	-0.4288749
06152011	22	0.003	0.003	0.002	0.003	0.001	0.000	0.001	0.001	0.032	0.000	0.021	299.883	0.530	0.000000	1.301711	0.4209380E-02	-0.5097035
06152011	23	0.003	0.002	0.002	0.003	0.001	0.000	0.001	0.001	0.030	0.000	0.020	299.016	0.578	0.000000	1.437133	0.3945743E-02	-0.4386319
06152011	24	0.001	0.001	0.002	0.002	0.001	0.000	0.001	0.001	0.024	0.000	0.022	297.648	0.670	0.000000	2.009238	0.2731064E-02	-0.1333006
06162011	01	0.000	0.001	0.002	0.001	0.001	0.000	0.001	0.000	0.020	0.000	0.025	297.036	0.704	0.000000	3.088687	0.5080305E-02	-0.2161160
06162011	02	0.000	0.002	0.003	0.001	0.001	0.000	0.001	0.001	0.023	0.000	0.030	296.781	0.703	0.000000	3.623045	0.6356186E-02	-0.2441228
06162011	03	0.000	0.008	0.006	0.002	0.001	0.000	0.001	0.001	0.030	0.000	0.033	296.380	0.724	0.000000	3.915880	0.4583840E-02	-0.6840000E-01
06162011	04	0.001	0.015	0.007	0.002	0.003	0.000	0.001	0.001	0.036	0.000	0.036	296.261	0.722	0.000000	4.206153	0.4773478E-02	-0.5494983E-01
06162011	05	0.000	0.013	0.007	0.003	0.002	0.000	0.001	0.001	0.028	0.001	0.032	296.050	0.722	0.000000	3.810713	0.4563590E-02	-0.7830029E-01
06162011	06	0.000	0.009	0.007	0.002	0.002	0.000	0.001	0.001	0.022	0.001	0.032	295.829	0.725	0.000000	4.502028	0.8931268E-02	-0.2975049
06162011	07	0.000	0.009	0.007	0.002	0.002	0.000	0.001	0.002	0.022	0.001	0.028	295.984	0.764	0.000000	3.888809	0.5155887E-02	-0.1224868
06162011	08	0.001	0.011	0.008	0.002	0.002	0.000	0.001	0.002	0.024	0.001	0.026	298.090	0.706	0.000000	2.772993	0.2947022E-02	-0.2643456E-01
06162011	09	0.000	0.014	0.011	0.001	0.002	0.000	0.001	0.002	0.018	0.001	0.020	299.344	0.661	0.000000	1.729637	0.1777517E-02	-0.1185883E-01
06162011	10	0.000	0.008	0.009	0.001	0.001	0.000	0.001	0.001	0.014	0.001	0.016	300.731	0.633	0.000000	1.293322	0.1154717E-02	0.4923128E-01
06162011	11	0.001	0.007	0.009	0.001	0.001	0.000	0.001	0.001	0.014	0.001	0.015	303.051	0.585	0.000000	1.015321	0.1152936E-02	-0.5520185E-01
06162011	12	0.000	0.010	0.012	0.000	0.001	0.000	0.000	0.001	0.011	0.000	0.016	305.156	0.519	0.4768372E-06	1.097578	0.3291289E-02	-0.4769307
06162011	13	0.000	0.008	0.011	0.000	0.000	0.000	0.000	0.000	0.009	0.000	0.018	306.854	0.485	0.4172325E-06	1.604649	0.9313953E-02	-0.7637541
06162011	14	0.000	0.004	0.008	0.000	0.000	0.000	0.000	0.000	0.009	0.000	0.014	305.871	0.497	0.2384186E-06	1.125554	0.5194887E-02	-0.6642097
06162011	15	0.001	0.001	0.005	0.000	0.000	0.000	0.000	0.000	0.011	0.000	0.009	305.145	0.531	0.1144409E-04	0.5023332	0.3214499E-03	0.1938785
06162011	16	0.002	0.001	0.003	0.000	0.000	0.000	0.000	0.000	0.009	0.000	0.005	305.085	0.504	0.1567602E-04	0.3217503	0.1317874E-02	-0.6123549
06162011	17	0.002	0.000	0.002	0.000	0.000	0.000	0.000	0.000	0.007	0.000	0.004	304.527	0.475	0.1132488E-04	0.2430134	0.1148134E-02	-0.6743622
06162011	18	0.006	0.000	0.002	0.000	0.000	0.000	0.000	0.000	0.006	0.000	0.003	303.280	0.463	0.3427267E-04	0.1718213	0.2976567E-03	-0.2386386
06162011	19	0.013	0.000	0.001	0.000	0.000	0.000	0.000	0.000	0.005	0.000	0.003	302.127	0.518	0.1257062E-03	0.2044990	0.1328218E-03	0.1874217
06162011	20	0.019	0.001	0.002	0.000	0.000	0.000	0.000	0.000	0.005	0.000	0.003	300.886	0.563	0.3100634E-03	0.2291826	0.7776180E-04	0.4694153
06162011	21	0.016	0.000	0.002	0.000	0.000	0.000	0.001	0.000	0.004	0.000	0.003	299.697	0.617	NaN	0.3268853	0.3798411E-04	0.9347934
06162011	22	0.009	0.000	0.002	0.000	0.000	0.000	0.000	0.000	0.003	0.000	0.002	299.230	0.635	0.1880527E-03	0.1928640	0.9558936E-04	0.3048417
06162011	23	0.006	0.000	0.001	0.000	0.000	0.000	0.000	0.000	0.002	0.000	0.001	298.761	0.679	0.1080036E-03	0.1092896	0.5651906E-04	0.2863839
06162011	24	0.004	0.000	0.001	0.000	0.000	0.000	0.000	0.000	0.003	0.000	0.001	298.039	0.761	0.1331568E-03	0.1447178	0.6046987E-04	0.3789829
06172011	01	0.002	0.001	0.001	0.000	0.000	0.000	0.000	0.000	0.003	0.000	0.002	297.288	0.858	0.2005696E-03	0.4773270	0.2962009E-03	0.2072295
06172011	02	0.001	0.001	0.001	0.000	0.000	0.000	0.000	0.000	0.005	0.000	0.004	296.824	0.919	0.1673520E-02	1.562500	0.4806345E-03	0.5120052
06172011	03	0.001	0.000	0.001	0.000	0.000	0.000	0.000	0.000	0.006	0.000	0.003	296.623	0.921	0.9035468E-03	1.224490	0.3010631E-03	0.6092977
06172011	04	0.002	0.000	0.001	0.000	0.000	0.000	0.000	0.000	0.005	0.000	0.003	296.453	0.925	0.1149893E-02	1.401869	0.2844043E-03	0.6927713
06172011	05	0.004	0.000	0.001	0.000	0.001	0.000	0.000	0.000	0.004	0.000	0.003	296.456	0.906	0.1704037E-02	1.095658	0.1367691E-03	0.9036871
06172011	06	0.005	0.000	0.001	0.000	0.001	0.000	0.000	0.000	0.003	0.000	0.002	296.490	0.911	0.1874447E-02	0.7320217	0.5413613E-04	1.131037
06172011	07	0.005	0.000	0.001	0.000	0.001	0.000	0.000	0.000	0.003	0.000	0.002	297.599	0.862	0.8121133E-03	0.4892288	0.7014011E-04	0.8435456
06172011	08	0.003	0.002	0.002	0.000	0.000	0.000	0.000	0.000	0.005	0.000	0.003	299.077	0.811	0.2241135E-03	0.5395684	0.3477921E-03	0.1907268
06172011	09	0.000	0.016	0.008	0.000	0.000	0.000	0.000	0.000	0.006	0.000	0.010	300.129	0.772	0.2497435E-04	1.870778	0.4750704E-02	-0.4047357
06172011	10	0.000	0.039	0.021	0.000	0.001	0.000	0.000	0.000	0.009	0.000	0.013	301.047	0.728	0.000000	1.926434	0.4125477E-02	-0.3307201
06172011	11	0.000	0.046	0.025	0.000	0.001	0.000	0.000	0.000	0.010	0.000	0.015	301.911	0.691	0.000000	1.972072	0.4947152E-02	-0.3994325
06172011	12	0.000	0.038	0.023	0.000	0.001	0.000	0.000	0.000	0.010	0.000	0.015	302.395	0.669	0.000000	1.845404	0.4834126E-02	-0.4182265
06172011	13	0.000	0.032	0.020	0.000	0.000	0.000	0.000	0.000	0.010	0.000	0.016	302.440	0.662	0.6139278E-05	2.040774	0.6656528E-02	-0.5134528
06172011	14	0.000	0.030	0.019	0.000	0.000	0.000	0.000	0.000	0.010	0.000	0.019	302.315	0.659	0.7092953E-05	2.581314	0.9824663E-02	-0.5804768
06172011	15	0.000	0.027	0.020	0.000	0.000	0.000	0.000	0.000	0.009	0.000	0.023	302.297	0.657	0.8523464E-05	3.386246	0.1508669E-01	-0.6488754
06172011	16	0.000	0.025	0.022	0.000	0.000	0.000	0.000	0.000	0.010	0.000	0.028	302.163	0.656	0.1043081E-04	4.202936	0.1936180E-01	-0.6633929
06172011	17	0.000	0.025	0.022	0.000	0.000	0.000	0.000	0.001	0.010	0.000	0.028	301.762	0.659	0.1043081E-04	4.022756	0.1838758E-01	-0.6600008
06172011	18	0.000	0.028	0.019	0.000	0.001	0.000	0.000	0.001	0.011	0.000	0.029	301.027	0.674	0.1323223E-04	4.154950	0.1751334E-01	-0.6248031
06172011	19	0.000	0.041	0.013	0.000	0.001	0.000	0.001	0.001	0.012	0.000	0.031	299.993	0.699	0.2402067E-04	4.772195	0.1775669E-01	-0.5706437
06172011	20	0.000	0.059	0.008	0.001	0.001	0.000	0.001	0.001	0.017	0.000	0.036	298.361	0.741	0.000000	6.081520	0.1857842E-01	-0.4849965
06172011	21	0.000	0.063	0.005	0.001	0.001	0.000	0.001	0.001	0.022	0.000	0.039	297.516	0.763	0.000000	6.777586	0.1720337E-01	-0.4045385
06172011	22	0.000	0.053	0.005	0.001	0.002	0.000	0.001	0.002	0.026	0.000	0.037	296.821	0.805	0.000000	7.031851	0.1096788E-01	-0.1930530
06172011	23	0.001	0.042	0.005	0.001	0.002	0.000	0.001	0.002	0.028	0.000	0.030	296.412	0.831	0.000000	5.619040	0.5516596E-02	0.7990991E-02
06172011	24	0.001	0.033	0.004	0.001	0.003	0.001	0.001	0.002	0.029	0.000	0.024	296.744	0.805	0.000000	3.832111	0.3887797E-02	-0.6265533E-02
06182011	01	0.003	0.029	0.004	0.001	0.003	0.001	0.002	0.001	0.029	0.000	0.020	296.386	0.834	0.2724528E-03	4.240581	0.2986745E-02	0.1522272
06182011	02	0.003	0.026	0.003	0.001	0.003	0.001	0.002	0.001	0.030	0.000	0.020	296.104	0.864	0.6625420E-01	4.570969	0.7562593E-04	1.781337
06182011	03	0.003	0.023	0.002	0.001	0.002	0.001	0.002	0.001	0.029	0.000	0.019	295.836	0.891	0.8754259E-01	5.386747	0.6522101E-04	1.916939
06182011	04	0.005	0.021	0.002	0.002	0.002	0.001	0.002	0.002	0.026	0.000	0.017	296.467	0.860	0.5645573E-01	3.604414	0.5059217E-04	1.852751
06182011	05	0.004	0.027	0.005	0.002	0.003	0.001	0.003	0.002	0.023	0.001	0.016	296.422	0.876	0.3714526E-01	3.863443	0.7542826E-04	1.709440
06182011	06	0.003	0.038	0.009	0.001	0.003	0.001	0.003	0.002	0.022	0.001	0.017	296.496	0.886	0.1059771E-03	6.281898	0.3009406E-02	0.3196101
06182011	07	0.003	0.044	0.011	0.001	0.003	0.001	0.003	0.002	0.022	0.001	0.017	297.101	0.896	0.6711483E-04	6.865974	0.3122055E-02	0.3422617
06182011	08	0.003	0.056	0.018	0.001	0.004	0.000	0.003	0.002	0.023	0.001	0.019	299.218	0.826	0.000000	3.385039	0.3081630E-02	0.4078309E-01
06182011	09	0.002	0.083	0.032	0.001	0.004	0.000	0.002	0.002	0.023	0.002	0.020	301.333	0.743	0.000000	2.320140	0.3661552E-02	-0.1981510
06182011	10	0.001	0.092	0.038	0.001	0.003	0.000	0.002	0.001	0.021	0.002	0.021	303.409	0.664	0.000000	1.875914	0.2518981E-02	-0.1280120
06182011	11	0.001	0.085	0.039	0.001	0.002	0.000	0.001	0.001	0.017	0.001	0.020	305.451	0.590	0.000000	1.428732	0.1244329E-02	0.6001570E-01
06182011	12	0.000	0.067	0.031	0.001	0.002	0.000	0.001	0.001	0.014	0.001	0.018	307.212	0.526	0.000000	1.043959	0.7733462E-03	0.1303094
06182011	13	0.000	0.053	0.027	0.001	0.002	0.000	0.001	0.001	0.012	0.001	0.018	307.500	0.487	0.000000	1.041595	0.2248977E-02	-0.3342860
06182011	14	0.000	0.039	0.023	0.001	0.001	0.000	0.001	0.000	0.011	0.001	0.018	308.483	0.447	0.000000	1.172826	0.5178726E-02	-0.6449893
06182011	15	0.000	0.014	0.015	0.001	0.001	0.000	0.000	0.000	0.010	0.000	0.016	306.154	0.537	0.000000	1.384980	0.5367707E-02	-0.5883453
06182011	16	0.001	0.003	0.006	0.001	0.001	0.000	0.000	0.000	0.015	0.000	0.016	305.750	0.518	0.000000	0.9354948	0.7431459E-03	0.9996729E-01
06182011	17	0.002	0.001	0.004	0.001	0.001	0.000	0.001	0.000	0.020	0.000	0.014	305.792	0.473	0.000000	0.6970723	0.3591561E-02	-0.7120054
06182011	18	0.003	0.001	0.003	0.001	0.001	0.000	0.001	0.000	0.024	0.000	0.013	305.011	0.548	0.1180214E-01	0.9611863	0.1611195E-04	1.775660
06182011	19	0.005	0.001	0.002	0.001	0.001	0.000	0.001	0.000	0.026	0.000	0.014	304.015	0.550	0.1634824E-01	1.035425	0.1625377E-04	1.804165
06182011	20	0.008	0.002	0.003	0.001	0.001	0.000	0.001	0.000	0.028	0.000	0.015	301.995	0.562	0.1689124E-01	1.142145	0.2703372E-04	1.625815
06182011	21	0.006	0.002	0.003	0.001	0.001	0.000	0.001	0.000	0.029	0.000	0.016	300.471	0.588	0.2121079E-01	1.329289	0.3523598E-04	1.576633
06182011	22	0.003	0.002	0.003	0.002	0.001	0.000	0.001	0.000	0.031	0.000	0.017	299.223	0.703	0.3014916E-01	1.987097	0.4849231E-04	1.612546
06182011	23	0.003	0.002	0.002	0.003	0.002	0.000	0.001	0.000	0.030	0.000	0.020	298.525	0.758	0.000000	2.808858	0.3783379E-02	-0.1293501
06182011	24	0.001	0.011	0.006	0.004	0.003	0.000	0.001	0.001	0.027	0.000	0.026	300.031	0.680	0.000000	2.543799	0.3120362E-02	-0.8872231E-01
06192011	01	0.000	0.028	0.012	0.005	0.003	0.000	0.001	0.002	0.024	0.001	0.031	299.772	0.720	0.000000	3.672033	0.4460946E-02	-0.8452042E-01
06192011	02	0.001	0.032	0.013	0.005	0.004	0.001	0.002	0.003	0.023	0.001	0.030	299.354	0.766	0.000000	4.131711	0.3696664E-02	0.4831994E-01
06192011	03	0.001	0.033	0.016	0.005	0.004	0.001	0.002	0.003	0.021	0.001	0.025	299.014	0.788	0.000000	3.607506	0.3454701E-02	0.1879659E-01
06192011	04	0.002	0.028	0.015	0.004	0.004	0.001	0.002	0.003	0.021	0.002	0.022	298.570	0.799	0.000000	3.166970	0.3337767E-02	-0.2281203E-01
06192011	05	0.002	0.022	0.014	0.003	0.004	0.001	0.002	0.003	0.023	0.002	0.020	298.240	0.827	0.000000	3.432791	0.2867796E-02	0.7809912E-01
06192011	06	0.003	0.020	0.014	0.003	0.004	0.001	0.002	0.003	0.023	0.002	0.019	297.928	0.862	0.5549192E-04	4.821536	0.3124865E-02	0.1883541
06192011	07	0.003	0.020	0.016	0.002	0.004	0.001	0.002	0.002	0.023	0.002	0.018	298.465	0.876	0.5877018E-04	5.537567	0.3178890E-02	0.2410435
06192011	08	0.003	0.022	0.020	0.002	0.004	0.000	0.002	0.002	0.025	0.002	0.018	300.478	0.808	0.1412559E-01	2.916525	0.1114344E-03	1.417846
06192011	09	0.003	0.028	0.027	0.002	0.003	0.000	0.002	0.002	0.025	0.002	0.018	302.103	0.733	0.2312660E-04	2.355789	0.3726720E-02	-0.1991905
06192011	10	0.003	0.032	0.028	0.002	0.003	0.000	0.001	0.001	0.024	0.002	0.018	303.763	0.658	0.000000	1.687704	0.3970341E-02	-0.3715314
06192011	11	0.002	0.041	0.027	0.001	0.003	0.000	0.001	0.001	0.023	0.001	0.019	305.543	0.583	0.000000	1.263715	0.3781891E-02	-0.4760599
06192011	12	0.001	0.055	0.029	0.001	0.002	0.000	0.001	0.001	0.019	0.001	0.019	307.601	0.495	0.000000	0.9552224	0.1318587E-02	-0.1400045
06192011	13	0.000	0.045	0.027	0.001	0.001	0.000	0.001	0.001	0.017	0.001	0.018	308.683	0.439	0.000000	0.7196013	0.5794583E-03	0.9406976E-01
06192011	14	0.000	0.037	0.023	0.001	0.001	0.000	0.001	0.000	0.016	0.001	0.019	309.008	0.396	0.000000	0.7655668	0.1137579E-02	-0.1719986
06192011	15	0.000	0.027	0.017	0.000	0.001	0.000	0.001	0.000	0.016	0.000	0.020	308.813	0.402	0.1192093E-06	0.8729782	0.2109256E-02	-0.3831259
06192011	16	0.000	0.015	0.012	0.001	0.001	0.000	0.000	0.000	0.017	0.000	0.021	308.450	0.377	0.000000	0.9074026	0.3090767E-02	-0.5322662
06192011	17	0.000	0.009	0.008	0.001	0.001	0.000	0.001	0.001	0.021	0.000	0.021	308.859	0.361	0.000000	0.6013797	0.4516878E-03	0.1243104
06192011	18	0.001	0.007	0.006	0.001	0.001	0.000	0.001	0.001	0.024	0.000	0.020	308.128	0.392	0.000000	0.6251846	0.1512159E-02	-0.3835892
06192011	19	0.003	0.007	0.005	0.001	0.001	0.000	0.001	0.001	0.028	0.000	0.020	306.374	0.405	0.000000	0.7842745	0.4571280E-02	-0.7655696
06192011	20	0.004	0.010	0.003	0.002	0.001	0.000	0.001	0.001	0.032	0.000	0.021	303.691	0.453	0.000000	1.047267	0.4513120E-02	-0.6344195
06192011	21	0.004	0.010	0.003	0.003	0.002	0.000	0.001	0.001	0.033	0.000	0.022	303.153	0.451	0.000000	1.121271	0.4520868E-02	-0.6055114
06192011	22	0.002	0.008	0.004	0.003	0.002	0.000	0.001	0.001	0.031	0.000	0.023	302.358	0.515	0.000000	1.256712	0.5640776E-02	-0.6521031
06192011	23	0.001	0.009	0.006	0.003	0.002	0.000	0.001	0.001	0.027	0.000	0.025	300.442	0.642	0.000000	2.074067	0.2637986E-02	-0.1044497
06192011	24	0.001	0.011	0.008	0.002	0.002	0.000	0.001	0.002	0.025	0.000	0.028	299.875	0.686	0.000000	2.797789	0.2656833E-02	0.2245072E-01
06202011	01	0.001	0.014	0.007	0.003	0.002	0.000	0.001	0.002	0.025	0.001	0.028	299.368	0.746	0.000000	3.568522	0.3614276E-02	-0.5532885E-02
06202011	02	0.001	0.029	0.011	0.003	0.003	0.000	0.001	0.002	0.021	0.001	0.022	299.043	0.784	0.000000	3.076070	0.3449978E-02	-0.4982006E-01
06202011	03	0.001	0.039	0.013	0.002	0.002	0.000	0.001	0.002	0.015	0.001	0.016	298.827	0.800	0.000000	2.343887	0.2744059E-02	-0.6845670E-01
06202011	04	0.001	0.040	0.013	0.002	0.002	0.000	0.001	0.002	0.012	0.001	0.014	298.616	0.812	0.000000	2.128968	0.2419645E-02	-0.5558242E-01
06202011	05	0.002	0.036	0.012	0.002	0.003	0.000	0.001	0.002	0.011	0.001	0.012	298.370	0.828	0.000000	1.947991	0.2262853E-02	-0.6506944E-01
06202011	06	0.002	0.031	0.011	0.003	0.003	0.001	0.001	0.003	0.011	0.001	0.011	298.091	0.847	0.2717972E-04	3.187842	0.2588430E-02	0.9046040E-01
06202011	07	0.003	0.028	0.010	0.003	0.004	0.001	0.001	0.003	0.010	0.001	0.011	298.641	0.848	0.1260686E-01	1.858391	0.4732979E-04	1.594003
06202011	08	0.004	0.037	0.014	0.003	0.004	0.001	0.001	0.003	0.008	0.002	0.010	300.580	0.766	0.6186008E-02	1.161766	0.3302278E-04	1.546305
06202011	09	0.003	0.068	0.026	0.002	0.003	0.000	0.001	0.002	0.009	0.001	0.009	302.248	0.700	0.3663838E-02	0.8555247	0.4105634E-04	1.318852
06202011	10	0.001	0.078	0.034	0.001	0.002	0.000	0.001	0.001	0.009	0.001	0.009	303.916	0.632	0.000000	0.6716771	0.2100395E-02	-0.4951405
06202011	11	0.000	0.052	0.029	0.001	0.001	0.000	0.000	0.001	0.008	0.001	0.010	304.367	0.598	0.000000	0.7004978	0.8236961E-03	-0.7036021E-01
06202011	12	0.000	0.037	0.025	0.001	0.001	0.000	0.000	0.001	0.008	0.001	0.012	305.976	0.531	0.000000	0.8162857	0.2266307E-02	-0.4434766
06202011	13	0.000	0.024	0.021	0.000	0.001	0.000	0.000	0.001	0.008	0.001	0.013	307.633	0.478	0.1788139E-06	0.8243850	0.3190520E-02	-0.5877314
06202011	14	0.000	0.014	0.017	0.000	0.001	0.000	0.000	0.000	0.008	0.000	0.015	307.743	0.483	0.000000	1.198450	0.6261353E-02	-0.7180483
06202011	15	0.000	0.006	0.012	0.000	0.000	0.000	0.000	0.000	0.008	0.000	0.013	305.986	0.510	0.2980232E-06	1.101375	0.5203062E-02	-0.6743237
06202011	16	0.000	0.002	0.007	0.000	0.000	0.000	0.000	0.000	0.010	0.000	0.011	306.245	0.476	0.1788139E-06	0.6180282	0.1085648E-02	-0.2446806
06202011	17	0.001	0.001	0.004	0.000	0.000	0.000	0.000	0.000	0.012	0.000	0.009	305.260	0.490	0.9834766E-05	0.4243638	0.5000068E-03	-0.7123761E-01
06202011	18	0.003	0.001	0.002	0.000	0.000	0.000	0.001	0.000	0.014	0.000	0.008	303.805	0.675	NaN	0.8587042	0.9991939E-03	-0.6580615E-01
06202011	19	0.003	0.000	0.001	0.001	0.000	0.000	0.001	0.000	0.012	0.000	0.007	302.350	0.614	0.1366407E-01	0.5975645	0.7110588E-05	1.924479
06202011	20	0.001	0.000	0.001	0.001	0.000	0.000	0.001	0.000	0.010	0.000	0.006	300.053	0.669	0.9477139E-05	0.6186138	0.1894589E-02	-0.4860955
06202011	21	0.001	0.000	0.001	0.001	0.001	0.000	0.000	0.000	0.008	0.000	0.005	299.011	0.701	0.1249909E-03	0.6010754	0.1055244E-02	-0.2444240
06202011	22	0.001	0.000	0.001	0.001	0.001	0.000	0.000	0.000	0.005	0.000	0.005	298.357	0.749	0.000000	0.6690566	0.1395415E-02	-0.3192406
06202011	23	0.001	0.001	0.001	0.001	0.001	0.000	0.000	0.000	0.006	0.000	0.006	297.759	0.797	0.000000	1.011638	0.1537786E-02	-0.1818707
06202011	24	0.001	0.002	0.001	0.002	0.001	0.000	0.000	0.000	0.009	0.000	0.008	297.290	0.832	0.000000	1.554861	0.1971736E-02	-0.1031571
06212011	01	0.001	0.004	0.001	0.003	0.002	0.000	0.001	0.001	0.011	0.000	0.010	296.957	0.842	0.000000	1.834484	0.2069839E-02	-0.5242264E-01
06212011	02	0.002	0.009	0.002	0.002	0.003	0.000	0.001	0.001	0.010	0.000	0.009	296.930	0.833	0.000000	1.625401	0.1743810E-02	-0.3053866E-01
06212011	03	0.003	0.009	0.002	0.002	0.003	0.000	0.001	0.001	0.008	0.000	0.007	296.956	0.838	0.2082151E-01	1.295187	0.2057188E-04	1.799058
06212011	04	0.003	0.009	0.001	0.002	0.003	0.000	0.001	0.001	0.007	0.000	0.007	297.032	0.843	0.2595669E-01	1.295187	0.1568521E-04	1.916842
06212011	05	0.004	0.009	0.001	0.002	0.003	0.000	0.001	0.001	0.005	0.000	0.006	297.075	0.861	0.2312106E-01	1.217450	0.1346818E-04	1.956142
06212011	06	0.004	0.010	0.001	0.002	0.003	0.000	0.001	0.001	0.005	0.000	0.006	297.126	0.885	0.2651966E-01	1.511009	0.1464775E-04	2.013496
06212011	07	0.005	0.013	0.001	0.001	0.003	0.000	0.001	0.001	0.004	0.000	0.006	297.958	0.895	0.3071606E-01	1.648457	0.1260623E-04	2.116492
06212011	08	0.005	0.019	0.002	0.002	0.002	0.000	0.001	0.001	0.004	0.000	0.006	299.652	0.849	0.1555562E-01	1.132776	0.1314698E-04	1.935318
06212011	09	0.002	0.037	0.005	0.001	0.002	0.000	0.001	0.001	0.006	0.000	0.006	301.169	0.786	0.8142829E-02	0.8406903	0.1473288E-04	1.756348
06212011	10	0.001	0.043	0.008	0.001	0.001	0.000	0.001	0.001	0.005	0.000	0.006	302.444	0.730	0.000000	0.5951527	0.1437895E-02	-0.3830989
06212011	11	0.000	0.026	0.007	0.001	0.001	0.000	0.000	0.000	0.004	0.000	0.007	302.200	0.718	0.000000	1.041399	0.2604990E-02	-0.3981891
06212011	12	0.000	0.006	0.004	0.000	0.000	0.000	0.000	0.000	0.004	0.000	0.008	302.352	0.709	0.6020069E-05	1.280864	0.4421475E-02	-0.5380640
06212011	13	0.000	0.002	0.003	0.000	0.000	0.000	0.000	0.000	0.005	0.000	0.007	303.147	0.680	0.3695488E-05	0.8949569	0.2305063E-02	-0.4108807
06212011	14	0.000	0.001	0.002	0.000	0.000	0.000	0.000	0.000	0.006	0.000	0.007	303.033	0.679	0.5066395E-05	0.8097973	0.1350024E-02	-0.2219653
06212011	15	0.000	0.001	0.002	0.000	0.000	0.000	0.000	0.000	0.005	0.000	0.007	302.332	0.696	0.5543232E-05	0.9567358	0.2356010E-02	-0.3913850
06212011	16	0.000	0.002	0.002	0.000	0.000	0.000	0.000	0.000	0.004	0.000	0.007	301.640	0.711	0.6020069E-05	1.077199	0.3379125E-02	-0.4965085
06212011	17	0.000	0.003	0.002	0.000	0.000	0.000	0.000	0.000	0.003	0.000	0.008	301.030	0.723	0.7569790E-05	1.410103	0.5475818E-02	-0.5891982
06212011	18	0.000	0.005	0.002	0.000	0.000	0.000	0.000	0.000	0.004	0.000	0.010	300.423	0.733	0.1144409E-04	1.796011	0.6626934E-02	-0.5670035
06212011	19	0.000	0.009	0.002	0.000	0.000	0.000	0.000	0.000	0.006	0.000	0.012	299.672	0.744	0.1811981E-04	2.118990	0.6802457E-02	-0.5065368
06212011	20	0.000	0.011	0.002	0.000	0.000	0.000	0.000	0.000	0.011	0.000	0.014	298.564	0.782	0.6490946E-04	2.482284	0.4442448E-02	-0.2527709
06212011	21	0.001	0.011	0.001	0.000	0.000	0.000	0.001	0.000	0.018	0.000	0.016	297.974	0.806	0.4667640E-03	2.800778	0.2958603E-02	-0.2380798E-01
06212011	22	0.001	0.011	0.002	0.000	0.000	0.000	0.001	0.000	0.022	0.000	0.016	297.528	0.824	0.1076102E-02	2.820611	0.3233003E-02	-0.5926287E-01
06212011	23	0.002	0.011	0.001	0.000	0.001	0.000	0.001	0.000	0.023	0.000	0.016	296.959	0.852	0.3546834E-02	3.453363	0.3184131E-02	0.3525128E-01
06212011	24	0.002	0.008	0.001	0.000	0.001	0.000	0.001	0.000	0.020	0.000	0.015	296.313	0.888	0.4682839E-02	4.323723	0.3046914E-02	0.1519976
06222011	01	0.001	0.008	0.001	0.000	0.001	0.000	0.001	0.000	0.019	0.000	0.014	295.870	0.913	0.6141663E-02	4.888103	0.2912544E-02	0.2248679
06222011	02	0.001	0.009	0.001	0.000	0.002	0.000	0.001	0.000	0.017	0.000	0.014	295.424	0.935	0.1131815E-01	7.422974	0.3024239E-02	0.3899617
06222011	03	0.001	0.011	0.002	0.000	0.002	0.000	0.001	0.000	0.016	0.000	0.013	295.433	0.937	0.1162839E-01	6.876525	0.2810458E-02	0.3885919
06222011	04	0.001	0.013	0.002	0.000	0.003	0.000	0.001	0.000	0.015	0.000	0.014	295.424	0.938	0.9224832E-02	7.483370	0.3120248E-02	0.3799081
06222011	05	0.001	0.016	0.003	0.000	0.003	0.000	0.001	0.000	0.014	0.000	0.018	295.360	0.938	0.4870176E-02	9.900115	0.5562088E-02	0.2504024
06222011	06	0.000	0.013	0.004	0.000	0.003	0.000	0.001	0.001	0.014	0.000	0.020	295.269	0.937	0.4142761E-02	10.65153	0.6789845E-02	0.1955521
06222011	07	0.000	0.011	0.004	0.000	0.003	0.000	0.001	0.001	0.013	0.000	0.022	295.294	0.933	0.2603471E-02	10.53323	0.8922474E-02	0.7207628E-01
06222011	08	0.000	0.011	0.006	0.001	0.002	0.000	0.001	0.001	0.013	0.000	0.024	295.790	0.917	0.000000	10.45450	0.1128467E-01	-0.3318546E-01
06222011	09	0.000	0.015	0.010	0.001	0.002	0.000	0.001	0.001	0.012	0.000	0.027	297.679	0.875	0.000000	8.621285	0.1433791E-01	-0.2209139
06222011	10	0.000	0.027	0.014	0.000	0.001	0.000	0.000	0.001	0.008	0.000	0.024	299.958	0.805	0.8952618E-04	5.564914	0.1592685E-01	-0.4566715
06222011	11	0.000	0.018	0.011	0.000	0.001	0.000	0.000	0.000	0.004	0.000	0.013	299.386	0.812	0.000000	3.163678	0.9147958E-02	-0.4611319
06222011	12	0.000	0.006	0.006	0.000	0.000	0.000	0.000	0.000	0.004	0.000	0.011	300.792	0.801	0.3314018E-04	2.571120	0.7804587E-02	-0.4822276
06222011	13	0.000	0.002	0.004	0.000	0.000	0.000	0.000	0.000	0.003	0.000	0.009	301.573	0.782	0.1823902E-04	1.972441	0.6600996E-02	-0.5246055
06222011	14	0.000	0.001	0.003	0.000	0.000	0.000	0.000	0.000	0.002	0.000	0.008	301.705	0.782	0.1531839E-04	1.814961	0.6525571E-02	-0.5557513
06222011	15	0.000	0.000	0.002	0.000	0.000	0.000	0.000	0.000	0.002	0.000	0.006	301.087	0.800	0.1728535E-04	1.419608	0.4429208E-02	-0.4941575
06222011	16	0.000	0.000	0.002	0.000	0.000	0.000	0.000	0.000	0.002	0.000	0.005	300.235	0.820	0.2235174E-04	1.254181	0.3400273E-02	-0.4331537
06222011	17	0.000	0.000	0.002	0.000	0.000	0.000	0.000	0.000	0.002	0.000	0.004	299.227	0.850	0.3606081E-04	1.119918	0.2388453E-02	-0.3289305
06222011	18	0.000	0.000	0.002	0.000	0.000	0.000	0.000	0.000	0.003	0.000	0.004	298.659	0.882	0.1038313E-03	1.238083	0.1602880E-02	-0.1121513
06222011	19	0.001	0.000	0.002	0.000	0.000	0.000	0.000	0.000	0.006	0.000	0.005	298.070	0.899	0.9165406E-03	1.584448	0.6749646E-03	0.3705970
06222011	20	0.002	0.001	0.002	0.000	0.001	0.000	0.000	0.000	0.009	0.000	0.006	297.343	0.916	0.5239248E-04	2.452367	0.1746690E-02	0.1473697
06222011	21	0.003	0.002	0.002	0.000	0.001	0.000	0.000	0.000	0.010	0.000	0.006	297.005	0.925	0.3567159E-02	2.804835	0.3196673E-03	0.9432091
06222011	22	0.004	0.003	0.002	0.000	0.001	0.000	0.001	0.000	0.010	0.000	0.007	296.866	0.935	NaN	3.882134	0.5962132E-03	0.8136690
06222011	23	0.004	0.003	0.002	0.000	0.002	0.000	0.001	0.000	0.010	0.000	0.007	296.949	0.926	NaN	3.497547	0.4360163E-03	0.9042608
06222011	24	0.003	0.003	0.002	0.000	0.002	0.000	0.001	0.000	0.011	0.000	0.007	296.972	0.936	NaN	4.087086	0.4240490E-03	0.9839977
06232011	01	0.001	0.003	0.001	0.000	0.001	0.000	0.001	0.000	0.012	0.000	0.008	296.847	0.964	0.5412889E-01	6.651419	0.2034036E-02	0.5145557
06232011	02	0.001	0.002	0.001	0.000	0.001	0.000	0.001	0.000	0.012	0.000	0.007	296.915	0.967	NaN	8.052660	0.2667528E-03	1.479830
06232011	03	0.002	0.001	0.001	0.000	0.001	0.000	0.001	0.000	0.012	0.000	0.007	297.002	0.962	NaN	5.878851	0.2631923E-03	1.349019
06232011	04	0.003	0.001	0.001	0.000	0.001	0.000	0.000	0.000	0.012	0.000	0.007	297.050	0.965	0.1732194E-01	8.052660	0.3312195E-03	1.385823
06232011	05	0.003	0.001	0.001	0.000	0.001	0.000	0.000	0.000	0.013	0.000	0.008	297.085	0.968	0.1638049E-01	9.202085	0.4639218E-03	1.297441
06232011	06	0.003	0.003	0.001	0.000	0.002	0.000	0.001	0.000	0.014	0.000	0.008	297.178	0.968	NaN	9.208768	0.2611501E-03	1.547311
06232011	07	0.003	0.006	0.001	0.000	0.003	0.000	0.001	0.000	0.015	0.000	0.009	298.169	0.928	NaN	4.200478	0.2833746E-03	1.170938
06232011	08	0.001	0.020	0.005	0.000	0.002	0.000	0.000	0.000	0.011	0.000	0.009	299.124	0.882	0.000000	2.389226	0.2303883E-02	0.1579689E-01
06232011	09	0.000	0.014	0.006	0.000	0.001	0.000	0.000	0.000	0.004	0.000	0.007	299.477	0.859	0.000000	1.946598	0.3151935E-02	-0.2093009
06232011	10	0.000	0.002	0.005	0.000	0.000	0.000	0.000	0.000	0.004	0.000	0.008	300.365	0.835	0.5459785E-04	2.123899	0.4716206E-02	-0.3464589
06232011	11	0.000	0.000	0.004	0.000	0.000	0.000	0.000	0.000	0.004	0.000	0.009	301.013	0.800	0.2837181E-04	2.034927	0.5669969E-02	-0.4450319
06232011	12	0.000	0.000	0.003	0.000	0.000	0.000	0.000	0.000	0.005	0.000	0.009	301.976	0.754	0.1341105E-04	1.599867	0.4561881E-02	-0.4550601
06232011	13	0.000	0.000	0.003	0.000	0.000	0.000	0.000	0.000	0.005	0.000	0.008	302.370	0.718	0.7748604E-05	1.234411	0.3438354E-02	-0.4448906
06232011	14	0.000	0.000	0.003	0.000	0.000	0.000	0.000	0.000	0.006	0.000	0.007	302.442	0.705	0.8702278E-05	0.9029667	0.1442795E-02	-0.2035330
06232011	15	0.001	0.000	0.003	0.000	0.000	0.000	0.000	0.000	0.007	0.000	0.007	302.394	0.693	0.2592802E-04	0.7339079	0.4704104E-03	0.1931646
06232011	16	0.001	0.000	0.004	0.000	0.000	0.000	0.000	0.000	0.008	0.000	0.008	302.349	0.683	0.2461672E-04	0.8094420	0.5093262E-03	0.2011897
06232011	17	0.001	0.001	0.004	0.000	0.000	0.000	0.000	0.000	0.010	0.000	0.009	301.748	0.701	0.5131960E-04	0.9672423	0.6918359E-03	0.1455322
06232011	18	0.001	0.002	0.004	0.001	0.000	0.000	0.000	0.000	0.013	0.000	0.012	301.195	0.715	0.000000	1.412375	0.1763660E-02	-0.9646500E-01
06232011	19	0.002	0.002	0.002	0.001	0.000	0.000	0.001	0.001	0.021	0.000	0.014	301.145	0.755	0.000000	1.816235	0.3180818E-02	-0.2433668
06232011	20	0.003	0.004	0.002	0.001	0.001	0.000	0.001	0.001	0.028	0.000	0.016	299.211	0.773	0.3959775E-01	2.264610	0.3620477E-04	1.796228
06232011	21	0.005	0.005	0.002	0.002	0.001	0.000	0.001	0.001	0.033	0.000	0.018	298.322	0.760	0.4380596E-01	2.465811	0.4825288E-04	1.708436
06232011	22	0.005	0.007	0.002	0.002	0.001	0.000	0.001	0.001	0.035	0.000	0.019	297.626	0.779	0.5001378E-01	2.831207	0.5392273E-04	1.720200
06232011	23	0.005	0.007	0.002	0.002	0.001	0.000	0.001	0.001	0.035	0.000	0.020	296.934	0.817	0.6187117E-01	3.595429	0.6436187E-04	1.747122
06232011	24	0.004	0.006	0.002	0.002	0.002	0.000	0.001	0.001	0.033	0.000	0.019	296.341	0.869	0.7314688E-01	4.613736	0.6998904E-04	1.819023
06242011	01	0.004	0.004	0.001	0.002	0.003	0.000	0.001	0.001	0.032	0.000	0.019	295.864	0.905	0.1136473	6.549116	0.6574851E-04	1.998297
06242011	02	0.004	0.003	0.001	0.001	0.003	0.000	0.001	0.001	0.029	0.000	0.018	295.544	0.933	0.1453326	7.938796	0.6117902E-04	2.113152
06242011	03	0.004	0.003	0.001	0.001	0.004	0.000	0.001	0.001	0.026	0.000	0.017	295.386	0.946	0.1727344	10.58298	0.7062130E-04	2.175673
06242011	04	0.004	0.003	0.001	0.001	0.005	0.000	0.001	0.002	0.024	0.000	0.017	295.250	0.953	0.1635662	9.918555	0.6733911E-04	2.168181
06242011	05	0.004	0.003	0.001	0.001	0.006	0.000	0.001	0.002	0.023	0.000	0.017	295.117	0.955	0.1924545	12.60154	0.8033618E-04	2.195513
06242011	06	0.006	0.004	0.001	0.001	0.006	0.000	0.001	0.002	0.021	0.000	0.017	294.973	0.954	0.1653010	9.916376	0.6895583E-04	2.157782
06242011	07	0.008	0.005	0.002	0.001	0.006	0.000	0.001	0.002	0.020	0.000	0.017	295.799	0.954	0.1270438	9.916376	0.8428856E-04	2.070584
06242011	08	0.006	0.013	0.007	0.002	0.006	0.000	0.001	0.003	0.022	0.001	0.017	297.991	0.872	0.2944583E-01	3.634765	0.8710344E-04	1.620441
06242011	09	0.002	0.024	0.014	0.001	0.004	0.000	0.001	0.002	0.021	0.001	0.018	299.695	0.809	0.000000	2.826283	0.3286701E-02	-0.6554449E-01
06242011	10	0.001	0.031	0.019	0.000	0.002	0.000	0.001	0.001	0.016	0.000	0.020	301.456	0.734	0.7909536E-04	2.426974	0.2539464E-02	-0.1967703E-01
06242011	11	0.000	0.030	0.019	0.000	0.001	0.000	0.001	0.001	0.015	0.000	0.020	303.256	0.664	0.1126528E-04	2.016584	0.3147439E-02	-0.1933409
06242011	12	0.000	0.028	0.018	0.000	0.001	0.000	0.001	0.001	0.015	0.000	0.019	304.926	0.583	0.3039837E-05	1.381567	0.1739128E-02	-0.9995963E-01
06242011	13	0.000	0.026	0.017	0.000	0.001	0.000	0.001	0.001	0.016	0.000	0.018	306.402	0.541	0.6258488E-05	1.055188	0.8179250E-03	0.1106164
06242011	14	0.000	0.013	0.012	0.000	0.001	0.000	0.001	0.001	0.015	0.000	0.019	304.422	0.609	0.5304813E-05	1.534029	0.1934623E-02	-0.1007627
06242011	15	0.000	0.004	0.007	0.001	0.000	0.000	0.001	0.001	0.015	0.000	0.017	303.428	0.625	0.000000	1.382975	0.1375534E-02	0.2343009E-02
06242011	16	0.001	0.003	0.005	0.001	0.000	0.000	0.001	0.001	0.016	0.000	0.016	302.851	0.635	0.000000	1.278853	0.1422210E-02	-0.4614305E-01
06242011	17	0.001	0.002	0.004	0.001	0.000	0.000	0.001	0.001	0.018	0.000	0.016	302.587	0.653	0.000000	1.295321	0.1945353E-02	-0.1766210
06242011	18	0.002	0.002	0.003	0.002	0.000	0.000	0.001	0.001	0.022	0.000	0.017	301.598	0.672	0.000000	1.463449	0.3350164E-02	-0.3596884
06242011	19	0.003	0.002	0.004	0.002	0.001	0.000	0.001	0.001	0.028	0.000	0.019	300.484	0.653	0.000000	1.696515	0.3850249E-02	-0.3559311
06242011	20	0.004	0.003	0.004	0.002	0.001	0.000	0.001	0.001	0.030	0.000	0.019	298.465	0.696	0.1355410E-03	2.103782	0.3150188E-02	-0.1753357
06242011	21	0.006	0.003	0.003	0.003	0.001	0.000	0.001	0.002	0.029	0.000	0.018	297.871	0.640	0.2602285E-01	1.542573	0.5103241E-04	1.480400
06242011	22	0.010	0.003	0.003	0.003	0.001	0.000	0.002	0.002	0.026	0.000	0.017	297.199	0.675	0.2682078E-01	1.625938	0.4871954E-04	1.523401
06242011	23	0.013	0.004	0.004	0.003	0.001	0.000	0.002	0.002	0.024	0.000	0.016	296.854	0.700	0.2398205E-01	1.622826	0.5538420E-04	1.466886
06242011	24	0.015	0.005	0.006	0.003	0.001	0.001	0.002	0.002	0.023	0.001	0.016	296.369	0.746	0.2172643E-01	2.000150	0.6935352E-04	1.459994
06252011	01	0.018	0.008	0.008	0.002	0.001	0.001	0.002	0.003	0.021	0.001	0.016	295.794	0.815	0.2327472E-01	2.490629	0.8058851E-04	1.490036
06252011	02	0.020	0.015	0.009	0.002	0.002	0.001	0.003	0.004	0.017	0.001	0.016	295.355	0.865	0.3283042E-01	3.098724	0.6534962E-04	1.675940
06252011	03	0.021	0.023	0.010	0.001	0.002	0.001	0.003	0.006	0.014	0.001	0.016	295.109	0.884	0.3761965E-01	2.806877	0.4252001E-04	1.819630
06252011	04	0.023	0.028	0.010	0.001	0.002	0.001	0.003	0.007	0.013	0.002	0.016	294.945	0.894	0.4697096E-01	2.783847	0.3039719E-04	1.961812
06252011	05	0.025	0.030	0.010	0.001	0.002	0.001	0.004	0.007	0.013	0.002	0.016	294.811	0.903	0.6523138E-01	3.091247	0.2340128E-04	2.120894
06252011	06	0.024	0.025	0.008	0.002	0.002	0.001	0.003	0.006	0.015	0.002	0.016	294.748	0.914	0.6979871E-01	3.771787	0.3370896E-04	2.048802
06252011	07	0.022	0.016	0.007	0.001	0.002	0.001	0.003	0.005	0.017	0.001	0.016	295.775	0.914	0.5456811E-01	4.037588	0.4546097E-04	1.948483
06252011	08	0.012	0.011	0.010	0.001	0.002	0.001	0.002	0.004	0.019	0.001	0.016	297.705	0.857	0.2099419E-01	2.888423	0.7133258E-04	1.607373
06252011	09	0.008	0.023	0.023	0.000	0.002	0.001	0.002	0.003	0.017	0.001	0.014	299.520	0.784	NaN	2.561616	0.1134888E-01	-0.6464390
06252011	10	0.008	0.025	0.025	0.000	0.002	0.000	0.001	0.002	0.016	0.001	0.012	301.422	0.707	NaN	1.638200	0.1685164E-01	-1.012275
06252011	11	0.007	0.026	0.023	0.000	0.001	0.000	0.001	0.002	0.016	0.001	0.011	303.178	0.638	NaN	1.161297	0.1528185E-01	-1.119233
06252011	12	0.006	0.031	0.023	0.000	0.001	0.000	0.001	0.002	0.019	0.000	0.012	304.700	0.579	NaN	1.027894	0.1416288E-01	-1.139203
06252011	13	0.005	0.031	0.023	0.000	0.001	0.000	0.001	0.002	0.021	0.000	0.013	306.310	0.528	NaN	0.9168743	0.1511232E-01	-1.217021
06252011	14	0.002	0.011	0.022	0.000	0.001	0.000	0.001	0.002	0.022	0.000	0.018	305.438	0.549	0.7206202E-04	0.9898990	0.3501902E-02	-0.5487131
06252011	15	0.002	0.001	0.014	0.000	0.000	0.000	0.001	0.002	0.019	0.001	0.016	304.821	0.575	0.5912781E-04	0.8853887	0.2857265E-02	-0.5088165
06252011	16	0.002	0.000	0.009	0.000	0.000	0.000	0.001	0.002	0.015	0.001	0.012	304.017	0.589	0.2307296E-03	0.7472188	0.2922995E-02	-0.5923802
06252011	17	0.004	0.001	0.010	0.000	0.000	0.000	0.001	0.002	0.015	0.001	0.011	303.788	0.591	0.7569551E-02	1.061249	0.3580167E-02	-0.5280859
06252011	18	0.007	0.002	0.011	0.000	0.001	0.000	0.001	0.002	0.016	0.001	0.012	303.275	0.600	NaN	1.015158	0.5513194E-02	-0.7348699
06252011	19	0.010	0.003	0.010	0.001	0.001	0.000	0.001	0.003	0.016	0.001	0.013	302.268	0.645	0.7254064E-02	0.9943522	0.3487703E-04	1.455001
06252011	20	0.014	0.004	0.007	0.001	0.001	0.001	0.002	0.004	0.015	0.001	0.013	300.586	0.688	0.9068191E-02	1.067935	0.2397299E-04	1.648823
06252011	21	0.019	0.005	0.006	0.001	0.002	0.001	0.002	0.005	0.014	0.001	0.014	299.453	0.709	0.1086199E-01	1.155975	0.2667678E-04	1.636815
06252011	22	0.021	0.008	0.007	0.002	0.002	0.001	0.003	0.005	0.014	0.001	0.015	298.653	0.743	0.1269490E-01	1.398704	0.3631631E-04	1.585624
06252011	23	0.019	0.011	0.008	0.002	0.002	0.001	0.003	0.005	0.014	0.001	0.016	298.101	0.781	0.1485354E-01	1.777509	0.4626746E-04	1.584536
06252011	24	0.012	0.010	0.007	0.002	0.002	0.001	0.003	0.005	0.016	0.001	0.016	297.678	0.844	0.1972735E-01	2.346762	0.5045848E-04	1.667535
06262011	01	0.007	0.005	0.004	0.002	0.002	0.001	0.003	0.003	0.018	0.001	0.015	297.305	0.893	0.3457332E-01	3.578761	0.5417878E-04	1.819903
06262011	02	0.004	0.002	0.002	0.001	0.002	0.000	0.002	0.002	0.018	0.000	0.014	297.067	0.921	0.6882614E-01	4.885675	0.4496767E-04	2.036024
06262011	03	0.003	0.001	0.001	0.001	0.002	0.000	0.001	0.001	0.018	0.000	0.013	296.989	0.923	0.000000	4.895205	0.2424430E-02	0.3051612
06262011	04	0.002	0.001	0.001	0.001	0.001	0.000	0.001	0.001	0.016	0.000	0.012	296.949	0.919	0.000000	4.413501	0.2426322E-02	0.2598347
06262011	05	0.002	0.001	0.001	0.001	0.002	0.000	0.001	0.001	0.016	0.000	0.012	296.894	0.915	0.000000	4.451965	0.2324227E-02	0.2822733
06262011	06	0.002	0.003	0.001	0.001	0.002	0.000	0.001	0.001	0.017	0.000	0.012	296.897	0.905	0.000000	3.998913	0.2278547E-02	0.2442840
06262011	07	0.003	0.007	0.002	0.001	0.002	0.000	0.001	0.001	0.020	0.000	0.012	297.930	0.899	0.5281103E-01	3.608956	0.3695436E-04	1.989716
06262011	08	0.004	0.023	0.005	0.002	0.003	0.000	0.001	0.001	0.020	0.000	0.013	300.291	0.821	0.2247787E-01	2.301482	0.4382054E-04	1.720330
06262011	09	0.001	0.092	0.023	0.001	0.003	0.000	0.001	0.002	0.014	0.001	0.015	301.905	0.754	0.000000	1.733384	0.2624311E-02	-0.1801203
06262011	10	0.000	0.078	0.029	0.000	0.001	0.000	0.001	0.001	0.010	0.000	0.016	303.643	0.672	0.7688999E-05	1.773981	0.3808025E-02	-0.3317508
06262011	11	0.000	0.044	0.023	0.000	0.001	0.000	0.001	0.001	0.011	0.000	0.018	305.266	0.592	0.1907349E-05	1.598150	0.4486497E-02	-0.4482900
06262011	12	0.000	0.012	0.014	0.000	0.000	0.000	0.001	0.001	0.010	0.000	0.015	304.710	0.598	0.1966953E-05	1.327294	0.3447350E-02	-0.4145183
06262011	13	0.000	0.002	0.006	0.000	0.000	0.000	0.000	0.001	0.011	0.000	0.013	305.521	0.557	0.1132488E-05	0.8752759	0.1449279E-02	-0.2190071
06262011	14	0.001	0.001	0.004	0.000	0.000	0.000	0.000	0.001	0.012	0.000	0.011	305.729	0.556	0.1549721E-04	0.6268738	0.1189432E-02	-0.2781594
06262011	15	0.001	0.000	0.003	0.000	0.000	0.000	0.000	0.001	0.011	0.000	0.010	305.123	0.580	0.1883507E-04	0.6027338	0.1281589E-02	-0.3276233
06262011	16	0.001	0.000	0.003	0.000	0.000	0.000	0.000	0.000	0.010	0.000	0.008	304.191	0.611	0.2557039E-04	0.5933891	0.5080342E-03	0.6744662E-01
06262011	17	0.001	0.000	0.002	0.000	0.000	0.000	0.000	0.000	0.008	0.000	0.007	302.021	0.685	0.4303455E-04	0.7143173	0.5530011E-03	0.1111652
06262011	18	0.002	0.001	0.002	0.000	0.000	0.000	0.000	0.000	0.008	0.000	0.006	300.496	0.781	0.4032850E-03	0.8886845	0.5953773E-03	0.1739553
06262011	19	0.002	0.004	0.002	0.001	0.000	0.000	0.001	0.001	0.010	0.000	0.007	299.315	0.845	0.000000	1.778254	0.2238302E-02	-0.9992499E-01
06262011	20	0.002	0.011	0.002	0.001	0.001	0.000	0.001	0.001	0.013	0.000	0.011	297.994	0.860	0.000000	2.306334	0.2350480E-02	-0.8234307E-02
06262011	21	0.001	0.011	0.002	0.001	0.001	0.000	0.001	0.001	0.016	0.000	0.014	297.286	0.877	0.000000	3.456528	0.2812244E-02	0.8958711E-01
06262011	22	0.002	0.008	0.002	0.001	0.001	0.000	0.001	0.001	0.018	0.000	0.015	297.064	0.874	0.000000	3.423274	0.2918618E-02	0.6926434E-01
06262011	23	0.002	0.005	0.002	0.001	0.002	0.000	0.001	0.001	0.019	0.000	0.014	297.051	0.873	0.000000	3.282820	0.2613295E-02	0.9905854E-01
06262011	24	0.003	0.004	0.002	0.002	0.002	0.000	0.002	0.002	0.018	0.000	0.014	297.081	0.852	0.000000	3.134744	0.2556036E-02	0.8863516E-01
06272011	01	0.006	0.003	0.002	0.002	0.002	0.001	0.002	0.003	0.015	0.000	0.013	297.307	0.827	0.3147775E-01	2.035053	0.2669962E-04	1.882071
06272011	02	0.007	0.003	0.002	0.003	0.003	0.001	0.003	0.004	0.009	0.000	0.013	297.462	0.810	0.2391785E-01	1.674466	0.2215006E-04	1.878501
06272011	03	0.005	0.002	0.002	0.004	0.003	0.001	0.003	0.006	0.007	0.000	0.013	297.458	0.825	0.000000	3.831069	0.2921740E-02	0.1176784
06272011	04	0.004	0.002	0.001	0.005	0.003	0.001	0.003	0.006	0.008	0.000	0.013	297.447	0.828	0.000000	3.831069	0.2920003E-02	0.1179368
06272011	05	0.003	0.006	0.001	0.005	0.004	0.001	0.003	0.005	0.010	0.000	0.013	297.357	0.844	0.2399349E-01	1.740975	0.2019438E-04	1.935562
06272011	06	0.003	0.010	0.002	0.004	0.004	0.001	0.002	0.004	0.013	0.001	0.014	297.234	0.853	0.000000	4.084074	0.2798252E-02	0.1642068
06272011	07	0.004	0.013	0.003	0.003	0.004	0.001	0.002	0.003	0.014	0.001	0.013	297.945	0.867	0.2641207E-01	2.596074	0.3954135E-04	1.817266
06272011	08	0.003	0.023	0.007	0.003	0.003	0.001	0.002	0.002	0.014	0.001	0.013	299.979	0.803	0.2741814E-04	2.644357	0.2887362E-02	-0.3818111E-01
06272011	09	0.002	0.056	0.019	0.001	0.002	0.000	0.001	0.002	0.012	0.001	0.012	301.608	0.747	0.000000	1.331219	0.2531689E-02	-0.2791608
06272011	10	0.001	0.071	0.030	0.001	0.002	0.000	0.001	0.001	0.012	0.001	0.013	303.185	0.686	0.000000	1.271202	0.1900621E-02	-0.1746811
06272011	11	0.000	0.070	0.036	0.000	0.001	0.000	0.001	0.001	0.012	0.001	0.015	304.738	0.628	0.1186132E-04	1.249911	0.1198121E-02	0.1837814E-01
06272011	12	0.000	0.049	0.031	0.000	0.001	0.000	0.001	0.001	0.012	0.001	0.016	306.187	0.576	0.2145767E-05	1.167434	0.1622918E-02	-0.1430643
06272011	13	0.000	0.024	0.021	0.000	0.001	0.000	0.000	0.001	0.011	0.000	0.016	306.447	0.559	0.8940697E-06	1.239993	0.3406591E-02	-0.4389008
06272011	14	0.000	0.004	0.009	0.000	0.000	0.000	0.000	0.000	0.009	0.000	0.012	305.928	0.569	0.8344650E-06	1.064512	0.3222224E-02	-0.4810052
06272011	15	0.001	0.001	0.004	0.000	0.000	0.000	0.000	0.000	0.010	0.000	0.009	306.608	0.544	0.8642673E-05	0.5324157	0.1883752E-03	0.4512271
06272011	16	0.002	0.000	0.003	0.000	0.000	0.000	0.000	0.000	0.012	0.000	0.009	307.030	0.504	0.1621246E-04	0.4515718	0.6701482E-03	-0.1714440
06272011	17	0.003	0.000	0.002	0.000	0.000	0.000	0.000	0.000	0.013	0.000	0.008	305.105	0.542	0.5781651E-04	0.5772006	0.1470693E-02	-0.4061951
06272011	18	0.002	0.000	0.001	0.000	0.000	0.000	0.000	0.000	0.013	0.000	0.007	304.037	0.595	0.5674362E-04	0.5998286	0.1387358E-02	-0.3641613
06272011	19	0.005	0.000	0.001	0.000	0.000	0.000	0.000	0.000	0.012	0.000	0.006	302.750	0.606	0.1468658E-03	0.5295675	0.5444172E-03	-0.1201049E-01
06272011	20	0.006	0.000	0.001	0.001	0.000	0.000	0.001	0.000	0.010	0.000	0.006	300.909	0.702	0.1574081E-01	0.6859043	0.7742672E-05	1.947373
06272011	21	0.006	0.000	0.001	0.001	0.001	0.000	0.001	0.000	0.010	0.000	0.006	300.534	0.659	0.1471668E-01	0.6162958	0.7954241E-05	1.889190
06272011	22	0.005	0.000	0.001	0.002	0.001	0.000	0.001	0.000	0.008	0.000	0.005	299.889	0.723	0.1327842E-01	0.6288019	0.8101382E-05	1.889955
06272011	23	0.002	0.000	0.000	0.001	0.001	0.000	0.000	0.000	0.006	0.000	0.004	298.536	0.862	NaN	0.9665558	0.4522014E-03	0.3298951
06272011	24	0.001	0.000	0.000	0.001	0.000	0.000	0.000	0.000	0.004	0.000	0.004	298.268	0.885	NaN	1.183049	0.1354043E-02	-0.5862946E-01
06282011	01	0.001	0.000	0.001	0.000	0.000	0.000	0.000	0.000	0.005	0.000	0.004	298.053	0.909	0.1200259E-02	1.388889	0.4604735E-03	0.4794628
06282011	02	0.001	0.003	0.002	0.001	0.001	0.000	0.000	0.000	0.007	0.000	0.007	297.968	0.911	0.000000	2.524530	0.2025741E-02	0.9559663E-01
06282011	03	0.001	0.013	0.005	0.001	0.001	0.000	0.000	0.001	0.009	0.000	0.011	298.385	0.843	0.000000	2.148573	0.2429744E-02	-0.5341053E-01
06282011	04	0.001	0.020	0.006	0.001	0.002	0.000	0.001	0.001	0.011	0.000	0.013	297.939	0.867	0.000000	3.085293	0.2687657E-02	0.5992265E-01
06282011	05	0.001	0.018	0.005	0.001	0.002	0.000	0.001	0.001	0.012	0.000	0.013	297.693	0.892	0.000000	3.565106	0.2723816E-02	0.1168947
06282011	06	0.002	0.014	0.004	0.001	0.003	0.000	0.001	0.001	0.014	0.000	0.012	297.674	0.900	0.000000	3.554195	0.2361653E-02	0.1775252
06282011	07	0.002	0.015	0.004	0.001	0.004	0.000	0.001	0.001	0.015	0.000	0.011	298.534	0.901	0.3513485E-01	3.294516	0.4574221E-04	1.857474
06282011	08	0.002	0.033	0.010	0.001	0.004	0.000	0.001	0.001	0.014	0.000	0.010	299.666	0.865	0.1589465E-01	2.333969	0.5149960E-04	1.656291
06282011	09	0.001	0.062	0.023	0.001	0.003	0.000	0.001	0.001	0.010	0.000	0.010	300.457	0.825	0.000000	1.748787	0.2199615E-02	-0.9960961E-01
06282011	10	0.000	0.046	0.029	0.000	0.001	0.000	0.000	0.000	0.009	0.000	0.013	300.926	0.794	0.000000	2.451372	0.4539279E-02	-0.2675776
06282011	11	0.000	0.029	0.026	0.000	0.001	0.000	0.000	0.000	0.009	0.000	0.015	300.651	0.770	0.000000	2.734105	0.6370830E-02	-0.3673808
06282011	12	0.000	0.016	0.021	0.000	0.000	0.000	0.000	0.000	0.010	0.000	0.016	300.207	0.760	0.3504753E-04	2.847300	0.7164405E-02	-0.4007469
06282011	13	0.000	0.009	0.017	0.000	0.000	0.000	0.000	0.000	0.010	0.000	0.017	300.369	0.744	0.2580881E-04	2.867934	0.8112704E-02	-0.4515965
06282011	14	0.000	0.006	0.015	0.000	0.000	0.000	0.000	0.000	0.010	0.000	0.020	300.462	0.741	0.2801418E-04	3.531651	0.1128574E-01	-0.5045521
06282011	15	0.000	0.009	0.020	0.000	0.000	0.000	0.000	0.000	0.010	0.000	0.024	300.360	0.743	0.3218651E-04	4.416606	0.1554940E-01	-0.5466251
06282011	16	0.000	0.014	0.022	0.000	0.000	0.000	0.000	0.001	0.011	0.000	0.023	300.130	0.760	0.4291534E-04	4.164893	0.1265065E-01	-0.4825089
06282011	17	0.000	0.016	0.021	0.000	0.000	0.000	0.000	0.001	0.012	0.000	0.023	299.536	0.783	0.6377697E-04	4.389764	0.1185183E-01	-0.4313441
06282011	18	0.000	0.012	0.018	0.000	0.000	0.000	0.001	0.001	0.014	0.000	0.024	298.793	0.802	0.1198649E-03	4.771022	0.1030123E-01	-0.3342778
06282011	19	0.000	0.009	0.016	0.000	0.000	0.000	0.001	0.001	0.016	0.000	0.025	298.013	0.826	0.2270937E-03	5.594626	0.9927817E-02	-0.2490827
06282011	20	0.000	0.007	0.013	0.000	0.000	0.000	0.001	0.001	0.018	0.000	0.025	297.737	0.837	0.3280640E-03	5.697561	0.8521349E-02	-0.1748193
06282011	21	0.000	0.007	0.012	0.000	0.000	0.000	0.001	0.001	0.020	0.000	0.025	297.462	0.853	0.4777312E-03	5.825139	0.7339544E-02	-0.1003628
06282011	22	0.001	0.008	0.011	0.000	0.000	0.000	0.001	0.001	0.022	0.000	0.025	296.806	0.881	0.1167178E-02	6.808702	0.6455213E-02	0.2315370E-01
06282011	23	0.001	0.008	0.011	0.000	0.000	0.000	0.001	0.001	0.024	0.000	0.024	296.332	0.898	0.2441406E-02	7.568248	0.5622653E-02	0.1290541
06282011	24	0.001	0.007	0.011	0.000	0.000	0.000	0.001	0.001	0.026	0.000	0.024	295.947	0.912	0.3905416E-02	8.296232	0.5331118E-02	0.1920627
06292011	01	0.001	0.006	0.010	0.000	0.000	0.000	0.001	0.001	0.028	0.000	0.022	295.613	0.926	0.1000571E-01	9.465454	0.4406753E-02	0.3320227
06292011	02	0.002	0.006	0.010	0.000	0.000	0.000	0.001	0.001	0.029	0.000	0.021	295.387	0.934	0.1557499E-01	9.003596	0.3863655E-02	0.3674177
06292011	03	0.003	0.005	0.009	0.000	0.000	0.000	0.001	0.001	0.031	0.000	0.019	295.276	0.933	0.5301452E-01	8.361073	0.3239508E-02	0.4117829
06292011	04	0.003	0.006	0.009	0.000	0.000	0.000	0.001	0.001	0.033	0.001	0.018	295.205	0.931	NaN	8.721064	0.3307694E-02	0.4210442
06292011	05	0.007	0.007	0.009	0.000	0.001	0.000	0.001	0.001	0.032	0.001	0.018	295.144	0.927	NaN	9.936672	0.1660864E-02	0.7769070
06292011	06	0.009	0.012	0.010	0.000	0.001	0.000	0.002	0.001	0.030	0.001	0.018	295.054	0.924	NaN	8.971170	0.1681444E-02	0.7271667
06292011	07	0.008	0.028	0.015	0.000	0.001	0.000	0.002	0.001	0.029	0.001	0.018	295.557	0.914	NaN	7.663441	0.5212361E-02	0.1673893
06292011	08	0.004	0.080	0.037	0.000	0.001	0.000	0.003	0.001	0.034	0.001	0.021	297.105	0.861	NaN	5.054050	0.2976176E-01	-0.7700190
06292011	09	0.002	0.153	0.056	0.000	0.001	0.000	0.002	0.001	0.046	0.001	0.033	298.846	0.796	0.2199590E-02	5.150424	0.5624287E-02	-0.3822454E-01
06292011	10	0.001	0.139	0.050	0.000	0.001	0.000	0.001	0.001	0.046	0.001	0.037	300.561	0.734	0.4522800E-03	4.289945	0.5170936E-02	-0.8111744E-01
06292011	11	0.001	0.110	0.049	0.000	0.001	0.000	0.001	0.001	0.041	0.001	0.039	302.277	0.673	0.1248121E-03	3.702465	0.3184525E-02	0.6544634E-01
06292011	12	0.000	0.070	0.045	0.000	0.001	0.000	0.001	0.001	0.033	0.000	0.041	303.775	0.616	0.1049042E-04	3.736697	0.6477784E-02	-0.2389386
06292011	13	0.000	0.046	0.041	0.000	0.001	0.000	0.001	0.001	0.028	0.000	0.044	304.974	0.573	0.3337860E-05	4.009559	0.1396601E-01	-0.5419757
06292011	14	0.000	0.035	0.040	0.000	0.001	0.000	0.001	0.001	0.027	0.000	0.049	305.631	0.548	0.2622604E-05	4.580616	0.2003144E-01	-0.6407883
06292011	15	0.000	0.035	0.040	0.000	0.001	0.000	0.001	0.001	0.028	0.000	0.052	305.609	0.544	0.2443790E-05	4.801943	0.2206010E-01	-0.6621904
06292011	16	0.000	0.038	0.037	0.000	0.001	0.000	0.001	0.001	0.031	0.000	0.053	305.252	0.554	0.2861023E-05	4.836534	0.2008292E-01	-0.6182925
06292011	17	0.000	0.046	0.033	0.000	0.001	0.000	0.001	0.002	0.036	0.000	0.053	304.658	0.564	0.3457069E-05	4.426425	0.1402668E-01	-0.5009018
06292011	18	0.000	0.046	0.027	0.000	0.001	0.000	0.001	0.002	0.043	0.000	0.053	304.015	0.579	0.6616116E-05	4.136569	0.7316328E-02	-0.2476530
06292011	19	0.001	0.031	0.019	0.001	0.001	0.000	0.001	0.002	0.054	0.000	0.053	303.045	0.632	0.000000	4.301984	0.3082909E-02	0.1447080
06292011	20	0.001	0.024	0.011	0.002	0.001	0.000	0.002	0.003	0.058	0.000	0.050	303.691	0.453	0.000000	1.955642	0.2039853E-02	-0.1830942E-01
06292011	21	0.001	0.020	0.005	0.003	0.001	0.000	0.001	0.002	0.049	0.000	0.046	303.153	0.451	0.000000	1.888360	0.1106517E-02	0.2321267
06292011	22	0.000	0.013	0.005	0.004	0.001	0.000	0.001	0.002	0.041	0.000	0.043	302.358	0.515	0.000000	2.345982	0.1193554E-02	0.2934824
06292011	23	0.000	0.012	0.004	0.003	0.001	0.000	0.001	0.001	0.031	0.000	0.040	300.442	0.642	0.000000	3.991311	0.7732598E-02	-0.2872099
06292011	24	0.000	0.011	0.004	0.003	0.002	0.000	0.001	0.001	0.028	0.000	0.041	299.875	0.686	0.000000	5.120660	0.1139199E-01	-0.3472736
07022011	01	0.009	0.053	0.008	0.002	0.002	0.002	0.004	0.009	0.061	0.001	0.044	297.747	0.761	0.8620024E-03	8.058143	0.5465407E-02	0.1686125
07022011	02	0.014	0.043	0.006	0.003	0.002	0.002	0.004	0.010	0.046	0.001	0.038	297.274	0.802	0.4667199E-01	4.883034	0.1301137E-03	1.574367
07022011	03	0.014	0.036	0.004	0.003	0.002	0.002	0.005	0.011	0.034	0.001	0.033	296.882	0.825	0.4714417E-01	4.428819	0.9072506E-04	1.688561
07022011	04	0.015	0.031	0.004	0.003	0.002	0.002	0.005	0.011	0.025	0.001	0.029	296.720	0.827	0.3852445E-01	3.632006	0.7121080E-04	1.707601
07022011	05	0.016	0.027	0.004	0.003	0.002	0.002	0.005	0.011	0.018	0.001	0.026	296.396	0.846	0.3487045E-01	3.381715	0.6051601E-04	1.747267
07022011	06	0.019	0.023	0.004	0.002	0.002	0.002	0.005	0.012	0.014	0.001	0.024	296.254	0.855	0.2990192E-01	2.877507	0.4456900E-04	1.809983
07022011	07	0.022	0.021	0.005	0.002	0.003	0.002	0.006	0.012	0.010	0.001	0.023	297.101	0.862	0.3208029E-01	2.655725	0.2654814E-04	2.000149
07022011	08	0.020	0.017	0.010	0.002	0.003	0.002	0.006	0.013	0.007	0.002	0.022	299.677	0.771	0.1081574E-01	1.448923	0.1657852E-04	1.941500
07022011	09	0.015	0.046	0.021	0.001	0.003	0.002	0.004	0.008	0.022	0.001	0.024	301.767	0.689	0.9109437E-02	1.927887	0.5920324E-04	1.512736
07022011	10	0.007	0.078	0.025	0.000	0.003	0.001	0.003	0.005	0.036	0.001	0.028	303.982	0.595	0.1271355E-01	2.885524	0.5783533E-02	-0.3019685
07022011	11	0.001	0.141	0.024	0.000	0.002	0.001	0.002	0.003	0.034	0.000	0.033	305.986	0.512	0.4959106E-04	1.659113	0.2232317E-02	-0.1288800
07022011	12	0.000	0.189	0.024	0.000	0.002	0.000	0.001	0.003	0.029	0.000	0.041	307.737	0.448	0.2384186E-06	2.131529	0.6277962E-02	-0.4691273
07022011	13	0.000	0.217	0.028	0.000	0.001	0.000	0.001	0.002	0.027	0.000	0.050	309.406	0.395	0.1192093E-06	3.092110	0.1936765E-01	-0.7968220
07022011	14	0.000	0.144	0.026	0.000	0.001	0.000	0.001	0.002	0.023	0.000	0.069	307.029	0.461	0.1072884E-05	6.196357	0.4338021E-01	-0.8451552
07022011	15	0.000	0.091	0.022	0.000	0.001	0.000	0.001	0.002	0.025	0.000	0.083	306.756	0.460	0.1490116E-05	7.728258	0.5583973E-01	-0.8588617
07022011	16	0.000	0.088	0.024	0.000	0.001	0.000	0.001	0.002	0.031	0.000	0.084	307.891	0.410	0.5364418E-06	6.606264	0.5025342E-01	-0.8812098
07022011	17	0.000	0.076	0.024	0.000	0.001	0.000	0.001	0.002	0.035	0.000	0.081	306.801	0.429	0.7152557E-06	6.280600	0.4316194E-01	-0.8370998
07022011	18	0.000	0.042	0.017	0.000	0.001	0.000	0.001	0.002	0.033	0.000	0.072	305.076	0.461	0.1132488E-05	5.812642	0.3618587E-01	-0.7941654
07022011	19	0.000	0.027	0.013	0.001	0.001	0.000	0.001	0.002	0.034	0.000	0.066	304.367	0.491	0.000000	5.414759	0.2912323E-01	-0.7306604
07022011	20	0.000	0.027	0.013	0.001	0.001	0.000	0.001	0.002	0.041	0.000	0.067	302.677	0.509	0.000000	5.289850	0.2311501E-01	-0.6404506
07022011	21	0.000	0.030	0.015	0.001	0.001	0.000	0.002	0.003	0.049	0.000	0.066	300.979	0.545	0.000000	4.918316	0.1222012E-01	-0.3952592
07022011	22	0.000	0.033	0.016	0.001	0.001	0.001	0.002	0.003	0.055	0.000	0.065	299.701	0.595	0.000000	5.106689	0.5019166E-02	0.7507853E-02
07022011	23	0.001	0.035	0.016	0.001	0.001	0.001	0.002	0.004	0.060	0.000	0.062	298.791	0.647	0.000000	5.332825	0.4099241E-02	0.1142539
07022011	24	0.001	0.034	0.015	0.001	0.001	0.001	0.002	0.004	0.066	0.001	0.058	298.068	0.703	0.000000	5.796560	0.6832995E-02	-0.7144078E-01
07032011	01	0.002	0.033	0.014	0.001	0.001	0.001	0.003	0.005	0.071	0.001	0.053	297.432	0.765	0.000000	6.815250	0.7355122E-02	-0.3310809E-01
07032011	02	0.004	0.032	0.014	0.001	0.001	0.001	0.003	0.005	0.072	0.001	0.048	297.014	0.804	0.000000	7.302729	0.5215200E-02	0.1462142
07032011	03	0.005	0.031	0.014	0.001	0.001	0.001	0.003	0.005	0.072	0.001	0.045	296.778	0.821	0.6473064E-03	8.717908	0.4852183E-02	0.2544751
07032011	04	0.010	0.031	0.013	0.001	0.001	0.001	0.003	0.005	0.069	0.002	0.042	296.602	0.830	0.5246252E-01	7.388139	0.3004339E-03	1.390786
07032011	05	0.015	0.031	0.013	0.001	0.001	0.001	0.003	0.006	0.064	0.002	0.040	296.462	0.837	0.5058742E-01	7.185520	0.2819267E-03	1.406322
07032011	06	0.020	0.031	0.013	0.001	0.002	0.001	0.004	0.006	0.058	0.002	0.038	296.402	0.843	0.4937971E-01	6.773440	0.2505733E-03	1.431875
07032011	07	0.024	0.031	0.013	0.001	0.002	0.001	0.004	0.007	0.052	0.002	0.037	297.318	0.849	0.4459721E-01	6.722779	0.2191733E-03	1.486761
07032011	08	0.023	0.027	0.015	0.001	0.002	0.002	0.005	0.009	0.046	0.002	0.036	299.582	0.787	0.2622682E-01	4.501039	0.1439750E-03	1.495026
07032011	09	0.039	0.104	0.038	0.000	0.003	0.002	0.004	0.009	0.038	0.002	0.033	301.200	0.731	NaN	5.631905	0.1274211E-02	0.6454141
07032011	10	0.036	0.149	0.041	0.000	0.002	0.001	0.003	0.007	0.044	0.001	0.032	303.172	0.662	NaN	4.255548	0.3023186E-02	0.1484908
07032011	11	0.013	0.175	0.043	0.000	0.002	0.001	0.002	0.005	0.055	0.000	0.038	305.552	0.563	NaN	2.802408	0.2872087E-01	-1.010666
07032011	12	0.001	0.152	0.040	0.000	0.001	0.000	0.001	0.003	0.046	0.000	0.046	307.020	0.508	0.2110004E-04	2.331280	0.1494206E-02	0.1931840
07032011	13	0.000	0.086	0.031	0.000	0.001	0.000	0.001	0.002	0.035	0.000	0.053	307.872	0.490	0.7748604E-06	3.687081	0.1457329E-01	-0.5968750
07032011	14	0.000	0.022	0.017	0.000	0.001	0.000	0.001	0.001	0.027	0.000	0.054	306.697	0.524	0.1788139E-05	4.901043	0.2501468E-01	-0.7079064
07032011	15	0.000	0.003	0.009	0.000	0.000	0.000	0.000	0.001	0.025	0.000	0.042	306.076	0.540	0.1788139E-05	3.780020	0.1684966E-01	-0.6490971
07032011	16	0.000	0.001	0.006	0.000	0.000	0.000	0.000	0.000	0.023	0.000	0.031	306.344	0.531	0.1132488E-05	2.464813	0.8424850E-02	-0.5337782
07032011	17	0.000	0.001	0.005	0.000	0.000	0.000	0.000	0.000	0.021	0.000	0.025	306.333	0.521	0.7748604E-06	1.741073	0.4282210E-02	-0.3908511
07032011	18	0.000	0.000	0.004	0.000	0.000	0.000	0.000	0.000	0.018	0.000	0.018	305.851	0.516	0.1788139E-05	1.031518	0.5046056E-03	0.3105249
07032011	19	0.001	0.000	0.003	0.000	0.000	0.000	0.000	0.000	0.016	0.000	0.014	304.793	0.526	0.1239777E-04	0.7995983	0.3045462E-03	0.4192187
07032011	20	0.001	0.000	0.002	0.000	0.000	0.000	0.000	0.000	0.014	0.000	0.010	303.106	0.585	0.3522635E-04	0.6720430	0.1167924E-02	-0.2400176
07032011	21	0.001	0.000	0.002	0.000	0.000	0.000	0.000	0.000	0.010	0.000	0.008	301.880	0.630	0.3290176E-04	0.6388164	0.6926342E-03	-0.3512794E-01
07032011	22	0.001	0.001	0.002	0.000	0.000	0.000	0.000	0.000	0.008	0.000	0.007	300.949	0.670	0.3606081E-04	0.6611236	0.5654874E-03	0.6785979E-01
07032011	23	0.001	0.001	0.002	0.000	0.000	0.000	0.000	0.000	0.007	0.000	0.006	300.192	0.710	0.5561113E-04	0.6577287	0.6396892E-03	0.1207777E-01
07032011	24	0.001	0.001	0.001	0.000	0.000	0.000	0.000	0.000	0.005	0.000	0.005	299.559	0.748	0.5167723E-04	0.6638497	0.5474432E-03	0.8373062E-01
07042011	01	0.001	0.000	0.001	0.000	0.000	0.000	0.000	0.000	0.005	0.000	0.004	299.070	0.783	0.1397729E-03	0.5747127	0.5243673E-03	0.3981517E-01
07042011	02	0.001	0.000	0.001	0.000	0.000	0.000	0.000	0.000	0.004	0.000	0.003	298.558	0.822	0.3724098E-03	0.5411486	0.3096780E-03	0.2424062
07042011	03	0.001	0.000	0.001	0.000	0.000	0.000	0.000	0.000	0.005	0.000	0.003	298.199	0.848	0.2452731E-03	0.6711410	0.5273941E-03	0.1046785
07042011	04	0.001	0.000	0.001	0.000	0.000	0.000	0.000	0.000	0.005	0.000	0.003	298.222	0.817	0.1933575E-03	0.5671077	0.5618327E-03	0.4058592E-02
07042011	05	0.001	0.000	0.000	0.000	0.000	0.000	0.000	0.000	0.005	0.000	0.004	297.855	0.847	NaN	0.8438820	0.1638163E-02	-0.2880753
07042011	06	0.001	0.000	0.000	0.000	0.000	0.000	0.000	0.000	0.005	0.000	0.004	297.572	0.881	NaN	1.047120	0.1608167E-02	-0.1863344
07042011	07	0.001	0.000	0.001	0.000	0.000	0.000	0.000	0.000	0.005	0.000	0.006	298.208	0.875	0.2607703E-03	1.694915	0.1442986E-02	0.6988595E-01
07042011	08	0.001	0.000	0.001	0.000	0.000	0.000	0.000	0.000	0.007	0.000	0.008	299.940	0.820	0.1043081E-03	1.538462	0.1494532E-02	0.1258156E-01
07042011	09	0.000	0.002	0.003	0.000	0.000	0.000	0.000	0.000	0.009	0.000	0.012	301.235	0.762	0.2902746E-04	1.999189	0.3919716E-02	-0.2924007
07042011	10	0.000	0.003	0.006	0.000	0.000	0.000	0.000	0.000	0.011	0.000	0.014	302.854	0.688	0.1025200E-04	1.764340	0.3684690E-02	-0.3198188
07042011	11	0.000	0.003	0.007	0.000	0.000	0.000	0.000	0.000	0.013	0.000	0.015	304.683	0.617	0.3576279E-05	1.403869	0.2447646E-02	-0.2414220
07042011	12	0.000	0.003	0.008	0.000	0.000	0.000	0.000	0.000	0.010	0.000	0.013	305.856	0.572	0.9536743E-06	1.133335	0.3237878E-02	-0.4559022
07042011	13	0.000	0.001	0.004	0.000	0.000	0.000	0.000	0.000	0.008	0.000	0.010	305.208	0.580	0.9536743E-06	0.8735925	0.2200688E-02	-0.4012496
07042011	14	0.002	0.000	0.002	0.000	0.000	0.000	0.000	0.000	0.010	0.000	0.007	305.522	0.570	0.6633997E-04	0.4858491	0.6670624E-03	-0.1376651
07042011	15	0.002	0.000	0.002	0.000	0.000	0.000	0.000	0.000	0.013	0.000	0.007	305.881	0.552	0.2968311E-04	0.5196733	0.1564338E-02	-0.4786001
07042011	16	0.001	0.000	0.001	0.000	0.000	0.000	0.000	0.000	0.011	0.000	0.006	304.313	0.617	0.1239938E-01	0.5454546	0.1239946E-04	1.643356
07042011	17	0.001	0.000	0.001	0.000	0.000	0.000	0.000	0.000	0.007	0.000	0.005	303.184	0.659	0.6055832E-04	0.4509962	0.5673855E-03	-0.9970534E-01
07042011	18	0.001	0.000	0.001	0.000	0.000	0.000	0.000	0.000	0.006	0.000	0.005	302.268	0.704	0.4565716E-04	0.5193141	0.4855391E-03	0.2920588E-01
07042011	19	0.002	0.000	0.000	0.000	0.000	0.000	0.000	0.000	0.000	0.000	0.000	301.078	0.768	NaN	0.1000000E-10	0.1000000E-13	0.000000
07042011	20	0.003	0.000	0.000	0.000	0.000	0.000	0.000	0.000	0.000	0.000	0.000	299.754	0.823	NaN	0.1000000E-10	0.1000000E-13	0.000000
07042011	21	0.005	0.000	0.000	0.000	0.000	0.000	0.000	0.000	0.000	0.000	0.000	298.859	0.858	NaN	0.1000000E-10	0.1000000E-13	0.000000
07042011	22	0.005	0.000	0.000	0.000	0.000	0.000	0.000	0.000	0.000	0.000	0.000	298.228	0.879	NaN	0.1000000E-10	0.1000000E-13	0.000000
07042011	23	0.006	0.000	0.000	0.000	0.000	0.000	0.000	0.000	0.000	0.000	0.000	297.758	0.895	NaN	0.1000000E-10	0.1000000E-13	0.000000
07042011	24	0.007	0.000	0.001	0.000	0.000	0.000	0.000	0.000	0.000	0.000	0.000	297.440	0.907	0.000000	0.1000000E-10	0.9501479E-15	1.022209
07052011	01	0.009	0.000	0.001	0.000	0.000	0.000	0.000	0.000	0.000	0.000	0.000	297.213	0.914	0.000000	0.1000000E-10	0.7287154E-15	1.137442
07052011	02	0.010	0.000	0.001	0.000	0.000	0.000	0.000	0.000	0.000	0.000	0.000	297.028	0.918	0.000000	0.1000000E-10	0.6450380E-15	1.190415
07052011	03	0.010	0.001	0.001	0.000	0.000	0.000	0.000	0.000	0.000	0.000	0.000	296.871	0.921	0.000000	0.1000000E-10	0.6337835E-15	1.198059
07052011	04	0.009	0.001	0.001	0.000	0.000	0.000	0.000	0.000	0.000	0.000	0.000	296.712	0.926	0.000000	0.1000000E-10	0.6894136E-15	1.161520
07052011	05	0.008	0.001	0.001	0.000	0.000	0.000	0.001	0.000	0.001	0.000	0.001	296.554	0.925	NaN	0.8102924	0.1618116E-04	1.699632
07052011	06	0.008	0.001	0.001	0.000	0.000	0.000	0.001	0.000	0.003	0.000	0.002	296.377	0.931	NaN	1.250311	0.3533440E-04	1.548820
07052011	07	0.007	0.001	0.002	0.000	0.001	0.000	0.001	0.000	0.007	0.000	0.005	296.972	0.920	NaN	2.496204	0.1643109E-03	1.181614
07052011	08	0.008	0.006	0.003	0.000	0.002	0.000	0.001	0.001	0.015	0.000	0.010	298.303	0.888	NaN	3.162985	0.2781526E-03	1.055814
07052011	09	0.004	0.026	0.009	0.000	0.002	0.000	0.001	0.002	0.024	0.000	0.017	299.734	0.836	0.2850175E-01	3.602299	0.3503109E-02	0.1212619E-01
07052011	10	0.001	0.046	0.014	0.000	0.001	0.000	0.001	0.001	0.021	0.000	0.022	300.878	0.787	0.2856851E-03	3.417930	0.3423329E-02	-0.6853853E-03
07052011	11	0.000	0.019	0.011	0.000	0.000	0.000	0.000	0.001	0.016	0.000	0.020	301.968	0.745	0.4506111E-04	2.887228	0.4906462E-02	-0.2302873
07052011	12	0.000	0.007	0.009	0.000	0.000	0.000	0.000	0.000	0.013	0.000	0.017	303.200	0.691	0.1156330E-04	2.173049	0.4803781E-02	-0.3445137
07052011	13	0.000	0.004	0.007	0.000	0.000	0.000	0.000	0.000	0.012	0.000	0.014	304.672	0.617	0.3218651E-05	1.321225	0.2411473E-02	-0.2613057
07052011	14	0.000	0.002	0.006	0.000	0.000	0.000	0.000	0.000	0.011	0.000	0.012	304.961	0.599	0.2443790E-05	1.002583	0.1340776E-02	-0.1262361
07052011	15	0.000	0.002	0.004	0.000	0.000	0.000	0.000	0.000	0.009	0.000	0.011	304.350	0.619	0.2384186E-05	1.073291	0.2314951E-02	-0.3338243
07052011	16	0.000	0.003	0.004	0.000	0.000	0.000	0.000	0.000	0.009	0.000	0.013	303.542	0.650	0.4112720E-05	1.536018	0.4467997E-02	-0.4637164
07052011	17	0.000	0.004	0.003	0.000	0.000	0.000	0.000	0.000	0.009	0.000	0.015	302.323	0.697	0.1049042E-04	2.198315	0.6750701E-02	-0.4872590
07052011	18	0.000	0.004	0.003	0.000	0.000	0.000	0.000	0.000	0.010	0.000	0.016	301.165	0.747	0.2759695E-04	2.744153	0.7064347E-02	-0.4106636
07052011	19	0.000	0.003	0.002	0.000	0.000	0.000	0.000	0.000	0.010	0.000	0.016	300.147	0.795	0.6705523E-04	3.344690	0.7376974E-02	-0.3435223
07052011	20	0.000	0.003	0.002	0.000	0.000	0.000	0.000	0.000	0.010	0.000	0.016	299.046	0.828	0.1221895E-03	3.845210	0.7626620E-02	-0.2974121
07052011	21	0.000	0.003	0.002	0.000	0.000	0.000	0.000	0.000	0.013	0.000	0.016	298.273	0.855	0.3155470E-03	4.223781	0.5463887E-02	-0.1118004
07052011	22	0.001	0.002	0.002	0.000	0.000	0.000	0.000	0.000	0.016	0.000	0.015	297.691	0.875	0.9688139E-03	4.154465	0.2887553E-02	0.1579852
07052011	23	0.001	0.002	0.002	0.000	0.000	0.000	0.001	0.000	0.018	0.000	0.014	297.248	0.888	0.2467334E-02	4.045505	0.3051578E-02	0.1224483
07052011	24	0.002	0.002	0.002	0.000	0.000	0.000	0.001	0.000	0.021	0.000	0.014	296.907	0.895	0.8191764E-02	4.456184	0.2928759E-02	0.1822795
07062011	01	0.002	0.002	0.002	0.000	0.000	0.000	0.001	0.000	0.024	0.000	0.013	296.620	0.901	NaN	4.251266	0.7030205E-03	0.7815502
07062011	02	0.004	0.002	0.003	0.000	0.000	0.000	0.001	0.000	0.023	0.000	0.013	296.384	0.907	NaN	4.716687	0.1100685E-02	0.6319739
07062011	03	0.006	0.003	0.003	0.000	0.000	0.000	0.001	0.000	0.023	0.000	0.012	296.234	0.910	NaN	4.792474	0.4570162E-03	1.020628
07062011	04	0.007	0.003	0.003	0.000	0.000	0.000	0.001	0.000	0.023	0.000	0.012	296.127	0.911	NaN	4.852372	0.3809867E-03	1.105044
07062011	05	0.008	0.004	0.003	0.000	0.000	0.000	0.001	0.000	0.023	0.000	0.012	296.040	0.913	NaN	4.898934	0.3236312E-03	1.180051
07062011	06	0.008	0.005	0.003	0.000	0.001	0.000	0.001	0.000	0.023	0.000	0.012	295.978	0.918	NaN	5.568689	0.2652306E-03	1.322129
07062011	07	0.009	0.005	0.003	0.000	0.001	0.000	0.001	0.000	0.023	0.000	0.012	296.672	0.918	NaN	5.581962	0.2460879E-03	1.355697
07062011	08	0.002	0.015	0.005	0.000	0.001	0.000	0.001	0.000	0.021	0.000	0.014	297.802	0.855	0.5531013E-02	3.260988	0.2930515E-02	0.4640533E-01
07062011	09	0.000	0.059	0.012	0.000	0.001	0.000	0.000	0.000	0.015	0.000	0.019	299.273	0.796	0.000000	3.604151	0.5643489E-02	-0.1947448
07062011	10	0.000	0.069	0.014	0.000	0.001	0.000	0.000	0.001	0.015	0.000	0.020	300.738	0.741	0.4255772E-04	2.792085	0.4867531E-02	-0.2413801
07062011	11	0.000	0.084	0.015	0.000	0.001	0.000	0.000	0.001	0.015	0.000	0.021	302.265	0.680	0.1341105E-04	2.424745	0.5206662E-02	-0.3318932
07062011	12	0.000	0.093	0.015	0.000	0.001	0.000	0.000	0.001	0.015	0.000	0.021	303.759	0.616	0.4351139E-05	1.991498	0.4782923E-02	-0.3805135
07062011	13	0.000	0.100	0.015	0.000	0.001	0.000	0.000	0.001	0.014	0.000	0.020	305.082	0.562	0.1251698E-05	1.584413	0.4472079E-02	-0.4506412
07062011	14	0.000	0.095	0.014	0.000	0.000	0.000	0.000	0.000	0.015	0.000	0.020	305.732	0.539	0.9536743E-06	1.624655	0.5300644E-02	-0.5135673
07062011	15	0.000	0.092	0.015	0.000	0.000	0.000	0.000	0.000	0.017	0.000	0.020	305.672	0.538	0.9536743E-06	1.468316	0.3279936E-02	-0.3490459
07062011	16	0.000	0.087	0.015	0.000	0.000	0.000	0.000	0.000	0.019	0.000	0.021	305.372	0.543	0.1251698E-05	1.451836	0.2319687E-02	-0.2035118
07062011	17	0.000	0.079	0.015	0.000	0.000	0.000	0.000	0.001	0.020	0.000	0.021	304.791	0.554	0.3457069E-05	1.279590	0.1080778E-02	0.7333460E-01
07062011	18	0.001	0.069	0.013	0.000	0.000	0.000	0.000	0.001	0.022	0.000	0.021	304.157	0.562	0.1841784E-04	1.290444	0.1169421E-02	0.4276829E-01
07062011	19	0.001	0.058	0.012	0.000	0.000	0.000	0.001	0.001	0.025	0.000	0.021	303.327	0.570	0.4404783E-04	1.277315	0.1978663E-02	-0.1900740
07062011	20	0.002	0.045	0.010	0.000	0.000	0.000	0.001	0.001	0.029	0.000	0.022	301.459	0.642	0.1527667E-03	1.693504	0.4015118E-02	-0.3749120
07062011	21	0.003	0.035	0.009	0.000	0.001	0.000	0.001	0.002	0.033	0.000	0.023	300.375	0.667	0.1225829E-02	2.101904	0.4284638E-02	-0.3093013
07062011	22	0.005	0.032	0.009	0.001	0.001	0.001	0.002	0.003	0.037	0.000	0.024	299.581	0.698	0.2221352E-01	2.502798	0.8382049E-04	1.475076
07062011	23	0.007	0.032	0.011	0.001	0.001	0.001	0.003	0.004	0.038	0.000	0.025	298.937	0.734	0.2338850E-01	2.756661	0.1062459E-03	1.414071
07062011	24	0.009	0.035	0.014	0.001	0.002	0.001	0.003	0.005	0.037	0.001	0.027	298.340	0.779	0.2419418E-01	3.504354	0.1385112E-03	1.403123
07072011	01	0.010	0.040	0.019	0.001	0.002	0.001	0.004	0.006	0.037	0.001	0.028	297.818	0.825	0.2508646E-01	4.403279	0.1687756E-03	1.416467
07072011	02	0.006	0.045	0.024	0.001	0.003	0.001	0.005	0.008	0.038	0.001	0.030	297.466	0.855	0.2581269E-01	5.252240	0.2001921E-03	1.418898
07072011	03	0.005	0.049	0.026	0.001	0.003	0.001	0.005	0.009	0.038	0.001	0.031	297.289	0.865	0.2522469E-03	10.22209	0.4550301E-02	0.3514996
07072011	04	0.005	0.051	0.025	0.001	0.003	0.002	0.005	0.010	0.037	0.001	0.031	297.202	0.870	0.2549940E-01	5.380975	0.1911327E-03	1.449526
07072011	05	0.005	0.053	0.021	0.001	0.003	0.002	0.005	0.010	0.034	0.001	0.030	297.089	0.880	0.2918243E-03	11.56586	0.4580932E-02	0.4022241
07072011	06	0.005	0.054	0.018	0.001	0.003	0.002	0.005	0.011	0.030	0.001	0.029	297.051	0.890	0.2574325E-03	11.95099	0.4452160E-02	0.4288332
07072011	07	0.006	0.054	0.019	0.001	0.004	0.002	0.005	0.011	0.026	0.001	0.027	297.993	0.890	0.2353251E-01	4.773891	0.1212323E-03	1.595254
07072011	08	0.010	0.062	0.028	0.001	0.004	0.002	0.005	0.011	0.017	0.001	0.024	300.734	0.807	0.9371996E-02	2.430237	0.6524450E-04	1.571105
07072011	09	0.007	0.271	0.054	0.000	0.003	0.001	0.003	0.006	0.018	0.001	0.022	302.254	0.734	0.7253110E-02	2.403131	0.3781621E-02	-0.1969005
07072011	10	0.000	0.393	0.056	0.000	0.001	0.000	0.001	0.002	0.017	0.000	0.031	303.760	0.652	0.8881092E-05	3.540278	0.1114851E-01	-0.4981793
07072011	11	0.000	0.233	0.040	0.000	0.001	0.000	0.001	0.001	0.014	0.000	0.030	304.951	0.598	0.3695488E-05	3.297859	0.1389216E-01	-0.6245377
07072011	12	0.000	0.148	0.031	0.000	0.000	0.000	0.001	0.001	0.013	0.000	0.033	305.913	0.550	0.1907349E-05	3.470872	0.1885026E-01	-0.7348788
07072011	13	0.000	0.109	0.027	0.000	0.000	0.000	0.000	0.001	0.013	0.000	0.033	306.850	0.506	0.1072884E-05	3.224432	0.1978472E-01	-0.7878768
07072011	14	0.000	0.073	0.022	0.000	0.000	0.000	0.000	0.001	0.013	0.000	0.031	307.700	0.482	0.5960464E-06	2.761042	0.1760903E-01	-0.8046623
07072011	15	0.000	0.041	0.017	0.000	0.000	0.000	0.000	0.001	0.012	0.000	0.026	307.280	0.483	0.4172325E-06	2.212955	0.1348143E-01	-0.7847632
07072011	16	0.000	0.021	0.013	0.000	0.000	0.000	0.000	0.000	0.011	0.000	0.021	306.831	0.494	0.4172325E-06	1.834173	0.1034747E-01	-0.7513938
07072011	17	0.000	0.012	0.011	0.000	0.000	0.000	0.000	0.000	0.010	0.000	0.016	306.042	0.512	0.4172325E-06	1.343738	0.6244098E-02	-0.6671551
07072011	18	0.000	0.009	0.009	0.000	0.000	0.000	0.000	0.000	0.011	0.000	0.014	305.120	0.532	0.5364418E-06	1.065506	0.3191548E-02	-0.4764454
07072011	19	0.000	0.008	0.007	0.000	0.000	0.000	0.000	0.001	0.013	0.000	0.013	303.941	0.560	0.7152557E-05	0.7840520	0.7375490E-03	0.2655398E-01
07072011	20	0.001	0.007	0.006	0.000	0.000	0.000	0.001	0.001	0.015	0.000	0.013	302.165	0.619	0.5495548E-04	0.9080207	0.1861114E-02	-0.3116772
07072011	21	0.002	0.008	0.007	0.000	0.000	0.000	0.001	0.001	0.017	0.000	0.014	300.873	0.636	0.1054406E-03	1.047301	0.2823276E-02	-0.4306817
07072011	22	0.003	0.013	0.009	0.000	0.001	0.000	0.001	0.001	0.018	0.000	0.014	299.917	0.655	0.5306602E-03	1.241508	0.3110281E-02	-0.3988501
07072011	23	0.003	0.018	0.011	0.000	0.001	0.000	0.002	0.002	0.019	0.000	0.014	299.128	0.690	0.1359689E-01	1.568145	0.2899282E-02	-0.2669044
07072011	24	0.003	0.022	0.013	0.000	0.001	0.000	0.002	0.002	0.020	0.000	0.014	298.392	0.742	NaN	1.726430	0.8810726E-02	-0.7078627
07082011	01	0.003	0.024	0.014	0.000	0.001	0.000	0.002	0.002	0.022	0.000	0.014	297.716	0.802	NaN	2.419524	0.7144385E-02	-0.4702349
07082011	02	0.004	0.024	0.015	0.000	0.001	0.001	0.002	0.002	0.022	0.000	0.015	297.252	0.843	NaN	3.386860	0.6262395E-02	-0.2669432
07082011	03	0.006	0.023	0.015	0.000	0.001	0.001	0.002	0.003	0.021	0.000	0.015	297.003	0.860	NaN	4.063655	0.3873649E-02	0.2079658E-01
07082011	04	0.006	0.019	0.014	0.000	0.001	0.001	0.002	0.003	0.021	0.000	0.015	296.829	0.869	NaN	4.361457	0.3228013E-02	0.1306963
07082011	05	0.006	0.015	0.011	0.000	0.001	0.001	0.002	0.003	0.021	0.000	0.015	296.693	0.875	NaN	4.627777	0.1692021E-02	0.4369667
07082011	06	0.007	0.011	0.008	0.000	0.001	0.001	0.002	0.003	0.021	0.000	0.015	296.662	0.881	NaN	4.494390	0.6314708E-03	0.8523175
07082011	07	0.008	0.008	0.006	0.000	0.001	0.001	0.002	0.003	0.021	0.000	0.015	297.572	0.888	NaN	4.623949	0.3556685E-03	1.113968
07082011	08	0.006	0.006	0.005	0.000	0.001	0.001	0.002	0.003	0.021	0.000	0.015	300.114	0.804	NaN	2.445268	0.5238927E-03	0.6690841
07082011	09	0.002	0.017	0.017	0.000	0.001	0.000	0.001	0.001	0.019	0.000	0.016	301.954	0.734	0.2997518E-03	1.747227	0.3106592E-02	-0.2499350
07082011	10	0.000	0.067	0.019	0.000	0.001	0.000	0.001	0.001	0.015	0.000	0.019	303.914	0.639	0.9179115E-05	1.707238	0.2166329E-02	-0.1034302
07082011	11	0.000	0.147	0.019	0.000	0.001	0.000	0.000	0.001	0.020	0.000	0.022	305.333	0.575	0.4708767E-05	1.453326	0.1296985E-02	0.4942827E-01
07082011	12	0.001	0.129	0.016	0.000	0.001	0.000	0.000	0.000	0.025	0.000	0.020	306.578	0.527	0.000000	1.141807	0.1974451E-02	-0.2378536
07082011	13	0.001	0.070	0.014	0.000	0.001	0.000	0.000	0.001	0.027	0.000	0.024	305.987	0.531	0.2360344E-04	1.331081	0.1619911E-02	-0.8528671E-01
07082011	14	0.000	0.028	0.012	0.000	0.001	0.000	0.001	0.001	0.026	0.000	0.029	305.309	0.568	0.8285046E-05	1.960593	0.1445606E-02	0.1323376
07082011	15	0.001	0.019	0.010	0.001	0.001	0.000	0.001	0.001	0.028	0.000	0.029	305.646	0.544	0.000000	1.710985	0.1193007E-02	0.1566033
07082011	16	0.001	0.012	0.009	0.000	0.001	0.000	0.001	0.001	0.031	0.000	0.029	305.460	0.549	0.3141165E-04	1.738690	0.1634017E-02	0.2696554E-01
07082011	17	0.001	0.005	0.009	0.000	0.000	0.000	0.001	0.001	0.029	0.000	0.028	305.285	0.540	0.2026558E-04	1.608635	0.1238840E-02	0.1134422
07082011	18	0.001	0.003	0.007	0.000	0.000	0.000	0.001	0.001	0.025	0.000	0.022	304.954	0.533	0.2533197E-04	1.171434	0.1481068E-02	-0.1018572
07082011	19	0.001	0.002	0.004	0.001	0.000	0.000	0.001	0.001	0.025	0.000	0.020	303.990	0.587	0.000000	1.287582	0.2485518E-02	-0.2856421
07082011	20	0.001	0.001	0.003	0.001	0.000	0.000	0.001	0.001	0.023	0.000	0.019	302.115	0.656	0.000000	1.598489	0.2599750E-02	-0.2112220
07082011	21	0.001	0.000	0.002	0.001	0.000	0.000	0.001	0.001	0.020	0.000	0.017	301.169	0.671	0.000000	1.481187	0.2372171E-02	-0.2045360
07082011	22	0.001	0.000	0.002	0.001	0.000	0.000	0.001	0.001	0.018	0.000	0.016	300.672	0.659	0.000000	1.346027	0.2007556E-02	-0.1736141
07082011	23	0.001	0.000	0.001	0.001	0.000	0.000	0.001	0.001	0.016	0.000	0.016	299.884	0.706	0.000000	1.684828	0.1889757E-02	-0.4985038E-01
07082011	24	0.001	0.000	0.001	0.002	0.000	0.000	0.001	0.001	0.016	0.000	0.016	299.187	0.774	0.000000	2.179818	0.2405470E-02	-0.4277971E-01
07092011	01	0.001	0.000	0.001	0.001	0.000	0.000	0.001	0.001	0.016	0.000	0.017	298.645	0.831	0.000000	3.188848	0.3216800E-02	-0.3790306E-02
07092011	02	0.001	0.000	0.001	0.001	0.000	0.000	0.001	0.001	0.017	0.000	0.017	298.251	0.873	0.000000	4.078293	0.3534462E-02	0.6215504E-01
07092011	03	0.001	0.001	0.001	0.002	0.001	0.000	0.001	0.001	0.020	0.000	0.018	298.210	0.872	0.000000	4.252763	0.3519365E-02	0.8220692E-01
07092011	04	0.002	0.001	0.001	0.002	0.002	0.000	0.001	0.001	0.022	0.000	0.019	298.220	0.866	0.000000	4.427234	0.3601823E-02	0.8961012E-01
07092011	05	0.002	0.002	0.001	0.002	0.003	0.000	0.001	0.002	0.022	0.000	0.019	298.037	0.906	0.000000	5.988510	0.3382461E-02	0.2480860
07092011	06	0.002	0.004	0.002	0.002	0.005	0.001	0.001	0.002	0.020	0.000	0.019	298.017	0.915	0.000000	6.766716	0.3059661E-02	0.3447047
07092011	07	0.002	0.011	0.005	0.002	0.005	0.001	0.001	0.003	0.018	0.000	0.018	298.823	0.903	0.000000	4.872773	0.2697843E-02	0.2567595
07092011	08	0.003	0.022	0.011	0.003	0.004	0.001	0.002	0.003	0.018	0.001	0.017	300.743	0.833	0.2956390E-04	3.258859	0.3094021E-02	0.2254226E-01
07092011	09	0.004	0.041	0.023	0.002	0.003	0.000	0.002	0.003	0.022	0.001	0.018	302.100	0.779	0.2765656E-04	2.695888	0.3629728E-02	-0.1291722
07092011	10	0.004	0.050	0.029	0.001	0.003	0.000	0.002	0.003	0.026	0.002	0.019	303.895	0.707	0.7326901E-02	1.955746	0.8218500E-04	1.376520
07092011	11	0.004	0.056	0.032	0.001	0.002	0.000	0.001	0.002	0.027	0.001	0.021	305.480	0.644	0.000000	1.724713	0.4497454E-02	-0.4162498
07092011	12	0.002	0.059	0.038	0.000	0.001	0.000	0.001	0.002	0.024	0.001	0.021	306.681	0.592	0.6484985E-04	1.303637	0.2896143E-02	-0.3466632
07092011	13	0.001	0.059	0.036	0.000	0.001	0.000	0.001	0.002	0.024	0.001	0.022	307.711	0.550	0.3325939E-04	1.215039	0.2023100E-02	-0.2214273
07092011	14	0.001	0.025	0.022	0.000	0.001	0.000	0.001	0.001	0.024	0.001	0.026	306.546	0.578	0.1692772E-04	1.777499	0.1383584E-02	0.1088039
07092011	15	0.001	0.003	0.009	0.001	0.000	0.000	0.001	0.001	0.023	0.000	0.024	306.121	0.597	0.000000	1.729005	0.1429846E-02	0.8250719E-01
07092011	16	0.001	0.001	0.005	0.000	0.000	0.000	0.000	0.001	0.022	0.000	0.018	305.999	0.600	0.4476309E-04	1.220845	0.2153695E-02	-0.2465238
07092011	17	0.003	0.000	0.004	0.000	0.000	0.000	0.000	0.000	0.020	0.000	0.013	306.092	0.587	0.2107620E-03	0.9860734	0.9878128E-03	-0.7653945E-03
07092011	18	0.004	0.001	0.004	0.000	0.000	0.000	0.000	0.000	0.017	0.000	0.011	305.608	0.584	0.6662011E-03	0.8576891	0.3975657E-03	0.3339210
07092011	19	0.002	0.001	0.004	0.000	0.000	0.000	0.000	0.000	0.018	0.000	0.010	304.429	0.606	0.1248717E-03	0.8826125	0.1529021E-02	-0.2386433
07092011	20	0.003	0.001	0.004	0.000	0.000	0.000	0.001	0.000	0.016	0.000	0.008	302.435	0.705	NaN	1.053357	0.1147085E-02	-0.3702012E-01
07092011	21	0.002	0.001	0.004	0.000	0.000	0.000	0.001	0.000	0.016	0.000	0.009	301.427	0.741	NaN	1.196127	0.2372984E-02	-0.2975175
07092011	22	0.001	0.001	0.003	0.000	0.000	0.000	0.001	0.000	0.015	0.000	0.008	300.912	0.744	NaN	1.061899	0.1704550E-02	-0.2055264
07092011	23	0.001	0.000	0.003	0.000	0.000	0.000	0.001	0.000	0.013	0.000	0.007	300.260	0.776	NaN	1.088159	0.1680695E-02	-0.1887967
07092011	24	0.002	0.000	0.002	0.001	0.000	0.000	0.000	0.000	0.012	0.000	0.007	299.815	0.800	0.2944469E-04	1.200686	0.2187766E-02	-0.2605714
07102011	01	0.002	0.000	0.001	0.001	0.000	0.000	0.000	0.000	0.010	0.000	0.006	299.486	0.805	0.000000	1.079137	0.1982270E-02	-0.2640863
07102011	02	0.002	0.000	0.001	0.000	0.000	0.000	0.000	0.000	0.008	0.000	0.004	298.994	0.843	0.4988313E-03	0.8438820	0.3788882E-03	0.3477706
07102011	03	0.002	0.000	0.000	0.000	0.000	0.000	0.000	0.000	0.007	0.000	0.004	298.704	0.869	NaN	1.023018	0.4778223E-03	0.3306168
07102011	04	0.002	0.000	0.000	0.000	0.000	0.000	0.000	0.000	0.008	0.000	0.004	298.653	0.870	NaN	1.023018	0.4291262E-03	0.3772982
07102011	05	0.002	0.001	0.001	0.000	0.000	0.000	0.000	0.000	0.010	0.000	0.007	298.561	0.882	0.2611279E-02	1.873567	0.5415383E-03	0.5390400
07102011	06	0.001	0.002	0.002	0.000	0.000	0.000	0.000	0.000	0.012	0.000	0.010	298.566	0.898	0.1427412E-02	3.212792	0.1555296E-02	0.3150696
07102011	07	0.001	0.002	0.003	0.001	0.000	0.000	0.000	0.000	0.015	0.000	0.013	299.450	0.888	0.000000	3.854959	0.3234820E-02	0.7616959E-01
07102011	08	0.002	0.002	0.005	0.000	0.000	0.000	0.000	0.000	0.021	0.000	0.015	301.030	0.826	0.1037955E-02	2.811143	0.1566275E-02	0.2540148
07102011	09	0.001	0.002	0.010	0.000	0.000	0.000	0.000	0.001	0.019	0.000	0.016	302.314	0.778	0.2847910E-03	2.224183	0.2896791E-02	-0.1147466
07102011	10	0.001	0.002	0.010	0.000	0.000	0.000	0.000	0.001	0.016	0.000	0.014	303.827	0.717	0.1090169E-03	1.489798	0.2246696E-02	-0.1784168
07102011	11	0.001	0.001	0.008	0.000	0.000	0.000	0.000	0.001	0.015	0.000	0.013	305.111	0.671	0.6127357E-04	1.123044	0.1979809E-02	-0.2462264
07102011	12	0.001	0.001	0.008	0.000	0.000	0.000	0.000	0.001	0.014	0.000	0.012	306.096	0.622	0.3606081E-04	0.8485345	0.1780298E-02	-0.3218232
07102011	13	0.002	0.001	0.007	0.000	0.000	0.000	0.000	0.001	0.015	0.000	0.012	307.366	0.566	0.3767014E-04	0.7036163	0.2510711E-02	-0.5524608
07102011	14	0.003	0.000	0.004	0.000	0.000	0.000	0.000	0.001	0.013	0.000	0.009	307.473	0.566	0.6032705E-02	0.6289310	0.3326675E-02	-0.7234074
07102011	15	0.002	0.000	0.003	0.000	0.000	0.000	0.000	0.000	0.013	0.000	0.007	306.372	0.609	0.3713369E-04	0.6178288	0.1501679E-02	-0.3857090
07102011	16	0.003	0.000	0.003	0.000	0.000	0.000	0.000	0.000	0.011	0.000	0.006	305.332	0.646	0.5686283E-04	0.5964215	0.1032275E-02	-0.2382420
07102011	17	0.002	0.000	0.003	0.000	0.000	0.000	0.000	0.000	0.009	0.000	0.005	304.216	0.676	0.5072355E-04	0.5464481	0.1061993E-02	-0.2885728
07102011	18	0.004	0.000	0.003	0.000	0.000	0.000	0.000	0.000	0.009	0.000	0.005	303.140	0.716	0.1303554E-03	0.6242197	0.6006875E-03	0.1668892E-01
07102011	19	0.006	0.000	0.004	0.000	0.000	0.000	0.000	0.000	0.009	0.000	0.005	301.759	0.770	0.3448725E-03	0.7530121	0.3490805E-03	0.3338764
07102011	20	0.007	0.000	0.004	0.000	0.000	0.000	0.000	0.000	0.009	0.000	0.005	300.520	0.812	0.6886721E-03	0.8992805	0.2530151E-03	0.5507488
07102011	21	0.008	0.000	0.005	0.000	0.000	0.000	0.001	0.000	0.009	0.000	0.005	299.784	0.836	NaN	1.601753	0.2895322E-03	0.7428987
07102011	22	0.008	0.000	0.005	0.000	0.000	0.000	0.001	0.000	0.009	0.000	0.005	299.311	0.854	NaN	1.716909	0.2822698E-03	0.7840829
07102011	23	0.008	0.000	0.005	0.000	0.000	0.000	0.001	0.000	0.008	0.000	0.005	298.906	0.874	NaN	1.974529	0.3410058E-03	0.7627017
07102011	24	0.007	0.000	0.004	0.000	0.000	0.000	0.001	0.000	0.007	0.000	0.004	298.656	0.894	NaN	1.908001	0.2159392E-03	0.9462471
07112011	01	0.006	0.000	0.003	0.000	0.000	0.000	0.001	0.000	0.005	0.000	0.003	298.505	0.910	NaN	1.762505	0.1646933E-03	1.029454
07112011	02	0.005	0.000	0.002	0.000	0.000	0.000	0.001	0.000	0.004	0.000	0.003	298.478	0.905	NaN	1.453384	0.2038276E-03	0.8531172
07112011	03	0.003	0.000	0.001	0.000	0.000	0.000	0.000	0.000	0.004	0.000	0.003	298.381	0.914	0.5713105E-03	1.090909	0.3434283E-03	0.5019525
07112011	04	0.003	0.000	0.001	0.000	0.000	0.000	0.000	0.000	0.004	0.000	0.003	298.349	0.922	0.6849766E-03	1.224490	0.3285655E-03	0.5713332
07112011	05	0.003	0.000	0.001	0.000	0.000	0.000	0.000	0.000	0.004	0.000	0.002	298.304	0.929	0.9696484E-03	0.9345794	0.1160732E-03	0.9058842
07112011	06	0.003	0.000	0.001	0.000	0.000	0.000	0.000	0.000	0.005	0.000	0.003	298.354	0.928	0.1168907E-02	1.401869	0.2204738E-03	0.8033506
07112011	07	0.003	0.000	0.001	0.000	0.000	0.000	0.000	0.000	0.005	0.000	0.003	299.175	0.922	0.7768869E-03	1.224490	0.2465027E-03	0.6961334
07112011	08	0.003	0.000	0.001	0.000	0.000	0.000	0.000	0.000	0.005	0.000	0.003	300.603	0.864	0.2547503E-03	0.7159904	0.3368748E-03	0.3274387
07112011	09	0.000	0.000	0.001	0.000	0.000	0.000	0.000	0.000	0.003	0.000	0.004	301.225	0.845	0.4470348E-04	1.017625	0.1471728E-02	-0.1602399
07112011	10	0.000	0.000	0.000	0.000	0.000	0.000	0.000	0.000	0.000	0.000	0.001	302.074	0.824	NaN	0.2898551	0.1066314E-02	-0.5657041
07112011	11	0.002	0.000	0.001	0.000	0.000	0.000	0.000	0.000	0.000	0.000	0.000	303.022	0.799	0.000000	0.1000000E-10	0.4914256E-14	0.3085422
07112011	12	0.003	0.000	0.001	0.000	0.000	0.000	0.000	0.000	0.001	0.000	0.001	303.830	0.781	0.1740456E-04	0.1569859	0.2114340E-03	-0.1293143
07112011	13	0.002	0.000	0.002	0.000	0.000	0.000	0.000	0.000	0.003	0.000	0.002	304.637	0.743	0.1764297E-04	0.2684564	0.5843692E-03	-0.3378136
07112011	14	0.002	0.000	0.002	0.000	0.000	0.000	0.000	0.000	0.004	0.000	0.002	304.935	0.746	0.2592802E-04	0.2785515	0.4152560E-03	-0.1734103
07112011	15	0.001	0.000	0.002	0.000	0.000	0.000	0.000	0.000	0.004	0.000	0.003	304.594	0.759	0.1317263E-03	0.4071850	0.2358603E-03	0.2371369
07112011	16	0.001	0.000	0.002	0.000	0.000	0.000	0.000	0.000	0.004	0.000	0.003	304.279	0.763	0.1337528E-03	0.4071850	0.2410459E-03	0.2276920
07112011	17	0.001	0.000	0.003	0.000	0.000	0.000	0.000	0.000	0.004	0.000	0.004	303.411	0.763	0.4523993E-04	0.5502370	0.3571784E-03	0.1876646
07112011	18	0.001	0.000	0.003	0.000	0.000	0.000	0.000	0.000	0.005	0.000	0.005	303.480	0.772	0.5424023E-04	0.7258531	0.4685762E-03	0.1900685
07112011	19	0.001	0.000	0.003	0.000	0.000	0.000	0.000	0.000	0.006	0.000	0.005	302.689	0.786	0.1267791E-03	0.7695189	0.5060325E-03	0.1820408
07112011	20	0.002	0.000	0.003	0.000	0.000	0.000	0.000	0.000	0.008	0.000	0.006	301.416	0.836	0.7991195E-03	1.212455	0.4929609E-03	0.3908531
07112011	21	0.002	0.001	0.002	0.000	0.000	0.000	0.000	0.000	0.011	0.000	0.006	300.676	0.852	0.4349947E-03	1.342282	0.7272214E-03	0.2661771
07112011	22	0.004	0.001	0.002	0.000	0.000	0.000	0.001	0.000	0.013	0.000	0.007	300.186	0.862	NaN	1.751990	0.5166398E-03	0.5303438
07112011	23	0.005	0.001	0.002	0.000	0.000	0.000	0.001	0.000	0.014	0.000	0.008	299.788	0.873	NaN	2.114344	0.5527558E-03	0.5826424
07112011	24	0.005	0.001	0.002	0.000	0.000	0.000	0.001	0.000	0.015	0.000	0.008	299.414	0.888	NaN	2.537865	0.4185871E-03	0.7826827
07122011	01	0.005	0.001	0.002	0.000	0.000	0.000	0.001	0.000	0.016	0.000	0.009	299.041	0.905	NaN	3.354562	0.5256784E-03	0.8049156
07122011	02	0.004	0.001	0.002	0.000	0.000	0.000	0.001	0.000	0.017	0.000	0.009	298.812	0.903	NaN	3.051879	0.5150345E-03	0.7727310
07122011	03	0.004	0.001	0.002	0.000	0.001	0.000	0.001	0.000	0.018	0.000	0.010	298.531	0.919	NaN	4.188044	0.5087033E-03	0.9155467
07122011	04	0.004	0.001	0.002	0.000	0.001	0.000	0.001	0.000	0.019	0.000	0.010	298.347	0.927	NaN	4.886387	0.4045767E-03	1.081987
07122011	05	0.003	0.001	0.001	0.000	0.001	0.000	0.001	0.000	0.021	0.000	0.011	298.182	0.934	NaN	5.132864	0.2725388E-03	1.274932
07122011	06	0.002	0.001	0.002	0.000	0.001	0.000	0.001	0.000	0.017	0.000	0.013	297.991	0.942	0.1271188E-01	6.896658	0.2986125E-02	0.3635306
07122011	07	0.001	0.001	0.001	0.000	0.000	0.000	0.001	0.000	0.014	0.000	0.016	298.359	0.943	0.3099203E-02	8.778117	0.5304416E-02	0.2187638
07122011	08	0.000	0.001	0.002	0.000	0.000	0.000	0.000	0.000	0.013	0.000	0.022	299.695	0.899	0.5858541E-03	8.401880	0.1175005E-01	-0.1456631
07122011	09	0.000	0.002	0.003	0.000	0.001	0.000	0.000	0.000	0.013	0.000	0.028	301.188	0.841	0.000000	7.459092	0.1662163E-01	-0.3479877
07122011	10	0.000	0.007	0.008	0.000	0.000	0.000	0.000	0.000	0.012	0.000	0.027	302.854	0.766	0.4589558E-04	5.436473	0.1668650E-01	-0.4870480
07122011	11	0.000	0.008	0.010	0.000	0.000	0.000	0.000	0.000	0.010	0.000	0.024	304.524	0.709	0.1466274E-04	4.016825	0.1515468E-01	-0.5766639
07122011	12	0.000	0.008	0.012	0.000	0.000	0.000	0.000	0.000	0.010	0.000	0.022	306.350	0.641	0.4351139E-05	2.955084	0.1275717E-01	-0.6351844
07122011	13	0.000	0.007	0.013	0.000	0.000	0.000	0.000	0.000	0.009	0.000	0.021	307.848	0.581	0.1609325E-05	2.457829	0.1255812E-01	-0.7083731
07122011	14	0.000	0.008	0.015	0.000	0.000	0.000	0.000	0.000	0.009	0.000	0.021	308.330	0.567	0.1311302E-05	2.399824	0.1252635E-01	-0.7176452
07122011	15	0.000	0.011	0.017	0.000	0.000	0.000	0.000	0.000	0.010	0.000	0.021	307.836	0.581	0.1549721E-05	2.377921	0.1152561E-01	-0.6854663
07122011	16	0.000	0.014	0.019	0.000	0.000	0.000	0.000	0.000	0.011	0.000	0.022	307.077	0.602	0.2264977E-05	2.579870	0.1160209E-01	-0.6529383
07122011	17	0.000	0.016	0.019	0.000	0.000	0.000	0.000	0.000	0.011	0.000	0.022	306.017	0.629	0.3874302E-05	2.795248	0.1171583E-01	-0.6223529
07122011	18	0.000	0.015	0.017	0.000	0.000	0.000	0.000	0.000	0.011	0.000	0.026	304.792	0.659	0.7808208E-05	3.758365	0.1605755E-01	-0.6306805
07122011	19	0.000	0.012	0.015	0.000	0.000	0.000	0.000	0.000	0.012	0.000	0.024	303.452	0.690	0.1239777E-04	3.612795	0.1311310E-01	-0.5598620
07122011	20	0.000	0.008	0.012	0.000	0.000	0.000	0.000	0.000	0.014	0.000	0.022	301.617	0.754	0.3695488E-04	3.750698	0.9440161E-02	-0.4008673
07122011	21	0.000	0.006	0.010	0.000	0.000	0.000	0.001	0.000	0.016	0.000	0.020	300.576	0.787	0.1055002E-03	3.608397	0.5459087E-02	-0.1798056
07122011	22	0.001	0.004	0.008	0.000	0.000	0.000	0.001	0.000	0.016	0.000	0.018	299.946	0.810	0.2069473E-03	3.307528	0.3722766E-02	-0.5136223E-01
07122011	23	0.001	0.003	0.007	0.000	0.000	0.000	0.001	0.000	0.016	0.000	0.016	299.467	0.839	0.4575253E-03	3.381013	0.3307449E-02	0.9553677E-02
07122011	24	0.001	0.002	0.005	0.000	0.000	0.000	0.000	0.000	0.015	0.000	0.015	298.976	0.879	0.7843375E-03	4.195877	0.3194231E-02	0.1184564
07132011	01	0.001	0.001	0.002	0.000	0.000	0.000	0.000	0.000	0.013	0.000	0.013	298.565	0.916	0.1694500E-02	5.326705	0.3054841E-02	0.2414700
07132011	02	0.001	0.001	0.001	0.000	0.000	0.000	0.000	0.000	0.011	0.000	0.012	298.361	0.920	0.1287878E-02	4.958677	0.3239258E-02	0.1849203
07132011	03	0.001	0.001	0.001	0.000	0.000	0.000	0.000	0.000	0.011	0.000	0.011	298.187	0.929	0.1954794E-02	5.138140	0.2604407E-02	0.2950971
07132011	04	0.001	0.001	0.001	0.000	0.000	0.000	0.000	0.000	0.013	0.000	0.011	297.943	0.951	0.5838394E-02	7.086942	0.2035697E-02	0.5417458
07132011	05	0.002	0.001	0.001	0.000	0.001	0.000	0.000	0.000	0.015	0.000	0.013	297.788	0.960	0.000000	10.54708	0.3467939E-02	0.4830610
07132011	06	0.002	0.002	0.001	0.000	0.002	0.000	0.001	0.000	0.018	0.000	0.014	297.734	0.955	0.3109235E-01	11.42236	0.3131142E-02	0.5620530
07132011	07	0.003	0.003	0.002	0.000	0.003	0.000	0.001	0.001	0.021	0.000	0.015	298.449	0.946	0.1212731	9.260659	0.2937340E-02	0.4986877
07132011	08	0.004	0.009	0.006	0.001	0.004	0.000	0.001	0.001	0.024	0.001	0.016	300.128	0.901	0.3691620E-01	4.933860	0.7476264E-04	1.819502
07132011	09	0.003	0.021	0.011	0.001	0.003	0.000	0.001	0.001	0.021	0.000	0.014	301.674	0.846	0.1807129E-01	2.935317	0.6195028E-04	1.675612
07132011	10	0.003	0.024	0.013	0.000	0.001	0.000	0.001	0.001	0.016	0.000	0.011	303.091	0.791	NaN	1.709612	0.9338556E-02	-0.7373822
07132011	11	0.002	0.015	0.014	0.000	0.001	0.000	0.000	0.000	0.014	0.000	0.010	304.401	0.744	0.000000	1.275128	0.2933598E-02	-0.3618470
07132011	12	0.001	0.010	0.016	0.000	0.001	0.000	0.000	0.000	0.013	0.000	0.012	305.676	0.684	0.000000	1.216151	0.1814139E-02	-0.1736828
07132011	13	0.000	0.007	0.017	0.000	0.000	0.000	0.000	0.000	0.012	0.000	0.014	306.449	0.650	0.4768372E-05	1.461170	0.2481195E-02	-0.2299602
07132011	14	0.000	0.005	0.016	0.000	0.000	0.000	0.000	0.000	0.012	0.000	0.014	306.545	0.650	0.4708767E-05	1.461170	0.2479128E-02	-0.2295982
07132011	15	0.000	0.004	0.014	0.000	0.000	0.000	0.000	0.000	0.012	0.000	0.014	305.793	0.667	0.6914139E-05	1.563543	0.2574743E-02	-0.2166240
07132011	16	0.000	0.002	0.011	0.000	0.000	0.000	0.000	0.000	0.010	0.000	0.013	303.467	0.728	0.1668930E-04	1.909384	0.3776940E-02	-0.2962469
07132011	17	0.000	0.001	0.009	0.000	0.000	0.000	0.000	0.000	0.011	0.000	0.013	302.841	0.771	0.4005432E-04	2.138397	0.3141971E-02	-0.1671139
07132011	18	0.001	0.001	0.009	0.000	0.000	0.000	0.000	0.000	0.012	0.000	0.013	301.649	0.801	0.1103878E-03	2.256944	0.2127353E-02	0.2568121E-01
07132011	19	0.001	0.002	0.010	0.000	0.000	0.000	0.000	0.000	0.014	0.000	0.012	300.809	0.836	0.4388690E-03	2.478874	0.1578825E-02	0.1959206
07132011	20	0.002	0.003	0.010	0.000	0.000	0.000	0.000	0.000	0.016	0.000	0.012	299.543	0.858	0.1246333E-02	2.702703	0.1369368E-02	0.2952781
07132011	21	0.002	0.005	0.009	0.000	0.000	0.000	0.001	0.001	0.017	0.000	0.011	298.731	0.889	0.2374244E-01	2.982434	0.2532783E-02	0.7097279E-01
07132011	22	0.002	0.007	0.007	0.000	0.000	0.000	0.001	0.001	0.019	0.000	0.011	298.230	0.906	NaN	3.939525	0.2724689E-02	0.1601270
07132011	23	0.004	0.008	0.006	0.000	0.000	0.000	0.001	0.001	0.018	0.000	0.011	297.941	0.909	NaN	4.104360	0.1743191E-02	0.3719004
07132011	24	0.006	0.007	0.007	0.000	0.001	0.000	0.001	0.001	0.018	0.000	0.010	297.709	0.916	NaN	5.295337	0.6146018E-03	0.9352998
07142011	01	0.006	0.008	0.007	0.000	0.001	0.000	0.001	0.001	0.017	0.000	0.010	297.589	0.912	NaN	4.577897	0.7865516E-03	0.7649388
07142011	02	0.007	0.008	0.008	0.000	0.001	0.000	0.002	0.001	0.016	0.000	0.010	297.462	0.916	NaN	5.489811	0.7459475E-03	0.8668491
07142011	03	0.007	0.009	0.008	0.000	0.001	0.000	0.002	0.001	0.016	0.000	0.010	297.357	0.919	NaN	5.493873	0.7423965E-03	0.8692427
07142011	04	0.006	0.009	0.007	0.000	0.001	0.000	0.002	0.001	0.016	0.000	0.010	297.249	0.925	NaN	5.968225	0.7185184E-03	0.9194073
07142011	05	0.006	0.008	0.006	0.000	0.001	0.000	0.002	0.001	0.015	0.000	0.010	297.180	0.920	NaN	4.879192	0.7104537E-03	0.8368121
07142011	06	0.006	0.008	0.006	0.000	0.001	0.000	0.002	0.001	0.015	0.000	0.011	297.081	0.932	NaN	5.609151	0.1201950E-02	0.6690106
07142011	07	0.006	0.007	0.006	0.000	0.002	0.000	0.003	0.001	0.015	0.000	0.011	297.940	0.907	NaN	4.652061	0.7288306E-03	0.8050188
07142011	08	0.007	0.013	0.012	0.001	0.002	0.000	0.003	0.001	0.017	0.000	0.012	299.884	0.855	0.1643455E-01	2.614383	0.5780182E-04	1.655428
07142011	09	0.016	0.071	0.025	0.000	0.002	0.000	0.003	0.001	0.027	0.001	0.017	301.466	0.810	NaN	4.500117	0.5779944E-02	-0.1086999
07142011	10	0.021	0.118	0.032	0.000	0.002	0.000	0.002	0.001	0.036	0.001	0.021	303.149	0.749	NaN	4.275550	0.7219356E-02	-0.2275065
07142011	11	0.007	0.120	0.041	0.000	0.001	0.000	0.001	0.001	0.046	0.001	0.025	304.661	0.692	NaN	3.077069	0.2953564E-01	-0.9822091
07142011	12	0.001	0.037	0.030	0.000	0.000	0.000	0.001	0.001	0.030	0.000	0.027	304.666	0.681	0.1149774E-03	2.575849	0.2725383E-02	-0.2450714E-01
07142011	13	0.000	0.005	0.015	0.000	0.000	0.000	0.000	0.000	0.016	0.000	0.020	305.646	0.651	0.6198883E-05	2.182968	0.4663686E-02	-0.3296819
07142011	14	0.000	0.002	0.009	0.000	0.000	0.000	0.000	0.000	0.011	0.000	0.015	305.746	0.652	0.4112720E-05	1.720861	0.4483444E-02	-0.4158658
07142011	15	0.000	0.001	0.008	0.000	0.000	0.000	0.000	0.000	0.009	0.000	0.012	305.004	0.675	0.5781651E-05	1.497715	0.3484825E-02	-0.3667519
07142011	16	0.000	0.001	0.007	0.000	0.000	0.000	0.000	0.000	0.007	0.000	0.010	303.906	0.712	0.7987022E-05	1.426849	0.3495422E-02	-0.3891217
07142011	17	0.000	0.002	0.006	0.000	0.000	0.000	0.000	0.000	0.006	0.000	0.009	302.994	0.749	0.1400709E-04	1.509817	0.3561447E-02	-0.3727021
07142011	18	0.000	0.004	0.007	0.000	0.000	0.000	0.000	0.000	0.006	0.000	0.009	302.169	0.795	0.3367662E-04	1.845956	0.3734376E-02	-0.3059967
07142011	19	0.000	0.005	0.009	0.000	0.000	0.000	0.000	0.000	0.007	0.000	0.010	300.974	0.852	0.1038909E-03	2.595208	0.4109002E-02	-0.1995641
07142011	20	0.001	0.007	0.010	0.000	0.000	0.000	0.000	0.000	0.008	0.000	0.010	300.034	0.896	0.4597902E-03	3.460484	0.2987259E-02	0.6386398E-01
07142011	21	0.001	0.007	0.012	0.000	0.000	0.000	0.000	0.000	0.009	0.000	0.010	299.486	0.918	0.9638667E-03	4.132231	0.2625456E-02	0.1969799
07142011	22	0.001	0.008	0.012	0.000	0.000	0.000	0.000	0.000	0.009	0.000	0.011	298.796	0.940	0.1755953E-02	6.140156	0.3749952E-02	0.2141537
07142011	23	0.001	0.010	0.011	0.000	0.000	0.000	0.000	0.001	0.011	0.000	0.012	298.214	0.960	0.5508840E-02	8.989952	0.3896859E-02	0.3630428
07142011	24	0.001	0.013	0.010	0.000	0.000	0.000	0.001	0.001	0.015	0.000	0.015	297.883	0.970	0.1556343E-01	15.57471	0.4447273E-02	0.5443262
07152011	01	0.002	0.015	0.010	0.000	0.001	0.000	0.001	0.002	0.019	0.000	0.018	297.703	0.971	0.2883869E-01	17.82277	0.4197596E-02	0.6279746
07152011	02	0.002	0.018	0.010	0.000	0.001	0.000	0.002	0.003	0.025	0.000	0.022	297.591	0.968	0.4684150E-01	21.23274	0.4384093E-02	0.6851263
07152011	03	0.002	0.019	0.010	0.000	0.001	0.001	0.002	0.004	0.031	0.000	0.027	297.527	0.963	0.4368991E-01	18.50642	0.4513403E-02	0.6128183
07152011	04	0.003	0.019	0.010	0.000	0.002	0.001	0.002	0.004	0.038	0.000	0.032	297.476	0.960	0.5675697E-01	22.64033	0.5115903E-02	0.6459605
07152011	05	0.003	0.017	0.009	0.000	0.002	0.001	0.003	0.004	0.046	0.000	0.036	297.441	0.956	0.7991230E-01	26.06594	0.5382904E-02	0.6850568
07152011	06	0.004	0.014	0.008	0.001	0.002	0.001	0.003	0.004	0.055	0.000	0.040	297.428	0.952	0.000000	23.30443	0.4995304E-02	0.6688766
07152011	07	0.005	0.011	0.007	0.001	0.003	0.001	0.003	0.004	0.063	0.000	0.042	298.255	0.935	0.000000	20.64353	0.4821673E-02	0.6315862
07152011	08	0.005	0.016	0.015	0.001	0.003	0.001	0.003	0.003	0.064	0.001	0.043	299.512	0.873	0.000000	10.16761	0.5420481E-02	0.2731811
07152011	09	0.001	0.016	0.024	0.000	0.001	0.000	0.001	0.001	0.035	0.000	0.034	300.119	0.844	0.9619594E-03	6.966652	0.6053954E-02	0.6098498E-01
07152011	10	0.001	0.005	0.016	0.000	0.001	0.000	0.001	0.001	0.022	0.000	0.026	301.467	0.811	0.2560616E-03	4.607758	0.4965430E-02	-0.3246719E-01
07152011	11	0.000	0.002	0.013	0.000	0.001	0.000	0.000	0.000	0.017	0.000	0.021	301.020	0.793	0.000000	3.773686	0.5737857E-02	-0.1819839
07152011	12	0.001	0.001	0.009	0.000	0.001	0.000	0.001	0.001	0.018	0.000	0.019	302.296	0.776	0.2171993E-03	2.784404	0.2890309E-02	-0.1621206E-01
07152011	13	0.001	0.001	0.010	0.000	0.000	0.000	0.000	0.001	0.015	0.000	0.017	303.165	0.741	0.5054474E-04	2.110818	0.2568736E-02	-0.8526854E-01
07152011	14	0.000	0.001	0.009	0.000	0.000	0.000	0.000	0.000	0.011	0.000	0.016	302.758	0.747	0.2616644E-04	2.654104	0.6023709E-02	-0.3559461
07152011	15	0.000	0.001	0.007	0.000	0.000	0.000	0.000	0.000	0.009	0.000	0.016	302.106	0.773	0.3236532E-04	3.048299	0.8074014E-02	-0.4230319
07152011	16	0.000	0.002	0.005	0.000	0.000	0.000	0.000	0.000	0.008	0.000	0.016	301.591	0.800	0.5078316E-04	3.533661	0.9189260E-02	-0.4150556
07152011	17	0.000	0.003	0.005	0.000	0.000	0.000	0.000	0.000	0.007	0.000	0.017	300.943	0.823	0.7200241E-04	4.244705	0.1132565E-01	-0.4262155
07152011	18	0.000	0.005	0.006	0.000	0.000	0.000	0.000	0.000	0.006	0.000	0.017	300.144	0.859	0.1428127E-03	5.299746	0.1248475E-01	-0.3721249
07152011	19	0.000	0.006	0.005	0.000	0.000	0.000	0.000	0.000	0.006	0.000	0.019	299.771	0.879	0.2304912E-03	6.773040	0.1474158E-01	-0.3377604
07152011	20	0.000	0.003	0.003	0.000	0.000	0.000	0.000	0.000	0.006	0.000	0.017	298.807	0.909	0.4819632E-03	7.588077	0.1287559E-01	-0.2296355
07152011	21	0.000	0.004	0.003	0.000	0.000	0.000	0.000	0.000	0.006	0.000	0.014	298.226	0.945	0.1485288E-02	10.24658	0.9977281E-02	0.1156678E-01
07152011	22	0.000	0.007	0.003	0.000	0.000	0.000	0.000	0.000	0.007	0.000	0.014	297.970	0.958	0.2578199E-02	12.46847	0.9285755E-02	0.1279961
07152011	23	0.000	0.009	0.002	0.000	0.000	0.000	0.000	0.000	0.008	0.000	0.015	297.822	0.960	0.2929628E-02	13.28815	0.9544696E-02	0.1437023
07152011	24	0.000	0.007	0.001	0.000	0.001	0.000	0.001	0.000	0.008	0.000	0.013	297.680	0.967	0.6404042E-02	14.93774	0.6532709E-02	0.3591916
07162011	01	0.001	0.005	0.001	0.000	0.001	0.000	0.001	0.000	0.007	0.000	0.009	297.578	0.970	0.8488655E-02	10.04500	0.3199549E-02	0.4968611
07162011	02	0.001	0.003	0.001	0.000	0.001	0.000	0.001	0.000	0.005	0.000	0.004	297.689	0.958	0.6180716E-01	3.357843	0.1330122E-02	0.4021688
07162011	03	0.002	0.001	0.001	0.000	0.001	0.000	0.001	0.000	0.004	0.000	0.003	297.465	0.966	NaN	3.668566	0.2255362E-03	1.211280
07162011	04	0.003	0.001	0.001	0.000	0.001	0.000	0.001	0.000	0.003	0.000	0.003	297.345	0.966	NaN	3.674865	0.2239089E-03	1.215170
07162011	05	0.003	0.001	0.001	0.000	0.001	0.000	0.001	0.000	0.003	0.000	0.003	297.188	0.969	NaN	3.683058	0.2217917E-03	1.220263
07162011	06	0.002	0.002	0.002	0.000	0.001	0.000	0.001	0.000	0.004	0.000	0.003	297.082	0.960	NaN	3.099899	0.3889505E-03	0.9014532
07162011	07	0.001	0.003	0.003	0.000	0.001	0.000	0.001	0.000	0.005	0.000	0.004	297.753	0.931	0.2281678E-01	1.861836	0.1320962E-02	0.1490511
07162011	08	0.001	0.002	0.004	0.000	0.000	0.000	0.000	0.000	0.005	0.000	0.004	298.688	0.906	0.1194000E-02	1.388889	0.4639944E-03	0.4761547
07162011	09	0.001	0.001	0.005	0.000	0.000	0.000	0.000	0.000	0.004	0.000	0.004	299.594	0.882	0.3079772E-03	1.088532	0.6074946E-03	0.2532988
07162011	10	0.001	0.000	0.004	0.000	0.000	0.000	0.000	0.000	0.003	0.000	0.003	299.786	0.864	0.1989007E-03	0.6949492	0.3969742E-03	0.2431908
07162011	11	0.001	0.001	0.004	0.000	0.000	0.000	0.000	0.000	0.003	0.000	0.003	301.227	0.822	0.1006126E-03	0.5444204	0.3495806E-03	0.1923871
07162011	12	0.001	0.002	0.003	0.000	0.000	0.000	0.000	0.000	0.003	0.000	0.003	301.841	0.809	0.8565187E-04	0.5169299	0.3321955E-03	0.1920379
07162011	13	0.000	0.003	0.003	0.000	0.000	0.000	0.000	0.000	0.003	0.000	0.005	301.870	0.810	0.2050400E-04	1.104548	0.2406048E-02	-0.3381195
07162011	14	0.000	0.003	0.003	0.000	0.000	0.000	0.000	0.000	0.004	0.000	0.007	302.317	0.810	0.2664328E-04	1.565582	0.3545173E-02	-0.3549618
07162011	15	0.000	0.002	0.003	0.000	0.000	0.000	0.000	0.000	0.005	0.000	0.009	302.002	0.824	0.4070997E-04	2.120959	0.4729231E-02	-0.3482583
07162011	16	0.000	0.003	0.004	0.000	0.000	0.000	0.000	0.000	0.005	0.000	0.010	301.610	0.839	0.6115437E-04	2.654873	0.5848567E-02	-0.3430057
07162011	17	0.000	0.002	0.005	0.000	0.000	0.000	0.000	0.000	0.005	0.000	0.009	301.072	0.858	0.8893013E-04	2.616222	0.4879046E-02	-0.2706603
07162011	18	0.001	0.001	0.005	0.000	0.000	0.000	0.000	0.000	0.005	0.000	0.007	300.447	0.877	0.1857877E-03	2.085540	0.2167398E-02	-0.1672004E-01
07162011	19	0.001	0.000	0.004	0.000	0.000	0.000	0.000	0.000	0.004	0.000	0.004	299.681	0.896	0.4550815E-03	1.293896	0.6319485E-03	0.3112179
07162011	20	0.001	0.000	0.003	0.000	0.000	0.000	0.000	0.000	0.004	0.000	0.003	298.834	0.905	0.1619101E-02	1.058081	0.2471209E-03	0.6316093
07162011	21	0.001	0.000	0.003	0.000	0.000	0.000	0.000	0.000	0.004	0.000	0.004	298.221	0.917	0.8033514E-03	1.607696	0.6994231E-03	0.3614641
07162011	22	0.001	0.000	0.003	0.000	0.000	0.000	0.000	0.000	0.004	0.000	0.004	297.730	0.915	0.8283257E-03	1.607696	0.7063406E-03	0.3571898
07162011	23	0.001	0.000	0.003	0.000	0.000	0.000	0.000	0.000	0.005	0.000	0.004	297.064	0.930	0.2137184E-02	1.785714	0.4749665E-03	0.5751490
07162011	24	0.001	0.000	0.003	0.000	0.000	0.000	0.000	0.000	0.006	0.000	0.005	296.489	0.943	0.2885997E-02	2.651711	0.7468222E-03	0.5503090
07172011	01	0.001	0.000	0.004	0.000	0.000	0.000	0.000	0.000	0.007	0.000	0.005	296.048	0.928	0.3912866E-02	2.253004	0.5104295E-03	0.6448262
07172011	02	0.001	0.001	0.004	0.000	0.000	0.000	0.000	0.000	0.008	0.000	0.006	295.572	0.932	0.3513098E-02	2.678571	0.7619864E-03	0.5459560
07172011	03	0.002	0.001	0.003	0.000	0.001	0.000	0.000	0.000	0.009	0.000	0.006	295.509	0.931	0.2127886E-04	2.804835	0.1591573E-02	0.2460806
07172011	04	0.002	0.001	0.003	0.000	0.001	0.000	0.001	0.000	0.011	0.000	0.007	295.503	0.934	NaN	3.293708	0.1173356E-02	0.4482554
07172011	05	0.002	0.001	0.003	0.000	0.001	0.000	0.001	0.000	0.012	0.000	0.007	295.635	0.925	NaN	3.534395	0.8349859E-03	0.6266359
07172011	06	0.002	0.002	0.004	0.000	0.001	0.000	0.001	0.000	0.013	0.000	0.008	295.670	0.932	NaN	3.799198	0.1605444E-02	0.3740967
07172011	07	0.002	0.002	0.005	0.000	0.001	0.000	0.000	0.000	0.011	0.000	0.007	296.276	0.929	0.2145767E-04	3.272125	0.1814179E-02	0.2561498
07172011	08	0.001	0.000	0.007	0.000	0.000	0.000	0.000	0.000	0.010	0.000	0.008	297.507	0.891	0.1171708E-02	2.325907	0.1139492E-02	0.3098809
07172011	09	0.001	0.000	0.008	0.000	0.000	0.000	0.000	0.000	0.009	0.000	0.008	297.751	0.866	0.5769134E-03	2.017994	0.1286598E-02	0.1954770
07172011	10	0.001	0.000	0.008	0.000	0.000	0.000	0.000	0.000	0.010	0.000	0.009	299.769	0.797	0.1844764E-03	1.502976	0.1149322E-02	0.1165102
07172011	11	0.001	0.000	0.009	0.000	0.000	0.000	0.000	0.000	0.010	0.000	0.009	300.103	0.765	0.1235008E-03	1.301330	0.1025515E-02	0.1034453
07172011	12	0.001	0.001	0.009	0.000	0.000	0.000	0.000	0.000	0.010	0.000	0.009	301.623	0.716	0.6425381E-04	1.048297	0.7638602E-03	0.1374705
07172011	13	0.001	0.001	0.012	0.000	0.000	0.000	0.000	0.000	0.009	0.000	0.008	302.406	0.686	0.4351139E-04	0.8219600	0.5796971E-03	0.1516495
07172011	14	0.001	0.001	0.012	0.000	0.000	0.000	0.000	0.000	0.008	0.000	0.008	302.666	0.678	0.2419949E-04	0.8094420	0.5004085E-03	0.2088611
07172011	15	0.001	0.001	0.011	0.000	0.000	0.000	0.000	0.000	0.008	0.000	0.007	302.252	0.686	0.4255772E-04	0.7143173	0.5430134E-03	0.1190806
07172011	16	0.001	0.001	0.009	0.000	0.000	0.000	0.000	0.000	0.008	0.000	0.007	301.019	0.707	0.5537271E-04	0.7742788	0.6422865E-03	0.8116859E-01
07172011	17	0.002	0.001	0.007	0.000	0.000	0.000	0.000	0.000	0.010	0.000	0.007	301.437	0.708	0.2824068E-03	0.7865102	0.7008685E-03	0.5006784E-01
07172011	18	0.002	0.001	0.007	0.000	0.001	0.000	0.000	0.000	0.010	0.000	0.007	300.549	0.725	0.000000	0.8945295	0.2159645E-02	-0.3827878
07172011	19	0.002	0.002	0.007	0.001	0.001	0.000	0.001	0.001	0.011	0.000	0.008	299.549	0.752	0.2980232E-04	1.258851	0.2297029E-02	-0.2611922
07172011	20	0.002	0.002	0.006	0.001	0.001	0.000	0.001	0.001	0.013	0.000	0.010	298.525	0.774	0.000000	1.334516	0.2184913E-02	-0.2141103
07172011	21	0.002	0.001	0.004	0.001	0.001	0.000	0.001	0.001	0.015	0.000	0.011	297.966	0.795	0.000000	1.694641	0.2317636E-02	-0.1359674
07172011	22	0.002	0.002	0.004	0.001	0.001	0.000	0.001	0.001	0.018	0.000	0.013	297.563	0.818	0.000000	2.220259	0.2591790E-02	-0.6719609E-01
07172011	23	0.002	0.002	0.004	0.001	0.001	0.000	0.001	0.001	0.020	0.000	0.015	297.234	0.839	0.000000	2.849090	0.2893004E-02	-0.6642943E-02
07172011	24	0.002	0.002	0.004	0.001	0.001	0.000	0.001	0.001	0.022	0.000	0.016	296.890	0.870	0.000000	3.731173	0.2993761E-02	0.9562818E-01
07182011	01	0.002	0.003	0.004	0.001	0.001	0.000	0.001	0.001	0.023	0.000	0.017	296.674	0.886	0.000000	4.650498	0.3142915E-02	0.1701668
07182011	02	0.002	0.004	0.004	0.001	0.001	0.000	0.001	0.001	0.024	0.000	0.018	296.426	0.908	0.000000	5.979012	0.3304930E-02	0.2574671
07182011	03	0.003	0.004	0.004	0.001	0.001	0.001	0.001	0.002	0.025	0.000	0.018	296.288	0.910	0.000000	5.791177	0.2706109E-02	0.3304215
07182011	04	0.003	0.005	0.005	0.001	0.002	0.001	0.002	0.002	0.026	0.000	0.019	296.215	0.899	0.000000	6.214554	0.2880020E-02	0.3340144
07182011	05	0.003	0.006	0.005	0.001	0.002	0.001	0.002	0.002	0.027	0.000	0.019	296.067	0.900	0.000000	6.870292	0.3037968E-02	0.3543920
07182011	06	0.004	0.008	0.006	0.001	0.003	0.001	0.002	0.003	0.027	0.001	0.019	295.961	0.898	0.4783207E-01	5.237659	0.1056304E-03	1.695348
07182011	07	0.005	0.012	0.008	0.001	0.003	0.001	0.003	0.003	0.025	0.001	0.019	296.407	0.884	0.3644133E-01	4.414407	0.1040388E-03	1.627677
07182011	08	0.004	0.027	0.018	0.001	0.003	0.001	0.002	0.003	0.023	0.001	0.017	297.777	0.841	0.1716715E-01	3.004560	0.1082151E-03	1.443493
07182011	09	0.003	0.036	0.021	0.000	0.003	0.000	0.002	0.001	0.017	0.001	0.012	299.494	0.775	NaN	2.008688	0.1644437E-01	-0.9131048
07182011	10	0.003	0.023	0.016	0.000	0.002	0.000	0.001	0.001	0.013	0.000	0.009	301.044	0.714	NaN	1.158737	0.1149275E-01	-0.9964390
07182011	11	0.002	0.013	0.013	0.000	0.001	0.000	0.001	0.001	0.013	0.000	0.009	302.559	0.657	NaN	0.8624018	0.1081281E-01	-1.098229
07182011	12	0.001	0.008	0.012	0.000	0.001	0.000	0.001	0.001	0.013	0.000	0.011	303.816	0.612	0.7450581E-04	0.7533429	0.2418266E-02	-0.5065114
07182011	13	0.001	0.005	0.012	0.000	0.001	0.000	0.001	0.000	0.015	0.000	0.013	304.995	0.571	0.3147125E-04	0.8503604	0.1667998E-02	-0.2925926
07182011	14	0.001	0.004	0.011	0.000	0.001	0.000	0.001	0.000	0.018	0.000	0.017	305.795	0.534	0.1746416E-04	0.9846008	0.1160744E-02	-0.7147636E-01
07182011	15	0.001	0.004	0.012	0.000	0.001	0.000	0.000	0.000	0.021	0.000	0.020	305.555	0.528	0.000000	1.185466	0.1072053E-02	0.4367274E-01
07182011	16	0.001	0.004	0.012	0.000	0.001	0.000	0.000	0.001	0.023	0.000	0.022	305.372	0.533	0.1668930E-04	1.234004	0.1226807E-02	0.2540618E-02
07182011	17	0.001	0.004	0.011	0.000	0.001	0.000	0.001	0.001	0.025	0.000	0.023	304.872	0.544	0.2831221E-04	1.306647	0.1560591E-02	-0.7713071E-01
07182011	18	0.001	0.003	0.010	0.000	0.001	0.000	0.001	0.001	0.027	0.000	0.026	304.269	0.548	0.2759695E-04	1.558566	0.1415699E-02	0.4175451E-01
07182011	19	0.001	0.003	0.010	0.000	0.001	0.000	0.001	0.001	0.028	0.000	0.023	303.561	0.545	0.4482269E-04	1.319368	0.2512680E-02	-0.2797714
07182011	20	0.003	0.003	0.009	0.000	0.001	0.000	0.001	0.002	0.031	0.000	0.022	301.938	0.591	0.5193949E-03	1.533868	0.4423831E-02	-0.4600106
07182011	21	0.005	0.004	0.008	0.000	0.001	0.001	0.002	0.003	0.034	0.000	0.022	300.650	0.621	NaN	1.919408	0.2277125E-02	-0.7421942E-01
07182011	22	0.011	0.005	0.008	0.000	0.001	0.001	0.002	0.003	0.032	0.000	0.021	299.623	0.664	NaN	2.195415	0.7052516E-03	0.4931726
07182011	23	0.015	0.006	0.009	0.000	0.001	0.001	0.002	0.004	0.030	0.000	0.021	298.792	0.714	NaN	2.582611	0.3876854E-03	0.8235795
07182011	24	0.018	0.007	0.010	0.000	0.002	0.001	0.003	0.005	0.029	0.000	0.022	298.043	0.773	NaN	3.377725	0.2591017E-03	1.115154
07192011	01	0.018	0.008	0.011	0.000	0.002	0.001	0.003	0.005	0.028	0.001	0.022	297.354	0.838	NaN	5.085974	0.3262697E-03	1.192797
07192011	02	0.015	0.009	0.012	0.000	0.002	0.001	0.003	0.006	0.030	0.001	0.024	296.859	0.882	NaN	7.127963	0.5844528E-03	1.086216
07192011	03	0.013	0.011	0.012	0.000	0.002	0.001	0.003	0.006	0.033	0.001	0.025	296.578	0.899	NaN	8.837413	0.6988096E-03	1.101966
07192011	04	0.011	0.012	0.013	0.000	0.002	0.001	0.004	0.006	0.035	0.001	0.027	296.373	0.906	NaN	10.27888	0.1420717E-02	0.8594382
07192011	05	0.010	0.013	0.013	0.000	0.002	0.001	0.004	0.006	0.037	0.001	0.028	296.207	0.911	NaN	10.44701	0.1704251E-02	0.7874584
07192011	06	0.010	0.014	0.013	0.000	0.002	0.001	0.004	0.007	0.037	0.001	0.028	296.074	0.918	NaN	11.80093	0.1167006E-02	1.004843
07192011	07	0.012	0.015	0.013	0.000	0.002	0.001	0.004	0.007	0.037	0.001	0.028	296.757	0.924	NaN	12.06784	0.8533843E-03	1.150485
07192011	08	0.009	0.013	0.014	0.000	0.002	0.001	0.004	0.007	0.037	0.001	0.029	299.118	0.838	NaN	5.774681	0.2730550E-02	0.3252778
07192011	09	0.002	0.043	0.028	0.000	0.002	0.001	0.003	0.005	0.041	0.000	0.035	300.990	0.767	0.1915872E-02	4.306206	0.4993919E-02	-0.6434675E-01
07192011	10	0.001	0.137	0.036	0.000	0.002	0.001	0.002	0.003	0.038	0.000	0.040	302.824	0.678	0.1931190E-03	3.822996	0.3277668E-02	0.6683892E-01
07192011	11	0.000	0.265	0.047	0.000	0.001	0.000	0.001	0.002	0.034	0.000	0.045	304.104	0.620	0.9894371E-05	4.148831	0.8452574E-02	-0.3090633
07192011	12	0.000	0.225	0.041	0.000	0.001	0.000	0.001	0.002	0.032	0.000	0.045	305.167	0.576	0.4172325E-05	3.805273	0.9997804E-02	-0.4195188
07192011	13	0.000	0.161	0.034	0.000	0.001	0.000	0.001	0.001	0.031	0.000	0.045	306.473	0.536	0.1907349E-05	3.588413	0.1173805E-01	-0.5146934
07192011	14	0.000	0.100	0.026	0.000	0.001	0.000	0.001	0.001	0.023	0.000	0.045	307.162	0.520	0.1370907E-05	3.999774	0.1980674E-01	-0.6947776
07192011	15	0.000	0.054	0.021	0.000	0.000	0.000	0.000	0.001	0.017	0.000	0.052	306.993	0.534	0.2324581E-05	5.674625	0.3544445E-01	-0.7956111
07192011	16	0.000	0.033	0.019	0.000	0.000	0.000	0.000	0.001	0.015	0.000	0.057	306.496	0.561	0.4112720E-05	6.954657	0.4289861E-01	-0.7901675
07192011	17	0.000	0.029	0.017	0.000	0.000	0.000	0.000	0.001	0.015	0.000	0.057	305.752	0.591	0.6437302E-05	7.447228	0.4310692E-01	-0.7625524
07192011	18	0.000	0.026	0.013	0.000	0.000	0.000	0.000	0.001	0.016	0.000	0.055	304.880	0.624	0.9536743E-05	7.582610	0.4021683E-01	-0.7245890
07192011	19	0.000	0.025	0.010	0.000	0.000	0.000	0.001	0.001	0.017	0.000	0.052	303.909	0.658	0.1639128E-04	7.685766	0.3527129E-01	-0.6617342
07192011	20	0.000	0.020	0.007	0.000	0.000	0.000	0.001	0.001	0.021	0.000	0.051	302.283	0.718	0.4297495E-04	8.543836	0.3078892E-01	-0.5567415
07192011	21	0.000	0.015	0.005	0.000	0.000	0.000	0.001	0.002	0.025	0.000	0.051	301.056	0.760	0.9053946E-04	9.159049	0.2635972E-01	-0.4590904
07192011	22	0.000	0.013	0.004	0.001	0.000	0.000	0.001	0.002	0.028	0.000	0.051	300.184	0.792	0.000000	9.996013	0.2404675E-01	-0.3812295
07192011	23	0.000	0.011	0.004	0.001	0.001	0.000	0.001	0.002	0.030	0.000	0.050	299.487	0.822	0.000000	10.83888	0.2098193E-01	-0.2868612
07192011	24	0.000	0.010	0.003	0.001	0.001	0.000	0.001	0.002	0.031	0.000	0.048	298.927	0.851	0.000000	11.90866	0.1908074E-01	-0.2047323
07202011	01	0.000	0.009	0.003	0.001	0.001	0.000	0.001	0.002	0.030	0.000	0.045	298.484	0.876	0.000000	13.39450	0.1770026E-01	-0.1210530
07202011	02	0.000	0.007	0.002	0.001	0.001	0.000	0.001	0.002	0.030	0.000	0.042	298.084	0.899	0.000000	14.36697	0.1542724E-01	-0.3092295E-01
07202011	03	0.001	0.005	0.002	0.001	0.001	0.000	0.001	0.002	0.030	0.000	0.039	297.833	0.909	0.000000	14.23591	0.1249278E-01	0.5672621E-01
07202011	04	0.001	0.004	0.002	0.001	0.002	0.000	0.001	0.002	0.030	0.000	0.035	297.641	0.915	0.000000	13.65837	0.9252219E-02	0.1691529
07202011	05	0.001	0.003	0.002	0.001	0.002	0.000	0.001	0.002	0.032	0.000	0.033	297.493	0.919	0.000000	12.64139	0.7374033E-02	0.2340896
07202011	06	0.002	0.003	0.001	0.001	0.003	0.000	0.001	0.002	0.034	0.000	0.031	297.393	0.923	0.000000	11.56722	0.5684917E-02	0.3085047
07202011	07	0.002	0.003	0.001	0.001	0.004	0.001	0.002	0.003	0.038	0.000	0.031	298.153	0.909	0.000000	9.895846	0.4474627E-02	0.3446961
07202011	08	0.003	0.006	0.003	0.001	0.004	0.001	0.002	0.003	0.041	0.000	0.032	299.953	0.861	0.000000	6.808247	0.4700826E-02	0.1608612
07202011	09	0.004	0.016	0.010	0.001	0.003	0.001	0.001	0.003	0.046	0.000	0.031	301.229	0.827	0.2077818E-03	5.646111	0.4678553E-02	0.8163787E-01
07202011	10	0.003	0.020	0.013	0.000	0.001	0.000	0.001	0.002	0.042	0.000	0.029	302.389	0.793	0.2656937E-02	4.251089	0.5206307E-02	-0.8802962E-01
07202011	11	0.001	0.019	0.014	0.000	0.001	0.000	0.001	0.001	0.033	0.000	0.028	303.502	0.760	0.3966689E-03	3.688913	0.4088752E-02	-0.4469236E-01
07202011	12	0.001	0.007	0.013	0.000	0.000	0.000	0.000	0.001	0.024	0.000	0.027	303.004	0.774	0.1122355E-03	4.001529	0.4833343E-02	-0.8202157E-01
07202011	13	0.000	0.002	0.010	0.000	0.000	0.000	0.000	0.001	0.017	0.000	0.025	303.939	0.747	0.3671646E-04	3.936131	0.8789157E-02	-0.3488777
07202011	14	0.000	0.001	0.009	0.000	0.000	0.000	0.000	0.000	0.014	0.000	0.023	304.619	0.723	0.1817942E-04	3.581874	0.1012764E-01	-0.4513980
07202011	15	0.000	0.000	0.008	0.000	0.000	0.000	0.000	0.000	0.012	0.000	0.020	304.595	0.715	0.1573563E-04	3.129951	0.8980370E-02	-0.4577568
07202011	16	0.000	0.000	0.006	0.000	0.000	0.000	0.000	0.000	0.009	0.000	0.016	302.969	0.739	0.1901388E-04	2.736008	0.7917078E-02	-0.4614476
07202011	17	0.000	0.000	0.005	0.000	0.000	0.000	0.000	0.000	0.009	0.000	0.015	303.126	0.769	0.2902746E-04	2.806168	0.6977997E-02	-0.3956172
07202011	18	0.000	0.000	0.004	0.000	0.000	0.000	0.000	0.000	0.008	0.000	0.015	302.067	0.794	0.4047155E-04	3.135786	0.8072422E-02	-0.4106575
07202011	19	0.000	0.001	0.003	0.000	0.000	0.000	0.000	0.000	0.008	0.000	0.014	301.458	0.817	0.6783009E-04	3.277592	0.7176005E-02	-0.3403279
07202011	20	0.000	0.001	0.003	0.000	0.000	0.000	0.000	0.000	0.009	0.000	0.015	300.310	0.840	0.1175404E-03	3.832400	0.7463600E-02	-0.2894776
07202011	21	0.001	0.001	0.002	0.000	0.000	0.000	0.000	0.000	0.012	0.000	0.015	299.562	0.861	0.2954006E-03	3.875348	0.4421812E-02	-0.5728956E-01
07202011	22	0.001	0.001	0.002	0.000	0.000	0.000	0.000	0.000	0.014	0.000	0.014	299.100	0.870	0.5716681E-03	3.626798	0.2771417E-02	0.1168215
07202011	23	0.001	0.001	0.002	0.000	0.000	0.000	0.000	0.000	0.015	0.000	0.014	298.874	0.876	0.8991361E-03	3.871979	0.2625885E-02	0.1686572
07202011	24	0.001	0.001	0.002	0.000	0.000	0.000	0.000	0.000	0.015	0.000	0.014	298.694	0.885	0.1092851E-02	4.200961	0.2695533E-02	0.1927040
