# Supplementary material for: Understanding nitrate formation in a world with less sulfate
Source: Copernicus journal article supplement (doi:10.5194/acp-18-12765-2018), 2018-09-05
Supplement: Supplementary file 2 [file acp-18-12765-2018-supplement.zip › DATA/RAW DATA FOR DIURNALS/data_extract_SOAS_mod2011.csv]

Date	Hour	NH3	SO2	HNO3	CL	NA	MG	K	CA	NH4	NO3	SO4	T	RH	e_NO3	Water	H+	pH
06022011	01	0.053	0.021	0.004	0.004	0.003	0.002	0.005	0.011	0.010	0.001	0.022	297.431	0.808	0.4299980E-01	2.081138	0.1424992E-04	2.164489
06022011	02	0.062	0.021	0.003	0.004	0.003	0.002	0.006	0.012	0.008	0.001	0.022	297.023	0.840	0.7462674E-01	2.211474	0.7238186E-05	2.485052
06022011	03	0.068	0.022	0.003	0.003	0.003	0.002	0.006	0.013	0.005	0.002	0.021	296.787	0.852	0.1168972	1.941403	0.2788293E-05	2.842777
06022011	04	0.068	0.023	0.003	0.003	0.004	0.002	0.007	0.013	0.004	0.002	0.021	296.615	0.858	0.2037814	2.168948	0.1590594E-05	3.134690
06022011	05	0.064	0.022	0.002	0.004	0.004	0.002	0.007	0.013	0.002	0.002	0.020	296.459	0.865	0.2455186	2.101830	0.1084987E-05	3.287173
06022011	06	0.062	0.020	0.002	0.004	0.004	0.002	0.007	0.013	0.002	0.002	0.020	296.365	0.868	0.2442489	2.100075	0.1106561E-05	3.278260
06022011	07	0.061	0.019	0.004	0.003	0.004	0.002	0.008	0.013	0.002	0.002	0.019	297.201	0.871	0.1776450	1.745238	0.1085372E-05	3.206276
06022011	08	0.054	0.017	0.007	0.003	0.004	0.002	0.008	0.013	0.002	0.002	0.019	300.374	0.780	0.6812066E-01	0.9875229	0.7764851E-06	3.104414
06022011	09	0.069	0.038	0.012	0.001	0.003	0.001	0.006	0.008	0.013	0.002	0.020	302.310	0.694	0.8949578E-02	1.384278	0.2409483E-04	1.759299
06022011	10	0.052	0.042	0.021	0.001	0.002	0.001	0.003	0.004	0.028	0.001	0.021	304.306	0.603	0.6733716E-02	1.496283	0.5102584E-04	1.467224
06022011	11	0.032	0.026	0.019	0.000	0.002	0.001	0.002	0.003	0.027	0.001	0.019	306.134	0.529	NaN	1.665351	0.2168517E-03	0.8853428
06022011	12	0.026	0.021	0.018	0.000	0.002	0.000	0.002	0.002	0.028	0.001	0.019	307.836	0.468	NaN	1.320540	0.5895966E-03	0.3501966
06022011	13	0.023	0.022	0.018	0.000	0.001	0.000	0.002	0.002	0.030	0.001	0.020	310.087	0.395	NaN	1.030906	0.1071479E-02	-0.1676462E-01
06022011	14	0.010	0.012	0.015	0.000	0.001	0.000	0.002	0.002	0.038	0.001	0.022	307.468	0.440	NaN	1.200169	0.3824468E-02	-0.5033287
06022011	15	0.006	0.003	0.009	0.000	0.001	0.000	0.001	0.001	0.040	0.001	0.025	305.300	0.530	0.1167077E-01	1.679000	0.5307206E-02	-0.4998154
06022011	16	0.006	0.002	0.005	0.001	0.001	0.000	0.001	0.001	0.050	0.000	0.027	306.182	0.528	0.1651210E-01	1.819252	0.3581542E-04	1.705823
06022011	17	0.010	0.003	0.007	0.001	0.001	0.000	0.001	0.001	0.057	0.001	0.031	306.981	0.471	0.1235485E-01	1.766681	0.4314666E-04	1.612211
06022011	18	0.008	0.006	0.008	0.001	0.001	0.000	0.001	0.002	0.064	0.001	0.035	306.139	0.519	0.1542532E-01	2.245487	0.6055686E-04	1.569147
06022011	19	0.006	0.007	0.008	0.001	0.001	0.000	0.002	0.002	0.072	0.001	0.039	304.488	0.557	0.2090812E-01	2.800749	0.8471958E-04	1.519290
06022011	20	0.006	0.009	0.008	0.002	0.001	0.000	0.002	0.002	0.082	0.001	0.045	302.434	0.567	0.2799904E-01	3.355111	0.1285005E-03	1.416802
06022011	21	0.007	0.011	0.009	0.002	0.002	0.000	0.003	0.002	0.089	0.001	0.049	301.150	0.574	0.3128713E-01	3.666028	0.1682172E-03	1.338325
06022011	22	0.011	0.012	0.010	0.002	0.002	0.000	0.003	0.002	0.093	0.001	0.051	300.233	0.601	0.3526425E-01	4.172989	0.2088703E-03	1.300570
06022011	23	0.017	0.013	0.011	0.001	0.002	0.000	0.004	0.002	0.093	0.001	0.051	299.397	0.645	0.3991061E-01	4.835943	0.2409708E-03	1.302517
06022011	24	0.024	0.013	0.011	0.001	0.002	0.000	0.004	0.002	0.090	0.001	0.050	298.592	0.705	0.4867381E-01	5.771256	0.2816123E-03	1.311619
06032011	01	0.030	0.012	0.010	0.001	0.002	0.000	0.004	0.002	0.086	0.001	0.048	297.763	0.785	0.6160927E-01	7.529776	0.2805078E-03	1.428837
06032011	02	0.032	0.010	0.008	0.001	0.002	0.001	0.004	0.002	0.080	0.001	0.045	297.198	0.838	0.8028054E-01	9.093947	0.2409887E-03	1.576756
06032011	03	0.031	0.008	0.006	0.001	0.002	0.001	0.004	0.002	0.073	0.001	0.042	296.937	0.852	0.8587950E-01	8.957200	0.2176840E-03	1.614346
06032011	04	0.031	0.007	0.004	0.001	0.002	0.001	0.004	0.003	0.065	0.001	0.038	296.834	0.846	0.8821023E-01	7.838632	0.1615692E-03	1.685882
06032011	05	0.030	0.005	0.003	0.001	0.002	0.001	0.004	0.003	0.058	0.001	0.035	296.759	0.835	0.8605069E-01	6.765819	0.1307248E-03	1.713962
06032011	06	0.025	0.004	0.002	0.002	0.003	0.001	0.003	0.002	0.052	0.001	0.032	296.574	0.853	0.9163404E-01	6.744350	0.1190767E-03	1.753113
06032011	07	0.025	0.004	0.002	0.002	0.003	0.001	0.003	0.002	0.049	0.001	0.030	297.472	0.852	0.8145618E-01	6.296922	0.1004505E-03	1.797176
06032011	08	0.017	0.006	0.003	0.001	0.003	0.001	0.003	0.003	0.045	0.001	0.028	300.215	0.747	0.4222286E-01	3.554420	0.6598649E-04	1.731314
06032011	09	0.009	0.023	0.009	0.001	0.003	0.000	0.002	0.002	0.029	0.001	0.020	302.540	0.659	0.1374984E-01	1.865946	0.5864670E-04	1.502656
06032011	10	0.007	0.030	0.015	0.001	0.002	0.000	0.001	0.002	0.022	0.001	0.015	304.637	0.580	0.5794168E-02	1.066833	0.4034480E-04	1.422309
06032011	11	0.007	0.036	0.017	0.000	0.001	0.000	0.001	0.002	0.024	0.001	0.016	307.051	0.489	NaN	0.9682377	0.1068703E-01	-1.042875
06032011	12	0.004	0.045	0.020	0.000	0.001	0.000	0.001	0.002	0.031	0.001	0.020	309.253	0.416	0.3819585E-02	1.013140	0.5714984E-02	-0.7513456
06032011	13	0.002	0.025	0.017	0.000	0.001	0.000	0.001	0.002	0.032	0.000	0.024	306.985	0.483	0.5275011E-04	1.079839	0.4287657E-02	-0.5988611
06032011	14	0.002	0.011	0.012	0.000	0.001	0.000	0.001	0.001	0.035	0.000	0.026	307.331	0.450	0.2878904E-04	1.046954	0.3590595E-02	-0.5352386
06032011	15	0.002	0.006	0.010	0.000	0.001	0.000	0.001	0.001	0.039	0.000	0.027	308.784	0.408	0.3528595E-04	1.009459	0.4569127E-02	-0.6557447
06032011	16	0.004	0.003	0.008	0.001	0.001	0.000	0.001	0.001	0.038	0.000	0.025	306.083	0.503	0.000000	1.413001	0.5438319E-02	-0.5853223
06032011	17	0.004	0.002	0.006	0.001	0.001	0.000	0.001	0.001	0.037	0.000	0.022	305.923	0.456	0.1036054E-01	1.199798	0.2935543E-04	1.611420
06032011	18	0.017	0.001	0.005	0.001	0.001	0.000	0.001	0.001	0.037	0.000	0.020	306.065	0.448	0.9862125E-02	1.053512	0.2335774E-04	1.654209
06032011	19	0.029	0.002	0.005	0.001	0.001	0.000	0.001	0.001	0.037	0.000	0.020	304.308	0.497	0.1259893E-01	1.218829	0.3146378E-04	1.588132
06032011	20	0.025	0.002	0.005	0.002	0.001	0.000	0.001	0.001	0.038	0.000	0.021	302.108	0.531	0.1615578E-01	1.398495	0.4538966E-04	1.488704
06032011	21	0.022	0.004	0.005	0.002	0.001	0.000	0.001	0.001	0.039	0.000	0.021	300.930	0.542	0.1781422E-01	1.438995	0.5240489E-04	1.438687
06032011	22	0.023	0.007	0.006	0.002	0.001	0.000	0.001	0.001	0.039	0.000	0.022	299.920	0.589	0.2044237E-01	1.745609	0.7027554E-04	1.395143
06032011	23	0.025	0.009	0.006	0.001	0.001	0.000	0.001	0.001	0.039	0.000	0.022	299.080	0.656	0.2556646E-01	2.154757	0.7986507E-04	1.431041
06032011	24	0.029	0.009	0.006	0.001	0.001	0.000	0.001	0.001	0.037	0.000	0.021	298.310	0.733	0.3050900E-01	2.592279	0.8831049E-04	1.467669
06042011	01	0.030	0.008	0.006	0.001	0.001	0.000	0.002	0.001	0.034	0.000	0.020	297.602	0.813	0.3716010E-01	3.410752	0.8910535E-04	1.582946
06042011	02	0.028	0.007	0.005	0.001	0.001	0.001	0.002	0.002	0.029	0.000	0.018	297.114	0.858	0.4205990E-01	3.831175	0.6999883E-04	1.738241
06042011	03	0.026	0.006	0.005	0.001	0.001	0.001	0.002	0.002	0.024	0.000	0.016	296.851	0.867	0.3931797E-01	3.586057	0.6449420E-04	1.745096
06042011	04	0.027	0.007	0.004	0.001	0.002	0.001	0.003	0.002	0.018	0.000	0.014	296.648	0.871	0.3694922E-01	3.073691	0.4733822E-04	1.812448
06042011	05	0.029	0.008	0.004	0.001	0.002	0.001	0.003	0.003	0.013	0.000	0.012	296.413	0.879	0.3724998E-01	2.488825	0.2712429E-04	1.962636
06042011	06	0.033	0.009	0.004	0.001	0.002	0.001	0.004	0.003	0.010	0.000	0.012	296.455	0.858	0.3431767E-01	2.159930	0.2250569E-04	1.982147
06042011	07	0.034	0.009	0.005	0.002	0.003	0.001	0.005	0.004	0.007	0.001	0.012	297.176	0.862	0.3738630E-01	1.943873	0.1224905E-04	2.200565
06042011	08	0.037	0.013	0.011	0.001	0.003	0.001	0.006	0.005	0.005	0.001	0.013	299.540	0.797	0.1726550E-01	1.416936	0.1086452E-04	2.115340
06042011	09	0.068	0.038	0.018	0.001	0.004	0.001	0.007	0.005	0.008	0.001	0.014	302.067	0.692	0.1229489E-01	1.057710	0.6914037E-05	2.184635
06042011	10	0.051	0.057	0.028	0.001	0.003	0.001	0.005	0.003	0.014	0.001	0.015	304.612	0.581	0.3580213E-02	0.9822621	0.2790433E-04	1.546556
06042011	11	0.022	0.059	0.035	0.000	0.002	0.000	0.003	0.002	0.019	0.001	0.014	306.570	0.492	NaN	1.174724	0.1053252E-01	-0.9525964
06042011	12	0.007	0.037	0.027	0.000	0.001	0.000	0.002	0.001	0.021	0.000	0.013	306.974	0.482	NaN	0.8397727	0.1801817E-01	-1.331549
06042011	13	0.003	0.023	0.018	0.001	0.001	0.000	0.002	0.001	0.019	0.000	0.014	306.327	0.502	0.000000	0.7786313	0.3684746E-02	-0.6750757
06042011	14	0.004	0.014	0.011	0.001	0.001	0.000	0.001	0.001	0.021	0.000	0.015	307.490	0.456	0.000000	0.7677364	0.4159667E-02	-0.7338464
06042011	15	0.004	0.014	0.011	0.001	0.001	0.000	0.001	0.001	0.028	0.000	0.017	308.873	0.404	0.4005551E-02	0.7608197	0.1742333E-04	1.640151
06042011	16	0.009	0.025	0.015	0.001	0.001	0.000	0.001	0.001	0.029	0.000	0.017	309.455	0.368	0.2979815E-02	0.6900225	0.1713631E-04	1.604946
06042011	17	0.013	0.015	0.011	0.001	0.001	0.000	0.001	0.001	0.029	0.000	0.017	305.339	0.527	0.7254541E-02	1.117990	0.3538877E-04	1.499572
06042011	18	0.015	0.008	0.006	0.001	0.001	0.000	0.002	0.001	0.029	0.000	0.017	304.318	0.589	0.1174045E-01	1.308107	0.2965649E-04	1.644524
06042011	19	0.025	0.009	0.006	0.001	0.001	0.000	0.002	0.001	0.030	0.000	0.018	303.185	0.620	0.1442552E-01	1.524171	0.3742902E-04	1.609825
06042011	20	0.038	0.012	0.006	0.002	0.001	0.000	0.002	0.002	0.027	0.000	0.017	301.224	0.603	0.1337677E-01	1.262071	0.4051389E-04	1.493480
06042011	21	0.034	0.012	0.005	0.002	0.001	0.001	0.002	0.003	0.024	0.000	0.017	299.912	0.595	0.1478618E-01	1.241749	0.3463490E-04	1.554520
06042011	22	0.027	0.011	0.003	0.003	0.002	0.001	0.003	0.004	0.019	0.000	0.017	299.793	0.555	0.1492614E-01	1.026208	0.2343025E-04	1.641459
06042011	23	0.028	0.012	0.003	0.004	0.002	0.001	0.004	0.006	0.015	0.000	0.017	298.724	0.633	0.1497811E-01	1.055849	0.2287300E-04	1.664279
06042011	24	0.034	0.012	0.003	0.004	0.002	0.001	0.005	0.007	0.011	0.001	0.017	297.977	0.722	0.1462638E-01	1.280030	0.2297466E-04	1.745971
06052011	01	0.034	0.011	0.003	0.004	0.003	0.002	0.005	0.008	0.008	0.001	0.017	297.526	0.764	0.2321362E-01	1.413104	0.1144533E-04	2.091546
06052011	02	0.038	0.011	0.003	0.004	0.003	0.002	0.006	0.009	0.005	0.001	0.017	296.960	0.831	0.6079441E-01	1.693328	0.4471357E-05	2.578302
06052011	03	0.041	0.012	0.002	0.004	0.003	0.002	0.007	0.010	0.002	0.001	0.017	296.686	0.856	0.1937720	1.879498	0.1046401E-05	3.254344
06052011	04	0.040	0.013	0.002	0.003	0.004	0.002	0.008	0.011	0.002	0.001	0.018	296.464	0.866	0.2164218	1.969861	0.1156411E-05	3.231323
06052011	05	0.040	0.016	0.002	0.003	0.004	0.002	0.009	0.012	0.002	0.002	0.018	296.290	0.871	0.1747172	1.662483	0.1026083E-05	3.209575
06052011	06	0.039	0.018	0.002	0.003	0.005	0.002	0.010	0.012	0.002	0.002	0.018	296.216	0.872	0.1695572	1.639134	0.9065511E-06	3.257222
06052011	07	0.039	0.021	0.004	0.003	0.005	0.002	0.011	0.013	0.002	0.002	0.019	297.107	0.848	0.1179654	1.383424	0.7301284E-06	3.277556
06052011	08	0.057	0.041	0.010	0.002	0.005	0.002	0.010	0.013	0.003	0.003	0.020	299.529	0.761	0.7237554E-01	1.049884	0.8578866E-06	3.087711
06052011	09	0.077	0.089	0.017	0.001	0.004	0.001	0.007	0.009	0.015	0.002	0.023	301.987	0.661	0.1078463E-01	1.459431	0.2594499E-04	1.750130
06052011	10	0.056	0.085	0.021	0.000	0.003	0.001	0.004	0.005	0.026	0.001	0.022	304.848	0.544	NaN	1.834172	0.7202323E-04	1.405967
06052011	11	0.038	0.076	0.021	0.000	0.002	0.000	0.003	0.003	0.030	0.001	0.021	306.951	0.457	NaN	1.380532	0.2049676E-03	0.8283615
06052011	12	0.032	0.056	0.018	0.000	0.001	0.000	0.003	0.003	0.029	0.000	0.019	308.640	0.402	NaN	0.9341733	0.1681331E-03	0.7447742
06052011	13	0.027	0.042	0.017	0.000	0.001	0.000	0.003	0.002	0.028	0.000	0.018	310.444	0.349	NaN	0.7477164	0.2217879E-03	0.5277991
06052011	14	0.019	0.025	0.015	0.000	0.001	0.000	0.003	0.002	0.030	0.000	0.019	310.285	0.338	NaN	0.7311972	0.5706724E-03	0.1076477
06052011	15	0.018	0.015	0.014	0.000	0.001	0.000	0.003	0.002	0.033	0.000	0.020	308.763	0.376	NaN	0.8949261	0.6449085E-03	0.1422891
06052011	16	0.019	0.009	0.012	0.000	0.001	0.000	0.003	0.001	0.035	0.000	0.021	306.379	0.433	NaN	1.154836	0.7625921E-03	0.1802281
06052011	17	0.026	0.010	0.010	0.000	0.001	0.000	0.003	0.002	0.035	0.000	0.022	307.691	0.368	NaN	0.9155600	0.3865031E-03	0.3745339
06052011	18	0.039	0.016	0.012	0.000	0.002	0.000	0.003	0.002	0.034	0.000	0.021	307.153	0.355	NaN	0.8818519	0.1641483E-03	0.7301593
06052011	19	0.041	0.020	0.009	0.001	0.002	0.000	0.003	0.002	0.033	0.000	0.021	305.953	0.366	0.5603969E-02	0.8021482	0.2383569E-04	1.527027
06052011	20	0.027	0.012	0.004	0.001	0.002	0.000	0.004	0.002	0.032	0.000	0.021	300.780	0.507	0.1682454E-01	1.205786	0.3674016E-04	1.516129
06052011	21	0.021	0.006	0.003	0.002	0.002	0.001	0.004	0.003	0.030	0.000	0.022	299.128	0.564	0.2346176E-01	1.462505	0.3790863E-04	1.586359
06052011	22	0.020	0.005	0.003	0.003	0.003	0.001	0.006	0.004	0.028	0.000	0.023	298.704	0.562	0.2321184E-01	1.436669	0.3958778E-04	1.559796
06052011	23	0.025	0.005	0.003	0.004	0.004	0.001	0.007	0.005	0.025	0.000	0.024	297.243	0.650	0.2811980E-01	1.902895	0.4614949E-04	1.615248
06052011	24	0.039	0.007	0.003	0.004	0.004	0.001	0.009	0.006	0.023	0.000	0.025	296.522	0.713	0.3288490E-01	2.302904	0.5017406E-04	1.661796
06062011	01	0.052	0.009	0.003	0.004	0.004	0.001	0.010	0.007	0.019	0.001	0.025	295.769	0.806	0.7789475E-01	3.270587	0.2935137E-04	2.046997
06062011	02	0.058	0.010	0.002	0.004	0.005	0.002	0.011	0.009	0.014	0.001	0.025	295.245	0.863	0.1695102	3.950434	0.1205216E-04	2.515580
06062011	03	0.053	0.011	0.002	0.004	0.005	0.002	0.013	0.010	0.010	0.001	0.025	294.869	0.887	0.2539385	4.728913	0.8289675E-05	2.756224
06062011	04	0.047	0.013	0.002	0.004	0.006	0.002	0.013	0.012	0.007	0.001	0.026	294.616	0.895	0.3113347	4.956632	0.6427947E-05	2.887114
06062011	05	0.040	0.014	0.002	0.004	0.006	0.002	0.013	0.012	0.007	0.002	0.026	294.394	0.894	0.2610807	4.508772	0.7313585E-05	2.789928
06062011	06	0.036	0.016	0.003	0.004	0.006	0.002	0.013	0.012	0.008	0.002	0.026	294.218	0.886	0.2513951	4.545761	0.8028117E-05	2.752993
06062011	07	0.035	0.016	0.004	0.004	0.006	0.002	0.013	0.012	0.008	0.002	0.027	295.022	0.889	0.1897633	4.761960	0.1209839E-04	2.595058
06062011	08	0.033	0.020	0.010	0.004	0.006	0.002	0.013	0.012	0.010	0.003	0.027	298.127	0.766	0.4292619E-01	2.369159	0.1350900E-04	2.243971
06062011	09	0.046	0.047	0.018	0.002	0.005	0.001	0.011	0.009	0.021	0.002	0.028	300.552	0.660	0.1193756E-01	1.920003	0.5051295E-04	1.579899
06062011	10	0.035	0.069	0.023	0.001	0.004	0.001	0.007	0.006	0.025	0.002	0.024	303.206	0.530	0.5521595E-02	1.238908	0.4715217E-04	1.419537
06062011	11	0.028	0.077	0.025	0.000	0.003	0.001	0.005	0.004	0.024	0.001	0.020	305.513	0.425	NaN	1.208933	0.3051604E-03	0.5978739
06062011	12	0.032	0.063	0.024	0.000	0.002	0.000	0.005	0.003	0.025	0.001	0.020	307.425	0.358	NaN	0.8789970	0.2674291E-03	0.5167787
06062011	13	0.039	0.052	0.024	0.000	0.002	0.000	0.005	0.003	0.029	0.001	0.021	309.388	0.298	NaN	0.7047004	0.8831872E-04	0.9019517
06062011	14	0.043	0.044	0.023	0.000	0.002	0.000	0.005	0.003	0.030	0.000	0.022	310.515	0.265	NaN	0.6273710	0.7223399E-04	0.9387829
06062011	15	0.047	0.038	0.021	0.000	0.002	0.000	0.005	0.003	0.030	0.000	0.022	310.491	0.260	NaN	0.5873449	0.6084257E-04	0.9846857
06062011	16	0.054	0.037	0.020	0.000	0.002	0.000	0.004	0.003	0.028	0.000	0.020	310.078	0.265	NaN	0.5688804	0.4095617E-04	1.142702
06062011	17	0.063	0.039	0.019	0.000	0.002	0.000	0.005	0.003	0.025	0.000	0.019	309.257	0.276	NaN	0.5498758	0.2690832E-04	1.310378
06062011	18	0.074	0.042	0.017	0.000	0.002	0.000	0.005	0.003	0.023	0.000	0.018	308.095	0.308	NaN	0.5865241	0.2313100E-04	1.404092
06062011	19	0.075	0.042	0.011	0.001	0.002	0.001	0.006	0.004	0.019	0.000	0.018	305.599	0.389	0.3633320E-02	0.6157374	0.1135610E-04	1.734166
06062011	20	0.072	0.040	0.008	0.002	0.003	0.001	0.006	0.005	0.016	0.000	0.018	302.734	0.385	0.4791796E-02	0.5881068	0.1395521E-04	1.624720
06062011	21	0.077	0.040	0.006	0.003	0.003	0.001	0.007	0.006	0.012	0.001	0.018	300.909	0.399	0.5069733E-02	0.5391168	0.1306984E-04	1.615413
06062011	22	0.074	0.041	0.005	0.004	0.004	0.001	0.008	0.008	0.008	0.001	0.019	299.605	0.438	0.5861819E-02	0.5516359	0.1127313E-04	1.689608
06062011	23	0.065	0.040	0.004	0.005	0.004	0.002	0.009	0.010	0.005	0.001	0.020	298.378	0.527	0.2261275E-01	0.6974809	0.2490637E-05	2.447222
06062011	24	0.054	0.038	0.003	0.005	0.004	0.002	0.010	0.011	0.003	0.001	0.021	297.420	0.625	0.4721612E-01	0.9649932	0.1830912E-05	2.721857
06072011	01	0.040	0.040	0.002	0.005	0.004	0.002	0.009	0.012	0.003	0.001	0.022	296.650	0.695	0.4594374E-01	1.252377	0.3970866E-05	2.498850
06072011	02	0.027	0.039	0.002	0.005	0.004	0.002	0.009	0.011	0.004	0.001	0.022	296.140	0.733	0.3120768E-01	1.509132	0.1061222E-04	2.152921
06072011	03	0.020	0.037	0.002	0.005	0.004	0.002	0.007	0.011	0.007	0.001	0.021	295.919	0.742	0.2572429E-01	1.448485	0.1337037E-04	2.034771
06072011	04	0.015	0.036	0.002	0.005	0.004	0.002	0.006	0.010	0.010	0.001	0.021	295.804	0.743	0.1978552E-01	1.589354	0.2691447E-04	1.771235
06072011	05	0.010	0.033	0.002	0.005	0.003	0.001	0.005	0.008	0.014	0.001	0.020	295.753	0.740	0.2296156E-01	1.660368	0.3776707E-04	1.643091
06072011	06	0.009	0.026	0.001	0.005	0.003	0.001	0.003	0.007	0.016	0.001	0.019	295.773	0.738	0.2726597E-01	1.684221	0.3821274E-04	1.644191
06072011	07	0.010	0.017	0.002	0.004	0.002	0.001	0.003	0.006	0.016	0.000	0.018	296.500	0.758	0.2862191E-01	1.791554	0.3449806E-04	1.715435
06072011	08	0.012	0.010	0.003	0.003	0.002	0.001	0.003	0.006	0.015	0.000	0.017	299.752	0.661	0.1559633E-01	1.178755	0.2104837E-04	1.748205
06072011	09	0.010	0.010	0.006	0.002	0.002	0.001	0.002	0.004	0.015	0.001	0.014	302.083	0.582	0.7511616E-02	0.8667969	0.2012662E-04	1.634146
06072011	10	0.010	0.014	0.010	0.001	0.002	0.000	0.002	0.002	0.016	0.001	0.012	304.184	0.517	0.4539430E-02	0.6736597	0.2221365E-04	1.481821
06072011	11	0.009	0.009	0.011	0.001	0.001	0.000	0.001	0.001	0.014	0.000	0.010	306.374	0.453	0.3050148E-02	0.4976480	0.1480401E-04	1.526543
06072011	12	0.008	0.006	0.010	0.000	0.001	0.000	0.001	0.001	0.012	0.000	0.008	307.988	0.410	NaN	0.4351404	0.1577578E-02	-0.5593615
06072011	13	0.004	0.003	0.008	0.000	0.001	0.000	0.001	0.001	0.013	0.000	0.008	306.804	0.436	NaN	0.4422782	0.2444844E-02	-0.7425557
06072011	14	0.005	0.001	0.005	0.000	0.000	0.000	0.001	0.001	0.012	0.000	0.007	306.419	0.450	NaN	0.3725089	0.6866083E-03	-0.2655725
06072011	15	0.009	0.001	0.004	0.001	0.000	0.000	0.001	0.001	0.013	0.000	0.008	307.113	0.426	0.3352642E-02	0.3459325	0.5506040E-05	1.798152
06072011	16	0.011	0.001	0.003	0.001	0.000	0.000	0.001	0.001	0.013	0.000	0.008	305.158	0.502	0.5337000E-02	0.4282475	0.7143389E-05	1.777791
06072011	17	0.014	0.000	0.002	0.001	0.001	0.000	0.001	0.001	0.013	0.000	0.008	306.346	0.468	0.5647302E-02	0.4097491	0.5086364E-05	1.906111
06072011	18	0.016	0.001	0.003	0.001	0.001	0.000	0.001	0.001	0.014	0.000	0.008	305.676	0.437	0.4508197E-02	0.3752886	0.6409076E-05	1.767570
06072011	19	0.016	0.001	0.003	0.002	0.001	0.000	0.001	0.001	0.014	0.000	0.009	303.638	0.461	0.6118298E-02	0.4552385	0.1026589E-04	1.646842
06072011	20	0.017	0.001	0.002	0.002	0.001	0.000	0.001	0.001	0.015	0.000	0.010	301.913	0.388	0.7811785E-02	0.4144777	0.1083098E-04	1.582834
06072011	21	0.022	0.001	0.002	0.003	0.001	0.000	0.002	0.001	0.015	0.000	0.010	300.619	0.388	0.7771432E-02	0.3957567	0.1147212E-04	1.537784
06072011	22	0.023	0.001	0.003	0.003	0.001	0.000	0.002	0.001	0.015	0.000	0.011	299.531	0.430	0.8779168E-02	0.5009892	0.1880811E-04	1.425483
06072011	23	0.022	0.002	0.003	0.002	0.001	0.000	0.002	0.001	0.016	0.000	0.011	298.646	0.492	0.1138616E-01	0.5996611	0.2338891E-04	1.408896
06072011	24	0.020	0.002	0.003	0.002	0.002	0.000	0.002	0.001	0.016	0.000	0.011	297.839	0.570	0.1386368E-01	0.7790666	0.2635438E-04	1.470722
06082011	01	0.020	0.003	0.003	0.002	0.002	0.001	0.002	0.001	0.015	0.000	0.011	297.104	0.656	0.1745778E-01	1.093249	0.2520967E-04	1.637152
06082011	02	0.020	0.003	0.003	0.002	0.002	0.001	0.002	0.002	0.015	0.000	0.012	296.567	0.717	0.2082199E-01	1.318634	0.2937421E-04	1.652158
06082011	03	0.021	0.003	0.002	0.002	0.002	0.001	0.002	0.002	0.014	0.000	0.012	296.214	0.751	0.2675956E-01	1.459914	0.2674784E-04	1.737039
06082011	04	0.021	0.003	0.002	0.002	0.002	0.001	0.003	0.002	0.013	0.000	0.012	295.927	0.778	0.2860862E-01	1.620523	0.2644449E-04	1.787320
06082011	05	0.022	0.002	0.002	0.002	0.002	0.001	0.003	0.002	0.013	0.000	0.012	295.683	0.803	0.3069520E-01	1.760379	0.2800317E-04	1.798399
06082011	06	0.024	0.002	0.002	0.002	0.002	0.001	0.003	0.003	0.012	0.000	0.012	295.536	0.828	0.3038502E-01	1.824744	0.2619342E-04	1.843010
06082011	07	0.028	0.002	0.003	0.002	0.003	0.001	0.003	0.003	0.012	0.000	0.012	296.468	0.838	0.2709121E-01	1.939690	0.2760259E-04	1.846783
06082011	08	0.025	0.003	0.005	0.001	0.003	0.001	0.003	0.003	0.012	0.000	0.012	298.348	0.782	0.1614946E-01	1.479741	0.2640625E-04	1.748479
06082011	09	0.019	0.012	0.008	0.001	0.003	0.001	0.003	0.002	0.018	0.001	0.015	300.236	0.712	0.1322383E-01	1.642555	0.4228203E-04	1.589364
06082011	10	0.011	0.017	0.017	0.001	0.002	0.001	0.002	0.002	0.022	0.001	0.015	302.111	0.636	0.7240951E-02	1.319107	0.4778401E-04	1.440997
06082011	11	0.004	0.019	0.027	0.000	0.002	0.000	0.002	0.002	0.025	0.001	0.016	303.776	0.571	NaN	1.244750	0.2110551E-01	-1.229314
06082011	12	0.004	0.016	0.025	0.000	0.001	0.000	0.001	0.002	0.022	0.000	0.015	305.300	0.522	NaN	0.9286789	0.2168724E-01	-1.368339
06082011	13	0.003	0.010	0.017	0.000	0.001	0.000	0.001	0.001	0.018	0.000	0.012	306.496	0.483	NaN	0.6819320	0.1476754E-01	-1.335567
06082011	14	0.003	0.006	0.012	0.000	0.001	0.000	0.001	0.001	0.015	0.000	0.011	306.787	0.474	0.3390074E-02	0.5867401	0.3394268E-02	-0.7623003
06082011	15	0.002	0.004	0.009	0.000	0.000	0.000	0.001	0.001	0.014	0.000	0.010	306.161	0.489	0.2095103E-03	0.5090009	0.3026407E-02	-0.7742088
06082011	16	0.002	0.007	0.008	0.000	0.000	0.000	0.000	0.001	0.014	0.000	0.010	305.160	0.520	0.9226799E-04	0.5491650	0.2979074E-02	-0.7343785
06082011	17	0.003	0.014	0.008	0.000	0.001	0.000	0.001	0.001	0.015	0.000	0.011	303.780	0.565	0.6336331E-02	0.7601739	0.2974733E-02	-0.5925351
06082011	18	0.002	0.023	0.007	0.000	0.001	0.000	0.001	0.001	0.018	0.000	0.012	302.318	0.613	0.9229958E-02	0.9688230	0.2954815E-02	-0.4842858
06082011	19	0.002	0.025	0.006	0.001	0.001	0.000	0.001	0.001	0.021	0.000	0.015	300.808	0.667	0.000000	1.391644	0.3301140E-02	-0.3751359
06082011	20	0.001	0.022	0.004	0.001	0.001	0.000	0.001	0.001	0.026	0.000	0.021	299.173	0.723	0.000000	2.259508	0.3709913E-02	-0.2153498
06082011	21	0.001	0.019	0.004	0.001	0.001	0.000	0.001	0.001	0.030	0.000	0.029	298.039	0.777	0.000000	4.303999	0.4395696E-02	-0.9155544E-02
06082011	22	0.000	0.015	0.003	0.001	0.001	0.000	0.001	0.001	0.031	0.000	0.039	297.272	0.816	0.000000	7.842780	0.1089128E-01	-0.1426089
06082011	23	0.000	0.012	0.002	0.001	0.001	0.000	0.001	0.001	0.032	0.000	0.046	296.644	0.852	0.000000	11.47524	0.1762162E-01	-0.1862839
06082011	24	0.000	0.012	0.002	0.001	0.001	0.000	0.001	0.001	0.032	0.000	0.050	296.070	0.893	0.000000	16.73322	0.2282271E-01	-0.1347876
06092011	01	0.000	0.013	0.002	0.000	0.001	0.000	0.001	0.001	0.033	0.000	0.047	295.499	0.941	0.6982982E-02	26.62801	0.2109917E-01	0.1010734
06092011	02	0.001	0.014	0.002	0.000	0.001	0.000	0.002	0.001	0.045	0.000	0.045	295.003	0.970	0.4916823E-01	48.95304	0.1357276E-01	0.5571117
06092011	03	0.002	0.014	0.002	0.000	0.002	0.000	0.003	0.001	0.055	0.000	0.041	294.713	0.984	0.2074729	69.23097	0.7548580E-02	0.9624351
06092011	04	0.004	0.012	0.001	0.001	0.002	0.000	0.004	0.001	0.061	0.000	0.037	294.497	0.990	0.000000	137.5165	0.4116991E-02	1.523775
06092011	05	0.013	0.007	0.001	0.001	0.003	0.000	0.005	0.002	0.062	0.000	0.036	294.345	0.990	0.8249089	132.0216	0.3322599E-03	2.599167
06092011	06	0.016	0.007	0.001	0.001	0.003	0.000	0.005	0.002	0.061	0.001	0.036	294.515	0.981	0.6006298	61.87214	0.2563815E-03	2.382608
06092011	07	0.023	0.010	0.002	0.001	0.004	0.000	0.006	0.002	0.060	0.001	0.037	294.864	0.956	0.3827220	29.90181	0.1746500E-03	2.233529
06092011	08	0.029	0.027	0.005	0.001	0.004	0.000	0.006	0.002	0.048	0.001	0.030	296.780	0.862	0.6783676E-01	6.660746	0.1426430E-03	1.669272
06092011	09	0.019	0.065	0.011	0.000	0.002	0.000	0.004	0.002	0.028	0.001	0.018	299.036	0.758	NaN	3.174960	0.2879067E-03	1.042486
06092011	10	0.011	0.064	0.012	0.000	0.002	0.000	0.003	0.001	0.023	0.000	0.015	301.256	0.655	NaN	1.838251	0.1488383E-02	0.9168998E-01
06092011	11	0.006	0.058	0.011	0.000	0.001	0.000	0.002	0.001	0.020	0.000	0.012	303.216	0.571	NaN	1.027898	0.3057127E-02	-0.4733635
06092011	12	0.005	0.039	0.009	0.000	0.001	0.000	0.001	0.001	0.017	0.000	0.010	305.155	0.491	NaN	0.6638581	0.2551533E-02	-0.5847259
06092011	13	0.008	0.025	0.008	0.000	0.001	0.000	0.001	0.001	0.015	0.000	0.009	306.771	0.433	NaN	0.5115405	0.7507011E-03	-0.1665871
06092011	14	0.010	0.019	0.008	0.000	0.001	0.000	0.001	0.001	0.015	0.000	0.009	307.544	0.412	NaN	0.4822080	0.4459223E-03	0.3397522E-01
06092011	15	0.008	0.010	0.008	0.000	0.000	0.000	0.001	0.001	0.017	0.000	0.010	305.063	0.488	NaN	0.6622537	0.1144478E-02	-0.2375828
06092011	16	0.009	0.003	0.006	0.000	0.001	0.000	0.001	0.001	0.017	0.000	0.010	303.707	0.552	NaN	0.8030533	0.5019779E-03	0.2040598
06092011	17	0.013	0.003	0.005	0.001	0.001	0.000	0.002	0.001	0.016	0.000	0.010	304.165	0.556	0.6520748E-02	0.6617117	0.1355060E-04	1.688710
06092011	18	0.020	0.005	0.004	0.001	0.001	0.000	0.002	0.001	0.014	0.000	0.010	304.135	0.579	0.7651865E-02	0.7033577	0.1253699E-04	1.748983
06092011	19	0.026	0.009	0.004	0.001	0.001	0.000	0.003	0.001	0.012	0.000	0.010	303.518	0.601	0.7994890E-02	0.7271917	0.1208340E-04	1.779460
06092011	20	0.035	0.012	0.004	0.001	0.001	0.000	0.003	0.002	0.011	0.000	0.010	302.031	0.567	0.7076263E-02	0.5816944	0.1178060E-04	1.693528
06092011	21	0.049	0.015	0.005	0.001	0.002	0.000	0.004	0.002	0.010	0.000	0.010	300.747	0.556	0.6419241E-02	0.5594814	0.1336593E-04	1.621786
06092011	22	0.059	0.018	0.006	0.001	0.002	0.000	0.005	0.003	0.008	0.000	0.011	299.675	0.590	0.6459296E-02	0.5966977	0.1464313E-04	1.610121
06092011	23	0.064	0.019	0.006	0.001	0.002	0.001	0.006	0.003	0.007	0.000	0.011	298.716	0.647	0.1486826E-01	0.7940117	0.6803046E-05	2.067123
06092011	24	0.061	0.020	0.005	0.001	0.003	0.001	0.007	0.004	0.005	0.000	0.012	297.936	0.710	0.2842307E-01	0.9933511	0.4268194E-05	2.366859
06102011	01	0.056	0.019	0.005	0.002	0.003	0.001	0.008	0.004	0.004	0.000	0.012	297.242	0.774	0.5124241E-01	1.245533	0.3043149E-05	2.612032
06102011	02	0.040	0.018	0.005	0.002	0.003	0.001	0.007	0.005	0.004	0.001	0.013	296.778	0.808	0.4245323E-01	1.480435	0.6186278E-05	2.378960
06102011	03	0.030	0.017	0.005	0.002	0.003	0.001	0.007	0.006	0.004	0.001	0.013	296.617	0.799	0.4494637E-01	1.249738	0.3658429E-05	2.533525
06102011	04	0.025	0.016	0.005	0.002	0.003	0.001	0.006	0.007	0.002	0.001	0.014	296.428	0.797	0.2676195E-01	1.244384	0.7520624E-05	2.218700
06102011	05	0.024	0.018	0.005	0.002	0.003	0.001	0.006	0.009	0.001	0.001	0.014	296.247	0.800	0.7906169E-01	0.9227793	0.1002225E-05	2.964133
06102011	06	0.025	0.019	0.005	0.002	0.004	0.001	0.006	0.010	0.001	0.001	0.014	296.366	0.775	0.5675685E-01	0.6337101	0.6064068E-06	3.019127
06102011	07	0.027	0.020	0.007	0.002	0.004	0.002	0.006	0.011	0.001	0.001	0.014	297.262	0.773	0.3018051E-01	0.4122247	0.2041622E-06	3.305159
06102011	08	0.028	0.020	0.015	0.002	0.004	0.002	0.006	0.011	0.001	0.001	0.014	299.990	0.701	0.1212883E-01	0.2772779	0.1329885E-06	3.319101
06102011	09	0.040	0.059	0.020	0.001	0.003	0.001	0.004	0.007	0.007	0.001	0.015	301.915	0.623	0.3616929E-02	0.7689410	0.2009048E-04	1.582903
06102011	10	0.017	0.066	0.017	0.000	0.001	0.000	0.001	0.003	0.022	0.000	0.015	303.659	0.544	NaN	1.257117	0.1082106E-02	0.6510612E-01
06102011	11	0.004	0.047	0.014	0.000	0.001	0.000	0.001	0.001	0.027	0.000	0.016	305.018	0.506	NaN	1.047247	0.9153983E-02	-0.9415610
06102011	12	0.002	0.023	0.011	0.000	0.000	0.000	0.001	0.001	0.023	0.000	0.018	304.352	0.541	0.4237890E-04	0.9456679	0.2926452E-02	-0.4906028
06102011	13	0.001	0.008	0.008	0.000	0.000	0.000	0.000	0.001	0.020	0.000	0.018	303.478	0.611	0.3761053E-04	1.295432	0.1611277E-02	-0.9475560E-01
06102011	14	0.001	0.006	0.006	0.001	0.000	0.000	0.000	0.001	0.019	0.000	0.018	304.022	0.624	0.000000	1.359541	0.1498489E-02	-0.4226108E-01
06102011	15	0.001	0.006	0.006	0.001	0.000	0.000	0.000	0.001	0.021	0.000	0.018	305.916	0.497	0.000000	0.8563675	0.1298970E-02	-0.1809391
06102011	16	0.001	0.007	0.007	0.001	0.000	0.000	0.000	0.001	0.019	0.000	0.018	305.924	0.471	0.000000	0.7820574	0.7620524E-03	0.1125381E-01
06102011	17	0.001	0.010	0.007	0.000	0.000	0.000	0.000	0.001	0.020	0.000	0.018	304.790	0.485	0.1090765E-04	0.8341998	0.9873389E-03	-0.7319619E-01
06102011	18	0.001	0.014	0.006	0.001	0.000	0.000	0.001	0.001	0.024	0.000	0.018	303.300	0.518	0.000000	0.8791151	0.3112498E-02	-0.5490633
06102011	19	0.001	0.020	0.006	0.001	0.000	0.000	0.001	0.001	0.026	0.000	0.019	301.541	0.570	0.000000	1.135389	0.4132830E-02	-0.5611030
06102011	20	0.002	0.027	0.005	0.001	0.001	0.000	0.001	0.001	0.028	0.000	0.019	299.719	0.607	0.000000	1.459433	0.4022658E-02	-0.4403290
06102011	21	0.002	0.036	0.004	0.001	0.001	0.000	0.001	0.001	0.028	0.000	0.019	298.367	0.666	0.000000	1.784443	0.3798936E-02	-0.3281592
06102011	22	0.002	0.041	0.004	0.001	0.001	0.000	0.001	0.001	0.029	0.000	0.019	297.873	0.675	0.000000	1.878653	0.3565920E-02	-0.2783249
06102011	23	0.003	0.042	0.005	0.001	0.001	0.000	0.001	0.001	0.031	0.000	0.019	297.328	0.707	0.1886487E-03	2.175361	0.3020048E-02	-0.1424824
06102011	24	0.004	0.042	0.008	0.001	0.001	0.000	0.002	0.001	0.033	0.000	0.019	296.900	0.748	0.2669638E-01	2.500834	0.9963063E-04	1.399692
06112011	01	0.008	0.044	0.012	0.001	0.002	0.000	0.002	0.001	0.031	0.000	0.019	296.447	0.800	0.2607292E-01	3.097415	0.1335905E-03	1.365224
06112011	02	0.012	0.044	0.016	0.001	0.002	0.000	0.003	0.002	0.029	0.001	0.019	296.117	0.831	0.2325547E-01	3.381723	0.1529727E-03	1.344524
06112011	03	0.017	0.042	0.018	0.001	0.002	0.001	0.003	0.002	0.026	0.001	0.018	295.834	0.848	0.2752441E-01	3.624378	0.1215801E-03	1.474371
06112011	04	0.021	0.041	0.017	0.000	0.003	0.001	0.004	0.003	0.023	0.001	0.018	295.594	0.857	NaN	6.307649	0.3293612E-03	1.282195
06112011	05	0.022	0.041	0.015	0.001	0.003	0.001	0.005	0.003	0.021	0.001	0.018	295.351	0.863	0.4412735E-01	3.661938	0.6765839E-04	1.733389
06112011	06	0.022	0.042	0.012	0.001	0.004	0.001	0.005	0.004	0.018	0.001	0.018	295.281	0.861	0.4516846E-01	3.421837	0.5681950E-04	1.779762
06112011	07	0.027	0.047	0.014	0.001	0.004	0.001	0.006	0.004	0.016	0.001	0.017	295.767	0.859	0.5150294E-01	3.210618	0.3668277E-04	1.942127
06112011	08	0.052	0.070	0.021	0.001	0.004	0.001	0.005	0.004	0.015	0.002	0.016	297.920	0.785	0.3351885E-01	2.091016	0.2346571E-04	1.949924
06112011	09	0.077	0.091	0.019	0.000	0.003	0.000	0.004	0.003	0.016	0.001	0.014	300.462	0.688	NaN	2.306068	0.2582846E-04	1.950774
06112011	10	0.076	0.093	0.018	0.000	0.002	0.000	0.002	0.002	0.018	0.000	0.012	303.406	0.569	NaN	1.330917	0.2396288E-04	1.744612
06112011	11	0.062	0.081	0.023	0.000	0.001	0.000	0.001	0.001	0.019	0.000	0.011	306.077	0.468	NaN	1.013649	0.2842976E-04	1.552114
06112011	12	0.036	0.039	0.019	0.000	0.000	0.000	0.001	0.001	0.018	0.000	0.010	307.962	0.412	NaN	0.6672877	0.4772518E-04	1.145566
06112011	13	0.009	0.015	0.014	0.000	0.000	0.000	0.000	0.000	0.023	0.000	0.012	307.068	0.425	0.6985664E-04	0.6279435	0.1013094E-02	-0.2077294
06112011	14	0.003	0.003	0.007	0.000	0.000	0.000	0.000	0.000	0.018	0.000	0.011	305.747	0.495	0.3786683E-03	0.6759560	0.4426714E-03	0.1838369
06112011	15	0.004	0.001	0.005	0.000	0.000	0.000	0.000	0.000	0.018	0.000	0.011	306.621	0.471	0.4929304E-04	0.6489675	0.1838389E-02	-0.4522145
06112011	16	0.003	0.001	0.004	0.000	0.000	0.000	0.001	0.000	0.017	0.000	0.010	304.354	0.570	NaN	0.7643195	0.2601895E-02	-0.5320148
06112011	17	0.003	0.001	0.003	0.000	0.000	0.000	0.000	0.000	0.014	0.000	0.009	302.537	0.675	0.1044810E-02	0.9533513	0.4011222E-03	0.3759763
06112011	18	0.003	0.001	0.003	0.000	0.000	0.000	0.000	0.000	0.014	0.000	0.009	301.533	0.767	0.2308726E-02	1.328942	0.3538273E-03	0.5747147
06112011	19	0.003	0.006	0.004	0.000	0.000	0.000	0.001	0.000	0.016	0.000	0.010	300.768	0.795	NaN	1.704578	0.2104362E-02	-0.9150378E-01
06112011	20	0.003	0.017	0.005	0.001	0.001	0.000	0.001	0.001	0.023	0.000	0.015	299.502	0.747	0.9572506E-04	1.955230	0.2969851E-02	-0.1815368
06112011	21	0.008	0.022	0.004	0.001	0.001	0.000	0.001	0.001	0.030	0.000	0.017	298.169	0.764	0.3199285E-01	2.321093	0.5906580E-04	1.594357
06112011	22	0.016	0.025	0.005	0.001	0.001	0.000	0.001	0.001	0.029	0.000	0.017	297.185	0.790	0.3290278E-01	2.628089	0.7174185E-04	1.563867
06112011	23	0.020	0.026	0.005	0.001	0.001	0.000	0.002	0.002	0.026	0.000	0.016	296.447	0.822	0.3293556E-01	2.639344	0.6735815E-04	1.593106
06112011	24	0.022	0.026	0.004	0.001	0.002	0.000	0.003	0.002	0.020	0.000	0.015	295.876	0.855	0.4043901E-01	3.091710	0.5989452E-04	1.712812
06122011	01	0.022	0.023	0.004	0.001	0.002	0.001	0.004	0.003	0.015	0.000	0.014	295.363	0.890	0.4569900E-01	3.278552	0.4218185E-04	1.890556
06122011	02	0.019	0.020	0.004	0.001	0.003	0.001	0.004	0.004	0.010	0.000	0.013	294.992	0.910	0.5629164E-01	3.262847	0.2871729E-04	2.055453
06122011	03	0.017	0.018	0.005	0.001	0.003	0.001	0.005	0.005	0.007	0.000	0.013	294.712	0.917	0.7056981E-01	3.287652	0.1981655E-04	2.219858
06122011	04	0.017	0.019	0.006	0.001	0.003	0.001	0.005	0.005	0.005	0.001	0.012	294.484	0.921	0.7952136E-01	2.955075	0.1350815E-04	2.339972
06122011	05	0.018	0.020	0.007	0.001	0.003	0.001	0.005	0.006	0.004	0.001	0.012	294.274	0.924	0.1090217	2.665799	0.7257276E-05	2.565054
06122011	06	0.020	0.021	0.007	0.001	0.003	0.001	0.005	0.006	0.003	0.001	0.012	294.192	0.924	0.1151409	2.683618	0.6983651E-05	2.584638
06122011	07	0.026	0.022	0.009	0.001	0.003	0.001	0.005	0.006	0.004	0.002	0.012	295.097	0.924	0.1205994	2.815706	0.6364765E-05	2.645805
06122011	08	0.025	0.020	0.015	0.001	0.004	0.001	0.005	0.006	0.003	0.002	0.012	297.680	0.833	0.4158890E-01	1.321093	0.3928769E-05	2.526677
06122011	09	0.018	0.088	0.035	0.000	0.003	0.001	0.003	0.004	0.009	0.001	0.012	299.654	0.753	NaN	2.573642	0.1374701E-01	-0.7276601
06122011	10	0.015	0.081	0.029	0.000	0.002	0.000	0.002	0.003	0.013	0.000	0.011	301.784	0.666	NaN	1.625618	0.1055157E-01	-0.8122984
06122011	11	0.020	0.076	0.028	0.000	0.001	0.000	0.001	0.002	0.017	0.000	0.012	303.598	0.583	NaN	1.409981	0.6587044E-02	-0.6694774
06122011	12	0.010	0.022	0.017	0.000	0.001	0.000	0.001	0.001	0.024	0.000	0.013	303.553	0.574	NaN	1.285755	0.3615553E-02	-0.4490164
06122011	13	0.005	0.002	0.007	0.000	0.000	0.000	0.000	0.001	0.020	0.000	0.011	304.455	0.543	NaN	0.8118493	0.2300731E-02	-0.4523905
06122011	14	0.005	0.000	0.004	0.000	0.000	0.000	0.000	0.000	0.012	0.000	0.006	304.355	0.571	0.8338690E-04	0.4716981	0.6262289E-03	-0.1230690
06122011	15	0.005	0.000	0.002	0.001	0.000	0.000	0.000	0.000	0.009	0.000	0.005	304.153	0.569	0.5888939E-04	0.3930818	0.6288950E-03	-0.2040952
06122011	16	0.006	0.000	0.002	0.001	0.000	0.000	0.000	0.000	0.007	0.000	0.004	305.453	0.498	0.2813339E-04	0.2574003	0.5058976E-03	-0.2934536
06122011	17	0.006	0.000	0.003	0.001	0.000	0.000	0.000	0.000	0.007	0.000	0.004	304.930	0.508	0.3355742E-04	0.2649007	0.4855878E-03	-0.2631847
06122011	18	0.007	0.000	0.002	0.001	0.000	0.000	0.000	0.000	0.007	0.000	0.004	304.061	0.519	0.5203485E-04	0.2726653	0.3889290E-03	-0.1542404
06122011	19	0.011	0.001	0.002	0.000	0.000	0.000	0.001	0.000	0.006	0.000	0.004	303.339	0.519	NaN	0.2918726	0.1233024E-03	0.3742218
06122011	20	0.019	0.001	0.002	0.000	0.000	0.000	0.001	0.000	0.006	0.000	0.004	301.147	0.579	NaN	0.3624629	0.5454652E-04	0.8224965
06122011	21	0.028	0.001	0.002	0.000	0.000	0.000	0.001	0.001	0.006	0.000	0.004	299.463	0.620	NaN	0.3287622	0.1786577E-04	1.264860
06122011	22	0.032	0.001	0.003	0.000	0.000	0.000	0.001	0.001	0.007	0.000	0.005	298.179	0.668	NaN	0.5509130	0.2200801E-04	1.398502
06122011	23	0.033	0.001	0.003	0.000	0.000	0.000	0.001	0.001	0.007	0.000	0.005	297.152	0.724	NaN	0.6706538	0.1979097E-04	1.530031
06122011	24	0.031	0.002	0.003	0.000	0.001	0.000	0.001	0.001	0.008	0.000	0.005	296.294	0.786	NaN	0.9360114	0.1816100E-04	1.712141
06132011	01	0.029	0.002	0.004	0.000	0.001	0.000	0.001	0.001	0.008	0.000	0.006	295.560	0.852	NaN	1.691383	0.2769154E-04	1.785895
06132011	02	0.027	0.003	0.004	0.000	0.001	0.000	0.002	0.001	0.009	0.000	0.007	295.084	0.888	NaN	2.626836	0.3142772E-04	1.922120
06132011	03	0.026	0.004	0.005	0.000	0.001	0.000	0.002	0.002	0.009	0.000	0.008	294.838	0.897	NaN	3.145491	0.3531873E-04	1.949683
06132011	04	0.025	0.004	0.005	0.000	0.001	0.001	0.002	0.002	0.009	0.000	0.009	294.681	0.896	NaN	3.465237	0.3541827E-04	1.990506
06132011	05	0.025	0.006	0.006	0.000	0.002	0.001	0.003	0.003	0.009	0.000	0.010	294.568	0.893	NaN	3.361051	0.2899514E-04	2.064150
06132011	06	0.026	0.007	0.006	0.001	0.002	0.001	0.003	0.004	0.009	0.000	0.012	294.569	0.886	0.4990202E-01	2.433655	0.2226833E-04	2.038571
06132011	07	0.031	0.009	0.009	0.001	0.003	0.001	0.004	0.005	0.009	0.001	0.013	295.581	0.878	0.5494183E-01	2.299747	0.1476709E-04	2.192385
06132011	08	0.030	0.010	0.015	0.001	0.003	0.001	0.005	0.005	0.008	0.001	0.013	298.714	0.790	0.1679790E-01	1.373573	0.1520845E-04	1.955767
06132011	09	0.026	0.058	0.034	0.000	0.004	0.001	0.004	0.005	0.010	0.001	0.015	300.970	0.695	NaN	2.695304	0.5748867E-02	-0.3289745
06132011	10	0.011	0.103	0.037	0.000	0.003	0.000	0.002	0.003	0.016	0.000	0.014	303.211	0.592	NaN	1.264665	0.2549398E-01	-1.304462
06132011	11	0.005	0.062	0.027	0.000	0.001	0.000	0.001	0.001	0.014	0.000	0.010	304.673	0.522	NaN	0.6815637	0.2342641E-01	-1.536199
06132011	12	0.005	0.034	0.018	0.000	0.001	0.000	0.001	0.001	0.012	0.000	0.008	306.395	0.461	NaN	0.4850115	0.1204613E-01	-1.395095
06132011	13	0.005	0.018	0.013	0.000	0.000	0.000	0.001	0.001	0.013	0.000	0.008	308.680	0.391	NaN	0.3586435	0.6605226E-02	-1.265225
06132011	14	0.006	0.008	0.011	0.000	0.000	0.000	0.001	0.001	0.013	0.000	0.008	309.744	0.360	NaN	0.3255319	0.3536877E-02	-1.036026
06132011	15	0.010	0.006	0.009	0.000	0.001	0.000	0.001	0.001	0.012	0.000	0.008	309.229	0.372	NaN	0.3775715	0.5236753E-03	-0.1420630
06132011	16	0.012	0.006	0.008	0.000	0.001	0.000	0.001	0.002	0.011	0.000	0.008	308.480	0.401	NaN	0.3758054	0.1712458E-03	0.3413431
06132011	17	0.013	0.006	0.007	0.000	0.001	0.000	0.001	0.001	0.010	0.000	0.008	307.266	0.439	NaN	0.4721696	0.3313208E-03	0.1538492
06132011	18	0.014	0.009	0.005	0.001	0.001	0.000	0.001	0.002	0.008	0.000	0.007	306.003	0.482	0.2685547E-02	0.3003074	0.5653700E-05	1.725233
06132011	19	0.016	0.009	0.003	0.001	0.001	0.000	0.001	0.002	0.006	0.000	0.006	304.331	0.560	0.3670812E-02	0.3018088	0.4672578E-05	1.810175
06132011	20	0.014	0.006	0.002	0.002	0.001	0.000	0.002	0.003	0.005	0.000	0.007	302.379	0.601	0.4716694E-02	0.3194833	0.3980228E-05	1.904540
06132011	21	0.012	0.005	0.002	0.002	0.001	0.001	0.002	0.003	0.003	0.000	0.007	301.162	0.608	0.5252182E-02	0.3965519	0.2788028E-05	2.153003
06132011	22	0.011	0.004	0.001	0.003	0.001	0.001	0.002	0.003	0.002	0.000	0.007	299.920	0.646	0.6995380E-02	0.4463576	0.3116409E-05	2.156029
06132011	23	0.010	0.003	0.001	0.003	0.001	0.001	0.002	0.004	0.001	0.000	0.007	298.782	0.671	0.5600452E-02	0.3681709	0.2228246E-05	2.218086
06132011	24	0.012	0.003	0.002	0.003	0.001	0.001	0.003	0.004	0.000	0.000	0.007	297.924	0.701	0.2851868E-01	0.3962387	0.3114589E-06	3.104556
06142011	01	0.014	0.003	0.002	0.003	0.001	0.001	0.003	0.005	0.000	0.000	0.007	297.019	0.746	0.2395481E-01	0.2687789	0.2412813E-06	3.046871
06142011	02	0.015	0.003	0.002	0.003	0.001	0.001	0.003	0.005	0.000	0.000	0.007	296.372	0.777	0.2980769E-01	0.3096627	0.2815222E-06	3.041376
06142011	03	0.015	0.003	0.002	0.002	0.002	0.001	0.003	0.005	0.000	0.001	0.008	295.994	0.789	0.4966748E-01	0.5363392	0.6361769E-06	2.925862
06142011	04	0.018	0.004	0.003	0.002	0.002	0.001	0.003	0.006	0.000	0.001	0.008	295.714	0.799	0.3240722E-01	0.3447330	0.3500334E-06	2.993373
06142011	05	0.022	0.005	0.003	0.002	0.002	0.001	0.004	0.006	0.000	0.001	0.008	295.489	0.808	0.3393894E-01	0.3391945	0.1730350E-06	3.292315
06142011	06	0.028	0.006	0.003	0.001	0.002	0.001	0.004	0.007	0.000	0.001	0.008	295.361	0.816	0.2226448E-01	0.1802383	0.7943973E-07	3.355809
06142011	07	0.036	0.006	0.005	0.001	0.002	0.001	0.004	0.007	0.000	0.001	0.008	296.248	0.827	0.2063078E-01	0.1949845	0.8955726E-07	3.337899
06142011	08	0.030	0.007	0.006	0.001	0.002	0.001	0.004	0.007	0.000	0.001	0.008	298.858	0.763	0.1008272E-01	0.1287522	0.5334698E-07	3.382645
06142011	09	0.031	0.034	0.020	0.001	0.002	0.001	0.003	0.005	0.003	0.001	0.009	301.310	0.660	0.5691051E-02	0.4657847	0.2375528E-05	2.292425
06142011	10	0.023	0.066	0.026	0.000	0.002	0.000	0.002	0.003	0.011	0.001	0.010	303.730	0.555	NaN	1.218247	0.1866869E-02	-0.1853787
06142011	11	0.012	0.052	0.019	0.000	0.001	0.000	0.001	0.002	0.012	0.000	0.009	305.595	0.475	NaN	0.6545898	0.5385980E-02	-0.9152955
06142011	12	0.009	0.032	0.014	0.000	0.001	0.000	0.001	0.001	0.011	0.000	0.008	307.414	0.404	NaN	0.4268828	0.4605568E-02	-1.032974
06142011	13	0.010	0.023	0.012	0.000	0.001	0.000	0.001	0.001	0.011	0.000	0.008	309.195	0.344	NaN	0.3401335	0.1904795E-02	-0.7481987
06142011	14	0.011	0.019	0.011	0.000	0.001	0.000	0.001	0.001	0.012	0.000	0.009	310.239	0.311	NaN	0.3301427	0.1402603E-02	-0.6282331
06142011	15	0.014	0.016	0.010	0.000	0.001	0.000	0.001	0.001	0.012	0.000	0.009	310.206	0.305	NaN	0.3351674	0.3548710E-03	-0.2480874E-01
06142011	16	0.016	0.012	0.009	0.000	0.001	0.000	0.001	0.001	0.012	0.000	0.008	309.780	0.314	NaN	0.2990118	0.1078042E-03	0.4430527
06142011	17	0.013	0.008	0.008	0.000	0.001	0.000	0.001	0.002	0.013	0.000	0.009	306.955	0.393	NaN	0.4076928	0.1853468E-03	0.3423480
06142011	18	0.010	0.005	0.005	0.001	0.001	0.000	0.001	0.002	0.013	0.000	0.009	304.495	0.497	0.4454255E-02	0.4466285	0.1045906E-04	1.630454
06142011	19	0.015	0.004	0.003	0.001	0.001	0.000	0.001	0.002	0.013	0.000	0.009	304.072	0.456	0.5293906E-02	0.3979647	0.8166150E-05	1.687827
06142011	20	0.022	0.006	0.004	0.002	0.001	0.000	0.002	0.002	0.013	0.000	0.009	302.336	0.478	0.4944205E-02	0.3999509	0.1016901E-04	1.594728
06142011	21	0.030	0.008	0.005	0.001	0.001	0.000	0.002	0.003	0.011	0.000	0.009	300.942	0.487	0.4279256E-02	0.3495047	0.1087167E-04	1.507157
06142011	22	0.037	0.010	0.006	0.001	0.001	0.001	0.002	0.003	0.010	0.000	0.010	299.894	0.515	0.5553961E-02	0.5096765	0.1242131E-04	1.613127
06142011	23	0.043	0.012	0.008	0.001	0.001	0.001	0.002	0.003	0.010	0.001	0.010	298.764	0.587	0.5993485E-02	0.6236159	0.2042252E-04	1.484808
06142011	24	0.041	0.012	0.009	0.001	0.001	0.001	0.003	0.003	0.011	0.001	0.010	297.538	0.693	0.9711087E-02	0.8298113	0.1588772E-04	1.717918
06152011	01	0.032	0.010	0.008	0.001	0.001	0.001	0.003	0.002	0.014	0.000	0.011	296.413	0.808	0.2135217E-01	1.653009	0.2918345E-04	1.753139
06152011	02	0.021	0.009	0.006	0.001	0.001	0.000	0.002	0.002	0.017	0.000	0.012	295.837	0.861	0.2617300E-01	2.375390	0.5716243E-04	1.618624
06152011	03	0.015	0.008	0.005	0.001	0.002	0.000	0.002	0.002	0.020	0.000	0.014	295.697	0.859	0.3444427E-01	2.864619	0.6526276E-04	1.642401
06152011	04	0.011	0.006	0.004	0.001	0.002	0.000	0.002	0.001	0.022	0.000	0.015	295.448	0.881	0.4983425E-01	3.853296	0.7349424E-04	1.719579
06152011	05	0.010	0.005	0.003	0.001	0.002	0.000	0.002	0.001	0.024	0.000	0.015	295.362	0.888	0.6009305E-01	4.185513	0.6640717E-04	1.799534
06152011	06	0.011	0.004	0.002	0.001	0.002	0.000	0.002	0.001	0.024	0.000	0.015	295.231	0.908	0.8144879E-01	5.079237	0.5993488E-04	1.928119
06152011	07	0.014	0.003	0.002	0.001	0.002	0.000	0.002	0.001	0.024	0.000	0.015	296.386	0.886	0.6742197E-01	4.185513	0.5060562E-04	1.917550
06152011	08	0.013	0.003	0.003	0.001	0.002	0.000	0.002	0.001	0.022	0.000	0.014	298.593	0.838	0.3795320E-01	2.747094	0.4325199E-04	1.802868
06152011	09	0.010	0.010	0.005	0.001	0.003	0.000	0.002	0.001	0.021	0.000	0.014	300.779	0.738	0.1875001E-01	1.772297	0.3812711E-04	1.667302
06152011	10	0.010	0.029	0.009	0.000	0.003	0.000	0.002	0.001	0.022	0.000	0.015	303.005	0.636	NaN	1.629807	0.1388883E-02	0.6947070E-01
06152011	11	0.015	0.034	0.016	0.000	0.002	0.000	0.001	0.001	0.019	0.001	0.013	305.060	0.549	NaN	1.241214	0.2900923E-02	-0.3686896
06152011	12	0.016	0.028	0.022	0.000	0.002	0.000	0.001	0.001	0.017	0.001	0.011	307.087	0.478	NaN	0.9300677	0.4805109E-02	-0.7131886
06152011	13	0.003	0.009	0.015	0.000	0.001	0.000	0.001	0.001	0.018	0.000	0.013	305.492	0.491	0.4313588E-03	0.7150010	0.3499326E-02	-0.6896778
06152011	14	0.001	0.001	0.006	0.000	0.000	0.000	0.000	0.001	0.013	0.000	0.011	306.427	0.458	0.7331371E-05	0.4249355	0.1202531E-02	-0.4517733
06152011	15	0.002	0.000	0.003	0.001	0.000	0.000	0.000	0.000	0.013	0.000	0.009	305.772	0.501	0.000000	0.4834665	0.2758688E-02	-0.7563363
06152011	16	0.003	0.000	0.002	0.000	0.000	0.000	0.000	0.000	0.011	0.000	0.008	305.412	0.495	0.5453825E-04	0.4510111	0.8171276E-03	-0.2581027
06152011	17	0.003	0.000	0.001	0.000	0.000	0.000	0.000	0.000	0.010	0.000	0.006	304.156	0.508	0.2706051E-04	0.3973510	0.1392345E-02	-0.5445727
06152011	18	0.007	0.000	0.001	0.001	0.000	0.000	0.000	0.000	0.010	0.000	0.005	303.036	0.591	0.1374483E-03	0.4163197	0.3625542E-03	0.6005399E-01
06152011	19	0.009	0.000	0.001	0.001	0.000	0.000	0.000	0.000	0.011	0.000	0.006	302.281	0.498	0.1504421E-03	0.3861004	0.3935370E-03	-0.8285306E-02
06152011	20	0.010	0.001	0.001	0.002	0.001	0.000	0.001	0.000	0.013	0.000	0.008	300.357	0.572	0.1525986E-01	0.6253824	0.1096527E-04	1.756126
06152011	21	0.009	0.001	0.001	0.003	0.001	0.000	0.001	0.000	0.014	0.000	0.008	299.670	0.588	0.1553696E-01	0.6631778	0.1290783E-04	1.710777
06152011	22	0.010	0.001	0.001	0.003	0.001	0.000	0.001	0.001	0.015	0.000	0.009	299.883	0.530	0.1363719E-01	0.5569798	0.1172134E-04	1.676862
06152011	23	0.010	0.001	0.001	0.003	0.001	0.000	0.001	0.001	0.015	0.000	0.009	299.016	0.578	0.1587981E-01	0.6440010	0.1368299E-04	1.672705
06152011	24	0.004	0.000	0.001	0.002	0.001	0.000	0.001	0.000	0.016	0.000	0.010	297.648	0.670	0.2760267E-01	1.059806	0.2031803E-04	1.717345
06162011	01	0.001	0.000	0.001	0.001	0.001	0.000	0.001	0.000	0.016	0.000	0.012	297.036	0.704	0.000000	1.255135	0.2868336E-02	-0.3589397
06162011	02	0.001	0.001	0.002	0.001	0.001	0.000	0.001	0.000	0.019	0.000	0.014	296.781	0.703	0.000000	1.458801	0.3435766E-02	-0.3720277
06162011	03	0.002	0.003	0.003	0.002	0.001	0.000	0.001	0.001	0.023	0.000	0.015	296.380	0.724	0.000000	1.723460	0.2635607E-02	-0.1844795
06162011	04	0.003	0.006	0.004	0.003	0.003	0.000	0.001	0.001	0.026	0.000	0.016	296.261	0.722	0.2848411E-01	1.912142	0.6892002E-04	1.443175
06162011	05	0.003	0.005	0.004	0.003	0.002	0.000	0.001	0.001	0.020	0.001	0.014	296.050	0.722	0.6037951E-04	1.645004	0.2297747E-02	-0.1451354
06162011	06	0.002	0.003	0.004	0.002	0.002	0.000	0.001	0.001	0.019	0.001	0.014	295.829	0.725	0.000000	1.647366	0.2587789E-02	-0.1961389
06162011	07	0.002	0.003	0.004	0.002	0.002	0.000	0.001	0.002	0.018	0.001	0.013	295.984	0.764	0.8827448E-04	1.903707	0.2306736E-02	-0.8339766E-01
06162011	08	0.003	0.004	0.004	0.002	0.002	0.000	0.001	0.002	0.017	0.001	0.012	298.090	0.706	0.1540619E-01	1.227911	0.4016566E-04	1.485312
06162011	09	0.002	0.004	0.005	0.001	0.002	0.000	0.001	0.001	0.012	0.001	0.009	299.344	0.661	0.9490311E-02	0.8393939	0.2872578E-04	1.465694
06162011	10	0.002	0.002	0.004	0.001	0.001	0.000	0.001	0.001	0.009	0.000	0.007	300.731	0.633	0.2270937E-04	0.7480665	0.2226002E-02	-0.4735852
06162011	11	0.002	0.002	0.005	0.001	0.001	0.000	0.001	0.001	0.010	0.001	0.007	303.051	0.585	0.4734337E-02	0.4966499	0.1270054E-04	1.592228
06162011	12	0.001	0.003	0.006	0.000	0.001	0.000	0.000	0.001	0.010	0.000	0.007	305.156	0.519	0.3848255E-02	0.4273807	0.2406856E-02	-0.7506353
06162011	13	0.001	0.002	0.006	0.000	0.000	0.000	0.000	0.000	0.009	0.000	0.007	306.854	0.485	0.7390976E-05	0.3310803	0.2818287E-03	0.6994799E-01
06162011	14	0.002	0.001	0.004	0.000	0.000	0.000	0.000	0.000	0.008	0.000	0.006	305.871	0.497	0.2127886E-04	0.3223110	0.6696730E-03	-0.3175876
06162011	15	0.006	0.000	0.003	0.000	0.000	0.000	0.000	0.000	0.006	0.000	0.003	305.145	0.531	0.3045797E-04	0.2103787	0.3187979E-03	-0.1805138
06162011	16	0.008	0.000	0.002	0.000	0.000	0.000	0.000	0.000	0.004	0.000	0.002	305.085	0.504	0.2342463E-04	0.1287001	0.1679434E-03	-0.1155840
06162011	17	0.007	0.000	0.001	0.000	0.000	0.000	0.000	0.000	0.003	0.000	0.001	304.527	0.475	0.1192093E-04	0.6075335E-01	0.8365096E-04	-0.1389008
06162011	18	0.011	0.000	0.001	0.000	0.000	0.000	0.000	0.000	0.002	0.000	0.001	303.280	0.463	0.2115965E-04	0.5727377E-01	0.5600772E-04	0.9707844E-02
06162011	19	0.019	0.000	0.001	0.000	0.000	0.000	0.000	0.000	0.002	0.000	0.001	302.127	0.518	0.6729364E-04	0.6816632E-01	0.2795759E-04	0.3870701
06162011	20	0.026	0.000	0.001	0.000	0.000	0.000	0.000	0.000	0.002	0.000	0.001	300.886	0.563	0.1504421E-03	0.7639419E-01	0.1790975E-04	0.6299708
06162011	21	0.024	0.000	0.001	0.000	0.000	0.000	0.000	0.000	0.001	0.000	0.001	299.697	0.617	0.2282262E-03	0.9090909E-01	0.1745485E-04	0.7166913
06162011	22	0.016	0.000	0.001	0.000	0.000	0.000	0.000	0.000	0.001	0.000	0.001	299.230	0.635	0.1789331E-03	0.9643202E-01	0.2544856E-04	0.5785580
06162011	23	0.010	0.000	0.001	0.000	0.000	0.000	0.000	0.000	0.001	0.000	0.001	298.761	0.679	0.1646280E-03	0.1092896	0.3748269E-04	0.4647481
06162011	24	0.007	0.000	0.000	0.000	0.000	0.000	0.000	0.000	0.001	0.000	0.001	298.039	0.761	NaN	0.1447178	0.7909071E-04	0.2623965
06172011	01	0.003	0.000	0.000	0.000	0.000	0.000	0.000	0.000	0.002	0.000	0.001	297.288	0.858	NaN	0.2386635	0.1076679E-03	0.3456998
06172011	02	0.002	0.000	0.000	0.000	0.000	0.000	0.000	0.000	0.003	0.000	0.002	296.824	0.919	NaN	0.8163266	0.2938853E-03	0.4436860
06172011	03	0.003	0.000	0.000	0.000	0.000	0.000	0.000	0.000	0.003	0.000	0.002	296.623	0.921	NaN	0.8163266	0.2423774E-03	0.5273718
06172011	04	0.004	0.000	0.000	0.000	0.000	0.000	0.000	0.000	0.002	0.000	0.001	296.453	0.925	NaN	0.4672897	0.9504039E-04	0.6916780
06172011	05	0.005	0.000	0.000	0.000	0.000	0.000	0.000	0.000	0.001	0.000	0.001	296.456	0.906	NaN	0.3636364	0.9236395E-04	0.5951648
06172011	06	0.007	0.000	0.000	0.000	0.001	0.000	0.000	0.000	0.001	0.000	0.001	296.490	0.911	NaN	0.3683853	0.1363980E-04	1.431494
06172011	07	0.007	0.000	0.000	0.000	0.001	0.000	0.000	0.000	0.001	0.000	0.001	297.599	0.862	NaN	0.2505654	0.1776266E-04	1.149413
06172011	08	0.005	0.001	0.001	0.000	0.000	0.000	0.000	0.000	0.002	0.000	0.002	299.077	0.811	0.1894832E-03	0.3597122	0.1831166E-03	0.2932274
06172011	09	0.001	0.005	0.005	0.000	0.000	0.000	0.000	0.000	0.006	0.000	0.005	300.129	0.772	0.1113415E-03	0.6998265	0.6022262E-03	0.6523070E-01
06172011	10	0.001	0.014	0.012	0.000	0.001	0.000	0.000	0.000	0.008	0.000	0.006	301.047	0.728	0.000000	0.7368459	0.1918034E-02	-0.4154796
06172011	11	0.001	0.017	0.014	0.000	0.001	0.000	0.000	0.000	0.009	0.000	0.007	301.911	0.691	0.000000	0.7177016	0.2056687E-02	-0.4572243
06172011	12	0.001	0.014	0.013	0.000	0.001	0.000	0.000	0.000	0.009	0.000	0.007	302.395	0.669	0.000000	0.6672099	0.2069107E-02	-0.4915206
06172011	13	0.001	0.012	0.011	0.000	0.000	0.000	0.000	0.000	0.009	0.000	0.007	302.440	0.662	0.4428625E-04	0.6186174	0.6917896E-03	-0.4855188E-01
06172011	14	0.001	0.011	0.011	0.000	0.000	0.000	0.000	0.000	0.010	0.000	0.008	302.315	0.659	0.4452467E-04	0.7145867	0.6955859E-03	0.1170419E-01
06172011	15	0.001	0.009	0.011	0.000	0.000	0.000	0.000	0.000	0.010	0.000	0.010	302.297	0.657	0.2169609E-04	0.9419703	0.5689894E-03	0.2189331
06172011	16	0.000	0.008	0.012	0.000	0.000	0.000	0.000	0.000	0.010	0.000	0.012	302.163	0.656	0.6198883E-05	1.320053	0.2521202E-02	-0.2810161
06172011	17	0.000	0.008	0.011	0.000	0.000	0.000	0.000	0.000	0.011	0.000	0.012	301.762	0.659	0.8583069E-05	1.235842	0.1641236E-02	-0.1232078
06172011	18	0.000	0.009	0.010	0.000	0.001	0.000	0.000	0.001	0.012	0.000	0.013	301.027	0.674	0.2837181E-04	1.207218	0.1369211E-02	-0.5468452E-01
06172011	19	0.001	0.015	0.007	0.000	0.001	0.000	0.000	0.001	0.014	0.000	0.014	299.993	0.699	0.8141994E-04	1.425018	0.1927244E-02	-0.1311161
06172011	20	0.001	0.022	0.004	0.001	0.001	0.000	0.001	0.001	0.018	0.000	0.017	298.361	0.741	0.000000	2.024384	0.2672174E-02	-0.1205719
06172011	21	0.001	0.024	0.003	0.001	0.001	0.000	0.001	0.001	0.023	0.000	0.019	297.516	0.763	0.000000	2.419251	0.3486211E-02	-0.1586727
06172011	22	0.002	0.020	0.003	0.001	0.002	0.000	0.001	0.001	0.025	0.000	0.018	296.821	0.805	0.000000	2.975911	0.3252187E-02	-0.3855552E-01
06172011	23	0.004	0.016	0.003	0.001	0.002	0.000	0.001	0.002	0.022	0.000	0.015	296.412	0.831	0.4054141E-01	2.607123	0.5273725E-04	1.694044
06172011	24	0.006	0.013	0.002	0.001	0.003	0.000	0.001	0.001	0.016	0.000	0.012	296.744	0.805	0.3747040E-01	2.012945	0.3541839E-04	1.754603
06182011	01	0.006	0.011	0.002	0.001	0.003	0.001	0.001	0.001	0.013	0.000	0.010	296.386	0.834	0.3269964E-01	1.861249	0.2651482E-04	1.846316
06182011	02	0.006	0.010	0.001	0.001	0.002	0.001	0.001	0.001	0.012	0.000	0.010	296.104	0.864	0.4870212E-01	2.184005	0.2166363E-04	2.003522
06182011	03	0.006	0.009	0.001	0.001	0.002	0.001	0.002	0.001	0.011	0.000	0.009	295.836	0.891	0.4941219E-01	2.392735	0.1990082E-04	2.080024
06182011	04	0.006	0.008	0.001	0.002	0.002	0.001	0.002	0.001	0.009	0.000	0.008	296.467	0.860	0.3137332E-01	1.695106	0.1629389E-04	2.017172
06182011	05	0.006	0.011	0.003	0.002	0.002	0.001	0.002	0.002	0.007	0.000	0.008	296.422	0.876	0.2045506E-01	1.661313	0.2077606E-04	1.902888
06182011	06	0.005	0.015	0.005	0.002	0.003	0.001	0.002	0.002	0.007	0.001	0.008	296.496	0.886	0.1619828E-01	1.802460	0.2924606E-04	1.789798
06182011	07	0.005	0.018	0.006	0.001	0.003	0.001	0.002	0.002	0.007	0.001	0.009	297.101	0.896	0.1900214E-01	2.286840	0.3601659E-04	1.802733
06182011	08	0.006	0.023	0.010	0.002	0.003	0.000	0.002	0.002	0.009	0.001	0.010	299.218	0.826	0.1114064E-01	1.614294	0.4290963E-04	1.575428
06182011	09	0.006	0.034	0.017	0.002	0.003	0.000	0.002	0.001	0.012	0.002	0.011	301.333	0.743	0.7185102E-02	1.369612	0.5227638E-04	1.418292
06182011	10	0.004	0.038	0.021	0.001	0.003	0.000	0.001	0.001	0.015	0.001	0.011	303.409	0.664	0.4964530E-02	1.062492	0.4564328E-04	1.366949
06182011	11	0.003	0.035	0.022	0.001	0.002	0.000	0.001	0.001	0.013	0.001	0.010	305.451	0.590	0.3238976E-02	0.7646899	0.3011912E-04	1.404643
06182011	12	0.002	0.028	0.018	0.001	0.002	0.000	0.001	0.001	0.011	0.001	0.009	307.212	0.526	0.1907349E-05	0.5753357	0.2900341E-02	-0.7025278
06182011	13	0.002	0.022	0.016	0.001	0.001	0.000	0.001	0.000	0.010	0.001	0.009	307.500	0.487	0.000000	0.4320000	0.1810314E-02	-0.6222703
06182011	14	0.001	0.016	0.013	0.001	0.001	0.000	0.000	0.000	0.010	0.000	0.009	308.483	0.447	0.000000	0.4005638	0.9717763E-03	-0.3848946
06182011	15	0.001	0.006	0.008	0.001	0.001	0.000	0.000	0.000	0.009	0.000	0.008	306.154	0.537	0.000000	0.4885880	0.1266768E-02	-0.4137544
06182011	16	0.003	0.001	0.004	0.001	0.001	0.000	0.000	0.000	0.013	0.000	0.007	305.750	0.518	0.4446507E-04	0.4955470	0.1048530E-02	-0.3254958
06182011	17	0.009	0.000	0.002	0.001	0.001	0.000	0.000	0.000	0.012	0.000	0.007	305.792	0.473	0.7307529E-04	0.4313735	0.5476412E-03	-0.1036427
06182011	18	0.013	0.000	0.001	0.001	0.001	0.000	0.001	0.000	0.011	0.000	0.006	305.011	0.548	0.8671105E-02	0.4415130	0.4185245E-05	2.023223
06182011	19	0.013	0.000	0.001	0.001	0.001	0.000	0.001	0.000	0.012	0.000	0.007	304.015	0.550	0.1085657E-01	0.5157521	0.5629312E-05	1.961986
06182011	20	0.016	0.001	0.002	0.001	0.001	0.000	0.001	0.000	0.012	0.000	0.007	301.995	0.562	0.9305358E-02	0.5309914	0.9824927E-05	1.732758
06182011	21	0.015	0.001	0.002	0.001	0.001	0.000	0.001	0.000	0.013	0.000	0.008	300.471	0.588	0.1259291E-01	0.6631778	0.1393576E-04	1.677499
06182011	22	0.009	0.001	0.001	0.002	0.001	0.000	0.001	0.000	0.013	0.000	0.008	299.223	0.703	0.2146620E-01	0.9369214	0.1425667E-04	1.817685
06182011	23	0.004	0.001	0.001	0.003	0.002	0.000	0.001	0.000	0.015	0.000	0.010	298.525	0.758	0.3044540E-01	1.469554	0.2373799E-04	1.791741
06182011	24	0.002	0.004	0.004	0.004	0.003	0.000	0.001	0.001	0.018	0.000	0.012	300.031	0.680	0.1494235E-01	1.240030	0.3414814E-04	1.560065
06192011	01	0.002	0.011	0.007	0.005	0.003	0.000	0.001	0.002	0.016	0.001	0.014	299.772	0.720	0.000000	1.479735	0.2739229E-02	-0.2674443
06192011	02	0.002	0.013	0.008	0.006	0.004	0.001	0.001	0.002	0.014	0.001	0.014	299.354	0.766	0.000000	1.888299	0.2395141E-02	-0.1032605
06192011	03	0.002	0.013	0.009	0.005	0.004	0.001	0.001	0.003	0.011	0.001	0.012	299.014	0.788	0.1382828E-04	2.232306	0.2475224E-02	-0.4486085E-01
06192011	04	0.003	0.011	0.009	0.004	0.004	0.001	0.002	0.002	0.010	0.001	0.011	298.570	0.799	0.1200885E-01	1.630854	0.4455150E-04	1.563553
06192011	05	0.004	0.009	0.008	0.004	0.004	0.001	0.002	0.002	0.010	0.001	0.011	298.240	0.827	0.1388347E-01	1.864437	0.4482259E-04	1.619051
06192011	06	0.005	0.008	0.007	0.003	0.004	0.001	0.002	0.002	0.009	0.001	0.010	297.928	0.862	0.1499623E-01	1.957573	0.3927297E-04	1.697624
06192011	07	0.006	0.008	0.008	0.002	0.004	0.001	0.002	0.002	0.009	0.001	0.010	298.465	0.876	0.1591831E-01	2.231780	0.4239996E-04	1.721286
06192011	08	0.007	0.009	0.010	0.002	0.003	0.000	0.002	0.002	0.009	0.002	0.009	300.478	0.808	0.8054733E-02	1.282706	0.3292973E-04	1.590539
06192011	09	0.008	0.012	0.014	0.002	0.003	0.000	0.001	0.001	0.010	0.002	0.009	302.103	0.733	0.5929947E-02	1.074454	0.3804564E-04	1.450883
06192011	10	0.007	0.013	0.015	0.002	0.003	0.000	0.001	0.001	0.012	0.001	0.009	303.763	0.658	0.4509389E-02	0.8573639	0.2990461E-04	1.457427
06192011	11	0.005	0.017	0.015	0.002	0.002	0.000	0.001	0.001	0.013	0.001	0.009	305.543	0.583	0.3318131E-02	0.6623024	0.2180760E-04	1.482448
06192011	12	0.003	0.023	0.016	0.001	0.002	0.000	0.001	0.001	0.014	0.001	0.009	307.601	0.495	0.2335548E-02	0.5293597	0.1556927E-04	1.531483
06192011	13	0.002	0.019	0.016	0.001	0.001	0.000	0.001	0.000	0.014	0.001	0.009	308.683	0.439	0.2045929E-02	0.4831634	0.1302744E-04	1.569235
06192011	14	0.002	0.015	0.013	0.001	0.001	0.000	0.000	0.000	0.014	0.000	0.009	309.008	0.396	0.000000	0.4174824	0.3392143E-02	-0.9098360
06192011	15	0.003	0.011	0.010	0.001	0.001	0.000	0.000	0.000	0.013	0.000	0.009	308.813	0.402	0.000000	0.4174824	0.3370489E-02	-0.9070547
06192011	16	0.003	0.006	0.007	0.001	0.001	0.000	0.000	0.000	0.013	0.000	0.010	308.450	0.377	0.000000	0.3785395	0.2955568E-02	-0.8925297
06192011	17	0.003	0.004	0.005	0.001	0.001	0.000	0.001	0.001	0.016	0.000	0.009	308.859	0.361	0.2537429E-02	0.3340771	0.5006694E-05	1.824296
06192011	18	0.006	0.003	0.004	0.001	0.001	0.000	0.001	0.001	0.015	0.000	0.009	308.128	0.392	0.3293157E-02	0.3683948	0.5449851E-05	1.829929
06192011	19	0.009	0.003	0.003	0.001	0.001	0.000	0.001	0.001	0.014	0.000	0.009	306.374	0.405	0.4543722E-02	0.3921747	0.6406819E-05	1.786837
06192011	20	0.011	0.004	0.002	0.002	0.001	0.000	0.001	0.001	0.014	0.000	0.010	303.691	0.453	0.8046567E-02	0.4976480	0.9551929E-05	1.716831
06192011	21	0.011	0.004	0.001	0.003	0.001	0.000	0.001	0.001	0.014	0.000	0.010	303.153	0.451	0.1048547E-01	0.4976480	0.8116344E-05	1.787562
06192011	22	0.006	0.003	0.002	0.003	0.002	0.000	0.001	0.001	0.015	0.000	0.010	302.358	0.515	0.1014674E-01	0.6278779	0.1314672E-04	1.679058
06192011	23	0.003	0.003	0.004	0.003	0.002	0.000	0.001	0.001	0.016	0.000	0.011	300.442	0.642	0.1234066E-01	0.9820778	0.2751137E-04	1.552634
06192011	24	0.003	0.004	0.005	0.002	0.002	0.000	0.001	0.001	0.016	0.000	0.012	299.875	0.686	0.3784895E-04	1.262166	0.2537227E-02	-0.3032429
06202011	01	0.003	0.005	0.005	0.003	0.002	0.000	0.001	0.002	0.016	0.000	0.012	299.368	0.746	0.1551574E-01	1.414994	0.3739837E-04	1.577902
06202011	02	0.003	0.012	0.006	0.003	0.002	0.000	0.001	0.002	0.011	0.001	0.010	299.043	0.784	0.2294779E-04	1.591525	0.2325438E-02	-0.1646914
06202011	03	0.002	0.016	0.008	0.002	0.002	0.000	0.001	0.002	0.007	0.001	0.008	298.827	0.800	0.1102686E-04	1.049785	0.1577531E-02	-0.1768777
06202011	04	0.002	0.016	0.008	0.002	0.002	0.000	0.001	0.002	0.005	0.001	0.007	298.616	0.812	0.7331371E-05	0.9186944	0.1376891E-02	-0.1757286
06202011	05	0.003	0.015	0.007	0.002	0.002	0.000	0.001	0.002	0.004	0.001	0.006	298.370	0.828	0.6862819E-02	0.8142940	0.2090177E-04	1.590598
06202011	06	0.004	0.013	0.006	0.003	0.003	0.000	0.001	0.002	0.002	0.001	0.006	298.091	0.847	0.7688880E-02	0.9218937	0.2124837E-04	1.637355
06202011	07	0.005	0.012	0.006	0.003	0.003	0.001	0.001	0.002	0.001	0.001	0.005	298.641	0.848	0.2336872E-01	0.7554878	0.2433314E-05	2.492029
06202011	08	0.006	0.015	0.008	0.003	0.003	0.001	0.001	0.002	0.000	0.001	0.005	300.580	0.766	0.1274633E-01	0.5532536	0.1946118E-05	2.453755
06202011	09	0.006	0.028	0.015	0.002	0.003	0.000	0.001	0.002	0.002	0.001	0.005	302.248	0.700	0.1958072E-02	0.3887802	0.1265609E-04	1.487405
06202011	10	0.004	0.032	0.020	0.001	0.002	0.000	0.001	0.001	0.004	0.001	0.004	303.916	0.632	0.1297414E-02	0.2980204	0.1048676E-04	1.453605
06202011	11	0.002	0.022	0.017	0.001	0.001	0.000	0.000	0.001	0.006	0.001	0.004	304.367	0.598	0.1400888E-02	0.2752746	0.1178352E-04	1.368491
06202011	12	0.002	0.015	0.014	0.001	0.001	0.000	0.000	0.001	0.006	0.000	0.005	305.976	0.531	0.1626372E-02	0.2988606	0.1053429E-04	1.452863
06202011	13	0.002	0.010	0.012	0.000	0.001	0.000	0.000	0.000	0.006	0.000	0.006	307.633	0.478	0.000000	0.2980656	0.1395297E-02	-0.6703548
06202011	14	0.001	0.005	0.010	0.000	0.001	0.000	0.000	0.000	0.007	0.000	0.006	307.743	0.483	0.000000	0.2980656	0.1395206E-02	-0.6703263
06202011	15	0.002	0.002	0.007	0.000	0.000	0.000	0.000	0.000	0.007	0.000	0.005	305.986	0.510	0.5495548E-04	0.2990771	0.3962940E-03	-0.1222343
06202011	16	0.003	0.001	0.004	0.000	0.000	0.000	0.000	0.000	0.008	0.000	0.005	306.245	0.476	0.1078844E-04	0.3037667	0.1403485E-02	-0.6646675
06202011	17	0.006	0.000	0.003	0.000	0.000	0.000	0.000	0.000	0.007	0.000	0.004	305.260	0.490	0.2789497E-04	0.2501564	0.5038858E-03	-0.3041205
06202011	18	0.010	0.000	0.001	0.000	0.000	0.000	0.001	0.000	0.005	0.000	0.003	303.805	0.675	NaN	0.3502982	0.8707041E-04	0.6045673
06202011	19	0.008	0.000	0.001	0.001	0.000	0.000	0.001	0.000	0.004	0.000	0.003	302.350	0.614	0.5419314E-02	0.2445195	0.2459095E-05	1.997538
06202011	20	0.005	0.000	0.001	0.001	0.000	0.000	0.000	0.000	0.003	0.000	0.002	300.053	0.669	0.8821487E-04	0.2116402	0.1917313E-03	0.4290508E-01
06202011	21	0.003	0.000	0.000	0.001	0.001	0.000	0.000	0.000	0.003	0.000	0.002	299.011	0.701	NaN	0.2510170	0.1715695E-03	0.1652631
06202011	22	0.002	0.000	0.000	0.001	0.001	0.000	0.000	0.000	0.003	0.000	0.002	298.357	0.749	NaN	0.2954189	0.2082152E-03	0.1519258
06202011	23	0.001	0.000	0.001	0.001	0.001	0.000	0.000	0.000	0.004	0.000	0.003	297.759	0.797	0.1350641E-03	0.5302364	0.6496672E-03	-0.8822142E-01
06202011	24	0.002	0.001	0.001	0.002	0.001	0.000	0.000	0.000	0.006	0.000	0.004	297.290	0.832	0.4242063E-03	0.8111064	0.4647776E-03	0.2418327
06212011	01	0.003	0.002	0.001	0.003	0.002	0.000	0.001	0.001	0.006	0.000	0.005	296.957	0.842	0.1573890E-01	0.8596834	0.1129970E-04	1.881272
06212011	02	0.004	0.004	0.001	0.002	0.002	0.000	0.001	0.001	0.004	0.000	0.005	296.930	0.833	0.1669616E-01	0.8142940	0.1012849E-04	1.905237
06212011	03	0.004	0.004	0.001	0.002	0.002	0.000	0.001	0.001	0.003	0.000	0.004	296.956	0.838	0.1270872E-01	0.6487129	0.7458094E-05	1.939425
06212011	04	0.004	0.004	0.001	0.002	0.002	0.000	0.001	0.001	0.002	0.000	0.004	297.032	0.843	0.1256073E-01	0.6487129	0.7225389E-05	1.953191
06212011	05	0.005	0.004	0.001	0.002	0.002	0.000	0.001	0.001	0.001	0.000	0.004	297.075	0.861	0.1352948E-01	0.7282211	0.7559171E-05	1.983789
06212011	06	0.006	0.004	0.001	0.002	0.002	0.000	0.001	0.001	0.001	0.000	0.004	297.126	0.885	0.1557779E-01	0.9036791	0.8304096E-05	2.036722
06212011	07	0.006	0.005	0.001	0.001	0.002	0.000	0.001	0.001	0.001	0.000	0.004	297.958	0.895	0.1812387E-01	0.9860055	0.7157935E-05	2.139091
06212011	08	0.006	0.008	0.001	0.002	0.002	0.000	0.001	0.001	0.001	0.000	0.004	299.652	0.849	0.1140785E-01	0.6853487	0.5907904E-05	2.064478
06212011	09	0.004	0.015	0.003	0.001	0.002	0.000	0.001	0.001	0.002	0.000	0.004	301.169	0.786	0.6025970E-02	0.5128214	0.6509882E-05	1.896393
06212011	10	0.002	0.018	0.005	0.001	0.001	0.000	0.000	0.001	0.004	0.000	0.003	302.444	0.730	0.2672493E-02	0.2760164	0.5862553E-05	1.672848
06212011	11	0.001	0.010	0.004	0.001	0.001	0.000	0.000	0.000	0.003	0.000	0.003	302.200	0.718	0.000000	0.3630447	0.1221812E-02	-0.5270442
06212011	12	0.001	0.002	0.002	0.000	0.000	0.000	0.000	0.000	0.004	0.000	0.004	302.352	0.709	0.2717972E-04	0.4454145	0.3165651E-03	0.1483012
06212011	13	0.001	0.001	0.002	0.000	0.000	0.000	0.000	0.000	0.004	0.000	0.003	303.147	0.680	0.6359816E-04	0.2976136	0.3082923E-03	-0.1531004E-01
06212011	14	0.001	0.000	0.001	0.000	0.000	0.000	0.000	0.000	0.006	0.000	0.003	303.033	0.679	0.3027916E-04	0.3278689	0.7492589E-03	-0.3589317
06212011	15	0.001	0.000	0.001	0.000	0.000	0.000	0.000	0.000	0.005	0.000	0.003	302.332	0.696	0.4839897E-04	0.3500583	0.7350000E-03	-0.3221469
06212011	16	0.001	0.001	0.001	0.000	0.000	0.000	0.000	0.000	0.003	0.000	0.003	301.640	0.711	0.2634525E-04	0.3288643	0.2807073E-03	0.6876311E-01
06212011	17	0.001	0.001	0.001	0.000	0.000	0.000	0.000	0.000	0.003	0.000	0.003	301.030	0.723	0.3004074E-04	0.3421098	0.3017272E-03	0.5455095E-01
06212011	18	0.001	0.002	0.001	0.000	0.000	0.000	0.000	0.000	0.004	0.000	0.004	300.423	0.733	0.3665686E-04	0.4832593	0.3930787E-03	0.8970068E-01
06212011	19	0.001	0.003	0.001	0.000	0.000	0.000	0.000	0.000	0.006	0.000	0.005	299.672	0.744	0.7909536E-04	0.6126953	0.6276917E-03	-0.1050181E-01
06212011	20	0.002	0.004	0.001	0.000	0.000	0.000	0.000	0.000	0.011	0.000	0.006	298.564	0.782	0.4041195E-03	0.9419153	0.7659041E-03	0.8983742E-01
06212011	21	0.007	0.004	0.001	0.000	0.000	0.000	0.001	0.000	0.014	0.000	0.007	297.974	0.806	NaN	1.299176	0.2047319E-03	0.8024824
06212011	22	0.011	0.004	0.001	0.000	0.000	0.000	0.001	0.000	0.014	0.000	0.008	297.528	0.824	NaN	1.562603	0.1776954E-03	0.9441723
06212011	23	0.008	0.004	0.001	0.000	0.001	0.000	0.001	0.000	0.013	0.000	0.008	296.959	0.852	NaN	1.849937	0.2241926E-03	0.9165357
06212011	24	0.005	0.003	0.001	0.000	0.001	0.000	0.001	0.000	0.013	0.000	0.007	296.313	0.888	NaN	2.183154	0.1961309E-03	1.046538
06222011	01	0.003	0.003	0.001	0.000	0.001	0.000	0.001	0.000	0.012	0.000	0.007	295.870	0.913	NaN	2.539618	0.3380382E-03	0.8758026
06222011	02	0.003	0.003	0.001	0.000	0.002	0.000	0.001	0.000	0.011	0.000	0.007	295.424	0.935	NaN	3.840722	0.2841171E-03	1.130916
06222011	03	0.002	0.004	0.001	0.000	0.002	0.000	0.001	0.000	0.010	0.000	0.007	295.433	0.937	NaN	3.819292	0.3004207E-03	1.104253
06222011	04	0.002	0.005	0.001	0.000	0.003	0.000	0.001	0.000	0.010	0.000	0.007	295.424	0.938	NaN	3.819292	0.3038650E-03	1.099302
06222011	05	0.001	0.006	0.002	0.000	0.002	0.000	0.001	0.000	0.009	0.000	0.009	295.360	0.938	0.6258249E-02	4.811527	0.2193080E-02	0.3412284
06222011	06	0.001	0.004	0.002	0.000	0.002	0.000	0.001	0.001	0.009	0.000	0.012	295.269	0.937	0.4024148E-02	5.984952	0.3097761E-02	0.2860127
06222011	07	0.000	0.003	0.002	0.000	0.002	0.000	0.001	0.001	0.010	0.000	0.014	295.294	0.933	0.2332628E-02	6.232133	0.4279578E-02	0.1632358
06222011	08	0.000	0.002	0.003	0.001	0.002	0.000	0.001	0.001	0.011	0.000	0.015	295.790	0.917	0.000000	6.079293	0.4370649E-02	0.1433071
06222011	09	0.000	0.003	0.005	0.001	0.002	0.000	0.001	0.001	0.011	0.000	0.019	297.679	0.875	0.000000	5.604424	0.7136592E-02	-0.1049599
06222011	10	0.000	0.007	0.008	0.000	0.001	0.000	0.000	0.001	0.008	0.000	0.017	299.958	0.805	0.7462502E-04	3.615054	0.8562531E-02	-0.3744874
06222011	11	0.000	0.005	0.006	0.000	0.001	0.000	0.000	0.000	0.004	0.000	0.008	299.386	0.812	0.000000	1.770921	0.3929096E-02	-0.3460936
06222011	12	0.000	0.002	0.004	0.000	0.000	0.000	0.000	0.000	0.004	0.000	0.006	300.792	0.801	0.2521276E-04	1.230638	0.2520581E-02	-0.3113705
06222011	13	0.000	0.000	0.002	0.000	0.000	0.000	0.000	0.000	0.003	0.000	0.004	301.573	0.782	0.1311302E-04	0.7224410	0.1334461E-02	-0.2665036
06222011	14	0.000	0.000	0.002	0.000	0.000	0.000	0.000	0.000	0.003	0.000	0.004	301.705	0.782	0.1287460E-04	0.7224410	0.1332485E-02	-0.2658600
06222011	15	0.000	0.000	0.001	0.000	0.000	0.000	0.000	0.000	0.002	0.000	0.003	301.087	0.800	0.1227856E-04	0.6153187	0.1256824E-02	-0.3101745
06222011	16	0.001	0.000	0.001	0.000	0.000	0.000	0.000	0.000	0.002	0.000	0.002	300.235	0.820	0.1110435E-03	0.3521127	0.2278255E-03	0.1890793
06222011	17	0.001	0.000	0.001	0.000	0.000	0.000	0.000	0.000	0.002	0.000	0.002	299.227	0.850	0.1826882E-03	0.4219410	0.2328007E-03	0.2582674
06222011	18	0.001	0.000	0.001	0.000	0.000	0.000	0.000	0.000	0.003	0.000	0.002	298.659	0.882	0.1848340E-03	0.5509642	0.4037573E-03	0.1350030
06222011	19	0.004	0.000	0.001	0.000	0.000	0.000	0.000	0.000	0.004	0.000	0.002	298.070	0.899	0.7249713E-03	0.6557378	0.1019185E-03	0.8084772
06222011	20	0.005	0.000	0.001	0.000	0.001	0.000	0.000	0.000	0.004	0.000	0.002	297.343	0.916	0.2173901E-02	0.8197138	0.4616631E-04	1.249337
06222011	21	0.006	0.001	0.001	0.000	0.001	0.000	0.000	0.000	0.004	0.000	0.003	297.005	0.925	0.3338337E-02	1.402966	0.8258835E-04	1.230128
06222011	22	0.006	0.001	0.001	0.000	0.001	0.000	0.001	0.000	0.003	0.000	0.003	296.866	0.935	NaN	1.942153	0.8316029E-04	1.368367
06222011	23	0.006	0.001	0.001	0.000	0.001	0.000	0.001	0.000	0.003	0.000	0.003	296.949	0.926	NaN	1.654883	0.8420045E-04	1.293453
06222011	24	0.006	0.001	0.001	0.000	0.002	0.000	0.001	0.000	0.004	0.000	0.003	296.972	0.936	NaN	2.001153	0.4708274E-04	1.628419
06232011	01	0.004	0.001	0.001	0.000	0.001	0.000	0.001	0.000	0.004	0.000	0.004	296.847	0.964	NaN	3.398099	0.2709929E-03	1.098278
06232011	02	0.004	0.001	0.001	0.000	0.001	0.000	0.001	0.000	0.005	0.000	0.004	296.915	0.967	NaN	4.872868	0.2003848E-03	1.385920
06232011	03	0.005	0.000	0.000	0.000	0.001	0.000	0.000	0.000	0.005	0.000	0.003	297.002	0.962	NaN	2.521008	0.7531312E-04	1.524704
06232011	04	0.006	0.000	0.000	0.000	0.001	0.000	0.000	0.000	0.005	0.000	0.003	297.050	0.965	NaN	3.454958	0.6470144E-04	1.727529
06232011	05	0.005	0.000	0.000	0.000	0.001	0.000	0.000	0.000	0.005	0.000	0.004	297.085	0.968	NaN	4.604384	0.1588348E-03	1.462226
06232011	06	0.006	0.001	0.000	0.000	0.002	0.000	0.000	0.000	0.005	0.000	0.004	297.178	0.968	NaN	4.611067	0.9182725E-04	1.700830
06232011	07	0.006	0.002	0.001	0.000	0.003	0.000	0.001	0.000	0.006	0.000	0.005	298.169	0.928	NaN	2.552739	0.1121002E-03	1.357400
06232011	08	0.002	0.007	0.003	0.000	0.002	0.000	0.000	0.000	0.007	0.000	0.005	299.124	0.882	0.7161498E-03	1.396914	0.4803605E-03	0.4636023
06232011	09	0.001	0.005	0.004	0.000	0.001	0.000	0.000	0.000	0.004	0.000	0.003	299.477	0.859	0.1711249E-03	0.7278923	0.5955407E-03	0.8715568E-01
06232011	10	0.001	0.001	0.003	0.000	0.000	0.000	0.000	0.000	0.004	0.000	0.003	300.365	0.835	0.4246235E-03	0.6062274	0.2606626E-03	0.3665568
06232011	11	0.001	0.000	0.002	0.000	0.000	0.000	0.000	0.000	0.004	0.000	0.004	301.013	0.800	0.8326769E-04	0.6646826	0.4690362E-03	0.1514080
06232011	12	0.001	0.000	0.002	0.000	0.000	0.000	0.000	0.000	0.005	0.000	0.004	301.976	0.754	0.8517504E-04	0.5012532	0.4351243E-03	0.6144382E-01
06232011	13	0.001	0.000	0.002	0.000	0.000	0.000	0.000	0.000	0.005	0.000	0.004	302.370	0.718	0.5960464E-04	0.4415011	0.4337147E-03	0.7727641E-02
06232011	14	0.001	0.000	0.002	0.000	0.000	0.000	0.000	0.000	0.005	0.000	0.003	302.442	0.705	0.5000830E-04	0.3618818	0.7280668E-03	-0.3036045
06232011	15	0.003	0.000	0.002	0.000	0.000	0.000	0.000	0.000	0.005	0.000	0.003	302.394	0.693	0.5215406E-04	0.3386005	0.5236996E-03	-0.1893947
06232011	16	0.004	0.000	0.002	0.000	0.000	0.000	0.000	0.000	0.006	0.000	0.003	302.349	0.683	0.8505583E-04	0.3278689	0.3219812E-03	0.7869641E-02
06232011	17	0.005	0.000	0.002	0.000	0.000	0.000	0.000	0.000	0.007	0.000	0.004	301.748	0.701	0.1502037E-03	0.4667445	0.3857216E-03	0.8280528E-01
06232011	18	0.006	0.001	0.002	0.001	0.000	0.000	0.000	0.000	0.009	0.000	0.005	301.195	0.715	0.2934337E-03	0.6242197	0.3651487E-03	0.2328677
06232011	19	0.009	0.001	0.001	0.001	0.000	0.000	0.001	0.000	0.011	0.000	0.006	301.145	0.755	0.1816994E-01	0.8571475	0.8109105E-05	2.024083
06232011	20	0.013	0.001	0.001	0.001	0.001	0.000	0.001	0.001	0.012	0.000	0.007	299.211	0.773	0.2085578E-01	0.9091882	0.1024337E-04	1.948211
06232011	21	0.013	0.002	0.001	0.002	0.001	0.000	0.001	0.001	0.013	0.000	0.008	298.322	0.760	0.2291846E-01	1.018633	0.1479842E-04	1.837803
06232011	22	0.011	0.003	0.001	0.002	0.001	0.000	0.001	0.001	0.014	0.000	0.009	297.626	0.779	0.2828318E-01	1.261349	0.1811991E-04	1.842679
06232011	23	0.009	0.003	0.001	0.002	0.001	0.000	0.001	0.001	0.014	0.000	0.009	296.934	0.817	0.3303874E-01	1.516034	0.2074034E-04	1.863893
06232011	24	0.008	0.002	0.001	0.002	0.002	0.000	0.001	0.001	0.013	0.000	0.009	296.341	0.869	0.4087085E-01	2.056191	0.2441970E-04	1.925323
06242011	01	0.007	0.002	0.001	0.002	0.002	0.000	0.001	0.001	0.012	0.000	0.009	295.864	0.905	0.5192137E-01	2.908003	0.2922689E-04	1.997812
06242011	02	0.007	0.001	0.001	0.001	0.003	0.000	0.001	0.001	0.011	0.000	0.009	295.544	0.933	0.7067835E-01	3.733188	0.2936560E-04	2.104241
06242011	03	0.006	0.001	0.001	0.001	0.004	0.000	0.001	0.001	0.009	0.000	0.009	295.386	0.946	0.8994818E-01	5.284971	0.3644000E-04	2.161464
06242011	04	0.006	0.001	0.001	0.001	0.005	0.000	0.001	0.002	0.008	0.000	0.009	295.250	0.953	0.7908279E-01	4.620541	0.3242666E-04	2.153790
06242011	05	0.006	0.001	0.001	0.001	0.005	0.000	0.001	0.002	0.007	0.000	0.009	295.117	0.955	0.9451020E-01	5.878851	0.3907394E-04	2.177405
06242011	06	0.008	0.001	0.001	0.001	0.006	0.000	0.001	0.002	0.006	0.000	0.009	294.973	0.954	0.7977533E-01	4.618362	0.3327559E-04	2.142362
06242011	07	0.011	0.002	0.001	0.001	0.006	0.000	0.001	0.002	0.006	0.000	0.009	295.799	0.954	0.7667005E-01	4.618362	0.3109994E-04	2.171728
06242011	08	0.011	0.005	0.003	0.002	0.005	0.000	0.001	0.002	0.006	0.000	0.009	297.991	0.872	0.2222341E-01	1.833472	0.2788218E-04	1.817948
06242011	09	0.007	0.010	0.007	0.001	0.003	0.000	0.001	0.002	0.009	0.001	0.009	299.695	0.809	0.1064408E-01	1.293520	0.3209465E-04	1.605341
06242011	10	0.002	0.012	0.010	0.000	0.002	0.000	0.001	0.001	0.012	0.000	0.009	301.456	0.734	NaN	1.108649	0.7460629E-02	-0.8279815
06242011	11	0.002	0.011	0.010	0.000	0.001	0.000	0.001	0.001	0.011	0.000	0.009	303.256	0.664	0.6519556E-03	0.7905117	0.2474773E-02	-0.4956270
06242011	12	0.002	0.011	0.010	0.000	0.001	0.000	0.001	0.001	0.012	0.000	0.008	304.926	0.583	NaN	0.6205306	0.6898496E-02	-1.045991
06242011	13	0.003	0.010	0.009	0.000	0.001	0.000	0.001	0.001	0.012	0.000	0.008	306.402	0.541	NaN	0.5710031	0.4888500E-02	-0.9325371
06242011	14	0.002	0.004	0.007	0.000	0.000	0.000	0.001	0.001	0.013	0.000	0.008	304.422	0.609	NaN	0.6526350	0.4070716E-02	-0.7950004
06242011	15	0.004	0.001	0.004	0.001	0.000	0.000	0.001	0.001	0.012	0.000	0.007	303.428	0.625	0.6148398E-02	0.5426821	0.1001758E-04	1.733783
06242011	16	0.006	0.000	0.003	0.001	0.000	0.000	0.001	0.001	0.012	0.000	0.007	302.851	0.635	0.7472813E-02	0.5601557	0.9456737E-05	1.772568
06242011	17	0.006	0.000	0.002	0.001	0.000	0.000	0.001	0.001	0.011	0.000	0.007	302.587	0.653	0.9370089E-02	0.5786890	0.8181668E-05	1.849603
06242011	18	0.006	0.000	0.002	0.002	0.000	0.000	0.001	0.001	0.012	0.000	0.008	301.598	0.672	0.1167399E-01	0.7244340	0.1173750E-04	1.790423
06242011	19	0.006	0.001	0.002	0.002	0.001	0.000	0.001	0.001	0.013	0.000	0.009	300.484	0.653	0.1376045E-01	0.7955450	0.1541809E-04	1.712634
06242011	20	0.007	0.001	0.002	0.002	0.001	0.000	0.001	0.001	0.013	0.000	0.009	298.465	0.696	0.1776153E-01	0.9369212	0.2075159E-04	1.654652
06242011	21	0.008	0.001	0.002	0.003	0.001	0.000	0.001	0.001	0.011	0.000	0.008	297.871	0.640	0.1312727E-01	0.6746848	0.1802554E-04	1.573213
06242011	22	0.011	0.001	0.002	0.003	0.001	0.000	0.001	0.001	0.010	0.000	0.008	297.199	0.675	0.1475573E-01	0.7672336	0.1956795E-04	1.593382
06242011	23	0.014	0.002	0.002	0.003	0.001	0.000	0.002	0.002	0.009	0.000	0.008	296.854	0.700	0.1282185E-01	0.6893367	0.1560980E-04	1.645034
06242011	24	0.018	0.002	0.003	0.003	0.001	0.000	0.002	0.002	0.009	0.000	0.008	296.369	0.746	0.1285696E-01	0.8295252	0.2024144E-04	1.612588
06252011	01	0.022	0.004	0.004	0.002	0.001	0.001	0.002	0.002	0.007	0.000	0.008	295.794	0.815	0.1469880E-01	1.167378	0.2024493E-04	1.760895
06252011	02	0.026	0.006	0.005	0.002	0.002	0.001	0.002	0.004	0.004	0.001	0.008	295.355	0.865	0.3603441E-01	1.081730	0.4572447E-05	2.373970
06252011	03	0.029	0.010	0.005	0.001	0.002	0.001	0.003	0.005	0.001	0.001	0.008	295.109	0.884	0.9431648E-01	0.9405627	0.9438029E-06	2.998506
06252011	04	0.032	0.012	0.005	0.001	0.002	0.001	0.003	0.006	0.001	0.001	0.008	294.945	0.894	0.7208115E-01	0.6783788	0.5737174E-06	3.072774
06252011	05	0.036	0.012	0.005	0.001	0.002	0.001	0.003	0.006	0.001	0.001	0.008	294.811	0.903	0.8554369E-01	0.7709520	0.6150118E-06	3.098144
06252011	06	0.037	0.011	0.004	0.001	0.002	0.001	0.003	0.005	0.002	0.001	0.008	294.748	0.914	0.1528748	1.302819	0.1012971E-05	3.109287
06252011	07	0.033	0.007	0.003	0.001	0.002	0.001	0.003	0.004	0.004	0.001	0.008	295.775	0.914	0.1017131	1.542697	0.2127088E-05	2.860495
06252011	08	0.019	0.004	0.004	0.001	0.002	0.001	0.002	0.003	0.005	0.001	0.008	297.705	0.857	0.1202726E-01	1.217821	0.1549577E-04	1.895370
06252011	09	0.015	0.010	0.010	0.000	0.002	0.000	0.001	0.003	0.005	0.001	0.007	299.520	0.784	NaN	1.574123	0.1706035E-03	0.9650507
06252011	10	0.014	0.010	0.011	0.000	0.001	0.000	0.001	0.002	0.005	0.001	0.006	301.422	0.707	NaN	1.144700	0.3908077E-03	0.4667287
06252011	11	0.015	0.011	0.012	0.000	0.001	0.000	0.001	0.002	0.006	0.000	0.005	303.178	0.638	NaN	0.7888738	0.8332616E-04	0.9762262
06252011	12	0.016	0.013	0.012	0.000	0.001	0.000	0.001	0.001	0.007	0.000	0.006	304.700	0.579	NaN	0.7698855	0.2144841E-03	0.5550311
06252011	13	0.016	0.013	0.012	0.000	0.001	0.000	0.001	0.002	0.007	0.000	0.006	306.310	0.528	NaN	0.5748010	0.8904609E-04	0.8099026
06252011	14	0.014	0.004	0.011	0.000	0.001	0.000	0.001	0.002	0.010	0.001	0.008	305.438	0.549	NaN	0.7530843	0.3477456E-03	0.3355819
06252011	15	0.012	0.000	0.007	0.000	0.000	0.000	0.001	0.002	0.008	0.000	0.006	304.821	0.575	NaN	0.4991129	0.1002323E-03	0.6971909
06252011	16	0.012	0.000	0.005	0.000	0.000	0.000	0.001	0.001	0.006	0.000	0.005	304.017	0.589	NaN	0.4698296	0.1176269E-03	0.6014338
06252011	17	0.014	0.000	0.005	0.000	0.000	0.000	0.001	0.002	0.004	0.000	0.004	303.788	0.591	NaN	0.3117539	0.2100335E-04	1.171523
06252011	18	0.016	0.001	0.006	0.000	0.001	0.000	0.001	0.002	0.004	0.001	0.005	303.275	0.600	NaN	0.4977385	0.4202609E-04	1.073482
06252011	19	0.017	0.002	0.006	0.001	0.001	0.000	0.001	0.003	0.003	0.001	0.005	302.268	0.645	0.1623333E-02	0.1991235	0.3997154E-05	1.697372
06252011	20	0.020	0.002	0.004	0.001	0.001	0.000	0.002	0.003	0.001	0.001	0.006	300.586	0.688	0.3348172E-02	0.3266097	0.5165810E-05	1.800891
06252011	21	0.024	0.003	0.004	0.002	0.001	0.001	0.002	0.004	0.000	0.001	0.006	299.453	0.709	0.1862466E-01	0.2702537	0.2237129E-06	3.082081
06252011	22	0.026	0.004	0.004	0.002	0.002	0.001	0.002	0.004	0.000	0.001	0.006	298.653	0.743	0.2512193E-01	0.2893130	0.4426763E-06	2.815282
06252011	23	0.024	0.005	0.005	0.002	0.002	0.001	0.003	0.005	0.000	0.001	0.007	298.101	0.781	0.2252644E-01	0.3128391	0.2944014E-06	3.026381
06252011	24	0.018	0.004	0.004	0.002	0.002	0.001	0.003	0.004	0.001	0.001	0.007	297.678	0.844	0.4581636E-01	0.6819937	0.7934295E-06	2.934272
06262011	01	0.010	0.002	0.002	0.002	0.002	0.001	0.002	0.003	0.003	0.000	0.007	297.305	0.893	0.1503909E-01	1.195130	0.9710206E-05	2.090187
06262011	02	0.007	0.001	0.001	0.001	0.002	0.000	0.002	0.002	0.005	0.000	0.006	297.067	0.921	0.2868760E-01	1.620369	0.1044725E-04	2.190612
06262011	03	0.004	0.000	0.001	0.001	0.002	0.000	0.001	0.001	0.006	0.000	0.006	296.989	0.923	0.3768063E-01	2.038062	0.1495334E-04	2.134479
06262011	04	0.003	0.000	0.000	0.001	0.001	0.000	0.001	0.001	0.007	0.000	0.006	296.949	0.919	NaN	2.034674	0.8358083E-05	2.386388
06262011	05	0.004	0.000	0.000	0.001	0.001	0.000	0.001	0.001	0.007	0.000	0.006	296.894	0.915	NaN	2.034674	0.8398588E-05	2.384289
06262011	06	0.005	0.001	0.001	0.001	0.002	0.000	0.001	0.001	0.007	0.000	0.006	296.897	0.905	0.3499371E-01	1.817094	0.1430507E-04	2.103887
06262011	07	0.009	0.003	0.001	0.001	0.002	0.000	0.001	0.001	0.007	0.000	0.006	297.930	0.899	0.3095573E-01	1.641743	0.1247297E-04	2.119335
06262011	08	0.009	0.009	0.003	0.002	0.003	0.000	0.001	0.001	0.007	0.000	0.007	300.291	0.821	0.1379490E-01	1.167267	0.1709777E-04	1.834231
06262011	09	0.003	0.037	0.013	0.001	0.002	0.000	0.001	0.001	0.007	0.000	0.007	301.905	0.754	0.1090765E-04	1.136442	0.2316715E-02	-0.3093252
06262011	10	0.002	0.032	0.017	0.000	0.001	0.000	0.001	0.001	0.007	0.000	0.007	303.643	0.672	0.3510714E-03	0.6060445	0.2023801E-02	-0.5236632
06262011	11	0.002	0.018	0.013	0.000	0.001	0.000	0.000	0.001	0.009	0.000	0.008	305.266	0.592	0.7879734E-04	0.5368573	0.2402169E-02	-0.6507447
06262011	12	0.002	0.004	0.008	0.000	0.000	0.000	0.000	0.001	0.008	0.000	0.007	304.710	0.598	0.5614758E-04	0.4503197	0.2107925E-02	-0.6703342
06262011	13	0.003	0.000	0.003	0.000	0.000	0.000	0.000	0.001	0.009	0.000	0.006	305.521	0.557	NaN	0.3997061	0.1614017E-02	-0.6061674
06262011	14	0.005	0.000	0.002	0.001	0.000	0.000	0.000	0.001	0.008	0.000	0.005	305.729	0.556	0.4430950E-02	0.3055768	0.4091420E-05	1.873246
06262011	15	0.005	0.000	0.002	0.000	0.000	0.000	0.000	0.000	0.007	0.000	0.004	305.123	0.580	0.3772974E-04	0.3236246	0.5508239E-03	-0.2309712
06262011	16	0.005	0.000	0.001	0.000	0.000	0.000	0.000	0.000	0.006	0.000	0.003	304.191	0.611	0.4780293E-04	0.2647838	0.3267959E-03	-0.9138521E-01
06262011	17	0.005	0.000	0.001	0.000	0.000	0.000	0.000	0.000	0.004	0.000	0.003	302.021	0.685	0.7581711E-04	0.3386005	0.3906363E-03	-0.6208504E-01
06262011	18	0.005	0.000	0.001	0.000	0.000	0.000	0.000	0.000	0.004	0.000	0.002	300.496	0.781	0.1791716E-03	0.3139718	0.1360399E-03	0.3632243
06262011	19	0.005	0.002	0.001	0.001	0.000	0.000	0.000	0.000	0.004	0.000	0.003	299.315	0.845	0.3952384E-03	0.6711410	0.2398635E-03	0.4468496
06262011	20	0.005	0.004	0.001	0.001	0.001	0.000	0.001	0.001	0.006	0.000	0.004	297.994	0.860	0.1471299E-01	0.7163192	0.6099414E-05	2.069818
06262011	21	0.004	0.004	0.001	0.001	0.001	0.000	0.001	0.001	0.008	0.000	0.006	297.286	0.877	0.2854460E-01	1.375684	0.1201211E-04	2.058899
06262011	22	0.005	0.003	0.001	0.001	0.001	0.000	0.001	0.001	0.009	0.000	0.006	297.064	0.874	0.2743739E-01	1.277916	0.1186676E-04	2.032170
06262011	23	0.006	0.002	0.001	0.001	0.001	0.000	0.001	0.001	0.007	0.000	0.006	297.051	0.873	0.2745372E-01	1.277916	0.1187741E-04	2.031781
06262011	24	0.007	0.001	0.001	0.002	0.002	0.000	0.001	0.002	0.005	0.000	0.006	297.081	0.852	0.1764327E-01	0.9090623	0.1015906E-04	1.951740
06272011	01	0.009	0.001	0.002	0.003	0.002	0.001	0.002	0.003	0.002	0.000	0.006	297.307	0.827	0.4583144E-01	0.6649535	0.8007162E-06	2.919313
06272011	02	0.009	0.001	0.002	0.003	0.002	0.001	0.002	0.004	0.000	0.000	0.006	297.462	0.810	0.2602988E-01	0.3786931	0.6728277E-06	2.750384
06272011	03	0.007	0.001	0.001	0.005	0.003	0.001	0.003	0.005	0.000	0.001	0.006	297.458	0.825	0.8072913E-02	0.1844196	0.1626776E-06	3.054479
06272011	04	0.005	0.001	0.000	0.006	0.003	0.001	0.003	0.005	0.000	0.002	0.006	297.447	0.828	0.6441891E-02	0.1836894	0.2031854E-06	2.956192
06272011	05	0.005	0.002	0.002	0.005	0.003	0.001	0.002	0.004	0.000	0.000	0.006	297.357	0.844	0.1960337E-01	0.4391884	0.1118173E-05	2.594142
06272011	06	0.005	0.004	0.001	0.004	0.003	0.001	0.002	0.003	0.000	0.000	0.006	297.234	0.853	0.3832173E-01	0.7203790	0.1480433E-05	2.687172
06272011	07	0.007	0.005	0.002	0.003	0.003	0.001	0.002	0.002	0.001	0.000	0.006	297.945	0.867	0.1210439E-01	1.050535	0.9227537E-05	2.056325
06272011	08	0.006	0.009	0.004	0.003	0.003	0.001	0.001	0.002	0.003	0.000	0.006	299.979	0.803	0.7074952E-02	0.7682526	0.9224338E-05	1.920569
06272011	09	0.004	0.023	0.010	0.002	0.002	0.000	0.001	0.001	0.005	0.001	0.006	301.608	0.747	0.4753947E-02	0.7186151	0.2002830E-04	1.554852
06272011	10	0.003	0.029	0.017	0.001	0.002	0.000	0.001	0.001	0.007	0.001	0.006	303.185	0.686	0.2929330E-02	0.5849646	0.2016653E-04	1.462498
06272011	11	0.002	0.028	0.021	0.000	0.001	0.000	0.001	0.001	0.010	0.001	0.007	304.738	0.628	NaN	0.6411356	0.1950924E-01	-1.483291
06272011	12	0.001	0.020	0.018	0.000	0.001	0.000	0.000	0.001	0.010	0.000	0.007	306.187	0.576	0.2403438E-02	0.5037382	0.2559159E-02	-0.7058924
06272011	13	0.002	0.010	0.012	0.000	0.001	0.000	0.000	0.001	0.008	0.000	0.006	306.447	0.559	NaN	0.4279035	0.1049656E-01	-1.389701
06272011	14	0.002	0.002	0.005	0.000	0.000	0.000	0.000	0.000	0.008	0.000	0.005	305.928	0.569	0.2932549E-04	0.3930818	0.1136881E-02	-0.4612321
06272011	15	0.005	0.000	0.002	0.000	0.000	0.000	0.000	0.000	0.006	0.000	0.004	306.608	0.544	0.1740456E-04	0.2886003	0.7597521E-03	-0.4203751
06272011	16	0.008	0.000	0.002	0.000	0.000	0.000	0.000	0.000	0.006	0.000	0.004	307.030	0.504	0.2270937E-04	0.2574003	0.4767609E-03	-0.2676916
06272011	17	0.008	0.000	0.001	0.000	0.000	0.000	0.000	0.000	0.006	0.000	0.003	305.105	0.542	0.4339218E-04	0.2164502	0.2392148E-03	-0.4342998E-01
06272011	18	0.009	0.000	0.001	0.000	0.000	0.000	0.000	0.000	0.005	0.000	0.003	304.037	0.595	0.7498264E-04	0.2570694	0.2099101E-03	0.8801702E-01
06272011	19	0.010	0.000	0.001	0.001	0.000	0.000	0.000	0.000	0.004	0.000	0.003	302.750	0.606	0.1070499E-03	0.2647838	0.1899307E-03	0.1442961
06272011	20	0.010	0.000	0.001	0.001	0.000	0.000	0.000	0.000	0.004	0.000	0.002	300.909	0.702	0.2096891E-03	0.2333723	0.8018557E-04	0.4639530
06272011	21	0.009	0.000	0.000	0.001	0.001	0.000	0.000	0.000	0.003	0.000	0.002	300.534	0.659	NaN	0.2230982	0.7216974E-04	0.4901410
06272011	22	0.007	0.000	0.000	0.002	0.001	0.000	0.000	0.000	0.003	0.000	0.002	299.889	0.723	NaN	0.2671381	0.8122085E-04	0.5170683
06272011	23	0.004	0.000	0.000	0.001	0.001	0.000	0.000	0.000	0.002	0.000	0.002	298.536	0.862	NaN	0.4892288	0.1176430E-03	0.6189460
06272011	24	0.002	0.000	0.000	0.001	0.000	0.000	0.000	0.000	0.002	0.000	0.002	298.268	0.885	NaN	0.5988024	0.4803792E-03	0.9569936E-01
06282011	01	0.002	0.000	0.000	0.000	0.000	0.000	0.000	0.000	0.003	0.000	0.002	298.053	0.909	NaN	0.7272727	0.2976533E-03	0.3879866
06282011	02	0.002	0.001	0.001	0.001	0.001	0.000	0.000	0.000	0.005	0.000	0.003	297.968	0.911	0.9412766E-03	1.095658	0.2054077E-03	0.7270582
06282011	03	0.002	0.005	0.003	0.001	0.001	0.000	0.000	0.000	0.007	0.000	0.005	298.385	0.843	0.3767014E-03	1.068415	0.7876483E-03	0.1324075
06282011	04	0.002	0.008	0.003	0.001	0.002	0.000	0.000	0.001	0.008	0.000	0.006	297.939	0.867	0.1737010E-01	1.300796	0.2018165E-04	1.809252
06282011	05	0.003	0.007	0.003	0.001	0.002	0.000	0.001	0.001	0.007	0.000	0.006	297.693	0.892	0.1901650E-01	1.502481	0.1920059E-04	1.893495
06282011	06	0.004	0.006	0.002	0.001	0.003	0.000	0.001	0.001	0.006	0.000	0.006	297.674	0.900	0.2391422E-01	1.648457	0.1688281E-04	1.989633
06282011	07	0.005	0.006	0.002	0.001	0.003	0.000	0.001	0.001	0.005	0.000	0.006	298.534	0.901	0.2341360E-01	1.648457	0.1633771E-04	2.003886
06282011	08	0.005	0.014	0.006	0.001	0.003	0.000	0.001	0.001	0.004	0.000	0.005	299.666	0.865	0.8779645E-02	1.044185	0.1695426E-04	1.789498
06282011	09	0.003	0.025	0.013	0.001	0.002	0.000	0.001	0.001	0.006	0.000	0.005	300.457	0.825	0.4872561E-02	0.8142940	0.2073203E-04	1.594139
06282011	10	0.001	0.018	0.018	0.000	0.001	0.000	0.000	0.000	0.007	0.000	0.006	300.926	0.794	0.000000	0.9357790	0.1741881E-02	-0.2698452
06282011	11	0.001	0.011	0.016	0.000	0.001	0.000	0.000	0.000	0.009	0.000	0.007	300.651	0.770	0.000000	0.9912201	0.2006107E-02	-0.3061839
06282011	12	0.002	0.006	0.013	0.000	0.000	0.000	0.000	0.000	0.009	0.000	0.007	300.207	0.760	0.2449751E-03	0.9321194	0.8457400E-03	0.4223471E-01
06282011	13	0.001	0.003	0.010	0.000	0.000	0.000	0.000	0.000	0.009	0.000	0.007	300.369	0.744	0.1161098E-03	0.8530800	0.8484424E-03	0.2367422E-02
06282011	14	0.001	0.002	0.008	0.000	0.000	0.000	0.000	0.000	0.010	0.000	0.010	300.462	0.741	0.6091595E-04	1.295794	0.1038678E-02	0.9605473E-01
06282011	15	0.000	0.004	0.010	0.000	0.000	0.000	0.000	0.000	0.011	0.000	0.012	300.360	0.743	0.3415346E-04	1.672426	0.2171010E-02	-0.1133148
06282011	16	0.001	0.007	0.012	0.000	0.000	0.000	0.000	0.000	0.012	0.000	0.012	300.130	0.760	0.8964539E-04	1.701316	0.1442182E-02	0.7176487E-01
06282011	17	0.001	0.008	0.011	0.000	0.000	0.000	0.000	0.001	0.013	0.000	0.011	299.536	0.783	0.2577901E-03	1.464386	0.2275337E-02	-0.1913901
06282011	18	0.001	0.006	0.010	0.000	0.000	0.000	0.000	0.001	0.014	0.000	0.011	298.793	0.802	0.4746318E-03	1.587302	0.2445509E-02	-0.1877098
06282011	19	0.001	0.004	0.008	0.000	0.000	0.000	0.000	0.001	0.015	0.000	0.011	298.013	0.826	0.1050055E-02	1.890944	0.2508861E-02	-0.1227980
06282011	20	0.002	0.003	0.007	0.000	0.000	0.000	0.001	0.001	0.016	0.000	0.012	297.737	0.837	0.2476633E-02	2.229300	0.2541998E-02	-0.5700665E-01
06282011	21	0.002	0.003	0.006	0.000	0.000	0.000	0.001	0.001	0.017	0.000	0.012	297.462	0.853	0.4808724E-02	2.398422	0.2511541E-02	-0.2001464E-01
06282011	22	0.002	0.003	0.006	0.000	0.000	0.000	0.001	0.001	0.018	0.000	0.012	296.806	0.881	0.1410574E-01	2.991421	0.2454753E-02	0.8586957E-01
06282011	23	0.004	0.003	0.005	0.000	0.000	0.000	0.001	0.001	0.020	0.000	0.012	296.332	0.898	NaN	3.969364	0.1410398E-02	0.4493794
06282011	24	0.008	0.003	0.005	0.000	0.000	0.000	0.001	0.001	0.019	0.000	0.011	295.947	0.912	NaN	4.674912	0.3928679E-03	1.075527
06292011	01	0.011	0.003	0.005	0.000	0.000	0.000	0.001	0.001	0.018	0.000	0.011	295.613	0.926	NaN	6.202520	0.2657399E-03	1.368111
06292011	02	0.013	0.002	0.005	0.000	0.000	0.000	0.001	0.001	0.016	0.000	0.010	295.387	0.934	NaN	5.840564	0.1816943E-03	1.507114
06292011	03	0.015	0.002	0.005	0.000	0.000	0.000	0.001	0.001	0.015	0.000	0.009	295.276	0.933	NaN	5.454764	0.1177465E-03	1.665828
06292011	04	0.017	0.002	0.005	0.000	0.000	0.000	0.001	0.001	0.014	0.000	0.009	295.205	0.931	NaN	5.468701	0.1069625E-03	1.708653
06292011	05	0.017	0.003	0.005	0.000	0.000	0.000	0.001	0.001	0.013	0.000	0.008	295.144	0.927	NaN	5.027580	0.8732397E-04	1.760226
06292011	06	0.016	0.006	0.005	0.000	0.001	0.000	0.001	0.001	0.012	0.000	0.008	295.054	0.924	NaN	4.357570	0.8906353E-04	1.689544
06292011	07	0.012	0.014	0.006	0.000	0.001	0.000	0.002	0.001	0.011	0.000	0.008	295.557	0.914	NaN	4.054680	0.1532295E-03	1.422614
06292011	08	0.010	0.043	0.016	0.000	0.001	0.000	0.002	0.001	0.015	0.001	0.010	297.105	0.861	NaN	3.660696	0.4231333E-02	-0.6291350E-01
06292011	09	0.012	0.080	0.026	0.000	0.001	0.000	0.002	0.001	0.027	0.001	0.016	298.846	0.796	NaN	3.734025	0.1067914E-01	-0.4563592
06292011	10	0.010	0.069	0.024	0.000	0.001	0.000	0.001	0.001	0.030	0.001	0.017	300.561	0.734	NaN	2.712068	0.1129333E-01	-0.6195215
06292011	11	0.005	0.054	0.025	0.000	0.001	0.000	0.001	0.001	0.031	0.001	0.018	302.277	0.673	NaN	1.987150	0.1900149E-01	-0.9805570
06292011	12	0.003	0.034	0.023	0.000	0.001	0.000	0.001	0.001	0.028	0.000	0.018	303.775	0.616	0.2298117E-02	1.512224	0.4102182E-02	-0.4333988
06292011	13	0.002	0.023	0.021	0.000	0.001	0.000	0.001	0.001	0.026	0.000	0.020	304.974	0.573	0.8112192E-04	1.232301	0.3694487E-02	-0.4768375
06292011	14	0.001	0.017	0.020	0.000	0.001	0.000	0.001	0.001	0.027	0.000	0.023	305.631	0.548	0.3916025E-04	1.331183	0.2151750E-02	-0.2085541
06292011	15	0.001	0.017	0.020	0.000	0.001	0.000	0.001	0.001	0.029	0.000	0.025	305.609	0.544	0.3576279E-04	1.407231	0.2017007E-02	-0.1563422
06292011	16	0.001	0.019	0.019	0.000	0.001	0.000	0.001	0.001	0.032	0.000	0.025	305.252	0.554	0.5328655E-04	1.423697	0.3056855E-02	-0.3318573
06292011	17	0.002	0.023	0.017	0.000	0.001	0.000	0.001	0.001	0.035	0.000	0.025	304.658	0.564	0.1203418E-03	1.538934	0.4827586E-02	-0.4965099
06292011	18	0.004	0.024	0.014	0.000	0.001	0.000	0.001	0.002	0.037	0.000	0.025	304.015	0.579	0.9355545E-03	1.760757	0.4985513E-02	-0.4520103
06292011	19	0.005	0.016	0.009	0.001	0.001	0.000	0.001	0.002	0.038	0.000	0.024	303.045	0.632	0.8589029E-04	2.246193	0.4741415E-02	-0.3244609
06292011	20	0.006	0.012	0.005	0.002	0.001	0.000	0.001	0.002	0.038	0.000	0.023	303.691	0.453	0.1262456E-01	1.164685	0.3573988E-04	1.513055
06292011	21	0.005	0.010	0.003	0.003	0.001	0.000	0.001	0.002	0.036	0.000	0.021	303.153	0.451	0.1465178E-01	1.053512	0.2774289E-04	1.579488
06292011	22	0.004	0.006	0.002	0.004	0.001	0.000	0.001	0.001	0.031	0.000	0.020	302.358	0.515	0.000000	1.258992	0.4054949E-02	-0.5079623
06292011	23	0.002	0.005	0.002	0.003	0.001	0.000	0.001	0.001	0.025	0.000	0.018	300.442	0.642	0.000000	1.482439	0.3918832E-02	-0.4221798
06292011	24	0.001	0.004	0.002	0.003	0.002	0.000	0.001	0.001	0.022	0.000	0.018	299.875	0.686	0.000000	1.711462	0.3593289E-02	-0.3221248
07022011	01	0.028	0.022	0.005	0.003	0.002	0.002	0.004	0.009	0.031	0.001	0.029	297.747	0.761	0.3076971E-01	2.993020	0.7343698E-04	1.610195
07022011	02	0.025	0.018	0.003	0.003	0.002	0.002	0.004	0.009	0.026	0.001	0.027	297.274	0.802	0.3717977E-01	3.167769	0.5930644E-04	1.727652
07022011	03	0.024	0.015	0.002	0.003	0.002	0.002	0.005	0.010	0.021	0.001	0.025	296.882	0.825	0.3798473E-01	3.034397	0.4489152E-04	1.829908
07022011	04	0.023	0.013	0.002	0.003	0.002	0.002	0.005	0.010	0.016	0.001	0.023	296.720	0.827	0.3275007E-01	2.635990	0.3724210E-04	1.849910
07022011	05	0.021	0.011	0.002	0.003	0.002	0.002	0.005	0.010	0.012	0.001	0.022	296.396	0.846	0.3290004E-01	2.710574	0.3636802E-04	1.872342
07022011	06	0.021	0.010	0.002	0.003	0.003	0.002	0.005	0.011	0.010	0.001	0.021	296.254	0.855	0.3650028E-01	2.422743	0.2260910E-04	2.030024
07022011	07	0.024	0.009	0.003	0.002	0.003	0.002	0.005	0.011	0.007	0.001	0.020	297.101	0.862	0.3424460E-01	2.189007	0.1563944E-04	2.146026
07022011	08	0.023	0.007	0.004	0.002	0.003	0.002	0.006	0.011	0.004	0.001	0.019	299.677	0.771	0.1493824E-01	1.297491	0.8193162E-05	2.199653
07022011	09	0.028	0.016	0.009	0.001	0.003	0.001	0.004	0.007	0.013	0.001	0.018	301.767	0.689	0.8966267E-02	1.299428	0.2661911E-04	1.688559
07022011	10	0.024	0.026	0.011	0.000	0.003	0.001	0.002	0.005	0.020	0.001	0.018	303.982	0.595	NaN	1.597309	0.1857986E-03	0.9343466
07022011	11	0.013	0.048	0.012	0.000	0.002	0.001	0.002	0.003	0.026	0.000	0.018	305.986	0.512	NaN	1.275519	0.7360615E-03	0.2387727
07022011	12	0.004	0.067	0.014	0.000	0.001	0.000	0.001	0.002	0.029	0.000	0.020	307.737	0.448	0.7057190E-03	0.9670099	0.4912525E-02	-0.7058738
07022011	13	0.002	0.077	0.016	0.000	0.001	0.000	0.001	0.002	0.030	0.000	0.023	309.406	0.395	0.2127886E-04	0.7642686	0.3492488E-02	-0.6598889
07022011	14	0.001	0.048	0.015	0.000	0.001	0.000	0.001	0.002	0.028	0.000	0.030	307.029	0.461	0.6556511E-05	1.271356	0.7772886E-03	0.2136849
07022011	15	0.000	0.027	0.012	0.000	0.001	0.000	0.001	0.002	0.031	0.000	0.034	306.756	0.460	0.2682209E-05	1.469847	0.7051377E-03	0.3189982
07022011	16	0.001	0.030	0.013	0.000	0.001	0.000	0.001	0.002	0.037	0.000	0.034	307.891	0.410	0.9179115E-05	1.162227	0.1137607E-02	0.9298476E-02
07022011	17	0.001	0.027	0.013	0.000	0.001	0.000	0.001	0.002	0.039	0.000	0.034	306.801	0.429	0.1436472E-04	1.246003	0.1532799E-02	-0.8996615E-01
07022011	18	0.001	0.013	0.009	0.000	0.001	0.000	0.001	0.002	0.034	0.000	0.031	305.076	0.461	0.1639128E-04	1.277411	0.1359537E-02	-0.2706039E-01
07022011	19	0.001	0.008	0.007	0.001	0.001	0.000	0.001	0.002	0.033	0.000	0.029	304.367	0.491	0.000000	1.317429	0.1807293E-02	-0.1373012
07022011	20	0.001	0.009	0.007	0.001	0.001	0.000	0.001	0.002	0.038	0.000	0.030	302.677	0.509	0.000000	1.432766	0.3883915E-02	-0.4330944
07022011	21	0.003	0.010	0.008	0.001	0.001	0.001	0.002	0.003	0.043	0.000	0.031	300.979	0.545	0.000000	1.952683	0.5107420E-02	-0.4175699
07022011	22	0.005	0.012	0.008	0.001	0.001	0.001	0.002	0.003	0.047	0.000	0.031	299.701	0.595	0.1899600E-03	2.612786	0.4342456E-02	-0.2206317
07022011	23	0.010	0.013	0.008	0.001	0.001	0.001	0.002	0.004	0.048	0.001	0.030	298.791	0.647	0.2670413E-01	2.633236	0.1201319E-03	1.340832
07022011	24	0.022	0.013	0.008	0.001	0.001	0.001	0.002	0.004	0.043	0.001	0.028	298.068	0.703	0.2764606E-01	2.852857	0.1139757E-03	1.398468
07032011	01	0.031	0.013	0.008	0.001	0.001	0.001	0.003	0.005	0.038	0.001	0.026	297.432	0.765	0.2967554E-01	3.199138	0.1048648E-03	1.484403
07032011	02	0.038	0.012	0.007	0.001	0.001	0.001	0.003	0.005	0.035	0.001	0.025	297.014	0.804	0.3655648E-01	3.465008	0.9071443E-04	1.582028
07032011	03	0.042	0.012	0.007	0.001	0.001	0.001	0.003	0.005	0.032	0.001	0.024	296.778	0.821	0.4578316E-01	3.632700	0.7618993E-04	1.678332
07032011	04	0.044	0.012	0.007	0.001	0.001	0.001	0.003	0.005	0.030	0.001	0.023	296.602	0.830	0.5093145E-01	3.632090	0.6550619E-04	1.743874
07032011	05	0.046	0.012	0.006	0.001	0.001	0.001	0.003	0.006	0.028	0.002	0.022	296.462	0.837	0.5593753E-01	3.430482	0.4951849E-04	1.840588
07032011	06	0.048	0.012	0.006	0.001	0.002	0.001	0.004	0.006	0.026	0.002	0.022	296.402	0.843	0.6210333E-01	3.442107	0.4262343E-04	1.907176
07032011	07	0.049	0.012	0.006	0.001	0.002	0.001	0.004	0.007	0.022	0.002	0.021	297.318	0.849	0.5068618E-01	3.184913	0.3518168E-04	1.956781
07032011	08	0.041	0.011	0.007	0.001	0.002	0.002	0.004	0.008	0.018	0.001	0.021	299.582	0.787	0.1822764E-01	2.217373	0.3759855E-04	1.770668
07032011	09	0.067	0.042	0.015	0.000	0.003	0.002	0.004	0.009	0.016	0.001	0.021	301.200	0.731	NaN	2.720120	0.2782459E-04	1.990159
07032011	10	0.070	0.059	0.018	0.000	0.002	0.001	0.003	0.007	0.021	0.001	0.021	303.172	0.662	NaN	2.364444	0.4585045E-04	1.712386
07032011	11	0.046	0.067	0.022	0.000	0.002	0.001	0.002	0.005	0.028	0.001	0.021	305.552	0.563	NaN	1.942437	0.1103798E-03	1.245457
07032011	12	0.012	0.055	0.024	0.000	0.001	0.000	0.001	0.003	0.037	0.000	0.023	307.020	0.508	NaN	1.558601	0.9526746E-02	-0.7862098
07032011	13	0.003	0.029	0.019	0.000	0.001	0.000	0.001	0.002	0.035	0.000	0.025	307.872	0.490	0.1208186E-03	1.243958	0.5133427E-02	-0.6156017
07032011	14	0.002	0.006	0.011	0.000	0.001	0.000	0.001	0.001	0.030	0.000	0.023	306.697	0.524	0.4732609E-04	1.173997	0.3488831E-02	-0.4730128
07032011	15	0.003	0.000	0.006	0.000	0.000	0.000	0.000	0.001	0.025	0.000	0.017	306.076	0.540	0.1482368E-03	1.025129	0.4236744E-02	-0.6162537
07032011	16	0.004	0.000	0.004	0.000	0.000	0.000	0.000	0.000	0.023	0.000	0.012	306.344	0.531	0.7712841E-04	0.8415147	0.1602074E-02	-0.2796207
07032011	17	0.006	0.000	0.003	0.000	0.000	0.000	0.000	0.000	0.018	0.000	0.009	306.333	0.521	0.7671118E-04	0.6134969	0.8913570E-03	-0.1622393
07032011	18	0.007	0.000	0.002	0.000	0.000	0.000	0.000	0.000	0.013	0.000	0.007	305.851	0.516	0.6371737E-04	0.4771643	0.7066773E-03	-0.1705532
07032011	19	0.007	0.000	0.002	0.000	0.000	0.000	0.000	0.000	0.010	0.000	0.005	304.793	0.526	0.6777048E-04	0.3506311	0.4306429E-03	-0.8926680E-01
07032011	20	0.007	0.000	0.002	0.000	0.000	0.000	0.000	0.000	0.007	0.000	0.004	303.106	0.585	0.9167194E-04	0.3330558	0.3415145E-03	-0.1089217E-01
07032011	21	0.005	0.000	0.002	0.000	0.000	0.000	0.000	0.000	0.006	0.000	0.003	301.880	0.630	0.9107590E-04	0.2808989	0.2724054E-03	0.1333435E-01
07032011	22	0.005	0.000	0.001	0.000	0.000	0.000	0.000	0.000	0.005	0.000	0.003	300.949	0.670	0.1116395E-03	0.3174603	0.2957344E-03	0.3078770E-01
07032011	23	0.004	0.000	0.001	0.000	0.000	0.000	0.000	0.000	0.004	0.000	0.002	300.192	0.710	0.1043081E-03	0.2412545	0.1837703E-03	0.1182003
07032011	24	0.003	0.000	0.001	0.000	0.000	0.000	0.000	0.000	0.003	0.000	0.002	299.559	0.748	0.8279085E-04	0.2785515	0.2919521E-03	-0.2040603E-01
07042011	01	0.004	0.000	0.001	0.000	0.000	0.000	0.000	0.000	0.003	0.000	0.002	299.070	0.783	0.1545548E-03	0.3139718	0.1945322E-03	0.2078990
07042011	02	0.004	0.000	0.001	0.000	0.000	0.000	0.000	0.000	0.002	0.000	0.001	298.558	0.822	0.1571774E-03	0.1890359	0.6689710E-04	0.4511371
07042011	03	0.004	0.000	0.001	0.000	0.000	0.000	0.000	0.000	0.002	0.000	0.001	298.199	0.848	0.2002120E-03	0.2237137	0.6211354E-04	0.5565062
07042011	04	0.004	0.000	0.000	0.000	0.000	0.000	0.000	0.000	0.002	0.000	0.001	298.222	0.817	NaN	0.1890359	0.9851766E-04	0.2830303
07042011	05	0.003	0.000	0.000	0.000	0.000	0.000	0.000	0.000	0.002	0.000	0.001	297.855	0.847	NaN	0.2237137	0.1099878E-03	0.3083481
07042011	06	0.003	0.000	0.000	0.000	0.000	0.000	0.000	0.000	0.003	0.000	0.002	297.572	0.881	NaN	0.5509642	0.2368951E-03	0.3665673
07042011	07	0.003	0.000	0.000	0.000	0.000	0.000	0.000	0.000	0.004	0.000	0.002	298.208	0.875	NaN	0.5509642	0.2118629E-03	0.4150685
07042011	08	0.003	0.000	0.001	0.000	0.000	0.000	0.000	0.000	0.005	0.000	0.003	299.940	0.820	0.2022386E-03	0.5671077	0.3592977E-03	0.1982112
07042011	09	0.001	0.000	0.003	0.000	0.000	0.000	0.000	0.000	0.009	0.000	0.005	301.235	0.762	0.1660585E-03	0.7235890	0.8575130E-03	-0.7374878E-01
07042011	10	0.002	0.000	0.004	0.000	0.000	0.000	0.000	0.000	0.011	0.000	0.006	302.854	0.688	0.9274483E-04	0.6772009	0.1092580E-02	-0.2077358
07042011	11	0.004	0.000	0.005	0.000	0.000	0.000	0.000	0.000	0.011	0.000	0.006	304.683	0.617	0.6896257E-04	0.5454546	0.8506814E-03	-0.1930084
07042011	12	0.002	0.000	0.006	0.000	0.000	0.000	0.000	0.000	0.010	0.000	0.005	305.856	0.572	0.2563000E-04	0.3930818	0.1025826E-02	-0.4165908
07042011	13	0.004	0.000	0.003	0.000	0.000	0.000	0.000	0.000	0.007	0.000	0.004	305.208	0.580	0.2956390E-04	0.3236246	0.6768200E-03	-0.3204316
07042011	14	0.008	0.000	0.001	0.000	0.000	0.000	0.000	0.000	0.005	0.000	0.003	305.522	0.570	0.3963709E-04	0.2358491	0.2722685E-03	-0.6236327E-01
07042011	15	0.011	0.000	0.001	0.000	0.000	0.000	0.000	0.000	0.004	0.000	0.002	305.881	0.552	0.3463030E-04	0.1484781	0.1220380E-03	0.8516744E-01
07042011	16	0.008	0.000	0.001	0.000	0.000	0.000	0.000	0.000	0.004	0.000	0.002	304.313	0.617	0.5060434E-04	0.1818182	0.1419641E-03	0.1074589
07042011	17	0.005	0.000	0.001	0.000	0.000	0.000	0.000	0.000	0.003	0.000	0.002	303.184	0.659	0.4011393E-04	0.2051282	0.2443406E-03	-0.7597026E-01
07042011	18	0.004	0.000	0.001	0.000	0.000	0.000	0.000	0.000	0.003	0.000	0.002	302.268	0.704	0.4708767E-04	0.2333723	0.2785311E-03	-0.7682452E-01
07042011	19	0.003	0.000	0.000	0.000	0.000	0.000	0.000	0.000	0.000	0.000	0.000	301.078	0.768	NaN	0.1000000E-10	0.1000000E-13	0.000000
07042011	20	0.005	0.000	0.000	0.000	0.000	0.000	0.000	0.000	0.000	0.000	0.000	299.754	0.823	NaN	0.1000000E-10	0.1000000E-13	0.000000
07042011	21	0.007	0.000	0.000	0.000	0.000	0.000	0.000	0.000	0.000	0.000	0.000	298.859	0.858	NaN	0.1000000E-10	0.1000000E-13	0.000000
07042011	22	0.007	0.000	0.000	0.000	0.000	0.000	0.000	0.000	0.000	0.000	0.000	298.228	0.879	NaN	0.1000000E-10	0.1000000E-13	0.000000
07042011	23	0.007	0.000	0.000	0.000	0.000	0.000	0.000	0.000	0.000	0.000	0.000	297.758	0.895	NaN	0.1000000E-10	0.1000000E-13	0.000000
07042011	24	0.009	0.000	0.000	0.000	0.000	0.000	0.000	0.000	0.000	0.000	0.000	297.440	0.907	NaN	0.1000000E-10	0.1000000E-13	0.000000
07052011	01	0.010	0.000	0.000	0.000	0.000	0.000	0.000	0.000	0.000	0.000	0.000	297.213	0.914	NaN	0.1000000E-10	0.1000000E-13	0.000000
07052011	02	0.011	0.000	0.000	0.000	0.000	0.000	0.000	0.000	0.000	0.000	0.000	297.028	0.918	NaN	0.1000000E-10	0.1000000E-13	0.000000
07052011	03	0.012	0.000	0.001	0.000	0.000	0.000	0.000	0.000	0.000	0.000	0.000	296.871	0.921	0.000000	0.1000000E-10	0.5311094E-15	1.274816
07052011	04	0.011	0.000	0.001	0.000	0.000	0.000	0.000	0.000	0.000	0.000	0.000	296.712	0.926	0.000000	0.1000000E-10	0.5677910E-15	1.245811
07052011	05	0.010	0.000	0.001	0.000	0.000	0.000	0.000	0.000	0.000	0.000	0.000	296.554	0.925	0.000000	0.1000000E-10	0.6118802E-15	1.213334
07052011	06	0.009	0.000	0.001	0.000	0.000	0.000	0.001	0.000	0.001	0.000	0.001	296.377	0.931	NaN	0.8136273	0.1396520E-04	1.765378
07052011	07	0.008	0.001	0.001	0.000	0.001	0.000	0.001	0.000	0.002	0.000	0.002	296.972	0.920	NaN	1.096103	0.2842211E-04	1.586195
07052011	08	0.014	0.003	0.002	0.001	0.002	0.000	0.001	0.001	0.005	0.000	0.005	298.303	0.888	0.1754969E-01	1.203080	0.1225096E-04	1.992124
07052011	09	0.016	0.009	0.004	0.000	0.002	0.000	0.001	0.002	0.010	0.000	0.008	299.734	0.836	NaN	1.781165	0.8657641E-04	1.313305
07052011	10	0.006	0.014	0.008	0.000	0.001	0.000	0.001	0.001	0.017	0.000	0.010	300.878	0.787	NaN	1.964124	0.1289315E-02	0.1828101
07052011	11	0.002	0.004	0.007	0.000	0.000	0.000	0.000	0.001	0.015	0.000	0.009	301.968	0.745	0.1256347E-01	1.392758	0.2982895E-02	-0.3307624
07052011	12	0.001	0.001	0.006	0.000	0.000	0.000	0.000	0.000	0.012	0.000	0.007	303.200	0.691	0.6042719E-03	0.7600288	0.3711449E-03	0.3112866
07052011	13	0.002	0.001	0.005	0.000	0.000	0.000	0.000	0.000	0.010	0.000	0.006	304.672	0.617	0.5444348E-02	0.5454546	0.2722173E-04	1.301843
07052011	14	0.002	0.000	0.004	0.000	0.000	0.000	0.000	0.000	0.009	0.000	0.005	304.961	0.599	0.2789497E-04	0.4284490	0.1200703E-02	-0.4475363
07052011	15	0.001	0.000	0.003	0.000	0.000	0.000	0.000	0.000	0.008	0.000	0.004	304.350	0.619	0.2521276E-04	0.3636364	0.1010578E-02	-0.4439026
07052011	16	0.002	0.001	0.003	0.000	0.000	0.000	0.000	0.000	0.008	0.000	0.005	303.542	0.650	0.6425381E-04	0.4970179	0.1025721E-02	-0.3146573
07052011	17	0.002	0.001	0.002	0.000	0.000	0.000	0.000	0.000	0.009	0.000	0.006	302.323	0.697	0.4828572E-03	0.6704105	0.3744889E-03	0.2529019
07052011	18	0.002	0.001	0.002	0.000	0.000	0.000	0.000	0.000	0.010	0.000	0.006	301.165	0.747	0.1474875E-01	0.8356546	0.2949748E-04	1.452242
07052011	19	0.002	0.001	0.002	0.000	0.000	0.000	0.000	0.000	0.010	0.000	0.006	300.147	0.795	0.1823205E-01	1.029160	0.3646401E-04	1.450618
07052011	20	0.002	0.001	0.001	0.000	0.000	0.000	0.000	0.000	0.010	0.000	0.006	299.046	0.828	0.3041929E-01	1.195219	0.3041935E-04	1.594298
07052011	21	0.003	0.001	0.001	0.000	0.000	0.000	0.000	0.000	0.012	0.000	0.006	298.273	0.855	0.1256645E-02	1.431981	0.3806245E-03	0.5754405
07052011	22	0.007	0.001	0.001	0.000	0.000	0.000	0.000	0.000	0.012	0.000	0.006	297.691	0.875	0.3262877E-02	1.652892	0.1748386E-03	0.9756073
07052011	23	0.009	0.001	0.001	0.000	0.000	0.000	0.001	0.000	0.011	0.000	0.006	297.248	0.888	NaN	1.915095	0.1220510E-03	1.195649
07052011	24	0.011	0.001	0.001	0.000	0.000	0.000	0.001	0.000	0.010	0.000	0.006	296.907	0.895	NaN	2.114745	0.1049724E-03	1.304183
07062011	01	0.014	0.001	0.002	0.000	0.000	0.000	0.001	0.000	0.010	0.000	0.006	296.620	0.901	NaN	2.374920	0.8498290E-04	1.446317
07062011	02	0.016	0.001	0.002	0.000	0.000	0.000	0.001	0.000	0.009	0.000	0.005	296.384	0.907	NaN	2.310533	0.5338394E-04	1.636302
07062011	03	0.017	0.001	0.002	0.000	0.000	0.000	0.001	0.000	0.009	0.000	0.005	296.234	0.910	NaN	2.314713	0.4924189E-04	1.672162
07062011	04	0.017	0.001	0.002	0.000	0.000	0.000	0.001	0.000	0.009	0.000	0.005	296.127	0.911	NaN	2.315294	0.4881054E-04	1.676093
07062011	05	0.018	0.001	0.002	0.000	0.000	0.000	0.001	0.000	0.009	0.000	0.005	296.040	0.913	NaN	2.318610	0.4545017E-04	1.707692
07062011	06	0.019	0.002	0.002	0.000	0.000	0.000	0.001	0.000	0.009	0.000	0.005	295.978	0.918	NaN	2.622971	0.4224556E-04	1.793012
07062011	07	0.019	0.002	0.002	0.000	0.001	0.000	0.001	0.000	0.009	0.000	0.006	296.672	0.918	NaN	3.021018	0.5379945E-04	1.749375
07062011	08	0.010	0.006	0.003	0.000	0.001	0.000	0.001	0.000	0.010	0.000	0.006	297.802	0.855	NaN	1.843191	0.1414167E-03	1.115070
07062011	09	0.002	0.023	0.007	0.000	0.001	0.000	0.000	0.000	0.014	0.000	0.008	299.273	0.796	0.5878210E-03	1.387869	0.8788970E-03	0.1984106
07062011	10	0.002	0.027	0.009	0.000	0.001	0.000	0.000	0.001	0.013	0.000	0.009	300.738	0.741	0.9259522E-02	1.090887	0.2401644E-02	-0.3427289
07062011	11	0.003	0.033	0.010	0.000	0.001	0.000	0.000	0.001	0.014	0.000	0.009	302.265	0.680	NaN	0.9795287	0.6726364E-02	-0.8367632
07062011	12	0.002	0.037	0.010	0.000	0.001	0.000	0.000	0.000	0.014	0.000	0.009	303.759	0.616	0.000000	0.8046725	0.2857642E-02	-0.5503887
07062011	13	0.001	0.040	0.010	0.000	0.000	0.000	0.000	0.000	0.015	0.000	0.008	305.082	0.562	0.4325986E-02	0.6111535	0.4326038E-04	1.150060
07062011	14	0.001	0.038	0.009	0.000	0.000	0.000	0.000	0.000	0.015	0.000	0.008	305.732	0.539	0.4165411E-02	0.5772005	0.3748961E-04	1.187416
07062011	15	0.002	0.037	0.010	0.000	0.000	0.000	0.000	0.000	0.015	0.000	0.008	305.672	0.538	0.3606081E-04	0.5772006	0.1678942E-02	-0.4637089
07062011	16	0.003	0.035	0.010	0.000	0.000	0.000	0.000	0.000	0.015	0.000	0.008	305.372	0.543	0.4750490E-04	0.5772006	0.1384319E-02	-0.3799095
07062011	17	0.004	0.032	0.010	0.000	0.000	0.000	0.000	0.000	0.016	0.000	0.009	304.791	0.554	0.6729364E-04	0.6681514	0.1437010E-02	-0.3325850
07062011	18	0.006	0.028	0.009	0.000	0.000	0.000	0.000	0.001	0.015	0.000	0.009	304.157	0.562	NaN	0.7371210	0.3313451E-02	-0.6527418
07062011	19	0.008	0.023	0.008	0.000	0.000	0.000	0.000	0.001	0.015	0.000	0.009	303.327	0.570	NaN	0.7973828	0.1497215E-02	-0.2736174
07062011	20	0.012	0.018	0.007	0.000	0.000	0.000	0.001	0.001	0.015	0.000	0.009	301.459	0.642	NaN	1.019911	0.3140722E-03	0.5115326
07062011	21	0.015	0.015	0.005	0.000	0.001	0.000	0.001	0.002	0.013	0.000	0.009	300.375	0.667	NaN	0.9716796	0.1300491E-03	0.8734158
07062011	22	0.018	0.013	0.006	0.001	0.001	0.000	0.002	0.002	0.012	0.000	0.010	299.581	0.698	0.9957075E-02	0.9227088	0.2521767E-04	1.563360
07062011	23	0.020	0.014	0.007	0.001	0.001	0.001	0.002	0.003	0.010	0.000	0.011	298.937	0.734	0.1088983E-01	1.087229	0.2609885E-04	1.619700
07062011	24	0.020	0.015	0.008	0.001	0.002	0.001	0.003	0.004	0.009	0.000	0.012	298.340	0.779	0.1140356E-01	1.306551	0.2732960E-04	1.679493
07072011	01	0.020	0.017	0.010	0.001	0.002	0.001	0.004	0.005	0.008	0.001	0.013	297.818	0.825	0.1168680E-01	1.614909	0.3226840E-04	1.699371
07072011	02	0.018	0.020	0.011	0.001	0.002	0.001	0.004	0.007	0.007	0.001	0.014	297.466	0.855	0.1522136E-01	1.686101	0.2295017E-04	1.866098
07072011	03	0.016	0.021	0.012	0.001	0.003	0.001	0.004	0.008	0.006	0.001	0.015	297.289	0.865	0.1834780E-01	1.820886	0.2174528E-04	1.922918
07072011	04	0.014	0.021	0.011	0.001	0.003	0.001	0.004	0.009	0.005	0.001	0.015	297.202	0.870	0.2027100E-01	1.571988	0.1323545E-04	2.074710
07072011	05	0.013	0.022	0.010	0.001	0.003	0.001	0.004	0.009	0.004	0.001	0.015	297.089	0.880	0.2028668E-01	1.679995	0.1485991E-04	2.053292
07072011	06	0.013	0.023	0.008	0.001	0.003	0.001	0.004	0.009	0.002	0.001	0.015	297.051	0.890	0.1990062E-01	1.803090	0.1699522E-04	2.025691
07072011	07	0.014	0.022	0.009	0.001	0.003	0.002	0.004	0.010	0.001	0.001	0.014	297.993	0.890	0.5302715E-01	1.298792	0.2310909E-05	2.749757
07072011	08	0.016	0.025	0.016	0.001	0.003	0.002	0.004	0.010	0.001	0.001	0.013	300.734	0.807	0.1578271E-01	0.5553063	0.1055010E-05	2.721276
07072011	09	0.018	0.109	0.032	0.000	0.003	0.001	0.002	0.005	0.006	0.001	0.011	302.254	0.734	NaN	2.106530	0.1127460E-01	-0.7285334
07072011	10	0.003	0.157	0.036	0.000	0.001	0.000	0.001	0.002	0.016	0.000	0.013	303.760	0.652	0.1112103E-02	1.062734	0.3145138E-02	-0.4712151
07072011	11	0.001	0.095	0.025	0.000	0.001	0.000	0.001	0.001	0.014	0.000	0.013	304.951	0.598	0.4237890E-04	0.8714492	0.1840369E-02	-0.3246628
07072011	12	0.001	0.061	0.019	0.000	0.000	0.000	0.000	0.001	0.014	0.000	0.014	305.913	0.550	0.1037121E-04	0.8081037	0.9116018E-03	-0.5233802E-01
07072011	13	0.001	0.044	0.017	0.000	0.000	0.000	0.000	0.001	0.014	0.000	0.014	306.850	0.506	0.6794930E-05	0.6977662	0.7758905E-03	-0.4609049E-01
07072011	14	0.001	0.030	0.014	0.000	0.000	0.000	0.000	0.001	0.014	0.000	0.013	307.700	0.482	0.6914139E-05	0.5655457	0.9037532E-03	-0.2035821
07072011	15	0.001	0.017	0.011	0.000	0.000	0.000	0.000	0.001	0.013	0.000	0.011	307.280	0.483	0.8940697E-05	0.4580570	0.1300127E-02	-0.4530662
07072011	16	0.001	0.008	0.008	0.000	0.000	0.000	0.000	0.000	0.011	0.000	0.009	306.831	0.494	0.7450581E-05	0.4335392	0.2206130E-03	0.2933973
07072011	17	0.001	0.005	0.007	0.000	0.000	0.000	0.000	0.000	0.010	0.000	0.007	306.042	0.512	0.1513958E-04	0.3674300	0.6594217E-03	-0.2539886
07072011	18	0.002	0.004	0.005	0.000	0.000	0.000	0.000	0.000	0.010	0.000	0.006	305.120	0.532	0.4252017E-02	0.4207574	0.2126016E-04	1.296465
07072011	19	0.003	0.003	0.004	0.000	0.000	0.000	0.000	0.001	0.011	0.000	0.006	303.941	0.560	NaN	0.4507044	0.1011484E-02	-0.3510674
07072011	20	0.006	0.003	0.004	0.000	0.000	0.000	0.001	0.001	0.010	0.000	0.006	302.165	0.619	NaN	0.5629893	0.3112901E-03	0.2573349
07072011	21	0.009	0.003	0.004	0.000	0.000	0.000	0.001	0.001	0.009	0.000	0.007	300.873	0.636	NaN	0.6967804	0.3717431E-03	0.2728530
07072011	22	0.011	0.006	0.005	0.000	0.000	0.000	0.001	0.001	0.009	0.000	0.007	299.917	0.655	NaN	0.8043755	0.2623361E-03	0.4866007
07072011	23	0.013	0.009	0.006	0.000	0.001	0.000	0.001	0.001	0.009	0.000	0.007	299.128	0.690	NaN	0.9824090	0.1634571E-03	0.7788886
07072011	24	0.015	0.011	0.007	0.000	0.001	0.000	0.001	0.001	0.009	0.000	0.007	298.392	0.742	NaN	1.273872	0.1338679E-03	0.9784492
07082011	01	0.016	0.012	0.007	0.000	0.001	0.000	0.002	0.002	0.008	0.000	0.007	297.716	0.802	NaN	1.528336	0.6862274E-04	1.347751
07082011	02	0.017	0.012	0.008	0.000	0.001	0.000	0.002	0.002	0.008	0.000	0.007	297.252	0.843	NaN	2.086290	0.7395786E-04	1.450390
07082011	03	0.018	0.011	0.008	0.000	0.001	0.001	0.002	0.002	0.007	0.000	0.007	297.003	0.860	NaN	2.453308	0.5066078E-04	1.685080
07082011	04	0.017	0.009	0.007	0.000	0.001	0.001	0.002	0.002	0.007	0.000	0.007	296.829	0.869	NaN	2.481725	0.4892734E-04	1.705202
07082011	05	0.016	0.007	0.006	0.000	0.001	0.001	0.002	0.002	0.006	0.000	0.007	296.693	0.875	NaN	2.505161	0.5068033E-04	1.693996
07082011	06	0.015	0.005	0.004	0.000	0.001	0.001	0.002	0.002	0.006	0.000	0.007	296.662	0.881	NaN	2.123017	0.3986391E-04	1.726374
07082011	07	0.016	0.003	0.003	0.000	0.001	0.001	0.002	0.003	0.006	0.000	0.007	297.572	0.888	NaN	1.817806	0.2080532E-04	1.941373
07082011	08	0.013	0.003	0.002	0.000	0.001	0.001	0.002	0.003	0.006	0.000	0.007	300.114	0.804	NaN	0.9149216	0.2181489E-04	1.622631
07082011	09	0.006	0.007	0.008	0.000	0.001	0.000	0.001	0.001	0.010	0.000	0.007	301.954	0.734	NaN	1.114845	0.1591440E-02	-0.1545759
07082011	10	0.003	0.027	0.009	0.000	0.001	0.000	0.001	0.001	0.012	0.000	0.008	303.914	0.639	NaN	0.7864157	0.4786085E-02	-0.7843282
07082011	11	0.003	0.059	0.009	0.000	0.001	0.000	0.000	0.000	0.015	0.000	0.009	305.333	0.575	0.5888939E-04	0.7258427	0.1657075E-02	-0.3584996
07082011	12	0.007	0.052	0.008	0.000	0.001	0.000	0.000	0.000	0.015	0.000	0.008	306.578	0.527	0.8291006E-04	0.5793656	0.6889282E-03	-0.7522135E-01
07082011	13	0.007	0.027	0.007	0.000	0.001	0.000	0.000	0.001	0.017	0.000	0.010	305.987	0.531	NaN	0.7651587	0.1353591E-02	-0.2477361
07082011	14	0.005	0.009	0.006	0.000	0.001	0.000	0.001	0.001	0.021	0.000	0.012	305.309	0.568	NaN	0.9591057	0.1497848E-02	-0.1936013
07082011	15	0.010	0.006	0.006	0.001	0.001	0.000	0.001	0.001	0.020	0.000	0.012	305.646	0.544	0.6690860E-02	0.7896439	0.1717484E-04	1.662539
07082011	16	0.011	0.004	0.005	0.001	0.000	0.000	0.001	0.001	0.020	0.000	0.012	305.460	0.549	0.7508695E-02	0.7943954	0.1583011E-04	1.700553
07082011	17	0.010	0.001	0.005	0.000	0.000	0.000	0.001	0.001	0.019	0.000	0.011	305.285	0.540	NaN	0.7989510	0.5796920E-03	0.1393228
07082011	18	0.011	0.001	0.004	0.000	0.000	0.000	0.001	0.001	0.015	0.000	0.009	304.954	0.533	NaN	0.6206504	0.3456788E-03	0.2541743
07082011	19	0.011	0.000	0.002	0.001	0.000	0.000	0.001	0.001	0.014	0.000	0.008	303.990	0.587	0.8716702E-02	0.5616656	0.7747859E-05	1.860296
07082011	20	0.011	0.000	0.002	0.001	0.000	0.000	0.001	0.001	0.013	0.000	0.007	302.115	0.656	0.9887993E-02	0.5983257	0.8727845E-05	1.836031
07082011	21	0.009	0.000	0.001	0.001	0.000	0.000	0.001	0.001	0.012	0.000	0.007	301.169	0.671	0.1439548E-01	0.6186138	0.7277608E-05	1.929431
07082011	22	0.007	0.000	0.001	0.001	0.000	0.000	0.001	0.001	0.011	0.000	0.006	300.672	0.659	0.1193655E-01	0.4957616	0.6135013E-05	1.907457
07082011	23	0.005	0.000	0.001	0.001	0.000	0.000	0.001	0.001	0.011	0.000	0.006	299.884	0.706	0.1415098E-01	0.5896392	0.7067652E-05	1.921311
07082011	24	0.004	0.000	0.001	0.002	0.000	0.000	0.001	0.001	0.011	0.000	0.007	299.187	0.774	0.1882178E-01	0.8927463	0.1113668E-04	1.903973
07092011	01	0.002	0.000	0.001	0.001	0.000	0.000	0.001	0.001	0.011	0.000	0.007	298.645	0.831	0.2675813E-01	1.184113	0.1217008E-04	1.988100
07092011	02	0.002	0.000	0.001	0.002	0.000	0.000	0.001	0.001	0.012	0.000	0.007	298.251	0.873	0.2793962E-01	1.522659	0.1497822E-04	2.007142
07092011	03	0.002	0.000	0.001	0.002	0.001	0.000	0.001	0.001	0.012	0.000	0.008	298.210	0.872	0.3259671E-01	1.789425	0.1787122E-04	2.000559
07092011	04	0.004	0.000	0.001	0.002	0.002	0.000	0.001	0.001	0.011	0.000	0.009	298.220	0.866	0.3722554E-01	2.056191	0.2075342E-04	1.995974
07092011	05	0.004	0.001	0.001	0.002	0.003	0.000	0.001	0.001	0.010	0.000	0.009	298.037	0.906	0.4613996E-01	2.912752	0.2408850E-04	2.082494
07092011	06	0.003	0.002	0.001	0.002	0.004	0.000	0.001	0.002	0.008	0.000	0.009	298.017	0.915	0.4325551E-01	2.861162	0.2234227E-04	2.107415
07092011	07	0.003	0.004	0.002	0.002	0.004	0.000	0.001	0.002	0.006	0.000	0.008	298.823	0.903	0.000000	3.294515	0.2136463E-02	0.1880961
07092011	08	0.005	0.009	0.006	0.003	0.004	0.000	0.001	0.003	0.005	0.001	0.008	300.743	0.833	0.7780373E-02	1.042084	0.2080390E-04	1.699758
07092011	09	0.009	0.016	0.011	0.002	0.003	0.000	0.001	0.003	0.006	0.001	0.008	302.100	0.779	0.4844189E-02	0.8227993	0.2114208E-04	1.590146
07092011	10	0.011	0.020	0.015	0.002	0.003	0.000	0.001	0.002	0.008	0.001	0.009	303.895	0.707	0.4432380E-02	0.8835976	0.2687453E-04	1.516914
07092011	11	0.011	0.023	0.017	0.001	0.002	0.000	0.001	0.002	0.010	0.001	0.009	305.480	0.644	0.3194571E-02	0.6927817	0.2143341E-04	1.509505
07092011	12	0.009	0.024	0.022	0.001	0.001	0.000	0.001	0.002	0.011	0.001	0.009	306.681	0.592	0.2296746E-02	0.5799137	0.1899524E-04	1.484719
07092011	13	0.008	0.024	0.021	0.001	0.001	0.000	0.001	0.001	0.013	0.001	0.009	307.711	0.550	0.2284408E-02	0.5899910	0.1792384E-04	1.517414
07092011	14	0.004	0.010	0.013	0.001	0.001	0.000	0.001	0.001	0.017	0.001	0.011	306.546	0.578	0.4183114E-02	0.8058134	0.2211779E-04	1.561493
07092011	15	0.006	0.001	0.005	0.001	0.000	0.000	0.001	0.001	0.017	0.000	0.010	306.121	0.597	0.6644666E-02	0.7504677	0.1243482E-04	1.780693
07092011	16	0.010	0.000	0.003	0.001	0.000	0.000	0.000	0.001	0.012	0.000	0.007	305.999	0.600	0.5950928E-02	0.5141388	0.7515931E-05	1.835098
07092011	17	0.012	0.000	0.002	0.000	0.000	0.000	0.000	0.000	0.009	0.000	0.005	306.092	0.587	0.1034737E-03	0.4163197	0.2875500E-03	0.1607137
07092011	18	0.013	0.000	0.002	0.000	0.000	0.000	0.000	0.000	0.007	0.000	0.004	305.608	0.584	0.9566545E-04	0.3236246	0.2087811E-03	0.1903503
07092011	19	0.012	0.000	0.002	0.000	0.000	0.000	0.000	0.000	0.007	0.000	0.004	304.429	0.606	0.1337528E-03	0.3530450	0.2046629E-03	0.2367910
07092011	20	0.011	0.000	0.002	0.000	0.000	0.000	0.000	0.000	0.006	0.000	0.003	302.435	0.705	0.2575517E-03	0.3618818	0.1192006E-03	0.4822884
07092011	21	0.011	0.000	0.002	0.000	0.000	0.000	0.001	0.000	0.006	0.000	0.004	301.427	0.741	NaN	0.6419534	0.1121850E-03	0.7575687
07092011	22	0.010	0.000	0.002	0.000	0.000	0.000	0.001	0.000	0.005	0.000	0.003	300.912	0.744	NaN	0.5150206	0.7129390E-04	0.8587723
07092011	23	0.010	0.000	0.002	0.000	0.000	0.000	0.000	0.000	0.005	0.000	0.003	300.260	0.776	0.5111098E-03	0.4709576	0.1108676E-03	0.6281773
07092011	24	0.010	0.000	0.001	0.001	0.000	0.000	0.000	0.000	0.004	0.000	0.003	299.815	0.800	0.5722642E-03	0.5145798	0.1157662E-03	0.6478710
07102011	01	0.009	0.000	0.001	0.000	0.000	0.000	0.000	0.000	0.004	0.000	0.002	299.486	0.805	0.4891157E-03	0.3597122	0.6619988E-04	0.7350981
07102011	02	0.006	0.000	0.000	0.000	0.000	0.000	0.000	0.000	0.003	0.000	0.002	298.994	0.843	NaN	0.4219410	0.1680044E-03	0.3999311
07102011	03	0.005	0.000	0.000	0.000	0.000	0.000	0.000	0.000	0.002	0.000	0.001	298.704	0.869	NaN	0.2557545	0.8689077E-04	0.4688496
07102011	04	0.005	0.000	0.000	0.000	0.000	0.000	0.000	0.000	0.003	0.000	0.002	298.653	0.870	NaN	0.5115089	0.1874320E-03	0.4360096
07102011	05	0.005	0.000	0.000	0.000	0.000	0.000	0.000	0.000	0.005	0.000	0.003	298.561	0.882	NaN	0.8264462	0.2707710E-03	0.4846124
07102011	06	0.004	0.000	0.001	0.000	0.000	0.000	0.000	0.000	0.009	0.000	0.005	298.566	0.898	0.1621127E-02	1.639344	0.2866465E-03	0.7573236
07102011	07	0.006	0.000	0.002	0.001	0.000	0.000	0.000	0.000	0.011	0.000	0.006	299.450	0.888	0.1925230E-02	1.796407	0.2579372E-03	0.8428909
07102011	08	0.012	0.000	0.003	0.000	0.000	0.000	0.000	0.000	0.012	0.000	0.007	301.030	0.826	0.1622677E-02	1.394422	0.2144013E-03	0.8131669
07102011	09	0.005	0.001	0.006	0.000	0.000	0.000	0.000	0.001	0.011	0.000	0.007	302.314	0.778	NaN	1.189986	0.1741860E-02	-0.1654716
07102011	10	0.005	0.000	0.006	0.000	0.000	0.000	0.000	0.001	0.009	0.000	0.006	303.827	0.717	NaN	0.8127714	0.1772223E-02	-0.3385499
07102011	11	0.006	0.000	0.005	0.000	0.000	0.000	0.000	0.001	0.008	0.000	0.005	305.111	0.671	NaN	0.6066322	0.5890356E-03	0.1278394E-01
07102011	12	0.006	0.000	0.005	0.000	0.000	0.000	0.000	0.001	0.008	0.000	0.005	306.096	0.622	NaN	0.5095443	0.5915290E-03	-0.6479405E-01
07102011	13	0.008	0.000	0.004	0.000	0.000	0.000	0.000	0.001	0.007	0.000	0.005	307.366	0.566	NaN	0.4115514	0.3695324E-03	0.4677160E-01
07102011	14	0.010	0.000	0.002	0.000	0.000	0.000	0.000	0.001	0.005	0.000	0.003	307.473	0.566	NaN	0.2129088	0.7068642E-04	0.4788575
07102011	15	0.010	0.000	0.002	0.000	0.000	0.000	0.000	0.000	0.004	0.000	0.003	306.372	0.609	0.4518032E-04	0.2647838	0.2427327E-03	0.3776314E-01
07102011	16	0.010	0.000	0.002	0.000	0.000	0.000	0.000	0.000	0.004	0.000	0.002	305.332	0.646	0.5805492E-04	0.1988072	0.1170352E-03	0.2301155
07102011	17	0.008	0.000	0.002	0.000	0.000	0.000	0.000	0.000	0.003	0.000	0.002	304.216	0.676	0.6091595E-04	0.2185793	0.1501988E-03	0.1629426
07102011	18	0.009	0.000	0.002	0.000	0.000	0.000	0.000	0.000	0.003	0.000	0.002	303.140	0.716	0.1102090E-03	0.2496879	0.1149783E-03	0.3367818
07102011	19	0.011	0.000	0.002	0.000	0.000	0.000	0.000	0.000	0.003	0.000	0.002	301.759	0.770	0.2511740E-03	0.3012048	0.7635607E-04	0.5960184
07102011	20	0.013	0.000	0.002	0.000	0.000	0.000	0.000	0.000	0.003	0.000	0.002	300.520	0.812	0.5170703E-03	0.3597122	0.5345327E-04	0.8279809
07102011	21	0.014	0.000	0.003	0.000	0.000	0.000	0.000	0.000	0.003	0.000	0.002	299.784	0.836	0.8291006E-03	0.4219410	0.4344196E-04	0.9873424
07102011	22	0.014	0.000	0.003	0.000	0.000	0.000	0.000	0.000	0.003	0.000	0.002	299.311	0.854	0.1000822E-02	0.4474273	0.4085190E-04	1.039510
07102011	23	0.013	0.000	0.003	0.000	0.000	0.000	0.001	0.000	0.003	0.000	0.002	298.906	0.874	NaN	1.005398	0.3416887E-04	1.468707
07102011	24	0.011	0.000	0.002	0.000	0.000	0.000	0.001	0.000	0.002	0.000	0.002	298.656	0.894	NaN	0.9897230	0.3958109E-04	1.398026
07112011	01	0.009	0.000	0.001	0.000	0.000	0.000	0.001	0.000	0.002	0.000	0.001	298.505	0.910	NaN	0.6151582	0.1308765E-04	1.672125
07112011	02	0.006	0.000	0.001	0.000	0.000	0.000	0.001	0.000	0.001	0.000	0.001	298.478	0.905	NaN	0.6037503	0.2347254E-04	1.410297
07112011	03	0.004	0.000	0.001	0.000	0.000	0.000	0.000	0.000	0.001	0.000	0.001	298.381	0.914	0.3145933E-03	0.3636364	0.6698921E-04	0.7346625
07112011	04	0.004	0.000	0.001	0.000	0.000	0.000	0.000	0.000	0.001	0.000	0.001	298.349	0.922	0.3743172E-03	0.4081632	0.6428233E-04	0.8027423
07112011	05	0.004	0.000	0.000	0.000	0.000	0.000	0.000	0.000	0.001	0.000	0.001	298.304	0.929	NaN	0.4672897	0.1230458E-03	0.5795195
07112011	06	0.005	0.000	0.000	0.000	0.000	0.000	0.000	0.000	0.002	0.000	0.001	298.354	0.928	NaN	0.4672897	0.9242761E-04	0.7037845
07112011	07	0.007	0.000	0.001	0.000	0.000	0.000	0.000	0.000	0.002	0.000	0.001	299.175	0.922	0.6613135E-03	0.4081632	0.3028279E-04	1.129638
07112011	08	0.007	0.000	0.001	0.000	0.000	0.000	0.000	0.000	0.002	0.000	0.001	300.603	0.864	0.2208948E-03	0.2386635	0.4165475E-04	0.7581214
07112011	09	0.001	0.000	0.001	0.000	0.000	0.000	0.000	0.000	0.003	0.000	0.002	301.225	0.845	0.8469820E-04	0.4474273	0.4714797E-03	-0.2274050E-01
07112011	10	0.000	0.000	0.000	0.000	0.000	0.000	0.000	0.000	0.000	0.000	0.000	302.074	0.824	NaN	0.1000000E-10	0.000000	NaN
07112011	11	0.004	0.000	0.000	0.000	0.000	0.000	0.000	0.000	0.000	0.000	0.000	303.022	0.799	NaN	0.1000000E-10	0.1000000E-13	0.000000
07112011	12	0.004	0.000	0.001	0.000	0.000	0.000	0.000	0.000	0.000	0.000	0.000	303.830	0.781	0.000000	0.1000000E-10	0.3021124E-14	0.5198315
07112011	13	0.005	0.000	0.001	0.000	0.000	0.000	0.000	0.000	0.001	0.000	0.001	304.637	0.743	0.2104044E-04	0.1342282	0.1292009E-03	0.1657811E-01
07112011	14	0.005	0.000	0.001	0.000	0.000	0.000	0.000	0.000	0.001	0.000	0.001	304.935	0.746	0.2092123E-04	0.1392758	0.1301196E-03	0.2953268E-01
07112011	15	0.004	0.000	0.001	0.000	0.000	0.000	0.000	0.000	0.002	0.000	0.001	304.594	0.759	0.2402067E-04	0.1447178	0.1247520E-03	0.6447442E-01
07112011	16	0.003	0.000	0.001	0.000	0.000	0.000	0.000	0.000	0.003	0.000	0.001	304.279	0.763	0.2592802E-04	0.1447178	0.1217937E-03	0.7489707E-01
07112011	17	0.003	0.000	0.002	0.000	0.000	0.000	0.000	0.000	0.003	0.000	0.002	303.411	0.763	0.3820658E-04	0.2894356	0.3711192E-03	-0.1079614
07112011	18	0.003	0.000	0.002	0.000	0.000	0.000	0.000	0.000	0.004	0.000	0.002	303.480	0.772	0.5465746E-04	0.3012048	0.2722093E-03	0.4395902E-01
07112011	19	0.003	0.000	0.002	0.000	0.000	0.000	0.000	0.000	0.004	0.000	0.002	302.689	0.786	0.7450581E-04	0.3278689	0.2481016E-03	0.1210706
07112011	20	0.005	0.000	0.001	0.000	0.000	0.000	0.000	0.000	0.004	0.000	0.002	301.416	0.836	0.2276301E-03	0.4219410	0.1277570E-03	0.5188669
07112011	21	0.007	0.000	0.001	0.000	0.000	0.000	0.000	0.000	0.004	0.000	0.003	300.676	0.852	0.4506111E-03	0.6711410	0.1714668E-03	0.5926336
07112011	22	0.009	0.000	0.001	0.000	0.000	0.000	0.000	0.000	0.005	0.000	0.003	300.186	0.862	0.8498430E-03	0.7159904	0.1028164E-03	0.8428447
07112011	23	0.009	0.000	0.001	0.000	0.000	0.000	0.001	0.000	0.005	0.000	0.003	299.788	0.873	NaN	0.8886635	0.6753049E-04	1.119237
07112011	24	0.008	0.000	0.001	0.000	0.000	0.000	0.001	0.000	0.005	0.000	0.003	299.414	0.888	NaN	1.045037	0.7359858E-04	1.152262
07122011	01	0.008	0.000	0.001	0.000	0.000	0.000	0.001	0.000	0.005	0.000	0.003	299.041	0.905	NaN	1.283137	0.7028699E-04	1.261398
07122011	02	0.007	0.000	0.001	0.000	0.000	0.000	0.001	0.000	0.006	0.000	0.004	298.812	0.903	NaN	1.438972	0.1271571E-03	1.053712
07122011	03	0.006	0.000	0.001	0.000	0.000	0.000	0.001	0.000	0.006	0.000	0.004	298.531	0.919	NaN	1.773028	0.1493325E-03	1.074561
07122011	04	0.006	0.000	0.001	0.000	0.001	0.000	0.001	0.000	0.006	0.000	0.004	298.347	0.927	NaN	2.085676	0.1078010E-03	1.286624
07122011	05	0.006	0.000	0.001	0.000	0.001	0.000	0.001	0.000	0.007	0.000	0.004	298.182	0.934	NaN	2.106907	0.9138012E-04	1.362794
07122011	06	0.003	0.000	0.001	0.000	0.001	0.000	0.001	0.000	0.008	0.000	0.005	297.991	0.942	NaN	2.760223	0.2619570E-03	1.022714
07122011	07	0.002	0.000	0.001	0.000	0.000	0.000	0.001	0.000	0.008	0.000	0.006	298.359	0.943	0.1601255E-01	3.232580	0.1833328E-02	0.2463090
07122011	08	0.001	0.000	0.001	0.000	0.000	0.000	0.000	0.000	0.009	0.000	0.009	299.695	0.899	0.7150173E-03	2.966137	0.1784984E-02	0.2205569
07122011	09	0.001	0.000	0.002	0.000	0.000	0.000	0.000	0.000	0.011	0.000	0.012	301.188	0.841	0.2004504E-03	2.586207	0.2319143E-02	0.4733576E-01
07122011	10	0.001	0.001	0.004	0.000	0.000	0.000	0.000	0.000	0.012	0.000	0.011	302.854	0.766	0.1158714E-03	1.602082	0.1079540E-02	0.1714461
07122011	11	0.001	0.001	0.006	0.000	0.000	0.000	0.000	0.000	0.011	0.000	0.010	304.524	0.709	0.5257130E-04	1.123929	0.6632771E-03	0.2290439
07122011	12	0.001	0.001	0.006	0.000	0.000	0.000	0.000	0.000	0.010	0.000	0.009	306.350	0.641	0.2336502E-04	0.7679416	0.3651116E-03	0.3229026
07122011	13	0.001	0.001	0.007	0.000	0.000	0.000	0.000	0.000	0.010	0.000	0.009	307.848	0.581	0.1245737E-04	0.6159552	0.2261094E-03	0.4352305
07122011	14	0.001	0.002	0.008	0.000	0.000	0.000	0.000	0.000	0.010	0.000	0.009	308.330	0.567	0.1114607E-04	0.5941156	0.2044225E-03	0.4633422
07122011	15	0.001	0.004	0.009	0.000	0.000	0.000	0.000	0.000	0.011	0.000	0.010	307.836	0.581	0.1263618E-04	0.6873329	0.2392505E-03	0.4583143
07122011	16	0.001	0.005	0.011	0.000	0.000	0.000	0.000	0.000	0.012	0.000	0.010	307.077	0.602	0.2217293E-04	0.7256297	0.3684022E-03	0.2943928
07122011	17	0.001	0.006	0.010	0.000	0.000	0.000	0.000	0.000	0.012	0.000	0.010	306.017	0.629	0.3057718E-04	0.8103428	0.4619944E-03	0.2440321
07122011	18	0.001	0.005	0.009	0.000	0.000	0.000	0.000	0.000	0.012	0.000	0.012	304.792	0.659	0.2092123E-04	1.133909	0.6178612E-03	0.2636872
07122011	19	0.001	0.004	0.008	0.000	0.000	0.000	0.000	0.000	0.013	0.000	0.011	303.452	0.690	0.6163120E-04	1.125297	0.7605693E-03	0.1701285
07122011	20	0.002	0.003	0.007	0.000	0.000	0.000	0.000	0.000	0.015	0.000	0.010	301.617	0.754	0.5429983E-03	1.308983	0.9285391E-03	0.1491337
07122011	21	0.002	0.002	0.005	0.000	0.000	0.000	0.000	0.000	0.017	0.000	0.009	300.576	0.787	0.4861951E-03	1.475410	0.1047595E-02	0.1487192
07122011	22	0.005	0.002	0.005	0.000	0.000	0.000	0.000	0.000	0.016	0.000	0.009	299.946	0.810	0.9418726E-03	1.618705	0.6553835E-03	0.3926722
07122011	23	0.007	0.001	0.004	0.000	0.000	0.000	0.000	0.000	0.014	0.000	0.007	299.467	0.839	0.1798689E-02	1.476793	0.2592057E-03	0.7556751
07122011	24	0.007	0.001	0.003	0.000	0.000	0.000	0.000	0.000	0.013	0.000	0.007	298.976	0.879	0.3094137E-02	1.928375	0.2399985E-03	0.9049830
07132011	01	0.005	0.000	0.001	0.000	0.000	0.000	0.000	0.000	0.011	0.000	0.006	298.565	0.916	0.3375471E-02	2.448980	0.2497241E-03	0.9915248
07132011	02	0.003	0.000	0.001	0.000	0.000	0.000	0.000	0.000	0.010	0.000	0.005	298.361	0.920	0.2245724E-02	2.040816	0.2641508E-03	0.8879520
07132011	03	0.002	0.000	0.001	0.000	0.000	0.000	0.000	0.000	0.010	0.000	0.005	298.187	0.929	0.2190471E-02	2.336448	0.3230711E-03	0.8592581
07132011	04	0.003	0.000	0.001	0.000	0.000	0.000	0.000	0.000	0.010	0.000	0.005	297.943	0.951	0.4865706E-02	3.311258	0.2310285E-03	1.156327
07132011	05	0.003	0.000	0.001	0.000	0.001	0.000	0.000	0.000	0.011	0.000	0.006	297.788	0.960	0.9570718E-02	5.042017	0.2425571E-03	1.317790
07132011	06	0.004	0.001	0.001	0.000	0.002	0.000	0.001	0.000	0.011	0.000	0.007	297.734	0.955	NaN	5.906713	0.2496215E-03	1.374064
07132011	07	0.006	0.001	0.001	0.000	0.003	0.000	0.001	0.001	0.010	0.000	0.007	298.449	0.946	NaN	4.288444	0.1024851E-03	1.621639
07132011	08	0.009	0.004	0.003	0.001	0.004	0.000	0.001	0.001	0.008	0.000	0.008	300.128	0.901	0.2502728E-01	2.310909	0.2328999E-04	1.996614
07132011	09	0.010	0.009	0.005	0.001	0.003	0.000	0.001	0.001	0.007	0.000	0.006	301.674	0.846	0.9885550E-02	1.145607	0.1567574E-04	1.863808
07132011	10	0.008	0.010	0.006	0.000	0.001	0.000	0.000	0.001	0.007	0.000	0.005	303.091	0.791	NaN	1.137125	0.4061270E-03	0.4471462
07132011	11	0.007	0.006	0.007	0.000	0.001	0.000	0.000	0.000	0.007	0.000	0.004	304.401	0.744	0.1954436E-03	0.5539738	0.2397722E-03	0.3636904
07132011	12	0.005	0.004	0.009	0.000	0.000	0.000	0.000	0.000	0.009	0.000	0.005	305.676	0.684	0.7349253E-04	0.5464481	0.6082989E-03	-0.4656811E-01
07132011	13	0.001	0.002	0.009	0.000	0.000	0.000	0.000	0.000	0.011	0.000	0.006	306.449	0.650	0.3930986E-02	0.5964214	0.3537910E-04	1.226806
07132011	14	0.001	0.002	0.009	0.000	0.000	0.000	0.000	0.000	0.012	0.000	0.006	306.545	0.650	0.3534555E-04	0.5964215	0.1336280E-02	-0.3503441
07132011	15	0.001	0.001	0.008	0.000	0.000	0.000	0.000	0.000	0.011	0.000	0.006	305.793	0.667	0.4563868E-02	0.6349207	0.3651121E-04	1.240293
07132011	16	0.002	0.001	0.006	0.000	0.000	0.000	0.000	0.000	0.009	0.000	0.006	303.467	0.728	0.5775690E-03	0.7478791	0.3299892E-03	0.3553317
07132011	17	0.002	0.000	0.005	0.000	0.000	0.000	0.000	0.000	0.009	0.000	0.006	302.841	0.771	0.8606911E-03	0.8771349	0.3144630E-03	0.4454969
07132011	18	0.002	0.001	0.005	0.000	0.000	0.000	0.000	0.000	0.010	0.000	0.006	301.649	0.801	0.1064652E-01	1.029160	0.5323251E-04	1.286306
07132011	19	0.004	0.001	0.005	0.000	0.000	0.000	0.000	0.000	0.010	0.000	0.006	300.809	0.836	0.4906654E-03	1.265823	0.5891525E-03	0.3321452
07132011	20	0.006	0.001	0.005	0.000	0.000	0.000	0.000	0.000	0.009	0.000	0.005	299.543	0.858	0.1103699E-02	1.193317	0.2436111E-03	0.6900588
07132011	21	0.008	0.002	0.005	0.000	0.000	0.000	0.001	0.000	0.008	0.000	0.005	298.731	0.889	NaN	2.348819	0.3435996E-03	0.8347970
07132011	22	0.008	0.003	0.004	0.000	0.000	0.000	0.001	0.001	0.008	0.000	0.005	298.230	0.906	NaN	2.416390	0.1462918E-03	1.217947
07132011	23	0.009	0.003	0.003	0.000	0.000	0.000	0.001	0.001	0.007	0.000	0.005	297.941	0.909	NaN	2.165227	0.1146076E-03	1.276290
07132011	24	0.010	0.003	0.004	0.000	0.000	0.000	0.001	0.001	0.007	0.000	0.005	297.709	0.916	NaN	2.768015	0.1217678E-03	1.356636
07142011	01	0.010	0.003	0.004	0.000	0.001	0.000	0.001	0.001	0.006	0.000	0.005	297.589	0.912	NaN	2.456265	0.1093408E-03	1.351493
07142011	02	0.010	0.004	0.004	0.000	0.001	0.000	0.001	0.001	0.006	0.000	0.005	297.462	0.916	NaN	2.786120	0.1099091E-03	1.403966
07142011	03	0.010	0.004	0.004	0.000	0.001	0.000	0.002	0.001	0.005	0.000	0.005	297.357	0.919	NaN	2.789398	0.9329358E-04	1.475659
07142011	04	0.009	0.004	0.004	0.000	0.001	0.000	0.002	0.001	0.006	0.000	0.005	297.249	0.925	NaN	3.225039	0.9514479E-04	1.530150
07142011	05	0.008	0.004	0.003	0.000	0.001	0.000	0.002	0.001	0.006	0.000	0.005	297.180	0.920	NaN	2.478337	0.8298843E-04	1.475143
07142011	06	0.009	0.003	0.003	0.000	0.001	0.000	0.002	0.001	0.006	0.000	0.006	297.081	0.932	NaN	3.271632	0.1251062E-03	1.417486
07142011	07	0.009	0.003	0.003	0.000	0.001	0.000	0.002	0.001	0.006	0.000	0.006	297.940	0.907	NaN	2.500650	0.1329579E-03	1.274339
07142011	08	0.010	0.005	0.006	0.001	0.002	0.000	0.002	0.001	0.007	0.000	0.007	299.884	0.855	0.1236212E-01	1.432638	0.2204042E-04	1.812917
07142011	09	0.027	0.031	0.011	0.000	0.002	0.000	0.002	0.001	0.013	0.000	0.010	301.466	0.810	NaN	2.756773	0.1256467E-03	1.341250
07142011	10	0.041	0.054	0.015	0.000	0.001	0.000	0.002	0.001	0.016	0.000	0.010	303.149	0.749	NaN	2.329729	0.7273748E-04	1.505547
07142011	11	0.033	0.055	0.020	0.000	0.001	0.000	0.001	0.001	0.019	0.000	0.011	304.661	0.692	NaN	2.180477	0.1594247E-03	1.135996
07142011	12	0.009	0.016	0.015	0.000	0.000	0.000	0.001	0.001	0.021	0.000	0.012	304.666	0.681	NaN	1.603688	0.4079720E-02	-0.4055106
07142011	13	0.003	0.002	0.008	0.000	0.000	0.000	0.000	0.000	0.014	0.000	0.009	305.646	0.651	0.6852150E-03	0.8636103	0.3523958E-03	0.3892870
07142011	14	0.002	0.001	0.005	0.000	0.000	0.000	0.000	0.000	0.009	0.000	0.007	305.746	0.652	0.6133318E-04	0.6027593	0.6083431E-03	-0.4004676E-02
07142011	15	0.002	0.000	0.004	0.000	0.000	0.000	0.000	0.000	0.008	0.000	0.005	305.004	0.675	0.5841255E-04	0.5464481	0.1012879E-02	-0.2680088
07142011	16	0.002	0.001	0.004	0.000	0.000	0.000	0.000	0.000	0.006	0.000	0.004	303.906	0.712	0.5924702E-04	0.4825091	0.8625717E-03	-0.2522897
07142011	17	0.002	0.001	0.003	0.000	0.000	0.000	0.000	0.000	0.005	0.000	0.004	302.994	0.749	0.2686381E-03	0.5291781	0.2981081E-03	0.2492281
07142011	18	0.002	0.001	0.004	0.000	0.000	0.000	0.000	0.000	0.006	0.000	0.004	302.169	0.795	0.1329184E-03	0.6861064	0.7356820E-03	-0.3029867E-01
07142011	19	0.002	0.002	0.005	0.000	0.000	0.000	0.000	0.000	0.007	0.000	0.005	300.974	0.852	0.1544356E-02	1.093082	0.2795101E-03	0.5922552
07142011	20	0.001	0.003	0.006	0.000	0.000	0.000	0.000	0.000	0.009	0.000	0.005	300.034	0.896	0.6581545E-03	1.639344	0.6194850E-03	0.4226394
07142011	21	0.002	0.003	0.006	0.000	0.000	0.000	0.000	0.000	0.009	0.000	0.005	299.486	0.918	0.1076996E-02	2.040816	0.4801630E-03	0.6284152
07142011	22	0.003	0.004	0.006	0.000	0.000	0.000	0.000	0.000	0.009	0.000	0.005	298.796	0.940	0.2786517E-02	2.732240	0.3103058E-03	0.9447290
07142011	23	0.004	0.004	0.006	0.000	0.000	0.000	0.000	0.001	0.010	0.000	0.006	298.214	0.960	NaN	6.182636	0.1288869E-02	0.6809649
07142011	24	0.007	0.005	0.005	0.000	0.000	0.000	0.001	0.001	0.011	0.000	0.007	297.883	0.970	NaN	10.38376	0.4343986E-03	1.378466
07152011	01	0.010	0.006	0.005	0.000	0.001	0.000	0.001	0.002	0.011	0.000	0.008	297.703	0.971	NaN	11.08361	0.2023660E-03	1.738544
07152011	02	0.011	0.006	0.005	0.000	0.001	0.000	0.001	0.003	0.012	0.000	0.010	297.591	0.968	NaN	12.15417	0.2213357E-03	1.739674
07152011	03	0.012	0.007	0.005	0.000	0.001	0.001	0.002	0.004	0.014	0.000	0.012	297.527	0.963	NaN	9.660174	0.1193210E-03	1.908268
07152011	04	0.013	0.007	0.005	0.001	0.002	0.001	0.002	0.004	0.017	0.001	0.014	297.476	0.960	0.7485634E-01	8.257218	0.7054244E-04	2.068383
07152011	05	0.013	0.006	0.004	0.001	0.002	0.001	0.002	0.004	0.020	0.001	0.016	297.441	0.956	0.7969129E-01	9.829207	0.9546073E-04	2.012694
07152011	06	0.014	0.005	0.003	0.001	0.002	0.001	0.003	0.004	0.023	0.001	0.018	297.428	0.952	0.8195990E-01	9.086978	0.8609553E-04	2.023439
07152011	07	0.014	0.004	0.003	0.001	0.003	0.001	0.003	0.004	0.025	0.001	0.019	298.255	0.935	0.7378465E-01	8.075217	0.7771063E-04	2.016674
07152011	08	0.012	0.006	0.006	0.001	0.003	0.001	0.003	0.003	0.029	0.001	0.020	299.512	0.873	0.3521138E-01	4.363475	0.7176078E-04	1.783945
07152011	09	0.004	0.006	0.011	0.000	0.001	0.000	0.001	0.001	0.026	0.000	0.015	300.119	0.844	NaN	3.369221	0.4267341E-02	-0.1026278
07152011	10	0.002	0.002	0.008	0.000	0.001	0.000	0.001	0.001	0.020	0.000	0.011	301.467	0.811	NaN	2.111786	0.2688423E-02	-0.1048476
07152011	11	0.002	0.001	0.006	0.000	0.000	0.000	0.000	0.000	0.015	0.000	0.008	301.020	0.793	0.3764033E-03	1.311476	0.1001145E-02	0.1172633
07152011	12	0.004	0.000	0.005	0.000	0.000	0.000	0.000	0.001	0.014	0.000	0.008	302.296	0.776	NaN	1.295862	0.1398070E-02	-0.3297029E-01
07152011	13	0.002	0.000	0.005	0.000	0.000	0.000	0.000	0.001	0.012	0.000	0.007	303.165	0.741	NaN	0.8826687	0.2500987E-02	-0.4523138
07152011	14	0.002	0.000	0.005	0.000	0.000	0.000	0.000	0.000	0.009	0.000	0.006	302.758	0.747	0.7185936E-03	0.8077297	0.3297591E-03	0.3890693
07152011	15	0.002	0.000	0.004	0.000	0.000	0.000	0.000	0.000	0.008	0.000	0.006	302.106	0.773	0.3315806E-03	0.8506554	0.5486227E-03	0.1904799
07152011	16	0.001	0.001	0.003	0.000	0.000	0.000	0.000	0.000	0.008	0.000	0.007	301.591	0.800	0.1561046E-03	1.155754	0.7833799E-03	0.1688929
07152011	17	0.001	0.001	0.003	0.000	0.000	0.000	0.000	0.000	0.007	0.000	0.007	300.943	0.823	0.1390576E-03	1.313651	0.9657826E-03	0.1336007
07152011	18	0.001	0.001	0.003	0.000	0.000	0.000	0.000	0.000	0.006	0.000	0.007	300.144	0.859	0.1790524E-03	1.711491	0.1493951E-02	0.5903823E-01
07152011	19	0.001	0.001	0.003	0.000	0.000	0.000	0.000	0.000	0.006	0.000	0.008	299.771	0.879	0.2331138E-03	2.368026	0.2411936E-02	-0.7979319E-02
07152011	20	0.001	0.001	0.002	0.000	0.000	0.000	0.000	0.000	0.006	0.000	0.007	298.807	0.909	0.5890727E-03	2.592593	0.1836281E-02	0.1497951
07152011	21	0.001	0.001	0.002	0.000	0.000	0.000	0.000	0.000	0.006	0.000	0.006	298.226	0.945	0.2437055E-02	3.897402	0.1341376E-02	0.4632245
07152011	22	0.001	0.002	0.001	0.000	0.000	0.000	0.000	0.000	0.008	0.000	0.007	297.970	0.958	0.5727351E-02	5.684823	0.1324115E-02	0.6327912
07152011	23	0.001	0.003	0.001	0.000	0.000	0.000	0.000	0.000	0.009	0.000	0.009	297.822	0.960	0.4937232E-02	7.350608	0.2335364E-02	0.4979686
07152011	24	0.001	0.002	0.001	0.000	0.001	0.000	0.000	0.000	0.008	0.000	0.008	297.680	0.967	0.000000	8.914729	0.2698911E-02	0.5189196
07162011	01	0.001	0.001	0.001	0.000	0.001	0.000	0.001	0.000	0.006	0.000	0.006	297.578	0.970	0.1448298E-01	6.711664	0.1846898E-02	0.5603872
07162011	02	0.002	0.001	0.001	0.000	0.001	0.000	0.001	0.000	0.004	0.000	0.003	297.689	0.958	NaN	2.674792	0.2222429E-03	1.080462
07162011	03	0.003	0.000	0.001	0.000	0.001	0.000	0.001	0.000	0.001	0.000	0.002	297.465	0.966	NaN	2.767697	0.1548033E-03	1.252338
07162011	04	0.003	0.000	0.001	0.000	0.001	0.000	0.001	0.000	0.001	0.000	0.001	297.345	0.966	NaN	2.038762	0.2638342E-04	1.888036
07162011	05	0.004	0.000	0.001	0.000	0.001	0.000	0.001	0.000	0.001	0.000	0.002	297.188	0.969	NaN	2.933286	0.9984127E-04	1.468044
07162011	06	0.003	0.001	0.001	0.000	0.001	0.000	0.001	0.000	0.001	0.000	0.002	297.082	0.960	NaN	2.033046	0.1442383E-03	1.149067
07162011	07	0.004	0.001	0.002	0.000	0.001	0.000	0.000	0.000	0.002	0.000	0.002	297.753	0.931	0.1323819E-02	0.9356763	0.8676245E-04	1.032794
07162011	08	0.003	0.000	0.002	0.000	0.000	0.000	0.000	0.000	0.002	0.000	0.002	298.688	0.906	0.3349185E-03	0.7272727	0.2632096E-03	0.4413955
07162011	09	0.002	0.000	0.003	0.000	0.000	0.000	0.000	0.000	0.003	0.000	0.002	299.594	0.882	0.1626015E-03	0.5509642	0.3223169E-03	0.2328403
07162011	10	0.002	0.000	0.002	0.000	0.000	0.000	0.000	0.000	0.002	0.000	0.001	299.786	0.864	0.8231401E-04	0.2386635	0.1304797E-03	0.2622429
07162011	11	0.002	0.000	0.002	0.000	0.000	0.000	0.000	0.000	0.002	0.000	0.001	301.227	0.822	0.4172325E-04	0.1890359	0.1613308E-03	0.6882695E-01
07162011	12	0.002	0.000	0.002	0.000	0.000	0.000	0.000	0.000	0.002	0.000	0.001	301.841	0.809	0.3355742E-04	0.1798561	0.1725964E-03	0.1789340E-01
07162011	13	0.001	0.001	0.002	0.000	0.000	0.000	0.000	0.000	0.003	0.000	0.002	301.870	0.810	0.5584955E-04	0.3597122	0.5138912E-03	-0.1549159
07162011	14	0.001	0.001	0.002	0.000	0.000	0.000	0.000	0.000	0.004	0.000	0.003	302.317	0.810	0.2598166E-03	0.5143043	0.2487711E-03	0.3154202
07162011	15	0.001	0.001	0.002	0.000	0.000	0.000	0.000	0.000	0.004	0.000	0.004	302.002	0.824	0.1029968E-03	0.7367281	0.4689097E-03	0.1962181
07162011	16	0.001	0.001	0.003	0.000	0.000	0.000	0.000	0.000	0.004	0.000	0.004	301.610	0.839	0.1401305E-03	0.8262914	0.5049355E-03	0.2138974
07162011	17	0.001	0.001	0.003	0.000	0.000	0.000	0.000	0.000	0.004	0.000	0.004	301.072	0.858	0.1980662E-03	0.9394480	0.5443781E-03	0.2369721
07162011	18	0.001	0.000	0.003	0.000	0.000	0.000	0.000	0.000	0.004	0.000	0.003	300.447	0.877	0.7808805E-03	0.7990423	0.2377167E-03	0.5265100
07162011	19	0.002	0.000	0.002	0.000	0.000	0.000	0.000	0.000	0.003	0.000	0.002	299.681	0.896	0.2121925E-03	0.6557378	0.3006986E-03	0.3385988
07162011	20	0.002	0.000	0.002	0.000	0.000	0.000	0.000	0.000	0.002	0.000	0.002	298.834	0.905	0.2757907E-03	0.7272727	0.3719556E-03	0.2912062
07162011	21	0.002	0.000	0.002	0.000	0.000	0.000	0.000	0.000	0.002	0.000	0.002	298.221	0.917	0.3250837E-03	0.8163266	0.3616584E-03	0.3535654
07162011	22	0.002	0.000	0.002	0.000	0.000	0.000	0.000	0.000	0.003	0.000	0.002	297.730	0.915	0.4317760E-03	0.8163266	0.2447398E-03	0.5231594
07162011	23	0.003	0.000	0.002	0.000	0.000	0.000	0.000	0.000	0.003	0.000	0.002	297.064	0.930	0.8853078E-03	0.9345794	0.1460052E-03	0.8062478
07162011	24	0.003	0.000	0.002	0.000	0.000	0.000	0.000	0.000	0.003	0.000	0.002	296.489	0.943	0.1271188E-02	1.092896	0.1354994E-03	0.9066415
07172011	01	0.003	0.000	0.003	0.000	0.000	0.000	0.000	0.000	0.004	0.000	0.003	296.048	0.928	0.1237035E-02	1.401869	0.2781764E-03	0.7023873
07172011	02	0.003	0.000	0.002	0.000	0.000	0.000	0.000	0.000	0.005	0.000	0.003	295.572	0.932	0.1926124E-02	1.401869	0.1848312E-03	0.8799321
07172011	03	0.004	0.000	0.002	0.000	0.001	0.000	0.000	0.000	0.004	0.000	0.003	295.509	0.931	0.2990901E-02	1.402966	0.1166202E-03	1.080273
07172011	04	0.004	0.001	0.002	0.000	0.001	0.000	0.001	0.000	0.005	0.000	0.003	295.503	0.934	NaN	2.007618	0.1096903E-03	1.262513
07172011	05	0.004	0.001	0.002	0.000	0.001	0.000	0.000	0.000	0.005	0.000	0.003	295.635	0.925	0.3692150E-02	1.402966	0.9198146E-04	1.183347
07172011	06	0.004	0.001	0.002	0.000	0.001	0.000	0.000	0.000	0.006	0.000	0.004	295.670	0.932	0.3830194E-02	1.870256	0.1585883E-03	1.071630
07172011	07	0.004	0.001	0.003	0.000	0.001	0.000	0.000	0.000	0.006	0.000	0.003	296.276	0.929	0.3917217E-02	1.402966	0.7910287E-04	1.248855
07172011	08	0.004	0.000	0.004	0.000	0.000	0.000	0.000	0.000	0.007	0.000	0.004	297.507	0.891	0.1229107E-02	1.197605	0.2354139E-03	0.7064815
07172011	09	0.003	0.000	0.004	0.000	0.000	0.000	0.000	0.000	0.007	0.000	0.004	297.751	0.866	0.7138252E-03	1.023018	0.3373775E-03	0.4817671
07172011	10	0.004	0.000	0.005	0.000	0.000	0.000	0.000	0.000	0.007	0.000	0.004	299.769	0.797	0.3360510E-03	0.6861064	0.3548024E-03	0.2864050
07172011	11	0.004	0.000	0.005	0.000	0.000	0.000	0.000	0.000	0.007	0.000	0.004	300.103	0.765	0.2564788E-03	0.6024097	0.3847483E-03	0.1947152
07172011	12	0.005	0.000	0.005	0.000	0.000	0.000	0.000	0.000	0.007	0.000	0.004	301.623	0.716	0.1717210E-03	0.4993758	0.3717179E-03	0.1282140
07172011	13	0.004	0.000	0.007	0.000	0.000	0.000	0.000	0.000	0.007	0.000	0.004	302.406	0.686	0.9834766E-04	0.4514673	0.5049819E-03	-0.4864950E-01
07172011	14	0.004	0.000	0.007	0.000	0.000	0.000	0.000	0.000	0.007	0.000	0.004	302.666	0.678	0.8803606E-04	0.4371585	0.5199662E-03	-0.7533623E-01
07172011	15	0.004	0.000	0.007	0.000	0.000	0.000	0.000	0.000	0.006	0.000	0.003	302.252	0.686	0.9143353E-04	0.3386005	0.3156751E-03	0.3044716E-01
07172011	16	0.005	0.000	0.005	0.000	0.000	0.000	0.000	0.000	0.005	0.000	0.003	301.019	0.707	0.1346469E-03	0.3618818	0.2817057E-03	0.1087711
07172011	17	0.005	0.000	0.004	0.000	0.000	0.000	0.000	0.000	0.005	0.000	0.003	301.437	0.708	0.1223087E-03	0.3618818	0.2901356E-03	0.9596568E-01
07172011	18	0.004	0.000	0.004	0.001	0.001	0.000	0.000	0.000	0.005	0.000	0.003	300.549	0.725	0.2029538E-03	0.4053825	0.2275474E-03	0.2507931
07172011	19	0.004	0.001	0.004	0.001	0.001	0.000	0.000	0.001	0.006	0.000	0.004	299.549	0.752	0.5526185E-02	0.4346946	0.1047678E-04	1.617957
07172011	20	0.004	0.001	0.004	0.001	0.001	0.000	0.001	0.001	0.006	0.000	0.005	298.525	0.774	0.7994831E-02	0.6079834	0.1327589E-04	1.660828
07172011	21	0.004	0.001	0.003	0.001	0.001	0.000	0.001	0.001	0.007	0.000	0.006	297.966	0.795	0.1274729E-01	0.8626013	0.1568451E-04	1.740339
07172011	22	0.004	0.001	0.002	0.001	0.001	0.000	0.001	0.001	0.009	0.000	0.006	297.563	0.818	0.1661849E-01	0.9489260	0.1379203E-04	1.837604
07172011	23	0.004	0.001	0.002	0.001	0.001	0.000	0.001	0.001	0.010	0.000	0.007	297.234	0.839	0.2196181E-01	1.268062	0.1776827E-04	1.853495
07172011	24	0.004	0.001	0.002	0.001	0.001	0.000	0.001	0.001	0.011	0.000	0.008	296.890	0.870	0.3003770E-01	1.789425	0.2335346E-04	1.884362
07182011	01	0.005	0.001	0.002	0.001	0.001	0.000	0.001	0.001	0.011	0.000	0.008	296.674	0.886	0.3385013E-01	2.092757	0.2504375E-04	1.922019
07182011	02	0.006	0.001	0.003	0.001	0.001	0.000	0.001	0.001	0.011	0.000	0.008	296.426	0.908	0.3313094E-01	2.539618	0.3278827E-04	1.889050
07182011	03	0.006	0.002	0.003	0.001	0.001	0.000	0.001	0.001	0.011	0.000	0.008	296.288	0.910	0.3336620E-01	2.539618	0.3319227E-04	1.883731
07182011	04	0.007	0.002	0.003	0.001	0.002	0.001	0.001	0.002	0.010	0.000	0.008	296.215	0.899	0.2548218E-01	1.963287	0.2380824E-04	1.916256
07182011	05	0.007	0.003	0.003	0.001	0.002	0.001	0.002	0.002	0.009	0.000	0.009	296.067	0.900	0.2961075E-01	2.280126	0.2686906E-04	1.928706
07182011	06	0.008	0.003	0.003	0.001	0.002	0.001	0.002	0.002	0.008	0.000	0.009	295.961	0.898	0.2977353E-01	2.280126	0.2713123E-04	1.924489
07182011	07	0.008	0.005	0.004	0.001	0.003	0.001	0.002	0.003	0.007	0.001	0.009	296.407	0.884	0.1729143E-01	1.671064	0.2507293E-04	1.823788
07182011	08	0.010	0.011	0.008	0.001	0.003	0.001	0.002	0.002	0.006	0.001	0.008	297.777	0.841	0.1011837E-01	1.316795	0.2564105E-04	1.710582
07182011	09	0.010	0.014	0.011	0.000	0.002	0.000	0.001	0.001	0.005	0.000	0.006	299.494	0.775	NaN	1.463407	0.2056929E-02	-0.1478543
07182011	10	0.010	0.009	0.008	0.000	0.001	0.000	0.001	0.001	0.004	0.000	0.004	301.044	0.714	NaN	0.8114838	0.1987642E-03	0.6109416
07182011	11	0.008	0.005	0.007	0.000	0.001	0.000	0.001	0.001	0.005	0.000	0.004	302.559	0.657	NaN	0.6124316	0.1904127E-03	0.5073617
07182011	12	0.007	0.003	0.006	0.000	0.001	0.000	0.001	0.000	0.007	0.000	0.005	303.816	0.612	NaN	0.6056228	0.7569989E-03	-0.9689303E-01
07182011	13	0.006	0.002	0.006	0.000	0.001	0.000	0.000	0.000	0.010	0.000	0.006	304.995	0.571	0.8118153E-04	0.4899936	0.6089608E-03	-0.9439895E-01
07182011	14	0.006	0.001	0.006	0.000	0.001	0.000	0.000	0.000	0.013	0.000	0.007	305.795	0.534	0.7605553E-04	0.5092393	0.6611372E-03	-0.1133696
07182011	15	0.006	0.001	0.006	0.000	0.001	0.000	0.000	0.000	0.016	0.000	0.009	305.555	0.528	0.9191036E-04	0.6494917	0.9261795E-03	-0.1541215
07182011	16	0.008	0.001	0.006	0.000	0.001	0.000	0.000	0.000	0.017	0.000	0.010	305.372	0.533	0.1236796E-03	0.7196180	0.8825504E-03	-0.8863751E-01
07182011	17	0.009	0.001	0.006	0.000	0.001	0.000	0.000	0.001	0.018	0.000	0.010	304.872	0.544	NaN	0.7959137	0.5967513E-03	0.1250726
07182011	18	0.008	0.001	0.005	0.000	0.001	0.000	0.000	0.001	0.019	0.000	0.011	304.269	0.548	NaN	0.8567855	0.8407920E-03	0.8183510E-02
07182011	19	0.010	0.001	0.005	0.000	0.001	0.000	0.001	0.001	0.017	0.000	0.010	303.561	0.545	NaN	0.7812703	0.3909854E-03	0.3006407
07182011	20	0.014	0.001	0.004	0.000	0.001	0.000	0.001	0.001	0.015	0.000	0.010	301.938	0.591	NaN	0.8625724	0.2679447E-03	0.5077504
07182011	21	0.020	0.001	0.004	0.000	0.001	0.000	0.001	0.002	0.012	0.000	0.010	300.650	0.621	NaN	0.8693787	0.1353060E-03	0.8078920
07182011	22	0.026	0.001	0.004	0.000	0.001	0.001	0.002	0.003	0.009	0.000	0.009	299.623	0.664	NaN	0.8470787	0.2693407E-04	1.497622
07182011	23	0.029	0.002	0.005	0.000	0.001	0.001	0.002	0.004	0.008	0.000	0.010	298.792	0.714	NaN	1.068429	0.2398704E-04	1.648769
07182011	24	0.032	0.002	0.005	0.000	0.001	0.001	0.002	0.004	0.006	0.000	0.010	298.043	0.773	NaN	1.355456	0.2463689E-04	1.740500
07192011	01	0.032	0.003	0.006	0.000	0.001	0.001	0.003	0.005	0.006	0.000	0.010	297.354	0.838	NaN	1.862075	0.1581402E-04	2.070955
07192011	02	0.030	0.003	0.006	0.000	0.002	0.001	0.003	0.005	0.007	0.000	0.011	296.859	0.882	NaN	2.798240	0.2228838E-04	2.098806
07192011	03	0.028	0.004	0.006	0.000	0.002	0.001	0.003	0.005	0.008	0.001	0.012	296.578	0.899	NaN	3.947932	0.3543328E-04	2.046958
07192011	04	0.026	0.004	0.006	0.000	0.002	0.001	0.003	0.006	0.009	0.001	0.013	296.373	0.906	NaN	4.407076	0.3751322E-04	2.069966
07192011	05	0.026	0.004	0.006	0.000	0.002	0.001	0.003	0.006	0.010	0.001	0.013	296.207	0.911	NaN	4.409534	0.3533426E-04	2.096197
07192011	06	0.027	0.005	0.006	0.000	0.002	0.001	0.003	0.006	0.011	0.001	0.014	296.074	0.918	NaN	5.397039	0.4196190E-04	2.109300
07192011	07	0.028	0.005	0.006	0.000	0.002	0.001	0.003	0.006	0.010	0.001	0.014	296.757	0.924	NaN	5.392911	0.4440213E-04	2.084419
07192011	08	0.022	0.004	0.006	0.000	0.002	0.001	0.003	0.006	0.010	0.000	0.014	299.118	0.838	NaN	2.487844	0.5767857E-04	1.634809
07192011	09	0.011	0.015	0.012	0.000	0.002	0.001	0.002	0.004	0.021	0.001	0.017	300.990	0.767	NaN	2.832422	0.1264756E-02	0.3501512
07192011	10	0.005	0.052	0.016	0.000	0.002	0.001	0.001	0.003	0.028	0.000	0.019	302.824	0.678	NaN	2.108418	0.6897393E-02	-0.5147283
07192011	11	0.003	0.103	0.023	0.000	0.001	0.000	0.001	0.002	0.030	0.000	0.021	304.104	0.620	0.7818341E-03	1.630706	0.4432007E-02	-0.4342247
07192011	12	0.002	0.086	0.020	0.000	0.001	0.000	0.001	0.001	0.029	0.000	0.021	305.167	0.576	0.1396537E-03	1.388924	0.4278209E-02	-0.4885834
07192011	13	0.002	0.060	0.017	0.000	0.001	0.000	0.001	0.001	0.028	0.000	0.020	306.473	0.536	0.1097322E-03	1.172936	0.4260302E-02	-0.5601659
07192011	14	0.001	0.035	0.013	0.000	0.001	0.000	0.000	0.001	0.022	0.000	0.021	307.162	0.520	0.1442432E-04	1.133382	0.1238824E-02	-0.3863354E-01
07192011	15	0.000	0.018	0.011	0.000	0.000	0.000	0.000	0.001	0.018	0.000	0.023	306.993	0.534	0.7748604E-06	1.618852	0.4409959E-02	-0.4352275
07192011	16	0.000	0.011	0.010	0.000	0.000	0.000	0.000	0.001	0.016	0.000	0.024	306.496	0.561	0.1311302E-05	2.079154	0.7535606E-02	-0.5592316
07192011	17	0.000	0.009	0.009	0.000	0.000	0.000	0.000	0.001	0.016	0.000	0.024	305.752	0.591	0.2324581E-05	2.266224	0.7656495E-02	-0.5287271
07192011	18	0.000	0.009	0.007	0.000	0.000	0.000	0.000	0.001	0.018	0.000	0.023	304.880	0.624	0.4529953E-05	2.146582	0.4836138E-02	-0.3527513
07192011	19	0.000	0.008	0.005	0.000	0.000	0.000	0.000	0.001	0.019	0.000	0.021	303.909	0.658	0.1430511E-04	2.003597	0.2567109E-02	-0.1076340
07192011	20	0.001	0.006	0.004	0.000	0.000	0.000	0.001	0.001	0.023	0.000	0.021	302.283	0.718	0.1596808E-03	2.317203	0.2624995E-02	-0.5416443E-01
07192011	21	0.002	0.005	0.003	0.001	0.000	0.000	0.001	0.001	0.027	0.000	0.021	301.056	0.760	0.000000	2.626580	0.3779774E-02	-0.1580751
07192011	22	0.002	0.004	0.002	0.001	0.000	0.000	0.001	0.002	0.030	0.000	0.022	300.184	0.792	0.000000	3.087668	0.4036504E-02	-0.1163748
07192011	23	0.003	0.003	0.002	0.001	0.001	0.000	0.001	0.002	0.031	0.000	0.021	299.487	0.822	0.000000	3.543510	0.3686198E-02	-0.1714497E-01
07192011	24	0.003	0.003	0.002	0.001	0.001	0.000	0.001	0.002	0.030	0.000	0.021	298.927	0.851	0.000000	4.175477	0.3542542E-02	0.7139111E-01
07202011	01	0.003	0.003	0.002	0.001	0.001	0.000	0.001	0.002	0.029	0.000	0.020	298.484	0.876	0.000000	4.902143	0.3387110E-02	0.1605566
07202011	02	0.003	0.002	0.001	0.001	0.001	0.000	0.001	0.002	0.028	0.000	0.019	298.084	0.899	0.000000	5.538717	0.3246797E-02	0.2319541
07202011	03	0.003	0.002	0.001	0.001	0.001	0.000	0.001	0.002	0.026	0.000	0.017	297.833	0.909	0.000000	6.175982	0.3157411E-02	0.2913749
07202011	04	0.003	0.001	0.001	0.001	0.002	0.000	0.001	0.001	0.024	0.000	0.015	297.641	0.915	0.1006079	5.711531	0.3969559E-04	2.158010
07202011	05	0.004	0.001	0.001	0.001	0.002	0.000	0.001	0.002	0.023	0.000	0.014	297.493	0.919	0.8735222E-01	4.895205	0.3446808E-04	2.152354
07202011	06	0.006	0.001	0.001	0.001	0.003	0.000	0.001	0.002	0.020	0.000	0.014	297.393	0.923	0.8748758E-01	4.898592	0.3484597E-04	2.147919
07202011	07	0.009	0.001	0.001	0.001	0.004	0.001	0.001	0.002	0.019	0.000	0.014	298.153	0.909	0.7643920E-01	4.350876	0.2973890E-04	2.165252
07202011	08	0.009	0.002	0.001	0.002	0.004	0.001	0.002	0.003	0.018	0.000	0.015	299.953	0.861	0.4635137E-01	2.912227	0.2285425E-04	2.105258
07202011	09	0.020	0.006	0.005	0.001	0.003	0.000	0.001	0.002	0.019	0.000	0.014	301.229	0.827	0.2284199E-01	2.422213	0.3937034E-04	1.789043
07202011	10	0.021	0.008	0.006	0.000	0.001	0.000	0.001	0.002	0.020	0.000	0.013	302.389	0.793	NaN	2.313001	0.1938084E-03	1.076803
07202011	11	0.013	0.007	0.006	0.000	0.001	0.000	0.000	0.001	0.021	0.000	0.012	303.502	0.760	NaN	1.980651	0.4556341E-03	0.6381918
07202011	12	0.005	0.002	0.006	0.000	0.000	0.000	0.000	0.001	0.020	0.000	0.011	303.004	0.774	NaN	1.726334	0.1610259E-02	0.3022900E-01
07202011	13	0.003	0.000	0.005	0.000	0.000	0.000	0.000	0.000	0.016	0.000	0.010	303.939	0.747	0.2077281E-02	1.364833	0.3317450E-03	0.6142751
07202011	14	0.002	0.000	0.005	0.000	0.000	0.000	0.000	0.000	0.013	0.000	0.009	304.619	0.723	0.2619624E-03	1.036783	0.7572881E-03	0.1364269
07202011	15	0.002	0.000	0.004	0.000	0.000	0.000	0.000	0.000	0.011	0.000	0.008	304.595	0.715	0.1897216E-03	0.9119395	0.7052504E-03	0.1116227
07202011	16	0.002	0.000	0.003	0.000	0.000	0.000	0.000	0.000	0.009	0.000	0.006	302.969	0.739	0.6529689E-03	0.7772974	0.3311653E-03	0.3705424
07202011	17	0.002	0.000	0.003	0.000	0.000	0.000	0.000	0.000	0.008	0.000	0.006	303.126	0.769	0.3148913E-03	0.8506554	0.5121828E-03	0.2203287
07202011	18	0.002	0.000	0.002	0.000	0.000	0.000	0.000	0.000	0.008	0.000	0.006	302.067	0.794	0.4160404E-03	0.9320985	0.5264270E-03	0.2481236
07202011	19	0.002	0.000	0.002	0.000	0.000	0.000	0.000	0.000	0.008	0.000	0.006	301.458	0.817	0.6139278E-03	1.082297	0.5125027E-03	0.3246503
07202011	20	0.002	0.000	0.002	0.000	0.000	0.000	0.000	0.000	0.008	0.000	0.006	300.310	0.840	0.8531213E-03	1.212455	0.5219987E-03	0.3659962
07202011	21	0.002	0.000	0.001	0.000	0.000	0.000	0.000	0.000	0.011	0.000	0.006	299.562	0.861	0.5912185E-03	1.431981	0.6706723E-03	0.3294268
07202011	22	0.005	0.000	0.001	0.000	0.000	0.000	0.000	0.000	0.011	0.000	0.006	299.100	0.870	0.1388788E-02	1.534527	0.3201900E-03	0.6805668
07202011	23	0.007	0.000	0.001	0.000	0.000	0.000	0.000	0.000	0.011	0.000	0.006	298.874	0.876	0.2617419E-02	1.652892	0.2085676E-03	0.8989978
07202011	24	0.007	0.000	0.001	0.000	0.000	0.000	0.000	0.000	0.011	0.000	0.006	298.694	0.885	0.2946436E-02	1.796407	0.2016193E-03	0.9498727
