# Supplementary material for: Understanding nitrate formation in a world with less sulfate
Source: Copernicus journal article supplement (doi:10.5194/acp-18-12765-2018), 2018-09-05
Supplement: Supplementary file 2 [file acp-18-12765-2018-supplement.zip › DATA/RAW DATA FOR DIURNALS/data_extract_YRK_dec_mod.csv]

Date	Hour	NH3	SO2	HNO3	CL	NA	MG	K	CA	NH4	NO3	SO4	T	RH	e_NO3	Water	H+	pH
12022011	01	0.002	0.291	0.047	0.001	0.002	0.004	0.008	0.020	0.062	0.051	0.034	274.832	0.831	0.5349191	9.365502	0.1501579E-03	1.794983
12022011	02	0.001	0.319	0.047	0.001	0.002	0.003	0.007	0.020	0.064	0.048	0.036	274.292	0.828	0.4931597	9.031662	0.1981056E-03	1.658871
12022011	03	0.001	0.345	0.045	0.001	0.002	0.003	0.007	0.019	0.067	0.047	0.037	273.674	0.839	0.5019407	10.00514	0.2630758E-03	1.580142
12022011	04	0.001	0.340	0.038	0.001	0.002	0.003	0.007	0.020	0.069	0.050	0.037	273.128	0.851	0.5690598	11.12494	0.2514454E-03	1.645854
12022011	05	0.001	0.310	0.025	0.001	0.002	0.004	0.008	0.020	0.070	0.055	0.036	272.648	0.860	0.6943603	12.74589	0.1875777E-03	1.832189
12022011	06	0.002	0.285	0.019	0.001	0.002	0.004	0.008	0.021	0.071	0.062	0.034	272.248	0.864	0.7770858	13.25669	0.1319811E-03	2.001923
12022011	07	0.002	0.272	0.015	0.002	0.002	0.004	0.009	0.023	0.074	0.070	0.033	271.939	0.863	0.8419734	14.10010	0.9636508E-04	2.165303
12022011	08	0.002	0.263	0.017	0.002	0.002	0.005	0.010	0.026	0.076	0.075	0.032	272.434	0.826	0.8066923	10.49169	0.6374942E-04	2.216369
12022011	09	0.002	0.252	0.040	0.001	0.002	0.005	0.011	0.030	0.078	0.077	0.032	274.441	0.748	0.6534514	5.869697	0.3064412E-04	2.282269
12022011	10	0.010	0.249	0.088	0.000	0.002	0.005	0.011	0.031	0.062	0.062	0.032	277.855	0.648	NaN	3.265357	0.7798617E-01	-1.378087
12022011	11	0.021	0.295	0.159	0.000	0.002	0.004	0.009	0.023	0.024	0.014	0.034	281.612	0.551	NaN	2.076550	0.1309949	-1.799912
12022011	12	0.001	0.340	0.180	0.000	0.002	0.003	0.006	0.014	0.039	0.004	0.039	284.323	0.485	0.1322871E-01	2.134791	0.3311338E-02	-0.1906481
12022011	13	0.000	0.352	0.166	0.000	0.002	0.002	0.005	0.012	0.037	0.001	0.039	286.555	0.426	0.1132965E-02	1.264121	0.6073925E-02	-0.6816807
12022011	14	0.000	0.341	0.160	0.000	0.001	0.001	0.003	0.009	0.033	0.001	0.039	287.365	0.416	0.1044869E-03	1.170725	0.2096257E-01	-1.252990
12022011	15	0.000	0.306	0.148	0.000	0.002	0.001	0.003	0.008	0.035	0.000	0.037	286.882	0.434	0.2022386E-03	1.177391	0.1596096E-01	-1.132138
12022011	16	0.000	0.277	0.133	0.000	0.002	0.001	0.003	0.008	0.036	0.000	0.036	285.479	0.481	0.4439950E-03	1.345553	0.1289484E-01	-0.9815150
12022011	17	0.000	0.255	0.117	0.000	0.002	0.001	0.003	0.009	0.036	0.000	0.034	283.745	0.538	0.1812935E-02	1.608001	0.6921294E-02	-0.6339009
12022011	18	0.002	0.236	0.096	0.000	0.002	0.002	0.004	0.011	0.038	0.002	0.033	281.888	0.602	0.2703249E-01	2.997637	0.3380261E-02	-0.5217130E-01
12022011	19	0.011	0.216	0.057	0.000	0.002	0.004	0.007	0.020	0.041	0.030	0.034	280.291	0.677	NaN	3.814133	0.4473548E-01	-1.069256
12022011	20	0.011	0.208	0.048	0.001	0.002	0.005	0.010	0.027	0.048	0.047	0.035	279.120	0.731	0.5264075	4.378923	0.1526647E-04	2.457629
12022011	21	0.008	0.206	0.054	0.001	0.002	0.006	0.012	0.032	0.054	0.054	0.035	278.214	0.760	0.5145931	4.702169	0.2209085E-04	2.328086
12022011	22	0.006	0.206	0.063	0.001	0.003	0.006	0.013	0.035	0.059	0.058	0.036	277.470	0.777	0.5004542	5.455924	0.3907279E-04	2.144994
12022011	23	0.004	0.204	0.075	0.001	0.003	0.006	0.013	0.037	0.061	0.060	0.036	276.808	0.791	0.4589490	5.791680	0.6055762E-04	1.980636
12022011	24	0.002	0.198	0.086	0.001	0.003	0.006	0.013	0.036	0.060	0.059	0.036	276.157	0.810	0.4138752	6.408485	0.1021356E-03	1.797578
12032011	01	0.002	0.188	0.087	0.001	0.003	0.006	0.012	0.034	0.056	0.055	0.036	275.536	0.837	0.3995933	7.970452	0.1744563E-03	1.659796
12032011	02	0.006	0.191	0.110	0.000	0.002	0.005	0.010	0.028	0.034	0.034	0.035	275.060	0.845	NaN	7.336780	0.1035063	-1.149461
12032011	03	0.000	0.186	0.110	0.000	0.002	0.004	0.009	0.024	0.035	0.027	0.035	274.730	0.838	NaN	6.661388	0.1044399	-1.195302
12032011	04	0.001	0.171	0.067	0.000	0.002	0.004	0.009	0.024	0.036	0.035	0.034	274.087	0.858	NaN	8.142969	0.6398156E-01	-0.8952720
12032011	05	0.001	0.160	0.049	0.001	0.002	0.004	0.009	0.024	0.039	0.039	0.033	273.593	0.870	0.4474305	9.174096	0.2108954E-03	1.638496
12032011	06	0.001	0.151	0.039	0.001	0.002	0.004	0.009	0.024	0.041	0.041	0.032	273.270	0.869	0.5135272	9.225933	0.1716676E-03	1.730322
12032011	07	0.001	0.157	0.047	0.001	0.002	0.004	0.009	0.024	0.043	0.043	0.031	273.052	0.862	0.4797688	8.515904	0.1741934E-03	1.689199
12032011	08	0.001	0.178	0.057	0.001	0.002	0.004	0.009	0.024	0.048	0.048	0.030	273.334	0.828	0.4568732	7.081294	0.1275884E-03	1.744301
12032011	09	0.002	0.187	0.062	0.001	0.002	0.004	0.010	0.027	0.054	0.054	0.031	275.347	0.715	0.4570156	3.719475	0.2219428E-04	2.224241
12032011	10	0.026	0.226	0.140	0.000	0.002	0.005	0.010	0.028	0.018	0.019	0.032	279.364	0.571	NaN	1.493560	0.1149999	-1.886475
12032011	11	0.013	0.290	0.171	0.001	0.002	0.005	0.010	0.027	0.024	0.014	0.035	282.990	0.456	0.1145391	0.7599241	0.2146645E-05	2.549010
12032011	12	0.001	0.410	0.191	0.001	0.002	0.004	0.008	0.021	0.044	0.011	0.044	285.823	0.364	0.8952618E-04	2.447973	0.2477602E-02	-0.5224849E-02
12032011	13	0.000	0.467	0.146	0.000	0.002	0.003	0.006	0.016	0.046	0.004	0.050	288.091	0.297	0.5646348E-03	1.010143	0.8242451E-02	-0.9116734
12032011	14	0.001	0.423	0.120	0.000	0.002	0.003	0.006	0.014	0.049	0.003	0.049	289.155	0.276	0.7756948E-03	1.009843	0.6513937E-02	-0.8095899
12032011	15	0.002	0.344	0.097	0.000	0.002	0.002	0.006	0.013	0.047	0.002	0.043	288.639	0.294	0.8701026E-02	1.053840	0.2594429E-02	-0.3912671
12032011	16	0.002	0.261	0.069	0.000	0.002	0.002	0.005	0.011	0.042	0.002	0.036	287.319	0.336	0.1414502E-01	1.397474	0.2672678E-02	-0.2816029
12032011	17	0.003	0.225	0.050	0.000	0.002	0.002	0.005	0.010	0.039	0.001	0.032	285.424	0.399	0.2468807E-01	1.938435	0.2782572E-02	-0.1569952
12032011	18	0.015	0.202	0.031	0.001	0.002	0.002	0.005	0.012	0.031	0.005	0.030	283.469	0.454	0.1143870	1.102531	0.4713579E-04	1.369040
12032011	19	0.022	0.181	0.026	0.001	0.002	0.003	0.006	0.014	0.028	0.010	0.030	281.723	0.533	0.2773408	1.461138	0.1561638E-04	1.971111
12032011	20	0.024	0.159	0.025	0.002	0.002	0.003	0.007	0.017	0.026	0.016	0.030	280.886	0.572	0.3733171	1.582371	0.7076456E-05	2.349493
12032011	21	0.022	0.142	0.027	0.002	0.003	0.004	0.008	0.020	0.024	0.022	0.030	280.531	0.591	0.4447614	1.736194	0.3110296E-05	2.746796
12032011	22	0.014	0.147	0.038	0.003	0.003	0.003	0.008	0.019	0.033	0.026	0.031	280.267	0.621	0.3912801	2.184303	0.8559896E-05	2.406844
12032011	23	0.009	0.167	0.042	0.004	0.003	0.003	0.009	0.019	0.040	0.024	0.037	280.226	0.638	0.3240642	2.760923	0.2959758E-04	1.969798
12032011	24	0.005	0.179	0.049	0.004	0.003	0.003	0.009	0.019	0.047	0.023	0.042	279.826	0.660	0.2577189	3.338039	0.8443430E-04	1.596973
12042011	01	0.004	0.191	0.047	0.004	0.003	0.003	0.009	0.019	0.051	0.020	0.044	279.590	0.669	0.2681136	3.642699	0.1051469E-03	1.539627
12042011	02	0.004	0.190	0.039	0.005	0.003	0.003	0.009	0.019	0.052	0.020	0.045	279.467	0.680	0.9216559E-01	7.757085	0.6192659E-02	0.9782134E-01
12042011	03	0.005	0.176	0.035	0.005	0.003	0.003	0.009	0.018	0.049	0.022	0.043	279.461	0.696	0.2946421	4.015114	0.1061948E-03	1.577594
12042011	04	0.005	0.169	0.035	0.005	0.003	0.003	0.009	0.017	0.046	0.023	0.040	279.804	0.695	0.2948503	3.802984	0.8339163E-04	1.659002
12042011	05	0.007	0.166	0.033	0.005	0.003	0.003	0.008	0.016	0.043	0.022	0.036	280.278	0.692	0.3334927	3.420765	0.4707990E-04	1.861288
12042011	06	0.007	0.167	0.032	0.005	0.003	0.003	0.008	0.015	0.040	0.021	0.034	280.238	0.715	0.3383651	3.687194	0.4801297E-04	1.885337
12042011	07	0.008	0.168	0.030	0.004	0.003	0.003	0.008	0.015	0.040	0.022	0.033	280.015	0.742	0.3925031	4.033236	0.4092678E-04	1.993646
12042011	08	0.009	0.169	0.026	0.004	0.003	0.003	0.009	0.015	0.039	0.025	0.032	280.202	0.754	0.4319571	4.189938	0.3179978E-04	2.119783
12042011	09	0.010	0.173	0.029	0.004	0.003	0.003	0.009	0.016	0.038	0.026	0.031	281.644	0.753	0.4126556	3.957426	0.2211330E-04	2.252759
12042011	10	0.014	0.171	0.037	0.004	0.003	0.003	0.009	0.016	0.036	0.025	0.031	284.773	0.668	0.2543256	2.490759	0.1461521E-04	2.231527
12042011	11	0.013	0.173	0.051	0.003	0.003	0.002	0.007	0.012	0.033	0.014	0.030	286.745	0.647	0.1096285	2.169126	0.4857640E-04	1.649859
12042011	12	0.002	0.184	0.039	0.003	0.002	0.002	0.004	0.008	0.030	0.003	0.027	288.200	0.631	0.1248121E-03	2.620087	0.2020039E-02	0.1129560
12042011	13	0.002	0.177	0.037	0.003	0.002	0.001	0.004	0.007	0.028	0.003	0.026	289.296	0.618	0.5346537E-04	1.750782	0.1764497E-02	-0.3388782E-02
12042011	14	0.002	0.154	0.037	0.002	0.002	0.001	0.003	0.007	0.027	0.002	0.025	289.623	0.619	0.5114079E-04	1.679595	0.1769115E-02	-0.2255170E-01
12042011	15	0.001	0.132	0.035	0.001	0.002	0.001	0.003	0.006	0.026	0.001	0.025	289.138	0.632	0.000000	1.698017	0.3434796E-02	-0.3059588
12042011	16	0.000	0.113	0.030	0.001	0.002	0.001	0.003	0.006	0.027	0.001	0.028	287.887	0.655	0.000000	2.034314	0.7824146E-02	-0.5850190
12042011	17	0.001	0.104	0.022	0.001	0.002	0.002	0.003	0.008	0.030	0.001	0.029	286.645	0.695	0.000000	2.509988	0.2227105E-02	0.5193106E-01
12042011	18	0.005	0.091	0.017	0.001	0.003	0.002	0.004	0.010	0.028	0.001	0.027	285.279	0.726	0.1075089E-02	4.908430	0.2072552E-02	0.3744371
12042011	19	0.012	0.079	0.020	0.002	0.003	0.002	0.005	0.012	0.017	0.005	0.025	284.030	0.774	0.1670711	2.409723	0.3680450E-04	1.816066
12042011	20	0.012	0.067	0.023	0.003	0.003	0.003	0.006	0.015	0.012	0.009	0.024	283.638	0.788	0.2573410	2.426483	0.1067469E-04	2.356622
12042011	21	0.009	0.059	0.025	0.004	0.003	0.003	0.006	0.017	0.012	0.010	0.024	283.777	0.800	0.2473857	2.238841	0.7615311E-05	2.468336
12042011	22	0.006	0.054	0.025	0.004	0.003	0.003	0.006	0.016	0.017	0.009	0.025	283.941	0.819	0.2551924	2.884701	0.1374575E-04	2.321932
12042011	23	0.003	0.033	0.025	0.005	0.003	0.003	0.006	0.014	0.026	0.008	0.027	283.997	0.832	0.2427177	3.764562	0.3326717E-04	2.053699
12042011	24	0.001	0.028	0.023	0.005	0.004	0.003	0.006	0.013	0.033	0.007	0.029	283.855	0.847	0.2866454	5.033029	0.5124854E-04	1.992148
12052011	01	0.002	0.023	0.020	0.004	0.004	0.002	0.005	0.012	0.033	0.004	0.030	283.525	0.867	0.7207990E-03	10.76283	0.2041334E-02	0.7220126
12052011	02	0.002	0.020	0.016	0.004	0.004	0.002	0.005	0.011	0.032	0.004	0.030	283.418	0.877	0.3173351E-03	10.19820	0.1878447E-02	0.7347246
12052011	03	0.002	0.019	0.014	0.004	0.004	0.002	0.005	0.010	0.031	0.003	0.029	283.711	0.880	0.1372695E-03	9.647237	0.1846304E-02	0.7180998
12052011	04	0.001	0.021	0.013	0.004	0.004	0.002	0.004	0.008	0.028	0.003	0.029	283.996	0.888	0.000000	6.255102	0.1552321E-02	0.6052529
12052011	05	0.001	0.023	0.013	0.004	0.004	0.001	0.004	0.007	0.026	0.003	0.028	284.027	0.905	0.000000	7.427706	0.2539416E-02	0.4661209
12052011	06	0.001	0.022	0.013	0.004	0.004	0.001	0.004	0.007	0.026	0.002	0.027	284.046	0.920	0.000000	7.994309	0.1965072E-02	0.6094025
12052011	07	0.001	0.021	0.014	0.003	0.004	0.002	0.004	0.007	0.027	0.003	0.026	284.059	0.930	0.000000	10.58701	0.1478469E-02	0.8549610
12052011	08	0.001	0.019	0.014	0.004	0.004	0.002	0.004	0.007	0.030	0.004	0.026	284.304	0.926	0.000000	13.39074	0.1751532E-02	0.8833866
12052011	09	0.003	0.021	0.013	0.004	0.004	0.002	0.004	0.007	0.031	0.004	0.025	285.649	0.894	0.1896658	6.110511	0.1150015E-03	1.725374
12052011	10	0.002	0.032	0.015	0.004	0.004	0.002	0.003	0.006	0.028	0.002	0.023	288.119	0.840	0.3210902E-03	6.626229	0.2260437E-02	0.4670741
12052011	11	0.001	0.056	0.018	0.004	0.004	0.001	0.003	0.004	0.022	0.002	0.021	290.181	0.766	0.000000	2.593095	0.2160412E-02	0.7928170E-01
12052011	12	0.000	0.078	0.019	0.002	0.003	0.001	0.002	0.003	0.015	0.001	0.018	291.280	0.730	0.000000	1.915001	0.3217336E-02	-0.2253274
12052011	13	0.000	0.068	0.021	0.002	0.003	0.001	0.002	0.003	0.012	0.001	0.020	292.306	0.696	0.000000	1.992613	0.1938013E-02	0.1206619E-01
12052011	14	0.000	0.055	0.021	0.002	0.003	0.001	0.001	0.003	0.011	0.001	0.024	292.740	0.676	0.000000	2.724959	0.5669795E-02	-0.3182074
12052011	15	0.000	0.046	0.017	0.001	0.002	0.001	0.001	0.003	0.011	0.001	0.025	292.303	0.686	0.000000	3.080879	0.7721752E-02	-0.3990412
12052011	16	0.000	0.042	0.014	0.001	0.003	0.001	0.002	0.003	0.013	0.001	0.024	291.740	0.710	0.000000	2.765801	0.3680325E-02	-0.1240653
12052011	17	0.001	0.036	0.011	0.001	0.003	0.001	0.002	0.005	0.019	0.001	0.023	290.728	0.754	0.000000	2.432029	0.4071095E-02	-0.2237425
12052011	18	0.008	0.028	0.009	0.001	0.003	0.002	0.003	0.008	0.017	0.001	0.021	289.245	0.796	0.8254051E-03	5.423960	0.2419360E-02	0.3506161
12052011	19	0.015	0.018	0.008	0.002	0.003	0.003	0.005	0.012	0.004	0.002	0.019	287.889	0.866	0.2788908	2.395475	0.4052221E-05	2.771698
12052011	20	0.012	0.021	0.008	0.003	0.004	0.003	0.006	0.014	0.002	0.003	0.018	288.226	0.870	0.1311687	1.282028	0.2782027E-05	2.663536
12052011	21	0.009	0.046	0.007	0.004	0.004	0.003	0.006	0.013	0.004	0.003	0.017	288.334	0.885	0.1436942	1.557280	0.3418632E-05	2.658514
12052011	22	0.007	0.050	0.006	0.004	0.004	0.002	0.005	0.011	0.007	0.003	0.018	288.353	0.900	0.2152748	2.892314	0.8414094E-05	2.536238
12052011	23	0.007	0.049	0.006	0.004	0.004	0.002	0.005	0.011	0.008	0.002	0.018	288.364	0.917	0.2755091	3.736423	0.9390980E-05	2.599745
12052011	24	0.010	0.054	0.005	0.003	0.004	0.002	0.005	0.010	0.008	0.003	0.019	288.257	0.935	0.2957387	6.025883	0.2339451E-04	2.410907
12062011	01	0.009	0.048	0.005	0.003	0.004	0.002	0.005	0.009	0.012	0.003	0.019	287.581	0.964	0.4672822	11.26513	0.3865445E-04	2.464537
12062011	02	0.007	0.038	0.004	0.003	0.004	0.001	0.004	0.007	0.017	0.003	0.020	287.307	0.970	0.3932663	17.68001	0.1318571E-03	2.127379
12062011	03	0.007	0.028	0.004	0.003	0.004	0.001	0.004	0.006	0.020	0.002	0.020	287.193	0.969	0.4497961	18.96847	0.1221284E-03	2.191216
12062011	04	0.008	0.018	0.003	0.003	0.004	0.001	0.003	0.005	0.022	0.002	0.020	287.139	0.968	0.4628836	19.75407	0.1284723E-03	2.186847
12062011	05	0.010	0.011	0.002	0.003	0.004	0.001	0.003	0.004	0.022	0.002	0.019	287.115	0.967	0.5338271	19.89648	0.9771564E-04	2.308812
12062011	06	0.012	0.008	0.002	0.003	0.004	0.001	0.003	0.004	0.021	0.002	0.018	287.243	0.967	0.5918093	19.25217	0.7026203E-04	2.437759
12062011	07	0.012	0.007	0.003	0.003	0.004	0.001	0.003	0.004	0.018	0.002	0.016	287.980	0.947	0.3599333	9.132702	0.4505857E-04	2.306822
12062011	08	0.012	0.008	0.004	0.003	0.004	0.001	0.003	0.003	0.015	0.002	0.014	288.750	0.943	0.2428889	6.710239	0.4264600E-04	2.196860
12062011	09	0.011	0.008	0.004	0.002	0.004	0.001	0.002	0.003	0.015	0.002	0.013	288.774	0.947	0.2772729	7.503788	0.4100157E-04	2.262480
12062011	10	0.011	0.010	0.005	0.002	0.004	0.001	0.002	0.002	0.018	0.002	0.014	288.829	0.944	0.2232344	7.189342	0.5725627E-04	2.098866
12062011	11	0.009	0.011	0.007	0.002	0.003	0.001	0.002	0.002	0.021	0.002	0.015	289.208	0.933	0.1502256	6.471303	0.8204854E-04	1.896921
12062011	12	0.002	0.020	0.010	0.001	0.003	0.000	0.002	0.001	0.021	0.001	0.017	289.743	0.901	0.000000	5.121035	0.2432874E-02	0.3232381
12062011	13	0.000	0.031	0.014	0.001	0.002	0.000	0.001	0.001	0.014	0.001	0.019	289.349	0.906	0.000000	6.877809	0.6564717E-02	0.2023404E-01
12062011	14	0.000	0.027	0.016	0.001	0.001	0.000	0.001	0.001	0.013	0.000	0.020	289.057	0.902	0.000000	6.879555	0.8544051E-02	-0.9410350E-01
12062011	15	0.000	0.023	0.017	0.000	0.001	0.000	0.001	0.000	0.013	0.000	0.021	288.702	0.896	0.1821637E-02	7.780456	0.1062290E-01	-0.1352382
12062011	16	0.000	0.020	0.018	0.000	0.001	0.000	0.001	0.001	0.015	0.000	0.023	288.324	0.892	0.1728535E-02	7.350347	0.1015418E-01	-0.1403371
12062011	17	0.000	0.015	0.017	0.000	0.001	0.000	0.001	0.001	0.016	0.000	0.025	287.915	0.891	0.1886547E-02	8.074568	0.1152982E-01	-0.1547034
12062011	18	0.000	0.010	0.013	0.000	0.001	0.000	0.001	0.001	0.023	0.000	0.025	287.366	0.908	0.5164742E-02	8.876318	0.8000991E-02	0.4508907E-01
12062011	19	0.001	0.011	0.015	0.001	0.001	0.001	0.002	0.002	0.043	0.001	0.030	286.537	0.900	0.000000	8.943494	0.3600171E-02	0.3951841
12062011	20	0.001	0.012	0.015	0.003	0.001	0.001	0.003	0.003	0.048	0.001	0.029	286.034	0.892	0.2321601E-03	9.558258	0.2158043E-02	0.6463186
12062011	21	0.003	0.011	0.014	0.005	0.002	0.001	0.004	0.004	0.057	0.002	0.034	286.036	0.925	0.2516424	15.31464	0.3804637E-03	1.604793
12062011	22	0.005	0.008	0.008	0.004	0.002	0.001	0.004	0.004	0.050	0.003	0.029	286.151	0.933	0.3664290	13.31611	0.1560481E-03	1.931119
12062011	23	0.004	0.009	0.003	0.000	0.000	0.000	0.001	0.000	0.008	0.000	0.005	285.842	0.943	NaN	3.672308	0.3504744E-03	1.020283
12062011	24	0.002	0.011	0.003	0.000	0.000	0.000	0.000	0.000	0.005	0.000	0.003	285.530	0.939	0.1175791E-01	1.639344	0.1358859E-03	1.081496
12072011	01	0.002	0.011	0.004	0.000	0.000	0.000	0.001	0.000	0.009	0.000	0.005	285.158	0.941	NaN	3.495416	0.1095184E-02	0.5040118
12072011	02	0.001	0.010	0.006	0.000	0.000	0.000	0.001	0.000	0.012	0.000	0.007	284.778	0.939	0.6299531E-01	3.819292	0.1160773E-02	0.5172358
12072011	03	0.001	0.008	0.007	0.000	0.000	0.000	0.001	0.000	0.012	0.000	0.007	284.336	0.938	0.5983537E-01	3.819292	0.1161342E-02	0.5170227
12072011	04	0.001	0.007	0.007	0.000	0.000	0.000	0.001	0.000	0.012	0.000	0.007	283.817	0.939	0.6149012E-01	3.819292	0.1140416E-02	0.5249196
12072011	05	0.001	0.007	0.007	0.000	0.000	0.000	0.001	0.000	0.011	0.000	0.006	283.290	0.939	NaN	3.685664	0.3909250E-02	-0.2557771E-01
12072011	06	0.002	0.006	0.007	0.000	0.001	0.000	0.001	0.000	0.009	0.000	0.005	282.771	0.932	NaN	3.420226	0.2502960E-02	0.1356009
12072011	07	0.003	0.006	0.007	0.000	0.001	0.000	0.001	0.000	0.006	0.001	0.004	282.227	0.923	NaN	2.572526	0.3595613E-02	-0.1454131
12072011	08	0.003	0.007	0.008	0.000	0.001	0.000	0.001	0.000	0.004	0.000	0.003	281.658	0.914	NaN	1.910550	0.3914537E-02	-0.3115219
12072011	09	0.004	0.008	0.008	0.000	0.001	0.000	0.001	0.000	0.003	0.000	0.002	281.026	0.912	NaN	2.097680	0.2240059E-02	-0.2852029E-01
12072011	10	0.003	0.014	0.009	0.000	0.000	0.000	0.000	0.000	0.002	0.000	0.001	280.947	0.888	0.1245493E-01	0.3174202	0.1524273E-04	1.318572
12072011	11	0.003	0.029	0.013	0.000	0.000	0.000	0.000	0.000	0.002	0.000	0.001	280.212	0.881	0.1385391E-01	0.3053024	0.1458558E-04	1.320806
12072011	12	0.003	0.025	0.009	0.000	0.000	0.000	0.000	0.000	0.003	0.000	0.002	279.697	0.873	0.1760870E-01	0.5264344	0.4335311E-04	1.084324
12072011	13	0.003	0.025	0.007	0.000	0.001	0.000	0.000	0.000	0.003	0.000	0.002	279.128	0.870	0.3799725E-01	0.5630772	0.2191369E-04	1.409853
12072011	14	0.002	0.026	0.004	0.000	0.001	0.000	0.000	0.000	0.003	0.000	0.002	278.645	0.856	0.2646333E-01	0.4986227	0.3078512E-04	1.209431
12072011	15	0.001	0.047	0.002	0.000	0.001	0.000	0.000	0.000	0.003	0.000	0.002	278.396	0.829	0.1242328E-01	0.4127000	0.5856749E-04	0.8479779
12072011	16	0.001	0.087	0.003	0.000	0.001	0.000	0.000	0.000	0.003	0.000	0.002	278.083	0.813	0.1186496E-01	0.3748262	0.5897132E-04	0.8031892
12072011	17	0.002	0.098	0.005	0.001	0.001	0.000	0.000	0.000	0.005	0.000	0.004	277.777	0.797	0.1311302E-03	0.7017630	0.4235826E-03	0.2192523
12072011	18	0.000	0.087	0.009	0.001	0.002	0.000	0.001	0.001	0.012	0.000	0.010	277.494	0.789	0.000000	1.419166	0.2442511E-02	-0.2358033
12072011	19	0.000	0.067	0.017	0.001	0.002	0.000	0.001	0.001	0.017	0.000	0.020	276.922	0.791	0.000000	3.165557	0.1577795E-01	-0.6976005
12072011	20	0.000	0.054	0.025	0.001	0.002	0.000	0.002	0.002	0.019	0.000	0.027	277.024	0.765	0.000000	4.021677	0.2443413E-01	-0.7835898
12072011	21	0.000	0.051	0.035	0.001	0.002	0.000	0.002	0.002	0.020	0.001	0.029	276.891	0.748	0.000000	4.062217	0.2794564E-01	-0.8375509
12072011	22	0.000	0.051	0.042	0.001	0.002	0.000	0.002	0.002	0.019	0.001	0.029	276.734	0.731	0.000000	3.836126	0.2942305E-01	-0.8847949
12072011	23	0.000	0.053	0.050	0.001	0.002	0.000	0.002	0.003	0.019	0.001	0.030	276.551	0.716	0.000000	3.692852	0.2965721E-01	-0.9047685
12072011	24	0.000	0.057	0.059	0.000	0.002	0.000	0.002	0.003	0.020	0.001	0.031	276.264	0.707	0.1124918E-02	3.674068	0.3090545E-01	-0.9248879
12082011	01	0.000	0.060	0.066	0.001	0.002	0.000	0.002	0.003	0.022	0.002	0.031	275.971	0.695	0.000000	3.368045	0.2912017E-01	-0.9368160
12082011	02	0.000	0.060	0.070	0.001	0.002	0.000	0.002	0.003	0.023	0.002	0.030	275.682	0.689	0.000000	3.046710	0.2636498E-01	-0.9371962
12082011	03	0.000	0.059	0.071	0.001	0.002	0.000	0.002	0.003	0.024	0.003	0.029	275.193	0.696	0.000000	2.927807	0.2330625E-01	-0.9009300
12082011	04	0.000	0.056	0.072	0.000	0.002	0.000	0.002	0.003	0.025	0.003	0.028	274.601	0.711	0.2020895E-02	2.888477	0.2040787E-01	-0.8491287
12082011	05	0.000	0.054	0.071	0.000	0.002	0.000	0.002	0.003	0.026	0.003	0.028	274.194	0.725	0.2657890E-02	3.109069	0.1924963E-01	-0.7917920
12082011	06	0.000	0.054	0.072	0.000	0.002	0.000	0.002	0.003	0.027	0.003	0.028	273.815	0.739	0.3272057E-02	3.219156	0.1819676E-01	-0.7522520
12082011	07	0.000	0.053	0.071	0.000	0.002	0.000	0.002	0.003	0.026	0.003	0.028	273.489	0.751	0.3321290E-02	3.382767	0.1907077E-01	-0.7510962
12082011	08	0.000	0.050	0.066	0.000	0.002	0.000	0.002	0.003	0.026	0.003	0.028	273.580	0.744	0.3073692E-02	3.242624	0.1918283E-01	-0.7720162
12082011	09	0.000	0.047	0.061	0.000	0.001	0.000	0.002	0.003	0.025	0.002	0.028	274.860	0.694	0.1552463E-02	2.657526	0.2153766E-01	-0.9087211
12082011	10	0.000	0.058	0.059	0.000	0.001	0.000	0.002	0.002	0.023	0.002	0.027	276.778	0.624	0.6260872E-03	2.045144	0.2380981E-01	-1.066032
12082011	11	0.000	0.069	0.054	0.000	0.001	0.000	0.001	0.002	0.023	0.001	0.026	278.939	0.548	0.3093481E-04	1.541847	0.2770127E-02	-0.2544585
12082011	12	0.000	0.073	0.048	0.000	0.001	0.000	0.001	0.002	0.022	0.001	0.025	280.586	0.497	0.1341105E-04	1.230741	0.1129648E-02	0.3722348E-01
12082011	13	0.000	0.075	0.043	0.000	0.001	0.000	0.001	0.002	0.020	0.001	0.022	281.906	0.457	0.9953976E-05	0.9139807	0.7479471E-03	0.8706612E-01
12082011	14	0.000	0.087	0.043	0.000	0.001	0.000	0.001	0.002	0.020	0.001	0.021	282.278	0.452	0.1102686E-03	0.8283142	0.1601796E-01	-1.286412
12082011	15	0.000	0.099	0.045	0.000	0.001	0.000	0.001	0.002	0.021	0.001	0.021	281.829	0.471	0.1569986E-03	0.8853076	0.1501032E-01	-1.229296
12082011	16	0.000	0.110	0.046	0.000	0.001	0.000	0.001	0.003	0.022	0.000	0.021	280.879	0.510	0.3173947E-03	0.9508272	0.1199380E-01	-1.100855
12082011	17	0.000	0.118	0.045	0.000	0.001	0.000	0.001	0.003	0.022	0.000	0.021	279.563	0.560	0.5014539E-03	1.139535	0.1194115E-01	-1.020319
12082011	18	0.000	0.129	0.050	0.000	0.001	0.001	0.001	0.003	0.023	0.000	0.021	278.266	0.622	0.1462400E-02	1.462673	0.8734372E-02	-0.7760845
12082011	19	0.000	0.140	0.069	0.000	0.001	0.001	0.002	0.004	0.024	0.000	0.021	277.279	0.688	0.5230606E-02	1.820675	0.4771968E-02	-0.4184652
12082011	20	0.000	0.148	0.090	0.000	0.001	0.001	0.002	0.004	0.025	0.000	0.021	276.517	0.739	0.9371936E-02	2.220880	0.4151059E-02	-0.2716338
12082011	21	0.000	0.152	0.102	0.000	0.001	0.001	0.002	0.004	0.026	0.000	0.021	275.999	0.764	0.1350874E-01	2.428629	0.3809494E-02	-0.1955061
12082011	22	0.000	0.152	0.109	0.000	0.001	0.001	0.002	0.005	0.027	0.000	0.021	275.654	0.776	0.2533817E-01	2.556977	0.2946593E-02	-0.6159342E-01
12082011	23	0.001	0.153	0.097	0.000	0.001	0.001	0.003	0.006	0.028	0.000	0.022	275.413	0.782	0.3729242E-01	3.488150	0.3811951E-02	-0.3855211E-01
12082011	24	0.001	0.161	0.074	0.000	0.001	0.001	0.003	0.007	0.032	0.008	0.022	275.191	0.790	NaN	3.329790	0.7287326E-01	-1.340151
12092011	01	0.001	0.178	0.067	0.000	0.001	0.001	0.003	0.008	0.036	0.015	0.023	274.996	0.797	NaN	3.895839	0.6873637E-01	-1.246586
12092011	02	0.001	0.206	0.064	0.000	0.001	0.002	0.004	0.009	0.040	0.016	0.026	274.826	0.802	NaN	4.572542	0.6339483E-01	-1.141896
12092011	03	0.000	0.231	0.071	0.000	0.001	0.001	0.004	0.008	0.041	0.009	0.028	274.612	0.813	0.7546896E-01	6.489539	0.6223318E-02	0.1819182E-01
12092011	04	0.000	0.239	0.071	0.000	0.001	0.001	0.003	0.008	0.040	0.005	0.031	274.370	0.825	0.5355304E-01	4.599295	0.4234313E-02	0.3590825E-01
12092011	05	0.000	0.243	0.073	0.000	0.001	0.001	0.003	0.007	0.038	0.003	0.032	274.101	0.837	0.3052473E-01	5.126682	0.6504703E-02	-0.1033911
12092011	06	0.000	0.255	0.078	0.000	0.001	0.001	0.003	0.007	0.036	0.002	0.034	273.852	0.849	0.1903790E-01	5.741710	0.9758243E-02	-0.2303304
12092011	07	0.000	0.265	0.075	0.000	0.001	0.001	0.003	0.007	0.036	0.002	0.035	273.666	0.858	0.1946265E-01	6.405428	0.1073852E-01	-0.2243961
12092011	08	0.000	0.268	0.066	0.000	0.001	0.002	0.004	0.009	0.038	0.003	0.036	273.972	0.832	0.2973503E-01	5.244743	0.6871549E-02	-0.1173304
12092011	09	0.000	0.262	0.055	0.000	0.002	0.002	0.005	0.012	0.042	0.004	0.037	275.571	0.758	0.6232297E-01	4.573756	0.3933648E-02	0.6547752E-01
12092011	10	0.000	0.287	0.067	0.000	0.002	0.002	0.004	0.010	0.042	0.001	0.040	278.131	0.662	0.8292139E-02	2.928902	0.7609438E-02	-0.4146477
12092011	11	0.000	0.313	0.065	0.000	0.002	0.002	0.004	0.010	0.043	0.001	0.043	280.777	0.575	0.2200902E-02	2.251792	0.1253735E-01	-0.7456774
12092011	12	0.000	0.361	0.071	0.000	0.001	0.001	0.003	0.008	0.036	0.001	0.048	283.247	0.488	0.2670288E-04	2.105107	0.1181102E-02	0.2509866
12092011	13	0.000	0.310	0.068	0.000	0.001	0.001	0.003	0.007	0.031	0.001	0.046	284.892	0.434	0.2205372E-05	1.887757	0.2472484E-02	-0.1171873
12092011	14	0.000	0.271	0.064	0.000	0.001	0.001	0.003	0.006	0.028	0.001	0.044	285.497	0.422	0.1192093E-05	1.928994	0.4348179E-02	-0.3529766
12092011	15	0.000	0.256	0.061	0.000	0.001	0.001	0.003	0.006	0.027	0.001	0.044	284.973	0.437	0.1907349E-05	2.132266	0.5455802E-02	-0.4080172
12092011	16	0.000	0.219	0.055	0.000	0.001	0.001	0.003	0.006	0.025	0.001	0.041	284.054	0.465	0.3874302E-05	2.125976	0.4591180E-02	-0.3343658
12092011	17	0.000	0.186	0.050	0.000	0.001	0.001	0.002	0.005	0.023	0.000	0.037	282.759	0.501	0.7390976E-05	2.170191	0.4855705E-02	-0.3497543
12092011	18	0.000	0.167	0.048	0.000	0.001	0.001	0.003	0.006	0.023	0.000	0.036	281.683	0.543	0.2521276E-04	2.106679	0.2487779E-02	-0.7221337E-01
12092011	19	0.000	0.148	0.041	0.000	0.001	0.001	0.003	0.009	0.027	0.000	0.035	280.888	0.589	0.5799532E-03	1.917301	0.1856040E-01	-0.9858970
12092011	20	0.000	0.136	0.036	0.000	0.001	0.002	0.004	0.010	0.031	0.000	0.034	280.277	0.622	0.2924502E-02	1.999902	0.7233161E-02	-0.5583194
12092011	21	0.001	0.137	0.040	0.000	0.002	0.002	0.004	0.011	0.032	0.001	0.033	279.677	0.640	0.2296847E-01	2.184979	0.2191168E-02	-0.1228362E-02
12092011	22	0.001	0.143	0.049	0.000	0.002	0.002	0.004	0.011	0.034	0.001	0.032	278.867	0.658	0.3988802E-01	2.868507	0.2509919E-02	0.5799615E-01
12092011	23	0.001	0.144	0.048	0.000	0.002	0.002	0.005	0.012	0.037	0.001	0.032	277.848	0.681	0.6248873E-01	4.239826	0.3538332E-02	0.7854942E-01
12092011	24	0.002	0.143	0.041	0.000	0.003	0.002	0.005	0.013	0.039	0.008	0.032	277.039	0.701	0.8763915E-01	5.825831	0.4722273E-02	0.9120679E-01
12102011	01	0.002	0.145	0.044	0.000	0.003	0.002	0.005	0.013	0.041	0.017	0.032	276.409	0.711	NaN	3.409708	0.4337199E-01	-1.104492
12102011	02	0.002	0.145	0.046	0.001	0.003	0.002	0.005	0.012	0.042	0.017	0.031	275.899	0.719	0.2586419	3.490939	0.1541949E-03	1.354872
12102011	03	0.001	0.139	0.043	0.001	0.003	0.002	0.005	0.010	0.042	0.014	0.031	275.535	0.726	0.2108415	3.597260	0.2638142E-03	1.134674
12102011	04	0.001	0.119	0.041	0.001	0.003	0.002	0.004	0.008	0.041	0.005	0.030	275.355	0.725	0.1868546E-02	5.296529	0.1181857E-02	0.6514264
12102011	05	0.001	0.100	0.037	0.001	0.003	0.001	0.004	0.007	0.039	0.002	0.028	275.157	0.728	0.1781464E-02	4.590027	0.1089646E-02	0.6245298
12102011	06	0.001	0.100	0.034	0.001	0.002	0.001	0.004	0.006	0.037	0.002	0.027	274.923	0.731	0.1304448E-02	3.796546	0.9624331E-03	0.5960182
12102011	07	0.001	0.106	0.031	0.002	0.002	0.001	0.004	0.006	0.036	0.002	0.026	274.725	0.730	0.1497030E-02	3.925912	0.9699143E-03	0.6072072
12102011	08	0.001	0.110	0.023	0.002	0.002	0.001	0.004	0.006	0.037	0.005	0.026	274.853	0.719	0.1947820E-02	4.039464	0.1014996E-02	0.5998592
12102011	09	0.003	0.115	0.018	0.003	0.002	0.001	0.004	0.007	0.040	0.011	0.027	276.306	0.666	0.2676093	2.537234	0.1308103E-03	1.287719
12102011	10	0.002	0.130	0.037	0.002	0.002	0.001	0.004	0.008	0.044	0.008	0.030	278.570	0.598	0.1513769	2.138968	0.1923687E-03	1.046070
12102011	11	0.001	0.132	0.071	0.001	0.002	0.001	0.004	0.007	0.041	0.002	0.030	280.410	0.538	0.2641678E-03	2.244790	0.1361091E-02	0.2172885
12102011	12	0.001	0.126	0.080	0.000	0.001	0.001	0.004	0.007	0.039	0.001	0.030	281.773	0.503	0.1853412E-01	1.595036	0.2262414E-02	-0.1518015
12102011	13	0.001	0.116	0.081	0.000	0.001	0.001	0.004	0.008	0.037	0.001	0.032	282.884	0.477	0.4637301E-02	1.348507	0.3596844E-02	-0.4260683
12102011	14	0.000	0.118	0.072	0.000	0.001	0.001	0.004	0.008	0.035	0.001	0.032	283.119	0.473	0.1631975E-02	1.212704	0.6081341E-02	-0.7002446
12102011	15	0.000	0.125	0.060	0.000	0.001	0.001	0.003	0.007	0.032	0.001	0.031	282.290	0.492	0.7783771E-03	1.190731	0.9946547E-02	-0.9218588
12102011	16	0.000	0.140	0.053	0.000	0.001	0.001	0.003	0.007	0.032	0.001	0.033	281.086	0.518	0.7095933E-03	1.438660	0.1386047E-01	-0.9838200
12102011	17	0.000	0.152	0.048	0.000	0.001	0.001	0.004	0.008	0.033	0.001	0.037	279.457	0.552	0.8577704E-03	1.793893	0.1777613E-01	-0.9960405
12102011	18	0.000	0.155	0.046	0.000	0.001	0.001	0.004	0.009	0.036	0.001	0.043	277.985	0.589	0.1095533E-02	2.472451	0.2464971E-01	-0.9986842
12102011	19	0.000	0.113	0.043	0.000	0.001	0.002	0.004	0.010	0.037	0.001	0.048	276.939	0.626	0.1570821E-02	3.313126	0.2927102E-01	-0.9461998
12102011	20	0.000	0.084	0.043	0.001	0.001	0.002	0.005	0.011	0.037	0.002	0.051	276.115	0.659	0.000000	3.900548	0.3187702E-01	-0.9123521
12102011	21	0.000	0.072	0.043	0.001	0.001	0.002	0.005	0.010	0.036	0.003	0.055	275.343	0.687	0.000000	5.154248	0.4235047E-01	-0.9146929
12102011	22	0.000	0.060	0.040	0.001	0.001	0.002	0.005	0.010	0.034	0.004	0.056	274.593	0.712	0.000000	5.935601	0.4579299E-01	-0.8873343
12102011	23	0.000	0.054	0.039	0.001	0.001	0.002	0.005	0.010	0.033	0.004	0.055	273.876	0.736	0.000000	6.519994	0.4394911E-01	-0.8287029
12102011	24	0.000	0.053	0.042	0.001	0.001	0.002	0.005	0.010	0.033	0.004	0.055	273.194	0.758	0.000000	7.063569	0.4321607E-01	-0.7866210
12112011	01	0.000	0.055	0.045	0.001	0.001	0.002	0.005	0.010	0.033	0.004	0.054	272.516	0.783	0.000000	7.429404	0.4042424E-01	-0.7356879
12112011	02	0.000	0.059	0.046	0.000	0.001	0.002	0.005	0.010	0.033	0.004	0.054	271.992	0.804	0.6682694E-02	8.142407	0.3934049E-01	-0.6840870
12112011	03	0.000	0.051	0.041	0.000	0.001	0.002	0.005	0.011	0.034	0.004	0.053	271.655	0.819	0.1005822E-01	8.711133	0.3365178E-01	-0.5869334
12112011	04	0.000	0.044	0.039	0.000	0.001	0.002	0.005	0.011	0.036	0.005	0.053	271.385	0.832	0.1090956E-01	8.686830	0.3076826E-01	-0.5492416
12112011	05	0.000	0.041	0.038	0.000	0.001	0.002	0.005	0.011	0.037	0.005	0.053	271.146	0.844	0.1262164E-01	9.051800	0.2874100E-01	-0.5017669
12112011	06	0.000	0.040	0.037	0.000	0.002	0.002	0.005	0.011	0.038	0.005	0.053	270.992	0.851	0.1594758E-01	9.555250	0.2611187E-01	-0.4365958
12112011	07	0.000	0.042	0.035	0.000	0.002	0.002	0.006	0.012	0.040	0.005	0.052	270.884	0.855	0.2351546E-01	9.515629	0.1996871E-01	-0.3219125
12112011	08	0.000	0.045	0.032	0.000	0.002	0.002	0.006	0.013	0.044	0.004	0.051	271.345	0.821	0.2177125E-01	6.942542	0.1640383E-01	-0.3734267
12112011	09	0.000	0.051	0.031	0.000	0.002	0.003	0.007	0.015	0.049	0.004	0.049	273.224	0.735	0.5317116E-01	4.576347	0.5096777E-02	-0.4677674E-01
12112011	10	0.001	0.073	0.046	0.000	0.002	0.003	0.007	0.016	0.054	0.004	0.047	276.413	0.616	0.7504374E-01	4.369228	0.4151279E-02	0.2222275E-01
12112011	11	0.001	0.139	0.077	0.000	0.002	0.002	0.006	0.013	0.056	0.004	0.046	279.417	0.517	0.3493553E-01	2.678742	0.3410265E-02	-0.1048572
12112011	12	0.001	0.199	0.092	0.000	0.002	0.002	0.006	0.011	0.055	0.002	0.046	281.518	0.450	0.1324517E-01	1.896746	0.3656168E-02	-0.2850170
12112011	13	0.000	0.197	0.092	0.000	0.002	0.002	0.005	0.010	0.053	0.002	0.045	283.359	0.399	0.3212094E-02	1.524554	0.6418221E-02	-0.6242720
12112011	14	0.000	0.187	0.091	0.000	0.002	0.002	0.005	0.009	0.051	0.002	0.044	284.196	0.378	0.1674354E-02	1.367924	0.8218415E-02	-0.7787260
12112011	15	0.000	0.187	0.087	0.000	0.002	0.002	0.005	0.009	0.051	0.001	0.044	283.945	0.377	0.1741588E-02	1.367924	0.8215843E-02	-0.7785900
12112011	16	0.000	0.190	0.078	0.000	0.002	0.002	0.005	0.010	0.052	0.001	0.044	282.904	0.392	0.3983974E-02	1.457342	0.5508380E-02	-0.5774625
12112011	17	0.000	0.190	0.066	0.000	0.002	0.002	0.005	0.010	0.053	0.001	0.044	281.751	0.413	0.6662071E-02	1.586490	0.4677122E-02	-0.4695414
12112011	18	0.001	0.181	0.049	0.000	0.002	0.002	0.005	0.012	0.056	0.001	0.044	280.886	0.436	0.3693444E-01	2.191255	0.2734362E-02	-0.9616307E-01
12112011	19	0.007	0.163	0.036	0.000	0.002	0.003	0.006	0.015	0.058	0.009	0.044	280.372	0.456	NaN	2.096048	0.2354179E-01	-1.050438
12112011	20	0.012	0.146	0.034	0.001	0.002	0.003	0.007	0.016	0.060	0.020	0.044	280.029	0.475	0.3341413	2.104244	0.4786987E-04	1.643034
12112011	21	0.015	0.131	0.031	0.001	0.002	0.003	0.007	0.018	0.063	0.027	0.043	279.698	0.495	0.4454690	2.229544	0.2377556E-04	1.972085
12112011	22	0.015	0.118	0.029	0.002	0.002	0.003	0.007	0.018	0.062	0.029	0.043	279.336	0.516	0.4584934	2.415724	0.2587783E-04	1.970119
12112011	23	0.013	0.111	0.029	0.003	0.002	0.003	0.007	0.018	0.060	0.027	0.043	279.066	0.539	0.4432971	2.547578	0.3150495E-04	1.907749
12112011	24	0.009	0.112	0.029	0.004	0.002	0.003	0.007	0.016	0.057	0.021	0.042	278.925	0.557	0.3807706	2.636981	0.5123261E-04	1.711561
12122011	01	0.004	0.116	0.031	0.003	0.002	0.002	0.006	0.013	0.057	0.009	0.042	278.640	0.588	0.2523391	2.794405	0.1605245E-03	1.240748
12122011	02	0.002	0.119	0.030	0.003	0.002	0.002	0.005	0.011	0.055	0.003	0.040	279.162	0.568	0.1723647E-02	3.906835	0.1625013E-02	0.3809683
12122011	03	0.002	0.120	0.028	0.004	0.002	0.002	0.005	0.010	0.054	0.003	0.039	279.116	0.567	0.1622081E-02	3.749602	0.1579756E-02	0.3753951
12122011	04	0.002	0.105	0.029	0.004	0.002	0.002	0.005	0.010	0.053	0.004	0.038	279.025	0.557	0.1604617E-02	3.718557	0.1587595E-02	0.3696347
12122011	05	0.002	0.086	0.030	0.003	0.002	0.002	0.005	0.010	0.054	0.004	0.038	278.692	0.571	0.1871645E-02	3.985451	0.1597860E-02	0.3969387
12122011	06	0.005	0.065	0.025	0.003	0.002	0.002	0.005	0.010	0.053	0.011	0.038	278.836	0.558	0.2216746	2.423876	0.1639236E-03	1.169869
12122011	07	0.006	0.046	0.024	0.003	0.002	0.002	0.006	0.011	0.052	0.012	0.038	278.846	0.552	0.2615978	2.298338	0.1111341E-03	1.315566
12122011	08	0.004	0.036	0.028	0.002	0.002	0.002	0.006	0.012	0.054	0.008	0.040	279.111	0.617	0.2470129	2.937444	0.1583344E-03	1.268394
12122011	09	0.002	0.030	0.027	0.001	0.002	0.002	0.006	0.011	0.056	0.003	0.041	279.415	0.717	0.2543867E-02	6.321949	0.1717411E-02	0.5659769
12122011	10	0.004	0.029	0.021	0.002	0.002	0.002	0.006	0.012	0.057	0.008	0.042	280.247	0.665	0.2669573E-02	5.994734	0.1910809E-02	0.4965527
12122011	11	0.007	0.054	0.030	0.002	0.002	0.002	0.006	0.013	0.056	0.014	0.041	282.344	0.590	0.2010498	2.667389	0.1158797E-03	1.362079
12122011	12	0.002	0.121	0.052	0.001	0.002	0.002	0.005	0.011	0.056	0.004	0.042	283.797	0.542	0.4494190E-03	3.293381	0.2048453E-02	0.2062161
12122011	13	0.002	0.126	0.051	0.001	0.002	0.002	0.005	0.011	0.057	0.003	0.042	284.815	0.516	0.4254580E-03	3.246457	0.2228432E-02	0.1634103
12122011	14	0.002	0.119	0.048	0.001	0.002	0.002	0.005	0.011	0.056	0.003	0.041	284.944	0.520	0.4627109E-03	3.314624	0.2273719E-02	0.1636975
12122011	15	0.002	0.113	0.044	0.001	0.002	0.002	0.005	0.010	0.051	0.002	0.037	284.657	0.531	0.5205870E-03	3.340541	0.2211054E-02	0.1792175
12122011	16	0.002	0.113	0.040	0.000	0.002	0.001	0.004	0.009	0.044	0.002	0.032	284.041	0.553	0.3778684E-01	2.904827	0.2902865E-02	0.2933612E-03
12122011	17	0.002	0.123	0.036	0.000	0.001	0.001	0.004	0.009	0.042	0.001	0.031	283.097	0.579	0.4142439E-01	2.908957	0.2707014E-02	0.3124681E-01
12122011	18	0.008	0.121	0.027	0.000	0.002	0.002	0.004	0.010	0.036	0.005	0.030	281.911	0.619	NaN	2.449207	0.1685046E-01	-0.8375862
12122011	19	0.017	0.105	0.021	0.001	0.002	0.003	0.006	0.015	0.026	0.011	0.029	281.244	0.646	0.3425974	2.016078	0.1441696E-04	2.145634
12122011	20	0.019	0.070	0.022	0.001	0.002	0.003	0.007	0.018	0.020	0.015	0.028	280.751	0.682	0.4092812	2.004333	0.6149146E-05	2.513155
12122011	21	0.017	0.043	0.024	0.002	0.002	0.004	0.008	0.020	0.019	0.018	0.028	280.511	0.704	0.4370441	2.122115	0.4240938E-05	2.699307
12122011	22	0.015	0.033	0.025	0.002	0.002	0.004	0.008	0.021	0.020	0.020	0.028	280.038	0.741	0.4522594	2.457549	0.5760110E-05	2.630071
12122011	23	0.010	0.034	0.034	0.002	0.002	0.004	0.008	0.021	0.029	0.029	0.028	279.727	0.779	0.4654500	3.774261	0.1384753E-04	2.435459
12122011	24	0.008	0.029	0.034	0.002	0.002	0.004	0.008	0.021	0.035	0.035	0.029	279.545	0.791	0.4983106	4.680597	0.1930696E-04	2.384587
12132011	01	0.008	0.024	0.031	0.002	0.002	0.004	0.008	0.020	0.036	0.035	0.029	279.362	0.818	0.5487533	6.060667	0.2746632E-04	2.343720
12132011	02	0.007	0.020	0.029	0.002	0.002	0.003	0.008	0.020	0.037	0.034	0.030	279.272	0.819	0.5189623	5.792775	0.3118698E-04	2.268913
12132011	03	0.009	0.018	0.027	0.002	0.002	0.003	0.008	0.020	0.034	0.031	0.030	279.306	0.772	0.5039824	4.082015	0.1661001E-04	2.390505
12132011	04	0.009	0.019	0.027	0.002	0.002	0.003	0.008	0.019	0.033	0.030	0.030	279.312	0.807	0.4975996	5.157285	0.2839282E-04	2.259212
12132011	05	0.007	0.017	0.026	0.002	0.002	0.003	0.008	0.019	0.034	0.029	0.030	279.134	0.827	0.5120114	5.821545	0.3444698E-04	2.227887
12132011	06	0.007	0.017	0.022	0.002	0.002	0.003	0.008	0.019	0.035	0.032	0.030	278.894	0.847	0.5496636	6.937677	0.4246099E-04	2.213224
12132011	07	0.008	0.017	0.018	0.003	0.003	0.004	0.009	0.022	0.037	0.037	0.030	278.743	0.854	0.6516472	7.279553	0.2826207E-04	2.410901
12132011	08	0.014	0.018	0.018	0.002	0.003	0.004	0.011	0.027	0.035	0.034	0.030	279.037	0.799	0.6258169	3.796383	0.8239401E-05	2.663474
12132011	09	0.023	0.025	0.023	0.002	0.003	0.006	0.013	0.032	0.029	0.029	0.030	280.495	0.769	0.5281417	2.315569	0.4457499E-05	2.715566
12132011	10	0.021	0.029	0.038	0.001	0.003	0.006	0.013	0.032	0.027	0.028	0.029	283.672	0.733	0.2512075	1.097365	0.2060771E-05	2.726321
12132011	11	0.008	0.095	0.119	0.001	0.002	0.003	0.007	0.015	0.034	0.017	0.031	286.223	0.656	0.9988850E-01	2.384888	0.4407099E-04	1.733315
12132011	12	0.001	0.139	0.126	0.000	0.002	0.002	0.006	0.012	0.042	0.007	0.034	288.382	0.588	0.1921666E-01	3.702785	0.4255392E-02	-0.6041101E-01
12132011	13	0.001	0.190	0.123	0.000	0.002	0.002	0.005	0.010	0.041	0.004	0.039	290.094	0.533	0.1960099E-02	1.916964	0.4827338E-02	-0.4010938
12132011	14	0.000	0.179	0.115	0.000	0.002	0.002	0.004	0.009	0.038	0.004	0.038	290.754	0.516	0.5023479E-03	1.720188	0.8764899E-02	-0.7071710
12132011	15	0.000	0.158	0.103	0.000	0.001	0.001	0.004	0.008	0.034	0.003	0.035	290.201	0.533	0.2525449E-03	1.516709	0.1217119E-01	-0.9044306
12132011	16	0.000	0.149	0.095	0.000	0.001	0.001	0.003	0.007	0.032	0.003	0.033	289.248	0.565	0.2793670E-03	1.660089	0.1304937E-01	-0.8954584
12132011	17	0.001	0.141	0.084	0.000	0.001	0.001	0.004	0.009	0.035	0.002	0.033	287.809	0.603	0.2259731E-02	1.897618	0.4612639E-02	-0.3857407
12132011	18	0.017	0.132	0.071	0.000	0.002	0.003	0.006	0.015	0.031	0.007	0.034	285.974	0.649	NaN	3.083837	0.5301696E-01	-1.235323
12132011	19	0.035	0.133	0.052	0.001	0.002	0.004	0.010	0.025	0.019	0.016	0.035	284.506	0.706	0.3858959	2.928919	0.5495262E-05	2.726719
12132011	20	0.032	0.128	0.038	0.001	0.002	0.005	0.012	0.031	0.014	0.014	0.036	283.420	0.754	0.3472699	1.923594	0.2955824E-05	2.813435
12132011	21	0.028	0.120	0.028	0.001	0.003	0.006	0.014	0.035	0.010	0.010	0.037	282.627	0.778	0.2840346	1.231605	0.2011592E-05	2.786932
12132011	22	0.024	0.119	0.022	0.001	0.003	0.007	0.015	0.038	0.009	0.009	0.038	281.982	0.792	0.1314190	0.3851561	0.8452665E-06	2.658643
12132011	23	0.019	0.121	0.020	0.001	0.003	0.007	0.015	0.039	0.011	0.011	0.039	281.382	0.807	0.1925873	0.6468098	0.1725636E-05	2.573828
12132011	24	0.014	0.118	0.021	0.001	0.003	0.007	0.015	0.039	0.013	0.013	0.039	280.742	0.827	0.2626106	1.121937	0.3967315E-05	2.451472
12142011	01	0.012	0.111	0.026	0.001	0.003	0.007	0.015	0.038	0.014	0.014	0.039	280.187	0.847	0.3576636	2.321318	0.9333665E-05	2.395683
12142011	02	0.007	0.102	0.028	0.001	0.003	0.006	0.014	0.035	0.020	0.020	0.039	279.818	0.863	0.4138533	4.077270	0.1971860E-04	2.315494
12142011	03	0.005	0.093	0.029	0.002	0.003	0.006	0.013	0.032	0.027	0.027	0.038	279.563	0.868	0.4680698	6.119832	0.3585350E-04	2.232208
12142011	04	0.004	0.089	0.031	0.002	0.003	0.005	0.012	0.030	0.034	0.033	0.038	279.347	0.870	0.5138081	7.850620	0.5367982E-04	2.165093
12142011	05	0.004	0.087	0.032	0.002	0.003	0.005	0.012	0.029	0.040	0.040	0.038	279.143	0.872	0.5446243	9.242664	0.6836004E-04	2.130995
12142011	06	0.004	0.087	0.032	0.002	0.003	0.005	0.012	0.029	0.047	0.046	0.038	278.943	0.877	0.5946445	11.56921	0.9154478E-04	2.101670
12142011	07	0.005	0.083	0.027	0.003	0.003	0.005	0.013	0.031	0.055	0.054	0.038	278.750	0.885	0.6691008	14.09323	0.1041738E-03	2.131252
12142011	08	0.008	0.075	0.019	0.003	0.003	0.006	0.013	0.031	0.062	0.060	0.038	278.943	0.854	0.7433128	10.32085	0.3737206E-04	2.441169
12142011	09	0.014	0.075	0.023	0.003	0.003	0.006	0.014	0.033	0.067	0.065	0.038	280.543	0.797	0.7061301	7.133181	0.1709333E-04	2.620456
12142011	10	0.014	0.064	0.050	0.002	0.003	0.006	0.015	0.034	0.069	0.068	0.038	283.908	0.738	0.4923364	4.516034	0.1003096E-04	2.653415
12142011	11	0.017	0.061	0.092	0.001	0.003	0.005	0.011	0.025	0.030	0.030	0.033	287.438	0.633	0.1318783	1.313847	0.3150399E-05	2.620179
12142011	12	0.006	0.058	0.087	0.000	0.002	0.002	0.006	0.012	0.025	0.006	0.026	289.774	0.562	NaN	1.539473	0.7794695E-01	-1.704427
12142011	13	0.002	0.058	0.063	0.000	0.002	0.001	0.003	0.006	0.023	0.002	0.021	291.619	0.492	0.7883132E-02	1.214364	0.2292468E-02	-0.2759545
12142011	14	0.002	0.049	0.052	0.000	0.002	0.001	0.003	0.005	0.022	0.002	0.019	292.477	0.463	0.8104146E-02	1.170476	0.2409460E-02	-0.3135572
12142011	15	0.002	0.046	0.047	0.000	0.001	0.001	0.002	0.004	0.023	0.001	0.018	291.970	0.472	0.8302629E-02	1.090455	0.2262525E-02	-0.3169856
12142011	16	0.002	0.057	0.042	0.000	0.001	0.001	0.002	0.004	0.025	0.001	0.018	290.776	0.504	0.1241267E-01	1.446392	0.2449388E-02	-0.2287714
12142011	17	0.010	0.070	0.030	0.000	0.001	0.001	0.003	0.006	0.022	0.001	0.020	288.721	0.588	NaN	1.522226	0.2021123E-01	-1.123114
12142011	18	0.020	0.072	0.016	0.000	0.002	0.002	0.004	0.010	0.013	0.001	0.021	286.634	0.622	NaN	1.742365	0.8044212E-04	1.335656
12142011	19	0.021	0.073	0.012	0.001	0.002	0.002	0.006	0.013	0.005	0.002	0.021	285.254	0.643	0.1218853	0.9049393	0.5230164E-05	2.238104
12142011	20	0.018	0.067	0.011	0.002	0.002	0.003	0.007	0.016	0.002	0.003	0.021	284.332	0.688	0.1538441	0.6575561	0.1339483E-05	2.690996
12142011	21	0.014	0.059	0.010	0.002	0.002	0.004	0.008	0.019	0.002	0.002	0.021	283.892	0.697	0.5706948E-01	0.2224866	0.2677060E-06	2.919646
12142011	22	0.011	0.054	0.008	0.003	0.003	0.004	0.009	0.021	0.002	0.002	0.021	283.711	0.712	0.000000	0.2530763E-08	0.1189742E-18	7.327798
12142011	23	0.009	0.046	0.008	0.003	0.003	0.004	0.009	0.021	0.002	0.003	0.020	283.584	0.716	0.000000	0.2055635E-08	0.9636703E-19	7.329018
12142011	24	0.009	0.037	0.011	0.003	0.003	0.003	0.008	0.018	0.002	0.003	0.020	283.438	0.711	0.4710448E-01	0.2358453	0.3901035E-06	2.781447
12152011	01	0.006	0.031	0.014	0.003	0.003	0.003	0.008	0.015	0.006	0.004	0.020	283.301	0.700	0.1138567	0.6361530	0.2108585E-05	2.479570
12152011	02	0.006	0.030	0.014	0.003	0.003	0.002	0.008	0.014	0.008	0.004	0.020	283.070	0.714	0.1650130	0.8987151	0.2979672E-05	2.479454
12152011	03	0.006	0.031	0.012	0.003	0.003	0.002	0.008	0.014	0.008	0.005	0.020	282.826	0.731	0.1840670	0.9941058	0.3152544E-05	2.498771
12152011	04	0.007	0.033	0.010	0.003	0.003	0.002	0.008	0.014	0.008	0.005	0.021	282.523	0.747	0.2509511	1.343629	0.3571311E-05	2.575452
12152011	05	0.008	0.035	0.009	0.003	0.004	0.002	0.009	0.015	0.007	0.006	0.022	281.917	0.789	0.2964671	1.622041	0.4721662E-05	2.535967
12152011	06	0.010	0.038	0.010	0.002	0.004	0.003	0.009	0.016	0.006	0.007	0.022	281.483	0.823	0.3149108	1.753229	0.4806968E-05	2.561967
12152011	07	0.009	0.038	0.011	0.002	0.004	0.003	0.010	0.019	0.005	0.006	0.023	281.195	0.839	0.2465148	1.375995	0.3062012E-05	2.652610
12152011	08	0.011	0.037	0.011	0.001	0.004	0.004	0.012	0.023	0.003	0.004	0.023	281.256	0.839	0.7218122E-04	0.1496245E-03	0.7528032E-09	2.298321
12152011	09	0.010	0.035	0.014	0.001	0.004	0.005	0.012	0.026	0.002	0.003	0.024	282.789	0.823	0.8046627E-04	0.1607456E-03	0.1079821E-08	2.172787
12152011	10	0.012	0.039	0.026	0.002	0.004	0.004	0.011	0.023	0.004	0.005	0.025	286.658	0.722	0.3053474E-01	0.2610865	0.4650744E-06	2.749262
12152011	11	0.013	0.054	0.036	0.002	0.004	0.003	0.007	0.014	0.013	0.007	0.025	289.864	0.642	0.5953747E-01	1.312082	0.1184104E-04	2.044571
12152011	12	0.002	0.058	0.044	0.002	0.003	0.001	0.004	0.007	0.033	0.004	0.027	291.867	0.570	0.7092953E-04	2.232399	0.2563537E-02	-0.6006765E-01
12152011	13	0.002	0.042	0.032	0.002	0.002	0.001	0.003	0.005	0.036	0.003	0.028	293.469	0.521	0.000000	1.564170	0.2827309E-02	-0.2570893
12152011	14	0.002	0.033	0.027	0.002	0.002	0.001	0.003	0.005	0.036	0.002	0.028	294.164	0.510	0.000000	1.518642	0.2915674E-02	-0.2832836
12152011	15	0.002	0.023	0.020	0.002	0.002	0.001	0.002	0.004	0.032	0.002	0.025	293.772	0.535	0.000000	1.503330	0.3103229E-02	-0.3147594
12152011	16	0.002	0.019	0.014	0.002	0.002	0.001	0.002	0.004	0.031	0.002	0.023	292.853	0.581	0.1027584E-03	1.756765	0.2372193E-02	-0.1304364
12152011	17	0.010	0.014	0.008	0.002	0.002	0.001	0.002	0.005	0.030	0.001	0.023	291.178	0.666	0.2865672E-01	1.973384	0.1618732E-03	1.086037
12152011	18	0.018	0.009	0.005	0.002	0.002	0.002	0.004	0.009	0.019	0.001	0.023	289.050	0.755	0.7648331E-01	2.156388	0.4700876E-04	1.661548
12152011	19	0.019	0.007	0.004	0.002	0.003	0.003	0.006	0.013	0.008	0.001	0.024	287.838	0.810	0.1672218	2.199925	0.1182412E-04	2.269639
12152011	20	0.019	0.007	0.004	0.003	0.003	0.003	0.007	0.017	0.002	0.002	0.024	287.007	0.817	0.2932434	1.671246	0.2088278E-05	2.903252
12152011	21	0.022	0.008	0.005	0.003	0.003	0.004	0.008	0.020	0.002	0.002	0.024	287.003	0.772	0.1365698	0.6335821	0.4717633E-06	3.128079
12152011	22	0.026	0.009	0.006	0.003	0.003	0.004	0.009	0.021	0.002	0.002	0.025	286.245	0.817	0.2026684	0.9297350	0.7336679E-06	3.102860
12152011	23	0.032	0.010	0.006	0.003	0.003	0.004	0.010	0.022	0.003	0.003	0.025	285.965	0.822	0.1903551	0.7650696	0.5632355E-06	3.133011
12152011	24	0.032	0.011	0.005	0.003	0.004	0.004	0.010	0.023	0.003	0.003	0.025	285.054	0.877	0.2566675	1.042325	0.8915700E-06	3.067848
12162011	01	0.019	0.009	0.004	0.003	0.004	0.004	0.010	0.021	0.004	0.004	0.025	284.728	0.922	0.4493369	3.128818	0.3760336E-05	2.920154
12162011	02	0.005	0.010	0.006	0.003	0.004	0.004	0.009	0.019	0.010	0.004	0.025	284.856	0.923	0.4083410	4.030422	0.8456096E-05	2.678181
12162011	03	0.003	0.015	0.010	0.003	0.005	0.003	0.007	0.016	0.015	0.004	0.025	284.539	0.927	0.000000	20.77753	0.2232174E-02	0.9688659
12162011	04	0.001	0.021	0.012	0.003	0.005	0.002	0.006	0.012	0.023	0.006	0.025	284.447	0.921	0.000000	15.79981	0.2064179E-02	0.8839046
12162011	05	0.001	0.025	0.015	0.002	0.005	0.002	0.005	0.009	0.026	0.005	0.025	284.199	0.919	0.000000	13.76852	0.1879417E-02	0.8648641
12162011	06	0.004	0.027	0.015	0.003	0.005	0.002	0.004	0.008	0.029	0.007	0.025	283.862	0.932	0.3344554	10.67435	0.1371945E-03	1.891005
12162011	07	0.008	0.027	0.012	0.004	0.005	0.002	0.005	0.008	0.033	0.012	0.025	283.892	0.920	0.4821905	10.98203	0.7608291E-04	2.159396
12162011	08	0.017	0.033	0.011	0.005	0.005	0.002	0.005	0.009	0.035	0.017	0.025	284.087	0.894	0.5565158	8.669461	0.3698788E-04	2.369933
12162011	09	0.030	0.045	0.017	0.005	0.005	0.002	0.007	0.012	0.033	0.021	0.025	284.963	0.845	0.5701768	6.476085	0.1633655E-04	2.598152
12162011	10	0.036	0.044	0.023	0.004	0.005	0.003	0.009	0.017	0.024	0.023	0.026	286.700	0.852	0.5160555	5.758785	0.1043012E-04	2.742042
12162011	11	0.015	0.036	0.031	0.003	0.005	0.003	0.008	0.016	0.018	0.013	0.027	289.491	0.793	0.1646965	2.647927	0.1028482E-04	2.410709
12162011	12	0.001	0.072	0.044	0.002	0.004	0.002	0.004	0.009	0.026	0.007	0.027	290.715	0.747	0.7724762E-04	3.476932	0.2162191E-02	0.2063021
12162011	13	0.001	0.084	0.035	0.002	0.004	0.001	0.003	0.006	0.022	0.004	0.026	291.396	0.719	0.000000	2.370333	0.4333992E-02	-0.2620787
12162011	14	0.000	0.067	0.028	0.002	0.003	0.001	0.002	0.005	0.020	0.003	0.027	291.230	0.721	0.000000	2.736792	0.3634902E-02	-0.1232509
12162011	15	0.000	0.053	0.023	0.001	0.003	0.001	0.002	0.004	0.020	0.002	0.027	289.853	0.760	0.000000	3.382484	0.4453704E-02	-0.1194856
12162011	16	0.000	0.040	0.020	0.001	0.002	0.001	0.002	0.004	0.023	0.001	0.028	288.370	0.820	0.000000	4.588379	0.5630960E-02	-0.8892312E-01
12162011	17	0.001	0.024	0.017	0.001	0.003	0.001	0.003	0.005	0.033	0.002	0.028	287.166	0.873	0.000000	5.793714	0.2703336E-02	0.3310570
12162011	18	0.003	0.017	0.016	0.001	0.003	0.001	0.003	0.004	0.039	0.003	0.026	286.258	0.914	0.1378798	8.496671	0.3017843E-03	1.449552
12162011	19	0.006	0.014	0.012	0.001	0.003	0.001	0.003	0.002	0.036	0.005	0.021	285.570	0.939	0.3476888	12.82317	0.1486031E-03	1.935967
12162011	20	0.008	0.012	0.007	0.001	0.003	0.001	0.002	0.001	0.028	0.007	0.015	284.982	0.946	0.4762689	12.84582	0.8196445E-04	2.195136
12162011	21	0.009	0.012	0.007	0.001	0.003	0.000	0.002	0.001	0.019	0.005	0.011	284.438	0.933	0.3187609	6.126942	0.4825801E-04	2.103674
12162011	22	0.007	0.013	0.009	0.001	0.002	0.000	0.002	0.001	0.013	0.003	0.008	283.860	0.920	0.2044207	3.638672	0.3650518E-04	1.998588
12162011	23	0.006	0.014	0.013	0.001	0.002	0.000	0.002	0.001	0.012	0.003	0.007	283.387	0.893	0.1474934	2.303211	0.2887723E-04	1.901778
12162011	24	0.005	0.017	0.017	0.001	0.002	0.000	0.002	0.001	0.012	0.003	0.008	282.528	0.883	0.1133769	2.353131	0.5294470E-04	1.647824
12172011	01	0.004	0.019	0.018	0.001	0.002	0.000	0.002	0.001	0.014	0.003	0.008	281.559	0.871	0.1410418	2.302608	0.4594552E-04	1.699977
12172011	02	0.004	0.018	0.017	0.001	0.002	0.000	0.001	0.001	0.015	0.003	0.009	280.779	0.868	0.1242295	2.475028	0.7932218E-04	1.494186
12172011	03	0.003	0.019	0.017	0.001	0.002	0.000	0.001	0.001	0.016	0.003	0.009	280.081	0.875	0.1446974	2.755705	0.8171055E-04	1.527955
12172011	04	0.003	0.020	0.015	0.001	0.002	0.000	0.001	0.001	0.017	0.003	0.010	279.478	0.873	0.1357278	2.716660	0.1070903E-03	1.404285
12172011	05	0.002	0.020	0.014	0.001	0.002	0.000	0.001	0.001	0.018	0.002	0.010	278.985	0.859	0.1441708	2.510089	0.9903769E-04	1.403889
12172011	06	0.001	0.021	0.012	0.001	0.002	0.000	0.001	0.001	0.020	0.001	0.012	278.399	0.855	0.8592975E-01	2.751686	0.2675535E-03	1.012188
12172011	07	0.001	0.023	0.013	0.001	0.002	0.000	0.001	0.001	0.022	0.000	0.014	277.834	0.848	0.5835891E-03	2.922485	0.7949839E-03	0.5653940
12172011	08	0.000	0.023	0.012	0.001	0.002	0.000	0.001	0.001	0.024	0.000	0.016	277.522	0.824	0.000000	2.776060	0.2367440E-02	0.6914992E-01
12172011	09	0.000	0.023	0.013	0.001	0.002	0.000	0.001	0.001	0.027	0.000	0.019	278.412	0.761	0.000000	2.465486	0.5076904E-02	-0.3136965
12172011	10	0.000	0.038	0.018	0.001	0.002	0.000	0.001	0.001	0.025	0.000	0.021	280.018	0.680	0.000000	1.977423	0.1137130E-01	-0.7597106
12172011	11	0.000	0.067	0.021	0.001	0.001	0.000	0.001	0.001	0.017	0.000	0.020	281.355	0.604	0.000000	1.499905	0.1880407E-01	-1.098188
12172011	12	0.000	0.072	0.022	0.000	0.001	0.000	0.001	0.001	0.014	0.000	0.019	282.504	0.534	0.5424023E-05	1.239317	0.2698786E-02	-0.3379861
12172011	13	0.000	0.068	0.024	0.000	0.001	0.000	0.001	0.001	0.015	0.000	0.019	283.405	0.474	0.1728535E-05	0.9421426	0.1386941E-02	-0.1679413
12172011	14	0.000	0.062	0.025	0.000	0.001	0.000	0.001	0.001	0.015	0.000	0.019	283.458	0.455	0.1370907E-05	0.9090919	0.1342720E-02	-0.1693777
12172011	15	0.000	0.064	0.027	0.000	0.001	0.000	0.001	0.001	0.016	0.000	0.020	282.900	0.459	0.1549721E-05	0.9547540	0.1378704E-02	-0.1595794
12172011	16	0.000	0.069	0.027	0.000	0.001	0.000	0.001	0.002	0.017	0.000	0.021	281.898	0.479	0.5543232E-05	0.9584879	0.7257271E-03	0.1208133
12172011	17	0.000	0.073	0.024	0.000	0.001	0.000	0.001	0.003	0.018	0.000	0.021	280.573	0.503	0.1567602E-04	0.9552060	0.1771902E-02	-0.2683426
12172011	18	0.000	0.077	0.023	0.000	0.001	0.001	0.001	0.003	0.020	0.000	0.021	279.373	0.529	0.4627109E-03	1.103725	0.1189583E-01	-1.032534
12172011	19	0.000	0.078	0.022	0.000	0.002	0.001	0.002	0.005	0.022	0.000	0.022	278.589	0.557	0.1844227E-02	1.160014	0.5867645E-02	-0.7040004
12172011	20	0.000	0.071	0.022	0.000	0.002	0.001	0.002	0.006	0.025	0.000	0.022	277.952	0.581	0.1722872E-01	1.319955	0.1636620E-02	-0.9338854E-01
12172011	21	0.001	0.062	0.023	0.000	0.002	0.001	0.002	0.006	0.027	0.000	0.023	277.328	0.600	0.3757304E-01	1.517024	0.1348112E-02	0.5126649E-01
12172011	22	0.001	0.060	0.027	0.000	0.002	0.001	0.003	0.006	0.028	0.001	0.023	276.696	0.618	0.4479170E-01	1.952322	0.1699172E-02	0.6031413E-01
12172011	23	0.001	0.058	0.030	0.000	0.002	0.001	0.003	0.006	0.028	0.001	0.024	275.989	0.638	0.3923225E-01	1.782831	0.1579763E-02	0.5251814E-01
12172011	24	0.001	0.062	0.035	0.000	0.002	0.001	0.003	0.007	0.028	0.001	0.024	275.259	0.659	0.4629618E-01	2.204396	0.1986068E-02	0.4529557E-01
12182011	01	0.001	0.068	0.038	0.000	0.002	0.001	0.003	0.007	0.027	0.001	0.024	274.541	0.680	0.4346943E-01	2.129926	0.1957856E-02	0.3658376E-01
12182011	02	0.001	0.074	0.040	0.000	0.002	0.001	0.003	0.007	0.026	0.001	0.023	273.958	0.697	0.4801923E-01	2.389545	0.2200480E-02	0.3579779E-01
12182011	03	0.000	0.082	0.040	0.000	0.002	0.001	0.003	0.007	0.025	0.001	0.023	273.628	0.707	0.3963941E-01	1.986869	0.1827949E-02	0.3620521E-01
12182011	04	0.000	0.091	0.042	0.000	0.002	0.001	0.003	0.007	0.025	0.001	0.024	273.411	0.715	0.2352458E-01	2.121799	0.2784635E-02	-0.1180641
12182011	05	0.000	0.101	0.045	0.000	0.002	0.001	0.003	0.007	0.025	0.001	0.025	273.210	0.723	0.1458508E-01	2.188768	0.4162050E-02	-0.2791076
12182011	06	0.000	0.107	0.048	0.000	0.002	0.001	0.003	0.007	0.027	0.001	0.027	272.997	0.731	0.1196694E-01	2.474674	0.5855594E-02	-0.3740529
12182011	07	0.000	0.106	0.050	0.000	0.003	0.001	0.003	0.007	0.029	0.001	0.029	272.773	0.739	0.1308662E-01	2.830001	0.6810896E-02	-0.3814177
12182011	08	0.000	0.102	0.049	0.000	0.003	0.001	0.004	0.008	0.032	0.001	0.029	273.034	0.723	0.4003698E-01	2.654694	0.2967296E-02	-0.4834650E-01
12182011	09	0.001	0.101	0.048	0.000	0.003	0.002	0.004	0.009	0.034	0.001	0.029	274.603	0.669	0.6381983E-01	3.505576	0.3388982E-02	0.1469012E-01
12182011	10	0.001	0.105	0.053	0.000	0.003	0.002	0.004	0.009	0.035	0.001	0.030	277.197	0.595	0.4475582E-01	2.758772	0.2832780E-02	-0.1149697E-01
12182011	11	0.001	0.114	0.062	0.000	0.003	0.002	0.004	0.010	0.035	0.001	0.031	280.196	0.516	0.3016424E-01	2.196563	0.2562146E-02	-0.6686028E-01
12182011	12	0.000	0.121	0.068	0.000	0.002	0.002	0.004	0.009	0.033	0.001	0.032	282.200	0.466	0.4574955E-02	1.319705	0.3407635E-02	-0.4119760
12182011	13	0.000	0.123	0.060	0.000	0.002	0.001	0.004	0.009	0.033	0.001	0.031	283.777	0.432	0.2884746E-02	1.064741	0.3443856E-02	-0.5098012
12182011	14	0.000	0.129	0.050	0.000	0.002	0.001	0.004	0.009	0.031	0.001	0.029	284.330	0.422	0.6479800E-02	0.9898676	0.2035319E-02	-0.3130554
12182011	15	0.000	0.127	0.041	0.000	0.001	0.001	0.003	0.007	0.027	0.001	0.026	283.520	0.442	0.1002431E-02	0.8780572	0.5085282E-02	-0.7627922
12182011	16	0.000	0.131	0.037	0.000	0.001	0.001	0.003	0.007	0.026	0.001	0.025	282.208	0.477	0.1796484E-02	0.9741910	0.4082452E-02	-0.6222770
12182011	17	0.001	0.135	0.033	0.000	0.001	0.001	0.003	0.007	0.026	0.001	0.024	280.473	0.520	0.1101398E-01	1.136789	0.1768980E-02	-0.1920429
12182011	18	0.001	0.137	0.032	0.000	0.001	0.001	0.003	0.008	0.026	0.001	0.024	278.835	0.568	0.2830988E-01	1.431489	0.1496120E-02	-0.1917835E-01
12182011	19	0.001	0.139	0.037	0.000	0.001	0.001	0.003	0.009	0.027	0.001	0.024	277.566	0.617	0.4006267E-01	2.115981	0.2006072E-02	0.2316536E-01
12182011	20	0.001	0.140	0.043	0.000	0.001	0.002	0.004	0.009	0.028	0.001	0.024	276.649	0.651	0.5543828E-01	3.160949	0.2846059E-02	0.4557355E-01
12182011	21	0.002	0.134	0.037	0.000	0.001	0.002	0.004	0.010	0.029	0.006	0.024	276.000	0.673	0.7407928E-01	4.104673	0.3564813E-02	0.6124189E-01
12182011	22	0.004	0.123	0.025	0.000	0.001	0.002	0.005	0.012	0.028	0.015	0.024	275.527	0.692	NaN	2.393129	0.2121751E-01	-0.9477282
12182011	23	0.005	0.114	0.023	0.000	0.002	0.002	0.005	0.014	0.028	0.019	0.024	275.162	0.708	NaN	2.721596	0.1692257E-01	-0.7936426
12182011	24	0.004	0.112	0.026	0.000	0.002	0.003	0.006	0.015	0.028	0.022	0.024	274.849	0.720	NaN	3.012044	0.1871410E-01	-0.7933075
12192011	01	0.003	0.114	0.028	0.000	0.002	0.003	0.006	0.015	0.028	0.023	0.024	274.620	0.719	NaN	2.949671	0.2292378E-01	-0.8905125
12192011	02	0.003	0.122	0.031	0.000	0.002	0.003	0.006	0.016	0.030	0.027	0.024	274.266	0.724	NaN	3.074544	0.2607277E-01	-0.9284065
12192011	03	0.002	0.139	0.042	0.000	0.002	0.003	0.006	0.016	0.033	0.032	0.024	274.079	0.726	NaN	3.345563	0.4043392E-01	-1.082277
12192011	04	0.007	0.167	0.068	0.000	0.002	0.003	0.006	0.016	0.024	0.022	0.024	273.818	0.733	NaN	3.082429	0.6083345E-01	-1.295249
12192011	05	0.005	0.187	0.077	0.000	0.002	0.003	0.006	0.017	0.020	0.014	0.024	273.540	0.745	NaN	2.941769	0.6589837E-01	-1.350266
12192011	06	0.002	0.196	0.064	0.000	0.002	0.003	0.006	0.017	0.023	0.020	0.024	273.382	0.753	NaN	2.941767	0.5885251E-01	-1.301157
12192011	07	0.003	0.204	0.057	0.000	0.002	0.003	0.006	0.018	0.025	0.025	0.025	273.255	0.761	NaN	3.316463	0.5372823E-01	-1.209527
12192011	08	0.002	0.207	0.046	0.001	0.002	0.003	0.007	0.019	0.030	0.030	0.025	273.676	0.744	0.3948293	2.939543	0.2570050E-04	2.058338
12192011	09	0.003	0.198	0.040	0.001	0.002	0.004	0.007	0.020	0.036	0.036	0.025	275.470	0.686	0.4526723	2.389606	0.9579659E-05	2.396976
12192011	10	0.007	0.182	0.056	0.001	0.002	0.003	0.007	0.019	0.035	0.035	0.025	278.630	0.583	0.3496805	1.498076	0.3424699E-05	2.640912
12192011	11	0.017	0.153	0.066	0.000	0.002	0.003	0.006	0.016	0.021	0.019	0.024	281.945	0.493	NaN	1.318664	0.4894759E-01	-1.569597
12192011	12	0.015	0.139	0.067	0.000	0.002	0.002	0.006	0.014	0.020	0.012	0.024	284.543	0.430	NaN	0.9342804	0.5199385E-01	-1.745475
12192011	13	0.013	0.140	0.072	0.000	0.002	0.002	0.005	0.011	0.021	0.005	0.025	286.404	0.390	NaN	0.8733967	0.5999903E-01	-1.836933
12192011	14	0.012	0.147	0.066	0.000	0.002	0.002	0.004	0.010	0.023	0.003	0.025	287.286	0.374	NaN	0.8496897	0.5399824E-01	-1.803119
12192011	15	0.003	0.151	0.061	0.000	0.002	0.002	0.004	0.009	0.034	0.001	0.026	286.824	0.390	NaN	0.9849633	0.4898726E-01	-1.696663
12192011	16	0.002	0.163	0.056	0.000	0.001	0.001	0.004	0.009	0.036	0.001	0.027	285.724	0.420	0.2147454E-01	1.813317	0.2740700E-02	-0.1793877
12192011	17	0.002	0.181	0.050	0.000	0.002	0.002	0.004	0.009	0.037	0.001	0.029	284.208	0.466	0.2901536E-01	2.298903	0.2772779E-02	-0.8139461E-01
12192011	18	0.011	0.184	0.030	0.000	0.002	0.002	0.005	0.011	0.031	0.004	0.029	282.405	0.523	NaN	1.680851	0.1634412E-01	-0.9878323
12192011	19	0.018	0.168	0.019	0.001	0.002	0.003	0.006	0.015	0.023	0.008	0.030	280.984	0.587	0.2909710	1.622919	0.1756113E-04	1.965744
12192011	20	0.023	0.145	0.014	0.001	0.002	0.004	0.008	0.020	0.012	0.009	0.030	280.628	0.577	0.3911026	1.232181	0.2454897E-05	2.700641
12192011	21	0.023	0.126	0.015	0.001	0.003	0.004	0.010	0.024	0.006	0.006	0.030	280.137	0.619	0.2852609	0.6248495	0.1048638E-05	2.775150
12192011	22	0.019	0.110	0.011	0.002	0.003	0.005	0.010	0.026	0.005	0.005	0.029	280.000	0.656	0.1691255	0.3462689	0.3609263E-06	2.981995
12192011	23	0.012	0.094	0.008	0.002	0.003	0.005	0.011	0.026	0.008	0.005	0.030	279.862	0.710	0.2377309	0.5871590	0.6743541E-06	2.939868
12192011	24	0.006	0.073	0.009	0.002	0.003	0.004	0.010	0.025	0.014	0.005	0.030	279.749	0.739	0.3089926	0.8971190	0.1118815E-05	2.904092
12202011	01	0.006	0.033	0.012	0.002	0.003	0.004	0.010	0.023	0.018	0.006	0.031	279.434	0.780	0.5186335	2.180413	0.4017971E-05	2.734532
12202011	02	0.005	0.016	0.018	0.002	0.003	0.004	0.010	0.021	0.021	0.008	0.031	279.880	0.765	0.5076489	2.801148	0.6390060E-05	2.641831
12202011	03	0.005	0.010	0.019	0.002	0.003	0.003	0.009	0.020	0.023	0.008	0.032	279.809	0.799	0.3073514E-02	9.693858	0.1855418E-02	0.7180548
12202011	04	0.005	0.008	0.018	0.002	0.004	0.003	0.009	0.019	0.024	0.008	0.031	279.935	0.826	0.5297121	4.278528	0.1668840E-04	2.408880
12202011	05	0.005	0.009	0.019	0.003	0.004	0.003	0.009	0.018	0.024	0.009	0.031	280.186	0.839	0.4800747	4.757946	0.2495880E-04	2.280196
12202011	06	0.007	0.011	0.017	0.003	0.004	0.003	0.009	0.018	0.022	0.014	0.030	280.517	0.850	0.4916840	5.127863	0.2411890E-04	2.327579
12202011	07	0.009	0.010	0.015	0.003	0.004	0.003	0.010	0.020	0.019	0.018	0.030	280.856	0.849	0.5324337	5.040661	0.1602279E-04	2.497749
12202011	08	0.012	0.009	0.013	0.003	0.004	0.004	0.012	0.025	0.010	0.011	0.030	281.310	0.850	0.3794324	2.484305	0.5463599E-05	2.657726
12202011	09	0.014	0.009	0.010	0.002	0.005	0.005	0.013	0.029	0.004	0.005	0.030	282.530	0.864	0.1167891	0.5250555	0.9583150E-06	2.738697
12202011	10	0.011	0.009	0.011	0.002	0.005	0.005	0.013	0.029	0.004	0.004	0.028	284.794	0.858	0.000000	0.1260003E-08	0.1000001E-13	2.100371
12202011	11	0.008	0.026	0.026	0.003	0.004	0.004	0.009	0.019	0.013	0.010	0.026	286.827	0.806	0.1689661	1.930251	0.6560275E-05	2.468692
12202011	12	0.002	0.030	0.029	0.002	0.003	0.002	0.006	0.011	0.020	0.004	0.024	287.899	0.784	0.2761483E-03	4.951687	0.2155910E-02	0.3611225
12202011	13	0.001	0.033	0.026	0.002	0.003	0.002	0.004	0.008	0.019	0.004	0.022	288.575	0.785	0.1035929E-03	3.380120	0.1718713E-02	0.2937289
12202011	14	0.001	0.039	0.025	0.002	0.002	0.001	0.004	0.006	0.020	0.003	0.021	288.753	0.780	0.000000	2.368095	0.1685461E-02	0.1476804
12202011	15	0.002	0.039	0.027	0.002	0.002	0.001	0.004	0.006	0.021	0.003	0.020	287.989	0.800	0.1298785E-03	3.464957	0.1747515E-02	0.2972769
12202011	16	0.011	0.029	0.021	0.002	0.003	0.001	0.004	0.007	0.017	0.004	0.019	287.500	0.837	0.9517062E-01	2.870935	0.5664353E-04	1.704873
12202011	17	0.017	0.021	0.014	0.002	0.003	0.002	0.005	0.010	0.010	0.006	0.019	286.974	0.879	0.2390351	3.463192	0.1586806E-04	2.338953
12202011	18	0.016	0.019	0.012	0.002	0.003	0.003	0.007	0.015	0.005	0.006	0.019	286.079	0.914	0.2956838	3.000740	0.6535039E-05	2.661980
12202011	19	0.012	0.018	0.010	0.002	0.004	0.004	0.008	0.018	0.003	0.005	0.017	285.768	0.929	0.8982420E-04	0.5489815E-03	0.4293594E-08	2.106737
12202011	20	0.009	0.017	0.006	0.003	0.004	0.004	0.009	0.018	0.003	0.008	0.016	285.630	0.939	0.3623993	2.791680	0.8726739E-05	2.505014
12202011	21	0.007	0.018	0.008	0.002	0.004	0.003	0.008	0.015	0.004	0.005	0.016	285.403	0.960	0.2315380	3.219041	0.1249200E-04	2.411095
12202011	22	0.005	0.018	0.010	0.003	0.004	0.003	0.007	0.012	0.007	0.008	0.017	285.009	0.956	0.4048204	9.991397	0.5177526E-04	2.285504
12202011	23	0.006	0.014	0.014	0.003	0.004	0.002	0.006	0.010	0.011	0.009	0.018	285.976	0.913	0.2775835	4.763325	0.2206429E-04	2.334220
12202011	24	0.007	0.013	0.016	0.003	0.003	0.002	0.006	0.008	0.014	0.006	0.019	285.889	0.918	0.2387533	6.165797	0.5141375E-04	2.078910
12212011	01	0.006	0.015	0.013	0.003	0.003	0.001	0.005	0.007	0.017	0.006	0.020	285.841	0.915	0.000000	10.94377	0.1873071E-02	0.7666125
12212011	02	0.007	0.013	0.012	0.003	0.004	0.001	0.005	0.007	0.019	0.005	0.020	285.908	0.910	0.2087754	5.715380	0.6730693E-04	1.928985
12212011	03	0.007	0.011	0.011	0.003	0.004	0.001	0.005	0.006	0.019	0.005	0.021	286.243	0.899	0.1271366	5.347968	0.1235682E-03	1.636282
12212011	04	0.007	0.010	0.009	0.003	0.004	0.001	0.005	0.007	0.020	0.004	0.021	286.367	0.911	0.1913319	5.762717	0.7596497E-04	1.880014
12212011	05	0.008	0.009	0.008	0.003	0.004	0.001	0.005	0.006	0.022	0.004	0.022	286.609	0.912	0.1781417	6.357195	0.1032492E-03	1.789379
12212011	06	0.007	0.007	0.005	0.004	0.004	0.001	0.005	0.006	0.024	0.003	0.022	286.910	0.905	0.1933636	6.254212	0.8695920E-04	1.856857
12212011	07	0.005	0.004	0.003	0.003	0.004	0.001	0.003	0.003	0.024	0.002	0.019	287.216	0.907	0.1184030	5.887579	0.1493014E-03	1.595873
12212011	08	0.002	0.002	0.003	0.003	0.002	0.001	0.001	0.001	0.018	0.001	0.012	287.749	0.904	0.5969375E-01	3.602631	0.1257187E-03	1.457220
12212011	09	0.005	0.002	0.003	0.002	0.002	0.000	0.001	0.001	0.021	0.001	0.013	288.399	0.908	0.7170957E-01	4.362549	0.1369818E-03	1.503077
12212011	10	0.007	0.002	0.003	0.002	0.003	0.000	0.001	0.001	0.023	0.001	0.015	289.581	0.917	0.8429158E-01	5.714918	0.1504923E-03	1.579496
12212011	11	0.006	0.003	0.005	0.002	0.003	0.000	0.001	0.001	0.020	0.001	0.014	290.888	0.882	0.4788083E-01	3.599043	0.1338212E-03	1.429662
12212011	12	0.001	0.007	0.005	0.001	0.001	0.000	0.000	0.001	0.011	0.000	0.009	291.057	0.869	0.000000	1.978831	0.1839490E-02	0.3171118E-01
12212011	13	0.001	0.008	0.006	0.000	0.001	0.000	0.000	0.001	0.010	0.000	0.008	290.866	0.880	0.4024088E-02	1.883318	0.1583233E-02	0.7537892E-01
12212011	14	0.001	0.008	0.008	0.000	0.001	0.000	0.000	0.001	0.009	0.000	0.008	290.728	0.886	0.2734363E-02	2.022214	0.1685501E-02	0.7909808E-01
12212011	15	0.000	0.008	0.009	0.000	0.000	0.000	0.000	0.001	0.009	0.000	0.010	290.470	0.888	0.8613467E-03	2.752294	0.3010631E-02	-0.3896275E-01
12212011	16	0.000	0.008	0.009	0.000	0.000	0.000	0.000	0.001	0.009	0.000	0.012	290.157	0.896	0.9858608E-03	3.910934	0.4768222E-02	-0.8607594E-01
12212011	17	0.000	0.008	0.007	0.000	0.000	0.000	0.000	0.001	0.011	0.000	0.014	289.562	0.901	0.1286149E-02	4.579831	0.5434948E-02	-0.7434595E-01
12212011	18	0.003	0.008	0.006	0.000	0.000	0.000	0.001	0.002	0.018	0.000	0.015	287.947	0.934	0.2389002E-01	5.899457	0.2290912E-02	0.4108036
12212011	19	0.015	0.006	0.005	0.001	0.001	0.001	0.003	0.005	0.012	0.001	0.012	286.812	0.945	0.3934382	5.904273	0.1776331E-04	2.521643
12212011	20	0.021	0.006	0.006	0.001	0.001	0.001	0.004	0.008	0.002	0.002	0.010	286.077	0.911	0.2211417	1.231356	0.1446086E-05	2.930189
12212011	21	0.020	0.007	0.007	0.002	0.001	0.002	0.005	0.009	0.001	0.001	0.009	285.452	0.932	0.8940697E-04	0.3127013E-03	0.1670002E-08	2.272413
12212011	22	0.014	0.006	0.003	0.003	0.001	0.002	0.005	0.010	0.001	0.005	0.008	285.498	0.890	NaN	2.928310	0.1664129E-09	7.245430
12212011	23	0.009	0.007	0.001	0.006	0.001	0.002	0.005	0.010	0.003	0.012	0.008	285.377	0.933	NaN	7.463319	0.3118804E-04	2.378944
12212011	24	0.007	0.011	0.009	0.002	0.001	0.002	0.004	0.008	0.001	0.001	0.008	285.127	0.939	0.8523464E-04	0.4310733E-03	0.5355585E-08	1.905744
12222011	01	0.006	0.019	0.007	0.002	0.001	0.001	0.003	0.006	0.001	0.001	0.007	284.647	0.955	0.1688110	1.979502	0.6704063E-05	2.470218
12222011	02	0.007	0.026	0.008	0.002	0.001	0.001	0.003	0.005	0.003	0.003	0.007	284.329	0.947	0.2721887	3.198202	0.1060954E-04	2.479209
12222011	03	0.009	0.034	0.010	0.002	0.001	0.001	0.003	0.004	0.005	0.004	0.007	284.240	0.940	0.3514316	3.982778	0.1220179E-04	2.513762
12222011	04	0.011	0.044	0.012	0.002	0.001	0.001	0.003	0.003	0.008	0.005	0.007	284.152	0.942	0.4032868	5.425901	0.1936796E-04	2.447388
12222011	05	0.013	0.049	0.013	0.002	0.001	0.001	0.003	0.002	0.011	0.007	0.007	284.115	0.945	0.5144486	9.267578	0.3664226E-04	2.402984
12222011	06	0.014	0.045	0.013	0.002	0.002	0.001	0.003	0.002	0.014	0.010	0.006	284.215	0.943	0.5707280	8.393654	0.2492816E-04	2.527261
12222011	07	0.018	0.035	0.012	0.002	0.002	0.001	0.003	0.002	0.016	0.012	0.006	284.368	0.939	0.6419376	9.495772	0.2375895E-04	2.601703
12222011	08	0.023	0.029	0.011	0.002	0.002	0.001	0.003	0.001	0.016	0.013	0.006	284.737	0.926	0.6108176	8.169182	0.1910415E-04	2.631051
12222011	09	0.028	0.024	0.014	0.002	0.002	0.001	0.004	0.001	0.014	0.011	0.006	286.643	0.905	0.4606965	5.177806	0.1086034E-04	2.678303
12222011	10	0.018	0.015	0.018	0.001	0.003	0.001	0.004	0.001	0.007	0.005	0.006	289.531	0.903	0.1857540	2.680453	0.7618387E-05	2.546345
12222011	11	0.008	0.020	0.017	0.001	0.003	0.001	0.003	0.001	0.007	0.001	0.007	291.794	0.827	0.2630973E-01	1.293486	0.2029661E-04	1.804338
12222011	12	0.001	0.020	0.016	0.001	0.001	0.000	0.001	0.001	0.008	0.000	0.008	292.566	0.787	0.000000	1.075417	0.1727396E-02	-0.2058150
12222011	13	0.000	0.015	0.015	0.000	0.001	0.000	0.001	0.001	0.007	0.000	0.008	293.188	0.761	0.1597404E-03	0.9883329	0.1460982E-02	-0.1697417
12222011	14	0.000	0.013	0.012	0.000	0.001	0.000	0.000	0.001	0.007	0.000	0.007	293.033	0.756	0.1376867E-03	0.8425396	0.1826974E-02	-0.3361419
12222011	15	0.001	0.011	0.009	0.000	0.000	0.000	0.000	0.001	0.008	0.000	0.006	292.561	0.755	0.1023710E-02	0.6966206	0.1393940E-02	-0.3012478
12222011	16	0.009	0.006	0.006	0.000	0.000	0.000	0.001	0.002	0.005	0.000	0.006	291.308	0.796	NaN	1.219784	0.2547796E-03	0.6801183
12222011	17	0.018	0.003	0.004	0.001	0.001	0.001	0.002	0.004	0.002	0.000	0.006	290.002	0.857	0.9895307E-01	0.5541379	0.6022761E-06	2.963822
12222011	18	0.019	0.000	0.003	0.000	0.000	0.000	0.001	0.002	0.006	0.000	0.006	289.069	0.914	NaN	2.259933	0.2182311E-04	2.015179
12222011	19	0.022	0.001	0.003	0.000	0.000	0.000	0.001	0.001	0.005	0.000	0.004	288.579	0.924	NaN	2.164638	0.1272871E-04	2.230601
12222011	20	0.024	0.002	0.003	0.000	0.001	0.000	0.001	0.001	0.005	0.000	0.004	287.960	0.926	NaN	2.512179	0.9445791E-05	2.424812
12222011	21	0.027	0.002	0.003	0.000	0.001	0.000	0.002	0.000	0.006	0.001	0.004	286.975	0.938	NaN	3.954616	0.1016516E-04	2.589990
12222011	22	0.030	0.003	0.004	0.001	0.001	0.000	0.002	0.000	0.007	0.001	0.005	285.919	0.900	0.2298592	1.937046	0.7863868E-05	2.391504
12222011	23	0.021	0.002	0.005	0.000	0.001	0.000	0.002	0.000	0.012	0.002	0.007	284.661	0.916	NaN	5.064390	0.2506377E-04	2.305481
12222011	24	0.014	0.002	0.006	0.001	0.001	0.000	0.002	0.000	0.022	0.003	0.012	283.730	0.908	0.3350566	5.211310	0.4684703E-04	2.046265
12232011	01	0.011	0.002	0.009	0.001	0.001	0.000	0.002	0.000	0.033	0.006	0.016	282.875	0.898	0.3714119	6.602258	0.7745588E-04	1.930638
12232011	02	0.009	0.004	0.013	0.001	0.002	0.000	0.002	0.000	0.042	0.010	0.019	282.211	0.892	0.3997140	7.675199	0.1050771E-03	1.863581
12232011	03	0.009	0.006	0.016	0.001	0.002	0.000	0.002	0.001	0.046	0.013	0.019	281.849	0.874	0.4485443	6.904695	0.7623393E-04	1.956996
12232011	04	0.009	0.008	0.016	0.001	0.002	0.000	0.002	0.001	0.045	0.014	0.019	281.517	0.877	0.4537923	7.617141	0.8790349E-04	1.937786
12232011	05	0.009	0.009	0.015	0.001	0.003	0.000	0.002	0.001	0.041	0.014	0.017	281.249	0.887	0.4972745	7.961277	0.7368690E-04	2.033592
12232011	06	0.008	0.012	0.014	0.001	0.003	0.000	0.002	0.000	0.032	0.012	0.014	281.003	0.894	0.3999318	6.465859	0.7787879E-04	1.919207
12232011	07	0.006	0.021	0.018	0.001	0.002	0.000	0.002	0.000	0.021	0.009	0.009	280.726	0.897	0.2993538	4.925844	0.6350619E-04	1.889665
12232011	08	0.004	0.036	0.025	0.000	0.002	0.000	0.001	0.000	0.011	0.006	0.005	280.499	0.895	NaN	3.596498	0.2159496E-01	-0.7784725
12232011	09	0.004	0.048	0.029	0.000	0.002	0.000	0.001	0.000	0.007	0.004	0.003	281.215	0.890	NaN	2.638598	0.2440662E-01	-0.9661343
12232011	10	0.004	0.052	0.028	0.000	0.001	0.000	0.001	0.000	0.005	0.002	0.003	283.223	0.790	NaN	0.9628873	0.2496054E-01	-1.413679
12232011	11	0.002	0.065	0.032	0.000	0.001	0.000	0.001	0.000	0.006	0.000	0.004	284.042	0.735	NaN	0.6808286	0.2999440E-01	-1.644002
12232011	12	0.000	0.075	0.036	0.000	0.001	0.000	0.001	0.000	0.008	0.000	0.006	284.671	0.692	0.6220937E-03	0.6200030	0.1849427E-02	-0.4746435
12232011	13	0.000	0.066	0.037	0.000	0.001	0.000	0.001	0.001	0.010	0.000	0.008	285.069	0.656	0.7637143E-03	0.6570355	0.1966113E-02	-0.4760197
12232011	14	0.000	0.059	0.040	0.000	0.001	0.000	0.001	0.001	0.012	0.000	0.010	284.915	0.646	0.4163980E-03	0.7708609	0.3782253E-02	-0.6907746
12232011	15	0.000	0.057	0.042	0.000	0.001	0.000	0.001	0.001	0.013	0.000	0.014	284.420	0.646	0.1970530E-03	1.191720	0.1055947E-01	-0.9474679
12232011	16	0.000	0.055	0.041	0.000	0.001	0.000	0.001	0.002	0.015	0.000	0.018	283.743	0.650	0.2154112E-03	1.486042	0.1452265E-01	-0.9900150
12232011	17	0.000	0.054	0.038	0.000	0.001	0.000	0.001	0.003	0.017	0.000	0.022	282.651	0.664	0.2945065E-03	1.882386	0.1844836E-01	-0.9912491
12232011	18	0.000	0.046	0.032	0.000	0.001	0.001	0.002	0.004	0.020	0.000	0.025	281.585	0.689	0.6476045E-03	2.296304	0.1556974E-01	-0.8312522
12232011	19	0.000	0.034	0.030	0.000	0.001	0.001	0.002	0.005	0.025	0.001	0.028	280.820	0.720	0.1267672E-02	2.753862	0.1401661E-01	-0.7067009
12232011	20	0.000	0.030	0.033	0.000	0.002	0.001	0.003	0.006	0.030	0.001	0.031	280.273	0.743	0.2831101E-02	3.163157	0.1070206E-01	-0.5293466
12232011	21	0.000	0.029	0.036	0.000	0.002	0.001	0.003	0.007	0.034	0.001	0.033	279.908	0.753	0.4669785E-02	3.369654	0.8960874E-02	-0.4247651
12232011	22	0.000	0.031	0.039	0.000	0.002	0.001	0.004	0.007	0.039	0.002	0.035	279.525	0.768	0.9650350E-02	4.020612	0.7100194E-02	-0.2469780
12232011	23	0.000	0.034	0.042	0.000	0.002	0.001	0.004	0.008	0.042	0.002	0.037	279.145	0.778	0.1386786E-01	4.379589	0.6490778E-02	-0.1708634
12232011	24	0.000	0.032	0.039	0.000	0.002	0.002	0.004	0.008	0.046	0.002	0.039	278.791	0.788	0.2527410E-01	5.012994	0.5304968E-02	-0.2458557E-01
12242011	01	0.000	0.028	0.033	0.001	0.003	0.002	0.004	0.009	0.051	0.003	0.043	278.388	0.802	0.000000	5.774293	0.4338368E-02	0.1241724
12242011	02	0.000	0.028	0.034	0.001	0.003	0.002	0.005	0.009	0.056	0.003	0.048	278.018	0.811	0.000000	6.838741	0.6869247E-02	-0.1932998E-02
12242011	03	0.000	0.036	0.046	0.001	0.003	0.001	0.004	0.008	0.056	0.004	0.055	277.690	0.819	0.000000	8.625607	0.2056567E-01	-0.3773531
12242011	04	0.000	0.045	0.065	0.001	0.003	0.001	0.004	0.008	0.053	0.005	0.063	277.374	0.827	0.7232130E-02	11.11232	0.3303328E-01	-0.4731469
12242011	05	0.000	0.046	0.070	0.001	0.003	0.001	0.004	0.008	0.051	0.005	0.067	277.091	0.834	0.6316066E-02	12.19624	0.4005164E-01	-0.5163945
12242011	06	0.000	0.048	0.072	0.001	0.002	0.001	0.004	0.007	0.049	0.005	0.069	276.781	0.841	0.6646156E-02	14.14277	0.3955804E-01	-0.4467002
12242011	07	0.000	0.050	0.074	0.001	0.002	0.001	0.004	0.008	0.047	0.005	0.069	276.448	0.846	0.7685363E-02	14.85617	0.3711454E-01	-0.3976373
12242011	08	0.000	0.050	0.072	0.000	0.002	0.001	0.004	0.008	0.047	0.005	0.070	276.464	0.840	0.6577134E-02	14.34266	0.4079363E-01	-0.4539628
12242011	09	0.000	0.053	0.073	0.000	0.002	0.001	0.005	0.008	0.049	0.005	0.070	277.736	0.795	0.4156530E-02	11.43468	0.5259348E-01	-0.6627079
12242011	10	0.000	0.077	0.093	0.000	0.002	0.001	0.004	0.008	0.050	0.005	0.071	279.756	0.736	0.2137601E-02	9.012909	0.6221331E-01	-0.8390183
12242011	11	0.000	0.091	0.096	0.000	0.002	0.001	0.004	0.007	0.048	0.004	0.067	281.679	0.674	0.3037453E-03	6.549357	0.1487658E-01	-0.3563043
12242011	12	0.000	0.100	0.084	0.000	0.002	0.001	0.003	0.006	0.039	0.003	0.051	283.081	0.634	0.1664162E-03	4.070240	0.7799868E-02	-0.2824672
12242011	13	0.000	0.108	0.076	0.000	0.002	0.001	0.003	0.007	0.038	0.003	0.047	284.263	0.597	0.1409054E-03	3.121640	0.5111803E-02	-0.2141913
12242011	14	0.000	0.107	0.068	0.000	0.002	0.001	0.003	0.007	0.041	0.003	0.046	284.518	0.595	0.5216002E-03	2.988276	0.2901582E-01	-0.9872141
12242011	15	0.000	0.100	0.062	0.000	0.001	0.001	0.003	0.007	0.038	0.003	0.040	284.128	0.613	0.6469488E-03	2.560418	0.2102580E-01	-0.9144417
12242011	16	0.000	0.099	0.058	0.000	0.001	0.001	0.003	0.007	0.036	0.003	0.037	283.347	0.645	0.1003623E-02	2.671082	0.1664144E-01	-0.7945037
12242011	17	0.000	0.100	0.053	0.000	0.001	0.001	0.003	0.008	0.037	0.002	0.037	282.289	0.681	0.1735508E-02	2.849115	0.1343095E-01	-0.6733968
12242011	18	0.000	0.090	0.050	0.000	0.001	0.001	0.004	0.009	0.039	0.002	0.037	281.270	0.723	0.4685640E-02	3.233265	0.8286426E-02	-0.4087259
12242011	19	0.001	0.058	0.041	0.000	0.002	0.002	0.005	0.011	0.042	0.002	0.037	280.467	0.776	0.5487770E-01	4.789238	0.2983733E-02	0.2055065
12242011	20	0.002	0.033	0.034	0.000	0.002	0.002	0.005	0.013	0.045	0.002	0.038	279.821	0.815	0.9457016E-01	7.805893	0.4033227E-02	0.2867699
12242011	21	0.005	0.020	0.020	0.001	0.002	0.003	0.006	0.016	0.045	0.011	0.038	279.341	0.823	0.4484653	5.849020	0.8520651E-04	1.836610
12242011	22	0.008	0.014	0.014	0.001	0.002	0.003	0.007	0.019	0.041	0.018	0.038	278.929	0.824	0.5529979	5.733117	0.4719291E-04	2.084514
12242011	23	0.008	0.012	0.013	0.001	0.002	0.004	0.008	0.021	0.039	0.022	0.038	278.541	0.830	0.6307291	6.266079	0.3394117E-04	2.266269
12242011	24	0.006	0.011	0.018	0.001	0.002	0.004	0.008	0.021	0.040	0.023	0.038	278.244	0.825	0.5750751	6.436615	0.4668879E-04	2.139445
12252011	01	0.004	0.012	0.026	0.001	0.002	0.003	0.008	0.020	0.041	0.024	0.037	277.951	0.822	0.4573227	5.914838	0.7219845E-04	1.913415
12252011	02	0.003	0.013	0.036	0.000	0.002	0.003	0.007	0.019	0.042	0.025	0.036	277.714	0.821	NaN	6.265047	0.3167190E-01	-0.7037498
12252011	03	0.003	0.013	0.037	0.001	0.002	0.003	0.007	0.020	0.042	0.029	0.035	277.677	0.823	0.4082819	6.004289	0.8652249E-04	1.841333
12252011	04	0.004	0.011	0.032	0.001	0.002	0.004	0.008	0.021	0.041	0.033	0.034	277.759	0.823	0.5043525	6.348670	0.5363368E-04	2.073245
12252011	05	0.005	0.010	0.028	0.001	0.002	0.004	0.008	0.023	0.040	0.037	0.033	277.968	0.822	0.5732864	6.312476	0.3440972E-04	2.263519
12252011	06	0.005	0.012	0.030	0.001	0.002	0.004	0.009	0.024	0.041	0.041	0.033	278.587	0.811	0.5558977	5.954736	0.2893353E-04	2.313461
12252011	07	0.005	0.020	0.037	0.001	0.002	0.004	0.009	0.024	0.042	0.043	0.032	279.305	0.795	0.5012859	5.446455	0.2742001E-04	2.298046
12252011	08	0.005	0.031	0.043	0.001	0.002	0.004	0.009	0.023	0.045	0.045	0.033	279.675	0.806	0.4888569	6.521317	0.4008097E-04	2.211397
12252011	09	0.005	0.040	0.047	0.001	0.002	0.004	0.009	0.022	0.049	0.046	0.033	280.008	0.836	0.4941276	8.561220	0.6746959E-04	2.103428
12252011	10	0.003	0.062	0.062	0.001	0.002	0.003	0.008	0.019	0.052	0.042	0.033	280.460	0.867	0.3864880	10.59404	0.1646273E-03	1.808560
12252011	11	0.002	0.091	0.077	0.001	0.002	0.003	0.007	0.016	0.052	0.035	0.034	280.829	0.907	0.2905001	15.20474	0.4878305E-03	1.493710
12252011	12	0.001	0.089	0.068	0.001	0.002	0.003	0.007	0.015	0.051	0.033	0.033	281.236	0.939	0.3140910	22.96104	0.8382447E-03	1.437621
12252011	13	0.001	0.075	0.056	0.000	0.002	0.002	0.006	0.013	0.044	0.022	0.032	281.730	0.952	NaN	22.70530	0.4847814E-01	-0.3294186
12252011	14	0.000	0.061	0.057	0.000	0.001	0.002	0.006	0.012	0.043	0.014	0.035	281.641	0.972	0.1933138	43.86876	0.1397175E-01	0.4969046
12252011	15	0.000	0.048	0.057	0.000	0.002	0.002	0.006	0.013	0.044	0.011	0.042	281.458	0.980	0.1970754	49.57948	0.1429507E-01	0.5401156
12252011	16	0.000	0.041	0.056	0.000	0.002	0.002	0.006	0.014	0.045	0.011	0.049	281.207	0.982	0.1980055	58.93908	0.1845067E-01	0.5043912
12252011	17	0.000	0.040	0.055	0.000	0.002	0.003	0.007	0.015	0.046	0.011	0.057	280.835	0.988	0.3749408	142.9058	0.3522912E-01	0.6081480
12252011	18	0.000	0.038	0.054	0.000	0.003	0.003	0.007	0.016	0.047	0.011	0.066	280.530	0.990	0.4049992	171.6915	0.4397283E-01	0.5915643
12252011	19	0.000	0.026	0.054	0.000	0.003	0.003	0.007	0.017	0.047	0.011	0.083	280.400	0.990	0.4379115	228.1915	0.6381759E-01	0.5533590
12252011	20	0.000	0.016	0.051	0.000	0.003	0.003	0.007	0.017	0.046	0.011	0.093	280.212	0.987	0.4621909	263.9058	0.7639831E-01	0.5383652
12252011	21	0.000	0.012	0.047	0.000	0.004	0.003	0.007	0.017	0.045	0.010	0.093	279.979	0.968	0.1431687	85.89368	0.5074096E-01	0.2286026
12252011	22	0.000	0.013	0.044	0.001	0.003	0.003	0.006	0.015	0.040	0.009	0.082	279.695	0.945	0.5930370E-01	45.86197	0.3896707E-01	0.7075493E-01
12252011	23	0.000	0.014	0.046	0.000	0.003	0.002	0.005	0.013	0.035	0.007	0.067	279.340	0.929	0.2879792E-01	26.71020	0.2815388E-01	-0.2286120E-01
12252011	24	0.000	0.015	0.044	0.000	0.003	0.002	0.004	0.010	0.031	0.006	0.053	278.627	0.925	0.2841312E-01	20.74692	0.2029428E-01	0.9580140E-02
12262011	01	0.000	0.010	0.031	0.000	0.003	0.002	0.004	0.010	0.035	0.005	0.045	277.854	0.922	0.3431028E-01	14.08013	0.1143101E-01	0.9052193E-01
12262011	02	0.000	0.009	0.025	0.000	0.003	0.002	0.005	0.010	0.040	0.005	0.039	277.223	0.939	0.1155476	15.36825	0.6149689E-02	0.3977711
12262011	03	0.000	0.011	0.022	0.001	0.003	0.002	0.005	0.011	0.044	0.014	0.033	276.759	0.952	0.2626042	30.10099	0.9838941E-02	0.4856325
12262011	04	0.001	0.016	0.026	0.001	0.003	0.002	0.006	0.012	0.045	0.027	0.029	276.866	0.922	0.4590800	14.47401	0.3549983E-03	1.610363
12262011	05	0.001	0.026	0.039	0.001	0.002	0.002	0.006	0.012	0.043	0.030	0.025	276.533	0.943	0.4406223	20.04828	0.6707230E-03	1.475534
12262011	06	0.000	0.034	0.044	0.001	0.002	0.002	0.005	0.010	0.039	0.028	0.023	276.151	0.968	0.3920210	37.12732	0.2656194E-02	1.145434
12262011	07	0.000	0.044	0.045	0.001	0.001	0.002	0.004	0.009	0.036	0.025	0.021	275.736	0.983	0.4039862	50.66765	0.4808449E-02	1.022726
12262011	08	0.000	0.038	0.036	0.001	0.001	0.002	0.005	0.008	0.038	0.027	0.020	275.475	0.968	0.4352849	35.96189	0.2253902E-02	1.202907
12262011	09	0.001	0.028	0.027	0.002	0.001	0.002	0.005	0.008	0.042	0.031	0.020	276.568	0.908	0.4733331	11.96262	0.2318822E-03	1.712559
12262011	10	0.003	0.033	0.029	0.002	0.001	0.002	0.005	0.008	0.040	0.027	0.020	278.488	0.813	0.4208736	4.771343	0.4754233E-04	2.001560
12262011	11	0.005	0.040	0.029	0.001	0.001	0.001	0.004	0.007	0.028	0.017	0.018	279.954	0.747	0.2402393	2.372547	0.3640945E-04	1.814001
12262011	12	0.007	0.034	0.026	0.001	0.001	0.001	0.003	0.006	0.018	0.010	0.015	281.277	0.683	0.1235777	1.246547	0.2936878E-04	1.627823
12262011	13	0.010	0.030	0.027	0.001	0.001	0.001	0.003	0.006	0.016	0.009	0.014	282.331	0.628	0.1031966	0.9265233	0.1887227E-04	1.691032
12262011	14	0.012	0.034	0.032	0.001	0.001	0.001	0.002	0.005	0.015	0.008	0.012	282.910	0.592	0.8470577E-01	0.7379242	0.1531244E-04	1.682967
12262011	15	0.015	0.044	0.037	0.001	0.001	0.001	0.003	0.005	0.018	0.009	0.013	283.126	0.548	0.9928507E-01	0.7355249	0.1268430E-04	1.763331
12262011	16	0.015	0.055	0.037	0.001	0.001	0.001	0.003	0.006	0.021	0.009	0.017	282.824	0.521	0.1010324	0.8721491	0.2649209E-04	1.517475
12262011	17	0.014	0.056	0.032	0.001	0.001	0.002	0.003	0.007	0.022	0.008	0.019	282.443	0.507	0.1206015	0.9724764	0.2531901E-04	1.584432
12262011	18	0.012	0.046	0.029	0.001	0.001	0.002	0.004	0.009	0.021	0.006	0.021	282.293	0.493	0.1072913	0.8694538	0.2578313E-04	1.527911
12262011	19	0.010	0.042	0.035	0.001	0.002	0.002	0.004	0.009	0.023	0.007	0.023	282.343	0.482	0.9489971E-01	0.9865758	0.4313989E-04	1.359251
12262011	20	0.008	0.047	0.038	0.002	0.002	0.002	0.004	0.009	0.026	0.006	0.024	282.281	0.495	0.9597182E-01	1.118425	0.5409876E-04	1.315420
12262011	21	0.004	0.062	0.039	0.002	0.002	0.002	0.004	0.008	0.028	0.004	0.023	282.021	0.538	0.9449404E-01	1.258575	0.6500004E-04	1.286965
12262011	22	0.001	0.089	0.039	0.003	0.002	0.001	0.004	0.008	0.028	0.003	0.023	281.698	0.592	0.3449917E-03	2.431307	0.1432296E-02	0.2298072
12262011	23	0.001	0.102	0.037	0.003	0.002	0.001	0.004	0.008	0.027	0.003	0.024	281.338	0.652	0.2753139E-03	2.417013	0.1263219E-02	0.2818004
12262011	24	0.001	0.096	0.033	0.004	0.002	0.001	0.004	0.008	0.027	0.003	0.026	281.107	0.712	0.1653433E-03	2.214626	0.1049154E-02	0.3244613
12272011	01	0.001	0.077	0.030	0.005	0.002	0.001	0.004	0.008	0.027	0.003	0.027	280.962	0.770	0.000000	2.850547	0.1853568E-02	0.1869198
12272011	02	0.001	0.060	0.027	0.004	0.002	0.001	0.004	0.008	0.027	0.003	0.028	280.500	0.874	0.000000	5.003571	0.2406788E-02	0.3178423
12272011	03	0.000	0.034	0.010	0.001	0.001	0.001	0.002	0.003	0.012	0.000	0.014	280.239	0.940	0.000000	5.754344	0.2082084E-02	0.4414977
12272011	04	0.000	0.027	0.005	0.000	0.000	0.000	0.000	0.001	0.004	0.000	0.004	280.419	0.950	0.7072449E-02	1.923718	0.9675823E-03	0.2984534
12272011	05	0.001	0.021	0.002	0.000	0.000	0.000	0.000	0.000	0.001	0.000	0.001	280.667	0.954	0.3883898E-02	0.6622517	0.1206092E-03	0.7396427
12272011	06	0.001	0.014	0.002	0.000	0.000	0.000	0.000	0.000	0.001	0.000	0.001	280.986	0.956	0.5191028E-02	0.8403361	0.1198368E-03	0.8458630
12272011	07	0.004	0.008	0.002	0.000	0.000	0.000	0.000	0.000	0.001	0.000	0.000	281.360	0.955	0.000000	0.1000000E-10	0.2043231E-15	1.689683
12272011	08	0.007	0.006	0.003	0.000	0.000	0.000	0.000	0.000	0.001	0.000	0.000	281.594	0.943	0.000000	0.1000000E-10	0.1374773E-15	1.861769
12272011	09	0.005	0.009	0.005	0.000	0.001	0.000	0.001	0.000	0.002	0.001	0.002	281.454	0.922	NaN	2.360615	0.6751064E-03	0.5436529
12272011	10	0.001	0.014	0.010	0.001	0.001	0.000	0.001	0.001	0.010	0.000	0.009	281.066	0.900	0.000000	2.526423	0.1602983E-02	0.1975770
12272011	11	0.000	0.014	0.010	0.000	0.001	0.000	0.001	0.001	0.010	0.000	0.013	280.747	0.874	0.1708090E-02	3.197511	0.5118215E-02	-0.2043065
12272011	12	0.000	0.011	0.010	0.000	0.001	0.000	0.001	0.001	0.011	0.000	0.011	280.477	0.850	0.2001405E-02	2.213137	0.3781483E-02	-0.2326539
12272011	13	0.001	0.010	0.009	0.001	0.002	0.000	0.001	0.001	0.011	0.000	0.008	280.214	0.819	0.2777576E-03	1.719722	0.7366847E-03	0.3681766
12272011	14	0.001	0.012	0.008	0.001	0.002	0.000	0.001	0.001	0.010	0.000	0.008	280.642	0.774	0.1665354E-03	1.076233	0.6375892E-03	0.2273652
12272011	15	0.000	0.015	0.010	0.001	0.002	0.000	0.001	0.001	0.009	0.000	0.008	279.960	0.766	0.000000	1.023273	0.1679900E-02	-0.2152917
12272011	16	0.000	0.014	0.011	0.001	0.001	0.000	0.001	0.001	0.009	0.000	0.010	279.664	0.761	0.000000	1.276103	0.6053619E-02	-0.6761295
12272011	17	0.000	0.014	0.014	0.001	0.001	0.000	0.001	0.001	0.011	0.000	0.016	279.372	0.759	0.000000	2.377950	0.1522621E-01	-0.8063889
12272011	18	0.000	0.017	0.020	0.001	0.001	0.001	0.001	0.004	0.013	0.000	0.025	279.250	0.763	0.000000	3.569546	0.2116387E-01	-0.7729820
12272011	19	0.000	0.023	0.033	0.001	0.002	0.001	0.003	0.007	0.016	0.001	0.033	279.175	0.762	0.000000	4.255058	0.2426374E-01	-0.7560522
12272011	20	0.000	0.021	0.036	0.001	0.002	0.001	0.003	0.008	0.019	0.001	0.038	279.004	0.756	0.000000	4.921455	0.2902823E-01	-0.7707270
12272011	21	0.000	0.012	0.025	0.002	0.002	0.001	0.003	0.007	0.020	0.003	0.034	278.942	0.758	0.000000	4.126373	0.2316131E-01	-0.7491946
12272011	22	0.000	0.006	0.018	0.003	0.002	0.001	0.002	0.005	0.017	0.004	0.030	278.858	0.758	0.000000	4.001335	0.2327313E-01	-0.7646499
12272011	23	0.000	0.003	0.015	0.003	0.002	0.001	0.002	0.004	0.016	0.004	0.028	278.131	0.759	0.000000	3.857450	0.2265574E-01	-0.7688780
12272011	24	0.000	0.003	0.012	0.004	0.003	0.001	0.002	0.004	0.017	0.004	0.027	277.949	0.744	0.000000	3.292811	0.2009434E-01	-0.7855069
12282011	01	0.000	0.004	0.012	0.004	0.003	0.001	0.002	0.004	0.017	0.003	0.026	277.844	0.738	0.000000	2.993858	0.1818258E-01	-0.7834243
12282011	02	0.000	0.005	0.012	0.004	0.003	0.001	0.002	0.003	0.018	0.003	0.026	277.521	0.744	0.000000	3.125784	0.1920205E-01	-0.7883885
12282011	03	0.000	0.007	0.013	0.004	0.004	0.001	0.002	0.004	0.021	0.004	0.026	277.054	0.753	0.000000	3.062767	0.1309083E-01	-0.6308534
12282011	04	0.000	0.009	0.015	0.003	0.004	0.001	0.002	0.004	0.024	0.004	0.025	276.501	0.764	0.000000	2.947431	0.8401413E-02	-0.4549087
12282011	05	0.000	0.012	0.017	0.003	0.005	0.001	0.002	0.004	0.025	0.004	0.024	275.895	0.778	0.000000	3.090044	0.4788626E-02	-0.1902463
12282011	06	0.000	0.013	0.018	0.002	0.005	0.001	0.003	0.004	0.026	0.004	0.023	275.234	0.793	0.000000	3.158800	0.1736005E-02	0.2599711
12282011	07	0.001	0.013	0.019	0.002	0.006	0.001	0.003	0.004	0.026	0.004	0.022	274.566	0.806	0.1179576E-02	4.057938	0.7714027E-03	0.7210243
12282011	08	0.001	0.013	0.017	0.002	0.006	0.001	0.003	0.004	0.027	0.005	0.022	274.272	0.788	0.1546621E-02	4.045861	0.8004300E-03	0.7036876
12282011	09	0.002	0.012	0.013	0.003	0.006	0.001	0.003	0.004	0.028	0.010	0.021	275.465	0.733	0.2265018	2.667716	0.1655976E-03	1.207085
12282011	10	0.001	0.028	0.030	0.002	0.007	0.001	0.003	0.004	0.026	0.007	0.021	277.642	0.650	0.9929824E-01	1.980909	0.2505054E-03	0.8980475
12282011	11	0.001	0.053	0.046	0.001	0.006	0.001	0.002	0.004	0.019	0.003	0.019	279.497	0.576	0.1111627E-03	1.344533	0.7828240E-03	0.2349074
12282011	12	0.001	0.050	0.042	0.001	0.005	0.001	0.002	0.004	0.017	0.002	0.017	281.299	0.501	0.8231401E-04	1.069466	0.8868885E-03	0.8129786E-01
12282011	13	0.001	0.042	0.037	0.000	0.004	0.001	0.002	0.003	0.015	0.001	0.015	282.801	0.442	0.1105410E-01	0.7298207	0.1079357E-02	-0.1699488
12282011	14	0.001	0.039	0.037	0.000	0.004	0.001	0.002	0.003	0.015	0.001	0.014	283.332	0.424	0.1307386E-01	0.8430901	0.1298593E-02	-0.1875992
12282011	15	0.001	0.038	0.037	0.000	0.004	0.001	0.002	0.003	0.014	0.001	0.014	282.785	0.441	0.1204860E-01	0.7837583	0.1152150E-02	-0.1673269
12282011	16	0.001	0.035	0.034	0.000	0.004	0.001	0.002	0.003	0.014	0.001	0.013	281.737	0.477	0.1784444E-01	1.056397	0.1335948E-02	-0.1019626
12282011	17	0.001	0.034	0.032	0.000	0.003	0.001	0.002	0.003	0.014	0.000	0.012	280.284	0.524	NaN	0.7795920	0.2798488E-01	-1.555056
12282011	18	0.003	0.033	0.028	0.000	0.003	0.001	0.002	0.004	0.012	0.002	0.012	278.888	0.580	NaN	0.9166274	0.2395863E-01	-1.417269
12282011	19	0.006	0.029	0.021	0.000	0.003	0.001	0.002	0.005	0.010	0.004	0.012	277.681	0.660	NaN	1.222634	0.1575919E-01	-1.110237
12282011	20	0.006	0.026	0.016	0.000	0.003	0.001	0.003	0.006	0.010	0.006	0.012	276.792	0.718	NaN	1.572637	0.9313762E-02	-0.7724965
12282011	21	0.005	0.022	0.014	0.001	0.003	0.001	0.003	0.006	0.010	0.007	0.013	276.047	0.751	0.2482412	1.437013	0.2153224E-04	1.824371
12282011	22	0.005	0.019	0.012	0.001	0.003	0.001	0.003	0.007	0.011	0.008	0.013	275.327	0.777	0.3678096	1.672431	0.1320667E-04	2.102555
12282011	23	0.004	0.017	0.013	0.001	0.003	0.001	0.003	0.007	0.012	0.009	0.013	274.637	0.797	0.3819262	1.949484	0.1703905E-04	2.058474
12282011	24	0.003	0.017	0.015	0.001	0.003	0.001	0.003	0.007	0.013	0.010	0.013	273.935	0.820	0.3780034	2.293207	0.2439357E-04	1.973168
12292011	01	0.001	0.017	0.022	0.000	0.003	0.001	0.003	0.006	0.015	0.010	0.013	273.305	0.840	NaN	2.854930	0.2113278E-01	-0.8693612
12292011	02	0.001	0.018	0.029	0.000	0.003	0.001	0.003	0.006	0.016	0.009	0.014	272.666	0.864	NaN	3.369333	0.2814288E-01	-0.9218247
12292011	03	0.000	0.016	0.029	0.000	0.003	0.001	0.003	0.006	0.016	0.010	0.014	272.306	0.872	NaN	3.465037	0.3017785E-01	-0.9399805
12292011	04	0.000	0.015	0.031	0.000	0.003	0.001	0.003	0.006	0.017	0.010	0.014	272.025	0.876	NaN	3.957932	0.3097737E-01	-0.8935763
12292011	05	0.000	0.014	0.034	0.000	0.003	0.001	0.003	0.006	0.018	0.010	0.015	271.767	0.879	NaN	4.039267	0.3508347E-01	-0.9388000
12292011	06	0.000	0.015	0.039	0.000	0.003	0.001	0.003	0.006	0.019	0.011	0.015	271.481	0.882	NaN	4.233480	0.4019997E-01	-0.9775283
12292011	07	0.000	0.019	0.051	0.000	0.003	0.001	0.003	0.007	0.021	0.014	0.016	271.206	0.885	NaN	5.075108	0.5327480E-01	-1.021077
12292011	08	0.000	0.023	0.057	0.000	0.004	0.002	0.003	0.008	0.023	0.018	0.016	271.593	0.856	NaN	4.840565	0.5644690E-01	-1.066744
12292011	09	0.001	0.025	0.052	0.001	0.004	0.002	0.004	0.009	0.025	0.023	0.017	273.405	0.783	0.2803396	3.218029	0.7281268E-04	1.645383
12292011	10	0.004	0.029	0.053	0.000	0.004	0.002	0.004	0.010	0.023	0.023	0.018	276.853	0.663	NaN	2.026984	0.5293490E-01	-1.416892
12292011	11	0.005	0.048	0.087	0.000	0.004	0.002	0.004	0.009	0.019	0.010	0.020	280.490	0.555	NaN	1.361678	0.8299719E-01	-1.784989
12292011	12	0.001	0.083	0.085	0.000	0.004	0.002	0.004	0.009	0.020	0.004	0.023	283.083	0.483	0.1497358E-01	1.553151	0.2132775E-02	-0.1377313
12292011	13	0.000	0.117	0.068	0.000	0.004	0.001	0.004	0.008	0.018	0.004	0.023	285.016	0.418	0.1573145E-02	0.7429255	0.2343501E-02	-0.4989199
12292011	14	0.000	0.121	0.058	0.000	0.003	0.001	0.003	0.007	0.017	0.003	0.022	285.957	0.388	0.2750158E-03	0.5916622	0.5057941E-02	-0.9319000
12292011	15	0.000	0.132	0.054	0.000	0.003	0.001	0.003	0.007	0.018	0.003	0.023	285.453	0.393	0.2477765E-03	0.6087903	0.6049831E-02	-0.9972755
12292011	16	0.000	0.136	0.050	0.000	0.003	0.001	0.003	0.007	0.019	0.002	0.024	284.346	0.411	0.2892613E-03	0.6895163	0.7015791E-02	-1.007532
12292011	17	0.000	0.133	0.043	0.000	0.003	0.001	0.003	0.007	0.020	0.002	0.024	282.740	0.438	0.5746484E-03	0.7764167	0.6006301E-02	-0.8885123
12292011	18	0.001	0.126	0.030	0.000	0.003	0.001	0.003	0.008	0.022	0.001	0.024	280.904	0.484	0.8598268E-02	0.9844701	0.1654485E-02	-0.2254602
12292011	19	0.001	0.114	0.020	0.000	0.003	0.002	0.004	0.010	0.026	0.001	0.025	279.422	0.531	0.5521911E-01	2.259263	0.1947032E-02	0.6459371E-01
12292011	20	0.010	0.102	0.012	0.001	0.003	0.002	0.005	0.011	0.020	0.005	0.025	278.520	0.549	0.2507566	1.228136	0.2803158E-04	1.641599
12292011	21	0.012	0.091	0.010	0.001	0.004	0.002	0.006	0.013	0.016	0.007	0.025	277.457	0.616	0.4004408	1.450760	0.1272955E-04	2.056782
12292011	22	0.011	0.081	0.009	0.001	0.004	0.003	0.006	0.015	0.014	0.009	0.025	276.742	0.665	0.5271304	1.714544	0.6279163E-05	2.436247
12292011	23	0.010	0.072	0.010	0.001	0.004	0.003	0.007	0.016	0.012	0.012	0.025	276.249	0.694	0.5360122	1.835502	0.5553870E-05	2.519159
12292011	24	0.007	0.065	0.013	0.001	0.004	0.003	0.008	0.018	0.012	0.013	0.025	275.737	0.732	0.4761457	1.775038	0.6406610E-05	2.442580
12302011	01	0.005	0.061	0.015	0.001	0.004	0.003	0.008	0.018	0.014	0.015	0.024	275.243	0.771	0.4649174	2.058141	0.9092968E-05	2.354769
12302011	02	0.003	0.059	0.017	0.001	0.004	0.003	0.007	0.017	0.016	0.018	0.025	274.967	0.793	0.4537698	2.932442	0.1950056E-04	2.177182
12302011	03	0.003	0.057	0.017	0.001	0.004	0.003	0.007	0.017	0.019	0.020	0.025	274.853	0.809	0.5077196	3.575477	0.2287612E-04	2.193952
12302011	04	0.003	0.057	0.016	0.001	0.004	0.003	0.008	0.017	0.023	0.024	0.025	274.848	0.826	0.5658121	4.488980	0.2758592E-04	2.211460
12302011	05	0.004	0.056	0.014	0.001	0.004	0.003	0.008	0.017	0.026	0.027	0.026	274.919	0.832	0.6339689	5.153697	0.2686175E-04	2.282984
12302011	06	0.005	0.056	0.012	0.002	0.004	0.003	0.009	0.019	0.031	0.031	0.026	275.080	0.842	0.6991966	5.653089	0.2275180E-04	2.395270
12302011	07	0.008	0.055	0.010	0.002	0.005	0.004	0.010	0.024	0.033	0.033	0.028	275.288	0.852	0.7547803	5.766233	0.1701382E-04	2.530090
12302011	08	0.014	0.034	0.011	0.002	0.005	0.005	0.012	0.031	0.025	0.025	0.029	275.772	0.855	0.7450392	4.513395	0.1412771E-04	2.504432
12302011	09	0.014	0.017	0.007	0.002	0.005	0.006	0.014	0.035	0.016	0.021	0.030	277.219	0.856	0.7107513	3.531406	0.8171715E-05	2.635634
12302011	10	0.012	0.011	0.014	0.002	0.006	0.006	0.014	0.033	0.010	0.011	0.030	280.549	0.808	0.5551642E-01	0.1534119	0.4225840E-06	2.559946
12302011	11	0.007	0.016	0.026	0.001	0.005	0.004	0.010	0.024	0.017	0.008	0.031	284.434	0.710	0.1844478	1.158354	0.3610210E-05	2.506309
12302011	12	0.001	0.045	0.047	0.001	0.003	0.002	0.005	0.012	0.027	0.004	0.035	286.877	0.631	0.000000	2.055542	0.4480524E-02	-0.3384024
12302011	13	0.000	0.063	0.058	0.001	0.002	0.001	0.003	0.007	0.022	0.003	0.036	288.837	0.565	0.000000	2.114381	0.1741375E-02	0.8429086E-01
12302011	14	0.000	0.039	0.057	0.001	0.001	0.001	0.002	0.005	0.019	0.002	0.034	289.688	0.542	0.000000	2.350583	0.5807515E-02	-0.3928147
12302011	15	0.000	0.026	0.054	0.001	0.001	0.001	0.002	0.005	0.017	0.002	0.032	289.399	0.551	0.000000	2.293759	0.5827410E-02	-0.4049278
12302011	16	0.000	0.022	0.048	0.001	0.001	0.001	0.002	0.005	0.017	0.002	0.031	288.749	0.567	0.000000	2.284672	0.4970478E-02	-0.3375743
12302011	17	0.000	0.017	0.034	0.001	0.002	0.001	0.003	0.007	0.021	0.001	0.030	287.360	0.622	0.000000	1.950274	0.3027103E-02	-0.1909316
12302011	18	0.001	0.009	0.019	0.001	0.002	0.002	0.004	0.011	0.027	0.001	0.029	285.473	0.665	0.2545118E-03	2.429464	0.1512095E-02	0.2059314
12302011	19	0.007	0.005	0.011	0.001	0.002	0.003	0.005	0.015	0.026	0.002	0.029	284.359	0.703	0.1693484	1.912776	0.2725759E-04	1.846177
12302011	20	0.013	0.008	0.009	0.002	0.002	0.003	0.006	0.016	0.020	0.005	0.029	278.520	0.549	0.3568888	1.208292	0.1104988E-04	2.038814
12302011	21	0.015	0.011	0.009	0.002	0.002	0.003	0.006	0.017	0.016	0.008	0.029	277.457	0.616	0.4429631	1.526682	0.9387025E-05	2.211221
12302011	22	0.015	0.012	0.008	0.002	0.002	0.003	0.007	0.019	0.014	0.011	0.029	276.742	0.665	0.5435177	1.731760	0.5199861E-05	2.522496
12302011	23	0.014	0.013	0.008	0.002	0.002	0.004	0.008	0.021	0.013	0.013	0.029	276.249	0.694	0.6120132	1.774191	0.2744098E-05	2.810601
12302011	24	0.011	0.014	0.010	0.002	0.002	0.004	0.008	0.022	0.015	0.015	0.029	275.737	0.732	0.6023517	2.031138	0.3945138E-05	2.711677
