# Supplementary material for: Understanding nitrate formation in a world with less sulfate
Source: Copernicus journal article supplement (doi:10.5194/acp-18-12765-2018), 2018-09-05
Supplement: Supplementary file 2 [file acp-18-12765-2018-supplement.zip › DATA/RAW DATA FOR DIURNALS/data_extract_YRK_dec_mod2011.csv]

Date	Hour	NH3	SO2	HNO3	CL	NA	MG	K	CA	NH4	NO3	SO4	T	RH	e_NO3	Water	H+	pH
12022011	01	0.002	0.117	0.050	0.001	0.002	0.003	0.007	0.018	0.059	0.058	0.020	274.832	0.831	0.5448639	7.660186	0.9564400E-04	1.903582
12022011	02	0.002	0.128	0.049	0.001	0.002	0.003	0.006	0.017	0.059	0.058	0.021	274.292	0.828	0.5531392	8.104407	0.1059020E-03	1.883817
12022011	03	0.001	0.139	0.049	0.001	0.002	0.003	0.006	0.017	0.062	0.061	0.022	273.674	0.839	0.5601487	9.319661	0.1471041E-03	1.801775
12022011	04	0.001	0.137	0.047	0.001	0.002	0.003	0.006	0.017	0.065	0.064	0.022	273.128	0.851	0.5840023	10.57594	0.1864115E-03	1.753846
12022011	05	0.001	0.125	0.040	0.001	0.002	0.003	0.007	0.018	0.067	0.067	0.021	272.648	0.860	0.6240036	11.33041	0.2004322E-03	1.752278
12022011	06	0.001	0.115	0.035	0.001	0.002	0.003	0.007	0.018	0.069	0.068	0.020	272.248	0.864	0.6660305	11.42364	0.1844668E-03	1.791886
12022011	07	0.001	0.110	0.031	0.001	0.002	0.004	0.008	0.020	0.071	0.071	0.020	271.939	0.863	0.6909227	11.30189	0.1826179E-03	1.791608
12022011	08	0.002	0.106	0.027	0.001	0.002	0.004	0.008	0.023	0.074	0.074	0.019	272.434	0.826	0.7286613	9.165894	0.8806129E-04	2.017390
12022011	09	0.001	0.102	0.007	0.002	0.002	0.005	0.009	0.026	0.077	0.117	0.019	274.441	0.748	NaN	9.472980	0.1300848E-01	-0.1377399
12022011	10	0.000	0.100	0.000	0.003	0.002	0.005	0.010	0.027	0.074	0.175	0.019	277.855	0.648	NaN	6.349373	0.6600050E-01	-1.016816
12022011	11	0.032	0.119	0.152	0.000	0.002	0.004	0.007	0.020	0.018	0.030	0.020	281.612	0.551	NaN	1.400168	0.1320000	-1.974394
12022011	12	0.020	0.137	0.144	0.000	0.002	0.002	0.005	0.013	0.014	0.004	0.023	284.323	0.485	NaN	1.181919	0.1229998	-2.017317
12022011	13	0.008	0.141	0.128	0.000	0.001	0.002	0.004	0.010	0.022	0.002	0.023	286.555	0.426	NaN	0.9072269	0.1169983	-2.110464
12022011	14	0.002	0.136	0.120	0.000	0.001	0.001	0.003	0.008	0.028	0.001	0.023	287.365	0.416	0.9855509E-02	1.376685	0.2623154E-02	-0.2799894
12022011	15	0.003	0.122	0.113	0.000	0.001	0.001	0.003	0.007	0.029	0.001	0.022	286.882	0.434	0.1236451E-01	1.628716	0.2861216E-02	-0.2447052
12022011	16	0.009	0.110	0.101	0.000	0.001	0.001	0.003	0.007	0.023	0.002	0.021	285.479	0.481	NaN	1.054627	0.9299993E-01	-1.945384
12022011	17	0.008	0.101	0.087	0.000	0.001	0.001	0.003	0.007	0.024	0.004	0.020	283.745	0.538	NaN	1.270434	0.7899644E-01	-1.793655
12022011	18	0.011	0.094	0.065	0.000	0.001	0.002	0.004	0.010	0.023	0.010	0.020	281.888	0.602	NaN	1.735584	0.5191257E-01	-1.475827
12022011	19	0.021	0.086	0.041	0.000	0.002	0.003	0.006	0.018	0.023	0.022	0.021	280.291	0.677	NaN	2.487028	0.1845640E-01	-0.8704662
12022011	20	0.018	0.083	0.034	0.001	0.002	0.004	0.009	0.024	0.032	0.031	0.021	279.120	0.731	0.5226196	2.253736	0.4377327E-05	2.711694
12022011	21	0.015	0.082	0.025	0.002	0.002	0.005	0.010	0.028	0.036	0.047	0.022	278.214	0.760	0.5767118	3.327514	0.9282152E-05	2.554471
12022011	22	0.005	0.082	0.000	0.004	0.002	0.005	0.011	0.031	0.050	0.087	0.022	277.470	0.777	NaN	9.399401	0.3836189E-04	2.389200
12022011	23	0.000	0.081	0.000	0.005	0.002	0.005	0.012	0.032	0.062	0.106	0.022	276.808	0.791	NaN	11.43694	0.5042705E-02	0.3556462
12022011	24	0.000	0.079	0.000	0.005	0.002	0.005	0.011	0.032	0.064	0.124	0.022	276.157	0.810	NaN	12.95290	0.2200879E-01	-0.2302293
12032011	01	0.000	0.075	0.027	0.004	0.002	0.005	0.011	0.030	0.059	0.114	0.022	275.536	0.837	NaN	14.27715	0.4700335E-01	-0.5174873
12032011	02	0.005	0.076	0.089	0.000	0.002	0.004	0.009	0.024	0.034	0.034	0.022	275.060	0.845	NaN	5.685097	0.8400023E-01	-1.169543
12032011	03	0.008	0.074	0.083	0.000	0.002	0.004	0.008	0.020	0.017	0.017	0.021	274.730	0.838	NaN	3.535033	0.7498218E-01	-1.326565
12032011	04	0.006	0.068	0.059	0.000	0.002	0.004	0.008	0.021	0.016	0.016	0.021	274.087	0.858	NaN	3.508742	0.5300019E-01	-1.179126
12032011	05	0.002	0.064	0.044	0.000	0.002	0.003	0.008	0.021	0.023	0.023	0.020	273.593	0.870	NaN	4.385872	0.4200053E-01	-0.9811988
12032011	06	0.001	0.060	0.040	0.000	0.002	0.003	0.007	0.020	0.027	0.027	0.020	273.270	0.869	NaN	4.912146	0.3900077E-01	-0.8998020
12032011	07	0.001	0.063	0.049	0.001	0.002	0.003	0.007	0.021	0.033	0.033	0.019	273.052	0.862	0.4005539	5.257432	0.1165829E-03	1.654139
12032011	08	0.001	0.071	0.061	0.001	0.002	0.004	0.008	0.021	0.040	0.040	0.019	273.334	0.828	0.3937899	4.930122	0.9520468E-04	1.714199
12032011	09	0.003	0.075	0.065	0.001	0.002	0.004	0.008	0.023	0.050	0.051	0.019	275.347	0.715	0.4163492	3.025701	0.1099491E-04	2.439634
12032011	10	0.026	0.091	0.131	0.000	0.002	0.004	0.008	0.024	0.025	0.027	0.020	279.364	0.571	NaN	1.569231	0.1070000	-1.833697
12032011	11	0.039	0.116	0.163	0.001	0.002	0.004	0.008	0.024	0.011	0.011	0.021	282.990	0.456	0.1619708	0.4967238	0.1783080E-06	3.444944
12032011	12	0.032	0.164	0.145	0.001	0.002	0.003	0.007	0.018	0.014	0.014	0.024	285.823	0.364	0.5565822E-01	0.3134489	0.7580987E-06	2.616441
12032011	13	0.021	0.188	0.098	0.001	0.002	0.002	0.006	0.013	0.018	0.005	0.027	288.091	0.297	0.2070153E-01	0.5135533	0.4040306E-04	1.104171
12032011	14	0.021	0.170	0.079	0.001	0.002	0.002	0.005	0.013	0.019	0.005	0.026	289.155	0.276	0.1549882E-01	0.4590723	0.3992419E-04	1.060645
12032011	15	0.022	0.138	0.061	0.001	0.002	0.002	0.005	0.012	0.015	0.004	0.023	288.639	0.294	0.1775813E-01	0.4104386	0.2437527E-04	1.226299
12032011	16	0.021	0.105	0.044	0.001	0.002	0.002	0.004	0.010	0.012	0.003	0.019	287.319	0.336	0.2663720E-01	0.4173597	0.1489647E-04	1.447427
12032011	17	0.022	0.090	0.032	0.001	0.002	0.002	0.004	0.009	0.009	0.002	0.017	285.424	0.399	0.5070311E-01	0.4554348	0.8443050E-05	1.731927
12032011	18	0.027	0.082	0.019	0.001	0.002	0.002	0.005	0.010	0.006	0.004	0.016	283.469	0.454	0.1291845	0.4187020	0.1268053E-05	2.518768
12032011	19	0.032	0.073	0.015	0.002	0.002	0.002	0.005	0.012	0.004	0.004	0.016	281.723	0.533	0.1709428	0.3233659	0.5997064E-06	2.731755
12032011	20	0.031	0.065	0.016	0.002	0.002	0.003	0.006	0.015	0.003	0.003	0.016	280.886	0.572	0.4297918E-01	0.6236235E-01	0.5285162E-07	3.071864
12032011	21	0.026	0.058	0.017	0.002	0.002	0.003	0.007	0.017	0.006	0.006	0.016	280.531	0.591	0.6151199E-04	0.4860489E-04	0.2365243E-10	3.312804
12032011	22	0.023	0.060	0.024	0.003	0.003	0.003	0.007	0.016	0.008	0.008	0.017	280.267	0.621	0.9576029E-01	0.1758710	0.1581236E-06	3.046198
12032011	23	0.019	0.068	0.023	0.005	0.003	0.003	0.008	0.016	0.009	0.010	0.019	280.226	0.638	0.1762345	0.4514274	0.5069450E-06	2.949627
12032011	24	0.012	0.072	0.022	0.006	0.003	0.003	0.008	0.016	0.013	0.014	0.023	279.826	0.660	0.3110272	1.318971	0.3403934E-05	2.588254
12042011	01	0.010	0.077	0.019	0.006	0.003	0.003	0.008	0.016	0.014	0.015	0.024	279.590	0.669	0.3404860	1.579855	0.4267692E-05	2.568424
12042011	02	0.002	0.077	0.022	0.006	0.003	0.003	0.008	0.016	0.021	0.008	0.025	279.467	0.680	0.3501844	1.736134	0.5456312E-05	2.502684
12042011	03	0.002	0.071	0.021	0.006	0.003	0.003	0.008	0.016	0.022	0.007	0.024	279.461	0.696	0.3875637	1.757806	0.4220014E-05	2.619657
12042011	04	0.007	0.068	0.016	0.007	0.003	0.003	0.008	0.015	0.016	0.012	0.023	279.804	0.695	0.3596405	1.722284	0.4288484E-05	2.603801
12042011	05	0.010	0.067	0.015	0.007	0.003	0.002	0.007	0.014	0.012	0.013	0.021	280.278	0.692	0.3069009	1.422734	0.3682611E-05	2.586968
12042011	06	0.010	0.067	0.015	0.006	0.003	0.002	0.007	0.013	0.011	0.012	0.020	280.238	0.715	0.3215479	1.600269	0.4373940E-05	2.563320
12042011	07	0.010	0.067	0.015	0.005	0.003	0.002	0.007	0.013	0.012	0.012	0.019	280.015	0.742	0.3345951	1.548572	0.4077009E-05	2.579590
12042011	08	0.011	0.068	0.015	0.005	0.003	0.002	0.008	0.013	0.011	0.012	0.019	280.202	0.754	0.3311206	1.571796	0.4111173E-05	2.582430
12042011	09	0.013	0.069	0.018	0.004	0.003	0.003	0.008	0.014	0.011	0.011	0.019	281.644	0.753	0.2623356	1.253364	0.2827348E-05	2.646698
12042011	10	0.018	0.069	0.022	0.004	0.003	0.003	0.008	0.014	0.010	0.011	0.019	284.773	0.668	0.1270851	0.6567736	0.1433099E-05	2.661140
12042011	11	0.018	0.070	0.028	0.004	0.003	0.002	0.006	0.011	0.010	0.009	0.018	286.745	0.647	0.1167831	0.9831817	0.3286468E-05	2.475904
12042011	12	0.012	0.074	0.025	0.004	0.002	0.001	0.004	0.007	0.010	0.004	0.015	288.200	0.631	0.2657360E-01	0.8052431	0.2769582E-04	1.463513
12042011	13	0.011	0.071	0.027	0.003	0.002	0.001	0.003	0.006	0.010	0.003	0.015	289.296	0.618	0.1453334E-01	0.8740619	0.6720675E-04	1.114129
12042011	14	0.011	0.062	0.028	0.003	0.002	0.001	0.003	0.006	0.009	0.002	0.014	289.623	0.619	0.1392144E-01	0.7834962	0.4893204E-04	1.204444
12042011	15	0.009	0.053	0.027	0.002	0.002	0.001	0.003	0.006	0.010	0.001	0.014	289.138	0.632	0.1479447E-01	0.8072250	0.5137827E-04	1.196215
12042011	16	0.002	0.044	0.023	0.001	0.002	0.001	0.003	0.006	0.017	0.001	0.016	287.887	0.655	0.1807213E-03	2.306960	0.1820919E-02	0.1027493
12042011	17	0.008	0.041	0.016	0.001	0.002	0.001	0.003	0.007	0.014	0.001	0.016	286.645	0.695	0.4101712E-01	1.141333	0.4527118E-04	1.401591
12042011	18	0.013	0.036	0.011	0.001	0.002	0.002	0.003	0.009	0.005	0.001	0.015	285.279	0.726	0.1042228	0.9789459	0.6365225E-05	2.186945
12042011	19	0.012	0.031	0.012	0.002	0.003	0.002	0.004	0.011	0.002	0.002	0.014	284.030	0.774	0.1113530	0.5821032	0.1804247E-05	2.508704
12042011	20	0.012	0.027	0.015	0.003	0.003	0.003	0.005	0.013	0.002	0.002	0.013	283.638	0.788	0.000000	0.1786738E-08	0.8808172E-19	7.307175
12042011	21	0.010	0.024	0.015	0.004	0.003	0.003	0.005	0.014	0.002	0.005	0.013	283.777	0.800	0.000000	0.1439181E-08	0.7192605E-19	7.301229
12042011	22	0.008	0.022	0.016	0.005	0.003	0.003	0.005	0.014	0.003	0.004	0.014	283.941	0.819	0.000000	0.1190814E-08	0.6065255E-19	7.292995
12042011	23	0.006	0.013	0.013	0.006	0.003	0.002	0.005	0.012	0.005	0.004	0.015	283.997	0.832	0.1054932	0.8431988	0.2475053E-05	2.532346
12042011	24	0.005	0.011	0.011	0.006	0.003	0.002	0.005	0.011	0.008	0.005	0.017	283.855	0.847	0.5275011E-04	7.197678	0.1760755E-02	0.6114934
12052011	01	0.003	0.009	0.009	0.005	0.003	0.002	0.005	0.011	0.011	0.004	0.017	283.525	0.867	0.3014988	2.463375	0.6768572E-05	2.561033
12052011	02	0.002	0.008	0.008	0.005	0.003	0.002	0.005	0.010	0.013	0.003	0.017	283.418	0.877	0.2988828	2.805625	0.1011680E-04	2.442987
12052011	03	0.002	0.007	0.007	0.005	0.004	0.002	0.004	0.009	0.013	0.002	0.017	283.711	0.880	0.000000	8.281303	0.1690813E-02	0.6900032
12052011	04	0.002	0.008	0.006	0.005	0.004	0.001	0.004	0.007	0.015	0.002	0.016	283.996	0.888	0.1953242	3.151790	0.3114372E-04	2.005187
12052011	05	0.002	0.009	0.006	0.005	0.004	0.001	0.003	0.006	0.015	0.002	0.016	284.027	0.905	0.000000	7.966068	0.1484296E-02	0.7297236
12052011	06	0.004	0.009	0.006	0.004	0.004	0.001	0.003	0.006	0.013	0.002	0.015	284.046	0.920	0.2233974	4.353569	0.4245175E-04	2.010950
12052011	07	0.006	0.008	0.006	0.004	0.004	0.001	0.003	0.006	0.011	0.003	0.015	284.059	0.930	0.2461078	5.166417	0.4749712E-04	2.036522
12052011	08	0.007	0.007	0.007	0.005	0.004	0.002	0.003	0.006	0.011	0.005	0.015	284.304	0.926	0.3149647	5.897959	0.3798275E-04	2.191115
12052011	09	0.008	0.008	0.008	0.005	0.004	0.002	0.003	0.006	0.011	0.005	0.015	285.649	0.894	0.1940349	3.380984	0.2627150E-04	2.109558
12052011	10	0.008	0.013	0.010	0.005	0.004	0.001	0.003	0.005	0.008	0.003	0.013	288.119	0.840	0.5544525E-01	1.842316	0.3606439E-04	1.708285
12052011	11	0.006	0.022	0.012	0.004	0.004	0.001	0.002	0.004	0.007	0.002	0.011	290.181	0.766	0.1738089E-01	1.163522	0.5032674E-04	1.363976
12052011	12	0.002	0.031	0.015	0.003	0.003	0.001	0.002	0.003	0.008	0.001	0.009	291.280	0.730	0.7742703E-02	0.8630648	0.5565806E-04	1.190515
12052011	13	0.001	0.026	0.017	0.002	0.003	0.001	0.001	0.002	0.009	0.001	0.011	292.306	0.696	0.000000	1.092654	0.1680528E-02	-0.1869629
12052011	14	0.000	0.021	0.015	0.002	0.002	0.001	0.001	0.002	0.011	0.000	0.013	292.740	0.676	0.000000	1.191001	0.2296725E-02	-0.2851968
12052011	15	0.001	0.018	0.011	0.002	0.002	0.001	0.001	0.002	0.011	0.000	0.013	292.303	0.686	0.000000	1.213317	0.2527577E-02	-0.3187300
12052011	16	0.002	0.016	0.009	0.002	0.003	0.001	0.001	0.003	0.012	0.000	0.012	291.740	0.710	0.8976460E-04	1.669549	0.1679766E-02	-0.2649562E-02
12052011	17	0.010	0.014	0.007	0.001	0.003	0.001	0.002	0.005	0.007	0.000	0.012	290.728	0.754	0.1744616E-01	1.061291	0.4217976E-04	1.400730
12052011	18	0.014	0.011	0.005	0.002	0.003	0.002	0.003	0.007	0.001	0.001	0.011	289.245	0.796	0.1199486	0.8363505	0.1692366E-05	2.693894
12052011	19	0.015	0.007	0.004	0.003	0.003	0.002	0.004	0.011	0.001	0.003	0.010	287.889	0.866	0.4285715	0.6870300	0.7197066E-06	2.979820
12052011	20	0.015	0.008	0.000	0.008	0.003	0.003	0.005	0.013	0.001	0.012	0.009	288.226	0.870	NaN	4.642595	0.2930347E-09	7.199841
12052011	21	0.011	0.019	0.003	0.008	0.004	0.002	0.005	0.011	0.002	0.009	0.009	288.334	0.885	NaN	5.284849	0.1437078E-04	2.565552
12052011	22	0.011	0.020	0.004	0.004	0.004	0.002	0.005	0.010	0.001	0.005	0.010	288.353	0.900	0.4444445	1.258930	0.2226588E-05	2.752362
12052011	23	0.011	0.020	0.003	0.004	0.004	0.002	0.005	0.009	0.001	0.004	0.010	288.364	0.917	0.5714286	2.134331	0.2342264E-05	2.959626
12052011	24	0.012	0.022	0.004	0.003	0.004	0.002	0.004	0.009	0.001	0.001	0.010	288.257	0.935	0.9590256E-01	0.8608056	0.1319790E-05	2.814400
12062011	01	0.012	0.020	0.002	0.004	0.004	0.002	0.004	0.007	0.002	0.002	0.010	287.581	0.964	0.3943822	4.584640	0.7423013E-05	2.790725
12062011	02	0.011	0.015	0.002	0.004	0.004	0.001	0.004	0.006	0.002	0.002	0.010	287.307	0.970	0.5499110	8.659666	0.1481661E-04	2.766752
12062011	03	0.011	0.011	0.001	0.003	0.004	0.001	0.003	0.005	0.004	0.001	0.010	287.193	0.969	0.6101536	8.098207	0.1057632E-04	2.884054
12062011	04	0.012	0.007	0.001	0.003	0.004	0.001	0.003	0.004	0.005	0.001	0.010	287.139	0.968	0.5811554	9.068615	0.1537345E-04	2.770770
12062011	05	0.014	0.004	0.001	0.003	0.004	0.001	0.003	0.004	0.005	0.001	0.010	287.115	0.967	0.6188045	9.272586	0.1374207E-04	2.829149
12062011	06	0.015	0.003	0.001	0.003	0.004	0.001	0.003	0.004	0.004	0.001	0.009	287.243	0.967	0.6703817	8.427525	0.8733263E-05	2.984524
12062011	07	0.016	0.003	0.001	0.003	0.004	0.001	0.003	0.003	0.003	0.001	0.008	287.980	0.947	0.4561786	4.278426	0.5453692E-05	2.894593
12062011	08	0.016	0.003	0.002	0.003	0.004	0.001	0.002	0.003	0.003	0.001	0.007	288.750	0.943	0.3762690	2.993374	0.3510297E-05	2.930817
12062011	09	0.015	0.003	0.002	0.002	0.004	0.001	0.002	0.002	0.003	0.001	0.007	288.774	0.947	0.3270754	3.943937	0.7930105E-05	2.696651
12062011	10	0.016	0.004	0.003	0.003	0.004	0.001	0.002	0.002	0.005	0.002	0.007	288.829	0.944	0.2944875	3.575244	0.7801602E-05	2.661122
12062011	11	0.015	0.004	0.005	0.002	0.003	0.001	0.002	0.002	0.007	0.002	0.008	289.208	0.933	0.1747692	3.257916	0.1445215E-04	2.353007
12062011	12	0.006	0.006	0.006	0.002	0.002	0.000	0.002	0.001	0.011	0.001	0.009	289.743	0.901	0.3237993E-01	2.614320	0.9518953E-04	1.438770
12062011	13	0.001	0.008	0.009	0.001	0.001	0.000	0.001	0.001	0.012	0.000	0.011	289.349	0.906	0.000000	3.505948	0.2136742E-02	0.2150533
12062011	14	0.000	0.007	0.011	0.001	0.001	0.000	0.001	0.000	0.013	0.000	0.012	289.057	0.902	0.000000	3.914691	0.3068244E-02	0.1058076
12062011	15	0.000	0.006	0.012	0.001	0.001	0.000	0.001	0.000	0.014	0.000	0.012	288.702	0.896	0.000000	3.870794	0.2879571E-02	0.1284724
12062011	16	0.001	0.005	0.013	0.000	0.001	0.000	0.001	0.000	0.015	0.000	0.013	288.324	0.892	0.3625214E-02	3.805305	0.3059928E-02	0.9467836E-01
12062011	17	0.001	0.004	0.011	0.000	0.001	0.000	0.001	0.001	0.017	0.000	0.013	287.915	0.891	0.8265436E-02	3.480267	0.2262112E-02	0.1870986
12062011	18	0.003	0.003	0.008	0.002	0.001	0.000	0.001	0.001	0.024	0.001	0.013	287.366	0.908	0.6476945E-01	4.411843	0.1792520E-03	1.391156
12062011	19	0.009	0.004	0.009	0.012	0.001	0.000	0.002	0.002	0.038	0.002	0.016	286.537	0.900	0.2841608	5.865806	0.4932756E-04	2.075238
12062011	20	0.007	0.004	0.009	0.020	0.001	0.001	0.003	0.003	0.043	0.002	0.015	286.034	0.892	0.3816205	5.751117	0.2351689E-04	2.388372
12062011	21	0.006	0.004	0.009	0.025	0.001	0.001	0.003	0.003	0.050	0.003	0.018	286.036	0.925	0.5356529	13.65446	0.5535581E-04	2.392112
12062011	22	0.011	0.003	0.005	0.014	0.001	0.001	0.003	0.003	0.036	0.004	0.016	286.151	0.933	0.4819031	9.704964	0.3768034E-04	2.410879
12062011	23	0.005	0.002	0.002	0.000	0.000	0.000	0.000	0.000	0.004	0.000	0.003	285.842	0.943	0.2530771E-01	1.639344	0.5881520E-04	1.445181
12062011	24	0.003	0.003	0.001	0.000	0.000	0.000	0.000	0.000	0.003	0.000	0.002	285.530	0.939	0.1266295E-01	1.092896	0.5541535E-04	1.294949
12072011	01	0.005	0.003	0.002	0.000	0.000	0.000	0.000	0.000	0.005	0.000	0.003	285.158	0.941	0.3794354E-01	1.639344	0.4235721E-04	1.587743
12072011	02	0.005	0.003	0.003	0.000	0.000	0.000	0.001	0.000	0.007	0.000	0.004	284.778	0.939	NaN	3.406384	0.9975063E-04	1.533378
12072011	03	0.005	0.003	0.003	0.000	0.000	0.000	0.001	0.000	0.007	0.000	0.004	284.336	0.938	NaN	3.412046	0.9587883E-04	1.551292
12072011	04	0.004	0.002	0.003	0.000	0.000	0.000	0.001	0.000	0.007	0.000	0.004	283.817	0.939	NaN	3.355091	0.1488757E-03	1.352881
12072011	05	0.004	0.002	0.004	0.000	0.000	0.000	0.001	0.000	0.006	0.000	0.004	283.290	0.939	NaN	3.371732	0.6198065E-03	0.7355970
12072011	06	0.004	0.002	0.004	0.000	0.000	0.000	0.001	0.000	0.005	0.000	0.003	282.771	0.932	NaN	2.675091	0.2638548E-03	1.005973
12072011	07	0.005	0.002	0.005	0.000	0.001	0.000	0.001	0.000	0.003	0.000	0.002	282.227	0.923	NaN	2.351354	0.9028940E-04	1.415681
12072011	08	0.005	0.003	0.006	0.000	0.001	0.000	0.001	0.000	0.002	0.000	0.002	281.658	0.914	NaN	2.067040	0.6805820E-03	0.4824684
12072011	09	0.004	0.003	0.007	0.000	0.000	0.000	0.000	0.000	0.001	0.000	0.001	281.026	0.912	0.1555544E-01	0.3855298	0.1443253E-04	1.426715
12072011	10	0.004	0.005	0.007	0.000	0.000	0.000	0.000	0.000	0.001	0.000	0.001	280.947	0.888	0.1230294E-01	0.3118262	0.1520241E-04	1.312000
12072011	11	0.004	0.010	0.010	0.000	0.000	0.000	0.000	0.000	0.001	0.000	0.001	280.212	0.881	0.1360500E-01	0.2968023	0.1451810E-04	1.310557
12072011	12	0.004	0.009	0.008	0.000	0.000	0.000	0.000	0.000	0.002	0.000	0.001	279.697	0.873	0.1916575E-01	0.2794686	0.1043466E-04	1.427855
12072011	13	0.003	0.009	0.006	0.000	0.001	0.000	0.000	0.000	0.002	0.000	0.002	279.128	0.870	0.2526569E-01	0.5400757	0.3228305E-04	1.223480
12072011	14	0.003	0.010	0.004	0.000	0.001	0.000	0.000	0.000	0.002	0.000	0.002	278.645	0.856	0.2646333E-01	0.4986227	0.3078512E-04	1.209431
12072011	15	0.002	0.018	0.003	0.000	0.001	0.000	0.000	0.000	0.002	0.000	0.002	278.396	0.829	0.1228470E-01	0.4127000	0.5914126E-04	0.8437439
12072011	16	0.002	0.033	0.003	0.000	0.001	0.000	0.000	0.000	0.002	0.000	0.002	278.083	0.813	0.1186496E-01	0.3748262	0.5897132E-04	0.8031892
12072011	17	0.003	0.038	0.005	0.001	0.001	0.000	0.000	0.000	0.004	0.000	0.003	277.777	0.797	0.3074169E-01	0.5394974	0.5131239E-04	1.021767
12072011	18	0.002	0.033	0.007	0.001	0.001	0.000	0.001	0.001	0.010	0.001	0.007	277.494	0.789	0.5302721E-01	1.016171	0.1047574E-03	0.9867820
12072011	19	0.000	0.025	0.012	0.001	0.002	0.000	0.001	0.001	0.018	0.000	0.013	276.922	0.791	0.000000	1.910969	0.2482611E-02	-0.1136551
12072011	20	0.000	0.020	0.016	0.001	0.002	0.000	0.001	0.002	0.021	0.000	0.017	277.024	0.765	0.000000	2.122175	0.5129587E-02	-0.3833013
12072011	21	0.000	0.019	0.022	0.001	0.002	0.000	0.001	0.002	0.022	0.000	0.018	276.891	0.748	0.000000	2.055174	0.6238027E-02	-0.4821987
12072011	22	0.000	0.018	0.027	0.001	0.002	0.000	0.001	0.002	0.022	0.001	0.018	276.734	0.731	0.000000	1.893877	0.6403666E-02	-0.5290770
12072011	23	0.000	0.019	0.032	0.001	0.002	0.000	0.001	0.002	0.021	0.001	0.019	276.551	0.716	0.000000	1.969543	0.9365321E-02	-0.6771572
12072011	24	0.000	0.021	0.038	0.000	0.002	0.000	0.002	0.002	0.022	0.001	0.020	276.264	0.707	0.2475023E-02	1.989482	0.9464396E-02	-0.6773529
12082011	01	0.000	0.022	0.043	0.001	0.001	0.000	0.002	0.003	0.023	0.002	0.020	275.971	0.695	0.000000	1.747735	0.7532940E-02	-0.6344889
12082011	02	0.000	0.022	0.046	0.001	0.002	0.000	0.002	0.003	0.024	0.002	0.020	275.682	0.689	0.000000	1.744262	0.5620710E-02	-0.5081794
12082011	03	0.000	0.022	0.047	0.001	0.002	0.000	0.002	0.003	0.025	0.003	0.019	275.193	0.696	0.000000	1.784724	0.2806977E-02	-0.1966679
12082011	04	0.000	0.021	0.047	0.001	0.002	0.000	0.002	0.003	0.025	0.003	0.018	274.601	0.711	0.000000	1.788610	0.1197069E-02	0.1743964
12082011	05	0.001	0.020	0.047	0.001	0.002	0.000	0.002	0.003	0.026	0.003	0.018	274.194	0.725	0.3997087E-03	2.209139	0.6994943E-03	0.4994389
12082011	06	0.001	0.020	0.047	0.001	0.002	0.000	0.002	0.003	0.027	0.003	0.018	273.815	0.739	0.5382895E-03	2.560605	0.7309941E-03	0.5444288
12082011	07	0.000	0.020	0.046	0.001	0.002	0.000	0.002	0.003	0.027	0.003	0.019	273.489	0.751	0.000000	2.211225	0.1161469E-02	0.2796255
12082011	08	0.000	0.018	0.043	0.001	0.001	0.000	0.002	0.002	0.026	0.002	0.019	273.580	0.744	0.000000	2.134728	0.4495092E-02	-0.3233959
12082011	09	0.000	0.017	0.039	0.000	0.001	0.000	0.001	0.002	0.026	0.002	0.019	274.860	0.694	0.5559683E-02	1.741382	0.5910457E-02	-0.5307270
12082011	10	0.000	0.021	0.038	0.000	0.001	0.000	0.001	0.002	0.025	0.001	0.019	276.778	0.624	0.2379239E-02	1.322216	0.6947582E-02	-0.7205313
12082011	11	0.000	0.025	0.036	0.000	0.001	0.000	0.001	0.002	0.024	0.001	0.018	278.939	0.548	0.1462221E-02	0.9898990	0.6030803E-02	-0.7847843
12082011	12	0.000	0.027	0.034	0.000	0.001	0.000	0.001	0.002	0.024	0.001	0.017	280.586	0.497	0.1656175E-02	0.8338503	0.4145356E-02	-0.6964738
12082011	13	0.000	0.029	0.032	0.000	0.001	0.000	0.001	0.002	0.021	0.001	0.015	281.906	0.457	0.1290262E-02	0.6481733	0.3219408E-02	-0.6960848
12082011	14	0.000	0.034	0.035	0.000	0.001	0.000	0.001	0.002	0.021	0.001	0.015	282.278	0.452	0.1175165E-02	0.6272456	0.3232843E-02	-0.7121469
12082011	15	0.001	0.039	0.038	0.000	0.001	0.000	0.001	0.002	0.022	0.000	0.015	281.829	0.471	0.5310535E-02	0.7323173	0.1681256E-02	-0.3609345
12082011	16	0.001	0.043	0.039	0.000	0.001	0.000	0.001	0.002	0.022	0.000	0.015	280.879	0.510	0.6617606E-02	0.8249457	0.1674955E-02	-0.3075779
12082011	17	0.001	0.047	0.038	0.000	0.001	0.000	0.001	0.003	0.022	0.001	0.014	279.563	0.560	NaN	0.9246342	0.3599285E-01	-1.590246
12082011	18	0.002	0.051	0.038	0.000	0.001	0.000	0.001	0.003	0.022	0.003	0.014	278.266	0.622	NaN	1.153337	0.3698469E-01	-1.506066
12082011	19	0.002	0.056	0.047	0.000	0.001	0.001	0.001	0.003	0.023	0.005	0.014	277.279	0.688	NaN	1.684660	0.4495468E-01	-1.426263
12082011	20	0.002	0.059	0.058	0.000	0.001	0.001	0.002	0.004	0.024	0.006	0.014	276.517	0.739	NaN	2.156909	0.5293191E-01	-1.389886
12082011	21	0.003	0.060	0.067	0.000	0.001	0.001	0.002	0.004	0.024	0.007	0.014	275.999	0.764	NaN	2.427449	0.6194113E-01	-1.406829
12082011	22	0.001	0.061	0.071	0.000	0.001	0.001	0.002	0.004	0.026	0.010	0.014	275.654	0.776	NaN	2.664916	0.6894416E-01	-1.412814
12082011	23	0.002	0.061	0.063	0.000	0.001	0.001	0.002	0.005	0.026	0.013	0.014	275.413	0.782	NaN	2.770392	0.6090507E-01	-1.342112
12082011	24	0.002	0.064	0.050	0.000	0.001	0.001	0.003	0.006	0.030	0.019	0.015	275.191	0.790	NaN	3.371323	0.4864506E-01	-1.159238
12092011	01	0.002	0.071	0.047	0.000	0.001	0.001	0.003	0.007	0.034	0.024	0.015	274.996	0.797	NaN	3.988651	0.4439113E-01	-1.046470
12092011	02	0.002	0.082	0.046	0.000	0.001	0.001	0.003	0.008	0.037	0.027	0.016	274.826	0.802	NaN	4.287144	0.4327551E-01	-1.004074
12092011	03	0.001	0.092	0.049	0.000	0.001	0.001	0.003	0.007	0.038	0.024	0.018	274.612	0.813	NaN	4.455872	0.4926710E-01	-1.043624
12092011	04	0.001	0.095	0.047	0.000	0.001	0.001	0.003	0.007	0.038	0.019	0.020	274.370	0.825	NaN	4.955656	0.4588598E-01	-0.9665789
12092011	05	0.001	0.096	0.046	0.000	0.001	0.001	0.003	0.006	0.037	0.014	0.021	274.101	0.837	NaN	5.051003	0.4475388E-01	-0.9474530
12092011	06	0.000	0.101	0.046	0.000	0.001	0.001	0.003	0.006	0.037	0.012	0.022	273.852	0.849	NaN	5.189925	0.4570010E-01	-0.9447560
12092011	07	0.001	0.105	0.043	0.000	0.001	0.001	0.003	0.006	0.037	0.012	0.022	273.666	0.858	NaN	5.733079	0.4121134E-01	-0.8566288
12092011	08	0.001	0.106	0.034	0.001	0.001	0.001	0.003	0.008	0.039	0.017	0.023	273.972	0.832	0.2982003	4.858335	0.2215874E-03	1.340942
12092011	09	0.003	0.103	0.024	0.001	0.001	0.002	0.004	0.010	0.043	0.024	0.024	275.571	0.758	0.4787141	3.908166	0.4930988E-04	1.899039
12092011	10	0.003	0.113	0.036	0.000	0.001	0.002	0.004	0.009	0.042	0.018	0.025	278.131	0.662	NaN	2.746883	0.3131009E-01	-1.056844
12092011	11	0.004	0.123	0.043	0.000	0.001	0.001	0.003	0.008	0.041	0.012	0.027	280.777	0.575	NaN	1.910043	0.4185132E-01	-1.340666
12092011	12	0.001	0.142	0.055	0.000	0.001	0.001	0.003	0.007	0.037	0.001	0.029	283.247	0.488	0.1758724E-01	1.383598	0.1930018E-02	-0.1445512
12092011	13	0.000	0.122	0.052	0.000	0.001	0.001	0.003	0.006	0.033	0.000	0.028	284.892	0.434	0.1197457E-02	1.005944	0.5173726E-02	-0.7112297
12092011	14	0.000	0.106	0.049	0.000	0.001	0.001	0.002	0.005	0.030	0.000	0.027	285.497	0.422	0.3420711E-03	0.8721511	0.9053818E-02	-1.016240
12092011	15	0.000	0.100	0.047	0.000	0.001	0.001	0.002	0.005	0.030	0.000	0.027	284.973	0.437	0.4096627E-03	0.9379683	0.9021577E-02	-0.9830943
12092011	16	0.000	0.085	0.042	0.000	0.001	0.001	0.002	0.005	0.027	0.000	0.025	284.054	0.465	0.5164146E-03	0.9571366	0.7973576E-02	-0.9206792
12092011	17	0.000	0.072	0.037	0.000	0.001	0.001	0.002	0.005	0.025	0.000	0.022	282.759	0.501	0.1636803E-02	0.9970627	0.4053146E-02	-0.6090698
12092011	18	0.000	0.065	0.034	0.000	0.001	0.001	0.002	0.005	0.025	0.000	0.022	281.683	0.543	0.2242029E-02	1.131762	0.3987013E-02	-0.5468926
12092011	19	0.004	0.057	0.025	0.000	0.001	0.001	0.003	0.007	0.025	0.002	0.021	280.888	0.589	0.4443729E-01	2.350977	0.2085782E-02	0.5197937E-01
12092011	20	0.010	0.053	0.019	0.000	0.001	0.002	0.004	0.009	0.021	0.005	0.021	280.277	0.622	NaN	1.781140	0.6994206E-02	-0.5940404
12092011	21	0.009	0.053	0.021	0.000	0.001	0.002	0.004	0.010	0.020	0.006	0.021	279.677	0.640	NaN	1.816070	0.9973674E-02	-0.7397225
12092011	22	0.008	0.055	0.024	0.000	0.002	0.002	0.004	0.010	0.021	0.009	0.020	278.867	0.658	NaN	2.009583	0.1299815E-01	-0.8107756
12092011	23	0.008	0.056	0.023	0.001	0.002	0.002	0.004	0.011	0.021	0.011	0.021	277.848	0.681	0.3273594	1.773763	0.1685567E-04	2.022150
12092011	24	0.007	0.056	0.021	0.001	0.003	0.002	0.004	0.011	0.022	0.014	0.021	277.039	0.701	0.3790383	2.049615	0.1781099E-04	2.060984
12102011	01	0.006	0.057	0.025	0.001	0.003	0.002	0.005	0.011	0.025	0.018	0.021	276.409	0.711	0.4069795	2.367377	0.1926956E-04	2.089396
12102011	02	0.005	0.057	0.027	0.001	0.003	0.002	0.004	0.010	0.029	0.020	0.020	275.899	0.719	0.4293967	2.645641	0.2301070E-04	2.060601
12102011	03	0.004	0.055	0.026	0.001	0.003	0.002	0.004	0.009	0.031	0.019	0.020	275.535	0.726	0.4378541	2.856178	0.2923751E-04	1.989845
12102011	04	0.004	0.047	0.023	0.001	0.003	0.001	0.004	0.007	0.032	0.017	0.020	275.355	0.725	0.3856586	2.766843	0.4861929E-04	1.755176
12102011	05	0.004	0.039	0.021	0.002	0.002	0.001	0.004	0.006	0.030	0.014	0.019	275.157	0.728	0.3580237	2.571753	0.5310318E-04	1.685109
12102011	06	0.004	0.039	0.018	0.002	0.002	0.001	0.003	0.006	0.028	0.012	0.017	274.923	0.731	0.4147465	2.328974	0.3243030E-04	1.856214
12102011	07	0.004	0.042	0.016	0.002	0.002	0.001	0.003	0.005	0.027	0.011	0.017	274.725	0.730	0.3773203	2.304052	0.4464993E-04	1.712672
12102011	08	0.005	0.044	0.012	0.003	0.002	0.001	0.003	0.006	0.027	0.012	0.017	274.853	0.719	0.4591298	2.172944	0.2489466E-04	1.940942
12102011	09	0.008	0.046	0.012	0.003	0.002	0.001	0.004	0.006	0.027	0.013	0.017	276.306	0.666	0.4522919	1.793491	0.1522414E-04	2.071167
12102011	10	0.008	0.052	0.021	0.003	0.002	0.001	0.004	0.007	0.031	0.015	0.019	278.570	0.598	0.3163831	1.465111	0.1732141E-04	1.927287
12102011	11	0.007	0.052	0.040	0.001	0.001	0.001	0.003	0.006	0.032	0.013	0.019	280.410	0.538	0.1656202	1.184278	0.3213585E-04	1.566464
12102011	12	0.007	0.049	0.049	0.001	0.001	0.001	0.003	0.006	0.029	0.010	0.019	281.773	0.503	0.9899491E-01	0.9720830	0.4345725E-04	1.349641
12102011	13	0.007	0.045	0.052	0.001	0.001	0.001	0.003	0.007	0.026	0.007	0.020	282.884	0.477	0.6145060E-01	0.8671870	0.6179656E-04	1.147148
12102011	14	0.007	0.046	0.049	0.000	0.001	0.001	0.003	0.007	0.025	0.005	0.020	283.119	0.473	NaN	0.9973814	0.4198069E-01	-1.624188
12102011	15	0.006	0.049	0.042	0.000	0.001	0.001	0.003	0.006	0.024	0.004	0.019	282.290	0.492	NaN	1.028327	0.3596789E-01	-1.543784
12102011	16	0.003	0.054	0.041	0.000	0.001	0.001	0.003	0.006	0.027	0.002	0.021	281.086	0.518	0.3019369E-01	1.850619	0.2131096E-02	-0.6128606E-01
12102011	17	0.001	0.059	0.040	0.000	0.001	0.001	0.003	0.007	0.031	0.001	0.023	279.457	0.552	0.3748351E-01	2.092119	0.2219567E-02	-0.2568181E-01
12102011	18	0.001	0.059	0.037	0.000	0.001	0.001	0.004	0.008	0.034	0.000	0.026	277.985	0.589	0.4890394E-01	2.496322	0.2375180E-02	0.2160413E-01
12102011	19	0.001	0.043	0.033	0.000	0.001	0.001	0.004	0.009	0.035	0.001	0.030	276.939	0.626	0.4413760E-01	2.161325	0.1948531E-02	0.4501271E-01
12102011	20	0.000	0.031	0.031	0.001	0.001	0.001	0.004	0.009	0.036	0.001	0.033	276.115	0.659	0.000000	2.322498	0.4559720E-02	-0.2929829
12102011	21	0.000	0.025	0.030	0.001	0.001	0.001	0.004	0.009	0.035	0.002	0.035	275.343	0.687	0.000000	2.656540	0.9155019E-02	-0.5373428
12102011	22	0.000	0.020	0.028	0.001	0.001	0.001	0.004	0.009	0.034	0.002	0.036	274.593	0.712	0.000000	2.968637	0.1193685E-01	-0.6043324
12102011	23	0.000	0.018	0.027	0.001	0.001	0.001	0.004	0.009	0.033	0.002	0.036	273.876	0.736	0.000000	3.374555	0.1255953E-01	-0.5707570
12102011	24	0.000	0.019	0.029	0.001	0.001	0.001	0.004	0.009	0.033	0.002	0.035	273.194	0.758	0.000000	3.505258	0.1045155E-01	-0.4744605
12112011	01	0.000	0.020	0.031	0.000	0.001	0.001	0.004	0.009	0.033	0.002	0.034	272.516	0.783	0.1405811E-01	3.682211	0.8845227E-02	-0.3806004
12112011	02	0.000	0.021	0.032	0.000	0.001	0.001	0.004	0.009	0.034	0.002	0.034	271.992	0.804	0.2015126E-01	4.076598	0.7917391E-02	-0.2882842
12112011	03	0.000	0.019	0.029	0.000	0.001	0.001	0.004	0.009	0.035	0.002	0.034	271.655	0.819	0.2860439E-01	4.529576	0.7016638E-02	-0.1900715
12112011	04	0.000	0.016	0.028	0.000	0.001	0.001	0.004	0.009	0.037	0.002	0.034	271.385	0.832	0.4361105E-01	4.834963	0.5779072E-02	-0.7746487E-01
12112011	05	0.000	0.015	0.027	0.000	0.001	0.001	0.004	0.009	0.038	0.002	0.034	271.146	0.844	0.5603009E-01	5.142043	0.5272302E-02	-0.1086455E-01
12112011	06	0.001	0.015	0.026	0.000	0.001	0.002	0.005	0.010	0.038	0.002	0.033	270.992	0.851	0.1382567	6.500873	0.4003599E-02	0.2105212
12112011	07	0.001	0.016	0.025	0.000	0.001	0.002	0.005	0.010	0.040	0.002	0.032	270.884	0.855	0.1798203	8.593526	0.4991187E-02	0.2359675
12112011	08	0.001	0.017	0.022	0.000	0.002	0.002	0.005	0.011	0.042	0.006	0.032	271.345	0.821	0.1876363	8.562034	0.5420053E-02	0.1985734
12112011	09	0.002	0.020	0.013	0.001	0.002	0.002	0.006	0.013	0.044	0.021	0.031	273.224	0.735	0.5552112	3.825351	0.6220007E-04	1.788880
12112011	10	0.004	0.028	0.022	0.001	0.002	0.002	0.006	0.013	0.045	0.026	0.029	276.413	0.616	0.4559768	2.360907	0.2497970E-04	1.975492
12112011	11	0.006	0.054	0.041	0.001	0.002	0.002	0.006	0.012	0.046	0.025	0.028	279.417	0.517	0.3063229	1.602684	0.1810926E-04	1.946947
12112011	12	0.007	0.078	0.054	0.001	0.002	0.002	0.005	0.010	0.045	0.019	0.029	281.518	0.450	0.1699716	1.296272	0.3760122E-04	1.537494
12112011	13	0.009	0.077	0.057	0.001	0.002	0.002	0.004	0.009	0.042	0.014	0.028	283.359	0.399	0.1063006	1.049276	0.4821258E-04	1.337729
12112011	14	0.010	0.073	0.059	0.001	0.001	0.001	0.004	0.008	0.040	0.011	0.027	284.196	0.378	0.6724542E-01	0.8865806	0.7391380E-04	1.078993
12112011	15	0.012	0.073	0.056	0.000	0.001	0.001	0.004	0.008	0.040	0.010	0.027	283.945	0.377	NaN	1.059835	0.4498936E-01	-1.627872
12112011	16	0.013	0.074	0.050	0.000	0.001	0.001	0.004	0.008	0.039	0.010	0.027	282.904	0.392	NaN	1.103469	0.3897433E-01	-1.548019
12112011	17	0.014	0.074	0.041	0.000	0.001	0.002	0.004	0.009	0.039	0.011	0.027	281.751	0.413	NaN	1.257331	0.2585427E-01	-1.313083
12112011	18	0.020	0.070	0.028	0.000	0.001	0.002	0.005	0.011	0.036	0.012	0.027	280.886	0.436	NaN	1.410566	0.5594302E-02	-0.5983523
12112011	19	0.028	0.063	0.021	0.001	0.002	0.002	0.005	0.013	0.032	0.015	0.027	280.372	0.456	0.3639063	1.070134	0.7349418E-05	2.163185
12112011	20	0.032	0.056	0.020	0.001	0.002	0.003	0.006	0.014	0.032	0.019	0.027	280.029	0.475	0.4579793	1.215932	0.3920760E-05	2.491539
12112011	21	0.035	0.050	0.019	0.002	0.002	0.003	0.006	0.015	0.034	0.024	0.027	279.698	0.495	0.5285677	1.358607	0.2760566E-05	2.692096
12112011	22	0.034	0.045	0.018	0.003	0.002	0.003	0.006	0.016	0.034	0.026	0.026	279.336	0.516	0.5689389	1.396412	0.1806067E-05	2.888280
12112011	23	0.029	0.043	0.018	0.004	0.002	0.003	0.006	0.016	0.032	0.024	0.026	279.066	0.539	0.5541164	1.471125	0.2212333E-05	2.822799
12112011	24	0.023	0.043	0.017	0.005	0.002	0.003	0.006	0.014	0.031	0.020	0.026	278.925	0.557	0.5110461	1.618555	0.4465046E-05	2.559302
12122011	01	0.017	0.045	0.017	0.005	0.002	0.002	0.005	0.012	0.031	0.015	0.025	278.640	0.588	0.4506225	1.677680	0.9519520E-05	2.246094
12122011	02	0.013	0.046	0.016	0.005	0.002	0.002	0.005	0.010	0.031	0.012	0.025	279.162	0.568	0.3465595	1.562322	0.1823839E-04	1.932784
12122011	03	0.013	0.047	0.016	0.006	0.002	0.001	0.004	0.009	0.030	0.011	0.024	279.116	0.567	0.2948269	1.461864	0.2678491E-04	1.737017
12122011	04	0.010	0.041	0.018	0.005	0.002	0.001	0.004	0.008	0.029	0.010	0.023	279.025	0.557	0.2409061	1.369042	0.3563504E-04	1.584539
12122011	05	0.009	0.034	0.019	0.005	0.002	0.001	0.005	0.008	0.029	0.010	0.023	278.692	0.571	0.2531875	1.412777	0.3364967E-04	1.623093
12122011	06	0.010	0.025	0.018	0.004	0.002	0.002	0.005	0.009	0.029	0.010	0.024	278.836	0.558	0.2943051	1.457151	0.2415669E-04	1.780467
12122011	07	0.012	0.018	0.018	0.003	0.002	0.002	0.005	0.010	0.027	0.010	0.024	278.846	0.552	0.3089471	1.344206	0.1819542E-04	1.868504
12122011	08	0.010	0.014	0.019	0.003	0.002	0.002	0.005	0.010	0.027	0.011	0.025	279.111	0.617	0.2793897	1.773926	0.3147121E-04	1.751022
12122011	09	0.007	0.011	0.019	0.003	0.002	0.002	0.005	0.009	0.031	0.010	0.026	279.415	0.717	0.2804558	2.745816	0.5952848E-04	1.663947
12122011	10	0.009	0.011	0.017	0.003	0.002	0.002	0.005	0.010	0.032	0.012	0.026	280.247	0.665	0.2981806	2.222872	0.3433693E-04	1.811153
12122011	11	0.013	0.021	0.022	0.003	0.002	0.002	0.006	0.011	0.030	0.014	0.026	282.344	0.590	0.2122500	1.555845	0.2308129E-04	1.828706
12122011	12	0.011	0.048	0.031	0.002	0.002	0.002	0.005	0.009	0.031	0.010	0.026	283.797	0.542	0.1148818	1.398555	0.4991275E-04	1.447468
12122011	13	0.012	0.050	0.034	0.002	0.002	0.002	0.004	0.009	0.031	0.009	0.026	284.815	0.516	0.8878165E-01	1.315322	0.5819157E-04	1.354172
12122011	14	0.013	0.047	0.035	0.002	0.002	0.002	0.004	0.009	0.029	0.008	0.025	284.944	0.520	0.8775097E-01	1.246339	0.4963863E-04	1.399816
12122011	15	0.012	0.045	0.034	0.001	0.002	0.001	0.004	0.009	0.025	0.007	0.022	284.657	0.531	0.7591283E-01	0.9968994	0.4114288E-04	1.384357
12122011	16	0.011	0.045	0.032	0.001	0.001	0.001	0.003	0.008	0.021	0.005	0.020	284.041	0.553	0.6244141E-01	0.9673680	0.5414704E-04	1.252017
12122011	17	0.011	0.049	0.029	0.001	0.001	0.001	0.003	0.007	0.019	0.005	0.018	283.097	0.579	0.7950801E-01	0.9937145	0.4237824E-04	1.370119
12122011	18	0.014	0.048	0.023	0.001	0.001	0.002	0.004	0.009	0.014	0.005	0.018	281.911	0.619	0.1562332	1.061344	0.1250504E-04	1.928771
12122011	19	0.020	0.042	0.019	0.001	0.002	0.002	0.005	0.013	0.006	0.006	0.017	281.244	0.646	0.2053986	0.6122943	0.1329425E-05	2.663296
12122011	20	0.021	0.028	0.023	0.001	0.002	0.003	0.006	0.016	0.003	0.004	0.017	280.751	0.682	0.7420218E-01	0.1831720	0.2376617E-06	2.886900
12122011	21	0.017	0.017	0.024	0.001	0.002	0.003	0.007	0.017	0.006	0.006	0.017	280.511	0.704	0.1845956E-03	0.3154762E-03	0.4337226E-09	2.861754
12122011	22	0.015	0.013	0.025	0.001	0.002	0.003	0.007	0.018	0.010	0.010	0.017	280.038	0.741	0.1430327	0.3511249	0.6536847E-06	2.730093
12122011	23	0.012	0.014	0.033	0.001	0.002	0.003	0.007	0.018	0.020	0.020	0.017	279.727	0.779	0.3469712	1.624372	0.5301544E-05	2.486283
12122011	24	0.011	0.011	0.037	0.001	0.002	0.003	0.007	0.018	0.022	0.022	0.018	279.545	0.791	0.3647727	2.023653	0.8044934E-05	2.400614
12132011	01	0.009	0.009	0.036	0.002	0.002	0.003	0.007	0.018	0.021	0.022	0.018	279.362	0.818	0.3547987	2.404790	0.1323059E-04	2.259498
12132011	02	0.009	0.008	0.034	0.002	0.002	0.003	0.007	0.017	0.019	0.020	0.018	279.272	0.819	0.3513123	2.390969	0.1115881E-04	2.330956
12132011	03	0.011	0.007	0.032	0.002	0.002	0.003	0.007	0.017	0.015	0.015	0.018	279.306	0.772	0.2929449	1.288834	0.3611430E-05	2.552518
12132011	04	0.011	0.007	0.030	0.002	0.002	0.003	0.007	0.017	0.012	0.013	0.019	279.312	0.807	0.3086214	1.775650	0.6182606E-05	2.458186
12132011	05	0.008	0.007	0.026	0.002	0.002	0.003	0.007	0.016	0.013	0.013	0.019	279.134	0.827	0.3303529	2.184763	0.8263813E-05	2.422224
12132011	06	0.008	0.007	0.023	0.002	0.002	0.003	0.007	0.017	0.013	0.013	0.018	278.894	0.847	0.3331235	2.016390	0.8753117E-05	2.362412
12132011	07	0.011	0.007	0.022	0.001	0.002	0.003	0.008	0.019	0.013	0.013	0.018	278.743	0.854	0.3728363	1.937274	0.9277487E-05	2.319761
12132011	08	0.017	0.007	0.013	0.002	0.002	0.004	0.009	0.023	0.008	0.018	0.018	279.037	0.799	NaN	4.093589	0.1246113E-05	3.516547
12132011	09	0.029	0.010	0.000	0.005	0.003	0.005	0.011	0.028	0.005	0.041	0.019	280.495	0.769	NaN	5.331952	0.9445237E-06	3.751673
12132011	10	0.012	0.012	0.006	0.006	0.003	0.005	0.011	0.028	0.026	0.064	0.018	283.672	0.733	NaN	6.771750	0.3760945E-04	2.255404
12132011	11	0.013	0.038	0.082	0.001	0.002	0.002	0.006	0.013	0.016	0.016	0.019	286.223	0.656	0.1045890	1.160252	0.3955376E-05	2.467365
12132011	12	0.011	0.055	0.085	0.001	0.002	0.002	0.005	0.010	0.018	0.009	0.021	288.382	0.588	0.3563696E-01	1.087495	0.3085745E-04	1.547067
12132011	13	0.002	0.075	0.087	0.000	0.002	0.002	0.004	0.009	0.028	0.004	0.024	290.094	0.533	0.1489908E-01	2.521413	0.3378356E-02	-0.1270615
12132011	14	0.002	0.071	0.086	0.000	0.001	0.001	0.004	0.008	0.027	0.003	0.023	290.754	0.516	0.1074648E-01	1.828234	0.2913545E-02	-0.2023899
12132011	15	0.002	0.062	0.079	0.000	0.001	0.001	0.003	0.007	0.024	0.003	0.021	290.201	0.533	0.9717166E-02	1.553889	0.2514489E-02	-0.2090299
12132011	16	0.002	0.059	0.075	0.000	0.001	0.001	0.003	0.006	0.024	0.002	0.020	289.248	0.565	0.1130944E-01	1.695456	0.2457720E-02	-0.1612459
12132011	17	0.009	0.055	0.066	0.000	0.001	0.001	0.003	0.007	0.020	0.003	0.020	287.809	0.603	NaN	1.453315	0.5994771E-01	-1.615413
12132011	18	0.031	0.052	0.055	0.000	0.001	0.002	0.005	0.013	0.009	0.005	0.020	285.974	0.649	NaN	2.358040	0.2274043E-01	-0.9842475
12132011	19	0.041	0.053	0.045	0.000	0.002	0.004	0.008	0.021	0.005	0.005	0.021	284.506	0.706	NaN	2.726365	0.4033489E-02	-0.1700969
12132011	20	0.035	0.051	0.029	0.001	0.002	0.005	0.010	0.027	0.008	0.013	0.022	283.420	0.754	0.2350476	0.7785562	0.1188807E-05	2.816179
12132011	21	0.038	0.048	0.000	0.005	0.002	0.005	0.012	0.031	0.008	0.044	0.023	282.627	0.778	NaN	5.728382	0.2320806E-05	3.392393
12132011	22	0.037	0.047	0.000	0.006	0.002	0.006	0.013	0.033	0.013	0.054	0.023	281.982	0.792	NaN	7.412976	0.3333050E-05	3.347151
12132011	23	0.033	0.048	0.000	0.007	0.002	0.006	0.013	0.034	0.019	0.061	0.023	281.382	0.807	NaN	9.188398	0.5671233E-05	3.209562
12132011	24	0.026	0.047	0.000	0.007	0.002	0.006	0.013	0.034	0.025	0.068	0.024	280.742	0.827	NaN	11.03866	0.1228883E-04	2.953406
12142011	01	0.013	0.044	0.000	0.008	0.002	0.006	0.013	0.033	0.036	0.075	0.023	280.187	0.847	NaN	13.81627	0.3008797E-04	2.661998
12142011	02	0.002	0.041	0.004	0.007	0.002	0.005	0.012	0.031	0.046	0.079	0.023	279.818	0.863	NaN	15.29716	0.2227940E-02	0.8367073
12142011	03	0.006	0.037	0.038	0.002	0.002	0.005	0.011	0.028	0.039	0.039	0.023	279.563	0.868	0.5218041	7.238903	0.6641485E-04	2.037408
12142011	04	0.006	0.035	0.034	0.002	0.002	0.005	0.011	0.026	0.034	0.033	0.023	279.347	0.870	0.4895597	5.877465	0.5156764E-04	2.056813
12142011	05	0.006	0.035	0.033	0.002	0.002	0.004	0.010	0.025	0.033	0.033	0.023	279.143	0.872	0.4860612	5.749801	0.5114843E-04	2.050820
12142011	06	0.006	0.035	0.031	0.002	0.002	0.004	0.010	0.026	0.036	0.036	0.023	278.943	0.877	0.5298845	7.046782	0.6686716E-04	2.022778
12142011	07	0.007	0.033	0.026	0.002	0.002	0.005	0.011	0.027	0.042	0.042	0.023	278.750	0.885	0.6199859	9.364720	0.8410570E-04	2.046669
12142011	08	0.013	0.030	0.018	0.002	0.002	0.005	0.011	0.027	0.045	0.045	0.023	278.943	0.854	0.6991503	6.607209	0.2678596E-04	2.392111
12142011	09	0.020	0.030	0.007	0.004	0.003	0.005	0.012	0.029	0.048	0.065	0.023	280.543	0.797	0.6757035	5.143393	0.1260930E-04	2.610559
12142011	10	0.001	0.026	0.000	0.007	0.003	0.005	0.013	0.030	0.079	0.125	0.023	283.908	0.738	NaN	9.880906	0.1203447E-01	-0.8563026E-01
12142011	11	0.020	0.024	0.076	0.001	0.002	0.004	0.009	0.022	0.026	0.034	0.020	287.438	0.633	0.9867549E-03	0.4408758E-02	0.5368476E-08	2.914465
12142011	12	0.017	0.022	0.053	0.001	0.002	0.002	0.005	0.010	0.005	0.006	0.015	289.774	0.562	0.3465229E-01	0.4627389	0.1583174E-05	2.465807
12142011	13	0.011	0.023	0.038	0.001	0.002	0.001	0.003	0.006	0.007	0.002	0.012	291.619	0.492	0.5631208E-02	0.4049510	0.2553675E-04	1.200237
12142011	14	0.011	0.019	0.034	0.000	0.001	0.001	0.002	0.004	0.008	0.002	0.011	292.477	0.463	NaN	0.6049614	0.2592265E-01	-1.631952
12142011	15	0.013	0.018	0.031	0.000	0.001	0.001	0.002	0.004	0.008	0.001	0.010	291.970	0.472	NaN	0.6432416	0.1777231E-01	-1.441370
12142011	16	0.015	0.023	0.028	0.000	0.001	0.001	0.002	0.004	0.009	0.001	0.010	290.776	0.504	NaN	0.7885380	0.1144802E-01	-1.161908
12142011	17	0.021	0.028	0.019	0.000	0.001	0.001	0.003	0.005	0.006	0.001	0.011	288.721	0.588	NaN	1.186255	0.1327608E-03	0.9511081
12142011	18	0.024	0.029	0.010	0.001	0.002	0.002	0.004	0.009	0.001	0.001	0.012	286.634	0.622	0.7162619E-01	0.2623133	0.6787150E-06	2.587133
12142011	19	0.020	0.029	0.007	0.001	0.002	0.002	0.005	0.012	0.000	0.001	0.012	285.254	0.643	0.000000	0.4644535E-08	0.1000046E-13	2.666922
12142011	20	0.018	0.027	0.004	0.002	0.002	0.003	0.006	0.014	0.001	0.004	0.012	284.332	0.688	0.2502596	0.1592027	0.2547027E-07	3.795917
12142011	21	0.015	0.024	0.000	0.005	0.002	0.003	0.007	0.017	0.001	0.015	0.012	283.892	0.697	NaN	2.359468	0.1106259E-09	7.328958
12142011	22	0.014	0.022	0.000	0.008	0.003	0.003	0.008	0.019	0.001	0.023	0.012	283.711	0.712	NaN	3.367608	0.1589113E-09	7.326167
12142011	23	0.010	0.019	0.000	0.010	0.003	0.003	0.008	0.018	0.004	0.028	0.012	283.584	0.716	NaN	4.047649	0.1472734E-04	2.439079
12142011	24	0.005	0.015	0.000	0.011	0.003	0.003	0.007	0.016	0.011	0.028	0.012	283.438	0.711	0.9511107	3.722295	0.2687013E-04	2.141541
12152011	01	0.010	0.012	0.009	0.006	0.003	0.002	0.007	0.013	0.005	0.011	0.011	283.301	0.700	NaN	2.240768	0.6096109E-05	2.565344
12152011	02	0.009	0.012	0.008	0.004	0.003	0.002	0.007	0.013	0.002	0.005	0.012	283.070	0.714	0.2321041	0.2640704	0.9384761E-07	3.449296
12152011	03	0.008	0.012	0.006	0.004	0.003	0.002	0.007	0.012	0.002	0.006	0.012	282.826	0.731	0.2500000	0.2888433	0.1209863E-06	3.377926
12152011	04	0.007	0.013	0.004	0.004	0.003	0.002	0.007	0.012	0.002	0.006	0.012	282.523	0.747	0.3000000	0.3183510	0.1663227E-06	3.281955
12152011	05	0.008	0.014	0.004	0.004	0.003	0.002	0.008	0.013	0.002	0.006	0.013	281.917	0.789	0.3000000	0.4032312	0.2779414E-06	3.161601
12152011	06	0.010	0.015	0.005	0.003	0.003	0.002	0.008	0.014	0.002	0.006	0.013	281.483	0.823	0.2899851	0.5009112	0.4500102E-06	3.046538
12152011	07	0.011	0.015	0.001	0.005	0.004	0.003	0.009	0.017	0.002	0.013	0.013	281.195	0.839	NaN	3.748033	0.1709108E-09	7.341034
12152011	08	0.012	0.014	0.000	0.007	0.004	0.004	0.010	0.020	0.002	0.021	0.014	281.256	0.839	NaN	5.318771	0.2432082E-09	7.339833
12152011	09	0.012	0.014	0.000	0.009	0.004	0.004	0.011	0.023	0.002	0.031	0.014	282.789	0.823	NaN	6.335942	0.3074088E-09	7.314095
12152011	10	0.005	0.016	0.003	0.010	0.004	0.004	0.010	0.020	0.017	0.040	0.014	286.658	0.722	NaN	5.042626	0.6618357E-04	1.881907
12152011	11	0.017	0.022	0.025	0.002	0.003	0.002	0.006	0.012	0.003	0.005	0.014	289.864	0.642	0.1395053E-01	0.1382427	0.1596940E-06	2.937353
12152011	12	0.016	0.023	0.023	0.002	0.002	0.001	0.004	0.006	0.010	0.004	0.014	291.867	0.570	0.1113778E-01	0.6492236	0.2996020E-04	1.335850
12152011	13	0.016	0.017	0.018	0.003	0.002	0.001	0.003	0.005	0.015	0.003	0.015	293.469	0.521	0.6891727E-02	0.7107624	0.7015991E-04	1.005635
12152011	14	0.017	0.013	0.015	0.003	0.002	0.001	0.002	0.004	0.015	0.002	0.014	294.164	0.510	0.6843209E-02	0.7120768	0.7091530E-04	1.001787
12152011	15	0.016	0.009	0.012	0.003	0.002	0.001	0.002	0.003	0.013	0.002	0.012	293.772	0.535	0.7323623E-02	0.7021656	0.5976191E-04	1.070015
12152011	16	0.018	0.007	0.009	0.003	0.002	0.001	0.002	0.003	0.012	0.001	0.012	292.853	0.581	0.9868145E-02	0.7858908	0.5791556E-04	1.132567
12152011	17	0.021	0.006	0.005	0.002	0.002	0.001	0.002	0.005	0.008	0.001	0.012	291.178	0.666	0.2050918E-01	0.8133584	0.2518869E-04	1.509076
12152011	18	0.023	0.004	0.003	0.002	0.002	0.002	0.003	0.008	0.001	0.001	0.012	289.050	0.755	0.1595729	0.7338030	0.7753876E-06	2.976061
12152011	19	0.017	0.003	0.002	0.002	0.002	0.002	0.005	0.012	0.000	0.001	0.012	287.838	0.810	0.000000	0.1179122E-08	0.1000082E-13	2.071523
12152011	20	0.018	0.003	0.001	0.003	0.003	0.003	0.006	0.015	0.000	0.004	0.012	287.007	0.817	NaN	1.347170	0.7825997E-10	7.235883
12152011	21	0.025	0.003	0.000	0.006	0.003	0.003	0.007	0.017	0.000	0.008	0.013	287.003	0.772	NaN	2.011457	0.1135669E-09	7.248259
12152011	22	0.031	0.004	0.000	0.007	0.003	0.003	0.008	0.019	0.000	0.011	0.013	286.245	0.817	NaN	3.053463	0.1716967E-09	7.250031
12152011	23	0.041	0.004	0.000	0.007	0.003	0.004	0.009	0.019	0.001	0.012	0.013	285.965	0.822	NaN	3.203557	0.1785247E-09	7.253934
12152011	24	0.042	0.004	0.000	0.007	0.003	0.004	0.009	0.020	0.001	0.013	0.013	285.054	0.877	NaN	4.555533	0.2520860E-09	7.256990
12162011	01	0.026	0.004	0.000	0.007	0.004	0.004	0.008	0.019	0.001	0.014	0.013	284.728	0.922	NaN	6.932558	0.3877942E-09	7.252292
12162011	02	0.009	0.004	0.001	0.007	0.004	0.003	0.008	0.017	0.002	0.012	0.013	284.856	0.923	NaN	6.988609	0.3933310E-09	7.249633
12162011	03	0.005	0.006	0.004	0.004	0.004	0.003	0.006	0.014	0.002	0.006	0.013	284.539	0.927	0.4000000	2.014432	0.5476536E-05	2.565647
12162011	04	0.005	0.009	0.006	0.003	0.004	0.002	0.005	0.011	0.003	0.003	0.013	284.447	0.921	0.1380551	1.292785	0.3372191E-05	2.583614
12162011	05	0.006	0.010	0.006	0.003	0.004	0.002	0.004	0.008	0.004	0.004	0.013	284.199	0.919	0.3076122	3.196956	0.1042975E-04	2.486463
12162011	06	0.008	0.011	0.007	0.003	0.004	0.001	0.004	0.007	0.007	0.006	0.013	283.862	0.932	0.3752509	4.873876	0.1892806E-04	2.410768
12162011	07	0.015	0.011	0.006	0.004	0.004	0.001	0.004	0.007	0.010	0.009	0.013	283.892	0.920	0.5031434	5.366064	0.1344106E-04	2.601222
12162011	08	0.028	0.013	0.007	0.005	0.004	0.002	0.005	0.008	0.013	0.011	0.013	284.087	0.894	0.5735741	4.291646	0.6085658E-05	2.848316
12162011	09	0.047	0.018	0.014	0.004	0.004	0.002	0.006	0.010	0.011	0.010	0.013	284.963	0.845	0.4375295	2.358069	0.2507500E-05	2.973315
12162011	10	0.051	0.018	0.017	0.003	0.004	0.003	0.008	0.014	0.007	0.013	0.013	286.700	0.852	0.3363647	1.678256	0.3086534E-05	2.735387
12162011	11	0.022	0.014	0.016	0.003	0.004	0.003	0.007	0.014	0.005	0.010	0.014	289.491	0.793	0.1670571	0.5273578	0.4192652E-06	3.099617
12162011	12	0.009	0.029	0.019	0.003	0.004	0.002	0.004	0.007	0.006	0.006	0.014	290.715	0.747	0.4741156E-01	1.199919	0.9560763E-05	2.098659
12162011	13	0.005	0.034	0.017	0.003	0.003	0.001	0.003	0.005	0.010	0.003	0.013	291.396	0.719	0.1002514E-01	1.076248	0.7247731E-04	1.171710
12162011	14	0.002	0.026	0.015	0.003	0.003	0.001	0.002	0.004	0.014	0.002	0.014	291.230	0.721	0.8058548E-04	2.085148	0.1833294E-02	0.5590465E-01
12162011	15	0.001	0.019	0.013	0.002	0.002	0.001	0.002	0.003	0.015	0.002	0.015	289.853	0.760	0.000000	1.748776	0.1830764E-02	-0.1989814E-01
12162011	16	0.002	0.013	0.012	0.001	0.002	0.001	0.002	0.004	0.018	0.001	0.015	288.370	0.820	0.2898574E-03	3.639498	0.1796655E-02	0.3065766
12162011	17	0.010	0.008	0.011	0.001	0.003	0.001	0.002	0.004	0.017	0.002	0.016	287.166	0.873	0.9716028E-01	3.293926	0.7649559E-04	1.634077
12162011	18	0.011	0.006	0.010	0.001	0.003	0.001	0.002	0.003	0.019	0.003	0.014	286.258	0.914	0.2333892	4.818746	0.4331458E-04	2.046300
12162011	19	0.011	0.005	0.009	0.001	0.003	0.001	0.002	0.002	0.018	0.004	0.012	285.570	0.939	0.3847200	7.666016	0.4171913E-04	2.264235
12162011	20	0.010	0.005	0.007	0.001	0.003	0.000	0.002	0.001	0.015	0.006	0.008	284.982	0.946	0.4300019	7.843228	0.3464928E-04	2.354801
12162011	21	0.010	0.005	0.008	0.001	0.002	0.000	0.002	0.001	0.011	0.004	0.006	284.438	0.933	0.2841817	3.661614	0.1774591E-04	2.314574
12162011	22	0.009	0.005	0.010	0.001	0.002	0.000	0.002	0.001	0.009	0.004	0.005	283.860	0.920	0.2420074	2.748517	0.1371031E-04	2.302051
12162011	23	0.008	0.005	0.013	0.001	0.002	0.000	0.001	0.001	0.008	0.003	0.005	283.387	0.893	0.1314815	1.665879	0.1676643E-04	1.997203
12162011	24	0.007	0.007	0.015	0.001	0.002	0.000	0.001	0.001	0.008	0.003	0.005	282.528	0.883	0.1281498	1.562536	0.1802056E-04	1.938062
12172011	01	0.006	0.007	0.014	0.001	0.002	0.000	0.001	0.001	0.009	0.002	0.006	281.559	0.871	0.1237727	1.635636	0.2816383E-04	1.763995
12172011	02	0.006	0.007	0.012	0.001	0.002	0.000	0.001	0.001	0.010	0.002	0.006	280.779	0.868	0.1642506	1.698294	0.2340555E-04	1.860694
12172011	03	0.005	0.007	0.011	0.001	0.002	0.000	0.001	0.001	0.011	0.002	0.007	280.081	0.875	0.1680453	2.085251	0.3785055E-04	1.741086
12172011	04	0.005	0.007	0.010	0.001	0.002	0.000	0.001	0.001	0.012	0.002	0.007	279.478	0.873	0.2012107	1.975439	0.3104127E-04	1.803724
12172011	05	0.004	0.007	0.009	0.001	0.002	0.000	0.001	0.001	0.013	0.002	0.008	278.985	0.859	0.1692380	1.977057	0.4900058E-04	1.605818
12172011	06	0.003	0.008	0.008	0.001	0.002	0.000	0.001	0.001	0.015	0.002	0.009	278.399	0.855	0.1701599	2.185428	0.6793498E-04	1.507443
12172011	07	0.002	0.008	0.007	0.001	0.002	0.000	0.001	0.001	0.018	0.001	0.010	277.834	0.848	0.1968168	2.251285	0.7266454E-04	1.491108
12172011	08	0.002	0.008	0.007	0.001	0.002	0.000	0.001	0.001	0.022	0.001	0.013	277.522	0.824	0.1383458	2.389848	0.1749656E-03	1.135418
12172011	09	0.002	0.008	0.008	0.001	0.002	0.000	0.001	0.001	0.026	0.001	0.015	278.412	0.761	0.1065764	2.101958	0.2274284E-03	0.9657794
12172011	10	0.000	0.014	0.012	0.001	0.002	0.000	0.001	0.001	0.025	0.000	0.017	280.018	0.680	0.000000	1.647638	0.3728352E-02	-0.3546552
12172011	11	0.000	0.025	0.015	0.001	0.001	0.000	0.001	0.001	0.018	0.000	0.016	281.355	0.604	0.000000	1.101864	0.9830264E-02	-0.9504372
12172011	12	0.000	0.028	0.018	0.000	0.001	0.000	0.001	0.001	0.015	0.000	0.015	282.504	0.534	0.1515746E-03	0.8171563	0.1096147E-01	-1.127564
12172011	13	0.000	0.026	0.020	0.000	0.001	0.000	0.001	0.001	0.016	0.000	0.015	283.405	0.474	0.1161098E-03	0.6478907	0.1002251E-01	-1.189475
12172011	14	0.000	0.024	0.022	0.000	0.001	0.000	0.001	0.001	0.016	0.000	0.014	283.458	0.455	0.1413226E-03	0.5705819	0.8045913E-02	-1.149257
12172011	15	0.000	0.025	0.023	0.000	0.001	0.000	0.001	0.001	0.017	0.000	0.015	282.900	0.459	0.1504421E-03	0.6162440	0.9038062E-02	-1.166323
12172011	16	0.000	0.027	0.023	0.000	0.001	0.000	0.001	0.002	0.018	0.000	0.016	281.898	0.479	0.2507567E-03	0.6545324	0.8035228E-02	-1.089067
12172011	17	0.000	0.028	0.020	0.000	0.001	0.000	0.001	0.002	0.019	0.000	0.015	280.573	0.503	0.7146597E-03	0.6732554	0.5061880E-02	-0.8761320
12172011	18	0.001	0.030	0.018	0.000	0.001	0.001	0.001	0.003	0.021	0.000	0.016	279.373	0.529	0.2598614E-01	0.9675238	0.1074028E-02	-0.4535386E-01
12172011	19	0.002	0.030	0.015	0.000	0.001	0.001	0.002	0.004	0.021	0.001	0.016	278.589	0.557	0.4601961E-01	1.564736	0.1408414E-02	0.4571048E-01
12172011	20	0.005	0.028	0.012	0.000	0.002	0.001	0.002	0.005	0.019	0.002	0.016	277.952	0.581	NaN	1.204770	0.5649253E-02	-0.6710870
12172011	21	0.006	0.024	0.012	0.000	0.002	0.001	0.002	0.005	0.019	0.003	0.016	277.328	0.600	NaN	1.320129	0.5607760E-02	-0.6281730
12172011	22	0.005	0.024	0.014	0.001	0.002	0.001	0.002	0.005	0.019	0.004	0.016	276.696	0.618	0.1892211	1.194370	0.5006190E-04	1.377631
12172011	23	0.004	0.023	0.015	0.001	0.002	0.001	0.002	0.006	0.019	0.005	0.016	275.989	0.638	0.2236235	1.220701	0.3807365E-04	1.505985
12172011	24	0.003	0.024	0.018	0.001	0.002	0.001	0.002	0.006	0.019	0.005	0.016	275.259	0.659	0.2098274	1.317863	0.4906356E-04	1.429111
12182011	01	0.002	0.027	0.019	0.000	0.002	0.001	0.003	0.006	0.018	0.006	0.015	274.541	0.680	NaN	1.497751	0.1567944E-01	-1.019891
12182011	02	0.001	0.029	0.022	0.000	0.002	0.001	0.003	0.006	0.018	0.003	0.015	273.958	0.697	NaN	1.557362	0.1668434E-01	-1.029919
12182011	03	0.001	0.032	0.024	0.000	0.002	0.001	0.003	0.006	0.018	0.001	0.015	273.628	0.707	NaN	1.616866	0.1666135E-01	-1.013036
12182011	04	0.001	0.036	0.025	0.000	0.002	0.001	0.003	0.006	0.018	0.001	0.015	273.411	0.715	NaN	1.680196	0.1766139E-01	-1.021665
12182011	05	0.001	0.040	0.026	0.000	0.002	0.001	0.003	0.006	0.018	0.001	0.016	273.210	0.723	0.7030642E-01	2.803892	0.2141082E-02	0.1171280
12182011	06	0.001	0.042	0.029	0.000	0.002	0.001	0.003	0.006	0.020	0.001	0.017	272.997	0.731	0.7210636E-01	3.032677	0.2387168E-02	0.1039432
12182011	07	0.001	0.041	0.025	0.000	0.002	0.001	0.003	0.006	0.023	0.007	0.018	272.773	0.739	NaN	2.152832	0.2466506E-01	-1.059072
12182011	08	0.001	0.040	0.024	0.000	0.002	0.001	0.003	0.007	0.025	0.011	0.018	273.034	0.723	NaN	2.117165	0.2365608E-01	-1.048188
12182011	09	0.003	0.039	0.023	0.001	0.003	0.001	0.004	0.008	0.026	0.014	0.018	274.603	0.669	0.3760626	1.799364	0.2326332E-04	1.888447
12182011	10	0.004	0.041	0.027	0.000	0.003	0.001	0.004	0.008	0.026	0.015	0.019	277.197	0.595	NaN	1.580271	0.2479742E-01	-1.195675
12182011	11	0.006	0.044	0.036	0.000	0.002	0.001	0.004	0.008	0.025	0.012	0.019	280.196	0.516	NaN	1.167461	0.3093272E-01	-1.423176
12182011	12	0.006	0.047	0.045	0.000	0.002	0.001	0.004	0.008	0.023	0.008	0.020	282.200	0.466	NaN	0.9537855	0.3998227E-01	-1.622417
12182011	13	0.008	0.048	0.043	0.000	0.002	0.001	0.003	0.008	0.021	0.006	0.020	283.777	0.432	NaN	0.8297648	0.3698680E-01	-1.649092
12182011	14	0.009	0.050	0.039	0.000	0.002	0.001	0.003	0.007	0.019	0.004	0.019	284.330	0.422	NaN	0.7863021	0.3197856E-01	-1.609269
12182011	15	0.008	0.050	0.032	0.000	0.001	0.001	0.003	0.006	0.017	0.003	0.017	283.520	0.442	NaN	0.7407900	0.2596718E-01	-1.544730
12182011	16	0.008	0.051	0.028	0.000	0.001	0.001	0.002	0.006	0.017	0.003	0.016	282.208	0.477	NaN	0.8334406	0.2093300E-01	-1.399957
12182011	17	0.008	0.053	0.025	0.000	0.001	0.001	0.003	0.006	0.017	0.004	0.016	280.473	0.520	NaN	0.9580130	0.1786781E-01	-1.270700
12182011	18	0.009	0.054	0.022	0.000	0.001	0.001	0.003	0.007	0.017	0.005	0.016	278.835	0.568	NaN	1.154595	0.1269361E-01	-1.041156
12182011	19	0.008	0.055	0.021	0.000	0.001	0.001	0.003	0.007	0.018	0.007	0.016	277.566	0.617	NaN	1.385333	0.1361461E-01	-0.9924510
12182011	20	0.008	0.055	0.021	0.000	0.001	0.001	0.003	0.008	0.018	0.010	0.016	276.649	0.651	NaN	1.537553	0.1457620E-01	-0.9768144
12182011	21	0.008	0.053	0.018	0.000	0.001	0.002	0.003	0.009	0.018	0.012	0.016	276.000	0.673	NaN	1.816892	0.9179785E-02	-0.7035034
12182011	22	0.010	0.049	0.014	0.000	0.001	0.002	0.004	0.011	0.016	0.014	0.016	275.527	0.692	NaN	1.993296	0.2362952E-02	-0.7388309E-01
12182011	23	0.009	0.045	0.014	0.000	0.001	0.002	0.005	0.012	0.014	0.014	0.016	275.162	0.708	NaN	1.858531	0.4276329E-02	-0.3619013
12182011	24	0.008	0.044	0.016	0.000	0.001	0.002	0.005	0.013	0.014	0.014	0.016	274.849	0.720	NaN	1.700754	0.7465914E-02	-0.6424416
12192011	01	0.007	0.045	0.018	0.000	0.001	0.002	0.005	0.013	0.014	0.014	0.016	274.620	0.719	NaN	1.638411	0.1055494E-01	-0.8090332
12192011	02	0.006	0.049	0.022	0.000	0.001	0.002	0.005	0.014	0.018	0.018	0.016	274.266	0.724	NaN	1.696303	0.1578039E-01	-0.9686145
12192011	03	0.005	0.056	0.032	0.000	0.001	0.002	0.005	0.014	0.022	0.022	0.016	274.079	0.726	NaN	1.985721	0.2688509E-01	-1.131593
12192011	04	0.010	0.067	0.055	0.000	0.001	0.002	0.005	0.014	0.014	0.014	0.015	273.818	0.733	NaN	1.683656	0.4499380E-01	-1.426899
12192011	05	0.011	0.075	0.065	0.000	0.001	0.003	0.005	0.014	0.007	0.007	0.015	273.540	0.745	NaN	1.435926	0.5399876E-01	-1.575252
12192011	06	0.009	0.079	0.059	0.000	0.002	0.003	0.005	0.015	0.007	0.007	0.016	273.382	0.753	NaN	1.289299	0.4999897E-01	-1.588608
12192011	07	0.009	0.082	0.053	0.000	0.002	0.003	0.006	0.015	0.007	0.007	0.016	273.255	0.761	NaN	1.363669	0.4399743E-01	-1.508718
12192011	08	0.008	0.083	0.044	0.000	0.002	0.003	0.006	0.016	0.012	0.012	0.016	273.676	0.744	NaN	1.387922	0.3600005E-01	-1.413938
12192011	09	0.005	0.080	0.032	0.001	0.002	0.003	0.006	0.017	0.025	0.025	0.016	275.470	0.686	0.4114500	1.269220	0.2785710E-05	2.658601
12192011	10	0.009	0.073	0.042	0.001	0.002	0.003	0.006	0.016	0.028	0.028	0.016	278.630	0.583	0.3261471	0.7384062	0.5717737E-06	3.111071
12192011	11	0.018	0.061	0.046	0.000	0.002	0.003	0.005	0.014	0.018	0.019	0.015	281.945	0.493	NaN	0.7657783	0.2899528E-01	-1.578224
12192011	12	0.023	0.056	0.048	0.000	0.002	0.002	0.005	0.012	0.008	0.009	0.015	284.543	0.430	NaN	0.5304750	0.2599627E-01	-1.690246
12192011	13	0.019	0.056	0.047	0.000	0.002	0.002	0.004	0.010	0.009	0.006	0.016	286.404	0.390	NaN	0.6255982	0.2697410E-01	-1.634652
12192011	14	0.020	0.058	0.047	0.000	0.001	0.001	0.004	0.009	0.009	0.003	0.016	287.286	0.374	NaN	0.5107282	0.2799692E-01	-1.738920
12192011	15	0.018	0.060	0.044	0.000	0.001	0.001	0.003	0.008	0.012	0.002	0.016	286.824	0.390	NaN	0.6039361	0.2598362E-01	-1.633709
12192011	16	0.017	0.065	0.040	0.000	0.001	0.001	0.003	0.008	0.013	0.003	0.017	285.724	0.420	NaN	0.7125646	0.2494675E-01	-1.544190
12192011	17	0.015	0.072	0.033	0.000	0.001	0.001	0.004	0.008	0.015	0.004	0.018	284.208	0.466	NaN	0.8918791	0.1984116E-01	-1.347261
12192011	18	0.018	0.074	0.021	0.000	0.002	0.002	0.004	0.010	0.011	0.004	0.018	282.405	0.523	NaN	1.165895	0.1575014E-02	-0.1306249
12192011	19	0.023	0.067	0.013	0.001	0.002	0.002	0.006	0.013	0.005	0.004	0.018	280.984	0.587	0.2367063	0.5326623	0.9604441E-06	2.743980
12192011	20	0.023	0.058	0.012	0.001	0.002	0.003	0.007	0.017	0.002	0.002	0.018	280.628	0.577	0.3777057E-01	0.5610489E-01	0.5734968E-07	2.990470
12192011	21	0.021	0.050	0.012	0.001	0.002	0.004	0.008	0.021	0.002	0.003	0.018	280.137	0.619	0.1072288E-03	0.6318132E-04	0.4963471E-10	3.104803
12192011	22	0.017	0.044	0.012	0.002	0.003	0.004	0.009	0.023	0.003	0.006	0.018	280.000	0.656	NaN	2.177113	0.8312501E-10	7.418149
12192011	23	0.013	0.037	0.013	0.002	0.003	0.004	0.009	0.023	0.004	0.007	0.019	279.862	0.710	0.2155207	0.3308009	0.2592643E-06	3.105824
12192011	24	0.008	0.029	0.015	0.002	0.003	0.004	0.009	0.021	0.004	0.004	0.019	279.749	0.739	0.6055832E-04	0.8273564E-04	0.2438373E-09	2.530592
12202011	01	0.006	0.013	0.016	0.002	0.003	0.004	0.009	0.020	0.005	0.005	0.020	279.434	0.780	0.4965067E-04	0.9468063E-04	0.3610346E-09	2.418712
12202011	02	0.004	0.006	0.018	0.002	0.003	0.003	0.008	0.019	0.009	0.006	0.021	279.880	0.765	0.1248371	0.5210660	0.1236977E-05	2.624531
12202011	03	0.005	0.004	0.017	0.002	0.003	0.003	0.008	0.018	0.010	0.006	0.021	279.809	0.799	0.2141970	0.9767845	0.2329881E-05	2.622465
12202011	04	0.004	0.003	0.015	0.003	0.003	0.003	0.008	0.017	0.010	0.007	0.021	279.935	0.826	0.2576513	1.494408	0.4090518E-05	2.562691
12202011	05	0.004	0.003	0.015	0.003	0.003	0.003	0.008	0.016	0.010	0.007	0.020	280.186	0.839	0.2612854	1.616565	0.4562279E-05	2.549411
12202011	06	0.007	0.004	0.013	0.003	0.004	0.003	0.008	0.016	0.007	0.008	0.020	280.517	0.850	0.2666278	1.724128	0.4818195E-05	2.553685
12202011	07	0.009	0.004	0.012	0.003	0.004	0.003	0.009	0.017	0.005	0.005	0.019	280.856	0.849	0.1858450	0.9313961	0.2120363E-05	2.642724
12202011	08	0.010	0.004	0.006	0.003	0.004	0.004	0.010	0.022	0.003	0.007	0.019	281.310	0.850	0.3560106	0.8878416	0.1207021E-05	2.866621
12202011	09	0.012	0.003	0.000	0.006	0.004	0.005	0.011	0.025	0.003	0.016	0.019	282.530	0.864	NaN	4.626272	0.2273386E-09	7.308558
12202011	10	0.012	0.004	0.000	0.009	0.004	0.005	0.011	0.025	0.003	0.026	0.018	284.794	0.858	NaN	7.328269	0.3965864E-09	7.266664
12202011	11	0.011	0.010	0.017	0.004	0.004	0.003	0.008	0.017	0.004	0.009	0.016	286.827	0.806	0.000000	0.1138299E-08	0.1000022E-13	2.056247
12202011	12	0.012	0.012	0.017	0.003	0.003	0.002	0.005	0.009	0.004	0.005	0.014	287.899	0.784	0.1008893	1.043776	0.3362764E-05	2.491911
12202011	13	0.010	0.013	0.017	0.003	0.003	0.001	0.004	0.007	0.005	0.004	0.012	288.575	0.785	0.7044828E-01	1.022628	0.5315701E-05	2.284157
12202011	14	0.010	0.016	0.019	0.003	0.002	0.001	0.003	0.005	0.006	0.003	0.011	288.753	0.780	0.3173023E-01	1.052308	0.2020789E-04	1.716622
12202011	15	0.012	0.016	0.022	0.002	0.002	0.001	0.003	0.005	0.006	0.003	0.011	287.989	0.800	0.4885024E-01	1.195430	0.1674687E-04	1.853591
12202011	16	0.015	0.012	0.017	0.002	0.002	0.001	0.004	0.006	0.004	0.004	0.011	287.500	0.837	0.1046379	1.381089	0.6401503E-05	2.333940
12202011	17	0.017	0.009	0.012	0.002	0.003	0.002	0.005	0.009	0.002	0.003	0.011	286.974	0.879	0.1062835	0.8509468	0.1396586E-05	2.784835
12202011	18	0.016	0.007	0.004	0.004	0.003	0.003	0.006	0.013	0.002	0.010	0.011	286.079	0.914	NaN	5.420878	0.3201129E-09	7.228766
12202011	19	0.011	0.007	0.000	0.010	0.003	0.003	0.007	0.015	0.008	0.027	0.011	285.768	0.929	NaN	14.35935	0.9746002E-04	2.168308
12202011	20	0.007	0.007	0.000	0.012	0.004	0.003	0.008	0.016	0.014	0.033	0.010	285.630	0.939	NaN	20.06543	0.1187744E-03	2.227726
12202011	21	0.003	0.007	0.000	0.012	0.004	0.003	0.007	0.013	0.017	0.030	0.010	285.403	0.960	0.9387282	27.10149	0.2251480E-03	2.080525
12202011	22	0.007	0.007	0.010	0.004	0.003	0.002	0.006	0.010	0.007	0.010	0.010	285.009	0.956	0.4108029	6.875014	0.4619637E-04	2.172666
12202011	23	0.007	0.006	0.009	0.003	0.003	0.002	0.005	0.008	0.003	0.004	0.010	285.976	0.913	0.1060950	1.144248	0.2914105E-05	2.594015
12202011	24	0.007	0.005	0.008	0.003	0.003	0.002	0.005	0.007	0.003	0.003	0.010	285.889	0.918	0.1740813	1.930352	0.5283403E-05	2.562723
12212011	01	0.007	0.006	0.005	0.003	0.003	0.001	0.005	0.006	0.003	0.003	0.011	285.841	0.915	0.2729387	2.879057	0.7529109E-05	2.582507
12212011	02	0.008	0.005	0.004	0.003	0.003	0.001	0.005	0.006	0.003	0.003	0.011	285.908	0.910	0.2741903	2.482140	0.5635426E-05	2.643899
12212011	03	0.009	0.005	0.003	0.004	0.003	0.001	0.005	0.006	0.003	0.003	0.011	286.243	0.899	0.2618850	2.197870	0.4484612E-05	2.690277
12212011	04	0.010	0.004	0.002	0.004	0.004	0.001	0.005	0.006	0.003	0.003	0.011	286.367	0.911	0.3058393	2.477449	0.4655771E-05	2.726013
12212011	05	0.010	0.003	0.002	0.004	0.004	0.001	0.005	0.006	0.004	0.003	0.012	286.609	0.912	0.2864373	2.781885	0.6617272E-05	2.623660
12212011	06	0.010	0.003	0.002	0.004	0.004	0.001	0.004	0.005	0.005	0.002	0.012	286.910	0.905	0.1892870	2.852631	0.1439487E-04	2.297038
12212011	07	0.009	0.002	0.002	0.004	0.003	0.001	0.003	0.003	0.007	0.001	0.010	287.216	0.907	0.1311117	2.695851	0.2149210E-04	2.098417
12212011	08	0.007	0.001	0.001	0.002	0.002	0.000	0.001	0.001	0.007	0.000	0.006	287.749	0.904	0.4623735E-01	1.641743	0.3484953E-04	1.673108
12212011	09	0.011	0.001	0.002	0.002	0.002	0.000	0.001	0.001	0.008	0.000	0.007	288.399	0.908	0.6156236E-01	2.202219	0.3867118E-04	1.755473
12212011	10	0.013	0.001	0.002	0.002	0.003	0.000	0.001	0.001	0.009	0.000	0.007	289.581	0.917	0.8378524E-01	2.504926	0.2690141E-04	1.969020
12212011	11	0.011	0.001	0.004	0.002	0.003	0.000	0.001	0.001	0.008	0.000	0.007	290.888	0.882	0.3000301E-01	1.677477	0.4393649E-04	1.581831
12212011	12	0.004	0.003	0.004	0.001	0.001	0.000	0.000	0.000	0.006	0.000	0.005	291.057	0.869	0.2739787E-02	1.289784	0.3519112E-03	0.5640839
12212011	13	0.004	0.003	0.005	0.000	0.001	0.000	0.000	0.000	0.006	0.000	0.004	290.866	0.880	0.4994035E-02	1.111680	0.1353691E-03	0.9144604
12212011	14	0.003	0.003	0.006	0.000	0.001	0.000	0.000	0.000	0.006	0.000	0.004	290.728	0.886	0.4186273E-02	1.206132	0.1784641E-03	0.8298439
12212011	15	0.002	0.003	0.007	0.000	0.000	0.000	0.000	0.000	0.008	0.000	0.005	290.470	0.888	0.2665579E-02	1.497006	0.4858146E-03	0.4887530
12212011	16	0.001	0.003	0.006	0.000	0.000	0.000	0.000	0.000	0.010	0.000	0.006	290.157	0.896	0.9564877E-02	1.936475	0.4190424E-03	0.6647540
12212011	17	0.001	0.003	0.005	0.000	0.000	0.000	0.000	0.001	0.011	0.000	0.007	289.562	0.901	0.3260279E-01	1.967213	0.1271738E-02	0.1894537
12212011	18	0.012	0.003	0.004	0.001	0.000	0.000	0.001	0.002	0.010	0.000	0.007	287.947	0.934	0.9002215E-01	2.452183	0.2602209E-04	1.974211
12212011	19	0.021	0.002	0.004	0.001	0.001	0.001	0.002	0.004	0.002	0.001	0.006	286.812	0.945	0.3842405	2.473850	0.2772936E-05	2.950433
12212011	20	0.022	0.002	0.001	0.003	0.001	0.001	0.003	0.007	0.000	0.005	0.006	286.077	0.911	0.1666667	0.3963507	0.4715668E-06	2.924536
12212011	21	0.024	0.003	0.000	0.005	0.001	0.002	0.004	0.008	0.000	0.010	0.005	285.452	0.932	NaN	5.757466	0.3341561E-09	7.236282
12212011	22	0.018	0.002	0.000	0.006	0.001	0.002	0.004	0.009	0.000	0.012	0.005	285.498	0.890	NaN	4.454052	0.8362215E-06	3.726434
12212011	23	0.012	0.003	0.000	0.007	0.001	0.002	0.004	0.008	0.002	0.014	0.004	285.377	0.933	0.8766347	6.879428	0.4076016E-05	3.227316
12212011	24	0.006	0.004	0.000	0.006	0.001	0.001	0.003	0.007	0.005	0.014	0.004	285.127	0.939	0.7259976	6.098141	0.1101228E-04	2.743320
12222011	01	0.005	0.008	0.000	0.005	0.001	0.001	0.003	0.005	0.009	0.014	0.004	284.647	0.955	0.8488148	11.03410	0.6588978E-04	2.223919
12222011	02	0.011	0.010	0.007	0.003	0.001	0.001	0.002	0.004	0.005	0.006	0.004	284.329	0.947	0.1300953	1.089283	0.6238226E-05	2.242079
12222011	03	0.015	0.014	0.008	0.001	0.001	0.001	0.002	0.003	0.002	0.002	0.004	284.240	0.940	0.2558857	1.774476	0.3747398E-05	2.675340
12222011	04	0.018	0.018	0.008	0.001	0.001	0.001	0.002	0.003	0.003	0.002	0.004	284.152	0.942	0.3238861	2.106744	0.4016142E-05	2.719803
12222011	05	0.021	0.020	0.008	0.001	0.001	0.001	0.002	0.002	0.004	0.004	0.004	284.115	0.945	0.5737545	5.315463	0.9755810E-05	2.736278
12222011	06	0.023	0.018	0.008	0.001	0.001	0.001	0.002	0.002	0.007	0.006	0.003	284.215	0.943	0.5431710	4.193818	0.7720038E-05	2.734990
12222011	07	0.026	0.014	0.008	0.002	0.002	0.001	0.002	0.001	0.008	0.007	0.003	284.368	0.939	0.6705862	6.137769	0.8854210E-05	2.840861
12222011	08	0.031	0.012	0.008	0.002	0.002	0.001	0.003	0.001	0.009	0.008	0.003	284.737	0.926	0.6455875	5.290254	0.6915607E-05	2.883646
12222011	09	0.035	0.010	0.010	0.002	0.002	0.001	0.003	0.001	0.008	0.009	0.004	286.643	0.905	0.4345424	3.554869	0.5560589E-05	2.805703
12222011	10	0.021	0.006	0.013	0.001	0.003	0.001	0.003	0.001	0.003	0.005	0.004	289.531	0.903	0.1508724	1.656917	0.3865194E-05	2.632129
12222011	11	0.011	0.008	0.012	0.001	0.003	0.001	0.002	0.001	0.002	0.001	0.004	291.794	0.827	0.5318046E-01	0.7249075	0.2467338E-05	2.468054
12222011	12	0.002	0.008	0.011	0.001	0.001	0.000	0.001	0.001	0.006	0.000	0.005	292.566	0.787	0.7136703E-02	0.6608757	0.3771081E-04	1.243654
12222011	13	0.001	0.006	0.011	0.000	0.001	0.000	0.000	0.001	0.007	0.000	0.005	293.188	0.761	NaN	0.6718531	0.9695953E-02	-1.159316
12222011	14	0.002	0.005	0.008	0.000	0.001	0.000	0.000	0.001	0.006	0.000	0.004	293.033	0.756	NaN	0.6797016	0.4485208E-02	-0.8194643
12222011	15	0.005	0.004	0.006	0.000	0.000	0.000	0.000	0.001	0.004	0.000	0.004	292.561	0.755	NaN	0.6573797	0.2519511E-02	-0.5835000
12222011	16	0.013	0.003	0.004	0.000	0.000	0.000	0.001	0.002	0.001	0.000	0.003	291.308	0.796	NaN	0.5565446	0.9690561E-05	1.759151
12222011	17	0.020	0.001	0.003	0.001	0.001	0.001	0.001	0.004	0.000	0.000	0.004	290.002	0.857	0.000000	0.8710951E-09	0.5875653E-19	7.171010
12222011	18	0.025	0.000	0.002	0.001	0.000	0.000	0.001	0.002	0.001	0.000	0.003	289.069	0.914	0.3039509E-01	0.3745034	0.1315705E-05	2.454297
12222011	19	0.027	0.000	0.002	0.000	0.000	0.000	0.001	0.001	0.001	0.000	0.002	288.579	0.924	NaN	1.036645	0.3266844E-05	2.501502
12222011	20	0.029	0.001	0.002	0.000	0.001	0.000	0.001	0.000	0.001	0.000	0.002	287.960	0.926	NaN	1.674205	0.4496627E-05	2.570922
12222011	21	0.032	0.001	0.002	0.000	0.001	0.000	0.001	0.000	0.002	0.001	0.002	286.975	0.938	NaN	2.426575	0.4739854E-05	2.709229
12222011	22	0.035	0.001	0.003	0.001	0.001	0.000	0.002	0.000	0.003	0.001	0.003	285.919	0.900	0.2126977	1.211197	0.2860852E-05	2.626719
12222011	23	0.026	0.001	0.003	0.000	0.001	0.000	0.002	0.000	0.005	0.001	0.004	284.661	0.916	NaN	2.891957	0.8321059E-05	2.541013
12222011	24	0.017	0.001	0.004	0.000	0.001	0.000	0.002	0.000	0.012	0.002	0.007	283.730	0.908	NaN	4.177234	0.2707294E-04	2.188353
12232011	01	0.014	0.001	0.006	0.000	0.001	0.000	0.002	0.000	0.020	0.003	0.011	282.875	0.898	NaN	5.746460	0.8142481E-04	1.848644
12232011	02	0.013	0.001	0.009	0.001	0.002	0.000	0.002	0.000	0.027	0.007	0.013	282.211	0.892	0.4093420	5.342604	0.4695891E-04	2.056035
12232011	03	0.012	0.002	0.012	0.001	0.002	0.000	0.002	0.000	0.032	0.010	0.013	281.849	0.874	0.4305463	5.019232	0.4212295E-04	2.076118
12232011	04	0.012	0.003	0.014	0.001	0.002	0.000	0.002	0.000	0.032	0.011	0.013	281.517	0.877	0.4522517	5.812916	0.4844918E-04	2.079108
12232011	05	0.011	0.003	0.013	0.001	0.002	0.000	0.002	0.000	0.030	0.012	0.012	281.249	0.887	0.4589826	6.122280	0.4924664E-04	2.094537
12232011	06	0.010	0.004	0.013	0.001	0.002	0.000	0.002	0.000	0.024	0.011	0.010	281.003	0.894	0.4021778	5.119211	0.4426188E-04	2.063173
12232011	07	0.008	0.008	0.016	0.001	0.002	0.000	0.002	0.000	0.016	0.009	0.006	280.726	0.897	0.3546991	4.169921	0.3069744E-04	2.133026
12232011	08	0.006	0.013	0.019	0.000	0.002	0.000	0.001	0.000	0.008	0.006	0.003	280.499	0.895	NaN	3.672992	0.1271151E-01	-0.5391773
12232011	09	0.005	0.017	0.019	0.000	0.001	0.000	0.001	0.000	0.004	0.003	0.002	281.215	0.890	NaN	2.113385	0.1439574E-01	-0.8332552
12232011	10	0.005	0.019	0.017	0.000	0.001	0.000	0.001	0.000	0.003	0.001	0.002	283.223	0.790	NaN	0.8920189	0.1182075E-01	-1.122271
12232011	11	0.004	0.024	0.021	0.000	0.001	0.000	0.001	0.000	0.004	0.000	0.003	284.042	0.735	NaN	0.6853545	0.1695567E-01	-1.393400
12232011	12	0.003	0.027	0.025	0.000	0.001	0.000	0.000	0.000	0.005	0.000	0.004	284.671	0.692	0.2809346E-02	0.4692179	0.2641205E-03	0.2495725
12232011	13	0.002	0.024	0.028	0.000	0.001	0.000	0.000	0.001	0.007	0.000	0.005	285.069	0.656	NaN	0.5213701	0.2599714E-01	-1.697780
12232011	14	0.001	0.021	0.033	0.000	0.001	0.000	0.001	0.001	0.010	0.000	0.006	284.915	0.646	NaN	0.6307164	0.2999469E-01	-1.677210
12232011	15	0.001	0.020	0.036	0.000	0.001	0.000	0.001	0.001	0.013	0.000	0.009	284.420	0.646	0.9811640E-02	0.7955451	0.1089111E-02	-0.1364074
12232011	16	0.000	0.019	0.036	0.000	0.001	0.000	0.001	0.002	0.015	0.000	0.012	283.743	0.650	0.1139224E-02	0.9012864	0.2905135E-02	-0.5083034
12232011	17	0.000	0.018	0.033	0.000	0.001	0.000	0.001	0.002	0.018	0.000	0.015	282.651	0.664	0.8104444E-03	1.148771	0.5686033E-02	-0.6945757
12232011	18	0.000	0.015	0.027	0.000	0.001	0.001	0.001	0.003	0.022	0.000	0.018	281.585	0.689	0.3534853E-02	1.639851	0.3511162E-02	-0.3306465
12232011	19	0.001	0.012	0.021	0.000	0.001	0.001	0.002	0.005	0.026	0.000	0.021	280.820	0.720	0.3643858E-01	2.050247	0.1468824E-02	0.1448364
12232011	20	0.001	0.010	0.020	0.000	0.002	0.001	0.002	0.005	0.030	0.001	0.023	280.273	0.743	0.4914516E-01	2.752912	0.1738438E-02	0.1996331
12232011	21	0.001	0.010	0.021	0.001	0.002	0.001	0.003	0.006	0.034	0.001	0.024	279.908	0.753	0.1259208E-02	4.233932	0.1363555E-02	0.4920712
12232011	22	0.003	0.010	0.019	0.001	0.002	0.001	0.003	0.006	0.036	0.004	0.025	279.525	0.768	0.1928233	3.263995	0.1684011E-03	1.287404
12232011	23	0.003	0.012	0.021	0.001	0.002	0.001	0.003	0.007	0.037	0.008	0.026	279.145	0.778	0.2027436	3.530493	0.1764291E-03	1.301265
12232011	24	0.003	0.011	0.022	0.001	0.002	0.001	0.004	0.007	0.040	0.009	0.027	278.791	0.788	0.2496406	4.021984	0.1632037E-03	1.391710
12242011	01	0.003	0.010	0.021	0.001	0.002	0.001	0.004	0.008	0.044	0.010	0.030	278.388	0.802	0.2663097	4.607922	0.2038097E-03	1.354280
12242011	02	0.002	0.010	0.025	0.001	0.002	0.001	0.004	0.008	0.049	0.008	0.033	278.018	0.811	0.2467215E-02	7.763645	0.1511816E-02	0.7105666
12242011	03	0.001	0.013	0.036	0.001	0.002	0.001	0.004	0.007	0.053	0.003	0.038	277.690	0.819	0.1073420E-02	5.886117	0.1219380E-02	0.6836897
12242011	04	0.000	0.015	0.042	0.001	0.002	0.001	0.004	0.007	0.054	0.005	0.042	277.374	0.827	0.000000	6.790744	0.5488247E-02	0.9248371E-01
12242011	05	0.000	0.016	0.042	0.001	0.002	0.001	0.004	0.007	0.053	0.005	0.044	277.091	0.834	0.000000	7.062790	0.8868949E-02	-0.9889587E-01
12242011	06	0.000	0.016	0.042	0.001	0.002	0.001	0.004	0.007	0.051	0.005	0.045	276.781	0.841	0.000000	7.578014	0.1134841E-01	-0.1753795
12242011	07	0.000	0.017	0.043	0.001	0.002	0.001	0.004	0.007	0.049	0.005	0.045	276.448	0.846	0.000000	8.147955	0.1215423E-01	-0.1736789
12242011	08	0.000	0.018	0.042	0.001	0.002	0.001	0.004	0.007	0.049	0.004	0.045	276.464	0.840	0.000000	7.649569	0.1271608E-01	-0.2207164
12242011	09	0.000	0.019	0.044	0.001	0.002	0.001	0.004	0.007	0.051	0.005	0.045	277.736	0.795	0.000000	6.117357	0.1274824E-01	-0.3188863
12242011	10	0.000	0.028	0.060	0.001	0.002	0.001	0.004	0.007	0.053	0.005	0.045	279.756	0.736	0.000000	4.724091	0.1233545E-01	-0.4168368
12242011	11	0.000	0.034	0.063	0.000	0.002	0.001	0.004	0.006	0.051	0.004	0.042	281.679	0.674	0.4194379E-02	3.449282	0.1174030E-01	-0.5319504
12242011	12	0.000	0.038	0.054	0.000	0.002	0.001	0.003	0.006	0.040	0.003	0.032	283.081	0.634	0.5688250E-02	2.321945	0.4858782E-02	-0.3206754
12242011	13	0.001	0.041	0.052	0.000	0.001	0.001	0.003	0.006	0.039	0.003	0.029	284.263	0.597	0.2085590E-01	1.992217	0.2186605E-02	-0.4043376E-01
12242011	14	0.002	0.041	0.050	0.000	0.001	0.001	0.003	0.006	0.041	0.003	0.029	284.518	0.595	0.2652925E-01	2.506356	0.2588372E-02	-0.1398403E-01
12242011	15	0.002	0.038	0.047	0.000	0.001	0.001	0.003	0.006	0.037	0.003	0.025	284.128	0.613	NaN	1.959049	0.4276030E-01	-1.338995
12242011	16	0.005	0.038	0.043	0.000	0.001	0.001	0.003	0.006	0.032	0.006	0.023	283.347	0.645	NaN	2.120897	0.3966104E-01	-1.271845
12242011	17	0.005	0.038	0.041	0.000	0.001	0.001	0.003	0.007	0.032	0.007	0.023	282.289	0.681	NaN	2.347285	0.3651960E-01	-1.191960
12242011	18	0.006	0.035	0.035	0.000	0.001	0.001	0.003	0.007	0.032	0.008	0.023	281.270	0.723	NaN	2.786067	0.3010286E-01	-1.033616
12242011	19	0.010	0.022	0.024	0.001	0.001	0.002	0.004	0.010	0.030	0.012	0.023	280.467	0.776	0.3593461	3.261067	0.3139193E-04	2.016542
12242011	20	0.010	0.012	0.017	0.001	0.001	0.002	0.005	0.012	0.028	0.013	0.024	279.821	0.815	0.4589625	3.920610	0.2586121E-04	2.180705
12242011	21	0.013	0.007	0.011	0.001	0.002	0.002	0.005	0.014	0.024	0.015	0.024	279.341	0.823	0.5566465	3.656506	0.1412163E-04	2.413182
12242011	22	0.016	0.005	0.008	0.001	0.002	0.003	0.006	0.016	0.019	0.015	0.025	278.929	0.824	0.6443554	3.558367	0.7903720E-05	2.653419
12242011	23	0.015	0.004	0.008	0.001	0.002	0.003	0.007	0.018	0.016	0.016	0.025	278.541	0.830	0.6636273	3.491882	0.6164391E-05	2.753169
12242011	24	0.011	0.004	0.010	0.001	0.002	0.003	0.007	0.018	0.017	0.017	0.024	278.244	0.825	0.5996418	3.273193	0.7518242E-05	2.638855
12252011	01	0.008	0.004	0.014	0.001	0.002	0.003	0.007	0.018	0.018	0.019	0.024	277.951	0.822	0.5275921	3.194399	0.1009962E-04	2.500084
12252011	02	0.006	0.005	0.020	0.001	0.002	0.003	0.006	0.017	0.022	0.022	0.023	277.714	0.821	0.5064250	3.661740	0.1517427E-04	2.382580
12252011	03	0.005	0.005	0.025	0.001	0.002	0.003	0.006	0.017	0.024	0.024	0.023	277.677	0.823	0.4766176	3.894363	0.1954741E-04	2.299347
12252011	04	0.006	0.004	0.026	0.001	0.002	0.003	0.007	0.019	0.024	0.025	0.023	277.759	0.823	0.4619110	3.430472	0.1560711E-04	2.342031
12252011	05	0.007	0.004	0.026	0.000	0.002	0.003	0.007	0.020	0.025	0.025	0.022	277.968	0.822	NaN	3.999468	0.1832933E-01	-0.6611445
12252011	06	0.007	0.005	0.029	0.000	0.002	0.004	0.008	0.020	0.027	0.027	0.022	278.587	0.811	NaN	3.940809	0.2138602E-01	-0.7345446
12252011	07	0.007	0.008	0.039	0.000	0.002	0.004	0.008	0.020	0.030	0.031	0.022	279.305	0.795	NaN	3.981709	0.3255517E-01	-0.9125506
12252011	08	0.006	0.012	0.049	0.001	0.002	0.003	0.008	0.020	0.034	0.034	0.023	279.675	0.806	0.3979100	4.019989	0.2270504E-04	2.248103
12252011	09	0.006	0.015	0.048	0.001	0.002	0.003	0.008	0.019	0.040	0.040	0.023	280.008	0.836	0.4516748	6.109053	0.4160967E-04	2.166780
12252011	10	0.004	0.023	0.048	0.001	0.002	0.003	0.007	0.017	0.043	0.042	0.023	280.460	0.867	0.4685037	8.933919	0.7949906E-04	2.050680
12252011	11	0.003	0.035	0.054	0.001	0.002	0.002	0.006	0.014	0.044	0.038	0.023	280.829	0.907	0.4196292	13.86001	0.2174818E-03	1.804341
12252011	12	0.002	0.032	0.053	0.001	0.002	0.002	0.006	0.013	0.045	0.034	0.024	281.236	0.939	0.4155437	21.67984	0.4794749E-03	1.655290
12252011	13	0.001	0.020	0.053	0.000	0.001	0.002	0.005	0.011	0.040	0.017	0.028	281.730	0.952	NaN	20.28222	0.4358766E-01	-0.3322480
12252011	14	0.000	0.013	0.055	0.000	0.001	0.002	0.005	0.011	0.039	0.009	0.033	281.641	0.972	0.1688684	35.82278	0.1105829E-01	0.5104714
12252011	15	0.000	0.008	0.054	0.000	0.001	0.002	0.005	0.011	0.040	0.007	0.039	281.458	0.980	0.1831313	47.28375	0.1358069E-01	0.5417902
12252011	16	0.000	0.006	0.053	0.000	0.002	0.002	0.005	0.012	0.042	0.006	0.044	281.207	0.982	0.1950191	53.84391	0.1590255E-01	0.5296698
12252011	17	0.000	0.007	0.051	0.000	0.002	0.002	0.006	0.013	0.043	0.006	0.050	280.835	0.988	0.3647887	127.5562	0.2940441E-01	0.6372893
12252011	18	0.000	0.007	0.050	0.000	0.002	0.002	0.006	0.014	0.044	0.005	0.057	280.530	0.990	0.3893235	148.9848	0.3558900E-01	0.6218262
12252011	19	0.000	0.002	0.050	0.000	0.003	0.003	0.006	0.015	0.045	0.005	0.064	280.400	0.990	0.4130660	168.1201	0.4102935E-01	0.6125249
12252011	20	0.000	0.001	0.046	0.000	0.003	0.003	0.006	0.015	0.045	0.005	0.065	280.212	0.987	0.4259343	171.6915	0.4115434E-01	0.6203331
12252011	21	0.000	0.001	0.042	0.000	0.003	0.003	0.006	0.015	0.043	0.005	0.063	279.979	0.968	0.1431568	52.19246	0.2269954E-01	0.3615908
12252011	22	0.000	0.001	0.038	0.000	0.003	0.002	0.005	0.013	0.039	0.004	0.056	279.695	0.945	0.6425411E-01	27.85310	0.1689234E-01	0.2171836
12252011	23	0.000	0.002	0.036	0.000	0.003	0.002	0.004	0.011	0.033	0.003	0.046	279.340	0.929	0.3491467E-01	16.14655	0.1180294E-01	0.1360895
12252011	24	0.000	0.003	0.032	0.000	0.002	0.002	0.004	0.009	0.030	0.002	0.035	278.627	0.925	0.4658866E-01	11.62441	0.6568115E-02	0.2479300
12262011	01	0.001	0.003	0.020	0.000	0.002	0.002	0.004	0.009	0.033	0.001	0.029	277.854	0.922	0.1502921	11.31891	0.3540061E-02	0.5047939
12262011	02	0.002	0.003	0.009	0.001	0.002	0.002	0.004	0.009	0.036	0.013	0.025	277.223	0.939	0.6246980	14.73495	0.1668162E-03	1.946110
12262011	03	0.002	0.004	0.011	0.002	0.002	0.002	0.004	0.009	0.039	0.025	0.021	276.759	0.952	0.6895660	21.71661	0.2550818E-03	1.930113
12262011	04	0.002	0.006	0.018	0.002	0.002	0.002	0.005	0.010	0.041	0.034	0.019	276.866	0.922	0.6369250	14.44616	0.1558490E-03	1.967048
12262011	05	0.001	0.010	0.027	0.002	0.002	0.002	0.005	0.010	0.039	0.036	0.017	276.533	0.943	0.5685956	19.76809	0.3965896E-03	1.697623
12262011	06	0.001	0.014	0.032	0.002	0.002	0.002	0.004	0.009	0.036	0.033	0.015	276.151	0.968	0.5568334	39.63905	0.1666035E-02	1.376439
12262011	07	0.001	0.018	0.031	0.002	0.001	0.001	0.004	0.008	0.034	0.030	0.013	275.736	0.983	0.5727642	55.44120	0.3090475E-02	1.253807
12262011	08	0.001	0.015	0.023	0.002	0.001	0.001	0.004	0.007	0.035	0.031	0.013	275.475	0.968	0.5857100	36.19902	0.1299558E-02	1.444901
12262011	09	0.002	0.011	0.017	0.003	0.001	0.001	0.004	0.007	0.038	0.034	0.013	276.568	0.908	0.6130291	11.22116	0.1112773E-03	2.003631
12262011	10	0.005	0.013	0.019	0.003	0.001	0.001	0.004	0.007	0.033	0.028	0.013	278.488	0.813	0.5006955	3.725719	0.1634586E-04	2.357802
12262011	11	0.008	0.016	0.022	0.002	0.001	0.001	0.004	0.006	0.019	0.015	0.012	279.954	0.747	0.2854850	1.663499	0.8590420E-05	2.287008
12262011	12	0.010	0.014	0.023	0.001	0.001	0.001	0.003	0.005	0.010	0.008	0.010	281.277	0.683	0.1275703	0.7875385	0.6530691E-05	2.081313
12262011	13	0.013	0.012	0.026	0.001	0.001	0.001	0.003	0.005	0.009	0.007	0.009	282.331	0.628	0.1033326	0.5419615	0.2840203E-05	2.280619
12262011	14	0.014	0.014	0.033	0.001	0.001	0.001	0.002	0.004	0.009	0.007	0.008	282.910	0.592	0.7494396E-01	0.4759801	0.4019723E-05	2.073393
12262011	15	0.017	0.018	0.039	0.001	0.001	0.001	0.002	0.005	0.011	0.008	0.009	283.126	0.548	0.7930958E-01	0.4378926	0.3067190E-05	2.154627
12262011	16	0.019	0.022	0.039	0.001	0.001	0.001	0.003	0.006	0.012	0.008	0.011	282.824	0.521	0.9150898E-01	0.4559596	0.3433858E-05	2.123144
12262011	17	0.018	0.023	0.033	0.001	0.001	0.001	0.003	0.006	0.012	0.007	0.013	282.443	0.507	0.9140271E-01	0.5572770	0.9480651E-05	1.769233
12262011	18	0.016	0.018	0.026	0.001	0.001	0.001	0.003	0.008	0.010	0.005	0.014	282.293	0.493	0.7419884E-01	0.4310576	0.7688986E-05	1.748666
12262011	19	0.014	0.017	0.027	0.002	0.001	0.002	0.003	0.008	0.010	0.005	0.015	282.343	0.482	0.8144575E-01	0.5398148	0.8283839E-05	1.814013
12262011	20	0.012	0.019	0.026	0.002	0.002	0.002	0.003	0.008	0.011	0.005	0.016	282.281	0.495	0.8886766E-01	0.6600559	0.1254969E-04	1.720948
12262011	21	0.009	0.025	0.024	0.003	0.002	0.001	0.003	0.007	0.011	0.004	0.015	282.021	0.538	0.6322479E-01	0.6554652	0.2609921E-04	1.399922
12262011	22	0.007	0.036	0.023	0.004	0.002	0.001	0.003	0.007	0.012	0.004	0.015	281.698	0.592	0.7085097E-01	0.7707146	0.2803998E-04	1.439116
12262011	23	0.006	0.041	0.020	0.004	0.002	0.001	0.003	0.007	0.014	0.004	0.016	281.338	0.652	0.8665073E-01	1.039498	0.3861858E-04	1.430028
12262011	24	0.006	0.039	0.017	0.005	0.002	0.001	0.004	0.007	0.015	0.004	0.017	281.107	0.712	0.1158270	1.406664	0.4131327E-04	1.532101
12272011	01	0.003	0.031	0.015	0.005	0.002	0.001	0.004	0.007	0.019	0.003	0.018	280.962	0.770	0.1356567	1.920150	0.5587823E-04	1.536093
12272011	02	0.001	0.023	0.014	0.005	0.002	0.001	0.004	0.007	0.021	0.002	0.019	280.500	0.874	0.2473593E-04	6.130878	0.1253616E-02	0.6893582
12272011	03	0.000	0.011	0.006	0.001	0.001	0.000	0.001	0.003	0.010	0.000	0.011	280.239	0.940	0.000000	4.244946	0.1757336E-02	0.3830173
12272011	04	0.001	0.008	0.003	0.000	0.000	0.000	0.000	0.001	0.004	0.000	0.003	280.419	0.950	NaN	1.838034	0.1315554E-02	0.1452450
12272011	05	0.001	0.006	0.002	0.000	0.000	0.000	0.000	0.000	0.001	0.000	0.001	280.667	0.954	0.3883898E-02	0.6622517	0.1206092E-03	0.7396427
12272011	06	0.001	0.003	0.002	0.000	0.000	0.000	0.000	0.000	0.001	0.000	0.001	280.986	0.956	0.5191028E-02	0.8403361	0.1198368E-03	0.8458630
12272011	07	0.004	0.002	0.002	0.000	0.000	0.000	0.000	0.000	0.001	0.000	0.001	281.360	0.955	0.4378784E-01	0.8786837	0.1262903E-04	1.842463
12272011	08	0.008	0.002	0.002	0.000	0.000	0.000	0.000	0.000	0.000	0.000	0.000	281.594	0.943	0.000000	0.1000000E-10	0.1343851E-15	1.871649
12272011	09	0.007	0.002	0.003	0.000	0.001	0.000	0.001	0.000	0.001	0.000	0.001	281.454	0.922	NaN	1.357909	0.8284978E-05	2.214579
12272011	10	0.002	0.004	0.006	0.001	0.001	0.000	0.001	0.001	0.007	0.000	0.005	281.066	0.900	0.5779725E-01	1.374528	0.4615332E-04	1.473951
12272011	11	0.001	0.003	0.007	0.000	0.001	0.000	0.001	0.001	0.010	0.000	0.007	280.747	0.874	0.4936773E-01	2.045179	0.9413924E-03	0.3369607
12272011	12	0.002	0.003	0.007	0.000	0.001	0.000	0.001	0.000	0.008	0.000	0.005	280.477	0.850	NaN	1.406875	0.4187933E-02	-0.4737443
12272011	13	0.003	0.003	0.008	0.001	0.002	0.000	0.001	0.001	0.005	0.001	0.005	280.214	0.819	0.4195619E-01	0.8114145	0.4366709E-04	1.269089
12272011	14	0.003	0.003	0.008	0.001	0.002	0.000	0.001	0.001	0.005	0.000	0.005	280.642	0.774	0.3038633E-01	0.6395634	0.4682897E-04	1.135369
12272011	15	0.001	0.004	0.009	0.001	0.002	0.000	0.000	0.001	0.006	0.000	0.005	279.960	0.766	0.1614666E-01	0.6352935	0.1147584E-03	0.7431898
12272011	16	0.001	0.003	0.009	0.001	0.001	0.000	0.000	0.001	0.008	0.000	0.006	279.664	0.761	0.1000762E-03	0.7403567	0.5391442E-03	0.1377361
12272011	17	0.000	0.003	0.010	0.001	0.001	0.000	0.001	0.001	0.011	0.000	0.009	279.372	0.759	0.000000	1.082445	0.2526062E-02	-0.3680380
12272011	18	0.000	0.004	0.014	0.001	0.001	0.001	0.001	0.003	0.014	0.000	0.015	279.250	0.763	0.000000	1.687565	0.4589525E-02	-0.4345071
12272011	19	0.000	0.005	0.021	0.001	0.002	0.001	0.002	0.006	0.017	0.001	0.022	279.175	0.762	0.000000	2.269546	0.6958925E-02	-0.4866031
12272011	20	0.000	0.005	0.023	0.001	0.002	0.001	0.003	0.007	0.021	0.001	0.025	279.004	0.756	0.000000	2.483316	0.6091802E-02	-0.3897137
12272011	21	0.000	0.003	0.016	0.002	0.002	0.001	0.003	0.006	0.020	0.002	0.022	278.942	0.758	0.000000	2.235583	0.3729018E-02	-0.2222037
12272011	22	0.000	0.001	0.011	0.003	0.002	0.001	0.002	0.005	0.017	0.003	0.018	278.858	0.758	0.000000	1.866526	0.2320455E-02	-0.9453923E-01
12272011	23	0.000	0.001	0.008	0.004	0.002	0.001	0.002	0.004	0.016	0.003	0.017	278.131	0.759	0.000000	1.839557	0.3058066E-02	-0.2207335
12272011	24	0.000	0.001	0.007	0.004	0.003	0.001	0.002	0.003	0.016	0.003	0.016	277.949	0.744	0.000000	1.746161	0.2429117E-02	-0.1433641
12282011	01	0.000	0.001	0.007	0.004	0.003	0.001	0.002	0.003	0.017	0.003	0.016	277.844	0.738	0.000000	1.774233	0.1730935E-02	0.1072988E-01
12282011	02	0.000	0.002	0.007	0.004	0.003	0.001	0.002	0.003	0.018	0.003	0.016	277.521	0.744	0.000000	1.802304	0.1125824E-02	0.2043575
12282011	03	0.001	0.002	0.008	0.004	0.004	0.001	0.002	0.003	0.019	0.003	0.016	277.054	0.753	0.6030202E-03	2.468579	0.7856207E-03	0.4972341
12282011	04	0.001	0.003	0.009	0.004	0.004	0.001	0.002	0.004	0.018	0.003	0.015	276.501	0.764	0.1021147E-02	3.138709	0.8717103E-03	0.5563788
12282011	05	0.001	0.005	0.009	0.004	0.005	0.001	0.002	0.004	0.017	0.004	0.015	275.895	0.778	0.2082805	2.097914	0.8380773E-04	1.398504
12282011	06	0.002	0.005	0.008	0.003	0.005	0.001	0.002	0.004	0.016	0.006	0.015	275.234	0.793	0.2201928	2.212831	0.9051412E-04	1.388232
12282011	07	0.003	0.005	0.009	0.003	0.006	0.001	0.002	0.004	0.017	0.007	0.014	274.566	0.806	0.4116977	2.693601	0.4079793E-04	1.819695
12282011	08	0.003	0.005	0.008	0.004	0.006	0.001	0.002	0.004	0.018	0.009	0.014	274.272	0.788	0.4247134	2.534546	0.3629499E-04	1.844054
12282011	09	0.004	0.005	0.008	0.004	0.006	0.001	0.003	0.004	0.018	0.010	0.014	275.465	0.733	0.4098912	1.971507	0.2261117E-04	1.940475
12282011	10	0.004	0.011	0.017	0.002	0.006	0.001	0.002	0.004	0.016	0.009	0.014	277.642	0.650	0.2021471	1.371310	0.3566227E-04	1.584927
12282011	11	0.003	0.021	0.027	0.001	0.006	0.001	0.002	0.003	0.013	0.006	0.013	279.497	0.576	0.7941222E-01	1.022354	0.6636670E-04	1.187651
12282011	12	0.003	0.020	0.027	0.001	0.005	0.001	0.002	0.003	0.011	0.004	0.012	281.299	0.501	0.3952873E-01	0.7085016	0.6978034E-04	1.006608
12282011	13	0.003	0.017	0.026	0.001	0.004	0.001	0.002	0.003	0.009	0.002	0.011	282.801	0.442	0.1820683E-01	0.5205664	0.8220420E-04	0.8015822
12282011	14	0.004	0.016	0.027	0.000	0.004	0.001	0.001	0.003	0.008	0.002	0.010	283.332	0.424	NaN	0.5263924	0.2399311E-01	-1.658777
12282011	15	0.004	0.015	0.028	0.000	0.004	0.001	0.001	0.003	0.008	0.002	0.010	282.785	0.441	NaN	0.5591670	0.2499306E-01	-1.650278
12282011	16	0.004	0.014	0.026	0.000	0.004	0.001	0.001	0.003	0.008	0.001	0.009	281.737	0.477	NaN	0.6084850	0.1998064E-01	-1.516360
12282011	17	0.004	0.014	0.024	0.000	0.003	0.001	0.001	0.003	0.007	0.002	0.009	280.284	0.524	NaN	0.6216869	0.2098515E-01	-1.528340
12282011	18	0.005	0.014	0.020	0.000	0.003	0.001	0.001	0.003	0.007	0.002	0.009	278.888	0.580	NaN	0.7763537	0.1593561E-01	-1.312309
12282011	19	0.007	0.012	0.015	0.000	0.003	0.001	0.002	0.004	0.005	0.004	0.009	277.681	0.660	NaN	1.017478	0.9674162E-02	-0.9780884
12282011	20	0.008	0.010	0.011	0.000	0.003	0.001	0.002	0.005	0.004	0.004	0.009	276.792	0.718	NaN	1.273030	0.3419249E-02	-0.4290921
12282011	21	0.006	0.009	0.009	0.001	0.003	0.001	0.002	0.005	0.004	0.005	0.009	276.047	0.751	0.2754754	0.9366266	0.5838924E-05	2.205234
12282011	22	0.006	0.008	0.008	0.001	0.003	0.001	0.003	0.006	0.005	0.005	0.009	275.327	0.777	0.3556551	0.9121391	0.3385818E-05	2.430397
12282011	23	0.005	0.007	0.008	0.000	0.003	0.001	0.003	0.006	0.005	0.005	0.009	274.637	0.797	NaN	1.523322	0.2466206E-02	-0.2092375
12282011	24	0.004	0.007	0.009	0.000	0.003	0.001	0.003	0.006	0.006	0.006	0.009	273.935	0.820	NaN	1.723112	0.4347196E-02	-0.4018958
12292011	01	0.002	0.007	0.012	0.001	0.003	0.001	0.003	0.006	0.008	0.008	0.009	273.305	0.840	0.3715952	1.667055	0.1131346E-04	2.168354
12292011	02	0.001	0.007	0.015	0.001	0.003	0.001	0.002	0.005	0.010	0.009	0.010	272.666	0.864	0.2872136	2.345395	0.4255021E-04	1.741314
12292011	03	0.001	0.006	0.016	0.001	0.003	0.001	0.002	0.005	0.011	0.010	0.010	272.306	0.872	0.3084592	2.731471	0.5124302E-04	1.726762
12292011	04	0.001	0.006	0.017	0.001	0.003	0.001	0.002	0.005	0.012	0.010	0.010	272.025	0.876	0.3366909	3.182723	0.5990387E-04	1.725344
12292011	05	0.001	0.005	0.020	0.001	0.003	0.001	0.002	0.005	0.013	0.011	0.010	271.767	0.879	0.3298659	3.396850	0.7161521E-04	1.676071
12292011	06	0.001	0.006	0.024	0.001	0.003	0.001	0.002	0.005	0.014	0.012	0.010	271.481	0.882	0.3161446	3.611663	0.8833205E-04	1.611589
12292011	07	0.000	0.007	0.034	0.001	0.003	0.001	0.003	0.006	0.016	0.015	0.011	271.206	0.885	0.2802739	4.449048	0.1518379E-03	1.466887
12292011	08	0.000	0.009	0.040	0.001	0.004	0.001	0.003	0.007	0.018	0.018	0.011	271.593	0.856	0.3008199	3.762982	0.9401264E-04	1.602346
12292011	09	0.001	0.010	0.038	0.001	0.004	0.002	0.004	0.008	0.021	0.021	0.012	273.405	0.783	0.3430077	2.433063	0.2588977E-04	1.973025
12292011	10	0.004	0.011	0.040	0.000	0.004	0.002	0.004	0.009	0.020	0.021	0.013	276.853	0.663	NaN	1.531733	0.3696032E-01	-1.382553
12292011	11	0.009	0.019	0.062	0.000	0.004	0.002	0.004	0.008	0.011	0.011	0.014	280.490	0.555	NaN	1.155866	0.5299013E-01	-1.661287
12292011	12	0.005	0.032	0.059	0.000	0.004	0.001	0.003	0.007	0.011	0.005	0.015	283.083	0.483	NaN	0.7256367	0.5499977E-01	-1.879642
12292011	13	0.004	0.045	0.047	0.001	0.003	0.001	0.003	0.007	0.011	0.004	0.015	285.016	0.418	0.7426739E-04	1.159836	0.1445413E-02	-0.9559529E-01
12292011	14	0.007	0.047	0.040	0.001	0.003	0.001	0.003	0.006	0.009	0.004	0.014	285.957	0.388	0.1267946E-01	0.4194472	0.5273065E-04	0.9006142
12292011	15	0.008	0.052	0.038	0.001	0.003	0.001	0.003	0.006	0.010	0.003	0.014	285.453	0.393	0.1801807E-01	0.4217077	0.3960551E-04	1.027256
12292011	16	0.008	0.054	0.035	0.001	0.003	0.001	0.003	0.006	0.011	0.003	0.014	284.346	0.411	0.2765793E-01	0.4505408	0.3160023E-04	1.154044
12292011	17	0.008	0.053	0.029	0.000	0.003	0.001	0.003	0.006	0.011	0.003	0.014	282.740	0.438	NaN	0.6472023	0.2096498E-01	-1.510454
12292011	18	0.011	0.050	0.019	0.000	0.003	0.001	0.003	0.007	0.008	0.003	0.014	280.904	0.484	NaN	0.7251332	0.8791725E-02	-1.083656
12292011	19	0.016	0.046	0.010	0.001	0.003	0.002	0.004	0.009	0.004	0.004	0.014	279.422	0.531	0.2478636	0.4988233	0.1412067E-05	2.548091
12292011	20	0.016	0.041	0.007	0.001	0.003	0.002	0.004	0.010	0.003	0.003	0.014	278.520	0.549	0.2509150	0.3683442	0.1101708E-05	2.524188
12292011	21	0.015	0.037	0.007	0.001	0.003	0.002	0.005	0.011	0.002	0.002	0.014	277.457	0.616	0.2149857	0.2738603	0.5131481E-06	2.727286
12292011	22	0.013	0.033	0.006	0.001	0.003	0.002	0.006	0.013	0.001	0.002	0.014	276.742	0.665	0.9651828E-01	0.1154509	0.1369057E-06	2.925976
12292011	23	0.011	0.029	0.006	0.001	0.004	0.003	0.006	0.014	0.001	0.003	0.014	276.249	0.694	0.3910065E-04	0.1948569E-04	0.2562221E-10	2.881099
12292011	24	0.008	0.026	0.006	0.001	0.004	0.003	0.007	0.015	0.002	0.006	0.014	275.737	0.732	0.4271625	0.4415075	0.2809663E-06	3.196284
12302011	01	0.006	0.025	0.008	0.001	0.004	0.003	0.007	0.015	0.003	0.007	0.014	275.243	0.771	0.3971194	0.6049569	0.7555770E-06	2.903446
12302011	02	0.005	0.024	0.008	0.001	0.004	0.003	0.006	0.015	0.004	0.008	0.014	274.967	0.793	0.4064595	0.7287713	0.1186339E-05	2.788382
12302011	03	0.005	0.023	0.011	0.001	0.004	0.003	0.006	0.015	0.004	0.006	0.014	274.853	0.809	0.4142714	0.8821496	0.1849444E-05	2.678501
12302011	04	0.005	0.023	0.010	0.001	0.004	0.003	0.007	0.015	0.005	0.006	0.014	274.848	0.826	0.4672306	1.072247	0.2366661E-05	2.656159
12302011	05	0.006	0.023	0.009	0.001	0.004	0.003	0.007	0.015	0.006	0.007	0.014	274.919	0.832	0.5104902	1.163562	0.2349886E-05	2.694743
12302011	06	0.009	0.023	0.006	0.001	0.004	0.003	0.007	0.017	0.006	0.010	0.015	275.080	0.842	0.5802358	1.415136	0.2690956E-05	2.720892
12302011	07	0.016	0.022	0.002	0.002	0.004	0.004	0.009	0.021	0.004	0.018	0.016	275.288	0.852	NaN	4.372242	0.1523568E-09	7.457842
12302011	08	0.017	0.013	0.000	0.004	0.005	0.005	0.011	0.027	0.002	0.026	0.017	275.772	0.855	NaN	5.973139	0.2134331E-09	7.446941
12302011	09	0.015	0.007	0.000	0.005	0.005	0.005	0.012	0.031	0.002	0.032	0.018	277.219	0.856	NaN	7.260188	0.2781335E-09	7.416695
12302011	10	0.014	0.004	0.000	0.007	0.005	0.005	0.012	0.029	0.002	0.039	0.018	280.549	0.808	NaN	6.777634	0.2945118E-09	7.361975
12302011	11	0.012	0.006	0.016	0.003	0.004	0.004	0.009	0.021	0.005	0.017	0.019	284.434	0.710	0.1462742	0.3833568	0.3337894E-06	3.060131
12302011	12	0.003	0.017	0.027	0.001	0.002	0.002	0.005	0.011	0.017	0.004	0.020	286.877	0.631	0.4393744E-01	0.9694733	0.2021736E-04	1.680811
12302011	13	0.001	0.024	0.034	0.001	0.002	0.001	0.003	0.006	0.018	0.003	0.019	288.837	0.565	0.2497435E-04	1.026209	0.1344383E-02	-0.1172873
12302011	14	0.000	0.015	0.033	0.001	0.001	0.001	0.002	0.005	0.017	0.002	0.018	289.688	0.542	0.000000	0.8431618	0.3589249E-02	-0.6290928
12302011	15	0.000	0.010	0.031	0.001	0.001	0.001	0.002	0.004	0.015	0.002	0.016	289.399	0.551	0.000000	0.7971922	0.3492092E-02	-0.6415226
12302011	16	0.001	0.008	0.027	0.001	0.001	0.001	0.002	0.005	0.015	0.001	0.015	288.749	0.567	0.3027916E-04	0.9816347	0.1340323E-02	-0.1352597
12302011	17	0.006	0.007	0.019	0.001	0.001	0.001	0.002	0.006	0.013	0.001	0.015	287.360	0.622	0.1984835E-03	1.953884	0.1751670E-02	0.4744642E-01
12302011	18	0.015	0.004	0.010	0.001	0.002	0.002	0.003	0.009	0.003	0.001	0.014	285.473	0.665	0.1138279	0.7122416	0.2465173E-05	2.460780
12302011	19	0.013	0.002	0.006	0.002	0.002	0.002	0.005	0.013	0.001	0.001	0.014	284.359	0.703	0.2971750E-01	0.1040698	0.1055281E-06	2.993957
12302011	20	0.017	0.003	0.006	0.002	0.002	0.003	0.005	0.014	0.001	0.001	0.014	278.520	0.549	0.5960464E-07	0.2147804E-07	0.7005097E-18	7.486580
12302011	21	0.018	0.004	0.006	0.002	0.002	0.003	0.006	0.015	0.001	0.001	0.014	277.457	0.616	0.2664328E-04	0.7670750E-05	0.4774595E-11	3.205901
12302011	22	0.017	0.005	0.005	0.001	0.002	0.003	0.006	0.017	0.001	0.002	0.014	276.742	0.665	0.3450444	0.1651681	0.3882275E-07	3.628840
12302011	23	0.017	0.005	0.001	0.003	0.002	0.003	0.007	0.018	0.001	0.009	0.014	276.249	0.694	0.2969384	0.2185741	0.9483713E-07	3.362620
12302011	24	0.014	0.006	0.000	0.004	0.002	0.003	0.007	0.019	0.001	0.017	0.014	275.737	0.732	NaN	2.575515	0.8500889E-10	7.481400
