# Supplementary material for: Understanding nitrate formation in a world with less sulfate
Source: Copernicus journal article supplement (doi:10.5194/acp-18-12765-2018), 2018-09-05
Supplement: Supplementary file 2 [file acp-18-12765-2018-supplement.zip › DATA/RAW DATA FOR DIURNALS/data_extract_YRK_jul_mod.csv]

Date	Hour	NH3	SO2	HNO3	CL	NA	MG	K	CA	NH4	NO3	SO4	T	RH	e_NO3	Water	H+	pH
07022011	01	0.096	0.022	0.013	0.002	0.001	0.001	0.003	0.004	0.053	0.003	0.031	295.031	0.840	0.2257695	6.206766	0.4117403E-04	2.178242
07022011	02	0.085	0.026	0.013	0.002	0.001	0.001	0.003	0.004	0.058	0.004	0.032	294.560	0.875	0.3133071	8.782939	0.4242674E-04	2.316000
07022011	03	0.072	0.030	0.015	0.002	0.001	0.001	0.003	0.004	0.064	0.006	0.034	294.348	0.882	0.3091591	9.551063	0.5246433E-04	2.260188
07022011	04	0.060	0.037	0.017	0.002	0.001	0.001	0.003	0.003	0.069	0.006	0.036	294.207	0.882	0.2918963	10.40098	0.7030734E-04	2.170074
07022011	05	0.049	0.045	0.020	0.002	0.001	0.001	0.003	0.003	0.073	0.006	0.038	294.096	0.882	0.2671689	10.97475	0.9097421E-04	2.081476
07022011	06	0.039	0.051	0.023	0.001	0.001	0.001	0.003	0.003	0.076	0.006	0.040	294.094	0.885	0.2516619	12.58418	0.1218655E-03	2.013944
07022011	07	0.034	0.050	0.032	0.001	0.001	0.001	0.003	0.002	0.078	0.008	0.040	295.355	0.893	0.1847859	12.86689	0.1591508E-03	1.907665
07022011	08	0.043	0.042	0.047	0.001	0.001	0.001	0.003	0.002	0.080	0.009	0.040	297.707	0.831	0.9029132E-01	8.160593	0.1557380E-03	1.719327
07022011	09	0.026	0.073	0.071	0.000	0.000	0.001	0.001	0.001	0.077	0.003	0.040	299.242	0.774	NaN	8.201380	0.3496255E-01	-0.6297162
07022011	10	0.029	0.093	0.072	0.000	0.000	0.000	0.001	0.001	0.072	0.002	0.037	301.062	0.701	NaN	5.868111	0.3522915E-01	-0.7784039
07022011	11	0.027	0.137	0.074	0.000	0.000	0.000	0.001	0.001	0.077	0.001	0.040	303.143	0.608	NaN	4.413933	0.4025932E-01	-0.9600406
07022011	12	0.016	0.168	0.062	0.000	0.000	0.000	0.001	0.001	0.082	0.001	0.042	304.626	0.542	NaN	3.383637	0.3932902E-01	-1.065329
07022011	13	0.031	0.111	0.044	0.000	0.000	0.000	0.001	0.001	0.079	0.001	0.041	305.168	0.514	NaN	3.312331	0.9198847E-02	-0.4435996
07022011	14	0.060	0.065	0.032	0.000	0.000	0.000	0.000	0.001	0.077	0.000	0.040	305.698	0.490	NaN	3.083401	0.3983283E-03	0.8887888
07022011	15	0.122	0.034	0.023	0.000	0.000	0.000	0.000	0.001	0.076	0.000	0.039	305.422	0.486	NaN	2.847769	0.1265374E-03	1.352286
07022011	16	0.210	0.012	0.015	0.000	0.000	0.000	0.001	0.001	0.069	0.000	0.036	305.015	0.508	NaN	2.637383	0.6603502E-04	1.601399
07022011	17	0.229	0.007	0.011	0.000	0.000	0.000	0.001	0.001	0.062	0.000	0.033	304.588	0.514	NaN	2.347185	0.5746140E-04	1.611171
07022011	18	0.221	0.006	0.009	0.000	0.000	0.000	0.001	0.002	0.058	0.000	0.032	304.076	0.503	NaN	2.102541	0.5639999E-04	1.571465
07022011	19	0.205	0.005	0.008	0.000	0.000	0.001	0.002	0.003	0.057	0.000	0.033	302.526	0.543	NaN	2.391231	0.4927379E-04	1.686006
07022011	20	0.156	0.006	0.007	0.001	0.001	0.001	0.002	0.004	0.059	0.000	0.035	300.176	0.626	0.4655361E-01	2.956521	0.6532003E-04	1.655735
07022011	21	0.100	0.005	0.006	0.001	0.001	0.001	0.002	0.004	0.061	0.000	0.036	298.770	0.662	0.5656582E-01	3.339664	0.8859452E-04	1.576296
07022011	22	0.073	0.006	0.006	0.002	0.001	0.001	0.002	0.004	0.062	0.001	0.036	297.616	0.701	0.5595779E-01	3.796931	0.1074607E-03	1.548183
07022011	23	0.060	0.007	0.006	0.002	0.001	0.001	0.003	0.004	0.059	0.001	0.036	296.812	0.750	0.6872755E-01	4.514385	0.1143342E-03	1.596423
07022011	24	0.056	0.011	0.006	0.002	0.001	0.001	0.003	0.005	0.053	0.001	0.034	296.093	0.802	0.8953214E-01	5.048182	0.9461819E-04	1.727160
07032011	01	0.051	0.018	0.005	0.002	0.001	0.001	0.003	0.006	0.045	0.001	0.032	295.449	0.858	0.1236466	6.303411	0.7951949E-04	1.899102
07032011	02	0.048	0.026	0.004	0.002	0.001	0.001	0.004	0.008	0.039	0.001	0.030	295.036	0.887	0.1563103	6.714343	0.5556715E-04	2.082186
07032011	03	0.045	0.032	0.004	0.002	0.001	0.002	0.005	0.009	0.035	0.001	0.030	294.793	0.898	0.1789629	7.050055	0.4539623E-04	2.191173
07032011	04	0.041	0.035	0.003	0.002	0.001	0.002	0.005	0.009	0.033	0.002	0.030	294.606	0.905	0.1866112	7.810666	0.5037445E-04	2.190478
07032011	05	0.038	0.037	0.004	0.002	0.001	0.002	0.005	0.009	0.033	0.002	0.030	294.581	0.894	0.1397271	6.414749	0.5612940E-04	2.057989
07032011	06	0.037	0.038	0.004	0.002	0.001	0.002	0.005	0.009	0.035	0.002	0.031	294.530	0.909	0.1792456	8.201181	0.5956757E-04	2.138866
07032011	07	0.045	0.041	0.008	0.002	0.001	0.002	0.005	0.009	0.038	0.003	0.031	295.952	0.892	0.1363854	6.856593	0.5385248E-04	2.104903
07032011	08	0.061	0.042	0.015	0.002	0.001	0.002	0.005	0.008	0.044	0.004	0.032	297.920	0.838	0.8417481E-01	5.283814	0.5566741E-04	1.977347
07032011	09	0.028	0.078	0.019	0.000	0.001	0.001	0.002	0.003	0.065	0.001	0.037	299.489	0.774	NaN	6.674634	0.6385897E-03	1.019206
07032011	10	0.036	0.084	0.022	0.000	0.000	0.000	0.002	0.002	0.072	0.001	0.040	301.454	0.688	NaN	5.392155	0.7941597E-03	0.8318545
07032011	11	0.044	0.120	0.028	0.000	0.000	0.000	0.001	0.002	0.078	0.001	0.042	303.580	0.587	NaN	4.230127	0.7359322E-03	0.7595156
07032011	12	0.055	0.119	0.030	0.000	0.000	0.000	0.001	0.002	0.078	0.001	0.042	305.107	0.521	NaN	3.426935	0.4760870E-03	0.8572195
07032011	13	0.086	0.080	0.026	0.000	0.000	0.000	0.001	0.002	0.068	0.000	0.037	306.507	0.470	NaN	2.519325	0.1729167E-03	1.163447
07032011	14	0.119	0.034	0.018	0.000	0.000	0.000	0.001	0.002	0.071	0.000	0.038	305.850	0.481	NaN	2.513507	0.1268844E-03	1.296872
07032011	15	0.211	0.009	0.011	0.000	0.000	0.000	0.001	0.001	0.065	0.000	0.035	305.012	0.514	NaN	2.478911	0.6993578E-04	1.549562
07032011	16	0.242	0.004	0.009	0.000	0.000	0.000	0.001	0.001	0.056	0.000	0.030	304.086	0.546	NaN	2.379614	0.4839074E-04	1.691744
07032011	17	0.237	0.003	0.008	0.000	0.000	0.000	0.001	0.001	0.048	0.000	0.026	303.519	0.551	NaN	2.055231	0.4050938E-04	1.705305
07032011	18	0.234	0.003	0.008	0.000	0.000	0.000	0.001	0.001	0.042	0.000	0.023	302.482	0.572	NaN	1.951687	0.3234533E-04	1.780599
07032011	19	0.200	0.004	0.008	0.000	0.000	0.000	0.001	0.002	0.038	0.000	0.022	300.813	0.685	NaN	2.668540	0.2901721E-04	1.963618
07032011	20	0.121	0.006	0.008	0.001	0.000	0.001	0.002	0.004	0.037	0.000	0.024	299.531	0.699	0.3742927E-01	2.379718	0.4395678E-04	1.733500
07032011	21	0.091	0.009	0.008	0.001	0.001	0.001	0.003	0.005	0.039	0.000	0.026	298.576	0.722	0.4697400E-01	2.678216	0.4987235E-04	1.729986
07032011	22	0.059	0.008	0.008	0.001	0.001	0.001	0.003	0.004	0.043	0.001	0.028	297.807	0.748	0.4214406E-01	3.394073	0.8697169E-04	1.591343
07032011	23	0.030	0.005	0.007	0.001	0.001	0.001	0.002	0.003	0.045	0.001	0.027	297.238	0.777	0.3766125E-01	3.812864	0.1222491E-03	1.494006
07032011	24	0.020	0.003	0.005	0.001	0.000	0.000	0.002	0.002	0.042	0.000	0.024	296.704	0.817	0.5111468E-01	4.136978	0.1053960E-03	1.593859
07042011	01	0.024	0.003	0.004	0.001	0.000	0.000	0.001	0.001	0.035	0.000	0.020	296.361	0.846	0.5648124E-01	4.239104	0.9016389E-04	1.672241
07042011	02	0.026	0.003	0.004	0.001	0.000	0.000	0.001	0.001	0.030	0.000	0.017	296.167	0.859	0.5039424E-01	3.807043	0.7830164E-04	1.686817
07042011	03	0.024	0.003	0.004	0.000	0.000	0.000	0.001	0.001	0.027	0.000	0.015	296.061	0.863	NaN	3.912962	0.1198948E-03	1.513705
07042011	04	0.021	0.004	0.004	0.000	0.000	0.000	0.001	0.000	0.027	0.000	0.014	295.932	0.869	NaN	4.200156	0.1368503E-03	1.487020
07042011	05	0.020	0.005	0.005	0.000	0.000	0.000	0.001	0.000	0.025	0.000	0.014	295.804	0.871	NaN	4.357244	0.1740415E-03	1.398559
07042011	06	0.020	0.005	0.005	0.000	0.000	0.000	0.001	0.000	0.022	0.000	0.012	295.791	0.881	NaN	4.185189	0.1359760E-03	1.488253
07042011	07	0.020	0.004	0.005	0.000	0.000	0.000	0.001	0.000	0.018	0.000	0.010	296.893	0.873	NaN	3.356248	0.1237352E-03	1.433361
07042011	08	0.022	0.002	0.005	0.000	0.000	0.000	0.001	0.000	0.015	0.000	0.008	298.005	0.861	NaN	2.649964	0.8963310E-04	1.470772
07042011	09	0.024	0.003	0.003	0.000	0.000	0.000	0.000	0.000	0.016	0.000	0.008	299.234	0.825	0.6416559E-02	1.593626	0.9104259E-04	1.243142
07042011	10	0.040	0.004	0.003	0.000	0.000	0.000	0.000	0.000	0.019	0.000	0.010	300.394	0.778	0.7193089E-02	1.569859	0.8440617E-04	1.269486
07042011	11	0.059	0.007	0.004	0.000	0.000	0.000	0.000	0.000	0.024	0.000	0.012	301.369	0.744	0.8390784E-02	1.610738	0.7648838E-04	1.323429
07042011	12	0.075	0.012	0.006	0.000	0.000	0.000	0.000	0.000	0.030	0.000	0.015	302.341	0.711	0.9166658E-02	1.809409	0.8376424E-04	1.334478
07042011	13	0.063	0.026	0.012	0.000	0.000	0.000	0.000	0.000	0.042	0.000	0.021	303.550	0.675	0.7086277E-02	2.295082	0.1569067E-03	1.165157
07042011	14	0.062	0.035	0.015	0.000	0.000	0.000	0.000	0.000	0.045	0.000	0.023	303.997	0.655	0.6172180E-02	2.358974	0.1870392E-03	1.100791
07042011	15	0.065	0.034	0.015	0.000	0.000	0.000	0.000	0.000	0.043	0.000	0.022	303.188	0.671	0.7802844E-02	2.328043	0.1602647E-03	1.162153
07042011	16	0.070	0.032	0.014	0.000	0.000	0.000	0.000	0.000	0.039	0.000	0.020	302.030	0.698	0.1146889E-01	2.333722	0.1204792E-03	1.287137
07042011	17	0.069	0.034	0.013	0.000	0.000	0.000	0.000	0.000	0.037	0.000	0.019	300.617	0.733	0.1708752E-01	2.457956	0.1010783E-03	1.385916
07042011	18	0.070	0.032	0.012	0.000	0.000	0.000	0.000	0.001	0.036	0.000	0.018	299.165	0.762	NaN	3.378462	0.6410887E-04	1.721801
07042011	19	0.074	0.026	0.010	0.000	0.000	0.000	0.000	0.000	0.032	0.000	0.016	297.612	0.807	0.4769003E-01	2.914090	0.5371093E-04	1.734440
07042011	20	0.084	0.022	0.009	0.000	0.000	0.000	0.000	0.000	0.027	0.001	0.014	296.530	0.837	0.7399255E-01	3.039939	0.3604882E-04	1.925974
07042011	21	0.081	0.019	0.008	0.000	0.000	0.000	0.000	0.000	0.023	0.001	0.012	295.907	0.859	0.8298552E-01	2.970382	0.2897092E-04	2.010850
07042011	22	0.077	0.016	0.007	0.000	0.000	0.000	0.001	0.000	0.022	0.001	0.011	295.487	0.879	NaN	4.557234	0.2483536E-04	2.263631
07042011	23	0.069	0.017	0.007	0.000	0.000	0.000	0.001	0.001	0.024	0.001	0.013	295.247	0.892	NaN	5.295979	0.2995609E-04	2.247461
07042011	24	0.058	0.023	0.009	0.000	0.000	0.000	0.001	0.001	0.030	0.001	0.016	295.110	0.901	NaN	7.314549	0.4728304E-04	2.189482
07052011	01	0.055	0.030	0.010	0.000	0.000	0.000	0.002	0.002	0.034	0.002	0.020	295.039	0.905	NaN	9.799220	0.6235912E-04	2.196291
07052011	02	0.059	0.035	0.012	0.000	0.000	0.000	0.002	0.003	0.037	0.003	0.021	294.951	0.912	NaN	10.63657	0.5865023E-04	2.258532
07052011	03	0.070	0.035	0.012	0.000	0.000	0.000	0.002	0.003	0.037	0.004	0.020	294.875	0.919	NaN	11.99834	0.4544190E-04	2.421665
07052011	04	0.080	0.030	0.012	0.001	0.000	0.000	0.002	0.002	0.034	0.005	0.018	294.809	0.926	0.3414611	9.690457	0.2766227E-04	2.544456
07052011	05	0.084	0.025	0.011	0.001	0.001	0.000	0.003	0.002	0.031	0.006	0.016	294.747	0.932	0.3573304	8.867868	0.2072468E-04	2.631331
07052011	06	0.082	0.022	0.010	0.001	0.001	0.000	0.003	0.002	0.028	0.006	0.014	294.764	0.941	0.3902213	9.440152	0.1830118E-04	2.712500
07052011	07	0.067	0.017	0.014	0.001	0.001	0.001	0.003	0.001	0.025	0.007	0.012	295.675	0.938	0.3068381	8.843333	0.1982618E-04	2.649377
07052011	08	0.052	0.013	0.021	0.000	0.001	0.000	0.002	0.001	0.020	0.003	0.011	297.190	0.879	NaN	7.358534	0.7293734E-04	2.003841
07052011	09	0.044	0.011	0.021	0.000	0.000	0.000	0.001	0.001	0.018	0.001	0.010	298.361	0.841	NaN	4.798883	0.8800780E-04	1.736619
07052011	10	0.038	0.017	0.020	0.000	0.000	0.000	0.001	0.001	0.021	0.000	0.011	299.802	0.791	NaN	3.464824	0.1046146E-03	1.520089
07052011	11	0.030	0.018	0.018	0.000	0.000	0.000	0.001	0.001	0.023	0.000	0.013	301.150	0.743	NaN	2.808880	0.2056494E-03	1.135406
07052011	12	0.025	0.019	0.017	0.000	0.000	0.000	0.001	0.001	0.024	0.000	0.013	302.288	0.691	NaN	2.214768	0.2693830E-03	0.9149580
07052011	13	0.018	0.013	0.015	0.000	0.000	0.000	0.001	0.001	0.026	0.000	0.014	302.569	0.667	NaN	2.023680	0.5746519E-03	0.5467371
07052011	14	0.019	0.010	0.013	0.000	0.000	0.000	0.001	0.001	0.026	0.000	0.014	303.068	0.654	NaN	1.807889	0.4042202E-03	0.6505538
07052011	15	0.024	0.006	0.011	0.000	0.000	0.000	0.000	0.001	0.024	0.000	0.013	302.521	0.672	NaN	1.778723	0.2347870E-03	0.8794341
07052011	16	0.044	0.003	0.008	0.000	0.000	0.000	0.000	0.000	0.021	0.000	0.011	302.573	0.677	0.3168523E-02	1.202186	0.1140318E-03	1.022946
07052011	17	0.042	0.002	0.006	0.000	0.000	0.000	0.000	0.000	0.018	0.000	0.010	301.456	0.714	0.3994942E-02	1.206273	0.9940666E-04	1.084030
07052011	18	0.031	0.001	0.004	0.000	0.000	0.000	0.000	0.000	0.016	0.000	0.009	299.647	0.804	0.6451368E-02	1.543739	0.9326571E-04	1.218852
07052011	19	0.024	0.004	0.003	0.000	0.000	0.000	0.000	0.000	0.017	0.000	0.009	298.622	0.850	0.1038462E-01	2.013423	0.9369988E-04	1.332196
07052011	20	0.024	0.004	0.003	0.000	0.000	0.000	0.001	0.000	0.021	0.000	0.012	297.556	0.879	NaN	3.803751	0.1162669E-03	1.514756
07052011	21	0.028	0.004	0.003	0.001	0.001	0.000	0.001	0.001	0.027	0.000	0.015	296.972	0.872	0.5030990E-01	3.579706	0.5683271E-04	1.799249
07052011	22	0.029	0.005	0.004	0.001	0.001	0.000	0.001	0.001	0.031	0.000	0.018	296.338	0.900	0.6578332E-01	5.569455	0.8967281E-04	1.793152
07052011	23	0.033	0.006	0.004	0.001	0.001	0.000	0.002	0.002	0.035	0.000	0.020	296.108	0.886	0.7264507E-01	5.387665	0.8219848E-04	1.816537
07052011	24	0.047	0.007	0.005	0.001	0.001	0.000	0.002	0.002	0.038	0.001	0.022	295.636	0.920	0.1724209	8.439400	0.5964887E-04	2.150709
07062011	01	0.066	0.009	0.005	0.001	0.001	0.000	0.002	0.002	0.042	0.002	0.024	295.285	0.939	0.3540298	13.14803	0.4479287E-04	2.467652
07062011	02	0.082	0.010	0.003	0.002	0.001	0.000	0.002	0.002	0.045	0.003	0.025	294.930	0.961	0.6103772	22.56025	0.3794215E-04	2.774222
07062011	03	0.100	0.010	0.003	0.003	0.001	0.001	0.002	0.003	0.047	0.004	0.025	294.738	0.972	0.7856990	32.26121	0.3020387E-04	3.028618
07062011	04	0.118	0.011	0.003	0.003	0.001	0.001	0.003	0.003	0.048	0.006	0.025	294.632	0.974	0.8284569	34.35722	0.2615235E-04	3.118507
07062011	05	0.133	0.012	0.003	0.003	0.002	0.001	0.003	0.003	0.049	0.007	0.026	294.571	0.975	0.9226823	58.05235	0.2818425E-04	3.313813
07062011	06	0.138	0.014	0.003	0.003	0.002	0.001	0.004	0.004	0.051	0.009	0.027	294.648	0.974	0.8676139	38.56094	0.2414559E-04	3.203310
07062011	07	0.112	0.015	0.006	0.003	0.002	0.001	0.004	0.004	0.057	0.013	0.029	295.636	0.963	0.7491996	32.24423	0.3524134E-04	2.961400
07062011	08	0.033	0.019	0.019	0.004	0.002	0.001	0.003	0.004	0.075	0.010	0.037	296.925	0.930	0.2481878	18.08446	0.1185317E-03	2.183471
07062011	09	0.003	0.033	0.011	0.000	0.000	0.000	0.000	0.001	0.017	0.000	0.009	297.828	0.908	NaN	3.876038	0.4199434E-02	-0.3480274E-01
07062011	10	0.002	0.035	0.026	0.000	0.000	0.000	0.000	0.001	0.030	0.000	0.020	299.107	0.846	0.3445148E-02	4.097641	0.3954426E-02	0.1545046E-01
07062011	11	0.001	0.020	0.022	0.000	0.000	0.000	0.000	0.001	0.029	0.000	0.025	299.488	0.815	0.7042289E-03	4.420369	0.4374814E-02	0.4498854E-02
07062011	12	0.007	0.005	0.011	0.000	0.000	0.000	0.000	0.000	0.044	0.000	0.023	300.342	0.777	0.3054976E-02	3.610675	0.1074937E-02	0.5262055
07062011	13	0.006	0.010	0.011	0.000	0.000	0.000	0.000	0.000	0.047	0.000	0.024	301.716	0.721	0.1731098E-02	2.996255	0.1316331E-02	0.3572137
07062011	14	0.005	0.017	0.012	0.000	0.000	0.000	0.000	0.000	0.049	0.000	0.025	302.237	0.696	0.1334488E-02	2.917153	0.1582982E-02	0.2654833
07062011	15	0.010	0.019	0.013	0.000	0.000	0.000	0.000	0.000	0.050	0.000	0.025	302.336	0.684	0.2023220E-02	2.732241	0.9595976E-03	0.4544298
07062011	16	0.024	0.022	0.013	0.000	0.000	0.000	0.000	0.000	0.045	0.000	0.023	302.071	0.688	0.4246116E-02	2.595937	0.4178218E-03	0.7933030
07062011	17	0.037	0.022	0.012	0.000	0.000	0.000	0.000	0.000	0.040	0.000	0.020	301.731	0.699	0.6627262E-02	2.333722	0.2207556E-03	1.024137
07062011	18	0.056	0.018	0.012	0.000	0.000	0.000	0.000	0.000	0.036	0.000	0.018	301.486	0.707	0.9965301E-02	2.171291	0.1273456E-03	1.231734
07062011	19	0.068	0.011	0.011	0.000	0.000	0.000	0.000	0.000	0.031	0.000	0.016	300.853	0.710	0.1223016E-01	1.930036	0.9058500E-04	1.328509
07062011	20	0.069	0.008	0.008	0.000	0.000	0.000	0.001	0.000	0.026	0.000	0.014	299.253	0.752	NaN	2.515059	0.5182089E-04	1.686043
07062011	21	0.047	0.006	0.006	0.000	0.000	0.000	0.001	0.000	0.024	0.000	0.013	297.851	0.800	NaN	2.798641	0.6549610E-04	1.630732
07062011	22	0.036	0.006	0.006	0.000	0.000	0.000	0.001	0.000	0.024	0.000	0.013	297.070	0.819	NaN	3.107599	0.8279164E-04	1.574438
07062011	23	0.048	0.007	0.007	0.001	0.000	0.000	0.001	0.000	0.025	0.000	0.014	296.587	0.837	0.4133767E-01	2.960670	0.6143749E-04	1.682956
07062011	24	0.067	0.009	0.008	0.001	0.001	0.000	0.002	0.001	0.025	0.001	0.014	296.131	0.864	0.7873487E-01	3.194725	0.3087100E-04	2.014883
07072011	01	0.083	0.012	0.009	0.001	0.001	0.000	0.002	0.001	0.027	0.001	0.015	295.703	0.896	0.1687598	4.987383	0.2392789E-04	2.318968
07072011	02	0.090	0.015	0.010	0.001	0.001	0.000	0.002	0.001	0.029	0.002	0.016	295.395	0.915	0.2678427	7.163147	0.2279207E-04	2.497320
07072011	03	0.091	0.018	0.011	0.001	0.001	0.000	0.002	0.001	0.032	0.004	0.017	295.215	0.919	0.3002555	7.991513	0.2422757E-04	2.518319
07072011	04	0.088	0.021	0.013	0.001	0.001	0.000	0.002	0.001	0.033	0.005	0.017	295.070	0.919	0.3099801	8.338120	0.2510645E-04	2.521283
07072011	05	0.084	0.023	0.014	0.001	0.001	0.000	0.003	0.001	0.035	0.005	0.018	294.945	0.920	0.3252097	8.931226	0.2665171E-04	2.525186
07072011	06	0.080	0.025	0.016	0.001	0.001	0.001	0.003	0.001	0.036	0.006	0.018	294.956	0.919	0.3377537	9.299015	0.2583175E-04	2.556283
07072011	07	0.078	0.025	0.021	0.001	0.001	0.001	0.003	0.001	0.039	0.009	0.019	296.198	0.919	0.2896469	10.08640	0.3199447E-04	2.498662
07072011	08	0.064	0.021	0.035	0.001	0.001	0.001	0.003	0.001	0.042	0.009	0.020	298.192	0.862	0.8598620E-01	5.119972	0.4522329E-04	2.053905
07072011	09	0.024	0.038	0.035	0.000	0.000	0.000	0.001	0.001	0.037	0.001	0.020	299.357	0.813	NaN	5.892898	0.7175060E-02	-0.8549664E-01
07072011	10	0.019	0.035	0.028	0.000	0.000	0.000	0.001	0.001	0.036	0.001	0.019	300.661	0.748	NaN	3.902821	0.5586008E-02	-0.1557229
07072011	11	0.025	0.022	0.022	0.000	0.000	0.000	0.000	0.001	0.034	0.000	0.018	301.617	0.705	NaN	3.238602	0.8305435E-03	0.5909953
07072011	12	0.047	0.012	0.017	0.000	0.000	0.000	0.000	0.001	0.030	0.000	0.016	302.550	0.665	NaN	2.402223	0.1199775E-03	1.301513
07072011	13	0.079	0.004	0.011	0.000	0.000	0.000	0.000	0.000	0.028	0.000	0.014	303.344	0.628	0.4935980E-02	1.310861	0.8768213E-04	1.174646
07072011	14	0.089	0.002	0.008	0.000	0.000	0.000	0.000	0.000	0.024	0.000	0.012	303.332	0.625	0.4784346E-02	1.123595	0.6664790E-04	1.226824
07072011	15	0.093	0.001	0.006	0.000	0.000	0.000	0.000	0.000	0.019	0.000	0.010	303.032	0.640	0.4621029E-02	0.9643201	0.5215806E-04	1.266900
07072011	16	0.082	0.001	0.004	0.000	0.000	0.000	0.000	0.000	0.016	0.000	0.008	302.530	0.655	0.4055738E-02	0.8205128	0.4432996E-04	1.267388
07072011	17	0.069	0.001	0.004	0.000	0.000	0.000	0.000	0.000	0.016	0.000	0.008	301.967	0.660	0.3884375E-02	0.8205128	0.5090246E-04	1.207347
07072011	18	0.058	0.002	0.005	0.000	0.000	0.000	0.000	0.000	0.017	0.000	0.009	301.362	0.660	0.4149079E-02	0.9230769	0.6670302E-04	1.141092
07072011	19	0.059	0.005	0.005	0.000	0.000	0.000	0.001	0.001	0.018	0.000	0.011	300.631	0.718	NaN	1.540094	0.4641202E-04	1.520917
07072011	20	0.066	0.010	0.005	0.001	0.001	0.000	0.001	0.002	0.019	0.000	0.012	299.318	0.744	0.1589596E-01	1.347416	0.3504529E-04	1.584872
07072011	21	0.076	0.014	0.005	0.001	0.001	0.001	0.002	0.003	0.017	0.000	0.013	298.270	0.761	0.2564800E-01	1.502221	0.2119005E-04	1.850602
07072011	22	0.084	0.016	0.005	0.001	0.001	0.001	0.003	0.004	0.015	0.000	0.014	297.507	0.782	0.3648895E-01	1.617012	0.1554616E-04	2.017090
07072011	23	0.093	0.018	0.005	0.001	0.001	0.001	0.003	0.005	0.014	0.001	0.014	296.908	0.806	0.5245548E-01	1.676103	0.1073291E-04	2.193583
07072011	24	0.102	0.018	0.005	0.001	0.001	0.001	0.003	0.005	0.014	0.001	0.014	296.349	0.840	0.7965094E-01	1.975701	0.9083208E-05	2.337482
07082011	01	0.108	0.018	0.005	0.001	0.001	0.001	0.004	0.005	0.013	0.001	0.014	295.799	0.882	0.1401361	2.630101	0.6898501E-05	2.581218
07082011	02	0.107	0.018	0.005	0.001	0.002	0.001	0.004	0.006	0.012	0.001	0.014	295.406	0.908	0.2248688	3.269442	0.4961520E-05	2.818859
07082011	03	0.104	0.017	0.004	0.001	0.002	0.001	0.004	0.006	0.010	0.002	0.015	295.212	0.911	0.2268827	3.634070	0.6537311E-05	2.744994
07082011	04	0.101	0.017	0.004	0.001	0.002	0.001	0.004	0.007	0.009	0.002	0.015	295.097	0.907	0.2216435	3.262970	0.5266465E-05	2.792094
07082011	05	0.102	0.017	0.005	0.001	0.002	0.001	0.005	0.007	0.008	0.002	0.015	295.019	0.901	0.2162794	2.979434	0.4479179E-05	2.822936
07082011	06	0.106	0.019	0.006	0.001	0.002	0.002	0.005	0.008	0.007	0.003	0.015	295.043	0.898	0.2843455	2.922594	0.2355004E-05	3.093777
07082011	07	0.108	0.019	0.010	0.001	0.002	0.002	0.006	0.009	0.007	0.005	0.015	296.253	0.898	0.2911583	3.030460	0.1744425E-05	3.239856
07082011	08	0.099	0.016	0.020	0.001	0.003	0.002	0.006	0.009	0.008	0.006	0.015	298.151	0.838	0.1236641	1.730465	0.1382858E-05	3.097385
07082011	09	0.094	0.043	0.022	0.000	0.002	0.001	0.003	0.005	0.019	0.002	0.016	299.558	0.792	NaN	4.080630	0.2476658E-04	2.216861
07082011	10	0.080	0.062	0.028	0.000	0.001	0.000	0.001	0.002	0.026	0.001	0.016	301.211	0.730	NaN	3.713965	0.5510322E-04	1.828661
07082011	11	0.058	0.048	0.027	0.000	0.000	0.000	0.001	0.001	0.026	0.000	0.015	302.347	0.679	NaN	2.884209	0.9057116E-04	1.503037
07082011	12	0.052	0.024	0.021	0.000	0.000	0.000	0.000	0.001	0.028	0.000	0.015	302.709	0.666	NaN	2.493957	0.9978948E-04	1.397804
07082011	13	0.078	0.008	0.016	0.000	0.000	0.000	0.001	0.001	0.031	0.000	0.017	303.269	0.649	NaN	2.276592	0.6251177E-04	1.561324
07082011	14	0.088	0.004	0.014	0.000	0.000	0.000	0.001	0.001	0.035	0.000	0.019	303.447	0.647	NaN	2.386160	0.6563803E-04	1.560544
07082011	15	0.089	0.003	0.012	0.000	0.000	0.000	0.001	0.001	0.038	0.000	0.021	303.165	0.657	NaN	2.583692	0.7673999E-04	1.527219
07082011	16	0.082	0.002	0.011	0.000	0.000	0.000	0.001	0.001	0.039	0.000	0.021	302.829	0.665	NaN	2.626623	0.8263494E-04	1.502234
07082011	17	0.063	0.002	0.009	0.000	0.000	0.000	0.001	0.001	0.038	0.000	0.021	302.170	0.682	NaN	2.616461	0.1119633E-03	1.368639
07082011	18	0.060	0.002	0.008	0.000	0.000	0.000	0.001	0.002	0.036	0.000	0.020	301.328	0.744	NaN	2.941804	0.9316650E-04	1.499354
07082011	19	0.074	0.003	0.008	0.001	0.000	0.000	0.001	0.002	0.036	0.000	0.021	300.645	0.783	0.2523685E-01	2.971989	0.7724445E-04	1.585180
07082011	20	0.076	0.005	0.008	0.001	0.000	0.001	0.002	0.004	0.036	0.000	0.023	299.484	0.776	0.3484297E-01	3.022454	0.5764802E-04	1.719575
07082011	21	0.079	0.008	0.008	0.001	0.001	0.001	0.003	0.006	0.034	0.000	0.025	298.801	0.766	0.4796940E-01	2.920121	0.4706384E-04	1.792714
07082011	22	0.088	0.011	0.009	0.001	0.001	0.001	0.004	0.008	0.033	0.001	0.027	298.306	0.774	0.5363834E-01	2.923366	0.3958043E-04	1.868403
07082011	23	0.095	0.013	0.010	0.001	0.001	0.002	0.004	0.009	0.033	0.001	0.028	297.892	0.796	0.7736218E-01	3.401766	0.2914174E-04	2.067189
07082011	24	0.100	0.014	0.011	0.001	0.001	0.002	0.004	0.009	0.034	0.002	0.029	297.468	0.830	0.1099573	4.197742	0.2806542E-04	2.174844
07092011	01	0.101	0.014	0.010	0.001	0.001	0.002	0.004	0.009	0.035	0.002	0.029	297.000	0.874	0.1667337	5.463735	0.2505794E-04	2.338544
07092011	02	0.093	0.014	0.009	0.001	0.001	0.002	0.004	0.009	0.036	0.003	0.030	296.701	0.902	0.2294160	7.512659	0.2826559E-04	2.424536
07092011	03	0.078	0.013	0.008	0.001	0.001	0.002	0.004	0.009	0.038	0.003	0.030	296.595	0.913	0.2321473	8.266643	0.3198425E-04	2.412393
07092011	04	0.068	0.013	0.008	0.001	0.001	0.002	0.004	0.008	0.040	0.003	0.030	296.569	0.917	0.2461830	9.730472	0.3837740E-04	2.404058
07092011	05	0.062	0.014	0.009	0.001	0.001	0.001	0.004	0.008	0.042	0.003	0.030	296.560	0.921	0.2241914	9.751325	0.4518529E-04	2.334067
07092011	06	0.064	0.015	0.009	0.001	0.001	0.002	0.005	0.007	0.042	0.003	0.031	296.657	0.924	0.2447606	10.60149	0.4510185E-04	2.371172
07092011	07	0.080	0.015	0.011	0.001	0.001	0.002	0.005	0.008	0.041	0.004	0.031	298.080	0.899	0.1712114	8.090990	0.3877767E-04	2.319420
07092011	08	0.085	0.011	0.016	0.001	0.001	0.002	0.005	0.008	0.039	0.004	0.030	300.053	0.852	0.7271993E-01	5.127676	0.4151743E-04	2.091690
07092011	09	0.054	0.009	0.017	0.000	0.001	0.001	0.003	0.005	0.039	0.001	0.027	301.199	0.814	NaN	5.855605	0.1263061E-03	1.666148
07092011	10	0.032	0.022	0.020	0.000	0.000	0.000	0.001	0.003	0.043	0.001	0.025	302.618	0.754	NaN	4.491857	0.4828867E-03	0.9685807
07092011	11	0.024	0.023	0.017	0.000	0.000	0.000	0.001	0.002	0.042	0.000	0.023	303.108	0.724	NaN	3.565413	0.6266617E-03	0.7550766
07092011	12	0.048	0.008	0.011	0.000	0.000	0.000	0.001	0.001	0.034	0.000	0.019	303.829	0.687	NaN	2.584889	0.1511960E-03	1.232902
07092011	13	0.076	0.004	0.008	0.000	0.000	0.000	0.000	0.001	0.028	0.000	0.015	304.791	0.648	NaN	1.738738	0.7102410E-04	1.388828
07092011	14	0.086	0.003	0.007	0.000	0.000	0.000	0.000	0.001	0.025	0.000	0.013	305.018	0.637	NaN	1.448256	0.5195663E-04	1.445204
07092011	15	0.093	0.002	0.006	0.000	0.000	0.000	0.000	0.001	0.023	0.000	0.012	304.667	0.644	NaN	1.310489	0.4335519E-04	1.480392
07092011	16	0.091	0.002	0.006	0.000	0.000	0.000	0.000	0.001	0.022	0.000	0.012	304.587	0.641	NaN	1.310362	0.4468889E-04	1.467192
07092011	17	0.089	0.002	0.006	0.000	0.000	0.000	0.000	0.001	0.021	0.000	0.011	303.735	0.648	NaN	1.256431	0.3792363E-04	1.520229
07092011	18	0.090	0.002	0.006	0.000	0.000	0.000	0.001	0.000	0.021	0.000	0.011	301.767	0.752	NaN	1.953071	0.3426607E-04	1.755854
07092011	19	0.072	0.004	0.005	0.000	0.000	0.000	0.001	0.000	0.023	0.000	0.013	300.525	0.817	NaN	3.001562	0.4936079E-04	1.783965
07092011	20	0.033	0.007	0.005	0.001	0.000	0.000	0.001	0.000	0.028	0.000	0.015	299.287	0.822	0.3069413E-01	2.824633	0.5748947E-04	1.691374
07092011	21	0.013	0.011	0.004	0.001	0.000	0.000	0.001	0.001	0.034	0.000	0.018	298.516	0.837	0.4430372E-01	3.575175	0.6756277E-04	1.723590
07092011	22	0.012	0.012	0.004	0.001	0.000	0.000	0.001	0.001	0.038	0.000	0.020	298.213	0.838	0.4940230E-01	3.997116	0.7560896E-04	1.723173
07092011	23	0.035	0.009	0.004	0.001	0.000	0.000	0.001	0.000	0.040	0.000	0.021	298.013	0.842	0.5447686E-01	4.419057	0.8361815E-04	1.723029
07092011	24	0.064	0.008	0.004	0.001	0.000	0.000	0.001	0.000	0.038	0.000	0.020	297.744	0.862	0.7089913E-01	4.778776	0.6760633E-04	1.849329
07102011	01	0.081	0.007	0.004	0.001	0.000	0.000	0.001	0.000	0.036	0.000	0.019	297.460	0.883	0.1073619	5.285684	0.4634901E-04	2.057061
07102011	02	0.086	0.006	0.003	0.001	0.000	0.000	0.001	0.000	0.033	0.000	0.017	297.172	0.904	0.1361398	5.647980	0.3508378E-04	2.206787
07102011	03	0.093	0.005	0.003	0.001	0.000	0.000	0.001	0.000	0.029	0.001	0.015	297.003	0.904	0.1362977	5.031768	0.2795963E-04	2.255189
07102011	04	0.105	0.005	0.004	0.001	0.000	0.000	0.001	0.000	0.027	0.001	0.013	296.860	0.901	0.1435971	4.425437	0.2090398E-04	2.325727
07102011	05	0.114	0.005	0.004	0.001	0.000	0.000	0.001	0.000	0.025	0.001	0.013	296.712	0.906	0.1778626	4.970934	0.1880646E-04	2.422131
07102011	06	0.104	0.006	0.005	0.002	0.000	0.000	0.002	0.000	0.026	0.001	0.013	296.716	0.909	0.1723642	5.029844	0.1890935E-04	2.424878
07102011	07	0.086	0.008	0.007	0.002	0.000	0.000	0.002	0.000	0.029	0.001	0.014	297.794	0.908	0.1273121	5.360389	0.2668025E-04	2.303006
07102011	08	0.043	0.006	0.011	0.001	0.000	0.000	0.002	0.000	0.032	0.001	0.017	299.022	0.875	0.3999591E-01	4.701087	0.8275863E-04	1.754385
07102011	09	0.015	0.006	0.012	0.000	0.000	0.000	0.001	0.000	0.037	0.000	0.019	300.140	0.838	NaN	5.271881	0.8785930E-03	0.7781778
07102011	10	0.021	0.007	0.013	0.000	0.000	0.000	0.001	0.000	0.040	0.000	0.021	301.147	0.785	NaN	4.478503	0.6456496E-03	0.8411359
07102011	11	0.031	0.007	0.014	0.000	0.000	0.000	0.000	0.000	0.039	0.000	0.020	302.325	0.763	0.6437302E-02	2.894356	0.2572591E-03	1.051181
07102011	12	0.014	0.013	0.014	0.000	0.000	0.000	0.000	0.000	0.039	0.000	0.020	303.268	0.729	0.2048194E-02	2.587322	0.6264592E-03	0.6159577
07102011	13	0.028	0.013	0.011	0.000	0.000	0.000	0.000	0.000	0.038	0.000	0.019	304.102	0.700	0.2799153E-02	2.217036	0.3212494E-03	0.8389304
07102011	14	0.045	0.011	0.008	0.000	0.000	0.000	0.000	0.000	0.034	0.000	0.017	304.350	0.688	0.3591061E-02	1.918736	0.1848798E-03	1.016126
07102011	15	0.055	0.010	0.006	0.000	0.000	0.000	0.000	0.000	0.032	0.000	0.016	303.650	0.703	0.5083978E-02	1.866978	0.1344688E-03	1.142518
07102011	16	0.043	0.009	0.006	0.000	0.000	0.000	0.000	0.000	0.028	0.000	0.014	302.694	0.728	0.5023837E-02	1.811126	0.1359046E-03	1.124714
07102011	17	0.044	0.004	0.005	0.000	0.000	0.000	0.000	0.000	0.022	0.000	0.011	301.621	0.750	0.5718350E-02	1.532033	0.9428291E-04	1.210835
07102011	18	0.047	0.002	0.005	0.000	0.000	0.000	0.000	0.000	0.018	0.000	0.009	300.547	0.772	0.7107139E-02	1.355422	0.6483445E-04	1.320269
07102011	19	0.060	0.003	0.005	0.000	0.000	0.000	0.001	0.000	0.015	0.000	0.008	299.355	0.843	NaN	2.332599	0.3038365E-04	1.885200
07102011	20	0.065	0.003	0.004	0.000	0.000	0.000	0.001	0.000	0.014	0.000	0.008	298.101	0.877	NaN	2.952276	0.2512639E-04	2.070027
07102011	21	0.079	0.004	0.003	0.000	0.000	0.000	0.001	0.000	0.015	0.000	0.008	297.556	0.874	NaN	2.549537	0.1888768E-04	2.130283
07102011	22	0.103	0.005	0.004	0.000	0.000	0.000	0.001	0.000	0.018	0.000	0.010	297.195	0.887	NaN	3.836809	0.1768730E-04	2.336309
07102011	23	0.143	0.006	0.004	0.000	0.001	0.000	0.001	0.000	0.020	0.001	0.011	297.023	0.887	NaN	4.365069	0.1332842E-04	2.515213
07102011	24	0.190	0.007	0.005	0.000	0.001	0.000	0.002	0.000	0.023	0.001	0.012	296.888	0.888	NaN	4.872032	0.1025382E-04	2.676825
07112011	01	0.233	0.009	0.006	0.000	0.001	0.000	0.002	0.000	0.025	0.002	0.013	296.746	0.895	NaN	6.194999	0.9229929E-05	2.826843
07112011	02	0.255	0.012	0.007	0.001	0.001	0.000	0.002	0.000	0.027	0.003	0.013	296.668	0.899	0.3466463	5.145496	0.7732895E-05	2.823085
07112011	03	0.253	0.013	0.008	0.001	0.001	0.000	0.002	0.000	0.029	0.004	0.014	296.654	0.899	0.3684772	5.710763	0.8550372E-05	2.824709
07112011	04	0.240	0.015	0.009	0.001	0.001	0.000	0.002	0.000	0.032	0.005	0.015	296.661	0.896	0.3766214	6.247100	0.9788764E-05	2.804951
07112011	05	0.228	0.018	0.010	0.001	0.001	0.000	0.002	0.000	0.035	0.005	0.016	296.665	0.895	0.3797860	6.677874	0.1106622E-04	2.780639
07112011	06	0.218	0.022	0.013	0.001	0.001	0.000	0.003	0.000	0.040	0.007	0.018	296.738	0.895	0.4105615	7.942947	0.1290714E-04	2.789152
07112011	07	0.208	0.028	0.019	0.002	0.001	0.000	0.003	0.000	0.051	0.016	0.019	297.933	0.897	0.3909220	9.670213	0.1630182E-04	2.773200
07112011	08	0.151	0.025	0.044	0.005	0.001	0.001	0.003	0.000	0.064	0.023	0.021	299.605	0.862	0.1857523	7.069700	0.2385535E-04	2.471815
07112011	09	0.028	0.038	0.061	0.000	0.000	0.000	0.001	0.000	0.055	0.003	0.028	300.716	0.822	NaN	8.454112	0.2553326E-01	-0.4800383
07112011	10	0.003	0.058	0.055	0.000	0.000	0.000	0.001	0.000	0.061	0.001	0.032	302.339	0.764	NaN	4.687071	0.4834711E-01	-1.013469
07112011	11	0.004	0.082	0.049	0.000	0.000	0.000	0.001	0.001	0.053	0.000	0.032	303.753	0.713	0.3172040E-02	3.610187	0.6016061E-02	-0.2217826
07112011	12	0.005	0.053	0.032	0.000	0.000	0.000	0.000	0.001	0.047	0.000	0.029	304.028	0.694	0.2208591E-02	3.040115	0.5763615E-02	-0.2778049
07112011	13	0.043	0.016	0.018	0.000	0.000	0.000	0.000	0.001	0.047	0.000	0.024	304.907	0.663	NaN	3.161872	0.2751889E-03	1.060313
07112011	14	0.077	0.005	0.011	0.000	0.000	0.000	0.000	0.000	0.043	0.000	0.022	305.120	0.658	0.5694687E-02	2.256410	0.1531424E-03	1.168323
07112011	15	0.089	0.002	0.007	0.000	0.000	0.000	0.000	0.000	0.036	0.000	0.019	304.705	0.672	0.6490171E-02	2.010582	0.1114050E-03	1.256417
07112011	16	0.079	0.001	0.006	0.000	0.000	0.000	0.000	0.000	0.031	0.000	0.016	304.229	0.681	0.5734205E-02	1.748634	0.1006055E-03	1.240077
07112011	17	0.066	0.001	0.006	0.000	0.000	0.000	0.000	0.001	0.029	0.000	0.015	303.460	0.689	NaN	1.891283	0.7883721E-04	1.380025
07112011	18	0.067	0.002	0.005	0.000	0.000	0.000	0.001	0.001	0.028	0.000	0.015	302.286	0.753	NaN	2.290910	0.6600013E-04	1.540463
07112011	19	0.056	0.003	0.006	0.001	0.000	0.000	0.001	0.001	0.031	0.000	0.017	301.378	0.771	0.2270812E-01	2.398771	0.5161816E-04	1.667186
07112011	20	0.051	0.004	0.006	0.001	0.001	0.000	0.001	0.002	0.034	0.000	0.020	300.110	0.809	0.3114587E-01	3.241710	0.6957907E-04	1.668296
07112011	21	0.053	0.004	0.005	0.001	0.001	0.001	0.002	0.003	0.035	0.000	0.021	299.495	0.818	0.3568268E-01	3.435809	0.6059696E-04	1.753578
07112011	22	0.067	0.005	0.005	0.002	0.001	0.001	0.002	0.003	0.037	0.000	0.023	299.130	0.821	0.4578584E-01	3.821920	0.6217352E-04	1.788676
07112011	23	0.095	0.006	0.005	0.002	0.001	0.001	0.003	0.004	0.040	0.001	0.026	298.849	0.829	0.9206110E-01	4.460506	0.4299252E-04	2.015991
07112011	24	0.141	0.008	0.005	0.002	0.001	0.001	0.003	0.004	0.045	0.001	0.028	298.527	0.847	0.1621048	5.525268	0.3092464E-04	2.252049
07122011	01	0.190	0.010	0.005	0.002	0.001	0.001	0.003	0.004	0.053	0.002	0.031	298.151	0.875	0.2861483	7.865191	0.2463647E-04	2.504131
07122011	02	0.219	0.013	0.005	0.002	0.001	0.001	0.003	0.003	0.061	0.003	0.034	297.930	0.889	0.3861314	10.02438	0.2420059E-04	2.617232
07122011	03	0.222	0.016	0.005	0.002	0.001	0.001	0.003	0.003	0.069	0.004	0.038	297.787	0.901	0.4588688	12.59236	0.2661811E-04	2.674930
07122011	04	0.218	0.020	0.005	0.002	0.001	0.001	0.003	0.003	0.075	0.004	0.040	297.753	0.905	0.5094557	14.86887	0.2795331E-04	2.725845
07122011	05	0.212	0.024	0.005	0.002	0.001	0.001	0.003	0.003	0.081	0.005	0.042	297.747	0.908	0.5186932	15.76578	0.3029753E-04	2.716308
07122011	06	0.204	0.029	0.006	0.002	0.002	0.001	0.003	0.002	0.086	0.006	0.044	297.830	0.913	0.5269526	17.17645	0.3435949E-04	2.698887
07122011	07	0.193	0.032	0.009	0.002	0.002	0.001	0.004	0.002	0.092	0.010	0.046	299.097	0.903	0.4280019	16.48157	0.4213220E-04	2.592384
07122011	08	0.150	0.050	0.026	0.001	0.002	0.001	0.003	0.002	0.097	0.013	0.047	300.913	0.875	0.2400589	14.18379	0.6674592E-04	2.327368
07122011	09	0.037	0.135	0.041	0.000	0.002	0.000	0.002	0.002	0.093	0.003	0.049	301.941	0.842	NaN	14.65872	0.2999720E-02	0.6890155
07122011	10	0.041	0.108	0.039	0.000	0.001	0.000	0.001	0.001	0.069	0.001	0.037	303.017	0.801	NaN	9.605064	0.1974298E-02	0.6870876
07122011	11	0.029	0.050	0.032	0.000	0.001	0.000	0.001	0.001	0.055	0.001	0.029	303.101	0.789	NaN	7.067170	0.2517923E-02	0.4482031
07122011	12	0.023	0.013	0.020	0.000	0.000	0.000	0.000	0.001	0.044	0.000	0.023	303.430	0.777	NaN	4.926095	0.1155247E-02	0.6298278
07122011	13	0.031	0.006	0.014	0.000	0.000	0.000	0.000	0.001	0.040	0.000	0.021	304.003	0.752	NaN	3.733666	0.3628359E-03	1.012425
07122011	14	0.047	0.006	0.012	0.000	0.000	0.000	0.000	0.001	0.039	0.000	0.021	304.158	0.744	NaN	3.477187	0.1935496E-03	1.254436
07122011	15	0.074	0.006	0.010	0.000	0.000	0.000	0.000	0.001	0.042	0.000	0.022	304.028	0.741	NaN	3.489468	0.1121958E-03	1.492782
07122011	16	0.061	0.007	0.009	0.000	0.000	0.000	0.000	0.001	0.042	0.000	0.022	303.645	0.741	NaN	3.415600	0.1375588E-03	1.394978
07122011	17	0.053	0.009	0.009	0.000	0.000	0.000	0.000	0.001	0.046	0.000	0.024	303.146	0.740	NaN	3.677579	0.1751392E-03	1.322179
07122011	18	0.063	0.016	0.010	0.000	0.001	0.000	0.001	0.001	0.055	0.000	0.030	302.597	0.760	NaN	4.939242	0.1734192E-03	1.454563
07122011	19	0.054	0.018	0.007	0.001	0.001	0.000	0.001	0.002	0.063	0.001	0.034	301.879	0.786	0.4081285E-01	5.251040	0.1175951E-03	1.649856
07122011	20	0.048	0.019	0.006	0.002	0.001	0.000	0.002	0.002	0.065	0.001	0.037	300.361	0.803	0.5188149E-01	5.997711	0.1412083E-03	1.628125
07122011	21	0.042	0.018	0.004	0.002	0.002	0.001	0.002	0.003	0.066	0.001	0.038	299.607	0.804	0.6237590E-01	6.059232	0.1249590E-03	1.685650
07122011	22	0.034	0.017	0.004	0.003	0.002	0.001	0.002	0.003	0.064	0.001	0.037	298.903	0.834	0.7055902E-01	6.815929	0.1499728E-03	1.657513
07122011	23	0.031	0.015	0.003	0.003	0.002	0.001	0.002	0.004	0.060	0.001	0.036	298.617	0.828	0.7251245E-01	6.417523	0.1281033E-03	1.699807
07122011	24	0.034	0.015	0.003	0.003	0.002	0.001	0.003	0.004	0.056	0.001	0.035	298.155	0.851	0.7523072E-01	6.955232	0.1253734E-03	1.744106
07132011	01	0.044	0.017	0.004	0.002	0.002	0.001	0.003	0.005	0.052	0.001	0.033	297.796	0.865	0.8517426E-01	7.191846	0.1058274E-03	1.832242
07132011	02	0.063	0.020	0.004	0.002	0.003	0.001	0.003	0.005	0.049	0.001	0.032	297.480	0.874	0.1216903	7.006145	0.6880014E-04	2.007890
07132011	03	0.078	0.023	0.005	0.002	0.003	0.001	0.003	0.005	0.046	0.002	0.031	297.281	0.878	0.1599062	7.380014	0.5196610E-04	2.152337
07132011	04	0.086	0.027	0.007	0.001	0.003	0.001	0.003	0.005	0.045	0.002	0.030	297.122	0.881	0.1764343	7.188611	0.4395219E-04	2.213665
07132011	05	0.087	0.029	0.009	0.001	0.003	0.001	0.003	0.005	0.043	0.003	0.029	296.983	0.884	0.1812539	7.029562	0.4160025E-04	2.227832
07132011	06	0.082	0.030	0.010	0.001	0.003	0.001	0.004	0.005	0.041	0.003	0.028	296.900	0.892	0.1930134	7.404053	0.3855728E-04	2.283363
07132011	07	0.075	0.027	0.012	0.001	0.003	0.001	0.004	0.005	0.038	0.003	0.027	298.008	0.890	0.1357727	6.989875	0.4407868E-04	2.200241
07132011	08	0.059	0.021	0.016	0.002	0.003	0.001	0.003	0.004	0.043	0.003	0.028	299.772	0.848	0.5615234E-01	5.524817	0.7909649E-04	1.844161
07132011	09	0.031	0.036	0.026	0.000	0.001	0.000	0.001	0.002	0.047	0.001	0.027	300.944	0.819	NaN	7.474449	0.1075728E-02	0.8418768
07132011	10	0.056	0.027	0.020	0.000	0.001	0.000	0.001	0.002	0.047	0.001	0.026	302.368	0.767	NaN	5.305031	0.1745864E-03	1.482678
07132011	11	0.075	0.015	0.015	0.000	0.001	0.000	0.001	0.001	0.046	0.000	0.025	303.430	0.717	NaN	3.915757	0.1183085E-03	1.519800
07132011	12	0.114	0.010	0.013	0.000	0.001	0.000	0.001	0.001	0.044	0.000	0.023	304.929	0.660	NaN	2.853532	0.6926167E-04	1.614890
07132011	13	0.117	0.004	0.010	0.000	0.000	0.000	0.000	0.001	0.042	0.000	0.022	305.292	0.641	NaN	2.440931	0.7342744E-04	1.521697
07132011	14	0.137	0.001	0.006	0.000	0.000	0.000	0.000	0.000	0.035	0.000	0.018	304.916	0.667	0.9157300E-02	1.904762	0.6807128E-04	1.446877
07132011	15	0.132	0.001	0.005	0.000	0.000	0.000	0.000	0.000	0.027	0.000	0.014	304.066	0.697	0.9633601E-02	1.633606	0.5029804E-04	1.511596
07132011	16	0.097	0.001	0.005	0.000	0.000	0.000	0.000	0.000	0.023	0.000	0.012	303.195	0.723	0.8143306E-02	1.498127	0.5437133E-04	1.440179
07132011	17	0.080	0.001	0.004	0.000	0.000	0.000	0.000	0.000	0.023	0.000	0.012	302.077	0.756	0.1064563E-01	1.736614	0.5779569E-04	1.477808
07132011	18	0.096	0.001	0.004	0.000	0.000	0.000	0.000	0.000	0.025	0.000	0.013	300.859	0.818	0.2615756E-01	2.457467	0.4260488E-04	1.761028
07132011	19	0.090	0.003	0.005	0.001	0.000	0.000	0.001	0.000	0.032	0.000	0.017	299.636	0.873	0.6287485E-01	4.368735	0.4521240E-04	1.985098
07132011	20	0.111	0.006	0.005	0.001	0.001	0.000	0.001	0.001	0.042	0.001	0.022	298.686	0.880	0.1446293	5.939677	0.3795304E-04	2.194516
07132011	21	0.084	0.007	0.005	0.001	0.001	0.000	0.001	0.001	0.049	0.001	0.027	298.055	0.882	0.1305462	7.282438	0.6528731E-04	2.047448
07132011	22	0.057	0.005	0.004	0.001	0.001	0.000	0.001	0.001	0.051	0.001	0.028	297.523	0.906	0.1494840	9.953341	0.8669142E-04	2.059993
07132011	23	0.068	0.005	0.004	0.001	0.001	0.000	0.002	0.002	0.052	0.001	0.029	297.299	0.899	0.1660516	9.000454	0.6875552E-04	2.116957
07132011	24	0.083	0.007	0.004	0.001	0.001	0.000	0.002	0.002	0.051	0.001	0.029	296.858	0.928	0.3105094	13.17811	0.5101684E-04	2.412139
07142011	01	0.087	0.008	0.003	0.001	0.002	0.001	0.002	0.003	0.050	0.002	0.029	296.574	0.940	0.4029813	15.04831	0.4000186E-04	2.575408
07142011	02	0.086	0.010	0.004	0.002	0.002	0.001	0.003	0.004	0.047	0.003	0.029	296.474	0.925	0.3511477	12.64359	0.3828009E-04	2.518897
07142011	03	0.079	0.015	0.005	0.002	0.002	0.001	0.003	0.006	0.045	0.003	0.030	296.267	0.939	0.3923585	14.58776	0.3913203E-04	2.571456
07142011	04	0.064	0.017	0.005	0.002	0.002	0.001	0.004	0.006	0.045	0.004	0.030	296.081	0.965	0.6502609	33.72087	0.5487629E-04	2.788514
07142011	05	0.048	0.017	0.005	0.002	0.002	0.001	0.004	0.007	0.044	0.004	0.031	296.019	0.971	0.5756611	32.82824	0.7211965E-04	2.658194
07142011	06	0.045	0.019	0.006	0.002	0.002	0.001	0.004	0.007	0.044	0.004	0.031	296.078	0.974	0.5567873	33.13623	0.7881268E-04	2.623707
07142011	07	0.031	0.018	0.008	0.004	0.002	0.001	0.004	0.006	0.051	0.004	0.032	297.190	0.952	0.2467644	18.78530	0.1015691E-03	2.267057
07142011	08	0.016	0.014	0.014	0.002	0.001	0.001	0.003	0.003	0.059	0.002	0.034	298.570	0.910	0.5967188E-01	11.22455	0.2731276E-03	1.613803
07142011	09	0.016	0.021	0.017	0.000	0.000	0.000	0.001	0.001	0.046	0.001	0.025	299.776	0.875	NaN	8.945214	0.2137520E-02	0.6216806
07142011	10	0.013	0.043	0.012	0.000	0.000	0.000	0.000	0.000	0.020	0.000	0.010	301.225	0.821	0.2665818E-02	1.890359	0.2438306E-03	0.8894561
07142011	11	0.040	0.059	0.013	0.000	0.000	0.000	0.000	0.000	0.005	0.000	0.003	302.877	0.761	0.1099467E-02	0.4341534	0.3115814E-04	1.144072
07142011	12	0.036	0.062	0.029	0.000	0.000	0.000	0.000	0.000	0.022	0.000	0.011	303.672	0.717	0.2509832E-02	1.373283	0.1380739E-03	0.9976485
07142011	13	0.033	0.027	0.027	0.000	0.000	0.000	0.000	0.000	0.040	0.000	0.018	303.883	0.696	0.3653109E-02	2.100350	0.2279980E-03	0.9643607
07142011	14	0.041	0.010	0.023	0.000	0.000	0.000	0.000	0.000	0.048	0.000	0.022	303.936	0.690	0.5103886E-02	2.483070	0.2325441E-03	1.028484
07142011	15	0.029	0.005	0.024	0.000	0.000	0.000	0.000	0.000	0.047	0.000	0.022	303.311	0.716	0.4880428E-02	2.746567	0.3009629E-03	0.9602771
07142011	16	0.019	0.005	0.024	0.000	0.000	0.000	0.000	0.000	0.046	0.000	0.022	302.931	0.730	0.3744423E-02	2.846054	0.4349244E-03	0.8158294
07142011	17	0.024	0.005	0.024	0.000	0.000	0.000	0.000	0.000	0.040	0.000	0.020	302.426	0.737	0.4545510E-02	2.684564	0.3328944E-03	0.9065673
07142011	18	0.029	0.005	0.021	0.000	0.000	0.000	0.000	0.000	0.040	0.000	0.020	302.008	0.735	0.5990624E-02	2.684564	0.2693147E-03	0.9986137
07142011	19	0.023	0.005	0.017	0.000	0.000	0.000	0.000	0.000	0.038	0.000	0.019	301.275	0.744	0.5361974E-02	2.550335	0.3059643E-03	0.9209265
07142011	20	0.013	0.004	0.011	0.000	0.000	0.000	0.000	0.000	0.035	0.000	0.018	300.166	0.772	0.4203618E-02	2.710843	0.4693978E-03	0.7615634
07142011	21	0.003	0.003	0.008	0.000	0.000	0.000	0.000	0.000	0.034	0.000	0.018	299.569	0.764	0.1342654E-02	2.604920	0.1546801E-02	0.2263601
07142011	22	0.013	0.003	0.006	0.000	0.000	0.000	0.000	0.000	0.031	0.000	0.016	298.565	0.829	0.8588493E-02	3.187251	0.3231022E-03	0.9940763
07142011	23	0.005	0.007	0.004	0.000	0.000	0.000	0.000	0.000	0.031	0.000	0.016	297.882	0.885	0.7178247E-02	4.790420	0.6049726E-03	0.8986379
07142011	24	0.003	0.010	0.004	0.000	0.000	0.000	0.000	0.000	0.027	0.000	0.016	297.558	0.889	0.1804370E-01	4.735672	0.6460958E-03	0.8650847
07152011	01	0.015	0.008	0.003	0.000	0.000	0.000	0.000	0.000	0.023	0.000	0.012	296.933	0.944	0.3837323E-01	6.557377	0.1356563E-03	1.684290
07152011	02	0.026	0.006	0.003	0.001	0.000	0.000	0.000	0.000	0.024	0.000	0.012	296.613	0.958	0.1285982	10.20565	0.7127944E-04	2.155876
07152011	03	0.015	0.006	0.003	0.000	0.000	0.000	0.000	0.000	0.020	0.000	0.010	296.296	0.970	0.1096820	11.49425	0.1011629E-03	2.055459
07152011	04	0.008	0.008	0.003	0.000	0.000	0.000	0.000	0.000	0.015	0.000	0.008	296.141	0.972	0.4879397E-01	9.195403	0.1611635E-03	1.756304
07152011	05	0.008	0.010	0.004	0.000	0.000	0.000	0.000	0.000	0.014	0.000	0.008	296.052	0.972	0.4374385E-01	9.195403	0.1837836E-03	1.699264
07152011	06	0.015	0.013	0.007	0.000	0.000	0.000	0.000	0.000	0.017	0.000	0.009	296.033	0.977	0.1824812	17.34368	0.1159100E-03	2.175020
07152011	07	0.016	0.021	0.011	0.000	0.001	0.000	0.001	0.000	0.023	0.001	0.012	296.738	0.962	NaN	17.59932	0.4169970E-03	1.625363
07152011	08	0.002	0.049	0.014	0.000	0.000	0.000	0.000	0.000	0.023	0.000	0.021	297.717	0.923	0.3708124E-02	8.496901	0.4134717E-02	0.3128148
07152011	09	0.001	0.040	0.012	0.000	0.000	0.000	0.000	0.000	0.022	0.000	0.025	297.412	0.918	0.2400219E-02	10.57365	0.7957389E-02	0.1234544
07152011	10	0.001	0.031	0.016	0.000	0.000	0.000	0.000	0.000	0.026	0.000	0.027	297.876	0.909	0.2302706E-02	10.00000	0.7148204E-02	0.1458031
07152011	11	0.001	0.031	0.026	0.000	0.000	0.000	0.000	0.000	0.035	0.000	0.029	298.398	0.877	0.2364039E-02	7.902209	0.4787640E-02	0.2176271
07152011	12	0.002	0.030	0.034	0.000	0.000	0.000	0.000	0.000	0.044	0.000	0.031	298.540	0.865	0.3874719E-02	7.543334	0.3929996E-02	0.2831712
07152011	13	0.002	0.031	0.037	0.000	0.000	0.000	0.000	0.000	0.047	0.000	0.035	299.250	0.854	0.2380192E-02	7.509004	0.4539399E-02	0.2185840
07152011	14	0.002	0.031	0.036	0.000	0.000	0.000	0.000	0.000	0.048	0.000	0.037	298.441	0.846	0.2367556E-02	8.002395	0.5288378E-02	0.1798975
07152011	15	0.003	0.025	0.039	0.000	0.000	0.000	0.000	0.000	0.056	0.000	0.036	299.151	0.823	0.3567040E-02	6.467824	0.3828580E-02	0.2277204
07152011	16	0.003	0.024	0.041	0.000	0.000	0.000	0.000	0.000	0.052	0.000	0.033	298.127	0.827	0.4414141E-02	6.295712	0.3488605E-02	0.2563931
07152011	17	0.001	0.020	0.042	0.000	0.000	0.000	0.000	0.000	0.042	0.000	0.033	298.010	0.833	0.1375794E-02	6.373620	0.4785089E-02	0.1244961
07152011	18	0.001	0.017	0.035	0.000	0.000	0.000	0.000	0.000	0.034	0.000	0.037	297.248	0.845	0.8606911E-03	8.671405	0.9341837E-02	-0.3234284E-01
07152011	19	0.001	0.016	0.030	0.000	0.000	0.000	0.000	0.000	0.047	0.000	0.039	296.837	0.844	0.1698375E-02	8.083175	0.6410115E-02	0.1007162
07152011	20	0.003	0.013	0.024	0.000	0.000	0.000	0.000	0.000	0.062	0.000	0.036	296.546	0.832	0.1088107E-01	6.994410	0.2764124E-02	0.4031936
07152011	21	0.020	0.011	0.020	0.001	0.001	0.001	0.001	0.000	0.061	0.001	0.032	296.224	0.825	0.4390424E-01	6.435081	0.2983686E-03	1.333801
07152011	22	0.029	0.009	0.020	0.001	0.001	0.001	0.001	0.001	0.060	0.002	0.031	295.631	0.827	0.7216877E-01	6.161113	0.1705003E-03	1.557934
07152011	23	0.030	0.009	0.021	0.002	0.001	0.001	0.001	0.001	0.065	0.002	0.034	295.089	0.831	0.8740425E-01	6.812646	0.1833229E-03	1.570099
07152011	24	0.026	0.009	0.020	0.002	0.001	0.001	0.002	0.002	0.074	0.003	0.040	294.597	0.833	0.9657156E-01	7.810646	0.2309743E-03	1.529123
07162011	01	0.024	0.009	0.019	0.002	0.001	0.001	0.002	0.003	0.088	0.003	0.047	294.168	0.829	0.1184150	9.046513	0.2656906E-03	1.532105
07162011	02	0.021	0.010	0.019	0.002	0.001	0.001	0.003	0.004	0.096	0.003	0.053	293.866	0.824	0.1133502	9.488574	0.3402123E-03	1.445451
07162011	03	0.021	0.010	0.018	0.002	0.001	0.001	0.003	0.004	0.098	0.004	0.055	293.585	0.839	0.1291667	11.04476	0.3686098E-03	1.476590
07162011	04	0.023	0.010	0.017	0.002	0.001	0.001	0.003	0.005	0.099	0.004	0.056	293.353	0.859	0.1708016	12.63841	0.3114479E-03	1.608307
07162011	05	0.025	0.011	0.015	0.002	0.001	0.001	0.003	0.005	0.100	0.005	0.056	293.193	0.869	0.2069505	13.66740	0.2711629E-03	1.702455
07162011	06	0.024	0.013	0.016	0.002	0.001	0.001	0.003	0.006	0.102	0.007	0.057	292.985	0.893	0.2529237	16.40031	0.2588986E-03	1.801722
07162011	07	0.021	0.015	0.020	0.002	0.001	0.001	0.004	0.007	0.104	0.008	0.058	293.297	0.905	0.2825834	20.53052	0.2701717E-03	1.880760
07162011	08	0.020	0.017	0.022	0.002	0.001	0.001	0.004	0.007	0.105	0.009	0.058	293.511	0.906	0.2705674	20.64757	0.2805433E-03	1.866869
07162011	09	0.019	0.026	0.025	0.002	0.001	0.001	0.004	0.007	0.105	0.008	0.059	294.319	0.886	0.1839267	16.67225	0.3305625E-03	1.702740
07162011	10	0.010	0.040	0.032	0.002	0.001	0.001	0.003	0.007	0.107	0.006	0.063	295.773	0.843	0.5434620E-01	11.82687	0.8221651E-03	1.157911
07162011	11	0.003	0.057	0.041	0.001	0.001	0.001	0.003	0.006	0.102	0.003	0.068	296.970	0.810	0.000000	10.84818	0.7723911E-02	0.1475196
07162011	12	0.001	0.057	0.043	0.001	0.001	0.001	0.002	0.005	0.082	0.002	0.068	297.761	0.778	0.000000	9.344130	0.9439033E-02	-0.4388617E-02
07162011	13	0.001	0.046	0.041	0.001	0.001	0.001	0.002	0.004	0.075	0.002	0.068	298.403	0.759	0.000000	8.893160	0.8482470E-02	0.2053377E-01
07162011	14	0.001	0.050	0.042	0.001	0.001	0.001	0.002	0.004	0.071	0.001	0.067	299.725	0.718	0.000000	7.454456	0.6556828E-02	0.5572220E-01
07162011	15	0.001	0.066	0.044	0.001	0.001	0.001	0.002	0.004	0.061	0.001	0.063	300.538	0.696	0.000000	6.559453	0.5186764E-02	0.1019712
07162011	16	0.000	0.074	0.042	0.001	0.001	0.001	0.002	0.003	0.053	0.001	0.060	299.644	0.696	0.000000	6.583878	0.5875431E-02	0.4944199E-01
07162011	17	0.001	0.074	0.032	0.001	0.001	0.001	0.002	0.003	0.058	0.001	0.055	300.198	0.682	0.000000	5.270868	0.4608564E-02	0.5831654E-01
07162011	18	0.001	0.061	0.029	0.001	0.001	0.001	0.002	0.004	0.060	0.001	0.051	299.631	0.693	0.000000	4.801154	0.6172427E-02	-0.1091103
07162011	19	0.005	0.035	0.019	0.001	0.001	0.001	0.002	0.004	0.074	0.001	0.048	299.078	0.738	0.000000	5.845041	0.5833101E-02	0.8881491E-03
07162011	20	0.023	0.022	0.012	0.001	0.001	0.001	0.002	0.005	0.080	0.001	0.047	298.149	0.718	0.4244649E-01	5.296189	0.2557081E-03	1.316219
07162011	21	0.036	0.016	0.008	0.002	0.001	0.001	0.002	0.006	0.074	0.001	0.045	297.185	0.770	0.5526096E-01	5.920849	0.2207617E-03	1.428460
07162011	22	0.035	0.016	0.006	0.003	0.001	0.001	0.003	0.007	0.059	0.001	0.039	296.962	0.763	0.4935277E-01	4.669142	0.1642659E-03	1.453690
07162011	23	0.031	0.017	0.005	0.003	0.001	0.001	0.003	0.007	0.050	0.001	0.035	296.304	0.816	0.5713713E-01	5.315262	0.1505249E-03	1.547916
07162011	24	0.029	0.017	0.004	0.003	0.001	0.001	0.002	0.006	0.045	0.001	0.032	296.217	0.819	0.5789655E-01	4.948097	0.1327525E-03	1.571395
07172011	01	0.026	0.019	0.004	0.003	0.001	0.001	0.002	0.006	0.040	0.001	0.028	295.548	0.876	0.7076663E-01	6.073051	0.1203482E-03	1.702967
07172011	02	0.026	0.021	0.004	0.002	0.001	0.001	0.002	0.005	0.036	0.001	0.025	295.349	0.886	0.7572317E-01	6.002131	0.1028919E-03	1.765924
07172011	03	0.029	0.019	0.003	0.002	0.001	0.001	0.002	0.004	0.033	0.001	0.023	295.276	0.883	0.7080036E-01	5.244299	0.9160885E-04	1.757750
07172011	04	0.031	0.018	0.003	0.002	0.001	0.001	0.002	0.005	0.033	0.001	0.023	295.221	0.881	0.7731783E-01	4.984826	0.7493787E-04	1.822949
07172011	05	0.029	0.017	0.003	0.002	0.001	0.001	0.002	0.005	0.036	0.001	0.026	295.220	0.875	0.7538569E-01	5.791121	0.1067992E-03	1.734195
07172011	06	0.026	0.017	0.004	0.002	0.002	0.001	0.003	0.006	0.039	0.001	0.028	295.235	0.873	0.7355601E-01	5.649073	0.1085993E-03	1.716150
07172011	07	0.025	0.018	0.005	0.003	0.002	0.001	0.003	0.007	0.039	0.001	0.029	295.799	0.864	0.5777079E-01	5.272511	0.1204177E-03	1.641327
07172011	08	0.011	0.035	0.009	0.002	0.002	0.001	0.003	0.006	0.038	0.001	0.030	296.997	0.822	0.3836280E-01	4.573771	0.1482269E-03	1.489347
07172011	09	0.001	0.063	0.012	0.002	0.001	0.001	0.001	0.003	0.043	0.001	0.036	298.404	0.759	0.000000	4.481424	0.5417287E-02	-0.8236579E-01
07172011	10	0.001	0.091	0.019	0.001	0.001	0.000	0.001	0.002	0.044	0.001	0.040	299.667	0.697	0.000000	4.101070	0.4255775E-02	-0.1608147E-01
07172011	11	0.001	0.102	0.029	0.001	0.001	0.000	0.001	0.002	0.046	0.001	0.041	300.806	0.643	0.000000	3.329410	0.3442282E-02	-0.1447915E-01
07172011	12	0.001	0.105	0.034	0.000	0.001	0.000	0.001	0.003	0.048	0.000	0.042	301.921	0.594	0.9417534E-04	2.743133	0.3207849E-02	-0.6796706E-01
07172011	13	0.001	0.108	0.036	0.000	0.001	0.001	0.001	0.003	0.053	0.000	0.043	303.100	0.543	0.9638071E-04	2.362977	0.4264297E-02	-0.2563879
07172011	14	0.001	0.101	0.036	0.000	0.001	0.001	0.001	0.003	0.059	0.000	0.045	303.615	0.520	0.9584427E-04	2.274563	0.5644655E-02	-0.3947395
07172011	15	0.003	0.090	0.035	0.000	0.001	0.001	0.001	0.003	0.065	0.000	0.044	302.981	0.521	0.4380345E-03	2.528056	0.7525248E-02	-0.4737341
07172011	16	0.033	0.073	0.029	0.000	0.001	0.001	0.002	0.004	0.073	0.001	0.043	301.259	0.579	NaN	4.063275	0.1473075E-02	0.4406514
07172011	17	0.085	0.057	0.024	0.000	0.001	0.001	0.002	0.007	0.062	0.001	0.040	302.091	0.549	NaN	3.177913	0.1192460E-03	1.425698
07172011	18	0.064	0.059	0.025	0.000	0.001	0.001	0.002	0.007	0.054	0.001	0.037	301.290	0.563	NaN	3.081505	0.1582367E-03	1.289456
07172011	19	0.077	0.046	0.018	0.000	0.001	0.002	0.003	0.010	0.041	0.001	0.034	300.258	0.622	NaN	3.001918	0.6814654E-04	1.643955
07172011	20	0.091	0.035	0.013	0.001	0.002	0.003	0.005	0.016	0.022	0.001	0.032	299.094	0.610	0.2363425E-01	1.554660	0.2081765E-04	1.873204
07172011	21	0.086	0.036	0.010	0.001	0.002	0.004	0.007	0.021	0.006	0.001	0.031	298.060	0.638	0.5664116E-01	1.164057	0.1619874E-05	2.856493
07172011	22	0.069	0.044	0.009	0.001	0.002	0.004	0.008	0.024	0.002	0.002	0.029	297.236	0.681	0.5692416E-01	0.4916496	0.2856533E-06	3.235816
07172011	23	0.059	0.050	0.009	0.001	0.002	0.004	0.008	0.025	0.002	0.001	0.027	296.693	0.707	0.2388984E-01	0.2031434	0.6461880E-07	3.497444
07172011	24	0.050	0.051	0.008	0.001	0.002	0.004	0.008	0.024	0.002	0.002	0.026	296.125	0.753	0.2844459E-01	0.2558069	0.1011023E-06	3.403152
07182011	01	0.041	0.048	0.007	0.002	0.002	0.004	0.007	0.023	0.002	0.002	0.025	295.403	0.818	0.3947848E-01	0.3849054	0.1990879E-06	3.286309
07182011	02	0.040	0.043	0.006	0.002	0.002	0.003	0.007	0.023	0.002	0.002	0.024	294.989	0.850	0.2593082E-01	0.2387671	0.1319358E-06	3.257612
07182011	03	0.035	0.039	0.006	0.002	0.002	0.003	0.007	0.022	0.003	0.003	0.023	294.739	0.865	0.2804917E-01	0.2858705	0.1891799E-06	3.179294
07182011	04	0.031	0.036	0.006	0.002	0.002	0.003	0.007	0.022	0.003	0.003	0.023	294.604	0.871	0.2667588E-01	0.2832349	0.1993345E-06	3.152565
07182011	05	0.032	0.036	0.007	0.002	0.002	0.003	0.007	0.022	0.003	0.003	0.023	294.534	0.876	0.2889162E-01	0.3191800	0.2421715E-06	3.119913
07182011	06	0.034	0.037	0.006	0.002	0.002	0.003	0.007	0.024	0.003	0.003	0.023	294.560	0.878	0.000000	0.8890387E-09	0.1000179E-13	1.948843
07182011	07	0.034	0.036	0.010	0.001	0.002	0.003	0.008	0.026	0.003	0.003	0.023	295.365	0.868	0.000000	0.7980424E-09	0.1000066E-13	1.901997
07182011	08	0.039	0.044	0.027	0.001	0.002	0.003	0.007	0.026	0.005	0.004	0.023	297.040	0.817	0.000000	0.8530890E-09	0.7429360E-19	7.060043
07182011	09	0.043	0.083	0.034	0.001	0.002	0.002	0.005	0.017	0.010	0.005	0.024	298.606	0.756	0.2822948E-01	1.185149	0.4199071E-05	2.450620
07182011	10	0.028	0.191	0.049	0.001	0.002	0.001	0.003	0.010	0.031	0.003	0.028	300.110	0.687	0.7587671E-02	2.087537	0.1474594E-03	1.150962
07182011	11	0.018	0.257	0.068	0.001	0.002	0.001	0.003	0.008	0.051	0.003	0.036	301.270	0.640	0.8247495E-02	2.747151	0.2514858E-03	1.038369
07182011	12	0.019	0.249	0.075	0.000	0.002	0.001	0.002	0.007	0.065	0.003	0.042	302.507	0.598	NaN	3.763076	0.5229311E-01	-1.142901
07182011	13	0.007	0.187	0.063	0.000	0.001	0.001	0.002	0.006	0.083	0.002	0.055	303.191	0.575	0.4589021E-02	3.793742	0.7352640E-02	-0.2873755
07182011	14	0.003	0.129	0.047	0.000	0.001	0.001	0.002	0.005	0.091	0.001	0.064	303.440	0.565	0.4715323E-03	3.930286	0.9704534E-02	-0.3925505
07182011	15	0.003	0.079	0.035	0.000	0.001	0.001	0.002	0.004	0.097	0.001	0.064	303.312	0.566	0.8738637E-03	4.271729	0.9592483E-02	-0.3513273
07182011	16	0.008	0.039	0.022	0.000	0.001	0.001	0.001	0.003	0.103	0.001	0.058	303.189	0.571	NaN	4.485327	0.1290056E-01	-0.4588143
07182011	17	0.008	0.023	0.016	0.000	0.001	0.000	0.001	0.003	0.092	0.001	0.049	302.957	0.578	NaN	3.940538	0.5959199E-02	-0.1796324
07182011	18	0.006	0.020	0.015	0.000	0.001	0.000	0.001	0.002	0.079	0.000	0.044	302.718	0.582	NaN	3.430689	0.9223860E-02	-0.4295314
07182011	19	0.012	0.020	0.015	0.000	0.001	0.000	0.001	0.002	0.081	0.001	0.044	302.073	0.588	NaN	3.757010	0.4813625E-02	-0.1076299
07182011	20	0.049	0.019	0.014	0.000	0.001	0.000	0.002	0.002	0.078	0.001	0.042	300.244	0.643	NaN	4.446948	0.3119629E-03	1.153959
07182011	21	0.078	0.015	0.010	0.001	0.001	0.000	0.002	0.002	0.073	0.001	0.039	298.700	0.701	0.5899870E-01	4.328148	0.1366307E-03	1.500754
07182011	22	0.076	0.013	0.008	0.002	0.001	0.001	0.002	0.003	0.074	0.001	0.040	297.947	0.704	0.6345350E-01	4.388867	0.1231178E-03	1.552032
07182011	23	0.071	0.012	0.006	0.002	0.001	0.001	0.002	0.003	0.071	0.001	0.040	297.074	0.766	0.9396309E-01	5.655902	0.1131614E-03	1.698804
07182011	24	0.072	0.013	0.006	0.003	0.001	0.001	0.003	0.004	0.067	0.001	0.039	296.860	0.765	0.9812969E-01	5.351762	0.1002929E-03	1.727226
07192011	01	0.069	0.015	0.006	0.003	0.002	0.001	0.003	0.004	0.063	0.001	0.037	296.173	0.830	0.1482409	6.727393	0.8063753E-04	1.921310
07192011	02	0.061	0.017	0.006	0.003	0.002	0.001	0.003	0.004	0.062	0.002	0.037	295.891	0.846	0.1598229	7.581094	0.8650100E-04	1.942711
07192011	03	0.053	0.018	0.006	0.002	0.002	0.001	0.003	0.004	0.061	0.002	0.037	295.580	0.869	0.1734892	8.664780	0.9420548E-04	1.963681
07192011	04	0.048	0.019	0.007	0.002	0.002	0.001	0.003	0.004	0.061	0.002	0.037	295.473	0.862	0.1506694	8.076303	0.1055141E-03	1.883902
07192011	05	0.047	0.020	0.008	0.002	0.002	0.001	0.003	0.005	0.061	0.002	0.037	295.267	0.884	0.1837578	9.145205	0.9400680E-04	1.988034
07192011	06	0.056	0.021	0.008	0.002	0.002	0.001	0.004	0.005	0.062	0.003	0.038	295.164	0.906	0.2966082	12.87404	0.7523892E-04	2.233272
07192011	07	0.065	0.023	0.011	0.002	0.002	0.001	0.004	0.005	0.065	0.005	0.038	296.361	0.886	0.2299139	10.64810	0.7207254E-04	2.169502
07192011	08	0.050	0.027	0.020	0.001	0.002	0.001	0.003	0.004	0.068	0.004	0.039	297.885	0.860	0.1074879	8.721440	0.1250513E-03	1.843500
07192011	09	0.025	0.037	0.028	0.001	0.002	0.001	0.002	0.003	0.072	0.002	0.040	299.663	0.807	0.2962124E-01	6.706137	0.3180045E-03	1.324039
07192011	10	0.010	0.042	0.029	0.000	0.001	0.000	0.001	0.002	0.071	0.001	0.039	301.470	0.735	NaN	5.539384	0.1404803E-01	-0.4041538
07192011	11	0.004	0.050	0.031	0.000	0.001	0.000	0.001	0.001	0.065	0.000	0.039	303.146	0.663	0.2811313E-02	3.743786	0.6617605E-02	-0.2473898
07192011	12	0.005	0.045	0.030	0.000	0.001	0.000	0.001	0.001	0.066	0.000	0.038	304.324	0.626	0.8463562E-02	3.431920	0.6617344E-02	-0.2851466
07192011	13	0.011	0.038	0.027	0.000	0.001	0.000	0.001	0.001	0.072	0.001	0.038	305.533	0.586	NaN	3.406205	0.1170185E-01	-0.5359839
07192011	14	0.025	0.033	0.025	0.000	0.000	0.000	0.001	0.001	0.072	0.001	0.037	306.043	0.570	NaN	3.442012	0.2400352E-02	0.1565374
07192011	15	0.048	0.022	0.021	0.000	0.000	0.000	0.001	0.001	0.072	0.000	0.038	305.097	0.591	NaN	3.728129	0.4693202E-03	0.9000217
07192011	16	0.095	0.009	0.014	0.000	0.000	0.000	0.001	0.001	0.068	0.000	0.035	304.612	0.606	NaN	3.484202	0.1512217E-03	1.362489
07192011	17	0.090	0.005	0.012	0.000	0.000	0.000	0.001	0.001	0.061	0.000	0.032	304.201	0.609	NaN	3.146465	0.1438419E-03	1.339937
07192011	18	0.078	0.004	0.010	0.000	0.000	0.000	0.001	0.001	0.056	0.000	0.029	303.695	0.601	NaN	2.719601	0.1458935E-03	1.270469
07192011	19	0.088	0.003	0.007	0.000	0.000	0.000	0.001	0.001	0.048	0.000	0.025	302.385	0.646	NaN	2.668607	0.9936808E-04	1.429038
07192011	20	0.082	0.003	0.006	0.000	0.000	0.000	0.001	0.001	0.040	0.000	0.021	300.860	0.695	NaN	2.647616	0.7630885E-04	1.540280
07192011	21	0.044	0.002	0.004	0.000	0.000	0.000	0.001	0.001	0.035	0.000	0.019	299.935	0.711	NaN	2.377224	0.1286393E-03	1.266696
07192011	22	0.029	0.002	0.003	0.001	0.000	0.000	0.001	0.001	0.031	0.000	0.016	299.340	0.739	0.3028595E-01	2.001497	0.4154429E-04	1.682843
07192011	23	0.032	0.002	0.003	0.001	0.000	0.000	0.001	0.001	0.028	0.000	0.015	299.047	0.749	0.2951235E-01	1.938362	0.4015549E-04	1.683690
07192011	24	0.043	0.003	0.003	0.001	0.000	0.000	0.001	0.001	0.026	0.000	0.014	298.687	0.777	0.3145272E-01	2.030074	0.4196271E-04	1.684648
07202011	01	0.059	0.005	0.004	0.001	0.000	0.000	0.001	0.001	0.029	0.000	0.016	298.386	0.809	0.3499782E-01	2.687028	0.5735220E-04	1.670722
07202011	02	0.078	0.007	0.005	0.001	0.001	0.000	0.002	0.002	0.033	0.000	0.019	298.095	0.837	0.6264561E-01	3.604703	0.4485817E-04	1.905028
07202011	03	0.096	0.010	0.005	0.001	0.001	0.000	0.002	0.003	0.036	0.001	0.022	297.905	0.852	0.9397244E-01	4.310292	0.3997922E-04	2.032672
07202011	04	0.118	0.011	0.005	0.002	0.001	0.001	0.003	0.004	0.039	0.001	0.025	297.731	0.864	0.1463971	5.158913	0.2938123E-04	2.244488
07202011	05	0.134	0.012	0.005	0.002	0.002	0.001	0.003	0.005	0.042	0.002	0.028	297.573	0.876	0.2169784	6.656822	0.2696996E-04	2.392387
07202011	06	0.126	0.013	0.006	0.002	0.002	0.001	0.004	0.006	0.044	0.002	0.030	297.488	0.889	0.2422034	7.620379	0.2799752E-04	2.434857
07202011	07	0.055	0.007	0.005	0.003	0.002	0.001	0.003	0.005	0.050	0.001	0.031	298.491	0.877	0.1035995	7.255025	0.7612802E-04	1.979094
07202011	08	0.015	0.003	0.005	0.001	0.001	0.001	0.002	0.003	0.047	0.001	0.027	299.419	0.870	0.5438906E-01	6.143601	0.1004453E-03	1.786493
07202011	09	0.005	0.007	0.009	0.000	0.001	0.000	0.001	0.001	0.036	0.000	0.026	300.175	0.850	0.5187154E-02	5.415813	0.4674557E-02	0.6392323E-01
07202011	10	0.001	0.011	0.012	0.000	0.000	0.000	0.001	0.001	0.032	0.000	0.029	301.250	0.822	0.6907582E-03	5.193309	0.4726863E-02	0.4087113E-01
07202011	11	0.004	0.008	0.012	0.000	0.000	0.000	0.001	0.001	0.047	0.000	0.029	302.368	0.775	0.5374849E-02	4.278400	0.5345750E-02	-0.9672724E-01
07202011	12	0.004	0.005	0.013	0.000	0.000	0.000	0.001	0.001	0.059	0.000	0.031	303.025	0.745	NaN	4.310947	0.5850343E-02	-0.1326087
07202011	13	0.012	0.003	0.011	0.000	0.000	0.000	0.001	0.001	0.061	0.000	0.031	303.671	0.720	NaN	4.171879	0.1639045E-02	0.4057408
07202011	14	0.025	0.002	0.009	0.000	0.000	0.000	0.000	0.001	0.054	0.000	0.028	303.697	0.718	NaN	3.837218	0.5812335E-03	0.8196659
07202011	15	0.034	0.001	0.007	0.000	0.000	0.000	0.000	0.000	0.046	0.000	0.023	303.101	0.735	0.6328762E-02	3.087248	0.2831843E-03	1.037502
07202011	16	0.038	0.001	0.006	0.000	0.000	0.000	0.000	0.000	0.037	0.000	0.019	302.276	0.760	0.7594943E-02	2.749638	0.1980495E-03	1.142502
07202011	17	0.049	0.001	0.005	0.000	0.000	0.000	0.000	0.000	0.033	0.000	0.017	300.898	0.783	0.1337719E-01	2.668760	0.1202990E-03	1.346048
07202011	18	0.059	0.001	0.005	0.000	0.000	0.000	0.000	0.000	0.036	0.000	0.019	299.794	0.826	0.3111213E-01	3.784860	0.9432813E-04	1.603409
07202011	19	0.024	0.002	0.001	0.000	0.000	0.000	0.000	0.000	0.001	0.000	0.001	298.492	0.868	0.1388073E-02	0.2557545	0.9926936E-05	1.411008
07202011	20	0.038	0.002	0.002	0.000	0.000	0.000	0.000	0.000	0.002	0.000	0.001	297.394	0.905	0.4368782E-02	0.3636364	0.4880617E-05	1.872193
07202011	21	0.052	0.003	0.002	0.000	0.000	0.000	0.000	0.000	0.003	0.000	0.002	296.868	0.928	0.1873493E-01	0.9394221	0.6517955E-05	2.158749
07202011	22	0.076	0.004	0.003	0.000	0.000	0.000	0.001	0.000	0.004	0.000	0.002	296.605	0.943	NaN	2.423688	0.5381421E-05	2.653580
07202011	23	0.085	0.005	0.005	0.000	0.000	0.000	0.001	0.000	0.005	0.001	0.003	296.486	0.951	NaN	5.278986	0.1031626E-04	2.709028
07202011	24	0.087	0.005	0.006	0.000	0.000	0.000	0.001	0.000	0.007	0.001	0.004	296.395	0.958	NaN	8.291059	0.1382858E-04	2.777833
07212011	01	0.082	0.005	0.006	0.000	0.000	0.000	0.001	0.000	0.008	0.001	0.005	296.288	0.964	NaN	9.123766	0.1643090E-04	2.744513
07212011	02	0.075	0.004	0.006	0.000	0.000	0.000	0.001	0.000	0.009	0.001	0.005	296.221	0.965	NaN	12.48266	0.1968544E-04	2.802162
07212011	03	0.070	0.004	0.006	0.000	0.000	0.000	0.001	0.000	0.011	0.001	0.006	296.220	0.961	NaN	9.951230	0.2118250E-04	2.671900
07212011	04	0.072	0.004	0.007	0.000	0.000	0.000	0.001	0.000	0.013	0.002	0.007	296.231	0.961	NaN	12.19896	0.2622622E-04	2.667587
07212011	05	0.084	0.005	0.007	0.000	0.001	0.000	0.002	0.000	0.015	0.002	0.008	296.293	0.954	NaN	10.22039	0.1977555E-04	2.713339
07212011	06	0.106	0.006	0.008	0.001	0.001	0.000	0.002	0.000	0.018	0.004	0.009	296.411	0.949	0.3544536	8.418571	0.1279070E-04	2.818344
07212011	07	0.139	0.008	0.010	0.001	0.001	0.000	0.002	0.000	0.022	0.006	0.010	297.586	0.935	0.3199097	7.829390	0.1186479E-04	2.819468
07212011	08	0.110	0.005	0.015	0.002	0.001	0.000	0.002	0.001	0.027	0.004	0.013	299.138	0.889	0.9216052E-01	3.960460	0.1940267E-04	2.309884
07212011	09	0.042	0.005	0.015	0.000	0.000	0.000	0.001	0.001	0.039	0.001	0.020	299.886	0.869	NaN	7.560589	0.1564833E-03	1.684088
07212011	10	0.022	0.019	0.018	0.000	0.000	0.000	0.000	0.001	0.047	0.001	0.025	300.637	0.837	NaN	7.151412	0.1211837E-02	0.7709476
07212011	11	0.053	0.015	0.016	0.000	0.000	0.000	0.000	0.001	0.047	0.001	0.024	301.301	0.810	NaN	5.895521	0.1635757E-03	1.556803
07212011	12	0.053	0.012	0.014	0.000	0.000	0.000	0.000	0.001	0.037	0.000	0.019	302.872	0.781	NaN	4.015211	0.1309102E-03	1.486735
07212011	13	0.005	0.012	0.016	0.000	0.000	0.000	0.000	0.000	0.036	0.000	0.020	303.474	0.761	0.7670522E-03	2.894356	0.1851807E-02	0.1939563
07212011	14	0.006	0.004	0.010	0.000	0.000	0.000	0.000	0.000	0.035	0.000	0.018	303.451	0.756	0.1059055E-02	2.604920	0.1086432E-02	0.3797920
07212011	15	0.010	0.001	0.007	0.000	0.000	0.000	0.000	0.000	0.031	0.000	0.016	303.019	0.757	0.1480639E-02	2.315485	0.6531603E-03	0.5496222
07212011	16	0.011	0.001	0.006	0.000	0.000	0.000	0.000	0.000	0.028	0.000	0.014	302.646	0.758	0.1630902E-02	2.026049	0.4802228E-03	0.6252072
07212011	17	0.010	0.001	0.005	0.000	0.000	0.000	0.000	0.000	0.025	0.000	0.013	302.061	0.764	0.1441300E-02	1.881331	0.5141323E-03	0.5633904
07212011	18	0.010	0.002	0.005	0.000	0.000	0.000	0.000	0.000	0.024	0.000	0.012	301.414	0.767	0.1763701E-02	1.807229	0.4118697E-03	0.6422534
07212011	19	0.013	0.003	0.006	0.000	0.000	0.000	0.000	0.000	0.023	0.000	0.012	300.305	0.777	0.2814412E-02	1.883831	0.3183660E-03	0.7721152
07212011	20	0.050	0.004	0.006	0.000	0.000	0.000	0.001	0.000	0.025	0.000	0.013	299.167	0.812	NaN	2.946754	0.6550488E-04	1.653070
07212011	21	0.086	0.007	0.007	0.000	0.000	0.000	0.001	0.000	0.027	0.000	0.014	298.648	0.835	NaN	3.864945	0.3565996E-04	2.034963
07212011	22	0.099	0.012	0.010	0.000	0.000	0.000	0.001	0.000	0.031	0.001	0.016	298.329	0.850	NaN	5.155013	0.3633061E-04	2.151957
07212011	23	0.121	0.015	0.012	0.000	0.000	0.000	0.001	0.000	0.035	0.001	0.017	298.063	0.868	NaN	6.598750	0.3108896E-04	2.326855
07212011	24	0.154	0.014	0.011	0.001	0.000	0.000	0.001	0.000	0.035	0.002	0.017	297.721	0.896	0.2225945	6.281531	0.2038117E-04	2.488837
07222011	01	0.125	0.009	0.008	0.003	0.000	0.000	0.001	0.000	0.028	0.002	0.012	297.285	0.928	0.2460112	6.686310	0.1534504E-04	2.639218
07222011	02	0.079	0.004	0.004	0.003	0.000	0.000	0.001	0.000	0.021	0.001	0.009	296.948	0.940	0.1638855	5.391355	0.1649483E-04	2.514350
07222011	03	0.057	0.003	0.003	0.001	0.000	0.000	0.001	0.000	0.013	0.000	0.006	296.664	0.952	0.1139922	4.162755	0.1412759E-04	2.469313
07222011	04	0.045	0.002	0.003	0.001	0.000	0.000	0.001	0.000	0.009	0.000	0.005	296.496	0.952	0.7824188E-01	3.427232	0.1478860E-04	2.365016
07222011	05	0.037	0.003	0.004	0.001	0.000	0.000	0.001	0.000	0.008	0.000	0.004	296.454	0.941	0.4205424E-01	2.240487	0.1355161E-04	2.218352
07222011	06	0.029	0.004	0.005	0.000	0.000	0.000	0.001	0.000	0.008	0.000	0.004	296.428	0.939	NaN	4.371346	0.3190654E-04	2.136735
07222011	07	0.029	0.006	0.008	0.000	0.000	0.000	0.001	0.000	0.010	0.000	0.006	297.355	0.937	NaN	6.750572	0.6873217E-04	1.992180
07222011	08	0.022	0.013	0.014	0.000	0.000	0.000	0.001	0.000	0.016	0.000	0.009	298.917	0.908	NaN	6.895506	0.2818902E-03	1.388486
07222011	09	0.003	0.071	0.018	0.000	0.000	0.000	0.001	0.000	0.029	0.000	0.019	300.350	0.854	0.4178822E-02	4.111672	0.3978397E-02	0.1431035E-01
07222011	10	0.003	0.120	0.020	0.000	0.001	0.000	0.000	0.000	0.036	0.000	0.023	301.888	0.773	0.000000	3.321420	0.4722620E-02	-0.1528592
07222011	11	0.002	0.135	0.020	0.000	0.000	0.000	0.000	0.000	0.036	0.000	0.027	302.497	0.721	0.3093481E-03	3.035052	0.2642463E-02	0.6015729E-01
07222011	12	0.005	0.066	0.014	0.000	0.000	0.000	0.000	0.000	0.052	0.000	0.030	303.209	0.692	0.3940582E-02	3.295888	0.1188862E-02	0.4428410
07222011	13	0.035	0.027	0.010	0.000	0.000	0.000	0.000	0.000	0.056	0.000	0.028	303.895	0.663	0.4456460E-02	2.871795	0.3923988E-03	0.8644257
07222011	14	0.074	0.010	0.008	0.000	0.000	0.000	0.000	0.000	0.048	0.000	0.024	304.059	0.656	0.7701039E-02	2.461539	0.1613894E-03	1.183332
07222011	15	0.083	0.005	0.007	0.000	0.000	0.000	0.000	0.000	0.038	0.000	0.019	303.752	0.670	0.7688940E-02	2.010582	0.1104433E-03	1.260182
07222011	16	0.081	0.003	0.006	0.000	0.000	0.000	0.000	0.000	0.030	0.000	0.015	303.251	0.690	0.7311881E-02	1.693002	0.8444652E-04	1.302076
07222011	17	0.072	0.002	0.006	0.000	0.000	0.000	0.000	0.000	0.025	0.000	0.013	302.769	0.712	0.6833851E-02	1.568154	0.7887119E-04	1.298470
07222011	18	0.064	0.003	0.005	0.000	0.000	0.000	0.000	0.000	0.021	0.000	0.011	302.216	0.767	0.7998645E-02	1.656626	0.6600303E-04	1.399661
07222011	19	0.052	0.004	0.004	0.000	0.000	0.000	0.001	0.000	0.018	0.000	0.010	301.593	0.770	NaN	1.810450	0.5707583E-04	1.501334
07222011	20	0.045	0.003	0.003	0.000	0.000	0.000	0.001	0.000	0.016	0.000	0.009	300.194	0.787	NaN	1.729823	0.5334963E-04	1.510870
07222011	21	0.039	0.003	0.003	0.000	0.000	0.000	0.001	0.000	0.014	0.000	0.008	299.542	0.781	NaN	1.494923	0.5201287E-04	1.458508
07222011	22	0.041	0.002	0.003	0.000	0.000	0.000	0.001	0.000	0.013	0.000	0.007	299.019	0.791	NaN	1.406155	0.3875616E-04	1.559692
07222011	23	0.042	0.004	0.003	0.000	0.000	0.000	0.001	0.000	0.013	0.000	0.007	298.328	0.843	NaN	1.852937	0.3434350E-04	1.732016
07222011	24	0.038	0.008	0.003	0.000	0.000	0.000	0.001	0.000	0.010	0.000	0.006	297.828	0.886	NaN	2.411622	0.3114788E-04	1.888881
07232011	01	0.044	0.005	0.003	0.000	0.000	0.000	0.001	0.000	0.011	0.000	0.006	297.314	0.929	NaN	3.886770	0.2447631E-04	2.200843
07232011	02	0.051	0.004	0.003	0.000	0.000	0.000	0.001	0.000	0.013	0.000	0.007	297.040	0.935	NaN	5.121681	0.2377864E-04	2.333225
07232011	03	0.055	0.005	0.002	0.000	0.001	0.000	0.001	0.000	0.016	0.000	0.009	296.819	0.945	NaN	7.002577	0.2496620E-04	2.447905
07232011	04	0.049	0.005	0.002	0.000	0.001	0.000	0.001	0.000	0.018	0.000	0.010	296.631	0.948	NaN	7.651886	0.3089447E-04	2.393888
07232011	05	0.047	0.006	0.002	0.000	0.001	0.000	0.001	0.000	0.018	0.000	0.010	296.502	0.949	NaN	7.649909	0.3191832E-04	2.379616
07232011	06	0.044	0.008	0.003	0.000	0.001	0.000	0.002	0.000	0.015	0.000	0.009	296.432	0.950	NaN	7.539223	0.3038924E-04	2.394607
07232011	07	0.041	0.011	0.004	0.001	0.001	0.000	0.002	0.000	0.014	0.000	0.008	297.185	0.927	0.6410837E-01	3.793380	0.2471824E-04	2.186009
07232011	08	0.038	0.035	0.009	0.000	0.001	0.000	0.001	0.000	0.014	0.000	0.008	298.350	0.897	NaN	4.771484	0.5593916E-04	1.930938
07232011	09	0.025	0.101	0.021	0.000	0.001	0.000	0.001	0.001	0.021	0.001	0.012	299.743	0.839	NaN	5.076367	0.5100709E-03	0.9979225
07232011	10	0.003	0.109	0.025	0.000	0.000	0.000	0.000	0.001	0.039	0.000	0.023	301.161	0.775	0.6604552E-02	3.400458	0.4507182E-02	-0.1223677
07232011	11	0.002	0.071	0.024	0.000	0.000	0.000	0.000	0.001	0.042	0.000	0.032	302.557	0.715	0.3654957E-03	3.476553	0.4815928E-02	-0.1415311
07232011	12	0.003	0.044	0.021	0.000	0.000	0.000	0.000	0.001	0.053	0.000	0.034	303.394	0.670	0.7445216E-03	3.187256	0.6338457E-02	-0.2985666
07232011	13	0.013	0.035	0.019	0.000	0.000	0.000	0.000	0.001	0.064	0.000	0.033	304.426	0.633	NaN	3.412042	0.4683955E-02	-0.1375983
07232011	14	0.031	0.035	0.018	0.000	0.000	0.000	0.000	0.001	0.061	0.000	0.032	304.937	0.612	NaN	3.329962	0.8022920E-03	0.6181068
07232011	15	0.052	0.021	0.014	0.000	0.000	0.000	0.000	0.001	0.050	0.000	0.027	303.798	0.639	NaN	3.076098	0.2382391E-03	1.110987
07232011	16	0.076	0.007	0.008	0.000	0.000	0.000	0.000	0.001	0.036	0.000	0.019	303.099	0.668	NaN	2.284410	0.8847340E-04	1.411961
07232011	17	0.080	0.003	0.005	0.000	0.000	0.000	0.000	0.001	0.027	0.000	0.015	302.326	0.705	NaN	1.975781	0.6224838E-04	1.501611
07232011	18	0.084	0.004	0.004	0.001	0.000	0.000	0.001	0.001	0.024	0.000	0.013	301.537	0.769	0.2040070E-01	1.796361	0.3089761E-04	1.764469
07232011	19	0.075	0.005	0.003	0.001	0.000	0.000	0.001	0.001	0.022	0.000	0.013	300.692	0.796	0.2680820E-01	2.047631	0.3043282E-04	1.827909
07232011	20	0.053	0.005	0.002	0.001	0.000	0.000	0.001	0.002	0.020	0.000	0.013	299.356	0.801	0.3157520E-01	1.876104	0.2640250E-04	1.851612
07232011	21	0.039	0.006	0.002	0.001	0.000	0.000	0.001	0.002	0.017	0.000	0.012	298.323	0.842	0.3541321E-01	2.098381	0.2843978E-04	1.867958
07232011	22	0.041	0.008	0.002	0.001	0.000	0.000	0.001	0.003	0.014	0.000	0.011	297.880	0.871	0.3272653E-01	2.034168	0.2418133E-04	1.924906
07232011	23	0.057	0.005	0.002	0.001	0.000	0.001	0.001	0.004	0.010	0.000	0.010	297.601	0.873	0.2758759E-01	1.543872	0.1294061E-04	2.076657
07232011	24	0.071	0.004	0.002	0.001	0.001	0.001	0.002	0.005	0.006	0.000	0.010	297.395	0.888	0.5008036E-01	1.508747	0.4967967E-05	2.482438
07242011	01	0.058	0.003	0.002	0.001	0.001	0.001	0.002	0.005	0.004	0.000	0.009	296.820	0.926	0.8720130E-01	1.870308	0.3405518E-05	2.739730
07242011	02	0.059	0.003	0.002	0.001	0.001	0.001	0.002	0.005	0.004	0.000	0.009	296.519	0.943	0.1162435	2.205483	0.3391454E-05	2.813118
07242011	03	0.063	0.004	0.002	0.001	0.001	0.001	0.002	0.004	0.005	0.000	0.009	296.411	0.945	0.1584092	3.358243	0.5581055E-05	2.779396
07242011	04	0.071	0.007	0.002	0.001	0.001	0.001	0.002	0.003	0.009	0.001	0.010	296.337	0.947	0.2024831	4.851109	0.9213857E-05	2.721400
07242011	05	0.092	0.011	0.003	0.001	0.001	0.001	0.002	0.003	0.013	0.001	0.011	296.338	0.947	0.2764288	5.823434	0.8864336E-05	2.817533
07242011	06	0.098	0.012	0.003	0.001	0.001	0.001	0.002	0.003	0.016	0.001	0.013	296.392	0.950	0.3165608	7.247433	0.1153516E-04	2.798161
07242011	07	0.085	0.013	0.005	0.001	0.001	0.001	0.002	0.003	0.025	0.002	0.016	297.273	0.935	0.2388576	7.770950	0.1937491E-04	2.603234
07242011	08	0.050	0.040	0.012	0.001	0.001	0.000	0.001	0.002	0.037	0.002	0.021	298.634	0.899	0.8102846E-01	6.449338	0.7230174E-04	1.950366
07242011	09	0.004	0.078	0.019	0.000	0.000	0.000	0.001	0.001	0.040	0.000	0.028	299.942	0.842	0.3850043E-02	5.444724	0.4974210E-02	0.3925171E-01
07242011	10	0.001	0.066	0.020	0.000	0.000	0.000	0.000	0.001	0.039	0.000	0.036	300.875	0.781	0.4048347E-03	5.373789	0.5172736E-02	0.1656033E-01
07242011	11	0.001	0.035	0.017	0.000	0.000	0.000	0.000	0.000	0.040	0.000	0.036	301.552	0.749	0.2729297E-03	4.834400	0.3570319E-02	0.1316355
07242011	12	0.001	0.017	0.014	0.000	0.000	0.000	0.000	0.000	0.045	0.000	0.036	302.165	0.724	0.2961755E-03	4.149253	0.3086528E-02	0.1284997
07242011	13	0.002	0.009	0.012	0.000	0.000	0.000	0.000	0.000	0.046	0.000	0.034	302.718	0.706	0.3519654E-03	3.671700	0.3253784E-02	0.5247841E-01
07242011	14	0.002	0.005	0.010	0.000	0.000	0.000	0.000	0.000	0.044	0.000	0.032	302.927	0.700	0.3146529E-03	3.299253	0.3097793E-02	0.2736324E-01
07242011	15	0.002	0.003	0.009	0.000	0.000	0.000	0.000	0.000	0.040	0.000	0.030	302.665	0.707	0.3017783E-03	3.247071	0.2836715E-02	0.5867611E-01
07242011	16	0.002	0.002	0.009	0.000	0.000	0.000	0.000	0.000	0.038	0.000	0.027	302.241	0.723	0.3820062E-03	2.991116	0.2923498E-02	0.9930444E-02
07242011	17	0.003	0.001	0.007	0.000	0.000	0.000	0.000	0.000	0.041	0.000	0.025	301.538	0.760	0.2125144E-02	3.456135	0.1943480E-02	0.2500105
07242011	18	0.007	0.002	0.005	0.000	0.000	0.000	0.000	0.000	0.045	0.000	0.023	300.915	0.802	0.3442585E-02	3.945112	0.9560937E-03	0.6155588
07242011	19	0.014	0.002	0.005	0.000	0.000	0.000	0.000	0.000	0.047	0.000	0.024	300.144	0.786	0.6972015E-02	3.934426	0.5469618E-03	0.8569244
07242011	20	0.035	0.003	0.005	0.000	0.000	0.000	0.001	0.000	0.051	0.000	0.026	299.045	0.786	NaN	4.664680	0.2186022E-03	1.329167
07242011	21	0.061	0.004	0.005	0.001	0.000	0.000	0.001	0.000	0.054	0.000	0.028	298.644	0.796	0.5656445E-01	4.792057	0.1191880E-03	1.604289
07242011	22	0.095	0.005	0.006	0.001	0.001	0.000	0.001	0.000	0.058	0.000	0.030	298.346	0.812	0.9874016E-01	5.444804	0.7884328E-04	1.839218
07242011	23	0.119	0.006	0.006	0.001	0.001	0.000	0.001	0.000	0.061	0.001	0.031	298.064	0.830	0.1419623	6.286638	0.6161156E-04	2.008756
07242011	24	0.132	0.007	0.006	0.001	0.001	0.000	0.001	0.000	0.062	0.001	0.032	297.712	0.858	0.2103426	7.861534	0.5147586E-04	2.183904
07252011	01	0.142	0.008	0.006	0.000	0.001	0.000	0.001	0.000	0.063	0.002	0.032	297.346	0.890	NaN	11.28135	0.4347970E-04	2.414074
07252011	02	0.170	0.009	0.005	0.001	0.001	0.000	0.001	0.000	0.064	0.003	0.032	297.049	0.912	0.4304905	12.63422	0.3230188E-04	2.592320
07252011	03	0.207	0.011	0.005	0.001	0.001	0.000	0.002	0.000	0.066	0.005	0.032	296.844	0.925	0.6035997	17.35798	0.2464418E-04	2.847785
07252011	04	0.216	0.014	0.005	0.001	0.001	0.000	0.002	0.000	0.068	0.007	0.032	296.738	0.929	0.6289290	17.94053	0.2358174E-04	2.881259
07252011	05	0.211	0.018	0.006	0.001	0.001	0.000	0.002	0.000	0.072	0.009	0.033	296.674	0.927	0.6436987	19.20547	0.2513910E-04	2.883075
07252011	06	0.200	0.023	0.008	0.001	0.001	0.000	0.002	0.001	0.076	0.013	0.033	296.637	0.931	0.6511440	20.25197	0.2621588E-04	2.887903
07252011	07	0.175	0.028	0.011	0.002	0.002	0.000	0.002	0.001	0.080	0.018	0.034	297.129	0.931	0.6209689	22.52820	0.3301681E-04	2.833991
07252011	08	0.069	0.043	0.029	0.001	0.001	0.000	0.002	0.001	0.074	0.010	0.034	298.476	0.897	0.2035514	12.69345	0.8645146E-04	2.166807
07252011	09	0.004	0.071	0.047	0.000	0.001	0.000	0.001	0.001	0.048	0.001	0.033	299.248	0.878	0.8452415E-02	8.539660	0.5664639E-02	0.1782684
07252011	10	0.003	0.044	0.034	0.000	0.000	0.000	0.001	0.001	0.048	0.000	0.032	300.065	0.846	0.5118966E-02	6.668805	0.5532319E-02	0.8114076E-01
07252011	11	0.003	0.023	0.027	0.000	0.000	0.000	0.001	0.001	0.051	0.000	0.033	300.866	0.798	0.3365815E-02	5.247827	0.5693317E-02	-0.3538590E-01
07252011	12	0.003	0.008	0.018	0.000	0.000	0.000	0.000	0.000	0.045	0.000	0.029	301.799	0.785	0.1906931E-02	4.496558	0.2671142E-02	0.2261832
07252011	13	0.008	0.002	0.012	0.000	0.000	0.000	0.000	0.000	0.042	0.000	0.023	301.781	0.773	0.1937866E-02	3.463856	0.1306270E-02	0.4235269
07252011	14	0.029	0.001	0.009	0.000	0.000	0.000	0.000	0.000	0.036	0.000	0.018	302.193	0.779	0.6485879E-02	2.825746	0.2294067E-03	1.090527
07252011	15	0.031	0.001	0.007	0.000	0.000	0.000	0.000	0.000	0.026	0.000	0.013	301.780	0.787	0.5812645E-02	2.131148	0.1487292E-03	1.156217
07252011	16	0.034	0.001	0.005	0.000	0.000	0.000	0.000	0.000	0.021	0.000	0.011	301.305	0.799	0.6195188E-02	1.886793	0.1123709E-03	1.225070
07252011	17	0.037	0.001	0.005	0.000	0.000	0.000	0.000	0.000	0.018	0.000	0.009	300.629	0.804	0.6596625E-02	1.543739	0.7829992E-04	1.294813
07252011	18	0.040	0.001	0.005	0.000	0.000	0.000	0.000	0.000	0.018	0.000	0.009	300.275	0.805	0.8236766E-02	1.618705	0.6914292E-04	1.369420
07252011	19	0.041	0.001	0.006	0.000	0.000	0.000	0.000	0.000	0.018	0.000	0.009	299.817	0.810	0.9341717E-02	1.618705	0.6527834E-04	1.394399
07252011	20	0.040	0.002	0.006	0.000	0.000	0.000	0.000	0.000	0.019	0.000	0.010	298.852	0.822	0.1541173E-01	1.890359	0.6606433E-04	1.456577
07252011	21	0.069	0.004	0.006	0.000	0.000	0.000	0.001	0.000	0.020	0.000	0.011	298.219	0.845	NaN	3.308158	0.3488406E-04	1.976959
07252011	22	0.109	0.007	0.008	0.000	0.000	0.000	0.001	0.000	0.021	0.001	0.011	297.767	0.865	NaN	4.368284	0.2095854E-04	2.318950
07252011	23	0.142	0.010	0.009	0.000	0.000	0.000	0.001	0.000	0.021	0.001	0.011	297.414	0.881	NaN	4.950415	0.1560895E-04	2.501268
07252011	24	0.160	0.010	0.008	0.000	0.000	0.000	0.001	0.000	0.022	0.001	0.011	297.067	0.901	NaN	5.784681	0.1313404E-04	2.643881
07262011	01	0.157	0.009	0.007	0.001	0.000	0.000	0.002	0.000	0.021	0.002	0.011	296.744	0.920	0.2572275	5.253553	0.1048653E-04	2.699821
07262011	02	0.145	0.008	0.006	0.001	0.000	0.000	0.002	0.000	0.021	0.002	0.011	296.501	0.933	0.2921494	6.060812	0.1099880E-04	2.741185
07262011	03	0.136	0.008	0.005	0.001	0.001	0.000	0.002	0.001	0.020	0.002	0.011	296.330	0.940	0.3341912	6.592715	0.9811613E-05	2.827324
07262011	04	0.123	0.009	0.005	0.001	0.001	0.000	0.002	0.001	0.019	0.002	0.011	296.186	0.948	0.3910126	8.264502	0.1112778E-04	2.870808
07262011	05	0.108	0.011	0.005	0.001	0.001	0.000	0.002	0.001	0.019	0.003	0.011	296.052	0.956	0.4736457	11.31788	0.1381608E-04	2.913380
07262011	06	0.094	0.012	0.006	0.001	0.001	0.000	0.002	0.001	0.018	0.003	0.011	295.994	0.962	0.4408978	11.41443	0.1616858E-04	2.848783
07262011	07	0.074	0.013	0.009	0.001	0.002	0.001	0.003	0.002	0.016	0.004	0.010	296.693	0.962	0.3951421	10.27037	0.1376496E-04	2.872811
07262011	08	0.055	0.027	0.018	0.001	0.002	0.000	0.002	0.002	0.016	0.004	0.010	297.995	0.922	0.7389748E-01	3.761126	0.1936382E-04	2.288327
07262011	09	0.037	0.050	0.028	0.000	0.002	0.000	0.001	0.002	0.019	0.002	0.012	299.630	0.863	NaN	7.043473	0.3085646E-03	1.358441
07262011	10	0.027	0.047	0.033	0.000	0.001	0.000	0.001	0.001	0.030	0.001	0.017	301.444	0.785	NaN	5.038750	0.4050250E-02	0.9484099E-01
07262011	11	0.011	0.047	0.034	0.000	0.001	0.000	0.001	0.001	0.043	0.001	0.023	302.804	0.709	NaN	3.350355	0.1757748E-01	-0.7198657
07262011	12	0.011	0.029	0.028	0.000	0.000	0.000	0.001	0.001	0.052	0.000	0.028	303.376	0.676	NaN	3.412292	0.1274953E-01	-0.5724481
07262011	13	0.041	0.010	0.019	0.000	0.000	0.000	0.001	0.001	0.055	0.000	0.028	304.239	0.640	NaN	3.354667	0.3302986E-03	1.006743
07262011	14	0.071	0.005	0.013	0.000	0.000	0.000	0.001	0.001	0.052	0.000	0.027	304.775	0.613	NaN	2.740817	0.1511083E-03	1.258592
07262011	15	0.086	0.005	0.012	0.000	0.000	0.000	0.000	0.000	0.051	0.000	0.026	304.389	0.628	0.7732153E-02	2.434457	0.1606102E-03	1.180629
07262011	16	0.073	0.009	0.012	0.000	0.000	0.000	0.000	0.000	0.050	0.000	0.026	303.977	0.637	0.7429361E-02	2.507232	0.1857719E-03	1.130215
07262011	17	0.067	0.009	0.012	0.000	0.000	0.000	0.000	0.000	0.052	0.000	0.026	303.444	0.636	0.7925928E-02	2.507232	0.1907521E-03	1.118725
07262011	18	0.076	0.006	0.011	0.001	0.000	0.000	0.001	0.000	0.052	0.000	0.027	302.742	0.647	0.1923209E-01	2.666164	0.9270323E-04	1.458792
07262011	19	0.075	0.005	0.009	0.001	0.000	0.000	0.001	0.001	0.054	0.000	0.028	301.691	0.702	0.2554756E-01	3.136313	0.9821876E-04	1.504225
07262011	20	0.024	0.009	0.014	0.001	0.000	0.000	0.001	0.001	0.063	0.001	0.033	298.852	0.822	0.4102224E-01	6.038243	0.2399456E-03	1.400798
07262011	21	0.026	0.010	0.013	0.001	0.000	0.000	0.001	0.001	0.067	0.001	0.035	298.219	0.845	0.5066335E-01	7.594809	0.2547441E-03	1.474413
07262011	22	0.037	0.013	0.013	0.001	0.000	0.000	0.001	0.001	0.069	0.001	0.036	297.767	0.865	0.7830757E-01	9.028259	0.2034232E-03	1.647204
07262011	23	0.042	0.015	0.013	0.001	0.001	0.000	0.002	0.001	0.071	0.002	0.037	297.414	0.881	0.1124880	10.14118	0.1608194E-03	1.799750
07262011	24	0.045	0.015	0.011	0.001	0.001	0.000	0.002	0.001	0.074	0.002	0.038	297.067	0.901	0.1636770	12.53766	0.1393596E-03	1.954080
07272011	01	0.045	0.014	0.008	0.002	0.001	0.000	0.002	0.002	0.076	0.002	0.040	296.744	0.920	0.2290991	16.14963	0.1335414E-03	2.082546
07272011	02	0.044	0.014	0.006	0.002	0.001	0.000	0.003	0.003	0.079	0.003	0.042	296.501	0.933	0.2867902	19.11307	0.1259959E-03	2.180974
07272011	03	0.043	0.014	0.005	0.002	0.001	0.001	0.003	0.003	0.081	0.003	0.043	296.330	0.940	0.3575814	23.00879	0.1188334E-03	2.286955
07272011	04	0.043	0.016	0.005	0.002	0.001	0.001	0.003	0.004	0.083	0.003	0.045	296.186	0.948	0.4387555	28.97784	0.1216983E-03	2.376782
07272011	05	0.042	0.018	0.005	0.002	0.001	0.001	0.003	0.004	0.087	0.004	0.047	296.052	0.956	0.5407580	39.50943	0.1367953E-03	2.460630
07272011	06	0.040	0.019	0.005	0.002	0.002	0.001	0.004	0.005	0.090	0.005	0.049	295.994	0.962	0.5587728	40.88953	0.1362338E-03	2.477327
07272011	07	0.033	0.020	0.008	0.001	0.002	0.001	0.004	0.005	0.093	0.005	0.051	296.693	0.962	0.4806638	42.50785	0.1853794E-03	2.360408
07272011	08	0.022	0.039	0.020	0.001	0.002	0.001	0.003	0.004	0.104	0.007	0.056	297.995	0.922	0.1520916	22.08473	0.3448343E-03	1.806482
07272011	09	0.019	0.071	0.036	0.001	0.002	0.001	0.002	0.003	0.107	0.004	0.058	299.630	0.863	0.4684603E-01	13.15161	0.6001495E-03	1.340719
07272011	10	0.029	0.072	0.038	0.000	0.002	0.000	0.002	0.003	0.103	0.003	0.056	301.444	0.785	NaN	11.25166	0.5965152E-02	0.2755952
07272011	11	0.025	0.069	0.037	0.000	0.001	0.000	0.001	0.003	0.103	0.002	0.055	302.804	0.709	NaN	7.685834	0.7706068E-02	-0.1141829E-02
07272011	12	0.049	0.040	0.030	0.000	0.001	0.000	0.001	0.002	0.100	0.001	0.053	303.376	0.676	NaN	7.058102	0.7945385E-03	0.9485729
07272011	13	0.122	0.014	0.020	0.000	0.000	0.000	0.001	0.002	0.090	0.001	0.047	304.239	0.640	NaN	5.195309	0.1521761E-03	1.533265
07272011	14	0.197	0.006	0.014	0.000	0.000	0.000	0.001	0.001	0.080	0.001	0.042	304.775	0.613	NaN	4.145097	0.8653133E-04	1.680361
07272011	15	0.240	0.004	0.012	0.000	0.000	0.000	0.001	0.001	0.075	0.001	0.039	304.389	0.628	NaN	4.059227	0.6313543E-04	1.808170
07272011	16	0.213	0.006	0.012	0.000	0.000	0.000	0.001	0.001	0.071	0.001	0.036	303.977	0.637	NaN	3.901616	0.6216320E-04	1.797711
07272011	17	0.197	0.006	0.012	0.000	0.000	0.000	0.001	0.001	0.069	0.001	0.035	303.444	0.636	NaN	3.805272	0.6304622E-04	1.780727
07272011	18	0.215	0.004	0.011	0.001	0.000	0.000	0.001	0.001	0.067	0.001	0.035	302.742	0.647	0.3990090E-01	3.376416	0.7003089E-04	1.683166
07272011	19	0.199	0.005	0.009	0.001	0.000	0.000	0.001	0.001	0.066	0.001	0.034	301.691	0.702	0.5722785E-01	3.860825	0.6388968E-04	1.781249
07272011	20	0.155	0.008	0.010	0.001	0.000	0.000	0.002	0.001	0.069	0.001	0.036	301.073	0.662	0.4555231E-01	3.570595	0.8559667E-04	1.620284
07272011	21	0.191	0.011	0.011	0.001	0.001	0.001	0.002	0.002	0.076	0.001	0.041	299.919	0.716	0.1077188	4.995037	0.6013633E-04	1.919402
07272011	22	0.209	0.013	0.010	0.002	0.001	0.001	0.003	0.003	0.074	0.002	0.041	298.732	0.783	0.2153972	6.232187	0.4095170E-04	2.182369
07272011	23	0.157	0.010	0.007	0.002	0.001	0.001	0.003	0.004	0.064	0.001	0.037	297.878	0.850	0.2364252	7.681894	0.3969715E-04	2.286709
07272011	24	0.097	0.009	0.004	0.002	0.001	0.001	0.003	0.004	0.052	0.001	0.032	297.288	0.897	0.2376863	9.462092	0.4500687E-04	2.322708
07282011	01	0.066	0.011	0.003	0.002	0.001	0.001	0.002	0.004	0.042	0.001	0.026	296.819	0.932	0.2412591	10.60436	0.4549535E-04	2.367517
07282011	02	0.058	0.013	0.003	0.001	0.001	0.001	0.002	0.003	0.039	0.001	0.024	296.547	0.949	0.3207816	14.44490	0.4741352E-04	2.483812
07282011	03	0.060	0.015	0.003	0.001	0.001	0.001	0.002	0.003	0.041	0.001	0.024	296.450	0.951	0.3407559	14.50778	0.4417375E-04	2.516437
07282011	04	0.071	0.012	0.003	0.001	0.001	0.000	0.002	0.002	0.044	0.002	0.025	296.440	0.951	0.3853154	16.32652	0.4666955E-04	2.543860
07282011	05	0.078	0.009	0.003	0.001	0.001	0.001	0.002	0.002	0.046	0.002	0.026	296.468	0.951	0.4290280	16.97979	0.4136835E-04	2.613264
07282011	06	0.077	0.008	0.004	0.001	0.002	0.001	0.003	0.004	0.046	0.003	0.027	296.575	0.949	0.4395047	16.84235	0.3745785E-04	2.652860
07282011	07	0.076	0.008	0.007	0.001	0.002	0.001	0.003	0.006	0.042	0.003	0.029	297.742	0.909	0.1854581	8.813429	0.4510999E-04	2.290872
07282011	08	0.048	0.010	0.013	0.001	0.001	0.001	0.003	0.005	0.041	0.002	0.028	299.014	0.879	0.6405914E-01	6.453610	0.8761330E-04	1.867233
07282011	09	0.006	0.023	0.015	0.000	0.000	0.000	0.001	0.002	0.047	0.000	0.027	300.134	0.835	NaN	5.641865	0.6345850E-02	-0.5106715E-01
07282011	10	0.012	0.035	0.015	0.000	0.000	0.000	0.001	0.001	0.053	0.001	0.028	300.905	0.793	NaN	5.285705	0.2999660E-02	0.2460309
07282011	11	0.018	0.036	0.015	0.000	0.000	0.000	0.000	0.001	0.058	0.001	0.030	301.591	0.766	NaN	5.373419	0.1540133E-02	0.5426924
07282011	12	0.014	0.031	0.013	0.000	0.000	0.000	0.000	0.001	0.064	0.000	0.033	302.249	0.739	NaN	4.879418	0.1998873E-02	0.3875828
07282011	13	0.018	0.024	0.012	0.000	0.000	0.000	0.000	0.001	0.064	0.000	0.032	302.719	0.716	NaN	4.461568	0.1034469E-02	0.6347701
07282011	14	0.030	0.017	0.010	0.000	0.000	0.000	0.000	0.001	0.056	0.000	0.029	302.769	0.714	NaN	3.901456	0.4609091E-03	0.9276114
07282011	15	0.045	0.011	0.009	0.000	0.000	0.000	0.000	0.001	0.047	0.000	0.024	302.565	0.720	NaN	3.399927	0.2024942E-03	1.225057
07282011	16	0.059	0.007	0.007	0.000	0.000	0.000	0.000	0.001	0.037	0.000	0.020	302.325	0.724	NaN	2.789168	0.1211973E-03	1.361982
07282011	17	0.058	0.004	0.006	0.000	0.000	0.000	0.000	0.001	0.029	0.000	0.016	301.446	0.751	NaN	2.511875	0.8740051E-04	1.458484
07282011	18	0.054	0.002	0.005	0.000	0.000	0.000	0.000	0.001	0.024	0.000	0.013	300.710	0.803	NaN	2.536716	0.6651583E-04	1.581347
07282011	19	0.055	0.002	0.003	0.001	0.000	0.000	0.001	0.001	0.018	0.000	0.011	300.094	0.820	0.2472836E-01	1.879453	0.2731705E-04	1.837598
07282011	20	0.039	0.002	0.003	0.001	0.000	0.000	0.001	0.001	0.013	0.000	0.008	298.883	0.844	0.2076709E-01	1.465470	0.2327751E-04	1.799040
07282011	21	0.033	0.003	0.002	0.001	0.000	0.000	0.001	0.002	0.009	0.000	0.007	298.243	0.860	0.1912785E-01	1.181744	0.1391607E-04	1.929007
07282011	22	0.038	0.003	0.002	0.001	0.000	0.000	0.001	0.002	0.006	0.000	0.006	297.696	0.893	0.1823664E-01	1.186026	0.1215239E-04	1.989433
07282011	23	0.037	0.002	0.003	0.001	0.000	0.000	0.001	0.002	0.005	0.000	0.005	297.439	0.898	0.1234275E-01	0.9725773	0.1102006E-04	1.945740
07282011	24	0.038	0.002	0.003	0.001	0.000	0.000	0.001	0.002	0.004	0.000	0.005	296.999	0.922	0.1834887E-01	1.221901	0.1051381E-04	2.065276
07292011	01	0.043	0.003	0.003	0.001	0.001	0.000	0.001	0.002	0.003	0.000	0.005	296.683	0.940	0.4175693E-01	1.686408	0.7218676E-05	2.368505
07292011	02	0.045	0.003	0.003	0.001	0.001	0.000	0.001	0.002	0.003	0.000	0.005	296.462	0.937	0.4588437E-01	1.693904	0.6782805E-05	2.397479
07292011	03	0.045	0.003	0.004	0.001	0.001	0.000	0.001	0.002	0.004	0.000	0.005	296.225	0.941	0.4997164E-01	1.723384	0.6577853E-05	2.418298
07292011	04	0.052	0.005	0.004	0.000	0.001	0.000	0.001	0.002	0.005	0.000	0.005	296.078	0.945	NaN	4.168803	0.1122147E-04	2.569962
07292011	05	0.057	0.006	0.005	0.001	0.001	0.000	0.002	0.002	0.006	0.001	0.006	295.986	0.946	0.1278319	3.094635	0.6576476E-05	2.672616
07292011	06	0.065	0.008	0.006	0.001	0.001	0.001	0.002	0.002	0.006	0.001	0.007	295.925	0.946	0.1973605	3.963212	0.6216950E-05	2.804470
07292011	07	0.055	0.016	0.010	0.001	0.001	0.001	0.002	0.003	0.010	0.002	0.009	296.450	0.934	0.1059670	3.210037	0.9386286E-05	2.534016
07292011	08	0.034	0.064	0.022	0.000	0.001	0.000	0.002	0.002	0.022	0.002	0.014	297.827	0.890	NaN	8.619884	0.2422400E-03	1.551255
07292011	09	0.001	0.085	0.029	0.000	0.001	0.000	0.001	0.001	0.032	0.000	0.029	299.465	0.826	0.9654164E-03	5.489977	0.4954191E-02	0.4459775E-01
07292011	10	0.000	0.042	0.030	0.000	0.000	0.000	0.001	0.001	0.036	0.000	0.045	300.953	0.765	0.1567006E-03	7.278518	0.1143046E-01	-0.1960208
07292011	11	0.001	0.024	0.028	0.000	0.000	0.000	0.001	0.001	0.057	0.000	0.049	301.523	0.719	0.3587604E-03	5.583454	0.5212967E-02	0.2981797E-01
07292011	12	0.013	0.012	0.022	0.000	0.000	0.000	0.001	0.001	0.090	0.001	0.046	302.783	0.693	NaN	5.671329	0.6086617E-02	-0.3069108E-01
07292011	13	0.048	0.005	0.019	0.000	0.000	0.000	0.001	0.001	0.076	0.001	0.039	303.467	0.670	NaN	4.929645	0.4080630E-03	1.082088
07292011	14	0.092	0.002	0.015	0.000	0.000	0.000	0.001	0.001	0.060	0.000	0.031	303.693	0.657	NaN	3.743112	0.1243602E-03	1.478552
07292011	15	0.098	0.001	0.013	0.000	0.000	0.000	0.000	0.001	0.050	0.000	0.026	303.554	0.655	NaN	3.157910	0.9675238E-04	1.513738
07292011	16	0.097	0.001	0.012	0.000	0.000	0.000	0.000	0.000	0.044	0.000	0.023	303.288	0.662	0.1127523E-01	2.358974	0.1147278E-03	1.313055
07292011	17	0.087	0.001	0.011	0.000	0.000	0.000	0.000	0.001	0.042	0.000	0.022	302.754	0.668	NaN	2.748681	0.8629452E-04	1.503141
07292011	18	0.098	0.001	0.010	0.000	0.000	0.000	0.001	0.001	0.039	0.000	0.021	301.930	0.696	NaN	2.874308	0.6431176E-04	1.650243
07292011	19	0.117	0.003	0.008	0.000	0.000	0.000	0.001	0.001	0.039	0.000	0.021	301.154	0.728	NaN	3.092401	0.5113484E-04	1.781579
07292011	20	0.136	0.004	0.007	0.001	0.000	0.000	0.001	0.002	0.040	0.000	0.023	299.884	0.744	0.4591936E-01	2.821728	0.4945416E-04	1.756312
07292011	21	0.191	0.005	0.006	0.001	0.001	0.001	0.002	0.003	0.039	0.001	0.024	299.274	0.758	0.8736920E-01	3.132459	0.2603390E-04	2.080346
07292011	22	0.241	0.006	0.006	0.001	0.001	0.001	0.003	0.005	0.038	0.001	0.025	298.914	0.770	0.1406469	3.129955	0.1633603E-04	2.282392
07292011	23	0.251	0.007	0.006	0.001	0.001	0.001	0.003	0.006	0.036	0.001	0.026	298.556	0.795	0.1687669	3.580409	0.1509559E-04	2.375082
07292011	24	0.236	0.007	0.005	0.002	0.001	0.001	0.004	0.006	0.034	0.001	0.026	298.216	0.821	0.1799268	3.932799	0.1468924E-04	2.427702
07302011	01	0.222	0.007	0.004	0.002	0.001	0.001	0.005	0.007	0.032	0.002	0.026	297.762	0.861	0.2353288	4.777932	0.1228335E-04	2.589923
07302011	02	0.224	0.007	0.003	0.002	0.002	0.001	0.005	0.008	0.029	0.002	0.026	297.360	0.905	0.3872496	7.170020	0.9830866E-05	2.862929
07302011	03	0.230	0.007	0.003	0.002	0.002	0.002	0.006	0.009	0.026	0.003	0.026	297.255	0.911	0.4173024	6.959095	0.7390974E-05	2.973851
07302011	04	0.249	0.008	0.003	0.002	0.002	0.002	0.006	0.009	0.024	0.003	0.025	297.207	0.911	0.4327927	6.633327	0.6175355E-05	3.031070
07302011	05	0.257	0.010	0.003	0.002	0.002	0.002	0.006	0.009	0.022	0.003	0.024	297.187	0.910	0.4344923	6.276164	0.5363240E-05	3.068267
07302011	06	0.270	0.012	0.003	0.002	0.002	0.002	0.006	0.009	0.022	0.004	0.024	297.197	0.910	0.4514987	6.440191	0.5207570E-05	3.092264
07302011	07	0.274	0.013	0.004	0.002	0.003	0.002	0.006	0.009	0.022	0.004	0.023	298.149	0.895	0.3742556	5.404267	0.4638543E-05	3.066355
07302011	08	0.224	0.019	0.009	0.002	0.003	0.001	0.006	0.007	0.023	0.004	0.022	299.878	0.848	0.1450145	3.649124	0.8632976E-05	2.626028
07302011	09	0.112	0.061	0.021	0.001	0.002	0.001	0.003	0.004	0.029	0.002	0.020	300.850	0.816	0.4686332E-01	3.175612	0.2781021E-04	2.057623
07302011	10	0.041	0.077	0.024	0.000	0.001	0.000	0.002	0.002	0.029	0.001	0.017	301.837	0.774	NaN	4.265795	0.1834366E-03	1.366514
07302011	11	0.018	0.063	0.022	0.000	0.001	0.000	0.001	0.001	0.026	0.000	0.015	302.779	0.728	NaN	2.905435	0.2665122E-02	0.3749412E-01
07302011	12	0.013	0.044	0.019	0.000	0.001	0.000	0.001	0.001	0.027	0.000	0.015	303.138	0.694	NaN	2.273037	0.3343147E-02	-0.1675490
07302011	13	0.018	0.031	0.015	0.000	0.001	0.000	0.001	0.001	0.032	0.000	0.017	302.498	0.699	NaN	2.628232	0.6333040E-03	0.6180514
07302011	14	0.024	0.030	0.013	0.001	0.001	0.000	0.001	0.001	0.036	0.000	0.020	303.842	0.685	0.1293463E-01	2.147350	0.6502773E-04	1.518804
07302011	15	0.011	0.039	0.015	0.000	0.001	0.000	0.001	0.001	0.038	0.000	0.021	303.390	0.695	NaN	2.835985	0.3111067E-02	-0.4020550E-01
07302011	16	0.019	0.037	0.013	0.000	0.001	0.000	0.001	0.002	0.039	0.000	0.022	302.027	0.722	NaN	3.211847	0.6499391E-03	0.6938822
07302011	17	0.031	0.040	0.011	0.000	0.001	0.000	0.001	0.003	0.038	0.000	0.023	301.838	0.742	NaN	3.403056	0.2675266E-03	1.104502
07302011	18	0.030	0.040	0.009	0.000	0.001	0.001	0.001	0.003	0.036	0.000	0.023	301.184	0.776	NaN	3.924040	0.2248029E-03	1.241932
07302011	19	0.026	0.034	0.009	0.000	0.001	0.001	0.001	0.003	0.035	0.000	0.022	300.236	0.812	NaN	4.349959	0.2262969E-03	1.283807
07302011	20	0.046	0.029	0.008	0.000	0.001	0.001	0.002	0.005	0.032	0.000	0.023	298.998	0.848	NaN	5.173854	0.7972509E-04	1.812219
07302011	21	0.095	0.026	0.006	0.000	0.001	0.002	0.004	0.009	0.021	0.001	0.023	298.279	0.873	NaN	4.794983	0.1955284E-04	2.389577
07302011	22	0.140	0.026	0.005	0.000	0.001	0.002	0.005	0.013	0.011	0.001	0.023	297.795	0.885	NaN	4.246673	0.6925692E-05	2.787586
07302011	23	0.169	0.026	0.004	0.001	0.002	0.003	0.006	0.015	0.004	0.002	0.022	297.461	0.894	0.3905587	2.645683	0.6670886E-06	3.598354
07302011	24	0.176	0.025	0.004	0.001	0.002	0.003	0.007	0.016	0.002	0.002	0.020	297.280	0.890	0.2562473	1.509960	0.3792035E-06	3.600093
