# Supplementary material for: Understanding nitrate formation in a world with less sulfate
Source: Copernicus journal article supplement (doi:10.5194/acp-18-12765-2018), 2018-09-05
Supplement: Supplementary file 2 [file acp-18-12765-2018-supplement.zip › DATA/RAW DATA FOR DIURNALS/data_extract_YRK_jul_mod2011.csv]

Date	Hour	NH3	SO2	HNO3	CL	NA	MG	K	CA	NH4	NO3	SO4	T	RH	e_NO3	Water	H+	pH
07022011	01	0.147	0.007	0.007	0.001	0.001	0.001	0.003	0.004	0.026	0.002	0.019	295.031	0.840	0.2054239	3.434573	0.1277952E-04	2.429358
07022011	02	0.135	0.008	0.008	0.001	0.001	0.001	0.003	0.004	0.030	0.003	0.020	294.560	0.875	0.3017641	5.068642	0.1366604E-04	2.569249
07022011	03	0.123	0.009	0.008	0.001	0.001	0.001	0.003	0.004	0.034	0.003	0.021	294.348	0.882	0.3051610	5.350179	0.1571441E-04	2.532070
07022011	04	0.111	0.011	0.009	0.001	0.001	0.001	0.003	0.004	0.038	0.004	0.022	294.207	0.882	0.3073347	5.747827	0.1828781E-04	2.497342
07022011	05	0.100	0.013	0.010	0.001	0.001	0.001	0.003	0.003	0.042	0.004	0.024	294.096	0.882	0.3135278	6.646206	0.2492890E-04	2.425871
07022011	06	0.088	0.016	0.012	0.001	0.001	0.001	0.003	0.003	0.045	0.004	0.025	294.094	0.885	0.3256396	7.716897	0.2940592E-04	2.419008
07022011	07	0.076	0.016	0.016	0.001	0.001	0.001	0.003	0.002	0.046	0.006	0.025	295.355	0.893	0.2435357	8.023017	0.4032343E-04	2.298780
07022011	08	0.077	0.014	0.025	0.001	0.001	0.001	0.003	0.002	0.046	0.006	0.025	297.707	0.831	0.9333754E-01	4.941874	0.5133193E-04	1.983504
07022011	09	0.062	0.024	0.038	0.000	0.001	0.001	0.002	0.001	0.043	0.003	0.023	299.242	0.774	NaN	6.698818	0.1571014E-03	1.629818
07022011	10	0.065	0.033	0.039	0.000	0.000	0.000	0.001	0.001	0.037	0.001	0.020	301.062	0.701	NaN	4.439377	0.1407003E-03	1.499027
07022011	11	0.071	0.052	0.040	0.000	0.000	0.000	0.001	0.001	0.035	0.001	0.019	303.143	0.608	NaN	3.075704	0.9773568E-04	1.497891
07022011	12	0.070	0.067	0.033	0.000	0.000	0.000	0.001	0.001	0.033	0.000	0.018	304.626	0.542	NaN	2.079961	0.7173075E-04	1.462350
07022011	13	0.087	0.042	0.024	0.000	0.000	0.000	0.001	0.001	0.033	0.000	0.018	305.168	0.514	NaN	1.653082	0.4931620E-04	1.525305
07022011	14	0.117	0.021	0.018	0.000	0.000	0.000	0.001	0.001	0.034	0.000	0.018	305.698	0.490	NaN	1.412720	0.3735959E-04	1.577654
07022011	15	0.185	0.009	0.014	0.000	0.000	0.000	0.001	0.001	0.033	0.000	0.018	305.422	0.486	NaN	1.330399	0.2541282E-04	1.718929
07022011	16	0.281	0.002	0.009	0.000	0.000	0.000	0.001	0.001	0.030	0.000	0.016	305.015	0.508	NaN	1.177349	0.1653132E-04	1.852598
07022011	17	0.303	0.001	0.007	0.000	0.000	0.000	0.001	0.001	0.026	0.000	0.015	304.588	0.514	NaN	1.065184	0.1514630E-04	1.847118
07022011	18	0.305	0.001	0.005	0.000	0.000	0.000	0.001	0.002	0.023	0.000	0.014	304.076	0.503	NaN	0.8587245	0.1321793E-04	1.812690
07022011	19	0.299	0.001	0.004	0.000	0.000	0.001	0.002	0.003	0.020	0.000	0.014	302.526	0.543	NaN	0.9159681	0.8022110E-05	2.057592
07022011	20	0.239	0.002	0.004	0.001	0.001	0.001	0.002	0.004	0.020	0.000	0.015	300.176	0.626	0.2890956E-01	1.079835	0.1040927E-04	2.015937
07022011	21	0.164	0.002	0.003	0.001	0.001	0.001	0.002	0.004	0.021	0.000	0.016	298.770	0.662	0.3888881E-01	1.284652	0.1485743E-04	1.936842
07022011	22	0.128	0.002	0.004	0.002	0.001	0.001	0.002	0.004	0.022	0.001	0.017	297.616	0.701	0.4297382E-01	1.580072	0.1954138E-04	1.907722
07022011	23	0.103	0.003	0.004	0.002	0.001	0.001	0.003	0.004	0.022	0.001	0.017	296.812	0.750	0.5440700E-01	1.868051	0.1939593E-04	1.983678
07022011	24	0.088	0.004	0.004	0.002	0.001	0.001	0.003	0.005	0.022	0.001	0.018	296.093	0.802	0.7182246E-01	2.294478	0.2004371E-04	2.058706
07032011	01	0.076	0.007	0.004	0.002	0.001	0.001	0.003	0.006	0.020	0.001	0.019	295.449	0.858	0.1066903	3.194581	0.2051178E-04	2.192411
07032011	02	0.068	0.010	0.003	0.003	0.001	0.001	0.004	0.008	0.018	0.001	0.020	295.036	0.887	0.1378361	3.720560	0.1670711E-04	2.347707
07032011	03	0.062	0.013	0.003	0.003	0.001	0.002	0.004	0.009	0.018	0.001	0.021	294.793	0.898	0.1663513	4.116720	0.1434710E-04	2.457787
07032011	04	0.056	0.014	0.003	0.003	0.002	0.002	0.005	0.009	0.019	0.002	0.023	294.606	0.905	0.2052721	5.389642	0.1840579E-04	2.466605
07032011	05	0.052	0.015	0.003	0.003	0.002	0.002	0.005	0.009	0.020	0.002	0.024	294.581	0.894	0.1555039	4.671678	0.2299645E-04	2.307812
07032011	06	0.051	0.015	0.003	0.003	0.002	0.002	0.005	0.009	0.022	0.002	0.024	294.530	0.909	0.2015647	5.739594	0.2219230E-04	2.412679
07032011	07	0.063	0.016	0.005	0.003	0.002	0.002	0.005	0.009	0.024	0.002	0.025	295.952	0.892	0.1504249	5.026425	0.2311215E-04	2.337419
07032011	08	0.082	0.017	0.008	0.002	0.002	0.002	0.005	0.008	0.028	0.003	0.025	297.920	0.838	0.8682340E-01	3.748850	0.2381021E-04	2.197135
07032011	09	0.057	0.030	0.013	0.001	0.001	0.001	0.002	0.004	0.040	0.002	0.026	299.489	0.774	0.2883345E-01	3.375805	0.9318588E-04	1.559027
07032011	10	0.072	0.032	0.015	0.000	0.001	0.000	0.002	0.003	0.043	0.001	0.026	301.454	0.688	NaN	3.429931	0.9868986E-04	1.541013
07032011	11	0.088	0.048	0.018	0.000	0.001	0.000	0.002	0.003	0.042	0.001	0.025	303.580	0.587	NaN	2.442407	0.7532015E-04	1.510907
07032011	12	0.106	0.047	0.020	0.000	0.000	0.000	0.001	0.002	0.039	0.001	0.023	305.107	0.521	NaN	1.913728	0.5953973E-04	1.507073
07032011	13	0.134	0.032	0.019	0.000	0.001	0.000	0.001	0.002	0.036	0.001	0.022	306.507	0.470	NaN	1.547196	0.4146636E-04	1.571850
07032011	14	0.176	0.012	0.015	0.000	0.001	0.000	0.001	0.002	0.038	0.000	0.022	305.850	0.481	NaN	1.505116	0.3432435E-04	1.641968
07032011	15	0.287	0.002	0.009	0.000	0.000	0.000	0.001	0.002	0.033	0.000	0.019	305.012	0.514	NaN	1.309635	0.1973188E-04	1.821982
07032011	16	0.329	0.001	0.007	0.000	0.000	0.000	0.001	0.002	0.027	0.000	0.016	304.086	0.546	NaN	1.212207	0.1363747E-04	1.948843
07032011	17	0.327	0.001	0.006	0.000	0.000	0.000	0.001	0.002	0.022	0.000	0.013	303.519	0.551	NaN	0.9617580	0.9792652E-05	1.992165
07032011	18	0.333	0.001	0.006	0.000	0.000	0.000	0.001	0.001	0.019	0.000	0.011	302.482	0.572	NaN	0.9483643	0.7901079E-05	2.079289
07032011	19	0.288	0.001	0.005	0.000	0.000	0.000	0.001	0.002	0.015	0.000	0.011	300.813	0.685	NaN	1.268542	0.7674245E-05	2.218269
07032011	20	0.182	0.002	0.005	0.001	0.001	0.001	0.002	0.004	0.013	0.000	0.012	299.531	0.699	0.2791870E-01	0.9929914	0.7055440E-05	2.148421
07032011	21	0.140	0.003	0.005	0.001	0.001	0.001	0.002	0.004	0.012	0.000	0.013	298.576	0.722	0.3453463E-01	1.185925	0.1036236E-04	2.058599
07032011	22	0.100	0.002	0.005	0.001	0.001	0.001	0.002	0.004	0.014	0.000	0.013	297.807	0.748	0.3123224E-01	1.313020	0.1343622E-04	1.989994
07032011	23	0.065	0.001	0.004	0.001	0.001	0.001	0.002	0.003	0.016	0.000	0.013	297.238	0.777	0.2913320E-01	1.620204	0.2249057E-04	1.857569
07032011	24	0.050	0.001	0.003	0.001	0.001	0.000	0.002	0.002	0.015	0.000	0.011	296.704	0.817	0.2670527E-01	1.694614	0.3098937E-04	1.737858
07042011	01	0.052	0.000	0.002	0.001	0.000	0.000	0.001	0.001	0.014	0.000	0.009	296.361	0.846	0.3239220E-01	1.778254	0.2689332E-04	1.820349
07042011	02	0.055	0.000	0.002	0.001	0.000	0.000	0.001	0.001	0.012	0.000	0.008	296.167	0.859	0.3227681E-01	1.660815	0.2234632E-04	1.871115
07042011	03	0.053	0.001	0.002	0.001	0.000	0.000	0.001	0.001	0.012	0.000	0.008	296.061	0.863	0.3183490E-01	1.660378	0.2302279E-04	1.858049
07042011	04	0.048	0.001	0.002	0.000	0.000	0.000	0.001	0.001	0.013	0.000	0.008	295.932	0.869	NaN	2.116319	0.2398548E-04	1.945633
07042011	05	0.045	0.001	0.003	0.000	0.000	0.000	0.001	0.000	0.013	0.000	0.008	295.804	0.871	NaN	2.543601	0.3151469E-04	1.906936
07042011	06	0.043	0.001	0.003	0.000	0.000	0.000	0.001	0.000	0.012	0.000	0.007	295.791	0.881	NaN	2.482445	0.2753396E-04	1.955011
07042011	07	0.038	0.001	0.003	0.000	0.000	0.000	0.001	0.000	0.010	0.000	0.006	296.893	0.873	NaN	2.032387	0.2928431E-04	1.841372
07042011	08	0.038	0.000	0.003	0.000	0.000	0.000	0.001	0.000	0.007	0.000	0.004	298.005	0.861	NaN	1.410802	0.1991589E-04	1.850266
07042011	09	0.037	0.000	0.002	0.000	0.000	0.000	0.000	0.000	0.006	0.000	0.004	299.234	0.825	0.4669845E-02	0.7968128	0.3125633E-04	1.406418
07042011	10	0.059	0.000	0.002	0.000	0.000	0.000	0.000	0.000	0.007	0.000	0.004	300.394	0.778	0.4289865E-02	0.6279435	0.2268354E-04	1.442210
07042011	11	0.085	0.001	0.003	0.000	0.000	0.000	0.000	0.000	0.009	0.000	0.005	301.369	0.744	0.4998684E-02	0.6711410	0.2235095E-04	1.477518
07042011	12	0.110	0.001	0.004	0.000	0.000	0.000	0.000	0.000	0.011	0.000	0.006	302.341	0.711	0.5356491E-02	0.7237636	0.2301421E-04	1.497601
07042011	13	0.107	0.005	0.008	0.000	0.000	0.000	0.000	0.000	0.016	0.000	0.008	303.550	0.675	0.4603267E-02	0.8743170	0.3509890E-04	1.396375
07042011	14	0.105	0.010	0.009	0.000	0.000	0.000	0.000	0.000	0.017	0.000	0.009	303.997	0.655	0.4131734E-02	0.9230769	0.4283563E-04	1.333433
07042011	15	0.105	0.011	0.009	0.000	0.000	0.000	0.000	0.000	0.016	0.000	0.008	303.188	0.671	0.4677534E-02	0.8465609	0.3544920E-04	1.378052
07042011	16	0.107	0.011	0.008	0.000	0.000	0.000	0.000	0.000	0.014	0.000	0.008	302.030	0.698	0.7026017E-02	0.9334890	0.3161683E-04	1.470191
07042011	17	0.102	0.012	0.008	0.000	0.000	0.000	0.000	0.000	0.014	0.000	0.007	300.617	0.733	0.9555519E-02	0.9067450	0.2475704E-04	1.563787
07042011	18	0.100	0.012	0.007	0.000	0.000	0.000	0.000	0.001	0.013	0.000	0.007	299.165	0.762	NaN	1.408691	0.1319057E-04	2.028552
07042011	19	0.100	0.010	0.006	0.000	0.000	0.000	0.000	0.000	0.011	0.000	0.006	297.612	0.807	0.2455813E-01	1.090797	0.1501699E-04	1.861161
07042011	20	0.111	0.009	0.005	0.000	0.000	0.000	0.000	0.000	0.009	0.000	0.005	296.530	0.837	0.3627002E-01	1.075711	0.9707487E-05	2.044589
07042011	21	0.105	0.008	0.005	0.000	0.000	0.000	0.000	0.000	0.008	0.000	0.004	295.907	0.859	0.3795290E-01	0.9817048	0.7335736E-05	2.126537
07042011	22	0.099	0.007	0.005	0.000	0.000	0.000	0.001	0.000	0.007	0.000	0.004	295.487	0.879	NaN	2.057263	0.6554641E-05	2.496741
07042011	23	0.090	0.007	0.005	0.000	0.000	0.000	0.001	0.001	0.008	0.000	0.005	295.247	0.892	NaN	2.265590	0.7170320E-05	2.499643
07042011	24	0.082	0.009	0.005	0.000	0.000	0.000	0.001	0.001	0.010	0.000	0.007	295.110	0.901	NaN	3.169133	0.1176838E-04	2.430224
07052011	01	0.080	0.011	0.006	0.000	0.000	0.000	0.002	0.002	0.013	0.001	0.009	295.039	0.905	NaN	4.455557	0.1374271E-04	2.510830
07052011	02	0.088	0.013	0.007	0.000	0.000	0.000	0.002	0.003	0.014	0.001	0.010	294.951	0.912	NaN	4.734409	0.1280547E-04	2.567870
07052011	03	0.102	0.013	0.007	0.000	0.000	0.000	0.002	0.003	0.014	0.002	0.010	294.875	0.919	NaN	5.709838	0.1178332E-04	2.685356
07052011	04	0.111	0.011	0.007	0.000	0.000	0.000	0.002	0.002	0.012	0.002	0.009	294.809	0.926	NaN	6.623045	0.1131586E-04	2.767370
07052011	05	0.113	0.009	0.007	0.000	0.000	0.000	0.002	0.002	0.011	0.002	0.007	294.747	0.932	NaN	5.692416	0.8662882E-05	2.817634
07052011	06	0.108	0.008	0.006	0.001	0.001	0.000	0.003	0.001	0.010	0.003	0.007	294.764	0.941	0.3143217	4.626827	0.5718039E-05	2.908036
07052011	07	0.086	0.007	0.008	0.000	0.001	0.000	0.003	0.001	0.008	0.003	0.006	295.675	0.938	NaN	7.627298	0.1405696E-04	2.734479
07052011	08	0.066	0.005	0.012	0.000	0.001	0.000	0.002	0.001	0.006	0.001	0.005	297.190	0.879	NaN	3.602741	0.1762308E-04	2.310551
07052011	09	0.063	0.004	0.011	0.000	0.000	0.000	0.001	0.000	0.006	0.000	0.004	298.361	0.841	NaN	2.298292	0.1741289E-04	2.120534
07052011	10	0.060	0.006	0.011	0.000	0.000	0.000	0.001	0.001	0.009	0.000	0.005	299.802	0.791	NaN	1.665757	0.1615465E-04	2.013314
07052011	11	0.051	0.007	0.010	0.000	0.000	0.000	0.001	0.001	0.010	0.000	0.006	301.150	0.743	NaN	1.348543	0.2259696E-04	1.775815
07052011	12	0.044	0.008	0.009	0.000	0.000	0.000	0.001	0.001	0.010	0.000	0.006	302.288	0.691	NaN	1.029070	0.2528572E-04	1.609570
07052011	13	0.036	0.005	0.008	0.000	0.000	0.000	0.001	0.001	0.010	0.000	0.006	302.569	0.667	NaN	0.8989612	0.3132294E-04	1.457878
07052011	14	0.037	0.003	0.007	0.000	0.000	0.000	0.001	0.001	0.010	0.000	0.006	303.068	0.654	NaN	0.7866152	0.3015894E-04	1.416346
07052011	15	0.042	0.002	0.006	0.000	0.000	0.000	0.000	0.001	0.009	0.000	0.006	302.521	0.672	NaN	0.8177831	0.3373699E-04	1.384532
07052011	16	0.061	0.001	0.004	0.000	0.000	0.000	0.000	0.000	0.008	0.000	0.005	302.573	0.677	0.1980066E-02	0.5464481	0.3775650E-04	1.160557
07052011	17	0.059	0.001	0.004	0.000	0.000	0.000	0.000	0.000	0.006	0.000	0.004	301.456	0.714	0.2282500E-02	0.4825091	0.2787820E-04	1.238241
07052011	18	0.046	0.000	0.002	0.000	0.000	0.000	0.000	0.000	0.006	0.000	0.003	299.647	0.804	0.3415585E-02	0.5145798	0.1960217E-04	1.419148
07052011	19	0.036	0.001	0.002	0.000	0.000	0.000	0.000	0.000	0.006	0.000	0.004	298.622	0.850	0.6812334E-02	0.8948547	0.2824766E-04	1.500770
07052011	20	0.033	0.002	0.002	0.000	0.000	0.000	0.001	0.000	0.008	0.000	0.005	297.556	0.879	NaN	1.735531	0.2791950E-04	1.793525
07052011	21	0.036	0.002	0.002	0.001	0.001	0.000	0.001	0.001	0.010	0.000	0.006	296.972	0.872	0.2121532E-01	1.277916	0.1613991E-04	1.898601
07052011	22	0.037	0.002	0.002	0.001	0.001	0.000	0.001	0.001	0.011	0.000	0.008	296.338	0.900	0.3666759E-01	2.290767	0.2664470E-04	1.934370
07052011	23	0.041	0.002	0.002	0.001	0.001	0.000	0.002	0.001	0.012	0.000	0.009	296.108	0.886	0.4125911E-01	2.382812	0.2681296E-04	1.948745
07052011	24	0.059	0.003	0.003	0.001	0.001	0.000	0.002	0.002	0.014	0.000	0.010	295.636	0.920	0.1030247	3.346549	0.1583935E-04	2.324860
07062011	01	0.082	0.003	0.003	0.001	0.001	0.000	0.002	0.002	0.016	0.001	0.011	295.285	0.939	0.2363337	5.378842	0.1261398E-04	2.629837
07062011	02	0.105	0.004	0.002	0.001	0.001	0.000	0.002	0.002	0.017	0.001	0.011	294.930	0.961	0.4688928	8.796082	0.9934161E-05	2.947158
07062011	03	0.127	0.004	0.002	0.002	0.001	0.000	0.002	0.002	0.018	0.002	0.012	294.738	0.972	0.6918319	15.39491	0.1100310E-04	3.145862
07062011	04	0.149	0.004	0.002	0.002	0.001	0.001	0.002	0.003	0.018	0.002	0.012	294.632	0.974	0.7376450	14.07914	0.7392843E-05	3.279765
07062011	05	0.166	0.005	0.002	0.002	0.001	0.001	0.003	0.003	0.018	0.003	0.012	294.571	0.975	0.8800234	24.31331	0.7999525E-05	3.482780
07062011	06	0.173	0.005	0.002	0.002	0.002	0.001	0.003	0.004	0.018	0.004	0.013	294.648	0.974	0.8044694	16.08966	0.6539286E-05	3.391017
07062011	07	0.143	0.006	0.004	0.002	0.002	0.001	0.004	0.004	0.021	0.005	0.014	295.636	0.963	0.6592324	13.16836	0.8604635E-05	3.184799
07062011	08	0.063	0.007	0.008	0.005	0.001	0.001	0.003	0.004	0.035	0.005	0.019	296.925	0.930	0.2139267	8.196110	0.2724574E-04	2.478309
07062011	09	0.012	0.011	0.006	0.000	0.000	0.000	0.000	0.000	0.008	0.000	0.004	297.828	0.908	0.5106926E-02	1.454545	0.6449302E-04	1.353215
07062011	10	0.019	0.011	0.015	0.000	0.000	0.000	0.000	0.001	0.018	0.000	0.010	299.107	0.846	NaN	4.023723	0.4361154E-03	0.9650266
07062011	11	0.015	0.005	0.013	0.000	0.000	0.000	0.000	0.001	0.022	0.000	0.012	299.488	0.815	NaN	3.362155	0.7081750E-03	0.6764771
07062011	12	0.045	0.001	0.007	0.000	0.000	0.000	0.000	0.000	0.020	0.000	0.010	300.342	0.777	0.8382440E-02	1.569859	0.7278811E-04	1.333800
07062011	13	0.047	0.003	0.007	0.000	0.000	0.000	0.000	0.000	0.020	0.000	0.010	301.716	0.721	0.4647434E-02	1.248439	0.8468418E-04	1.168565
07062011	14	0.049	0.006	0.008	0.000	0.000	0.000	0.000	0.000	0.021	0.000	0.011	302.237	0.696	0.4204869E-02	1.283547	0.9712167E-04	1.121096
07062011	15	0.052	0.007	0.008	0.000	0.000	0.000	0.000	0.000	0.022	0.000	0.011	302.336	0.684	0.4048526E-02	1.202186	0.9270803E-04	1.112854
07062011	16	0.060	0.008	0.008	0.000	0.000	0.000	0.000	0.000	0.020	0.000	0.010	302.071	0.688	0.4731953E-02	1.128668	0.7074363E-04	1.202879
07062011	17	0.068	0.008	0.008	0.000	0.000	0.000	0.000	0.000	0.017	0.000	0.009	301.731	0.699	0.5396128E-02	1.050175	0.5491756E-04	1.281550
07062011	18	0.082	0.007	0.007	0.000	0.000	0.000	0.000	0.000	0.016	0.000	0.008	301.486	0.707	0.6514966E-02	0.9650182	0.3862117E-04	1.397710
07062011	19	0.091	0.004	0.006	0.000	0.000	0.000	0.000	0.000	0.013	0.000	0.007	300.853	0.710	0.7234693E-02	0.8443909	0.2949504E-04	1.456795
07062011	20	0.087	0.003	0.005	0.000	0.000	0.000	0.001	0.000	0.011	0.000	0.006	299.253	0.752	NaN	1.187919	0.1385554E-04	1.933164
07062011	21	0.064	0.002	0.003	0.000	0.000	0.000	0.001	0.000	0.010	0.000	0.006	297.851	0.800	NaN	1.311795	0.1835548E-04	1.854100
07062011	22	0.055	0.002	0.003	0.000	0.000	0.000	0.001	0.000	0.010	0.000	0.006	297.070	0.819	NaN	1.460286	0.1992482E-04	1.865043
07062011	23	0.068	0.002	0.004	0.000	0.000	0.000	0.001	0.000	0.009	0.000	0.006	296.587	0.837	NaN	1.783707	0.1573608E-04	2.054427
07062011	24	0.090	0.004	0.005	0.000	0.001	0.000	0.001	0.000	0.009	0.000	0.006	296.131	0.864	NaN	2.224539	0.1078545E-04	2.314402
07072011	01	0.108	0.005	0.005	0.000	0.001	0.000	0.002	0.001	0.010	0.000	0.007	295.703	0.896	NaN	3.167814	0.7669467E-05	2.615994
07072011	02	0.116	0.006	0.006	0.000	0.001	0.000	0.002	0.001	0.010	0.001	0.007	295.395	0.915	NaN	4.667754	0.8149143E-05	2.757996
07072011	03	0.117	0.007	0.007	0.001	0.001	0.000	0.002	0.001	0.011	0.001	0.007	295.215	0.919	0.1900885	2.953888	0.5552949E-05	2.725870
07072011	04	0.114	0.008	0.008	0.001	0.001	0.000	0.002	0.001	0.012	0.002	0.008	295.070	0.919	0.2147297	3.566458	0.7116559E-05	2.699967
07072011	05	0.107	0.009	0.008	0.001	0.001	0.000	0.002	0.001	0.012	0.002	0.008	294.945	0.920	0.2074921	3.540971	0.7483736E-05	2.675004
07072011	06	0.102	0.010	0.009	0.001	0.001	0.000	0.003	0.001	0.012	0.002	0.008	294.956	0.919	0.2138667	3.623651	0.7023846E-05	2.712571
07072011	07	0.100	0.010	0.013	0.001	0.001	0.001	0.003	0.001	0.013	0.004	0.008	296.198	0.919	0.2037246	3.940157	0.6648665E-05	2.772779
07072011	08	0.085	0.008	0.021	0.001	0.001	0.001	0.003	0.001	0.014	0.003	0.009	298.192	0.862	0.5481428E-01	2.117688	0.9828743E-05	2.333364
07072011	09	0.048	0.013	0.018	0.000	0.000	0.000	0.001	0.001	0.014	0.001	0.009	299.357	0.813	NaN	3.434352	0.6276021E-04	1.738160
07072011	10	0.046	0.011	0.015	0.000	0.000	0.000	0.000	0.001	0.015	0.000	0.008	300.661	0.748	NaN	2.065343	0.4697876E-04	1.643091
07072011	11	0.053	0.006	0.012	0.000	0.000	0.000	0.000	0.001	0.014	0.000	0.008	301.617	0.705	NaN	1.550324	0.3658058E-04	1.627172
07072011	12	0.075	0.002	0.009	0.000	0.000	0.000	0.000	0.000	0.012	0.000	0.007	302.550	0.665	0.3291368E-02	0.7407408	0.4305251E-04	1.235668
07072011	13	0.108	0.001	0.006	0.000	0.000	0.000	0.000	0.000	0.011	0.000	0.006	303.344	0.628	0.2876461E-02	0.5617977	0.2771762E-04	1.306824
07072011	14	0.121	0.000	0.004	0.000	0.000	0.000	0.000	0.000	0.009	0.000	0.005	303.332	0.625	0.2698541E-02	0.4681648	0.2057561E-04	1.357046
07072011	15	0.126	0.000	0.003	0.000	0.000	0.000	0.000	0.000	0.007	0.000	0.004	303.032	0.640	0.2521515E-02	0.3857281	0.1533715E-04	1.400537
07072011	16	0.114	0.000	0.003	0.000	0.000	0.000	0.000	0.000	0.006	0.000	0.003	302.530	0.655	0.2122879E-02	0.3076923	0.1193172E-04	1.411413
07072011	17	0.097	0.000	0.002	0.000	0.000	0.000	0.000	0.000	0.006	0.000	0.003	301.967	0.660	0.2056122E-02	0.3076923	0.1355612E-04	1.355981
07072011	18	0.083	0.001	0.003	0.000	0.000	0.000	0.000	0.000	0.006	0.000	0.004	301.362	0.660	0.2630234E-02	0.4102564	0.2082850E-04	1.294397
07072011	19	0.081	0.002	0.003	0.000	0.000	0.000	0.001	0.001	0.006	0.000	0.004	300.631	0.718	NaN	0.5477034	0.6381765E-05	1.933605
07072011	20	0.086	0.004	0.003	0.001	0.001	0.000	0.001	0.002	0.005	0.000	0.005	299.318	0.744	0.6401420E-02	0.4080924	0.6331689E-05	1.809239
07072011	21	0.096	0.006	0.003	0.001	0.001	0.001	0.002	0.003	0.002	0.000	0.006	298.270	0.761	0.3291112E-01	0.4929037	0.6034675E-06	2.912108
07072011	22	0.103	0.007	0.003	0.001	0.001	0.001	0.002	0.004	0.001	0.000	0.006	297.507	0.782	0.7783097E-01	0.3603460	0.1127108E-06	3.504754
07072011	23	0.113	0.007	0.003	0.001	0.001	0.001	0.003	0.004	0.000	0.000	0.006	296.908	0.806	0.9040749E-01	0.3794739	0.1140541E-06	3.522071
07072011	24	0.123	0.007	0.003	0.001	0.001	0.001	0.003	0.004	0.001	0.000	0.006	296.349	0.840	0.1166552	0.4616019	0.1324041E-06	3.542366
07082011	01	0.129	0.007	0.003	0.001	0.001	0.001	0.003	0.005	0.001	0.001	0.006	295.799	0.882	0.7483619E-01	0.3248462	0.7595035E-07	3.631148
07082011	02	0.128	0.007	0.003	0.001	0.001	0.001	0.003	0.005	0.001	0.001	0.006	295.406	0.908	0.1082602	0.4903468	0.1330186E-06	3.566591
07082011	03	0.123	0.007	0.003	0.001	0.002	0.001	0.004	0.006	0.001	0.001	0.006	295.212	0.911	0.4999999	0.6883284	0.2070135E-06	3.521797
07082011	04	0.120	0.007	0.004	0.001	0.002	0.001	0.004	0.006	0.001	0.001	0.006	295.097	0.907	0.4000000	0.6883480	0.2093082E-06	3.517022
07082011	05	0.120	0.007	0.002	0.001	0.002	0.001	0.004	0.006	0.001	0.002	0.007	295.019	0.901	0.9737873E-01	0.4232651	0.1144592E-06	3.567962
07082011	06	0.123	0.008	0.003	0.001	0.002	0.001	0.005	0.007	0.001	0.002	0.007	295.043	0.898	0.4000000	0.6078084	0.1719111E-06	3.548463
07082011	07	0.126	0.008	0.000	0.003	0.002	0.002	0.005	0.008	0.002	0.009	0.007	296.253	0.898	NaN	3.305413	0.2928142E-09	7.052634
07082011	08	0.115	0.006	0.005	0.003	0.002	0.002	0.005	0.008	0.008	0.014	0.007	298.151	0.838	NaN	3.430672	0.7719216E-05	2.647806
07082011	09	0.123	0.017	0.012	0.000	0.002	0.001	0.002	0.004	0.003	0.001	0.007	299.558	0.792	NaN	1.760802	0.4075121E-05	2.635570
07082011	10	0.109	0.025	0.015	0.000	0.001	0.000	0.001	0.002	0.007	0.001	0.007	301.211	0.730	NaN	1.702548	0.1028184E-04	2.219029
07082011	11	0.084	0.019	0.015	0.000	0.000	0.000	0.001	0.001	0.010	0.000	0.006	302.347	0.679	NaN	1.297118	0.1205937E-04	2.031655
07082011	12	0.078	0.008	0.012	0.000	0.000	0.000	0.000	0.001	0.011	0.000	0.006	302.709	0.666	NaN	1.113113	0.1460012E-04	1.882183
07082011	13	0.112	0.002	0.009	0.000	0.000	0.000	0.001	0.001	0.012	0.000	0.007	303.269	0.649	NaN	0.9774290	0.1095632E-04	1.950421
07082011	14	0.130	0.001	0.008	0.000	0.000	0.000	0.001	0.001	0.013	0.000	0.008	303.447	0.647	NaN	1.032206	0.1233235E-04	1.922720
07082011	15	0.135	0.001	0.007	0.000	0.000	0.000	0.001	0.001	0.013	0.000	0.008	303.165	0.657	NaN	1.025276	0.1223134E-04	1.923367
07082011	16	0.128	0.001	0.006	0.000	0.000	0.000	0.001	0.001	0.013	0.000	0.008	302.829	0.665	NaN	1.015540	0.1332372E-04	1.882071
07082011	17	0.103	0.001	0.005	0.000	0.000	0.000	0.001	0.001	0.013	0.000	0.008	302.170	0.682	NaN	1.003024	0.1690936E-04	1.773184
07082011	18	0.096	0.001	0.004	0.000	0.000	0.000	0.001	0.002	0.012	0.000	0.008	301.328	0.744	NaN	1.068015	0.1462980E-04	1.863339
07082011	19	0.111	0.001	0.004	0.000	0.000	0.000	0.001	0.002	0.011	0.000	0.008	300.645	0.783	NaN	1.277818	0.1223981E-04	2.018694
07082011	20	0.111	0.002	0.004	0.001	0.000	0.001	0.002	0.003	0.009	0.000	0.009	299.484	0.776	0.1948923E-01	0.9760081	0.6666453E-05	2.165559
07082011	21	0.111	0.003	0.004	0.001	0.001	0.001	0.002	0.005	0.006	0.000	0.010	298.801	0.766	0.2670974E-01	0.8088505	0.3628098E-05	2.348189
07082011	22	0.119	0.004	0.005	0.001	0.001	0.001	0.003	0.007	0.003	0.000	0.011	298.306	0.774	0.3794301E-01	0.6563435	0.1002620E-05	2.815995
07082011	23	0.128	0.005	0.006	0.001	0.001	0.001	0.004	0.008	0.001	0.001	0.011	297.892	0.796	0.9132600E-01	0.5824077	0.1924702E-06	3.480864
07082011	24	0.135	0.005	0.006	0.001	0.001	0.001	0.004	0.008	0.001	0.001	0.011	297.468	0.830	0.1128197	0.6960588	0.2293215E-06	3.482201
07092011	01	0.136	0.005	0.006	0.001	0.001	0.001	0.004	0.008	0.002	0.001	0.011	297.000	0.874	0.1517243	0.9496871	0.3242297E-06	3.466728
07092011	02	0.126	0.005	0.005	0.001	0.001	0.001	0.004	0.008	0.002	0.002	0.012	296.701	0.902	0.1860821	1.623956	0.8797195E-06	3.266230
07092011	03	0.107	0.005	0.005	0.001	0.001	0.001	0.004	0.008	0.003	0.002	0.012	296.595	0.913	0.1900262	1.808667	0.1071602E-05	3.227325
07092011	04	0.093	0.005	0.005	0.001	0.001	0.001	0.004	0.007	0.004	0.001	0.012	296.569	0.917	0.1661761	2.324665	0.2378769E-05	2.990008
07092011	05	0.085	0.005	0.005	0.001	0.001	0.001	0.004	0.007	0.005	0.001	0.012	296.560	0.921	0.1556283	2.301196	0.2529141E-05	2.958981
07092011	06	0.087	0.006	0.005	0.001	0.001	0.001	0.004	0.007	0.005	0.001	0.012	296.657	0.924	0.1558665	2.301770	0.2491213E-05	2.965651
07092011	07	0.106	0.006	0.006	0.001	0.001	0.001	0.005	0.007	0.004	0.002	0.012	298.080	0.899	0.1282277	1.858679	0.1548416E-05	3.079317
07092011	08	0.114	0.004	0.008	0.001	0.001	0.001	0.004	0.007	0.003	0.002	0.011	300.053	0.852	0.5956841E-01	0.9839772	0.7443130E-06	3.121229
07092011	09	0.082	0.003	0.008	0.000	0.001	0.001	0.003	0.004	0.007	0.001	0.010	301.199	0.814	NaN	2.059166	0.1115197E-04	2.266340
07092011	10	0.059	0.008	0.009	0.000	0.000	0.000	0.001	0.002	0.013	0.000	0.010	302.618	0.754	NaN	1.753407	0.3970211E-04	1.645069
07092011	11	0.051	0.006	0.008	0.000	0.000	0.000	0.001	0.001	0.015	0.000	0.009	303.108	0.724	NaN	1.476637	0.4521021E-04	1.514037
07092011	12	0.076	0.001	0.006	0.000	0.000	0.000	0.000	0.001	0.012	0.000	0.007	303.829	0.687	NaN	0.9959607	0.2377701E-04	1.622085
07092011	13	0.105	0.001	0.004	0.000	0.000	0.000	0.000	0.001	0.009	0.000	0.006	304.791	0.648	NaN	0.6729543	0.1534729E-04	1.641954
07092011	14	0.117	0.001	0.004	0.000	0.000	0.000	0.000	0.001	0.008	0.000	0.005	305.018	0.637	NaN	0.5542887	0.1003296E-04	1.742307
07092011	15	0.126	0.001	0.003	0.000	0.000	0.000	0.000	0.001	0.008	0.000	0.005	304.667	0.644	NaN	0.5118851	0.1007826E-04	1.705787
07092011	16	0.127	0.000	0.003	0.000	0.000	0.000	0.000	0.000	0.008	0.000	0.005	304.587	0.641	0.2200007E-02	0.4821601	0.2100810E-04	1.360804
07092011	17	0.127	0.000	0.003	0.000	0.000	0.000	0.000	0.000	0.008	0.000	0.004	303.735	0.648	0.2279341E-02	0.3976143	0.1555257E-04	1.407660
07092011	18	0.125	0.001	0.003	0.000	0.000	0.000	0.000	0.000	0.008	0.000	0.005	301.767	0.752	0.7047594E-02	0.6963788	0.1537139E-04	1.656132
07092011	19	0.102	0.001	0.003	0.000	0.000	0.000	0.001	0.000	0.008	0.000	0.005	300.525	0.817	NaN	1.273708	0.1086267E-04	2.069133
07092011	20	0.053	0.002	0.002	0.001	0.000	0.000	0.001	0.000	0.010	0.000	0.006	299.287	0.822	0.1837254E-01	1.123310	0.1415621E-04	1.899552
07092011	21	0.030	0.003	0.002	0.001	0.000	0.000	0.001	0.000	0.014	0.000	0.008	298.516	0.837	0.2831686E-01	1.676441	0.2244390E-04	1.873290
07092011	22	0.030	0.003	0.002	0.001	0.000	0.000	0.001	0.001	0.016	0.000	0.009	298.213	0.838	0.2830040E-01	1.676440	0.2243715E-04	1.873420
07092011	23	0.058	0.002	0.002	0.001	0.000	0.000	0.001	0.000	0.018	0.000	0.010	298.013	0.842	0.3539181E-01	2.098381	0.2842991E-04	1.868109
07092011	24	0.092	0.002	0.002	0.001	0.000	0.000	0.001	0.000	0.017	0.000	0.009	297.744	0.862	0.4849005E-01	2.145111	0.1949138E-04	2.041607
07102011	01	0.112	0.002	0.002	0.001	0.000	0.000	0.001	0.000	0.016	0.000	0.009	297.460	0.883	0.7431418E-01	2.493080	0.1487564E-04	2.224261
07102011	02	0.115	0.001	0.002	0.001	0.000	0.000	0.001	0.000	0.014	0.000	0.008	297.172	0.904	0.9143203E-01	2.656544	0.1165928E-04	2.357645
07102011	03	0.121	0.001	0.002	0.001	0.000	0.000	0.001	0.000	0.013	0.000	0.007	297.003	0.904	0.8898401E-01	2.329804	0.9296449E-05	2.399002
07102011	04	0.134	0.001	0.002	0.001	0.000	0.000	0.001	0.000	0.012	0.000	0.006	296.860	0.901	0.8993942E-01	2.005318	0.6998141E-05	2.457201
07102011	05	0.145	0.001	0.002	0.001	0.000	0.000	0.001	0.000	0.011	0.000	0.006	296.712	0.906	0.1137404	2.245755	0.6249725E-05	2.555501
07102011	06	0.136	0.002	0.003	0.001	0.000	0.000	0.001	0.000	0.011	0.000	0.006	296.716	0.909	0.1086070	2.271588	0.6675708E-05	2.531832
07102011	07	0.114	0.003	0.004	0.001	0.000	0.000	0.002	0.000	0.013	0.001	0.007	297.794	0.908	0.9000063E-01	2.652197	0.8984608E-05	2.470107
07102011	08	0.063	0.002	0.006	0.001	0.000	0.000	0.001	0.000	0.015	0.000	0.009	299.022	0.875	0.3035951E-01	2.484811	0.3089176E-04	1.905451
07102011	09	0.033	0.002	0.006	0.000	0.000	0.000	0.001	0.000	0.017	0.000	0.009	300.140	0.838	NaN	2.657920	0.7471229E-04	1.551150
07102011	10	0.045	0.002	0.007	0.000	0.000	0.000	0.000	0.000	0.019	0.000	0.010	301.147	0.785	0.7276833E-02	1.639344	0.7723727E-04	1.326843
07102011	11	0.057	0.002	0.007	0.000	0.000	0.000	0.000	0.000	0.018	0.000	0.010	302.325	0.763	0.5857050E-02	1.447178	0.7052477E-04	1.312180
07102011	12	0.042	0.003	0.007	0.000	0.000	0.000	0.000	0.000	0.017	0.000	0.009	303.268	0.729	0.2702236E-02	1.164295	0.9537180E-04	1.086643
07102011	13	0.056	0.003	0.006	0.000	0.000	0.000	0.000	0.000	0.016	0.000	0.008	304.102	0.700	0.2335370E-02	0.9334890	0.6807104E-04	1.137147
07102011	14	0.074	0.002	0.005	0.000	0.000	0.000	0.000	0.000	0.014	0.000	0.007	304.350	0.688	0.2433360E-02	0.7900678	0.4622973E-04	1.232743
07102011	15	0.085	0.002	0.003	0.000	0.000	0.000	0.000	0.000	0.013	0.000	0.007	303.650	0.703	0.3404975E-02	0.8168029	0.3846208E-04	1.327085
07102011	16	0.070	0.002	0.003	0.000	0.000	0.000	0.000	0.000	0.011	0.000	0.006	302.694	0.728	0.3459930E-02	0.7761967	0.3625591E-04	1.330593
07102011	17	0.065	0.001	0.003	0.000	0.000	0.000	0.000	0.000	0.009	0.000	0.004	301.621	0.750	0.3128231E-02	0.5571031	0.2282590E-04	1.387508
07102011	18	0.065	0.001	0.003	0.000	0.000	0.000	0.000	0.000	0.007	0.000	0.004	300.547	0.772	0.4315794E-02	0.6024097	0.2113900E-04	1.454808
07102011	19	0.075	0.001	0.003	0.000	0.000	0.000	0.001	0.000	0.006	0.000	0.003	299.355	0.843	NaN	1.019737	0.7342399E-05	2.142650
07102011	20	0.077	0.001	0.002	0.000	0.000	0.000	0.001	0.000	0.005	0.000	0.003	298.101	0.877	NaN	1.198635	0.6508668E-05	2.265195
07102011	21	0.094	0.002	0.002	0.000	0.000	0.000	0.001	0.000	0.005	0.000	0.004	297.556	0.874	NaN	1.357642	0.7176850E-05	2.276851
07102011	22	0.123	0.002	0.002	0.000	0.000	0.000	0.001	0.000	0.007	0.000	0.004	297.195	0.887	NaN	1.615796	0.5135716E-05	2.497786
07102011	23	0.170	0.002	0.002	0.000	0.000	0.000	0.001	0.000	0.008	0.000	0.005	297.023	0.887	NaN	1.915601	0.4708701E-05	2.609404
07102011	24	0.225	0.003	0.003	0.000	0.000	0.000	0.001	0.000	0.008	0.000	0.005	296.888	0.888	NaN	2.133409	0.3647700E-05	2.767055
07112011	01	0.275	0.004	0.004	0.000	0.001	0.000	0.002	0.000	0.009	0.001	0.005	296.746	0.895	NaN	2.844149	0.2638723E-05	3.032558
07112011	02	0.302	0.005	0.004	0.000	0.001	0.000	0.002	0.000	0.010	0.001	0.006	296.668	0.899	NaN	3.171799	0.2896277E-05	3.039466
07112011	03	0.301	0.005	0.005	0.000	0.001	0.000	0.002	0.000	0.011	0.001	0.006	296.654	0.899	NaN	3.416205	0.3040241E-05	3.050636
07112011	04	0.289	0.006	0.006	0.000	0.000	0.000	0.002	0.000	0.012	0.002	0.006	296.661	0.896	NaN	3.897988	0.3673623E-05	3.025746
07112011	05	0.278	0.007	0.007	0.001	0.000	0.000	0.002	0.000	0.013	0.002	0.007	296.665	0.895	0.2444419	2.847453	0.3555489E-05	2.903557
07112011	06	0.270	0.009	0.008	0.001	0.000	0.000	0.002	0.000	0.016	0.003	0.008	296.738	0.895	0.2659965	3.355805	0.4365685E-05	2.885744
07112011	07	0.266	0.011	0.013	0.001	0.001	0.000	0.003	0.000	0.021	0.006	0.009	297.933	0.897	0.2758667	4.246892	0.5098425E-05	2.920635
07112011	08	0.201	0.009	0.029	0.002	0.001	0.001	0.003	0.000	0.026	0.009	0.010	299.605	0.862	0.1224354	3.148193	0.6965960E-05	2.655080
07112011	09	0.061	0.013	0.034	0.000	0.000	0.000	0.001	0.000	0.026	0.001	0.013	300.716	0.822	NaN	6.411633	0.1294851E-03	1.694749
07112011	10	0.038	0.020	0.028	0.000	0.000	0.000	0.001	0.000	0.029	0.000	0.015	302.339	0.764	NaN	4.256364	0.3367190E-03	1.101771
07112011	11	0.031	0.030	0.024	0.000	0.000	0.000	0.000	0.001	0.028	0.000	0.015	303.753	0.713	NaN	3.040330	0.4437346E-03	0.8357975
07112011	12	0.032	0.019	0.016	0.000	0.000	0.000	0.000	0.001	0.024	0.000	0.013	304.028	0.694	NaN	2.185209	0.1921525E-03	1.055847
07112011	13	0.077	0.005	0.009	0.000	0.000	0.000	0.000	0.000	0.019	0.000	0.010	304.907	0.663	0.2719641E-02	1.025641	0.6895410E-04	1.172435
07112011	14	0.113	0.001	0.006	0.000	0.000	0.000	0.000	0.000	0.016	0.000	0.009	305.120	0.658	0.3413677E-02	0.9230769	0.4283151E-04	1.333475
07112011	15	0.124	0.000	0.004	0.000	0.000	0.000	0.000	0.000	0.013	0.000	0.007	304.705	0.672	0.3395081E-02	0.7407408	0.2898556E-04	1.407485
07112011	16	0.112	0.000	0.003	0.000	0.000	0.000	0.000	0.000	0.011	0.000	0.006	304.229	0.681	0.3072262E-02	0.6557378	0.2646844E-04	1.394002
07112011	17	0.098	0.000	0.003	0.000	0.000	0.000	0.000	0.000	0.011	0.000	0.006	303.460	0.689	0.3353298E-02	0.6772009	0.2857773E-04	1.374690
07112011	18	0.099	0.001	0.003	0.000	0.000	0.000	0.001	0.001	0.010	0.000	0.006	302.286	0.753	NaN	0.9019315	0.1227994E-04	1.865977
07112011	19	0.085	0.001	0.003	0.001	0.000	0.000	0.001	0.001	0.011	0.000	0.007	301.378	0.771	0.1160121E-01	0.8927463	0.1284988E-04	1.841829
07112011	20	0.071	0.001	0.003	0.001	0.000	0.000	0.001	0.001	0.011	0.000	0.008	300.110	0.809	0.1661038E-01	1.248179	0.1829088E-04	1.834042
07112011	21	0.069	0.002	0.003	0.001	0.001	0.000	0.002	0.002	0.010	0.000	0.009	299.495	0.818	0.1727146E-01	1.316092	0.1801421E-04	1.863671
07112011	22	0.083	0.002	0.003	0.002	0.001	0.001	0.002	0.003	0.010	0.000	0.010	299.130	0.821	0.2486986E-01	1.362631	0.1043738E-04	2.115787
07112011	23	0.116	0.003	0.003	0.002	0.001	0.001	0.002	0.003	0.011	0.000	0.010	298.849	0.829	0.4633778E-01	1.442750	0.6835234E-05	2.324438
07112011	24	0.170	0.003	0.003	0.002	0.001	0.001	0.002	0.003	0.013	0.000	0.011	298.527	0.847	0.8359182E-01	1.855790	0.5809889E-05	2.504361
07122011	01	0.229	0.004	0.003	0.001	0.001	0.001	0.002	0.003	0.016	0.001	0.013	298.151	0.875	0.1639754	2.895582	0.5974553E-05	2.685431
07122011	02	0.266	0.005	0.003	0.001	0.001	0.001	0.003	0.003	0.020	0.001	0.014	297.930	0.889	0.2356380	3.505107	0.5116183E-05	2.835755
07122011	03	0.272	0.006	0.003	0.001	0.001	0.001	0.003	0.003	0.024	0.001	0.016	297.787	0.901	0.2976563	4.565033	0.6244454E-05	2.863950
07122011	04	0.270	0.007	0.003	0.001	0.001	0.001	0.003	0.003	0.029	0.002	0.018	297.753	0.905	0.3620688	5.973800	0.7548255E-05	2.898404
07122011	05	0.264	0.009	0.003	0.001	0.001	0.001	0.003	0.002	0.033	0.002	0.020	297.747	0.908	0.3892521	7.105582	0.9850349E-05	2.858148
07122011	06	0.255	0.011	0.004	0.001	0.002	0.001	0.003	0.002	0.036	0.002	0.021	297.830	0.913	0.3988539	7.599079	0.1071065E-04	2.850945
07122011	07	0.243	0.012	0.006	0.001	0.002	0.001	0.003	0.002	0.040	0.004	0.022	299.097	0.903	0.3069180	7.317100	0.1346722E-04	2.735061
07122011	08	0.197	0.018	0.014	0.001	0.002	0.001	0.003	0.002	0.042	0.005	0.023	300.913	0.875	0.1630595	6.381821	0.2083435E-04	2.486165
07122011	09	0.086	0.049	0.020	0.000	0.001	0.000	0.002	0.002	0.040	0.002	0.022	301.941	0.842	NaN	7.119247	0.7666634E-04	1.967829
07122011	10	0.078	0.041	0.019	0.000	0.001	0.000	0.001	0.001	0.028	0.001	0.016	303.017	0.801	NaN	4.544716	0.6974085E-04	1.814020
07122011	11	0.066	0.017	0.017	0.000	0.001	0.000	0.001	0.001	0.023	0.000	0.013	303.101	0.789	NaN	3.537256	0.6313445E-04	1.748400
07122011	12	0.059	0.003	0.011	0.000	0.000	0.000	0.000	0.001	0.017	0.000	0.009	303.430	0.777	NaN	2.205156	0.4661167E-04	1.674945
07122011	13	0.068	0.001	0.008	0.000	0.000	0.000	0.000	0.001	0.015	0.000	0.008	304.003	0.752	NaN	1.553751	0.3326712E-04	1.669366
07122011	14	0.087	0.001	0.006	0.000	0.000	0.000	0.000	0.001	0.015	0.000	0.008	304.158	0.744	NaN	1.350340	0.2610493E-04	1.713721
07122011	15	0.117	0.001	0.005	0.000	0.000	0.000	0.000	0.001	0.016	0.000	0.009	304.028	0.741	NaN	1.415903	0.2309369E-04	1.787540
07122011	16	0.100	0.002	0.005	0.000	0.000	0.000	0.000	0.001	0.016	0.000	0.009	303.645	0.741	NaN	1.415273	0.2659471E-04	1.726045
07122011	17	0.088	0.003	0.005	0.000	0.000	0.000	0.000	0.001	0.018	0.000	0.010	303.146	0.740	NaN	1.548178	0.3399794E-04	1.658368
07122011	18	0.095	0.006	0.005	0.001	0.000	0.000	0.001	0.001	0.021	0.000	0.012	302.597	0.760	0.1539731E-01	1.580736	0.2774881E-04	1.755615
07122011	19	0.072	0.007	0.004	0.001	0.001	0.000	0.001	0.002	0.023	0.000	0.014	301.879	0.786	0.2129859E-01	1.972351	0.3088774E-04	1.805198
07122011	20	0.062	0.007	0.003	0.002	0.001	0.000	0.001	0.002	0.023	0.000	0.015	300.361	0.803	0.2827388E-01	2.234814	0.3612500E-04	1.791434
07122011	21	0.054	0.007	0.002	0.002	0.001	0.000	0.002	0.002	0.023	0.000	0.015	299.607	0.804	0.3395474E-01	2.224126	0.3115916E-04	1.853574
07122011	22	0.045	0.007	0.002	0.003	0.002	0.000	0.002	0.003	0.021	0.000	0.015	298.903	0.834	0.3533036E-01	2.396813	0.3706736E-04	1.810643
07122011	23	0.040	0.006	0.002	0.003	0.002	0.001	0.002	0.003	0.019	0.000	0.015	298.617	0.828	0.3443485E-01	2.433459	0.3343245E-04	1.862056
07122011	24	0.042	0.006	0.002	0.003	0.002	0.001	0.002	0.004	0.017	0.000	0.015	298.155	0.851	0.3379017E-01	2.492414	0.3159979E-04	1.896936
07132011	01	0.054	0.007	0.002	0.002	0.002	0.001	0.002	0.004	0.015	0.000	0.014	297.796	0.865	0.4391289E-01	2.581159	0.2344491E-04	2.041766
07132011	02	0.077	0.008	0.002	0.002	0.002	0.001	0.003	0.004	0.013	0.001	0.013	297.480	0.874	0.6568599E-01	2.344670	0.1154101E-04	2.307838
07132011	03	0.096	0.009	0.003	0.002	0.002	0.001	0.003	0.004	0.012	0.001	0.013	297.281	0.878	0.9211093E-01	2.561495	0.9140310E-05	2.447533
07132011	04	0.108	0.011	0.003	0.001	0.003	0.001	0.003	0.004	0.011	0.001	0.013	297.122	0.881	0.1138812	2.581202	0.7473241E-05	2.538313
07132011	05	0.110	0.012	0.004	0.001	0.003	0.001	0.003	0.004	0.010	0.001	0.012	296.983	0.884	0.1182890	2.334671	0.5762812E-05	2.607591
07132011	06	0.106	0.012	0.004	0.001	0.003	0.001	0.003	0.004	0.009	0.001	0.012	296.900	0.892	0.1284474	2.540876	0.5946806E-05	2.630700
07132011	07	0.097	0.011	0.005	0.001	0.003	0.001	0.003	0.004	0.008	0.001	0.012	298.008	0.890	0.9156203E-01	2.513216	0.7188397E-05	2.543598
07132011	08	0.085	0.008	0.007	0.001	0.002	0.001	0.003	0.004	0.011	0.001	0.012	299.772	0.848	0.3571093E-01	1.847454	0.1014632E-04	2.260265
07132011	09	0.059	0.013	0.012	0.000	0.001	0.000	0.001	0.002	0.016	0.001	0.011	300.944	0.819	NaN	3.177485	0.4547805E-04	1.844282
07132011	10	0.084	0.009	0.010	0.000	0.001	0.000	0.001	0.001	0.017	0.000	0.011	302.368	0.767	NaN	2.326036	0.3334344E-04	1.843606
07132011	11	0.107	0.005	0.008	0.000	0.001	0.000	0.001	0.001	0.017	0.000	0.010	303.430	0.717	NaN	1.623224	0.2269365E-04	1.854474
07132011	12	0.151	0.003	0.007	0.000	0.000	0.000	0.001	0.001	0.016	0.000	0.010	304.929	0.660	NaN	1.229532	0.1752354E-04	1.846118
07132011	13	0.159	0.001	0.006	0.000	0.000	0.000	0.000	0.001	0.016	0.000	0.009	305.292	0.641	NaN	1.024093	0.1677242E-04	1.785743
07132011	14	0.182	0.000	0.003	0.000	0.000	0.000	0.000	0.000	0.013	0.000	0.007	304.916	0.667	0.4766345E-02	0.7407408	0.1987193E-04	1.571426
07132011	15	0.177	0.000	0.003	0.000	0.000	0.000	0.000	0.000	0.010	0.000	0.005	304.066	0.697	0.4677773E-02	0.5834306	0.1327764E-04	1.642868
07132011	16	0.138	0.000	0.003	0.000	0.000	0.000	0.000	0.000	0.009	0.000	0.005	303.195	0.723	0.4865646E-02	0.6242197	0.1584456E-04	1.595457
07132011	17	0.120	0.000	0.002	0.000	0.000	0.000	0.000	0.000	0.009	0.000	0.005	302.077	0.756	0.6717205E-02	0.7235890	0.1595713E-04	1.656537
07132011	18	0.135	0.000	0.002	0.000	0.000	0.000	0.000	0.000	0.009	0.000	0.005	300.859	0.818	0.1437771E-01	0.9451796	0.1160277E-04	1.910952
07132011	19	0.130	0.001	0.003	0.001	0.000	0.000	0.001	0.000	0.012	0.000	0.007	299.636	0.873	0.3940129E-01	1.794624	0.1173167E-04	2.184614
07132011	20	0.148	0.002	0.003	0.001	0.001	0.000	0.001	0.001	0.015	0.000	0.009	298.686	0.880	0.8234894E-01	2.250376	0.9778019E-05	2.362004
07132011	21	0.118	0.003	0.003	0.001	0.001	0.000	0.001	0.001	0.018	0.000	0.011	298.055	0.882	0.7926261E-01	2.795185	0.1609377E-04	2.239753
07132011	22	0.088	0.002	0.002	0.001	0.001	0.000	0.001	0.001	0.019	0.000	0.011	297.523	0.906	0.9840161E-01	3.679215	0.1838383E-04	2.301319
07132011	23	0.096	0.002	0.002	0.001	0.001	0.000	0.001	0.001	0.019	0.000	0.012	297.299	0.899	0.1031583	3.647391	0.1940330E-04	2.274107
07132011	24	0.109	0.003	0.002	0.001	0.001	0.000	0.002	0.002	0.018	0.000	0.012	296.858	0.928	0.1930900	4.828631	0.1222904E-04	2.596432
07142011	01	0.113	0.003	0.002	0.001	0.001	0.001	0.002	0.003	0.016	0.001	0.012	296.574	0.940	0.2606059	5.220622	0.8357619E-05	2.795640
07142011	02	0.113	0.004	0.002	0.001	0.002	0.001	0.002	0.004	0.014	0.001	0.013	296.474	0.925	0.2308595	4.432963	0.7853637E-05	2.751623
07142011	03	0.107	0.006	0.003	0.002	0.002	0.001	0.003	0.005	0.011	0.001	0.013	296.267	0.939	0.2863014	4.947115	0.6244920E-05	2.898825
07142011	04	0.090	0.007	0.003	0.002	0.002	0.001	0.003	0.006	0.010	0.001	0.013	296.081	0.965	0.5424708	10.58533	0.7995016E-05	3.121885
07142011	05	0.068	0.007	0.003	0.002	0.002	0.001	0.003	0.006	0.009	0.001	0.013	296.019	0.971	0.4651571	10.11780	0.1004900E-04	3.002963
07142011	06	0.064	0.007	0.003	0.002	0.002	0.001	0.004	0.006	0.009	0.001	0.013	296.078	0.974	0.4769450	10.19646	0.9451265E-05	3.032959
07142011	07	0.052	0.007	0.004	0.002	0.002	0.001	0.004	0.005	0.014	0.002	0.014	297.190	0.952	0.1979834	6.550346	0.1450591E-04	2.654719
07142011	08	0.043	0.005	0.008	0.001	0.001	0.001	0.002	0.003	0.022	0.001	0.015	298.570	0.910	0.6111252E-01	4.445734	0.3710488E-04	2.078512
07142011	09	0.043	0.006	0.009	0.000	0.000	0.000	0.001	0.001	0.019	0.000	0.011	299.776	0.875	NaN	4.444860	0.6658636E-04	1.824473
07142011	10	0.027	0.013	0.006	0.000	0.000	0.000	0.000	0.000	0.008	0.000	0.004	301.225	0.821	0.2149165E-02	0.7561437	0.4798311E-04	1.197516
07142011	11	0.051	0.019	0.006	0.000	0.000	0.000	0.000	0.000	0.002	0.000	0.001	302.877	0.761	0.4807115E-03	0.1447178	0.7918639E-05	1.261871
07142011	12	0.057	0.020	0.014	0.000	0.000	0.000	0.000	0.000	0.008	0.000	0.004	303.672	0.717	0.1448274E-02	0.4993758	0.3163569E-04	1.198250
07142011	13	0.067	0.007	0.013	0.000	0.000	0.000	0.000	0.000	0.015	0.000	0.007	303.883	0.696	0.2610505E-02	0.8168029	0.4821473E-04	1.228938
07142011	14	0.076	0.003	0.012	0.000	0.000	0.000	0.000	0.000	0.017	0.000	0.008	303.936	0.690	0.3178358E-02	0.9029346	0.4941586E-04	1.261790
07142011	15	0.062	0.001	0.013	0.000	0.000	0.000	0.000	0.000	0.017	0.000	0.008	303.311	0.716	0.3473818E-02	0.9987516	0.5582723E-04	1.252611
07142011	16	0.050	0.001	0.013	0.000	0.000	0.000	0.000	0.000	0.016	0.000	0.008	302.931	0.730	0.3161252E-02	1.034929	0.6783562E-04	1.183453
07142011	17	0.053	0.001	0.013	0.000	0.000	0.000	0.000	0.000	0.015	0.000	0.007	302.426	0.737	0.3533363E-02	0.9395974	0.5229919E-04	1.254447
07142011	18	0.056	0.001	0.012	0.000	0.000	0.000	0.000	0.000	0.015	0.000	0.008	302.008	0.735	0.4518688E-02	1.073826	0.5707112E-04	1.274517
07142011	19	0.053	0.001	0.010	0.000	0.000	0.000	0.000	0.000	0.014	0.000	0.008	301.275	0.744	0.4945874E-02	1.073826	0.5866761E-04	1.262535
07142011	20	0.043	0.001	0.007	0.000	0.000	0.000	0.000	0.000	0.014	0.000	0.007	300.166	0.772	0.5515337E-02	1.054217	0.5371846E-04	1.292806
07142011	21	0.029	0.000	0.004	0.000	0.000	0.000	0.000	0.000	0.014	0.000	0.007	299.569	0.764	0.4031718E-02	1.013025	0.7798695E-04	1.113598
07142011	22	0.036	0.001	0.003	0.000	0.000	0.000	0.000	0.000	0.012	0.000	0.007	298.565	0.829	0.1013905E-01	1.394422	0.5196149E-04	1.428713
07142011	23	0.028	0.002	0.002	0.000	0.000	0.000	0.000	0.000	0.013	0.000	0.006	297.882	0.885	0.1367307E-01	1.796407	0.4302634E-04	1.620670
07142011	24	0.020	0.002	0.002	0.000	0.000	0.000	0.000	0.000	0.012	0.000	0.006	297.558	0.889	0.1015753E-01	1.796407	0.6052768E-04	1.472451
07152011	01	0.037	0.002	0.002	0.000	0.000	0.000	0.000	0.000	0.009	0.000	0.005	296.933	0.944	0.3975064E-01	2.732240	0.2244722E-04	2.085356
07152011	02	0.043	0.001	0.002	0.000	0.000	0.000	0.000	0.000	0.009	0.000	0.005	296.613	0.958	0.9141099E-01	4.277910	0.1827240E-04	2.369436
07152011	03	0.023	0.002	0.002	0.000	0.000	0.000	0.000	0.000	0.008	0.000	0.004	296.296	0.970	0.7026857E-01	4.630562	0.2652834E-04	2.241924
07152011	04	0.013	0.002	0.002	0.000	0.000	0.000	0.000	0.000	0.006	0.000	0.003	296.141	0.972	0.3221297E-01	3.448276	0.3439788E-04	2.001070
07152011	05	0.013	0.003	0.002	0.000	0.000	0.000	0.000	0.000	0.006	0.000	0.003	296.052	0.972	0.3280145E-01	3.448276	0.3414284E-04	2.004302
07152011	06	0.020	0.004	0.004	0.000	0.000	0.000	0.000	0.000	0.007	0.000	0.004	296.033	0.977	0.1227220	7.676705	0.3590802E-04	2.329983
07152011	07	0.025	0.007	0.006	0.000	0.001	0.000	0.001	0.000	0.010	0.000	0.006	296.738	0.962	NaN	9.133187	0.6427599E-04	2.152574
07152011	08	0.006	0.016	0.007	0.000	0.000	0.000	0.000	0.000	0.019	0.000	0.011	297.717	0.923	0.6284833E-02	4.489796	0.4721972E-03	0.9781032
07152011	09	0.002	0.011	0.007	0.000	0.000	0.000	0.000	0.000	0.023	0.000	0.013	297.412	0.918	0.2902877E-01	5.271046	0.4636616E-03	1.055696
07152011	10	0.004	0.007	0.009	0.000	0.000	0.000	0.000	0.000	0.027	0.000	0.014	297.876	0.909	0.6964624E-02	5.090909	0.5930627E-03	0.9336947
07152011	11	0.017	0.009	0.014	0.000	0.000	0.000	0.000	0.000	0.027	0.000	0.014	298.398	0.877	0.1505148E-01	3.856749	0.1908479E-03	1.305534
07152011	12	0.027	0.009	0.019	0.000	0.000	0.000	0.000	0.000	0.028	0.000	0.015	298.540	0.865	0.2211952E-01	3.838249	0.1368235E-03	1.447973
07152011	13	0.027	0.010	0.020	0.000	0.000	0.000	0.000	0.000	0.032	0.001	0.016	299.250	0.854	0.1664382E-01	3.579419	0.1542391E-03	1.365618
07152011	14	0.028	0.011	0.019	0.000	0.000	0.000	0.000	0.000	0.033	0.000	0.017	298.441	0.846	0.2249503E-01	3.803587	0.1515960E-03	1.399506
07152011	15	0.040	0.009	0.020	0.000	0.000	0.000	0.000	0.000	0.032	0.001	0.016	299.151	0.823	0.1994389E-01	3.038336	0.1107855E-03	1.438153
07152011	16	0.037	0.009	0.021	0.000	0.000	0.000	0.000	0.000	0.029	0.000	0.015	298.127	0.827	0.2268493E-01	3.012387	0.1051896E-03	1.456938
07152011	17	0.023	0.008	0.022	0.000	0.000	0.000	0.000	0.000	0.028	0.000	0.015	298.010	0.833	0.1332408E-01	2.988048	0.1803713E-03	1.219220
07152011	18	0.009	0.006	0.019	0.000	0.000	0.000	0.000	0.000	0.033	0.000	0.017	297.248	0.845	0.8999527E-02	3.803132	0.4302818E-03	0.9463884
07152011	19	0.024	0.006	0.018	0.000	0.000	0.000	0.000	0.000	0.034	0.001	0.018	296.837	0.844	0.2391219E-01	3.797468	0.1824866E-03	1.318263
07152011	20	0.032	0.005	0.015	0.001	0.000	0.000	0.000	0.000	0.033	0.001	0.017	296.546	0.832	0.3137589E-01	3.411876	0.1223593E-03	1.445356
07152011	21	0.039	0.004	0.011	0.001	0.001	0.001	0.001	0.000	0.027	0.001	0.015	296.224	0.825	0.4216564E-01	3.070465	0.6350275E-04	1.684412
07152011	22	0.044	0.004	0.009	0.001	0.001	0.001	0.001	0.001	0.025	0.001	0.014	295.631	0.827	0.4987782E-01	2.678685	0.4284779E-04	1.795993
07152011	23	0.043	0.004	0.008	0.002	0.001	0.001	0.001	0.001	0.026	0.001	0.015	295.089	0.831	0.5713129E-01	2.881647	0.4719884E-04	1.785709
07152011	24	0.040	0.004	0.007	0.002	0.001	0.001	0.001	0.001	0.029	0.001	0.017	294.597	0.833	0.6482017E-01	3.277955	0.5909223E-04	1.744073
07162011	01	0.038	0.004	0.007	0.003	0.001	0.001	0.002	0.002	0.034	0.001	0.021	294.168	0.829	0.7910246E-01	3.880131	0.6996200E-04	1.743984
07162011	02	0.035	0.004	0.007	0.003	0.001	0.001	0.002	0.003	0.037	0.001	0.023	293.866	0.824	0.7854813E-01	3.873150	0.7836927E-04	1.693919
07162011	03	0.034	0.004	0.007	0.003	0.001	0.001	0.003	0.004	0.038	0.002	0.024	293.585	0.839	0.9881401E-01	4.342093	0.6798426E-04	1.805291
07162011	04	0.036	0.004	0.006	0.003	0.001	0.001	0.003	0.004	0.037	0.002	0.025	293.353	0.859	0.1217182	5.161247	0.7014903E-04	1.866733
07162011	05	0.038	0.004	0.005	0.003	0.001	0.001	0.003	0.005	0.038	0.002	0.025	293.193	0.869	0.1472471	5.297500	0.5585086E-04	1.977041
07162011	06	0.038	0.005	0.006	0.003	0.001	0.001	0.003	0.005	0.038	0.003	0.026	292.985	0.893	0.1833742	6.646464	0.5942591E-04	2.048615
07162011	07	0.036	0.006	0.007	0.002	0.001	0.001	0.003	0.006	0.039	0.003	0.026	293.297	0.905	0.2140926	7.835342	0.5413324E-04	2.160594
07162011	08	0.034	0.007	0.009	0.002	0.001	0.001	0.003	0.006	0.039	0.004	0.027	293.511	0.906	0.1954516	8.289221	0.6607092E-04	2.098503
07162011	09	0.032	0.010	0.011	0.002	0.001	0.001	0.003	0.006	0.040	0.004	0.027	294.319	0.886	0.1296738	6.661261	0.7466318E-04	1.950450
07162011	10	0.024	0.014	0.016	0.002	0.001	0.001	0.003	0.006	0.047	0.004	0.031	295.773	0.843	0.5395144E-01	5.379385	0.1530587E-03	1.545875
07162011	11	0.013	0.019	0.021	0.002	0.001	0.001	0.003	0.005	0.058	0.003	0.036	296.970	0.810	0.3167421E-01	5.601072	0.2990752E-03	1.272491
07162011	12	0.005	0.019	0.022	0.002	0.001	0.001	0.002	0.004	0.058	0.002	0.036	297.761	0.778	0.2471209E-03	6.324639	0.4733166E-02	0.1258840
07162011	13	0.006	0.017	0.020	0.001	0.001	0.001	0.002	0.004	0.056	0.002	0.033	298.403	0.759	0.2520651E-01	4.246148	0.2310188E-03	1.264348
07162011	14	0.010	0.019	0.020	0.001	0.001	0.001	0.002	0.004	0.051	0.001	0.031	299.725	0.718	0.1969540E-01	3.423530	0.1705173E-03	1.302706
07162011	15	0.007	0.026	0.021	0.001	0.001	0.001	0.002	0.003	0.046	0.001	0.028	300.538	0.696	0.1616549E-01	2.969543	0.1443765E-03	1.313193
07162011	16	0.006	0.030	0.020	0.001	0.001	0.001	0.001	0.003	0.041	0.001	0.026	299.644	0.696	0.1618290E-01	2.750383	0.1467856E-03	1.272710
07162011	17	0.015	0.030	0.016	0.001	0.001	0.001	0.001	0.003	0.039	0.001	0.024	300.198	0.682	0.1514059E-01	2.361912	0.1107406E-03	1.328957
07162011	18	0.019	0.025	0.014	0.001	0.001	0.001	0.001	0.003	0.034	0.001	0.022	299.631	0.693	0.1541913E-01	2.211474	0.9956650E-04	1.346569
07162011	19	0.033	0.014	0.010	0.001	0.001	0.001	0.002	0.004	0.031	0.000	0.021	299.078	0.738	0.1941776E-01	2.333167	0.7538281E-04	1.490673
07162011	20	0.054	0.008	0.007	0.002	0.001	0.001	0.002	0.004	0.029	0.000	0.020	298.149	0.718	0.2214736E-01	2.051018	0.6263067E-04	1.515182
07162011	21	0.059	0.006	0.005	0.002	0.001	0.001	0.002	0.005	0.025	0.000	0.020	297.185	0.770	0.3445309E-01	2.312106	0.4626138E-04	1.698789
07162011	22	0.050	0.006	0.003	0.003	0.001	0.001	0.002	0.006	0.018	0.000	0.017	296.962	0.763	0.2375102E-01	1.641228	0.3433927E-04	1.679378
07162011	23	0.043	0.006	0.003	0.003	0.001	0.001	0.002	0.006	0.013	0.001	0.015	296.304	0.816	0.2819806E-01	1.741688	0.2614765E-04	1.823538
07162011	24	0.039	0.006	0.002	0.003	0.001	0.001	0.002	0.006	0.012	0.001	0.014	296.217	0.819	0.2469081E-01	1.548766	0.2286409E-04	1.830832
07172011	01	0.036	0.007	0.002	0.003	0.001	0.001	0.002	0.005	0.011	0.000	0.012	295.548	0.876	0.4121375E-01	1.942427	0.1654409E-04	2.069702
07172011	02	0.036	0.008	0.002	0.002	0.001	0.001	0.002	0.004	0.010	0.000	0.011	295.349	0.886	0.4683554E-01	2.101529	0.1651081E-04	2.104767
07172011	03	0.039	0.007	0.002	0.002	0.001	0.001	0.002	0.004	0.009	0.000	0.010	295.276	0.883	0.4359990E-01	1.668384	0.1120753E-04	2.172786
07172011	04	0.042	0.007	0.002	0.002	0.001	0.001	0.002	0.004	0.009	0.000	0.011	295.221	0.881	0.4872406E-01	1.944517	0.1461127E-04	2.124124
07172011	05	0.041	0.006	0.002	0.002	0.001	0.001	0.002	0.005	0.010	0.001	0.012	295.220	0.875	0.4890317E-01	1.954091	0.1464421E-04	2.125279
07172011	06	0.038	0.006	0.002	0.003	0.001	0.001	0.002	0.005	0.011	0.001	0.013	295.235	0.873	0.4336780E-01	2.071956	0.2074714E-04	1.999422
07172011	07	0.037	0.007	0.003	0.003	0.002	0.001	0.003	0.006	0.010	0.001	0.014	295.799	0.864	0.4063499E-01	1.946838	0.1721705E-04	2.053371
07172011	08	0.025	0.013	0.005	0.003	0.002	0.001	0.002	0.005	0.012	0.001	0.014	296.997	0.822	0.1735449E-01	1.749138	0.3911247E-04	1.650509
07172011	09	0.016	0.023	0.006	0.002	0.001	0.000	0.001	0.003	0.026	0.001	0.017	298.404	0.759	0.2110469E-01	2.031658	0.6871487E-04	1.470800
07172011	10	0.018	0.034	0.010	0.002	0.001	0.000	0.001	0.002	0.031	0.001	0.019	299.667	0.697	0.1622277E-01	1.987096	0.8485931E-04	1.369519
07172011	11	0.020	0.039	0.014	0.001	0.001	0.000	0.001	0.002	0.031	0.001	0.019	300.806	0.643	0.1137167E-01	1.639005	0.8285607E-04	1.296256
07172011	12	0.024	0.041	0.016	0.001	0.001	0.000	0.001	0.002	0.030	0.000	0.018	301.921	0.594	0.8613706E-02	1.329289	0.6803083E-04	1.290914
07172011	13	0.028	0.043	0.017	0.000	0.001	0.000	0.001	0.003	0.030	0.000	0.019	303.100	0.543	NaN	1.586846	0.2902833E-03	0.7377129
07172011	14	0.031	0.041	0.017	0.000	0.001	0.000	0.001	0.003	0.031	0.000	0.019	303.615	0.520	NaN	1.486146	0.2175550E-03	0.8344923
07172011	15	0.040	0.036	0.016	0.000	0.001	0.000	0.001	0.003	0.030	0.000	0.019	302.981	0.521	NaN	1.466573	0.1374769E-03	1.028074
07172011	16	0.077	0.029	0.014	0.000	0.001	0.001	0.001	0.004	0.026	0.000	0.018	301.259	0.579	NaN	1.641862	0.3697886E-04	1.647383
07172011	17	0.118	0.023	0.012	0.001	0.001	0.001	0.002	0.006	0.018	0.000	0.017	302.091	0.549	0.6450236E-02	0.8525919	0.2561894E-04	1.522180
07172011	18	0.091	0.024	0.012	0.001	0.001	0.001	0.002	0.006	0.015	0.000	0.016	301.290	0.563	0.5833983E-02	0.8007938	0.2687245E-04	1.474213
07172011	19	0.098	0.018	0.009	0.001	0.001	0.002	0.003	0.009	0.006	0.000	0.015	300.258	0.622	0.1249731E-01	0.6405406	0.2653006E-05	2.382808
07172011	20	0.103	0.014	0.007	0.001	0.001	0.002	0.005	0.014	0.000	0.001	0.014	299.094	0.610	0.000000	0.4279895E-08	0.3480676E-18	7.089769
07172011	21	0.088	0.015	0.003	0.003	0.002	0.003	0.006	0.018	0.000	0.004	0.014	298.060	0.638	0.2857143	0.1282322	0.1011444E-07	4.103055
07172011	22	0.074	0.018	0.000	0.007	0.002	0.004	0.007	0.021	0.000	0.010	0.013	297.236	0.681	NaN	1.879436	0.1505556E-09	7.096331
07172011	23	0.063	0.020	0.000	0.009	0.002	0.004	0.007	0.022	0.000	0.013	0.013	296.693	0.707	NaN	2.638004	0.2108924E-09	7.097215
07172011	24	0.054	0.021	0.000	0.010	0.002	0.003	0.007	0.021	0.000	0.015	0.012	296.125	0.753	NaN	3.352848	0.2706421E-09	7.093019
07182011	01	0.046	0.019	0.000	0.011	0.002	0.003	0.006	0.020	0.000	0.017	0.012	295.403	0.818	NaN	4.733211	0.3872288E-09	7.087188
07182011	02	0.047	0.017	0.000	0.011	0.002	0.003	0.006	0.020	0.000	0.018	0.012	294.989	0.850	NaN	5.649184	0.4635765E-09	7.085864
07182011	03	0.042	0.016	0.000	0.011	0.002	0.003	0.006	0.019	0.000	0.019	0.012	294.739	0.865	NaN	6.281265	0.9250197E-06	3.831896
07182011	04	0.038	0.015	0.000	0.010	0.002	0.002	0.006	0.019	0.001	0.019	0.011	294.604	0.871	NaN	6.056041	0.4467205E-06	4.132153
07182011	05	0.040	0.015	0.000	0.010	0.002	0.002	0.006	0.019	0.001	0.020	0.011	294.534	0.876	NaN	6.535574	0.1136918E-05	3.759555
07182011	06	0.043	0.015	0.000	0.010	0.002	0.002	0.006	0.021	0.001	0.022	0.011	294.560	0.878	NaN	7.194075	0.5900009E-09	7.086123
07182011	07	0.042	0.015	0.000	0.010	0.002	0.003	0.007	0.023	0.001	0.027	0.012	295.365	0.868	NaN	7.870103	0.6622674E-09	7.074947
07182011	08	0.043	0.018	0.000	0.009	0.002	0.003	0.006	0.022	0.016	0.044	0.012	297.040	0.817	0.9293054	7.346706	0.2798865E-04	2.419111
07182011	09	0.056	0.034	0.021	0.003	0.002	0.002	0.004	0.014	0.009	0.015	0.012	298.606	0.756	0.000000	0.1414283E-08	0.1000035E-13	2.150522
07182011	10	0.053	0.078	0.029	0.001	0.002	0.001	0.003	0.009	0.005	0.003	0.013	300.110	0.687	0.1285285E-01	0.5283920	0.1551035E-05	2.532335
07182011	11	0.048	0.105	0.031	0.001	0.001	0.001	0.002	0.007	0.014	0.002	0.016	301.270	0.640	0.4130304E-02	0.9161034	0.3900178E-04	1.370860
07182011	12	0.056	0.103	0.029	0.001	0.001	0.001	0.002	0.006	0.018	0.002	0.017	302.507	0.598	0.4106522E-02	0.9846795	0.4473446E-04	1.342653
07182011	13	0.050	0.074	0.022	0.001	0.001	0.001	0.002	0.005	0.032	0.002	0.023	303.191	0.575	0.6928504E-02	1.453333	0.6663572E-04	1.338658
07182011	14	0.047	0.047	0.017	0.001	0.001	0.001	0.002	0.004	0.043	0.002	0.027	303.440	0.565	0.9610951E-02	1.793918	0.7649565E-04	1.370166
07182011	15	0.055	0.026	0.014	0.001	0.001	0.001	0.001	0.004	0.044	0.001	0.027	303.312	0.566	0.1135319E-01	1.868259	0.7347810E-04	1.405279
07182011	16	0.068	0.012	0.009	0.000	0.001	0.000	0.001	0.003	0.040	0.001	0.024	303.189	0.571	NaN	1.947177	0.1132817E-03	1.235246
07182011	17	0.060	0.007	0.007	0.000	0.001	0.000	0.001	0.002	0.034	0.001	0.020	302.957	0.578	NaN	1.702968	0.1083416E-03	1.196411
07182011	18	0.050	0.006	0.007	0.000	0.001	0.000	0.001	0.002	0.030	0.000	0.018	302.718	0.582	NaN	1.508599	0.1144417E-03	1.119990
07182011	19	0.060	0.006	0.007	0.000	0.001	0.000	0.001	0.002	0.029	0.000	0.018	302.073	0.588	NaN	1.558795	0.9077691E-04	1.234814
07182011	20	0.100	0.005	0.006	0.000	0.001	0.000	0.001	0.002	0.028	0.000	0.017	300.244	0.643	NaN	1.696923	0.4205122E-04	1.605884
07182011	21	0.131	0.004	0.005	0.000	0.001	0.000	0.002	0.002	0.027	0.000	0.016	298.700	0.701	NaN	1.902059	0.2282693E-04	1.920776
07182011	22	0.127	0.004	0.004	0.001	0.001	0.001	0.002	0.002	0.026	0.000	0.017	297.947	0.704	0.4476637E-01	1.810047	0.2506935E-04	1.858547
07182011	23	0.112	0.004	0.003	0.002	0.001	0.001	0.002	0.003	0.025	0.000	0.017	297.074	0.766	0.6271696E-01	2.169849	0.2138264E-04	2.006368
07182011	24	0.107	0.005	0.003	0.002	0.001	0.001	0.002	0.003	0.022	0.000	0.016	296.860	0.765	0.5989647E-01	2.018705	0.2042053E-04	1.995006
07192011	01	0.102	0.005	0.003	0.002	0.001	0.001	0.003	0.003	0.020	0.001	0.016	296.173	0.830	0.9566116E-01	2.658953	0.1695128E-04	2.195508
07192011	02	0.093	0.006	0.003	0.002	0.002	0.001	0.003	0.004	0.019	0.001	0.015	295.891	0.846	0.1051493	2.552685	0.1239767E-04	2.313657
07192011	03	0.083	0.007	0.003	0.002	0.002	0.001	0.003	0.004	0.019	0.001	0.015	295.580	0.869	0.1199750	2.917989	0.1307729E-04	2.348566
07192011	04	0.075	0.007	0.003	0.002	0.002	0.001	0.003	0.004	0.018	0.001	0.015	295.473	0.862	0.1016464	2.712188	0.1472236E-04	2.265342
07192011	05	0.073	0.008	0.004	0.002	0.002	0.001	0.003	0.004	0.018	0.001	0.015	295.267	0.884	0.1248420	3.166360	0.1442745E-04	2.341371
07192011	06	0.081	0.008	0.004	0.002	0.002	0.001	0.003	0.004	0.018	0.001	0.015	295.164	0.906	0.1969618	4.289303	0.1242709E-04	2.538017
07192011	07	0.093	0.009	0.005	0.002	0.002	0.001	0.003	0.004	0.018	0.002	0.016	296.361	0.886	0.1439022	3.822499	0.1440400E-04	2.423864
07192011	08	0.078	0.011	0.008	0.001	0.002	0.001	0.003	0.004	0.020	0.001	0.016	297.885	0.860	0.6795621E-01	2.967704	0.1965194E-04	2.179015
07192011	09	0.056	0.015	0.011	0.001	0.002	0.000	0.002	0.002	0.024	0.001	0.016	299.663	0.807	0.2239126E-01	2.537908	0.5893101E-04	1.634132
07192011	10	0.048	0.017	0.013	0.000	0.001	0.000	0.001	0.002	0.025	0.001	0.015	301.470	0.735	NaN	2.705295	0.8366907E-04	1.509650
07192011	11	0.044	0.020	0.016	0.000	0.001	0.000	0.001	0.001	0.026	0.000	0.015	303.146	0.663	NaN	2.167672	0.1141899E-03	1.278366
07192011	12	0.049	0.018	0.016	0.000	0.001	0.000	0.001	0.001	0.026	0.000	0.014	304.324	0.626	NaN	1.855144	0.8497159E-04	1.339104
07192011	13	0.062	0.016	0.015	0.000	0.000	0.000	0.001	0.001	0.026	0.000	0.014	305.533	0.586	NaN	1.561133	0.6452778E-04	1.383693
07192011	14	0.077	0.014	0.014	0.000	0.000	0.000	0.001	0.001	0.026	0.000	0.014	306.043	0.570	NaN	1.426405	0.4985733E-04	1.456514
07192011	15	0.102	0.008	0.012	0.000	0.000	0.000	0.001	0.001	0.026	0.000	0.014	305.097	0.591	NaN	1.462733	0.3683480E-04	1.598907
07192011	16	0.151	0.003	0.008	0.000	0.000	0.000	0.001	0.001	0.025	0.000	0.014	304.612	0.606	NaN	1.420324	0.2735436E-04	1.715361
07192011	17	0.145	0.002	0.007	0.000	0.000	0.000	0.001	0.001	0.022	0.000	0.012	304.201	0.609	NaN	1.207313	0.2261886E-04	1.727349
07192011	18	0.131	0.001	0.006	0.000	0.000	0.000	0.001	0.001	0.020	0.000	0.011	303.695	0.601	NaN	1.046126	0.2223853E-04	1.672478
07192011	19	0.142	0.001	0.004	0.000	0.000	0.000	0.001	0.001	0.017	0.000	0.010	302.385	0.646	NaN	1.052643	0.1843631E-04	1.756607
07192011	20	0.133	0.001	0.003	0.000	0.000	0.000	0.001	0.001	0.014	0.000	0.008	300.860	0.695	NaN	0.9699288	0.1318313E-04	1.866721
07192011	21	0.088	0.001	0.002	0.000	0.000	0.000	0.001	0.001	0.013	0.000	0.008	299.935	0.711	NaN	0.9464846	0.2028532E-04	1.668932
07192011	22	0.061	0.000	0.002	0.000	0.000	0.000	0.001	0.001	0.012	0.000	0.007	299.340	0.739	NaN	0.9281532	0.2232324E-04	1.618862
07192011	23	0.057	0.001	0.002	0.000	0.000	0.000	0.001	0.001	0.011	0.000	0.006	299.047	0.749	NaN	0.8279389	0.1790605E-04	1.664998
07192011	24	0.066	0.001	0.002	0.000	0.000	0.000	0.001	0.001	0.010	0.000	0.006	298.687	0.777	NaN	0.9456493	0.1449841E-04	1.814410
07202011	01	0.082	0.001	0.002	0.001	0.000	0.000	0.001	0.001	0.011	0.000	0.007	298.386	0.809	0.1891184E-01	1.068323	0.1568669E-04	1.833171
07202011	02	0.103	0.003	0.003	0.001	0.001	0.000	0.001	0.002	0.011	0.000	0.008	298.095	0.837	0.3178930E-01	1.277943	0.1098474E-04	2.065722
07202011	03	0.124	0.004	0.003	0.001	0.001	0.000	0.002	0.002	0.010	0.000	0.009	297.905	0.852	0.5055350E-01	1.576522	0.9094143E-05	2.238938
07202011	04	0.149	0.004	0.003	0.001	0.001	0.001	0.002	0.003	0.010	0.001	0.010	297.731	0.864	0.8047336E-01	1.738387	0.5048189E-05	2.537011
07202011	05	0.168	0.005	0.003	0.002	0.002	0.001	0.003	0.004	0.009	0.001	0.011	297.573	0.876	0.1344573	2.062503	0.3244986E-05	2.803182
07202011	06	0.157	0.005	0.003	0.002	0.002	0.001	0.003	0.005	0.009	0.001	0.012	297.488	0.889	0.1433128	2.245566	0.3434769E-05	2.815428
07202011	07	0.081	0.002	0.003	0.003	0.002	0.001	0.003	0.004	0.014	0.001	0.013	298.491	0.877	0.6795144E-01	2.542191	0.1134118E-04	2.350550
07202011	08	0.035	0.001	0.003	0.001	0.001	0.000	0.001	0.002	0.016	0.000	0.012	299.419	0.870	0.3167838E-01	2.556688	0.3208767E-04	1.901340
07202011	09	0.019	0.002	0.004	0.000	0.000	0.000	0.001	0.001	0.018	0.000	0.011	300.175	0.850	NaN	2.732650	0.1626960E-03	1.225207
07202011	10	0.015	0.003	0.006	0.000	0.000	0.000	0.000	0.001	0.021	0.000	0.012	301.250	0.822	NaN	2.652438	0.3501715E-03	0.8793644
07202011	11	0.032	0.002	0.006	0.000	0.000	0.000	0.001	0.001	0.022	0.000	0.012	302.368	0.775	NaN	2.210992	0.1111836E-03	1.298547
07202011	12	0.042	0.001	0.007	0.000	0.000	0.000	0.001	0.001	0.023	0.000	0.013	303.025	0.745	NaN	2.151314	0.9756748E-04	1.343399
07202011	13	0.052	0.001	0.006	0.000	0.000	0.000	0.000	0.001	0.023	0.000	0.013	303.671	0.720	NaN	1.856960	0.8911441E-04	1.318855
07202011	14	0.061	0.000	0.005	0.000	0.000	0.000	0.000	0.001	0.021	0.000	0.011	303.697	0.718	NaN	1.550138	0.5865610E-04	1.422057
07202011	15	0.066	0.000	0.004	0.000	0.000	0.000	0.000	0.000	0.018	0.000	0.009	303.101	0.735	0.4772723E-02	1.208054	0.5740537E-04	1.323134
07202011	16	0.066	0.000	0.003	0.000	0.000	0.000	0.000	0.000	0.014	0.000	0.008	302.276	0.760	0.5518138E-02	1.157743	0.4831918E-04	1.379492
07202011	17	0.074	0.000	0.003	0.000	0.000	0.000	0.000	0.000	0.013	0.000	0.007	300.898	0.783	0.8410811E-02	1.098901	0.3256676E-04	1.528184
07202011	18	0.087	0.000	0.003	0.000	0.000	0.000	0.000	0.000	0.014	0.000	0.007	299.794	0.826	0.1773709E-01	1.394422	0.2274017E-04	1.787601
07202011	19	0.053	0.001	0.000	0.000	0.000	0.000	0.000	0.000	0.001	0.000	0.000	298.492	0.868	NaN	0.1000000E-10	0.1000000E-13	0.000000
07202011	20	0.064	0.001	0.001	0.000	0.000	0.000	0.000	0.000	0.001	0.000	0.001	297.394	0.905	0.7225275E-02	0.3636364	0.2934086E-05	2.093194
07202011	21	0.077	0.001	0.001	0.000	0.000	0.000	0.000	0.000	0.001	0.000	0.001	296.868	0.928	0.1402605E-01	0.4694562	0.2180603E-05	2.333019
07202011	22	0.100	0.001	0.002	0.000	0.000	0.000	0.001	0.000	0.001	0.000	0.001	296.605	0.943	NaN	1.434312	0.2003284E-05	2.854901
07202011	23	0.108	0.002	0.003	0.000	0.000	0.000	0.001	0.000	0.002	0.000	0.001	296.486	0.951	NaN	2.310602	0.2916067E-05	2.898928
07202011	24	0.107	0.002	0.003	0.000	0.000	0.000	0.001	0.000	0.002	0.000	0.002	296.395	0.958	NaN	3.794251	0.4424142E-05	2.933297
07212011	01	0.099	0.002	0.003	0.000	0.000	0.000	0.001	0.000	0.003	0.000	0.002	296.288	0.964	NaN	3.793622	0.4701591E-05	2.906809
07212011	02	0.091	0.002	0.004	0.000	0.000	0.000	0.001	0.000	0.003	0.000	0.002	296.221	0.965	NaN	6.162066	0.7120318E-05	2.937227
07212011	03	0.086	0.001	0.004	0.000	0.000	0.000	0.001	0.000	0.004	0.000	0.003	296.220	0.961	NaN	5.334427	0.8265942E-05	2.809795
07212011	04	0.090	0.002	0.004	0.000	0.000	0.000	0.001	0.000	0.004	0.001	0.003	296.231	0.961	NaN	6.042603	0.9151259E-05	2.819743
07212011	05	0.106	0.002	0.004	0.000	0.000	0.000	0.001	0.000	0.005	0.001	0.003	296.293	0.954	NaN	4.731828	0.7026835E-05	2.828269
07212011	06	0.132	0.003	0.004	0.000	0.001	0.000	0.002	0.000	0.006	0.001	0.004	296.411	0.949	NaN	5.389845	0.5396548E-05	2.999460
07212011	07	0.172	0.003	0.006	0.000	0.001	0.000	0.002	0.000	0.007	0.002	0.004	297.586	0.935	NaN	5.752488	0.5876657E-05	2.990726
07212011	08	0.142	0.002	0.007	0.001	0.001	0.000	0.002	0.001	0.009	0.001	0.006	299.138	0.889	0.5547631E-01	1.580323	0.4777506E-05	2.519545
07212011	09	0.071	0.001	0.007	0.000	0.000	0.000	0.001	0.001	0.015	0.000	0.008	299.886	0.869	NaN	2.991721	0.2360059E-04	2.102998
07212011	10	0.055	0.005	0.010	0.000	0.000	0.000	0.000	0.001	0.019	0.000	0.010	300.637	0.837	NaN	3.215956	0.4962968E-04	1.811569
07212011	11	0.086	0.004	0.009	0.000	0.000	0.000	0.000	0.001	0.019	0.000	0.010	301.301	0.810	NaN	2.568240	0.2982157E-04	1.935105
07212011	12	0.079	0.003	0.007	0.000	0.000	0.000	0.000	0.001	0.014	0.000	0.008	302.872	0.781	NaN	1.703769	0.2740801E-04	1.793533
07212011	13	0.032	0.004	0.009	0.000	0.000	0.000	0.000	0.000	0.014	0.000	0.008	303.474	0.761	0.1976073E-02	1.157743	0.1123593E-03	1.013003
07212011	14	0.035	0.001	0.005	0.000	0.000	0.000	0.000	0.000	0.013	0.000	0.007	303.451	0.756	0.1969039E-02	1.013025	0.8659580E-04	1.068123
07212011	15	0.035	0.000	0.004	0.000	0.000	0.000	0.000	0.000	0.012	0.000	0.006	303.019	0.757	0.1912892E-02	0.8683068	0.7014153E-04	1.092698
07212011	16	0.034	0.000	0.003	0.000	0.000	0.000	0.000	0.000	0.011	0.000	0.005	302.646	0.758	0.1732469E-02	0.7235890	0.5708581E-04	1.102964
07212011	17	0.032	0.000	0.003	0.000	0.000	0.000	0.000	0.000	0.009	0.000	0.005	302.061	0.764	0.1749098E-02	0.7235890	0.6208697E-04	1.066491
07212011	18	0.031	0.001	0.003	0.000	0.000	0.000	0.000	0.000	0.009	0.000	0.005	301.414	0.767	0.2073407E-02	0.7530121	0.6033679E-04	1.096220
07212011	19	0.033	0.001	0.003	0.000	0.000	0.000	0.000	0.000	0.009	0.000	0.005	300.305	0.777	0.3012717E-02	0.7849293	0.5134676E-04	1.184317
07212011	20	0.072	0.002	0.003	0.000	0.000	0.000	0.001	0.000	0.009	0.000	0.005	299.167	0.812	NaN	1.203643	0.1399719E-04	1.934457
07212011	21	0.113	0.003	0.004	0.000	0.000	0.000	0.001	0.000	0.010	0.000	0.006	298.648	0.835	NaN	1.785658	0.1019384E-04	2.243461
07212011	22	0.132	0.005	0.006	0.000	0.000	0.000	0.001	0.000	0.012	0.000	0.007	298.329	0.850	NaN	2.424243	0.1054485E-04	2.361536
07212011	23	0.161	0.006	0.007	0.000	0.000	0.000	0.001	0.000	0.014	0.000	0.007	298.063	0.868	NaN	3.001313	0.8769300E-05	2.534346
07212011	24	0.199	0.005	0.007	0.000	0.000	0.000	0.001	0.000	0.014	0.001	0.007	297.721	0.896	NaN	4.233697	0.7297906E-05	2.763521
07222011	01	0.163	0.003	0.005	0.002	0.000	0.000	0.001	0.000	0.012	0.001	0.005	297.285	0.928	0.1526462	2.740265	0.4497167E-05	2.784853
07222011	02	0.104	0.001	0.002	0.003	0.000	0.000	0.001	0.000	0.011	0.000	0.004	296.948	0.940	0.1058207	2.358596	0.4961859E-05	2.677009
07222011	03	0.072	0.001	0.002	0.001	0.000	0.000	0.001	0.000	0.006	0.000	0.003	296.664	0.952	0.7931644E-01	2.086132	0.5008751E-05	2.619612
07222011	04	0.057	0.001	0.002	0.001	0.000	0.000	0.000	0.000	0.004	0.000	0.002	296.496	0.952	0.3813702E-01	1.366205	0.5354754E-05	2.406776
07222011	05	0.047	0.001	0.002	0.000	0.000	0.000	0.001	0.000	0.003	0.000	0.002	296.454	0.941	NaN	1.971689	0.7111234E-05	2.442894
07222011	06	0.038	0.001	0.003	0.000	0.000	0.000	0.001	0.000	0.003	0.000	0.002	296.428	0.939	NaN	2.414511	0.1121565E-04	2.333005
07222011	07	0.038	0.002	0.005	0.000	0.000	0.000	0.001	0.000	0.003	0.000	0.002	297.355	0.937	NaN	3.302876	0.1835707E-04	2.255089
07222011	08	0.033	0.004	0.008	0.000	0.000	0.000	0.001	0.000	0.006	0.000	0.004	298.917	0.908	NaN	3.626245	0.4262884E-04	1.929754
07222011	09	0.020	0.024	0.009	0.000	0.000	0.000	0.001	0.000	0.016	0.000	0.009	300.350	0.854	NaN	3.219573	0.2014197E-03	1.203696
07222011	10	0.025	0.045	0.010	0.000	0.000	0.000	0.000	0.000	0.019	0.000	0.010	301.888	0.773	0.2996147E-02	1.506024	0.1549948E-03	0.9875147
07222011	11	0.024	0.051	0.010	0.000	0.000	0.000	0.000	0.000	0.022	0.000	0.012	302.497	0.721	0.2197504E-02	1.498127	0.2284403E-03	0.8167760
07222011	12	0.046	0.023	0.007	0.000	0.000	0.000	0.000	0.000	0.025	0.000	0.013	303.209	0.692	0.3555059E-02	1.467269	0.1321091E-03	1.045577
07222011	13	0.080	0.008	0.005	0.000	0.000	0.000	0.000	0.000	0.023	0.000	0.012	303.895	0.663	0.4276574E-02	1.230769	0.7501430E-04	1.215033
07222011	14	0.113	0.003	0.004	0.000	0.000	0.000	0.000	0.000	0.020	0.000	0.010	304.059	0.656	0.4917860E-02	1.025641	0.4399385E-04	1.367603
07222011	15	0.116	0.001	0.004	0.000	0.000	0.000	0.000	0.000	0.016	0.000	0.008	303.752	0.670	0.4544020E-02	0.8465609	0.3323524E-04	1.406059
07222011	16	0.109	0.001	0.003	0.000	0.000	0.000	0.000	0.000	0.012	0.000	0.006	303.251	0.690	0.3953397E-02	0.6772009	0.2507969E-04	1.431395
07222011	17	0.097	0.001	0.003	0.000	0.000	0.000	0.000	0.000	0.010	0.000	0.005	302.769	0.712	0.3606498E-02	0.6031363	0.2218121E-04	1.434430
07222011	18	0.085	0.001	0.003	0.000	0.000	0.000	0.000	0.000	0.009	0.000	0.005	302.216	0.767	0.4865825E-02	0.7530121	0.2247312E-04	1.525139
07222011	19	0.069	0.001	0.002	0.000	0.000	0.000	0.000	0.000	0.008	0.000	0.004	301.593	0.770	0.3678322E-02	0.6024097	0.2104983E-04	1.456643
07222011	20	0.061	0.001	0.002	0.000	0.000	0.000	0.001	0.000	0.007	0.000	0.004	300.194	0.787	NaN	0.8273182	0.1366950E-04	1.781920
07222011	21	0.053	0.001	0.002	0.000	0.000	0.000	0.001	0.000	0.006	0.000	0.003	299.542	0.781	NaN	0.6324118	0.9940850E-05	1.803576
07222011	22	0.056	0.001	0.002	0.000	0.000	0.000	0.000	0.000	0.005	0.000	0.003	299.019	0.791	0.4421532E-02	0.4918033	0.1596394E-04	1.488651
07222011	23	0.058	0.001	0.002	0.000	0.000	0.000	0.000	0.000	0.005	0.000	0.003	298.328	0.843	0.7885337E-02	0.6329114	0.1293502E-04	1.689576
07222011	24	0.052	0.003	0.002	0.000	0.000	0.000	0.001	0.000	0.004	0.000	0.003	297.828	0.886	NaN	1.312534	0.9749565E-05	2.129125
07232011	01	0.057	0.002	0.002	0.000	0.000	0.000	0.001	0.000	0.005	0.000	0.003	297.314	0.929	NaN	2.132165	0.8678179E-05	2.390392
07232011	02	0.064	0.002	0.001	0.000	0.000	0.000	0.001	0.000	0.005	0.000	0.003	297.040	0.935	NaN	2.069382	0.6602604E-05	2.496125
07232011	03	0.067	0.002	0.001	0.000	0.001	0.000	0.001	0.000	0.006	0.000	0.004	296.819	0.945	NaN	3.177509	0.7655815E-05	2.618095
07232011	04	0.059	0.002	0.001	0.000	0.001	0.000	0.001	0.000	0.007	0.000	0.005	296.631	0.948	NaN	3.831521	0.1133578E-04	2.528920
07232011	05	0.057	0.002	0.001	0.000	0.001	0.000	0.001	0.000	0.007	0.000	0.005	296.502	0.949	NaN	3.830983	0.1162227E-04	2.518019
07232011	06	0.053	0.003	0.002	0.000	0.001	0.000	0.001	0.000	0.006	0.000	0.004	296.432	0.950	NaN	3.723915	0.1085321E-04	2.535442
07232011	07	0.050	0.004	0.002	0.000	0.001	0.000	0.001	0.000	0.005	0.000	0.004	297.185	0.927	NaN	2.595805	0.1204501E-04	2.333465
07232011	08	0.049	0.014	0.005	0.000	0.001	0.000	0.001	0.000	0.005	0.000	0.004	298.350	0.897	NaN	2.514471	0.1750532E-04	2.157277
07232011	09	0.041	0.040	0.012	0.000	0.001	0.000	0.001	0.000	0.008	0.000	0.006	299.743	0.839	NaN	2.853417	0.5060581E-04	1.751165
07232011	10	0.028	0.043	0.014	0.000	0.000	0.000	0.000	0.000	0.019	0.000	0.010	301.161	0.775	0.4198968E-02	1.569859	0.1287118E-03	1.086242
07232011	11	0.025	0.027	0.014	0.000	0.000	0.000	0.000	0.001	0.027	0.000	0.014	302.557	0.715	NaN	2.451719	0.2714536E-03	0.9557751
07232011	12	0.040	0.016	0.012	0.000	0.000	0.000	0.000	0.001	0.029	0.000	0.016	303.394	0.670	NaN	2.152965	0.1586265E-03	1.132661
07232011	13	0.062	0.013	0.011	0.000	0.000	0.000	0.000	0.001	0.029	0.000	0.016	304.426	0.633	NaN	1.840494	0.9238498E-04	1.299333
07232011	14	0.076	0.013	0.010	0.000	0.000	0.000	0.000	0.001	0.027	0.000	0.015	304.937	0.612	NaN	1.598910	0.6829490E-04	1.369436
07232011	15	0.090	0.007	0.008	0.000	0.000	0.000	0.000	0.001	0.023	0.000	0.013	303.798	0.639	NaN	1.491725	0.4559577E-04	1.514764
07232011	16	0.110	0.002	0.005	0.000	0.000	0.000	0.000	0.001	0.015	0.000	0.009	303.099	0.668	NaN	1.087733	0.2329261E-04	1.669304
07232011	17	0.111	0.001	0.003	0.000	0.000	0.000	0.000	0.001	0.011	0.000	0.006	302.326	0.705	NaN	0.7789470	0.1340246E-04	1.764323
07232011	18	0.114	0.001	0.002	0.001	0.000	0.000	0.001	0.001	0.009	0.000	0.006	301.537	0.769	0.1140052E-01	0.7421439	0.8533666E-05	1.939353
07232011	19	0.100	0.002	0.002	0.001	0.000	0.000	0.001	0.001	0.008	0.000	0.005	300.692	0.796	0.1042169E-01	0.6754181	0.7465133E-05	1.956535
07232011	20	0.070	0.001	0.001	0.001	0.000	0.000	0.001	0.002	0.006	0.000	0.005	299.356	0.801	0.1092303E-01	0.5038915	0.4527649E-05	2.046464
07232011	21	0.052	0.002	0.001	0.001	0.000	0.000	0.001	0.002	0.004	0.000	0.005	298.323	0.842	0.1350486E-01	0.6215881	0.5553401E-05	2.048944
07232011	22	0.055	0.003	0.001	0.001	0.000	0.000	0.001	0.003	0.002	0.000	0.005	297.880	0.871	0.1009941E-01	0.4996410	0.3685539E-05	2.132157
07232011	23	0.070	0.002	0.001	0.001	0.000	0.001	0.001	0.003	0.001	0.000	0.004	297.601	0.873	0.6268001E-01	0.2756863	0.5157513E-07	3.727975
07232011	24	0.083	0.001	0.001	0.001	0.001	0.001	0.002	0.004	0.000	0.000	0.004	297.395	0.888	0.000000	0.1485531E-08	0.1367148E-18	7.036066
07242011	01	0.067	0.001	0.001	0.001	0.001	0.001	0.002	0.004	0.000	0.000	0.004	296.820	0.926	0.000000	0.1510802E-08	0.1000019E-13	2.179199
07242011	02	0.069	0.001	0.002	0.001	0.001	0.001	0.002	0.004	0.000	0.000	0.004	296.519	0.943	0.000000	0.1728911E-08	0.1585634E-18	7.037570
07242011	03	0.075	0.002	0.001	0.001	0.001	0.001	0.002	0.003	0.000	0.000	0.004	296.411	0.945	0.1717075	0.8336658	0.2023199E-06	3.614953
07242011	04	0.086	0.002	0.001	0.001	0.001	0.001	0.002	0.003	0.001	0.000	0.005	296.337	0.947	0.3260514	1.567128	0.3729414E-06	3.623464
07242011	05	0.112	0.004	0.002	0.001	0.001	0.001	0.002	0.003	0.002	0.001	0.005	296.338	0.947	0.3118282	1.893467	0.6037110E-06	3.496428
07242011	06	0.120	0.004	0.002	0.001	0.001	0.001	0.002	0.003	0.004	0.001	0.006	296.392	0.950	0.3166956	2.480215	0.1058742E-05	3.369699
07242011	07	0.106	0.005	0.003	0.001	0.001	0.001	0.002	0.003	0.008	0.001	0.008	297.273	0.935	0.1752656	2.981247	0.3594331E-05	2.918780
07242011	08	0.072	0.015	0.006	0.001	0.001	0.000	0.001	0.002	0.015	0.001	0.010	298.634	0.899	0.5351949E-01	2.699289	0.1896169E-04	2.153372
07242011	09	0.023	0.030	0.010	0.000	0.000	0.000	0.001	0.001	0.024	0.000	0.013	299.942	0.842	NaN	3.779637	0.1892634E-03	1.300383
07242011	10	0.014	0.022	0.012	0.000	0.000	0.000	0.000	0.001	0.034	0.000	0.017	300.875	0.781	NaN	3.397665	0.7438250E-03	0.6597098
07242011	11	0.016	0.010	0.010	0.000	0.000	0.000	0.000	0.000	0.035	0.000	0.018	301.552	0.749	0.3375590E-02	2.506964	0.4355540E-03	0.7601061
07242011	12	0.026	0.004	0.008	0.000	0.000	0.000	0.000	0.000	0.034	0.000	0.018	302.165	0.724	0.3903627E-02	2.247191	0.3046929E-03	0.8677775
07242011	13	0.029	0.002	0.007	0.000	0.000	0.000	0.000	0.000	0.032	0.000	0.016	302.718	0.706	0.3493905E-02	1.930036	0.2372235E-03	0.9104078
07242011	14	0.028	0.001	0.006	0.000	0.000	0.000	0.000	0.000	0.030	0.000	0.015	302.927	0.700	0.2870798E-02	1.750292	0.2370007E-03	0.8683609
07242011	15	0.026	0.001	0.005	0.000	0.000	0.000	0.000	0.000	0.028	0.000	0.014	302.665	0.707	0.2773821E-02	1.688782	0.2310856E-03	0.8638006
07242011	16	0.026	0.001	0.005	0.000	0.000	0.000	0.000	0.000	0.025	0.000	0.013	302.241	0.723	0.2866030E-02	1.622971	0.2141082E-03	0.8796775
07242011	17	0.029	0.000	0.004	0.000	0.000	0.000	0.000	0.000	0.023	0.000	0.012	301.538	0.760	0.4287779E-02	1.736614	0.1581156E-03	1.040729
07242011	18	0.033	0.001	0.003	0.000	0.000	0.000	0.000	0.000	0.021	0.000	0.011	300.915	0.802	0.6555378E-02	1.886793	0.1127995E-03	1.223417
07242011	19	0.039	0.001	0.003	0.000	0.000	0.000	0.000	0.000	0.021	0.000	0.011	300.144	0.786	0.8659363E-02	1.803279	0.9179546E-04	1.293242
07242011	20	0.061	0.001	0.003	0.000	0.000	0.000	0.001	0.000	0.023	0.000	0.012	299.045	0.786	NaN	2.223645	0.4898324E-04	1.657018
07242011	21	0.090	0.001	0.003	0.001	0.000	0.000	0.001	0.000	0.024	0.000	0.013	298.644	0.796	0.3959548E-01	2.222922	0.3593910E-04	1.791357
07242011	22	0.128	0.002	0.003	0.001	0.001	0.000	0.001	0.000	0.026	0.000	0.014	298.346	0.812	0.6601119E-01	2.538418	0.2574880E-04	1.993806
07242011	23	0.154	0.002	0.004	0.001	0.001	0.000	0.001	0.000	0.027	0.000	0.015	298.064	0.830	0.9460908E-01	3.034425	0.2216597E-04	2.136390
07242011	24	0.170	0.003	0.004	0.000	0.001	0.000	0.001	0.000	0.028	0.000	0.015	297.712	0.858	NaN	4.209662	0.1730022E-04	2.386196
07252011	01	0.180	0.003	0.004	0.000	0.001	0.000	0.001	0.000	0.028	0.001	0.015	297.346	0.890	NaN	5.561381	0.1507892E-04	2.566812
07252011	02	0.213	0.003	0.003	0.000	0.001	0.000	0.001	0.000	0.029	0.001	0.015	297.049	0.912	NaN	6.547884	0.1177829E-04	2.745019
07252011	03	0.257	0.004	0.003	0.001	0.001	0.000	0.001	0.000	0.030	0.002	0.015	296.844	0.925	0.4696696	8.006718	0.9037639E-05	2.947400
07252011	04	0.268	0.005	0.003	0.001	0.001	0.000	0.002	0.000	0.031	0.003	0.015	296.738	0.929	0.5022848	8.264335	0.8208393E-05	3.002950
07252011	05	0.263	0.006	0.004	0.001	0.001	0.000	0.002	0.000	0.031	0.003	0.016	296.674	0.927	0.5185618	8.968451	0.9094088E-05	2.993958
07252011	06	0.250	0.008	0.005	0.001	0.001	0.000	0.002	0.001	0.032	0.004	0.016	296.637	0.931	0.5099826	8.859337	0.8986979E-05	2.993788
07252011	07	0.221	0.010	0.007	0.001	0.001	0.000	0.002	0.001	0.033	0.006	0.016	297.129	0.931	0.4672104	9.397062	0.1081716E-04	2.938879
07252011	08	0.103	0.016	0.015	0.001	0.001	0.000	0.002	0.001	0.031	0.004	0.016	298.476	0.897	0.1426019	5.558893	0.2512782E-04	2.344833
07252011	09	0.025	0.026	0.024	0.000	0.001	0.000	0.001	0.001	0.027	0.001	0.015	299.248	0.878	NaN	8.159015	0.9947383E-03	0.9139289
07252011	10	0.028	0.016	0.018	0.000	0.000	0.000	0.001	0.001	0.028	0.000	0.015	300.065	0.846	NaN	5.612770	0.2870145E-03	1.291273
07252011	11	0.033	0.007	0.014	0.000	0.000	0.000	0.000	0.001	0.029	0.000	0.015	300.866	0.798	NaN	3.744251	0.1724627E-03	1.336670
07252011	12	0.032	0.002	0.010	0.000	0.000	0.000	0.000	0.000	0.026	0.000	0.013	301.799	0.785	0.5968511E-02	2.131148	0.1442831E-03	1.169398
07252011	13	0.042	0.001	0.006	0.000	0.000	0.000	0.000	0.000	0.021	0.000	0.011	301.781	0.773	0.5746543E-02	1.656626	0.9884364E-04	1.224276
07252011	14	0.057	0.000	0.005	0.000	0.000	0.000	0.000	0.000	0.016	0.000	0.008	302.193	0.779	0.5621970E-02	1.255887	0.5210510E-04	1.382070
07252011	15	0.054	0.000	0.004	0.000	0.000	0.000	0.000	0.000	0.012	0.000	0.006	301.780	0.787	0.4661679E-02	0.9836066	0.3941929E-04	1.397113
07252011	16	0.054	0.000	0.003	0.000	0.000	0.000	0.000	0.000	0.009	0.000	0.005	301.305	0.799	0.4520655E-02	0.8576329	0.3178580E-04	1.431068
07252011	17	0.055	0.000	0.003	0.000	0.000	0.000	0.000	0.000	0.008	0.000	0.004	300.629	0.804	0.4366517E-02	0.6861064	0.2337964E-04	1.467554
07252011	18	0.060	0.000	0.003	0.000	0.000	0.000	0.000	0.000	0.008	0.000	0.004	300.275	0.805	0.5506635E-02	0.7194245	0.2045337E-04	1.546220
07252011	19	0.061	0.000	0.003	0.000	0.000	0.000	0.000	0.000	0.008	0.000	0.004	299.817	0.810	0.6199896E-02	0.7194245	0.1947147E-04	1.567587
07252011	20	0.061	0.001	0.003	0.000	0.000	0.000	0.000	0.000	0.008	0.000	0.004	298.852	0.822	0.9706557E-02	0.7561437	0.1687003E-04	1.651488
07252011	21	0.094	0.002	0.004	0.000	0.000	0.000	0.001	0.000	0.009	0.000	0.005	298.219	0.845	NaN	1.685430	0.9997605E-05	2.226815
07252011	22	0.141	0.003	0.005	0.000	0.000	0.000	0.001	0.000	0.009	0.000	0.005	297.767	0.865	NaN	2.140152	0.6628511E-05	2.509029
07252011	23	0.178	0.004	0.005	0.000	0.000	0.000	0.001	0.000	0.009	0.000	0.005	297.414	0.881	NaN	2.333385	0.5107295E-05	2.659795
07252011	24	0.197	0.004	0.005	0.000	0.000	0.000	0.001	0.000	0.009	0.001	0.005	297.067	0.901	NaN	3.091121	0.4841582E-05	2.805129
07262011	01	0.193	0.003	0.004	0.000	0.000	0.000	0.001	0.000	0.009	0.001	0.005	296.744	0.920	NaN	3.628228	0.4784178E-05	2.879887
07262011	02	0.178	0.003	0.004	0.000	0.000	0.000	0.002	0.000	0.008	0.001	0.005	296.501	0.933	NaN	4.192572	0.4697718E-05	2.950593
07262011	03	0.167	0.003	0.003	0.000	0.001	0.000	0.002	0.001	0.008	0.001	0.005	296.330	0.940	NaN	3.961914	0.3468944E-05	3.057708
07262011	04	0.151	0.004	0.003	0.000	0.001	0.000	0.002	0.001	0.007	0.001	0.005	296.186	0.948	NaN	4.839816	0.4024765E-05	3.080088
07262011	05	0.133	0.004	0.003	0.001	0.001	0.000	0.002	0.001	0.007	0.001	0.005	296.052	0.956	0.3597889	4.568717	0.3370586E-05	3.132089
07262011	06	0.116	0.005	0.004	0.001	0.001	0.000	0.002	0.001	0.006	0.001	0.005	295.994	0.962	0.3365108	4.724254	0.4031314E-05	3.068887
07262011	07	0.092	0.006	0.005	0.001	0.001	0.000	0.002	0.002	0.005	0.002	0.005	296.693	0.962	0.2433375	3.843453	0.3751855E-05	3.010476
07262011	08	0.072	0.011	0.009	0.001	0.002	0.000	0.002	0.002	0.004	0.002	0.005	297.995	0.922	0.6365705E-01	1.445372	0.2734090E-05	2.723167
07262011	09	0.055	0.021	0.015	0.000	0.002	0.000	0.001	0.002	0.006	0.001	0.006	299.630	0.863	NaN	3.504034	0.3259302E-04	2.031444
07262011	10	0.049	0.019	0.017	0.000	0.001	0.000	0.001	0.001	0.011	0.001	0.008	301.444	0.785	NaN	2.814652	0.5596357E-04	1.701519
07262011	11	0.042	0.018	0.018	0.000	0.001	0.000	0.001	0.001	0.017	0.000	0.010	302.804	0.709	NaN	2.144499	0.7477579E-04	1.457565
07262011	12	0.049	0.010	0.015	0.000	0.000	0.000	0.000	0.001	0.022	0.000	0.012	303.376	0.676	NaN	1.959135	0.7844240E-04	1.397514
07262011	13	0.079	0.003	0.010	0.000	0.000	0.000	0.000	0.001	0.022	0.000	0.012	304.239	0.640	NaN	1.480040	0.4489231E-04	1.518102
07262011	14	0.109	0.001	0.007	0.000	0.000	0.000	0.000	0.000	0.021	0.000	0.011	304.775	0.613	0.3484011E-02	0.9708738	0.5594447E-04	1.239406
07262011	15	0.127	0.001	0.006	0.000	0.000	0.000	0.000	0.000	0.021	0.000	0.011	304.389	0.628	0.4870176E-02	1.029963	0.4579676E-04	1.351987
07262011	16	0.117	0.002	0.007	0.000	0.000	0.000	0.000	0.000	0.021	0.000	0.011	303.977	0.637	0.5154252E-02	1.060752	0.4803075E-04	1.344095
07262011	17	0.110	0.002	0.007	0.000	0.000	0.000	0.000	0.000	0.022	0.000	0.011	303.444	0.636	0.5525529E-02	1.060752	0.4909626E-04	1.334566
07262011	18	0.116	0.001	0.006	0.001	0.000	0.000	0.000	0.000	0.022	0.000	0.011	302.742	0.647	0.7165730E-02	1.093439	0.4403293E-04	1.395017
07262011	19	0.111	0.001	0.005	0.001	0.000	0.000	0.001	0.000	0.023	0.000	0.012	301.691	0.702	0.1500350E-01	1.386021	0.3160939E-04	1.641954
07262011	20	0.068	0.002	0.008	0.001	0.000	0.000	0.001	0.001	0.027	0.000	0.014	298.852	0.822	0.3599381E-01	2.467221	0.4369425E-04	1.751784
07262011	21	0.069	0.003	0.007	0.001	0.000	0.000	0.001	0.001	0.029	0.001	0.015	298.219	0.845	0.4886079E-01	3.161169	0.4362229E-04	1.860139
07262011	22	0.079	0.004	0.007	0.001	0.000	0.000	0.001	0.001	0.030	0.001	0.016	297.767	0.865	0.7540864E-01	3.914367	0.3810829E-04	2.011642
07262011	23	0.084	0.005	0.007	0.001	0.001	0.000	0.002	0.001	0.031	0.001	0.017	297.414	0.881	0.1052648	4.545496	0.3280453E-04	2.141648
07262011	24	0.083	0.005	0.006	0.001	0.001	0.000	0.002	0.001	0.032	0.001	0.018	297.067	0.901	0.1439615	5.792603	0.3305335E-04	2.243658
07272011	01	0.078	0.005	0.005	0.001	0.001	0.000	0.002	0.002	0.032	0.001	0.018	296.744	0.920	0.1867164	6.869202	0.2988460E-04	2.361459
07272011	02	0.073	0.005	0.004	0.001	0.001	0.000	0.002	0.002	0.032	0.001	0.019	296.501	0.933	0.2206580	8.340397	0.3339275E-04	2.397535
07272011	03	0.071	0.005	0.003	0.001	0.001	0.000	0.003	0.003	0.033	0.001	0.020	296.330	0.940	0.2750695	9.787745	0.3069054E-04	2.503678
07272011	04	0.071	0.006	0.003	0.001	0.001	0.001	0.003	0.003	0.033	0.002	0.021	296.186	0.948	0.3687383	12.83415	0.3053610E-04	2.623554
07272011	05	0.070	0.007	0.003	0.001	0.001	0.001	0.003	0.004	0.034	0.002	0.021	296.052	0.956	0.4649930	15.82989	0.2860954E-04	2.742967
07272011	06	0.070	0.008	0.003	0.001	0.001	0.001	0.003	0.004	0.035	0.002	0.022	295.994	0.962	0.4756266	16.70800	0.3088928E-04	2.733117
07272011	07	0.062	0.008	0.004	0.001	0.002	0.001	0.003	0.004	0.036	0.003	0.023	296.693	0.962	0.4297457	17.93332	0.3913982E-04	2.661042
07272011	08	0.057	0.016	0.008	0.001	0.002	0.001	0.003	0.004	0.041	0.004	0.025	297.995	0.922	0.1583635	9.080523	0.5095144E-04	2.250954
07272011	09	0.059	0.028	0.015	0.001	0.002	0.000	0.002	0.003	0.043	0.003	0.025	299.630	0.863	0.5493206E-01	5.370161	0.8100498E-04	1.821476
07272011	10	0.070	0.029	0.016	0.001	0.001	0.000	0.002	0.003	0.041	0.002	0.024	301.444	0.785	0.2397180E-01	3.453775	0.8842135E-04	1.591737
07272011	11	0.074	0.026	0.017	0.000	0.001	0.000	0.001	0.002	0.041	0.001	0.024	302.804	0.709	NaN	3.707870	0.1057158E-03	1.544985
07272011	12	0.104	0.013	0.015	0.000	0.001	0.000	0.001	0.002	0.040	0.001	0.022	303.376	0.676	NaN	2.998698	0.6001102E-04	1.698702
07272011	13	0.183	0.004	0.011	0.000	0.000	0.000	0.001	0.001	0.036	0.001	0.020	304.239	0.640	NaN	2.319151	0.3382926E-04	1.836036
07272011	14	0.267	0.001	0.008	0.000	0.000	0.000	0.001	0.001	0.033	0.000	0.018	304.775	0.613	NaN	1.773919	0.2228973E-04	1.900829
07272011	15	0.317	0.001	0.007	0.000	0.000	0.000	0.001	0.001	0.030	0.000	0.016	304.389	0.628	NaN	1.667364	0.1591358E-04	2.020262
07272011	16	0.292	0.001	0.007	0.000	0.000	0.000	0.001	0.001	0.029	0.000	0.015	303.977	0.637	NaN	1.626956	0.1531656E-04	2.026214
07272011	17	0.275	0.001	0.007	0.000	0.000	0.000	0.001	0.001	0.028	0.000	0.015	303.444	0.636	NaN	1.626948	0.1584667E-04	2.011436
07272011	18	0.294	0.001	0.006	0.001	0.000	0.000	0.001	0.001	0.027	0.000	0.015	302.742	0.647	0.2278388E-01	1.378080	0.2003659E-04	1.837451
07272011	19	0.275	0.001	0.005	0.001	0.000	0.000	0.001	0.001	0.026	0.000	0.015	301.691	0.702	0.3409421E-01	1.626849	0.1883541E-04	1.936372
07272011	20	0.229	0.002	0.005	0.001	0.000	0.000	0.001	0.001	0.028	0.000	0.016	301.073	0.662	0.2903807E-01	1.525883	0.2482568E-04	1.788620
07272011	21	0.266	0.004	0.006	0.001	0.001	0.000	0.002	0.002	0.030	0.000	0.018	299.919	0.716	0.6376034E-01	2.011515	0.1737538E-04	2.063589
07272011	22	0.274	0.004	0.006	0.001	0.001	0.001	0.002	0.003	0.028	0.001	0.018	298.732	0.783	0.1314858	2.482850	0.1030349E-04	2.381966
07272011	23	0.199	0.003	0.004	0.001	0.001	0.001	0.002	0.004	0.023	0.001	0.017	297.878	0.850	0.1421924	3.035992	0.1026268E-04	2.471040
07272011	24	0.122	0.003	0.002	0.002	0.001	0.001	0.002	0.004	0.017	0.000	0.014	297.288	0.897	0.1362376	3.354760	0.9864207E-05	2.531599
07282011	01	0.083	0.004	0.002	0.001	0.001	0.001	0.002	0.003	0.013	0.000	0.012	296.819	0.932	0.1532220	4.256565	0.1172330E-04	2.560009
07282011	02	0.073	0.005	0.002	0.001	0.001	0.001	0.002	0.003	0.012	0.000	0.010	296.547	0.949	0.2030095	4.741510	0.8569392E-05	2.742967
07282011	03	0.077	0.006	0.002	0.001	0.001	0.000	0.002	0.002	0.013	0.000	0.010	296.450	0.951	0.2057239	5.561807	0.1249439E-04	2.648501
07282011	04	0.091	0.005	0.002	0.001	0.001	0.000	0.002	0.002	0.015	0.001	0.010	296.440	0.951	0.2454959	5.764453	0.1056282E-04	2.736978
07282011	05	0.097	0.003	0.002	0.001	0.001	0.000	0.002	0.002	0.015	0.001	0.011	296.468	0.951	0.2707826	6.476676	0.1174276E-04	2.741582
07282011	06	0.095	0.003	0.002	0.001	0.002	0.001	0.002	0.003	0.013	0.001	0.012	296.575	0.949	0.2945015	6.366032	0.9579265E-05	2.822537
07282011	07	0.094	0.003	0.004	0.001	0.002	0.001	0.003	0.005	0.009	0.001	0.012	297.742	0.909	0.1116666	2.669587	0.5774093E-05	2.664960
07282011	08	0.071	0.004	0.008	0.001	0.001	0.001	0.003	0.005	0.010	0.001	0.012	299.014	0.879	0.4068398E-01	1.982205	0.9341184E-05	2.326747
07282011	09	0.037	0.009	0.008	0.000	0.000	0.000	0.001	0.002	0.017	0.000	0.011	300.134	0.835	NaN	2.927877	0.6944466E-04	1.624914
07282011	10	0.051	0.012	0.008	0.000	0.000	0.000	0.001	0.001	0.021	0.000	0.012	300.905	0.793	NaN	2.520938	0.6071002E-04	1.618302
07282011	11	0.063	0.012	0.008	0.000	0.000	0.000	0.000	0.001	0.024	0.000	0.013	301.591	0.766	NaN	2.451599	0.5951182E-04	1.614846
07282011	12	0.064	0.010	0.007	0.000	0.000	0.000	0.000	0.001	0.026	0.000	0.014	302.249	0.739	NaN	2.217699	0.6792270E-04	1.513888
07282011	13	0.067	0.008	0.006	0.000	0.000	0.000	0.000	0.001	0.026	0.000	0.014	302.719	0.716	NaN	1.986006	0.6799229E-04	1.465521
07282011	14	0.072	0.005	0.006	0.000	0.000	0.000	0.000	0.001	0.023	0.000	0.012	302.769	0.714	NaN	1.674662	0.5067393E-04	1.519143
07282011	15	0.079	0.004	0.005	0.000	0.000	0.000	0.000	0.001	0.019	0.000	0.010	302.565	0.720	NaN	1.429523	0.3633166E-04	1.594906
07282011	16	0.088	0.002	0.004	0.000	0.000	0.000	0.000	0.001	0.015	0.000	0.008	302.325	0.724	NaN	1.119482	0.2436701E-04	1.662215
07282011	17	0.084	0.001	0.004	0.000	0.000	0.000	0.000	0.001	0.011	0.000	0.006	301.446	0.751	NaN	0.9863592	0.1603479E-04	1.788972
07282011	18	0.074	0.001	0.003	0.000	0.000	0.000	0.000	0.001	0.009	0.000	0.005	300.710	0.803	NaN	0.9804645	0.1404095E-04	1.844035
07282011	19	0.070	0.001	0.002	0.001	0.000	0.000	0.001	0.001	0.006	0.000	0.004	300.094	0.820	0.8535564E-02	0.5562019	0.5767578E-05	1.984239
07282011	20	0.049	0.001	0.002	0.001	0.000	0.000	0.001	0.001	0.003	0.000	0.004	298.883	0.844	0.1030105E-01	0.6215882	0.7319164E-05	1.929041
07282011	21	0.041	0.001	0.001	0.001	0.000	0.000	0.001	0.001	0.001	0.000	0.003	298.243	0.860	0.9496033E-02	0.4657539	0.3490648E-05	2.125250
07282011	22	0.046	0.001	0.002	0.001	0.000	0.000	0.001	0.002	0.000	0.000	0.002	297.696	0.893	0.000000	0.7780605E-09	0.7263322E-19	7.029878
07282011	23	0.045	0.001	0.002	0.001	0.000	0.000	0.001	0.001	0.000	0.000	0.002	297.439	0.898	0.6830513E-02	0.3193061	0.1397671E-05	2.358802
07282011	24	0.045	0.001	0.002	0.001	0.000	0.000	0.001	0.002	0.000	0.000	0.002	296.999	0.922	0.000000	0.9203571E-09	0.8501338E-19	7.034469
07292011	01	0.050	0.001	0.002	0.001	0.001	0.000	0.001	0.002	0.000	0.000	0.002	296.683	0.940	0.000000	0.1229346E-08	0.1132785E-18	7.035527
07292011	02	0.053	0.001	0.002	0.001	0.001	0.000	0.001	0.002	0.000	0.000	0.002	296.462	0.937	0.000000	0.1337261E-08	0.1000006E-13	2.126214
07292011	03	0.054	0.001	0.002	0.001	0.001	0.000	0.001	0.001	0.000	0.000	0.002	296.225	0.941	0.1090856	0.6736701	0.3190251E-06	3.324622
07292011	04	0.062	0.002	0.002	0.001	0.001	0.000	0.001	0.001	0.000	0.000	0.002	296.078	0.945	0.1439830	0.8739747	0.3800517E-06	3.361656
07292011	05	0.069	0.002	0.003	0.001	0.001	0.000	0.001	0.002	0.001	0.001	0.003	295.986	0.946	0.1354334	1.009788	0.5594178E-06	3.256494
07292011	06	0.077	0.003	0.003	0.001	0.001	0.000	0.002	0.002	0.001	0.001	0.003	295.925	0.946	0.1437684	1.038879	0.4519981E-06	3.361428
07292011	07	0.069	0.006	0.005	0.001	0.001	0.001	0.002	0.002	0.001	0.001	0.004	296.450	0.934	0.1438334	1.252902	0.7208041E-06	3.240100
07292011	08	0.051	0.025	0.011	0.000	0.001	0.000	0.002	0.002	0.006	0.001	0.006	297.827	0.890	NaN	3.769008	0.2518135E-04	2.175148
07292011	09	0.013	0.034	0.016	0.000	0.001	0.000	0.001	0.001	0.023	0.000	0.013	299.465	0.826	NaN	3.903695	0.1632728E-02	0.3785621
07292011	10	0.003	0.016	0.017	0.000	0.000	0.000	0.000	0.001	0.038	0.000	0.020	300.953	0.765	NaN	3.061833	0.1011608E-01	-0.5190306
07292011	11	0.032	0.009	0.016	0.000	0.000	0.000	0.000	0.001	0.041	0.000	0.021	301.523	0.719	NaN	3.448255	0.2970807E-03	1.064725
07292011	12	0.082	0.004	0.013	0.000	0.000	0.000	0.000	0.001	0.039	0.000	0.020	302.783	0.693	NaN	2.831802	0.7871968E-04	1.555980
07292011	13	0.106	0.002	0.011	0.000	0.000	0.000	0.000	0.001	0.032	0.000	0.017	303.467	0.670	NaN	2.223624	0.5064081E-04	1.642561
07292011	14	0.141	0.001	0.009	0.000	0.000	0.000	0.000	0.001	0.025	0.000	0.013	303.693	0.657	NaN	1.646627	0.2660675E-04	1.791603
07292011	15	0.143	0.000	0.007	0.000	0.000	0.000	0.000	0.000	0.022	0.000	0.012	303.554	0.655	0.8253634E-02	1.230769	0.4091939E-04	1.478248
07292011	16	0.138	0.000	0.007	0.000	0.000	0.000	0.000	0.000	0.019	0.000	0.010	303.288	0.662	0.7111847E-02	1.025641	0.3454526E-04	1.472607
07292011	17	0.125	0.000	0.007	0.000	0.000	0.000	0.000	0.000	0.018	0.000	0.010	302.754	0.668	0.7555723E-02	1.058201	0.3678794E-04	1.458863
07292011	18	0.135	0.000	0.006	0.000	0.000	0.000	0.001	0.001	0.017	0.000	0.009	301.930	0.696	NaN	1.255587	0.1442071E-04	1.939860
07292011	19	0.158	0.001	0.005	0.000	0.000	0.000	0.001	0.001	0.016	0.000	0.010	301.154	0.728	NaN	1.478250	0.1450755E-04	2.008154
07292011	20	0.180	0.001	0.004	0.001	0.000	0.000	0.001	0.002	0.015	0.000	0.010	299.884	0.744	0.2404338E-01	1.066753	0.1287317E-04	1.918378
07292011	21	0.237	0.002	0.003	0.001	0.001	0.001	0.002	0.003	0.013	0.000	0.011	299.274	0.758	0.5078530E-01	1.219022	0.5030795E-05	2.384375
07292011	22	0.290	0.002	0.003	0.001	0.001	0.001	0.002	0.004	0.011	0.000	0.011	298.914	0.770	0.7680988E-01	1.123141	0.2924164E-05	2.584432
07292011	23	0.301	0.003	0.003	0.001	0.001	0.001	0.003	0.005	0.009	0.000	0.012	298.556	0.795	0.9890753E-01	1.265023	0.2219226E-05	2.755897
07292011	24	0.283	0.003	0.003	0.002	0.001	0.001	0.003	0.006	0.007	0.001	0.012	298.216	0.821	0.1014852	1.218461	0.1630592E-05	2.873466
07302011	01	0.266	0.003	0.003	0.002	0.001	0.001	0.004	0.006	0.005	0.001	0.012	297.762	0.861	0.1542912	1.556794	0.1306784E-05	3.076027
07302011	02	0.268	0.003	0.002	0.002	0.002	0.001	0.005	0.007	0.003	0.001	0.012	297.360	0.905	0.4034188	2.295118	0.5221507E-06	3.643009
07302011	03	0.274	0.003	0.001	0.002	0.002	0.001	0.005	0.008	0.002	0.002	0.012	297.255	0.911	0.4273784	1.977936	0.3303454E-06	3.777244
07302011	04	0.296	0.003	0.002	0.002	0.002	0.002	0.005	0.008	0.002	0.002	0.012	297.207	0.911	0.4292771	2.098366	0.3758603E-06	3.746855
07302011	05	0.306	0.004	0.002	0.002	0.002	0.002	0.005	0.008	0.002	0.002	0.011	297.187	0.910	0.3575795	1.622994	0.2771980E-06	3.767527
07302011	06	0.322	0.005	0.002	0.002	0.002	0.002	0.005	0.008	0.003	0.002	0.011	297.197	0.910	0.3677177	1.640046	0.2705747E-06	3.782569
07302011	07	0.328	0.005	0.002	0.002	0.002	0.002	0.006	0.008	0.003	0.002	0.011	298.149	0.895	0.2950454	1.347810	0.1848212E-06	3.862877
07302011	08	0.271	0.008	0.005	0.002	0.002	0.001	0.005	0.006	0.003	0.002	0.010	299.878	0.848	0.1779862	1.103550	0.2651826E-06	3.619247
07302011	09	0.147	0.025	0.011	0.001	0.002	0.001	0.003	0.003	0.008	0.001	0.009	300.850	0.816	0.3674525E-01	1.221700	0.3270906E-05	2.572297
07302011	10	0.062	0.031	0.013	0.000	0.001	0.000	0.001	0.001	0.010	0.000	0.007	301.837	0.774	NaN	1.972390	0.2691819E-04	1.864947
07302011	11	0.035	0.026	0.012	0.000	0.001	0.000	0.001	0.001	0.010	0.000	0.006	302.779	0.728	NaN	1.433153	0.4107281E-04	1.542738
07302011	12	0.029	0.018	0.010	0.000	0.000	0.000	0.001	0.001	0.010	0.000	0.006	303.138	0.694	NaN	1.079088	0.4762280E-04	1.355242
07302011	13	0.036	0.012	0.008	0.000	0.001	0.000	0.001	0.001	0.012	0.000	0.007	302.498	0.699	NaN	1.148440	0.4040062E-04	1.453720
07302011	14	0.042	0.011	0.007	0.001	0.001	0.000	0.001	0.001	0.013	0.000	0.008	303.842	0.685	0.6338477E-02	0.7929477	0.1653605E-04	1.680813
07302011	15	0.033	0.015	0.008	0.000	0.001	0.000	0.001	0.001	0.014	0.000	0.009	303.390	0.695	NaN	1.375826	0.7645749E-04	1.255143
07302011	16	0.040	0.015	0.007	0.000	0.001	0.000	0.001	0.001	0.014	0.000	0.009	302.027	0.722	NaN	1.430535	0.5534051E-04	1.412455
07302011	17	0.050	0.016	0.006	0.000	0.001	0.000	0.001	0.002	0.012	0.000	0.009	301.838	0.742	NaN	1.353863	0.3567178E-04	1.579250
07302011	18	0.048	0.016	0.005	0.000	0.001	0.000	0.001	0.003	0.011	0.000	0.009	301.184	0.776	NaN	1.376971	0.2920229E-04	1.673508
07302011	19	0.044	0.013	0.005	0.000	0.001	0.001	0.001	0.003	0.010	0.000	0.009	300.236	0.812	NaN	1.650567	0.2234325E-04	1.868487
07302011	20	0.064	0.011	0.004	0.000	0.001	0.001	0.002	0.004	0.006	0.000	0.009	298.998	0.848	NaN	1.715464	0.8324390E-05	2.314029
07302011	21	0.112	0.010	0.003	0.000	0.001	0.001	0.003	0.008	0.001	0.000	0.010	298.279	0.873	NaN	1.012264	0.1199740E-05	2.926207
07302011	22	0.159	0.011	0.002	0.000	0.001	0.002	0.004	0.011	0.000	0.001	0.010	297.795	0.885	NaN	0.6501967	0.2593292E-05	2.399193
07302011	23	0.191	0.010	0.000	0.002	0.002	0.002	0.005	0.013	0.000	0.003	0.009	297.461	0.894	NaN	1.268750	0.1174527E-09	7.033513
07302011	24	0.202	0.010	0.000	0.004	0.002	0.002	0.006	0.014	0.000	0.005	0.009	297.280	0.890	NaN	2.265068	0.2077785E-09	7.037480
