# Supplementary material for: Understanding nitrate formation in a world with less sulfate
Source: Copernicus journal article supplement (doi:10.5194/acp-18-12765-2018), 2018-09-05
Supplement: Supplementary file 2 [file acp-18-12765-2018-supplement.zip › DATA/RAW DATA FOR DIURNALS/SCAPe.csv]

Midtime	Num	T_water_JST052012_medianavg	T_water_JST052012_stder	T_pH_JST052012_medianavg	T_pH_JST052012_stder	T_water_YRK062012_medianavg	T_water_YRK062012_stder	T_pH_YRK062012_medianavg	T_pH_YRK062012_stder	T_water_GT072012_medianavg	T_water_GT072012_stder	T_pH_GT072012_medianavg	T_pH_GT072012_stder	T_water_RS092012_medianavg	T_water_RS092012_stder	T_pH_RS092012_medianavg	T_pH_RS092012_stder	T_water_JST112012_medianavg	T_water_JST112012_stder	T_pH_JST112012_medianavg	T_pH_JST112012_stder	T_water_YRK122012_medianavg	T_water_YRK122012_stder	T_pH_YRK122012_medianavg	T_pH_YRK122012_stder
00:30:00	0.5	4.77	0.8887	1.68	0.0978	7.46	0.7864	1.07	0.1161	9.56	1.4537	1.2	0.0621	7.61	4.1247	1.62	0.1798	6.06	1.6273	2.71	0.124	2.83	1.0591	1.99	0.2076
01:30:00	1.5	6.2	1.1567	1.77	0.1092	8.08	1.1982	1.12	0.1328	9.51	1.4536	1.24	0.0581	6.31	3.5787	1.34	0.1592	5	1.886	2.89	0.1288	2.37	0.6831	2.04	0.1874
02:30:00	2.5	6.69	1.9432	1.84	0.1326	8.695	0.821	1.185	0.1333	10.1	1.4401	1.31	0.045	6.48	3.5855	1.37	0.1717	5.785	2.2308	2.895	0.1398	2.455	0.9166	2.08	0.2039
03:30:00	3.5	7.85	2.1612	1.92	0.1287	10.8	1.1411	1.24	0.1262	12.1	1.6713	1.405	0.0488	6.29	3.6507	1.57	0.1692	7.46	2.7857	2.96	0.1507	2.7	1.2928	2.1	0.2085
04:30:00	4.5	7.87	3.6313	1.83	0.1276	12.45	2.2733	1.365	0.1256	15.3	1.7808	1.43	0.0499	6.64	4.0013	1.58	0.1631	6.56	3.0748	2.98	0.1408	3.11	1.4716	2.34	0.2074
05:30:00	5.5	8.24	3.1782	2	0.1334	12.15	1.2667	1.365	0.132	16.65	1.65	1.49	0.0354	11	4.3647	1.78	0.1368	10.25	3.7198	3.11	0.1487	4.05	1.0574	2.59	0.2159
06:30:00	6.5	10.77	2.1417	2.125	0.1128	12.1	1.5577	1.36	0.099	16.95	2.0706	1.5	0.0495	12.75	3.8934	1.92	0.1461	13.1	3.0693	3.18	0.1534	3.7	0.963	2.45	0.2257
07:30:00	7.5	9.57	1.596	2.045	0.1173	10.1	1.5169	1.38	0.149	13	1.1059	1.375	0.0371	9.355	3.3539	2.12	0.1638	12.2	4.8519	3.19	0.1389	3.92	0.9464	2.62	0.2241
08:30:00	8.5	5.96	1.538	1.905	0.1243	7.48	0.9364	1.17	0.1148	9.57	1.2657	1.3	0.0731	5.81	2.2306	2.08	0.1625	11.3	2.511	3.21	0.1206	4.15	0.9212	2.72	0.2275
09:30:00	9.5	4.215	1.0814	1.555	0.1325	5.32	0.5677	0.995	0.0661	6.82	0.9656	1.04	0.0654	4.9	2.1312	1.82	0.1842	4.705	1.2896	2.97	0.1225	3.455	0.8247	2.91	0.2367
10:30:00	10.5	3.595	0.6628	1.165	0.1156	4.365	0.3803	0.905	0.0526	5.64	0.7355	0.895	0.0469	4.375	1.1583	1.45	0.1673	2.655	0.9911	2.47	0.1602	2.14	0.6514	2.51	0.2171
11:30:00	11.5	3.04	0.8889	0.955	0.1183	3.62	0.305	0.82	0.0644	4.51	0.3956	0.85	0.0362	3.31	1.0335	1.01	0.1532	1.58	0.9944	1.73	0.1719	1.25	0.5565	2.01	0.253
12:30:00	12.5	2.62	0.6306	0.88	0.114	3.005	0.2972	0.735	0.0513	3.885	0.3413	0.81	0.0323	2.96	1.0381	0.78	0.1601	1.685	1.3669	1.635	0.1927	1.345	0.5116	1.71	0.2472
13:30:00	13.5	2.725	0.9857	0.775	0.1317	2.39	0.3563	0.71	0.0619	3.485	0.3397	0.79	0.033	2.855	0.9464	0.68	0.1494	1.3	2.2711	1.21	0.2066	1.275	0.4949	1.865	0.2936
14:30:00	14.5	2.36	0.4626	0.665	0.0593	2.105	0.3485	0.66	0.0572	3.35	0.4753	0.745	0.0332	2.48	0.9989	0.68	0.135	1.29	3.1843	1.09	0.2161	1.23	0.3442	1.295	0.242
15:30:00	15.5	2.14	0.4507	0.56	0.0592	2.21	0.4139	0.68	0.0522	3.14	1.0286	0.775	0.0359	2.42	1.3089	0.74	0.1511	1.069	0.237	1.065	0.188	1.14	0.3322	1.235	0.2626
16:30:00	16.5	2.14	1.0981	0.605	0.1331	1.87	1.4	0.68	0.0724	3.31	0.3911	0.74	0.0356	2.59	1.2096	0.66	0.1082	0.857	0.2641	0.99	0.1758	1.37	0.7195	1.41	0.2159
17:30:00	17.5	2	0.8439	0.62	0.1181	2.52	1.4167	0.77	0.1145	3.22	0.3799	0.74	0.0367	3.17	0.8537	0.8	0.0975	1.135	0.3125	1.26	0.1601	1.44	1.0616	1.5	0.2174
18:30:00	18.5	2.24	0.8628	0.67	0.1185	2.405	1.6732	0.745	0.121	3.68	0.3245	0.785	0.0374	3.47	1.0334	0.9	0.1003	1.52	0.6096	1.68	0.1686	1.62	0.5079	1.33	0.1879
19:30:00	19.5	3.03	1.2049	0.77	0.1261	3.33	1.5846	0.765	0.1223	4.28	0.6547	0.88	0.0424	3.875	1.3565	1.02	0.096	2.1	0.9392	1.93	0.1578	1.56	0.5738	1.04	0.2121
20:30:00	20.5	3.025	1.0492	0.955	0.1074	3.56	1.3187	0.805	0.0815	5.52	0.9768	0.93	0.0476	4.765	1.4305	1.315	0.1007	2.425	1.2241	2.11	0.1542	1.72	0.5773	1.26	0.2243
21:30:00	21.5	3.74	0.786	1.19	0.1043	4.375	1.2674	0.84	0.084	5.94	0.8083	0.99	0.0523	5.27	1.7904	1.44	0.1412	2.81	1.9942	2.31	0.1498	1.97	1.0457	1.67	0.234
22:30:00	22.5	4.17	0.7669	1.325	0.0995	5.1	2.0739	0.93	0.0906	7.72	0.9764	1.07	0.0581	3.56	2.5954	1.37	0.1643	3.495	2.2444	2.32	0.1332	2.27	0.9067	1.78	0.2385
23:30:00	23.5	4.8	0.6691	1.52	0.0877	6.31	1.1548	1	0.0882	8.39	1.4165	1.155	0.0633	5.62	3.7131	1.5	0.1959	4.26	1.8797	2.485	0.1214	2.64	0.7366	1.93	0.2223
