# Supplementary material for: Understanding nitrate formation in a world with less sulfate
Source: Copernicus journal article supplement (doi:10.5194/acp-18-12765-2018), 2018-09-05
Supplement: Supplementary file 2 [file acp-18-12765-2018-supplement.zip › DATA/RAW DATA FOR DIURNALS/SOAS.csv]

Midtime	Num	IonOrgWater_GITRH_medianavg	IonOrgWater_GITRH_stder	pH_total_water_medianavg	pH_total_water_stder
00:30:00	0.5	5.833	0.517	1.197	0.108
01:30:00	1.5	6.334	0.568	1.191	0.116
02:30:00	2.5	6.768	0.622	1.342	0.124
03:30:00	3.5	7.061	0.648	1.347	0.123
04:30:00	4.5	6.872	0.696	1.357	0.119
05:30:00	5.5	7.222	0.702	1.268	0.124
06:30:00	6.5	8.797	0.855	1.390	0.135
07:30:00	7.5	10.721	1.078	1.542	0.125
08:30:00	8.5	7.694	1.082	1.348	0.133
09:30:00	9.5	4.455	0.602	1.205	0.130
10:30:00	10.5	2.998	0.390	1.002	0.119
11:30:00	11.5	2.852	0.335	0.877	0.112
12:30:00	12.5	2.248	0.296	0.758	0.098
13:30:00	13.5	2.030	0.242	0.738	0.088
14:30:00	14.5	1.645	0.243	0.669	0.075
15:30:00	15.5	1.942	0.444	0.729	0.088
16:30:00	16.5	2.334	0.322	0.653	0.101
17:30:00	17.5	2.171	0.252	0.689	0.117
18:30:00	18.5	2.249	0.399	0.636	0.070
19:30:00	19.5	2.217	0.454	0.673	0.089
20:30:00	20.5	2.741	0.586	0.830	0.116
21:30:00	21.5	3.259	0.488	0.950	0.108
22:30:00	22.5	3.958	0.602	1.161	0.105
23:30:00	23.5	4.804	0.529	1.242	0.100
