# Supplementary material for: Understanding nitrate formation in a world with less sulfate
Source: Copernicus journal article supplement (doi:10.5194/acp-18-12765-2018), 2018-09-05
Supplement: Supplementary file 2 [file acp-18-12765-2018-supplement.zip › DATA/Readme.txt.txt]

1) The folder "RAW DATA FOR DIURNALS" includes the ISORROPIA outputs for all sites and months (data_extract_*), as well as the measurements 
from Guo et al. 2015 (SOAS, SCAPe)
2) The files "average_entire2001" and "average_entire2011" are the yearly averaged ISORROPIA inputs for the  entire US
3) The files "average2001PH" and "average2011PH" are netcdf files with the yearly averaged pH calculated from the hourly ISORROPIA outputs for the entire year
4) "Weber_Vasilakos_comparison" is an excel sheet with the raw data for the comparison between the results of this work and the results of Webet et al. 2016
5) "ORGANIC PH" includes all the inputs/outputs used for the E-AIM runs in order to determine the impact of organics on pH
