# Supplementary material for: Understanding nitrate formation in a world with less sulfate
Source: Copernicus journal article supplement (doi:10.5194/acp-18-12765-2018), 2018-09-05
Supplement: Supplementary file 2 [file acp-18-12765-2018-supplement.zip › DATA/Weber_Vasilakos_comparison.xlsx]

## Sheet: Mes
Summer_start	Summer_stop	NO3_avg	NH4_avg	R_SO4_avg	SO4_avg	pH_avg
1998-06-01	1998-08-31	0.351218	2.16479	1.80295	6.67481	0.6015	1998
1999-06-01	1999-08-31	0.258245	2.24575	1.83391	6.85621	0.553	1999
2000-06-01	2000-08-31	0.181353	1.84368	1.59702	6.15249	0.1208	2000
2001-06-01	2001-08-31	0.18055	1.52527	1.41315	6.05749	0.325686	2001
2002-06-01	2002-08-31	0.162355	1.34114	1.923	4.12755	0.384	2002
2003-06-01	2003-08-31	0.136563	1.21782	1.64047	4.04945	0.389286	2003
2004-06-01	2004-08-31	0.143324	1.60138	1.67757	5.62986	0.349167	2004
2005-06-01	2005-08-31	0.104901	1.76264	1.73765	5.84522	0.380909	2005
2006-06-01	2006-08-31	0.156108	1.44107	1.35939	5.3961	-0.150667	2006
2007-06-01	2007-08-31	0.168696	1.26671	1.39831	4.55187	-0.0595652	2007
2008-06-01	2008-08-31	0.121818	1.02682	1.5991	3.28136	0.241818	2008
2009-06-01	2009-08-31	0.145	0.992857	1.61702	3.08929	0.0910714	2009
2010-06-01	2010-08-31	0.208965	0.696207	1.27054	2.57069	-0.0465517	2010
2011-06-01	2011-08-31	0.216896	1.02517	1.4497	3.43483	-0.0841379	2011
2012-06-01	2012-08-31	0.151667	0.661333	1.38193	2.29733	-0.091	2012
2013-06-01	2013-08-31	0.0936765	0.565588	1.53548	1.83838	0.104118	2013
SOAS_time	SOAS_pH	SOAS_SO4	SOAS_SO4_StdError	SOAS_R_SO4	SOAS_R_SO4_StdError
2013-06-20	0.94	1.80032	0.0248212	1.35223	0.0189002

## Sheet: CMAQ_2001
CENTVIL	32.9029	-87.2497
Date	Hour	NH3	SO2	HNO3	CL	NA	MG	K	CA	NH4	NO3	SO4	T	RH
Alabama local	1-24hr	umol/m3	umol/m3	umol/m3	umol/m3	umol/m3	umol/m3	umol/m3	umol/m3	umol/m3	umol/m3	umol/m3	K		pH
2011-02-06	1	0.04	0.05	0.008	0.004	0.003	0.002	0.006	0.013	0.062	0.002	0.05	297.431	0.808	1.63259
2011-02-06	2	0.048	0.052	0.007	0.003	0.003	0.002	0.007	0.014	0.058	0.003	0.049	297.023	0.84	1.8515
2011-02-06	3	0.051	0.055	0.007	0.003	0.004	0.002	0.007	0.015	0.054	0.003	0.048	296.787	0.852	1.93756
2011-02-06	4	0.051	0.056	0.006	0.003	0.004	0.002	0.008	0.015	0.05	0.003	0.047	296.615	0.858	1.99254
2011-02-06	5	0.049	0.054	0.006	0.003	0.004	0.002	0.008	0.015	0.047	0.003	0.046	296.459	0.865	2.01668
2011-02-06	6	0.049	0.05	0.005	0.003	0.004	0.002	0.008	0.015	0.044	0.003	0.045	296.365	0.868	2.0185
2011-02-06	7	0.049	0.046	0.008	0.003	0.005	0.002	0.009	0.015	0.042	0.003	0.044	297.201	0.871	2.04902
2011-02-06	8	0.04	0.041	0.016	0.002	0.005	0.002	0.009	0.015	0.043	0.003	0.043	300.374	0.78	1.63955
2011-02-06	9	0.038	0.094	0.032	0.001	0.004	0.002	0.007	0.01	0.063	0.003	0.047	302.31	0.694	1.34129
2011-02-06	10	0.014	0.105	0.048	0	0.003	0.001	0.004	0.005	0.084	0.002	0.05	304.306	0.603	-0.729799
2011-02-06	11	0.004	0.066	0.041	0	0.002	0.001	0.003	0.003	0.067	0.001	0.045	306.134	0.529	-0.419819
2011-02-06	12	0.003	0.054	0.038	0	0.002	0.001	0.003	0.003	0.062	0.001	0.045	307.836	0.468	-0.499591
2011-02-06	13	0.002	0.056	0.037	0	0.002	0	0.002	0.003	0.061	0.001	0.047	310.087	0.395	-0.415221
2011-02-06	14	0.001	0.032	0.031	0	0.001	0	0.002	0.002	0.054	0.001	0.053	307.468	0.44	0.289741
2011-02-06	15	0	0.009	0.018	0	0.001	0	0.001	0.002	0.048	0.001	0.059	305.3	0.53	-0.300353
2011-02-06	16	0	0.005	0.01	0.001	0.001	0	0.001	0.002	0.056	0	0.069	306.182	0.528	-0.327337
2011-02-06	17	0	0.009	0.013	0.001	0.001	0	0.002	0.002	0.066	0	0.079	306.981	0.471	-0.303442
2011-02-06	18	0	0.016	0.016	0.001	0.001	0	0.002	0.002	0.069	0	0.088	306.139	0.519	-0.397868
2011-02-06	19	0	0.021	0.016	0.001	0.001	0	0.002	0.002	0.075	0	0.097	304.488	0.557	-0.38825
2011-02-06	20	0	0.027	0.016	0.001	0.001	0	0.002	0.002	0.084	0	0.107	302.434	0.567	-0.368129
2011-02-06	21	0	0.032	0.017	0.002	0.002	0	0.003	0.002	0.092	0	0.113	301.15	0.574	-0.275593
2011-02-06	22	0	0.037	0.019	0.001	0.002	0	0.004	0.002	0.098	0	0.115	300.233	0.601	-0.137117
2011-02-06	23	0	0.04	0.021	0.001	0.002	0	0.004	0.002	0.102	0	0.114	299.397	0.645	-0.0286594
2011-02-06	24	0.001	0.042	0.021	0.001	0.002	0.001	0.005	0.002	0.105	0	0.111	298.592	0.705	0.0581935
2011-03-06	1	0.001	0.042	0.02	0.001	0.002	0.001	0.005	0.002	0.107	0	0.107	297.763	0.785	0.051555
2011-03-06	2	0.001	0.036	0.016	0.001	0.002	0.001	0.005	0.002	0.107	0.001	0.101	297.198	0.838	0.10439
2011-03-06	3	0.001	0.028	0.012	0.001	0.002	0.001	0.004	0.003	0.108	0.001	0.095	296.937	0.852	0.130201
2011-03-06	4	0.002	0.023	0.009	0.001	0.003	0.001	0.004	0.003	0.109	0.001	0.087	296.834	0.846	0.151625
2011-03-06	5	0.002	0.017	0.006	0.001	0.003	0.001	0.004	0.003	0.109	0.001	0.08	296.759	0.835	0.141888
2011-03-06	6	0.003	0.012	0.004	0.001	0.003	0.001	0.004	0.003	0.105	0.001	0.072	296.574	0.853	0.22543
2011-03-06	7	0.003	0.011	0.004	0.001	0.003	0.001	0.003	0.003	0.102	0	0.068	297.472	0.852	0.238443
2011-03-06	8	0.003	0.016	0.006	0.001	0.003	0.001	0.003	0.003	0.091	0	0.063	300.215	0.747	-0.0379961
2011-03-06	9	0.001	0.056	0.018	0.001	0.003	0.001	0.002	0.003	0.053	0.001	0.045	302.54	0.659	-0.140351
2011-03-06	10	0.001	0.074	0.029	0	0.002	0	0.002	0.003	0.036	0.001	0.035	304.637	0.58	-0.0256204
2011-03-06	11	0.001	0.086	0.034	0	0.002	0	0.001	0.003	0.033	0.001	0.037	307.051	0.489	0.235451
2011-03-06	12	0	0.111	0.04	0	0.001	0	0.001	0.002	0.034	0.001	0.049	309.253	0.416	-0.630133
2011-03-06	13	0	0.064	0.032	0	0.001	0	0.001	0.002	0.032	0	0.056	306.985	0.483	-0.694342
2011-03-06	14	0	0.028	0.022	0	0.001	0	0.001	0.002	0.035	0	0.062	307.331	0.45	-0.735615
2011-03-06	15	0	0.016	0.019	0	0.001	0	0.001	0.001	0.038	0	0.064	308.784	0.408	-0.765962
2011-03-06	16	0	0.009	0.015	0.001	0.001	0	0.001	0.001	0.04	0	0.059	306.083	0.503	-0.588303
2011-03-06	17	0	0.004	0.011	0.001	0.001	0	0.001	0.001	0.043	0	0.05	305.923	0.456	-0.237792
2011-03-06	18	0.001	0.004	0.009	0.001	0.001	0	0.001	0.001	0.054	0	0.045	306.065	0.448	-0.00545165
2011-03-06	19	0.003	0.004	0.009	0.001	0.001	0	0.001	0.001	0.068	0	0.044	304.308	0.497	-0.557507
2011-03-06	20	0.004	0.005	0.009	0.001	0.001	0	0.001	0.001	0.072	0	0.045	302.108	0.531	-0.479408
2011-03-06	21	0.003	0.009	0.009	0.002	0.001	0	0.001	0.001	0.072	0	0.046	300.93	0.542	-0.53133
2011-03-06	22	0.003	0.016	0.011	0.002	0.001	0	0.001	0.001	0.074	0	0.047	299.92	0.589	-0.430287
2011-03-06	23	0.004	0.02	0.011	0.001	0.001	0	0.001	0.001	0.076	0	0.047	299.08	0.656	-0.237329
2011-03-06	24	0.005	0.02	0.011	0.001	0.001	0	0.002	0.001	0.08	0	0.046	298.31	0.733	0.0214682
2011-04-06	1	0.011	0.018	0.01	0.001	0.001	0	0.002	0.001	0.079	0.001	0.043	297.602	0.813	1.44397
2011-04-06	2	0.017	0.016	0.009	0.001	0.001	0.001	0.002	0.002	0.069	0.001	0.038	297.114	0.858	1.56288
2011-04-06	3	0.019	0.015	0.009	0.001	0.002	0.001	0.002	0.002	0.059	0.001	0.034	296.851	0.867	1.5654
2011-04-06	4	0.022	0.017	0.009	0.001	0.002	0.001	0.003	0.002	0.048	0.001	0.029	296.648	0.871	1.56979
2011-04-06	5	0.025	0.019	0.008	0.001	0.002	0.001	0.004	0.003	0.038	0.001	0.026	296.413	0.879	1.68185
2011-04-06	6	0.026	0.022	0.008	0.001	0.003	0.001	0.005	0.004	0.033	0.001	0.024	296.455	0.858	1.72318
2011-04-06	7	0.026	0.023	0.011	0.001	0.003	0.001	0.006	0.004	0.03	0.001	0.024	297.176	0.862	1.69931
2011-04-06	8	0.027	0.031	0.022	0.001	0.004	0.001	0.007	0.005	0.029	0.002	0.026	299.54	0.797	1.46358
2011-04-06	9	0.044	0.088	0.042	0.001	0.005	0.001	0.008	0.006	0.036	0.003	0.03	302.067	0.692	1.3945
2011-04-06	10	0.027	0.123	0.057	0	0.003	0.001	0.006	0.004	0.047	0.002	0.032	304.612	0.581	-0.849573
2011-04-06	11	0.004	0.119	0.066	0	0.002	0	0.003	0.002	0.045	0.001	0.031	306.57	0.492	-0.55633
2011-04-06	12	0.001	0.076	0.05	0	0.001	0	0.002	0.001	0.031	0	0.03	306.974	0.482	0.0673812
2011-04-06	13	0	0.049	0.033	0.001	0.001	0	0.002	0.001	0.025	0	0.032	306.327	0.502	-0.25333
2011-04-06	14	0	0.032	0.02	0.001	0.001	0	0.002	0.001	0.029	0	0.035	307.49	0.456	-0.133623
2011-04-06	15	0.001	0.03	0.019	0.001	0.001	0	0.002	0.001	0.04	0	0.04	308.873	0.404	0.267834
2011-04-06	16	0.001	0.054	0.028	0.001	0.001	0	0.002	0.001	0.051	0	0.04	309.455	0.368	-0.257325
2011-04-06	17	0.002	0.034	0.021	0.001	0.001	0	0.002	0.001	0.058	0	0.04	305.339	0.527	-0.462206
2011-04-06	18	0.004	0.02	0.012	0.001	0.001	0	0.002	0.001	0.062	0	0.041	304.318	0.589	-0.38705
2011-04-06	19	0.006	0.024	0.012	0.001	0.001	0	0.002	0.002	0.073	0	0.043	303.185	0.62	-0.232475
2011-04-06	20	0.014	0.029	0.012	0.002	0.001	0	0.002	0.002	0.073	0.001	0.041	301.224	0.603	1.30684
2011-04-06	21	0.018	0.027	0.008	0.002	0.002	0.001	0.003	0.003	0.068	0.001	0.04	299.912	0.595	1.3638
2011-04-06	22	0.017	0.025	0.006	0.003	0.002	0.001	0.004	0.005	0.063	0.001	0.04	299.793	0.555	1.38279
2011-04-06	23	0.018	0.028	0.005	0.004	0.002	0.001	0.004	0.007	0.057	0.001	0.04	298.724	0.633	1.39291
2011-04-06	24	0.023	0.029	0.005	0.004	0.003	0.002	0.005	0.008	0.053	0.001	0.04	297.977	0.722	1.52112
2011-05-06	1	0.025	0.027	0.005	0.004	0.003	0.002	0.006	0.009	0.049	0.001	0.04	297.526	0.764	1.56474
2011-05-06	2	0.028	0.027	0.004	0.003	0.003	0.002	0.007	0.011	0.045	0.001	0.039	296.96	0.831	1.68784
2011-05-06	3	0.03	0.029	0.004	0.003	0.004	0.002	0.008	0.012	0.041	0.002	0.039	296.686	0.856	1.82248
2011-05-06	4	0.03	0.032	0.004	0.003	0.004	0.002	0.01	0.013	0.037	0.002	0.039	296.464	0.866	1.91793
2011-05-06	5	0.03	0.038	0.005	0.003	0.005	0.002	0.011	0.013	0.035	0.002	0.04	296.29	0.871	1.91346
2011-05-06	6	0.029	0.045	0.005	0.003	0.005	0.002	0.012	0.014	0.034	0.003	0.041	296.216	0.872	1.92141
2011-05-06	7	0.028	0.053	0.008	0.003	0.006	0.002	0.012	0.015	0.034	0.003	0.042	297.107	0.848	1.84218
2011-05-06	8	0.034	0.1	0.021	0.002	0.006	0.002	0.012	0.015	0.043	0.004	0.045	299.529	0.761	1.60411
2011-05-06	9	0.038	0.215	0.039	0.001	0.005	0.002	0.008	0.01	0.072	0.004	0.053	301.987	0.661	1.24382
2011-05-06	10	0.016	0.201	0.045	0	0.003	0.001	0.005	0.006	0.083	0.001	0.053	304.848	0.544	-0.779668
2011-05-06	11	0.004	0.178	0.043	0	0.002	0.001	0.004	0.004	0.075	0	0.051	306.951	0.457	-0.504001
2011-05-06	12	0.002	0.127	0.036	0	0.001	0	0.003	0.003	0.064	0	0.048	308.64	0.402	-0.450605
2011-05-06	13	0.001	0.094	0.031	0	0.001	0	0.003	0.002	0.054	0	0.045	310.444	0.349	-0.184521
2011-05-06	14	0.001	0.056	0.028	0	0.001	0	0.003	0.002	0.048	0	0.045	310.285	0.338	0.0909276
2011-05-06	15	0.001	0.035	0.026	0	0.001	0	0.003	0.002	0.051	0	0.047	308.763	0.376	0.0922228
2011-05-06	16	0.001	0.021	0.022	0	0.001	0	0.004	0.002	0.061	0	0.049	306.379	0.433	-0.199722
2011-05-06	17	0.004	0.022	0.019	0	0.002	0	0.004	0.002	0.074	0	0.049	307.691	0.368	-0.669016
2011-05-06	18	0.008	0.037	0.022	0	0.002	0	0.004	0.002	0.079	0	0.049	307.153	0.355	-0.623006
2011-05-06	19	0.005	0.048	0.017	0	0.002	0	0.004	0.002	0.086	0	0.048	305.953	0.366	-0.689319
2011-05-06	20	0.007	0.028	0.008	0.001	0.002	0	0.004	0.003	0.086	0	0.049	300.78	0.507	1.32987
2011-05-06	21	0.009	0.016	0.006	0.002	0.002	0.001	0.005	0.004	0.084	0	0.05	299.128	0.564	1.38076
2011-05-06	22	0.013	0.011	0.005	0.003	0.003	0.001	0.007	0.005	0.081	0	0.051	298.704	0.562	1.3753
2011-05-06	23	0.019	0.012	0.005	0.004	0.004	0.001	0.009	0.006	0.079	0.001	0.052	297.243	0.65	1.40598
2011-05-06	24	0.03	0.017	0.005	0.004	0.005	0.001	0.01	0.007	0.077	0.001	0.054	296.522	0.713	1.43009
2011-06-06	1	0.04	0.021	0.005	0.004	0.005	0.002	0.012	0.008	0.073	0.001	0.054	295.769	0.806	1.73513
2011-06-06	2	0.045	0.025	0.004	0.004	0.006	0.002	0.013	0.01	0.068	0.002	0.055	295.245	0.863	1.9741
2011-06-06	3	0.041	0.027	0.004	0.004	0.006	0.002	0.014	0.012	0.064	0.002	0.055	294.869	0.887	2.10182
2011-06-06	4	0.035	0.031	0.005	0.004	0.006	0.002	0.015	0.013	0.061	0.003	0.055	294.616	0.895	2.1035
2011-06-06	5	0.029	0.035	0.005	0.004	0.007	0.002	0.015	0.014	0.062	0.003	0.056	294.394	0.894	2.01843
2011-06-06	6	0.025	0.039	0.006	0.004	0.007	0.002	0.015	0.014	0.064	0.003	0.058	294.218	0.886	1.9197
2011-06-06	7	0.023	0.041	0.01	0.004	0.007	0.002	0.015	0.014	0.066	0.004	0.059	295.022	0.889	1.84571
2011-06-06	8	0.02	0.049	0.021	0.003	0.007	0.002	0.015	0.014	0.07	0.004	0.06	298.127	0.766	1.35814
2011-06-06	9	0.019	0.114	0.043	0.001	0.006	0.002	0.012	0.011	0.085	0.004	0.063	300.552	0.66	1.16394
2011-06-06	10	0.006	0.161	0.048	0.001	0.004	0.001	0.008	0.007	0.081	0.002	0.057	303.206	0.53	-0.268709
2011-06-06	11	0.002	0.178	0.048	0	0.003	0.001	0.006	0.004	0.063	0.001	0.049	305.513	0.425	-0.536086
2011-06-06	12	0.002	0.146	0.046	0	0.003	0.001	0.006	0.003	0.06	0.001	0.048	307.425	0.358	-0.514709
2011-06-06	13	0.001	0.118	0.045	0	0.002	0	0.006	0.003	0.065	0	0.052	309.388	0.298	-0.396231
2011-06-06	14	0.001	0.097	0.043	0	0.002	0	0.006	0.003	0.068	0	0.054	310.515	0.265	-0.378931
2011-06-06	15	0.002	0.082	0.04	0	0.002	0	0.005	0.003	0.068	0	0.053	310.491	0.26	-0.435785
2011-06-06	16	0.003	0.079	0.037	0	0.002	0	0.005	0.003	0.065	0	0.049	310.078	0.265	-0.633079
2011-06-06	17	0.005	0.083	0.035	0	0.002	0	0.005	0.003	0.065	0	0.046	309.257	0.276	-0.82905
2011-06-06	18	0.009	0.09	0.031	0	0.002	0.001	0.006	0.004	0.069	0	0.044	308.095	0.308	-1.09964
2011-06-06	19	0.022	0.09	0.02	0.001	0.003	0.001	0.006	0.004	0.068	0.001	0.043	305.599	0.389	1.36954
2011-06-06	20	0.038	0.086	0.014	0.002	0.003	0.001	0.007	0.006	0.063	0.001	0.043	302.734	0.385	1.28332
2011-06-06	21	0.051	0.088	0.011	0.003	0.003	0.001	0.008	0.007	0.059	0.001	0.044	300.909	0.399	1.24131
2011-06-06	22	0.053	0.093	0.009	0.004	0.004	0.002	0.01	0.009	0.055	0.001	0.045	299.605	0.438	1.29686
2011-06-06	23	0.049	0.094	0.007	0.004	0.004	0.002	0.011	0.011	0.052	0.001	0.046	298.378	0.527	1.34852
2011-06-06	24	0.041	0.092	0.005	0.005	0.005	0.002	0.011	0.013	0.049	0.002	0.047	297.42	0.625	1.43881
2011-07-06	1	0.031	0.099	0.004	0.005	0.005	0.002	0.011	0.013	0.05	0.002	0.048	296.65	0.695	1.48225
2011-07-06	2	0.021	0.096	0.003	0.005	0.005	0.002	0.01	0.013	0.051	0.002	0.048	296.14	0.733	1.51193
2011-07-06	3	0.011	0.092	0.003	0.005	0.004	0.002	0.009	0.012	0.058	0.002	0.047	295.919	0.742	1.50373
2011-07-06	4	0.007	0.09	0.004	0.005	0.004	0.002	0.007	0.011	0.061	0.001	0.046	295.804	0.743	1.48037
2011-07-06	5	0.005	0.082	0.004	0.005	0.004	0.002	0.005	0.009	0.061	0.001	0.045	295.753	0.74	0.178819
2011-07-06	6	0.004	0.067	0.004	0.004	0.003	0.001	0.004	0.008	0.059	0.001	0.043	295.773	0.738	0.119443
2011-07-06	7	0.004	0.045	0.004	0.004	0.003	0.001	0.004	0.007	0.058	0.001	0.042	296.5	0.758	0.123036
2011-07-06	8	0.005	0.027	0.006	0.003	0.003	0.001	0.004	0.007	0.057	0.001	0.039	299.752	0.661	-0.0572594
2011-07-06	9	0.003	0.026	0.013	0.002	0.002	0.001	0.003	0.004	0.043	0.001	0.033	302.083	0.582	-0.362401
2011-07-06	10	0.001	0.032	0.022	0.001	0.002	0.001	0.002	0.002	0.033	0.001	0.028	304.184	0.517	-0.377052
2011-07-06	11	0.001	0.022	0.022	0	0.001	0	0.001	0.001	0.026	0.001	0.024	306.374	0.453	-0.0519466
2011-07-06	12	0.001	0.014	0.02	0	0.001	0	0.001	0.001	0.021	0	0.02	307.988	0.41	-0.10658
2011-07-06	13	0	0.007	0.016	0	0.001	0	0.001	0.001	0.018	0	0.02	306.804	0.436	0.254133
2011-07-06	14	0	0.003	0.01	0	0	0	0.001	0.001	0.017	0	0.018	306.419	0.45	0.227969
2011-07-06	15	0.001	0.002	0.008	0.001	0.001	0	0.001	0.001	0.023	0	0.02	307.113	0.426	-0.272582
2011-07-06	16	0.002	0.002	0.005	0.001	0.001	0	0.001	0.001	0.026	0	0.019	305.158	0.502	-0.633612
2011-07-06	17	0.004	0.001	0.004	0.001	0.001	0	0.001	0.001	0.032	0	0.019	306.346	0.468	1.73014
2011-07-06	18	0.004	0.002	0.005	0.001	0.001	0	0.001	0.001	0.038	0	0.021	305.676	0.437	1.62498
2011-07-06	19	0.007	0.002	0.005	0.001	0.001	0	0.001	0.001	0.04	0	0.022	303.638	0.461	1.52317
2011-07-06	20	0.01	0.002	0.004	0.002	0.001	0	0.002	0.001	0.041	0	0.023	301.913	0.388	1.43842
2011-07-06	21	0.014	0.003	0.004	0.003	0.002	0	0.002	0.001	0.042	0	0.024	300.619	0.388	1.36394
2011-07-06	22	0.013	0.004	0.005	0.003	0.002	0	0.002	0.001	0.043	0	0.025	299.531	0.43	1.29242
2011-07-06	23	0.011	0.005	0.006	0.002	0.002	0	0.002	0.001	0.044	0	0.026	298.646	0.492	1.23695
2011-07-06	24	0.01	0.006	0.006	0.002	0.002	0	0.002	0.001	0.045	0	0.026	297.839	0.57	1.29661
2011-08-06	1	0.011	0.007	0.005	0.002	0.002	0.001	0.002	0.002	0.045	0	0.027	297.104	0.656	1.4408
2011-08-06	2	0.013	0.007	0.005	0.002	0.002	0.001	0.003	0.002	0.044	0	0.027	296.567	0.717	1.47853
2011-08-06	3	0.014	0.007	0.004	0.002	0.002	0.001	0.003	0.002	0.043	0.001	0.027	296.214	0.751	1.4988
2011-08-06	4	0.015	0.007	0.004	0.002	0.002	0.001	0.003	0.003	0.042	0.001	0.027	295.927	0.778	1.52769
2011-08-06	5	0.017	0.006	0.003	0.002	0.003	0.001	0.003	0.003	0.041	0.001	0.027	295.683	0.803	1.58895
2011-08-06	6	0.019	0.006	0.003	0.002	0.003	0.001	0.003	0.003	0.041	0.001	0.027	295.536	0.828	1.62949
2011-08-06	7	0.022	0.006	0.005	0.002	0.003	0.001	0.004	0.003	0.04	0.001	0.027	296.468	0.838	1.61674
2011-08-06	8	0.017	0.007	0.011	0.001	0.003	0.001	0.004	0.003	0.041	0.001	0.028	298.348	0.782	1.45504
2011-08-06	9	0.004	0.03	0.021	0.001	0.003	0.001	0.003	0.003	0.05	0.001	0.034	300.236	0.712	-0.0728245
2011-08-06	10	0.002	0.043	0.036	0	0.003	0.001	0.002	0.003	0.044	0.001	0.037	302.111	0.636	-0.269057
2011-08-06	11	0	0.049	0.05	0	0.002	0	0.002	0.002	0.036	0.001	0.041	303.776	0.571	0.195407
2011-08-06	12	0	0.04	0.045	0	0.001	0	0.001	0.002	0.029	0.001	0.039	305.3	0.522	-0.400877
2011-08-06	13	0	0.025	0.03	0	0.001	0	0.001	0.001	0.022	0	0.031	306.496	0.483	-0.511356
2011-08-06	14	0	0.015	0.021	0	0.001	0	0.001	0.001	0.018	0	0.027	306.787	0.474	-0.567393
2011-08-06	15	0	0.011	0.016	0	0.001	0	0.001	0.001	0.016	0	0.025	306.161	0.489	-0.569549
2011-08-06	16	0	0.017	0.015	0	0.001	0	0.001	0.001	0.016	0	0.025	305.16	0.52	-0.537536
2011-08-06	17	0	0.035	0.014	0	0.001	0	0.001	0.001	0.018	0	0.027	303.78	0.565	-0.471953
2011-08-06	18	0	0.055	0.013	0	0.001	0	0.001	0.001	0.02	0	0.031	302.318	0.613	-0.466691
2011-08-06	19	0	0.062	0.01	0.001	0.001	0	0.001	0.001	0.022	0	0.037	300.808	0.667	-0.472625
2011-08-06	20	0	0.056	0.008	0.001	0.001	0	0.001	0.001	0.026	0	0.051	299.173	0.723	-0.497224
2011-08-06	21	0	0.052	0.007	0.001	0.001	0	0.001	0.001	0.029	0	0.068	298.039	0.777	-0.474055
2011-08-06	22	0	0.047	0.006	0.001	0.001	0	0.001	0.001	0.03	0	0.083	297.272	0.816	-0.443403
2011-08-06	23	0	0.044	0.004	0.001	0.001	0	0.001	0.001	0.031	0	0.093	296.644	0.852	-0.399925
2011-08-06	24	0	0.05	0.004	0.001	0.001	0	0.001	0.001	0.031	0	0.093	296.07	0.893	-0.299373
2011-09-06	1	0	0.058	0.004	0	0.001	0	0.001	0.001	0.032	0	0.087	295.499	0.941	-0.0772692
2011-09-06	2	0	0.057	0.003	0	0.001	0	0.003	0.002	0.043	0	0.081	295.003	0.97	0.274936
2011-09-06	3	0	0.054	0.003	0	0.002	0	0.004	0.002	0.054	0	0.075	294.713	0.984	0.545694
2011-09-06	4	0.001	0.043	0.003	0	0.002	0	0.004	0.002	0.063	0	0.067	294.497	0.99	0.950571
2011-09-06	5	0.001	0.03	0.003	0.001	0.003	0	0.005	0.002	0.074	0	0.064	294.345	0.99	1.09596
2011-09-06	6	0.002	0.031	0.004	0	0.003	0	0.006	0.002	0.082	0	0.059	294.515	0.981	1.02231
2011-09-06	7	0.004	0.035	0.006	0	0.004	0	0.007	0.002	0.09	0	0.058	294.864	0.956	0.847938
2011-09-06	8	0.007	0.074	0.013	0.001	0.004	0	0.007	0.002	0.084	0.002	0.05	296.78	0.862	1.46059
2011-09-06	9	0.003	0.161	0.025	0	0.003	0	0.004	0.002	0.053	0	0.035	299.036	0.758	-0.020534
2011-09-06	10	0.001	0.157	0.024	0	0.002	0	0.003	0.001	0.039	0	0.031	301.256	0.655	-0.24653
2011-09-06	11	0.001	0.141	0.02	0	0.001	0	0.002	0.001	0.027	0	0.027	303.216	0.571	0.0769357
2011-09-06	12	0.001	0.096	0.017	0	0.001	0	0.002	0.001	0.023	0	0.024	305.155	0.491	0.110022
2011-09-06	13	0.001	0.06	0.015	0	0.001	0	0.001	0.001	0.022	0	0.021	306.771	0.433	-0.0573875
2011-09-06	14	0.001	0.046	0.015	0	0.001	0	0.001	0.001	0.024	0	0.021	307.544	0.412	-0.241117
2011-09-06	15	0.001	0.023	0.014	0	0.001	0	0.001	0.001	0.024	0	0.024	305.063	0.488	0.090775
2011-09-06	16	0.001	0.009	0.01	0	0.001	0	0.001	0.001	0.027	0	0.025	303.707	0.552	-0.0265484
2011-09-06	17	0.002	0.007	0.009	0.001	0.001	0	0.002	0.001	0.031	0	0.023	304.165	0.556	-0.494586
2011-09-06	18	0.006	0.011	0.007	0.001	0.001	0	0.003	0.001	0.038	0	0.023	304.135	0.579	1.60008
2011-09-06	19	0.014	0.019	0.007	0.001	0.001	0	0.003	0.001	0.037	0	0.022	303.518	0.601	1.58695
2011-09-06	20	0.023	0.025	0.008	0.001	0.002	0	0.004	0.002	0.036	0	0.023	302.031	0.567	1.47508
2011-09-06	21	0.032	0.031	0.009	0.001	0.002	0	0.005	0.002	0.037	0	0.025	300.747	0.556	1.38693
2011-09-06	22	0.04	0.036	0.01	0.001	0.002	0.001	0.006	0.003	0.037	0	0.026	299.675	0.59	1.40918
2011-09-06	23	0.046	0.04	0.01	0.001	0.003	0.001	0.007	0.004	0.035	0.001	0.026	298.716	0.647	1.41584
2011-09-06	24	0.046	0.04	0.009	0.001	0.003	0.001	0.008	0.004	0.033	0.001	0.027	297.936	0.71	1.52848
2011-10-06	1	0.041	0.04	0.009	0.001	0.004	0.001	0.009	0.005	0.031	0.001	0.027	297.242	0.774	1.71224
2011-10-06	2	0.028	0.037	0.009	0.001	0.004	0.001	0.008	0.006	0.031	0.001	0.028	296.778	0.808	1.61831
2011-10-06	3	0.019	0.035	0.01	0.001	0.004	0.001	0.008	0.007	0.03	0.001	0.028	296.617	0.799	1.51249
2011-10-06	4	0.015	0.034	0.01	0.002	0.004	0.001	0.007	0.008	0.027	0.001	0.028	296.428	0.797	1.48874
2011-10-06	5	0.015	0.038	0.01	0.002	0.004	0.002	0.007	0.01	0.023	0.001	0.028	296.247	0.8	1.54008
2011-10-06	6	0.017	0.044	0.011	0.002	0.004	0.002	0.007	0.011	0.018	0.001	0.027	296.366	0.775	1.53715
2011-10-06	7	0.018	0.045	0.015	0.002	0.004	0.002	0.007	0.012	0.014	0.002	0.026	297.262	0.773	1.60978
2011-10-06	8	0.017	0.048	0.029	0.001	0.004	0.002	0.007	0.012	0.014	0.002	0.026	299.99	0.701	1.47959
2011-10-06	9	0.012	0.147	0.046	0	0.004	0.001	0.005	0.008	0.036	0.001	0.031	301.915	0.623	-1.04867
2011-10-06	10	0.001	0.165	0.035	0	0.002	0	0.002	0.003	0.039	0	0.036	303.659	0.544	-0.0942056
2011-10-06	11	0	0.117	0.029	0	0.001	0	0.001	0.002	0.03	0	0.038	305.018	0.506	-0.29056
2011-10-06	12	0	0.062	0.022	0	0	0	0.001	0.001	0.023	0	0.041	304.352	0.541	-0.655463
2011-10-06	13	0	0.026	0.015	0	0	0	0	0.001	0.019	0	0.042	303.478	0.611	-0.667884
2011-10-06	14	0	0.019	0.011	0.001	0	0	0	0.001	0.018	0	0.04	304.022	0.624	-0.657477
2011-10-06	15	0	0.019	0.011	0.001	0	0	0	0.001	0.019	0	0.041	305.916	0.497	-0.768237
2011-10-06	16	0	0.022	0.013	0.001	0	0	0	0.001	0.018	0	0.04	305.924	0.471	-0.80337
2011-10-06	17	0	0.029	0.014	0	0	0	0	0.001	0.018	0	0.041	304.79	0.485	-0.789811
2011-10-06	18	0	0.039	0.012	0.001	0	0	0.001	0.001	0.022	0	0.041	303.3	0.518	-0.693684
2011-10-06	19	0	0.049	0.011	0.001	0	0	0.001	0.001	0.024	0	0.041	301.541	0.57	-0.609354
2011-10-06	20	0	0.058	0.009	0.001	0.001	0	0.001	0.001	0.026	0	0.041	299.719	0.607	-0.505991
2011-10-06	21	0	0.072	0.008	0.001	0.001	0	0.001	0.001	0.028	0	0.041	298.367	0.666	-0.399699
2011-10-06	22	0	0.081	0.008	0.001	0.001	0	0.001	0.001	0.03	0	0.04	297.873	0.675	-0.306524
2011-10-06	23	0	0.082	0.01	0.001	0.001	0	0.002	0.001	0.033	0	0.039	297.328	0.707	-0.103029
2011-10-06	24	0.001	0.083	0.016	0.001	0.001	0	0.002	0.001	0.037	0	0.038	296.9	0.748	-0.00247998
2011-11-06	1	0.001	0.088	0.026	0.001	0.002	0	0.002	0.001	0.041	0	0.037	296.447	0.8	-0.00453548
2011-11-06	2	0.002	0.09	0.035	0	0.002	0.001	0.003	0.002	0.046	0	0.036	296.117	0.831	0.0742067
2011-11-06	3	0.003	0.09	0.04	0	0.003	0.001	0.004	0.003	0.051	0	0.035	295.834	0.848	0.209232
2011-11-06	4	0.006	0.09	0.038	0	0.003	0.001	0.004	0.003	0.053	0.001	0.035	295.594	0.857	-0.485515
2011-11-06	5	0.012	0.092	0.032	0	0.004	0.001	0.005	0.004	0.049	0.002	0.034	295.351	0.863	-0.171801
2011-11-06	6	0.015	0.097	0.026	0	0.004	0.001	0.006	0.004	0.045	0.002	0.032	295.281	0.861	0.166628
2011-11-06	7	0.018	0.111	0.031	0	0.005	0.001	0.007	0.004	0.042	0.002	0.031	295.767	0.859	0.152656
2011-11-06	8	0.033	0.168	0.045	0	0.005	0.001	0.006	0.004	0.042	0.003	0.03	297.92	0.785	0.0635118
2011-11-06	9	0.047	0.215	0.038	0	0.004	0.001	0.004	0.003	0.044	0.002	0.028	300.462	0.688	1.17102
2011-11-06	10	0.039	0.21	0.037	0	0.002	0	0.002	0.002	0.046	0.001	0.027	303.406	0.569	0.386616
2011-11-06	11	0.021	0.177	0.044	0	0.001	0	0.001	0.001	0.047	0	0.026	306.077	0.468	-1.02177
2011-11-06	12	0.005	0.082	0.036	0	0	0	0.001	0.001	0.039	0	0.022	307.962	0.412	-1.46491
2011-11-06	13	0.001	0.032	0.025	0	0	0	0.001	0	0.028	0	0.026	307.068	0.425	0.150494
2011-11-06	14	0	0.007	0.014	0	0	0	0	0	0.021	0	0.025	305.747	0.495	-0.41403
2011-11-06	15	0	0.002	0.008	0	0	0	0.001	0	0.021	0	0.024	306.621	0.471	-0.242986
2011-11-06	16	0	0.002	0.007	0	0	0	0.001	0	0.02	0	0.023	304.354	0.57	-0.18391
2011-11-06	17	0	0.002	0.006	0	0	0	0.001	0	0.017	0	0.02	302.537	0.675	-0.176399
2011-11-06	18	0	0.004	0.006	0	0	0	0.001	0	0.016	0	0.019	301.533	0.767	-0.149991
2011-11-06	19	0	0.016	0.007	0	0	0	0.001	0.001	0.018	0	0.024	300.768	0.795	-0.188634
2011-11-06	20	0	0.043	0.009	0.001	0.001	0	0.001	0.001	0.026	0	0.035	299.502	0.747	-0.241209
2011-11-06	21	0.001	0.054	0.008	0.001	0.001	0	0.001	0.001	0.037	0	0.04	298.169	0.764	-0.0367552
2011-11-06	22	0.001	0.061	0.008	0.001	0.001	0	0.002	0.001	0.048	0	0.041	297.185	0.79	0.00105904
2011-11-06	23	0.002	0.064	0.008	0.001	0.002	0	0.002	0.002	0.055	0	0.04	296.447	0.822	0.0317766
2011-11-06	24	0.004	0.062	0.008	0.001	0.002	0.001	0.003	0.003	0.057	0	0.037	295.876	0.855	0.318418
2011-12-06	1	0.011	0.056	0.007	0.001	0.003	0.001	0.004	0.004	0.049	0.001	0.032	295.363	0.89	1.62069
2011-12-06	2	0.013	0.049	0.008	0.001	0.003	0.001	0.005	0.005	0.04	0.001	0.029	294.992	0.91	1.68063
2011-12-06	3	0.012	0.045	0.009	0.001	0.003	0.001	0.005	0.005	0.033	0.001	0.027	294.712	0.917	1.64341
2011-12-06	4	0.011	0.046	0.012	0.001	0.004	0.001	0.005	0.006	0.029	0.001	0.026	294.484	0.921	1.6612
2011-12-06	5	0.012	0.05	0.014	0.001	0.004	0.001	0.005	0.006	0.027	0.002	0.025	294.274	0.924	1.70947
2011-12-06	6	0.014	0.052	0.016	0.001	0.004	0.001	0.005	0.007	0.025	0.002	0.025	294.192	0.924	1.78743
2011-12-06	7	0.018	0.054	0.021	0.001	0.004	0.001	0.005	0.007	0.025	0.003	0.024	295.097	0.924	1.92546
2011-12-06	8	0.018	0.049	0.033	0.001	0.004	0.001	0.005	0.007	0.025	0.003	0.024	297.68	0.833	1.47759
2011-12-06	9	0.004	0.215	0.073	0	0.004	0.001	0.003	0.005	0.031	0.001	0.025	299.654	0.753	-0.0603403
2011-12-06	10	0.002	0.199	0.059	0	0.003	0	0.002	0.003	0.033	0	0.026	301.784	0.666	-0.30704
2011-12-06	11	0.002	0.181	0.054	0	0.002	0	0.001	0.002	0.037	0	0.027	303.598	0.583	-0.475692
2011-12-06	12	0.001	0.055	0.032	0	0.001	0	0.001	0.001	0.031	0	0.03	303.553	0.574	0.0891718
2011-12-06	13	0.001	0.006	0.013	0	0	0	0.001	0.001	0.025	0	0.024	304.455	0.543	0.0689877
2011-12-06	14	0.001	0.001	0.007	0	0	0	0	0.001	0.017	0	0.014	304.355	0.571	-0.334565
2011-12-06	15	0.001	0	0.004	0.001	0	0	0	0	0.014	0	0.011	304.153	0.569	-0.331089
2011-12-06	16	0.002	0.001	0.004	0.001	0	0	0	0	0.013	0	0.01	305.453	0.498	-0.595293
2011-12-06	17	0.002	0.001	0.005	0.001	0	0	0	0	0.014	0	0.01	304.93	0.508	-0.708683
2011-12-06	18	0.002	0.001	0.004	0	0	0	0	0	0.015	0	0.009	304.061	0.519	0.0833557
2011-12-06	19	0.004	0.001	0.005	0	0	0	0.001	0	0.016	0	0.009	303.339	0.519	-0.552851
2011-12-06	20	0.012	0.002	0.005	0	0	0	0.001	0.001	0.016	0	0.009	301.147	0.579	0.533773
2011-12-06	21	0.02	0.003	0.005	0	0	0	0.001	0.001	0.016	0	0.009	299.463	0.62	0.934098
2011-12-06	22	0.023	0.003	0.005	0	0	0	0.001	0.001	0.017	0	0.01	298.179	0.668	1.06641
2011-12-06	23	0.022	0.004	0.006	0	0	0	0.001	0.001	0.019	0	0.011	297.152	0.724	1.15198
2011-12-06	24	0.021	0.005	0.006	0	0.001	0	0.001	0.001	0.021	0	0.012	296.294	0.786	1.30432
06/13/2011	1	0.019	0.006	0.007	0	0.001	0	0.001	0.001	0.022	0	0.013	295.56	0.852	1.37468
06/13/2011	2	0.019	0.008	0.008	0	0.001	0	0.002	0.001	0.024	0	0.015	295.084	0.888	1.4824
06/13/2011	3	0.018	0.009	0.009	0	0.001	0	0.002	0.002	0.025	0	0.016	294.838	0.897	1.506
06/13/2011	4	0.017	0.012	0.01	0	0.002	0.001	0.002	0.003	0.027	0.001	0.018	294.681	0.896	1.5689
06/13/2011	5	0.017	0.015	0.012	0	0.002	0.001	0.003	0.004	0.028	0.001	0.02	294.568	0.893	1.45977
06/13/2011	6	0.018	0.018	0.014	0.001	0.003	0.001	0.004	0.004	0.028	0.001	0.022	294.569	0.886	1.71968
06/13/2011	7	0.022	0.022	0.02	0.001	0.003	0.001	0.005	0.005	0.028	0.001	0.023	295.581	0.878	1.77026
06/13/2011	8	0.023	0.024	0.034	0.001	0.004	0.001	0.005	0.006	0.028	0.002	0.024	298.714	0.79	1.45264
06/13/2011	9	0.011	0.142	0.084	0	0.004	0.001	0.004	0.006	0.032	0.001	0.027	300.97	0.695	-1.35822
06/13/2011	10	0.002	0.249	0.081	0	0.003	0.001	0.002	0.003	0.032	0	0.03	303.211	0.592	-0.288203
06/13/2011	11	0.001	0.142	0.055	0	0.001	0	0.001	0.002	0.023	0	0.023	304.673	0.522	-0.0275183
06/13/2011	12	0.001	0.076	0.036	0	0.001	0	0.001	0.001	0.018	0	0.018	306.395	0.461	-0.0616257
06/13/2011	13	0	0.038	0.026	0	0.001	0	0.001	0.001	0.018	0	0.018	308.68	0.391	0.0243605
06/13/2011	14	0	0.018	0.02	0	0	0	0.001	0.001	0.02	0	0.019	309.744	0.36	0.0462307
06/13/2011	15	0.001	0.012	0.017	0	0.001	0	0.001	0.002	0.023	0	0.019	309.229	0.372	-0.601687
06/13/2011	16	0.002	0.012	0.015	0	0.001	0	0.001	0.002	0.023	0	0.019	308.48	0.401	-0.657691
06/13/2011	17	0.003	0.012	0.013	0	0.001	0	0.001	0.002	0.023	0	0.017	307.266	0.439	-0.749907
06/13/2011	18	0.004	0.016	0.009	0.001	0.001	0	0.001	0.002	0.022	0	0.016	306.003	0.482	-0.671166
06/13/2011	19	0.006	0.016	0.006	0.001	0.001	0	0.001	0.002	0.022	0	0.015	304.331	0.56	1.60237
06/13/2011	20	0.008	0.013	0.004	0.002	0.001	0.001	0.002	0.003	0.019	0	0.014	302.379	0.601	1.76056
06/13/2011	21	0.008	0.011	0.003	0.002	0.001	0.001	0.002	0.003	0.017	0	0.014	301.162	0.608	1.76113
06/13/2011	22	0.007	0.009	0.002	0.003	0.001	0.001	0.002	0.004	0.016	0	0.014	299.92	0.646	1.79817
06/13/2011	23	0.007	0.008	0.002	0.003	0.001	0.001	0.003	0.004	0.014	0	0.014	298.782	0.671	1.76397
06/13/2011	24	0.009	0.007	0.003	0.003	0.001	0.001	0.003	0.005	0.013	0	0.014	297.924	0.701	1.74012
06/14/2011	1	0.011	0.007	0.003	0.003	0.002	0.001	0.003	0.005	0.012	0.001	0.015	297.019	0.746	1.68175
06/14/2011	2	0.012	0.007	0.004	0.002	0.002	0.001	0.003	0.006	0.011	0.001	0.015	296.372	0.777	1.66122
06/14/2011	3	0.013	0.008	0.004	0.002	0.002	0.001	0.004	0.006	0.01	0.001	0.015	295.994	0.789	1.69287
06/14/2011	4	0.016	0.009	0.004	0.002	0.002	0.001	0.004	0.007	0.01	0.001	0.015	295.714	0.799	1.71897
06/14/2011	5	0.02	0.011	0.005	0.001	0.002	0.001	0.004	0.007	0.009	0.001	0.015	295.489	0.808	1.74309
06/14/2011	6	0.026	0.014	0.006	0.001	0.002	0.001	0.004	0.008	0.008	0.001	0.015	295.361	0.816	1.994
06/14/2011	7	0.033	0.016	0.009	0.001	0.002	0.001	0.005	0.008	0.006	0.001	0.015	296.248	0.827	2.18881
06/14/2011	8	0.027	0.017	0.014	0.001	0.002	0.001	0.005	0.008	0.006	0.001	0.015	298.858	0.763	1.91314
06/14/2011	9	0.016	0.085	0.052	0	0.003	0.001	0.003	0.006	0.019	0.002	0.019	301.31	0.66	-1.19538
06/14/2011	10	0.004	0.163	0.056	0	0.002	0.001	0.002	0.003	0.032	0.001	0.024	303.73	0.555	-0.427048
06/14/2011	11	0.001	0.128	0.037	0	0.001	0	0.001	0.002	0.024	0	0.021	305.595	0.475	-0.337801
06/14/2011	12	0.001	0.077	0.026	0	0.001	0	0.001	0.002	0.02	0	0.019	307.414	0.404	-0.27124
06/14/2011	13	0.001	0.054	0.021	0	0.001	0	0.001	0.002	0.02	0	0.019	309.195	0.344	-0.308461
06/14/2011	14	0.001	0.045	0.02	0	0.001	0	0.001	0.002	0.022	0	0.021	310.239	0.311	-0.240683
06/14/2011	15	0.001	0.037	0.018	0	0.001	0	0.001	0.002	0.025	0	0.021	310.206	0.305	-0.536204
06/14/2011	16	0.002	0.03	0.016	0	0.001	0	0.001	0.002	0.025	0	0.02	309.78	0.314	-0.755055
06/14/2011	17	0.002	0.02	0.014	0	0.001	0	0.001	0.002	0.026	0	0.02	306.955	0.393	-0.771183
06/14/2011	18	0.002	0.011	0.009	0.001	0.001	0	0.001	0.002	0.026	0	0.02	304.495	0.497	-0.645725
06/14/2011	19	0.004	0.01	0.007	0.001	0.001	0	0.001	0.002	0.029	0	0.02	304.072	0.456	-0.626109
06/14/2011	20	0.007	0.013	0.008	0.002	0.001	0	0.002	0.002	0.033	0	0.021	302.336	0.478	1.38457
06/14/2011	21	0.016	0.017	0.01	0.001	0.001	0.001	0.002	0.003	0.032	0	0.021	300.942	0.487	1.34964
06/14/2011	22	0.023	0.022	0.013	0.001	0.001	0.001	0.003	0.003	0.031	0	0.021	299.894	0.515	1.28372
06/14/2011	23	0.028	0.025	0.016	0.001	0.001	0.001	0.003	0.003	0.031	0.001	0.021	298.764	0.587	1.19618
06/14/2011	24	0.026	0.025	0.017	0.001	0.001	0.001	0.003	0.003	0.034	0.001	0.022	297.538	0.693	1.25674
06/15/2011	1	0.019	0.023	0.015	0.001	0.001	0.001	0.003	0.003	0.038	0.001	0.024	296.413	0.808	1.36343
06/15/2011	2	0.01	0.021	0.012	0.001	0.001	0.001	0.003	0.002	0.045	0.001	0.027	295.837	0.861	1.46258
06/15/2011	3	0.004	0.02	0.009	0.001	0.002	0	0.003	0.002	0.051	0.001	0.029	295.697	0.859	1.48999
06/15/2011	4	0.004	0.017	0.007	0.001	0.002	0	0.002	0.002	0.052	0	0.031	295.448	0.881	1.59618
06/15/2011	5	0.004	0.014	0.006	0.001	0.002	0	0.002	0.001	0.053	0	0.032	295.362	0.888	0.382785
06/15/2011	6	0.004	0.011	0.005	0.001	0.002	0	0.002	0.001	0.054	0	0.032	295.231	0.908	0.480126
06/15/2011	7	0.004	0.009	0.004	0.001	0.002	0	0.002	0.001	0.058	0.001	0.032	296.386	0.886	1.73206
06/15/2011	8	0.004	0.009	0.005	0.001	0.002	0	0.002	0.001	0.056	0.001	0.031	298.593	0.838	1.64588
06/15/2011	9	0.003	0.025	0.011	0.001	0.003	0	0.002	0.001	0.046	0	0.031	300.779	0.738	-0.127638
06/15/2011	10	0.002	0.074	0.022	0	0.003	0	0.002	0.001	0.041	0	0.033	303.005	0.636	-0.266532
06/15/2011	11	0.002	0.085	0.033	0	0.003	0	0.002	0.002	0.041	0	0.031	305.06	0.549	-0.476471
06/15/2011	12	0.003	0.07	0.041	0	0.002	0	0.001	0.002	0.039	0.001	0.028	307.087	0.478	-0.606386
06/15/2011	13	0	0.024	0.027	0	0.001	0	0.001	0.001	0.024	0	0.032	305.492	0.491	-0.431581
06/15/2011	14	0	0.003	0.01	0	0	0	0.001	0.001	0.014	0	0.026	306.427	0.458	-0.736737
06/15/2011	15	0	0.001	0.005	0.001	0	0	0	0	0.014	0	0.022	305.772	0.501	-0.67285
06/15/2011	16	0	0.001	0.003	0	0	0	0	0	0.013	0	0.018	305.412	0.495	-0.590652
06/15/2011	17	0	0	0.002	0	0	0	0	0	0.011	0	0.015	304.156	0.508	-0.56825
06/15/2011	18	0.001	0	0.002	0	0	0	0	0	0.015	0	0.013	303.036	0.591	0.256391
06/15/2011	19	0.001	0.001	0.002	0.001	0	0	0	0	0.018	0	0.015	302.281	0.498	-0.124094
06/15/2011	20	0.002	0.003	0.002	0.002	0.001	0	0.001	0	0.027	0	0.018	300.357	0.572	-0.545281
06/15/2011	21	0.003	0.003	0.002	0.002	0.001	0	0.001	0.001	0.03	0	0.02	299.67	0.588	-0.428875
06/15/2011	22	0.003	0.003	0.002	0.003	0.001	0	0.001	0.001	0.032	0	0.021	299.883	0.53	-0.509703
06/15/2011	23	0.003	0.002	0.002	0.003	0.001	0	0.001	0.001	0.03	0	0.02	299.016	0.578	-0.438632
06/15/2011	24	0.001	0.001	0.002	0.002	0.001	0	0.001	0.001	0.024	0	0.022	297.648	0.67	-0.133301
06/16/2011	1	0	0.001	0.002	0.001	0.001	0	0.001	0	0.02	0	0.025	297.036	0.704	-0.216116
06/16/2011	2	0	0.002	0.003	0.001	0.001	0	0.001	0.001	0.023	0	0.03	296.781	0.703	-0.244123
06/16/2011	3	0	0.008	0.006	0.002	0.001	0	0.001	0.001	0.03	0	0.033	296.38	0.724	-0.0684
06/16/2011	4	0.001	0.015	0.007	0.002	0.003	0	0.001	0.001	0.036	0	0.036	296.261	0.722	-0.0549498
06/16/2011	5	0	0.013	0.007	0.003	0.002	0	0.001	0.001	0.028	0.001	0.032	296.05	0.722	-0.0783003
06/16/2011	6	0	0.009	0.007	0.002	0.002	0	0.001	0.001	0.022	0.001	0.032	295.829	0.725	-0.297505
06/16/2011	7	0	0.009	0.007	0.002	0.002	0	0.001	0.002	0.022	0.001	0.028	295.984	0.764	-0.122487
06/16/2011	8	0.001	0.011	0.008	0.002	0.002	0	0.001	0.002	0.024	0.001	0.026	298.09	0.706	-0.0264346
06/16/2011	9	0	0.014	0.011	0.001	0.002	0	0.001	0.002	0.018	0.001	0.02	299.344	0.661	-0.0118588
06/16/2011	10	0	0.008	0.009	0.001	0.001	0	0.001	0.001	0.014	0.001	0.016	300.731	0.633	0.0492313
06/16/2011	11	0.001	0.007	0.009	0.001	0.001	0	0.001	0.001	0.014	0.001	0.015	303.051	0.585	-0.0552018
06/16/2011	12	0	0.01	0.012	0	0.001	0	0	0.001	0.011	0	0.016	305.156	0.519	-0.476931
06/16/2011	13	0	0.008	0.011	0	0	0	0	0	0.009	0	0.018	306.854	0.485	-0.763754
06/16/2011	14	0	0.004	0.008	0	0	0	0	0	0.009	0	0.014	305.871	0.497	-0.66421
06/16/2011	15	0.001	0.001	0.005	0	0	0	0	0	0.011	0	0.009	305.145	0.531	0.193879
06/16/2011	16	0.002	0.001	0.003	0	0	0	0	0	0.009	0	0.005	305.085	0.504	-0.612355
06/16/2011	17	0.002	0	0.002	0	0	0	0	0	0.007	0	0.004	304.527	0.475	-0.674362
06/16/2011	18	0.006	0	0.002	0	0	0	0	0	0.006	0	0.003	303.28	0.463	-0.238639
06/16/2011	19	0.013	0	0.001	0	0	0	0	0	0.005	0	0.003	302.127	0.518	0.187422
06/16/2011	20	0.019	0.001	0.002	0	0	0	0	0	0.005	0	0.003	300.886	0.563	0.469415
06/16/2011	21	0.016	0	0.002	0	0	0	0.001	0	0.004	0	0.003	299.697	0.617	0.934793
06/16/2011	22	0.009	0	0.002	0	0	0	0	0	0.003	0	0.002	299.23	0.635	0.304842
06/16/2011	23	0.006	0	0.001	0	0	0	0	0	0.002	0	0.001	298.761	0.679	0.286384
06/16/2011	24	0.004	0	0.001	0	0	0	0	0	0.003	0	0.001	298.039	0.761	0.378983
06/17/2011	1	0.002	0.001	0.001	0	0	0	0	0	0.003	0	0.002	297.288	0.858	0.20723
06/17/2011	2	0.001	0.001	0.001	0	0	0	0	0	0.005	0	0.004	296.824	0.919	0.512005
06/17/2011	3	0.001	0	0.001	0	0	0	0	0	0.006	0	0.003	296.623	0.921	0.609298
06/17/2011	4	0.002	0	0.001	0	0	0	0	0	0.005	0	0.003	296.453	0.925	0.692771
06/17/2011	5	0.004	0	0.001	0	0.001	0	0	0	0.004	0	0.003	296.456	0.906	0.903687
06/17/2011	6	0.005	0	0.001	0	0.001	0	0	0	0.003	0	0.002	296.49	0.911	1.13104
06/17/2011	7	0.005	0	0.001	0	0.001	0	0	0	0.003	0	0.002	297.599	0.862	0.843546
06/17/2011	8	0.003	0.002	0.002	0	0	0	0	0	0.005	0	0.003	299.077	0.811	0.190727
06/17/2011	9	0	0.016	0.008	0	0	0	0	0	0.006	0	0.01	300.129	0.772	-0.404736
06/17/2011	10	0	0.039	0.021	0	0.001	0	0	0	0.009	0	0.013	301.047	0.728	-0.33072
06/17/2011	11	0	0.046	0.025	0	0.001	0	0	0	0.01	0	0.015	301.911	0.691	-0.399433
06/17/2011	12	0	0.038	0.023	0	0.001	0	0	0	0.01	0	0.015	302.395	0.669	-0.418227
06/17/2011	13	0	0.032	0.02	0	0	0	0	0	0.01	0	0.016	302.44	0.662	-0.513453
06/17/2011	14	0	0.03	0.019	0	0	0	0	0	0.01	0	0.019	302.315	0.659	-0.580477
06/17/2011	15	0	0.027	0.02	0	0	0	0	0	0.009	0	0.023	302.297	0.657	-0.648875
06/17/2011	16	0	0.025	0.022	0	0	0	0	0	0.01	0	0.028	302.163	0.656	-0.663393
06/17/2011	17	0	0.025	0.022	0	0	0	0	0.001	0.01	0	0.028	301.762	0.659	-0.660001
06/17/2011	18	0	0.028	0.019	0	0.001	0	0	0.001	0.011	0	0.029	301.027	0.674	-0.624803
06/17/2011	19	0	0.041	0.013	0	0.001	0	0.001	0.001	0.012	0	0.031	299.993	0.699	-0.570644
06/17/2011	20	0	0.059	0.008	0.001	0.001	0	0.001	0.001	0.017	0	0.036	298.361	0.741	-0.484996
06/17/2011	21	0	0.063	0.005	0.001	0.001	0	0.001	0.001	0.022	0	0.039	297.516	0.763	-0.404539
06/17/2011	22	0	0.053	0.005	0.001	0.002	0	0.001	0.002	0.026	0	0.037	296.821	0.805	-0.193053
06/17/2011	23	0.001	0.042	0.005	0.001	0.002	0	0.001	0.002	0.028	0	0.03	296.412	0.831	0.00799099
06/17/2011	24	0.001	0.033	0.004	0.001	0.003	0.001	0.001	0.002	0.029	0	0.024	296.744	0.805	-0.00626553
06/18/2011	1	0.003	0.029	0.004	0.001	0.003	0.001	0.002	0.001	0.029	0	0.02	296.386	0.834	0.152227
06/18/2011	2	0.003	0.026	0.003	0.001	0.003	0.001	0.002	0.001	0.03	0	0.02	296.104	0.864	1.78134
06/18/2011	3	0.003	0.023	0.002	0.001	0.002	0.001	0.002	0.001	0.029	0	0.019	295.836	0.891	1.91694
06/18/2011	4	0.005	0.021	0.002	0.002	0.002	0.001	0.002	0.002	0.026	0	0.017	296.467	0.86	1.85275
06/18/2011	5	0.004	0.027	0.005	0.002	0.003	0.001	0.003	0.002	0.023	0.001	0.016	296.422	0.876	1.70944
06/18/2011	6	0.003	0.038	0.009	0.001	0.003	0.001	0.003	0.002	0.022	0.001	0.017	296.496	0.886	0.31961
06/18/2011	7	0.003	0.044	0.011	0.001	0.003	0.001	0.003	0.002	0.022	0.001	0.017	297.101	0.896	0.342262
06/18/2011	8	0.003	0.056	0.018	0.001	0.004	0	0.003	0.002	0.023	0.001	0.019	299.218	0.826	0.0407831
06/18/2011	9	0.002	0.083	0.032	0.001	0.004	0	0.002	0.002	0.023	0.002	0.02	301.333	0.743	-0.198151
06/18/2011	10	0.001	0.092	0.038	0.001	0.003	0	0.002	0.001	0.021	0.002	0.021	303.409	0.664	-0.128012
06/18/2011	11	0.001	0.085	0.039	0.001	0.002	0	0.001	0.001	0.017	0.001	0.02	305.451	0.59	0.0600157
06/18/2011	12	0	0.067	0.031	0.001	0.002	0	0.001	0.001	0.014	0.001	0.018	307.212	0.526	0.130309
06/18/2011	13	0	0.053	0.027	0.001	0.002	0	0.001	0.001	0.012	0.001	0.018	307.5	0.487	-0.334286
06/18/2011	14	0	0.039	0.023	0.001	0.001	0	0.001	0	0.011	0.001	0.018	308.483	0.447	-0.644989
06/18/2011	15	0	0.014	0.015	0.001	0.001	0	0	0	0.01	0	0.016	306.154	0.537	-0.588345
06/18/2011	16	0.001	0.003	0.006	0.001	0.001	0	0	0	0.015	0	0.016	305.75	0.518	0.0999673
06/18/2011	17	0.002	0.001	0.004	0.001	0.001	0	0.001	0	0.02	0	0.014	305.792	0.473	-0.712005
06/18/2011	18	0.003	0.001	0.003	0.001	0.001	0	0.001	0	0.024	0	0.013	305.011	0.548	1.77566
06/18/2011	19	0.005	0.001	0.002	0.001	0.001	0	0.001	0	0.026	0	0.014	304.015	0.55	1.80417
06/18/2011	20	0.008	0.002	0.003	0.001	0.001	0	0.001	0	0.028	0	0.015	301.995	0.562	1.62582
06/18/2011	21	0.006	0.002	0.003	0.001	0.001	0	0.001	0	0.029	0	0.016	300.471	0.588	1.57663
06/18/2011	22	0.003	0.002	0.003	0.002	0.001	0	0.001	0	0.031	0	0.017	299.223	0.703	1.61255
06/18/2011	23	0.003	0.002	0.002	0.003	0.002	0	0.001	0	0.03	0	0.02	298.525	0.758	-0.12935
06/18/2011	24	0.001	0.011	0.006	0.004	0.003	0	0.001	0.001	0.027	0	0.026	300.031	0.68	-0.0887223
06/19/2011	1	0	0.028	0.012	0.005	0.003	0	0.001	0.002	0.024	0.001	0.031	299.772	0.72	-0.0845204
06/19/2011	2	0.001	0.032	0.013	0.005	0.004	0.001	0.002	0.003	0.023	0.001	0.03	299.354	0.766	0.0483199
06/19/2011	3	0.001	0.033	0.016	0.005	0.004	0.001	0.002	0.003	0.021	0.001	0.025	299.014	0.788	0.0187966
06/19/2011	4	0.002	0.028	0.015	0.004	0.004	0.001	0.002	0.003	0.021	0.002	0.022	298.57	0.799	-0.022812
06/19/2011	5	0.002	0.022	0.014	0.003	0.004	0.001	0.002	0.003	0.023	0.002	0.02	298.24	0.827	0.0780991
06/19/2011	6	0.003	0.02	0.014	0.003	0.004	0.001	0.002	0.003	0.023	0.002	0.019	297.928	0.862	0.188354
06/19/2011	7	0.003	0.02	0.016	0.002	0.004	0.001	0.002	0.002	0.023	0.002	0.018	298.465	0.876	0.241043
06/19/2011	8	0.003	0.022	0.02	0.002	0.004	0	0.002	0.002	0.025	0.002	0.018	300.478	0.808	1.41785
06/19/2011	9	0.003	0.028	0.027	0.002	0.003	0	0.002	0.002	0.025	0.002	0.018	302.103	0.733	-0.19919
06/19/2011	10	0.003	0.032	0.028	0.002	0.003	0	0.001	0.001	0.024	0.002	0.018	303.763	0.658	-0.371531
06/19/2011	11	0.002	0.041	0.027	0.001	0.003	0	0.001	0.001	0.023	0.001	0.019	305.543	0.583	-0.47606
06/19/2011	12	0.001	0.055	0.029	0.001	0.002	0	0.001	0.001	0.019	0.001	0.019	307.601	0.495	-0.140005
06/19/2011	13	0	0.045	0.027	0.001	0.001	0	0.001	0.001	0.017	0.001	0.018	308.683	0.439	0.0940698
06/19/2011	14	0	0.037	0.023	0.001	0.001	0	0.001	0	0.016	0.001	0.019	309.008	0.396	-0.171999
06/19/2011	15	0	0.027	0.017	0	0.001	0	0.001	0	0.016	0	0.02	308.813	0.402	-0.383126
06/19/2011	16	0	0.015	0.012	0.001	0.001	0	0	0	0.017	0	0.021	308.45	0.377	-0.532266
06/19/2011	17	0	0.009	0.008	0.001	0.001	0	0.001	0.001	0.021	0	0.021	308.859	0.361	0.12431
06/19/2011	18	0.001	0.007	0.006	0.001	0.001	0	0.001	0.001	0.024	0	0.02	308.128	0.392	-0.383589
06/19/2011	19	0.003	0.007	0.005	0.001	0.001	0	0.001	0.001	0.028	0	0.02	306.374	0.405	-0.76557
06/19/2011	20	0.004	0.01	0.003	0.002	0.001	0	0.001	0.001	0.032	0	0.021	303.691	0.453	-0.63442
06/19/2011	21	0.004	0.01	0.003	0.003	0.002	0	0.001	0.001	0.033	0	0.022	303.153	0.451	-0.605511
06/19/2011	22	0.002	0.008	0.004	0.003	0.002	0	0.001	0.001	0.031	0	0.023	302.358	0.515	-0.652103
06/19/2011	23	0.001	0.009	0.006	0.003	0.002	0	0.001	0.001	0.027	0	0.025	300.442	0.642	-0.10445
06/19/2011	24	0.001	0.011	0.008	0.002	0.002	0	0.001	0.002	0.025	0	0.028	299.875	0.686	0.0224507
06/20/2011	1	0.001	0.014	0.007	0.003	0.002	0	0.001	0.002	0.025	0.001	0.028	299.368	0.746	-0.00553289
06/20/2011	2	0.001	0.029	0.011	0.003	0.003	0	0.001	0.002	0.021	0.001	0.022	299.043	0.784	-0.0498201
06/20/2011	3	0.001	0.039	0.013	0.002	0.002	0	0.001	0.002	0.015	0.001	0.016	298.827	0.8	-0.0684567
06/20/2011	4	0.001	0.04	0.013	0.002	0.002	0	0.001	0.002	0.012	0.001	0.014	298.616	0.812	-0.0555824
06/20/2011	5	0.002	0.036	0.012	0.002	0.003	0	0.001	0.002	0.011	0.001	0.012	298.37	0.828	-0.0650694
06/20/2011	6	0.002	0.031	0.011	0.003	0.003	0.001	0.001	0.003	0.011	0.001	0.011	298.091	0.847	0.0904604
06/20/2011	7	0.003	0.028	0.01	0.003	0.004	0.001	0.001	0.003	0.01	0.001	0.011	298.641	0.848	1.594
06/20/2011	8	0.004	0.037	0.014	0.003	0.004	0.001	0.001	0.003	0.008	0.002	0.01	300.58	0.766	1.54631
06/20/2011	9	0.003	0.068	0.026	0.002	0.003	0	0.001	0.002	0.009	0.001	0.009	302.248	0.7	1.31885
06/20/2011	10	0.001	0.078	0.034	0.001	0.002	0	0.001	0.001	0.009	0.001	0.009	303.916	0.632	-0.49514
06/20/2011	11	0	0.052	0.029	0.001	0.001	0	0	0.001	0.008	0.001	0.01	304.367	0.598	-0.0703602
06/20/2011	12	0	0.037	0.025	0.001	0.001	0	0	0.001	0.008	0.001	0.012	305.976	0.531	-0.443477
06/20/2011	13	0	0.024	0.021	0	0.001	0	0	0.001	0.008	0.001	0.013	307.633	0.478	-0.587731
06/20/2011	14	0	0.014	0.017	0	0.001	0	0	0	0.008	0	0.015	307.743	0.483	-0.718048
06/20/2011	15	0	0.006	0.012	0	0	0	0	0	0.008	0	0.013	305.986	0.51	-0.674324
06/20/2011	16	0	0.002	0.007	0	0	0	0	0	0.01	0	0.011	306.245	0.476	-0.244681
06/20/2011	17	0.001	0.001	0.004	0	0	0	0	0	0.012	0	0.009	305.26	0.49	-0.0712376
06/20/2011	18	0.003	0.001	0.002	0	0	0	0.001	0	0.014	0	0.008	303.805	0.675	-0.0658061
06/20/2011	19	0.003	0	0.001	0.001	0	0	0.001	0	0.012	0	0.007	302.35	0.614	1.92448
06/20/2011	20	0.001	0	0.001	0.001	0	0	0.001	0	0.01	0	0.006	300.053	0.669	-0.486096
06/20/2011	21	0.001	0	0.001	0.001	0.001	0	0	0	0.008	0	0.005	299.011	0.701	-0.244424
06/20/2011	22	0.001	0	0.001	0.001	0.001	0	0	0	0.005	0	0.005	298.357	0.749	-0.319241
06/20/2011	23	0.001	0.001	0.001	0.001	0.001	0	0	0	0.006	0	0.006	297.759	0.797	-0.181871
06/20/2011	24	0.001	0.002	0.001	0.002	0.001	0	0	0	0.009	0	0.008	297.29	0.832	-0.103157
06/21/2011	1	0.001	0.004	0.001	0.003	0.002	0	0.001	0.001	0.011	0	0.01	296.957	0.842	-0.0524226
06/21/2011	2	0.002	0.009	0.002	0.002	0.003	0	0.001	0.001	0.01	0	0.009	296.93	0.833	-0.0305387
06/21/2011	3	0.003	0.009	0.002	0.002	0.003	0	0.001	0.001	0.008	0	0.007	296.956	0.838	1.79906
06/21/2011	4	0.003	0.009	0.001	0.002	0.003	0	0.001	0.001	0.007	0	0.007	297.032	0.843	1.91684
06/21/2011	5	0.004	0.009	0.001	0.002	0.003	0	0.001	0.001	0.005	0	0.006	297.075	0.861	1.95614
06/21/2011	6	0.004	0.01	0.001	0.002	0.003	0	0.001	0.001	0.005	0	0.006	297.126	0.885	2.0135
06/21/2011	7	0.005	0.013	0.001	0.001	0.003	0	0.001	0.001	0.004	0	0.006	297.958	0.895	2.11649
06/21/2011	8	0.005	0.019	0.002	0.002	0.002	0	0.001	0.001	0.004	0	0.006	299.652	0.849	1.93532
06/21/2011	9	0.002	0.037	0.005	0.001	0.002	0	0.001	0.001	0.006	0	0.006	301.169	0.786	1.75635
06/21/2011	10	0.001	0.043	0.008	0.001	0.001	0	0.001	0.001	0.005	0	0.006	302.444	0.73	-0.383099
06/21/2011	11	0	0.026	0.007	0.001	0.001	0	0	0	0.004	0	0.007	302.2	0.718	-0.398189
06/21/2011	12	0	0.006	0.004	0	0	0	0	0	0.004	0	0.008	302.352	0.709	-0.538064
06/21/2011	13	0	0.002	0.003	0	0	0	0	0	0.005	0	0.007	303.147	0.68	-0.410881
06/21/2011	14	0	0.001	0.002	0	0	0	0	0	0.006	0	0.007	303.033	0.679	-0.221965
06/21/2011	15	0	0.001	0.002	0	0	0	0	0	0.005	0	0.007	302.332	0.696	-0.391385
06/21/2011	16	0	0.002	0.002	0	0	0	0	0	0.004	0	0.007	301.64	0.711	-0.496509
06/21/2011	17	0	0.003	0.002	0	0	0	0	0	0.003	0	0.008	301.03	0.723	-0.589198
06/21/2011	18	0	0.005	0.002	0	0	0	0	0	0.004	0	0.01	300.423	0.733	-0.567003
06/21/2011	19	0	0.009	0.002	0	0	0	0	0	0.006	0	0.012	299.672	0.744	-0.506537
06/21/2011	20	0	0.011	0.002	0	0	0	0	0	0.011	0	0.014	298.564	0.782	-0.252771
06/21/2011	21	0.001	0.011	0.001	0	0	0	0.001	0	0.018	0	0.016	297.974	0.806	-0.023808
06/21/2011	22	0.001	0.011	0.002	0	0	0	0.001	0	0.022	0	0.016	297.528	0.824	-0.0592629
06/21/2011	23	0.002	0.011	0.001	0	0.001	0	0.001	0	0.023	0	0.016	296.959	0.852	0.0352513
06/21/2011	24	0.002	0.008	0.001	0	0.001	0	0.001	0	0.02	0	0.015	296.313	0.888	0.151998
06/22/2011	1	0.001	0.008	0.001	0	0.001	0	0.001	0	0.019	0	0.014	295.87	0.913	0.224868
06/22/2011	2	0.001	0.009	0.001	0	0.002	0	0.001	0	0.017	0	0.014	295.424	0.935	0.389962
06/22/2011	3	0.001	0.011	0.002	0	0.002	0	0.001	0	0.016	0	0.013	295.433	0.937	0.388592
06/22/2011	4	0.001	0.013	0.002	0	0.003	0	0.001	0	0.015	0	0.014	295.424	0.938	0.379908
06/22/2011	5	0.001	0.016	0.003	0	0.003	0	0.001	0	0.014	0	0.018	295.36	0.938	0.250402
06/22/2011	6	0	0.013	0.004	0	0.003	0	0.001	0.001	0.014	0	0.02	295.269	0.937	0.195552
06/22/2011	7	0	0.011	0.004	0	0.003	0	0.001	0.001	0.013	0	0.022	295.294	0.933	0.0720763
06/22/2011	8	0	0.011	0.006	0.001	0.002	0	0.001	0.001	0.013	0	0.024	295.79	0.917	-0.0331855
06/22/2011	9	0	0.015	0.01	0.001	0.002	0	0.001	0.001	0.012	0	0.027	297.679	0.875	-0.220914
06/22/2011	10	0	0.027	0.014	0	0.001	0	0	0.001	0.008	0	0.024	299.958	0.805	-0.456672
06/22/2011	11	0	0.018	0.011	0	0.001	0	0	0	0.004	0	0.013	299.386	0.812	-0.461132
06/22/2011	12	0	0.006	0.006	0	0	0	0	0	0.004	0	0.011	300.792	0.801	-0.482228
06/22/2011	13	0	0.002	0.004	0	0	0	0	0	0.003	0	0.009	301.573	0.782	-0.524605
06/22/2011	14	0	0.001	0.003	0	0	0	0	0	0.002	0	0.008	301.705	0.782	-0.555751
06/22/2011	15	0	0	0.002	0	0	0	0	0	0.002	0	0.006	301.087	0.8	-0.494158
06/22/2011	16	0	0	0.002	0	0	0	0	0	0.002	0	0.005	300.235	0.82	-0.433154
06/22/2011	17	0	0	0.002	0	0	0	0	0	0.002	0	0.004	299.227	0.85	-0.328931
06/22/2011	18	0	0	0.002	0	0	0	0	0	0.003	0	0.004	298.659	0.882	-0.112151
06/22/2011	19	0.001	0	0.002	0	0	0	0	0	0.006	0	0.005	298.07	0.899	0.370597
06/22/2011	20	0.002	0.001	0.002	0	0.001	0	0	0	0.009	0	0.006	297.343	0.916	0.14737
06/22/2011	21	0.003	0.002	0.002	0	0.001	0	0	0	0.01	0	0.006	297.005	0.925	0.943209
06/22/2011	22	0.004	0.003	0.002	0	0.001	0	0.001	0	0.01	0	0.007	296.866	0.935	0.813669
06/22/2011	23	0.004	0.003	0.002	0	0.002	0	0.001	0	0.01	0	0.007	296.949	0.926	0.904261
06/22/2011	24	0.003	0.003	0.002	0	0.002	0	0.001	0	0.011	0	0.007	296.972	0.936	0.983998
06/23/2011	1	0.001	0.003	0.001	0	0.001	0	0.001	0	0.012	0	0.008	296.847	0.964	0.514556
06/23/2011	2	0.001	0.002	0.001	0	0.001	0	0.001	0	0.012	0	0.007	296.915	0.967	1.47983
06/23/2011	3	0.002	0.001	0.001	0	0.001	0	0.001	0	0.012	0	0.007	297.002	0.962	1.34902
06/23/2011	4	0.003	0.001	0.001	0	0.001	0	0	0	0.012	0	0.007	297.05	0.965	1.38582
06/23/2011	5	0.003	0.001	0.001	0	0.001	0	0	0	0.013	0	0.008	297.085	0.968	1.29744
06/23/2011	6	0.003	0.003	0.001	0	0.002	0	0.001	0	0.014	0	0.008	297.178	0.968	1.54731
06/23/2011	7	0.003	0.006	0.001	0	0.003	0	0.001	0	0.015	0	0.009	298.169	0.928	1.17094
06/23/2011	8	0.001	0.02	0.005	0	0.002	0	0	0	0.011	0	0.009	299.124	0.882	0.0157969
06/23/2011	9	0	0.014	0.006	0	0.001	0	0	0	0.004	0	0.007	299.477	0.859	-0.209301
06/23/2011	10	0	0.002	0.005	0	0	0	0	0	0.004	0	0.008	300.365	0.835	-0.346459
06/23/2011	11	0	0	0.004	0	0	0	0	0	0.004	0	0.009	301.013	0.8	-0.445032
06/23/2011	12	0	0	0.003	0	0	0	0	0	0.005	0	0.009	301.976	0.754	-0.45506
06/23/2011	13	0	0	0.003	0	0	0	0	0	0.005	0	0.008	302.37	0.718	-0.444891
06/23/2011	14	0	0	0.003	0	0	0	0	0	0.006	0	0.007	302.442	0.705	-0.203533
06/23/2011	15	0.001	0	0.003	0	0	0	0	0	0.007	0	0.007	302.394	0.693	0.193165
06/23/2011	16	0.001	0	0.004	0	0	0	0	0	0.008	0	0.008	302.349	0.683	0.20119
06/23/2011	17	0.001	0.001	0.004	0	0	0	0	0	0.01	0	0.009	301.748	0.701	0.145532
06/23/2011	18	0.001	0.002	0.004	0.001	0	0	0	0	0.013	0	0.012	301.195	0.715	-0.096465
06/23/2011	19	0.002	0.002	0.002	0.001	0	0	0.001	0.001	0.021	0	0.014	301.145	0.755	-0.243367
06/23/2011	20	0.003	0.004	0.002	0.001	0.001	0	0.001	0.001	0.028	0	0.016	299.211	0.773	1.79623
06/23/2011	21	0.005	0.005	0.002	0.002	0.001	0	0.001	0.001	0.033	0	0.018	298.322	0.76	1.70844
06/23/2011	22	0.005	0.007	0.002	0.002	0.001	0	0.001	0.001	0.035	0	0.019	297.626	0.779	1.7202
06/23/2011	23	0.005	0.007	0.002	0.002	0.001	0	0.001	0.001	0.035	0	0.02	296.934	0.817	1.74712
06/23/2011	24	0.004	0.006	0.002	0.002	0.002	0	0.001	0.001	0.033	0	0.019	296.341	0.869	1.81902
06/24/2011	1	0.004	0.004	0.001	0.002	0.003	0	0.001	0.001	0.032	0	0.019	295.864	0.905	1.9983
06/24/2011	2	0.004	0.003	0.001	0.001	0.003	0	0.001	0.001	0.029	0	0.018	295.544	0.933	2.11315
06/24/2011	3	0.004	0.003	0.001	0.001	0.004	0	0.001	0.001	0.026	0	0.017	295.386	0.946	2.17567
06/24/2011	4	0.004	0.003	0.001	0.001	0.005	0	0.001	0.002	0.024	0	0.017	295.25	0.953	2.16818
06/24/2011	5	0.004	0.003	0.001	0.001	0.006	0	0.001	0.002	0.023	0	0.017	295.117	0.955	2.19551
06/24/2011	6	0.006	0.004	0.001	0.001	0.006	0	0.001	0.002	0.021	0	0.017	294.973	0.954	2.15778
06/24/2011	7	0.008	0.005	0.002	0.001	0.006	0	0.001	0.002	0.02	0	0.017	295.799	0.954	2.07058
06/24/2011	8	0.006	0.013	0.007	0.002	0.006	0	0.001	0.003	0.022	0.001	0.017	297.991	0.872	1.62044
06/24/2011	9	0.002	0.024	0.014	0.001	0.004	0	0.001	0.002	0.021	0.001	0.018	299.695	0.809	-0.0655445
06/24/2011	10	0.001	0.031	0.019	0	0.002	0	0.001	0.001	0.016	0	0.02	301.456	0.734	-0.019677
06/24/2011	11	0	0.03	0.019	0	0.001	0	0.001	0.001	0.015	0	0.02	303.256	0.664	-0.193341
06/24/2011	12	0	0.028	0.018	0	0.001	0	0.001	0.001	0.015	0	0.019	304.926	0.583	-0.0999596
06/24/2011	13	0	0.026	0.017	0	0.001	0	0.001	0.001	0.016	0	0.018	306.402	0.541	0.110616
06/24/2011	14	0	0.013	0.012	0	0.001	0	0.001	0.001	0.015	0	0.019	304.422	0.609	-0.100763
06/24/2011	15	0	0.004	0.007	0.001	0	0	0.001	0.001	0.015	0	0.017	303.428	0.625	0.00234301
06/24/2011	16	0.001	0.003	0.005	0.001	0	0	0.001	0.001	0.016	0	0.016	302.851	0.635	-0.046143
06/24/2011	17	0.001	0.002	0.004	0.001	0	0	0.001	0.001	0.018	0	0.016	302.587	0.653	-0.176621
06/24/2011	18	0.002	0.002	0.003	0.002	0	0	0.001	0.001	0.022	0	0.017	301.598	0.672	-0.359688
06/24/2011	19	0.003	0.002	0.004	0.002	0.001	0	0.001	0.001	0.028	0	0.019	300.484	0.653	-0.355931
06/24/2011	20	0.004	0.003	0.004	0.002	0.001	0	0.001	0.001	0.03	0	0.019	298.465	0.696	-0.175336
06/24/2011	21	0.006	0.003	0.003	0.003	0.001	0	0.001	0.002	0.029	0	0.018	297.871	0.64	1.4804
06/24/2011	22	0.01	0.003	0.003	0.003	0.001	0	0.002	0.002	0.026	0	0.017	297.199	0.675	1.5234
06/24/2011	23	0.013	0.004	0.004	0.003	0.001	0	0.002	0.002	0.024	0	0.016	296.854	0.7	1.46689
06/24/2011	24	0.015	0.005	0.006	0.003	0.001	0.001	0.002	0.002	0.023	0.001	0.016	296.369	0.746	1.45999
06/25/2011	1	0.018	0.008	0.008	0.002	0.001	0.001	0.002	0.003	0.021	0.001	0.016	295.794	0.815	1.49004
06/25/2011	2	0.02	0.015	0.009	0.002	0.002	0.001	0.003	0.004	0.017	0.001	0.016	295.355	0.865	1.67594
06/25/2011	3	0.021	0.023	0.01	0.001	0.002	0.001	0.003	0.006	0.014	0.001	0.016	295.109	0.884	1.81963
06/25/2011	4	0.023	0.028	0.01	0.001	0.002	0.001	0.003	0.007	0.013	0.002	0.016	294.945	0.894	1.96181
06/25/2011	5	0.025	0.03	0.01	0.001	0.002	0.001	0.004	0.007	0.013	0.002	0.016	294.811	0.903	2.12089
06/25/2011	6	0.024	0.025	0.008	0.002	0.002	0.001	0.003	0.006	0.015	0.002	0.016	294.748	0.914	2.0488
06/25/2011	7	0.022	0.016	0.007	0.001	0.002	0.001	0.003	0.005	0.017	0.001	0.016	295.775	0.914	1.94848
06/25/2011	8	0.012	0.011	0.01	0.001	0.002	0.001	0.002	0.004	0.019	0.001	0.016	297.705	0.857	1.60737
06/25/2011	9	0.008	0.023	0.023	0	0.002	0.001	0.002	0.003	0.017	0.001	0.014	299.52	0.784	-0.646439
06/25/2011	10	0.008	0.025	0.025	0	0.002	0	0.001	0.002	0.016	0.001	0.012	301.422	0.707	-1.01228
06/25/2011	11	0.007	0.026	0.023	0	0.001	0	0.001	0.002	0.016	0.001	0.011	303.178	0.638	-1.11923
06/25/2011	12	0.006	0.031	0.023	0	0.001	0	0.001	0.002	0.019	0	0.012	304.7	0.579	-1.1392
06/25/2011	13	0.005	0.031	0.023	0	0.001	0	0.001	0.002	0.021	0	0.013	306.31	0.528	-1.21702
06/25/2011	14	0.002	0.011	0.022	0	0.001	0	0.001	0.002	0.022	0	0.018	305.438	0.549	-0.548713
06/25/2011	15	0.002	0.001	0.014	0	0	0	0.001	0.002	0.019	0.001	0.016	304.821	0.575	-0.508817
06/25/2011	16	0.002	0	0.009	0	0	0	0.001	0.002	0.015	0.001	0.012	304.017	0.589	-0.59238
06/25/2011	17	0.004	0.001	0.01	0	0	0	0.001	0.002	0.015	0.001	0.011	303.788	0.591	-0.528086
06/25/2011	18	0.007	0.002	0.011	0	0.001	0	0.001	0.002	0.016	0.001	0.012	303.275	0.6	-0.73487
06/25/2011	19	0.01	0.003	0.01	0.001	0.001	0	0.001	0.003	0.016	0.001	0.013	302.268	0.645	1.455
06/25/2011	20	0.014	0.004	0.007	0.001	0.001	0.001	0.002	0.004	0.015	0.001	0.013	300.586	0.688	1.64882
06/25/2011	21	0.019	0.005	0.006	0.001	0.002	0.001	0.002	0.005	0.014	0.001	0.014	299.453	0.709	1.63681
06/25/2011	22	0.021	0.008	0.007	0.002	0.002	0.001	0.003	0.005	0.014	0.001	0.015	298.653	0.743	1.58562
06/25/2011	23	0.019	0.011	0.008	0.002	0.002	0.001	0.003	0.005	0.014	0.001	0.016	298.101	0.781	1.58454
06/25/2011	24	0.012	0.01	0.007	0.002	0.002	0.001	0.003	0.005	0.016	0.001	0.016	297.678	0.844	1.66753
06/26/2011	1	0.007	0.005	0.004	0.002	0.002	0.001	0.003	0.003	0.018	0.001	0.015	297.305	0.893	1.8199
06/26/2011	2	0.004	0.002	0.002	0.001	0.002	0	0.002	0.002	0.018	0	0.014	297.067	0.921	2.03602
06/26/2011	3	0.003	0.001	0.001	0.001	0.002	0	0.001	0.001	0.018	0	0.013	296.989	0.923	0.305161
06/26/2011	4	0.002	0.001	0.001	0.001	0.001	0	0.001	0.001	0.016	0	0.012	296.949	0.919	0.259835
06/26/2011	5	0.002	0.001	0.001	0.001	0.002	0	0.001	0.001	0.016	0	0.012	296.894	0.915	0.282273
06/26/2011	6	0.002	0.003	0.001	0.001	0.002	0	0.001	0.001	0.017	0	0.012	296.897	0.905	0.244284
06/26/2011	7	0.003	0.007	0.002	0.001	0.002	0	0.001	0.001	0.02	0	0.012	297.93	0.899	1.98972
06/26/2011	8	0.004	0.023	0.005	0.002	0.003	0	0.001	0.001	0.02	0	0.013	300.291	0.821	1.72033
06/26/2011	9	0.001	0.092	0.023	0.001	0.003	0	0.001	0.002	0.014	0.001	0.015	301.905	0.754	-0.18012
06/26/2011	10	0	0.078	0.029	0	0.001	0	0.001	0.001	0.01	0	0.016	303.643	0.672	-0.331751
06/26/2011	11	0	0.044	0.023	0	0.001	0	0.001	0.001	0.011	0	0.018	305.266	0.592	-0.44829
06/26/2011	12	0	0.012	0.014	0	0	0	0.001	0.001	0.01	0	0.015	304.71	0.598	-0.414518
06/26/2011	13	0	0.002	0.006	0	0	0	0	0.001	0.011	0	0.013	305.521	0.557	-0.219007
06/26/2011	14	0.001	0.001	0.004	0	0	0	0	0.001	0.012	0	0.011	305.729	0.556	-0.278159
06/26/2011	15	0.001	0	0.003	0	0	0	0	0.001	0.011	0	0.01	305.123	0.58	-0.327623
06/26/2011	16	0.001	0	0.003	0	0	0	0	0	0.01	0	0.008	304.191	0.611	0.0674466
06/26/2011	17	0.001	0	0.002	0	0	0	0	0	0.008	0	0.007	302.021	0.685	0.111165
06/26/2011	18	0.002	0.001	0.002	0	0	0	0	0	0.008	0	0.006	300.496	0.781	0.173955
06/26/2011	19	0.002	0.004	0.002	0.001	0	0	0.001	0.001	0.01	0	0.007	299.315	0.845	-0.099925
06/26/2011	20	0.002	0.011	0.002	0.001	0.001	0	0.001	0.001	0.013	0	0.011	297.994	0.86	-0.00823431
06/26/2011	21	0.001	0.011	0.002	0.001	0.001	0	0.001	0.001	0.016	0	0.014	297.286	0.877	0.0895871
06/26/2011	22	0.002	0.008	0.002	0.001	0.001	0	0.001	0.001	0.018	0	0.015	297.064	0.874	0.0692643
06/26/2011	23	0.002	0.005	0.002	0.001	0.002	0	0.001	0.001	0.019	0	0.014	297.051	0.873	0.0990585
06/26/2011	24	0.003	0.004	0.002	0.002	0.002	0	0.002	0.002	0.018	0	0.014	297.081	0.852	0.0886352
06/27/2011	1	0.006	0.003	0.002	0.002	0.002	0.001	0.002	0.003	0.015	0	0.013	297.307	0.827	1.88207
06/27/2011	2	0.007	0.003	0.002	0.003	0.003	0.001	0.003	0.004	0.009	0	0.013	297.462	0.81	1.8785
06/27/2011	3	0.005	0.002	0.002	0.004	0.003	0.001	0.003	0.006	0.007	0	0.013	297.458	0.825	0.117678
06/27/2011	4	0.004	0.002	0.001	0.005	0.003	0.001	0.003	0.006	0.008	0	0.013	297.447	0.828	0.117937
06/27/2011	5	0.003	0.006	0.001	0.005	0.004	0.001	0.003	0.005	0.01	0	0.013	297.357	0.844	1.93556
06/27/2011	6	0.003	0.01	0.002	0.004	0.004	0.001	0.002	0.004	0.013	0.001	0.014	297.234	0.853	0.164207
06/27/2011	7	0.004	0.013	0.003	0.003	0.004	0.001	0.002	0.003	0.014	0.001	0.013	297.945	0.867	1.81727
06/27/2011	8	0.003	0.023	0.007	0.003	0.003	0.001	0.002	0.002	0.014	0.001	0.013	299.979	0.803	-0.0381811
06/27/2011	9	0.002	0.056	0.019	0.001	0.002	0	0.001	0.002	0.012	0.001	0.012	301.608	0.747	-0.279161
06/27/2011	10	0.001	0.071	0.03	0.001	0.002	0	0.001	0.001	0.012	0.001	0.013	303.185	0.686	-0.174681
06/27/2011	11	0	0.07	0.036	0	0.001	0	0.001	0.001	0.012	0.001	0.015	304.738	0.628	0.0183781
06/27/2011	12	0	0.049	0.031	0	0.001	0	0.001	0.001	0.012	0.001	0.016	306.187	0.576	-0.143064
06/27/2011	13	0	0.024	0.021	0	0.001	0	0	0.001	0.011	0	0.016	306.447	0.559	-0.438901
06/27/2011	14	0	0.004	0.009	0	0	0	0	0	0.009	0	0.012	305.928	0.569	-0.481005
06/27/2011	15	0.001	0.001	0.004	0	0	0	0	0	0.01	0	0.009	306.608	0.544	0.451227
06/27/2011	16	0.002	0	0.003	0	0	0	0	0	0.012	0	0.009	307.03	0.504	-0.171444
06/27/2011	17	0.003	0	0.002	0	0	0	0	0	0.013	0	0.008	305.105	0.542	-0.406195
06/27/2011	18	0.002	0	0.001	0	0	0	0	0	0.013	0	0.007	304.037	0.595	-0.364161
06/27/2011	19	0.005	0	0.001	0	0	0	0	0	0.012	0	0.006	302.75	0.606	-0.0120105
06/27/2011	20	0.006	0	0.001	0.001	0	0	0.001	0	0.01	0	0.006	300.909	0.702	1.94737
06/27/2011	21	0.006	0	0.001	0.001	0.001	0	0.001	0	0.01	0	0.006	300.534	0.659	1.88919
06/27/2011	22	0.005	0	0.001	0.002	0.001	0	0.001	0	0.008	0	0.005	299.889	0.723	1.88996
06/27/2011	23	0.002	0	0	0.001	0.001	0	0	0	0.006	0	0.004	298.536	0.862	0.329895
06/27/2011	24	0.001	0	0	0.001	0	0	0	0	0.004	0	0.004	298.268	0.885	-0.0586295
06/28/2011	1	0.001	0	0.001	0	0	0	0	0	0.005	0	0.004	298.053	0.909	0.479463
06/28/2011	2	0.001	0.003	0.002	0.001	0.001	0	0	0	0.007	0	0.007	297.968	0.911	0.0955966
06/28/2011	3	0.001	0.013	0.005	0.001	0.001	0	0	0.001	0.009	0	0.011	298.385	0.843	-0.0534105
06/28/2011	4	0.001	0.02	0.006	0.001	0.002	0	0.001	0.001	0.011	0	0.013	297.939	0.867	0.0599227
06/28/2011	5	0.001	0.018	0.005	0.001	0.002	0	0.001	0.001	0.012	0	0.013	297.693	0.892	0.116895
06/28/2011	6	0.002	0.014	0.004	0.001	0.003	0	0.001	0.001	0.014	0	0.012	297.674	0.9	0.177525
06/28/2011	7	0.002	0.015	0.004	0.001	0.004	0	0.001	0.001	0.015	0	0.011	298.534	0.901	1.85747
06/28/2011	8	0.002	0.033	0.01	0.001	0.004	0	0.001	0.001	0.014	0	0.01	299.666	0.865	1.65629
06/28/2011	9	0.001	0.062	0.023	0.001	0.003	0	0.001	0.001	0.01	0	0.01	300.457	0.825	-0.0996096
06/28/2011	10	0	0.046	0.029	0	0.001	0	0	0	0.009	0	0.013	300.926	0.794	-0.267578
06/28/2011	11	0	0.029	0.026	0	0.001	0	0	0	0.009	0	0.015	300.651	0.77	-0.367381
06/28/2011	12	0	0.016	0.021	0	0	0	0	0	0.01	0	0.016	300.207	0.76	-0.400747
06/28/2011	13	0	0.009	0.017	0	0	0	0	0	0.01	0	0.017	300.369	0.744	-0.451597
06/28/2011	14	0	0.006	0.015	0	0	0	0	0	0.01	0	0.02	300.462	0.741	-0.504552
06/28/2011	15	0	0.009	0.02	0	0	0	0	0	0.01	0	0.024	300.36	0.743	-0.546625
06/28/2011	16	0	0.014	0.022	0	0	0	0	0.001	0.011	0	0.023	300.13	0.76	-0.482509
06/28/2011	17	0	0.016	0.021	0	0	0	0	0.001	0.012	0	0.023	299.536	0.783	-0.431344
06/28/2011	18	0	0.012	0.018	0	0	0	0.001	0.001	0.014	0	0.024	298.793	0.802	-0.334278
06/28/2011	19	0	0.009	0.016	0	0	0	0.001	0.001	0.016	0	0.025	298.013	0.826	-0.249083
06/28/2011	20	0	0.007	0.013	0	0	0	0.001	0.001	0.018	0	0.025	297.737	0.837	-0.174819
06/28/2011	21	0	0.007	0.012	0	0	0	0.001	0.001	0.02	0	0.025	297.462	0.853	-0.100363
06/28/2011	22	0.001	0.008	0.011	0	0	0	0.001	0.001	0.022	0	0.025	296.806	0.881	0.0231537
06/28/2011	23	0.001	0.008	0.011	0	0	0	0.001	0.001	0.024	0	0.024	296.332	0.898	0.129054
06/28/2011	24	0.001	0.007	0.011	0	0	0	0.001	0.001	0.026	0	0.024	295.947	0.912	0.192063
06/29/2011	1	0.001	0.006	0.01	0	0	0	0.001	0.001	0.028	0	0.022	295.613	0.926	0.332023
06/29/2011	2	0.002	0.006	0.01	0	0	0	0.001	0.001	0.029	0	0.021	295.387	0.934	0.367418
06/29/2011	3	0.003	0.005	0.009	0	0	0	0.001	0.001	0.031	0	0.019	295.276	0.933	0.411783
06/29/2011	4	0.003	0.006	0.009	0	0	0	0.001	0.001	0.033	0.001	0.018	295.205	0.931	0.421044
06/29/2011	5	0.007	0.007	0.009	0	0.001	0	0.001	0.001	0.032	0.001	0.018	295.144	0.927	0.776907
06/29/2011	6	0.009	0.012	0.01	0	0.001	0	0.002	0.001	0.03	0.001	0.018	295.054	0.924	0.727167
06/29/2011	7	0.008	0.028	0.015	0	0.001	0	0.002	0.001	0.029	0.001	0.018	295.557	0.914	0.167389
06/29/2011	8	0.004	0.08	0.037	0	0.001	0	0.003	0.001	0.034	0.001	0.021	297.105	0.861	-0.770019
06/29/2011	9	0.002	0.153	0.056	0	0.001	0	0.002	0.001	0.046	0.001	0.033	298.846	0.796	-0.0382245
06/29/2011	10	0.001	0.139	0.05	0	0.001	0	0.001	0.001	0.046	0.001	0.037	300.561	0.734	-0.0811174
06/29/2011	11	0.001	0.11	0.049	0	0.001	0	0.001	0.001	0.041	0.001	0.039	302.277	0.673	0.0654463
06/29/2011	12	0	0.07	0.045	0	0.001	0	0.001	0.001	0.033	0	0.041	303.775	0.616	-0.238939
06/29/2011	13	0	0.046	0.041	0	0.001	0	0.001	0.001	0.028	0	0.044	304.974	0.573	-0.541976
06/29/2011	14	0	0.035	0.04	0	0.001	0	0.001	0.001	0.027	0	0.049	305.631	0.548	-0.640788
06/29/2011	15	0	0.035	0.04	0	0.001	0	0.001	0.001	0.028	0	0.052	305.609	0.544	-0.66219
06/29/2011	16	0	0.038	0.037	0	0.001	0	0.001	0.001	0.031	0	0.053	305.252	0.554	-0.618293
06/29/2011	17	0	0.046	0.033	0	0.001	0	0.001	0.002	0.036	0	0.053	304.658	0.564	-0.500902
06/29/2011	18	0	0.046	0.027	0	0.001	0	0.001	0.002	0.043	0	0.053	304.015	0.579	-0.247653
06/29/2011	19	0.001	0.031	0.019	0.001	0.001	0	0.001	0.002	0.054	0	0.053	303.045	0.632	0.144708
06/29/2011	20	0.001	0.024	0.011	0.002	0.001	0	0.002	0.003	0.058	0	0.05	303.691	0.453	-0.0183094
06/29/2011	21	0.001	0.02	0.005	0.003	0.001	0	0.001	0.002	0.049	0	0.046	303.153	0.451	0.232127
06/29/2011	22	0	0.013	0.005	0.004	0.001	0	0.001	0.002	0.041	0	0.043	302.358	0.515	0.293482
06/29/2011	23	0	0.012	0.004	0.003	0.001	0	0.001	0.001	0.031	0	0.04	300.442	0.642	-0.28721
06/29/2011	24	0	0.011	0.004	0.003	0.002	0	0.001	0.001	0.028	0	0.041	299.875	0.686	-0.347274
2011-02-07	1	0.009	0.053	0.008	0.002	0.002	0.002	0.004	0.009	0.061	0.001	0.044	297.747	0.761	0.168612
2011-02-07	2	0.014	0.043	0.006	0.003	0.002	0.002	0.004	0.01	0.046	0.001	0.038	297.274	0.802	1.57437
2011-02-07	3	0.014	0.036	0.004	0.003	0.002	0.002	0.005	0.011	0.034	0.001	0.033	296.882	0.825	1.68856
2011-02-07	4	0.015	0.031	0.004	0.003	0.002	0.002	0.005	0.011	0.025	0.001	0.029	296.72	0.827	1.7076
2011-02-07	5	0.016	0.027	0.004	0.003	0.002	0.002	0.005	0.011	0.018	0.001	0.026	296.396	0.846	1.74727
2011-02-07	6	0.019	0.023	0.004	0.002	0.002	0.002	0.005	0.012	0.014	0.001	0.024	296.254	0.855	1.80998
2011-02-07	7	0.022	0.021	0.005	0.002	0.003	0.002	0.006	0.012	0.01	0.001	0.023	297.101	0.862	2.00015
2011-02-07	8	0.02	0.017	0.01	0.002	0.003	0.002	0.006	0.013	0.007	0.002	0.022	299.677	0.771	1.9415
2011-02-07	9	0.015	0.046	0.021	0.001	0.003	0.002	0.004	0.008	0.022	0.001	0.024	301.767	0.689	1.51274
2011-02-07	10	0.007	0.078	0.025	0	0.003	0.001	0.003	0.005	0.036	0.001	0.028	303.982	0.595	-0.301968
2011-02-07	11	0.001	0.141	0.024	0	0.002	0.001	0.002	0.003	0.034	0	0.033	305.986	0.512	-0.12888
2011-02-07	12	0	0.189	0.024	0	0.002	0	0.001	0.003	0.029	0	0.041	307.737	0.448	-0.469127
2011-02-07	13	0	0.217	0.028	0	0.001	0	0.001	0.002	0.027	0	0.05	309.406	0.395	-0.796822
2011-02-07	14	0	0.144	0.026	0	0.001	0	0.001	0.002	0.023	0	0.069	307.029	0.461	-0.845155
2011-02-07	15	0	0.091	0.022	0	0.001	0	0.001	0.002	0.025	0	0.083	306.756	0.46	-0.858862
2011-02-07	16	0	0.088	0.024	0	0.001	0	0.001	0.002	0.031	0	0.084	307.891	0.41	-0.88121
2011-02-07	17	0	0.076	0.024	0	0.001	0	0.001	0.002	0.035	0	0.081	306.801	0.429	-0.8371
2011-02-07	18	0	0.042	0.017	0	0.001	0	0.001	0.002	0.033	0	0.072	305.076	0.461	-0.794165
2011-02-07	19	0	0.027	0.013	0.001	0.001	0	0.001	0.002	0.034	0	0.066	304.367	0.491	-0.73066
2011-02-07	20	0	0.027	0.013	0.001	0.001	0	0.001	0.002	0.041	0	0.067	302.677	0.509	-0.640451
2011-02-07	21	0	0.03	0.015	0.001	0.001	0	0.002	0.003	0.049	0	0.066	300.979	0.545	-0.395259
2011-02-07	22	0	0.033	0.016	0.001	0.001	0.001	0.002	0.003	0.055	0	0.065	299.701	0.595	0.00750785
2011-02-07	23	0.001	0.035	0.016	0.001	0.001	0.001	0.002	0.004	0.06	0	0.062	298.791	0.647	0.114254
2011-02-07	24	0.001	0.034	0.015	0.001	0.001	0.001	0.002	0.004	0.066	0.001	0.058	298.068	0.703	-0.0714408
2011-03-07	1	0.002	0.033	0.014	0.001	0.001	0.001	0.003	0.005	0.071	0.001	0.053	297.432	0.765	-0.0331081
2011-03-07	2	0.004	0.032	0.014	0.001	0.001	0.001	0.003	0.005	0.072	0.001	0.048	297.014	0.804	0.146214
2011-03-07	3	0.005	0.031	0.014	0.001	0.001	0.001	0.003	0.005	0.072	0.001	0.045	296.778	0.821	0.254475
2011-03-07	4	0.01	0.031	0.013	0.001	0.001	0.001	0.003	0.005	0.069	0.002	0.042	296.602	0.83	1.39079
2011-03-07	5	0.015	0.031	0.013	0.001	0.001	0.001	0.003	0.006	0.064	0.002	0.04	296.462	0.837	1.40632
2011-03-07	6	0.02	0.031	0.013	0.001	0.002	0.001	0.004	0.006	0.058	0.002	0.038	296.402	0.843	1.43188
2011-03-07	7	0.024	0.031	0.013	0.001	0.002	0.001	0.004	0.007	0.052	0.002	0.037	297.318	0.849	1.48676
2011-03-07	8	0.023	0.027	0.015	0.001	0.002	0.002	0.005	0.009	0.046	0.002	0.036	299.582	0.787	1.49503
2011-03-07	9	0.039	0.104	0.038	0	0.003	0.002	0.004	0.009	0.038	0.002	0.033	301.2	0.731	0.645414
2011-03-07	10	0.036	0.149	0.041	0	0.002	0.001	0.003	0.007	0.044	0.001	0.032	303.172	0.662	0.148491
2011-03-07	11	0.013	0.175	0.043	0	0.002	0.001	0.002	0.005	0.055	0	0.038	305.552	0.563	-1.01067
2011-03-07	12	0.001	0.152	0.04	0	0.001	0	0.001	0.003	0.046	0	0.046	307.02	0.508	0.193184
2011-03-07	13	0	0.086	0.031	0	0.001	0	0.001	0.002	0.035	0	0.053	307.872	0.49	-0.596875
2011-03-07	14	0	0.022	0.017	0	0.001	0	0.001	0.001	0.027	0	0.054	306.697	0.524	-0.707906
2011-03-07	15	0	0.003	0.009	0	0	0	0	0.001	0.025	0	0.042	306.076	0.54	-0.649097
2011-03-07	16	0	0.001	0.006	0	0	0	0	0	0.023	0	0.031	306.344	0.531	-0.533778
2011-03-07	17	0	0.001	0.005	0	0	0	0	0	0.021	0	0.025	306.333	0.521	-0.390851
2011-03-07	18	0	0	0.004	0	0	0	0	0	0.018	0	0.018	305.851	0.516	0.310525
2011-03-07	19	0.001	0	0.003	0	0	0	0	0	0.016	0	0.014	304.793	0.526	0.419219
2011-03-07	20	0.001	0	0.002	0	0	0	0	0	0.014	0	0.01	303.106	0.585	-0.240018
2011-03-07	21	0.001	0	0.002	0	0	0	0	0	0.01	0	0.008	301.88	0.63	-0.0351279
2011-03-07	22	0.001	0.001	0.002	0	0	0	0	0	0.008	0	0.007	300.949	0.67	0.0678598
2011-03-07	23	0.001	0.001	0.002	0	0	0	0	0	0.007	0	0.006	300.192	0.71	0.0120778
2011-03-07	24	0.001	0.001	0.001	0	0	0	0	0	0.005	0	0.005	299.559	0.748	0.0837306
2011-04-07	1	0.001	0	0.001	0	0	0	0	0	0.005	0	0.004	299.07	0.783	0.0398152
2011-04-07	2	0.001	0	0.001	0	0	0	0	0	0.004	0	0.003	298.558	0.822	0.242406
2011-04-07	3	0.001	0	0.001	0	0	0	0	0	0.005	0	0.003	298.199	0.848	0.104678
2011-04-07	4	0.001	0	0.001	0	0	0	0	0	0.005	0	0.003	298.222	0.817	0.00405859
2011-04-07	5	0.001	0	0	0	0	0	0	0	0.005	0	0.004	297.855	0.847	-0.288075
2011-04-07	6	0.001	0	0	0	0	0	0	0	0.005	0	0.004	297.572	0.881	-0.186334
2011-04-07	7	0.001	0	0.001	0	0	0	0	0	0.005	0	0.006	298.208	0.875	0.069886
2011-04-07	8	0.001	0	0.001	0	0	0	0	0	0.007	0	0.008	299.94	0.82	0.0125816
2011-04-07	9	0	0.002	0.003	0	0	0	0	0	0.009	0	0.012	301.235	0.762	-0.292401
2011-04-07	10	0	0.003	0.006	0	0	0	0	0	0.011	0	0.014	302.854	0.688	-0.319819
2011-04-07	11	0	0.003	0.007	0	0	0	0	0	0.013	0	0.015	304.683	0.617	-0.241422
2011-04-07	12	0	0.003	0.008	0	0	0	0	0	0.01	0	0.013	305.856	0.572	-0.455902
2011-04-07	13	0	0.001	0.004	0	0	0	0	0	0.008	0	0.01	305.208	0.58	-0.40125
2011-04-07	14	0.002	0	0.002	0	0	0	0	0	0.01	0	0.007	305.522	0.57	-0.137665
2011-04-07	15	0.002	0	0.002	0	0	0	0	0	0.013	0	0.007	305.881	0.552	-0.4786
2011-04-07	16	0.001	0	0.001	0	0	0	0	0	0.011	0	0.006	304.313	0.617	1.64336
2011-04-07	17	0.001	0	0.001	0	0	0	0	0	0.007	0	0.005	303.184	0.659	-0.0997053
2011-04-07	18	0.001	0	0.001	0	0	0	0	0	0.006	0	0.005	302.268	0.704	0.0292059
2011-04-07	19	0.002	0	0	0	0	0	0	0	0	0	0	301.078	0.768	0
2011-04-07	20	0.003	0	0	0	0	0	0	0	0	0	0	299.754	0.823	0
2011-04-07	21	0.005	0	0	0	0	0	0	0	0	0	0	298.859	0.858	0
2011-04-07	22	0.005	0	0	0	0	0	0	0	0	0	0	298.228	0.879	0
2011-04-07	23	0.006	0	0	0	0	0	0	0	0	0	0	297.758	0.895	0
2011-04-07	24	0.007	0	0.001	0	0	0	0	0	0	0	0	297.44	0.907	1.02221
2011-05-07	1	0.009	0	0.001	0	0	0	0	0	0	0	0	297.213	0.914	1.13744
2011-05-07	2	0.01	0	0.001	0	0	0	0	0	0	0	0	297.028	0.918	1.19042
2011-05-07	3	0.01	0.001	0.001	0	0	0	0	0	0	0	0	296.871	0.921	1.19806
2011-05-07	4	0.009	0.001	0.001	0	0	0	0	0	0	0	0	296.712	0.926	1.16152
2011-05-07	5	0.008	0.001	0.001	0	0	0	0.001	0	0.001	0	0.001	296.554	0.925	1.69963
2011-05-07	6	0.008	0.001	0.001	0	0	0	0.001	0	0.003	0	0.002	296.377	0.931	1.54882
2011-05-07	7	0.007	0.001	0.002	0	0.001	0	0.001	0	0.007	0	0.005	296.972	0.92	1.18161
2011-05-07	8	0.008	0.006	0.003	0	0.002	0	0.001	0.001	0.015	0	0.01	298.303	0.888	1.05581
2011-05-07	9	0.004	0.026	0.009	0	0.002	0	0.001	0.002	0.024	0	0.017	299.734	0.836	0.0121262
2011-05-07	10	0.001	0.046	0.014	0	0.001	0	0.001	0.001	0.021	0	0.022	300.878	0.787	-0.000685385
2011-05-07	11	0	0.019	0.011	0	0	0	0	0.001	0.016	0	0.02	301.968	0.745	-0.230287
2011-05-07	12	0	0.007	0.009	0	0	0	0	0	0.013	0	0.017	303.2	0.691	-0.344514
2011-05-07	13	0	0.004	0.007	0	0	0	0	0	0.012	0	0.014	304.672	0.617	-0.261306
2011-05-07	14	0	0.002	0.006	0	0	0	0	0	0.011	0	0.012	304.961	0.599	-0.126236
2011-05-07	15	0	0.002	0.004	0	0	0	0	0	0.009	0	0.011	304.35	0.619	-0.333824
2011-05-07	16	0	0.003	0.004	0	0	0	0	0	0.009	0	0.013	303.542	0.65	-0.463716
2011-05-07	17	0	0.004	0.003	0	0	0	0	0	0.009	0	0.015	302.323	0.697	-0.487259
2011-05-07	18	0	0.004	0.003	0	0	0	0	0	0.01	0	0.016	301.165	0.747	-0.410664
2011-05-07	19	0	0.003	0.002	0	0	0	0	0	0.01	0	0.016	300.147	0.795	-0.343522
2011-05-07	20	0	0.003	0.002	0	0	0	0	0	0.01	0	0.016	299.046	0.828	-0.297412
2011-05-07	21	0	0.003	0.002	0	0	0	0	0	0.013	0	0.016	298.273	0.855	-0.1118
2011-05-07	22	0.001	0.002	0.002	0	0	0	0	0	0.016	0	0.015	297.691	0.875	0.157985
2011-05-07	23	0.001	0.002	0.002	0	0	0	0.001	0	0.018	0	0.014	297.248	0.888	0.122448
2011-05-07	24	0.002	0.002	0.002	0	0	0	0.001	0	0.021	0	0.014	296.907	0.895	0.18228
2011-06-07	1	0.002	0.002	0.002	0	0	0	0.001	0	0.024	0	0.013	296.62	0.901	0.78155
2011-06-07	2	0.004	0.002	0.003	0	0	0	0.001	0	0.023	0	0.013	296.384	0.907	0.631974
2011-06-07	3	0.006	0.003	0.003	0	0	0	0.001	0	0.023	0	0.012	296.234	0.91	1.02063
2011-06-07	4	0.007	0.003	0.003	0	0	0	0.001	0	0.023	0	0.012	296.127	0.911	1.10504
2011-06-07	5	0.008	0.004	0.003	0	0	0	0.001	0	0.023	0	0.012	296.04	0.913	1.18005
2011-06-07	6	0.008	0.005	0.003	0	0.001	0	0.001	0	0.023	0	0.012	295.978	0.918	1.32213
2011-06-07	7	0.009	0.005	0.003	0	0.001	0	0.001	0	0.023	0	0.012	296.672	0.918	1.3557
2011-06-07	8	0.002	0.015	0.005	0	0.001	0	0.001	0	0.021	0	0.014	297.802	0.855	0.0464053
2011-06-07	9	0	0.059	0.012	0	0.001	0	0	0	0.015	0	0.019	299.273	0.796	-0.194745
2011-06-07	10	0	0.069	0.014	0	0.001	0	0	0.001	0.015	0	0.02	300.738	0.741	-0.24138
2011-06-07	11	0	0.084	0.015	0	0.001	0	0	0.001	0.015	0	0.021	302.265	0.68	-0.331893
2011-06-07	12	0	0.093	0.015	0	0.001	0	0	0.001	0.015	0	0.021	303.759	0.616	-0.380514
2011-06-07	13	0	0.1	0.015	0	0.001	0	0	0.001	0.014	0	0.02	305.082	0.562	-0.450641
2011-06-07	14	0	0.095	0.014	0	0	0	0	0	0.015	0	0.02	305.732	0.539	-0.513567
2011-06-07	15	0	0.092	0.015	0	0	0	0	0	0.017	0	0.02	305.672	0.538	-0.349046
2011-06-07	16	0	0.087	0.015	0	0	0	0	0	0.019	0	0.021	305.372	0.543	-0.203512
2011-06-07	17	0	0.079	0.015	0	0	0	0	0.001	0.02	0	0.021	304.791	0.554	0.0733346
2011-06-07	18	0.001	0.069	0.013	0	0	0	0	0.001	0.022	0	0.021	304.157	0.562	0.0427683
2011-06-07	19	0.001	0.058	0.012	0	0	0	0.001	0.001	0.025	0	0.021	303.327	0.57	-0.190074
2011-06-07	20	0.002	0.045	0.01	0	0	0	0.001	0.001	0.029	0	0.022	301.459	0.642	-0.374912
2011-06-07	21	0.003	0.035	0.009	0	0.001	0	0.001	0.002	0.033	0	0.023	300.375	0.667	-0.309301
2011-06-07	22	0.005	0.032	0.009	0.001	0.001	0.001	0.002	0.003	0.037	0	0.024	299.581	0.698	1.47508
2011-06-07	23	0.007	0.032	0.011	0.001	0.001	0.001	0.003	0.004	0.038	0	0.025	298.937	0.734	1.41407
2011-06-07	24	0.009	0.035	0.014	0.001	0.002	0.001	0.003	0.005	0.037	0.001	0.027	298.34	0.779	1.40312
2011-07-07	1	0.01	0.04	0.019	0.001	0.002	0.001	0.004	0.006	0.037	0.001	0.028	297.818	0.825	1.41647
2011-07-07	2	0.006	0.045	0.024	0.001	0.003	0.001	0.005	0.008	0.038	0.001	0.03	297.466	0.855	1.4189
2011-07-07	3	0.005	0.049	0.026	0.001	0.003	0.001	0.005	0.009	0.038	0.001	0.031	297.289	0.865	0.3515
2011-07-07	4	0.005	0.051	0.025	0.001	0.003	0.002	0.005	0.01	0.037	0.001	0.031	297.202	0.87	1.44953
2011-07-07	5	0.005	0.053	0.021	0.001	0.003	0.002	0.005	0.01	0.034	0.001	0.03	297.089	0.88	0.402224
2011-07-07	6	0.005	0.054	0.018	0.001	0.003	0.002	0.005	0.011	0.03	0.001	0.029	297.051	0.89	0.428833
2011-07-07	7	0.006	0.054	0.019	0.001	0.004	0.002	0.005	0.011	0.026	0.001	0.027	297.993	0.89	1.59525
2011-07-07	8	0.01	0.062	0.028	0.001	0.004	0.002	0.005	0.011	0.017	0.001	0.024	300.734	0.807	1.5711
2011-07-07	9	0.007	0.271	0.054	0	0.003	0.001	0.003	0.006	0.018	0.001	0.022	302.254	0.734	-0.196901
2011-07-07	10	0	0.393	0.056	0	0.001	0	0.001	0.002	0.017	0	0.031	303.76	0.652	-0.498179
2011-07-07	11	0	0.233	0.04	0	0.001	0	0.001	0.001	0.014	0	0.03	304.951	0.598	-0.624538
2011-07-07	12	0	0.148	0.031	0	0	0	0.001	0.001	0.013	0	0.033	305.913	0.55	-0.734879
2011-07-07	13	0	0.109	0.027	0	0	0	0	0.001	0.013	0	0.033	306.85	0.506	-0.787877
2011-07-07	14	0	0.073	0.022	0	0	0	0	0.001	0.013	0	0.031	307.7	0.482	-0.804662
2011-07-07	15	0	0.041	0.017	0	0	0	0	0.001	0.012	0	0.026	307.28	0.483	-0.784763
2011-07-07	16	0	0.021	0.013	0	0	0	0	0	0.011	0	0.021	306.831	0.494	-0.751394
2011-07-07	17	0	0.012	0.011	0	0	0	0	0	0.01	0	0.016	306.042	0.512	-0.667155
2011-07-07	18	0	0.009	0.009	0	0	0	0	0	0.011	0	0.014	305.12	0.532	-0.476445
2011-07-07	19	0	0.008	0.007	0	0	0	0	0.001	0.013	0	0.013	303.941	0.56	0.026554
2011-07-07	20	0.001	0.007	0.006	0	0	0	0.001	0.001	0.015	0	0.013	302.165	0.619	-0.311677
2011-07-07	21	0.002	0.008	0.007	0	0	0	0.001	0.001	0.017	0	0.014	300.873	0.636	-0.430682
2011-07-07	22	0.003	0.013	0.009	0	0.001	0	0.001	0.001	0.018	0	0.014	299.917	0.655	-0.39885
2011-07-07	23	0.003	0.018	0.011	0	0.001	0	0.002	0.002	0.019	0	0.014	299.128	0.69	-0.266904
2011-07-07	24	0.003	0.022	0.013	0	0.001	0	0.002	0.002	0.02	0	0.014	298.392	0.742	-0.707863
2011-08-07	1	0.003	0.024	0.014	0	0.001	0	0.002	0.002	0.022	0	0.014	297.716	0.802	-0.470235
2011-08-07	2	0.004	0.024	0.015	0	0.001	0.001	0.002	0.002	0.022	0	0.015	297.252	0.843	-0.266943
2011-08-07	3	0.006	0.023	0.015	0	0.001	0.001	0.002	0.003	0.021	0	0.015	297.003	0.86	0.0207966
2011-08-07	4	0.006	0.019	0.014	0	0.001	0.001	0.002	0.003	0.021	0	0.015	296.829	0.869	0.130696
2011-08-07	5	0.006	0.015	0.011	0	0.001	0.001	0.002	0.003	0.021	0	0.015	296.693	0.875	0.436967
2011-08-07	6	0.007	0.011	0.008	0	0.001	0.001	0.002	0.003	0.021	0	0.015	296.662	0.881	0.852317
2011-08-07	7	0.008	0.008	0.006	0	0.001	0.001	0.002	0.003	0.021	0	0.015	297.572	0.888	1.11397
2011-08-07	8	0.006	0.006	0.005	0	0.001	0.001	0.002	0.003	0.021	0	0.015	300.114	0.804	0.669084
2011-08-07	9	0.002	0.017	0.017	0	0.001	0	0.001	0.001	0.019	0	0.016	301.954	0.734	-0.249935
2011-08-07	10	0	0.067	0.019	0	0.001	0	0.001	0.001	0.015	0	0.019	303.914	0.639	-0.10343
2011-08-07	11	0	0.147	0.019	0	0.001	0	0	0.001	0.02	0	0.022	305.333	0.575	0.0494283
2011-08-07	12	0.001	0.129	0.016	0	0.001	0	0	0	0.025	0	0.02	306.578	0.527	-0.237854
2011-08-07	13	0.001	0.07	0.014	0	0.001	0	0	0.001	0.027	0	0.024	305.987	0.531	-0.0852867
2011-08-07	14	0	0.028	0.012	0	0.001	0	0.001	0.001	0.026	0	0.029	305.309	0.568	0.132338
2011-08-07	15	0.001	0.019	0.01	0.001	0.001	0	0.001	0.001	0.028	0	0.029	305.646	0.544	0.156603
2011-08-07	16	0.001	0.012	0.009	0	0.001	0	0.001	0.001	0.031	0	0.029	305.46	0.549	0.0269655
2011-08-07	17	0.001	0.005	0.009	0	0	0	0.001	0.001	0.029	0	0.028	305.285	0.54	0.113442
2011-08-07	18	0.001	0.003	0.007	0	0	0	0.001	0.001	0.025	0	0.022	304.954	0.533	-0.101857
2011-08-07	19	0.001	0.002	0.004	0.001	0	0	0.001	0.001	0.025	0	0.02	303.99	0.587	-0.285642
2011-08-07	20	0.001	0.001	0.003	0.001	0	0	0.001	0.001	0.023	0	0.019	302.115	0.656	-0.211222
2011-08-07	21	0.001	0	0.002	0.001	0	0	0.001	0.001	0.02	0	0.017	301.169	0.671	-0.204536
2011-08-07	22	0.001	0	0.002	0.001	0	0	0.001	0.001	0.018	0	0.016	300.672	0.659	-0.173614
2011-08-07	23	0.001	0	0.001	0.001	0	0	0.001	0.001	0.016	0	0.016	299.884	0.706	-0.0498504
2011-08-07	24	0.001	0	0.001	0.002	0	0	0.001	0.001	0.016	0	0.016	299.187	0.774	-0.0427797
2011-09-07	1	0.001	0	0.001	0.001	0	0	0.001	0.001	0.016	0	0.017	298.645	0.831	-0.00379031
2011-09-07	2	0.001	0	0.001	0.001	0	0	0.001	0.001	0.017	0	0.017	298.251	0.873	0.062155
2011-09-07	3	0.001	0.001	0.001	0.002	0.001	0	0.001	0.001	0.02	0	0.018	298.21	0.872	0.0822069
2011-09-07	4	0.002	0.001	0.001	0.002	0.002	0	0.001	0.001	0.022	0	0.019	298.22	0.866	0.0896101
2011-09-07	5	0.002	0.002	0.001	0.002	0.003	0	0.001	0.002	0.022	0	0.019	298.037	0.906	0.248086
2011-09-07	6	0.002	0.004	0.002	0.002	0.005	0.001	0.001	0.002	0.02	0	0.019	298.017	0.915	0.344705
2011-09-07	7	0.002	0.011	0.005	0.002	0.005	0.001	0.001	0.003	0.018	0	0.018	298.823	0.903	0.256759
2011-09-07	8	0.003	0.022	0.011	0.003	0.004	0.001	0.002	0.003	0.018	0.001	0.017	300.743	0.833	0.0225423
2011-09-07	9	0.004	0.041	0.023	0.002	0.003	0	0.002	0.003	0.022	0.001	0.018	302.1	0.779	-0.129172
2011-09-07	10	0.004	0.05	0.029	0.001	0.003	0	0.002	0.003	0.026	0.002	0.019	303.895	0.707	1.37652
2011-09-07	11	0.004	0.056	0.032	0.001	0.002	0	0.001	0.002	0.027	0.001	0.021	305.48	0.644	-0.41625
2011-09-07	12	0.002	0.059	0.038	0	0.001	0	0.001	0.002	0.024	0.001	0.021	306.681	0.592	-0.346663
2011-09-07	13	0.001	0.059	0.036	0	0.001	0	0.001	0.002	0.024	0.001	0.022	307.711	0.55	-0.221427
2011-09-07	14	0.001	0.025	0.022	0	0.001	0	0.001	0.001	0.024	0.001	0.026	306.546	0.578	0.108804
2011-09-07	15	0.001	0.003	0.009	0.001	0	0	0.001	0.001	0.023	0	0.024	306.121	0.597	0.0825072
2011-09-07	16	0.001	0.001	0.005	0	0	0	0	0.001	0.022	0	0.018	305.999	0.6	-0.246524
2011-09-07	17	0.003	0	0.004	0	0	0	0	0	0.02	0	0.013	306.092	0.587	-0.000765395
2011-09-07	18	0.004	0.001	0.004	0	0	0	0	0	0.017	0	0.011	305.608	0.584	0.333921
2011-09-07	19	0.002	0.001	0.004	0	0	0	0	0	0.018	0	0.01	304.429	0.606	-0.238643
2011-09-07	20	0.003	0.001	0.004	0	0	0	0.001	0	0.016	0	0.008	302.435	0.705	-0.0370201
2011-09-07	21	0.002	0.001	0.004	0	0	0	0.001	0	0.016	0	0.009	301.427	0.741	-0.297517
2011-09-07	22	0.001	0.001	0.003	0	0	0	0.001	0	0.015	0	0.008	300.912	0.744	-0.205526
2011-09-07	23	0.001	0	0.003	0	0	0	0.001	0	0.013	0	0.007	300.26	0.776	-0.188797
2011-09-07	24	0.002	0	0.002	0.001	0	0	0	0	0.012	0	0.007	299.815	0.8	-0.260571
2011-10-07	1	0.002	0	0.001	0.001	0	0	0	0	0.01	0	0.006	299.486	0.805	-0.264086
2011-10-07	2	0.002	0	0.001	0	0	0	0	0	0.008	0	0.004	298.994	0.843	0.347771
2011-10-07	3	0.002	0	0	0	0	0	0	0	0.007	0	0.004	298.704	0.869	0.330617
2011-10-07	4	0.002	0	0	0	0	0	0	0	0.008	0	0.004	298.653	0.87	0.377298
2011-10-07	5	0.002	0.001	0.001	0	0	0	0	0	0.01	0	0.007	298.561	0.882	0.53904
2011-10-07	6	0.001	0.002	0.002	0	0	0	0	0	0.012	0	0.01	298.566	0.898	0.31507
2011-10-07	7	0.001	0.002	0.003	0.001	0	0	0	0	0.015	0	0.013	299.45	0.888	0.0761696
2011-10-07	8	0.002	0.002	0.005	0	0	0	0	0	0.021	0	0.015	301.03	0.826	0.254015
2011-10-07	9	0.001	0.002	0.01	0	0	0	0	0.001	0.019	0	0.016	302.314	0.778	-0.114747
2011-10-07	10	0.001	0.002	0.01	0	0	0	0	0.001	0.016	0	0.014	303.827	0.717	-0.178417
2011-10-07	11	0.001	0.001	0.008	0	0	0	0	0.001	0.015	0	0.013	305.111	0.671	-0.246226
2011-10-07	12	0.001	0.001	0.008	0	0	0	0	0.001	0.014	0	0.012	306.096	0.622	-0.321823
2011-10-07	13	0.002	0.001	0.007	0	0	0	0	0.001	0.015	0	0.012	307.366	0.566	-0.552461
2011-10-07	14	0.003	0	0.004	0	0	0	0	0.001	0.013	0	0.009	307.473	0.566	-0.723407
2011-10-07	15	0.002	0	0.003	0	0	0	0	0	0.013	0	0.007	306.372	0.609	-0.385709
2011-10-07	16	0.003	0	0.003	0	0	0	0	0	0.011	0	0.006	305.332	0.646	-0.238242
2011-10-07	17	0.002	0	0.003	0	0	0	0	0	0.009	0	0.005	304.216	0.676	-0.288573
2011-10-07	18	0.004	0	0.003	0	0	0	0	0	0.009	0	0.005	303.14	0.716	0.0166889
2011-10-07	19	0.006	0	0.004	0	0	0	0	0	0.009	0	0.005	301.759	0.77	0.333876
2011-10-07	20	0.007	0	0.004	0	0	0	0	0	0.009	0	0.005	300.52	0.812	0.550749
2011-10-07	21	0.008	0	0.005	0	0	0	0.001	0	0.009	0	0.005	299.784	0.836	0.742899
2011-10-07	22	0.008	0	0.005	0	0	0	0.001	0	0.009	0	0.005	299.311	0.854	0.784083
2011-10-07	23	0.008	0	0.005	0	0	0	0.001	0	0.008	0	0.005	298.906	0.874	0.762702
2011-10-07	24	0.007	0	0.004	0	0	0	0.001	0	0.007	0	0.004	298.656	0.894	0.946247
2011-11-07	1	0.006	0	0.003	0	0	0	0.001	0	0.005	0	0.003	298.505	0.91	1.02945
2011-11-07	2	0.005	0	0.002	0	0	0	0.001	0	0.004	0	0.003	298.478	0.905	0.853117
2011-11-07	3	0.003	0	0.001	0	0	0	0	0	0.004	0	0.003	298.381	0.914	0.501953
2011-11-07	4	0.003	0	0.001	0	0	0	0	0	0.004	0	0.003	298.349	0.922	0.571333
2011-11-07	5	0.003	0	0.001	0	0	0	0	0	0.004	0	0.002	298.304	0.929	0.905884
2011-11-07	6	0.003	0	0.001	0	0	0	0	0	0.005	0	0.003	298.354	0.928	0.803351
2011-11-07	7	0.003	0	0.001	0	0	0	0	0	0.005	0	0.003	299.175	0.922	0.696133
2011-11-07	8	0.003	0	0.001	0	0	0	0	0	0.005	0	0.003	300.603	0.864	0.327439
2011-11-07	9	0	0	0.001	0	0	0	0	0	0.003	0	0.004	301.225	0.845	-0.16024
2011-11-07	10	0	0	0	0	0	0	0	0	0	0	0.001	302.074	0.824	-0.565704
2011-11-07	11	0.002	0	0.001	0	0	0	0	0	0	0	0	303.022	0.799	0.308542
2011-11-07	12	0.003	0	0.001	0	0	0	0	0	0.001	0	0.001	303.83	0.781	-0.129314
2011-11-07	13	0.002	0	0.002	0	0	0	0	0	0.003	0	0.002	304.637	0.743	-0.337814
2011-11-07	14	0.002	0	0.002	0	0	0	0	0	0.004	0	0.002	304.935	0.746	-0.17341
2011-11-07	15	0.001	0	0.002	0	0	0	0	0	0.004	0	0.003	304.594	0.759	0.237137
2011-11-07	16	0.001	0	0.002	0	0	0	0	0	0.004	0	0.003	304.279	0.763	0.227692
2011-11-07	17	0.001	0	0.003	0	0	0	0	0	0.004	0	0.004	303.411	0.763	0.187665
2011-11-07	18	0.001	0	0.003	0	0	0	0	0	0.005	0	0.005	303.48	0.772	0.190069
2011-11-07	19	0.001	0	0.003	0	0	0	0	0	0.006	0	0.005	302.689	0.786	0.182041
2011-11-07	20	0.002	0	0.003	0	0	0	0	0	0.008	0	0.006	301.416	0.836	0.390853
2011-11-07	21	0.002	0.001	0.002	0	0	0	0	0	0.011	0	0.006	300.676	0.852	0.266177
2011-11-07	22	0.004	0.001	0.002	0	0	0	0.001	0	0.013	0	0.007	300.186	0.862	0.530344
2011-11-07	23	0.005	0.001	0.002	0	0	0	0.001	0	0.014	0	0.008	299.788	0.873	0.582642
2011-11-07	24	0.005	0.001	0.002	0	0	0	0.001	0	0.015	0	0.008	299.414	0.888	0.782683
2011-12-07	1	0.005	0.001	0.002	0	0	0	0.001	0	0.016	0	0.009	299.041	0.905	0.804916
2011-12-07	2	0.004	0.001	0.002	0	0	0	0.001	0	0.017	0	0.009	298.812	0.903	0.772731
2011-12-07	3	0.004	0.001	0.002	0	0.001	0	0.001	0	0.018	0	0.01	298.531	0.919	0.915547
2011-12-07	4	0.004	0.001	0.002	0	0.001	0	0.001	0	0.019	0	0.01	298.347	0.927	1.08199
2011-12-07	5	0.003	0.001	0.001	0	0.001	0	0.001	0	0.021	0	0.011	298.182	0.934	1.27493
2011-12-07	6	0.002	0.001	0.002	0	0.001	0	0.001	0	0.017	0	0.013	297.991	0.942	0.363531
2011-12-07	7	0.001	0.001	0.001	0	0	0	0.001	0	0.014	0	0.016	298.359	0.943	0.218764
2011-12-07	8	0	0.001	0.002	0	0	0	0	0	0.013	0	0.022	299.695	0.899	-0.145663
2011-12-07	9	0	0.002	0.003	0	0.001	0	0	0	0.013	0	0.028	301.188	0.841	-0.347988
2011-12-07	10	0	0.007	0.008	0	0	0	0	0	0.012	0	0.027	302.854	0.766	-0.487048
2011-12-07	11	0	0.008	0.01	0	0	0	0	0	0.01	0	0.024	304.524	0.709	-0.576664
2011-12-07	12	0	0.008	0.012	0	0	0	0	0	0.01	0	0.022	306.35	0.641	-0.635184
2011-12-07	13	0	0.007	0.013	0	0	0	0	0	0.009	0	0.021	307.848	0.581	-0.708373
2011-12-07	14	0	0.008	0.015	0	0	0	0	0	0.009	0	0.021	308.33	0.567	-0.717645
2011-12-07	15	0	0.011	0.017	0	0	0	0	0	0.01	0	0.021	307.836	0.581	-0.685466
2011-12-07	16	0	0.014	0.019	0	0	0	0	0	0.011	0	0.022	307.077	0.602	-0.652938
2011-12-07	17	0	0.016	0.019	0	0	0	0	0	0.011	0	0.022	306.017	0.629	-0.622353
2011-12-07	18	0	0.015	0.017	0	0	0	0	0	0.011	0	0.026	304.792	0.659	-0.63068
2011-12-07	19	0	0.012	0.015	0	0	0	0	0	0.012	0	0.024	303.452	0.69	-0.559862
2011-12-07	20	0	0.008	0.012	0	0	0	0	0	0.014	0	0.022	301.617	0.754	-0.400867
2011-12-07	21	0	0.006	0.01	0	0	0	0.001	0	0.016	0	0.02	300.576	0.787	-0.179806
2011-12-07	22	0.001	0.004	0.008	0	0	0	0.001	0	0.016	0	0.018	299.946	0.81	-0.0513622
2011-12-07	23	0.001	0.003	0.007	0	0	0	0.001	0	0.016	0	0.016	299.467	0.839	0.00955368
2011-12-07	24	0.001	0.002	0.005	0	0	0	0	0	0.015	0	0.015	298.976	0.879	0.118456
07/13/2011	1	0.001	0.001	0.002	0	0	0	0	0	0.013	0	0.013	298.565	0.916	0.24147
07/13/2011	2	0.001	0.001	0.001	0	0	0	0	0	0.011	0	0.012	298.361	0.92	0.18492
07/13/2011	3	0.001	0.001	0.001	0	0	0	0	0	0.011	0	0.011	298.187	0.929	0.295097
07/13/2011	4	0.001	0.001	0.001	0	0	0	0	0	0.013	0	0.011	297.943	0.951	0.541746
07/13/2011	5	0.002	0.001	0.001	0	0.001	0	0	0	0.015	0	0.013	297.788	0.96	0.483061
07/13/2011	6	0.002	0.002	0.001	0	0.002	0	0.001	0	0.018	0	0.014	297.734	0.955	0.562053
07/13/2011	7	0.003	0.003	0.002	0	0.003	0	0.001	0.001	0.021	0	0.015	298.449	0.946	0.498688
07/13/2011	8	0.004	0.009	0.006	0.001	0.004	0	0.001	0.001	0.024	0.001	0.016	300.128	0.901	1.8195
07/13/2011	9	0.003	0.021	0.011	0.001	0.003	0	0.001	0.001	0.021	0	0.014	301.674	0.846	1.67561
07/13/2011	10	0.003	0.024	0.013	0	0.001	0	0.001	0.001	0.016	0	0.011	303.091	0.791	-0.737382
07/13/2011	11	0.002	0.015	0.014	0	0.001	0	0	0	0.014	0	0.01	304.401	0.744	-0.361847
07/13/2011	12	0.001	0.01	0.016	0	0.001	0	0	0	0.013	0	0.012	305.676	0.684	-0.173683
07/13/2011	13	0	0.007	0.017	0	0	0	0	0	0.012	0	0.014	306.449	0.65	-0.22996
07/13/2011	14	0	0.005	0.016	0	0	0	0	0	0.012	0	0.014	306.545	0.65	-0.229598
07/13/2011	15	0	0.004	0.014	0	0	0	0	0	0.012	0	0.014	305.793	0.667	-0.216624
07/13/2011	16	0	0.002	0.011	0	0	0	0	0	0.01	0	0.013	303.467	0.728	-0.296247
07/13/2011	17	0	0.001	0.009	0	0	0	0	0	0.011	0	0.013	302.841	0.771	-0.167114
07/13/2011	18	0.001	0.001	0.009	0	0	0	0	0	0.012	0	0.013	301.649	0.801	0.0256812
07/13/2011	19	0.001	0.002	0.01	0	0	0	0	0	0.014	0	0.012	300.809	0.836	0.195921
07/13/2011	20	0.002	0.003	0.01	0	0	0	0	0	0.016	0	0.012	299.543	0.858	0.295278
07/13/2011	21	0.002	0.005	0.009	0	0	0	0.001	0.001	0.017	0	0.011	298.731	0.889	0.0709728
07/13/2011	22	0.002	0.007	0.007	0	0	0	0.001	0.001	0.019	0	0.011	298.23	0.906	0.160127
07/13/2011	23	0.004	0.008	0.006	0	0	0	0.001	0.001	0.018	0	0.011	297.941	0.909	0.3719
07/13/2011	24	0.006	0.007	0.007	0	0.001	0	0.001	0.001	0.018	0	0.01	297.709	0.916	0.9353
07/14/2011	1	0.006	0.008	0.007	0	0.001	0	0.001	0.001	0.017	0	0.01	297.589	0.912	0.764939
07/14/2011	2	0.007	0.008	0.008	0	0.001	0	0.002	0.001	0.016	0	0.01	297.462	0.916	0.866849
07/14/2011	3	0.007	0.009	0.008	0	0.001	0	0.002	0.001	0.016	0	0.01	297.357	0.919	0.869243
07/14/2011	4	0.006	0.009	0.007	0	0.001	0	0.002	0.001	0.016	0	0.01	297.249	0.925	0.919407
07/14/2011	5	0.006	0.008	0.006	0	0.001	0	0.002	0.001	0.015	0	0.01	297.18	0.92	0.836812
07/14/2011	6	0.006	0.008	0.006	0	0.001	0	0.002	0.001	0.015	0	0.011	297.081	0.932	0.669011
07/14/2011	7	0.006	0.007	0.006	0	0.002	0	0.003	0.001	0.015	0	0.011	297.94	0.907	0.805019
07/14/2011	8	0.007	0.013	0.012	0.001	0.002	0	0.003	0.001	0.017	0	0.012	299.884	0.855	1.65543
07/14/2011	9	0.016	0.071	0.025	0	0.002	0	0.003	0.001	0.027	0.001	0.017	301.466	0.81	-0.1087
07/14/2011	10	0.021	0.118	0.032	0	0.002	0	0.002	0.001	0.036	0.001	0.021	303.149	0.749	-0.227507
07/14/2011	11	0.007	0.12	0.041	0	0.001	0	0.001	0.001	0.046	0.001	0.025	304.661	0.692	-0.982209
07/14/2011	12	0.001	0.037	0.03	0	0	0	0.001	0.001	0.03	0	0.027	304.666	0.681	-0.0245071
07/14/2011	13	0	0.005	0.015	0	0	0	0	0	0.016	0	0.02	305.646	0.651	-0.329682
07/14/2011	14	0	0.002	0.009	0	0	0	0	0	0.011	0	0.015	305.746	0.652	-0.415866
07/14/2011	15	0	0.001	0.008	0	0	0	0	0	0.009	0	0.012	305.004	0.675	-0.366752
07/14/2011	16	0	0.001	0.007	0	0	0	0	0	0.007	0	0.01	303.906	0.712	-0.389122
07/14/2011	17	0	0.002	0.006	0	0	0	0	0	0.006	0	0.009	302.994	0.749	-0.372702
07/14/2011	18	0	0.004	0.007	0	0	0	0	0	0.006	0	0.009	302.169	0.795	-0.305997
07/14/2011	19	0	0.005	0.009	0	0	0	0	0	0.007	0	0.01	300.974	0.852	-0.199564
07/14/2011	20	0.001	0.007	0.01	0	0	0	0	0	0.008	0	0.01	300.034	0.896	0.063864
07/14/2011	21	0.001	0.007	0.012	0	0	0	0	0	0.009	0	0.01	299.486	0.918	0.19698
07/14/2011	22	0.001	0.008	0.012	0	0	0	0	0	0.009	0	0.011	298.796	0.94	0.214154
07/14/2011	23	0.001	0.01	0.011	0	0	0	0	0.001	0.011	0	0.012	298.214	0.96	0.363043
07/14/2011	24	0.001	0.013	0.01	0	0	0	0.001	0.001	0.015	0	0.015	297.883	0.97	0.544326
07/15/2011	1	0.002	0.015	0.01	0	0.001	0	0.001	0.002	0.019	0	0.018	297.703	0.971	0.627975
07/15/2011	2	0.002	0.018	0.01	0	0.001	0	0.002	0.003	0.025	0	0.022	297.591	0.968	0.685126
07/15/2011	3	0.002	0.019	0.01	0	0.001	0.001	0.002	0.004	0.031	0	0.027	297.527	0.963	0.612818
07/15/2011	4	0.003	0.019	0.01	0	0.002	0.001	0.002	0.004	0.038	0	0.032	297.476	0.96	0.645961
07/15/2011	5	0.003	0.017	0.009	0	0.002	0.001	0.003	0.004	0.046	0	0.036	297.441	0.956	0.685057
07/15/2011	6	0.004	0.014	0.008	0.001	0.002	0.001	0.003	0.004	0.055	0	0.04	297.428	0.952	0.668877
07/15/2011	7	0.005	0.011	0.007	0.001	0.003	0.001	0.003	0.004	0.063	0	0.042	298.255	0.935	0.631586
07/15/2011	8	0.005	0.016	0.015	0.001	0.003	0.001	0.003	0.003	0.064	0.001	0.043	299.512	0.873	0.273181
07/15/2011	9	0.001	0.016	0.024	0	0.001	0	0.001	0.001	0.035	0	0.034	300.119	0.844	0.060985
07/15/2011	10	0.001	0.005	0.016	0	0.001	0	0.001	0.001	0.022	0	0.026	301.467	0.811	-0.0324672
07/15/2011	11	0	0.002	0.013	0	0.001	0	0	0	0.017	0	0.021	301.02	0.793	-0.181984
07/15/2011	12	0.001	0.001	0.009	0	0.001	0	0.001	0.001	0.018	0	0.019	302.296	0.776	-0.0162121
07/15/2011	13	0.001	0.001	0.01	0	0	0	0	0.001	0.015	0	0.017	303.165	0.741	-0.0852685
07/15/2011	14	0	0.001	0.009	0	0	0	0	0	0.011	0	0.016	302.758	0.747	-0.355946
07/15/2011	15	0	0.001	0.007	0	0	0	0	0	0.009	0	0.016	302.106	0.773	-0.423032
07/15/2011	16	0	0.002	0.005	0	0	0	0	0	0.008	0	0.016	301.591	0.8	-0.415056
07/15/2011	17	0	0.003	0.005	0	0	0	0	0	0.007	0	0.017	300.943	0.823	-0.426216
07/15/2011	18	0	0.005	0.006	0	0	0	0	0	0.006	0	0.017	300.144	0.859	-0.372125
07/15/2011	19	0	0.006	0.005	0	0	0	0	0	0.006	0	0.019	299.771	0.879	-0.33776
07/15/2011	20	0	0.003	0.003	0	0	0	0	0	0.006	0	0.017	298.807	0.909	-0.229635
07/15/2011	21	0	0.004	0.003	0	0	0	0	0	0.006	0	0.014	298.226	0.945	0.0115668
07/15/2011	22	0	0.007	0.003	0	0	0	0	0	0.007	0	0.014	297.97	0.958	0.127996
07/15/2011	23	0	0.009	0.002	0	0	0	0	0	0.008	0	0.015	297.822	0.96	0.143702
07/15/2011	24	0	0.007	0.001	0	0.001	0	0.001	0	0.008	0	0.013	297.68	0.967	0.359192
07/16/2011	1	0.001	0.005	0.001	0	0.001	0	0.001	0	0.007	0	0.009	297.578	0.97	0.496861
07/16/2011	2	0.001	0.003	0.001	0	0.001	0	0.001	0	0.005	0	0.004	297.689	0.958	0.402169
07/16/2011	3	0.002	0.001	0.001	0	0.001	0	0.001	0	0.004	0	0.003	297.465	0.966	1.21128
07/16/2011	4	0.003	0.001	0.001	0	0.001	0	0.001	0	0.003	0	0.003	297.345	0.966	1.21517
07/16/2011	5	0.003	0.001	0.001	0	0.001	0	0.001	0	0.003	0	0.003	297.188	0.969	1.22026
07/16/2011	6	0.002	0.002	0.002	0	0.001	0	0.001	0	0.004	0	0.003	297.082	0.96	0.901453
07/16/2011	7	0.001	0.003	0.003	0	0.001	0	0.001	0	0.005	0	0.004	297.753	0.931	0.149051
07/16/2011	8	0.001	0.002	0.004	0	0	0	0	0	0.005	0	0.004	298.688	0.906	0.476155
07/16/2011	9	0.001	0.001	0.005	0	0	0	0	0	0.004	0	0.004	299.594	0.882	0.253299
07/16/2011	10	0.001	0	0.004	0	0	0	0	0	0.003	0	0.003	299.786	0.864	0.243191
07/16/2011	11	0.001	0.001	0.004	0	0	0	0	0	0.003	0	0.003	301.227	0.822	0.192387
07/16/2011	12	0.001	0.002	0.003	0	0	0	0	0	0.003	0	0.003	301.841	0.809	0.192038
07/16/2011	13	0	0.003	0.003	0	0	0	0	0	0.003	0	0.005	301.87	0.81	-0.33812
07/16/2011	14	0	0.003	0.003	0	0	0	0	0	0.004	0	0.007	302.317	0.81	-0.354962
07/16/2011	15	0	0.002	0.003	0	0	0	0	0	0.005	0	0.009	302.002	0.824	-0.348258
07/16/2011	16	0	0.003	0.004	0	0	0	0	0	0.005	0	0.01	301.61	0.839	-0.343006
07/16/2011	17	0	0.002	0.005	0	0	0	0	0	0.005	0	0.009	301.072	0.858	-0.27066
07/16/2011	18	0.001	0.001	0.005	0	0	0	0	0	0.005	0	0.007	300.447	0.877	-0.01672
07/16/2011	19	0.001	0	0.004	0	0	0	0	0	0.004	0	0.004	299.681	0.896	0.311218
07/16/2011	20	0.001	0	0.003	0	0	0	0	0	0.004	0	0.003	298.834	0.905	0.631609
07/16/2011	21	0.001	0	0.003	0	0	0	0	0	0.004	0	0.004	298.221	0.917	0.361464
07/16/2011	22	0.001	0	0.003	0	0	0	0	0	0.004	0	0.004	297.73	0.915	0.35719
07/16/2011	23	0.001	0	0.003	0	0	0	0	0	0.005	0	0.004	297.064	0.93	0.575149
07/16/2011	24	0.001	0	0.003	0	0	0	0	0	0.006	0	0.005	296.489	0.943	0.550309
07/17/2011	1	0.001	0	0.004	0	0	0	0	0	0.007	0	0.005	296.048	0.928	0.644826
07/17/2011	2	0.001	0.001	0.004	0	0	0	0	0	0.008	0	0.006	295.572	0.932	0.545956
07/17/2011	3	0.002	0.001	0.003	0	0.001	0	0	0	0.009	0	0.006	295.509	0.931	0.246081
07/17/2011	4	0.002	0.001	0.003	0	0.001	0	0.001	0	0.011	0	0.007	295.503	0.934	0.448255
07/17/2011	5	0.002	0.001	0.003	0	0.001	0	0.001	0	0.012	0	0.007	295.635	0.925	0.626636
07/17/2011	6	0.002	0.002	0.004	0	0.001	0	0.001	0	0.013	0	0.008	295.67	0.932	0.374097
07/17/2011	7	0.002	0.002	0.005	0	0.001	0	0	0	0.011	0	0.007	296.276	0.929	0.25615
07/17/2011	8	0.001	0	0.007	0	0	0	0	0	0.01	0	0.008	297.507	0.891	0.309881
07/17/2011	9	0.001	0	0.008	0	0	0	0	0	0.009	0	0.008	297.751	0.866	0.195477
07/17/2011	10	0.001	0	0.008	0	0	0	0	0	0.01	0	0.009	299.769	0.797	0.11651
07/17/2011	11	0.001	0	0.009	0	0	0	0	0	0.01	0	0.009	300.103	0.765	0.103445
07/17/2011	12	0.001	0.001	0.009	0	0	0	0	0	0.01	0	0.009	301.623	0.716	0.13747
07/17/2011	13	0.001	0.001	0.012	0	0	0	0	0	0.009	0	0.008	302.406	0.686	0.151649
07/17/2011	14	0.001	0.001	0.012	0	0	0	0	0	0.008	0	0.008	302.666	0.678	0.208861
07/17/2011	15	0.001	0.001	0.011	0	0	0	0	0	0.008	0	0.007	302.252	0.686	0.119081
07/17/2011	16	0.001	0.001	0.009	0	0	0	0	0	0.008	0	0.007	301.019	0.707	0.0811686
07/17/2011	17	0.002	0.001	0.007	0	0	0	0	0	0.01	0	0.007	301.437	0.708	0.0500678
07/17/2011	18	0.002	0.001	0.007	0	0.001	0	0	0	0.01	0	0.007	300.549	0.725	-0.382788
07/17/2011	19	0.002	0.002	0.007	0.001	0.001	0	0.001	0.001	0.011	0	0.008	299.549	0.752	-0.261192
07/17/2011	20	0.002	0.002	0.006	0.001	0.001	0	0.001	0.001	0.013	0	0.01	298.525	0.774	-0.21411
07/17/2011	21	0.002	0.001	0.004	0.001	0.001	0	0.001	0.001	0.015	0	0.011	297.966	0.795	-0.135967
07/17/2011	22	0.002	0.002	0.004	0.001	0.001	0	0.001	0.001	0.018	0	0.013	297.563	0.818	-0.0671961
07/17/2011	23	0.002	0.002	0.004	0.001	0.001	0	0.001	0.001	0.02	0	0.015	297.234	0.839	-0.00664294
07/17/2011	24	0.002	0.002	0.004	0.001	0.001	0	0.001	0.001	0.022	0	0.016	296.89	0.87	0.0956282
07/18/2011	1	0.002	0.003	0.004	0.001	0.001	0	0.001	0.001	0.023	0	0.017	296.674	0.886	0.170167
07/18/2011	2	0.002	0.004	0.004	0.001	0.001	0	0.001	0.001	0.024	0	0.018	296.426	0.908	0.257467
07/18/2011	3	0.003	0.004	0.004	0.001	0.001	0.001	0.001	0.002	0.025	0	0.018	296.288	0.91	0.330421
07/18/2011	4	0.003	0.005	0.005	0.001	0.002	0.001	0.002	0.002	0.026	0	0.019	296.215	0.899	0.334014
07/18/2011	5	0.003	0.006	0.005	0.001	0.002	0.001	0.002	0.002	0.027	0	0.019	296.067	0.9	0.354392
07/18/2011	6	0.004	0.008	0.006	0.001	0.003	0.001	0.002	0.003	0.027	0.001	0.019	295.961	0.898	1.69535
07/18/2011	7	0.005	0.012	0.008	0.001	0.003	0.001	0.003	0.003	0.025	0.001	0.019	296.407	0.884	1.62768
07/18/2011	8	0.004	0.027	0.018	0.001	0.003	0.001	0.002	0.003	0.023	0.001	0.017	297.777	0.841	1.44349
07/18/2011	9	0.003	0.036	0.021	0	0.003	0	0.002	0.001	0.017	0.001	0.012	299.494	0.775	-0.913105
07/18/2011	10	0.003	0.023	0.016	0	0.002	0	0.001	0.001	0.013	0	0.009	301.044	0.714	-0.996439
07/18/2011	11	0.002	0.013	0.013	0	0.001	0	0.001	0.001	0.013	0	0.009	302.559	0.657	-1.09823
07/18/2011	12	0.001	0.008	0.012	0	0.001	0	0.001	0.001	0.013	0	0.011	303.816	0.612	-0.506511
07/18/2011	13	0.001	0.005	0.012	0	0.001	0	0.001	0	0.015	0	0.013	304.995	0.571	-0.292593
07/18/2011	14	0.001	0.004	0.011	0	0.001	0	0.001	0	0.018	0	0.017	305.795	0.534	-0.0714764
07/18/2011	15	0.001	0.004	0.012	0	0.001	0	0	0	0.021	0	0.02	305.555	0.528	0.0436727
07/18/2011	16	0.001	0.004	0.012	0	0.001	0	0	0.001	0.023	0	0.022	305.372	0.533	0.00254062
07/18/2011	17	0.001	0.004	0.011	0	0.001	0	0.001	0.001	0.025	0	0.023	304.872	0.544	-0.0771307
07/18/2011	18	0.001	0.003	0.01	0	0.001	0	0.001	0.001	0.027	0	0.026	304.269	0.548	0.0417545
07/18/2011	19	0.001	0.003	0.01	0	0.001	0	0.001	0.001	0.028	0	0.023	303.561	0.545	-0.279771
07/18/2011	20	0.003	0.003	0.009	0	0.001	0	0.001	0.002	0.031	0	0.022	301.938	0.591	-0.460011
07/18/2011	21	0.005	0.004	0.008	0	0.001	0.001	0.002	0.003	0.034	0	0.022	300.65	0.621	-0.0742194
07/18/2011	22	0.011	0.005	0.008	0	0.001	0.001	0.002	0.003	0.032	0	0.021	299.623	0.664	0.493173
07/18/2011	23	0.015	0.006	0.009	0	0.001	0.001	0.002	0.004	0.03	0	0.021	298.792	0.714	0.82358
07/18/2011	24	0.018	0.007	0.01	0	0.002	0.001	0.003	0.005	0.029	0	0.022	298.043	0.773	1.11515
07/19/2011	1	0.018	0.008	0.011	0	0.002	0.001	0.003	0.005	0.028	0.001	0.022	297.354	0.838	1.1928
07/19/2011	2	0.015	0.009	0.012	0	0.002	0.001	0.003	0.006	0.03	0.001	0.024	296.859	0.882	1.08622
07/19/2011	3	0.013	0.011	0.012	0	0.002	0.001	0.003	0.006	0.033	0.001	0.025	296.578	0.899	1.10197
07/19/2011	4	0.011	0.012	0.013	0	0.002	0.001	0.004	0.006	0.035	0.001	0.027	296.373	0.906	0.859438
07/19/2011	5	0.01	0.013	0.013	0	0.002	0.001	0.004	0.006	0.037	0.001	0.028	296.207	0.911	0.787458
07/19/2011	6	0.01	0.014	0.013	0	0.002	0.001	0.004	0.007	0.037	0.001	0.028	296.074	0.918	1.00484
07/19/2011	7	0.012	0.015	0.013	0	0.002	0.001	0.004	0.007	0.037	0.001	0.028	296.757	0.924	1.15048
07/19/2011	8	0.009	0.013	0.014	0	0.002	0.001	0.004	0.007	0.037	0.001	0.029	299.118	0.838	0.325278
07/19/2011	9	0.002	0.043	0.028	0	0.002	0.001	0.003	0.005	0.041	0	0.035	300.99	0.767	-0.0643467
07/19/2011	10	0.001	0.137	0.036	0	0.002	0.001	0.002	0.003	0.038	0	0.04	302.824	0.678	0.0668389
07/19/2011	11	0	0.265	0.047	0	0.001	0	0.001	0.002	0.034	0	0.045	304.104	0.62	-0.309063
07/19/2011	12	0	0.225	0.041	0	0.001	0	0.001	0.002	0.032	0	0.045	305.167	0.576	-0.419519
07/19/2011	13	0	0.161	0.034	0	0.001	0	0.001	0.001	0.031	0	0.045	306.473	0.536	-0.514693
07/19/2011	14	0	0.1	0.026	0	0.001	0	0.001	0.001	0.023	0	0.045	307.162	0.52	-0.694778
07/19/2011	15	0	0.054	0.021	0	0	0	0	0.001	0.017	0	0.052	306.993	0.534	-0.795611
07/19/2011	16	0	0.033	0.019	0	0	0	0	0.001	0.015	0	0.057	306.496	0.561	-0.790168
07/19/2011	17	0	0.029	0.017	0	0	0	0	0.001	0.015	0	0.057	305.752	0.591	-0.762552
07/19/2011	18	0	0.026	0.013	0	0	0	0	0.001	0.016	0	0.055	304.88	0.624	-0.724589
07/19/2011	19	0	0.025	0.01	0	0	0	0.001	0.001	0.017	0	0.052	303.909	0.658	-0.661734
07/19/2011	20	0	0.02	0.007	0	0	0	0.001	0.001	0.021	0	0.051	302.283	0.718	-0.556742
07/19/2011	21	0	0.015	0.005	0	0	0	0.001	0.002	0.025	0	0.051	301.056	0.76	-0.45909
07/19/2011	22	0	0.013	0.004	0.001	0	0	0.001	0.002	0.028	0	0.051	300.184	0.792	-0.381229
07/19/2011	23	0	0.011	0.004	0.001	0.001	0	0.001	0.002	0.03	0	0.05	299.487	0.822	-0.286861
07/19/2011	24	0	0.01	0.003	0.001	0.001	0	0.001	0.002	0.031	0	0.048	298.927	0.851	-0.204732
07/20/2011	1	0	0.009	0.003	0.001	0.001	0	0.001	0.002	0.03	0	0.045	298.484	0.876	-0.121053
07/20/2011	2	0	0.007	0.002	0.001	0.001	0	0.001	0.002	0.03	0	0.042	298.084	0.899	-0.030923
07/20/2011	3	0.001	0.005	0.002	0.001	0.001	0	0.001	0.002	0.03	0	0.039	297.833	0.909	0.0567262
07/20/2011	4	0.001	0.004	0.002	0.001	0.002	0	0.001	0.002	0.03	0	0.035	297.641	0.915	0.169153
07/20/2011	5	0.001	0.003	0.002	0.001	0.002	0	0.001	0.002	0.032	0	0.033	297.493	0.919	0.23409
07/20/2011	6	0.002	0.003	0.001	0.001	0.003	0	0.001	0.002	0.034	0	0.031	297.393	0.923	0.308505
07/20/2011	7	0.002	0.003	0.001	0.001	0.004	0.001	0.002	0.003	0.038	0	0.031	298.153	0.909	0.344696
07/20/2011	8	0.003	0.006	0.003	0.001	0.004	0.001	0.002	0.003	0.041	0	0.032	299.953	0.861	0.160861
07/20/2011	9	0.004	0.016	0.01	0.001	0.003	0.001	0.001	0.003	0.046	0	0.031	301.229	0.827	0.0816379
07/20/2011	10	0.003	0.02	0.013	0	0.001	0	0.001	0.002	0.042	0	0.029	302.389	0.793	-0.0880296
07/20/2011	11	0.001	0.019	0.014	0	0.001	0	0.001	0.001	0.033	0	0.028	303.502	0.76	-0.0446924
07/20/2011	12	0.001	0.007	0.013	0	0	0	0	0.001	0.024	0	0.027	303.004	0.774	-0.0820216
07/20/2011	13	0	0.002	0.01	0	0	0	0	0.001	0.017	0	0.025	303.939	0.747	-0.348878
07/20/2011	14	0	0.001	0.009	0	0	0	0	0	0.014	0	0.023	304.619	0.723	-0.451398
07/20/2011	15	0	0	0.008	0	0	0	0	0	0.012	0	0.02	304.595	0.715	-0.457757
07/20/2011	16	0	0	0.006	0	0	0	0	0	0.009	0	0.016	302.969	0.739	-0.461448
07/20/2011	17	0	0	0.005	0	0	0	0	0	0.009	0	0.015	303.126	0.769	-0.395617
07/20/2011	18	0	0	0.004	0	0	0	0	0	0.008	0	0.015	302.067	0.794	-0.410658
07/20/2011	19	0	0.001	0.003	0	0	0	0	0	0.008	0	0.014	301.458	0.817	-0.340328
07/20/2011	20	0	0.001	0.003	0	0	0	0	0	0.009	0	0.015	300.31	0.84	-0.289478
07/20/2011	21	0.001	0.001	0.002	0	0	0	0	0	0.012	0	0.015	299.562	0.861	-0.0572896
07/20/2011	22	0.001	0.001	0.002	0	0	0	0	0	0.014	0	0.014	299.1	0.87	0.116821
07/20/2011	23	0.001	0.001	0.002	0	0	0	0	0	0.015	0	0.014	298.874	0.876	0.168657
07/20/2011	24	0.001	0.001	0.002	0	0	0	0	0	0.015	0	0.014	298.694	0.885	0.192704
07/21/2011	1	0.001	0.001	0.002	0	0	0	0	0	0.015	0	0.014	298.475	0.897	0.220142
07/21/2011	2	0.001	0.001	0.003	0	0	0	0	0	0.015	0	0.014	298.233	0.906	0.252356
07/21/2011	3	0.001	0.001	0.003	0	0	0	0	0	0.014	0	0.014	297.953	0.916	0.235625
07/21/2011	4	0.001	0.001	0.003	0	0	0	0	0	0.014	0	0.014	297.725	0.923	0.233693
07/21/2011	5	0.001	0.002	0.003	0	0	0	0	0	0.014	0	0.014	297.578	0.929	0.275641
07/21/2011	6	0.001	0.003	0.004	0	0	0	0.001	0	0.015	0	0.014	297.506	0.932	0.243507
07/21/2011	7	0.001	0.005	0.004	0	0	0	0.001	0	0.015	0	0.014	297.698	0.936	0.295128
07/21/2011	8	0.001	0.009	0.005	0	0	0	0	0	0.011	0	0.015	299.518	0.885	-0.0420169
07/21/2011	9	0	0.033	0.012	0	0	0	0	0	0.008	0	0.026	300.404	0.871	-0.365143
07/21/2011	10	0	0.029	0.015	0	0	0	0	0	0.008	0	0.031	301.442	0.835	-0.450378
07/21/2011	11	0	0.02	0.014	0	0	0	0	0	0.009	0	0.032	302.698	0.781	-0.542811
07/21/2011	12	0	0.013	0.013	0	0	0	0	0	0.008	0	0.031	303.548	0.741	-0.604785
07/21/2011	13	0	0.005	0.01	0	0	0	0	0	0.006	0	0.026	303.611	0.722	-0.639158
07/21/2011	14	0	0.002	0.006	0	0	0	0	0	0.005	0	0.021	303.777	0.715	-0.63647
07/21/2011	15	0	0.001	0.005	0	0	0	0	0	0.004	0	0.018	303.658	0.718	-0.641909
07/21/2011	16	0	0.001	0.004	0	0	0	0	0	0.003	0	0.015	303.643	0.719	-0.649077
07/21/2011	17	0	0.001	0.003	0	0	0	0	0	0.003	0	0.012	303.447	0.716	-0.632899
07/21/2011	18	0	0.001	0.003	0	0	0	0	0	0.003	0	0.011	303.143	0.71	-0.637519
07/21/2011	19	0	0	0.002	0	0	0	0	0	0.004	0	0.01	302.046	0.742	-0.550753
07/21/2011	20	0	0	0.002	0	0	0	0	0	0.004	0	0.009	300.749	0.783	-0.477101
07/21/2011	21	0	0	0.001	0	0	0	0	0	0.005	0	0.008	299.964	0.8	-0.3442
07/21/2011	22	0	0	0.001	0	0	0	0	0	0.005	0	0.008	299.323	0.829	-0.296288
07/21/2011	23	0	0.001	0.001	0	0	0	0	0	0.004	0	0.009	298.719	0.88	-0.286646
07/21/2011	24	0	0.001	0.001	0	0	0	0	0	0.003	0	0.009	298.32	0.911	-0.237524
07/22/2011	1	0	0.002	0.001	0	0	0	0.001	0	0.008	0	0.013	297.944	0.938	0.0631224
07/22/2011	2	0.002	0.006	0.001	0	0.001	0	0.002	0	0.021	0	0.015	297.655	0.957	0.589823
07/22/2011	3	0.011	0.009	0.001	0	0.002	0	0.003	0.001	0.026	0	0.016	297.596	0.948	1.75779
07/22/2011	4	0.014	0.009	0.001	0.001	0.002	0	0.004	0.001	0.025	0	0.017	297.288	0.967	2.31359
07/22/2011	5	0.015	0.011	0.001	0.001	0.003	0	0.005	0.001	0.023	0	0.017	297.052	0.982	2.33092
07/22/2011	6	0.017	0.015	0.002	0.001	0.003	0	0.005	0.002	0.02	0	0.016	296.875	0.982	2.39429
07/22/2011	7	0.018	0.019	0.003	0.001	0.003	0	0.005	0.002	0.017	0	0.015	297.508	0.962	2.11953
07/22/2011	8	0.016	0.031	0.011	0.001	0.003	0.001	0.005	0.002	0.014	0.001	0.014	298.745	0.94	1.96044
07/22/2011	9	0.011	0.068	0.042	0.001	0.003	0	0.004	0.002	0.014	0.001	0.013	300.377	0.87	1.43629
07/22/2011	10	0.002	0.083	0.055	0	0.002	0	0.002	0.002	0.018	0.001	0.017	301.955	0.779	-0.155797
07/22/2011	11	0	0.057	0.04	0	0.001	0	0.001	0.001	0.015	0	0.02	303.329	0.714	-0.174954
07/22/2011	12	0	0.03	0.029	0	0.001	0	0.001	0.001	0.014	0	0.02	304.51	0.659	-0.278713
07/22/2011	13	0	0.016	0.021	0	0.001	0	0.001	0	0.014	0	0.018	305.518	0.611	-0.229279
07/22/2011	14	0.001	0.009	0.015	0	0	0	0.001	0	0.014	0	0.014	305.778	0.6	-0.0226808
07/22/2011	15	0.002	0.005	0.01	0	0	0	0.001	0	0.015	0	0.012	304.792	0.623	-0.405563
07/22/2011	16	0.003	0.003	0.007	0	0	0	0.001	0	0.017	0	0.01	303.945	0.677	-0.634025
07/22/2011	17	0.006	0.003	0.006	0	0	0	0.001	0	0.016	0	0.009	303.023	0.715	-0.0600608
07/22/2011	18	0.007	0.003	0.005	0	0.001	0	0.001	0	0.014	0	0.008	302.315	0.765	0.370885
07/22/2011	19	0.006	0.003	0.005	0	0.001	0	0.001	0	0.012	0	0.007	301.12	0.826	0.435457
07/22/2011	20	0.007	0.003	0.004	0	0.001	0	0.001	0	0.01	0	0.006	299.927	0.881	0.835653
07/22/2011	21	0.011	0.004	0.002	0	0.001	0	0.002	0.001	0.008	0	0.006	299.264	0.9	1.44629
07/22/2011	22	0.012	0.005	0.002	0	0.001	0	0.003	0.001	0.007	0	0.007	298.833	0.908	1.51523
07/22/2011	23	0.013	0.005	0.002	0	0.001	0	0.003	0.001	0.007	0	0.007	298.498	0.918	1.61334
07/22/2011	24	0.013	0.005	0.002	0	0.002	0	0.004	0.001	0.008	0	0.008	298.167	0.937	1.83883
07/23/2011	1	0.012	0.005	0.001	0	0.002	0	0.004	0.001	0.01	0	0.009	297.777	0.961	1.98307
07/23/2011	2	0.004	0.003	0.001	0	0.002	0	0.003	0.001	0.014	0	0.01	297.546	0.965	1.65929
07/23/2011	3	0.002	0.002	0.002	0	0.001	0	0.002	0.001	0.016	0	0.012	297.573	0.951	0.461166
07/23/2011	4	0.002	0.004	0.003	0	0.001	0	0.001	0.001	0.015	0	0.013	297.41	0.963	0.522874
07/23/2011	5	0.001	0.006	0.005	0	0.001	0	0.001	0.001	0.011	0	0.014	297.205	0.974	0.497579
07/23/2011	6	0	0.007	0.006	0	0.001	0	0.001	0.001	0.008	0	0.015	297.139	0.975	0.486032
07/23/2011	7	0	0.009	0.008	0	0.001	0	0	0	0.006	0	0.017	297.868	0.952	-0.000189547
07/23/2011	8	0	0.02	0.02	0	0	0	0	0	0.004	0	0.02	298.941	0.92	-0.247732
07/23/2011	9	0	0.027	0.035	0	0	0	0	0	0.003	0	0.021	299.898	0.878	-0.39923
07/23/2011	10	0	0.018	0.031	0	0	0	0	0	0.003	0	0.021	299.936	0.855	-0.448654
07/23/2011	11	0	0.011	0.028	0	0	0	0	0	0.004	0	0.023	301.557	0.809	-0.533823
07/23/2011	12	0	0.005	0.026	0	0	0	0	0	0.003	0	0.021	301.822	0.777	-0.590407
07/23/2011	13	0	0.003	0.022	0	0	0	0	0	0.003	0	0.02	302.917	0.752	-0.627652
07/23/2011	14	0	0.001	0.02	0	0	0	0	0	0.002	0	0.017	302.307	0.749	-0.637884
07/23/2011	15	0	0.001	0.015	0	0	0	0	0	0.003	0	0.016	302.819	0.753	-0.616301
07/23/2011	16	0	0.001	0.014	0	0	0	0	0	0.002	0	0.013	301.788	0.779	-0.587124
07/23/2011	17	0	0	0.01	0	0	0	0	0	0.003	0	0.01	301.393	0.796	-0.506715
07/23/2011	18	0	0	0.007	0	0	0	0	0	0.003	0	0.008	300.595	0.828	-0.424868
07/23/2011	19	0	0	0.005	0	0	0	0	0	0.003	0	0.007	300.097	0.854	-0.361526
07/23/2011	20	0	0	0.003	0	0	0	0	0	0.003	0	0.006	299.308	0.877	-0.25618
07/23/2011	21	0	0	0.002	0	0	0	0	0	0.003	0	0.005	298.852	0.892	-0.178217
07/23/2011	22	0	0	0.002	0	0	0	0	0	0.003	0	0.005	298.493	0.905	-0.111512
07/23/2011	23	0	0	0.002	0	0	0	0	0	0.004	0	0.005	298.258	0.91	0.0112421
07/23/2011	24	0	0.001	0.002	0	0	0	0	0	0.004	0	0.006	298.011	0.915	-0.0345962
07/24/2011	1	0.001	0.001	0.002	0	0	0	0	0	0.005	0	0.006	297.77	0.923	0.181907
07/24/2011	2	0.001	0.001	0.002	0	0	0	0	0	0.006	0	0.007	297.531	0.932	0.223676
07/24/2011	3	0.001	0.001	0.002	0	0.001	0	0	0	0.007	0	0.008	297.355	0.938	0.221229
07/24/2011	4	0.001	0.001	0.003	0	0.001	0	0	0	0.008	0	0.009	297.212	0.945	0.291999
07/24/2011	5	0.001	0.002	0.003	0	0.001	0	0	0	0.01	0	0.01	297.073	0.952	0.32855
07/24/2011	6	0.001	0.003	0.003	0	0.001	0	0.001	0	0.011	0	0.011	296.98	0.96	0.45132
07/24/2011	7	0.001	0.006	0.005	0	0.001	0	0.001	0	0.013	0	0.011	297.553	0.955	0.486749
07/24/2011	8	0.001	0.02	0.014	0	0.001	0	0	0	0.01	0	0.013	298.937	0.896	0.00953653
07/24/2011	9	0	0.03	0.022	0	0.001	0	0	0	0.006	0	0.016	299.965	0.852	-0.361135
07/24/2011	10	0	0.018	0.021	0	0	0	0	0	0.005	0	0.019	301.008	0.822	-0.486818
07/24/2011	11	0	0.007	0.016	0	0	0	0	0	0.006	0	0.019	301.837	0.784	-0.531104
07/24/2011	12	0	0.002	0.011	0	0	0	0	0	0.006	0	0.016	302.7	0.757	-0.533597
07/24/2011	13	0	0.001	0.008	0	0	0	0	0	0.005	0	0.014	303.307	0.734	-0.580095
07/24/2011	14	0	0	0.006	0	0	0	0	0	0.004	0	0.012	303.364	0.734	-0.589722
07/24/2011	15	0	0.001	0.005	0	0	0	0	0	0.004	0	0.012	303.088	0.739	-0.577232
07/24/2011	16	0	0.001	0.005	0	0	0	0	0	0.004	0	0.012	303.014	0.732	-0.590294
07/24/2011	17	0	0.001	0.004	0	0	0	0	0	0.004	0	0.012	302.569	0.729	-0.59104
07/24/2011	18	0	0	0.003	0	0	0	0	0	0.005	0	0.012	301.936	0.756	-0.516315
07/24/2011	19	0	0	0.002	0	0	0	0	0	0.006	0	0.011	301.431	0.768	-0.435304
07/24/2011	20	0	0	0.001	0	0	0	0	0	0.007	0	0.01	300.305	0.775	-0.316281
07/24/2011	21	0	0	0.001	0	0	0	0	0	0.007	0	0.009	299.259	0.831	-0.184492
07/24/2011	22	0	0	0.001	0	0	0	0	0	0.006	0	0.009	298.663	0.866	-0.191612
07/24/2011	23	0.001	0	0.001	0	0	0	0	0	0.007	0	0.009	298.353	0.883	-0.0117047
07/24/2011	24	0.001	0	0.001	0	0	0	0	0	0.008	0	0.009	298.15	0.885	0.0921957
07/25/2011	1	0.001	0.001	0.001	0	0	0	0	0	0.01	0	0.009	297.754	0.92	0.339815
07/25/2011	2	0.002	0.001	0.001	0	0	0	0	0	0.013	0	0.01	297.469	0.941	0.651002
07/25/2011	3	0.003	0.001	0.001	0	0.001	0	0	0	0.016	0	0.011	297.251	0.956	0.545286
07/25/2011	4	0.002	0.001	0.001	0	0.001	0	0.001	0.001	0.021	0	0.012	297.097	0.962	1.56503
07/25/2011	5	0.005	0.001	0.001	0.001	0.002	0	0.001	0.001	0.023	0	0.013	297.006	0.961	2.25999
07/25/2011	6	0.007	0.002	0.001	0.001	0.002	0	0.001	0.001	0.025	0	0.015	296.947	0.958	2.25761
07/25/2011	7	0.009	0.003	0.002	0.001	0.003	0	0.001	0.001	0.028	0	0.017	297.642	0.932	2.07331
07/25/2011	8	0.007	0.008	0.006	0.001	0.003	0	0.001	0.002	0.031	0.001	0.02	298.993	0.894	1.71472
07/25/2011	9	0.001	0.02	0.018	0	0.001	0	0.001	0.001	0.022	0	0.02	299.78	0.871	0.0870812
07/25/2011	10	0	0.009	0.015	0	0	0	0	0.001	0.015	0	0.022	300.192	0.858	-0.189618
07/25/2011	11	0	0.004	0.014	0	0	0	0	0	0.012	0	0.021	301.449	0.824	-0.340401
07/25/2011	12	0	0.002	0.014	0	0	0	0	0	0.01	0	0.02	302.05	0.775	-0.445311
07/25/2011	13	0	0.002	0.013	0	0	0	0	0	0.01	0	0.019	302.705	0.744	-0.484297
07/25/2011	14	0	0.002	0.013	0	0	0	0	0	0.01	0	0.019	303.547	0.726	-0.4955
07/25/2011	15	0	0.002	0.012	0	0	0	0	0	0.009	0	0.018	303.156	0.717	-0.52408
07/25/2011	16	0	0.004	0.01	0	0	0	0	0	0.01	0	0.018	303.568	0.721	-0.490073
07/25/2011	17	0	0.005	0.01	0	0	0	0	0	0.009	0	0.018	303.189	0.727	-0.511391
07/25/2011	18	0	0.006	0.008	0	0	0	0	0	0.009	0	0.019	302.858	0.73	-0.526323
07/25/2011	19	0	0.007	0.007	0	0	0	0	0	0.009	0	0.02	302.153	0.743	-0.52683
07/25/2011	20	0	0.005	0.004	0	0	0	0	0	0.011	0	0.021	300.912	0.783	-0.434916
07/25/2011	21	0	0.003	0.002	0.001	0	0	0	0	0.013	0	0.02	300	0.809	-0.321816
07/25/2011	22	0	0.002	0.002	0.001	0	0	0	0	0.013	0	0.018	299.352	0.829	-0.244994
07/25/2011	23	0.001	0.002	0.002	0.001	0	0	0	0	0.014	0	0.017	298.828	0.848	-0.111193
07/25/2011	24	0.001	0.002	0.002	0.001	0	0	0	0	0.015	0	0.016	298.278	0.876	0.00299498
07/26/2011	1	0.001	0.002	0.002	0	0	0	0	0	0.016	0	0.016	297.804	0.901	0.161639
07/26/2011	2	0.001	0.002	0.002	0	0	0	0.001	0	0.019	0	0.016	297.546	0.905	0.192873
07/26/2011	3	0.002	0.002	0.003	0	0	0	0.001	0	0.018	0	0.014	297.296	0.923	0.242863
07/26/2011	4	0.001	0.002	0.003	0	0	0	0.001	0	0.015	0	0.012	297.174	0.932	0.269039
07/26/2011	5	0.001	0.001	0.003	0	0	0	0	0	0.014	0	0.011	297.13	0.934	0.47602
07/26/2011	6	0.001	0.001	0.002	0	0	0	0	0	0.011	0	0.009	297.125	0.937	0.513335
07/26/2011	7	0.001	0.001	0.002	0	0	0	0	0	0.011	0	0.01	297.784	0.936	0.421584
07/26/2011	8	0.001	0.001	0.002	0	0.001	0	0	0.001	0.012	0	0.014	299.267	0.89	0.0489519
07/26/2011	9	0.001	0.002	0.006	0	0.001	0	0	0.001	0.013	0	0.015	300.413	0.865	0.0115948
07/26/2011	10	0.001	0.005	0.008	0	0	0	0	0.001	0.01	0	0.011	301.407	0.838	-0.0616296
07/26/2011	11	0.001	0.005	0.01	0	0	0	0	0.001	0.008	0	0.009	302.171	0.795	-0.122783
07/26/2011	12	0	0.003	0.011	0	0	0	0	0	0.006	0	0.01	303.584	0.752	-0.421562
07/26/2011	13	0	0.002	0.013	0	0	0	0	0	0.006	0	0.012	304.593	0.7	-0.545884
07/26/2011	14	0	0.002	0.015	0	0	0	0	0	0.006	0	0.015	304.495	0.678	-0.619864
07/26/2011	15	0	0.002	0.016	0	0	0	0	0	0.006	0	0.017	304.668	0.67	-0.650972
07/26/2011	16	0	0.002	0.016	0	0	0	0	0	0.007	0	0.019	304.898	0.67	-0.644266
07/26/2011	17	0	0.003	0.016	0	0	0	0	0	0.008	0	0.02	304.839	0.664	-0.64114
07/26/2011	18	0	0.002	0.013	0	0	0	0	0	0.008	0	0.02	304.416	0.662	-0.641751
07/26/2011	19	0	0.001	0.01	0	0	0	0	0	0.008	0	0.018	303.742	0.651	-0.632992
07/26/2011	20	0	0.001	0.006	0	0	0	0	0	0.01	0	0.017	300.912	0.783	-0.39577
07/26/2011	21	0	0.001	0.003	0	0	0	0	0	0.012	0	0.015	300	0.809	-0.189639
07/26/2011	22	0.001	0.001	0.002	0.001	0	0	0	0	0.012	0	0.014	299.352	0.829	-0.111012
07/26/2011	23	0.001	0.001	0.002	0.001	0	0	0	0	0.012	0	0.014	298.828	0.848	-0.0906526
07/26/2011	24	0.001	0.001	0.002	0.001	0	0	0	0	0.012	0	0.014	298.278	0.876	-0.0371661
07/27/2011	1	0.001	0.002	0.002	0	0	0	0.001	0	0.012	0	0.015	297.804	0.901	0.0289863
07/27/2011	2	0.001	0.003	0.002	0	0	0	0.001	0	0.014	0	0.016	297.546	0.905	0.0930088
07/27/2011	3	0.001	0.003	0.002	0	0	0	0.001	0	0.013	0	0.015	297.296	0.923	0.124374
07/27/2011	4	0	0.002	0.003	0	0	0	0.001	0	0.012	0	0.015	297.174	0.932	0.102297
07/27/2011	5	0	0.002	0.003	0	0	0	0.001	0	0.011	0	0.015	297.13	0.934	0.0674483
07/27/2011	6	0	0.001	0.003	0	0	0	0	0	0.01	0	0.014	297.125	0.937	0.0884963
07/27/2011	7	0	0.001	0.002	0	0	0	0	0	0.01	0	0.014	297.784	0.936	0.0912739
07/27/2011	8	0	0.001	0.002	0	0.001	0	0	0	0.011	0	0.016	299.267	0.89	-0.102175
07/27/2011	9	0.001	0.002	0.005	0	0.001	0	0	0.001	0.01	0	0.014	300.413	0.865	-0.0554367
07/27/2011	10	0	0.006	0.007	0	0	0	0	0.001	0.008	0	0.012	301.407	0.838	-0.231837
07/27/2011	11	0	0.005	0.009	0	0	0	0	0	0.008	0	0.012	302.171	0.795	-0.305997
07/27/2011	12	0	0.003	0.011	0	0	0	0	0	0.008	0	0.013	303.584	0.752	-0.410589
07/27/2011	13	0	0.002	0.013	0	0	0	0	0	0.009	0	0.016	304.593	0.7	-0.50794
07/27/2011	14	0	0.002	0.015	0	0	0	0	0	0.01	0	0.019	304.495	0.678	-0.554433
07/27/2011	15	0	0.002	0.017	0	0	0	0	0	0.013	0	0.021	304.668	0.67	-0.502794
07/27/2011	16	0	0.002	0.017	0	0	0	0	0.001	0.014	0	0.023	304.898	0.67	-0.49741
07/27/2011	17	0	0.003	0.017	0	0	0	0	0.001	0.016	0	0.024	304.839	0.664	-0.457566
07/27/2011	18	0	0.002	0.014	0	0	0	0	0.001	0.017	0	0.026	304.416	0.662	-0.471294
07/27/2011	19	0	0.002	0.011	0	0	0	0	0.001	0.017	0	0.024	303.742	0.651	-0.425628
07/27/2011	20	0	0.001	0.006	0	0	0	0	0.001	0.015	0	0.02	300.729	0.877	-0.0986586
07/27/2011	21	0	0.001	0.004	0	0	0	0	0.001	0.013	0	0.021	299.859	0.907	-0.0905323
07/27/2011	22	0	0.001	0.003	0	0	0	0	0.001	0.013	0	0.022	299.776	0.871	-0.224698
07/27/2011	23	0	0.002	0.003	0	0.001	0	0.001	0	0.016	0	0.024	299.31	0.9	-0.0608904
07/27/2011	24	0.001	0.003	0.003	0	0.001	0	0.001	0	0.022	0	0.024	298.747	0.945	0.320793
07/28/2011	1	0.001	0.004	0.002	0	0.001	0	0.001	0	0.026	0	0.024	298.377	0.965	0.591211
07/28/2011	2	0.001	0.004	0.002	0	0.001	0	0.001	0	0.023	0	0.022	298.135	0.967	0.573857
07/28/2011	3	0.001	0.003	0.003	0	0.001	0	0.001	0	0.016	0	0.019	297.932	0.968	0.493844
07/28/2011	4	0	0.003	0.003	0	0.001	0	0	0	0.011	0	0.017	297.77	0.972	0.328903
07/28/2011	5	0	0.002	0.003	0	0.001	0	0	0	0.009	0	0.015	297.693	0.968	0.30843
07/28/2011	6	0	0.002	0.003	0	0.001	0	0	0	0.01	0	0.015	297.619	0.967	0.339864
07/28/2011	7	0.001	0.002	0.004	0	0.001	0	0.001	0	0.014	0	0.016	298.323	0.931	0.200633
07/28/2011	8	0.001	0.004	0.006	0	0.001	0	0	0	0.013	0	0.015	299.412	0.889	0.0273932
07/28/2011	9	0	0.002	0.009	0	0	0	0	0	0.007	0	0.013	299.792	0.851	-0.306746
07/28/2011	10	0	0.001	0.008	0	0	0	0	0	0.007	0	0.013	301.137	0.809	-0.378168
07/28/2011	11	0	0.001	0.008	0	0	0	0	0	0.007	0	0.011	300.833	0.808	-0.317287
07/28/2011	12	0	0	0.007	0	0	0	0	0	0.007	0	0.01	302.844	0.752	-0.344659
07/28/2011	13	0	0	0.008	0	0	0	0	0	0.006	0	0.009	301.648	0.771	-0.351228
07/28/2011	14	0.001	0	0.007	0	0	0	0	0	0.008	0	0.009	303.282	0.746	0.0454943
07/28/2011	15	0.001	0	0.008	0	0	0	0	0	0.007	0	0.008	301.172	0.802	0.0189249
07/28/2011	16	0.001	0	0.006	0	0	0	0	0	0.008	0	0.008	301.453	0.815	0.133622
07/28/2011	17	0.001	0	0.006	0	0	0	0	0	0.008	0	0.009	300.444	0.82	0.0195436
07/28/2011	18	0	0	0.007	0	0	0	0	0	0.007	0	0.009	300.105	0.837	-0.162587
07/28/2011	19	0	0	0.008	0	0	0	0	0	0.005	0	0.009	299.091	0.861	-0.277294
07/28/2011	20	0	0	0.009	0	0	0	0	0	0.004	0	0.01	298.363	0.889	-0.277351
07/28/2011	21	0	0	0.008	0	0	0	0	0	0.004	0	0.01	297.871	0.914	-0.210369
07/28/2011	22	0	0	0.007	0	0	0	0	0	0.003	0	0.01	297.624	0.929	-0.164907
07/28/2011	23	0	0	0.007	0	0	0	0	0	0.002	0	0.01	297.456	0.941	-0.14764
07/28/2011	24	0	0.001	0.008	0	0	0	0	0	0.001	0	0.01	297.296	0.953	-0.115855
07/29/2011	1	0	0	0.007	0	0	0	0	0	0.001	0	0.01	297.124	0.969	0.0795324
07/29/2011	2	0	0.001	0.007	0	0	0	0	0	0.002	0	0.009	297.129	0.968	0.122404
07/29/2011	3	0	0.001	0.007	0	0	0	0	0	0.002	0	0.008	297.234	0.967	0.132956
07/29/2011	4	0	0.002	0.007	0	0	0	0	0	0.003	0	0.01	297.163	0.972	0.152077
07/29/2011	5	0	0.003	0.007	0	0.001	0	0.001	0	0.005	0	0.013	297.079	0.978	0.406612
07/29/2011	6	0	0.003	0.005	0	0.001	0	0.001	0	0.007	0	0.015	297.064	0.979	0.435028
07/29/2011	7	0	0.003	0.006	0	0.001	0	0.001	0	0.01	0	0.017	297.687	0.972	0.330046
07/29/2011	8	0	0.006	0.009	0	0.001	0	0.001	0.001	0.012	0	0.019	299.295	0.903	-0.0477489
07/29/2011	9	0	0.014	0.013	0	0.001	0	0.001	0	0.007	0	0.018	301.01	0.819	-0.381744
07/29/2011	10	0	0.016	0.011	0	0.001	0	0	0	0.004	0	0.011	302.38	0.758	-0.501548
07/29/2011	11	0	0.01	0.008	0	0	0	0	0	0.003	0	0.008	303.561	0.71	-0.596952
07/29/2011	12	0	0.004	0.007	0	0	0	0	0	0.002	0	0.006	304.075	0.68	-0.648433
07/29/2011	13	0	0.001	0.005	0	0	0	0	0	0.002	0	0.006	305.028	0.641	-0.689897
07/29/2011	14	0	0	0.004	0	0	0	0	0	0.002	0	0.005	305.523	0.62	-0.682686
07/29/2011	15	0	0	0.002	0	0	0	0	0	0.004	0	0.005	305.498	0.619	-0.359868
07/29/2011	16	0	0	0.002	0	0	0	0	0	0.004	0	0.004	305.262	0.63	0.155815
07/29/2011	17	0.001	0	0.001	0	0	0	0	0	0.004	0	0.004	305.038	0.637	0.258993
07/29/2011	18	0.001	0	0.001	0	0	0	0	0	0.004	0	0.003	304.665	0.636	-0.0529264
07/29/2011	19	0.001	0	0.001	0	0	0	0	0	0.004	0	0.004	303.503	0.645	0.202507
07/29/2011	20	0.001	0	0.001	0	0	0	0	0	0.005	0	0.004	302.126	0.71	-0.024068
07/29/2011	21	0.001	0	0.001	0	0	0	0	0	0.005	0	0.004	301.293	0.738	0.0130449
07/29/2011	22	0.001	0	0.001	0	0	0	0	0	0.005	0	0.005	300.608	0.77	0.117701
07/29/2011	23	0.001	0	0.001	0	0	0	0	0	0.006	0	0.006	299.927	0.81	0.115488
07/29/2011	24	0.001	0.001	0.001	0	0	0	0	0	0.006	0	0.007	299.273	0.853	0.033542
07/30/2011	1	0.001	0.002	0.001	0	0	0	0	0	0.009	0	0.009	298.654	0.905	0.23087
07/30/2011	2	0.001	0.003	0.001	0	0	0	0	0	0.014	0	0.012	298.232	0.932	0.408597
07/30/2011	3	0.002	0.005	0.002	0	0.001	0	0	0	0.018	0	0.014	298.009	0.937	0.345752
07/30/2011	4	0.002	0.005	0.002	0	0.001	0	0.001	0	0.02	0	0.015	297.87	0.93	0.317408
07/30/2011	5	0.002	0.005	0.002	0.001	0.001	0	0.001	0.001	0.021	0	0.015	297.711	0.934	0.336947
07/30/2011	6	0.003	0.005	0.002	0.001	0.001	0	0.001	0.001	0.022	0	0.014	297.61	0.938	2.10595
07/30/2011	7	0.002	0.005	0.002	0.001	0.001	0	0.001	0.001	0.024	0	0.014	298.188	0.922	2.05625
07/30/2011	8	0.004	0.006	0.003	0.001	0.001	0	0.001	0.001	0.023	0	0.014	299.766	0.89	1.95887
07/30/2011	9	0.004	0.012	0.006	0.001	0.001	0	0.001	0.001	0.023	0	0.013	301.216	0.834	1.75414
07/30/2011	10	0.002	0.053	0.013	0	0	0	0	0.001	0.019	0	0.014	302.597	0.765	-0.24844
07/30/2011	11	0.001	0.077	0.012	0	0	0	0	0	0.011	0	0.013	303.949	0.695	-0.0821184
07/30/2011	12	0	0.059	0.009	0	0	0	0	0	0.007	0	0.01	304.821	0.656	-0.442472
07/30/2011	13	0	0.039	0.008	0	0	0	0	0	0.007	0	0.009	305.487	0.623	-0.392313
07/30/2011	14	0	0.033	0.007	0	0	0	0	0	0.007	0	0.009	306.148	0.606	-0.40155
07/30/2011	15	0	0.026	0.006	0	0	0	0	0	0.006	0	0.009	306.229	0.602	-0.536878
07/30/2011	16	0	0.019	0.006	0	0	0	0	0	0.006	0	0.009	306.24	0.6	-0.536863
07/30/2011	17	0	0.014	0.005	0	0	0	0	0	0.007	0	0.01	305.907	0.603	-0.505374
07/30/2011	18	0	0.009	0.004	0	0	0	0	0	0.009	0	0.01	305.358	0.606	-0.166399
07/30/2011	19	0.001	0.006	0.003	0	0	0	0	0.001	0.012	0	0.01	304.652	0.615	-0.432312
07/30/2011	20	0.002	0.002	0.003	0	0	0	0	0.001	0.011	0	0.008	302.934	0.666	-0.536452
07/30/2011	21	0.003	0.002	0.003	0	0	0	0.001	0.001	0.013	0	0.008	302.024	0.681	-0.144421
07/30/2011	22	0.008	0.003	0.004	0	0	0	0.001	0.001	0.014	0	0.008	301.222	0.709	0.515731
07/30/2011	23	0.015	0.004	0.005	0	0.001	0	0.001	0.001	0.013	0	0.008	300.521	0.748	0.993288
07/30/2011	24	0.02	0.005	0.006	0	0.001	0	0.001	0.001	0.013	0	0.008	299.887	0.793	1.25552
2011-02-08	1	0.001	0.009	0.009	0	0.001	0	0.001	0	0.022	0	0.027	299.51	0.849	-0.0523487
2011-02-08	2	0.001	0.008	0.008	0	0.001	0	0.001	0.001	0.023	0	0.027	299.029	0.884	0.0389627
2011-02-08	3	0.001	0.007	0.007	0	0.001	0	0.002	0.001	0.024	0	0.027	298.68	0.902	0.127915
2011-02-08	4	0.001	0.007	0.006	0	0.001	0	0.002	0.001	0.026	0	0.027	298.376	0.912	0.19208
2011-02-08	5	0.001	0.006	0.006	0	0.001	0	0.002	0.001	0.028	0	0.028	298.099	0.921	0.24114
2011-02-08	6	0.002	0.006	0.006	0	0.001	0	0.002	0.001	0.03	0	0.028	297.865	0.929	0.324626
2011-02-08	7	0.002	0.007	0.006	0	0.002	0	0.002	0.001	0.033	0	0.027	298.237	0.937	0.432942
2011-02-08	8	0.002	0.008	0.01	0	0.002	0	0.002	0.001	0.036	0	0.027	300.209	0.888	0.193745
2011-02-08	9	0.002	0.024	0.014	0	0.002	0	0.002	0.001	0.029	0	0.025	301.818	0.83	0.0212457
2011-02-08	10	0.001	0.041	0.022	0	0.002	0	0.001	0.001	0.022	0	0.024	303.45	0.761	0.00307232
2011-02-08	11	0.001	0.036	0.024	0	0.002	0	0.001	0	0.018	0	0.022	305.134	0.687	-0.0259923
2011-02-08	12	0	0.033	0.025	0	0.001	0	0.001	0	0.014	0	0.021	306.476	0.633	-0.411388
2011-02-08	13	0	0.039	0.026	0	0.001	0	0.001	0	0.012	0	0.022	307.849	0.58	-0.584609
2011-02-08	14	0	0.044	0.026	0	0.001	0	0.001	0	0.011	0	0.023	308.749	0.543	-0.674969
2011-02-08	15	0	0.05	0.027	0	0.001	0	0	0	0.011	0	0.024	309.024	0.525	-0.724419
2011-02-08	16	0	0.051	0.028	0	0.001	0	0	0	0.011	0	0.026	308.665	0.532	-0.743152
2011-02-08	17	0	0.043	0.025	0	0.001	0	0.001	0.001	0.012	0	0.027	308.19	0.541	-0.691239
2011-02-08	18	0	0.042	0.024	0	0.001	0	0.001	0.001	0.014	0	0.031	307.871	0.545	-0.684311
2011-02-08	19	0	0.028	0.024	0	0	0	0.001	0.001	0.013	0	0.034	306.693	0.557	-0.730749
2011-02-08	20	0	0.008	0.018	0	0	0	0.001	0.001	0.012	0	0.033	304.777	0.612	-0.690779
2011-02-08	21	0	0.002	0.012	0	0	0	0.001	0	0.012	0	0.026	303.458	0.668	-0.582533
2011-02-08	22	0	0.001	0.008	0	0	0	0.001	0	0.011	0	0.018	302.445	0.72	-0.415793
2011-02-08	23	0	0	0.005	0	0	0	0	0	0.01	0	0.014	301.521	0.777	-0.298952
2011-02-08	24	0.001	0	0.004	0	0	0	0	0	0.009	0	0.011	300.805	0.834	-0.0533619
2011-03-08	1	0.001	0	0.002	0	0	0	0	0	0.008	0	0.008	300.2	0.891	0.211794
2011-03-08	2	0.001	0	0.002	0	0	0	0	0	0.006	0	0.006	299.835	0.912	0.292534
2011-03-08	3	0.001	0	0.001	0	0	0	0	0	0.006	0	0.005	299.562	0.926	0.536407
2011-03-08	4	0.001	0	0.001	0	0	0	0	0	0.005	0	0.004	299.29	0.948	0.745519
2011-03-08	5	0.002	0	0.001	0	0	0	0	0	0.005	0	0.004	299.175	0.941	0.972373
2011-03-08	6	0.002	0	0.001	0	0	0	0	0	0.006	0	0.004	298.975	0.927	0.591569
2011-03-08	7	0.001	0	0.001	0	0	0	0	0	0.008	0	0.004	299.313	0.913	0.523615
2011-03-08	8	0.001	0	0.002	0	0	0	0	0	0.008	0	0.006	300.887	0.881	0.399707
2011-03-08	9	0.001	0.001	0.004	0	0	0	0	0	0.007	0	0.009	302.589	0.834	-0.0570418
2011-03-08	10	0.001	0.005	0.006	0	0.001	0	0	0	0.01	0	0.012	304.381	0.759	-0.114217
2011-03-08	11	0.001	0.012	0.007	0	0.001	0	0	0.001	0.013	0	0.015	306.435	0.651	-0.0520875
2011-03-08	12	0.001	0.025	0.01	0	0.001	0	0	0.001	0.016	0	0.016	307.588	0.594	-0.11536
2011-03-08	13	0.001	0.025	0.011	0	0	0	0	0	0.017	0	0.016	308.644	0.558	0.566377
2011-03-08	14	0.001	0.026	0.011	0	0	0	0	0	0.017	0	0.016	309.182	0.54	0.627074
2011-03-08	15	0.001	0.023	0.01	0	0	0	0	0	0.018	0	0.016	308.986	0.538	0.572456
2011-03-08	16	0.001	0.019	0.008	0	0	0	0	0	0.02	0	0.016	308.668	0.536	0.373429
2011-03-08	17	0.002	0.02	0.007	0	0.001	0	0.001	0	0.021	0	0.016	307.926	0.54	-0.508928
2011-03-08	18	0.003	0.02	0.006	0.001	0.001	0	0.001	0	0.023	0	0.016	306.856	0.571	-0.55809
2011-03-08	19	0.004	0.014	0.004	0.001	0.001	0	0.001	0	0.023	0	0.015	305.441	0.664	-0.432402
2011-03-08	20	0.004	0.008	0.003	0.001	0.001	0	0.001	0	0.022	0	0.014	303.787	0.683	1.82119
2011-03-08	21	0.003	0.004	0.002	0.001	0.001	0	0.001	0	0.019	0	0.013	303.133	0.686	-0.377022
2011-03-08	22	0.002	0.002	0.001	0.001	0.001	0	0.001	0	0.015	0	0.011	302.415	0.718	-0.342847
2011-03-08	23	0.002	0.002	0.001	0.001	0.001	0	0.001	0	0.013	0	0.01	301.912	0.752	-0.295917
2011-03-08	24	0.002	0.001	0.001	0.001	0.001	0	0.001	0	0.012	0	0.01	301.385	0.793	-0.202467
2011-04-08	1	0.002	0.001	0.001	0.001	0.002	0	0.001	0	0.012	0	0.01	300.819	0.838	-0.0866377
2011-04-08	2	0.002	0.002	0.001	0.001	0.002	0	0.001	0	0.012	0	0.01	300.28	0.87	0.0023232
2011-04-08	3	0.002	0.005	0.001	0.001	0.003	0	0.001	0	0.012	0	0.011	299.98	0.87	0.030367
2011-04-08	4	0.002	0.008	0.002	0.001	0.004	0	0.001	0	0.013	0	0.012	299.643	0.863	0.0244602
2011-04-08	5	0.002	0.011	0.002	0.001	0.005	0	0.001	0.001	0.015	0	0.014	299.436	0.861	0.0515955
2011-04-08	6	0.002	0.015	0.002	0.001	0.006	0	0.001	0.001	0.017	0	0.016	299.161	0.854	0.046932
2011-04-08	7	0.002	0.02	0.003	0.001	0.006	0	0.001	0.001	0.02	0	0.018	299.262	0.847	0.0538879
2011-04-08	8	0.001	0.04	0.01	0.001	0.006	0	0.001	0.001	0.021	0	0.022	300.59	0.809	-0.00842837
2011-04-08	9	0.001	0.084	0.027	0	0.004	0	0.001	0.001	0.019	0	0.024	301.925	0.773	-0.00523661
2011-04-08	10	0.001	0.082	0.029	0	0.002	0	0.001	0.001	0.016	0	0.019	303.17	0.738	-0.0159048
2011-04-08	11	0.001	0.061	0.023	0	0.001	0	0.001	0.001	0.016	0	0.016	304.426	0.702	-0.109665
2011-04-08	12	0.001	0.041	0.02	0	0.001	0	0	0.001	0.016	0	0.014	305.412	0.676	-0.265953
2011-04-08	13	0.001	0.033	0.019	0	0.001	0	0	0.001	0.017	0	0.015	306.128	0.655	-0.24971
2011-04-08	14	0.001	0.026	0.019	0	0.001	0	0.001	0.001	0.017	0	0.015	306.103	0.656	-0.282329
2011-04-08	15	0.002	0.026	0.022	0	0.001	0	0.001	0.001	0.018	0	0.015	305.629	0.666	-0.373372
2011-04-08	16	0.002	0.031	0.028	0	0.001	0	0.001	0.002	0.019	0	0.017	304.953	0.681	-0.329368
2011-04-08	17	0.002	0.042	0.033	0	0.001	0	0.001	0.002	0.02	0	0.019	303.997	0.7	-0.200433
2011-04-08	18	0.001	0.065	0.034	0	0.001	0	0.001	0.003	0.022	0	0.022	302.844	0.723	-0.10191
2011-04-08	19	0.001	0.103	0.034	0	0.002	0.001	0.002	0.004	0.024	0	0.026	301.567	0.751	-0.0472681
2011-04-08	20	0.001	0.133	0.027	0	0.002	0.001	0.002	0.004	0.028	0	0.03	300.67	0.766	0.00726999
2011-04-08	21	0.001	0.151	0.02	0.001	0.002	0.001	0.002	0.005	0.031	0	0.033	300.1	0.782	0.0151538
2011-04-08	22	0.002	0.155	0.019	0.001	0.002	0.001	0.003	0.006	0.035	0.001	0.035	299.657	0.807	0.0309378
2011-04-08	23	0.002	0.148	0.019	0	0.003	0.001	0.003	0.008	0.037	0.001	0.036	299.449	0.823	0.044147
2011-04-08	24	0.003	0.144	0.019	0	0.003	0.001	0.004	0.009	0.039	0.001	0.037	299.257	0.839	0.114244
2011-05-08	1	0.003	0.146	0.02	0	0.003	0.002	0.004	0.01	0.04	0.001	0.038	299.07	0.853	0.162829
2011-05-08	2	0.003	0.155	0.019	0	0.004	0.002	0.004	0.011	0.04	0.001	0.04	298.858	0.867	0.237207
2011-05-08	3	0.003	0.178	0.018	0	0.004	0.002	0.005	0.011	0.041	0.001	0.042	298.655	0.877	0.272129
2011-05-08	4	0.002	0.239	0.023	0	0.004	0.002	0.005	0.011	0.043	0.001	0.046	298.452	0.886	0.285316
2011-05-08	5	0.002	0.273	0.02	0	0.004	0.002	0.005	0.011	0.045	0.001	0.05	298.248	0.894	0.276715
2011-05-08	6	0.002	0.303	0.02	0	0.004	0.002	0.005	0.011	0.048	0.001	0.054	298.058	0.901	0.302759
2011-05-08	7	0.002	0.314	0.02	0	0.005	0.002	0.005	0.012	0.052	0.001	0.057	298.359	0.908	0.351606
2011-05-08	8	0.002	0.368	0.03	0	0.005	0.002	0.005	0.012	0.056	0.001	0.061	299.828	0.857	0.197394
2011-05-08	9	0.001	0.614	0.069	0	0.005	0.001	0.004	0.008	0.056	0	0.066	301.269	0.799	0.10323
2011-05-08	10	0.001	0.56	0.069	0	0.003	0.001	0.003	0.005	0.051	0	0.062	302.866	0.729	0.080132
2011-05-08	11	0	0.455	0.065	0	0.002	0.001	0.002	0.004	0.044	0	0.057	304.108	0.684	-0.0542252
2011-05-08	12	0	0.355	0.056	0	0.001	0	0.001	0.003	0.037	0	0.051	305.296	0.641	-0.328993
2011-05-08	13	0	0.264	0.047	0	0.001	0	0.001	0.003	0.031	0	0.045	306.382	0.603	-0.405697
2011-05-08	14	0	0.226	0.041	0	0.001	0	0.001	0.003	0.029	0	0.043	306.868	0.583	-0.440665
2011-05-08	15	0	0.185	0.037	0	0.001	0	0.001	0.002	0.028	0	0.041	306.657	0.58	-0.448625
2011-05-08	16	0	0.143	0.033	0	0.001	0	0.001	0.002	0.026	0	0.039	306.036	0.591	-0.454907
2011-05-08	17	0	0.116	0.029	0	0.001	0	0.001	0.002	0.026	0	0.038	305.036	0.611	-0.408805
2011-05-08	18	0	0.102	0.023	0	0.001	0	0.001	0.003	0.027	0	0.038	303.78	0.638	-0.308828
2011-05-08	19	0	0.093	0.018	0	0.001	0.001	0.001	0.003	0.028	0	0.038	302.379	0.684	-0.123442
2011-05-08	20	0	0.087	0.015	0.001	0.001	0.001	0.002	0.004	0.03	0	0.041	301.387	0.689	-0.060665
2011-05-08	21	0	0.096	0.014	0.001	0.001	0.001	0.002	0.005	0.032	0	0.044	300.648	0.71	-0.0615145
2011-05-08	22	0	0.096	0.013	0.001	0.001	0.001	0.003	0.006	0.034	0.001	0.046	299.971	0.738	0.00713173
2011-05-08	23	0.001	0.088	0.013	0.001	0.001	0.001	0.003	0.006	0.036	0.001	0.048	299.527	0.756	0.0207924
2011-05-08	24	0.001	0.085	0.013	0	0.001	0.001	0.004	0.007	0.038	0.001	0.048	299.065	0.78	0.0756474
2011-06-08	1	0.001	0.085	0.014	0	0.002	0.001	0.004	0.008	0.039	0.001	0.049	298.582	0.81	0.0801532
2011-06-08	2	0.001	0.083	0.014	0	0.002	0.002	0.005	0.009	0.041	0.001	0.049	298.222	0.83	0.134724
2011-06-08	3	0.001	0.079	0.013	0	0.002	0.002	0.005	0.01	0.042	0.001	0.049	298.018	0.84	0.147521
2011-06-08	4	0.001	0.075	0.012	0	0.003	0.002	0.005	0.01	0.043	0.001	0.049	297.911	0.844	0.146379
2011-06-08	5	0.002	0.071	0.012	0	0.003	0.002	0.005	0.011	0.045	0.001	0.049	297.87	0.845	0.166038
2011-06-08	6	0.002	0.069	0.012	0	0.003	0.002	0.006	0.011	0.046	0.001	0.049	297.87	0.846	0.1763
2011-06-08	7	0.003	0.064	0.011	0	0.003	0.002	0.006	0.012	0.049	0.001	0.049	298.301	0.858	0.224488
2011-06-08	8	0.003	0.056	0.012	0	0.003	0.002	0.006	0.012	0.05	0.001	0.048	300.442	0.805	0.0887445
2011-06-08	9	0.001	0.119	0.061	0	0.003	0.001	0.004	0.007	0.042	0.001	0.046	302.128	0.743	0.0353409
2011-06-08	10	0.001	0.18	0.077	0	0.003	0.001	0.002	0.005	0.034	0	0.044	303.925	0.68	0.108195
2011-06-08	11	0	0.192	0.07	0	0.002	0.001	0.002	0.004	0.028	0	0.044	305.522	0.626	-0.256452
2011-06-08	12	0	0.116	0.058	0	0.001	0	0.001	0.003	0.023	0	0.048	306.442	0.596	-0.620959
2011-06-08	13	0	0.026	0.037	0	0.001	0	0.001	0.002	0.017	0	0.045	306.467	0.581	-0.70297
2011-06-08	14	0	0.003	0.019	0	0	0	0.001	0.002	0.014	0	0.036	306.563	0.588	-0.693353
2011-06-08	15	0	0.001	0.013	0	0	0	0.001	0.001	0.012	0	0.028	306.039	0.613	-0.653872
2011-06-08	16	0	0.001	0.009	0	0	0	0	0.001	0.009	0	0.021	305.683	0.635	-0.642114
2011-06-08	17	0	0	0.006	0	0	0	0	0.001	0.007	0	0.016	305.036	0.668	-0.604032
2011-06-08	18	0	0	0.004	0	0	0	0	0	0.006	0	0.012	304.007	0.717	-0.522391
2011-06-08	19	0	0	0.004	0	0	0	0	0	0.007	0	0.011	302.576	0.77	-0.371265
2011-06-08	20	0.001	0	0.004	0	0	0	0	0	0.007	0	0.009	301.158	0.852	-0.0415975
2011-06-08	21	0.001	0.001	0.004	0	0	0	0.001	0.001	0.01	0	0.012	300.372	0.886	0.0513246
2011-06-08	22	0.001	0.001	0.006	0	0	0	0.001	0.001	0.013	0	0.017	299.908	0.889	0.0122518
2011-06-08	23	0.001	0.002	0.006	0.001	0	0	0.001	0.002	0.016	0	0.022	299.548	0.893	-0.00173467
2011-06-08	24	0.001	0.002	0.006	0.001	0.001	0	0.001	0.002	0.019	0	0.026	299.275	0.893	0.0129518
2011-07-08	1	0.001	0.004	0.006	0.001	0.001	0.001	0.002	0.003	0.021	0	0.03	298.987	0.899	0.102896
2011-07-08	2	0.001	0.005	0.006	0.001	0.001	0.001	0.002	0.003	0.024	0	0.033	298.762	0.903	0.103438
2011-07-08	3	0.001	0.006	0.006	0.001	0.001	0.001	0.002	0.004	0.026	0	0.035	298.544	0.918	0.200895
2011-07-08	4	0.001	0.007	0.005	0.001	0.001	0.001	0.002	0.004	0.027	0	0.035	298.518	0.912	0.166881
2011-07-08	5	0.001	0.007	0.005	0.001	0.001	0.001	0.002	0.004	0.028	0	0.034	298.476	0.912	0.200717
2011-07-08	6	0.001	0.006	0.004	0.001	0.002	0.001	0.002	0.004	0.029	0	0.033	298.297	0.934	0.322426
2011-07-08	7	0.002	0.006	0.003	0.001	0.002	0.001	0.002	0.004	0.031	0	0.032	298.733	0.93	0.369043
2011-07-08	8	0.002	0.007	0.004	0.001	0.003	0.001	0.002	0.004	0.033	0	0.032	300.257	0.894	0.216647
2011-07-08	9	0.002	0.016	0.012	0.001	0.003	0.001	0.002	0.004	0.03	0	0.029	301.469	0.865	0.136341
2011-07-08	10	0.001	0.022	0.019	0	0.002	0	0.001	0.003	0.022	0	0.025	302.842	0.812	0.0173545
2011-07-08	11	0	0.021	0.021	0	0.001	0	0.001	0.002	0.014	0	0.021	303.953	0.772	-0.19831
2011-07-08	12	0	0.013	0.019	0	0.001	0	0.001	0.001	0.012	0	0.02	304.653	0.736	-0.328814
2011-07-08	13	0	0.007	0.017	0	0	0	0.001	0.001	0.013	0	0.021	304.552	0.715	-0.385133
2011-07-08	14	0	0.006	0.015	0	0	0	0.001	0.001	0.015	0	0.021	305.829	0.694	-0.312223
2011-07-08	15	0	0.005	0.018	0	0	0	0.001	0.001	0.015	0	0.021	305.934	0.681	-0.32096
2011-07-08	16	0	0.004	0.017	0	0	0	0.001	0.001	0.016	0	0.021	305.838	0.67	-0.260749
2011-07-08	17	0.001	0.003	0.012	0	0	0	0.001	0.001	0.016	0	0.019	305.286	0.666	-0.0293158
2011-07-08	18	0.001	0.002	0.007	0	0	0	0.001	0.001	0.016	0	0.016	304.521	0.68	-0.0695677
2011-07-08	19	0.003	0.002	0.003	0.001	0	0	0.001	0.002	0.017	0	0.014	303.792	0.699	-0.392636
2011-07-08	20	0.004	0.001	0.002	0.001	0	0	0.001	0.002	0.016	0	0.012	302.802	0.694	-0.387179
2011-07-08	21	0.004	0.002	0.002	0.001	0.001	0	0.001	0.002	0.016	0	0.011	301.632	0.74	1.877
2011-07-08	22	0.006	0.002	0.002	0.001	0.001	0	0.001	0.002	0.016	0	0.011	301.271	0.729	1.84901
2011-07-08	23	0.007	0.002	0.002	0.001	0.001	0	0.001	0.001	0.015	0	0.01	300.349	0.794	1.88329
2011-07-08	24	0.006	0.002	0.002	0.001	0.002	0	0.001	0.001	0.014	0	0.01	299.742	0.837	1.93426
2011-08-08	1	0.005	0.003	0.001	0.001	0.002	0	0.001	0.001	0.014	0	0.009	299.202	0.858	2.07357
2011-08-08	2	0.004	0.003	0.001	0.001	0.003	0	0.001	0.001	0.014	0	0.01	298.545	0.893	2.08986
2011-08-08	3	0.003	0.005	0.001	0.001	0.003	0	0.001	0.001	0.014	0	0.01	298.143	0.914	2.14115
2011-08-08	4	0.003	0.007	0.002	0.001	0.004	0	0.001	0.001	0.015	0	0.011	297.899	0.931	2.07518
2011-08-08	5	0.004	0.007	0.002	0.001	0.004	0	0.001	0.001	0.015	0	0.011	297.868	0.923	2.04205
2011-08-08	6	0.005	0.008	0.002	0.001	0.005	0	0.001	0.001	0.015	0	0.012	297.721	0.93	2.06874
2011-08-08	7	0.007	0.009	0.002	0.001	0.005	0	0.001	0.002	0.015	0	0.013	298.013	0.937	2.11523
2011-08-08	8	0.004	0.021	0.006	0.001	0.005	0	0.001	0.003	0.018	0.001	0.015	299.844	0.873	1.7345
2011-08-08	9	0.002	0.061	0.02	0.001	0.004	0	0.001	0.003	0.016	0.001	0.017	301.401	0.819	-0.079259
2011-08-08	10	0.001	0.073	0.031	0	0.002	0	0.001	0.002	0.012	0	0.014	302.903	0.762	-0.121235
2011-08-08	11	0.001	0.053	0.029	0	0.001	0	0.001	0.002	0.011	0	0.014	304.312	0.709	-0.0729126
2011-08-08	12	0.001	0.034	0.026	0	0.001	0	0.001	0.002	0.012	0	0.014	305.5	0.668	-0.139741
2011-08-08	13	0.001	0.023	0.024	0	0.001	0	0.001	0.002	0.013	0	0.015	306.651	0.631	-0.129663
2011-08-08	14	0.001	0.018	0.023	0	0	0	0.001	0.001	0.014	0	0.015	306.99	0.617	-0.0510814
2011-08-08	15	0.001	0.012	0.02	0	0	0	0.001	0.001	0.016	0	0.015	306.45	0.619	-0.17711
2011-08-08	16	0.001	0.007	0.017	0	0	0	0.001	0.001	0.015	0	0.014	305.416	0.637	-0.192673
2011-08-08	17	0.001	0.005	0.013	0	0	0	0	0.001	0.014	0	0.013	304.205	0.664	-0.169475
2011-08-08	18	0.001	0.003	0.01	0	0	0	0	0.001	0.012	0	0.013	303.455	0.681	-0.0671014
2011-08-08	19	0.001	0.003	0.009	0	0	0	0.001	0.001	0.013	0	0.013	302.562	0.704	-0.113986
2011-08-08	20	0.001	0.002	0.008	0	0	0	0.001	0.002	0.014	0	0.013	301.092	0.738	-0.22863
2011-08-08	21	0.001	0.002	0.007	0	0	0	0.001	0.002	0.014	0	0.013	300.043	0.781	-0.16708
2011-08-08	22	0.002	0.002	0.005	0	0	0	0.001	0.002	0.014	0	0.012	299.375	0.812	-0.162242
2011-08-08	23	0.002	0.002	0.003	0.001	0.001	0	0.001	0.002	0.012	0	0.011	298.949	0.829	-0.0998604
2011-08-08	24	0.002	0.001	0.002	0.001	0.001	0	0.001	0.002	0.01	0	0.009	298.661	0.845	-0.0756926
2011-09-08	1	0.002	0.001	0.001	0.001	0.001	0	0.001	0.001	0.009	0	0.007	298.383	0.865	0.00110331
2011-09-08	2	0.002	0.001	0.001	0.001	0.001	0	0.001	0.001	0.008	0	0.006	298.233	0.875	2.08489
2011-09-08	3	0.002	0.002	0.001	0.001	0.001	0	0.001	0.001	0.009	0	0.006	298.127	0.884	2.08492
2011-09-08	4	0.002	0.004	0.001	0.001	0.002	0	0.001	0.001	0.011	0	0.008	297.988	0.895	2.11435
2011-09-08	5	0.002	0.01	0.004	0.001	0.003	0	0.001	0.001	0.014	0	0.011	297.865	0.905	0.220857
2011-09-08	6	0.002	0.017	0.007	0.001	0.004	0	0.001	0.001	0.016	0	0.014	297.741	0.916	0.29488
2011-09-08	7	0.002	0.022	0.013	0.001	0.004	0	0.001	0.002	0.019	0	0.016	298.075	0.911	0.258405
2011-09-08	8	0.003	0.031	0.024	0.001	0.004	0	0.002	0.002	0.02	0.001	0.017	299.717	0.866	0.108149
2011-09-08	9	0.004	0.063	0.045	0.001	0.003	0	0.002	0.002	0.022	0.002	0.016	301.327	0.812	1.29655
2011-09-08	10	0.003	0.067	0.036	0.001	0.002	0	0.001	0.002	0.018	0.001	0.012	302.599	0.766	1.33652
2011-09-08	11	0.002	0.042	0.022	0	0.001	0	0.001	0.001	0.011	0.001	0.008	303.925	0.72	-0.412733
2011-09-08	12	0.001	0.017	0.015	0	0.001	0	0.001	0.001	0.01	0.001	0.009	303.387	0.728	-0.35674
2011-09-08	13	0.001	0.005	0.009	0.001	0	0	0	0.001	0.008	0	0.009	303.569	0.721	-0.14875
2011-09-08	14	0.001	0.003	0.008	0.001	0	0	0	0.001	0.009	0	0.01	303.536	0.724	-0.127693
2011-09-08	15	0.001	0.002	0.008	0.001	0	0	0	0.001	0.011	0	0.012	303.233	0.728	-0.0973094
2011-09-08	16	0.001	0.002	0.008	0.001	0	0	0	0.001	0.012	0	0.013	303.016	0.724	-0.0822421
2011-09-08	17	0.001	0.002	0.008	0.001	0	0	0.001	0.001	0.016	0	0.015	302.619	0.72	-0.11579
2011-09-08	18	0.001	0.002	0.008	0.001	0	0	0.001	0.001	0.018	0	0.017	301.668	0.736	-0.0688169
2011-09-08	19	0.001	0.001	0.006	0.001	0	0	0.001	0.001	0.019	0	0.017	300.555	0.813	-0.034978
2011-09-08	20	0.002	0.001	0.004	0.001	0	0	0.001	0.001	0.021	0	0.018	299.555	0.857	0.0457165
2011-09-08	21	0.002	0.001	0.003	0.001	0	0	0.001	0.001	0.021	0	0.018	298.949	0.873	0.0771735
2011-09-08	22	0.002	0.001	0.002	0.001	0	0	0.001	0.001	0.021	0	0.017	298.611	0.871	0.0662971
2011-09-08	23	0.002	0.001	0.002	0.001	0.001	0	0.001	0.001	0.019	0	0.015	298.206	0.902	0.166211
2011-09-08	24	0.002	0.001	0.001	0.001	0.001	0	0.001	0.001	0.019	0	0.013	297.98	0.913	0.214552
2011-10-08	1	0.003	0	0.001	0	0.001	0	0.001	0.001	0.017	0	0.011	297.63	0.943	1.31289
2011-10-08	2	0.002	0	0.001	0	0.001	0	0.001	0	0.016	0	0.01	297.377	0.958	1.52306
2011-10-08	3	0.002	0.001	0.001	0	0.001	0	0.001	0	0.015	0	0.009	297.17	0.972	1.60511
2011-10-08	4	0.003	0.001	0.001	0	0.001	0	0.001	0	0.013	0	0.008	297.055	0.98	1.7195
2011-10-08	5	0.004	0.001	0.001	0	0.002	0	0.001	0	0.012	0	0.008	296.967	0.986	1.989
2011-10-08	6	0.004	0.001	0.001	0	0.002	0	0.001	0	0.012	0	0.008	296.875	0.99	1.98809
2011-10-08	7	0.006	0.001	0.001	0	0.002	0	0.001	0	0.011	0	0.008	297.211	0.99	1.99233
2011-10-08	8	0.007	0.003	0.003	0	0.002	0	0.001	0.001	0.01	0	0.008	298.613	0.961	1.39215
2011-10-08	9	0.004	0.018	0.007	0	0.004	0	0.001	0.001	0.01	0	0.008	300.461	0.891	0.345381
2011-10-08	10	0.001	0.069	0.015	0	0.004	0	0.001	0.001	0.01	0	0.011	302.179	0.817	-0.109214
2011-10-08	11	0	0.072	0.017	0	0.002	0	0.001	0.001	0.012	0	0.018	303.292	0.767	-0.160547
2011-10-08	12	0	0.036	0.015	0	0.001	0	0	0.001	0.011	0	0.023	304.192	0.727	-0.487943
2011-10-08	13	0	0.02	0.014	0	0.001	0	0	0.001	0.01	0	0.023	305.62	0.674	-0.582932
2011-10-08	14	0	0.02	0.014	0	0.001	0	0	0.001	0.01	0	0.022	306.207	0.653	-0.590783
2011-10-08	15	0	0.021	0.013	0	0.001	0	0	0.001	0.01	0	0.021	305.595	0.664	-0.565243
2011-10-08	16	0	0.019	0.01	0	0.001	0	0	0.001	0.01	0	0.021	304.515	0.696	-0.521564
2011-10-08	17	0	0.015	0.008	0	0.001	0	0	0.001	0.011	0	0.02	302.946	0.742	-0.422833
2011-10-08	18	0	0.014	0.006	0	0.001	0	0	0.001	0.011	0	0.019	301.745	0.791	-0.33562
2011-10-08	19	0	0.013	0.006	0	0.001	0	0	0.001	0.012	0	0.019	300.381	0.846	-0.205099
2011-10-08	20	0	0.013	0.005	0	0.001	0	0	0.001	0.012	0	0.019	299.421	0.884	-0.142078
2011-10-08	21	0	0.008	0.004	0	0.001	0	0.001	0.001	0.013	0	0.018	298.828	0.903	0.00757138
2011-10-08	22	0.001	0.005	0.003	0	0.001	0	0.001	0.001	0.013	0	0.018	298.38	0.912	0.0699449
2011-10-08	23	0.001	0.003	0.002	0	0.001	0	0.001	0.001	0.014	0	0.016	297.902	0.922	0.183227
2011-10-08	24	0.001	0.002	0.002	0	0.001	0	0.001	0.001	0.014	0	0.015	297.452	0.931	0.249879
2011-11-08	1	0.001	0.002	0.002	0	0.001	0	0.001	0.001	0.015	0	0.014	297.046	0.94	0.341444
2011-11-08	2	0.002	0.003	0.002	0	0.001	0	0.001	0.001	0.017	0	0.014	296.767	0.945	0.454038
2011-11-08	3	0.002	0.004	0.002	0	0.001	0	0.001	0.001	0.019	0	0.013	296.661	0.945	0.482742
2011-11-08	4	0.002	0.004	0.002	0	0.001	0	0.001	0.001	0.02	0	0.012	296.625	0.945	1.10309
2011-11-08	5	0.004	0.004	0.002	0	0.001	0	0.001	0.001	0.02	0	0.012	296.591	0.947	1.21327
2011-11-08	6	0.005	0.004	0.002	0	0.001	0	0.001	0.001	0.019	0	0.012	296.587	0.946	1.21338
2011-11-08	7	0.003	0.003	0.001	0.001	0.001	0	0.001	0.001	0.018	0	0.011	296.754	0.948	2.21653
2011-11-08	8	0.002	0.005	0.002	0.001	0.002	0	0.001	0.001	0.016	0	0.012	297.918	0.93	0.317503
2011-11-08	9	0.001	0.011	0.005	0	0.002	0	0.001	0.001	0.015	0	0.017	299.1	0.896	0.139933
2011-11-08	10	0.001	0.009	0.007	0	0.002	0	0.001	0.001	0.016	0	0.02	300.206	0.848	0.0123312
2011-11-08	11	0.001	0.011	0.012	0	0.001	0	0.001	0.001	0.019	0	0.019	301.322	0.79	-0.0198766
2011-11-08	12	0.002	0.01	0.012	0	0.001	0	0	0.001	0.021	0	0.016	302.353	0.734	-0.289659
2011-11-08	13	0.003	0.008	0.011	0	0.001	0	0	0.001	0.02	0	0.013	303.014	0.693	-0.389439
2011-11-08	14	0.002	0.006	0.009	0	0.001	0	0	0.001	0.02	0	0.011	303.209	0.677	-0.582139
2011-11-08	15	0.003	0.006	0.008	0	0.001	0	0	0.001	0.019	0	0.01	303.173	0.67	-0.343347
2011-11-08	16	0.004	0.007	0.007	0	0.001	0	0	0.001	0.017	0	0.01	303.106	0.664	-0.390018
2011-11-08	17	0.006	0.007	0.006	0	0.001	0	0	0.001	0.016	0	0.009	302.811	0.662	0.057484
2011-11-08	18	0.008	0.007	0.005	0	0.001	0	0.001	0.001	0.015	0	0.009	302.4	0.663	0.365863
2011-11-08	19	0.008	0.006	0.003	0.001	0.001	0	0.001	0.001	0.014	0	0.008	301.766	0.686	1.75803
2011-11-08	20	0.01	0.006	0.003	0.001	0.001	0	0.001	0.001	0.013	0	0.008	300.816	0.684	1.70347
2011-11-08	21	0.012	0.006	0.003	0.001	0.001	0	0.001	0.001	0.013	0	0.008	299.975	0.695	1.68607
2011-11-08	22	0.014	0.006	0.003	0.001	0.001	0	0.001	0.001	0.013	0	0.008	299.264	0.719	1.6763
2011-11-08	23	0.017	0.007	0.004	0.001	0.001	0	0.001	0.001	0.012	0	0.008	298.61	0.753	1.60243
2011-11-08	24	0.02	0.009	0.004	0	0.001	0	0.001	0.001	0.012	0	0.008	297.992	0.794	1.27863
2011-12-08	1	0.022	0.01	0.004	0	0.001	0	0.001	0.001	0.011	0	0.008	297.389	0.838	1.4564
2011-12-08	2	0.022	0.01	0.004	0	0.001	0	0.001	0.001	0.011	0	0.008	296.951	0.869	1.56444
2011-12-08	3	0.022	0.009	0.005	0	0.001	0	0.002	0.001	0.011	0	0.008	296.69	0.885	1.71893
2011-12-08	4	0.021	0.009	0.005	0	0.001	0	0.002	0.001	0.01	0	0.007	296.502	0.897	1.79617
2011-12-08	5	0.021	0.008	0.006	0	0.001	0	0.002	0.001	0.01	0	0.007	296.339	0.908	1.82991
2011-12-08	6	0.02	0.008	0.005	0	0.001	0	0.002	0.001	0.01	0	0.007	296.187	0.922	1.87304
2011-12-08	7	0.018	0.008	0.004	0	0.001	0	0.002	0.002	0.008	0	0.007	296.435	0.932	1.91111
2011-12-08	8	0.013	0.01	0.005	0	0.001	0.001	0.002	0.003	0.007	0	0.008	298.082	0.888	1.6265
2011-12-08	9	0.01	0.027	0.015	0	0.001	0	0.002	0.003	0.009	0.001	0.009	299.937	0.824	-0.249212
2011-12-08	10	0.007	0.043	0.017	0	0.001	0	0.001	0.002	0.013	0	0.01	301.568	0.763	-0.731761
2011-12-08	11	0.004	0.057	0.015	0	0.001	0	0.001	0.001	0.015	0	0.01	303.268	0.689	-0.937061
2011-12-08	12	0.002	0.076	0.015	0	0.001	0	0.001	0.001	0.014	0	0.011	304.431	0.645	-0.494076
2011-12-08	13	0.001	0.076	0.015	0	0.001	0	0.001	0.001	0.014	0	0.012	305.392	0.61	-0.46146
2011-12-08	14	0.001	0.06	0.016	0	0.001	0	0.001	0.001	0.016	0	0.017	305.789	0.599	-0.0440889
2011-12-08	15	0.001	0.039	0.017	0	0.001	0	0.001	0.002	0.019	0	0.022	305.672	0.603	0.0606074
2011-12-08	16	0	0.026	0.017	0	0.001	0	0.001	0.002	0.022	0	0.027	305.495	0.609	-0.0489234
2011-12-08	17	0	0.018	0.016	0	0.001	0	0.001	0.002	0.024	0	0.03	305.018	0.621	-0.123418
2011-12-08	18	0.001	0.014	0.013	0	0.001	0	0.001	0.003	0.025	0	0.03	304.382	0.634	0.076761
2011-12-08	19	0.001	0.011	0.011	0	0.001	0.001	0.001	0.003	0.027	0	0.031	303.482	0.661	0.0800301
2011-12-08	20	0.001	0.008	0.008	0	0.001	0.001	0.002	0.004	0.03	0	0.031	302.32	0.672	-0.0426021
2011-12-08	21	0.002	0.008	0.007	0	0.001	0.001	0.002	0.005	0.033	0	0.031	301.372	0.689	-0.194434
2011-12-08	22	0.003	0.009	0.008	0	0.001	0.001	0.003	0.006	0.035	0	0.031	300.565	0.714	-0.180923
2011-12-08	23	0.003	0.009	0.009	0	0.001	0.001	0.003	0.007	0.035	0	0.031	299.77	0.751	-0.0997436
2011-12-08	24	0.003	0.009	0.009	0	0.001	0.001	0.003	0.007	0.035	0	0.03	298.997	0.797	0.0252807
08/13/2011	1	0.004	0.01	0.008	0	0.001	0.001	0.003	0.008	0.035	0	0.03	298.272	0.846	0.146464
08/13/2011	2	0.004	0.011	0.006	0	0.001	0.001	0.004	0.008	0.036	0	0.029	297.744	0.877	0.28759
08/13/2011	3	0.004	0.011	0.005	0	0.001	0.001	0.004	0.008	0.037	0	0.029	297.432	0.89	0.340431
08/13/2011	4	0.005	0.012	0.005	0	0.001	0.001	0.004	0.008	0.038	0	0.029	297.221	0.896	0.400872
08/13/2011	5	0.005	0.012	0.005	0	0.001	0.001	0.004	0.008	0.038	0.001	0.028	297.051	0.9	1.17141
08/13/2011	6	0.01	0.013	0.005	0	0.001	0.001	0.004	0.008	0.035	0.001	0.028	296.918	0.905	1.3396
08/13/2011	7	0.012	0.013	0.005	0	0.001	0.001	0.004	0.008	0.034	0.001	0.028	297.176	0.912	1.38705
08/13/2011	8	0.01	0.013	0.005	0	0.001	0.001	0.005	0.008	0.034	0.001	0.028	299.169	0.855	1.07756
08/13/2011	9	0.002	0.016	0.027	0	0.001	0.001	0.002	0.005	0.031	0	0.03	300.779	0.787	-0.0343339
08/13/2011	10	0.001	0.018	0.042	0	0.001	0	0.001	0.003	0.024	0	0.031	301.927	0.735	-0.0715242
08/13/2011	11	0	0.01	0.028	0	0.001	0	0.001	0.002	0.018	0	0.029	302.982	0.681	-0.387898
08/13/2011	12	0	0.005	0.019	0	0	0	0.001	0.001	0.014	0	0.027	303.837	0.637	-0.568015
08/13/2011	13	0	0.003	0.013	0	0	0	0.001	0.001	0.013	0	0.025	304.796	0.595	-0.60502
08/13/2011	14	0	0.002	0.01	0	0	0	0.001	0.001	0.013	0	0.024	305.368	0.57	-0.61787
08/13/2011	15	0	0.003	0.012	0	0	0	0.001	0.001	0.012	0	0.026	305.775	0.561	-0.684105
08/13/2011	16	0	0.005	0.013	0	0	0	0	0.001	0.012	0	0.027	305.01	0.585	-0.687801
08/13/2011	17	0	0.003	0.01	0	0	0	0.001	0.001	0.013	0	0.023	304.221	0.602	-0.566758
08/13/2011	18	0	0.002	0.008	0	0	0	0.001	0.001	0.014	0	0.019	303.735	0.602	-0.340217
08/13/2011	19	0	0.002	0.007	0	0	0	0.001	0.001	0.015	0	0.017	302.845	0.61	0.0246529
08/13/2011	20	0.001	0.004	0.007	0	0	0	0.001	0.001	0.021	0	0.018	301.176	0.667	-0.176396
08/13/2011	21	0.003	0.006	0.006	0	0.001	0	0.002	0.001	0.028	0	0.019	300.136	0.711	-0.233922
08/13/2011	22	0.006	0.007	0.006	0	0.001	0	0.002	0.002	0.033	0	0.02	299.432	0.744	0.234865
08/13/2011	23	0.01	0.008	0.006	0	0.001	0	0.002	0.002	0.033	0	0.02	298.896	0.776	0.658899
08/13/2011	24	0.011	0.007	0.005	0.001	0.001	0	0.002	0.002	0.032	0	0.019	298.342	0.822	1.6563
08/14/2011	1	0.009	0.006	0.004	0.001	0.001	0	0.002	0.002	0.03	0	0.018	297.763	0.878	1.81259
08/14/2011	2	0.006	0.003	0.003	0.001	0.001	0	0.002	0.001	0.027	0	0.016	297.388	0.912	1.93874
08/14/2011	3	0.004	0.001	0.002	0.001	0.001	0	0.001	0.001	0.023	0	0.013	297.182	0.927	2.05943
08/14/2011	4	0.004	0.001	0.002	0.001	0.001	0	0.001	0.001	0.019	0	0.011	297.049	0.936	2.08726
08/14/2011	5	0.002	0	0.001	0	0.001	0	0.001	0.001	0.016	0	0.009	296.946	0.945	1.29583
08/14/2011	6	0.002	0	0.001	0	0.001	0	0.001	0.001	0.013	0	0.008	296.822	0.952	1.22947
08/14/2011	7	0.002	0	0.001	0	0.001	0	0.001	0.001	0.012	0	0.007	297.099	0.94	1.17174
08/14/2011	8	0.002	0.001	0.002	0.001	0	0	0.001	0.001	0.01	0	0.007	298.587	0.892	0.0490014
08/14/2011	9	0.002	0.002	0.003	0.001	0	0	0.001	0.001	0.009	0	0.007	300.119	0.828	-0.218934
08/14/2011	10	0.002	0.002	0.004	0.001	0	0	0.001	0.001	0.009	0	0.008	301.849	0.733	-0.39498
08/14/2011	11	0.001	0.002	0.005	0	0	0	0.001	0.001	0.01	0	0.009	303.283	0.668	-0.39134
08/14/2011	12	0.001	0.002	0.008	0	0	0	0.001	0.001	0.009	0	0.01	304.48	0.615	-0.146679
08/14/2011	13	0	0.001	0.01	0	0	0	0.001	0.001	0.01	0	0.012	305.876	0.558	0.0150628
08/14/2011	14	0	0.001	0.011	0	0	0	0.001	0.001	0.01	0	0.013	307.05	0.503	-0.237333
08/14/2011	15	0	0.001	0.011	0	0	0	0.001	0.001	0.01	0	0.013	306.971	0.498	-0.236975
08/14/2011	16	0	0.001	0.011	0	0	0	0.001	0.001	0.012	0	0.013	306.391	0.512	0.0729075
08/14/2011	17	0.001	0.001	0.009	0	0	0	0.001	0.001	0.014	0	0.013	305.386	0.535	-0.253773
08/14/2011	18	0.002	0.002	0.006	0.001	0	0	0.001	0.002	0.017	0	0.013	304.165	0.575	-0.606729
08/14/2011	19	0.003	0.002	0.004	0.001	0	0	0.001	0.002	0.017	0	0.013	302.657	0.629	-0.492625
08/14/2011	20	0.002	0.002	0.003	0.001	0.001	0	0.001	0.002	0.015	0	0.013	299.634	0.758	-0.242136
08/14/2011	21	0.002	0.002	0.002	0.002	0.001	0	0.001	0.002	0.014	0	0.012	298.203	0.808	-0.129889
08/14/2011	22	0.002	0.003	0.002	0.002	0.001	0.001	0.002	0.002	0.014	0	0.012	297.371	0.829	0.0248135
08/14/2011	23	0.002	0.004	0.002	0.002	0.001	0.001	0.002	0.002	0.013	0	0.012	296.714	0.841	0.0392887
08/14/2011	24	0.002	0.005	0.002	0.002	0.001	0.001	0.002	0.002	0.014	0	0.012	296.15	0.854	0.0997122
08/15/2011	1	0.001	0.01	0.003	0.002	0.001	0	0.002	0.002	0.016	0	0.014	295.637	0.86	0.0551466
08/15/2011	2	0.001	0.014	0.003	0.002	0.001	0	0.002	0.002	0.021	0	0.019	295.213	0.861	0.0721286
08/15/2011	3	0.001	0.017	0.004	0.002	0.002	0	0.002	0.002	0.029	0	0.025	294.843	0.858	0.0911813
08/15/2011	4	0.001	0.018	0.004	0.002	0.002	0	0.002	0.002	0.035	0	0.029	294.473	0.86	0.0976087
08/15/2011	5	0.002	0.018	0.005	0.002	0.002	0	0.002	0.002	0.04	0	0.031	294.069	0.867	0.160138
08/15/2011	6	0.002	0.018	0.006	0.002	0.002	0	0.003	0.002	0.043	0	0.033	293.682	0.879	0.218786
08/15/2011	7	0.002	0.018	0.007	0.002	0.002	0	0.003	0.002	0.046	0.001	0.034	293.586	0.867	0.201903
08/15/2011	8	0.002	0.034	0.021	0.001	0.002	0.001	0.003	0.003	0.049	0.001	0.037	294.771	0.826	0.113534
08/15/2011	9	0.001	0.06	0.042	0.001	0.002	0.001	0.003	0.003	0.052	0.001	0.041	296.782	0.743	-0.140993
08/15/2011	10	0.001	0.09	0.063	0	0.002	0.001	0.003	0.004	0.056	0.001	0.058	298.817	0.62	0.1172
08/15/2011	11	0	0.091	0.078	0	0.001	0.001	0.003	0.004	0.054	0.001	0.078	300.713	0.54	-0.418733
08/15/2011	12	0	0.067	0.069	0	0.001	0.001	0.003	0.004	0.05	0.002	0.079	302.657	0.468	-0.584128
08/15/2011	13	0	0.056	0.057	0	0.001	0.001	0.002	0.004	0.049	0.002	0.076	304.433	0.405	-0.648636
08/15/2011	14	0	0.046	0.045	0.001	0.001	0	0.002	0.004	0.048	0.002	0.072	305.231	0.377	-0.699625
08/15/2011	15	0	0.042	0.038	0.001	0.001	0	0.002	0.004	0.049	0.002	0.07	304.817	0.386	-0.638711
08/15/2011	16	0	0.04	0.035	0	0.001	0	0.002	0.004	0.05	0.002	0.07	303.871	0.412	-0.590417
08/15/2011	17	0	0.042	0.032	0	0.001	0	0.002	0.004	0.052	0.002	0.071	302.563	0.445	-0.5112
08/15/2011	18	0	0.043	0.029	0	0.001	0	0.002	0.004	0.054	0.001	0.073	301.233	0.479	-0.467584
08/15/2011	19	0	0.037	0.023	0	0.001	0.001	0.002	0.004	0.057	0.001	0.074	300.305	0.509	-0.287713
08/15/2011	20	0	0.031	0.02	0	0.001	0.001	0.003	0.005	0.06	0.001	0.073	298.77	0.552	0.040959
08/15/2011	21	0	0.029	0.018	0	0.001	0.001	0.003	0.006	0.065	0.001	0.073	297.559	0.596	0.204648
08/15/2011	22	0.001	0.025	0.016	0	0.001	0.001	0.004	0.007	0.071	0.001	0.075	296.568	0.647	0.0998355
08/15/2011	23	0.001	0.02	0.012	0.001	0.002	0.001	0.004	0.007	0.079	0.001	0.08	295.782	0.696	0.00198405
08/15/2011	24	0.001	0.017	0.009	0.001	0.002	0.001	0.005	0.008	0.087	0.001	0.085	295.296	0.723	-0.0466872
08/16/2011	1	0.001	0.016	0.008	0.001	0.002	0.001	0.005	0.009	0.096	0.002	0.09	294.61	0.784	-0.0345319
08/16/2011	2	0.001	0.016	0.009	0.001	0.003	0.001	0.005	0.009	0.103	0.002	0.093	294.109	0.824	0.0243771
08/16/2011	3	0.001	0.016	0.01	0.001	0.003	0.001	0.006	0.009	0.111	0.002	0.096	293.74	0.843	0.0789084
08/16/2011	4	0.001	0.025	0.018	0.001	0.003	0.001	0.006	0.01	0.116	0.002	0.099	293.361	0.86	0.140113
08/16/2011	5	0.001	0.037	0.029	0	0.003	0.001	0.006	0.01	0.117	0.002	0.102	293	0.875	0.181893
08/16/2011	6	0.001	0.039	0.03	0	0.003	0.001	0.006	0.01	0.117	0.002	0.104	292.729	0.887	0.203264
08/16/2011	7	0.001	0.05	0.038	0	0.003	0.001	0.006	0.01	0.115	0.002	0.106	292.541	0.906	0.252048
08/16/2011	8	0.001	0.078	0.061	0	0.003	0.001	0.006	0.009	0.106	0.002	0.112	293.794	0.873	0.0761991
08/16/2011	9	0	0.111	0.08	0	0.003	0.001	0.005	0.009	0.093	0.002	0.118	296.339	0.772	-0.100903
08/16/2011	10	0	0.155	0.1	0	0.002	0.001	0.005	0.008	0.078	0.001	0.12	298.909	0.662	-0.365564
08/16/2011	11	0	0.154	0.116	0	0.002	0.001	0.004	0.007	0.068	0.001	0.119	301.077	0.565	-0.566297
08/16/2011	12	0	0.13	0.11	0	0.001	0.001	0.003	0.006	0.061	0.001	0.118	302.844	0.505	-0.681065
08/16/2011	13	0	0.114	0.095	0	0.001	0.001	0.003	0.006	0.056	0.001	0.113	304.69	0.449	-0.752919
08/16/2011	14	0	0.106	0.086	0	0.001	0.001	0.003	0.005	0.054	0.001	0.111	305.836	0.417	-0.790964
08/16/2011	15	0	0.099	0.076	0	0.001	0.001	0.003	0.005	0.052	0.001	0.106	305.993	0.407	-0.796204
08/16/2011	16	0	0.088	0.065	0	0.001	0.001	0.003	0.005	0.05	0.001	0.098	305.676	0.407	-0.778533
08/16/2011	17	0	0.078	0.052	0	0.001	0.001	0.002	0.005	0.048	0.001	0.092	304.478	0.418	-0.763788
08/16/2011	18	0	0.069	0.039	0	0.001	0.001	0.003	0.005	0.051	0.001	0.091	303.813	0.43	-0.713097
08/16/2011	19	0	0.056	0.026	0	0.001	0.001	0.003	0.005	0.055	0.001	0.09	302.251	0.52	-0.565383
08/16/2011	20	0	0.054	0.021	0.001	0.001	0.001	0.003	0.006	0.062	0.001	0.092	300.888	0.457	-0.538778
08/16/2011	21	0	0.054	0.013	0.002	0.002	0.001	0.004	0.007	0.076	0.001	0.095	299.252	0.512	-0.0235225
08/16/2011	22	0.001	0.063	0.015	0.002	0.002	0.001	0.004	0.007	0.099	0.001	0.098	298.102	0.563	0.195454
08/16/2011	23	0.001	0.072	0.016	0.002	0.002	0.001	0.004	0.008	0.125	0.001	0.099	297.123	0.616	-0.518088
08/16/2011	24	0.002	0.074	0.016	0.002	0.002	0.002	0.005	0.01	0.142	0.002	0.1	296.193	0.683	-0.185377
08/17/2011	1	0.004	0.075	0.016	0.001	0.002	0.002	0.005	0.011	0.15	0.002	0.099	295.514	0.738	0.12289
08/17/2011	2	0.006	0.076	0.015	0.001	0.003	0.002	0.006	0.012	0.149	0.002	0.096	294.795	0.803	0.393733
08/17/2011	3	0.006	0.077	0.017	0.001	0.003	0.002	0.006	0.013	0.144	0.002	0.091	294.5	0.815	0.457891
08/17/2011	4	0.006	0.074	0.019	0.001	0.003	0.002	0.006	0.013	0.138	0.002	0.087	294.332	0.816	0.462019
08/17/2011	5	0.006	0.069	0.02	0.001	0.003	0.002	0.006	0.014	0.13	0.002	0.084	294.267	0.811	0.434822
08/17/2011	6	0.006	0.064	0.021	0.001	0.003	0.002	0.007	0.014	0.12	0.002	0.081	294.306	0.803	0.395384
08/17/2011	7	0.005	0.061	0.023	0.001	0.003	0.002	0.007	0.015	0.113	0.002	0.079	294.689	0.796	0.368646
08/17/2011	8	0.005	0.058	0.028	0	0.004	0.002	0.008	0.016	0.105	0.001	0.077	297.131	0.729	0.1353
08/17/2011	9	0.002	0.182	0.079	0	0.004	0.002	0.006	0.013	0.088	0.001	0.074	299.001	0.659	-0.201154
08/17/2011	10	0.001	0.208	0.07	0	0.003	0.001	0.004	0.008	0.085	0.001	0.071	301.203	0.582	-0.337877
08/17/2011	11	0.001	0.194	0.06	0	0.002	0.001	0.003	0.006	0.089	0	0.069	303.468	0.482	-0.46228
08/17/2011	12	0.001	0.145	0.053	0	0.001	0.001	0.002	0.004	0.087	0	0.07	304.88	0.435	-0.140699
08/17/2011	13	0.001	0.115	0.05	0	0.001	0.001	0.002	0.004	0.076	0	0.071	306.276	0.397	0.230678
08/17/2011	14	0	0.097	0.049	0	0.001	0.001	0.002	0.004	0.067	0	0.069	307.19	0.373	0.470258
08/17/2011	15	0	0.082	0.05	0	0.001	0.001	0.002	0.004	0.059	0	0.066	307.182	0.37	0.606949
08/17/2011	16	0	0.073	0.05	0	0.001	0.001	0.002	0.004	0.054	0	0.063	306.791	0.376	0.44795
08/17/2011	17	0	0.068	0.049	0	0.001	0.001	0.002	0.004	0.052	0	0.061	306.065	0.387	0.429746
08/17/2011	18	0	0.062	0.043	0	0.001	0.001	0.002	0.004	0.053	0	0.061	305.719	0.379	0.585324
08/17/2011	19	0	0.058	0.04	0	0.001	0.001	0.002	0.005	0.056	0	0.061	304.893	0.382	0.517355
08/17/2011	20	0.001	0.056	0.035	0	0.001	0.001	0.003	0.006	0.061	0	0.061	302.828	0.428	0.211576
08/17/2011	21	0.001	0.054	0.029	0	0.001	0.001	0.003	0.007	0.064	0	0.061	301.129	0.482	0.0232057
08/17/2011	22	0.001	0.054	0.023	0	0.001	0.001	0.004	0.008	0.066	0	0.062	299.785	0.54	-0.115271
08/17/2011	23	0.001	0.058	0.019	0	0.001	0.001	0.004	0.008	0.068	0.001	0.063	298.679	0.604	-0.187873
08/17/2011	24	0.001	0.069	0.017	0	0.001	0.001	0.004	0.009	0.068	0.001	0.065	297.701	0.677	-0.0863787
08/18/2011	1	0.001	0.083	0.015	0.001	0.001	0.002	0.004	0.009	0.068	0.001	0.068	296.835	0.758	0.0186028
08/18/2011	2	0.001	0.097	0.013	0.001	0.002	0.002	0.004	0.009	0.067	0.001	0.073	296.301	0.796	0.0616133
08/18/2011	3	0.001	0.107	0.012	0.001	0.002	0.002	0.005	0.009	0.066	0.001	0.078	295.838	0.826	0.0643274
08/18/2011	4	0.001	0.109	0.01	0.001	0.002	0.002	0.005	0.009	0.066	0.001	0.082	295.492	0.843	0.0366748
08/18/2011	5	0	0.102	0.009	0.001	0.002	0.002	0.005	0.009	0.067	0.001	0.084	295.25	0.846	0.0347904
08/18/2011	6	0	0.091	0.009	0.001	0.002	0.002	0.005	0.01	0.068	0.001	0.086	295.021	0.851	0.0309007
08/18/2011	7	0.001	0.081	0.008	0.001	0.002	0.002	0.006	0.01	0.069	0.001	0.086	294.942	0.865	0.0777181
08/18/2011	8	0.001	0.08	0.016	0	0.003	0.002	0.006	0.01	0.07	0.001	0.087	296.614	0.808	0.0472258
08/18/2011	9	0	0.108	0.047	0	0.004	0.001	0.005	0.008	0.069	0.001	0.09	299.09	0.707	-0.0240113
08/18/2011	10	0	0.111	0.054	0	0.004	0.001	0.004	0.007	0.068	0	0.089	301.572	0.609	-0.0308374
08/18/2011	11	0	0.089	0.058	0	0.003	0.001	0.004	0.006	0.068	0	0.088	304.128	0.501	-0.0927375
08/18/2011	12	0	0.071	0.06	0	0.002	0.001	0.003	0.006	0.065	0	0.084	305.938	0.437	-0.220556
08/18/2011	13	0	0.067	0.059	0	0.002	0.001	0.003	0.005	0.061	0	0.076	307.809	0.384	-0.0804751
08/18/2011	14	0	0.067	0.053	0	0.002	0.001	0.003	0.005	0.057	0	0.07	308.816	0.361	0.21638
08/18/2011	15	0	0.067	0.047	0	0.001	0.001	0.002	0.004	0.052	0	0.063	308.555	0.37	-0.0181334
08/18/2011	16	0	0.07	0.042	0	0.001	0.001	0.002	0.004	0.049	0	0.059	307.802	0.391	0.175495
08/18/2011	17	0	0.072	0.038	0	0.001	0.001	0.002	0.004	0.048	0	0.056	306.753	0.418	0.46673
08/18/2011	18	0	0.068	0.031	0	0.001	0.001	0.002	0.004	0.05	0	0.055	305.775	0.433	0.429996
08/18/2011	19	0.001	0.061	0.025	0	0.001	0.001	0.002	0.005	0.054	0	0.056	304.726	0.456	0.257156
08/18/2011	20	0.001	0.052	0.021	0	0.001	0.001	0.003	0.006	0.058	0	0.056	302.945	0.503	0.0503218
08/18/2011	21	0.001	0.049	0.021	0	0.001	0.001	0.004	0.007	0.06	0	0.055	301.52	0.549	-0.157734
08/18/2011	22	0.001	0.045	0.021	0	0.001	0.001	0.004	0.007	0.061	0	0.055	300.354	0.602	-0.191591
08/18/2011	23	0.001	0.04	0.02	0	0.001	0.001	0.004	0.008	0.061	0	0.055	299.395	0.66	-0.185694
08/18/2011	24	0.002	0.034	0.019	0	0.002	0.001	0.004	0.008	0.061	0	0.055	298.568	0.721	-0.142483
08/19/2011	1	0.001	0.028	0.017	0	0.002	0.001	0.004	0.008	0.06	0	0.055	297.812	0.787	0.0137717
08/19/2011	2	0.001	0.023	0.015	0	0.002	0.001	0.005	0.008	0.06	0	0.056	297.259	0.835	0.128757
08/19/2011	3	0.001	0.019	0.013	0	0.002	0.001	0.005	0.007	0.059	0	0.056	296.911	0.86	0.168267
08/19/2011	4	0.001	0.016	0.012	0	0.002	0.001	0.005	0.007	0.058	0	0.056	296.647	0.875	0.216946
08/19/2011	5	0.001	0.014	0.012	0	0.002	0.001	0.005	0.007	0.058	0	0.056	296.424	0.889	0.245702
08/19/2011	6	0.001	0.013	0.013	0	0.002	0.001	0.005	0.007	0.058	0	0.055	296.252	0.903	0.283761
08/19/2011	7	0.002	0.013	0.013	0	0.002	0.001	0.005	0.008	0.059	0	0.055	296.382	0.913	0.341685
08/19/2011	8	0.002	0.013	0.013	0	0.002	0.001	0.004	0.007	0.059	0	0.055	298.131	0.857	0.170822
08/19/2011	9	0.001	0.023	0.016	0	0.002	0.001	0.004	0.005	0.058	0	0.06	300.336	0.767	0.0884014
08/19/2011	10	0.001	0.042	0.02	0	0.003	0.001	0.003	0.005	0.06	0.001	0.061	302.554	0.666	0.090953
08/19/2011	11	0.001	0.154	0.03	0	0.003	0.001	0.003	0.005	0.062	0.001	0.062	304.598	0.569	0.113962
08/19/2011	12	0.001	0.195	0.037	0	0.002	0.001	0.003	0.005	0.06	0.001	0.063	306.047	0.513	0.233868
08/19/2011	13	0.001	0.174	0.04	0	0.002	0.001	0.002	0.005	0.057	0.001	0.063	307.605	0.461	0.341746
08/19/2011	14	0	0.155	0.038	0	0.002	0.001	0.002	0.005	0.055	0	0.063	308.636	0.428	0.428107
08/19/2011	15	0	0.121	0.033	0	0.002	0.001	0.002	0.004	0.049	0	0.059	308.774	0.418	0.348326
08/19/2011	16	0	0.081	0.028	0	0.001	0.001	0.002	0.004	0.042	0	0.056	308.413	0.42	-0.317189
08/19/2011	17	0	0.055	0.023	0	0.001	0	0.002	0.003	0.037	0	0.054	307.732	0.429	-0.591902
08/19/2011	18	0	0.035	0.013	0	0.001	0	0.001	0.003	0.035	0	0.049	306.32	0.483	-0.503881
08/19/2011	19	0	0.017	0.006	0.001	0.001	0	0.001	0.003	0.035	0	0.04	304.465	0.569	0.15144
08/19/2011	20	0.001	0.01	0.005	0.001	0.001	0	0.002	0.003	0.035	0	0.035	303.271	0.542	0.0812985
08/19/2011	21	0.001	0.007	0.005	0.001	0.001	0.001	0.002	0.003	0.037	0	0.034	302.14	0.564	-0.138802
08/19/2011	22	0.001	0.006	0.005	0.001	0.001	0.001	0.002	0.003	0.039	0	0.034	301.069	0.618	-0.206285
08/19/2011	23	0.001	0.004	0.004	0.001	0.001	0.001	0.002	0.003	0.038	0	0.033	300.117	0.69	-0.153635
08/19/2011	24	0.001	0.003	0.003	0.002	0.001	0.001	0.002	0.003	0.033	0	0.029	299.239	0.756	-0.0761098
08/20/2011	1	0.001	0.002	0.003	0.002	0.001	0	0.001	0.002	0.029	0	0.027	298.19	0.838	0.0464555
08/20/2011	2	0.001	0.004	0.003	0.001	0.001	0	0.001	0.002	0.025	0	0.025	297.508	0.884	0.115118
08/20/2011	3	0.001	0.004	0.003	0.001	0.001	0	0.001	0.002	0.02	0	0.025	297.109	0.92	0.153628
08/20/2011	4	0	0.002	0.002	0.001	0.001	0	0.001	0.001	0.017	0	0.026	296.801	0.942	0.102962
08/20/2011	5	0	0.001	0.002	0.001	0.001	0	0.001	0.001	0.014	0	0.027	296.709	0.942	0.0270163
08/20/2011	6	0	0.001	0.002	0.001	0.001	0	0.001	0.001	0.012	0	0.027	296.649	0.933	-0.0643826
08/20/2011	7	0	0.005	0.003	0.001	0.001	0	0.001	0.001	0.014	0	0.032	296.601	0.938	-0.0209811
08/20/2011	8	0	0.019	0.008	0.001	0.002	0.001	0.001	0.003	0.027	0.001	0.055	297.9	0.904	-0.13721
08/20/2011	9	0	0.038	0.02	0.001	0.003	0.001	0.002	0.006	0.038	0.001	0.077	299.805	0.834	-0.283277
08/20/2011	10	0	0.036	0.03	0.001	0.003	0.001	0.003	0.007	0.043	0.001	0.084	301.866	0.758	-0.358876
08/20/2011	11	0	0.028	0.04	0	0.002	0.001	0.002	0.006	0.044	0.001	0.075	304.46	0.646	-0.419586
08/20/2011	12	0	0.019	0.042	0	0.001	0.001	0.002	0.004	0.036	0.001	0.053	306.332	0.56	-0.343073
08/20/2011	13	0	0.012	0.033	0	0.001	0	0.001	0.002	0.026	0	0.037	307.816	0.503	-0.488781
08/20/2011	14	0	0.004	0.018	0	0.001	0	0.001	0.002	0.021	0	0.028	306.303	0.546	-0.271286
08/20/2011	15	0	0.001	0.009	0	0	0	0.001	0.001	0.017	0	0.02	306.106	0.553	-0.0927784
08/20/2011	16	0	0	0.007	0	0	0	0	0.001	0.013	0	0.015	304.651	0.597	-0.170411
08/20/2011	17	0.001	0	0.005	0	0	0	0	0.001	0.011	0	0.011	303.446	0.643	-0.146047
08/20/2011	18	0.001	0	0.003	0.001	0	0	0.001	0.001	0.011	0	0.009	302.199	0.715	-0.377827
08/20/2011	19	0.002	0.001	0.003	0.001	0	0	0.001	0.001	0.012	0	0.01	301.035	0.772	-0.273018
08/20/2011	20	0.002	0.001	0.002	0.001	0.001	0	0.001	0.002	0.015	0	0.012	299.896	0.785	-0.192365
08/20/2011	21	0.002	0.001	0.002	0.001	0.001	0	0.001	0.002	0.018	0	0.015	299.142	0.79	-0.157077
08/20/2011	22	0.002	0.002	0.002	0.002	0.001	0.001	0.002	0.002	0.022	0	0.019	298.464	0.83	0.0225946
08/20/2011	23	0.002	0.003	0.002	0.002	0.002	0.001	0.002	0.003	0.027	0	0.025	297.969	0.87	0.14863
08/20/2011	24	0.002	0.004	0.002	0.002	0.002	0.001	0.002	0.003	0.034	0	0.032	297.5	0.912	0.296098
08/21/2011	1	0.002	0.006	0.002	0.002	0.002	0.001	0.002	0.003	0.039	0	0.036	297.254	0.931	0.393065
08/21/2011	2	0.002	0.008	0.002	0.002	0.002	0.001	0.002	0.003	0.043	0	0.037	297.233	0.912	0.31905
08/21/2011	3	0.002	0.01	0.002	0.002	0.002	0.001	0.003	0.004	0.045	0	0.037	296.944	0.941	0.525053
08/21/2011	4	0.003	0.011	0.002	0.002	0.002	0.001	0.003	0.003	0.046	0	0.036	296.983	0.94	0.543781
08/21/2011	5	0.003	0.01	0.002	0.001	0.002	0.001	0.003	0.003	0.046	0	0.036	297.005	0.938	0.544716
08/21/2011	6	0.003	0.009	0.002	0.001	0.002	0.001	0.003	0.003	0.046	0	0.035	297.008	0.939	0.556349
08/21/2011	7	0.003	0.007	0.002	0.001	0.002	0.001	0.002	0.003	0.046	0	0.033	297.219	0.94	0.561631
08/21/2011	8	0.002	0.006	0.003	0.002	0.002	0.001	0.002	0.002	0.038	0	0.03	299.007	0.882	0.200172
08/21/2011	9	0.001	0.008	0.007	0.001	0.002	0	0.001	0.002	0.023	0	0.025	300.388	0.833	0.0352078
08/21/2011	10	0	0.006	0.01	0	0.001	0	0.001	0.001	0.015	0	0.021	301.933	0.769	-0.193011
08/21/2011	11	0	0.004	0.012	0	0.001	0	0.001	0.001	0.014	0	0.018	303.499	0.711	-0.115991
08/21/2011	12	0.001	0.003	0.014	0	0.001	0	0.001	0.001	0.015	0	0.018	305.412	0.645	0.0126743
08/21/2011	13	0.001	0.004	0.018	0	0.001	0	0.001	0.001	0.017	0	0.018	307.088	0.575	-0.0317916
08/21/2011	14	0.001	0.003	0.014	0.001	0	0	0.001	0.001	0.017	0	0.016	305.585	0.626	-0.136363
08/21/2011	15	0.002	0.001	0.009	0.001	0	0	0.001	0.001	0.015	0	0.013	305.289	0.638	-0.387301
08/21/2011	16	0.003	0.001	0.008	0.001	0	0	0.001	0.001	0.017	0	0.013	305.408	0.624	-0.530405
08/21/2011	17	0.003	0.001	0.008	0.001	0	0	0.001	0.001	0.017	0	0.013	305.513	0.597	-0.560103
08/21/2011	18	0.003	0.001	0.007	0	0	0	0.001	0.001	0.016	0	0.012	305.334	0.588	-0.59326
08/21/2011	19	0.003	0.001	0.006	0	0	0	0.001	0.001	0.014	0	0.01	303.946	0.624	-0.564341
08/21/2011	20	0.003	0	0.004	0.001	0	0	0.001	0.001	0.014	0	0.01	301.995	0.723	-0.381878
08/21/2011	21	0.004	0	0.003	0.001	0	0	0.001	0.001	0.016	0	0.009	300.896	0.759	1.7939
08/21/2011	22	0.005	0	0.002	0.001	0	0	0.001	0.001	0.016	0	0.01	300.027	0.806	1.90073
08/21/2011	23	0.004	0	0.002	0.002	0.001	0	0.001	0.001	0.017	0	0.01	299.53	0.835	1.89766
08/21/2011	24	0.002	0	0.001	0.002	0.001	0	0.001	0.001	0.018	0	0.011	299.238	0.84	1.98634
08/22/2011	1	0.003	0.001	0.001	0.001	0.001	0	0.001	0.001	0.018	0	0.012	298.574	0.915	2.17302
08/22/2011	2	0.002	0.002	0.001	0.001	0.002	0	0.001	0.001	0.019	0	0.014	298.354	0.921	0.276295
08/22/2011	3	0.002	0.004	0.002	0.001	0.002	0	0.001	0.001	0.02	0	0.016	298.045	0.934	0.331665
08/22/2011	4	0.002	0.005	0.002	0.001	0.003	0	0.001	0.001	0.021	0	0.017	297.844	0.943	0.421833
08/22/2011	5	0.002	0.006	0.002	0.001	0.004	0	0.001	0.001	0.022	0	0.018	297.749	0.947	0.518328
08/22/2011	6	0.003	0.006	0.002	0.001	0.004	0	0.001	0.001	0.022	0	0.018	297.649	0.946	0.531322
08/22/2011	7	0.002	0.005	0.002	0.001	0.003	0	0.001	0.001	0.021	0	0.017	297.635	0.941	0.425109
08/22/2011	8	0.002	0.004	0.003	0.001	0.002	0	0.001	0.001	0.017	0	0.015	298.856	0.904	0.166939
08/22/2011	9	0.002	0.002	0.003	0.001	0.001	0	0.001	0.001	0.012	0	0.01	300.849	0.838	-0.118664
08/22/2011	10	0.003	0.002	0.003	0	0.001	0	0.001	0.001	0.009	0	0.007	302.847	0.759	-0.150102
08/22/2011	11	0.004	0.009	0.007	0	0	0	0.001	0.001	0.01	0	0.007	304.849	0.666	-0.619397
08/22/2011	12	0.002	0.031	0.017	0	0	0	0.001	0.002	0.015	0	0.013	306.116	0.609	-0.528235
08/22/2011	13	0.001	0.033	0.022	0	0	0	0.001	0.002	0.018	0	0.017	307.32	0.564	-0.242521
08/22/2011	14	0.001	0.03	0.021	0	0	0	0.001	0.002	0.021	0	0.02	308.29	0.531	-0.161417
08/22/2011	15	0.001	0.022	0.018	0	0	0	0.001	0.002	0.021	0	0.022	308.434	0.514	0.0288875
08/22/2011	16	0.001	0.018	0.015	0	0	0	0.001	0.002	0.023	0	0.022	308.291	0.505	-0.105035
08/22/2011	17	0.003	0.017	0.012	0	0	0	0.001	0.001	0.027	0	0.021	307.478	0.509	-0.49838
08/22/2011	18	0.006	0.012	0.01	0.001	0.001	0	0.002	0.002	0.032	0	0.02	306.782	0.526	1.62045
08/22/2011	19	0.005	0.005	0.007	0.001	0.001	0	0.002	0.002	0.031	0	0.021	304.491	0.576	-0.442936
08/22/2011	20	0.002	0.004	0.006	0.001	0.001	0	0.002	0.001	0.03	0	0.024	302.996	0.601	-0.367493
08/22/2011	21	0.002	0.005	0.006	0.001	0.001	0	0.002	0.001	0.031	0	0.025	302.076	0.611	-0.343262
08/22/2011	22	0.004	0.008	0.007	0.001	0.001	0	0.003	0.002	0.038	0	0.026	301.316	0.635	-0.298041
08/22/2011	23	0.015	0.012	0.007	0.002	0.002	0.001	0.004	0.004	0.035	0.001	0.025	299.981	0.721	1.56588
08/22/2011	24	0.02	0.018	0.006	0.003	0.003	0.001	0.005	0.007	0.028	0.001	0.025	299.104	0.785	1.6571
08/23/2011	1	0.018	0.024	0.005	0.004	0.003	0.002	0.006	0.009	0.025	0.001	0.027	298.588	0.828	1.7371
08/23/2011	2	0.017	0.029	0.005	0.004	0.004	0.002	0.007	0.01	0.027	0.001	0.03	298.182	0.866	1.78641
08/23/2011	3	0.015	0.032	0.005	0.004	0.004	0.002	0.007	0.01	0.033	0.001	0.034	298.038	0.856	1.74992
08/23/2011	4	0.016	0.036	0.005	0.003	0.004	0.002	0.007	0.01	0.038	0.001	0.036	297.871	0.855	1.74542
08/23/2011	5	0.015	0.038	0.005	0.003	0.005	0.002	0.007	0.01	0.041	0.001	0.037	297.711	0.845	1.72011
08/23/2011	6	0.015	0.039	0.005	0.004	0.005	0.001	0.007	0.009	0.04	0.001	0.037	297.845	0.797	1.61502
08/23/2011	7	0.017	0.036	0.005	0.004	0.005	0.001	0.008	0.009	0.039	0.001	0.036	297.788	0.821	1.65453
08/23/2011	8	0.019	0.032	0.01	0.004	0.005	0.001	0.008	0.009	0.037	0.002	0.035	300.171	0.765	1.56569
08/23/2011	9	0.018	0.047	0.019	0.003	0.005	0.001	0.008	0.009	0.036	0.002	0.035	302.353	0.655	1.44922
08/23/2011	10	0.014	0.105	0.026	0.001	0.004	0.001	0.006	0.007	0.043	0.002	0.034	303.806	0.597	1.38
08/23/2011	11	0.008	0.137	0.029	0.001	0.003	0.001	0.004	0.005	0.05	0.001	0.035	305.665	0.505	1.36204
08/23/2011	12	0.002	0.215	0.034	0	0.002	0	0.003	0.003	0.052	0.001	0.043	307.079	0.449	-0.310806
08/23/2011	13	0.001	0.231	0.038	0	0.001	0	0.002	0.003	0.049	0.001	0.05	308.486	0.397	0.310924
08/23/2011	14	0	0.156	0.036	0	0.001	0	0.002	0.002	0.044	0.001	0.064	307.858	0.409	-0.651479
08/23/2011	15	0	0.087	0.029	0	0.001	0	0.002	0.002	0.042	0	0.075	306.847	0.448	-0.735208
08/23/2011	16	0	0.065	0.028	0	0.001	0	0.002	0.002	0.045	0	0.079	307.216	0.427	-0.751833
08/23/2011	17	0	0.053	0.023	0.001	0.001	0	0.002	0.003	0.052	0	0.077	307.561	0.376	-0.706821
08/23/2011	18	0	0.053	0.019	0.001	0.001	0.001	0.003	0.004	0.064	0	0.074	306.847	0.395	0.432584
08/23/2011	19	0.001	0.063	0.016	0.001	0.002	0.001	0.004	0.005	0.074	0.001	0.07	304.39	0.481	0.125603
08/23/2011	20	0.002	0.082	0.016	0.001	0.002	0.001	0.004	0.006	0.079	0.001	0.068	302.856	0.46	-0.21204
08/23/2011	21	0.002	0.099	0.017	0.001	0.002	0.001	0.005	0.007	0.082	0.001	0.066	301.571	0.495	-0.600775
08/23/2011	22	0.003	0.114	0.016	0.002	0.002	0.001	0.005	0.008	0.083	0.001	0.063	300.511	0.548	-0.427718
08/23/2011	23	0.005	0.104	0.013	0.002	0.003	0.002	0.006	0.009	0.082	0.001	0.061	299.585	0.622	-0.12594
08/23/2011	24	0.006	0.064	0.006	0.003	0.003	0.002	0.006	0.01	0.078	0.001	0.059	298.733	0.696	0.0447251
08/24/2011	1	0.006	0.042	0.004	0.004	0.003	0.002	0.007	0.011	0.076	0.001	0.057	298.084	0.76	0.164317
08/24/2011	2	0.005	0.032	0.003	0.004	0.003	0.002	0.007	0.01	0.073	0.001	0.056	297.644	0.801	0.217742
08/24/2011	3	0.004	0.025	0.003	0.004	0.003	0.002	0.006	0.01	0.071	0.001	0.055	297.348	0.804	0.196264
08/24/2011	4	0.004	0.024	0.003	0.004	0.003	0.002	0.005	0.009	0.07	0.001	0.054	297.112	0.786	0.15567
08/24/2011	5	0.004	0.031	0.004	0.004	0.003	0.002	0.005	0.009	0.07	0.001	0.053	296.944	0.769	0.142587
08/24/2011	6	0.003	0.041	0.006	0.003	0.003	0.001	0.004	0.008	0.071	0.002	0.053	296.673	0.761	0.0446212
08/24/2011	7	0.004	0.047	0.007	0.002	0.003	0.002	0.004	0.008	0.072	0.002	0.053	296.552	0.759	0.119546
08/24/2011	8	0.005	0.044	0.011	0.002	0.003	0.002	0.005	0.009	0.072	0.002	0.052	298.208	0.707	0.0701026
08/24/2011	9	0.005	0.064	0.025	0.001	0.003	0.001	0.004	0.008	0.071	0.002	0.049	300.646	0.629	-0.112235
08/24/2011	10	0.005	0.084	0.033	0	0.003	0.001	0.004	0.006	0.066	0.001	0.046	303.135	0.55	-0.311269
08/24/2011	11	0.002	0.095	0.038	0	0.002	0.001	0.003	0.004	0.059	0.001	0.045	305.841	0.458	-0.510058
08/24/2011	12	0.001	0.102	0.048	0	0.001	0.001	0.002	0.003	0.053	0.001	0.049	307.836	0.401	0.0355337
08/24/2011	13	0	0.095	0.049	0	0.001	0	0.002	0.003	0.046	0	0.05	309.495	0.367	0.494922
08/24/2011	14	0	0.077	0.041	0	0.001	0	0.001	0.002	0.039	0	0.044	310.391	0.35	0.0453724
08/24/2011	15	0	0.061	0.035	0	0.001	0	0.001	0.002	0.034	0	0.038	310.028	0.355	0.483515
08/24/2011	16	0	0.052	0.032	0	0.001	0	0.001	0.002	0.032	0	0.036	309.179	0.369	0.469112
08/24/2011	17	0	0.048	0.03	0	0.001	0	0.001	0.002	0.031	0	0.034	308.024	0.388	0.42541
08/24/2011	18	0	0.046	0.026	0	0.001	0	0.001	0.002	0.032	0	0.034	307.018	0.397	0.38514
08/24/2011	19	0.001	0.045	0.023	0	0.001	0	0.001	0.002	0.036	0	0.035	305.789	0.412	0.180344
08/24/2011	20	0.001	0.042	0.02	0	0.001	0.001	0.002	0.003	0.039	0	0.035	303.943	0.46	-0.189723
08/24/2011	21	0.001	0.039	0.017	0	0.001	0.001	0.002	0.004	0.042	0	0.035	302.533	0.513	-0.453533
08/24/2011	22	0.002	0.036	0.015	0	0.001	0.001	0.003	0.005	0.045	0	0.036	301.438	0.567	-0.413774
08/24/2011	23	0.003	0.035	0.015	0	0.001	0.001	0.003	0.006	0.048	0	0.037	300.52	0.625	-0.26956
08/24/2011	24	0.003	0.033	0.015	0	0.001	0.001	0.003	0.006	0.049	0	0.038	299.684	0.691	-0.173637
08/25/2011	1	0.004	0.032	0.014	0	0.001	0.001	0.004	0.007	0.049	0	0.038	298.916	0.765	0.0207407
08/25/2011	2	0.004	0.03	0.012	0	0.001	0.001	0.004	0.007	0.05	0	0.038	298.36	0.814	0.0997434
08/25/2011	3	0.004	0.027	0.011	0	0.001	0.001	0.004	0.007	0.049	0	0.038	297.963	0.834	0.140246
08/25/2011	4	0.003	0.026	0.009	0	0.001	0.001	0.004	0.007	0.049	0	0.038	297.639	0.837	0.165456
08/25/2011	5	0.003	0.024	0.008	0	0.001	0.001	0.005	0.007	0.048	0	0.038	297.249	0.847	0.202266
08/25/2011	6	0.003	0.022	0.007	0	0.002	0.001	0.005	0.007	0.048	0	0.038	296.915	0.854	0.220094
08/25/2011	7	0.004	0.021	0.007	0	0.002	0.002	0.005	0.008	0.048	0	0.038	296.703	0.862	0.291101
08/25/2011	8	0.004	0.025	0.011	0	0.002	0.002	0.006	0.008	0.047	0	0.038	298.183	0.811	0.148517
08/25/2011	9	0.004	0.052	0.023	0	0.004	0.001	0.005	0.006	0.048	0	0.037	300.472	0.719	-0.0673846
08/25/2011	10	0.008	0.073	0.027	0	0.004	0.001	0.005	0.005	0.051	0.001	0.036	302.962	0.616	-0.657693
08/25/2011	11	0.013	0.069	0.027	0	0.003	0.001	0.004	0.004	0.049	0.001	0.032	305.559	0.506	-0.590175
08/25/2011	12	0.007	0.047	0.028	0	0.002	0.001	0.003	0.003	0.048	0	0.03	307.463	0.436	-0.974006
08/25/2011	13	0.004	0.032	0.029	0	0.001	0	0.002	0.003	0.045	0	0.032	308.982	0.394	-0.720882
08/25/2011	14	0.002	0.021	0.027	0	0.001	0	0.002	0.002	0.042	0	0.034	308.542	0.409	-0.365212
08/25/2011	15	0.001	0.011	0.023	0	0.001	0	0.002	0.002	0.037	0	0.036	307.529	0.444	0.103424
08/25/2011	16	0.001	0.005	0.017	0	0.001	0	0.001	0.002	0.036	0	0.035	307.417	0.448	0.122979
08/25/2011	17	0.001	0.004	0.014	0	0.001	0	0.001	0.002	0.039	0	0.037	307.741	0.413	0.119322
08/25/2011	18	0.001	0.005	0.014	0	0.001	0	0.002	0.002	0.044	0	0.038	307.068	0.42	-0.0976819
08/25/2011	19	0.002	0.006	0.014	0	0.001	0	0.002	0.002	0.051	0	0.04	305.066	0.497	-0.323549
08/25/2011	20	0.002	0.006	0.014	0.001	0.001	0	0.003	0.002	0.056	0	0.042	303.33	0.526	-0.456389
08/25/2011	21	0.002	0.006	0.015	0.001	0.001	0.001	0.003	0.003	0.062	0	0.045	302.092	0.551	-0.444885
08/25/2011	22	0.003	0.008	0.017	0.001	0.002	0.001	0.004	0.004	0.067	0.001	0.048	301.148	0.584	-0.345242
08/25/2011	23	0.003	0.01	0.019	0.001	0.002	0.001	0.004	0.005	0.07	0.001	0.05	300.366	0.627	-0.241846
08/25/2011	24	0.003	0.012	0.022	0.001	0.002	0.001	0.005	0.006	0.072	0.001	0.052	299.664	0.682	-0.132282
08/26/2011	1	0.004	0.016	0.024	0.001	0.002	0.001	0.005	0.007	0.073	0.001	0.054	299.047	0.742	-0.0166764
08/26/2011	2	0.004	0.021	0.026	0.001	0.003	0.002	0.006	0.008	0.076	0.001	0.057	298.608	0.787	0.144621
08/26/2011	3	0.005	0.027	0.028	0	0.003	0.002	0.007	0.009	0.079	0.001	0.059	298.31	0.811	0.178596
08/26/2011	4	0.005	0.033	0.032	0	0.003	0.002	0.007	0.01	0.081	0.001	0.061	298.023	0.829	0.215919
08/26/2011	5	0.005	0.037	0.036	0	0.003	0.002	0.008	0.011	0.085	0.002	0.062	297.732	0.844	0.26183
08/26/2011	6	0.005	0.04	0.037	0	0.004	0.002	0.008	0.011	0.089	0.004	0.062	297.438	0.86	0.332222
08/26/2011	7	0.005	0.039	0.037	0	0.003	0.002	0.009	0.011	0.091	0.004	0.062	297.25	0.883	0.3923
08/26/2011	8	0.005	0.034	0.034	0	0.003	0.002	0.008	0.01	0.089	0.002	0.06	298.89	0.833	0.263252
08/26/2011	9	0.003	0.049	0.039	0	0.002	0.001	0.006	0.007	0.074	0	0.058	301.473	0.731	-0.0768204
08/26/2011	10	0.001	0.053	0.039	0	0.002	0.001	0.003	0.005	0.061	0	0.056	303.751	0.649	-0.0171747
08/26/2011	11	0.001	0.054	0.037	0	0.002	0.001	0.002	0.004	0.055	0	0.051	306.62	0.522	-0.0174434
08/26/2011	12	0.001	0.056	0.028	0	0.001	0	0.002	0.003	0.047	0	0.041	308.414	0.468	-0.119724
08/26/2011	13	0.001	0.022	0.018	0	0.001	0	0.002	0.003	0.037	0	0.032	307.938	0.473	-0.263974
08/26/2011	14	0.001	0.005	0.012	0	0.001	0	0.001	0.002	0.027	0	0.024	306.552	0.517	-0.221544
08/26/2011	15	0.002	0.001	0.009	0	0.001	0	0.001	0.002	0.021	0	0.018	305.697	0.536	-0.514924
08/26/2011	16	0.004	0.001	0.006	0.001	0.001	0	0.001	0.002	0.021	0	0.015	305.643	0.537	-0.579945
08/26/2011	17	0.01	0.001	0.004	0.001	0.001	0	0.002	0.003	0.018	0	0.013	305.797	0.555	1.81516
08/26/2011	18	0.014	0.002	0.004	0.003	0.001	0.001	0.002	0.004	0.019	0	0.015	305.23	0.597	1.89836
08/26/2011	19	0.011	0.002	0.006	0.003	0.001	0.001	0.003	0.005	0.029	0.001	0.022	302.812	0.689	1.69715
08/26/2011	20	0.004	0.006	0.01	0.004	0.002	0.001	0.004	0.006	0.054	0.001	0.042	301.329	0.696	-0.142223
08/26/2011	21	0.004	0.008	0.008	0.005	0.002	0.001	0.005	0.007	0.071	0.001	0.055	300.51	0.707	-0.109615
08/26/2011	22	0.004	0.01	0.005	0.007	0.003	0.001	0.006	0.007	0.084	0.001	0.061	299.916	0.73	-0.0199123
08/26/2011	23	0.003	0.015	0.005	0.007	0.003	0.001	0.006	0.006	0.097	0.001	0.072	299.477	0.748	-0.0255102
08/26/2011	24	0.002	0.02	0.006	0.006	0.003	0.001	0.005	0.006	0.106	0.001	0.083	299.183	0.758	-0.0315723
08/27/2011	1	0.002	0.017	0.005	0.006	0.003	0.001	0.005	0.005	0.108	0.001	0.086	298.951	0.764	-0.0419712
08/27/2011	2	0.002	0.015	0.006	0.005	0.003	0.001	0.005	0.005	0.104	0.001	0.085	298.698	0.769	-0.0111148
08/27/2011	3	0.002	0.013	0.006	0.005	0.003	0.001	0.004	0.005	0.1	0.001	0.081	298.285	0.781	-0.000800588
08/27/2011	4	0.002	0.011	0.006	0.005	0.003	0.001	0.004	0.005	0.097	0.001	0.074	297.814	0.79	0.0164539
08/27/2011	5	0.002	0.015	0.009	0.005	0.003	0.001	0.004	0.005	0.091	0.002	0.067	297.748	0.736	-0.0895376
08/27/2011	6	0.003	0.023	0.013	0.004	0.003	0.001	0.004	0.005	0.083	0.002	0.058	296.969	0.752	0.00163963
08/27/2011	7	0.003	0.026	0.014	0.003	0.003	0.001	0.004	0.005	0.079	0.002	0.054	296.146	0.776	0.108516
08/27/2011	8	0.003	0.032	0.019	0.003	0.003	0.001	0.004	0.005	0.081	0.003	0.056	297.161	0.733	-0.0156962
08/27/2011	9	0.003	0.049	0.029	0.002	0.003	0.001	0.004	0.006	0.086	0.004	0.061	299.126	0.666	-0.163605
08/27/2011	10	0.001	0.103	0.042	0.002	0.003	0.001	0.004	0.006	0.091	0.003	0.072	301.466	0.584	-0.361637
08/27/2011	11	0.001	0.143	0.056	0.001	0.002	0.001	0.003	0.006	0.091	0.003	0.084	303.831	0.483	0.148537
08/27/2011	12	0	0.17	0.067	0.001	0.002	0.001	0.003	0.005	0.084	0.002	0.091	306.247	0.409	0.570434
08/27/2011	13	0	0.179	0.059	0.001	0.002	0.001	0.002	0.005	0.077	0.001	0.086	308.22	0.354	0.683685
08/27/2011	14	0	0.191	0.049	0.001	0.002	0.001	0.002	0.005	0.072	0.001	0.076	309.144	0.328	0.513122
08/27/2011	15	0.001	0.192	0.041	0.001	0.001	0.001	0.002	0.004	0.069	0.001	0.065	308.86	0.326	0.193505
08/27/2011	16	0.001	0.17	0.034	0.001	0.001	0.001	0.002	0.004	0.064	0.001	0.052	308.249	0.331	-0.293312
08/27/2011	17	0.003	0.155	0.031	0.001	0.001	0.001	0.002	0.004	0.061	0.001	0.044	307.237	0.343	-0.704906
08/27/2011	18	0.007	0.159	0.027	0.002	0.001	0.001	0.002	0.005	0.066	0.001	0.044	306.044	0.365	-0.598716
08/27/2011	19	0.008	0.181	0.018	0.003	0.002	0.001	0.003	0.007	0.084	0.002	0.052	304.411	0.402	1.26629
08/27/2011	20	0.01	0.205	0.012	0.004	0.002	0.001	0.004	0.008	0.1	0.002	0.063	303.147	0.407	-0.361036
08/27/2011	21	0.012	0.232	0.014	0.004	0.002	0.001	0.005	0.009	0.111	0.003	0.07	302.046	0.42	-0.296915
08/27/2011	22	0.008	0.251	0.016	0.003	0.002	0.001	0.005	0.01	0.114	0.002	0.071	300.83	0.455	-0.223638
08/27/2011	23	0.007	0.269	0.018	0.002	0.002	0.001	0.005	0.01	0.108	0.002	0.071	299.803	0.485	-0.201682
08/27/2011	24	0.006	0.271	0.014	0.002	0.002	0.001	0.006	0.011	0.106	0.002	0.072	298.859	0.519	-0.138457
08/28/2011	1	0.006	0.256	0.011	0.002	0.003	0.001	0.006	0.011	0.105	0.002	0.073	297.91	0.557	-0.119452
08/28/2011	2	0.005	0.232	0.01	0.002	0.003	0.001	0.007	0.012	0.105	0.002	0.073	297.02	0.599	-0.0123362
08/28/2011	3	0.005	0.213	0.01	0.001	0.003	0.002	0.007	0.012	0.106	0.002	0.074	296.452	0.619	0.0440977
08/28/2011	4	0.005	0.218	0.015	0.001	0.003	0.002	0.008	0.013	0.107	0.002	0.075	295.748	0.648	0.110294
08/28/2011	5	0.005	0.257	0.027	0.001	0.004	0.002	0.008	0.014	0.109	0.002	0.077	295.077	0.676	0.176655
[truncated: 67 more rows]

## Sheet: CMAQ_2011
CENTVIL	32.9029	-87.2497
Date	Hour	NH3	SO2	HNO3	CL	NA	MG	K	CA	NH4	NO3	SO4	T	RH
Alabama local	1-24hr	umol/m3	umol/m3	umol/m3	umol/m3	umol/m3	umol/m3	umol/m3	umol/m3	umol/m3	umol/m3	umol/m3	K		pH
2011-02-06	1	0.053	0.021	0.004	0.004	0.003	0.002	0.005	0.011	0.01	0.001	0.022	297.431	0.808	2.16449
2011-02-06	2	0.062	0.021	0.003	0.004	0.003	0.002	0.006	0.012	0.008	0.001	0.022	297.023	0.84	2.48505
2011-02-06	3	0.068	0.022	0.003	0.003	0.003	0.002	0.006	0.013	0.005	0.002	0.021	296.787	0.852	2.84278
2011-02-06	4	0.068	0.023	0.003	0.003	0.004	0.002	0.007	0.013	0.004	0.002	0.021	296.615	0.858	3.13469
2011-02-06	5	0.064	0.022	0.002	0.004	0.004	0.002	0.007	0.013	0.002	0.002	0.02	296.459	0.865	3.28717
2011-02-06	6	0.062	0.02	0.002	0.004	0.004	0.002	0.007	0.013	0.002	0.002	0.02	296.365	0.868	3.27826
2011-02-06	7	0.061	0.019	0.004	0.003	0.004	0.002	0.008	0.013	0.002	0.002	0.019	297.201	0.871	3.20628
2011-02-06	8	0.054	0.017	0.007	0.003	0.004	0.002	0.008	0.013	0.002	0.002	0.019	300.374	0.78	3.10441
2011-02-06	9	0.069	0.038	0.012	0.001	0.003	0.001	0.006	0.008	0.013	0.002	0.02	302.31	0.694	1.7593
2011-02-06	10	0.052	0.042	0.021	0.001	0.002	0.001	0.003	0.004	0.028	0.001	0.021	304.306	0.603	1.46722
2011-02-06	11	0.032	0.026	0.019	0	0.002	0.001	0.002	0.003	0.027	0.001	0.019	306.134	0.529	0.885343
2011-02-06	12	0.026	0.021	0.018	0	0.002	0	0.002	0.002	0.028	0.001	0.019	307.836	0.468	0.350197
2011-02-06	13	0.023	0.022	0.018	0	0.001	0	0.002	0.002	0.03	0.001	0.02	310.087	0.395	-0.0167646
2011-02-06	14	0.01	0.012	0.015	0	0.001	0	0.002	0.002	0.038	0.001	0.022	307.468	0.44	-0.503329
2011-02-06	15	0.006	0.003	0.009	0	0.001	0	0.001	0.001	0.04	0.001	0.025	305.3	0.53	-0.499815
2011-02-06	16	0.006	0.002	0.005	0.001	0.001	0	0.001	0.001	0.05	0	0.027	306.182	0.528	1.70582
2011-02-06	17	0.01	0.003	0.007	0.001	0.001	0	0.001	0.001	0.057	0.001	0.031	306.981	0.471	1.61221
2011-02-06	18	0.008	0.006	0.008	0.001	0.001	0	0.001	0.002	0.064	0.001	0.035	306.139	0.519	1.56915
2011-02-06	19	0.006	0.007	0.008	0.001	0.001	0	0.002	0.002	0.072	0.001	0.039	304.488	0.557	1.51929
2011-02-06	20	0.006	0.009	0.008	0.002	0.001	0	0.002	0.002	0.082	0.001	0.045	302.434	0.567	1.4168
2011-02-06	21	0.007	0.011	0.009	0.002	0.002	0	0.003	0.002	0.089	0.001	0.049	301.15	0.574	1.33832
2011-02-06	22	0.011	0.012	0.01	0.002	0.002	0	0.003	0.002	0.093	0.001	0.051	300.233	0.601	1.30057
2011-02-06	23	0.017	0.013	0.011	0.001	0.002	0	0.004	0.002	0.093	0.001	0.051	299.397	0.645	1.30252
2011-02-06	24	0.024	0.013	0.011	0.001	0.002	0	0.004	0.002	0.09	0.001	0.05	298.592	0.705	1.31162
2011-03-06	1	0.03	0.012	0.01	0.001	0.002	0	0.004	0.002	0.086	0.001	0.048	297.763	0.785	1.42884
2011-03-06	2	0.032	0.01	0.008	0.001	0.002	0.001	0.004	0.002	0.08	0.001	0.045	297.198	0.838	1.57676
2011-03-06	3	0.031	0.008	0.006	0.001	0.002	0.001	0.004	0.002	0.073	0.001	0.042	296.937	0.852	1.61435
2011-03-06	4	0.031	0.007	0.004	0.001	0.002	0.001	0.004	0.003	0.065	0.001	0.038	296.834	0.846	1.68588
2011-03-06	5	0.03	0.005	0.003	0.001	0.002	0.001	0.004	0.003	0.058	0.001	0.035	296.759	0.835	1.71396
2011-03-06	6	0.025	0.004	0.002	0.002	0.003	0.001	0.003	0.002	0.052	0.001	0.032	296.574	0.853	1.75311
2011-03-06	7	0.025	0.004	0.002	0.002	0.003	0.001	0.003	0.002	0.049	0.001	0.03	297.472	0.852	1.79718
2011-03-06	8	0.017	0.006	0.003	0.001	0.003	0.001	0.003	0.003	0.045	0.001	0.028	300.215	0.747	1.73131
2011-03-06	9	0.009	0.023	0.009	0.001	0.003	0	0.002	0.002	0.029	0.001	0.02	302.54	0.659	1.50266
2011-03-06	10	0.007	0.03	0.015	0.001	0.002	0	0.001	0.002	0.022	0.001	0.015	304.637	0.58	1.42231
2011-03-06	11	0.007	0.036	0.017	0	0.001	0	0.001	0.002	0.024	0.001	0.016	307.051	0.489	-1.04287
2011-03-06	12	0.004	0.045	0.02	0	0.001	0	0.001	0.002	0.031	0.001	0.02	309.253	0.416	-0.751346
2011-03-06	13	0.002	0.025	0.017	0	0.001	0	0.001	0.002	0.032	0	0.024	306.985	0.483	-0.598861
2011-03-06	14	0.002	0.011	0.012	0	0.001	0	0.001	0.001	0.035	0	0.026	307.331	0.45	-0.535239
2011-03-06	15	0.002	0.006	0.01	0	0.001	0	0.001	0.001	0.039	0	0.027	308.784	0.408	-0.655745
2011-03-06	16	0.004	0.003	0.008	0.001	0.001	0	0.001	0.001	0.038	0	0.025	306.083	0.503	-0.585322
2011-03-06	17	0.004	0.002	0.006	0.001	0.001	0	0.001	0.001	0.037	0	0.022	305.923	0.456	1.61142
2011-03-06	18	0.017	0.001	0.005	0.001	0.001	0	0.001	0.001	0.037	0	0.02	306.065	0.448	1.65421
2011-03-06	19	0.029	0.002	0.005	0.001	0.001	0	0.001	0.001	0.037	0	0.02	304.308	0.497	1.58813
2011-03-06	20	0.025	0.002	0.005	0.002	0.001	0	0.001	0.001	0.038	0	0.021	302.108	0.531	1.4887
2011-03-06	21	0.022	0.004	0.005	0.002	0.001	0	0.001	0.001	0.039	0	0.021	300.93	0.542	1.43869
2011-03-06	22	0.023	0.007	0.006	0.002	0.001	0	0.001	0.001	0.039	0	0.022	299.92	0.589	1.39514
2011-03-06	23	0.025	0.009	0.006	0.001	0.001	0	0.001	0.001	0.039	0	0.022	299.08	0.656	1.43104
2011-03-06	24	0.029	0.009	0.006	0.001	0.001	0	0.001	0.001	0.037	0	0.021	298.31	0.733	1.46767
2011-04-06	1	0.03	0.008	0.006	0.001	0.001	0	0.002	0.001	0.034	0	0.02	297.602	0.813	1.58295
2011-04-06	2	0.028	0.007	0.005	0.001	0.001	0.001	0.002	0.002	0.029	0	0.018	297.114	0.858	1.73824
2011-04-06	3	0.026	0.006	0.005	0.001	0.001	0.001	0.002	0.002	0.024	0	0.016	296.851	0.867	1.7451
2011-04-06	4	0.027	0.007	0.004	0.001	0.002	0.001	0.003	0.002	0.018	0	0.014	296.648	0.871	1.81245
2011-04-06	5	0.029	0.008	0.004	0.001	0.002	0.001	0.003	0.003	0.013	0	0.012	296.413	0.879	1.96264
2011-04-06	6	0.033	0.009	0.004	0.001	0.002	0.001	0.004	0.003	0.01	0	0.012	296.455	0.858	1.98215
2011-04-06	7	0.034	0.009	0.005	0.002	0.003	0.001	0.005	0.004	0.007	0.001	0.012	297.176	0.862	2.20057
2011-04-06	8	0.037	0.013	0.011	0.001	0.003	0.001	0.006	0.005	0.005	0.001	0.013	299.54	0.797	2.11534
2011-04-06	9	0.068	0.038	0.018	0.001	0.004	0.001	0.007	0.005	0.008	0.001	0.014	302.067	0.692	2.18464
2011-04-06	10	0.051	0.057	0.028	0.001	0.003	0.001	0.005	0.003	0.014	0.001	0.015	304.612	0.581	1.54656
2011-04-06	11	0.022	0.059	0.035	0	0.002	0	0.003	0.002	0.019	0.001	0.014	306.57	0.492	-0.952596
2011-04-06	12	0.007	0.037	0.027	0	0.001	0	0.002	0.001	0.021	0	0.013	306.974	0.482	-1.33155
2011-04-06	13	0.003	0.023	0.018	0.001	0.001	0	0.002	0.001	0.019	0	0.014	306.327	0.502	-0.675076
2011-04-06	14	0.004	0.014	0.011	0.001	0.001	0	0.001	0.001	0.021	0	0.015	307.49	0.456	-0.733846
2011-04-06	15	0.004	0.014	0.011	0.001	0.001	0	0.001	0.001	0.028	0	0.017	308.873	0.404	1.64015
2011-04-06	16	0.009	0.025	0.015	0.001	0.001	0	0.001	0.001	0.029	0	0.017	309.455	0.368	1.60495
2011-04-06	17	0.013	0.015	0.011	0.001	0.001	0	0.001	0.001	0.029	0	0.017	305.339	0.527	1.49957
2011-04-06	18	0.015	0.008	0.006	0.001	0.001	0	0.002	0.001	0.029	0	0.017	304.318	0.589	1.64452
2011-04-06	19	0.025	0.009	0.006	0.001	0.001	0	0.002	0.001	0.03	0	0.018	303.185	0.62	1.60983
2011-04-06	20	0.038	0.012	0.006	0.002	0.001	0	0.002	0.002	0.027	0	0.017	301.224	0.603	1.49348
2011-04-06	21	0.034	0.012	0.005	0.002	0.001	0.001	0.002	0.003	0.024	0	0.017	299.912	0.595	1.55452
2011-04-06	22	0.027	0.011	0.003	0.003	0.002	0.001	0.003	0.004	0.019	0	0.017	299.793	0.555	1.64146
2011-04-06	23	0.028	0.012	0.003	0.004	0.002	0.001	0.004	0.006	0.015	0	0.017	298.724	0.633	1.66428
2011-04-06	24	0.034	0.012	0.003	0.004	0.002	0.001	0.005	0.007	0.011	0.001	0.017	297.977	0.722	1.74597
2011-05-06	1	0.034	0.011	0.003	0.004	0.003	0.002	0.005	0.008	0.008	0.001	0.017	297.526	0.764	2.09155
2011-05-06	2	0.038	0.011	0.003	0.004	0.003	0.002	0.006	0.009	0.005	0.001	0.017	296.96	0.831	2.5783
2011-05-06	3	0.041	0.012	0.002	0.004	0.003	0.002	0.007	0.01	0.002	0.001	0.017	296.686	0.856	3.25434
2011-05-06	4	0.04	0.013	0.002	0.003	0.004	0.002	0.008	0.011	0.002	0.001	0.018	296.464	0.866	3.23132
2011-05-06	5	0.04	0.016	0.002	0.003	0.004	0.002	0.009	0.012	0.002	0.002	0.018	296.29	0.871	3.20958
2011-05-06	6	0.039	0.018	0.002	0.003	0.005	0.002	0.01	0.012	0.002	0.002	0.018	296.216	0.872	3.25722
2011-05-06	7	0.039	0.021	0.004	0.003	0.005	0.002	0.011	0.013	0.002	0.002	0.019	297.107	0.848	3.27756
2011-05-06	8	0.057	0.041	0.01	0.002	0.005	0.002	0.01	0.013	0.003	0.003	0.02	299.529	0.761	3.08771
2011-05-06	9	0.077	0.089	0.017	0.001	0.004	0.001	0.007	0.009	0.015	0.002	0.023	301.987	0.661	1.75013
2011-05-06	10	0.056	0.085	0.021	0	0.003	0.001	0.004	0.005	0.026	0.001	0.022	304.848	0.544	1.40597
2011-05-06	11	0.038	0.076	0.021	0	0.002	0	0.003	0.003	0.03	0.001	0.021	306.951	0.457	0.828361
2011-05-06	12	0.032	0.056	0.018	0	0.001	0	0.003	0.003	0.029	0	0.019	308.64	0.402	0.744774
2011-05-06	13	0.027	0.042	0.017	0	0.001	0	0.003	0.002	0.028	0	0.018	310.444	0.349	0.527799
2011-05-06	14	0.019	0.025	0.015	0	0.001	0	0.003	0.002	0.03	0	0.019	310.285	0.338	0.107648
2011-05-06	15	0.018	0.015	0.014	0	0.001	0	0.003	0.002	0.033	0	0.02	308.763	0.376	0.142289
2011-05-06	16	0.019	0.009	0.012	0	0.001	0	0.003	0.001	0.035	0	0.021	306.379	0.433	0.180228
2011-05-06	17	0.026	0.01	0.01	0	0.001	0	0.003	0.002	0.035	0	0.022	307.691	0.368	0.374534
2011-05-06	18	0.039	0.016	0.012	0	0.002	0	0.003	0.002	0.034	0	0.021	307.153	0.355	0.730159
2011-05-06	19	0.041	0.02	0.009	0.001	0.002	0	0.003	0.002	0.033	0	0.021	305.953	0.366	1.52703
2011-05-06	20	0.027	0.012	0.004	0.001	0.002	0	0.004	0.002	0.032	0	0.021	300.78	0.507	1.51613
2011-05-06	21	0.021	0.006	0.003	0.002	0.002	0.001	0.004	0.003	0.03	0	0.022	299.128	0.564	1.58636
2011-05-06	22	0.02	0.005	0.003	0.003	0.003	0.001	0.006	0.004	0.028	0	0.023	298.704	0.562	1.5598
2011-05-06	23	0.025	0.005	0.003	0.004	0.004	0.001	0.007	0.005	0.025	0	0.024	297.243	0.65	1.61525
2011-05-06	24	0.039	0.007	0.003	0.004	0.004	0.001	0.009	0.006	0.023	0	0.025	296.522	0.713	1.6618
2011-06-06	1	0.052	0.009	0.003	0.004	0.004	0.001	0.01	0.007	0.019	0.001	0.025	295.769	0.806	2.047
2011-06-06	2	0.058	0.01	0.002	0.004	0.005	0.002	0.011	0.009	0.014	0.001	0.025	295.245	0.863	2.51558
2011-06-06	3	0.053	0.011	0.002	0.004	0.005	0.002	0.013	0.01	0.01	0.001	0.025	294.869	0.887	2.75622
2011-06-06	4	0.047	0.013	0.002	0.004	0.006	0.002	0.013	0.012	0.007	0.001	0.026	294.616	0.895	2.88711
2011-06-06	5	0.04	0.014	0.002	0.004	0.006	0.002	0.013	0.012	0.007	0.002	0.026	294.394	0.894	2.78993
2011-06-06	6	0.036	0.016	0.003	0.004	0.006	0.002	0.013	0.012	0.008	0.002	0.026	294.218	0.886	2.75299
2011-06-06	7	0.035	0.016	0.004	0.004	0.006	0.002	0.013	0.012	0.008	0.002	0.027	295.022	0.889	2.59506
2011-06-06	8	0.033	0.02	0.01	0.004	0.006	0.002	0.013	0.012	0.01	0.003	0.027	298.127	0.766	2.24397
2011-06-06	9	0.046	0.047	0.018	0.002	0.005	0.001	0.011	0.009	0.021	0.002	0.028	300.552	0.66	1.5799
2011-06-06	10	0.035	0.069	0.023	0.001	0.004	0.001	0.007	0.006	0.025	0.002	0.024	303.206	0.53	1.41954
2011-06-06	11	0.028	0.077	0.025	0	0.003	0.001	0.005	0.004	0.024	0.001	0.02	305.513	0.425	0.597874
2011-06-06	12	0.032	0.063	0.024	0	0.002	0	0.005	0.003	0.025	0.001	0.02	307.425	0.358	0.516779
2011-06-06	13	0.039	0.052	0.024	0	0.002	0	0.005	0.003	0.029	0.001	0.021	309.388	0.298	0.901952
2011-06-06	14	0.043	0.044	0.023	0	0.002	0	0.005	0.003	0.03	0	0.022	310.515	0.265	0.938783
2011-06-06	15	0.047	0.038	0.021	0	0.002	0	0.005	0.003	0.03	0	0.022	310.491	0.26	0.984686
2011-06-06	16	0.054	0.037	0.02	0	0.002	0	0.004	0.003	0.028	0	0.02	310.078	0.265	1.1427
2011-06-06	17	0.063	0.039	0.019	0	0.002	0	0.005	0.003	0.025	0	0.019	309.257	0.276	1.31038
2011-06-06	18	0.074	0.042	0.017	0	0.002	0	0.005	0.003	0.023	0	0.018	308.095	0.308	1.40409
2011-06-06	19	0.075	0.042	0.011	0.001	0.002	0.001	0.006	0.004	0.019	0	0.018	305.599	0.389	1.73417
2011-06-06	20	0.072	0.04	0.008	0.002	0.003	0.001	0.006	0.005	0.016	0	0.018	302.734	0.385	1.62472
2011-06-06	21	0.077	0.04	0.006	0.003	0.003	0.001	0.007	0.006	0.012	0.001	0.018	300.909	0.399	1.61541
2011-06-06	22	0.074	0.041	0.005	0.004	0.004	0.001	0.008	0.008	0.008	0.001	0.019	299.605	0.438	1.68961
2011-06-06	23	0.065	0.04	0.004	0.005	0.004	0.002	0.009	0.01	0.005	0.001	0.02	298.378	0.527	2.44722
2011-06-06	24	0.054	0.038	0.003	0.005	0.004	0.002	0.01	0.011	0.003	0.001	0.021	297.42	0.625	2.72186
2011-07-06	1	0.04	0.04	0.002	0.005	0.004	0.002	0.009	0.012	0.003	0.001	0.022	296.65	0.695	2.49885
2011-07-06	2	0.027	0.039	0.002	0.005	0.004	0.002	0.009	0.011	0.004	0.001	0.022	296.14	0.733	2.15292
2011-07-06	3	0.02	0.037	0.002	0.005	0.004	0.002	0.007	0.011	0.007	0.001	0.021	295.919	0.742	2.03477
2011-07-06	4	0.015	0.036	0.002	0.005	0.004	0.002	0.006	0.01	0.01	0.001	0.021	295.804	0.743	1.77123
2011-07-06	5	0.01	0.033	0.002	0.005	0.003	0.001	0.005	0.008	0.014	0.001	0.02	295.753	0.74	1.64309
2011-07-06	6	0.009	0.026	0.001	0.005	0.003	0.001	0.003	0.007	0.016	0.001	0.019	295.773	0.738	1.64419
2011-07-06	7	0.01	0.017	0.002	0.004	0.002	0.001	0.003	0.006	0.016	0	0.018	296.5	0.758	1.71544
2011-07-06	8	0.012	0.01	0.003	0.003	0.002	0.001	0.003	0.006	0.015	0	0.017	299.752	0.661	1.74821
2011-07-06	9	0.01	0.01	0.006	0.002	0.002	0.001	0.002	0.004	0.015	0.001	0.014	302.083	0.582	1.63415
2011-07-06	10	0.01	0.014	0.01	0.001	0.002	0	0.002	0.002	0.016	0.001	0.012	304.184	0.517	1.48182
2011-07-06	11	0.009	0.009	0.011	0.001	0.001	0	0.001	0.001	0.014	0	0.01	306.374	0.453	1.52654
2011-07-06	12	0.008	0.006	0.01	0	0.001	0	0.001	0.001	0.012	0	0.008	307.988	0.41	-0.559361
2011-07-06	13	0.004	0.003	0.008	0	0.001	0	0.001	0.001	0.013	0	0.008	306.804	0.436	-0.742556
2011-07-06	14	0.005	0.001	0.005	0	0	0	0.001	0.001	0.012	0	0.007	306.419	0.45	-0.265572
2011-07-06	15	0.009	0.001	0.004	0.001	0	0	0.001	0.001	0.013	0	0.008	307.113	0.426	1.79815
2011-07-06	16	0.011	0.001	0.003	0.001	0	0	0.001	0.001	0.013	0	0.008	305.158	0.502	1.77779
2011-07-06	17	0.014	0	0.002	0.001	0.001	0	0.001	0.001	0.013	0	0.008	306.346	0.468	1.90611
2011-07-06	18	0.016	0.001	0.003	0.001	0.001	0	0.001	0.001	0.014	0	0.008	305.676	0.437	1.76757
2011-07-06	19	0.016	0.001	0.003	0.002	0.001	0	0.001	0.001	0.014	0	0.009	303.638	0.461	1.64684
2011-07-06	20	0.017	0.001	0.002	0.002	0.001	0	0.001	0.001	0.015	0	0.01	301.913	0.388	1.58283
2011-07-06	21	0.022	0.001	0.002	0.003	0.001	0	0.002	0.001	0.015	0	0.01	300.619	0.388	1.53778
2011-07-06	22	0.023	0.001	0.003	0.003	0.001	0	0.002	0.001	0.015	0	0.011	299.531	0.43	1.42548
2011-07-06	23	0.022	0.002	0.003	0.002	0.001	0	0.002	0.001	0.016	0	0.011	298.646	0.492	1.4089
2011-07-06	24	0.02	0.002	0.003	0.002	0.002	0	0.002	0.001	0.016	0	0.011	297.839	0.57	1.47072
2011-08-06	1	0.02	0.003	0.003	0.002	0.002	0.001	0.002	0.001	0.015	0	0.011	297.104	0.656	1.63715
2011-08-06	2	0.02	0.003	0.003	0.002	0.002	0.001	0.002	0.002	0.015	0	0.012	296.567	0.717	1.65216
2011-08-06	3	0.021	0.003	0.002	0.002	0.002	0.001	0.002	0.002	0.014	0	0.012	296.214	0.751	1.73704
2011-08-06	4	0.021	0.003	0.002	0.002	0.002	0.001	0.003	0.002	0.013	0	0.012	295.927	0.778	1.78732
2011-08-06	5	0.022	0.002	0.002	0.002	0.002	0.001	0.003	0.002	0.013	0	0.012	295.683	0.803	1.7984
2011-08-06	6	0.024	0.002	0.002	0.002	0.002	0.001	0.003	0.003	0.012	0	0.012	295.536	0.828	1.84301
2011-08-06	7	0.028	0.002	0.003	0.002	0.003	0.001	0.003	0.003	0.012	0	0.012	296.468	0.838	1.84678
2011-08-06	8	0.025	0.003	0.005	0.001	0.003	0.001	0.003	0.003	0.012	0	0.012	298.348	0.782	1.74848
2011-08-06	9	0.019	0.012	0.008	0.001	0.003	0.001	0.003	0.002	0.018	0.001	0.015	300.236	0.712	1.58936
2011-08-06	10	0.011	0.017	0.017	0.001	0.002	0.001	0.002	0.002	0.022	0.001	0.015	302.111	0.636	1.441
2011-08-06	11	0.004	0.019	0.027	0	0.002	0	0.002	0.002	0.025	0.001	0.016	303.776	0.571	-1.22931
2011-08-06	12	0.004	0.016	0.025	0	0.001	0	0.001	0.002	0.022	0	0.015	305.3	0.522	-1.36834
2011-08-06	13	0.003	0.01	0.017	0	0.001	0	0.001	0.001	0.018	0	0.012	306.496	0.483	-1.33557
2011-08-06	14	0.003	0.006	0.012	0	0.001	0	0.001	0.001	0.015	0	0.011	306.787	0.474	-0.7623
2011-08-06	15	0.002	0.004	0.009	0	0	0	0.001	0.001	0.014	0	0.01	306.161	0.489	-0.774209
2011-08-06	16	0.002	0.007	0.008	0	0	0	0	0.001	0.014	0	0.01	305.16	0.52	-0.734379
2011-08-06	17	0.003	0.014	0.008	0	0.001	0	0.001	0.001	0.015	0	0.011	303.78	0.565	-0.592535
2011-08-06	18	0.002	0.023	0.007	0	0.001	0	0.001	0.001	0.018	0	0.012	302.318	0.613	-0.484286
2011-08-06	19	0.002	0.025	0.006	0.001	0.001	0	0.001	0.001	0.021	0	0.015	300.808	0.667	-0.375136
2011-08-06	20	0.001	0.022	0.004	0.001	0.001	0	0.001	0.001	0.026	0	0.021	299.173	0.723	-0.21535
2011-08-06	21	0.001	0.019	0.004	0.001	0.001	0	0.001	0.001	0.03	0	0.029	298.039	0.777	-0.00915554
2011-08-06	22	0	0.015	0.003	0.001	0.001	0	0.001	0.001	0.031	0	0.039	297.272	0.816	-0.142609
2011-08-06	23	0	0.012	0.002	0.001	0.001	0	0.001	0.001	0.032	0	0.046	296.644	0.852	-0.186284
2011-08-06	24	0	0.012	0.002	0.001	0.001	0	0.001	0.001	0.032	0	0.05	296.07	0.893	-0.134788
2011-09-06	1	0	0.013	0.002	0	0.001	0	0.001	0.001	0.033	0	0.047	295.499	0.941	0.101073
2011-09-06	2	0.001	0.014	0.002	0	0.001	0	0.002	0.001	0.045	0	0.045	295.003	0.97	0.557112
2011-09-06	3	0.002	0.014	0.002	0	0.002	0	0.003	0.001	0.055	0	0.041	294.713	0.984	0.962435
2011-09-06	4	0.004	0.012	0.001	0.001	0.002	0	0.004	0.001	0.061	0	0.037	294.497	0.99	1.52378
2011-09-06	5	0.013	0.007	0.001	0.001	0.003	0	0.005	0.002	0.062	0	0.036	294.345	0.99	2.59917
2011-09-06	6	0.016	0.007	0.001	0.001	0.003	0	0.005	0.002	0.061	0.001	0.036	294.515	0.981	2.38261
2011-09-06	7	0.023	0.01	0.002	0.001	0.004	0	0.006	0.002	0.06	0.001	0.037	294.864	0.956	2.23353
2011-09-06	8	0.029	0.027	0.005	0.001	0.004	0	0.006	0.002	0.048	0.001	0.03	296.78	0.862	1.66927
2011-09-06	9	0.019	0.065	0.011	0	0.002	0	0.004	0.002	0.028	0.001	0.018	299.036	0.758	1.04249
2011-09-06	10	0.011	0.064	0.012	0	0.002	0	0.003	0.001	0.023	0	0.015	301.256	0.655	0.09169
2011-09-06	11	0.006	0.058	0.011	0	0.001	0	0.002	0.001	0.02	0	0.012	303.216	0.571	-0.473363
2011-09-06	12	0.005	0.039	0.009	0	0.001	0	0.001	0.001	0.017	0	0.01	305.155	0.491	-0.584726
2011-09-06	13	0.008	0.025	0.008	0	0.001	0	0.001	0.001	0.015	0	0.009	306.771	0.433	-0.166587
2011-09-06	14	0.01	0.019	0.008	0	0.001	0	0.001	0.001	0.015	0	0.009	307.544	0.412	0.0339752
2011-09-06	15	0.008	0.01	0.008	0	0	0	0.001	0.001	0.017	0	0.01	305.063	0.488	-0.237583
2011-09-06	16	0.009	0.003	0.006	0	0.001	0	0.001	0.001	0.017	0	0.01	303.707	0.552	0.20406
2011-09-06	17	0.013	0.003	0.005	0.001	0.001	0	0.002	0.001	0.016	0	0.01	304.165	0.556	1.68871
2011-09-06	18	0.02	0.005	0.004	0.001	0.001	0	0.002	0.001	0.014	0	0.01	304.135	0.579	1.74898
2011-09-06	19	0.026	0.009	0.004	0.001	0.001	0	0.003	0.001	0.012	0	0.01	303.518	0.601	1.77946
2011-09-06	20	0.035	0.012	0.004	0.001	0.001	0	0.003	0.002	0.011	0	0.01	302.031	0.567	1.69353
2011-09-06	21	0.049	0.015	0.005	0.001	0.002	0	0.004	0.002	0.01	0	0.01	300.747	0.556	1.62179
2011-09-06	22	0.059	0.018	0.006	0.001	0.002	0	0.005	0.003	0.008	0	0.011	299.675	0.59	1.61012
2011-09-06	23	0.064	0.019	0.006	0.001	0.002	0.001	0.006	0.003	0.007	0	0.011	298.716	0.647	2.06712
2011-09-06	24	0.061	0.02	0.005	0.001	0.003	0.001	0.007	0.004	0.005	0	0.012	297.936	0.71	2.36686
2011-10-06	1	0.056	0.019	0.005	0.002	0.003	0.001	0.008	0.004	0.004	0	0.012	297.242	0.774	2.61203
2011-10-06	2	0.04	0.018	0.005	0.002	0.003	0.001	0.007	0.005	0.004	0.001	0.013	296.778	0.808	2.37896
2011-10-06	3	0.03	0.017	0.005	0.002	0.003	0.001	0.007	0.006	0.004	0.001	0.013	296.617	0.799	2.53353
2011-10-06	4	0.025	0.016	0.005	0.002	0.003	0.001	0.006	0.007	0.002	0.001	0.014	296.428	0.797	2.2187
2011-10-06	5	0.024	0.018	0.005	0.002	0.003	0.001	0.006	0.009	0.001	0.001	0.014	296.247	0.8	2.96413
2011-10-06	6	0.025	0.019	0.005	0.002	0.004	0.001	0.006	0.01	0.001	0.001	0.014	296.366	0.775	3.01913
2011-10-06	7	0.027	0.02	0.007	0.002	0.004	0.002	0.006	0.011	0.001	0.001	0.014	297.262	0.773	3.30516
2011-10-06	8	0.028	0.02	0.015	0.002	0.004	0.002	0.006	0.011	0.001	0.001	0.014	299.99	0.701	3.3191
2011-10-06	9	0.04	0.059	0.02	0.001	0.003	0.001	0.004	0.007	0.007	0.001	0.015	301.915	0.623	1.5829
2011-10-06	10	0.017	0.066	0.017	0	0.001	0	0.001	0.003	0.022	0	0.015	303.659	0.544	0.0651061
2011-10-06	11	0.004	0.047	0.014	0	0.001	0	0.001	0.001	0.027	0	0.016	305.018	0.506	-0.941561
2011-10-06	12	0.002	0.023	0.011	0	0	0	0.001	0.001	0.023	0	0.018	304.352	0.541	-0.490603
2011-10-06	13	0.001	0.008	0.008	0	0	0	0	0.001	0.02	0	0.018	303.478	0.611	-0.0947556
2011-10-06	14	0.001	0.006	0.006	0.001	0	0	0	0.001	0.019	0	0.018	304.022	0.624	-0.0422611
2011-10-06	15	0.001	0.006	0.006	0.001	0	0	0	0.001	0.021	0	0.018	305.916	0.497	-0.180939
2011-10-06	16	0.001	0.007	0.007	0.001	0	0	0	0.001	0.019	0	0.018	305.924	0.471	0.0112538
2011-10-06	17	0.001	0.01	0.007	0	0	0	0	0.001	0.02	0	0.018	304.79	0.485	-0.0731962
2011-10-06	18	0.001	0.014	0.006	0.001	0	0	0.001	0.001	0.024	0	0.018	303.3	0.518	-0.549063
2011-10-06	19	0.001	0.02	0.006	0.001	0	0	0.001	0.001	0.026	0	0.019	301.541	0.57	-0.561103
2011-10-06	20	0.002	0.027	0.005	0.001	0.001	0	0.001	0.001	0.028	0	0.019	299.719	0.607	-0.440329
2011-10-06	21	0.002	0.036	0.004	0.001	0.001	0	0.001	0.001	0.028	0	0.019	298.367	0.666	-0.328159
2011-10-06	22	0.002	0.041	0.004	0.001	0.001	0	0.001	0.001	0.029	0	0.019	297.873	0.675	-0.278325
2011-10-06	23	0.003	0.042	0.005	0.001	0.001	0	0.001	0.001	0.031	0	0.019	297.328	0.707	-0.142482
2011-10-06	24	0.004	0.042	0.008	0.001	0.001	0	0.002	0.001	0.033	0	0.019	296.9	0.748	1.39969
2011-11-06	1	0.008	0.044	0.012	0.001	0.002	0	0.002	0.001	0.031	0	0.019	296.447	0.8	1.36522
2011-11-06	2	0.012	0.044	0.016	0.001	0.002	0	0.003	0.002	0.029	0.001	0.019	296.117	0.831	1.34452
2011-11-06	3	0.017	0.042	0.018	0.001	0.002	0.001	0.003	0.002	0.026	0.001	0.018	295.834	0.848	1.47437
2011-11-06	4	0.021	0.041	0.017	0	0.003	0.001	0.004	0.003	0.023	0.001	0.018	295.594	0.857	1.28219
2011-11-06	5	0.022	0.041	0.015	0.001	0.003	0.001	0.005	0.003	0.021	0.001	0.018	295.351	0.863	1.73339
2011-11-06	6	0.022	0.042	0.012	0.001	0.004	0.001	0.005	0.004	0.018	0.001	0.018	295.281	0.861	1.77976
2011-11-06	7	0.027	0.047	0.014	0.001	0.004	0.001	0.006	0.004	0.016	0.001	0.017	295.767	0.859	1.94213
2011-11-06	8	0.052	0.07	0.021	0.001	0.004	0.001	0.005	0.004	0.015	0.002	0.016	297.92	0.785	1.94992
2011-11-06	9	0.077	0.091	0.019	0	0.003	0	0.004	0.003	0.016	0.001	0.014	300.462	0.688	1.95077
2011-11-06	10	0.076	0.093	0.018	0	0.002	0	0.002	0.002	0.018	0	0.012	303.406	0.569	1.74461
2011-11-06	11	0.062	0.081	0.023	0	0.001	0	0.001	0.001	0.019	0	0.011	306.077	0.468	1.55211
2011-11-06	12	0.036	0.039	0.019	0	0	0	0.001	0.001	0.018	0	0.01	307.962	0.412	1.14557
2011-11-06	13	0.009	0.015	0.014	0	0	0	0	0	0.023	0	0.012	307.068	0.425	-0.207729
2011-11-06	14	0.003	0.003	0.007	0	0	0	0	0	0.018	0	0.011	305.747	0.495	0.183837
2011-11-06	15	0.004	0.001	0.005	0	0	0	0	0	0.018	0	0.011	306.621	0.471	-0.452215
2011-11-06	16	0.003	0.001	0.004	0	0	0	0.001	0	0.017	0	0.01	304.354	0.57	-0.532015
2011-11-06	17	0.003	0.001	0.003	0	0	0	0	0	0.014	0	0.009	302.537	0.675	0.375976
2011-11-06	18	0.003	0.001	0.003	0	0	0	0	0	0.014	0	0.009	301.533	0.767	0.574715
2011-11-06	19	0.003	0.006	0.004	0	0	0	0.001	0	0.016	0	0.01	300.768	0.795	-0.0915038
2011-11-06	20	0.003	0.017	0.005	0.001	0.001	0	0.001	0.001	0.023	0	0.015	299.502	0.747	-0.181537
2011-11-06	21	0.008	0.022	0.004	0.001	0.001	0	0.001	0.001	0.03	0	0.017	298.169	0.764	1.59436
2011-11-06	22	0.016	0.025	0.005	0.001	0.001	0	0.001	0.001	0.029	0	0.017	297.185	0.79	1.56387
2011-11-06	23	0.02	0.026	0.005	0.001	0.001	0	0.002	0.002	0.026	0	0.016	296.447	0.822	1.59311
2011-11-06	24	0.022	0.026	0.004	0.001	0.002	0	0.003	0.002	0.02	0	0.015	295.876	0.855	1.71281
2011-12-06	1	0.022	0.023	0.004	0.001	0.002	0.001	0.004	0.003	0.015	0	0.014	295.363	0.89	1.89056
2011-12-06	2	0.019	0.02	0.004	0.001	0.003	0.001	0.004	0.004	0.01	0	0.013	294.992	0.91	2.05545
2011-12-06	3	0.017	0.018	0.005	0.001	0.003	0.001	0.005	0.005	0.007	0	0.013	294.712	0.917	2.21986
2011-12-06	4	0.017	0.019	0.006	0.001	0.003	0.001	0.005	0.005	0.005	0.001	0.012	294.484	0.921	2.33997
2011-12-06	5	0.018	0.02	0.007	0.001	0.003	0.001	0.005	0.006	0.004	0.001	0.012	294.274	0.924	2.56505
2011-12-06	6	0.02	0.021	0.007	0.001	0.003	0.001	0.005	0.006	0.003	0.001	0.012	294.192	0.924	2.58464
2011-12-06	7	0.026	0.022	0.009	0.001	0.003	0.001	0.005	0.006	0.004	0.002	0.012	295.097	0.924	2.64581
2011-12-06	8	0.025	0.02	0.015	0.001	0.004	0.001	0.005	0.006	0.003	0.002	0.012	297.68	0.833	2.52668
2011-12-06	9	0.018	0.088	0.035	0	0.003	0.001	0.003	0.004	0.009	0.001	0.012	299.654	0.753	-0.72766
2011-12-06	10	0.015	0.081	0.029	0	0.002	0	0.002	0.003	0.013	0	0.011	301.784	0.666	-0.812298
2011-12-06	11	0.02	0.076	0.028	0	0.001	0	0.001	0.002	0.017	0	0.012	303.598	0.583	-0.669477
2011-12-06	12	0.01	0.022	0.017	0	0.001	0	0.001	0.001	0.024	0	0.013	303.553	0.574	-0.449016
2011-12-06	13	0.005	0.002	0.007	0	0	0	0	0.001	0.02	0	0.011	304.455	0.543	-0.45239
2011-12-06	14	0.005	0	0.004	0	0	0	0	0	0.012	0	0.006	304.355	0.571	-0.123069
2011-12-06	15	0.005	0	0.002	0.001	0	0	0	0	0.009	0	0.005	304.153	0.569	-0.204095
2011-12-06	16	0.006	0	0.002	0.001	0	0	0	0	0.007	0	0.004	305.453	0.498	-0.293454
2011-12-06	17	0.006	0	0.003	0.001	0	0	0	0	0.007	0	0.004	304.93	0.508	-0.263185
2011-12-06	18	0.007	0	0.002	0.001	0	0	0	0	0.007	0	0.004	304.061	0.519	-0.15424
2011-12-06	19	0.011	0.001	0.002	0	0	0	0.001	0	0.006	0	0.004	303.339	0.519	0.374222
2011-12-06	20	0.019	0.001	0.002	0	0	0	0.001	0	0.006	0	0.004	301.147	0.579	0.822496
2011-12-06	21	0.028	0.001	0.002	0	0	0	0.001	0.001	0.006	0	0.004	299.463	0.62	1.26486
2011-12-06	22	0.032	0.001	0.003	0	0	0	0.001	0.001	0.007	0	0.005	298.179	0.668	1.3985
2011-12-06	23	0.033	0.001	0.003	0	0	0	0.001	0.001	0.007	0	0.005	297.152	0.724	1.53003
2011-12-06	24	0.031	0.002	0.003	0	0.001	0	0.001	0.001	0.008	0	0.005	296.294	0.786	1.71214
06/13/2011	1	0.029	0.002	0.004	0	0.001	0	0.001	0.001	0.008	0	0.006	295.56	0.852	1.7859
06/13/2011	2	0.027	0.003	0.004	0	0.001	0	0.002	0.001	0.009	0	0.007	295.084	0.888	1.92212
06/13/2011	3	0.026	0.004	0.005	0	0.001	0	0.002	0.002	0.009	0	0.008	294.838	0.897	1.94968
06/13/2011	4	0.025	0.004	0.005	0	0.001	0.001	0.002	0.002	0.009	0	0.009	294.681	0.896	1.99051
06/13/2011	5	0.025	0.006	0.006	0	0.002	0.001	0.003	0.003	0.009	0	0.01	294.568	0.893	2.06415
06/13/2011	6	0.026	0.007	0.006	0.001	0.002	0.001	0.003	0.004	0.009	0	0.012	294.569	0.886	2.03857
06/13/2011	7	0.031	0.009	0.009	0.001	0.003	0.001	0.004	0.005	0.009	0.001	0.013	295.581	0.878	2.19238
06/13/2011	8	0.03	0.01	0.015	0.001	0.003	0.001	0.005	0.005	0.008	0.001	0.013	298.714	0.79	1.95577
06/13/2011	9	0.026	0.058	0.034	0	0.004	0.001	0.004	0.005	0.01	0.001	0.015	300.97	0.695	-0.328975
06/13/2011	10	0.011	0.103	0.037	0	0.003	0	0.002	0.003	0.016	0	0.014	303.211	0.592	-1.30446
06/13/2011	11	0.005	0.062	0.027	0	0.001	0	0.001	0.001	0.014	0	0.01	304.673	0.522	-1.5362
06/13/2011	12	0.005	0.034	0.018	0	0.001	0	0.001	0.001	0.012	0	0.008	306.395	0.461	-1.39509
06/13/2011	13	0.005	0.018	0.013	0	0	0	0.001	0.001	0.013	0	0.008	308.68	0.391	-1.26523
06/13/2011	14	0.006	0.008	0.011	0	0	0	0.001	0.001	0.013	0	0.008	309.744	0.36	-1.03603
06/13/2011	15	0.01	0.006	0.009	0	0.001	0	0.001	0.001	0.012	0	0.008	309.229	0.372	-0.142063
06/13/2011	16	0.012	0.006	0.008	0	0.001	0	0.001	0.002	0.011	0	0.008	308.48	0.401	0.341343
06/13/2011	17	0.013	0.006	0.007	0	0.001	0	0.001	0.001	0.01	0	0.008	307.266	0.439	0.153849
06/13/2011	18	0.014	0.009	0.005	0.001	0.001	0	0.001	0.002	0.008	0	0.007	306.003	0.482	1.72523
06/13/2011	19	0.016	0.009	0.003	0.001	0.001	0	0.001	0.002	0.006	0	0.006	304.331	0.56	1.81018
06/13/2011	20	0.014	0.006	0.002	0.002	0.001	0	0.002	0.003	0.005	0	0.007	302.379	0.601	1.90454
06/13/2011	21	0.012	0.005	0.002	0.002	0.001	0.001	0.002	0.003	0.003	0	0.007	301.162	0.608	2.153
06/13/2011	22	0.011	0.004	0.001	0.003	0.001	0.001	0.002	0.003	0.002	0	0.007	299.92	0.646	2.15603
06/13/2011	23	0.01	0.003	0.001	0.003	0.001	0.001	0.002	0.004	0.001	0	0.007	298.782	0.671	2.21809
06/13/2011	24	0.012	0.003	0.002	0.003	0.001	0.001	0.003	0.004	0	0	0.007	297.924	0.701	3.10456
06/14/2011	1	0.014	0.003	0.002	0.003	0.001	0.001	0.003	0.005	0	0	0.007	297.019	0.746	3.04687
06/14/2011	2	0.015	0.003	0.002	0.003	0.001	0.001	0.003	0.005	0	0	0.007	296.372	0.777	3.04138
06/14/2011	3	0.015	0.003	0.002	0.002	0.002	0.001	0.003	0.005	0	0.001	0.008	295.994	0.789	2.92586
06/14/2011	4	0.018	0.004	0.003	0.002	0.002	0.001	0.003	0.006	0	0.001	0.008	295.714	0.799	2.99337
06/14/2011	5	0.022	0.005	0.003	0.002	0.002	0.001	0.004	0.006	0	0.001	0.008	295.489	0.808	3.29231
06/14/2011	6	0.028	0.006	0.003	0.001	0.002	0.001	0.004	0.007	0	0.001	0.008	295.361	0.816	3.35581
06/14/2011	7	0.036	0.006	0.005	0.001	0.002	0.001	0.004	0.007	0	0.001	0.008	296.248	0.827	3.3379
06/14/2011	8	0.03	0.007	0.006	0.001	0.002	0.001	0.004	0.007	0	0.001	0.008	298.858	0.763	3.38265
06/14/2011	9	0.031	0.034	0.02	0.001	0.002	0.001	0.003	0.005	0.003	0.001	0.009	301.31	0.66	2.29243
06/14/2011	10	0.023	0.066	0.026	0	0.002	0	0.002	0.003	0.011	0.001	0.01	303.73	0.555	-0.185379
06/14/2011	11	0.012	0.052	0.019	0	0.001	0	0.001	0.002	0.012	0	0.009	305.595	0.475	-0.915296
06/14/2011	12	0.009	0.032	0.014	0	0.001	0	0.001	0.001	0.011	0	0.008	307.414	0.404	-1.03297
06/14/2011	13	0.01	0.023	0.012	0	0.001	0	0.001	0.001	0.011	0	0.008	309.195	0.344	-0.748199
06/14/2011	14	0.011	0.019	0.011	0	0.001	0	0.001	0.001	0.012	0	0.009	310.239	0.311	-0.628233
06/14/2011	15	0.014	0.016	0.01	0	0.001	0	0.001	0.001	0.012	0	0.009	310.206	0.305	-0.0248087
06/14/2011	16	0.016	0.012	0.009	0	0.001	0	0.001	0.001	0.012	0	0.008	309.78	0.314	0.443053
06/14/2011	17	0.013	0.008	0.008	0	0.001	0	0.001	0.002	0.013	0	0.009	306.955	0.393	0.342348
06/14/2011	18	0.01	0.005	0.005	0.001	0.001	0	0.001	0.002	0.013	0	0.009	304.495	0.497	1.63045
06/14/2011	19	0.015	0.004	0.003	0.001	0.001	0	0.001	0.002	0.013	0	0.009	304.072	0.456	1.68783
06/14/2011	20	0.022	0.006	0.004	0.002	0.001	0	0.002	0.002	0.013	0	0.009	302.336	0.478	1.59473
06/14/2011	21	0.03	0.008	0.005	0.001	0.001	0	0.002	0.003	0.011	0	0.009	300.942	0.487	1.50716
06/14/2011	22	0.037	0.01	0.006	0.001	0.001	0.001	0.002	0.003	0.01	0	0.01	299.894	0.515	1.61313
06/14/2011	23	0.043	0.012	0.008	0.001	0.001	0.001	0.002	0.003	0.01	0.001	0.01	298.764	0.587	1.48481
06/14/2011	24	0.041	0.012	0.009	0.001	0.001	0.001	0.003	0.003	0.011	0.001	0.01	297.538	0.693	1.71792
06/15/2011	1	0.032	0.01	0.008	0.001	0.001	0.001	0.003	0.002	0.014	0	0.011	296.413	0.808	1.75314
06/15/2011	2	0.021	0.009	0.006	0.001	0.001	0	0.002	0.002	0.017	0	0.012	295.837	0.861	1.61862
06/15/2011	3	0.015	0.008	0.005	0.001	0.002	0	0.002	0.002	0.02	0	0.014	295.697	0.859	1.6424
06/15/2011	4	0.011	0.006	0.004	0.001	0.002	0	0.002	0.001	0.022	0	0.015	295.448	0.881	1.71958
06/15/2011	5	0.01	0.005	0.003	0.001	0.002	0	0.002	0.001	0.024	0	0.015	295.362	0.888	1.79953
06/15/2011	6	0.011	0.004	0.002	0.001	0.002	0	0.002	0.001	0.024	0	0.015	295.231	0.908	1.92812
06/15/2011	7	0.014	0.003	0.002	0.001	0.002	0	0.002	0.001	0.024	0	0.015	296.386	0.886	1.91755
06/15/2011	8	0.013	0.003	0.003	0.001	0.002	0	0.002	0.001	0.022	0	0.014	298.593	0.838	1.80287
06/15/2011	9	0.01	0.01	0.005	0.001	0.003	0	0.002	0.001	0.021	0	0.014	300.779	0.738	1.6673
06/15/2011	10	0.01	0.029	0.009	0	0.003	0	0.002	0.001	0.022	0	0.015	303.005	0.636	0.0694707
06/15/2011	11	0.015	0.034	0.016	0	0.002	0	0.001	0.001	0.019	0.001	0.013	305.06	0.549	-0.36869
06/15/2011	12	0.016	0.028	0.022	0	0.002	0	0.001	0.001	0.017	0.001	0.011	307.087	0.478	-0.713189
06/15/2011	13	0.003	0.009	0.015	0	0.001	0	0.001	0.001	0.018	0	0.013	305.492	0.491	-0.689678
06/15/2011	14	0.001	0.001	0.006	0	0	0	0	0.001	0.013	0	0.011	306.427	0.458	-0.451773
06/15/2011	15	0.002	0	0.003	0.001	0	0	0	0	0.013	0	0.009	305.772	0.501	-0.756336
06/15/2011	16	0.003	0	0.002	0	0	0	0	0	0.011	0	0.008	305.412	0.495	-0.258103
06/15/2011	17	0.003	0	0.001	0	0	0	0	0	0.01	0	0.006	304.156	0.508	-0.544573
06/15/2011	18	0.007	0	0.001	0.001	0	0	0	0	0.01	0	0.005	303.036	0.591	0.060054
06/15/2011	19	0.009	0	0.001	0.001	0	0	0	0	0.011	0	0.006	302.281	0.498	-0.00828531
06/15/2011	20	0.01	0.001	0.001	0.002	0.001	0	0.001	0	0.013	0	0.008	300.357	0.572	1.75613
06/15/2011	21	0.009	0.001	0.001	0.003	0.001	0	0.001	0	0.014	0	0.008	299.67	0.588	1.71078
06/15/2011	22	0.01	0.001	0.001	0.003	0.001	0	0.001	0.001	0.015	0	0.009	299.883	0.53	1.67686
06/15/2011	23	0.01	0.001	0.001	0.003	0.001	0	0.001	0.001	0.015	0	0.009	299.016	0.578	1.67271
06/15/2011	24	0.004	0	0.001	0.002	0.001	0	0.001	0	0.016	0	0.01	297.648	0.67	1.71734
06/16/2011	1	0.001	0	0.001	0.001	0.001	0	0.001	0	0.016	0	0.012	297.036	0.704	-0.35894
06/16/2011	2	0.001	0.001	0.002	0.001	0.001	0	0.001	0	0.019	0	0.014	296.781	0.703	-0.372028
06/16/2011	3	0.002	0.003	0.003	0.002	0.001	0	0.001	0.001	0.023	0	0.015	296.38	0.724	-0.184479
06/16/2011	4	0.003	0.006	0.004	0.003	0.003	0	0.001	0.001	0.026	0	0.016	296.261	0.722	1.44318
06/16/2011	5	0.003	0.005	0.004	0.003	0.002	0	0.001	0.001	0.02	0.001	0.014	296.05	0.722	-0.145135
06/16/2011	6	0.002	0.003	0.004	0.002	0.002	0	0.001	0.001	0.019	0.001	0.014	295.829	0.725	-0.196139
06/16/2011	7	0.002	0.003	0.004	0.002	0.002	0	0.001	0.002	0.018	0.001	0.013	295.984	0.764	-0.0833977
06/16/2011	8	0.003	0.004	0.004	0.002	0.002	0	0.001	0.002	0.017	0.001	0.012	298.09	0.706	1.48531
06/16/2011	9	0.002	0.004	0.005	0.001	0.002	0	0.001	0.001	0.012	0.001	0.009	299.344	0.661	1.46569
06/16/2011	10	0.002	0.002	0.004	0.001	0.001	0	0.001	0.001	0.009	0	0.007	300.731	0.633	-0.473585
06/16/2011	11	0.002	0.002	0.005	0.001	0.001	0	0.001	0.001	0.01	0.001	0.007	303.051	0.585	1.59223
06/16/2011	12	0.001	0.003	0.006	0	0.001	0	0	0.001	0.01	0	0.007	305.156	0.519	-0.750635
06/16/2011	13	0.001	0.002	0.006	0	0	0	0	0	0.009	0	0.007	306.854	0.485	0.069948
06/16/2011	14	0.002	0.001	0.004	0	0	0	0	0	0.008	0	0.006	305.871	0.497	-0.317588
06/16/2011	15	0.006	0	0.003	0	0	0	0	0	0.006	0	0.003	305.145	0.531	-0.180514
06/16/2011	16	0.008	0	0.002	0	0	0	0	0	0.004	0	0.002	305.085	0.504	-0.115584
06/16/2011	17	0.007	0	0.001	0	0	0	0	0	0.003	0	0.001	304.527	0.475	-0.138901
06/16/2011	18	0.011	0	0.001	0	0	0	0	0	0.002	0	0.001	303.28	0.463	0.00970784
06/16/2011	19	0.019	0	0.001	0	0	0	0	0	0.002	0	0.001	302.127	0.518	0.38707
06/16/2011	20	0.026	0	0.001	0	0	0	0	0	0.002	0	0.001	300.886	0.563	0.629971
06/16/2011	21	0.024	0	0.001	0	0	0	0	0	0.001	0	0.001	299.697	0.617	0.716691
06/16/2011	22	0.016	0	0.001	0	0	0	0	0	0.001	0	0.001	299.23	0.635	0.578558
06/16/2011	23	0.01	0	0.001	0	0	0	0	0	0.001	0	0.001	298.761	0.679	0.464748
06/16/2011	24	0.007	0	0	0	0	0	0	0	0.001	0	0.001	298.039	0.761	0.262396
06/17/2011	1	0.003	0	0	0	0	0	0	0	0.002	0	0.001	297.288	0.858	0.3457
06/17/2011	2	0.002	0	0	0	0	0	0	0	0.003	0	0.002	296.824	0.919	0.443686
06/17/2011	3	0.003	0	0	0	0	0	0	0	0.003	0	0.002	296.623	0.921	0.527372
06/17/2011	4	0.004	0	0	0	0	0	0	0	0.002	0	0.001	296.453	0.925	0.691678
06/17/2011	5	0.005	0	0	0	0	0	0	0	0.001	0	0.001	296.456	0.906	0.595165
06/17/2011	6	0.007	0	0	0	0.001	0	0	0	0.001	0	0.001	296.49	0.911	1.43149
06/17/2011	7	0.007	0	0	0	0.001	0	0	0	0.001	0	0.001	297.599	0.862	1.14941
06/17/2011	8	0.005	0.001	0.001	0	0	0	0	0	0.002	0	0.002	299.077	0.811	0.293227
06/17/2011	9	0.001	0.005	0.005	0	0	0	0	0	0.006	0	0.005	300.129	0.772	0.0652307
06/17/2011	10	0.001	0.014	0.012	0	0.001	0	0	0	0.008	0	0.006	301.047	0.728	-0.41548
06/17/2011	11	0.001	0.017	0.014	0	0.001	0	0	0	0.009	0	0.007	301.911	0.691	-0.457224
06/17/2011	12	0.001	0.014	0.013	0	0.001	0	0	0	0.009	0	0.007	302.395	0.669	-0.491521
06/17/2011	13	0.001	0.012	0.011	0	0	0	0	0	0.009	0	0.007	302.44	0.662	-0.0485519
06/17/2011	14	0.001	0.011	0.011	0	0	0	0	0	0.01	0	0.008	302.315	0.659	0.0117042
06/17/2011	15	0.001	0.009	0.011	0	0	0	0	0	0.01	0	0.01	302.297	0.657	0.218933
06/17/2011	16	0	0.008	0.012	0	0	0	0	0	0.01	0	0.012	302.163	0.656	-0.281016
06/17/2011	17	0	0.008	0.011	0	0	0	0	0	0.011	0	0.012	301.762	0.659	-0.123208
06/17/2011	18	0	0.009	0.01	0	0.001	0	0	0.001	0.012	0	0.013	301.027	0.674	-0.0546845
06/17/2011	19	0.001	0.015	0.007	0	0.001	0	0	0.001	0.014	0	0.014	299.993	0.699	-0.131116
06/17/2011	20	0.001	0.022	0.004	0.001	0.001	0	0.001	0.001	0.018	0	0.017	298.361	0.741	-0.120572
06/17/2011	21	0.001	0.024	0.003	0.001	0.001	0	0.001	0.001	0.023	0	0.019	297.516	0.763	-0.158673
06/17/2011	22	0.002	0.02	0.003	0.001	0.002	0	0.001	0.001	0.025	0	0.018	296.821	0.805	-0.0385555
06/17/2011	23	0.004	0.016	0.003	0.001	0.002	0	0.001	0.002	0.022	0	0.015	296.412	0.831	1.69404
06/17/2011	24	0.006	0.013	0.002	0.001	0.003	0	0.001	0.001	0.016	0	0.012	296.744	0.805	1.7546
06/18/2011	1	0.006	0.011	0.002	0.001	0.003	0.001	0.001	0.001	0.013	0	0.01	296.386	0.834	1.84632
06/18/2011	2	0.006	0.01	0.001	0.001	0.002	0.001	0.001	0.001	0.012	0	0.01	296.104	0.864	2.00352
06/18/2011	3	0.006	0.009	0.001	0.001	0.002	0.001	0.002	0.001	0.011	0	0.009	295.836	0.891	2.08002
06/18/2011	4	0.006	0.008	0.001	0.002	0.002	0.001	0.002	0.001	0.009	0	0.008	296.467	0.86	2.01717
06/18/2011	5	0.006	0.011	0.003	0.002	0.002	0.001	0.002	0.002	0.007	0	0.008	296.422	0.876	1.90289
06/18/2011	6	0.005	0.015	0.005	0.002	0.003	0.001	0.002	0.002	0.007	0.001	0.008	296.496	0.886	1.7898
06/18/2011	7	0.005	0.018	0.006	0.001	0.003	0.001	0.002	0.002	0.007	0.001	0.009	297.101	0.896	1.80273
06/18/2011	8	0.006	0.023	0.01	0.002	0.003	0	0.002	0.002	0.009	0.001	0.01	299.218	0.826	1.57543
06/18/2011	9	0.006	0.034	0.017	0.002	0.003	0	0.002	0.001	0.012	0.002	0.011	301.333	0.743	1.41829
06/18/2011	10	0.004	0.038	0.021	0.001	0.003	0	0.001	0.001	0.015	0.001	0.011	303.409	0.664	1.36695
06/18/2011	11	0.003	0.035	0.022	0.001	0.002	0	0.001	0.001	0.013	0.001	0.01	305.451	0.59	1.40464
06/18/2011	12	0.002	0.028	0.018	0.001	0.002	0	0.001	0.001	0.011	0.001	0.009	307.212	0.526	-0.702528
06/18/2011	13	0.002	0.022	0.016	0.001	0.001	0	0.001	0	0.01	0.001	0.009	307.5	0.487	-0.62227
06/18/2011	14	0.001	0.016	0.013	0.001	0.001	0	0	0	0.01	0	0.009	308.483	0.447	-0.384895
06/18/2011	15	0.001	0.006	0.008	0.001	0.001	0	0	0	0.009	0	0.008	306.154	0.537	-0.413754
06/18/2011	16	0.003	0.001	0.004	0.001	0.001	0	0	0	0.013	0	0.007	305.75	0.518	-0.325496
06/18/2011	17	0.009	0	0.002	0.001	0.001	0	0	0	0.012	0	0.007	305.792	0.473	-0.103643
06/18/2011	18	0.013	0	0.001	0.001	0.001	0	0.001	0	0.011	0	0.006	305.011	0.548	2.02322
06/18/2011	19	0.013	0	0.001	0.001	0.001	0	0.001	0	0.012	0	0.007	304.015	0.55	1.96199
06/18/2011	20	0.016	0.001	0.002	0.001	0.001	0	0.001	0	0.012	0	0.007	301.995	0.562	1.73276
06/18/2011	21	0.015	0.001	0.002	0.001	0.001	0	0.001	0	0.013	0	0.008	300.471	0.588	1.6775
06/18/2011	22	0.009	0.001	0.001	0.002	0.001	0	0.001	0	0.013	0	0.008	299.223	0.703	1.81768
06/18/2011	23	0.004	0.001	0.001	0.003	0.002	0	0.001	0	0.015	0	0.01	298.525	0.758	1.79174
06/18/2011	24	0.002	0.004	0.004	0.004	0.003	0	0.001	0.001	0.018	0	0.012	300.031	0.68	1.56007
06/19/2011	1	0.002	0.011	0.007	0.005	0.003	0	0.001	0.002	0.016	0.001	0.014	299.772	0.72	-0.267444
06/19/2011	2	0.002	0.013	0.008	0.006	0.004	0.001	0.001	0.002	0.014	0.001	0.014	299.354	0.766	-0.103261
06/19/2011	3	0.002	0.013	0.009	0.005	0.004	0.001	0.001	0.003	0.011	0.001	0.012	299.014	0.788	-0.0448609
06/19/2011	4	0.003	0.011	0.009	0.004	0.004	0.001	0.002	0.002	0.01	0.001	0.011	298.57	0.799	1.56355
06/19/2011	5	0.004	0.009	0.008	0.004	0.004	0.001	0.002	0.002	0.01	0.001	0.011	298.24	0.827	1.61905
06/19/2011	6	0.005	0.008	0.007	0.003	0.004	0.001	0.002	0.002	0.009	0.001	0.01	297.928	0.862	1.69762
06/19/2011	7	0.006	0.008	0.008	0.002	0.004	0.001	0.002	0.002	0.009	0.001	0.01	298.465	0.876	1.72129
06/19/2011	8	0.007	0.009	0.01	0.002	0.003	0	0.002	0.002	0.009	0.002	0.009	300.478	0.808	1.59054
06/19/2011	9	0.008	0.012	0.014	0.002	0.003	0	0.001	0.001	0.01	0.002	0.009	302.103	0.733	1.45088
06/19/2011	10	0.007	0.013	0.015	0.002	0.003	0	0.001	0.001	0.012	0.001	0.009	303.763	0.658	1.45743
06/19/2011	11	0.005	0.017	0.015	0.002	0.002	0	0.001	0.001	0.013	0.001	0.009	305.543	0.583	1.48245
06/19/2011	12	0.003	0.023	0.016	0.001	0.002	0	0.001	0.001	0.014	0.001	0.009	307.601	0.495	1.53148
06/19/2011	13	0.002	0.019	0.016	0.001	0.001	0	0.001	0	0.014	0.001	0.009	308.683	0.439	1.56923
06/19/2011	14	0.002	0.015	0.013	0.001	0.001	0	0	0	0.014	0	0.009	309.008	0.396	-0.909836
06/19/2011	15	0.003	0.011	0.01	0.001	0.001	0	0	0	0.013	0	0.009	308.813	0.402	-0.907055
06/19/2011	16	0.003	0.006	0.007	0.001	0.001	0	0	0	0.013	0	0.01	308.45	0.377	-0.89253
06/19/2011	17	0.003	0.004	0.005	0.001	0.001	0	0.001	0.001	0.016	0	0.009	308.859	0.361	1.8243
06/19/2011	18	0.006	0.003	0.004	0.001	0.001	0	0.001	0.001	0.015	0	0.009	308.128	0.392	1.82993
06/19/2011	19	0.009	0.003	0.003	0.001	0.001	0	0.001	0.001	0.014	0	0.009	306.374	0.405	1.78684
06/19/2011	20	0.011	0.004	0.002	0.002	0.001	0	0.001	0.001	0.014	0	0.01	303.691	0.453	1.71683
06/19/2011	21	0.011	0.004	0.001	0.003	0.001	0	0.001	0.001	0.014	0	0.01	303.153	0.451	1.78756
06/19/2011	22	0.006	0.003	0.002	0.003	0.002	0	0.001	0.001	0.015	0	0.01	302.358	0.515	1.67906
06/19/2011	23	0.003	0.003	0.004	0.003	0.002	0	0.001	0.001	0.016	0	0.011	300.442	0.642	1.55263
06/19/2011	24	0.003	0.004	0.005	0.002	0.002	0	0.001	0.001	0.016	0	0.012	299.875	0.686	-0.303243
06/20/2011	1	0.003	0.005	0.005	0.003	0.002	0	0.001	0.002	0.016	0	0.012	299.368	0.746	1.5779
06/20/2011	2	0.003	0.012	0.006	0.003	0.002	0	0.001	0.002	0.011	0.001	0.01	299.043	0.784	-0.164691
06/20/2011	3	0.002	0.016	0.008	0.002	0.002	0	0.001	0.002	0.007	0.001	0.008	298.827	0.8	-0.176878
06/20/2011	4	0.002	0.016	0.008	0.002	0.002	0	0.001	0.002	0.005	0.001	0.007	298.616	0.812	-0.175729
06/20/2011	5	0.003	0.015	0.007	0.002	0.002	0	0.001	0.002	0.004	0.001	0.006	298.37	0.828	1.5906
06/20/2011	6	0.004	0.013	0.006	0.003	0.003	0	0.001	0.002	0.002	0.001	0.006	298.091	0.847	1.63735
06/20/2011	7	0.005	0.012	0.006	0.003	0.003	0.001	0.001	0.002	0.001	0.001	0.005	298.641	0.848	2.49203
06/20/2011	8	0.006	0.015	0.008	0.003	0.003	0.001	0.001	0.002	0	0.001	0.005	300.58	0.766	2.45376
06/20/2011	9	0.006	0.028	0.015	0.002	0.003	0	0.001	0.002	0.002	0.001	0.005	302.248	0.7	1.48741
06/20/2011	10	0.004	0.032	0.02	0.001	0.002	0	0.001	0.001	0.004	0.001	0.004	303.916	0.632	1.45361
06/20/2011	11	0.002	0.022	0.017	0.001	0.001	0	0	0.001	0.006	0.001	0.004	304.367	0.598	1.36849
06/20/2011	12	0.002	0.015	0.014	0.001	0.001	0	0	0.001	0.006	0	0.005	305.976	0.531	1.45286
06/20/2011	13	0.002	0.01	0.012	0	0.001	0	0	0	0.006	0	0.006	307.633	0.478	-0.670355
06/20/2011	14	0.001	0.005	0.01	0	0.001	0	0	0	0.007	0	0.006	307.743	0.483	-0.670326
06/20/2011	15	0.002	0.002	0.007	0	0	0	0	0	0.007	0	0.005	305.986	0.51	-0.122234
06/20/2011	16	0.003	0.001	0.004	0	0	0	0	0	0.008	0	0.005	306.245	0.476	-0.664667
06/20/2011	17	0.006	0	0.003	0	0	0	0	0	0.007	0	0.004	305.26	0.49	-0.304121
06/20/2011	18	0.01	0	0.001	0	0	0	0.001	0	0.005	0	0.003	303.805	0.675	0.604567
06/20/2011	19	0.008	0	0.001	0.001	0	0	0.001	0	0.004	0	0.003	302.35	0.614	1.99754
06/20/2011	20	0.005	0	0.001	0.001	0	0	0	0	0.003	0	0.002	300.053	0.669	0.0429051
06/20/2011	21	0.003	0	0	0.001	0.001	0	0	0	0.003	0	0.002	299.011	0.701	0.165263
06/20/2011	22	0.002	0	0	0.001	0.001	0	0	0	0.003	0	0.002	298.357	0.749	0.151926
06/20/2011	23	0.001	0	0.001	0.001	0.001	0	0	0	0.004	0	0.003	297.759	0.797	-0.0882214
06/20/2011	24	0.002	0.001	0.001	0.002	0.001	0	0	0	0.006	0	0.004	297.29	0.832	0.241833
06/21/2011	1	0.003	0.002	0.001	0.003	0.002	0	0.001	0.001	0.006	0	0.005	296.957	0.842	1.88127
06/21/2011	2	0.004	0.004	0.001	0.002	0.002	0	0.001	0.001	0.004	0	0.005	296.93	0.833	1.90524
06/21/2011	3	0.004	0.004	0.001	0.002	0.002	0	0.001	0.001	0.003	0	0.004	296.956	0.838	1.93942
06/21/2011	4	0.004	0.004	0.001	0.002	0.002	0	0.001	0.001	0.002	0	0.004	297.032	0.843	1.95319
06/21/2011	5	0.005	0.004	0.001	0.002	0.002	0	0.001	0.001	0.001	0	0.004	297.075	0.861	1.98379
06/21/2011	6	0.006	0.004	0.001	0.002	0.002	0	0.001	0.001	0.001	0	0.004	297.126	0.885	2.03672
06/21/2011	7	0.006	0.005	0.001	0.001	0.002	0	0.001	0.001	0.001	0	0.004	297.958	0.895	2.13909
06/21/2011	8	0.006	0.008	0.001	0.002	0.002	0	0.001	0.001	0.001	0	0.004	299.652	0.849	2.06448
06/21/2011	9	0.004	0.015	0.003	0.001	0.002	0	0.001	0.001	0.002	0	0.004	301.169	0.786	1.89639
06/21/2011	10	0.002	0.018	0.005	0.001	0.001	0	0	0.001	0.004	0	0.003	302.444	0.73	1.67285
06/21/2011	11	0.001	0.01	0.004	0.001	0.001	0	0	0	0.003	0	0.003	302.2	0.718	-0.527044
06/21/2011	12	0.001	0.002	0.002	0	0	0	0	0	0.004	0	0.004	302.352	0.709	0.148301
06/21/2011	13	0.001	0.001	0.002	0	0	0	0	0	0.004	0	0.003	303.147	0.68	-0.01531
06/21/2011	14	0.001	0	0.001	0	0	0	0	0	0.006	0	0.003	303.033	0.679	-0.358932
06/21/2011	15	0.001	0	0.001	0	0	0	0	0	0.005	0	0.003	302.332	0.696	-0.322147
06/21/2011	16	0.001	0.001	0.001	0	0	0	0	0	0.003	0	0.003	301.64	0.711	0.0687631
06/21/2011	17	0.001	0.001	0.001	0	0	0	0	0	0.003	0	0.003	301.03	0.723	0.054551
06/21/2011	18	0.001	0.002	0.001	0	0	0	0	0	0.004	0	0.004	300.423	0.733	0.0897007
06/21/2011	19	0.001	0.003	0.001	0	0	0	0	0	0.006	0	0.005	299.672	0.744	-0.0105018
06/21/2011	20	0.002	0.004	0.001	0	0	0	0	0	0.011	0	0.006	298.564	0.782	0.0898374
06/21/2011	21	0.007	0.004	0.001	0	0	0	0.001	0	0.014	0	0.007	297.974	0.806	0.802482
06/21/2011	22	0.011	0.004	0.001	0	0	0	0.001	0	0.014	0	0.008	297.528	0.824	0.944172
06/21/2011	23	0.008	0.004	0.001	0	0.001	0	0.001	0	0.013	0	0.008	296.959	0.852	0.916536
06/21/2011	24	0.005	0.003	0.001	0	0.001	0	0.001	0	0.013	0	0.007	296.313	0.888	1.04654
06/22/2011	1	0.003	0.003	0.001	0	0.001	0	0.001	0	0.012	0	0.007	295.87	0.913	0.875803
06/22/2011	2	0.003	0.003	0.001	0	0.002	0	0.001	0	0.011	0	0.007	295.424	0.935	1.13092
06/22/2011	3	0.002	0.004	0.001	0	0.002	0	0.001	0	0.01	0	0.007	295.433	0.937	1.10425
06/22/2011	4	0.002	0.005	0.001	0	0.003	0	0.001	0	0.01	0	0.007	295.424	0.938	1.0993
06/22/2011	5	0.001	0.006	0.002	0	0.002	0	0.001	0	0.009	0	0.009	295.36	0.938	0.341228
06/22/2011	6	0.001	0.004	0.002	0	0.002	0	0.001	0.001	0.009	0	0.012	295.269	0.937	0.286013
06/22/2011	7	0	0.003	0.002	0	0.002	0	0.001	0.001	0.01	0	0.014	295.294	0.933	0.163236
06/22/2011	8	0	0.002	0.003	0.001	0.002	0	0.001	0.001	0.011	0	0.015	295.79	0.917	0.143307
06/22/2011	9	0	0.003	0.005	0.001	0.002	0	0.001	0.001	0.011	0	0.019	297.679	0.875	-0.10496
06/22/2011	10	0	0.007	0.008	0	0.001	0	0	0.001	0.008	0	0.017	299.958	0.805	-0.374487
06/22/2011	11	0	0.005	0.006	0	0.001	0	0	0	0.004	0	0.008	299.386	0.812	-0.346094
06/22/2011	12	0	0.002	0.004	0	0	0	0	0	0.004	0	0.006	300.792	0.801	-0.31137
06/22/2011	13	0	0	0.002	0	0	0	0	0	0.003	0	0.004	301.573	0.782	-0.266504
06/22/2011	14	0	0	0.002	0	0	0	0	0	0.003	0	0.004	301.705	0.782	-0.26586
06/22/2011	15	0	0	0.001	0	0	0	0	0	0.002	0	0.003	301.087	0.8	-0.310175
06/22/2011	16	0.001	0	0.001	0	0	0	0	0	0.002	0	0.002	300.235	0.82	0.189079
06/22/2011	17	0.001	0	0.001	0	0	0	0	0	0.002	0	0.002	299.227	0.85	0.258267
06/22/2011	18	0.001	0	0.001	0	0	0	0	0	0.003	0	0.002	298.659	0.882	0.135003
06/22/2011	19	0.004	0	0.001	0	0	0	0	0	0.004	0	0.002	298.07	0.899	0.808477
06/22/2011	20	0.005	0	0.001	0	0.001	0	0	0	0.004	0	0.002	297.343	0.916	1.24934
06/22/2011	21	0.006	0.001	0.001	0	0.001	0	0	0	0.004	0	0.003	297.005	0.925	1.23013
06/22/2011	22	0.006	0.001	0.001	0	0.001	0	0.001	0	0.003	0	0.003	296.866	0.935	1.36837
06/22/2011	23	0.006	0.001	0.001	0	0.001	0	0.001	0	0.003	0	0.003	296.949	0.926	1.29345
06/22/2011	24	0.006	0.001	0.001	0	0.002	0	0.001	0	0.004	0	0.003	296.972	0.936	1.62842
06/23/2011	1	0.004	0.001	0.001	0	0.001	0	0.001	0	0.004	0	0.004	296.847	0.964	1.09828
06/23/2011	2	0.004	0.001	0.001	0	0.001	0	0.001	0	0.005	0	0.004	296.915	0.967	1.38592
06/23/2011	3	0.005	0	0	0	0.001	0	0	0	0.005	0	0.003	297.002	0.962	1.5247
06/23/2011	4	0.006	0	0	0	0.001	0	0	0	0.005	0	0.003	297.05	0.965	1.72753
06/23/2011	5	0.005	0	0	0	0.001	0	0	0	0.005	0	0.004	297.085	0.968	1.46223
06/23/2011	6	0.006	0.001	0	0	0.002	0	0	0	0.005	0	0.004	297.178	0.968	1.70083
06/23/2011	7	0.006	0.002	0.001	0	0.003	0	0.001	0	0.006	0	0.005	298.169	0.928	1.3574
06/23/2011	8	0.002	0.007	0.003	0	0.002	0	0	0	0.007	0	0.005	299.124	0.882	0.463602
06/23/2011	9	0.001	0.005	0.004	0	0.001	0	0	0	0.004	0	0.003	299.477	0.859	0.0871557
06/23/2011	10	0.001	0.001	0.003	0	0	0	0	0	0.004	0	0.003	300.365	0.835	0.366557
06/23/2011	11	0.001	0	0.002	0	0	0	0	0	0.004	0	0.004	301.013	0.8	0.151408
06/23/2011	12	0.001	0	0.002	0	0	0	0	0	0.005	0	0.004	301.976	0.754	0.0614438
06/23/2011	13	0.001	0	0.002	0	0	0	0	0	0.005	0	0.004	302.37	0.718	0.00772764
06/23/2011	14	0.001	0	0.002	0	0	0	0	0	0.005	0	0.003	302.442	0.705	-0.303604
06/23/2011	15	0.003	0	0.002	0	0	0	0	0	0.005	0	0.003	302.394	0.693	-0.189395
06/23/2011	16	0.004	0	0.002	0	0	0	0	0	0.006	0	0.003	302.349	0.683	0.00786964
06/23/2011	17	0.005	0	0.002	0	0	0	0	0	0.007	0	0.004	301.748	0.701	0.0828053
06/23/2011	18	0.006	0.001	0.002	0.001	0	0	0	0	0.009	0	0.005	301.195	0.715	0.232868
06/23/2011	19	0.009	0.001	0.001	0.001	0	0	0.001	0	0.011	0	0.006	301.145	0.755	2.02408
06/23/2011	20	0.013	0.001	0.001	0.001	0.001	0	0.001	0.001	0.012	0	0.007	299.211	0.773	1.94821
06/23/2011	21	0.013	0.002	0.001	0.002	0.001	0	0.001	0.001	0.013	0	0.008	298.322	0.76	1.8378
06/23/2011	22	0.011	0.003	0.001	0.002	0.001	0	0.001	0.001	0.014	0	0.009	297.626	0.779	1.84268
06/23/2011	23	0.009	0.003	0.001	0.002	0.001	0	0.001	0.001	0.014	0	0.009	296.934	0.817	1.86389
06/23/2011	24	0.008	0.002	0.001	0.002	0.002	0	0.001	0.001	0.013	0	0.009	296.341	0.869	1.92532
06/24/2011	1	0.007	0.002	0.001	0.002	0.002	0	0.001	0.001	0.012	0	0.009	295.864	0.905	1.99781
06/24/2011	2	0.007	0.001	0.001	0.001	0.003	0	0.001	0.001	0.011	0	0.009	295.544	0.933	2.10424
06/24/2011	3	0.006	0.001	0.001	0.001	0.004	0	0.001	0.001	0.009	0	0.009	295.386	0.946	2.16146
06/24/2011	4	0.006	0.001	0.001	0.001	0.005	0	0.001	0.002	0.008	0	0.009	295.25	0.953	2.15379
06/24/2011	5	0.006	0.001	0.001	0.001	0.005	0	0.001	0.002	0.007	0	0.009	295.117	0.955	2.1774
06/24/2011	6	0.008	0.001	0.001	0.001	0.006	0	0.001	0.002	0.006	0	0.009	294.973	0.954	2.14236
06/24/2011	7	0.011	0.002	0.001	0.001	0.006	0	0.001	0.002	0.006	0	0.009	295.799	0.954	2.17173
06/24/2011	8	0.011	0.005	0.003	0.002	0.005	0	0.001	0.002	0.006	0	0.009	297.991	0.872	1.81795
06/24/2011	9	0.007	0.01	0.007	0.001	0.003	0	0.001	0.002	0.009	0.001	0.009	299.695	0.809	1.60534
06/24/2011	10	0.002	0.012	0.01	0	0.002	0	0.001	0.001	0.012	0	0.009	301.456	0.734	-0.827982
06/24/2011	11	0.002	0.011	0.01	0	0.001	0	0.001	0.001	0.011	0	0.009	303.256	0.664	-0.495627
06/24/2011	12	0.002	0.011	0.01	0	0.001	0	0.001	0.001	0.012	0	0.008	304.926	0.583	-1.04599
06/24/2011	13	0.003	0.01	0.009	0	0.001	0	0.001	0.001	0.012	0	0.008	306.402	0.541	-0.932537
06/24/2011	14	0.002	0.004	0.007	0	0	0	0.001	0.001	0.013	0	0.008	304.422	0.609	-0.795
06/24/2011	15	0.004	0.001	0.004	0.001	0	0	0.001	0.001	0.012	0	0.007	303.428	0.625	1.73378
06/24/2011	16	0.006	0	0.003	0.001	0	0	0.001	0.001	0.012	0	0.007	302.851	0.635	1.77257
06/24/2011	17	0.006	0	0.002	0.001	0	0	0.001	0.001	0.011	0	0.007	302.587	0.653	1.8496
06/24/2011	18	0.006	0	0.002	0.002	0	0	0.001	0.001	0.012	0	0.008	301.598	0.672	1.79042
06/24/2011	19	0.006	0.001	0.002	0.002	0.001	0	0.001	0.001	0.013	0	0.009	300.484	0.653	1.71263
06/24/2011	20	0.007	0.001	0.002	0.002	0.001	0	0.001	0.001	0.013	0	0.009	298.465	0.696	1.65465
06/24/2011	21	0.008	0.001	0.002	0.003	0.001	0	0.001	0.001	0.011	0	0.008	297.871	0.64	1.57321
06/24/2011	22	0.011	0.001	0.002	0.003	0.001	0	0.001	0.001	0.01	0	0.008	297.199	0.675	1.59338
06/24/2011	23	0.014	0.002	0.002	0.003	0.001	0	0.002	0.002	0.009	0	0.008	296.854	0.7	1.64503
06/24/2011	24	0.018	0.002	0.003	0.003	0.001	0	0.002	0.002	0.009	0	0.008	296.369	0.746	1.61259
06/25/2011	1	0.022	0.004	0.004	0.002	0.001	0.001	0.002	0.002	0.007	0	0.008	295.794	0.815	1.7609
06/25/2011	2	0.026	0.006	0.005	0.002	0.002	0.001	0.002	0.004	0.004	0.001	0.008	295.355	0.865	2.37397
06/25/2011	3	0.029	0.01	0.005	0.001	0.002	0.001	0.003	0.005	0.001	0.001	0.008	295.109	0.884	2.99851
06/25/2011	4	0.032	0.012	0.005	0.001	0.002	0.001	0.003	0.006	0.001	0.001	0.008	294.945	0.894	3.07277
06/25/2011	5	0.036	0.012	0.005	0.001	0.002	0.001	0.003	0.006	0.001	0.001	0.008	294.811	0.903	3.09814
06/25/2011	6	0.037	0.011	0.004	0.001	0.002	0.001	0.003	0.005	0.002	0.001	0.008	294.748	0.914	3.10929
06/25/2011	7	0.033	0.007	0.003	0.001	0.002	0.001	0.003	0.004	0.004	0.001	0.008	295.775	0.914	2.86049
06/25/2011	8	0.019	0.004	0.004	0.001	0.002	0.001	0.002	0.003	0.005	0.001	0.008	297.705	0.857	1.89537
06/25/2011	9	0.015	0.01	0.01	0	0.002	0	0.001	0.003	0.005	0.001	0.007	299.52	0.784	0.965051
06/25/2011	10	0.014	0.01	0.011	0	0.001	0	0.001	0.002	0.005	0.001	0.006	301.422	0.707	0.466729
06/25/2011	11	0.015	0.011	0.012	0	0.001	0	0.001	0.002	0.006	0	0.005	303.178	0.638	0.976226
06/25/2011	12	0.016	0.013	0.012	0	0.001	0	0.001	0.001	0.007	0	0.006	304.7	0.579	0.555031
06/25/2011	13	0.016	0.013	0.012	0	0.001	0	0.001	0.002	0.007	0	0.006	306.31	0.528	0.809903
06/25/2011	14	0.014	0.004	0.011	0	0.001	0	0.001	0.002	0.01	0.001	0.008	305.438	0.549	0.335582
06/25/2011	15	0.012	0	0.007	0	0	0	0.001	0.002	0.008	0	0.006	304.821	0.575	0.697191
06/25/2011	16	0.012	0	0.005	0	0	0	0.001	0.001	0.006	0	0.005	304.017	0.589	0.601434
06/25/2011	17	0.014	0	0.005	0	0	0	0.001	0.002	0.004	0	0.004	303.788	0.591	1.17152
06/25/2011	18	0.016	0.001	0.006	0	0.001	0	0.001	0.002	0.004	0.001	0.005	303.275	0.6	1.07348
06/25/2011	19	0.017	0.002	0.006	0.001	0.001	0	0.001	0.003	0.003	0.001	0.005	302.268	0.645	1.69737
06/25/2011	20	0.02	0.002	0.004	0.001	0.001	0	0.002	0.003	0.001	0.001	0.006	300.586	0.688	1.80089
06/25/2011	21	0.024	0.003	0.004	0.002	0.001	0.001	0.002	0.004	0	0.001	0.006	299.453	0.709	3.08208
06/25/2011	22	0.026	0.004	0.004	0.002	0.002	0.001	0.002	0.004	0	0.001	0.006	298.653	0.743	2.81528
06/25/2011	23	0.024	0.005	0.005	0.002	0.002	0.001	0.003	0.005	0	0.001	0.007	298.101	0.781	3.02638
06/25/2011	24	0.018	0.004	0.004	0.002	0.002	0.001	0.003	0.004	0.001	0.001	0.007	297.678	0.844	2.93427
06/26/2011	1	0.01	0.002	0.002	0.002	0.002	0.001	0.002	0.003	0.003	0	0.007	297.305	0.893	2.09019
06/26/2011	2	0.007	0.001	0.001	0.001	0.002	0	0.002	0.002	0.005	0	0.006	297.067	0.921	2.19061
06/26/2011	3	0.004	0	0.001	0.001	0.002	0	0.001	0.001	0.006	0	0.006	296.989	0.923	2.13448
06/26/2011	4	0.003	0	0	0.001	0.001	0	0.001	0.001	0.007	0	0.006	296.949	0.919	2.38639
06/26/2011	5	0.004	0	0	0.001	0.001	0	0.001	0.001	0.007	0	0.006	296.894	0.915	2.38429
06/26/2011	6	0.005	0.001	0.001	0.001	0.002	0	0.001	0.001	0.007	0	0.006	296.897	0.905	2.10389
06/26/2011	7	0.009	0.003	0.001	0.001	0.002	0	0.001	0.001	0.007	0	0.006	297.93	0.899	2.11933
06/26/2011	8	0.009	0.009	0.003	0.002	0.003	0	0.001	0.001	0.007	0	0.007	300.291	0.821	1.83423
06/26/2011	9	0.003	0.037	0.013	0.001	0.002	0	0.001	0.001	0.007	0	0.007	301.905	0.754	-0.309325
06/26/2011	10	0.002	0.032	0.017	0	0.001	0	0.001	0.001	0.007	0	0.007	303.643	0.672	-0.523663
06/26/2011	11	0.002	0.018	0.013	0	0.001	0	0	0.001	0.009	0	0.008	305.266	0.592	-0.650745
06/26/2011	12	0.002	0.004	0.008	0	0	0	0	0.001	0.008	0	0.007	304.71	0.598	-0.670334
06/26/2011	13	0.003	0	0.003	0	0	0	0	0.001	0.009	0	0.006	305.521	0.557	-0.606167
06/26/2011	14	0.005	0	0.002	0.001	0	0	0	0.001	0.008	0	0.005	305.729	0.556	1.87325
06/26/2011	15	0.005	0	0.002	0	0	0	0	0	0.007	0	0.004	305.123	0.58	-0.230971
06/26/2011	16	0.005	0	0.001	0	0	0	0	0	0.006	0	0.003	304.191	0.611	-0.0913852
06/26/2011	17	0.005	0	0.001	0	0	0	0	0	0.004	0	0.003	302.021	0.685	-0.062085
06/26/2011	18	0.005	0	0.001	0	0	0	0	0	0.004	0	0.002	300.496	0.781	0.363224
06/26/2011	19	0.005	0.002	0.001	0.001	0	0	0	0	0.004	0	0.003	299.315	0.845	0.44685
06/26/2011	20	0.005	0.004	0.001	0.001	0.001	0	0.001	0.001	0.006	0	0.004	297.994	0.86	2.06982
06/26/2011	21	0.004	0.004	0.001	0.001	0.001	0	0.001	0.001	0.008	0	0.006	297.286	0.877	2.0589
06/26/2011	22	0.005	0.003	0.001	0.001	0.001	0	0.001	0.001	0.009	0	0.006	297.064	0.874	2.03217
06/26/2011	23	0.006	0.002	0.001	0.001	0.001	0	0.001	0.001	0.007	0	0.006	297.051	0.873	2.03178
06/26/2011	24	0.007	0.001	0.001	0.002	0.002	0	0.001	0.002	0.005	0	0.006	297.081	0.852	1.95174
06/27/2011	1	0.009	0.001	0.002	0.003	0.002	0.001	0.002	0.003	0.002	0	0.006	297.307	0.827	2.91931
06/27/2011	2	0.009	0.001	0.002	0.003	0.002	0.001	0.002	0.004	0	0	0.006	297.462	0.81	2.75038
06/27/2011	3	0.007	0.001	0.001	0.005	0.003	0.001	0.003	0.005	0	0.001	0.006	297.458	0.825	3.05448
06/27/2011	4	0.005	0.001	0	0.006	0.003	0.001	0.003	0.005	0	0.002	0.006	297.447	0.828	2.95619
06/27/2011	5	0.005	0.002	0.002	0.005	0.003	0.001	0.002	0.004	0	0	0.006	297.357	0.844	2.59414
06/27/2011	6	0.005	0.004	0.001	0.004	0.003	0.001	0.002	0.003	0	0	0.006	297.234	0.853	2.68717
06/27/2011	7	0.007	0.005	0.002	0.003	0.003	0.001	0.002	0.002	0.001	0	0.006	297.945	0.867	2.05633
06/27/2011	8	0.006	0.009	0.004	0.003	0.003	0.001	0.001	0.002	0.003	0	0.006	299.979	0.803	1.92057
06/27/2011	9	0.004	0.023	0.01	0.002	0.002	0	0.001	0.001	0.005	0.001	0.006	301.608	0.747	1.55485
06/27/2011	10	0.003	0.029	0.017	0.001	0.002	0	0.001	0.001	0.007	0.001	0.006	303.185	0.686	1.4625
06/27/2011	11	0.002	0.028	0.021	0	0.001	0	0.001	0.001	0.01	0.001	0.007	304.738	0.628	-1.48329
06/27/2011	12	0.001	0.02	0.018	0	0.001	0	0	0.001	0.01	0	0.007	306.187	0.576	-0.705892
06/27/2011	13	0.002	0.01	0.012	0	0.001	0	0	0.001	0.008	0	0.006	306.447	0.559	-1.3897
06/27/2011	14	0.002	0.002	0.005	0	0	0	0	0	0.008	0	0.005	305.928	0.569	-0.461232
06/27/2011	15	0.005	0	0.002	0	0	0	0	0	0.006	0	0.004	306.608	0.544	-0.420375
06/27/2011	16	0.008	0	0.002	0	0	0	0	0	0.006	0	0.004	307.03	0.504	-0.267692
06/27/2011	17	0.008	0	0.001	0	0	0	0	0	0.006	0	0.003	305.105	0.542	-0.04343
06/27/2011	18	0.009	0	0.001	0	0	0	0	0	0.005	0	0.003	304.037	0.595	0.088017
06/27/2011	19	0.01	0	0.001	0.001	0	0	0	0	0.004	0	0.003	302.75	0.606	0.144296
06/27/2011	20	0.01	0	0.001	0.001	0	0	0	0	0.004	0	0.002	300.909	0.702	0.463953
06/27/2011	21	0.009	0	0	0.001	0.001	0	0	0	0.003	0	0.002	300.534	0.659	0.490141
06/27/2011	22	0.007	0	0	0.002	0.001	0	0	0	0.003	0	0.002	299.889	0.723	0.517068
06/27/2011	23	0.004	0	0	0.001	0.001	0	0	0	0.002	0	0.002	298.536	0.862	0.618946
06/27/2011	24	0.002	0	0	0.001	0	0	0	0	0.002	0	0.002	298.268	0.885	0.0956994
06/28/2011	1	0.002	0	0	0	0	0	0	0	0.003	0	0.002	298.053	0.909	0.387987
06/28/2011	2	0.002	0.001	0.001	0.001	0.001	0	0	0	0.005	0	0.003	297.968	0.911	0.727058
06/28/2011	3	0.002	0.005	0.003	0.001	0.001	0	0	0	0.007	0	0.005	298.385	0.843	0.132408
06/28/2011	4	0.002	0.008	0.003	0.001	0.002	0	0	0.001	0.008	0	0.006	297.939	0.867	1.80925
06/28/2011	5	0.003	0.007	0.003	0.001	0.002	0	0.001	0.001	0.007	0	0.006	297.693	0.892	1.89349
06/28/2011	6	0.004	0.006	0.002	0.001	0.003	0	0.001	0.001	0.006	0	0.006	297.674	0.9	1.98963
06/28/2011	7	0.005	0.006	0.002	0.001	0.003	0	0.001	0.001	0.005	0	0.006	298.534	0.901	2.00389
06/28/2011	8	0.005	0.014	0.006	0.001	0.003	0	0.001	0.001	0.004	0	0.005	299.666	0.865	1.7895
06/28/2011	9	0.003	0.025	0.013	0.001	0.002	0	0.001	0.001	0.006	0	0.005	300.457	0.825	1.59414
06/28/2011	10	0.001	0.018	0.018	0	0.001	0	0	0	0.007	0	0.006	300.926	0.794	-0.269845
06/28/2011	11	0.001	0.011	0.016	0	0.001	0	0	0	0.009	0	0.007	300.651	0.77	-0.306184
06/28/2011	12	0.002	0.006	0.013	0	0	0	0	0	0.009	0	0.007	300.207	0.76	0.0422347
06/28/2011	13	0.001	0.003	0.01	0	0	0	0	0	0.009	0	0.007	300.369	0.744	0.00236742
06/28/2011	14	0.001	0.002	0.008	0	0	0	0	0	0.01	0	0.01	300.462	0.741	0.0960547
06/28/2011	15	0	0.004	0.01	0	0	0	0	0	0.011	0	0.012	300.36	0.743	-0.113315
06/28/2011	16	0.001	0.007	0.012	0	0	0	0	0	0.012	0	0.012	300.13	0.76	0.0717649
06/28/2011	17	0.001	0.008	0.011	0	0	0	0	0.001	0.013	0	0.011	299.536	0.783	-0.19139
06/28/2011	18	0.001	0.006	0.01	0	0	0	0	0.001	0.014	0	0.011	298.793	0.802	-0.18771
06/28/2011	19	0.001	0.004	0.008	0	0	0	0	0.001	0.015	0	0.011	298.013	0.826	-0.122798
06/28/2011	20	0.002	0.003	0.007	0	0	0	0.001	0.001	0.016	0	0.012	297.737	0.837	-0.0570066
06/28/2011	21	0.002	0.003	0.006	0	0	0	0.001	0.001	0.017	0	0.012	297.462	0.853	-0.0200146
06/28/2011	22	0.002	0.003	0.006	0	0	0	0.001	0.001	0.018	0	0.012	296.806	0.881	0.0858696
06/28/2011	23	0.004	0.003	0.005	0	0	0	0.001	0.001	0.02	0	0.012	296.332	0.898	0.449379
06/28/2011	24	0.008	0.003	0.005	0	0	0	0.001	0.001	0.019	0	0.011	295.947	0.912	1.07553
06/29/2011	1	0.011	0.003	0.005	0	0	0	0.001	0.001	0.018	0	0.011	295.613	0.926	1.36811
06/29/2011	2	0.013	0.002	0.005	0	0	0	0.001	0.001	0.016	0	0.01	295.387	0.934	1.50711
06/29/2011	3	0.015	0.002	0.005	0	0	0	0.001	0.001	0.015	0	0.009	295.276	0.933	1.66583
06/29/2011	4	0.017	0.002	0.005	0	0	0	0.001	0.001	0.014	0	0.009	295.205	0.931	1.70865
06/29/2011	5	0.017	0.003	0.005	0	0	0	0.001	0.001	0.013	0	0.008	295.144	0.927	1.76023
06/29/2011	6	0.016	0.006	0.005	0	0.001	0	0.001	0.001	0.012	0	0.008	295.054	0.924	1.68954
06/29/2011	7	0.012	0.014	0.006	0	0.001	0	0.002	0.001	0.011	0	0.008	295.557	0.914	1.42261
06/29/2011	8	0.01	0.043	0.016	0	0.001	0	0.002	0.001	0.015	0.001	0.01	297.105	0.861	-0.0629135
06/29/2011	9	0.012	0.08	0.026	0	0.001	0	0.002	0.001	0.027	0.001	0.016	298.846	0.796	-0.456359
06/29/2011	10	0.01	0.069	0.024	0	0.001	0	0.001	0.001	0.03	0.001	0.017	300.561	0.734	-0.619521
06/29/2011	11	0.005	0.054	0.025	0	0.001	0	0.001	0.001	0.031	0.001	0.018	302.277	0.673	-0.980557
06/29/2011	12	0.003	0.034	0.023	0	0.001	0	0.001	0.001	0.028	0	0.018	303.775	0.616	-0.433399
06/29/2011	13	0.002	0.023	0.021	0	0.001	0	0.001	0.001	0.026	0	0.02	304.974	0.573	-0.476838
06/29/2011	14	0.001	0.017	0.02	0	0.001	0	0.001	0.001	0.027	0	0.023	305.631	0.548	-0.208554
06/29/2011	15	0.001	0.017	0.02	0	0.001	0	0.001	0.001	0.029	0	0.025	305.609	0.544	-0.156342
06/29/2011	16	0.001	0.019	0.019	0	0.001	0	0.001	0.001	0.032	0	0.025	305.252	0.554	-0.331857
06/29/2011	17	0.002	0.023	0.017	0	0.001	0	0.001	0.001	0.035	0	0.025	304.658	0.564	-0.49651
06/29/2011	18	0.004	0.024	0.014	0	0.001	0	0.001	0.002	0.037	0	0.025	304.015	0.579	-0.45201
06/29/2011	19	0.005	0.016	0.009	0.001	0.001	0	0.001	0.002	0.038	0	0.024	303.045	0.632	-0.324461
06/29/2011	20	0.006	0.012	0.005	0.002	0.001	0	0.001	0.002	0.038	0	0.023	303.691	0.453	1.51306
06/29/2011	21	0.005	0.01	0.003	0.003	0.001	0	0.001	0.002	0.036	0	0.021	303.153	0.451	1.57949
06/29/2011	22	0.004	0.006	0.002	0.004	0.001	0	0.001	0.001	0.031	0	0.02	302.358	0.515	-0.507962
06/29/2011	23	0.002	0.005	0.002	0.003	0.001	0	0.001	0.001	0.025	0	0.018	300.442	0.642	-0.42218
06/29/2011	24	0.001	0.004	0.002	0.003	0.002	0	0.001	0.001	0.022	0	0.018	299.875	0.686	-0.322125
2011-02-07	1	0.028	0.022	0.005	0.003	0.002	0.002	0.004	0.009	0.031	0.001	0.029	297.747	0.761	1.6102
2011-02-07	2	0.025	0.018	0.003	0.003	0.002	0.002	0.004	0.009	0.026	0.001	0.027	297.274	0.802	1.72765
2011-02-07	3	0.024	0.015	0.002	0.003	0.002	0.002	0.005	0.01	0.021	0.001	0.025	296.882	0.825	1.82991
2011-02-07	4	0.023	0.013	0.002	0.003	0.002	0.002	0.005	0.01	0.016	0.001	0.023	296.72	0.827	1.84991
2011-02-07	5	0.021	0.011	0.002	0.003	0.002	0.002	0.005	0.01	0.012	0.001	0.022	296.396	0.846	1.87234
2011-02-07	6	0.021	0.01	0.002	0.003	0.003	0.002	0.005	0.011	0.01	0.001	0.021	296.254	0.855	2.03002
2011-02-07	7	0.024	0.009	0.003	0.002	0.003	0.002	0.005	0.011	0.007	0.001	0.02	297.101	0.862	2.14603
2011-02-07	8	0.023	0.007	0.004	0.002	0.003	0.002	0.006	0.011	0.004	0.001	0.019	299.677	0.771	2.19965
2011-02-07	9	0.028	0.016	0.009	0.001	0.003	0.001	0.004	0.007	0.013	0.001	0.018	301.767	0.689	1.68856
2011-02-07	10	0.024	0.026	0.011	0	0.003	0.001	0.002	0.005	0.02	0.001	0.018	303.982	0.595	0.934347
2011-02-07	11	0.013	0.048	0.012	0	0.002	0.001	0.002	0.003	0.026	0	0.018	305.986	0.512	0.238773
2011-02-07	12	0.004	0.067	0.014	0	0.001	0	0.001	0.002	0.029	0	0.02	307.737	0.448	-0.705874
2011-02-07	13	0.002	0.077	0.016	0	0.001	0	0.001	0.002	0.03	0	0.023	309.406	0.395	-0.659889
2011-02-07	14	0.001	0.048	0.015	0	0.001	0	0.001	0.002	0.028	0	0.03	307.029	0.461	0.213685
2011-02-07	15	0	0.027	0.012	0	0.001	0	0.001	0.002	0.031	0	0.034	306.756	0.46	0.318998
2011-02-07	16	0.001	0.03	0.013	0	0.001	0	0.001	0.002	0.037	0	0.034	307.891	0.41	0.00929848
2011-02-07	17	0.001	0.027	0.013	0	0.001	0	0.001	0.002	0.039	0	0.034	306.801	0.429	-0.0899661
2011-02-07	18	0.001	0.013	0.009	0	0.001	0	0.001	0.002	0.034	0	0.031	305.076	0.461	-0.0270604
2011-02-07	19	0.001	0.008	0.007	0.001	0.001	0	0.001	0.002	0.033	0	0.029	304.367	0.491	-0.137301
2011-02-07	20	0.001	0.009	0.007	0.001	0.001	0	0.001	0.002	0.038	0	0.03	302.677	0.509	-0.433094
2011-02-07	21	0.003	0.01	0.008	0.001	0.001	0.001	0.002	0.003	0.043	0	0.031	300.979	0.545	-0.41757
2011-02-07	22	0.005	0.012	0.008	0.001	0.001	0.001	0.002	0.003	0.047	0	0.031	299.701	0.595	-0.220632
2011-02-07	23	0.01	0.013	0.008	0.001	0.001	0.001	0.002	0.004	0.048	0.001	0.03	298.791	0.647	1.34083
2011-02-07	24	0.022	0.013	0.008	0.001	0.001	0.001	0.002	0.004	0.043	0.001	0.028	298.068	0.703	1.39847
2011-03-07	1	0.031	0.013	0.008	0.001	0.001	0.001	0.003	0.005	0.038	0.001	0.026	297.432	0.765	1.4844
2011-03-07	2	0.038	0.012	0.007	0.001	0.001	0.001	0.003	0.005	0.035	0.001	0.025	297.014	0.804	1.58203
2011-03-07	3	0.042	0.012	0.007	0.001	0.001	0.001	0.003	0.005	0.032	0.001	0.024	296.778	0.821	1.67833
2011-03-07	4	0.044	0.012	0.007	0.001	0.001	0.001	0.003	0.005	0.03	0.001	0.023	296.602	0.83	1.74387
2011-03-07	5	0.046	0.012	0.006	0.001	0.001	0.001	0.003	0.006	0.028	0.002	0.022	296.462	0.837	1.84059
2011-03-07	6	0.048	0.012	0.006	0.001	0.002	0.001	0.004	0.006	0.026	0.002	0.022	296.402	0.843	1.90718
2011-03-07	7	0.049	0.012	0.006	0.001	0.002	0.001	0.004	0.007	0.022	0.002	0.021	297.318	0.849	1.95678
2011-03-07	8	0.041	0.011	0.007	0.001	0.002	0.002	0.004	0.008	0.018	0.001	0.021	299.582	0.787	1.77067
2011-03-07	9	0.067	0.042	0.015	0	0.003	0.002	0.004	0.009	0.016	0.001	0.021	301.2	0.731	1.99016
2011-03-07	10	0.07	0.059	0.018	0	0.002	0.001	0.003	0.007	0.021	0.001	0.021	303.172	0.662	1.71239
2011-03-07	11	0.046	0.067	0.022	0	0.002	0.001	0.002	0.005	0.028	0.001	0.021	305.552	0.563	1.24546
2011-03-07	12	0.012	0.055	0.024	0	0.001	0	0.001	0.003	0.037	0	0.023	307.02	0.508	-0.78621
2011-03-07	13	0.003	0.029	0.019	0	0.001	0	0.001	0.002	0.035	0	0.025	307.872	0.49	-0.615602
2011-03-07	14	0.002	0.006	0.011	0	0.001	0	0.001	0.001	0.03	0	0.023	306.697	0.524	-0.473013
2011-03-07	15	0.003	0	0.006	0	0	0	0	0.001	0.025	0	0.017	306.076	0.54	-0.616254
2011-03-07	16	0.004	0	0.004	0	0	0	0	0	0.023	0	0.012	306.344	0.531	-0.279621
2011-03-07	17	0.006	0	0.003	0	0	0	0	0	0.018	0	0.009	306.333	0.521	-0.162239
2011-03-07	18	0.007	0	0.002	0	0	0	0	0	0.013	0	0.007	305.851	0.516	-0.170553
2011-03-07	19	0.007	0	0.002	0	0	0	0	0	0.01	0	0.005	304.793	0.526	-0.0892668
2011-03-07	20	0.007	0	0.002	0	0	0	0	0	0.007	0	0.004	303.106	0.585	-0.0108922
2011-03-07	21	0.005	0	0.002	0	0	0	0	0	0.006	0	0.003	301.88	0.63	0.0133344
2011-03-07	22	0.005	0	0.001	0	0	0	0	0	0.005	0	0.003	300.949	0.67	0.0307877
2011-03-07	23	0.004	0	0.001	0	0	0	0	0	0.004	0	0.002	300.192	0.71	0.1182
2011-03-07	24	0.003	0	0.001	0	0	0	0	0	0.003	0	0.002	299.559	0.748	-0.020406
2011-04-07	1	0.004	0	0.001	0	0	0	0	0	0.003	0	0.002	299.07	0.783	0.207899
2011-04-07	2	0.004	0	0.001	0	0	0	0	0	0.002	0	0.001	298.558	0.822	0.451137
2011-04-07	3	0.004	0	0.001	0	0	0	0	0	0.002	0	0.001	298.199	0.848	0.556506
2011-04-07	4	0.004	0	0	0	0	0	0	0	0.002	0	0.001	298.222	0.817	0.28303
2011-04-07	5	0.003	0	0	0	0	0	0	0	0.002	0	0.001	297.855	0.847	0.308348
2011-04-07	6	0.003	0	0	0	0	0	0	0	0.003	0	0.002	297.572	0.881	0.366567
2011-04-07	7	0.003	0	0	0	0	0	0	0	0.004	0	0.002	298.208	0.875	0.415069
2011-04-07	8	0.003	0	0.001	0	0	0	0	0	0.005	0	0.003	299.94	0.82	0.198211
2011-04-07	9	0.001	0	0.003	0	0	0	0	0	0.009	0	0.005	301.235	0.762	-0.0737488
2011-04-07	10	0.002	0	0.004	0	0	0	0	0	0.011	0	0.006	302.854	0.688	-0.207736
2011-04-07	11	0.004	0	0.005	0	0	0	0	0	0.011	0	0.006	304.683	0.617	-0.193008
2011-04-07	12	0.002	0	0.006	0	0	0	0	0	0.01	0	0.005	305.856	0.572	-0.416591
2011-04-07	13	0.004	0	0.003	0	0	0	0	0	0.007	0	0.004	305.208	0.58	-0.320432
2011-04-07	14	0.008	0	0.001	0	0	0	0	0	0.005	0	0.003	305.522	0.57	-0.0623633
2011-04-07	15	0.011	0	0.001	0	0	0	0	0	0.004	0	0.002	305.881	0.552	0.0851674
2011-04-07	16	0.008	0	0.001	0	0	0	0	0	0.004	0	0.002	304.313	0.617	0.107459
2011-04-07	17	0.005	0	0.001	0	0	0	0	0	0.003	0	0.002	303.184	0.659	-0.0759703
2011-04-07	18	0.004	0	0.001	0	0	0	0	0	0.003	0	0.002	302.268	0.704	-0.0768245
2011-04-07	19	0.003	0	0	0	0	0	0	0	0	0	0	301.078	0.768	0
2011-04-07	20	0.005	0	0	0	0	0	0	0	0	0	0	299.754	0.823	0
2011-04-07	21	0.007	0	0	0	0	0	0	0	0	0	0	298.859	0.858	0
2011-04-07	22	0.007	0	0	0	0	0	0	0	0	0	0	298.228	0.879	0
2011-04-07	23	0.007	0	0	0	0	0	0	0	0	0	0	297.758	0.895	0
2011-04-07	24	0.009	0	0	0	0	0	0	0	0	0	0	297.44	0.907	0
2011-05-07	1	0.01	0	0	0	0	0	0	0	0	0	0	297.213	0.914	0
2011-05-07	2	0.011	0	0	0	0	0	0	0	0	0	0	297.028	0.918	0
2011-05-07	3	0.012	0	0.001	0	0	0	0	0	0	0	0	296.871	0.921	1.27482
2011-05-07	4	0.011	0	0.001	0	0	0	0	0	0	0	0	296.712	0.926	1.24581
2011-05-07	5	0.01	0	0.001	0	0	0	0	0	0	0	0	296.554	0.925	1.21333
2011-05-07	6	0.009	0	0.001	0	0	0	0.001	0	0.001	0	0.001	296.377	0.931	1.76538
2011-05-07	7	0.008	0.001	0.001	0	0.001	0	0.001	0	0.002	0	0.002	296.972	0.92	1.5862
2011-05-07	8	0.014	0.003	0.002	0.001	0.002	0	0.001	0.001	0.005	0	0.005	298.303	0.888	1.99212
2011-05-07	9	0.016	0.009	0.004	0	0.002	0	0.001	0.002	0.01	0	0.008	299.734	0.836	1.3133
2011-05-07	10	0.006	0.014	0.008	0	0.001	0	0.001	0.001	0.017	0	0.01	300.878	0.787	0.18281
2011-05-07	11	0.002	0.004	0.007	0	0	0	0	0.001	0.015	0	0.009	301.968	0.745	-0.330762
2011-05-07	12	0.001	0.001	0.006	0	0	0	0	0	0.012	0	0.007	303.2	0.691	0.311287
2011-05-07	13	0.002	0.001	0.005	0	0	0	0	0	0.01	0	0.006	304.672	0.617	1.30184
2011-05-07	14	0.002	0	0.004	0	0	0	0	0	0.009	0	0.005	304.961	0.599	-0.447536
2011-05-07	15	0.001	0	0.003	0	0	0	0	0	0.008	0	0.004	304.35	0.619	-0.443903
2011-05-07	16	0.002	0.001	0.003	0	0	0	0	0	0.008	0	0.005	303.542	0.65	-0.314657
2011-05-07	17	0.002	0.001	0.002	0	0	0	0	0	0.009	0	0.006	302.323	0.697	0.252902
2011-05-07	18	0.002	0.001	0.002	0	0	0	0	0	0.01	0	0.006	301.165	0.747	1.45224
2011-05-07	19	0.002	0.001	0.002	0	0	0	0	0	0.01	0	0.006	300.147	0.795	1.45062
2011-05-07	20	0.002	0.001	0.001	0	0	0	0	0	0.01	0	0.006	299.046	0.828	1.5943
2011-05-07	21	0.003	0.001	0.001	0	0	0	0	0	0.012	0	0.006	298.273	0.855	0.575441
2011-05-07	22	0.007	0.001	0.001	0	0	0	0	0	0.012	0	0.006	297.691	0.875	0.975607
2011-05-07	23	0.009	0.001	0.001	0	0	0	0.001	0	0.011	0	0.006	297.248	0.888	1.19565
2011-05-07	24	0.011	0.001	0.001	0	0	0	0.001	0	0.01	0	0.006	296.907	0.895	1.30418
2011-06-07	1	0.014	0.001	0.002	0	0	0	0.001	0	0.01	0	0.006	296.62	0.901	1.44632
2011-06-07	2	0.016	0.001	0.002	0	0	0	0.001	0	0.009	0	0.005	296.384	0.907	1.6363
2011-06-07	3	0.017	0.001	0.002	0	0	0	0.001	0	0.009	0	0.005	296.234	0.91	1.67216
2011-06-07	4	0.017	0.001	0.002	0	0	0	0.001	0	0.009	0	0.005	296.127	0.911	1.67609
2011-06-07	5	0.018	0.001	0.002	0	0	0	0.001	0	0.009	0	0.005	296.04	0.913	1.70769
2011-06-07	6	0.019	0.002	0.002	0	0	0	0.001	0	0.009	0	0.005	295.978	0.918	1.79301
2011-06-07	7	0.019	0.002	0.002	0	0.001	0	0.001	0	0.009	0	0.006	296.672	0.918	1.74937
2011-06-07	8	0.01	0.006	0.003	0	0.001	0	0.001	0	0.01	0	0.006	297.802	0.855	1.11507
2011-06-07	9	0.002	0.023	0.007	0	0.001	0	0	0	0.014	0	0.008	299.273	0.796	0.198411
2011-06-07	10	0.002	0.027	0.009	0	0.001	0	0	0.001	0.013	0	0.009	300.738	0.741	-0.342729
2011-06-07	11	0.003	0.033	0.01	0	0.001	0	0	0.001	0.014	0	0.009	302.265	0.68	-0.836763
2011-06-07	12	0.002	0.037	0.01	0	0.001	0	0	0	0.014	0	0.009	303.759	0.616	-0.550389
2011-06-07	13	0.001	0.04	0.01	0	0	0	0	0	0.015	0	0.008	305.082	0.562	1.15006
2011-06-07	14	0.001	0.038	0.009	0	0	0	0	0	0.015	0	0.008	305.732	0.539	1.18742
2011-06-07	15	0.002	0.037	0.01	0	0	0	0	0	0.015	0	0.008	305.672	0.538	-0.463709
2011-06-07	16	0.003	0.035	0.01	0	0	0	0	0	0.015	0	0.008	305.372	0.543	-0.37991
2011-06-07	17	0.004	0.032	0.01	0	0	0	0	0	0.016	0	0.009	304.791	0.554	-0.332585
2011-06-07	18	0.006	0.028	0.009	0	0	0	0	0.001	0.015	0	0.009	304.157	0.562	-0.652742
2011-06-07	19	0.008	0.023	0.008	0	0	0	0	0.001	0.015	0	0.009	303.327	0.57	-0.273617
2011-06-07	20	0.012	0.018	0.007	0	0	0	0.001	0.001	0.015	0	0.009	301.459	0.642	0.511533
2011-06-07	21	0.015	0.015	0.005	0	0.001	0	0.001	0.002	0.013	0	0.009	300.375	0.667	0.873416
2011-06-07	22	0.018	0.013	0.006	0.001	0.001	0	0.002	0.002	0.012	0	0.01	299.581	0.698	1.56336
2011-06-07	23	0.02	0.014	0.007	0.001	0.001	0.001	0.002	0.003	0.01	0	0.011	298.937	0.734	1.6197
2011-06-07	24	0.02	0.015	0.008	0.001	0.002	0.001	0.003	0.004	0.009	0	0.012	298.34	0.779	1.67949
2011-07-07	1	0.02	0.017	0.01	0.001	0.002	0.001	0.004	0.005	0.008	0.001	0.013	297.818	0.825	1.69937
2011-07-07	2	0.018	0.02	0.011	0.001	0.002	0.001	0.004	0.007	0.007	0.001	0.014	297.466	0.855	1.8661
2011-07-07	3	0.016	0.021	0.012	0.001	0.003	0.001	0.004	0.008	0.006	0.001	0.015	297.289	0.865	1.92292
2011-07-07	4	0.014	0.021	0.011	0.001	0.003	0.001	0.004	0.009	0.005	0.001	0.015	297.202	0.87	2.07471
2011-07-07	5	0.013	0.022	0.01	0.001	0.003	0.001	0.004	0.009	0.004	0.001	0.015	297.089	0.88	2.05329
2011-07-07	6	0.013	0.023	0.008	0.001	0.003	0.001	0.004	0.009	0.002	0.001	0.015	297.051	0.89	2.02569
2011-07-07	7	0.014	0.022	0.009	0.001	0.003	0.002	0.004	0.01	0.001	0.001	0.014	297.993	0.89	2.74976
2011-07-07	8	0.016	0.025	0.016	0.001	0.003	0.002	0.004	0.01	0.001	0.001	0.013	300.734	0.807	2.72128
2011-07-07	9	0.018	0.109	0.032	0	0.003	0.001	0.002	0.005	0.006	0.001	0.011	302.254	0.734	-0.728533
2011-07-07	10	0.003	0.157	0.036	0	0.001	0	0.001	0.002	0.016	0	0.013	303.76	0.652	-0.471215
2011-07-07	11	0.001	0.095	0.025	0	0.001	0	0.001	0.001	0.014	0	0.013	304.951	0.598	-0.324663
2011-07-07	12	0.001	0.061	0.019	0	0	0	0	0.001	0.014	0	0.014	305.913	0.55	-0.052338
2011-07-07	13	0.001	0.044	0.017	0	0	0	0	0.001	0.014	0	0.014	306.85	0.506	-0.0460905
2011-07-07	14	0.001	0.03	0.014	0	0	0	0	0.001	0.014	0	0.013	307.7	0.482	-0.203582
2011-07-07	15	0.001	0.017	0.011	0	0	0	0	0.001	0.013	0	0.011	307.28	0.483	-0.453066
2011-07-07	16	0.001	0.008	0.008	0	0	0	0	0	0.011	0	0.009	306.831	0.494	0.293397
2011-07-07	17	0.001	0.005	0.007	0	0	0	0	0	0.01	0	0.007	306.042	0.512	-0.253989
2011-07-07	18	0.002	0.004	0.005	0	0	0	0	0	0.01	0	0.006	305.12	0.532	1.29646
2011-07-07	19	0.003	0.003	0.004	0	0	0	0	0.001	0.011	0	0.006	303.941	0.56	-0.351067
2011-07-07	20	0.006	0.003	0.004	0	0	0	0.001	0.001	0.01	0	0.006	302.165	0.619	0.257335
2011-07-07	21	0.009	0.003	0.004	0	0	0	0.001	0.001	0.009	0	0.007	300.873	0.636	0.272853
2011-07-07	22	0.011	0.006	0.005	0	0	0	0.001	0.001	0.009	0	0.007	299.917	0.655	0.486601
2011-07-07	23	0.013	0.009	0.006	0	0.001	0	0.001	0.001	0.009	0	0.007	299.128	0.69	0.778889
2011-07-07	24	0.015	0.011	0.007	0	0.001	0	0.001	0.001	0.009	0	0.007	298.392	0.742	0.978449
2011-08-07	1	0.016	0.012	0.007	0	0.001	0	0.002	0.002	0.008	0	0.007	297.716	0.802	1.34775
2011-08-07	2	0.017	0.012	0.008	0	0.001	0	0.002	0.002	0.008	0	0.007	297.252	0.843	1.45039
2011-08-07	3	0.018	0.011	0.008	0	0.001	0.001	0.002	0.002	0.007	0	0.007	297.003	0.86	1.68508
2011-08-07	4	0.017	0.009	0.007	0	0.001	0.001	0.002	0.002	0.007	0	0.007	296.829	0.869	1.7052
2011-08-07	5	0.016	0.007	0.006	0	0.001	0.001	0.002	0.002	0.006	0	0.007	296.693	0.875	1.694
2011-08-07	6	0.015	0.005	0.004	0	0.001	0.001	0.002	0.002	0.006	0	0.007	296.662	0.881	1.72637
2011-08-07	7	0.016	0.003	0.003	0	0.001	0.001	0.002	0.003	0.006	0	0.007	297.572	0.888	1.94137
2011-08-07	8	0.013	0.003	0.002	0	0.001	0.001	0.002	0.003	0.006	0	0.007	300.114	0.804	1.62263
2011-08-07	9	0.006	0.007	0.008	0	0.001	0	0.001	0.001	0.01	0	0.007	301.954	0.734	-0.154576
2011-08-07	10	0.003	0.027	0.009	0	0.001	0	0.001	0.001	0.012	0	0.008	303.914	0.639	-0.784328
2011-08-07	11	0.003	0.059	0.009	0	0.001	0	0	0	0.015	0	0.009	305.333	0.575	-0.3585
2011-08-07	12	0.007	0.052	0.008	0	0.001	0	0	0	0.015	0	0.008	306.578	0.527	-0.0752214
2011-08-07	13	0.007	0.027	0.007	0	0.001	0	0	0.001	0.017	0	0.01	305.987	0.531	-0.247736
2011-08-07	14	0.005	0.009	0.006	0	0.001	0	0.001	0.001	0.021	0	0.012	305.309	0.568	-0.193601
2011-08-07	15	0.01	0.006	0.006	0.001	0.001	0	0.001	0.001	0.02	0	0.012	305.646	0.544	1.66254
2011-08-07	16	0.011	0.004	0.005	0.001	0	0	0.001	0.001	0.02	0	0.012	305.46	0.549	1.70055
2011-08-07	17	0.01	0.001	0.005	0	0	0	0.001	0.001	0.019	0	0.011	305.285	0.54	0.139323
2011-08-07	18	0.011	0.001	0.004	0	0	0	0.001	0.001	0.015	0	0.009	304.954	0.533	0.254174
2011-08-07	19	0.011	0	0.002	0.001	0	0	0.001	0.001	0.014	0	0.008	303.99	0.587	1.8603
2011-08-07	20	0.011	0	0.002	0.001	0	0	0.001	0.001	0.013	0	0.007	302.115	0.656	1.83603
2011-08-07	21	0.009	0	0.001	0.001	0	0	0.001	0.001	0.012	0	0.007	301.169	0.671	1.92943
2011-08-07	22	0.007	0	0.001	0.001	0	0	0.001	0.001	0.011	0	0.006	300.672	0.659	1.90746
2011-08-07	23	0.005	0	0.001	0.001	0	0	0.001	0.001	0.011	0	0.006	299.884	0.706	1.92131
2011-08-07	24	0.004	0	0.001	0.002	0	0	0.001	0.001	0.011	0	0.007	299.187	0.774	1.90397
2011-09-07	1	0.002	0	0.001	0.001	0	0	0.001	0.001	0.011	0	0.007	298.645	0.831	1.9881
2011-09-07	2	0.002	0	0.001	0.002	0	0	0.001	0.001	0.012	0	0.007	298.251	0.873	2.00714
2011-09-07	3	0.002	0	0.001	0.002	0.001	0	0.001	0.001	0.012	0	0.008	298.21	0.872	2.00056
2011-09-07	4	0.004	0	0.001	0.002	0.002	0	0.001	0.001	0.011	0	0.009	298.22	0.866	1.99597
2011-09-07	5	0.004	0.001	0.001	0.002	0.003	0	0.001	0.001	0.01	0	0.009	298.037	0.906	2.08249
2011-09-07	6	0.003	0.002	0.001	0.002	0.004	0	0.001	0.002	0.008	0	0.009	298.017	0.915	2.10742
2011-09-07	7	0.003	0.004	0.002	0.002	0.004	0	0.001	0.002	0.006	0	0.008	298.823	0.903	0.188096
2011-09-07	8	0.005	0.009	0.006	0.003	0.004	0	0.001	0.003	0.005	0.001	0.008	300.743	0.833	1.69976
2011-09-07	9	0.009	0.016	0.011	0.002	0.003	0	0.001	0.003	0.006	0.001	0.008	302.1	0.779	1.59015
2011-09-07	10	0.011	0.02	0.015	0.002	0.003	0	0.001	0.002	0.008	0.001	0.009	303.895	0.707	1.51691
2011-09-07	11	0.011	0.023	0.017	0.001	0.002	0	0.001	0.002	0.01	0.001	0.009	305.48	0.644	1.50951
2011-09-07	12	0.009	0.024	0.022	0.001	0.001	0	0.001	0.002	0.011	0.001	0.009	306.681	0.592	1.48472
2011-09-07	13	0.008	0.024	0.021	0.001	0.001	0	0.001	0.001	0.013	0.001	0.009	307.711	0.55	1.51741
2011-09-07	14	0.004	0.01	0.013	0.001	0.001	0	0.001	0.001	0.017	0.001	0.011	306.546	0.578	1.56149
2011-09-07	15	0.006	0.001	0.005	0.001	0	0	0.001	0.001	0.017	0	0.01	306.121	0.597	1.78069
2011-09-07	16	0.01	0	0.003	0.001	0	0	0	0.001	0.012	0	0.007	305.999	0.6	1.8351
2011-09-07	17	0.012	0	0.002	0	0	0	0	0	0.009	0	0.005	306.092	0.587	0.160714
2011-09-07	18	0.013	0	0.002	0	0	0	0	0	0.007	0	0.004	305.608	0.584	0.19035
2011-09-07	19	0.012	0	0.002	0	0	0	0	0	0.007	0	0.004	304.429	0.606	0.236791
2011-09-07	20	0.011	0	0.002	0	0	0	0	0	0.006	0	0.003	302.435	0.705	0.482288
2011-09-07	21	0.011	0	0.002	0	0	0	0.001	0	0.006	0	0.004	301.427	0.741	0.757569
2011-09-07	22	0.01	0	0.002	0	0	0	0.001	0	0.005	0	0.003	300.912	0.744	0.858772
2011-09-07	23	0.01	0	0.002	0	0	0	0	0	0.005	0	0.003	300.26	0.776	0.628177
2011-09-07	24	0.01	0	0.001	0.001	0	0	0	0	0.004	0	0.003	299.815	0.8	0.647871
2011-10-07	1	0.009	0	0.001	0	0	0	0	0	0.004	0	0.002	299.486	0.805	0.735098
2011-10-07	2	0.006	0	0	0	0	0	0	0	0.003	0	0.002	298.994	0.843	0.399931
2011-10-07	3	0.005	0	0	0	0	0	0	0	0.002	0	0.001	298.704	0.869	0.46885
2011-10-07	4	0.005	0	0	0	0	0	0	0	0.003	0	0.002	298.653	0.87	0.43601
2011-10-07	5	0.005	0	0	0	0	0	0	0	0.005	0	0.003	298.561	0.882	0.484612
2011-10-07	6	0.004	0	0.001	0	0	0	0	0	0.009	0	0.005	298.566	0.898	0.757324
2011-10-07	7	0.006	0	0.002	0.001	0	0	0	0	0.011	0	0.006	299.45	0.888	0.842891
2011-10-07	8	0.012	0	0.003	0	0	0	0	0	0.012	0	0.007	301.03	0.826	0.813167
2011-10-07	9	0.005	0.001	0.006	0	0	0	0	0.001	0.011	0	0.007	302.314	0.778	-0.165472
2011-10-07	10	0.005	0	0.006	0	0	0	0	0.001	0.009	0	0.006	303.827	0.717	-0.33855
2011-10-07	11	0.006	0	0.005	0	0	0	0	0.001	0.008	0	0.005	305.111	0.671	0.0127839
2011-10-07	12	0.006	0	0.005	0	0	0	0	0.001	0.008	0	0.005	306.096	0.622	-0.0647941
2011-10-07	13	0.008	0	0.004	0	0	0	0	0.001	0.007	0	0.005	307.366	0.566	0.0467716
2011-10-07	14	0.01	0	0.002	0	0	0	0	0.001	0.005	0	0.003	307.473	0.566	0.478857
2011-10-07	15	0.01	0	0.002	0	0	0	0	0	0.004	0	0.003	306.372	0.609	0.0377631
2011-10-07	16	0.01	0	0.002	0	0	0	0	0	0.004	0	0.002	305.332	0.646	0.230116
2011-10-07	17	0.008	0	0.002	0	0	0	0	0	0.003	0	0.002	304.216	0.676	0.162943
2011-10-07	18	0.009	0	0.002	0	0	0	0	0	0.003	0	0.002	303.14	0.716	0.336782
2011-10-07	19	0.011	0	0.002	0	0	0	0	0	0.003	0	0.002	301.759	0.77	0.596018
2011-10-07	20	0.013	0	0.002	0	0	0	0	0	0.003	0	0.002	300.52	0.812	0.827981
2011-10-07	21	0.014	0	0.003	0	0	0	0	0	0.003	0	0.002	299.784	0.836	0.987342
2011-10-07	22	0.014	0	0.003	0	0	0	0	0	0.003	0	0.002	299.311	0.854	1.03951
2011-10-07	23	0.013	0	0.003	0	0	0	0.001	0	0.003	0	0.002	298.906	0.874	1.46871
2011-10-07	24	0.011	0	0.002	0	0	0	0.001	0	0.002	0	0.002	298.656	0.894	1.39803
2011-11-07	1	0.009	0	0.001	0	0	0	0.001	0	0.002	0	0.001	298.505	0.91	1.67213
2011-11-07	2	0.006	0	0.001	0	0	0	0.001	0	0.001	0	0.001	298.478	0.905	1.4103
2011-11-07	3	0.004	0	0.001	0	0	0	0	0	0.001	0	0.001	298.381	0.914	0.734662
2011-11-07	4	0.004	0	0.001	0	0	0	0	0	0.001	0	0.001	298.349	0.922	0.802742
2011-11-07	5	0.004	0	0	0	0	0	0	0	0.001	0	0.001	298.304	0.929	0.579519
2011-11-07	6	0.005	0	0	0	0	0	0	0	0.002	0	0.001	298.354	0.928	0.703785
2011-11-07	7	0.007	0	0.001	0	0	0	0	0	0.002	0	0.001	299.175	0.922	1.12964
2011-11-07	8	0.007	0	0.001	0	0	0	0	0	0.002	0	0.001	300.603	0.864	0.758121
2011-11-07	9	0.001	0	0.001	0	0	0	0	0	0.003	0	0.002	301.225	0.845	-0.0227405
2011-11-07	10	0	0	0	0	0	0	0	0	0	0	0	302.074	0.824	Infinity
2011-11-07	11	0.004	0	0	0	0	0	0	0	0	0	0	303.022	0.799	0
2011-11-07	12	0.004	0	0.001	0	0	0	0	0	0	0	0	303.83	0.781	0.519832
2011-11-07	13	0.005	0	0.001	0	0	0	0	0	0.001	0	0.001	304.637	0.743	0.0165781
2011-11-07	14	0.005	0	0.001	0	0	0	0	0	0.001	0	0.001	304.935	0.746	0.0295327
2011-11-07	15	0.004	0	0.001	0	0	0	0	0	0.002	0	0.001	304.594	0.759	0.0644744
2011-11-07	16	0.003	0	0.001	0	0	0	0	0	0.003	0	0.001	304.279	0.763	0.0748971
2011-11-07	17	0.003	0	0.002	0	0	0	0	0	0.003	0	0.002	303.411	0.763	-0.107961
2011-11-07	18	0.003	0	0.002	0	0	0	0	0	0.004	0	0.002	303.48	0.772	0.043959
2011-11-07	19	0.003	0	0.002	0	0	0	0	0	0.004	0	0.002	302.689	0.786	0.121071
2011-11-07	20	0.005	0	0.001	0	0	0	0	0	0.004	0	0.002	301.416	0.836	0.518867
2011-11-07	21	0.007	0	0.001	0	0	0	0	0	0.004	0	0.003	300.676	0.852	0.592634
2011-11-07	22	0.009	0	0.001	0	0	0	0	0	0.005	0	0.003	300.186	0.862	0.842845
2011-11-07	23	0.009	0	0.001	0	0	0	0.001	0	0.005	0	0.003	299.788	0.873	1.11924
2011-11-07	24	0.008	0	0.001	0	0	0	0.001	0	0.005	0	0.003	299.414	0.888	1.15226
2011-12-07	1	0.008	0	0.001	0	0	0	0.001	0	0.005	0	0.003	299.041	0.905	1.2614
2011-12-07	2	0.007	0	0.001	0	0	0	0.001	0	0.006	0	0.004	298.812	0.903	1.05371
2011-12-07	3	0.006	0	0.001	0	0	0	0.001	0	0.006	0	0.004	298.531	0.919	1.07456
2011-12-07	4	0.006	0	0.001	0	0.001	0	0.001	0	0.006	0	0.004	298.347	0.927	1.28662
2011-12-07	5	0.006	0	0.001	0	0.001	0	0.001	0	0.007	0	0.004	298.182	0.934	1.36279
2011-12-07	6	0.003	0	0.001	0	0.001	0	0.001	0	0.008	0	0.005	297.991	0.942	1.02271
2011-12-07	7	0.002	0	0.001	0	0	0	0.001	0	0.008	0	0.006	298.359	0.943	0.246309
2011-12-07	8	0.001	0	0.001	0	0	0	0	0	0.009	0	0.009	299.695	0.899	0.220557
2011-12-07	9	0.001	0	0.002	0	0	0	0	0	0.011	0	0.012	301.188	0.841	0.0473358
2011-12-07	10	0.001	0.001	0.004	0	0	0	0	0	0.012	0	0.011	302.854	0.766	0.171446
2011-12-07	11	0.001	0.001	0.006	0	0	0	0	0	0.011	0	0.01	304.524	0.709	0.229044
2011-12-07	12	0.001	0.001	0.006	0	0	0	0	0	0.01	0	0.009	306.35	0.641	0.322903
2011-12-07	13	0.001	0.001	0.007	0	0	0	0	0	0.01	0	0.009	307.848	0.581	0.435231
2011-12-07	14	0.001	0.002	0.008	0	0	0	0	0	0.01	0	0.009	308.33	0.567	0.463342
2011-12-07	15	0.001	0.004	0.009	0	0	0	0	0	0.011	0	0.01	307.836	0.581	0.458314
2011-12-07	16	0.001	0.005	0.011	0	0	0	0	0	0.012	0	0.01	307.077	0.602	0.294393
2011-12-07	17	0.001	0.006	0.01	0	0	0	0	0	0.012	0	0.01	306.017	0.629	0.244032
2011-12-07	18	0.001	0.005	0.009	0	0	0	0	0	0.012	0	0.012	304.792	0.659	0.263687
2011-12-07	19	0.001	0.004	0.008	0	0	0	0	0	0.013	0	0.011	303.452	0.69	0.170128
2011-12-07	20	0.002	0.003	0.007	0	0	0	0	0	0.015	0	0.01	301.617	0.754	0.149134
2011-12-07	21	0.002	0.002	0.005	0	0	0	0	0	0.017	0	0.009	300.576	0.787	0.148719
2011-12-07	22	0.005	0.002	0.005	0	0	0	0	0	0.016	0	0.009	299.946	0.81	0.392672
2011-12-07	23	0.007	0.001	0.004	0	0	0	0	0	0.014	0	0.007	299.467	0.839	0.755675
2011-12-07	24	0.007	0.001	0.003	0	0	0	0	0	0.013	0	0.007	298.976	0.879	0.904983
07/13/2011	1	0.005	0	0.001	0	0	0	0	0	0.011	0	0.006	298.565	0.916	0.991525
07/13/2011	2	0.003	0	0.001	0	0	0	0	0	0.01	0	0.005	298.361	0.92	0.887952
07/13/2011	3	0.002	0	0.001	0	0	0	0	0	0.01	0	0.005	298.187	0.929	0.859258
07/13/2011	4	0.003	0	0.001	0	0	0	0	0	0.01	0	0.005	297.943	0.951	1.15633
07/13/2011	5	0.003	0	0.001	0	0.001	0	0	0	0.011	0	0.006	297.788	0.96	1.31779
07/13/2011	6	0.004	0.001	0.001	0	0.002	0	0.001	0	0.011	0	0.007	297.734	0.955	1.37406
07/13/2011	7	0.006	0.001	0.001	0	0.003	0	0.001	0.001	0.01	0	0.007	298.449	0.946	1.62164
07/13/2011	8	0.009	0.004	0.003	0.001	0.004	0	0.001	0.001	0.008	0	0.008	300.128	0.901	1.99661
07/13/2011	9	0.01	0.009	0.005	0.001	0.003	0	0.001	0.001	0.007	0	0.006	301.674	0.846	1.86381
07/13/2011	10	0.008	0.01	0.006	0	0.001	0	0	0.001	0.007	0	0.005	303.091	0.791	0.447146
07/13/2011	11	0.007	0.006	0.007	0	0.001	0	0	0	0.007	0	0.004	304.401	0.744	0.36369
07/13/2011	12	0.005	0.004	0.009	0	0	0	0	0	0.009	0	0.005	305.676	0.684	-0.0465681
07/13/2011	13	0.001	0.002	0.009	0	0	0	0	0	0.011	0	0.006	306.449	0.65	1.22681
07/13/2011	14	0.001	0.002	0.009	0	0	0	0	0	0.012	0	0.006	306.545	0.65	-0.350344
07/13/2011	15	0.001	0.001	0.008	0	0	0	0	0	0.011	0	0.006	305.793	0.667	1.24029
07/13/2011	16	0.002	0.001	0.006	0	0	0	0	0	0.009	0	0.006	303.467	0.728	0.355332
07/13/2011	17	0.002	0	0.005	0	0	0	0	0	0.009	0	0.006	302.841	0.771	0.445497
07/13/2011	18	0.002	0.001	0.005	0	0	0	0	0	0.01	0	0.006	301.649	0.801	1.28631
07/13/2011	19	0.004	0.001	0.005	0	0	0	0	0	0.01	0	0.006	300.809	0.836	0.332145
07/13/2011	20	0.006	0.001	0.005	0	0	0	0	0	0.009	0	0.005	299.543	0.858	0.690059
07/13/2011	21	0.008	0.002	0.005	0	0	0	0.001	0	0.008	0	0.005	298.731	0.889	0.834797
07/13/2011	22	0.008	0.003	0.004	0	0	0	0.001	0.001	0.008	0	0.005	298.23	0.906	1.21795
07/13/2011	23	0.009	0.003	0.003	0	0	0	0.001	0.001	0.007	0	0.005	297.941	0.909	1.27629
07/13/2011	24	0.01	0.003	0.004	0	0	0	0.001	0.001	0.007	0	0.005	297.709	0.916	1.35664
07/14/2011	1	0.01	0.003	0.004	0	0.001	0	0.001	0.001	0.006	0	0.005	297.589	0.912	1.35149
07/14/2011	2	0.01	0.004	0.004	0	0.001	0	0.001	0.001	0.006	0	0.005	297.462	0.916	1.40397
07/14/2011	3	0.01	0.004	0.004	0	0.001	0	0.002	0.001	0.005	0	0.005	297.357	0.919	1.47566
07/14/2011	4	0.009	0.004	0.004	0	0.001	0	0.002	0.001	0.006	0	0.005	297.249	0.925	1.53015
07/14/2011	5	0.008	0.004	0.003	0	0.001	0	0.002	0.001	0.006	0	0.005	297.18	0.92	1.47514
07/14/2011	6	0.009	0.003	0.003	0	0.001	0	0.002	0.001	0.006	0	0.006	297.081	0.932	1.41749
07/14/2011	7	0.009	0.003	0.003	0	0.001	0	0.002	0.001	0.006	0	0.006	297.94	0.907	1.27434
07/14/2011	8	0.01	0.005	0.006	0.001	0.002	0	0.002	0.001	0.007	0	0.007	299.884	0.855	1.81292
07/14/2011	9	0.027	0.031	0.011	0	0.002	0	0.002	0.001	0.013	0	0.01	301.466	0.81	1.34125
07/14/2011	10	0.041	0.054	0.015	0	0.001	0	0.002	0.001	0.016	0	0.01	303.149	0.749	1.50555
07/14/2011	11	0.033	0.055	0.02	0	0.001	0	0.001	0.001	0.019	0	0.011	304.661	0.692	1.136
07/14/2011	12	0.009	0.016	0.015	0	0	0	0.001	0.001	0.021	0	0.012	304.666	0.681	-0.405511
07/14/2011	13	0.003	0.002	0.008	0	0	0	0	0	0.014	0	0.009	305.646	0.651	0.389287
07/14/2011	14	0.002	0.001	0.005	0	0	0	0	0	0.009	0	0.007	305.746	0.652	-0.00400468
07/14/2011	15	0.002	0	0.004	0	0	0	0	0	0.008	0	0.005	305.004	0.675	-0.268009
07/14/2011	16	0.002	0.001	0.004	0	0	0	0	0	0.006	0	0.004	303.906	0.712	-0.25229
07/14/2011	17	0.002	0.001	0.003	0	0	0	0	0	0.005	0	0.004	302.994	0.749	0.249228
07/14/2011	18	0.002	0.001	0.004	0	0	0	0	0	0.006	0	0.004	302.169	0.795	-0.0302987
07/14/2011	19	0.002	0.002	0.005	0	0	0	0	0	0.007	0	0.005	300.974	0.852	0.592255
07/14/2011	20	0.001	0.003	0.006	0	0	0	0	0	0.009	0	0.005	300.034	0.896	0.422639
07/14/2011	21	0.002	0.003	0.006	0	0	0	0	0	0.009	0	0.005	299.486	0.918	0.628415
07/14/2011	22	0.003	0.004	0.006	0	0	0	0	0	0.009	0	0.005	298.796	0.94	0.944729
07/14/2011	23	0.004	0.004	0.006	0	0	0	0	0.001	0.01	0	0.006	298.214	0.96	0.680965
07/14/2011	24	0.007	0.005	0.005	0	0	0	0.001	0.001	0.011	0	0.007	297.883	0.97	1.37847
07/15/2011	1	0.01	0.006	0.005	0	0.001	0	0.001	0.002	0.011	0	0.008	297.703	0.971	1.73854
07/15/2011	2	0.011	0.006	0.005	0	0.001	0	0.001	0.003	0.012	0	0.01	297.591	0.968	1.73967
07/15/2011	3	0.012	0.007	0.005	0	0.001	0.001	0.002	0.004	0.014	0	0.012	297.527	0.963	1.90827
07/15/2011	4	0.013	0.007	0.005	0.001	0.002	0.001	0.002	0.004	0.017	0.001	0.014	297.476	0.96	2.06838
07/15/2011	5	0.013	0.006	0.004	0.001	0.002	0.001	0.002	0.004	0.02	0.001	0.016	297.441	0.956	2.01269
07/15/2011	6	0.014	0.005	0.003	0.001	0.002	0.001	0.003	0.004	0.023	0.001	0.018	297.428	0.952	2.02344
07/15/2011	7	0.014	0.004	0.003	0.001	0.003	0.001	0.003	0.004	0.025	0.001	0.019	298.255	0.935	2.01667
07/15/2011	8	0.012	0.006	0.006	0.001	0.003	0.001	0.003	0.003	0.029	0.001	0.02	299.512	0.873	1.78394
07/15/2011	9	0.004	0.006	0.011	0	0.001	0	0.001	0.001	0.026	0	0.015	300.119	0.844	-0.102628
07/15/2011	10	0.002	0.002	0.008	0	0.001	0	0.001	0.001	0.02	0	0.011	301.467	0.811	-0.104848
07/15/2011	11	0.002	0.001	0.006	0	0	0	0	0	0.015	0	0.008	301.02	0.793	0.117263
07/15/2011	12	0.004	0	0.005	0	0	0	0	0.001	0.014	0	0.008	302.296	0.776	-0.0329703
07/15/2011	13	0.002	0	0.005	0	0	0	0	0.001	0.012	0	0.007	303.165	0.741	-0.452314
07/15/2011	14	0.002	0	0.005	0	0	0	0	0	0.009	0	0.006	302.758	0.747	0.389069
07/15/2011	15	0.002	0	0.004	0	0	0	0	0	0.008	0	0.006	302.106	0.773	0.19048
07/15/2011	16	0.001	0.001	0.003	0	0	0	0	0	0.008	0	0.007	301.591	0.8	0.168893
07/15/2011	17	0.001	0.001	0.003	0	0	0	0	0	0.007	0	0.007	300.943	0.823	0.133601
07/15/2011	18	0.001	0.001	0.003	0	0	0	0	0	0.006	0	0.007	300.144	0.859	0.0590382
07/15/2011	19	0.001	0.001	0.003	0	0	0	0	0	0.006	0	0.008	299.771	0.879	-0.00797932
07/15/2011	20	0.001	0.001	0.002	0	0	0	0	0	0.006	0	0.007	298.807	0.909	0.149795
07/15/2011	21	0.001	0.001	0.002	0	0	0	0	0	0.006	0	0.006	298.226	0.945	0.463224
07/15/2011	22	0.001	0.002	0.001	0	0	0	0	0	0.008	0	0.007	297.97	0.958	0.632791
07/15/2011	23	0.001	0.003	0.001	0	0	0	0	0	0.009	0	0.009	297.822	0.96	0.497969
07/15/2011	24	0.001	0.002	0.001	0	0.001	0	0	0	0.008	0	0.008	297.68	0.967	0.51892
07/16/2011	1	0.001	0.001	0.001	0	0.001	0	0.001	0	0.006	0	0.006	297.578	0.97	0.560387
07/16/2011	2	0.002	0.001	0.001	0	0.001	0	0.001	0	0.004	0	0.003	297.689	0.958	1.08046
07/16/2011	3	0.003	0	0.001	0	0.001	0	0.001	0	0.001	0	0.002	297.465	0.966	1.25234
07/16/2011	4	0.003	0	0.001	0	0.001	0	0.001	0	0.001	0	0.001	297.345	0.966	1.88804
07/16/2011	5	0.004	0	0.001	0	0.001	0	0.001	0	0.001	0	0.002	297.188	0.969	1.46804
07/16/2011	6	0.003	0.001	0.001	0	0.001	0	0.001	0	0.001	0	0.002	297.082	0.96	1.14907
07/16/2011	7	0.004	0.001	0.002	0	0.001	0	0	0	0.002	0	0.002	297.753	0.931	1.03279
07/16/2011	8	0.003	0	0.002	0	0	0	0	0	0.002	0	0.002	298.688	0.906	0.441395
07/16/2011	9	0.002	0	0.003	0	0	0	0	0	0.003	0	0.002	299.594	0.882	0.23284
07/16/2011	10	0.002	0	0.002	0	0	0	0	0	0.002	0	0.001	299.786	0.864	0.262243
07/16/2011	11	0.002	0	0.002	0	0	0	0	0	0.002	0	0.001	301.227	0.822	0.0688269
07/16/2011	12	0.002	0	0.002	0	0	0	0	0	0.002	0	0.001	301.841	0.809	0.0178934
07/16/2011	13	0.001	0.001	0.002	0	0	0	0	0	0.003	0	0.002	301.87	0.81	-0.154916
07/16/2011	14	0.001	0.001	0.002	0	0	0	0	0	0.004	0	0.003	302.317	0.81	0.31542
07/16/2011	15	0.001	0.001	0.002	0	0	0	0	0	0.004	0	0.004	302.002	0.824	0.196218
07/16/2011	16	0.001	0.001	0.003	0	0	0	0	0	0.004	0	0.004	301.61	0.839	0.213897
07/16/2011	17	0.001	0.001	0.003	0	0	0	0	0	0.004	0	0.004	301.072	0.858	0.236972
07/16/2011	18	0.001	0	0.003	0	0	0	0	0	0.004	0	0.003	300.447	0.877	0.52651
07/16/2011	19	0.002	0	0.002	0	0	0	0	0	0.003	0	0.002	299.681	0.896	0.338599
07/16/2011	20	0.002	0	0.002	0	0	0	0	0	0.002	0	0.002	298.834	0.905	0.291206
07/16/2011	21	0.002	0	0.002	0	0	0	0	0	0.002	0	0.002	298.221	0.917	0.353565
07/16/2011	22	0.002	0	0.002	0	0	0	0	0	0.003	0	0.002	297.73	0.915	0.523159
07/16/2011	23	0.003	0	0.002	0	0	0	0	0	0.003	0	0.002	297.064	0.93	0.806248
07/16/2011	24	0.003	0	0.002	0	0	0	0	0	0.003	0	0.002	296.489	0.943	0.906641
07/17/2011	1	0.003	0	0.003	0	0	0	0	0	0.004	0	0.003	296.048	0.928	0.702387
07/17/2011	2	0.003	0	0.002	0	0	0	0	0	0.005	0	0.003	295.572	0.932	0.879932
07/17/2011	3	0.004	0	0.002	0	0.001	0	0	0	0.004	0	0.003	295.509	0.931	1.08027
07/17/2011	4	0.004	0.001	0.002	0	0.001	0	0.001	0	0.005	0	0.003	295.503	0.934	1.26251
07/17/2011	5	0.004	0.001	0.002	0	0.001	0	0	0	0.005	0	0.003	295.635	0.925	1.18335
07/17/2011	6	0.004	0.001	0.002	0	0.001	0	0	0	0.006	0	0.004	295.67	0.932	1.07163
07/17/2011	7	0.004	0.001	0.003	0	0.001	0	0	0	0.006	0	0.003	296.276	0.929	1.24886
07/17/2011	8	0.004	0	0.004	0	0	0	0	0	0.007	0	0.004	297.507	0.891	0.706481
07/17/2011	9	0.003	0	0.004	0	0	0	0	0	0.007	0	0.004	297.751	0.866	0.481767
07/17/2011	10	0.004	0	0.005	0	0	0	0	0	0.007	0	0.004	299.769	0.797	0.286405
07/17/2011	11	0.004	0	0.005	0	0	0	0	0	0.007	0	0.004	300.103	0.765	0.194715
07/17/2011	12	0.005	0	0.005	0	0	0	0	0	0.007	0	0.004	301.623	0.716	0.128214
07/17/2011	13	0.004	0	0.007	0	0	0	0	0	0.007	0	0.004	302.406	0.686	-0.0486495
07/17/2011	14	0.004	0	0.007	0	0	0	0	0	0.007	0	0.004	302.666	0.678	-0.0753362
07/17/2011	15	0.004	0	0.007	0	0	0	0	0	0.006	0	0.003	302.252	0.686	0.0304472
07/17/2011	16	0.005	0	0.005	0	0	0	0	0	0.005	0	0.003	301.019	0.707	0.108771
07/17/2011	17	0.005	0	0.004	0	0	0	0	0	0.005	0	0.003	301.437	0.708	0.0959657
07/17/2011	18	0.004	0	0.004	0.001	0.001	0	0	0	0.005	0	0.003	300.549	0.725	0.250793
07/17/2011	19	0.004	0.001	0.004	0.001	0.001	0	0	0.001	0.006	0	0.004	299.549	0.752	1.61796
07/17/2011	20	0.004	0.001	0.004	0.001	0.001	0	0.001	0.001	0.006	0	0.005	298.525	0.774	1.66083
07/17/2011	21	0.004	0.001	0.003	0.001	0.001	0	0.001	0.001	0.007	0	0.006	297.966	0.795	1.74034
07/17/2011	22	0.004	0.001	0.002	0.001	0.001	0	0.001	0.001	0.009	0	0.006	297.563	0.818	1.8376
07/17/2011	23	0.004	0.001	0.002	0.001	0.001	0	0.001	0.001	0.01	0	0.007	297.234	0.839	1.85349
07/17/2011	24	0.004	0.001	0.002	0.001	0.001	0	0.001	0.001	0.011	0	0.008	296.89	0.87	1.88436
07/18/2011	1	0.005	0.001	0.002	0.001	0.001	0	0.001	0.001	0.011	0	0.008	296.674	0.886	1.92202
07/18/2011	2	0.006	0.001	0.003	0.001	0.001	0	0.001	0.001	0.011	0	0.008	296.426	0.908	1.88905
07/18/2011	3	0.006	0.002	0.003	0.001	0.001	0	0.001	0.001	0.011	0	0.008	296.288	0.91	1.88373
07/18/2011	4	0.007	0.002	0.003	0.001	0.002	0.001	0.001	0.002	0.01	0	0.008	296.215	0.899	1.91626
07/18/2011	5	0.007	0.003	0.003	0.001	0.002	0.001	0.002	0.002	0.009	0	0.009	296.067	0.9	1.92871
07/18/2011	6	0.008	0.003	0.003	0.001	0.002	0.001	0.002	0.002	0.008	0	0.009	295.961	0.898	1.92449
07/18/2011	7	0.008	0.005	0.004	0.001	0.003	0.001	0.002	0.003	0.007	0.001	0.009	296.407	0.884	1.82379
07/18/2011	8	0.01	0.011	0.008	0.001	0.003	0.001	0.002	0.002	0.006	0.001	0.008	297.777	0.841	1.71058
07/18/2011	9	0.01	0.014	0.011	0	0.002	0	0.001	0.001	0.005	0	0.006	299.494	0.775	-0.147854
07/18/2011	10	0.01	0.009	0.008	0	0.001	0	0.001	0.001	0.004	0	0.004	301.044	0.714	0.610942
07/18/2011	11	0.008	0.005	0.007	0	0.001	0	0.001	0.001	0.005	0	0.004	302.559	0.657	0.507362
07/18/2011	12	0.007	0.003	0.006	0	0.001	0	0.001	0	0.007	0	0.005	303.816	0.612	-0.096893
07/18/2011	13	0.006	0.002	0.006	0	0.001	0	0	0	0.01	0	0.006	304.995	0.571	-0.0943989
07/18/2011	14	0.006	0.001	0.006	0	0.001	0	0	0	0.013	0	0.007	305.795	0.534	-0.11337
07/18/2011	15	0.006	0.001	0.006	0	0.001	0	0	0	0.016	0	0.009	305.555	0.528	-0.154121
07/18/2011	16	0.008	0.001	0.006	0	0.001	0	0	0	0.017	0	0.01	305.372	0.533	-0.0886375
07/18/2011	17	0.009	0.001	0.006	0	0.001	0	0	0.001	0.018	0	0.01	304.872	0.544	0.125073
07/18/2011	18	0.008	0.001	0.005	0	0.001	0	0	0.001	0.019	0	0.011	304.269	0.548	0.00818351
07/18/2011	19	0.01	0.001	0.005	0	0.001	0	0.001	0.001	0.017	0	0.01	303.561	0.545	0.300641
07/18/2011	20	0.014	0.001	0.004	0	0.001	0	0.001	0.001	0.015	0	0.01	301.938	0.591	0.50775
07/18/2011	21	0.02	0.001	0.004	0	0.001	0	0.001	0.002	0.012	0	0.01	300.65	0.621	0.807892
07/18/2011	22	0.026	0.001	0.004	0	0.001	0.001	0.002	0.003	0.009	0	0.009	299.623	0.664	1.49762
07/18/2011	23	0.029	0.002	0.005	0	0.001	0.001	0.002	0.004	0.008	0	0.01	298.792	0.714	1.64877
07/18/2011	24	0.032	0.002	0.005	0	0.001	0.001	0.002	0.004	0.006	0	0.01	298.043	0.773	1.7405
07/19/2011	1	0.032	0.003	0.006	0	0.001	0.001	0.003	0.005	0.006	0	0.01	297.354	0.838	2.07096
07/19/2011	2	0.03	0.003	0.006	0	0.002	0.001	0.003	0.005	0.007	0	0.011	296.859	0.882	2.09881
07/19/2011	3	0.028	0.004	0.006	0	0.002	0.001	0.003	0.005	0.008	0.001	0.012	296.578	0.899	2.04696
07/19/2011	4	0.026	0.004	0.006	0	0.002	0.001	0.003	0.006	0.009	0.001	0.013	296.373	0.906	2.06997
07/19/2011	5	0.026	0.004	0.006	0	0.002	0.001	0.003	0.006	0.01	0.001	0.013	296.207	0.911	2.0962
07/19/2011	6	0.027	0.005	0.006	0	0.002	0.001	0.003	0.006	0.011	0.001	0.014	296.074	0.918	2.1093
07/19/2011	7	0.028	0.005	0.006	0	0.002	0.001	0.003	0.006	0.01	0.001	0.014	296.757	0.924	2.08442
07/19/2011	8	0.022	0.004	0.006	0	0.002	0.001	0.003	0.006	0.01	0	0.014	299.118	0.838	1.63481
07/19/2011	9	0.011	0.015	0.012	0	0.002	0.001	0.002	0.004	0.021	0.001	0.017	300.99	0.767	0.350151
07/19/2011	10	0.005	0.052	0.016	0	0.002	0.001	0.001	0.003	0.028	0	0.019	302.824	0.678	-0.514728
07/19/2011	11	0.003	0.103	0.023	0	0.001	0	0.001	0.002	0.03	0	0.021	304.104	0.62	-0.434225
07/19/2011	12	0.002	0.086	0.02	0	0.001	0	0.001	0.001	0.029	0	0.021	305.167	0.576	-0.488583
07/19/2011	13	0.002	0.06	0.017	0	0.001	0	0.001	0.001	0.028	0	0.02	306.473	0.536	-0.560166
07/19/2011	14	0.001	0.035	0.013	0	0.001	0	0	0.001	0.022	0	0.021	307.162	0.52	-0.0386335
07/19/2011	15	0	0.018	0.011	0	0	0	0	0.001	0.018	0	0.023	306.993	0.534	-0.435227
07/19/2011	16	0	0.011	0.01	0	0	0	0	0.001	0.016	0	0.024	306.496	0.561	-0.559232
07/19/2011	17	0	0.009	0.009	0	0	0	0	0.001	0.016	0	0.024	305.752	0.591	-0.528727
07/19/2011	18	0	0.009	0.007	0	0	0	0	0.001	0.018	0	0.023	304.88	0.624	-0.352751
07/19/2011	19	0	0.008	0.005	0	0	0	0	0.001	0.019	0	0.021	303.909	0.658	-0.107634
07/19/2011	20	0.001	0.006	0.004	0	0	0	0.001	0.001	0.023	0	0.021	302.283	0.718	-0.0541644
07/19/2011	21	0.002	0.005	0.003	0.001	0	0	0.001	0.001	0.027	0	0.021	301.056	0.76	-0.158075
07/19/2011	22	0.002	0.004	0.002	0.001	0	0	0.001	0.002	0.03	0	0.022	300.184	0.792	-0.116375
07/19/2011	23	0.003	0.003	0.002	0.001	0.001	0	0.001	0.002	0.031	0	0.021	299.487	0.822	-0.017145
07/19/2011	24	0.003	0.003	0.002	0.001	0.001	0	0.001	0.002	0.03	0	0.021	298.927	0.851	0.0713911
07/20/2011	1	0.003	0.003	0.002	0.001	0.001	0	0.001	0.002	0.029	0	0.02	298.484	0.876	0.160557
07/20/2011	2	0.003	0.002	0.001	0.001	0.001	0	0.001	0.002	0.028	0	0.019	298.084	0.899	0.231954
07/20/2011	3	0.003	0.002	0.001	0.001	0.001	0	0.001	0.002	0.026	0	0.017	297.833	0.909	0.291375
07/20/2011	4	0.003	0.001	0.001	0.001	0.002	0	0.001	0.001	0.024	0	0.015	297.641	0.915	2.15801
07/20/2011	5	0.004	0.001	0.001	0.001	0.002	0	0.001	0.002	0.023	0	0.014	297.493	0.919	2.15235
07/20/2011	6	0.006	0.001	0.001	0.001	0.003	0	0.001	0.002	0.02	0	0.014	297.393	0.923	2.14792
07/20/2011	7	0.009	0.001	0.001	0.001	0.004	0.001	0.001	0.002	0.019	0	0.014	298.153	0.909	2.16525
07/20/2011	8	0.009	0.002	0.001	0.002	0.004	0.001	0.002	0.003	0.018	0	0.015	299.953	0.861	2.10526
07/20/2011	9	0.02	0.006	0.005	0.001	0.003	0	0.001	0.002	0.019	0	0.014	301.229	0.827	1.78904
07/20/2011	10	0.021	0.008	0.006	0	0.001	0	0.001	0.002	0.02	0	0.013	302.389	0.793	1.0768
07/20/2011	11	0.013	0.007	0.006	0	0.001	0	0	0.001	0.021	0	0.012	303.502	0.76	0.638192
07/20/2011	12	0.005	0.002	0.006	0	0	0	0	0.001	0.02	0	0.011	303.004	0.774	0.030229
07/20/2011	13	0.003	0	0.005	0	0	0	0	0	0.016	0	0.01	303.939	0.747	0.614275
07/20/2011	14	0.002	0	0.005	0	0	0	0	0	0.013	0	0.009	304.619	0.723	0.136427
07/20/2011	15	0.002	0	0.004	0	0	0	0	0	0.011	0	0.008	304.595	0.715	0.111623
07/20/2011	16	0.002	0	0.003	0	0	0	0	0	0.009	0	0.006	302.969	0.739	0.370542
07/20/2011	17	0.002	0	0.003	0	0	0	0	0	0.008	0	0.006	303.126	0.769	0.220329
07/20/2011	18	0.002	0	0.002	0	0	0	0	0	0.008	0	0.006	302.067	0.794	0.248124
07/20/2011	19	0.002	0	0.002	0	0	0	0	0	0.008	0	0.006	301.458	0.817	0.32465
07/20/2011	20	0.002	0	0.002	0	0	0	0	0	0.008	0	0.006	300.31	0.84	0.365996
07/20/2011	21	0.002	0	0.001	0	0	0	0	0	0.011	0	0.006	299.562	0.861	0.329427
07/20/2011	22	0.005	0	0.001	0	0	0	0	0	0.011	0	0.006	299.1	0.87	0.680567
07/20/2011	23	0.007	0	0.001	0	0	0	0	0	0.011	0	0.006	298.874	0.876	0.898998
07/20/2011	24	0.007	0	0.001	0	0	0	0	0	0.011	0	0.006	298.694	0.885	0.949873
07/21/2011	1	0.006	0	0.001	0	0	0	0	0	0.011	0	0.006	298.475	0.897	0.937568
07/21/2011	2	0.005	0	0.001	0	0	0	0	0	0.011	0	0.006	298.233	0.906	0.92299
07/21/2011	3	0.005	0	0.001	0	0	0	0	0	0.011	0	0.006	297.953	0.916	0.997894
07/21/2011	4	0.005	0	0.002	0	0	0	0	0	0.011	0	0.006	297.725	0.923	1.00567
07/21/2011	5	0.005	0.001	0.002	0	0	0	0	0	0.011	0	0.006	297.578	0.929	1.08801
07/21/2011	6	0.006	0.001	0.002	0	0	0	0	0	0.011	0	0.006	297.506	0.932	1.16702
07/21/2011	7	0.008	0.002	0.002	0	0	0	0.001	0	0.011	0	0.006	297.698	0.936	1.40136
07/21/2011	8	0.003	0.003	0.003	0	0	0	0	0	0.011	0	0.006	299.518	0.885	0.583091
07/21/2011	9	0.001	0.008	0.006	0	0	0	0	0	0.009	0	0.011	300.404	0.871	0.00380621
07/21/2011	10	0	0.005	0.007	0	0	0	0	0	0.01	0	0.013	301.442	0.835	-0.161645
07/21/2011	11	0	0.004	0.007	0	0	0	0	0	0.01	0	0.013	302.698	0.781	-0.242317
07/21/2011	12	0	0.002	0.007	0	0	0	0	0	0.009	0	0.013	303.548	0.741	-0.36157
07/21/2011	13	0	0.001	0.005	0	0	0	0	0	0.007	0	0.01	303.611	0.722	-0.37839
07/21/2011	14	0	0	0.003	0	0	0	0	0	0.006	0	0.008	303.777	0.715	-0.327289
07/21/2011	15	0	0	0.003	0	0	0	0	0	0.005	0	0.007	303.658	0.718	-0.364574
07/21/2011	16	0	0	0.002	0	0	0	0	0	0.004	0	0.006	303.643	0.719	-0.408056
07/21/2011	17	0	0	0.002	0	0	0	0	0	0.003	0	0.005	303.447	0.716	-0.460429
07/21/2011	18	0	0	0.001	0	0	0	0	0	0.003	0	0.005	303.143	0.71	-0.473358
07/21/2011	19	0.001	0	0.001	0	0	0	0	0	0.004	0	0.004	302.046	0.742	0.142816
07/21/2011	20	0.001	0	0.001	0	0	0	0	0	0.005	0	0.004	300.749	0.783	0.094532
07/21/2011	21	0.001	0	0.001	0	0	0	0	0	0.005	0	0.004	299.964	0.8	0.125489
07/21/2011	22	0.001	0	0.001	0	0	0	0	0	0.005	0	0.004	299.323	0.829	0.195885
07/21/2011	23	0.001	0	0.001	0	0	0	0	0	0.004	0	0.004	298.719	0.88	0.227261
07/21/2011	24	0.001	0	0.001	0	0	0	0	0	0.003	0	0.004	298.32	0.911	0.150015
07/22/2011	1	0.002	0.001	0.001	0	0	0	0	0	0.008	0	0.006	297.944	0.938	0.834556
07/22/2011	2	0.014	0.003	0.001	0	0.001	0	0.002	0	0.011	0	0.007	297.655	0.957	1.95338
07/22/2011	3	0.022	0.004	0.001	0	0.002	0	0.003	0	0.009	0	0.007	297.596	0.948	2.15602
07/22/2011	4	0.021	0.004	0.001	0	0.002	0	0.004	0.001	0.008	0	0.008	297.288	0.967	2.41109
07/22/2011	5	0.021	0.005	0.001	0.001	0.003	0	0.004	0.001	0.006	0	0.008	297.052	0.982	2.62048
07/22/2011	6	0.022	0.006	0.001	0.001	0.003	0	0.005	0.001	0.005	0	0.008	296.875	0.982	2.71008
07/22/2011	7	0.022	0.008	0.002	0.001	0.003	0	0.005	0.002	0.003	0	0.007	297.508	0.962	2.77598
07/22/2011	8	0.021	0.012	0.006	0.001	0.003	0	0.004	0.002	0.002	0.001	0.007	298.745	0.94	2.35843
07/22/2011	9	0.018	0.028	0.024	0.001	0.003	0	0.003	0.002	0.003	0.001	0.006	300.377	0.87	1.96875
07/22/2011	10	0.009	0.033	0.033	0	0.002	0	0.002	0.002	0.008	0.001	0.008	301.955	0.779	-1.12813
07/22/2011	11	0.002	0.023	0.025	0	0.001	0	0.001	0.001	0.013	0	0.008	303.329	0.714	-1.31279
07/22/2011	12	0.001	0.012	0.018	0	0.001	0	0.001	0.001	0.014	0	0.008	304.51	0.659	-1.207
07/22/2011	13	0.003	0.006	0.013	0	0	0	0.001	0	0.013	0	0.007	305.518	0.611	-1.08975
07/22/2011	14	0.006	0.004	0.009	0	0	0	0.001	0	0.01	0	0.006	305.778	0.6	-0.663261
07/22/2011	15	0.008	0.002	0.006	0	0	0	0.001	0	0.008	0	0.005	304.792	0.623	0.0508228
07/22/2011	16	0.011	0.001	0.004	0	0	0	0.001	0	0.006	0	0.004	303.945	0.677	0.619092
07/22/2011	17	0.013	0.001	0.004	0	0	0	0.001	0	0.006	0	0.004	303.023	0.715	0.819044
07/22/2011	18	0.014	0.001	0.003	0	0	0	0.001	0	0.005	0	0.004	302.315	0.765	0.907141
07/22/2011	19	0.012	0.001	0.003	0	0	0	0.001	0	0.004	0	0.003	301.12	0.826	1.0839
07/22/2011	20	0.012	0.001	0.002	0	0	0	0.001	0	0.003	0	0.003	299.927	0.881	1.21435
07/22/2011	21	0.015	0.002	0.002	0	0.001	0	0.002	0.001	0.001	0	0.003	299.264	0.9	1.8775
07/22/2011	22	0.016	0.002	0.001	0	0.001	0	0.002	0.001	0.001	0	0.003	298.833	0.908	2.07211
07/22/2011	23	0.017	0.002	0.001	0	0.001	0	0.003	0.001	0.001	0	0.003	298.498	0.918	2.53384
07/22/2011	24	0.017	0.002	0.001	0	0.001	0	0.003	0.001	0.001	0	0.004	298.167	0.937	2.18119
07/23/2011	1	0.016	0.002	0.001	0	0.002	0	0.003	0.001	0.002	0	0.004	297.777	0.961	2.54275
07/23/2011	2	0.009	0.001	0.001	0	0.002	0	0.003	0.001	0.005	0	0.005	297.546	0.965	2.24627
07/23/2011	3	0.006	0.001	0.001	0	0.001	0	0.002	0.001	0.007	0	0.006	297.573	0.951	1.51282
07/23/2011	4	0.003	0.002	0.002	0	0.001	0	0.001	0.001	0.008	0	0.006	297.41	0.963	1.12235
07/23/2011	5	0.002	0.003	0.003	0	0.001	0	0.001	0.001	0.008	0	0.006	297.205	0.974	0.936077
07/23/2011	6	0.001	0.003	0.004	0	0.001	0	0.001	0	0.006	0	0.007	297.139	0.975	0.693156
07/23/2011	7	0.001	0.003	0.005	0	0.001	0	0	0	0.005	0	0.007	297.868	0.952	0.23555
07/23/2011	8	0	0.007	0.013	0	0	0	0	0	0.004	0	0.009	298.941	0.92	-0.150424
07/23/2011	9	0	0.01	0.022	0	0	0	0	0	0.003	0	0.009	299.898	0.878	-0.33057
07/23/2011	10	0	0.006	0.019	0	0	0	0	0	0.004	0	0.009	299.936	0.855	-0.331972
07/23/2011	11	0	0.004	0.018	0	0	0	0	0	0.004	0	0.01	301.557	0.809	-0.447871
07/23/2011	12	0	0.002	0.017	0	0	0	0	0	0.004	0	0.009	301.822	0.777	-0.474681
07/23/2011	13	0	0.001	0.015	0	0	0	0	0	0.004	0	0.009	302.917	0.752	-0.514676
07/23/2011	14	0	0	0.013	0	0	0	0	0	0.003	0	0.007	302.307	0.749	-0.523625
07/23/2011	15	0	0	0.01	0	0	0	0	0	0.004	0	0.007	302.819	0.753	-0.44281
07/23/2011	16	0	0	0.009	0	0	0	0	0	0.003	0	0.006	301.788	0.779	-0.445943
07/23/2011	17	0	0	0.006	0	0	0	0	0	0.003	0	0.005	301.393	0.796	-0.355909
07/23/2011	18	0	0	0.004	0	0	0	0	0	0.003	0	0.004	300.595	0.828	-0.199367
07/23/2011	19	0.001	0	0.003	0	0	0	0	0	0.003	0	0.003	300.097	0.854	0.226459
07/23/2011	20	0.001	0	0.002	0	0	0	0	0	0.003	0	0.003	299.308	0.877	0.288987
07/23/2011	21	0.001	0	0.002	0	0	0	0	0	0.003	0	0.003	298.852	0.892	0.298842
07/23/2011	22	0.001	0	0.001	0	0	0	0	0	0.003	0	0.002	298.493	0.905	0.290965
07/23/2011	23	0.001	0	0.001	0	0	0	0	0	0.003	0	0.002	298.258	0.91	0.29074
07/23/2011	24	0.001	0	0.001	0	0	0	0	0	0.003	0	0.003	298.011	0.915	0.417841
07/24/2011	1	0.001	0	0.001	0	0	0	0	0	0.004	0	0.003	297.77	0.923	0.693299
07/24/2011	2	0.001	0	0.001	0	0	0	0	0	0.004	0	0.003	297.531	0.932	0.756256
07/24/2011	3	0.001	0	0.001	0	0.001	0	0	0	0.005	0	0.004	297.355	0.938	0.199162
07/24/2011	4	0.002	0	0.002	0	0.001	0	0	0	0.006	0	0.004	297.212	0.945	0.951301
07/24/2011	5	0.002	0.001	0.002	0	0.001	0	0	0	0.007	0	0.005	297.073	0.952	0.83385
07/24/2011	6	0.002	0.001	0.002	0	0.001	0	0.001	0	0.009	0	0.005	296.98	0.96	1.13268
07/24/2011	7	0.003	0.002	0.002	0	0.001	0	0.001	0	0.009	0	0.006	297.553	0.955	0.978499
07/24/2011	8	0.001	0.008	0.008	0	0.001	0	0	0	0.008	0	0.006	298.937	0.896	0.031121
07/24/2011	9	0.001	0.011	0.013	0	0.001	0	0	0	0.006	0	0.007	299.965	0.852	-0.0667735
07/24/2011	10	0	0.006	0.013	0	0	0	0	0	0.006	0	0.008	301.008	0.822	-0.213277
07/24/2011	11	0	0.002	0.01	0	0	0	0	0	0.006	0	0.008	301.837	0.784	-0.265254
07/24/2011	12	0.001	0.001	0.007	0	0	0	0	0	0.006	0	0.007	302.7	0.757	0.0355762
07/24/2011	13	0.001	0	0.005	0	0	0	0	0	0.006	0	0.006	303.307	0.734	0.188464
07/24/2011	14	0.001	0	0.004	0	0	0	0	0	0.005	0	0.006	303.364	0.734	0.0529681
07/24/2011	15	0.001	0	0.003	0	0	0	0	0	0.005	0	0.006	303.088	0.739	0.0454186
07/24/2011	16	0	0	0.003	0	0	0	0	0	0.005	0	0.006	303.014	0.732	-0.218698
07/24/2011	17	0	0	0.003	0	0	0	0	0	0.005	0	0.005	302.569	0.729	0.0415594
07/24/2011	18	0.001	0	0.002	0	0	0	0	0	0.005	0	0.005	301.936	0.756	0.149997
07/24/2011	19	0.002	0	0.001	0	0	0	0	0	0.007	0	0.005	301.431	0.768	0.346019
07/24/2011	20	0.001	0	0.001	0	0	0	0	0	0.008	0	0.004	300.305	0.775	-0.0265922
07/24/2011	21	0.002	0	0.001	0	0	0	0	0	0.008	0	0.004	299.259	0.831	0.281623
07/24/2011	22	0.001	0	0.001	0	0	0	0	0	0.007	0	0.004	298.663	0.866	0.249477
07/24/2011	23	0.002	0	0.001	0	0	0	0	0	0.007	0	0.004	298.353	0.883	0.377039
07/24/2011	24	0.004	0	0.001	0	0	0	0	0	0.008	0	0.004	298.15	0.885	0.781164
07/25/2011	1	0.005	0	0.001	0	0	0	0	0	0.008	0	0.004	297.754	0.92	1.06434
07/25/2011	2	0.006	0	0.001	0	0.001	0	0	0	0.008	0	0.005	297.469	0.941	1.28412
07/25/2011	3	0.007	0	0.001	0	0.001	0	0	0	0.008	0	0.005	297.251	0.956	1.56751
07/25/2011	4	0.008	0	0.001	0	0.001	0	0	0	0.009	0	0.006	297.097	0.962	1.57162
07/25/2011	5	0.009	0.001	0.001	0.001	0.002	0	0.001	0.001	0.01	0	0.007	297.006	0.961	2.25032
07/25/2011	6	0.011	0.001	0.001	0.001	0.002	0	0.001	0.001	0.01	0	0.007	296.947	0.958	2.24378
07/25/2011	7	0.013	0.001	0.001	0.001	0.003	0	0.001	0.001	0.011	0	0.009	297.642	0.932	2.18461
07/25/2011	8	0.012	0.003	0.003	0.001	0.003	0	0.001	0.002	0.012	0	0.01	298.993	0.894	1.89329
07/25/2011	9	0.005	0.008	0.009	0	0.001	0	0.001	0.001	0.014	0	0.009	299.78	0.871	0.06052
07/25/2011	10	0.002	0.003	0.008	0	0	0	0	0.001	0.013	0	0.01	300.192	0.858	-0.0855232
07/25/2011	11	0.001	0.001	0.008	0	0	0	0	0	0.01	0	0.009	301.449	0.824	0.175497
07/25/2011	12	0.001	0.001	0.008	0	0	0	0	0	0.009	0	0.008	302.05	0.775	0.161024
07/25/2011	13	0.001	0.001	0.008	0	0	0	0	0	0.009	0	0.008	302.705	0.744	0.161823
07/25/2011	14	0.001	0.001	0.007	0	0	0	0	0	0.009	0	0.008	303.547	0.726	0.184847
07/25/2011	15	0.001	0.001	0.007	0	0	0	0	0	0.009	0	0.007	303.156	0.717	0.073602
07/25/2011	16	0.001	0.001	0.006	0	0	0	0	0	0.009	0	0.008	303.568	0.721	0.185189
07/25/2011	17	0.001	0.002	0.006	0	0	0	0	0	0.008	0	0.007	303.189	0.727	0.161156
07/25/2011	18	0.001	0.002	0.004	0	0	0	0	0	0.009	0	0.008	302.858	0.73	0.164766
07/25/2011	19	0.001	0.002	0.004	0	0	0	0	0	0.01	0	0.009	302.153	0.743	0.152476
07/25/2011	20	0.002	0.002	0.002	0	0	0	0	0	0.012	0	0.01	300.912	0.783	0.109787
07/25/2011	21	0.002	0.001	0.001	0.001	0	0	0	0	0.014	0	0.009	300	0.809	-0.205668
07/25/2011	22	0.003	0.001	0.001	0.001	0	0	0	0	0.013	0	0.008	299.352	0.829	0.167357
07/25/2011	23	0.002	0.001	0.001	0.001	0	0	0	0	0.013	0	0.008	298.828	0.848	-0.0948366
07/25/2011	24	0.002	0.001	0.001	0.001	0	0	0	0	0.014	0	0.007	298.278	0.876	0.584299
07/26/2011	1	0.004	0.001	0.001	0	0	0	0	0	0.013	0	0.007	297.804	0.901	0.799104
07/26/2011	2	0.006	0.001	0.001	0	0	0	0	0	0.013	0	0.007	297.546	0.905	1.02943
07/26/2011	3	0.006	0.001	0.001	0	0	0	0.001	0	0.012	0	0.007	297.296	0.923	1.07609
07/26/2011	4	0.004	0.001	0.001	0	0	0	0	0	0.011	0	0.006	297.174	0.932	1.01417
07/26/2011	5	0.002	0	0.001	0	0	0	0	0	0.011	0	0.006	297.13	0.934	0.795258
07/26/2011	6	0.001	0	0.001	0	0	0	0	0	0.009	0	0.005	297.125	0.937	0.744243
07/26/2011	7	0.001	0	0.001	0	0	0	0	0	0.009	0	0.005	297.784	0.936	0.732104
07/26/2011	8	0.002	0	0.001	0	0	0	0	0.001	0.009	0	0.007	299.267	0.89	-0.0473141
07/26/2011	9	0.002	0	0.002	0	0.001	0	0	0.001	0.009	0	0.007	300.413	0.865	-0.120125
07/26/2011	10	0.002	0.002	0.004	0	0	0	0	0.001	0.007	0	0.005	301.407	0.838	-0.407974
07/26/2011	11	0.002	0.001	0.005	0	0	0	0	0	0.006	0	0.004	302.171	0.795	-0.030339
07/26/2011	12	0.001	0.001	0.006	0	0	0	0	0	0.005	0	0.005	303.584	0.752	0.192068
07/26/2011	13	0.001	0.001	0.007	0	0	0	0	0	0.005	0	0.006	304.593	0.7	0.0859233
07/26/2011	14	0	0.001	0.008	0	0	0	0	0	0.006	0	0.007	304.495	0.678	-0.214712
07/26/2011	15	0	0.001	0.009	0	0	0	0	0	0.006	0	0.008	304.668	0.67	-0.378351
07/26/2011	16	0	0.001	0.009	0	0	0	0	0	0.007	0	0.008	304.898	0.67	-0.186883
07/26/2011	17	0.001	0.001	0.009	0	0	0	0	0	0.008	0	0.009	304.839	0.664	0.120352
07/26/2011	18	0.001	0.001	0.007	0	0	0	0	0	0.009	0	0.009	304.416	0.662	0.273186
07/26/2011	19	0.001	0	0.006	0	0	0	0	0	0.009	0	0.008	303.742	0.651	0.210352
07/26/2011	20	0.002	0	0.003	0	0	0	0	0	0.01	0	0.007	300.912	0.783	0.233576
07/26/2011	21	0.002	0	0.002	0	0	0	0	0	0.011	0	0.007	300	0.809	0.564941
07/26/2011	22	0.001	0	0.001	0.001	0	0	0	0	0.012	0	0.007	299.352	0.829	-0.193286
07/26/2011	23	0.002	0	0.001	0.001	0	0	0	0	0.012	0	0.006	298.828	0.848	0.433021
07/26/2011	24	0.001	0	0.001	0.001	0	0	0	0	0.012	0	0.007	298.278	0.876	-0.0319146
07/27/2011	1	0.001	0.001	0.001	0	0	0	0	0	0.012	0	0.007	297.804	0.901	0.905284
07/27/2011	2	0.001	0.001	0.001	0	0	0	0.001	0	0.014	0	0.008	297.546	0.905	0.973391
07/27/2011	3	0.002	0.001	0.001	0	0	0	0.001	0	0.012	0	0.007	297.296	0.923	0.976351
07/27/2011	4	0.002	0.001	0.002	0	0	0	0.001	0	0.011	0	0.008	297.174	0.932	0.241265
07/27/2011	5	0.002	0.001	0.002	0	0	0	0.001	0	0.011	0	0.008	297.13	0.934	0.242067
07/27/2011	6	0.002	0	0.002	0	0	0	0	0	0.01	0	0.008	297.125	0.937	0.644793
07/27/2011	7	0.002	0	0.001	0	0	0	0	0	0.009	0	0.007	297.784	0.936	0.72414
07/27/2011	8	0.001	0	0.001	0	0.001	0	0	0	0.01	0	0.008	299.267	0.89	0.0232434
07/27/2011	9	0.002	0.001	0.002	0	0.001	0	0	0.001	0.009	0	0.007	300.413	0.865	-0.120125
07/27/2011	10	0.002	0.002	0.004	0	0	0	0	0	0.007	0	0.005	301.407	0.838	0.566584
07/27/2011	11	0.002	0.002	0.005	0	0	0	0	0	0.007	0	0.005	302.171	0.795	0.449665
07/27/2011	12	0.001	0.001	0.006	0	0	0	0	0	0.008	0	0.006	303.584	0.752	0.117655
07/27/2011	13	0.001	0.001	0.007	0	0	0	0	0	0.009	0	0.007	304.593	0.7	0.10088
07/27/2011	14	0.001	0.001	0.008	0	0	0	0	0	0.01	0	0.008	304.495	0.678	0.119439
07/27/2011	15	0.001	0.001	0.009	0	0	0	0	0	0.012	0	0.009	304.668	0.67	0.0532814
07/27/2011	16	0.002	0.001	0.009	0	0	0	0	0	0.014	0	0.01	304.898	0.67	0.000591612
07/27/2011	17	0.002	0.001	0.009	0	0	0	0	0	0.015	0	0.011	304.839	0.664	-0.0213261
07/27/2011	18	0.002	0.001	0.007	0	0	0	0	0	0.016	0	0.012	304.416	0.662	-0.0225976
07/27/2011	19	0.003	0	0.006	0	0	0	0	0	0.016	0	0.011	303.742	0.651	-0.0101343
07/27/2011	20	0.003	0	0.003	0	0	0	0	0.001	0.014	0	0.009	300.729	0.877	0.234966
07/27/2011	21	0.002	0	0.002	0	0	0	0	0.001	0.012	0	0.009	299.859	0.907	0.0740055
07/27/2011	22	0.002	0	0.002	0	0	0	0	0	0.011	0	0.01	299.776	0.871	0.255944
07/27/2011	23	0.002	0.001	0.002	0	0.001	0	0.001	0	0.013	0	0.01	299.31	0.9	0.105129
07/27/2011	24	0.003	0.001	0.002	0	0.001	0	0.001	0	0.016	0	0.011	298.747	0.945	0.438109
07/28/2011	1	0.002	0.001	0.001	0	0.001	0	0.001	0	0.018	0	0.011	298.377	0.965	1.70883
07/28/2011	2	0.002	0.002	0.001	0	0.001	0	0.001	0	0.017	0	0.01	298.135	0.967	1.66421
07/28/2011	3	0.002	0.001	0.002	0	0.001	0	0.001	0	0.012	0	0.008	297.932	0.968	0.61738
07/28/2011	4	0.002	0.001	0.002	0	0.001	0	0	0	0.009	0	0.007	297.77	0.972	0.58094
07/28/2011	5	0.002	0.001	0.002	0	0.001	0	0	0	0.008	0	0.007	297.693	0.968	0.564461
07/28/2011	6	0.002	0.001	0.002	0	0.001	0	0	0	0.009	0	0.006	297.619	0.967	0.580742
07/28/2011	7	0.002	0.001	0.002	0	0.001	0	0	0	0.011	0	0.007	298.323	0.931	0.213341
07/28/2011	8	0.002	0.001	0.003	0	0.001	0	0	0	0.01	0	0.006	299.412	0.889	0.500382
07/28/2011	9	0.001	0.001	0.005	0	0	0	0	0	0.007	0	0.005	299.792	0.851	0.332364
07/28/2011	10	0.001	0	0.005	0	0	0	0	0	0.007	0	0.005	301.137	0.809	0.233314
07/28/2011	11	0.002	0	0.005	0	0	0	0	0	0.007	0	0.005	300.833	0.808	0.450121
07/28/2011	12	0.001	0	0.004	0	0	0	0	0	0.007	0	0.004	302.844	0.752	-0.159499
07/28/2011	13	0.002	0	0.005	0	0	0	0	0	0.006	0	0.004	301.648	0.771	-0.102778
07/28/2011	14	0.002	0	0.004	0	0	0	0	0	0.007	0	0.004	303.282	0.746	-0.163794
07/28/2011	15	0.002	0	0.005	0	0	0	0	0	0.007	0	0.004	301.172	0.802	0.0108905
07/28/2011	16	0.003	0	0.004	0	0	0	0	0	0.007	0	0.004	301.453	0.815	0.19181
07/28/2011	17	0.002	0	0.004	0	0	0	0	0	0.007	0	0.004	300.444	0.82	0.0881323
07/28/2011	18	0.001	0	0.005	0	0	0	0	0	0.007	0	0.004	300.105	0.837	0.113373
07/28/2011	19	0.001	0	0.005	0	0	0	0	0	0.005	0	0.004	299.091	0.861	0.287102
07/28/2011	20	0.001	0	0.006	0	0	0	0	0	0.004	0	0.004	298.363	0.889	0.25449
07/28/2011	21	0.001	0	0.005	0	0	0	0	0	0.004	0	0.005	297.871	0.914	0.147302
07/28/2011	22	0	0	0.004	0	0	0	0	0	0.003	0	0.005	297.624	0.929	-0.0271385
07/28/2011	23	0	0	0.005	0	0	0	0	0	0.002	0	0.005	297.456	0.941	-0.0697006
07/28/2011	24	0	0	0.005	0	0	0	0	0	0.002	0	0.005	297.296	0.953	-0.00305336
07/29/2011	1	0	0	0.004	0	0	0	0	0	0.002	0	0.004	297.124	0.969	0.238161
07/29/2011	2	0	0	0.004	0	0	0	0	0	0.002	0	0.004	297.129	0.968	0.238175
07/29/2011	3	0	0	0.004	0	0	0	0	0	0.002	0	0.004	297.234	0.967	0.23847
07/29/2011	4	0	0.001	0.004	0	0	0	0	0	0.002	0	0.004	297.163	0.972	0.238271
07/29/2011	5	0.001	0.001	0.004	0	0.001	0	0	0	0.004	0	0.006	297.079	0.978	0.580682
07/29/2011	6	0.001	0.001	0.003	0	0.001	0	0.001	0	0.006	0	0.007	297.064	0.979	0.696227
07/29/2011	7	0.001	0.001	0.003	0	0.001	0	0.001	0	0.009	0	0.008	297.687	0.972	0.582763
07/29/2011	8	0.002	0.002	0.005	0	0.001	0	0.001	0	0.011	0	0.009	299.295	0.903	0.0894095
07/29/2011	9	0.001	0.004	0.007	0	0.001	0	0.001	0	0.007	0	0.009	301.01	0.819	-0.0438626
07/29/2011	10	0	0.006	0.006	0	0	0	0	0	0.004	0	0.006	302.38	0.758	-0.361793
07/29/2011	11	0	0.004	0.005	0	0	0	0	0	0.003	0	0.004	303.561	0.71	-0.338988
07/29/2011	12	0	0.001	0.004	0	0	0	0	0	0.002	0	0.003	304.075	0.68	-0.453543
07/29/2011	13	0	0	0.003	0	0	0	0	0	0.002	0	0.003	305.028	0.641	-0.495538
07/29/2011	14	0.001	0	0.002	0	0	0	0	0	0.002	0	0.002	305.523	0.62	-0.0315356
07/29/2011	15	0.001	0	0.001	0	0	0	0	0	0.003	0	0.002	305.498	0.619	-0.572858
07/29/2011	16	0.002	0	0.001	0	0	0	0	0	0.003	0	0.002	305.262	0.63	-0.565832
07/29/2011	17	0.002	0	0.001	0	0	0	0	0	0.003	0	0.002	305.038	0.637	-0.543852
07/29/2011	18	0.002	0	0.001	0	0	0	0	0	0.003	0	0.001	304.665	0.636	-0.301697
07/29/2011	19	0.003	0	0.001	0	0	0	0	0	0.003	0	0.001	303.503	0.645	-0.128373
07/29/2011	20	0.004	0	0	0	0	0	0	0	0.003	0	0.002	302.126	0.71	0.0447569
07/29/2011	21	0.002	0	0.001	0	0	0	0	0	0.003	0	0.002	301.293	0.738	-0.259411
07/29/2011	22	0.001	0	0.001	0	0	0	0	0	0.004	0	0.002	300.608	0.77	-0.171718
07/29/2011	23	0.001	0	0.001	0	0	0	0	0	0.005	0	0.002	299.927	0.81	0.128507
07/29/2011	24	0.001	0	0.001	0	0	0	0	0	0.005	0	0.003	299.273	0.853	0.0925056
07/30/2011	1	0.001	0.001	0.001	0	0	0	0	0	0.007	0	0.004	298.654	0.905	0.453371
07/30/2011	2	0.002	0.001	0.001	0	0	0	0	0	0.011	0	0.006	298.232	0.932	0.768965
07/30/2011	3	0.003	0.002	0.001	0	0.001	0	0	0	0.012	0	0.007	298.009	0.937	1.01157
07/30/2011	4	0.004	0.002	0.001	0	0.001	0	0	0	0.012	0	0.007	297.87	0.93	1.02942
07/30/2011	5	0.005	0.002	0.001	0.001	0.001	0	0.001	0.001	0.011	0	0.007	297.711	0.934	2.19313
07/30/2011	6	0.007	0.002	0.001	0.001	0.001	0	0.001	0.001	0.01	0	0.007	297.61	0.938	2.21924
07/30/2011	7	0.008	0.002	0.001	0.001	0.001	0	0.001	0.001	0.01	0	0.007	298.188	0.922	2.1776
07/30/2011	8	0.01	0.002	0.002	0.001	0.001	0	0.001	0.001	0.009	0	0.006	299.766	0.89	2.05462
07/30/2011	9	0.012	0.005	0.003	0.001	0.001	0	0.001	0.001	0.009	0	0.006	301.216	0.834	1.92446
07/30/2011	10	0.008	0.022	0.007	0	0	0	0	0.001	0.01	0	0.006	302.597	0.765	0.288233
07/30/2011	11	0.002	0.031	0.006	0	0	0	0	0	0.009	0	0.005	303.949	0.695	-0.24353
07/30/2011	12	0.002	0.024	0.005	0	0	0	0	0	0.006	0	0.004	304.821	0.656	-0.352587
07/30/2011	13	0.002	0.016	0.004	0	0	0	0	0	0.005	0	0.004	305.487	0.623	0.0148066
07/30/2011	14	0.002	0.013	0.004	0	0	0	0	0	0.005	0	0.004	306.148	0.606	0.0185542
07/30/2011	15	0.002	0.01	0.004	0	0	0	0	0	0.005	0	0.004	306.229	0.602	-7.13359e-05
07/30/2011	16	0.002	0.007	0.003	0	0	0	0	0	0.005	0	0.004	306.24	0.6	0.000461067
07/30/2011	17	0.001	0.005	0.003	0	0	0	0	0	0.006	0	0.004	305.907	0.603	-0.0130587
07/30/2011	18	0.002	0.004	0.002	0	0	0	0	0	0.007	0	0.004	305.358	0.606	-0.480742
07/30/2011	19	0.006	0.002	0.002	0	0	0	0	0	0.007	0	0.004	304.652	0.615	-0.0720807
07/30/2011	20	0.007	0.001	0.001	0	0	0	0	0	0.006	0	0.004	302.934	0.666	0.0684222
07/30/2011	21	0.011	0.001	0.002	0	0	0	0	0.001	0.005	0	0.003	302.024	0.681	0.798365
07/30/2011	22	0.018	0.001	0.002	0	0	0	0.001	0.001	0.005	0	0.004	301.222	0.709	1.1115
07/30/2011	23	0.025	0.002	0.003	0	0.001	0	0.001	0.001	0.004	0	0.004	300.521	0.748	1.45963
07/30/2011	24	0.031	0.002	0.003	0	0.001	0	0.001	0.001	0.004	0	0.004	299.887	0.793	1.64967
2011-02-08	1	0.002	0.003	0.005	0	0.001	0	0.001	0	0.021	0	0.013	299.51	0.849	-0.0121338
2011-02-08	2	0.002	0.003	0.005	0.001	0.001	0	0.001	0	0.022	0	0.013	299.029	0.884	1.80126
2011-02-08	3	0.003	0.003	0.004	0.001	0.001	0	0.001	0.001	0.022	0	0.013	298.68	0.902	1.86237
2011-02-08	4	0.004	0.002	0.004	0.001	0.001	0	0.001	0.001	0.022	0	0.013	298.376	0.912	1.89138
2011-02-08	5	0.006	0.002	0.003	0.001	0.001	0	0.002	0.001	0.021	0	0.013	298.099	0.921	1.99379
2011-02-08	6	0.007	0.002	0.003	0.001	0.001	0	0.002	0.001	0.021	0	0.013	297.865	0.929	2.01621
2011-02-08	7	0.01	0.003	0.003	0.001	0.002	0	0.002	0.001	0.02	0	0.013	298.237	0.937	2.05501
2011-02-08	8	0.01	0.003	0.005	0.001	0.002	0	0.002	0.001	0.019	0	0.012	300.209	0.888	1.89338
2011-02-08	9	0.008	0.009	0.006	0	0.002	0	0.002	0.001	0.016	0	0.011	301.818	0.83	0.593356
2011-02-08	10	0.005	0.016	0.009	0	0.002	0	0.001	0.001	0.015	0	0.01	303.45	0.761	-0.231288
2011-02-08	11	0.002	0.015	0.011	0	0.001	0	0.001	0	0.014	0	0.009	305.134	0.687	-0.943298
2011-02-08	12	0.002	0.013	0.013	0	0.001	0	0.001	0	0.011	0	0.009	306.476	0.633	-0.530306
2011-02-08	13	0.001	0.015	0.014	0	0.001	0	0.001	0	0.01	0	0.009	307.849	0.58	-0.426456
2011-02-08	14	0.001	0.017	0.014	0	0.001	0	0	0	0.01	0	0.009	308.749	0.543	-0.370364
2011-02-08	15	0.001	0.02	0.015	0	0.001	0	0	0	0.011	0	0.009	309.024	0.525	-0.510436
2011-02-08	16	0.001	0.021	0.016	0	0.001	0	0	0	0.012	0	0.01	308.665	0.532	-0.436245
2011-02-08	17	0.001	0.018	0.014	0	0	0	0	0.001	0.013	0	0.01	308.19	0.541	-0.628658
2011-02-08	18	0.001	0.018	0.014	0	0	0	0.001	0.001	0.014	0	0.012	307.871	0.545	-0.446383
2011-02-08	19	0.001	0.013	0.013	0	0	0	0.001	0.001	0.014	0	0.014	306.693	0.557	-0.130292
2011-02-08	20	0.001	0.003	0.01	0	0	0	0.001	0.001	0.013	0	0.014	304.777	0.612	-0.0330801
2011-02-08	21	0.001	0.001	0.007	0	0	0	0.001	0	0.013	0	0.011	303.458	0.668	-0.235946
2011-02-08	22	0.002	0	0.004	0	0	0	0	0	0.011	0	0.008	302.445	0.72	0.0351658
2011-02-08	23	0.002	0	0.003	0	0	0	0	0	0.009	0	0.006	301.521	0.777	0.444308
2011-02-08	24	0.002	0	0.002	0	0	0	0	0	0.009	0	0.005	300.805	0.834	0.154838
2011-03-08	1	0.003	0	0.001	0	0	0	0	0	0.006	0	0.003	300.2	0.891	0.601675
2011-03-08	2	0.002	0	0.001	0	0	0	0	0	0.005	0	0.003	299.835	0.912	0.462309
2011-03-08	3	0.002	0	0.001	0	0	0	0	0	0.004	0	0.002	299.562	0.926	0.724367
2011-03-08	4	0.002	0	0.001	0	0	0	0	0	0.003	0	0.002	299.29	0.948	0.747693
2011-03-08	5	0.003	0	0	0	0	0	0	0	0.003	0	0.002	299.175	0.941	0.581019
2011-03-08	6	0.003	0	0	0	0	0	0	0	0.003	0	0.002	298.975	0.927	0.548034
2011-03-08	7	0.004	0	0.001	0	0	0	0	0	0.003	0	0.002	299.313	0.913	0.722316
2011-03-08	8	0.003	0	0.001	0	0	0	0	0	0.004	0	0.003	300.887	0.881	0.266481
2011-03-08	9	0.001	0	0.002	0	0	0	0	0	0.007	0	0.004	302.589	0.834	0.0535795
2011-03-08	10	0.002	0.001	0.003	0	0	0	0	0	0.01	0	0.005	304.381	0.759	-0.0149683
2011-03-08	11	0.003	0.004	0.004	0	0.001	0	0	0	0.011	0	0.007	306.435	0.651	-0.284315
2011-03-08	12	0.004	0.009	0.005	0	0	0	0	0	0.012	0	0.007	307.588	0.594	-0.360742
2011-03-08	13	0.005	0.009	0.006	0	0	0	0	0	0.012	0	0.007	308.644	0.558	-0.357723
2011-03-08	14	0.005	0.01	0.006	0	0	0	0	0	0.012	0	0.007	309.182	0.54	-0.400659
2011-03-08	15	0.006	0.009	0.005	0	0	0	0	0	0.012	0	0.007	308.986	0.538	-0.330397
2011-03-08	16	0.006	0.007	0.004	0	0	0	0	0	0.012	0	0.007	308.668	0.536	-0.323838
2011-03-08	17	0.007	0.008	0.004	0	0	0	0	0	0.011	0	0.006	307.926	0.54	-0.199725
2011-03-08	18	0.008	0.008	0.003	0.001	0.001	0	0.001	0	0.011	0	0.006	306.856	0.571	1.92157
2011-03-08	19	0.009	0.005	0.002	0.001	0.001	0	0.001	0	0.011	0	0.006	305.441	0.664	1.99677
2011-03-08	20	0.01	0.003	0.002	0.001	0.001	0	0.001	0	0.01	0	0.006	303.787	0.683	1.93323
2011-03-08	21	0.006	0.002	0.001	0.001	0.001	0	0.001	0	0.009	0	0.005	303.133	0.686	2.05144
2011-03-08	22	0.003	0.001	0.001	0.001	0.001	0	0.001	0	0.008	0	0.005	302.415	0.718	2.04656
2011-03-08	23	0.002	0.001	0.001	0.001	0.001	0	0.001	0	0.007	0	0.005	301.912	0.752	2.05492
2011-03-08	24	0.002	0	0	0.001	0.001	0	0.001	0	0.007	0	0.005	301.385	0.793	2.3946
2011-04-08	1	0.002	0.001	0	0.001	0.002	0	0.001	0	0.006	0	0.005	300.819	0.838	2.41928
2011-04-08	2	0.002	0.001	0.001	0.001	0.002	0	0.001	0	0.006	0	0.005	300.28	0.87	2.14913
2011-04-08	3	0.003	0.002	0.001	0.001	0.003	0	0.001	0	0.006	0	0.005	299.98	0.87	2.13306
2011-04-08	4	0.004	0.003	0.001	0.001	0.004	0	0.001	0	0.006	0	0.006	299.643	0.863	2.09277
2011-04-08	5	0.004	0.004	0.001	0.001	0.005	0	0.001	0.001	0.006	0	0.006	299.436	0.861	2.08617
2011-04-08	6	0.004	0.006	0.001	0.001	0.005	0	0.001	0.001	0.007	0	0.008	299.161	0.854	2.04987
2011-04-08	7	0.005	0.008	0.002	0.001	0.006	0	0.001	0.001	0.009	0	0.009	299.262	0.847	1.92596
2011-04-08	8	0.004	0.016	0.005	0.001	0.005	0	0.001	0.001	0.011	0	0.01	300.59	0.809	1.73115
2011-04-08	9	0.003	0.034	0.013	0.001	0.004	0	0.001	0.001	0.014	0	0.011	301.925	0.773	1.52992
2011-04-08	10	0.003	0.033	0.015	0	0.002	0	0.001	0.001	0.012	0	0.008	303.17	0.738	-0.870618
2011-04-08	11	0.006	0.025	0.012	0	0.001	0	0	0.001	0.011	0	0.007	304.426	0.702	-0.645833
2011-04-08	12	0.008	0.017	0.01	0	0.001	0	0	0.001	0.01	0	0.006	305.412	0.676	-0.0859532
2011-04-08	13	0.008	0.013	0.01	0	0.001	0	0	0.001	0.01	0	0.006	306.128	0.655	-0.119282
2011-04-08	14	0.009	0.011	0.01	0	0.001	0	0	0.001	0.009	0	0.006	306.103	0.656	-0.119069
2011-04-08	15	0.01	0.011	0.012	0	0.001	0	0.001	0.001	0.009	0	0.006	305.629	0.666	-0.0108651
2011-04-08	16	0.011	0.014	0.016	0	0.001	0	0.001	0.002	0.009	0	0.007	304.953	0.681	-0.377398
2011-04-08	17	0.011	0.019	0.018	0	0.001	0	0.001	0.002	0.009	0	0.008	303.997	0.7	-0.684556
2011-04-08	18	0.01	0.028	0.018	0	0.001	0	0.001	0.003	0.009	0	0.009	302.844	0.723	-0.734791
2011-04-08	19	0.009	0.045	0.017	0	0.001	0	0.001	0.003	0.01	0	0.01	301.567	0.751	-0.728416
2011-04-08	20	0.007	0.06	0.014	0.001	0.002	0.001	0.002	0.004	0.011	0	0.012	300.67	0.766	1.62098
2011-04-08	21	0.006	0.069	0.01	0.001	0.002	0.001	0.002	0.005	0.012	0	0.013	300.1	0.782	1.67668
2011-04-08	22	0.007	0.071	0.01	0.001	0.002	0.001	0.002	0.006	0.011	0.001	0.014	299.657	0.807	1.66736
2011-04-08	23	0.009	0.067	0.009	0.001	0.002	0.001	0.003	0.007	0.009	0.001	0.014	299.449	0.823	1.76022
2011-04-08	24	0.011	0.064	0.009	0.001	0.003	0.001	0.003	0.008	0.006	0.001	0.015	299.257	0.839	1.7658
2011-05-08	1	0.011	0.063	0.009	0.001	0.003	0.001	0.004	0.009	0.005	0.001	0.015	299.07	0.853	1.8798
2011-05-08	2	0.007	0.065	0.008	0.001	0.003	0.002	0.004	0.009	0.008	0.001	0.016	298.858	0.867	2.03316
2011-05-08	3	0.004	0.073	0.007	0.001	0.003	0.002	0.004	0.009	0.012	0.001	0.017	298.655	0.877	0.318577
2011-05-08	4	0.006	0.096	0.009	0.001	0.004	0.002	0.004	0.009	0.013	0.001	0.018	298.452	0.886	1.88262
2011-05-08	5	0.006	0.109	0.008	0.001	0.004	0.002	0.004	0.01	0.016	0.001	0.02	298.248	0.894	1.82321
2011-05-08	6	0.008	0.121	0.008	0.001	0.004	0.002	0.004	0.01	0.016	0.001	0.021	298.058	0.901	1.8211
2011-05-08	7	0.013	0.126	0.007	0.001	0.004	0.002	0.005	0.01	0.013	0.001	0.022	298.359	0.908	1.87229
2011-05-08	8	0.009	0.148	0.01	0	0.004	0.002	0.005	0.01	0.02	0.001	0.024	299.828	0.857	1.0659
2011-05-08	9	0.01	0.248	0.03	0	0.004	0.001	0.003	0.007	0.031	0.001	0.026	301.269	0.799	-0.451363
2011-05-08	10	0.012	0.227	0.035	0	0.003	0.001	0.002	0.005	0.033	0.001	0.024	302.866	0.729	-0.671826
2011-05-08	11	0.009	0.188	0.036	0	0.002	0.001	0.002	0.004	0.033	0	0.022	304.108	0.684	-0.854252
2011-05-08	12	0.006	0.148	0.032	0	0.001	0	0.001	0.003	0.03	0	0.019	305.296	0.641	-1.10493
2011-05-08	13	0.004	0.11	0.027	0	0.001	0	0.001	0.002	0.027	0	0.017	306.382	0.603	-1.18968
2011-05-08	14	0.004	0.094	0.024	0	0.001	0	0.001	0.002	0.026	0	0.016	306.868	0.583	-1.14216
2011-05-08	15	0.004	0.077	0.021	0	0.001	0	0.001	0.002	0.025	0	0.015	306.657	0.58	-1.04702
2011-05-08	16	0.004	0.06	0.019	0	0.001	0	0.001	0.002	0.023	0	0.015	306.036	0.591	-1.06642
2011-05-08	17	0.005	0.049	0.017	0	0.001	0	0.001	0.002	0.022	0	0.014	305.036	0.611	-0.896067
2011-05-08	18	0.005	0.043	0.013	0	0.001	0	0.001	0.002	0.022	0	0.014	303.78	0.638	-0.653286
2011-05-08	19	0.005	0.04	0.011	0.001	0.001	0	0.001	0.003	0.021	0	0.015	302.379	0.684	1.48466
2011-05-08	20	0.006	0.039	0.008	0.001	0.001	0.001	0.001	0.003	0.021	0	0.015	301.387	0.689	1.60467
2011-05-08	21	0.005	0.045	0.008	0.001	0.001	0.001	0.002	0.004	0.021	0	0.017	300.648	0.71	-0.149789
2011-05-08	22	0.004	0.046	0.007	0.001	0.001	0.001	0.002	0.005	0.023	0	0.018	299.971	0.738	1.63571
2011-05-08	23	0.004	0.042	0.007	0.001	0.001	0.001	0.003	0.006	0.023	0	0.019	299.527	0.756	1.6644
2011-05-08	24	0.007	0.041	0.007	0.001	0.001	0.001	0.003	0.006	0.022	0.001	0.02	299.065	0.78	0.031666
2011-06-08	1	0.009	0.042	0.007	0.001	0.002	0.001	0.004	0.007	0.019	0.001	0.02	298.582	0.81	1.65486
2011-06-08	2	0.008	0.041	0.006	0.001	0.002	0.001	0.004	0.008	0.019	0.001	0.02	298.222	0.83	1.72064
2011-06-08	3	0.006	0.039	0.006	0.001	0.002	0.002	0.004	0.009	0.02	0.001	0.02	298.018	0.84	1.80814
2011-06-08	4	0.006	0.037	0.005	0.001	0.002	0.002	0.004	0.009	0.018	0.001	0.021	297.911	0.844	0.221532
2011-06-08	5	0.01	0.035	0.004	0.001	0.002	0.002	0.005	0.01	0.015	0.001	0.021	297.87	0.845	1.90652
2011-06-08	6	0.013	0.034	0.004	0.001	0.003	0.002	0.005	0.01	0.012	0.001	0.021	297.87	0.846	1.90289
2011-06-08	7	0.014	0.031	0.004	0.001	0.003	0.002	0.005	0.01	0.011	0.001	0.021	298.301	0.858	1.92217
2011-06-08	8	0.012	0.027	0.004	0.001	0.003	0.002	0.005	0.01	0.012	0.001	0.021	300.442	0.805	1.98067
2011-06-08	9	0.01	0.056	0.026	0	0.003	0.001	0.003	0.006	0.019	0.001	0.02	302.128	0.743	-0.723954
2011-06-08	10	0.006	0.08	0.039	0	0.002	0.001	0.002	0.004	0.024	0.001	0.018	303.925	0.68	-1.15776
2011-06-08	11	0.003	0.082	0.039	0	0.002	0.001	0.002	0.003	0.023	0	0.019	305.522	0.626	-0.417592
2011-06-08	12	0.002	0.048	0.032	0	0.001	0	0.001	0.002	0.022	0	0.02	306.442	0.596	-0.313187
2011-06-08	13	0.001	0.01	0.021	0	0.001	0	0.001	0.002	0.017	0	0.019	306.467	0.581	-0.0263989
2011-06-08	14	0.001	0.001	0.011	0	0	0	0.001	0.001	0.015	0	0.015	306.563	0.588	-0.103306
2011-06-08	15	0.001	0	0.007	0	0	0	0	0.001	0.012	0	0.012	306.039	0.613	-0.137499
2011-06-08	16	0.001	0	0.005	0	0	0	0	0.001	0.01	0	0.009	305.683	0.635	-0.372035
2011-06-08	17	0.001	0	0.004	0	0	0	0	0.001	0.008	0	0.007	305.036	0.668	-0.498057
2011-06-08	18	0.001	0	0.002	0	0	0	0	0	0.007	0	0.005	304.007	0.717	0.0807955
2011-06-08	19	0.002	0	0.002	0	0	0	0	0	0.007	0	0.005	302.576	0.77	0.373913
2011-06-08	20	0.002	0	0.002	0	0	0	0	0	0.007	0	0.004	301.158	0.852	0.180076
2011-06-08	21	0.003	0	0.002	0	0	0	0	0.001	0.009	0	0.005	300.372	0.886	0.580531
2011-06-08	22	0.003	0	0.003	0	0	0	0.001	0.001	0.012	0	0.007	299.908	0.889	0.57947
2011-06-08	23	0.004	0.001	0.003	0.001	0	0	0.001	0.002	0.014	0	0.009	299.548	0.893	1.96247
2011-06-08	24	0.004	0.001	0.003	0.001	0.001	0	0.001	0.002	0.016	0	0.011	299.275	0.893	1.94322
2011-07-08	1	0.004	0.001	0.003	0.001	0.001	0	0.001	0.002	0.017	0	0.012	298.987	0.899	1.92119
2011-07-08	2	0.004	0.002	0.004	0.001	0.001	0.001	0.002	0.003	0.019	0	0.014	298.762	0.903	1.91877
2011-07-08	3	0.004	0.003	0.003	0.001	0.001	0.001	0.002	0.003	0.019	0	0.014	298.544	0.918	2.02136
2011-07-08	4	0.004	0.003	0.003	0.001	0.001	0.001	0.002	0.004	0.019	0	0.015	298.518	0.912	1.99782
2011-07-08	5	0.006	0.003	0.002	0.001	0.001	0.001	0.002	0.004	0.018	0	0.014	298.476	0.912	2.07938
2011-07-08	6	0.007	0.002	0.002	0.001	0.001	0.001	0.002	0.004	0.017	0	0.014	298.297	0.934	2.12569
2011-07-08	7	0.008	0.002	0.002	0.001	0.002	0.001	0.002	0.004	0.016	0	0.014	298.733	0.93	2.12384
2011-07-08	8	0.007	0.003	0.002	0.001	0.002	0.001	0.002	0.003	0.015	0	0.014	300.257	0.894	2.11543
2011-07-08	9	0.007	0.007	0.005	0.001	0.003	0.001	0.002	0.003	0.014	0	0.013	301.469	0.865	1.9569
2011-07-08	10	0.004	0.009	0.009	0	0.002	0	0.001	0.002	0.013	0	0.011	302.842	0.812	-0.429634
2011-07-08	11	0.003	0.008	0.011	0	0.001	0	0.001	0.001	0.01	0	0.008	303.953	0.772	-0.333685
2011-07-08	12	0.002	0.005	0.01	0	0.001	0	0	0.001	0.01	0	0.008	304.653	0.736	-0.437293
2011-07-08	13	0.003	0.003	0.009	0	0	0	0	0.001	0.011	0	0.009	304.552	0.715	-0.456103
2011-07-08	14	0.002	0.002	0.008	0	0	0	0	0.001	0.014	0	0.008	305.829	0.694	-0.741493
2011-07-08	15	0.003	0.002	0.01	0	0	0	0	0.001	0.014	0	0.009	305.934	0.681	-0.917526
2011-07-08	16	0.004	0.002	0.009	0	0	0	0	0.001	0.014	0	0.008	305.838	0.67	-0.630367
2011-07-08	17	0.006	0.001	0.007	0	0	0	0	0.001	0.012	0	0.008	305.286	0.666	-0.45572
2011-07-08	18	0.007	0.001	0.004	0	0	0	0.001	0.001	0.01	0	0.007	304.521	0.68	0.126092
2011-07-08	19	0.009	0.001	0.002	0.001	0	0	0.001	0.001	0.007	0	0.006	303.792	0.699	1.96934
2011-07-08	20	0.009	0.001	0.001	0.001	0	0	0.001	0.002	0.005	0	0.005	302.802	0.694	2.09018
2011-07-08	21	0.009	0.001	0.001	0.001	0.001	0	0.001	0.002	0.004	0	0.005	301.632	0.74	2.07413
2011-07-08	22	0.01	0.001	0.001	0.001	0.001	0	0.001	0.001	0.004	0	0.005	301.271	0.729	2.02016
2011-07-08	23	0.01	0.001	0.001	0.001	0.001	0	0.001	0.001	0.004	0	0.004	300.349	0.794	2.07079
2011-07-08	24	0.009	0.001	0.001	0.001	0.001	0	0.001	0.001	0.004	0	0.004	299.742	0.837	2.11097
2011-08-08	1	0.007	0.001	0.001	0.001	0.002	0	0.001	0.001	0.004	0	0.004	299.202	0.858	2.11277
2011-08-08	2	0.006	0.001	0.001	0.001	0.002	0	0.001	0.001	0.004	0	0.005	298.545	0.893	2.11055
2011-08-08	3	0.006	0.002	0.001	0.001	0.003	0	0.001	0.001	0.004	0	0.005	298.143	0.914	2.15238
2011-08-08	4	0.006	0.003	0.001	0.001	0.003	0	0.001	0.001	0.005	0	0.005	297.899	0.931	2.1984
2011-08-08	5	0.007	0.003	0.001	0.001	0.004	0	0.001	0.001	0.004	0	0.006	297.868	0.923	2.16209
2011-08-08	6	0.008	0.003	0.001	0.001	0.004	0	0.001	0.001	0.004	0	0.006	297.721	0.93	2.18642
2011-08-08	7	0.01	0.004	0.001	0.001	0.005	0	0.001	0.002	0.003	0	0.007	298.013	0.937	2.22652
2011-08-08	8	0.008	0.008	0.003	0.001	0.005	0	0.001	0.002	0.004	0	0.008	299.844	0.873	1.91657
2011-08-08	9	0.005	0.024	0.011	0.001	0.004	0	0.001	0.002	0.006	0.001	0.008	301.401	0.819	1.60824
2011-08-08	10	0.003	0.03	0.018	0	0.002	0	0.001	0.002	0.006	0	0.006	302.903	0.762	-1.15739
2011-08-08	11	0.003	0.021	0.017	0	0.001	0	0.001	0.001	0.007	0	0.006	304.312	0.709	-1.2932
2011-08-08	12	0.004	0.014	0.016	0	0.001	0	0.001	0.001	0.008	0	0.006	305.5	0.668	-1.17693
2011-08-08	13	0.005	0.009	0.015	0	0	0	0.001	0.001	0.008	0	0.006	306.651	0.631	-1.20942
2011-08-08	14	0.007	0.007	0.013	0	0	0	0.001	0.001	0.008	0	0.006	306.99	0.617	-0.924076
2011-08-08	15	0.007	0.005	0.012	0	0	0	0.001	0.001	0.008	0	0.006	306.45	0.619	-0.846783
2011-08-08	16	0.007	0.003	0.01	0	0	0	0	0.001	0.008	0	0.006	305.416	0.637	-0.76513
2011-08-08	17	0.006	0.002	0.008	0	0	0	0	0.001	0.008	0	0.005	304.205	0.664	-0.396633
2011-08-08	18	0.004	0.001	0.006	0	0	0	0	0.001	0.008	0	0.005	303.455	0.681	-0.453514
2011-08-08	19	0.005	0.001	0.005	0	0	0	0.001	0.001	0.008	0	0.005	302.562	0.704	0.181643
2011-08-08	20	0.007	0.001	0.005	0	0	0	0.001	0.001	0.007	0	0.005	301.092	0.738	0.433417
2011-08-08	21	0.006	0.001	0.004	0	0	0	0.001	0.002	0.006	0	0.005	300.043	0.781	0.675397
2011-08-08	22	0.005	0.001	0.003	0	0	0	0.001	0.002	0.004	0	0.005	299.375	0.812	0.369822
2011-08-08	23	0.005	0.001	0.002	0.001	0.001	0	0.001	0.002	0.003	0	0.005	298.949	0.829	1.90524
2011-08-08	24	0.004	0.001	0.001	0.001	0.001	0	0.001	0.002	0.002	0	0.004	298.661	0.845	2.0981
2011-09-08	1	0.004	0	0.001	0.001	0.001	0	0.001	0.001	0.002	0	0.003	298.383	0.865	2.12852
2011-09-08	2	0.003	0	0	0.001	0.001	0	0.001	0.001	0.002	0	0.003	298.233	0.875	2.40946
2011-09-08	3	0.003	0.001	0	0.001	0.001	0	0.001	0	0.002	0	0.003	298.127	0.884	2.38103
2011-09-08	4	0.003	0.002	0.001	0.001	0.002	0	0.001	0	0.003	0	0.004	297.988	0.895	2.12789
2011-09-08	5	0.003	0.004	0.002	0.001	0.003	0	0.001	0.001	0.005	0	0.005	297.865	0.905	2.02677
2011-09-08	6	0.003	0.007	0.004	0.001	0.003	0	0.001	0.001	0.006	0	0.006	297.741	0.916	1.91315
2011-09-08	7	0.004	0.009	0.007	0.001	0.004	0	0.001	0.001	0.007	0	0.008	298.075	0.911	1.77294
2011-09-08	8	0.005	0.013	0.013	0.002	0.004	0	0.001	0.002	0.007	0.001	0.008	299.717	0.866	1.58837
2011-09-08	9	0.01	0.026	0.023	0.001	0.003	0	0.001	0.002	0.007	0.001	0.008	301.327	0.812	1.44375
2011-09-08	10	0.011	0.028	0.018	0.001	0.001	0	0.001	0.001	0.006	0.001	0.005	302.599	0.766	1.53148
2011-09-08	11	0.008	0.017	0.011	0.001	0.001	0	0.001	0.001	0.004	0.001	0.004	303.925	0.72	1.66687
2011-09-08	12	0.005	0.007	0.008	0.001	0	0	0	0.001	0.005	0	0.004	303.387	0.728	1.62336
2011-09-08	13	0.003	0.002	0.005	0.001	0	0	0	0.001	0.006	0	0.004	303.569	0.721	1.71932
2011-09-08	14	0.003	0.001	0.004	0.001	0	0	0	0.001	0.006	0	0.004	303.536	0.724	1.76396
2011-09-08	15	0.003	0.001	0.004	0.001	0	0	0	0.001	0.008	0	0.005	303.233	0.728	1.76141
2011-09-08	16	0.003	0.001	0.004	0.001	0	0	0	0.001	0.009	0	0.006	303.016	0.724	1.74029
2011-09-08	17	0.004	0.001	0.004	0.001	0	0	0	0.001	0.01	0	0.006	302.619	0.72	1.72189
2011-09-08	18	0.005	0.001	0.004	0.001	0	0	0.001	0.001	0.011	0	0.007	301.668	0.736	1.76064
2011-09-08	19	0.006	0	0.003	0.001	0	0	0.001	0.001	0.011	0	0.007	300.555	0.813	1.86037
2011-09-08	20	0.006	0	0.002	0.001	0	0	0.001	0.001	0.012	0	0.007	299.555	0.857	1.98088
2011-09-08	21	0.005	0	0.001	0.001	0	0	0.001	0.001	0.012	0	0.007	298.949	0.873	2.06121
2011-09-08	22	0.005	0	0.001	0.001	0	0	0.001	0.001	0.011	0	0.007	298.611	0.871	2.06132
2011-09-08	23	0.005	0	0.001	0.001	0.001	0	0.001	0.001	0.01	0	0.006	298.206	0.902	2.12982
2011-09-08	24	0.005	0	0.001	0.001	0.001	0	0.001	0.001	0.009	0	0.006	297.98	0.913	2.14966
2011-10-08	1	0.005	0	0.001	0	0.001	0	0.001	0	0.008	0	0.005	297.63	0.943	1.26557
2011-10-08	2	0.005	0	0.001	0	0.001	0	0.001	0	0.006	0	0.004	297.377	0.958	1.48622
2011-10-08	3	0.004	0	0.001	0	0.001	0	0.001	0	0.006	0	0.004	297.17	0.972	1.50847
2011-10-08	4	0.004	0	0.001	0	0.001	0	0.001	0	0.005	0	0.004	297.055	0.98	1.54307
2011-10-08	5	0.005	0	0.001	0	0.001	0	0.001	0	0.005	0	0.004	296.967	0.986	1.92742
2011-10-08	6	0.006	0	0.001	0	0.002	0	0.001	0	0.004	0	0.004	296.875	0.99	2.10113
2011-10-08	7	0.008	0.001	0.001	0	0.002	0	0.001	0	0.004	0	0.004	297.211	0.99	2.2473
2011-10-08	8	0.009	0.001	0.001	0	0.002	0	0.001	0	0.003	0	0.004	298.613	0.961	1.68541
2011-10-08	9	0.008	0.007	0.003	0	0.003	0	0.001	0.001	0.003	0	0.004	300.461	0.891	1.33279
2011-10-08	10	0.005	0.028	0.007	0	0.003	0	0.001	0.001	0.005	0	0.005	302.179	0.817	0.160562
2011-10-08	11	0.002	0.028	0.008	0	0.002	0	0	0.001	0.01	0	0.008	303.292	0.767	-0.347595
2011-10-08	12	0.001	0.013	0.008	0	0.001	0	0	0.001	0.01	0	0.009	304.192	0.727	-0.351202
2011-10-08	13	0.001	0.007	0.008	0	0.001	0	0	0.001	0.01	0	0.009	305.62	0.674	-0.437475
2011-10-08	14	0.001	0.007	0.007	0	0.001	0	0	0.001	0.009	0	0.009	306.207	0.653	-0.356526
2011-10-08	15	0.001	0.008	0.007	0	0.001	0	0	0.001	0.009	0	0.009	305.595	0.664	-0.345133
2011-10-08	16	0.001	0.007	0.006	0	0.001	0	0	0.001	0.01	0	0.008	304.515	0.696	-0.48272
2011-10-08	17	0.002	0.006	0.004	0	0.001	0	0	0.001	0.01	0	0.008	302.946	0.742	-0.407514
2011-10-08	18	0.002	0.005	0.003	0	0	0	0	0.001	0.01	0	0.008	301.745	0.791	-0.313228
2011-10-08	19	0.002	0.004	0.003	0	0.001	0	0	0.001	0.01	0	0.008	300.381	0.846	-0.144458
2011-10-08	20	0.002	0.004	0.003	0	0.001	0	0	0.001	0.01	0	0.008	299.421	0.884	-0.0399299
2011-10-08	21	0.002	0.003	0.002	0	0.001	0	0.001	0.001	0.01	0	0.008	298.828	0.903	0.0735782
2011-10-08	22	0.002	0.002	0.001	0	0.001	0	0.001	0.001	0.01	0	0.007	298.38	0.912	0.832458
2011-10-08	23	0.002	0.001	0.001	0	0.001	0	0.001	0.001	0.011	0	0.007	297.902	0.922	0.899928
2011-10-08	24	0.003	0.001	0.001	0	0.001	0	0.001	0.001	0.01	0	0.006	297.452	0.931	1.19536
2011-11-08	1	0.004	0.001	0.001	0	0.001	0	0.001	0.001	0.009	0	0.006	297.046	0.94	1.28889
2011-11-08	2	0.008	0.001	0.001	0	0.001	0	0.001	0.001	0.009	0	0.006	296.767	0.945	1.66562
2011-11-08	3	0.01	0.002	0.001	0	0.001	0	0.001	0.001	0.008	0	0.006	296.661	0.945	1.72008
2011-11-08	4	0.011	0.002	0.001	0	0.001	0	0.001	0.001	0.008	0	0.005	296.625	0.945	1.87793
2011-11-08	5	0.011	0.002	0.001	0	0.001	0	0.001	0.001	0.007	0	0.005	296.591	0.947	1.84116
2011-11-08	6	0.01	0.001	0.001	0	0.001	0	0.001	0.001	0.007	0	0.005	296.587	0.946	1.79973
2011-11-08	7	0.008	0.001	0.001	0	0.001	0	0.001	0.001	0.006	0	0.005	296.754	0.948	1.63938
2011-11-08	8	0.004	0.002	0.001	0.001	0.002	0	0.001	0.001	0.007	0	0.006	297.918	0.93	2.19895
2011-11-08	9	0.002	0.003	0.002	0	0.002	0	0.001	0.001	0.011	0	0.008	299.1	0.896	0.511821
2011-11-08	10	0.002	0.002	0.003	0	0.002	0	0.001	0.001	0.012	0	0.009	300.206	0.848	0.107209
2011-11-08	11	0.005	0.003	0.005	0	0.001	0	0	0.001	0.014	0	0.008	301.322	0.79	0.286687
2011-11-08	12	0.009	0.003	0.006	0	0.001	0	0	0.001	0.012	0	0.007	302.353	0.734	0.521037
2011-11-08	13	0.01	0.003	0.005	0	0.001	0	0	0.001	0.009	0	0.006	303.014	0.693	0.522784
2011-11-08	14	0.011	0.002	0.004	0	0.001	0	0	0	0.008	0	0.005	303.209	0.677	0.414013
2011-11-08	15	0.011	0.002	0.004	0	0.001	0	0	0	0.007	0	0.005	303.173	0.67	0.351967
2011-11-08	16	0.012	0.003	0.004	0	0.001	0	0	0	0.007	0	0.004	303.106	0.664	0.466808
2011-11-08	17	0.013	0.003	0.003	0.001	0.001	0	0	0	0.006	0	0.004	302.811	0.662	0.475558
2011-11-08	18	0.015	0.003	0.002	0.001	0.001	0	0	0	0.006	0	0.004	302.4	0.663	0.554514
2011-11-08	19	0.013	0.003	0.002	0.001	0.001	0	0.001	0	0.005	0	0.004	301.766	0.686	1.87489
2011-11-08	20	0.013	0.002	0.001	0.001	0.001	0	0.001	0	0.005	0	0.004	300.816	0.684	1.94917
2011-11-08	21	0.015	0.002	0.002	0.001	0.001	0	0.001	0	0.004	0	0.004	299.975	0.695	1.80178
2011-11-08	22	0.018	0.003	0.002	0.001	0.001	0	0.001	0.001	0.004	0	0.004	299.264	0.719	1.81858
2011-11-08	23	0.022	0.003	0.002	0.001	0.001	0	0.001	0.001	0.004	0	0.004	298.61	0.753	1.79995
2011-11-08	24	0.025	0.004	0.002	0.001	0.001	0	0.001	0.001	0.004	0	0.003	297.992	0.794	1.89447
2011-12-08	1	0.027	0.004	0.002	0	0.001	0	0.001	0.001	0.003	0	0.003	297.389	0.838	1.89401
2011-12-08	2	0.027	0.004	0.002	0	0.001	0	0.001	0.001	0.003	0	0.003	296.951	0.869	1.98265
2011-12-08	3	0.026	0.004	0.003	0	0.001	0	0.001	0.001	0.003	0	0.003	296.69	0.885	2.02794
2011-12-08	4	0.026	0.004	0.003	0	0.001	0	0.001	0.001	0.003	0	0.003	296.502	0.897	2.06679
2011-12-08	5	0.026	0.003	0.003	0	0.001	0	0.001	0.001	0.003	0	0.003	296.339	0.908	2.10816
2011-12-08	6	0.025	0.003	0.003	0	0.001	0	0.002	0.001	0.002	0	0.003	296.187	0.922	2.26551
2011-12-08	7	0.022	0.003	0.002	0	0.001	0	0.002	0.001	0.001	0	0.003	296.435	0.932	2.28274
2011-12-08	8	0.016	0.004	0.002	0	0.001	0	0.002	0.002	0	0	0.004	298.082	0.888	1.88496
2011-12-08	9	0.015	0.011	0.006	0	0.001	0	0.002	0.002	0.001	0	0.004	299.937	0.824	1.47905
2011-12-08	10	0.014	0.018	0.007	0	0.001	0	0.001	0.002	0.003	0	0.004	301.568	0.763	1.23877
2011-12-08	11	0.012	0.024	0.006	0	0.001	0	0.001	0.001	0.004	0	0.004	303.268	0.689	0.888125
2011-12-08	12	0.009	0.032	0.007	0	0.001	0	0.001	0.001	0.005	0	0.004	304.431	0.645	0.593049
2011-12-08	13	0.007	0.032	0.007	0	0	0	0.001	0.001	0.007	0	0.005	305.392	0.61	-0.0630116
2011-12-08	14	0.006	0.025	0.008	0	0	0	0.001	0.001	0.01	0	0.007	305.789	0.599	-0.553273
2011-12-08	15	0.005	0.016	0.009	0	0	0	0.001	0.001	0.013	0	0.009	305.672	0.603	-0.79864
2011-12-08	16	0.005	0.011	0.009	0	0	0	0.001	0.002	0.017	0	0.011	305.495	0.609	-0.523748
2011-12-08	17	0.005	0.008	0.008	0	0	0	0.001	0.002	0.018	0	0.012	305.018	0.621	-0.504373
2011-12-08	18	0.006	0.006	0.007	0	0.001	0	0.001	0.002	0.018	0	0.012	304.382	0.634	-0.172876
2011-12-08	19	0.007	0.005	0.005	0	0.001	0	0.001	0.003	0.017	0	0.012	303.482	0.661	0.232082
2011-12-08	20	0.01	0.004	0.004	0	0.001	0.001	0.002	0.004	0.015	0	0.013	302.32	0.672	0.764782
2011-12-08	21	0.015	0.004	0.004	0	0.001	0.001	0.002	0.005	0.012	0	0.013	301.372	0.689	1.03979
2011-12-08	22	0.018	0.004	0.004	0	0.001	0.001	0.002	0.005	0.011	0	0.013	300.565	0.714	1.15818
2011-12-08	23	0.02	0.004	0.004	0	0.001	0.001	0.003	0.006	0.009	0	0.013	299.77	0.751	1.45611
2011-12-08	24	0.02	0.004	0.004	0	0.001	0.001	0.003	0.006	0.008	0	0.013	298.997	0.797	1.56097
08/13/2011	1	0.019	0.004	0.004	0	0.001	0.001	0.003	0.007	0.006	0	0.012	298.272	0.846	1.84075
08/13/2011	2	0.019	0.005	0.003	0	0.001	0.001	0.003	0.007	0.005	0	0.012	297.744	0.877	1.92674
08/13/2011	3	0.019	0.005	0.002	0.001	0.001	0.001	0.003	0.007	0.005	0	0.012	297.432	0.89	2.14847
08/13/2011	4	0.019	0.005	0.002	0.001	0.001	0.001	0.003	0.007	0.005	0	0.012	297.221	0.896	2.14967
08/13/2011	5	0.02	0.005	0.002	0.001	0.001	0.001	0.003	0.007	0.004	0	0.012	297.051	0.9	2.14395
08/13/2011	6	0.022	0.005	0.002	0.001	0.001	0.001	0.004	0.007	0.004	0	0.012	296.918	0.905	2.36921
08/13/2011	7	0.025	0.006	0.002	0	0.001	0.001	0.004	0.007	0.003	0	0.012	297.176	0.912	2.29195
08/13/2011	8	0.023	0.005	0.002	0	0.001	0.001	0.004	0.007	0.003	0	0.012	299.169	0.855	2.04653
08/13/2011	9	0.01	0.007	0.012	0	0.001	0.001	0.002	0.004	0.014	0.001	0.013	300.779	0.787	0.245132
08/13/2011	10	0.004	0.007	0.021	0	0.001	0	0.001	0.003	0.018	0	0.013	301.927	0.735	-0.958626
08/13/2011	11	0.002	0.004	0.014	0	0	0	0.001	0.002	0.016	0	0.012	302.982	0.681	-0.446954
08/13/2011	12	0.002	0.002	0.01	0	0	0	0.001	0.001	0.014	0	0.011	303.837	0.637	-0.505727
08/13/2011	13	0.002	0.001	0.007	0	0	0	0.001	0.001	0.013	0	0.01	304.796	0.595	-0.601727
08/13/2011	14	0.002	0.001	0.005	0	0	0	0	0.001	0.012	0	0.01	305.368	0.57	-0.594801
08/13/2011	15	0.001	0.001	0.006	0	0	0	0	0.001	0.012	0	0.01	305.775	0.561	-0.482078
08/13/2011	16	0.001	0.001	0.007	0	0	0	0	0.001	0.013	0	0.011	305.01	0.585	-0.387128
08/13/2011	17	0.002	0.001	0.005	0	0	0	0	0.001	0.012	0	0.009	304.221	0.602	-0.631356
08/13/2011	18	0.002	0.001	0.004	0	0	0	0.001	0.001	0.012	0	0.008	303.735	0.602	-0.584551
08/13/2011	19	0.005	0.001	0.004	0	0	0	0.001	0.001	0.011	0	0.007	302.845	0.61	-0.0688172
08/13/2011	20	0.01	0.001	0.003	0	0	0	0.001	0.001	0.011	0	0.007	301.176	0.667	0.562471
08/13/2011	21	0.018	0.002	0.003	0	0.001	0	0.001	0.001	0.011	0	0.008	300.136	0.711	0.947991
08/13/2011	22	0.024	0.003	0.003	0	0.001	0	0.002	0.002	0.011	0	0.008	299.432	0.744	1.35642
08/13/2011	23	0.026	0.003	0.003	0	0.001	0	0.002	0.002	0.011	0	0.009	298.896	0.776	1.43006
08/13/2011	24	0.025	0.003	0.003	0	0.001	0	0.002	0.002	0.01	0	0.008	298.342	0.822	1.56585
08/14/2011	1	0.019	0.002	0.002	0.001	0.001	0	0.002	0.001	0.01	0	0.008	297.763	0.878	1.97721
08/14/2011	2	0.012	0.001	0.001	0.001	0.001	0	0.002	0.001	0.009	0	0.007	297.388	0.912	2.15784
08/14/2011	3	0.008	0.001	0.001	0.001	0.001	0	0.001	0.001	0.008	0	0.006	297.182	0.927	2.17963
08/14/2011	4	0.006	0	0.001	0	0.001	0	0.001	0.001	0.007	0	0.005	297.049	0.936	1.48201
08/14/2011	5	0.004	0	0.001	0	0.001	0	0.001	0.001	0.006	0	0.004	296.946	0.945	1.5396
08/14/2011	6	0.004	0	0.001	0	0.001	0	0.001	0.001	0.005	0	0.004	296.822	0.952	1.45202
08/14/2011	7	0.004	0	0.001	0	0.001	0	0.001	0.001	0.004	0	0.003	297.099	0.94	1.5619
08/14/2011	8	0.003	0	0.001	0.001	0	0	0.001	0.001	0.004	0	0.003	298.587	0.892	2.17451
08/14/2011	9	0.003	0.001	0.002	0.001	0	0	0.001	0.001	0.004	0	0.003	300.119	0.828	2.05178
08/14/2011	10	0.004	0.001	0.002	0.001	0	0	0.001	0.001	0.004	0	0.003	301.849	0.733	2.02397
08/14/2011	11	0.004	0.001	0.003	0.001	0	0	0.001	0.001	0.004	0	0.004	303.283	0.668	1.88952
08/14/2011	12	0.003	0.001	0.004	0	0	0	0	0.001	0.006	0	0.004	304.48	0.615	-0.508247
08/14/2011	13	0.002	0.001	0.005	0	0	0	0	0.001	0.007	0	0.005	305.876	0.558	-1.046
08/14/2011	14	0.002	0	0.006	0	0	0	0	0.001	0.007	0	0.005	307.05	0.503	-1.22192
08/14/2011	15	0.002	0	0.006	0	0	0	0.001	0.001	0.007	0	0.005	306.971	0.498	-1.08852
08/14/2011	16	0.003	0	0.006	0	0	0	0.001	0.001	0.008	0	0.005	306.391	0.512	-0.693609
08/14/2011	17	0.004	0	0.005	0	0	0	0.001	0.001	0.008	0	0.006	305.386	0.535	-0.65551
08/14/2011	18	0.006	0.001	0.003	0.001	0	0	0.001	0.001	0.007	0	0.006	304.165	0.575	1.79541
08/14/2011	19	0.006	0.001	0.002	0.001	0	0	0.001	0.002	0.006	0	0.006	302.657	0.629	1.86726
08/14/2011	20	0.005	0.001	0.001	0.001	0.001	0	0.001	0.002	0.006	0	0.006	299.634	0.758	1.97921
08/14/2011	21	0.004	0.001	0.001	0.002	0.001	0	0.001	0.002	0.005	0	0.006	298.203	0.808	1.9287
08/14/2011	22	0.004	0.001	0.001	0.002	0.001	0	0.001	0.002	0.004	0	0.006	297.371	0.829	1.93314
08/14/2011	23	0.003	0.002	0.001	0.002	0.001	0	0.001	0.002	0.004	0	0.006	296.714	0.841	-0.0913237
08/14/2011	24	0.003	0.003	0.001	0.002	0.001	0	0.001	0.002	0.004	0	0.006	296.15	0.854	-0.0542887
08/15/2011	1	0.003	0.004	0.002	0.002	0.001	0	0.001	0.002	0.006	0	0.007	295.637	0.86	0.00846147
08/15/2011	2	0.003	0.006	0.002	0.002	0.001	0	0.002	0.001	0.011	0	0.009	295.213	0.861	1.79091
08/15/2011	3	0.003	0.007	0.002	0.002	0.002	0	0.002	0.002	0.015	0	0.011	294.843	0.858	1.7688
08/15/2011	4	0.003	0.008	0.002	0.002	0.002	0	0.002	0.002	0.017	0	0.013	294.473	0.86	1.74666
08/15/2011	5	0.003	0.008	0.002	0.002	0.002	0	0.002	0.002	0.019	0	0.014	294.069	0.867	1.74891
08/15/2011	6	0.004	0.008	0.003	0.002	0.002	0	0.002	0.002	0.02	0	0.015	293.682	0.879	1.6855
08/15/2011	7	0.004	0.007	0.003	0.002	0.002	0	0.002	0.002	0.021	0.001	0.015	293.586	0.867	1.60623
08/15/2011	8	0.004	0.014	0.009	0.002	0.002	0	0.003	0.002	0.023	0.001	0.016	294.771	0.826	1.40672
08/15/2011	9	0.006	0.026	0.02	0.001	0.002	0	0.003	0.003	0.027	0.002	0.019	296.782	0.743	1.18702
08/15/2011	10	0.004	0.042	0.034	0.001	0.001	0	0.002	0.003	0.04	0.002	0.027	298.817	0.62	-0.248339
08/15/2011	11	0.002	0.042	0.043	0	0.001	0	0.002	0.004	0.049	0.002	0.035	300.713	0.54	-0.527793
08/15/2011	12	0.002	0.031	0.038	0	0.001	0	0.002	0.004	0.047	0.002	0.035	302.657	0.468	-0.697079
08/15/2011	13	0.002	0.026	0.032	0.001	0.001	0	0.002	0.004	0.045	0.001	0.033	304.433	0.405	-0.746198
08/15/2011	14	0.003	0.021	0.025	0.001	0.001	0	0.002	0.004	0.044	0.001	0.031	305.231	0.377	-0.727772
08/15/2011	15	0.004	0.019	0.021	0.001	0.001	0	0.002	0.003	0.044	0.001	0.031	304.817	0.386	-0.722331
08/15/2011	16	0.004	0.018	0.019	0.001	0.001	0	0.002	0.003	0.045	0.001	0.031	303.871	0.412	-0.664901
08/15/2011	17	0.004	0.018	0.018	0	0.001	0	0.002	0.003	0.046	0.001	0.031	302.563	0.445	-0.569435
08/15/2011	18	0.004	0.019	0.016	0	0.001	0	0.002	0.003	0.048	0.001	0.032	301.233	0.479	-0.502982
08/15/2011	19	0.005	0.016	0.013	0	0.001	0	0.002	0.004	0.05	0.001	0.032	300.305	0.509	-0.358824
08/15/2011	20	0.007	0.014	0.011	0	0.001	0.001	0.002	0.004	0.051	0.001	0.032	298.77	0.552	-0.288588
08/15/2011	21	0.013	0.013	0.01	0	0.001	0.001	0.003	0.005	0.05	0.001	0.032	297.559	0.596	0.455265
08/15/2011	22	0.016	0.011	0.008	0.001	0.001	0.001	0.003	0.006	0.049	0.001	0.033	296.568	0.647	1.28271
08/15/2011	23	0.014	0.009	0.006	0.001	0.001	0.001	0.004	0.007	0.051	0.001	0.035	295.782	0.696	1.36571
08/15/2011	24	0.011	0.008	0.005	0.002	0.002	0.001	0.004	0.007	0.053	0.001	0.037	295.296	0.723	1.38688
08/16/2011	1	0.009	0.007	0.004	0.002	0.002	0.001	0.004	0.008	0.057	0.001	0.04	294.61	0.784	1.46846
08/16/2011	2	0.004	0.007	0.004	0.002	0.002	0.001	0.005	0.008	0.063	0.001	0.041	294.109	0.824	1.51694
08/16/2011	3	0.004	0.007	0.005	0.002	0.002	0.001	0.005	0.008	0.064	0.001	0.043	293.74	0.843	0.393814
08/16/2011	4	0.004	0.011	0.007	0.001	0.003	0.001	0.005	0.008	0.066	0.002	0.044	293.361	0.86	0.467485
08/16/2011	5	0.004	0.016	0.011	0.001	0.003	0.001	0.005	0.008	0.069	0.002	0.045	293	0.875	0.546116
08/16/2011	6	0.004	0.017	0.012	0.001	0.003	0.001	0.005	0.008	0.07	0.002	0.046	292.729	0.887	0.583876
08/16/2011	7	0.004	0.021	0.015	0.001	0.003	0.001	0.006	0.008	0.071	0.002	0.047	292.541	0.906	0.675037
08/16/2011	8	0.003	0.034	0.029	0.001	0.003	0.001	0.005	0.008	0.072	0.003	0.05	293.794	0.873	0.454057
08/16/2011	9	0.002	0.051	0.043	0	0.002	0.001	0.005	0.007	0.07	0.002	0.053	296.339	0.772	0.00662597
08/16/2011	10	0.001	0.075	0.057	0	0.002	0.001	0.004	0.007	0.065	0.002	0.054	298.909	0.662	-0.308733
08/16/2011	11	0.001	0.072	0.067	0	0.002	0.001	0.003	0.006	0.06	0.001	0.053	301.077	0.565	-0.252109
08/16/2011	12	0.001	0.059	0.064	0	0.001	0.001	0.003	0.005	0.056	0.001	0.052	302.844	0.505	-0.0273371
08/16/2011	13	0.001	0.051	0.055	0	0.001	0.001	0.003	0.005	0.052	0.001	0.05	304.69	0.449	0.023759
08/16/2011	14	0.001	0.047	0.049	0	0.001	0.001	0.002	0.005	0.05	0.001	0.049	305.836	0.417	0.0726219
08/16/2011	15	0.001	0.044	0.044	0	0.001	0.001	0.002	0.004	0.049	0.001	0.046	305.993	0.407	-0.00072994
08/16/2011	16	0.001	0.039	0.037	0	0.001	0.001	0.002	0.004	0.047	0.001	0.043	305.676	0.407	-0.0976386
08/16/2011	17	0.001	0.035	0.03	0	0.001	0.001	0.002	0.004	0.046	0.001	0.04	304.478	0.418	-0.265408
08/16/2011	18	0.001	0.031	0.022	0	0.001	0.001	0.002	0.004	0.049	0.001	0.04	303.813	0.43	-0.462619
08/16/2011	19	0.002	0.025	0.015	0.001	0.001	0.001	0.002	0.005	0.052	0.001	0.039	302.251	0.52	-0.494567
08/16/2011	20	0.004	0.024	0.012	0.001	0.001	0.001	0.003	0.005	0.056	0.001	0.04	300.888	0.457	-0.47987
08/16/2011	21	0.005	0.024	0.008	0.002	0.001	0.001	0.003	0.006	0.061	0.001	0.042	299.252	0.512	-0.282578
08/16/2011	22	0.009	0.028	0.008	0.003	0.002	0.001	0.004	0.006	0.066	0.001	0.043	298.102	0.563	1.24685
08/16/2011	23	0.018	0.032	0.008	0.002	0.002	0.001	0.004	0.007	0.067	0.001	0.044	297.123	0.616	1.27932
08/16/2011	24	0.026	0.033	0.008	0.002	0.002	0.001	0.004	0.009	0.065	0.002	0.045	296.193	0.683	1.26316
08/17/2011	1	0.03	0.032	0.007	0.002	0.002	0.002	0.005	0.01	0.062	0.002	0.045	295.514	0.738	1.41183
08/17/2011	2	0.026	0.032	0.006	0.002	0.002	0.002	0.005	0.011	0.058	0.002	0.044	294.795	0.803	1.53198
08/17/2011	3	0.021	0.032	0.006	0.002	0.002	0.002	0.005	0.011	0.054	0.002	0.043	294.5	0.815	1.48241
08/17/2011	4	0.019	0.03	0.006	0.002	0.003	0.002	0.005	0.012	0.05	0.002	0.041	294.332	0.816	1.53231
08/17/2011	5	0.017	0.028	0.007	0.002	0.003	0.002	0.006	0.012	0.046	0.002	0.04	294.267	0.811	1.47041
08/17/2011	6	0.015	0.026	0.008	0.002	0.003	0.002	0.006	0.012	0.042	0.002	0.038	294.306	0.803	1.41462
08/17/2011	7	0.016	0.025	0.01	0.001	0.003	0.002	0.006	0.013	0.037	0.002	0.037	294.689	0.796	1.42238
08/17/2011	8	0.01	0.024	0.013	0.001	0.003	0.002	0.007	0.014	0.039	0.002	0.037	297.131	0.729	1.41238
08/17/2011	9	0.019	0.075	0.039	0	0.003	0.002	0.005	0.011	0.037	0.002	0.034	299.001	0.659	-0.592361
08/17/2011	10	0.026	0.086	0.038	0	0.002	0.001	0.003	0.007	0.044	0.001	0.032	301.203	0.582	-0.440947
08/17/2011	11	0.037	0.08	0.033	0	0.002	0.001	0.002	0.005	0.048	0.001	0.031	303.468	0.482	0.546808
08/17/2011	12	0.035	0.06	0.03	0	0.001	0.001	0.002	0.004	0.051	0.001	0.031	304.88	0.435	0.488343
08/17/2011	13	0.023	0.048	0.028	0	0.001	0	0.002	0.004	0.052	0.001	0.031	306.276	0.397	-0.374891
08/17/2011	14	0.017	0.042	0.027	0	0.001	0	0.002	0.003	0.05	0.001	0.03	307.19	0.373	-0.81838
08/17/2011	15	0.011	0.036	0.028	0	0.001	0	0.002	0.003	0.047	0.001	0.028	307.182	0.37	-1.08974
08/17/2011	16	0.008	0.033	0.028	0	0.001	0	0.002	0.003	0.044	0.001	0.027	306.791	0.376	-1.22497
08/17/2011	17	0.008	0.031	0.027	0	0.001	0	0.002	0.003	0.043	0.001	0.026	306.065	0.387	-1.17958
08/17/2011	18	0.009	0.029	0.024	0	0.001	0	0.002	0.003	0.042	0	0.026	305.719	0.379	-1.08749
08/17/2011	19	0.014	0.027	0.022	0	0.001	0.001	0.002	0.004	0.041	0	0.026	304.893	0.382	-0.564214
08/17/2011	20	0.019	0.025	0.02	0	0.001	0.001	0.002	0.005	0.038	0	0.026	302.828	0.428	-0.0109944
08/17/2011	21	0.022	0.024	0.016	0	0.001	0.001	0.003	0.006	0.036	0	0.026	301.129	0.482	0.594447
08/17/2011	22	0.021	0.024	0.013	0	0.001	0.001	0.003	0.007	0.034	0	0.027	299.785	0.54	0.638685
08/17/2011	23	0.019	0.025	0.01	0	0.001	0.001	0.004	0.007	0.034	0.001	0.027	298.679	0.604	0.787861
08/17/2011	24	0.016	0.029	0.009	0.001	0.001	0.001	0.004	0.008	0.034	0.001	0.028	297.701	0.677	1.39076
08/18/2011	1	0.012	0.034	0.008	0.001	0.001	0.001	0.004	0.008	0.036	0.001	0.029	296.835	0.758	1.45359
08/18/2011	2	0.005	0.04	0.007	0.001	0.001	0.001	0.004	0.008	0.041	0.001	0.03	296.301	0.796	1.50495
08/18/2011	3	0.004	0.044	0.006	0.001	0.002	0.001	0.004	0.008	0.044	0.001	0.032	295.838	0.826	0.278213
08/18/2011	4	0.004	0.045	0.005	0.001	0.002	0.001	0.004	0.008	0.046	0.001	0.034	295.492	0.843	0.300679
08/18/2011	5	0.004	0.042	0.005	0.001	0.002	0.001	0.004	0.008	0.047	0.001	0.035	295.25	0.846	0.325704
08/18/2011	6	0.004	0.037	0.004	0.001	0.002	0.002	0.005	0.008	0.049	0.001	0.036	295.021	0.851	0.372717
08/18/2011	7	0.004	0.033	0.004	0.001	0.002	0.002	0.005	0.009	0.05	0.001	0.036	294.942	0.865	1.68853
08/18/2011	8	0.004	0.033	0.007	0.001	0.002	0.002	0.005	0.009	0.051	0.001	0.037	296.614	0.808	0.260842
08/18/2011	9	0.005	0.044	0.021	0	0.004	0.001	0.004	0.007	0.054	0.001	0.038	299.09	0.707	-0.00555773
08/18/2011	10	0.005	0.045	0.025	0	0.004	0.001	0.004	0.006	0.054	0	0.038	301.572	0.609	-0.192984
08/18/2011	11	0.006	0.036	0.028	0	0.003	0.001	0.003	0.005	0.054	0	0.037	304.128	0.501	-0.388035
08/18/2011	12	0.006	0.029	0.031	0	0.002	0.001	0.003	0.005	0.052	0	0.035	305.938	0.437	-0.503754
08/18/2011	13	0.006	0.028	0.031	0	0.002	0.001	0.002	0.004	0.049	0.001	0.032	307.809	0.384	-0.627414
08/18/2011	14	0.006	0.028	0.029	0	0.001	0.001	0.002	0.004	0.045	0.001	0.029	308.816	0.361	-1.23949
08/18/2011	15	0.007	0.028	0.026	0	0.001	0.001	0.002	0.004	0.041	0.001	0.026	308.555	0.37	-1.10966
08/18/2011	16	0.008	0.029	0.023	0	0.001	0.001	0.002	0.004	0.037	0.001	0.024	307.802	0.391	-0.984486
08/18/2011	17	0.01	0.03	0.021	0	0.001	0.001	0.002	0.004	0.035	0.001	0.023	306.753	0.418	-0.776167
08/18/2011	18	0.012	0.029	0.017	0	0.001	0.001	0.002	0.004	0.034	0.001	0.023	305.775	0.433	-0.468033
08/18/2011	19	0.015	0.026	0.014	0	0.001	0.001	0.002	0.004	0.033	0.001	0.023	304.726	0.456	-0.0455361
08/18/2011	20	0.018	0.022	0.012	0	0.001	0.001	0.003	0.005	0.031	0.001	0.023	302.945	0.503	0.452719
08/18/2011	21	0.022	0.021	0.011	0	0.001	0.001	0.003	0.006	0.029	0.001	0.023	301.52	0.549	0.771531
08/18/2011	22	0.024	0.019	0.011	0	0.001	0.001	0.003	0.006	0.028	0	0.023	300.354	0.602	0.910265
08/18/2011	23	0.025	0.017	0.011	0	0.001	0.001	0.004	0.007	0.027	0	0.023	299.395	0.66	1.15363
08/18/2011	24	0.023	0.014	0.01	0	0.001	0.001	0.004	0.007	0.028	0	0.023	298.568	0.721	1.25952
08/19/2011	1	0.021	0.012	0.009	0	0.001	0.001	0.004	0.007	0.028	0.001	0.024	297.812	0.787	1.25686
08/19/2011	2	0.019	0.01	0.008	0	0.001	0.001	0.004	0.007	0.028	0.001	0.024	297.259	0.835	1.34833
08/19/2011	3	0.016	0.008	0.007	0	0.001	0.001	0.004	0.007	0.029	0.001	0.024	296.911	0.86	1.36407
08/19/2011	4	0.015	0.007	0.006	0	0.002	0.001	0.004	0.006	0.029	0.001	0.024	296.647	0.875	1.38929
08/19/2011	5	0.015	0.006	0.006	0	0.002	0.001	0.004	0.006	0.03	0.001	0.024	296.424	0.889	1.47888
08/19/2011	6	0.016	0.006	0.006	0	0.002	0.001	0.004	0.006	0.029	0.001	0.024	296.252	0.903	1.52926
08/19/2011	7	0.02	0.005	0.006	0	0.002	0.001	0.004	0.007	0.028	0.001	0.024	296.382	0.913	1.74934
08/19/2011	8	0.017	0.005	0.006	0	0.002	0.001	0.004	0.006	0.029	0.001	0.024	298.131	0.857	1.34653
08/19/2011	9	0.012	0.009	0.008	0	0.002	0.001	0.003	0.005	0.036	0.001	0.025	300.336	0.767	0.817796
08/19/2011	10	0.013	0.017	0.01	0	0.002	0.001	0.003	0.004	0.037	0.001	0.026	302.554	0.666	0.369497
08/19/2011	11	0.014	0.062	0.015	0	0.002	0.001	0.002	0.004	0.037	0.001	0.026	304.598	0.569	-0.101691
08/19/2011	12	0.013	0.079	0.019	0	0.002	0.001	0.002	0.004	0.038	0.001	0.026	306.047	0.513	-0.418499
08/19/2011	13	0.012	0.071	0.021	0	0.002	0.001	0.002	0.004	0.038	0.001	0.026	307.605	0.461	-0.640735
08/19/2011	14	0.01	0.063	0.02	0	0.002	0.001	0.002	0.004	0.038	0.001	0.025	308.636	0.428	-0.641324
08/19/2011	15	0.007	0.049	0.018	0	0.001	0.001	0.002	0.004	0.037	0.001	0.024	308.774	0.418	-0.756952
08/19/2011	16	0.006	0.033	0.015	0	0.001	0	0.001	0.003	0.032	0	0.023	308.413	0.42	-0.733217
08/19/2011	17	0.004	0.022	0.013	0	0.001	0	0.001	0.003	0.03	0	0.022	307.732	0.429	-0.72752
08/19/2011	18	0.004	0.014	0.007	0	0.001	0	0.001	0.003	0.027	0	0.02	306.32	0.483	-0.652981
08/19/2011	19	0.005	0.007	0.003	0.001	0.001	0	0.001	0.002	0.025	0	0.017	304.465	0.569	-0.474052
08/19/2011	20	0.006	0.004	0.003	0.001	0.001	0	0.001	0.002	0.023	0	0.015	303.271	0.542	1.67744
08/19/2011	21	0.009	0.003	0.003	0.001	0.001	0.001	0.002	0.003	0.021	0	0.014	302.14	0.564	1.79046
08/19/2011	22	0.01	0.002	0.003	0.001	0.001	0.001	0.002	0.003	0.021	0	0.014	301.069	0.618	1.78066
08/19/2011	23	0.008	0.002	0.002	0.002	0.001	0.001	0.002	0.003	0.02	0	0.014	300.117	0.69	1.84679
08/19/2011	24	0.004	0.001	0.002	0.002	0.001	0	0.002	0.003	0.018	0	0.013	299.239	0.756	1.79841
08/20/2011	1	0.003	0.001	0.001	0.002	0.001	0	0.001	0.002	0.017	0	0.012	298.19	0.838	1.93956
08/20/2011	2	0.003	0.001	0.002	0.002	0.001	0	0.001	0.002	0.015	0	0.011	297.508	0.884	0.13253
08/20/2011	3	0.002	0.001	0.001	0.001	0.001	0	0.001	0.001	0.014	0	0.011	297.109	0.92	0.240982
08/20/2011	4	0.001	0.001	0.001	0.001	0.001	0	0.001	0.001	0.012	0	0.012	296.801	0.942	0.323666
08/20/2011	5	0.001	0	0.001	0.001	0.001	0	0.001	0.001	0.01	0	0.013	296.709	0.942	0.246434
08/20/2011	6	0	0	0.001	0.001	0.001	0	0.001	0.001	0.009	0	0.013	296.649	0.933	0.123484
08/20/2011	7	0	0.002	0.001	0.001	0.001	0	0.001	0.001	0.01	0	0.015	296.601	0.938	0.146802
08/20/2011	8	0.001	0.007	0.004	0.001	0.002	0	0.001	0.003	0.019	0	0.025	297.9	0.904	0.100366
08/20/2011	9	0.001	0.013	0.01	0.001	0.002	0.001	0.002	0.005	0.027	0.001	0.032	299.805	0.834	0.0876501
08/20/2011	10	0.001	0.013	0.017	0.001	0.002	0.001	0.002	0.006	0.031	0.001	0.035	301.866	0.758	0.0217897
08/20/2011	11	0.002	0.01	0.024	0.001	0.002	0.001	0.002	0.005	0.034	0.001	0.031	304.46	0.646	-0.276341
08/20/2011	12	0.003	0.007	0.026	0	0.001	0	0.001	0.003	0.028	0.001	0.022	306.332	0.56	-0.542124
08/20/2011	13	0.004	0.004	0.02	0	0.001	0	0.001	0.002	0.02	0	0.015	307.816	0.503	-0.703622
08/20/2011	14	0.004	0.001	0.011	0	0	0	0.001	0.001	0.016	0	0.012	306.303	0.546	-0.662828
08/20/2011	15	0.003	0	0.005	0	0	0	0	0.001	0.013	0	0.008	306.106	0.553	-0.720303
08/20/2011	16	0.003	0	0.004	0	0	0	0	0.001	0.01	0	0.006	304.651	0.597	-0.474509
08/20/2011	17	0.004	0	0.003	0	0	0	0	0.001	0.007	0	0.004	303.446	0.643	0.0652705
08/20/2011	18	0.005	0	0.002	0.001	0	0	0	0.001	0.005	0	0.004	302.199	0.715	1.84104
08/20/2011	19	0.006	0	0.002	0.001	0	0	0.001	0.001	0.005	0	0.004	301.035	0.772	1.96281
08/20/2011	20	0.007	0	0.001	0.001	0.001	0	0.001	0.001	0.005	0	0.005	299.896	0.785	2.02683
08/20/2011	21	0.007	0	0.001	0.001	0.001	0	0.001	0.002	0.006	0	0.006	299.142	0.79	1.99402
08/20/2011	22	0.006	0.001	0.001	0.002	0.001	0	0.001	0.002	0.008	0	0.008	298.464	0.83	1.93668
08/20/2011	23	0.005	0.001	0.001	0.002	0.001	0.001	0.002	0.002	0.012	0	0.011	297.969	0.87	2.06697
08/20/2011	24	0.004	0.002	0.001	0.002	0.002	0.001	0.002	0.003	0.017	0	0.014	297.5	0.912	2.10428
08/21/2011	1	0.003	0.002	0.001	0.002	0.002	0.001	0.002	0.003	0.02	0	0.015	297.254	0.931	2.13727
08/21/2011	2	0.004	0.003	0.001	0.002	0.002	0.001	0.002	0.003	0.02	0	0.016	297.233	0.912	0.368908
08/21/2011	3	0.005	0.004	0.001	0.002	0.002	0.001	0.002	0.003	0.02	0	0.016	296.944	0.941	2.144
08/21/2011	4	0.006	0.004	0.001	0.002	0.002	0.001	0.002	0.003	0.019	0	0.015	296.983	0.94	2.14633
08/21/2011	5	0.006	0.004	0.001	0.002	0.002	0.001	0.002	0.003	0.019	0	0.015	297.005	0.938	2.15296
08/21/2011	6	0.006	0.004	0.001	0.002	0.002	0.001	0.002	0.003	0.019	0	0.015	297.008	0.939	2.15305
08/21/2011	7	0.007	0.003	0.001	0.001	0.002	0.001	0.002	0.002	0.019	0	0.014	297.219	0.94	2.22931
08/21/2011	8	0.004	0.002	0.001	0.002	0.002	0.001	0.002	0.002	0.019	0	0.013	299.007	0.882	2.10589
08/21/2011	9	0.002	0.002	0.003	0.001	0.002	0	0.001	0.002	0.014	0	0.011	300.388	0.833	-0.0834536
08/21/2011	10	0.002	0.001	0.005	0	0.001	0	0.001	0.001	0.01	0	0.009	301.933	0.769	-0.294191
08/21/2011	11	0.002	0.001	0.006	0	0.001	0	0.001	0.001	0.009	0	0.008	303.499	0.711	-0.443873
08/21/2011	12	0.003	0.001	0.008	0	0.001	0	0.001	0.001	0.009	0	0.008	305.412	0.645	-0.573843
08/21/2011	13	0.003	0.002	0.01	0.001	0.001	0	0.001	0.001	0.011	0	0.008	307.088	0.575	1.67225
08/21/2011	14	0.004	0.001	0.008	0.001	0	0	0.001	0.001	0.011	0	0.007	305.585	0.626	1.69965
08/21/2011	15	0.006	0	0.005	0.001	0	0	0.001	0.001	0.008	0	0.006	305.289	0.638	1.8052
08/21/2011	16	0.008	0	0.004	0.001	0	0	0.001	0.001	0.008	0	0.006	305.408	0.624	1.84169
08/21/2011	17	0.009	0	0.005	0.001	0	0	0.001	0.001	0.008	0	0.006	305.513	0.597	1.78532
08/21/2011	18	0.009	0	0.004	0	0	0	0.001	0.001	0.007	0	0.005	305.334	0.588	0.411146
08/21/2011	19	0.009	0	0.003	0	0	0	0.001	0.001	0.006	0	0.004	303.946	0.624	0.652094
08/21/2011	20	0.01	0	0.002	0.001	0	0	0.001	0.001	0.005	0	0.004	301.995	0.723	1.95376
08/21/2011	21	0.01	0	0.001	0.001	0	0	0.001	0.001	0.005	0	0.004	300.896	0.759	2.06872
08/21/2011	22	0.009	0	0.001	0.001	0	0	0.001	0.001	0.005	0	0.004	300.027	0.806	2.08897
08/21/2011	23	0.007	0	0.001	0.001	0.001	0	0.001	0.001	0.006	0	0.004	299.53	0.835	2.10201
08/21/2011	24	0.006	0	0.001	0.001	0.001	0	0.001	0.001	0.006	0	0.005	299.238	0.84	2.06933
08/22/2011	1	0.005	0	0.001	0.001	0.001	0	0.001	0.001	0.008	0	0.005	298.574	0.915	2.18723
08/22/2011	2	0.006	0.001	0.001	0.001	0.002	0	0.001	0.001	0.009	0	0.006	298.354	0.921	2.17756
08/22/2011	3	0.006	0.001	0.001	0.001	0.002	0	0.001	0.001	0.009	0	0.007	298.045	0.934	2.20382
08/22/2011	4	0.006	0.002	0.001	0.001	0.003	0	0.001	0.001	0.01	0	0.008	297.844	0.943	2.22137
08/22/2011	5	0.007	0.002	0.001	0.001	0.003	0	0.001	0.001	0.009	0	0.008	297.749	0.947	2.24784
08/22/2011	6	0.007	0.002	0.001	0.001	0.003	0	0.001	0.001	0.009	0	0.008	297.649	0.946	2.24478
08/22/2011	7	0.006	0.002	0.001	0.001	0.003	0	0.001	0.001	0.009	0	0.008	297.635	0.941	2.215
08/22/2011	8	0.006	0.002	0.001	0.001	0.002	0	0.001	0.001	0.008	0	0.007	298.856	0.904	2.12161
08/22/2011	9	0.006	0.001	0.002	0.001	0.001	0	0.001	0.001	0.005	0	0.005	300.849	0.838	2.01584
08/22/2011	10	0.007	0.001	0.002	0	0	0	0.001	0.001	0.003	0	0.003	302.847	0.759	0.757255
08/22/2011	11	0.009	0.005	0.004	0	0	0	0.001	0.001	0.003	0	0.003	304.849	0.666	0.776226
08/22/2011	12	0.01	0.017	0.009	0	0	0	0.001	0.002	0.006	0	0.005	306.116	0.609	0.460872
08/22/2011	13	0.011	0.018	0.012	0	0	0	0.001	0.002	0.008	0	0.007	307.32	0.564	-0.344773
08/22/2011	14	0.009	0.016	0.012	0	0	0	0.001	0.002	0.011	0	0.008	308.29	0.531	-0.521121
08/22/2011	15	0.007	0.011	0.01	0	0	0	0.001	0.002	0.015	0	0.01	308.434	0.514	-0.549003
08/22/2011	16	0.007	0.008	0.008	0	0	0	0.001	0.001	0.016	0	0.01	308.291	0.505	-0.470878
08/22/2011	17	0.012	0.008	0.007	0	0	0	0.001	0.001	0.016	0	0.01	307.478	0.509	0.111952
08/22/2011	18	0.017	0.005	0.005	0.001	0.001	0	0.001	0.001	0.015	0	0.01	306.782	0.526	1.76453
08/22/2011	19	0.014	0.002	0.003	0.001	0.001	0	0.002	0.001	0.017	0	0.011	304.491	0.576	1.81847
08/22/2011	20	0.007	0.001	0.003	0.001	0.001	0	0.002	0.001	0.021	0	0.013	302.996	0.601	1.74458
08/22/2011	21	0.008	0.002	0.003	0.001	0.001	0	0.002	0.001	0.023	0	0.014	302.076	0.611	1.70286
08/22/2011	22	0.017	0.003	0.004	0.001	0.001	0	0.002	0.002	0.022	0	0.015	301.316	0.635	1.63411
08/22/2011	23	0.029	0.005	0.005	0.002	0.002	0.001	0.003	0.003	0.015	0	0.014	299.981	0.721	1.72935
08/22/2011	24	0.029	0.007	0.004	0.003	0.002	0.001	0.004	0.006	0.007	0	0.014	299.104	0.785	1.8853
08/23/2011	1	0.028	0.01	0.003	0.004	0.003	0.001	0.005	0.008	0.002	0.001	0.014	298.588	0.828	2.40525
08/23/2011	2	0.026	0.012	0.003	0.004	0.003	0.002	0.006	0.009	0.001	0.001	0.015	298.182	0.866	3.08669
08/23/2011	3	0.023	0.013	0.003	0.004	0.004	0.002	0.006	0.009	0.002	0.001	0.016	298.038	0.856	3.04583
08/23/2011	4	0.023	0.014	0.003	0.004	0.004	0.001	0.006	0.009	0.004	0.001	0.017	297.871	0.855	2.18799
08/23/2011	5	0.022	0.015	0.002	0.004	0.004	0.001	0.006	0.008	0.005	0.001	0.017	297.711	0.845	1.98036
08/23/2011	6	0.022	0.016	0.002	0.004	0.004	0.001	0.006	0.008	0.005	0.001	0.017	297.845	0.797	1.90495
08/23/2011	7	0.023	0.014	0.002	0.004	0.004	0.001	0.007	0.008	0.004	0.001	0.017	297.788	0.821	2.03186
08/23/2011	8	0.025	0.013	0.005	0.004	0.005	0.001	0.007	0.008	0.003	0.001	0.016	300.171	0.765	2.29917
08/23/2011	9	0.026	0.019	0.01	0.003	0.004	0.001	0.007	0.008	0.003	0.001	0.016	302.353	0.655	1.93081
08/23/2011	10	0.029	0.042	0.012	0.002	0.004	0.001	0.005	0.006	0.008	0.001	0.015	303.806	0.597	1.77442
08/23/2011	11	0.026	0.055	0.012	0.001	0.003	0.001	0.004	0.004	0.015	0.001	0.015	305.665	0.505	1.72484
08/23/2011	12	0.017	0.088	0.015	0.001	0.002	0	0.002	0.002	0.026	0.001	0.018	307.079	0.449	1.49411
08/23/2011	13	0.01	0.095	0.018	0	0.001	0	0.002	0.002	0.032	0.001	0.02	308.486	0.397	-0.884469
08/23/2011	14	0.003	0.063	0.018	0	0.001	0	0.002	0.002	0.035	0	0.027	307.858	0.409	-0.640042
08/23/2011	15	0.001	0.034	0.015	0	0.001	0	0.002	0.002	0.038	0	0.032	306.847	0.448	-0.234477
08/23/2011	16	0.001	0.025	0.014	0	0.001	0	0.002	0.002	0.041	0	0.034	307.216	0.427	-0.243517
08/23/2011	17	0.003	0.021	0.012	0.001	0.001	0	0.002	0.002	0.046	0	0.033	307.561	0.376	-0.69278
08/23/2011	18	0.009	0.022	0.01	0.001	0.001	0	0.002	0.003	0.051	0	0.031	306.847	0.395	1.53723
08/23/2011	19	0.019	0.026	0.008	0.001	0.001	0.001	0.003	0.004	0.046	0	0.03	304.39	0.481	1.55776
08/23/2011	20	0.022	0.034	0.008	0.001	0.002	0.001	0.004	0.005	0.041	0.001	0.029	302.856	0.46	1.45803
08/23/2011	21	0.024	0.041	0.008	0.002	0.002	0.001	0.004	0.006	0.035	0.001	0.028	301.571	0.495	1.42284
08/23/2011	22	0.025	0.047	0.008	0.002	0.002	0.001	0.005	0.007	0.03	0.001	0.027	300.511	0.548	1.43872
08/23/2011	23	0.023	0.043	0.006	0.002	0.002	0.001	0.005	0.008	0.025	0.001	0.026	299.585	0.622	1.52077
08/23/2011	24	0.018	0.026	0.003	0.004	0.003	0.002	0.006	0.009	0.02	0.001	0.025	298.733	0.696	1.71417
08/24/2011	1	0.015	0.017	0.002	0.004	0.003	0.002	0.006	0.009	0.018	0.001	0.024	298.084	0.76	1.82061
08/24/2011	2	0.008	0.013	0.002	0.004	0.003	0.002	0.006	0.009	0.02	0.001	0.023	297.644	0.801	1.85207
08/24/2011	3	0.005	0.01	0.002	0.004	0.003	0.002	0.005	0.009	0.022	0.001	0.023	297.348	0.804	0.179538
08/24/2011	4	0.006	0.01	0.002	0.004	0.002	0.001	0.005	0.008	0.022	0.001	0.022	297.112	0.786	1.7528
08/24/2011	5	0.008	0.013	0.002	0.004	0.002	0.001	0.004	0.008	0.021	0.001	0.022	296.944	0.769	0.0980746
08/24/2011	6	0.008	0.017	0.003	0.004	0.002	0.001	0.004	0.007	0.022	0.001	0.022	296.673	0.761	1.61196
08/24/2011	7	0.01	0.019	0.003	0.003	0.002	0.001	0.004	0.007	0.021	0.001	0.022	296.552	0.759	1.62043
08/24/2011	8	0.011	0.018	0.004	0.003	0.003	0.001	0.004	0.007	0.019	0.001	0.021	298.208	0.707	1.6075
08/24/2011	9	0.017	0.026	0.009	0.002	0.003	0.001	0.004	0.007	0.02	0.002	0.021	300.646	0.629	1.5069
08/24/2011	10	0.022	0.034	0.013	0.001	0.003	0.001	0.003	0.005	0.022	0.001	0.02	303.135	0.55	1.48424
08/24/2011	11	0.017	0.039	0.018	0	0.002	0.001	0.002	0.003	0.026	0.001	0.019	305.841	0.458	-0.152665
08/24/2011	12	0.012	0.042	0.024	0	0.001	0	0.002	0.003	0.031	0.001	0.02	307.836	0.401	-1.02214
08/24/2011	13	0.007	0.04	0.026	0	0.001	0	0.001	0.002	0.033	0.001	0.02	309.495	0.367	-1.33209
08/24/2011	14	0.006	0.032	0.022	0	0.001	0	0.001	0.002	0.029	0	0.018	310.391	0.35	-1.31577
08/24/2011	15	0.006	0.026	0.019	0	0.001	0	0.001	0.002	0.026	0	0.016	310.028	0.355	-1.20948
08/24/2011	16	0.006	0.022	0.017	0	0.001	0	0.001	0.002	0.024	0	0.015	309.179	0.369	-1.15072
08/24/2011	17	0.006	0.02	0.016	0	0.001	0	0.001	0.002	0.023	0	0.014	308.024	0.388	-1.05106
08/24/2011	18	0.008	0.019	0.014	0	0.001	0	0.001	0.002	0.022	0	0.014	307.018	0.397	-0.841125
08/24/2011	19	0.011	0.019	0.013	0	0.001	0	0.001	0.002	0.022	0	0.014	305.789	0.412	-0.439654
08/24/2011	20	0.015	0.018	0.011	0	0.001	0	0.002	0.003	0.02	0	0.014	303.943	0.46	0.350855
08/24/2011	21	0.018	0.016	0.009	0	0.001	0.001	0.002	0.003	0.019	0	0.014	302.533	0.513	0.784687
08/24/2011	22	0.02	0.015	0.008	0	0.001	0.001	0.002	0.004	0.018	0	0.015	301.438	0.567	0.914867
08/24/2011	23	0.022	0.014	0.008	0	0.001	0.001	0.003	0.005	0.017	0	0.015	300.52	0.625	1.21192
08/24/2011	24	0.023	0.014	0.008	0	0.001	0.001	0.003	0.006	0.016	0	0.016	299.684	0.691	1.30678
08/25/2011	1	0.022	0.013	0.007	0	0.001	0.001	0.003	0.006	0.015	0	0.016	298.916	0.765	1.42086
08/25/2011	2	0.019	0.012	0.006	0.001	0.001	0.001	0.003	0.006	0.014	0	0.016	298.36	0.814	1.73099
08/25/2011	3	0.016	0.011	0.005	0.001	0.001	0.001	0.004	0.006	0.014	0	0.016	297.963	0.834	1.81902
08/25/2011	4	0.014	0.01	0.005	0.001	0.001	0.001	0.004	0.006	0.014	0.001	0.016	297.639	0.837	1.78354
08/25/2011	5	0.013	0.01	0.004	0.001	0.001	0.001	0.004	0.006	0.014	0.001	0.016	297.249	0.847	1.82121
08/25/2011	6	0.013	0.009	0.004	0.001	0.001	0.001	0.004	0.006	0.013	0.001	0.016	296.915	0.854	1.79902
08/25/2011	7	0.014	0.009	0.003	0.001	0.002	0.001	0.005	0.007	0.011	0	0.016	296.703	0.862	1.9521
08/25/2011	8	0.014	0.01	0.005	0.001	0.002	0.001	0.005	0.007	0.011	0.001	0.016	298.183	0.811	1.82243
08/25/2011	9	0.021	0.021	0.009	0	0.003	0.001	0.004	0.005	0.014	0.001	0.017	300.472	0.719	1.12581
08/25/2011	10	0.032	0.029	0.011	0	0.004	0.001	0.004	0.004	0.015	0.001	0.016	302.962	0.616	1.30707
08/25/2011	11	0.04	0.028	0.013	0	0.003	0.001	0.003	0.004	0.015	0	0.015	305.559	0.506	1.30435
08/25/2011	12	0.037	0.019	0.014	0	0.002	0.001	0.002	0.003	0.016	0	0.013	307.463	0.436	1.22232
08/25/2011	13	0.026	0.013	0.014	0	0.001	0	0.002	0.002	0.019	0	0.014	308.982	0.394	0.568847
08/25/2011	14	0.017	0.008	0.014	0	0.001	0	0.002	0.002	0.023	0	0.015	308.542	0.409	0.124676
08/25/2011	15	0.01	0.004	0.012	0	0.001	0	0.001	0.002	0.025	0	0.015	307.529	0.444	-0.303988
08/25/2011	16	0.008	0.002	0.009	0	0.001	0	0.001	0.002	0.025	0	0.015	307.417	0.448	-0.277956
08/25/2011	17	0.009	0.001	0.007	0	0.001	0	0.001	0.002	0.026	0	0.015	307.741	0.413	-0.0832274
08/25/2011	18	0.013	0.002	0.007	0	0.001	0	0.001	0.002	0.027	0	0.016	307.068	0.42	0.0954451
08/25/2011	19	0.017	0.002	0.007	0	0.001	0	0.002	0.002	0.028	0	0.017	305.066	0.497	0.415768
08/25/2011	20	0.017	0.002	0.007	0.001	0.001	0	0.002	0.002	0.029	0	0.018	303.33	0.526	1.51353
08/25/2011	21	0.016	0.003	0.008	0.001	0.001	0.001	0.003	0.002	0.03	0	0.02	302.092	0.551	1.52523
08/25/2011	22	0.016	0.003	0.009	0.001	0.001	0.001	0.003	0.003	0.031	0.001	0.021	301.148	0.584	1.45262
08/25/2011	23	0.017	0.004	0.01	0.001	0.002	0.001	0.004	0.004	0.03	0.001	0.022	300.366	0.627	1.4567
08/25/2011	24	0.018	0.005	0.011	0.001	0.002	0.001	0.004	0.005	0.029	0.001	0.023	299.664	0.682	1.45064
08/26/2011	1	0.018	0.007	0.012	0.001	0.002	0.001	0.004	0.006	0.028	0.001	0.024	299.047	0.742	1.46616
08/26/2011	2	0.021	0.009	0.012	0.001	0.002	0.001	0.005	0.007	0.027	0.001	0.025	298.608	0.787	1.5014
08/26/2011	3	0.022	0.011	0.012	0.001	0.003	0.002	0.006	0.008	0.025	0.001	0.026	298.31	0.811	1.5865
08/26/2011	4	0.024	0.014	0.013	0.001	0.003	0.002	0.007	0.009	0.024	0.002	0.027	298.023	0.829	1.67958
08/26/2011	5	0.026	0.015	0.014	0.001	0.003	0.002	0.007	0.01	0.023	0.002	0.028	297.732	0.844	1.74106
08/26/2011	6	0.027	0.016	0.014	0.001	0.003	0.002	0.007	0.01	0.024	0.002	0.028	297.438	0.86	1.84467
08/26/2011	7	0.027	0.016	0.014	0.001	0.003	0.002	0.008	0.01	0.024	0.002	0.028	297.25	0.883	1.96739
08/26/2011	8	0.021	0.014	0.013	0	0.003	0.002	0.007	0.009	0.025	0.002	0.027	298.89	0.833	1.38043
08/26/2011	9	0.013	0.02	0.017	0	0.002	0.001	0.005	0.006	0.031	0.001	0.025	301.473	0.731	0.217088
08/26/2011	10	0.009	0.021	0.018	0	0.002	0.001	0.003	0.004	0.035	0.001	0.024	303.751	0.649	-0.301662
08/26/2011	11	0.009	0.023	0.018	0	0.001	0.001	0.002	0.003	0.034	0	0.022	306.62	0.522	-0.531183
08/26/2011	12	0.013	0.025	0.014	0	0.001	0	0.002	0.003	0.027	0	0.018	308.414	0.468	-0.19954
08/26/2011	13	0.012	0.01	0.009	0	0.001	0	0.001	0.002	0.019	0	0.014	307.938	0.473	-0.252533
08/26/2011	14	0.009	0.002	0.006	0	0.001	0	0.001	0.002	0.014	0	0.01	306.552	0.517	0.0521015
08/26/2011	15	0.01	0	0.005	0.001	0.001	0	0.001	0.002	0.009	0	0.007	305.697	0.536	1.74485
08/26/2011	16	0.013	0	0.003	0.001	0.001	0	0.001	0.002	0.006	0	0.006	305.643	0.537	1.86745
08/26/2011	17	0.017	0	0.002	0.002	0.001	0	0.002	0.002	0.004	0	0.005	305.797	0.555	2.14777
08/26/2011	18	0.022	0.001	0.002	0.003	0.001	0	0.002	0.003	0.003	0	0.006	305.23	0.597	2.11388
08/26/2011	19	0.019	0.001	0.003	0.003	0.001	0.001	0.003	0.004	0.005	0.001	0.009	302.812	0.689	2.12273
08/26/2011	20	0.013	0.002	0.005	0.004	0.002	0.001	0.004	0.005	0.016	0.001	0.017	301.329	0.696	1.73796
08/26/2011	21	0.011	0.003	0.004	0.005	0.002	0.001	0.004	0.006	0.024	0.001	0.022	300.51	0.707	1.67913
08/26/2011	22	0.009	0.004	0.003	0.007	0.002	0.001	0.005	0.006	0.028	0.001	0.025	299.916	0.73	1.68053
08/26/2011	23	0.006	0.006	0.003	0.007	0.003	0.001	0.005	0.005	0.038	0.001	0.029	299.477	0.748	1.65291
08/26/2011	24	0.005	0.008	0.003	0.006	0.003	0.001	0.005	0.005	0.049	0.001	0.034	299.183	0.758	0.0789928
08/27/2011	1	0.005	0.007	0.003	0.006	0.003	0.001	0.004	0.004	0.052	0.001	0.035	298.951	0.764	0.0930551
08/27/2011	2	0.005	0.006	0.003	0.006	0.002	0.001	0.004	0.004	0.05	0.001	0.035	298.698	0.769	0.0748889
08/27/2011	3	0.004	0.006	0.003	0.005	0.002	0.001	0.004	0.004	0.048	0.001	0.034	298.285	0.781	0.0749662
08/27/2011	4	0.004	0.005	0.003	0.005	0.002	0.001	0.004	0.004	0.045	0.001	0.031	297.814	0.79	0.116847
08/27/2011	5	0.005	0.006	0.004	0.005	0.002	0.001	0.004	0.004	0.04	0.001	0.029	297.748	0.736	0.0264371
08/27/2011	6	0.007	0.01	0.006	0.004	0.003	0.001	0.004	0.004	0.034	0.002	0.025	296.969	0.752	1.4489
08/27/2011	7	0.007	0.011	0.006	0.004	0.003	0.001	0.004	0.004	0.031	0.002	0.024	296.146	0.776	1.45398
08/27/2011	8	0.007	0.014	0.008	0.004	0.003	0.001	0.004	0.005	0.031	0.003	0.024	297.161	0.733	1.3959
08/27/2011	9	0.009	0.022	0.013	0.003	0.003	0.001	0.004	0.005	0.034	0.003	0.026	299.126	0.666	1.32616
08/27/2011	10	0.011	0.05	0.021	0.002	0.003	0.001	0.003	0.005	0.044	0.004	0.03	301.466	0.584	1.23139
08/27/2011	11	0.008	0.067	0.03	0.002	0.002	0.001	0.003	0.005	0.054	0.003	0.035	303.831	0.483	1.20534
08/27/2011	12	0.006	0.075	0.038	0.001	0.002	0.001	0.002	0.004	0.061	0.002	0.038	306.247	0.409	1.24021
08/27/2011	13	0.007	0.077	0.034	0.001	0.002	0.001	0.002	0.004	0.057	0.001	0.035	308.22	0.354	1.38098
08/27/2011	14	0.009	0.081	0.028	0.001	0.001	0.001	0.002	0.004	0.05	0.001	0.031	309.144	0.328	1.50207
08/27/2011	15	0.018	0.082	0.024	0.001	0.001	0.001	0.002	0.004	0.041	0.001	0.027	308.86	0.326	1.53001
08/27/2011	16	0.028	0.073	0.02	0.001	0.001	0.001	0.002	0.004	0.03	0.001	0.021	308.249	0.331	1.56335
08/27/2011	17	0.035	0.067	0.018	0.001	0.001	0.001	0.002	0.004	0.024	0.001	0.018	307.237	0.343	1.54702
08/27/2011	18	0.045	0.069	0.016	0.002	0.001	0.001	0.002	0.004	0.022	0.001	0.018	306.044	0.365	1.49615
08/27/2011	19	0.052	0.078	0.011	0.003	0.002	0.001	0.003	0.006	0.024	0.002	0.021	304.411	0.402	1.47816
08/27/2011	20	0.054	0.089	0.007	0.004	0.002	0.001	0.003	0.007	0.027	0.002	0.025	303.147	0.407	1.44935
08/27/2011	21	0.058	0.101	0.008	0.004	0.002	0.001	0.004	0.008	0.03	0.002	0.027	302.046	0.42	1.38573
08/27/2011	22	0.055	0.108	0.009	0.004	0.002	0.001	0.004	0.008	0.03	0.002	0.028	300.83	0.455	1.31792
08/27/2011	23	0.048	0.116	0.01	0.003	0.002	0.001	0.005	0.009	0.029	0.002	0.028	299.803	0.485	1.29939
08/27/2011	24	0.038	0.117	0.007	0.003	0.002	0.001	0.005	0.009	0.028	0.002	0.028	298.859	0.519	1.29398
08/28/2011	1	0.028	0.111	0.006	0.003	0.002	0.001	0.006	0.01	0.028	0.002	0.029	297.91	0.557	1.36501
08/28/2011	2	0.022	0.1	0.005	0.002	0.002	0.001	0.006	0.01	0.028	0.002	0.029	297.02	0.599	1.40854
08/28/2011	3	0.021	0.092	0.005	0.002	0.003	0.001	0.006	0.01	0.027	0.002	0.03	296.452	0.619	1.37228
08/28/2011	4	0.022	0.094	0.006	0.002	0.003	0.001	0.007	0.011	0.027	0.002	0.03	295.748	0.648	1.36943
08/28/2011	5	0.027	0.11	0.009	0.002	0.003	0.002	0.007	0.012	0.027	0.003	0.031	295.077	0.676	1.49466
[truncated: 67 more rows]

## Sheet: CMAQ_2001_NO_CRUST
CENTVIL	32.9029	-87.2497
Date	Hour	NH3	SO2	HNO3	CL	NA	MG	K	CA	NH4	NO3	SO4	T	RH
Alabama local	1-24hr	umol/m3	umol/m3	umol/m3	umol/m3	umol/m3	umol/m3	umol/m3	umol/m3	umol/m3	umol/m3	umol/m3	K		pH
2011-02-06	1	0.04	0.05	0.008	0.004	0.003	0.002	0.006	0.013	0.062	0.002	0.05	297.431	0.808	0.653178
2011-02-06	2	0.048	0.052	0.007	0.003	0.003	0.002	0.007	0.014	0.058	0.003	0.049	297.023	0.84	0.98809
2011-02-06	3	0.051	0.055	0.007	0.003	0.004	0.002	0.007	0.015	0.054	0.003	0.048	296.787	0.852	1.05288
2011-02-06	4	0.051	0.056	0.006	0.003	0.004	0.002	0.008	0.015	0.05	0.003	0.047	296.615	0.858	1.02835
2011-02-06	5	0.049	0.054	0.006	0.003	0.004	0.002	0.008	0.015	0.047	0.003	0.046	296.459	0.865	0.956061
2011-02-06	6	0.049	0.05	0.005	0.003	0.004	0.002	0.008	0.015	0.044	0.003	0.045	296.365	0.868	0.913179
2011-02-06	7	0.049	0.046	0.008	0.003	0.005	0.002	0.009	0.015	0.042	0.003	0.044	297.201	0.871	0.899352
2011-02-06	8	0.04	0.041	0.016	0.002	0.005	0.002	0.009	0.015	0.043	0.003	0.043	300.374	0.78	0.668086
2011-02-06	9	0.038	0.094	0.032	0.001	0.004	0.002	0.007	0.01	0.063	0.003	0.047	302.31	0.694	0.436572
2011-02-06	10	0.014	0.105	0.048	0	0.003	0.001	0.004	0.005	0.084	0.002	0.05	304.306	0.603	0.543806
2011-02-06	11	0.004	0.066	0.041	0	0.002	0.001	0.003	0.003	0.067	0.001	0.045	306.134	0.529	-0.215574
2011-02-06	12	0.003	0.054	0.038	0	0.002	0.001	0.003	0.003	0.062	0.001	0.045	307.836	0.468	0.0888836
2011-02-06	13	0.002	0.056	0.037	0	0.002	0	0.002	0.003	0.061	0.001	0.047	310.087	0.395	0.522662
2011-02-06	14	0.001	0.032	0.031	0	0.001	0	0.002	0.002	0.054	0.001	0.053	307.468	0.44	0.822919
2011-02-06	15	0	0.009	0.018	0	0.001	0	0.001	0.002	0.048	0.001	0.059	305.3	0.53	-0.431324
2011-02-06	16	0	0.005	0.01	0.001	0.001	0	0.001	0.002	0.056	0	0.069	306.182	0.528	-0.433551
2011-02-06	17	0	0.009	0.013	0.001	0.001	0	0.002	0.002	0.066	0	0.079	306.981	0.471	-0.457315
2011-02-06	18	0	0.016	0.016	0.001	0.001	0	0.002	0.002	0.069	0	0.088	306.139	0.519	-0.488836
2011-02-06	19	0	0.021	0.016	0.001	0.001	0	0.002	0.002	0.075	0	0.097	304.488	0.557	-0.463245
2011-02-06	20	0	0.027	0.016	0.001	0.001	0	0.002	0.002	0.084	0	0.107	302.434	0.567	-0.439412
2011-02-06	21	0	0.032	0.017	0.002	0.002	0	0.003	0.002	0.092	0	0.113	301.15	0.574	-0.396517
2011-02-06	22	0	0.037	0.019	0.001	0.002	0	0.004	0.002	0.098	0	0.115	300.233	0.601	-0.303076
2011-02-06	23	0	0.04	0.021	0.001	0.002	0	0.004	0.002	0.102	0	0.114	299.397	0.645	-0.190067
2011-02-06	24	0.001	0.042	0.021	0.001	0.002	0.001	0.005	0.002	0.105	0	0.111	298.592	0.705	-0.0850519
2011-03-06	1	0.001	0.042	0.02	0.001	0.002	0.001	0.005	0.002	0.107	0	0.107	297.763	0.785	-0.0271551
2011-03-06	2	0.001	0.036	0.016	0.001	0.002	0.001	0.005	0.002	0.107	0.001	0.101	297.198	0.838	0.044778
2011-03-06	3	0.001	0.028	0.012	0.001	0.002	0.001	0.004	0.003	0.108	0.001	0.095	296.937	0.852	0.0915105
2011-03-06	4	0.002	0.023	0.009	0.001	0.003	0.001	0.004	0.003	0.109	0.001	0.087	296.834	0.846	0.136357
2011-03-06	5	0.002	0.017	0.006	0.001	0.003	0.001	0.004	0.003	0.109	0.001	0.08	296.759	0.835	0.133965
2011-03-06	6	0.003	0.012	0.004	0.001	0.003	0.001	0.004	0.003	0.105	0.001	0.072	296.574	0.853	0.19433
2011-03-06	7	0.003	0.011	0.004	0.001	0.003	0.001	0.003	0.003	0.102	0	0.068	297.472	0.852	0.24678
2011-03-06	8	0.003	0.016	0.006	0.001	0.003	0.001	0.003	0.003	0.091	0	0.063	300.215	0.747	-0.00199917
2011-03-06	9	0.001	0.056	0.018	0.001	0.003	0.001	0.002	0.003	0.053	0.001	0.045	302.54	0.659	0.205865
2011-03-06	10	0.001	0.074	0.029	0	0.002	0	0.002	0.003	0.036	0.001	0.035	304.637	0.58	0.381097
2011-03-06	11	0.001	0.086	0.034	0	0.002	0	0.001	0.003	0.033	0.001	0.037	307.051	0.489	-0.194058
2011-03-06	12	0	0.111	0.04	0	0.001	0	0.001	0.002	0.034	0.001	0.049	309.253	0.416	-0.707917
2011-03-06	13	0	0.064	0.032	0	0.001	0	0.001	0.002	0.032	0	0.056	306.985	0.483	-0.734076
2011-03-06	14	0	0.028	0.022	0	0.001	0	0.001	0.002	0.035	0	0.062	307.331	0.45	-0.769315
2011-03-06	15	0	0.016	0.019	0	0.001	0	0.001	0.001	0.038	0	0.064	308.784	0.408	-0.793736
2011-03-06	16	0	0.009	0.015	0.001	0.001	0	0.001	0.001	0.04	0	0.059	306.083	0.503	-0.63417
2011-03-06	17	0	0.004	0.011	0.001	0.001	0	0.001	0.001	0.043	0	0.05	305.923	0.456	-0.416309
2011-03-06	18	0.001	0.004	0.009	0.001	0.001	0	0.001	0.001	0.054	0	0.045	306.065	0.448	0.584843
2011-03-06	19	0.003	0.004	0.009	0.001	0.001	0	0.001	0.001	0.068	0	0.044	304.308	0.497	-0.464124
2011-03-06	20	0.004	0.005	0.009	0.001	0.001	0	0.001	0.001	0.072	0	0.045	302.108	0.531	-0.440423
2011-03-06	21	0.003	0.009	0.009	0.002	0.001	0	0.001	0.001	0.072	0	0.046	300.93	0.542	-0.562164
2011-03-06	22	0.003	0.016	0.011	0.002	0.001	0	0.001	0.001	0.074	0	0.047	299.92	0.589	-0.4419
2011-03-06	23	0.004	0.02	0.011	0.001	0.001	0	0.001	0.001	0.076	0	0.047	299.08	0.656	-0.181782
2011-03-06	24	0.005	0.02	0.011	0.001	0.001	0	0.002	0.001	0.08	0	0.046	298.31	0.733	0.254182
2011-04-06	1	0.011	0.018	0.01	0.001	0.001	0	0.002	0.001	0.079	0.001	0.043	297.602	0.813	0.706991
2011-04-06	2	0.017	0.016	0.009	0.001	0.001	0.001	0.002	0.002	0.069	0.001	0.038	297.114	0.858	1.10962
2011-04-06	3	0.019	0.015	0.009	0.001	0.002	0.001	0.002	0.002	0.059	0.001	0.034	296.851	0.867	1.14606
2011-04-06	4	0.022	0.017	0.009	0.001	0.002	0.001	0.003	0.002	0.048	0.001	0.029	296.648	0.871	1.20934
2011-04-06	5	0.025	0.019	0.008	0.001	0.002	0.001	0.004	0.003	0.038	0.001	0.026	296.413	0.879	1.22686
2011-04-06	6	0.026	0.022	0.008	0.001	0.003	0.001	0.005	0.004	0.033	0.001	0.024	296.455	0.858	1.1356
2011-04-06	7	0.026	0.023	0.011	0.001	0.003	0.001	0.006	0.004	0.03	0.001	0.024	297.176	0.862	1.00872
2011-04-06	8	0.027	0.031	0.022	0.001	0.004	0.001	0.007	0.005	0.029	0.002	0.026	299.54	0.797	0.56465
2011-04-06	9	0.044	0.088	0.042	0.001	0.005	0.001	0.008	0.006	0.036	0.003	0.03	302.067	0.692	0.740539
2011-04-06	10	0.027	0.123	0.057	0	0.003	0.001	0.006	0.004	0.047	0.002	0.032	304.612	0.581	0.238743
2011-04-06	11	0.004	0.119	0.066	0	0.002	0	0.003	0.002	0.045	0.001	0.031	306.57	0.492	-0.256655
2011-04-06	12	0.001	0.076	0.05	0	0.001	0	0.002	0.001	0.031	0	0.03	306.974	0.482	0.732123
2011-04-06	13	0	0.049	0.033	0.001	0.001	0	0.002	0.001	0.025	0	0.032	306.327	0.502	-0.515412
2011-04-06	14	0	0.032	0.02	0.001	0.001	0	0.002	0.001	0.029	0	0.035	307.49	0.456	-0.482704
2011-04-06	15	0.001	0.03	0.019	0.001	0.001	0	0.002	0.001	0.04	0	0.04	308.873	0.404	0.9599
2011-04-06	16	0.001	0.054	0.028	0.001	0.001	0	0.002	0.001	0.051	0	0.04	309.455	0.368	0.663901
2011-04-06	17	0.002	0.034	0.021	0.001	0.001	0	0.002	0.001	0.058	0	0.04	305.339	0.527	-0.170036
2011-04-06	18	0.004	0.02	0.012	0.001	0.001	0	0.002	0.001	0.062	0	0.041	304.318	0.589	-0.214016
2011-04-06	19	0.006	0.024	0.012	0.001	0.001	0	0.002	0.002	0.073	0	0.043	303.185	0.62	0.0983239
2011-04-06	20	0.014	0.029	0.012	0.002	0.001	0	0.002	0.002	0.073	0.001	0.041	301.224	0.603	0.2037
2011-04-06	21	0.018	0.027	0.008	0.002	0.002	0.001	0.003	0.003	0.068	0.001	0.04	299.912	0.595	0.262842
2011-04-06	22	0.017	0.025	0.006	0.003	0.002	0.001	0.004	0.005	0.063	0.001	0.04	299.793	0.555	-0.00474928
2011-04-06	23	0.018	0.028	0.005	0.004	0.002	0.001	0.004	0.007	0.057	0.001	0.04	298.724	0.633	0.105418
2011-04-06	24	0.023	0.029	0.005	0.004	0.003	0.002	0.005	0.008	0.053	0.001	0.04	297.977	0.722	0.403552
2011-05-06	1	0.025	0.027	0.005	0.004	0.003	0.002	0.006	0.009	0.049	0.001	0.04	297.526	0.764	0.339829
2011-05-06	2	0.028	0.027	0.004	0.003	0.003	0.002	0.007	0.011	0.045	0.001	0.039	296.96	0.831	0.600307
2011-05-06	3	0.03	0.029	0.004	0.003	0.004	0.002	0.008	0.012	0.041	0.002	0.039	296.686	0.856	0.580829
2011-05-06	4	0.03	0.032	0.004	0.003	0.004	0.002	0.01	0.013	0.037	0.002	0.039	296.464	0.866	0.458066
2011-05-06	5	0.03	0.038	0.005	0.003	0.005	0.002	0.011	0.013	0.035	0.002	0.04	296.29	0.871	0.355254
2011-05-06	6	0.029	0.045	0.005	0.003	0.005	0.002	0.012	0.014	0.034	0.003	0.041	296.216	0.872	0.284835
2011-05-06	7	0.028	0.053	0.008	0.003	0.006	0.002	0.012	0.015	0.034	0.003	0.042	297.107	0.848	0.2059
2011-05-06	8	0.034	0.1	0.021	0.002	0.006	0.002	0.012	0.015	0.043	0.004	0.045	299.529	0.761	0.126233
2011-05-06	9	0.038	0.215	0.039	0.001	0.005	0.002	0.008	0.01	0.072	0.004	0.053	301.987	0.661	0.305034
2011-05-06	10	0.016	0.201	0.045	0	0.003	0.001	0.005	0.006	0.083	0.001	0.053	304.848	0.544	0.0634346
2011-05-06	11	0.004	0.178	0.043	0	0.002	0.001	0.004	0.004	0.075	0	0.051	306.951	0.457	-0.217308
2011-05-06	12	0.002	0.127	0.036	0	0.001	0	0.003	0.003	0.064	0	0.048	308.64	0.402	0.351865
2011-05-06	13	0.001	0.094	0.031	0	0.001	0	0.003	0.002	0.054	0	0.045	310.444	0.349	1.01301
2011-05-06	14	0.001	0.056	0.028	0	0.001	0	0.003	0.002	0.048	0	0.045	310.285	0.338	1.44395
2011-05-06	15	0.001	0.035	0.026	0	0.001	0	0.003	0.002	0.051	0	0.047	308.763	0.376	1.15847
2011-05-06	16	0.001	0.021	0.022	0	0.001	0	0.004	0.002	0.061	0	0.049	306.379	0.433	0.518594
2011-05-06	17	0.004	0.022	0.019	0	0.002	0	0.004	0.002	0.074	0	0.049	307.691	0.368	-0.325464
2011-05-06	18	0.008	0.037	0.022	0	0.002	0	0.004	0.002	0.079	0	0.049	307.153	0.355	-0.432461
2011-05-06	19	0.005	0.048	0.017	0	0.002	0	0.004	0.002	0.086	0	0.048	305.953	0.366	-0.127112
2011-05-06	20	0.007	0.028	0.008	0.001	0.002	0	0.004	0.003	0.086	0	0.049	300.78	0.507	0.0121889
2011-05-06	21	0.009	0.016	0.006	0.002	0.002	0.001	0.005	0.004	0.084	0	0.05	299.128	0.564	-0.0714782
2011-05-06	22	0.013	0.011	0.005	0.003	0.003	0.001	0.007	0.005	0.081	0	0.051	298.704	0.562	-0.149294
2011-05-06	23	0.019	0.012	0.005	0.004	0.004	0.001	0.009	0.006	0.079	0.001	0.052	297.243	0.65	0.17722
2011-05-06	24	0.03	0.017	0.005	0.004	0.005	0.001	0.01	0.007	0.077	0.001	0.054	296.522	0.713	0.888562
2011-06-06	1	0.04	0.021	0.005	0.004	0.005	0.002	0.012	0.008	0.073	0.001	0.054	295.769	0.806	0.812106
2011-06-06	2	0.045	0.025	0.004	0.004	0.006	0.002	0.013	0.01	0.068	0.002	0.055	295.245	0.863	0.922013
2011-06-06	3	0.041	0.027	0.004	0.004	0.006	0.002	0.014	0.012	0.064	0.002	0.055	294.869	0.887	0.882635
2011-06-06	4	0.035	0.031	0.005	0.004	0.006	0.002	0.015	0.013	0.061	0.003	0.055	294.616	0.895	0.595997
2011-06-06	5	0.029	0.035	0.005	0.004	0.007	0.002	0.015	0.014	0.062	0.003	0.056	294.394	0.894	0.408902
2011-06-06	6	0.025	0.039	0.006	0.004	0.007	0.002	0.015	0.014	0.064	0.003	0.058	294.218	0.886	0.330522
2011-06-06	7	0.023	0.041	0.01	0.004	0.007	0.002	0.015	0.014	0.066	0.004	0.059	295.022	0.889	0.323807
2011-06-06	8	0.02	0.049	0.021	0.003	0.007	0.002	0.015	0.014	0.07	0.004	0.06	298.127	0.766	-0.0253521
2011-06-06	9	0.019	0.114	0.043	0.001	0.006	0.002	0.012	0.011	0.085	0.004	0.063	300.552	0.66	-0.189411
2011-06-06	10	0.006	0.161	0.048	0.001	0.004	0.001	0.008	0.007	0.081	0.002	0.057	303.206	0.53	-0.441663
2011-06-06	11	0.002	0.178	0.048	0	0.003	0.001	0.006	0.004	0.063	0.001	0.049	305.513	0.425	0.301242
2011-06-06	12	0.002	0.146	0.046	0	0.003	0.001	0.006	0.003	0.06	0.001	0.048	307.425	0.358	0.61254
2011-06-06	13	0.001	0.118	0.045	0	0.002	0	0.006	0.003	0.065	0	0.052	309.388	0.298	0.966661
2011-06-06	14	0.001	0.097	0.043	0	0.002	0	0.006	0.003	0.068	0	0.054	310.515	0.265	1.12505
2011-06-06	15	0.002	0.082	0.04	0	0.002	0	0.005	0.003	0.068	0	0.053	310.491	0.26	0.987252
2011-06-06	16	0.003	0.079	0.037	0	0.002	0	0.005	0.003	0.065	0	0.049	310.078	0.265	0.648934
2011-06-06	17	0.005	0.083	0.035	0	0.002	0	0.005	0.003	0.065	0	0.046	309.257	0.276	0.0245109
2011-06-06	18	0.009	0.09	0.031	0	0.002	0.001	0.006	0.004	0.069	0	0.044	308.095	0.308	-0.472355
2011-06-06	19	0.022	0.09	0.02	0.001	0.003	0.001	0.006	0.004	0.068	0.001	0.043	305.599	0.389	-0.243403
2011-06-06	20	0.038	0.086	0.014	0.002	0.003	0.001	0.007	0.006	0.063	0.001	0.043	302.734	0.385	0.109902
2011-06-06	21	0.051	0.088	0.011	0.003	0.003	0.001	0.008	0.007	0.059	0.001	0.044	300.909	0.399	0.316901
2011-06-06	22	0.053	0.093	0.009	0.004	0.004	0.002	0.01	0.009	0.055	0.001	0.045	299.605	0.438	0.346723
2011-06-06	23	0.049	0.094	0.007	0.004	0.004	0.002	0.011	0.011	0.052	0.001	0.046	298.378	0.527	0.302172
2011-06-06	24	0.041	0.092	0.005	0.005	0.005	0.002	0.011	0.013	0.049	0.002	0.047	297.42	0.625	0.267127
2011-07-06	1	0.031	0.099	0.004	0.005	0.005	0.002	0.011	0.013	0.05	0.002	0.048	296.65	0.695	-0.160615
2011-07-06	2	0.021	0.096	0.003	0.005	0.005	0.002	0.01	0.013	0.051	0.002	0.048	296.14	0.733	-0.239124
2011-07-06	3	0.011	0.092	0.003	0.005	0.004	0.002	0.009	0.012	0.058	0.002	0.047	295.919	0.742	-0.207091
2011-07-06	4	0.007	0.09	0.004	0.005	0.004	0.002	0.007	0.011	0.061	0.001	0.046	295.804	0.743	-0.21434
2011-07-06	5	0.005	0.082	0.004	0.005	0.004	0.002	0.005	0.009	0.061	0.001	0.045	295.753	0.74	-0.214707
2011-07-06	6	0.004	0.067	0.004	0.004	0.003	0.001	0.004	0.008	0.059	0.001	0.043	295.773	0.738	-0.213415
2011-07-06	7	0.004	0.045	0.004	0.004	0.003	0.001	0.004	0.007	0.058	0.001	0.042	296.5	0.758	-0.112648
2011-07-06	8	0.005	0.027	0.006	0.003	0.003	0.001	0.004	0.007	0.057	0.001	0.039	299.752	0.661	-0.271349
2011-07-06	9	0.003	0.026	0.013	0.002	0.002	0.001	0.003	0.004	0.043	0.001	0.033	302.083	0.582	-0.102229
2011-07-06	10	0.001	0.032	0.022	0.001	0.002	0.001	0.002	0.002	0.033	0.001	0.028	304.184	0.517	0.413621
2011-07-06	11	0.001	0.022	0.022	0	0.001	0	0.001	0.001	0.026	0.001	0.024	306.374	0.453	0.797421
2011-07-06	12	0.001	0.014	0.02	0	0.001	0	0.001	0.001	0.021	0	0.02	307.988	0.41	1.01866
2011-07-06	13	0	0.007	0.016	0	0.001	0	0.001	0.001	0.018	0	0.02	306.804	0.436	-0.324864
2011-07-06	14	0	0.003	0.01	0	0	0	0.001	0.001	0.017	0	0.018	306.419	0.45	-0.108795
2011-07-06	15	0.001	0.002	0.008	0.001	0.001	0	0.001	0.001	0.023	0	0.02	307.113	0.426	0.721382
2011-07-06	16	0.002	0.002	0.005	0.001	0.001	0	0.001	0.001	0.026	0	0.019	305.158	0.502	-0.152039
2011-07-06	17	0.004	0.001	0.004	0.001	0.001	0	0.001	0.001	0.032	0	0.019	306.346	0.468	0.0841486
2011-07-06	18	0.004	0.002	0.005	0.001	0.001	0	0.001	0.001	0.038	0	0.021	305.676	0.437	1.30206
2011-07-06	19	0.007	0.002	0.005	0.001	0.001	0	0.001	0.001	0.04	0	0.022	303.638	0.461	-0.250582
2011-07-06	20	0.01	0.002	0.004	0.002	0.001	0	0.002	0.001	0.041	0	0.023	301.913	0.388	-0.237555
2011-07-06	21	0.014	0.003	0.004	0.003	0.002	0	0.002	0.001	0.042	0	0.024	300.619	0.388	-0.0768481
2011-07-06	22	0.013	0.004	0.005	0.003	0.002	0	0.002	0.001	0.043	0	0.025	299.531	0.43	-0.0595426
2011-07-06	23	0.011	0.005	0.006	0.002	0.002	0	0.002	0.001	0.044	0	0.026	298.646	0.492	-0.072666
2011-07-06	24	0.01	0.006	0.006	0.002	0.002	0	0.002	0.001	0.045	0	0.026	297.839	0.57	0.0674165
2011-08-06	1	0.011	0.007	0.005	0.002	0.002	0.001	0.002	0.002	0.045	0	0.027	297.104	0.656	0.197831
2011-08-06	2	0.013	0.007	0.005	0.002	0.002	0.001	0.003	0.002	0.044	0	0.027	296.567	0.717	0.379753
2011-08-06	3	0.014	0.007	0.004	0.002	0.002	0.001	0.003	0.002	0.043	0.001	0.027	296.214	0.751	0.456122
2011-08-06	4	0.015	0.007	0.004	0.002	0.002	0.001	0.003	0.003	0.042	0.001	0.027	295.927	0.778	0.53819
2011-08-06	5	0.017	0.006	0.003	0.002	0.003	0.001	0.003	0.003	0.041	0.001	0.027	295.683	0.803	0.656768
2011-08-06	6	0.019	0.006	0.003	0.002	0.003	0.001	0.003	0.003	0.041	0.001	0.027	295.536	0.828	0.857801
2011-08-06	7	0.022	0.006	0.005	0.002	0.003	0.001	0.004	0.003	0.04	0.001	0.027	296.468	0.838	0.955043
2011-08-06	8	0.017	0.007	0.011	0.001	0.003	0.001	0.004	0.003	0.041	0.001	0.028	298.348	0.782	0.443573
2011-08-06	9	0.004	0.03	0.021	0.001	0.003	0.001	0.003	0.003	0.05	0.001	0.034	300.236	0.712	-0.0949072
2011-08-06	10	0.002	0.043	0.036	0	0.003	0.001	0.002	0.003	0.044	0.001	0.037	302.111	0.636	0.16656
2011-08-06	11	0	0.049	0.05	0	0.002	0	0.002	0.002	0.036	0.001	0.041	303.776	0.571	-0.25898
2011-08-06	12	0	0.04	0.045	0	0.001	0	0.001	0.002	0.029	0.001	0.039	305.3	0.522	-0.544039
2011-08-06	13	0	0.025	0.03	0	0.001	0	0.001	0.001	0.022	0	0.031	306.496	0.483	-0.625117
2011-08-06	14	0	0.015	0.021	0	0.001	0	0.001	0.001	0.018	0	0.027	306.787	0.474	-0.676352
2011-08-06	15	0	0.011	0.016	0	0.001	0	0.001	0.001	0.016	0	0.025	306.161	0.489	-0.676674
2011-08-06	16	0	0.017	0.015	0	0.001	0	0.001	0.001	0.016	0	0.025	305.16	0.52	-0.645899
2011-08-06	17	0	0.035	0.014	0	0.001	0	0.001	0.001	0.018	0	0.027	303.78	0.565	-0.582785
2011-08-06	18	0	0.055	0.013	0	0.001	0	0.001	0.001	0.02	0	0.031	302.318	0.613	-0.551367
2011-08-06	19	0	0.062	0.01	0.001	0.001	0	0.001	0.001	0.022	0	0.037	300.808	0.667	-0.529029
2011-08-06	20	0	0.056	0.008	0.001	0.001	0	0.001	0.001	0.026	0	0.051	299.173	0.723	-0.527785
2011-08-06	21	0	0.052	0.007	0.001	0.001	0	0.001	0.001	0.029	0	0.068	298.039	0.777	-0.492185
2011-08-06	22	0	0.047	0.006	0.001	0.001	0	0.001	0.001	0.03	0	0.083	297.272	0.816	-0.456213
2011-08-06	23	0	0.044	0.004	0.001	0.001	0	0.001	0.001	0.031	0	0.093	296.644	0.852	-0.41065
2011-08-06	24	0	0.05	0.004	0.001	0.001	0	0.001	0.001	0.031	0	0.093	296.07	0.893	-0.309847
2011-09-06	1	0	0.058	0.004	0	0.001	0	0.001	0.001	0.032	0	0.087	295.499	0.941	-0.0886285
2011-09-06	2	0	0.057	0.003	0	0.001	0	0.003	0.002	0.043	0	0.081	295.003	0.97	0.245072
2011-09-06	3	0	0.054	0.003	0	0.002	0	0.004	0.002	0.054	0	0.075	294.713	0.984	0.493951
2011-09-06	4	0.001	0.043	0.003	0	0.002	0	0.004	0.002	0.063	0	0.067	294.497	0.99	0.889455
2011-09-06	5	0.001	0.03	0.003	0.001	0.003	0	0.005	0.002	0.074	0	0.064	294.345	0.99	1.01701
2011-09-06	6	0.002	0.031	0.004	0	0.003	0	0.006	0.002	0.082	0	0.059	294.515	0.981	0.948521
2011-09-06	7	0.004	0.035	0.006	0	0.004	0	0.007	0.002	0.09	0	0.058	294.864	0.956	0.866186
2011-09-06	8	0.007	0.074	0.013	0.001	0.004	0	0.007	0.002	0.084	0.002	0.05	296.78	0.862	0.553684
2011-09-06	9	0.003	0.161	0.025	0	0.003	0	0.004	0.002	0.053	0	0.035	299.036	0.758	0.016695
2011-09-06	10	0.001	0.157	0.024	0	0.002	0	0.003	0.001	0.039	0	0.031	301.256	0.655	0.0730682
2011-09-06	11	0.001	0.141	0.02	0	0.001	0	0.002	0.001	0.027	0	0.027	303.216	0.571	0.333182
2011-09-06	12	0.001	0.096	0.017	0	0.001	0	0.002	0.001	0.023	0	0.024	305.155	0.491	0.351941
2011-09-06	13	0.001	0.06	0.015	0	0.001	0	0.001	0.001	0.022	0	0.021	306.771	0.433	0.911504
2011-09-06	14	0.001	0.046	0.015	0	0.001	0	0.001	0.001	0.024	0	0.021	307.544	0.412	0.812586
2011-09-06	15	0.001	0.023	0.014	0	0.001	0	0.001	0.001	0.024	0	0.024	305.063	0.488	0.601201
2011-09-06	16	0.001	0.009	0.01	0	0.001	0	0.001	0.001	0.027	0	0.025	303.707	0.552	0.463421
2011-09-06	17	0.002	0.007	0.009	0.001	0.001	0	0.002	0.001	0.031	0	0.023	304.165	0.556	-0.0769839
2011-09-06	18	0.006	0.011	0.007	0.001	0.001	0	0.003	0.001	0.038	0	0.023	304.135	0.579	0.30805
2011-09-06	19	0.014	0.019	0.007	0.001	0.001	0	0.003	0.001	0.037	0	0.022	303.518	0.601	0.161006
2011-09-06	20	0.023	0.025	0.008	0.001	0.002	0	0.004	0.002	0.036	0	0.023	302.031	0.567	0.349323
2011-09-06	21	0.032	0.031	0.009	0.001	0.002	0	0.005	0.002	0.037	0	0.025	300.747	0.556	0.517331
2011-09-06	22	0.04	0.036	0.01	0.001	0.002	0.001	0.006	0.003	0.037	0	0.026	299.675	0.59	0.713551
2011-09-06	23	0.046	0.04	0.01	0.001	0.003	0.001	0.007	0.004	0.035	0.001	0.026	298.716	0.647	0.929836
2011-09-06	24	0.046	0.04	0.009	0.001	0.003	0.001	0.008	0.004	0.033	0.001	0.027	297.936	0.71	0.994643
2011-10-06	1	0.041	0.04	0.009	0.001	0.004	0.001	0.009	0.005	0.031	0.001	0.027	297.242	0.774	1.02578
2011-10-06	2	0.028	0.037	0.009	0.001	0.004	0.001	0.008	0.006	0.031	0.001	0.028	296.778	0.808	0.611017
2011-10-06	3	0.019	0.035	0.01	0.001	0.004	0.001	0.008	0.007	0.03	0.001	0.028	296.617	0.799	0.234296
2011-10-06	4	0.015	0.034	0.01	0.002	0.004	0.001	0.007	0.008	0.027	0.001	0.028	296.428	0.797	0.0172656
2011-10-06	5	0.015	0.038	0.01	0.002	0.004	0.002	0.007	0.01	0.023	0.001	0.028	296.247	0.8	0.0123903
2011-10-06	6	0.017	0.044	0.011	0.002	0.004	0.002	0.007	0.011	0.018	0.001	0.027	296.366	0.775	-0.0150561
2011-10-06	7	0.018	0.045	0.015	0.002	0.004	0.002	0.007	0.012	0.014	0.002	0.026	297.262	0.773	0.0287173
2011-10-06	8	0.017	0.048	0.029	0.001	0.004	0.002	0.007	0.012	0.014	0.002	0.026	299.99	0.701	0.105267
2011-10-06	9	0.012	0.147	0.046	0	0.004	0.001	0.005	0.008	0.036	0.001	0.031	301.915	0.623	-0.283878
2011-10-06	10	0.001	0.165	0.035	0	0.002	0	0.002	0.003	0.039	0	0.036	303.659	0.544	0.488884
2011-10-06	11	0	0.117	0.029	0	0.001	0	0.001	0.002	0.03	0	0.038	305.018	0.506	-0.493088
2011-10-06	12	0	0.062	0.022	0	0	0	0.001	0.001	0.023	0	0.041	304.352	0.541	-0.681578
2011-10-06	13	0	0.026	0.015	0	0	0	0	0.001	0.019	0	0.042	303.478	0.611	-0.672033
2011-10-06	14	0	0.019	0.011	0.001	0	0	0	0.001	0.018	0	0.04	304.022	0.624	-0.661648
2011-10-06	15	0	0.019	0.011	0.001	0	0	0	0.001	0.019	0	0.041	305.916	0.497	-0.772632
2011-10-06	16	0	0.022	0.013	0.001	0	0	0	0.001	0.018	0	0.04	305.924	0.471	-0.807577
2011-10-06	17	0	0.029	0.014	0	0	0	0	0.001	0.018	0	0.041	304.79	0.485	-0.793814
2011-10-06	18	0	0.039	0.012	0.001	0	0	0.001	0.001	0.022	0	0.041	303.3	0.518	-0.717745
2011-10-06	19	0	0.049	0.011	0.001	0	0	0.001	0.001	0.024	0	0.041	301.541	0.57	-0.638849
2011-10-06	20	0	0.058	0.009	0.001	0.001	0	0.001	0.001	0.026	0	0.041	299.719	0.607	-0.565365
2011-10-06	21	0	0.072	0.008	0.001	0.001	0	0.001	0.001	0.028	0	0.041	298.367	0.666	-0.466664
2011-10-06	22	0	0.081	0.008	0.001	0.001	0	0.001	0.001	0.03	0	0.04	297.873	0.675	-0.391278
2011-10-06	23	0	0.082	0.01	0.001	0.001	0	0.002	0.001	0.033	0	0.039	297.328	0.707	-0.251437
2011-10-06	24	0.001	0.083	0.016	0.001	0.001	0	0.002	0.001	0.037	0	0.038	296.9	0.748	-0.0541086
2011-11-06	1	0.001	0.088	0.026	0.001	0.002	0	0.002	0.001	0.041	0	0.037	296.447	0.8	0.0174511
2011-11-06	2	0.002	0.09	0.035	0	0.002	0.001	0.003	0.002	0.046	0	0.036	296.117	0.831	0.0790135
2011-11-06	3	0.003	0.09	0.04	0	0.003	0.001	0.004	0.003	0.051	0	0.035	295.834	0.848	0.18798
2011-11-06	4	0.006	0.09	0.038	0	0.003	0.001	0.004	0.003	0.053	0.001	0.035	295.594	0.857	0.324469
2011-11-06	5	0.012	0.092	0.032	0	0.004	0.001	0.005	0.004	0.049	0.002	0.034	295.351	0.863	0.443156
2011-11-06	6	0.015	0.097	0.026	0	0.004	0.001	0.006	0.004	0.045	0.002	0.032	295.281	0.861	0.575567
2011-11-06	7	0.018	0.111	0.031	0	0.005	0.001	0.007	0.004	0.042	0.002	0.031	295.767	0.859	0.668257
2011-11-06	8	0.033	0.168	0.045	0	0.005	0.001	0.006	0.004	0.042	0.003	0.03	297.92	0.785	0.969481
2011-11-06	9	0.047	0.215	0.038	0	0.004	0.001	0.004	0.003	0.044	0.002	0.028	300.462	0.688	1.01775
2011-11-06	10	0.039	0.21	0.037	0	0.002	0	0.002	0.002	0.046	0.001	0.027	303.406	0.569	0.665136
2011-11-06	11	0.021	0.177	0.044	0	0.001	0	0.001	0.001	0.047	0	0.026	306.077	0.468	0.170231
2011-11-06	12	0.005	0.082	0.036	0	0	0	0.001	0.001	0.039	0	0.022	307.962	0.412	-0.39622
2011-11-06	13	0.001	0.032	0.025	0	0	0	0.001	0	0.028	0	0.026	307.068	0.425	0.896756
2011-11-06	14	0	0.007	0.014	0	0	0	0	0	0.021	0	0.025	305.747	0.495	-0.41403
2011-11-06	15	0	0.002	0.008	0	0	0	0.001	0	0.021	0	0.024	306.621	0.471	-0.364878
2011-11-06	16	0	0.002	0.007	0	0	0	0.001	0	0.02	0	0.023	304.354	0.57	-0.27808
2011-11-06	17	0	0.002	0.006	0	0	0	0.001	0	0.017	0	0.02	302.537	0.675	-0.236507
2011-11-06	18	0	0.004	0.006	0	0	0	0.001	0	0.016	0	0.019	301.533	0.767	-0.180891
2011-11-06	19	0	0.016	0.007	0	0	0	0.001	0.001	0.018	0	0.024	300.768	0.795	-0.243814
2011-11-06	20	0	0.043	0.009	0.001	0.001	0	0.001	0.001	0.026	0	0.035	299.502	0.747	-0.319125
2011-11-06	21	0.001	0.054	0.008	0.001	0.001	0	0.001	0.001	0.037	0	0.04	298.169	0.764	-0.0898857
2011-11-06	22	0.001	0.061	0.008	0.001	0.001	0	0.002	0.001	0.048	0	0.041	297.185	0.79	0.0471717
2011-11-06	23	0.002	0.064	0.008	0.001	0.002	0	0.002	0.002	0.055	0	0.04	296.447	0.822	0.0723007
2011-11-06	24	0.004	0.062	0.008	0.001	0.002	0.001	0.003	0.003	0.057	0	0.037	295.876	0.855	0.324002
2011-12-06	1	0.011	0.056	0.007	0.001	0.003	0.001	0.004	0.004	0.049	0.001	0.032	295.363	0.89	0.783277
2011-12-06	2	0.013	0.049	0.008	0.001	0.003	0.001	0.005	0.005	0.04	0.001	0.029	294.992	0.91	0.768091
2011-12-06	3	0.012	0.045	0.009	0.001	0.003	0.001	0.005	0.005	0.033	0.001	0.027	294.712	0.917	0.609352
2011-12-06	4	0.011	0.046	0.012	0.001	0.004	0.001	0.005	0.006	0.029	0.001	0.026	294.484	0.921	0.48548
2011-12-06	5	0.012	0.05	0.014	0.001	0.004	0.001	0.005	0.006	0.027	0.002	0.025	294.274	0.924	0.493489
2011-12-06	6	0.014	0.052	0.016	0.001	0.004	0.001	0.005	0.007	0.025	0.002	0.025	294.192	0.924	0.488542
2011-12-06	7	0.018	0.054	0.021	0.001	0.004	0.001	0.005	0.007	0.025	0.003	0.024	295.097	0.924	0.686915
2011-12-06	8	0.018	0.049	0.033	0.001	0.004	0.001	0.005	0.007	0.025	0.003	0.024	297.68	0.833	0.392625
2011-12-06	9	0.004	0.215	0.073	0	0.004	0.001	0.003	0.005	0.031	0.001	0.025	299.654	0.753	0.00373798
2011-12-06	10	0.002	0.199	0.059	0	0.003	0	0.002	0.003	0.033	0	0.026	301.784	0.666	0.0299168
2011-12-06	11	0.002	0.181	0.054	0	0.002	0	0.001	0.002	0.037	0	0.027	303.598	0.583	-0.114797
2011-12-06	12	0.001	0.055	0.032	0	0.001	0	0.001	0.001	0.031	0	0.03	303.553	0.574	0.395535
2011-12-06	13	0.001	0.006	0.013	0	0	0	0.001	0.001	0.025	0	0.024	304.455	0.543	0.50681
2011-12-06	14	0.001	0.001	0.007	0	0	0	0	0.001	0.017	0	0.014	304.355	0.571	0.232521
2011-12-06	15	0.001	0	0.004	0.001	0	0	0	0	0.014	0	0.011	304.153	0.569	0.0761685
2011-12-06	16	0.002	0.001	0.004	0.001	0	0	0	0	0.013	0	0.01	305.453	0.498	-0.196954
2011-12-06	17	0.002	0.001	0.005	0.001	0	0	0	0	0.014	0	0.01	304.93	0.508	-0.374498
2011-12-06	18	0.002	0.001	0.004	0	0	0	0	0	0.015	0	0.009	304.061	0.519	0.0833557
2011-12-06	19	0.004	0.001	0.005	0	0	0	0.001	0	0.016	0	0.009	303.339	0.519	-0.35432
2011-12-06	20	0.012	0.002	0.005	0	0	0	0.001	0.001	0.016	0	0.009	301.147	0.579	0.257999
2011-12-06	21	0.02	0.003	0.005	0	0	0	0.001	0.001	0.016	0	0.009	299.463	0.62	0.623592
2011-12-06	22	0.023	0.003	0.005	0	0	0	0.001	0.001	0.017	0	0.01	298.179	0.668	0.802527
2011-12-06	23	0.022	0.004	0.006	0	0	0	0.001	0.001	0.019	0	0.011	297.152	0.724	0.926406
2011-12-06	24	0.021	0.005	0.006	0	0.001	0	0.001	0.001	0.021	0	0.012	296.294	0.786	1.09478
06/13/2011	1	0.019	0.006	0.007	0	0.001	0	0.001	0.001	0.022	0	0.013	295.56	0.852	1.23758
06/13/2011	2	0.019	0.008	0.008	0	0.001	0	0.002	0.001	0.024	0	0.015	295.084	0.888	1.3728
06/13/2011	3	0.018	0.009	0.009	0	0.001	0	0.002	0.002	0.025	0	0.016	294.838	0.897	1.36711
06/13/2011	4	0.017	0.012	0.01	0	0.002	0.001	0.002	0.003	0.027	0.001	0.018	294.681	0.896	1.25164
06/13/2011	5	0.017	0.015	0.012	0	0.002	0.001	0.003	0.004	0.028	0.001	0.02	294.568	0.893	1.05183
06/13/2011	6	0.018	0.018	0.014	0.001	0.003	0.001	0.004	0.004	0.028	0.001	0.022	294.569	0.886	0.870345
06/13/2011	7	0.022	0.022	0.02	0.001	0.003	0.001	0.005	0.005	0.028	0.001	0.023	295.581	0.878	0.925774
06/13/2011	8	0.023	0.024	0.034	0.001	0.004	0.001	0.005	0.006	0.028	0.002	0.024	298.714	0.79	0.496578
06/13/2011	9	0.011	0.142	0.084	0	0.004	0.001	0.004	0.006	0.032	0.001	0.027	300.97	0.695	-0.0966847
06/13/2011	10	0.002	0.249	0.081	0	0.003	0.001	0.002	0.003	0.032	0	0.03	303.211	0.592	0.360166
06/13/2011	11	0.001	0.142	0.055	0	0.001	0	0.001	0.002	0.023	0	0.023	304.673	0.522	0.506098
06/13/2011	12	0.001	0.076	0.036	0	0.001	0	0.001	0.001	0.018	0	0.018	306.395	0.461	0.773079
06/13/2011	13	0	0.038	0.026	0	0.001	0	0.001	0.001	0.018	0	0.018	308.68	0.391	0.601382
06/13/2011	14	0	0.018	0.02	0	0	0	0.001	0.001	0.02	0	0.019	309.744	0.36	1.32665
06/13/2011	15	0.001	0.012	0.017	0	0.001	0	0.001	0.002	0.023	0	0.019	309.229	0.372	0.769308
06/13/2011	16	0.002	0.012	0.015	0	0.001	0	0.001	0.002	0.023	0	0.019	308.48	0.401	0.515217
06/13/2011	17	0.003	0.012	0.013	0	0.001	0	0.001	0.002	0.023	0	0.017	307.266	0.439	-0.166004
06/13/2011	18	0.004	0.016	0.009	0.001	0.001	0	0.001	0.002	0.022	0	0.016	306.003	0.482	-0.360628
06/13/2011	19	0.006	0.016	0.006	0.001	0.001	0	0.001	0.002	0.022	0	0.015	304.331	0.56	0.0919633
06/13/2011	20	0.008	0.013	0.004	0.002	0.001	0.001	0.002	0.003	0.019	0	0.014	302.379	0.601	0.387749
06/13/2011	21	0.008	0.011	0.003	0.002	0.001	0.001	0.002	0.003	0.017	0	0.014	301.162	0.608	-0.101175
06/13/2011	22	0.007	0.009	0.002	0.003	0.001	0.001	0.002	0.004	0.016	0	0.014	299.92	0.646	-0.25083
06/13/2011	23	0.007	0.008	0.002	0.003	0.001	0.001	0.003	0.004	0.014	0	0.014	298.782	0.671	-0.373546
06/13/2011	24	0.009	0.007	0.003	0.003	0.001	0.001	0.003	0.005	0.013	0	0.014	297.924	0.701	-0.230951
06/14/2011	1	0.011	0.007	0.003	0.003	0.002	0.001	0.003	0.005	0.012	0.001	0.015	297.019	0.746	-0.0971587
06/14/2011	2	0.012	0.007	0.004	0.002	0.002	0.001	0.003	0.006	0.011	0.001	0.015	296.372	0.777	-0.038673
06/14/2011	3	0.013	0.008	0.004	0.002	0.002	0.001	0.004	0.006	0.01	0.001	0.015	295.994	0.789	-0.0149779
06/14/2011	4	0.016	0.009	0.004	0.002	0.002	0.001	0.004	0.007	0.01	0.001	0.015	295.714	0.799	0.193981
06/14/2011	5	0.02	0.011	0.005	0.001	0.002	0.001	0.004	0.007	0.009	0.001	0.015	295.489	0.808	0.727266
06/14/2011	6	0.026	0.014	0.006	0.001	0.002	0.001	0.004	0.008	0.008	0.001	0.015	295.361	0.816	0.665573
06/14/2011	7	0.033	0.016	0.009	0.001	0.002	0.001	0.005	0.008	0.006	0.001	0.015	296.248	0.827	0.939335
06/14/2011	8	0.027	0.017	0.014	0.001	0.002	0.001	0.005	0.008	0.006	0.001	0.015	298.858	0.763	0.357595
06/14/2011	9	0.016	0.085	0.052	0	0.003	0.001	0.003	0.006	0.019	0.002	0.019	301.31	0.66	0.131104
06/14/2011	10	0.004	0.163	0.056	0	0.002	0.001	0.002	0.003	0.032	0.001	0.024	303.73	0.555	-0.25337
06/14/2011	11	0.001	0.128	0.037	0	0.001	0	0.001	0.002	0.024	0	0.021	305.595	0.475	0.579483
06/14/2011	12	0.001	0.077	0.026	0	0.001	0	0.001	0.002	0.02	0	0.019	307.414	0.404	1.0345
06/14/2011	13	0.001	0.054	0.021	0	0.001	0	0.001	0.002	0.02	0	0.019	309.195	0.344	1.37151
06/14/2011	14	0.001	0.045	0.02	0	0.001	0	0.001	0.002	0.022	0	0.021	310.239	0.311	1.61739
06/14/2011	15	0.001	0.037	0.018	0	0.001	0	0.001	0.002	0.025	0	0.021	310.206	0.305	1.09394
06/14/2011	16	0.002	0.03	0.016	0	0.001	0	0.001	0.002	0.025	0	0.02	309.78	0.314	0.652089
06/14/2011	17	0.002	0.02	0.014	0	0.001	0	0.001	0.002	0.026	0	0.02	306.955	0.393	0.188792
06/14/2011	18	0.002	0.011	0.009	0.001	0.001	0	0.001	0.002	0.026	0	0.02	304.495	0.497	0.00269831
06/14/2011	19	0.004	0.01	0.007	0.001	0.001	0	0.001	0.002	0.029	0	0.02	304.072	0.456	-0.584805
06/14/2011	20	0.007	0.013	0.008	0.002	0.001	0	0.002	0.002	0.033	0	0.021	302.336	0.478	0.0238597
06/14/2011	21	0.016	0.017	0.01	0.001	0.001	0.001	0.002	0.003	0.032	0	0.021	300.942	0.487	-0.0119335
06/14/2011	22	0.023	0.022	0.013	0.001	0.001	0.001	0.003	0.003	0.031	0	0.021	299.894	0.515	0.291831
06/14/2011	23	0.028	0.025	0.016	0.001	0.001	0.001	0.003	0.003	0.031	0.001	0.021	298.764	0.587	0.598172
06/14/2011	24	0.026	0.025	0.017	0.001	0.001	0.001	0.003	0.003	0.034	0.001	0.022	297.538	0.693	0.782591
06/15/2011	1	0.019	0.023	0.015	0.001	0.001	0.001	0.003	0.003	0.038	0.001	0.024	296.413	0.808	0.885088
06/15/2011	2	0.01	0.021	0.012	0.001	0.001	0.001	0.003	0.002	0.045	0.001	0.027	295.837	0.861	0.68199
06/15/2011	3	0.004	0.02	0.009	0.001	0.002	0	0.003	0.002	0.051	0.001	0.029	295.697	0.859	0.716807
06/15/2011	4	0.004	0.017	0.007	0.001	0.002	0	0.002	0.002	0.052	0	0.031	295.448	0.881	0.611769
06/15/2011	5	0.004	0.014	0.006	0.001	0.002	0	0.002	0.001	0.053	0	0.032	295.362	0.888	0.61968
06/15/2011	6	0.004	0.011	0.005	0.001	0.002	0	0.002	0.001	0.054	0	0.032	295.231	0.908	0.778141
06/15/2011	7	0.004	0.009	0.004	0.001	0.002	0	0.002	0.001	0.058	0.001	0.032	296.386	0.886	1.01257
06/15/2011	8	0.004	0.009	0.005	0.001	0.002	0	0.002	0.001	0.056	0.001	0.031	298.593	0.838	0.870635
06/15/2011	9	0.003	0.025	0.011	0.001	0.003	0	0.002	0.001	0.046	0	0.031	300.779	0.738	0.00907187
06/15/2011	10	0.002	0.074	0.022	0	0.003	0	0.002	0.001	0.041	0	0.033	303.005	0.636	0.126366
06/15/2011	11	0.002	0.085	0.033	0	0.003	0	0.002	0.002	0.041	0	0.031	305.06	0.549	0.07102
06/15/2011	12	0.003	0.07	0.041	0	0.002	0	0.001	0.002	0.039	0.001	0.028	307.087	0.478	-0.0873414
06/15/2011	13	0	0.024	0.027	0	0.001	0	0.001	0.001	0.024	0	0.032	305.492	0.491	-0.569315
06/15/2011	14	0	0.003	0.01	0	0	0	0.001	0.001	0.014	0	0.026	306.427	0.458	-0.774193
06/15/2011	15	0	0.001	0.005	0.001	0	0	0	0	0.014	0	0.022	305.772	0.501	-0.669403
06/15/2011	16	0	0.001	0.003	0	0	0	0	0	0.013	0	0.018	305.412	0.495	-0.590652
06/15/2011	17	0	0	0.002	0	0	0	0	0	0.011	0	0.015	304.156	0.508	-0.56825
06/15/2011	18	0.001	0	0.002	0	0	0	0	0	0.015	0	0.013	303.036	0.591	0.256391
06/15/2011	19	0.001	0.001	0.002	0.001	0	0	0	0	0.018	0	0.015	302.281	0.498	0.250427
06/15/2011	20	0.002	0.003	0.002	0.002	0.001	0	0.001	0	0.027	0	0.018	300.357	0.572	-0.522961
06/15/2011	21	0.003	0.003	0.002	0.002	0.001	0	0.001	0.001	0.03	0	0.02	299.67	0.588	-0.435743
06/15/2011	22	0.003	0.003	0.002	0.003	0.001	0	0.001	0.001	0.032	0	0.021	299.883	0.53	-0.571272
06/15/2011	23	0.003	0.002	0.002	0.003	0.001	0	0.001	0.001	0.03	0	0.02	299.016	0.578	-0.491433
06/15/2011	24	0.001	0.001	0.002	0.002	0.001	0	0.001	0.001	0.024	0	0.022	297.648	0.67	0.0883237
06/16/2011	1	0	0.001	0.002	0.001	0.001	0	0.001	0	0.02	0	0.025	297.036	0.704	-0.318683
06/16/2011	2	0	0.002	0.003	0.001	0.001	0	0.001	0.001	0.023	0	0.03	296.781	0.703	-0.359834
06/16/2011	3	0	0.008	0.006	0.002	0.001	0	0.001	0.001	0.03	0	0.033	296.38	0.724	-0.171601
06/16/2011	4	0.001	0.015	0.007	0.002	0.003	0	0.001	0.001	0.036	0	0.036	296.261	0.722	-0.0285838
06/16/2011	5	0	0.013	0.007	0.003	0.002	0	0.001	0.001	0.028	0.001	0.032	296.05	0.722	-0.220252
06/16/2011	6	0	0.009	0.007	0.002	0.002	0	0.001	0.001	0.022	0.001	0.032	295.829	0.725	-0.408043
06/16/2011	7	0	0.009	0.007	0.002	0.002	0	0.001	0.002	0.022	0.001	0.028	295.984	0.764	-0.288635
06/16/2011	8	0.001	0.011	0.008	0.002	0.002	0	0.001	0.002	0.024	0.001	0.026	298.09	0.706	-0.0745273
06/16/2011	9	0	0.014	0.011	0.001	0.002	0	0.001	0.002	0.018	0.001	0.02	299.344	0.661	-0.176064
06/16/2011	10	0	0.008	0.009	0.001	0.001	0	0.001	0.001	0.014	0.001	0.016	300.731	0.633	-0.233435
06/16/2011	11	0.001	0.007	0.009	0.001	0.001	0	0.001	0.001	0.014	0.001	0.015	303.051	0.585	0.174093
06/16/2011	12	0	0.01	0.012	0	0.001	0	0	0.001	0.011	0	0.016	305.156	0.519	-0.604462
06/16/2011	13	0	0.008	0.011	0	0	0	0	0	0.009	0	0.018	306.854	0.485	-0.763754
06/16/2011	14	0	0.004	0.008	0	0	0	0	0	0.009	0	0.014	305.871	0.497	-0.66421
06/16/2011	15	0.001	0.001	0.005	0	0	0	0	0	0.011	0	0.009	305.145	0.531	0.193879
06/16/2011	16	0.002	0.001	0.003	0	0	0	0	0	0.009	0	0.005	305.085	0.504	-0.612355
06/16/2011	17	0.002	0	0.002	0	0	0	0	0	0.007	0	0.004	304.527	0.475	-0.674362
06/16/2011	18	0.006	0	0.002	0	0	0	0	0	0.006	0	0.003	303.28	0.463	-0.238639
06/16/2011	19	0.013	0	0.001	0	0	0	0	0	0.005	0	0.003	302.127	0.518	0.187422
06/16/2011	20	0.019	0.001	0.002	0	0	0	0	0	0.005	0	0.003	300.886	0.563	0.469415
06/16/2011	21	0.016	0	0.002	0	0	0	0.001	0	0.004	0	0.003	299.697	0.617	0.500366
06/16/2011	22	0.009	0	0.002	0	0	0	0	0	0.003	0	0.002	299.23	0.635	0.304842
06/16/2011	23	0.006	0	0.001	0	0	0	0	0	0.002	0	0.001	298.761	0.679	0.286384
06/16/2011	24	0.004	0	0.001	0	0	0	0	0	0.003	0	0.001	298.039	0.761	0.378983
06/17/2011	1	0.002	0.001	0.001	0	0	0	0	0	0.003	0	0.002	297.288	0.858	0.20723
06/17/2011	2	0.001	0.001	0.001	0	0	0	0	0	0.005	0	0.004	296.824	0.919	0.512005
06/17/2011	3	0.001	0	0.001	0	0	0	0	0	0.006	0	0.003	296.623	0.921	0.609298
06/17/2011	4	0.002	0	0.001	0	0	0	0	0	0.005	0	0.003	296.453	0.925	0.692771
06/17/2011	5	0.004	0	0.001	0	0.001	0	0	0	0.004	0	0.003	296.456	0.906	0.706395
06/17/2011	6	0.005	0	0.001	0	0.001	0	0	0	0.003	0	0.002	296.49	0.911	0.928861
06/17/2011	7	0.005	0	0.001	0	0.001	0	0	0	0.003	0	0.002	297.599	0.862	0.63544
06/17/2011	8	0.003	0.002	0.002	0	0	0	0	0	0.005	0	0.003	299.077	0.811	0.190727
06/17/2011	9	0	0.016	0.008	0	0	0	0	0	0.006	0	0.01	300.129	0.772	-0.404736
06/17/2011	10	0	0.039	0.021	0	0.001	0	0	0	0.009	0	0.013	301.047	0.728	-0.38227
06/17/2011	11	0	0.046	0.025	0	0.001	0	0	0	0.01	0	0.015	301.911	0.691	-0.447742
06/17/2011	12	0	0.038	0.023	0	0.001	0	0	0	0.01	0	0.015	302.395	0.669	-0.468743
06/17/2011	13	0	0.032	0.02	0	0	0	0	0	0.01	0	0.016	302.44	0.662	-0.513453
06/17/2011	14	0	0.03	0.019	0	0	0	0	0	0.01	0	0.019	302.315	0.659	-0.580477
06/17/2011	15	0	0.027	0.02	0	0	0	0	0	0.009	0	0.023	302.297	0.657	-0.648875
06/17/2011	16	0	0.025	0.022	0	0	0	0	0	0.01	0	0.028	302.163	0.656	-0.663393
06/17/2011	17	0	0.025	0.022	0	0	0	0	0.001	0.01	0	0.028	301.762	0.659	-0.664057
06/17/2011	18	0	0.028	0.019	0	0.001	0	0	0.001	0.011	0	0.029	301.027	0.674	-0.645883
06/17/2011	19	0	0.041	0.013	0	0.001	0	0.001	0.001	0.012	0	0.031	299.993	0.699	-0.610254
06/17/2011	20	0	0.059	0.008	0.001	0.001	0	0.001	0.001	0.017	0	0.036	298.361	0.741	-0.525308
06/17/2011	21	0	0.063	0.005	0.001	0.001	0	0.001	0.001	0.022	0	0.039	297.516	0.763	-0.44924
06/17/2011	22	0	0.053	0.005	0.001	0.002	0	0.001	0.002	0.026	0	0.037	296.821	0.805	-0.288442
06/17/2011	23	0.001	0.042	0.005	0.001	0.002	0	0.001	0.002	0.028	0	0.03	296.412	0.831	-0.0546133
06/17/2011	24	0.001	0.033	0.004	0.001	0.003	0.001	0.001	0.002	0.029	0	0.024	296.744	0.805	0.0530151
06/18/2011	1	0.003	0.029	0.004	0.001	0.003	0.001	0.002	0.001	0.029	0	0.02	296.386	0.834	0.179159
06/18/2011	2	0.003	0.026	0.003	0.001	0.003	0.001	0.002	0.001	0.03	0	0.02	296.104	0.864	0.334624
06/18/2011	3	0.003	0.023	0.002	0.001	0.002	0.001	0.002	0.001	0.029	0	0.019	295.836	0.891	0.507377
06/18/2011	4	0.005	0.021	0.002	0.002	0.002	0.001	0.002	0.002	0.026	0	0.017	296.467	0.86	0.597617
06/18/2011	5	0.004	0.027	0.005	0.002	0.003	0.001	0.003	0.002	0.023	0.001	0.016	296.422	0.876	0.46515
06/18/2011	6	0.003	0.038	0.009	0.001	0.003	0.001	0.003	0.002	0.022	0.001	0.017	296.496	0.886	0.333656
06/18/2011	7	0.003	0.044	0.011	0.001	0.003	0.001	0.003	0.002	0.022	0.001	0.017	297.101	0.896	0.390967
06/18/2011	8	0.003	0.056	0.018	0.001	0.004	0	0.003	0.002	0.023	0.001	0.019	299.218	0.826	0.165019
06/18/2011	9	0.002	0.083	0.032	0.001	0.004	0	0.002	0.002	0.023	0.002	0.02	301.333	0.743	0.119962
06/18/2011	10	0.001	0.092	0.038	0.001	0.003	0	0.002	0.001	0.021	0.002	0.021	303.409	0.664	0.193229
06/18/2011	11	0.001	0.085	0.039	0.001	0.002	0	0.001	0.001	0.017	0.001	0.02	305.451	0.59	-0.179306
06/18/2011	12	0	0.067	0.031	0.001	0.002	0	0.001	0.001	0.014	0.001	0.018	307.212	0.526	-0.485605
06/18/2011	13	0	0.053	0.027	0.001	0.002	0	0.001	0.001	0.012	0.001	0.018	307.5	0.487	-0.653766
06/18/2011	14	0	0.039	0.023	0.001	0.001	0	0.001	0	0.011	0.001	0.018	308.483	0.447	-0.739369
06/18/2011	15	0	0.014	0.015	0.001	0.001	0	0	0	0.01	0	0.016	306.154	0.537	-0.635364
06/18/2011	16	0.001	0.003	0.006	0.001	0.001	0	0	0	0.015	0	0.016	305.75	0.518	0.309274
06/18/2011	17	0.002	0.001	0.004	0.001	0.001	0	0.001	0	0.02	0	0.014	305.792	0.473	-0.355825
06/18/2011	18	0.003	0.001	0.003	0.001	0.001	0	0.001	0	0.024	0	0.013	305.011	0.548	-0.333387
06/18/2011	19	0.005	0.001	0.002	0.001	0.001	0	0.001	0	0.026	0	0.014	304.015	0.55	-0.180769
06/18/2011	20	0.008	0.002	0.003	0.001	0.001	0	0.001	0	0.028	0	0.015	301.995	0.562	0.0486195
06/18/2011	21	0.006	0.002	0.003	0.001	0.001	0	0.001	0	0.029	0	0.016	300.471	0.588	-0.024108
06/18/2011	22	0.003	0.002	0.003	0.002	0.001	0	0.001	0	0.031	0	0.017	299.223	0.703	1.30015
06/18/2011	23	0.003	0.002	0.002	0.003	0.002	0	0.001	0	0.03	0	0.02	298.525	0.758	0.0279047
06/18/2011	24	0.001	0.011	0.006	0.004	0.003	0	0.001	0.001	0.027	0	0.026	300.031	0.68	0.127745
06/19/2011	1	0	0.028	0.012	0.005	0.003	0	0.001	0.002	0.024	0.001	0.031	299.772	0.72	-0.317534
06/19/2011	2	0.001	0.032	0.013	0.005	0.004	0.001	0.002	0.003	0.023	0.001	0.03	299.354	0.766	-0.241654
06/19/2011	3	0.001	0.033	0.016	0.005	0.004	0.001	0.002	0.003	0.021	0.001	0.025	299.014	0.788	-0.140661
06/19/2011	4	0.002	0.028	0.015	0.004	0.004	0.001	0.002	0.003	0.021	0.002	0.022	298.57	0.799	0.00891409
06/19/2011	5	0.002	0.022	0.014	0.003	0.004	0.001	0.002	0.003	0.023	0.002	0.02	298.24	0.827	0.118243
06/19/2011	6	0.003	0.02	0.014	0.003	0.004	0.001	0.002	0.003	0.023	0.002	0.019	297.928	0.862	0.212562
06/19/2011	7	0.003	0.02	0.016	0.002	0.004	0.001	0.002	0.002	0.023	0.002	0.018	298.465	0.876	0.308185
06/19/2011	8	0.003	0.022	0.02	0.002	0.004	0	0.002	0.002	0.025	0.002	0.018	300.478	0.808	0.186704
06/19/2011	9	0.003	0.028	0.027	0.002	0.003	0	0.002	0.002	0.025	0.002	0.018	302.103	0.733	0.0216434
06/19/2011	10	0.003	0.032	0.028	0.002	0.003	0	0.001	0.001	0.024	0.002	0.018	303.763	0.658	-0.0555215
06/19/2011	11	0.002	0.041	0.027	0.001	0.003	0	0.001	0.001	0.023	0.001	0.019	305.543	0.583	0.222235
06/19/2011	12	0.001	0.055	0.029	0.001	0.002	0	0.001	0.001	0.019	0.001	0.019	307.601	0.495	0.653774
06/19/2011	13	0	0.045	0.027	0.001	0.001	0	0.001	0.001	0.017	0.001	0.018	308.683	0.439	-0.115556
06/19/2011	14	0	0.037	0.023	0.001	0.001	0	0.001	0	0.016	0.001	0.019	309.008	0.396	-0.533497
06/19/2011	15	0	0.027	0.017	0	0.001	0	0.001	0	0.016	0	0.02	308.813	0.402	-0.608598
06/19/2011	16	0	0.015	0.012	0.001	0.001	0	0	0	0.017	0	0.021	308.45	0.377	-0.621178
06/19/2011	17	0	0.009	0.008	0.001	0.001	0	0.001	0.001	0.021	0	0.021	308.859	0.361	0.682773
06/19/2011	18	0.001	0.007	0.006	0.001	0.001	0	0.001	0.001	0.024	0	0.02	308.128	0.392	0.714715
06/19/2011	19	0.003	0.007	0.005	0.001	0.001	0	0.001	0.001	0.028	0	0.02	306.374	0.405	-0.333735
06/19/2011	20	0.004	0.01	0.003	0.002	0.001	0	0.001	0.001	0.032	0	0.021	303.691	0.453	-0.532691
06/19/2011	21	0.004	0.01	0.003	0.003	0.002	0	0.001	0.001	0.033	0	0.022	303.153	0.451	-0.622907
06/19/2011	22	0.002	0.008	0.004	0.003	0.002	0	0.001	0.001	0.031	0	0.023	302.358	0.515	-0.263247
06/19/2011	23	0.001	0.009	0.006	0.003	0.002	0	0.001	0.001	0.027	0	0.025	300.442	0.642	0.206125
06/19/2011	24	0.001	0.011	0.008	0.002	0.002	0	0.001	0.002	0.025	0	0.028	299.875	0.686	-0.109591
06/20/2011	1	0.001	0.014	0.007	0.003	0.002	0	0.001	0.002	0.025	0.001	0.028	299.368	0.746	-0.103878
06/20/2011	2	0.001	0.029	0.011	0.003	0.003	0	0.001	0.002	0.021	0.001	0.022	299.043	0.784	-0.0187287
06/20/2011	3	0.001	0.039	0.013	0.002	0.002	0	0.001	0.002	0.015	0.001	0.016	298.827	0.8	-0.0273102
06/20/2011	4	0.001	0.04	0.013	0.002	0.002	0	0.001	0.002	0.012	0.001	0.014	298.616	0.812	-0.0847972
[truncated: 1,628 more rows]

## Sheet: CMAQ_2011_NO_CRUST
CENTVIL	32.9029	-87.2497
[truncated: 2,066 more rows]

## Sheet: Comparison
Summer_start	Summer_stop	NO3_avg	NH4_avg	R_SO4_avg	SO4_avg	pH_avg
[truncated: 12 more rows]
